# Supplementary material for: Exportin-5 binding precedes 5′- and 3′-end processing of tRNA precursors in Drosophila
Source: PubMed Central journal article supplement (PMC11402290; doi:10.1016/j.jbc.2024.107632), 2024-08-02

mir-bantam (chr3L:642222(+))

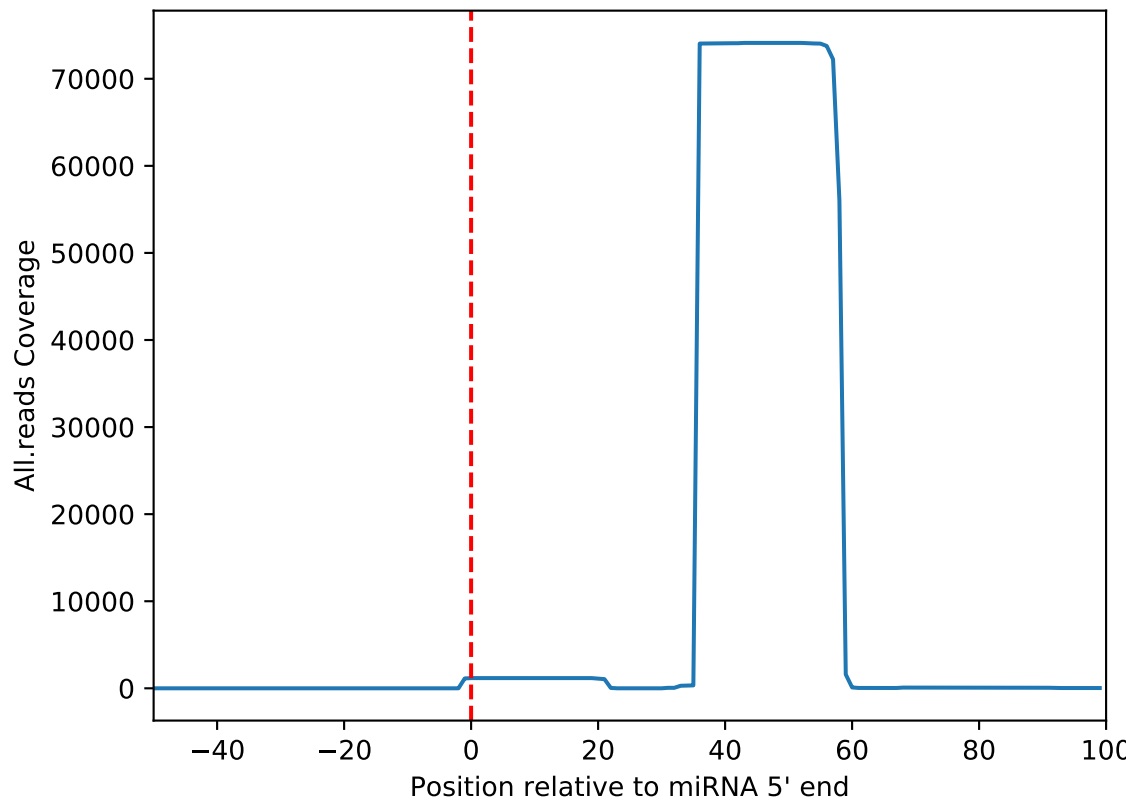

mir-bantam (chr3L:642222(+))

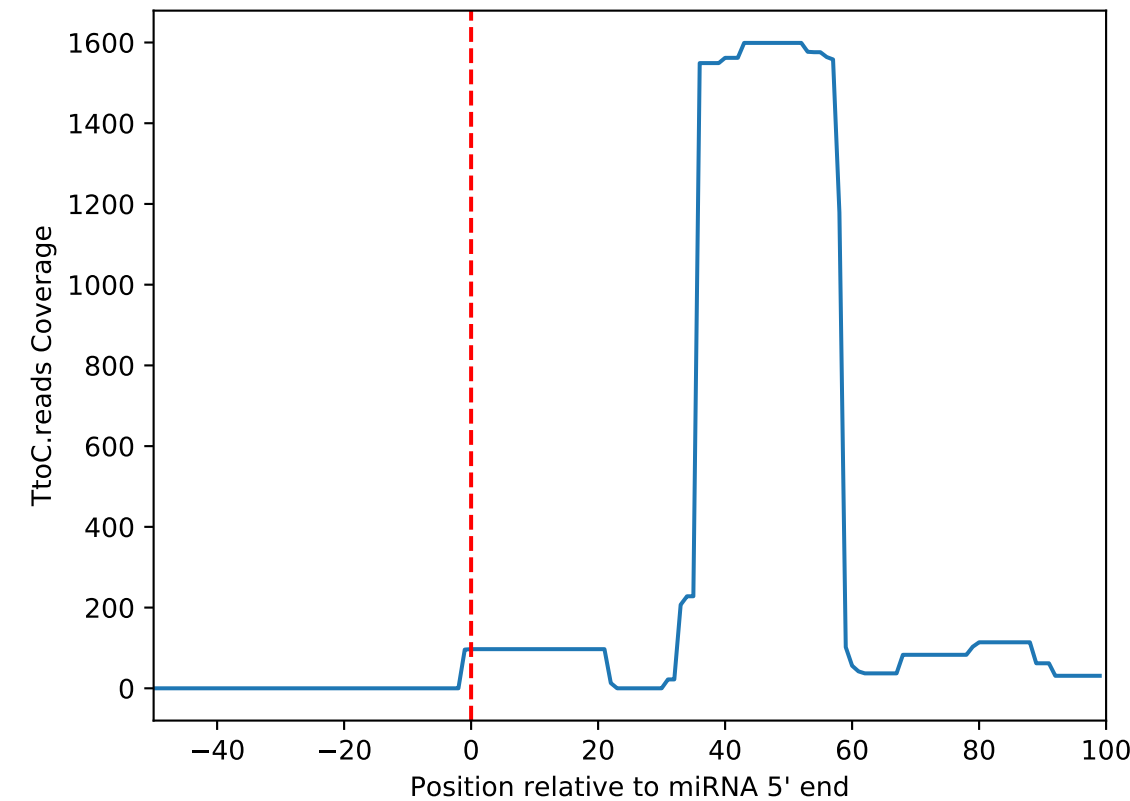

mir-bantam (chr3L:642222(+))

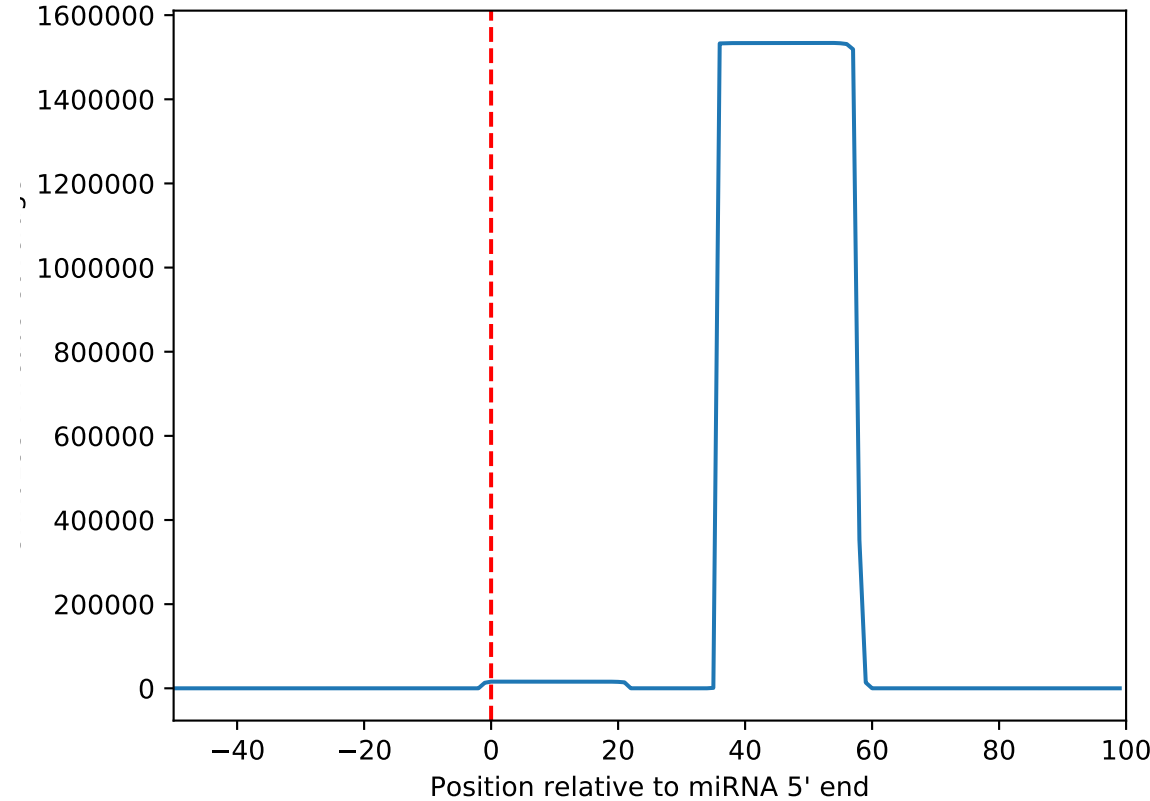

mir-bantam (chr3L:642222(+))

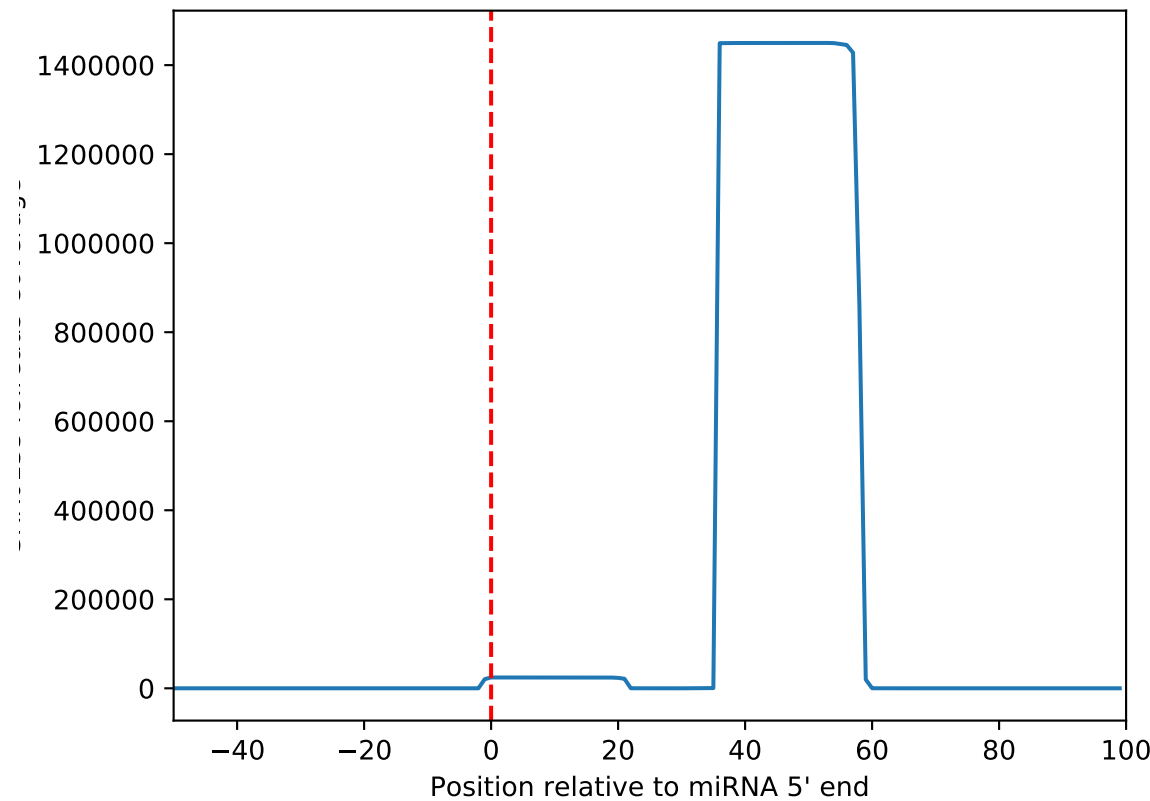

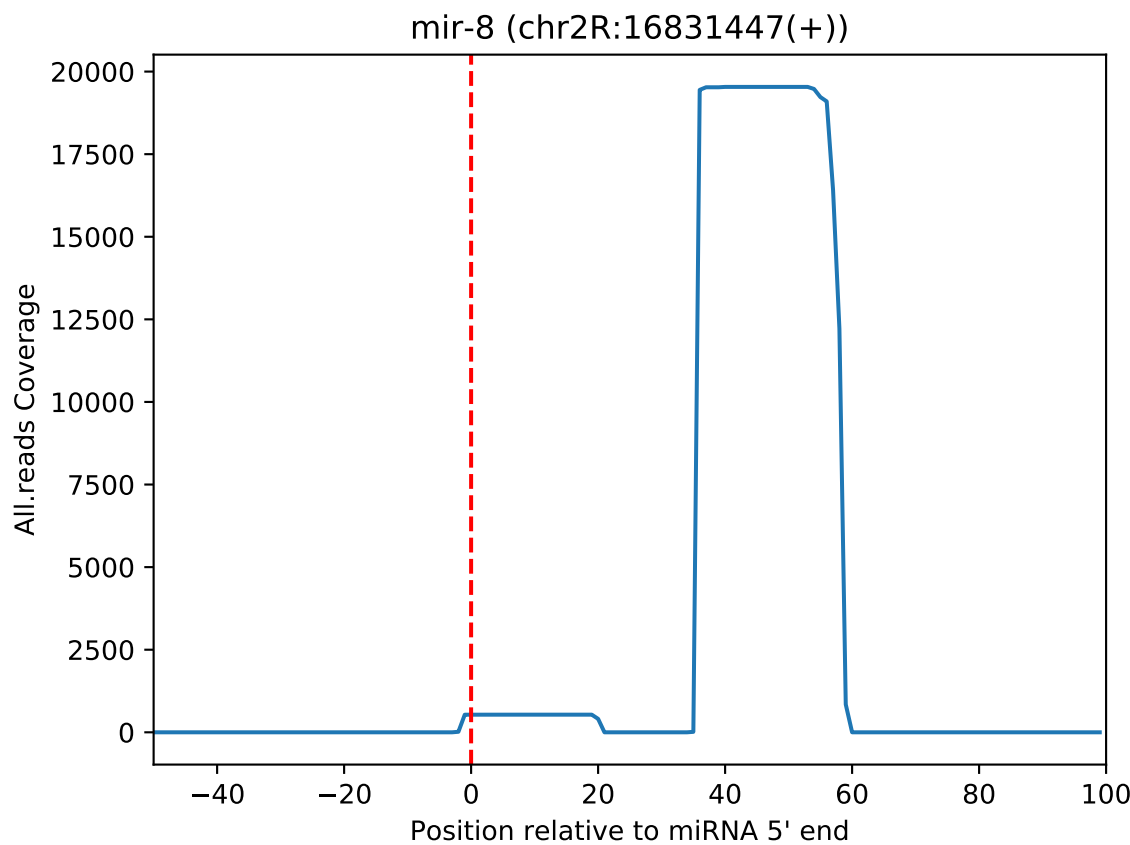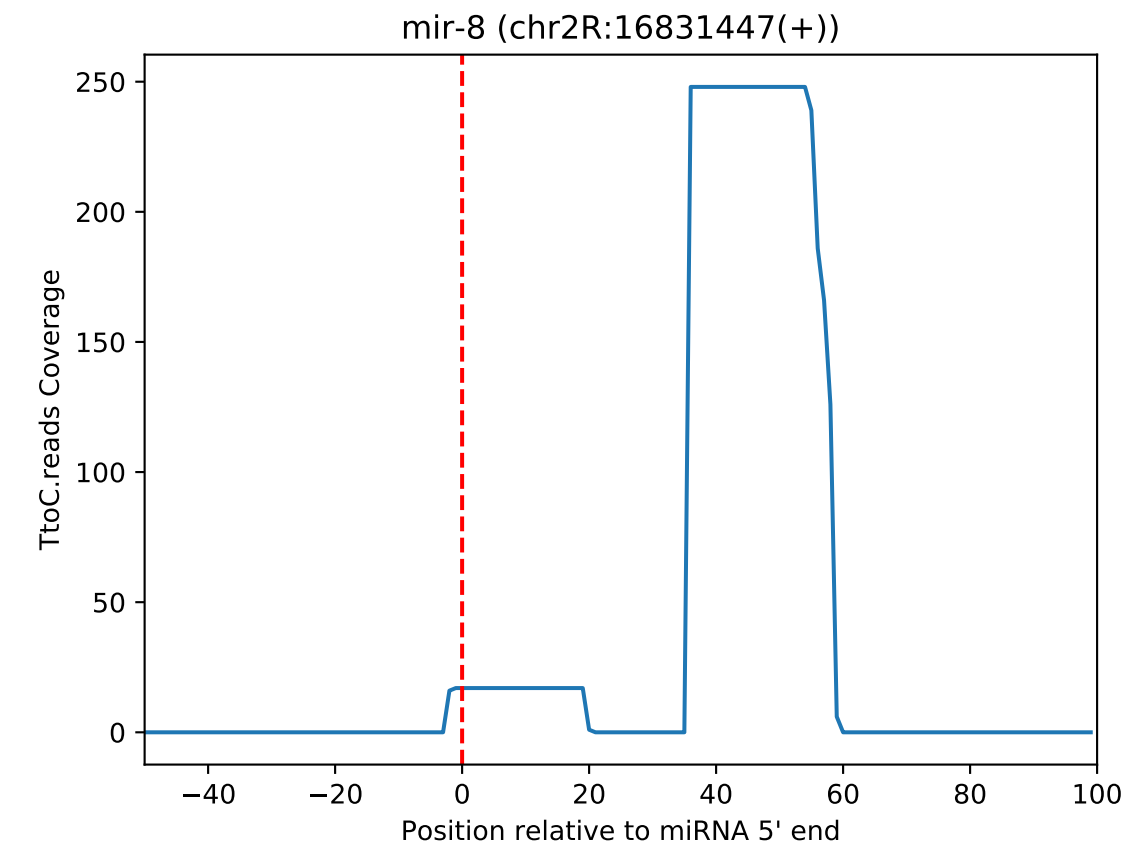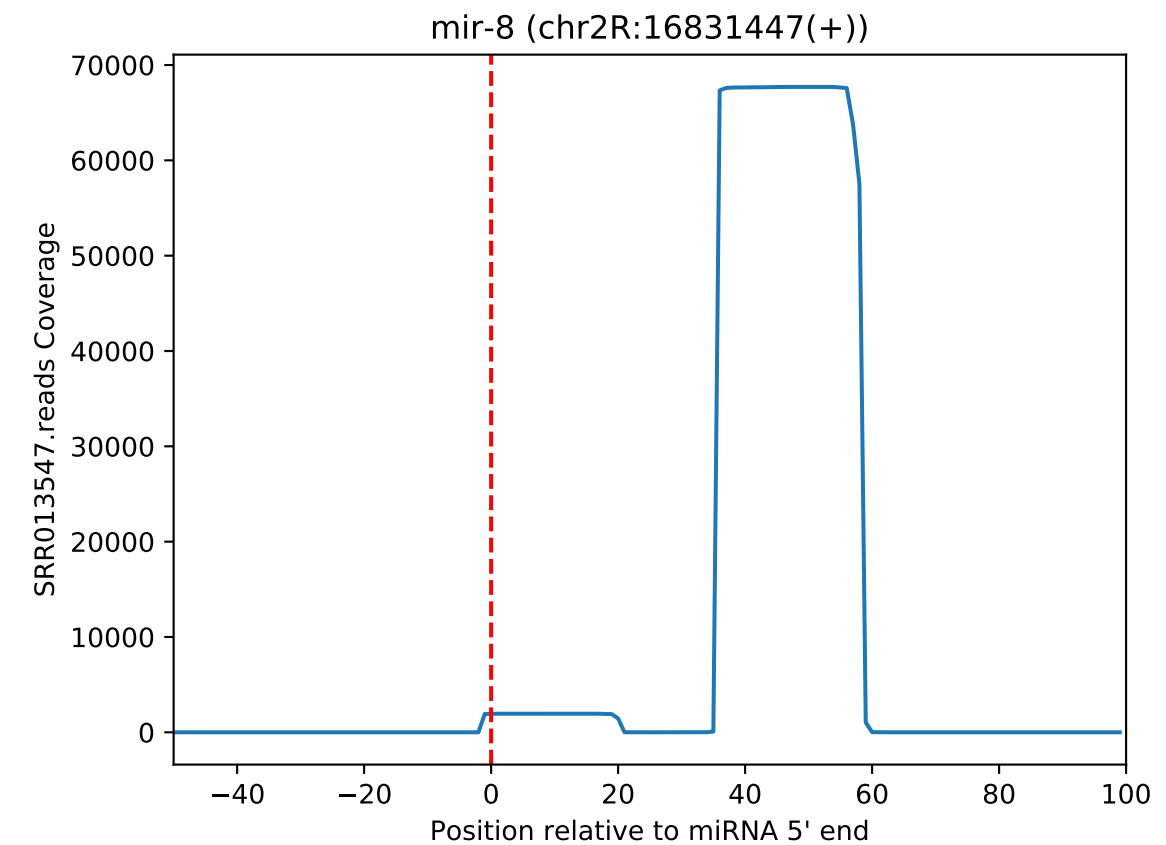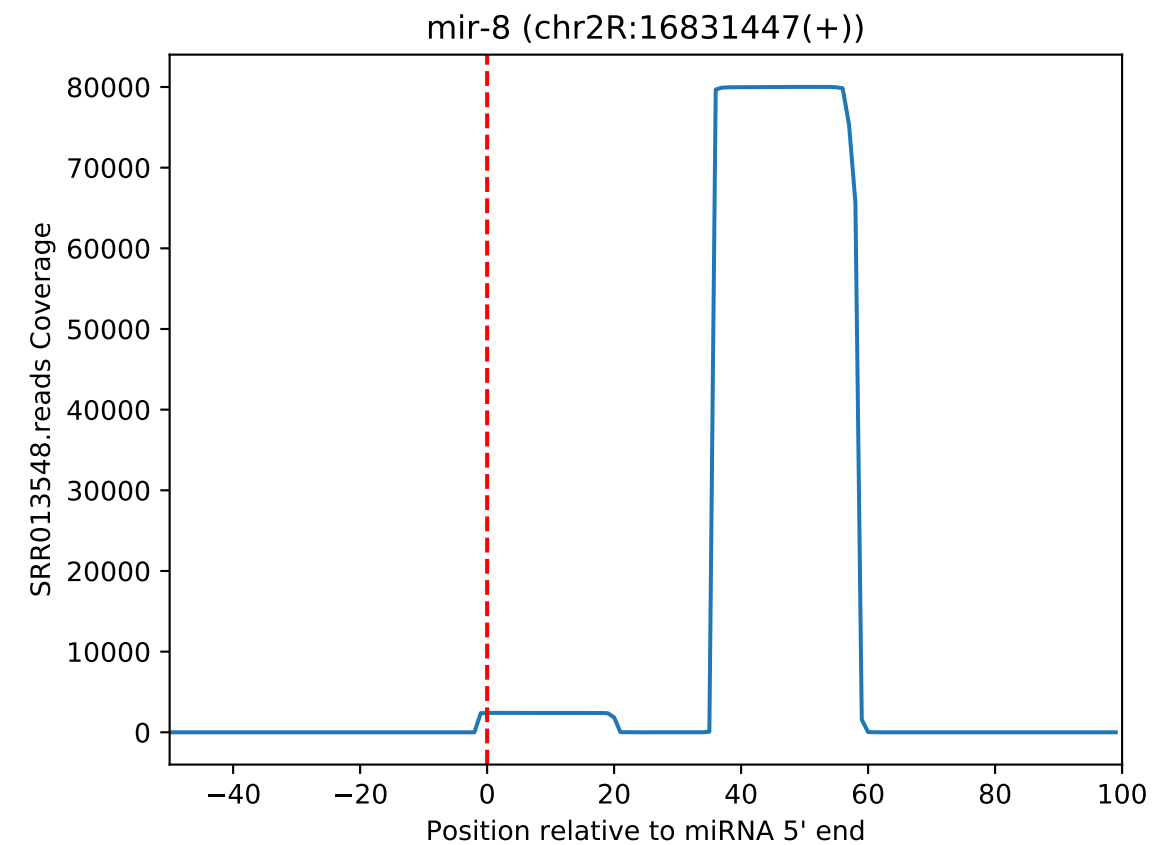

mir-2a-2 (chr2L:19569554(-))

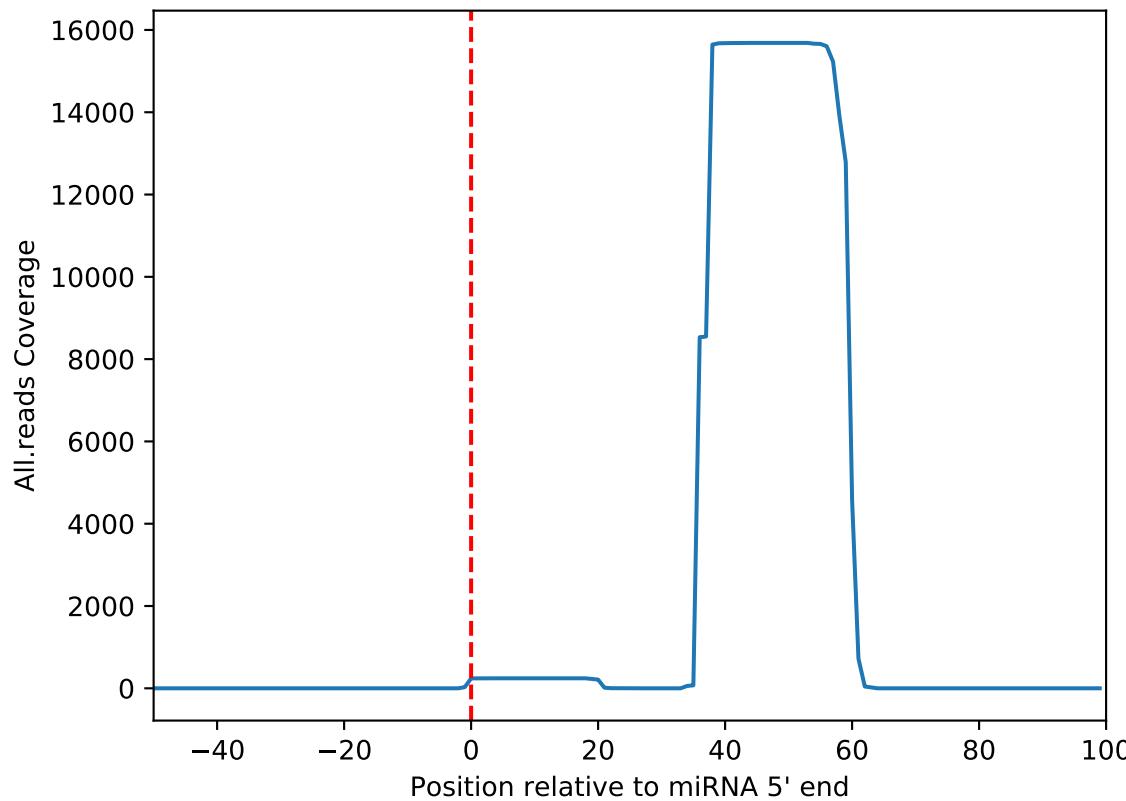

mir-2a-2 (chr2L:19569554(-))

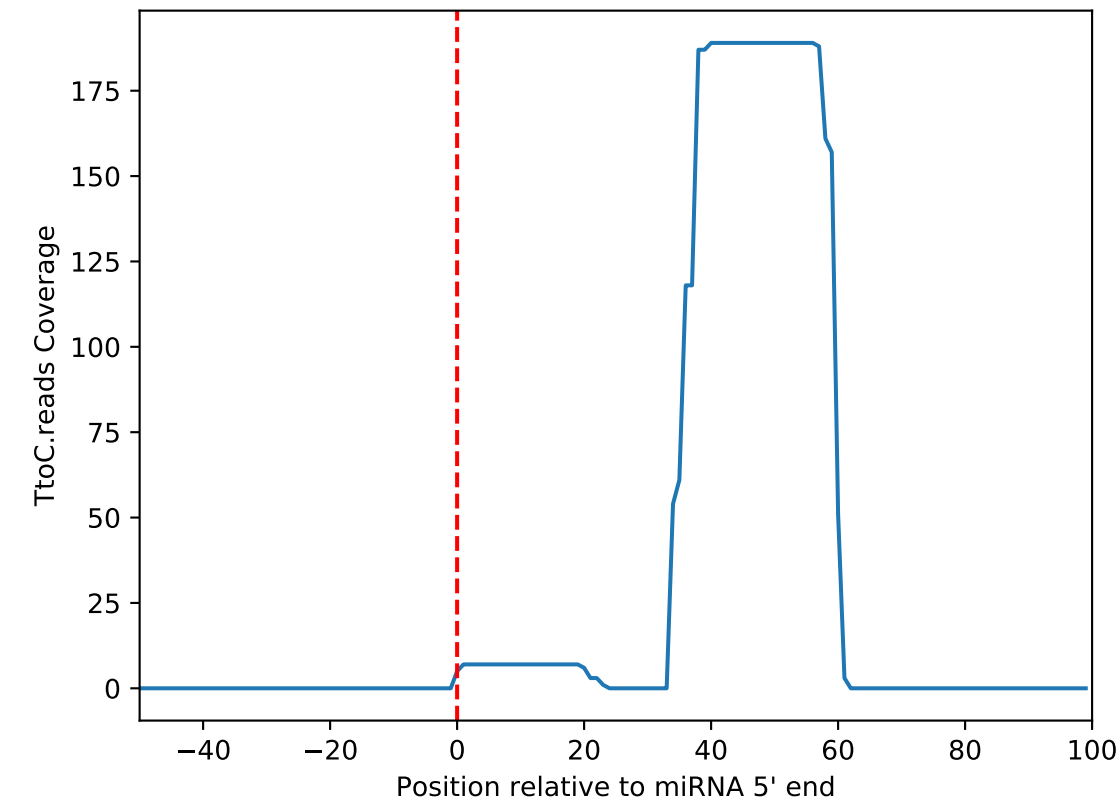

mir-2a-2 (chr2L:19569554(-))

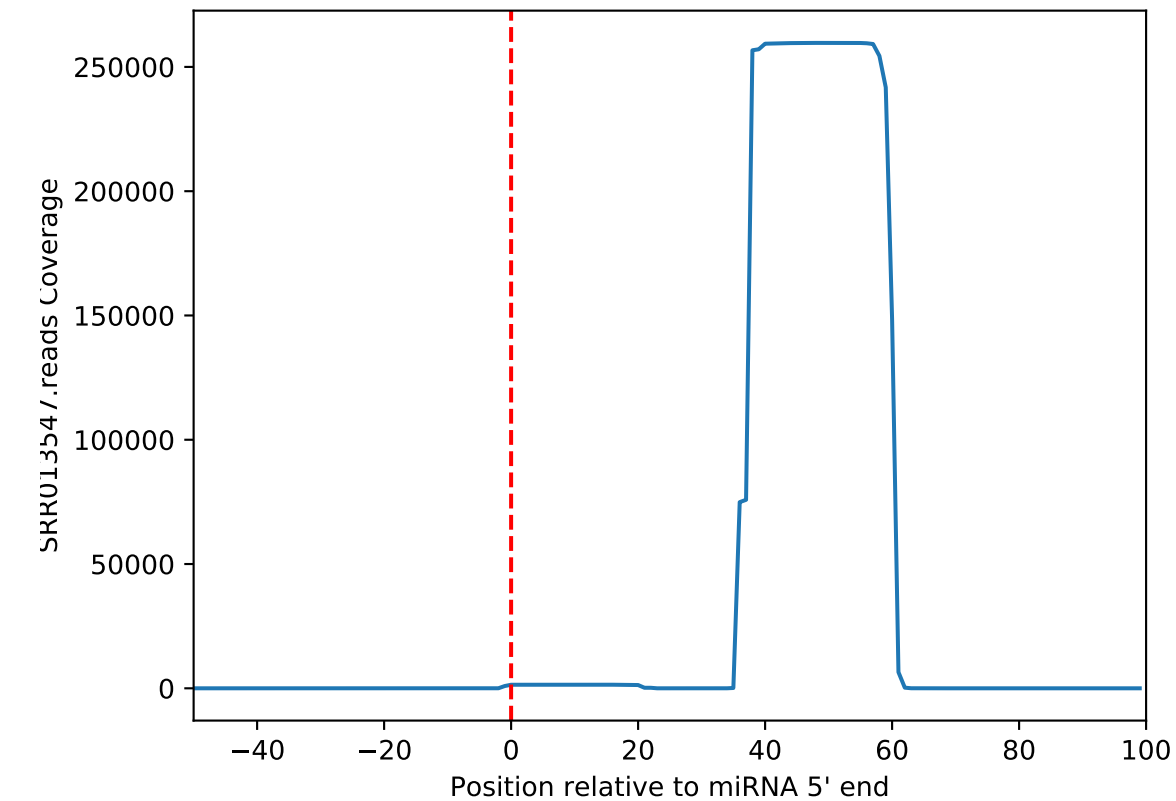

mir-2a-2 (chr2L:19569554(-))

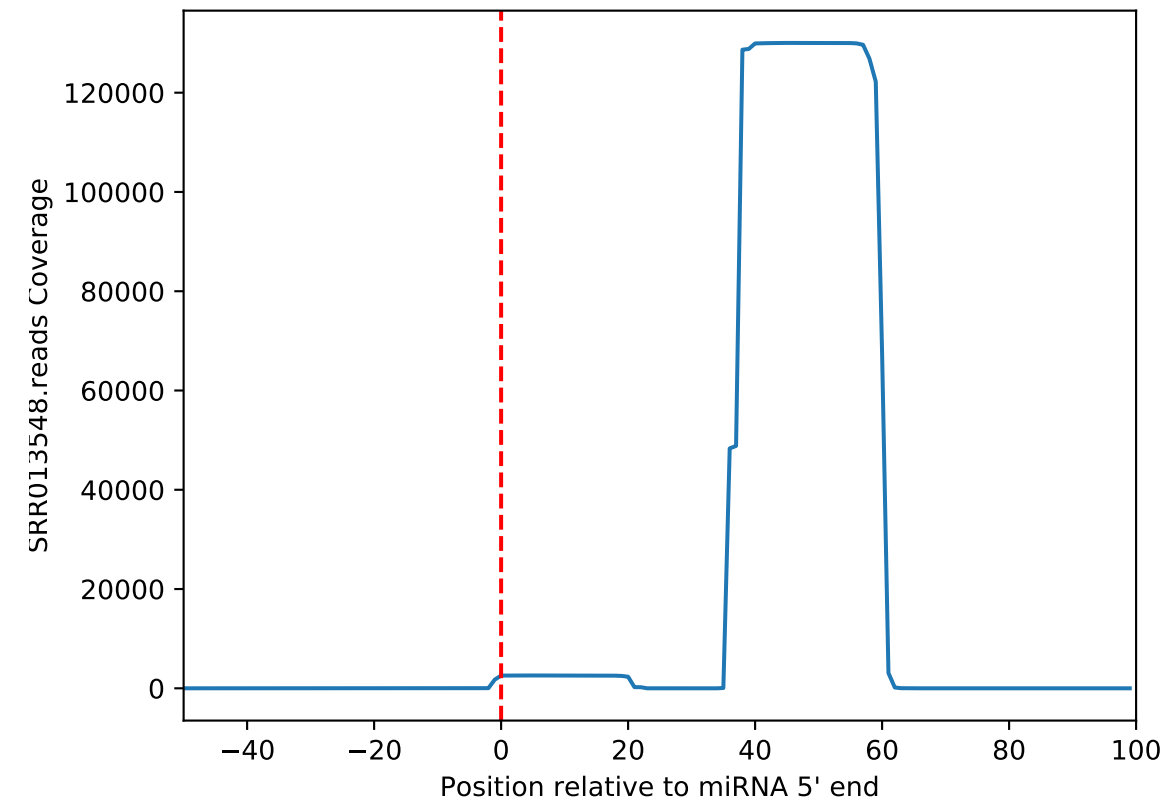

mir-34 (chr3R:10100952(+))

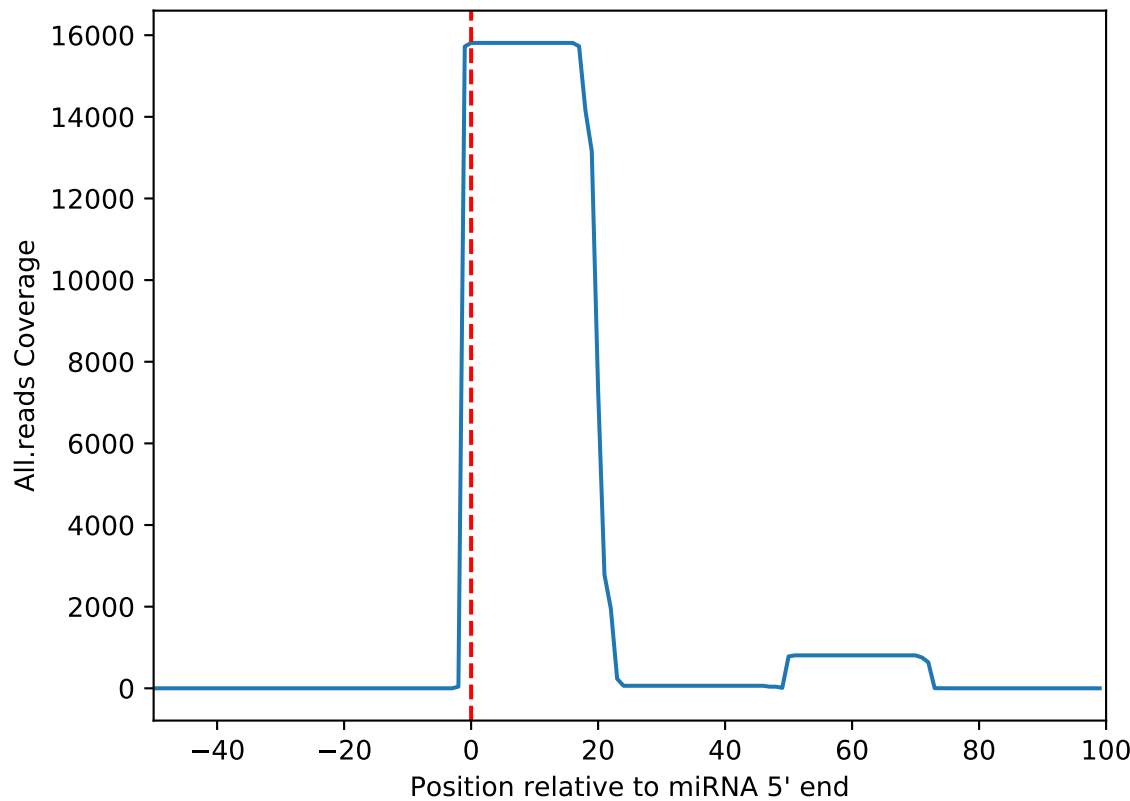

mir-34 (chr3R:10100952(+))

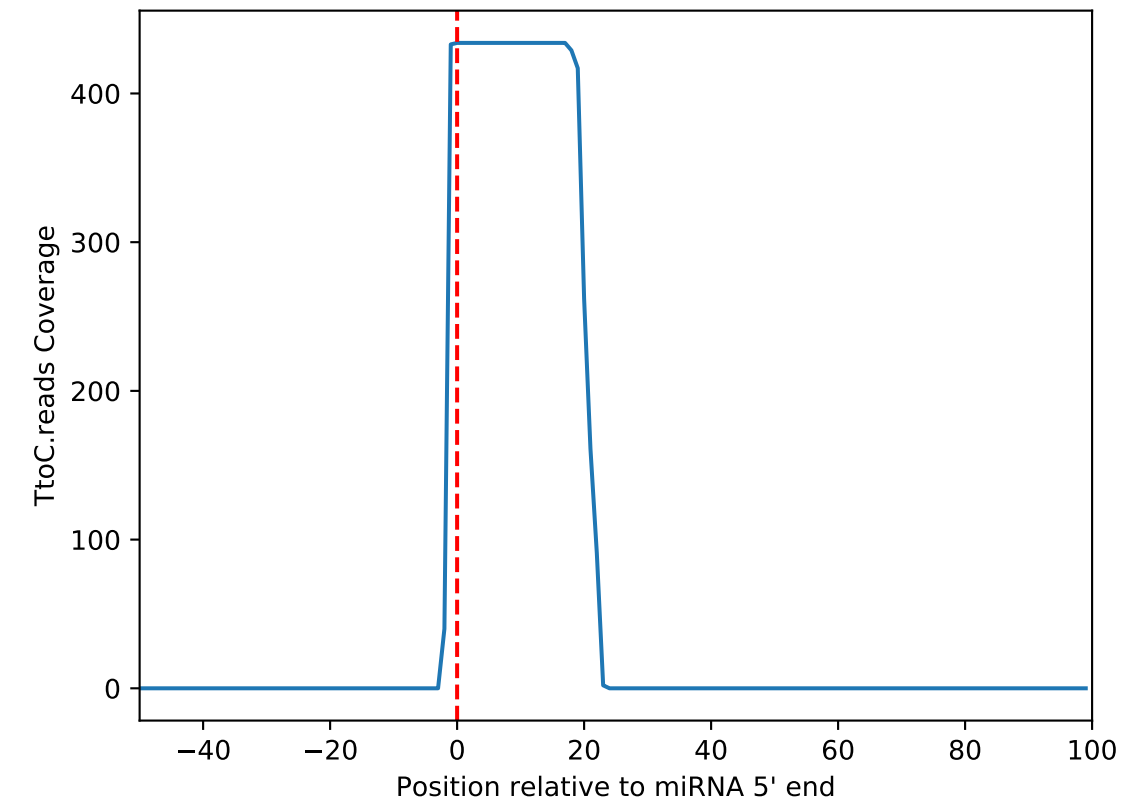

mir-34 (chr3R:10100952(+))

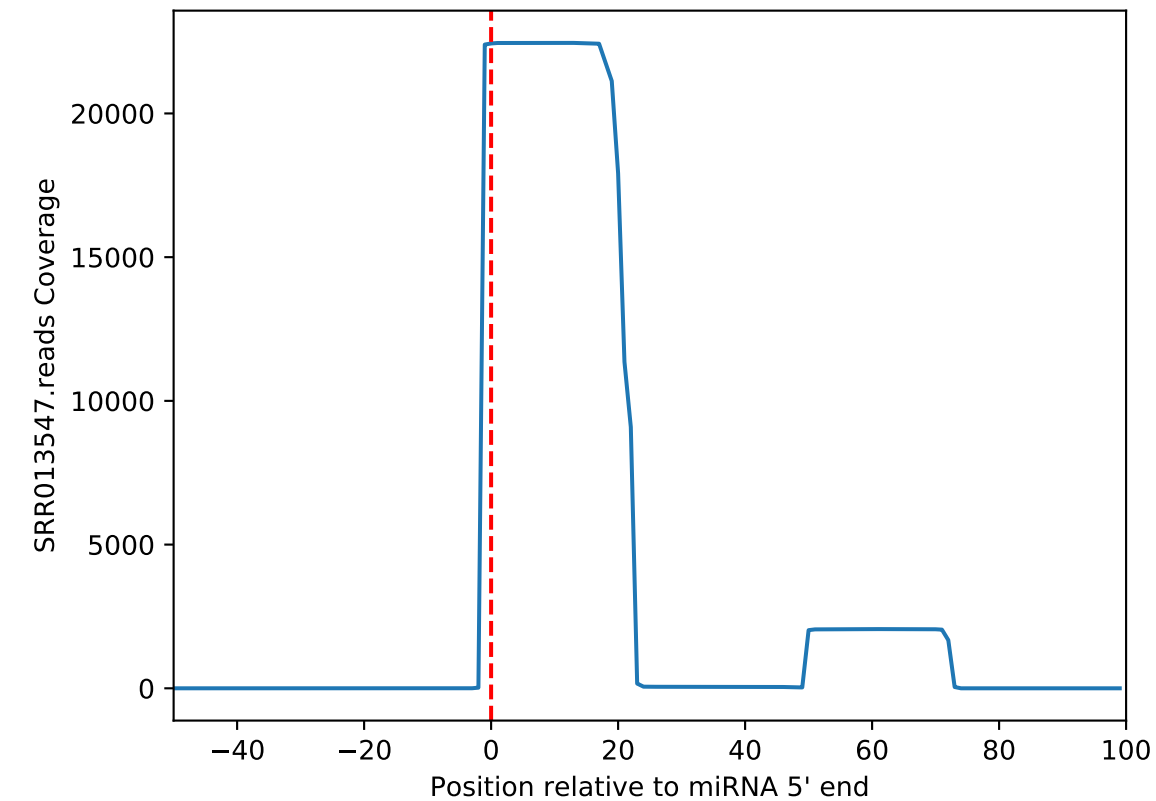

mir-34 (chr3R:10100952(+))

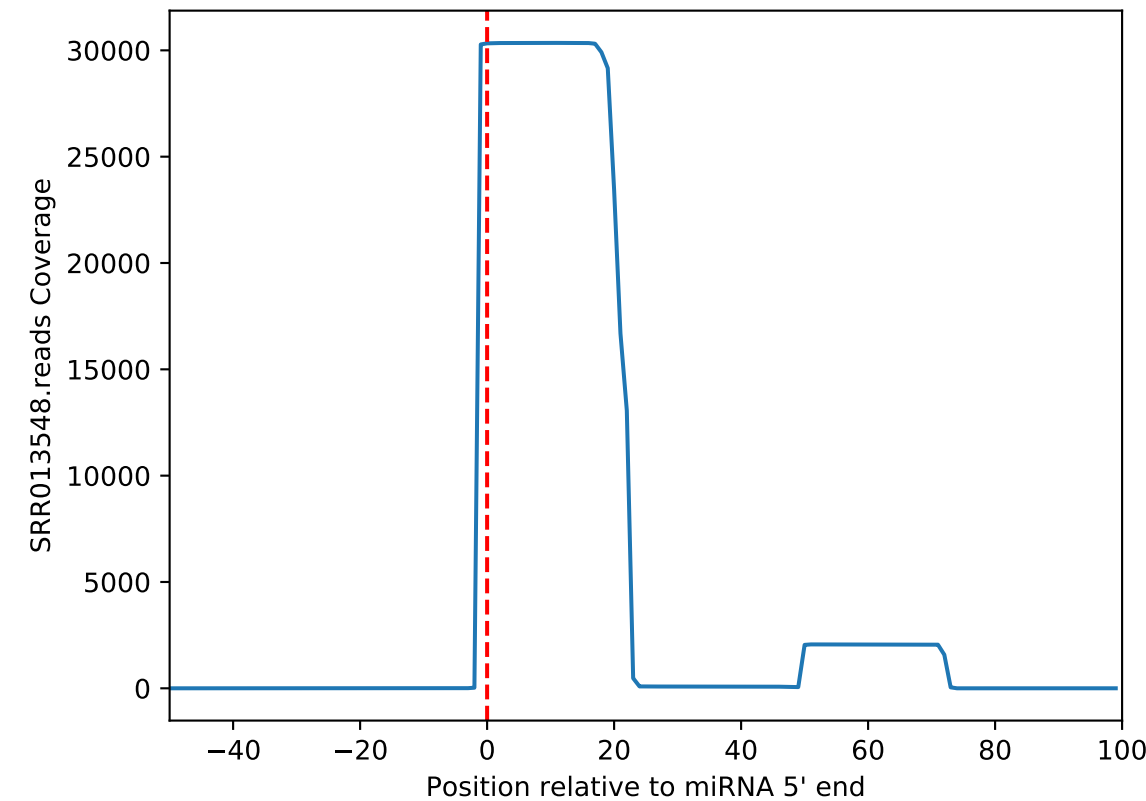

mir-12 (chrX:15509479(+))

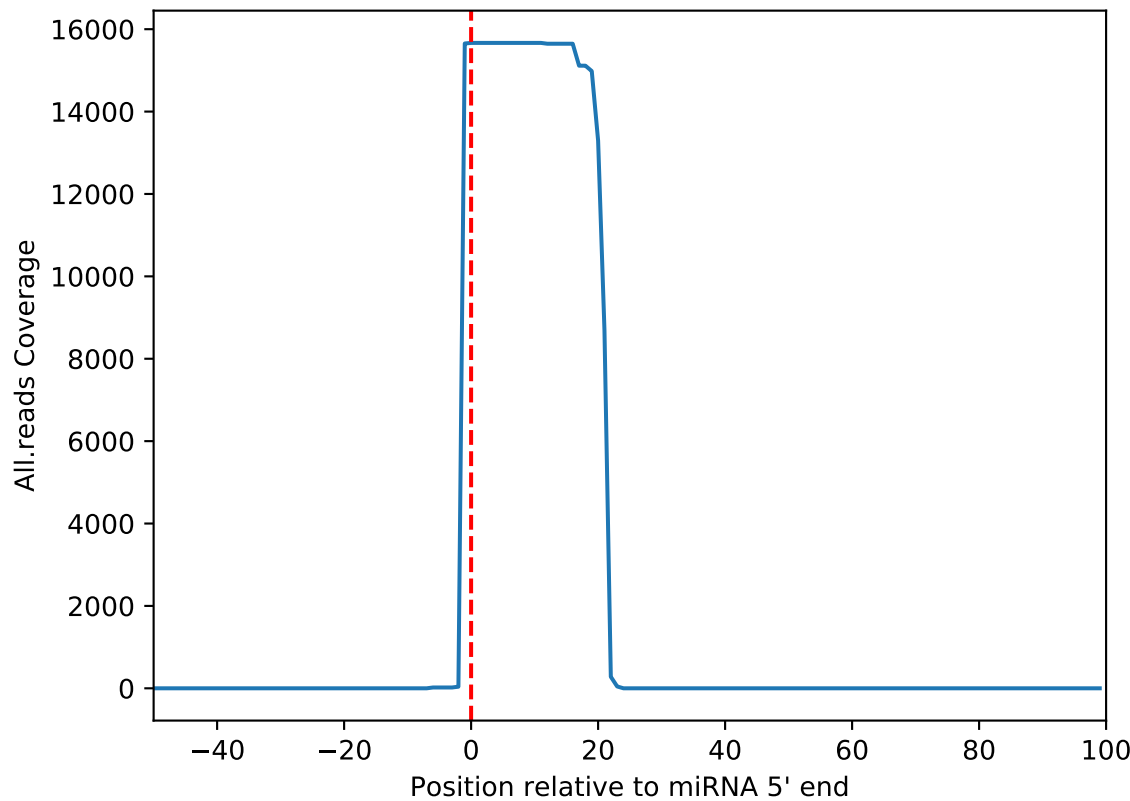

mir-12 (chrX:15509479(+))

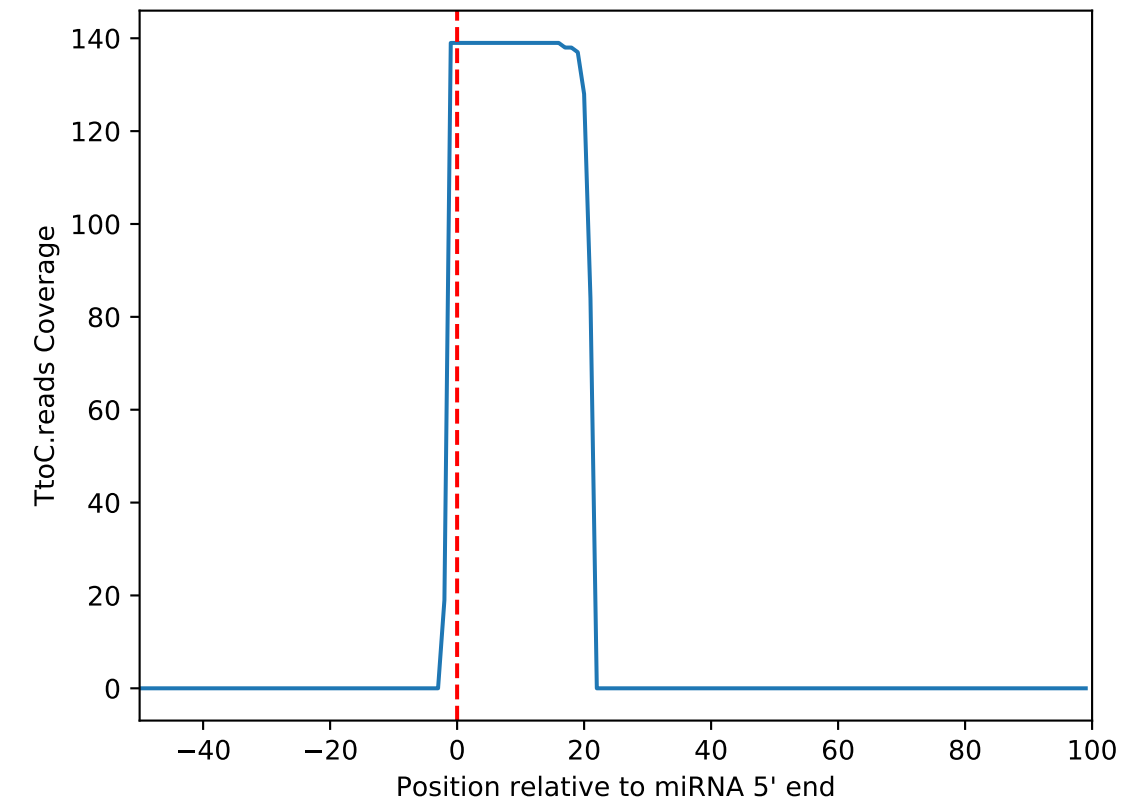

mir-12 (chrX:15509479(+))

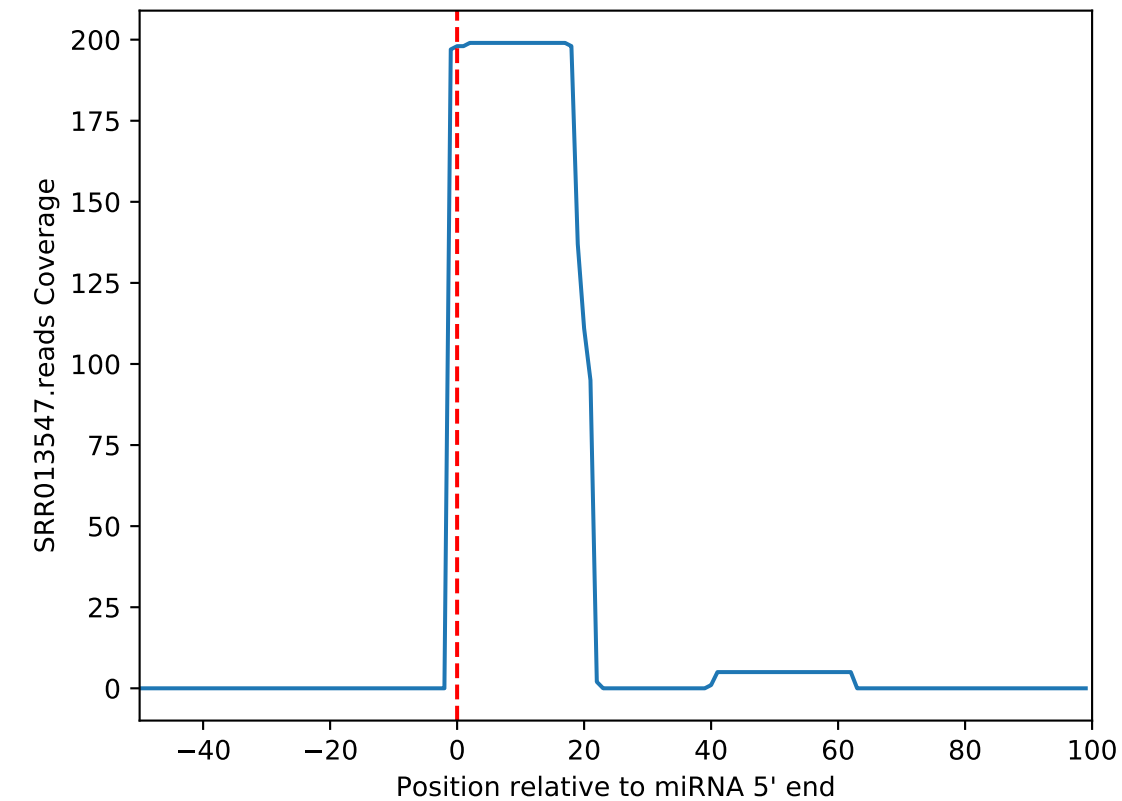

mir-12 (chrX:15509479(+))

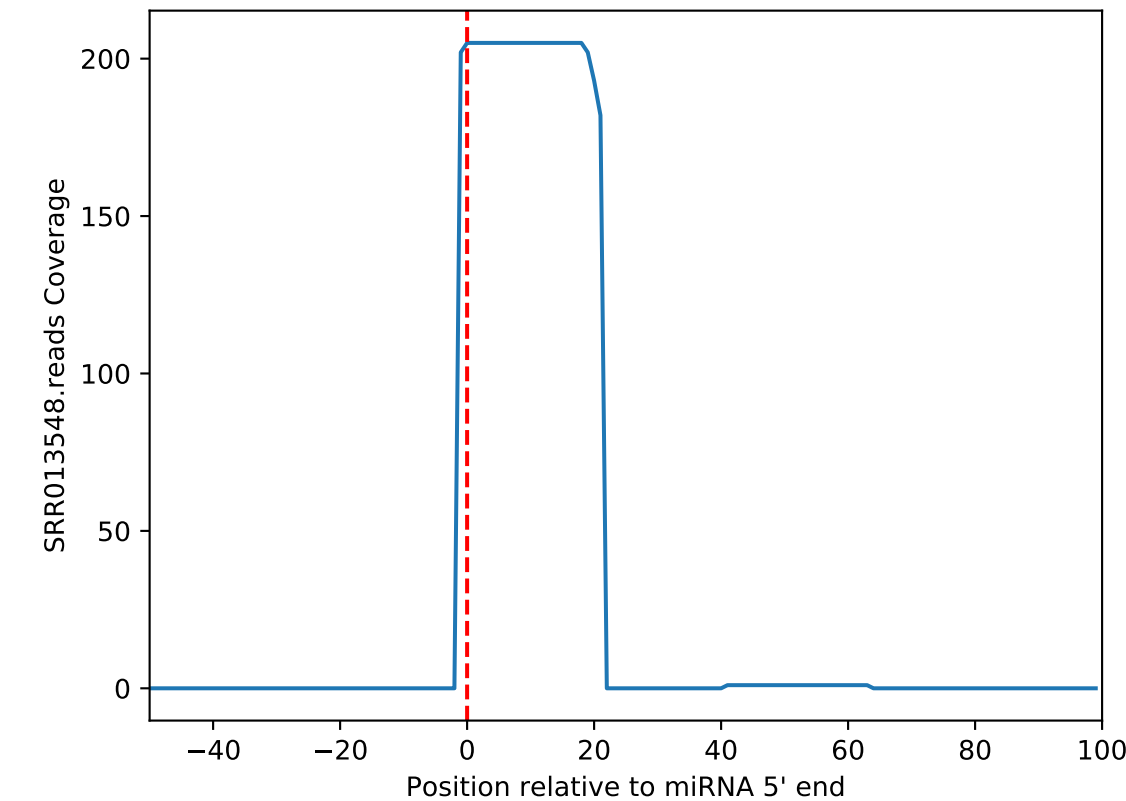

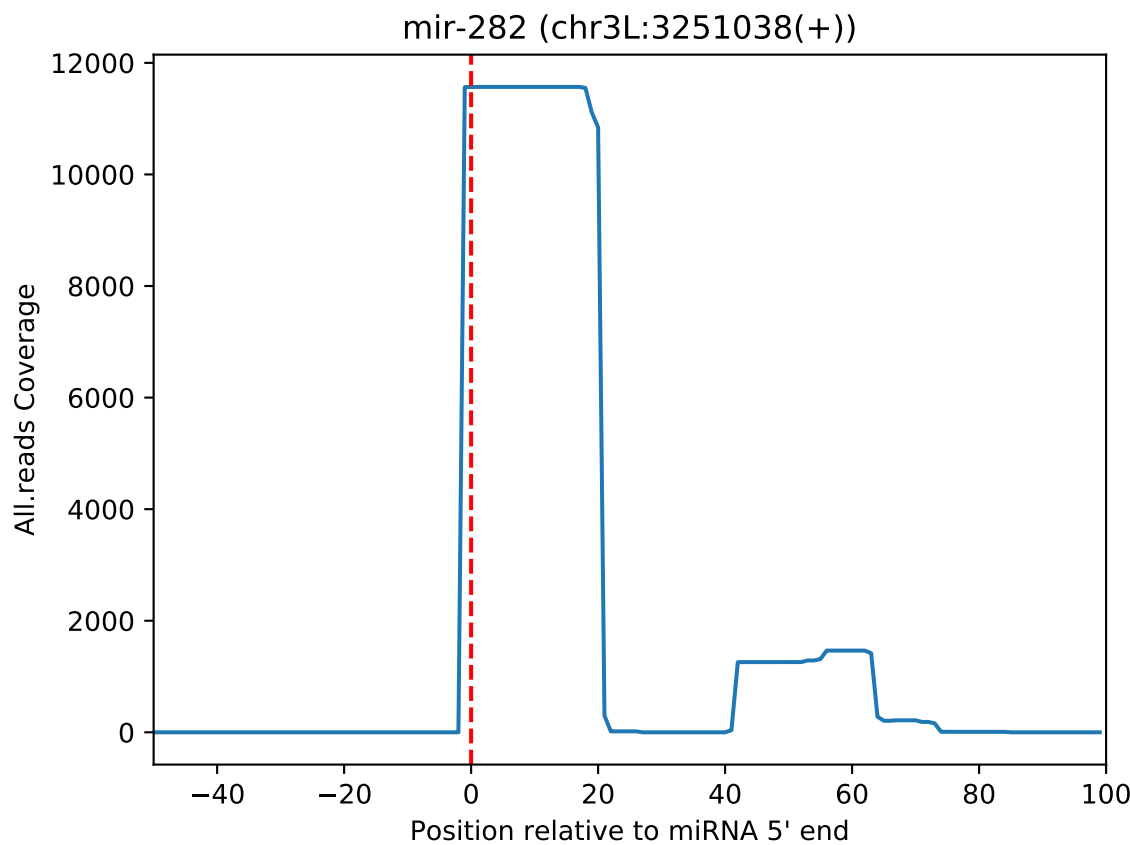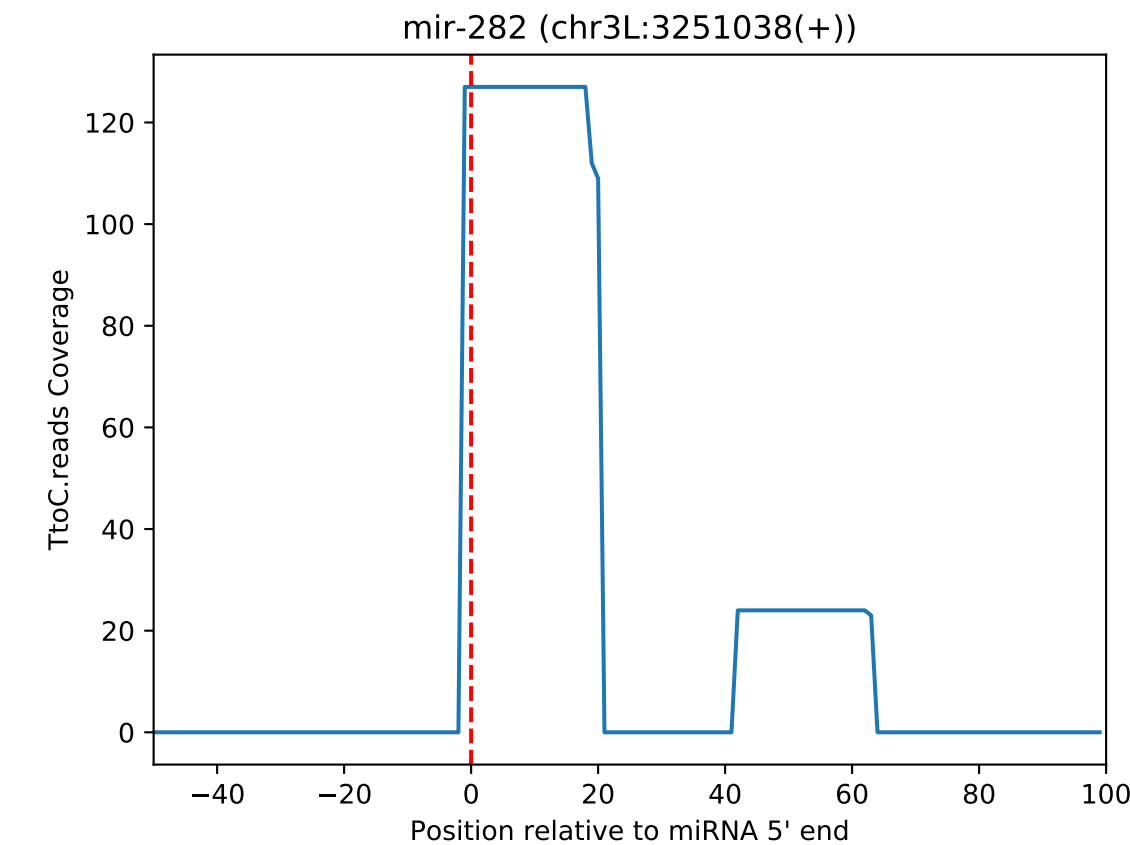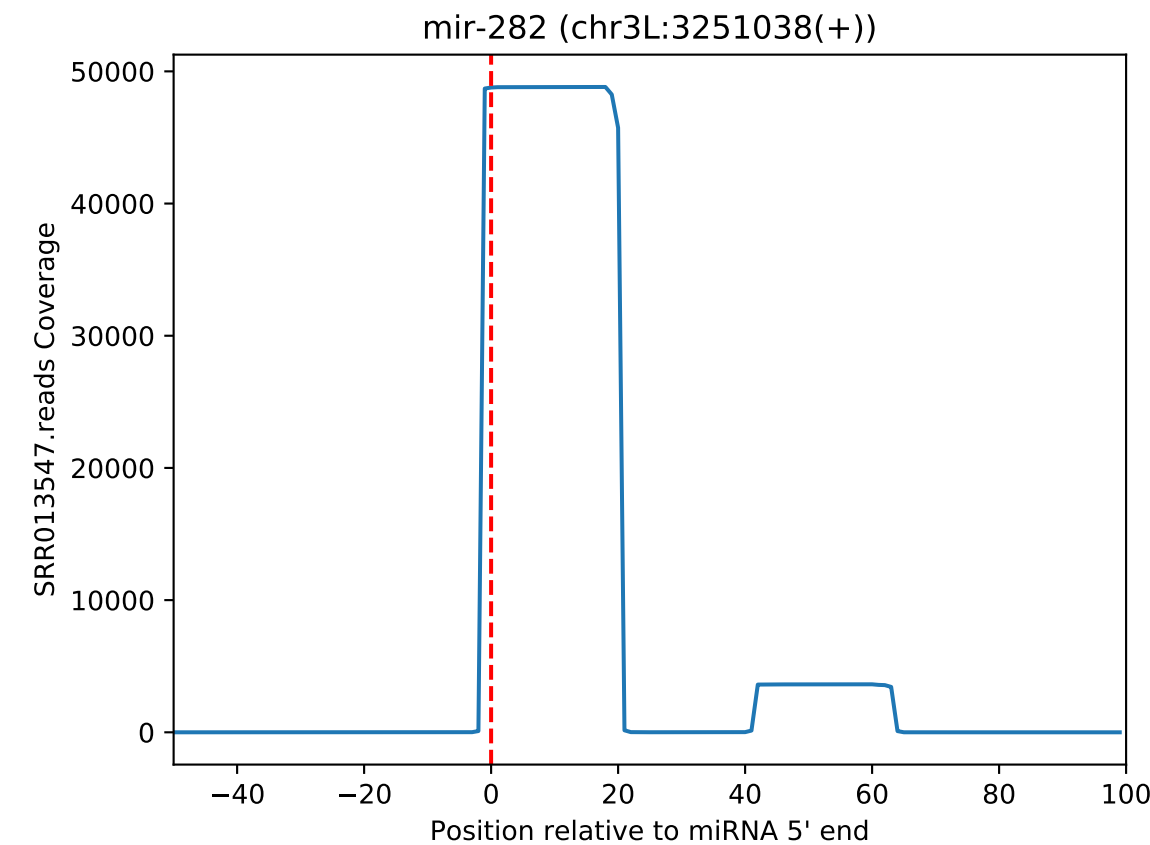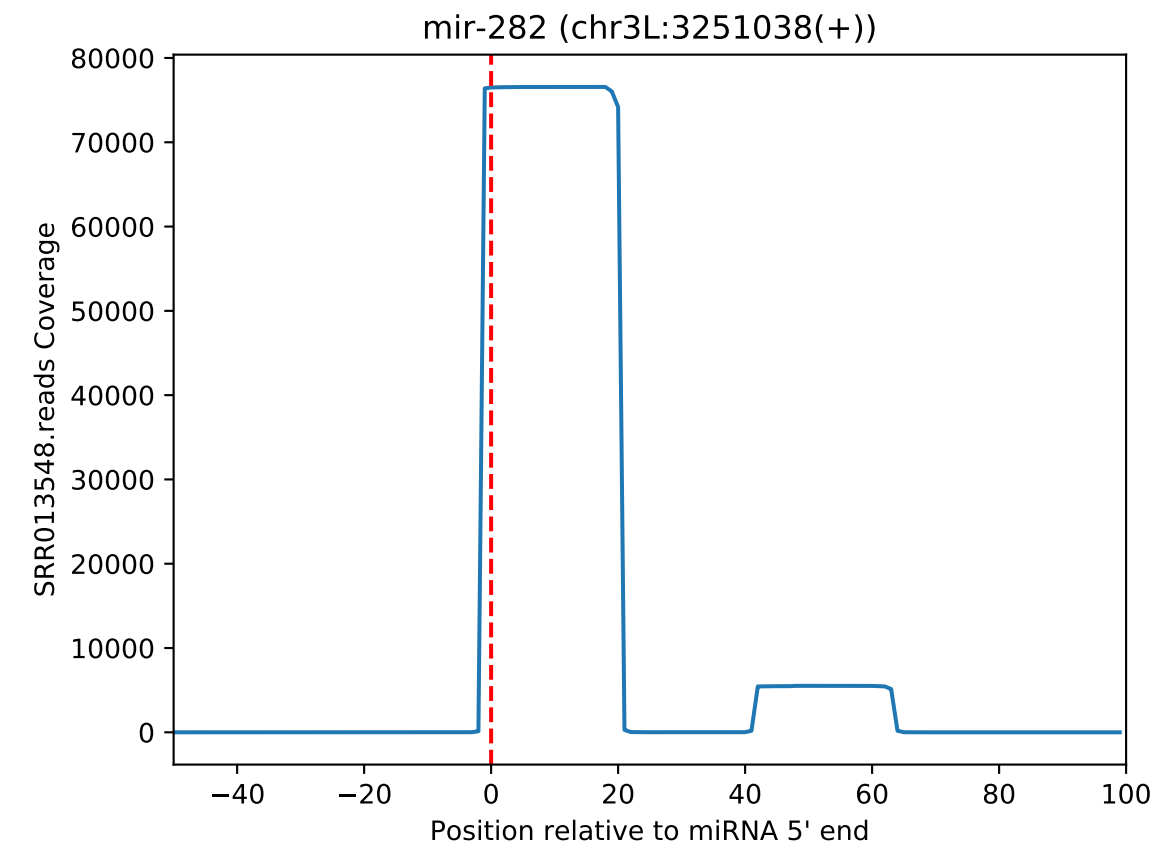

mir-2a-1 (chr2L:19569966(-))

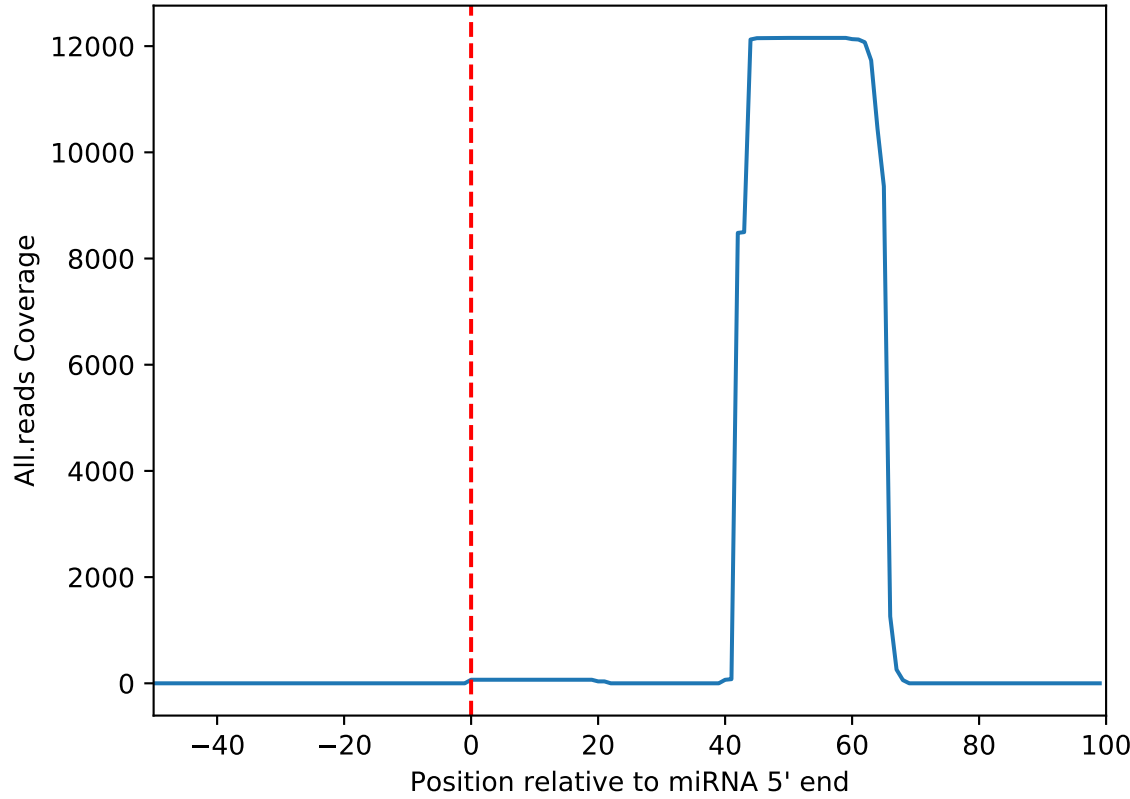

mir-2a-1 (chr2L:19569966(-))

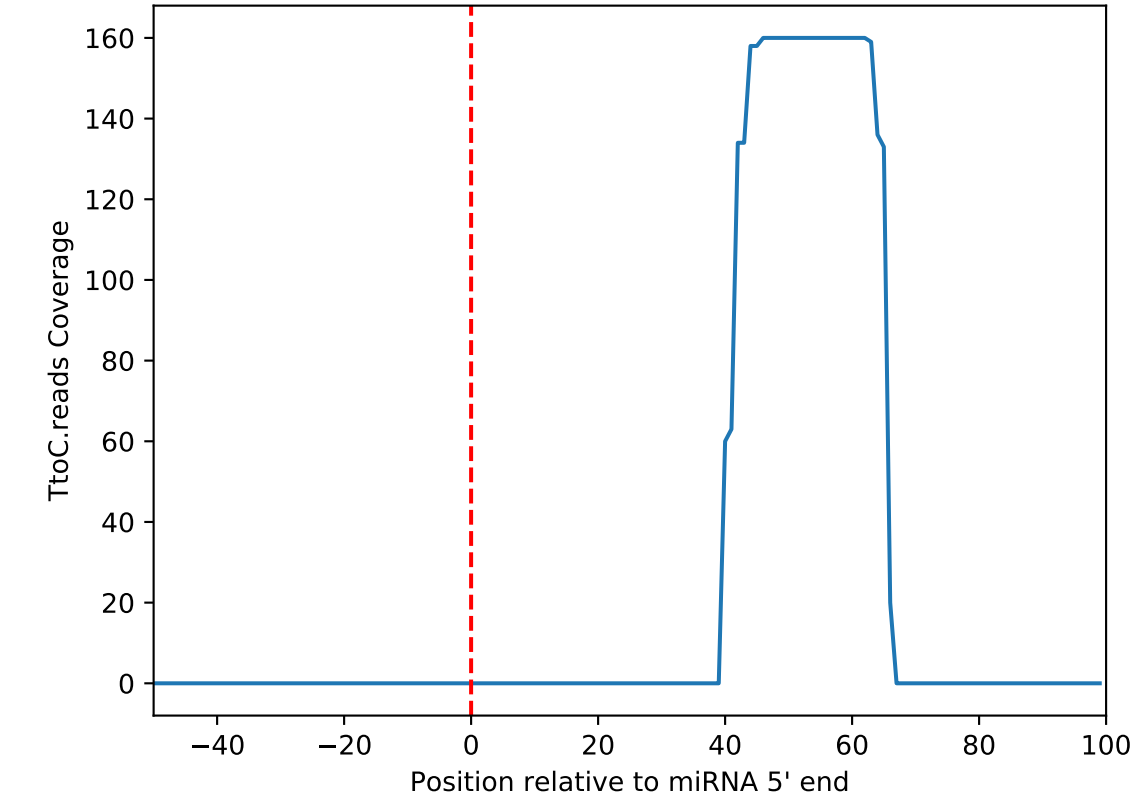

mir-2a-1 (chr2L:19569966(-))

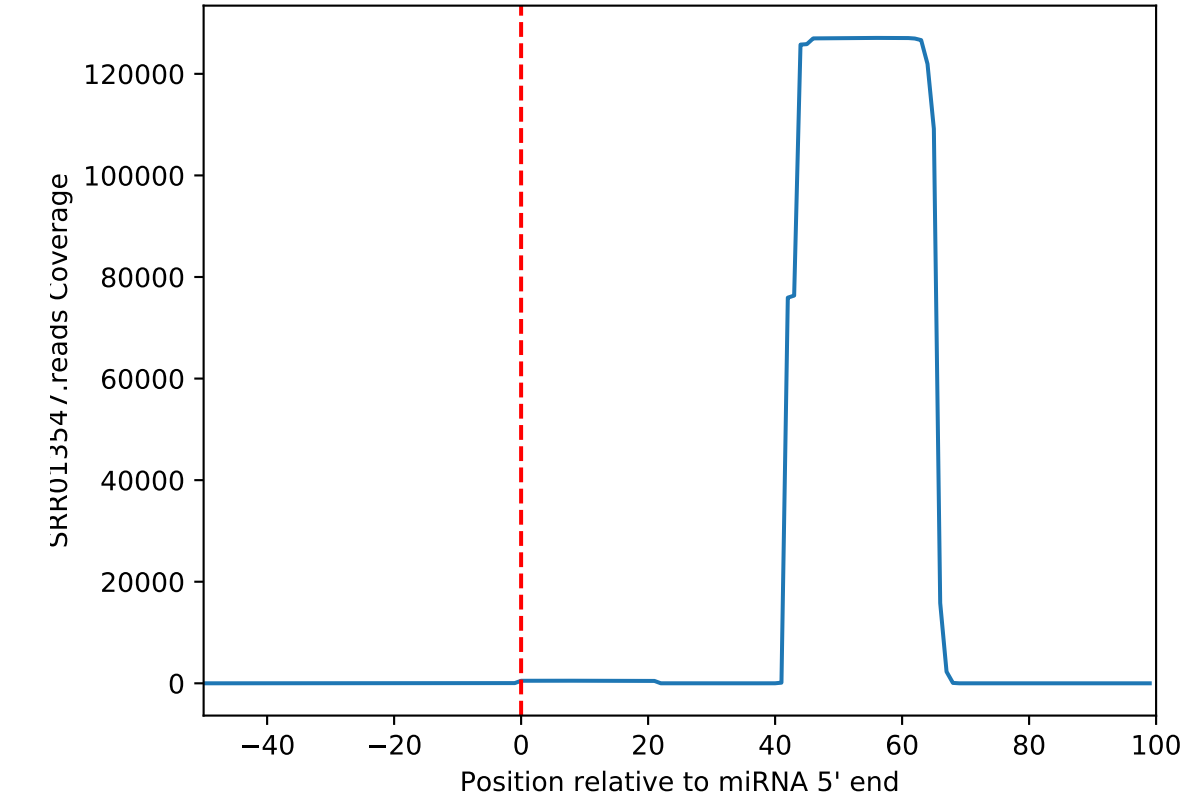

mir-2a-1 (chr2L:19569966(-))

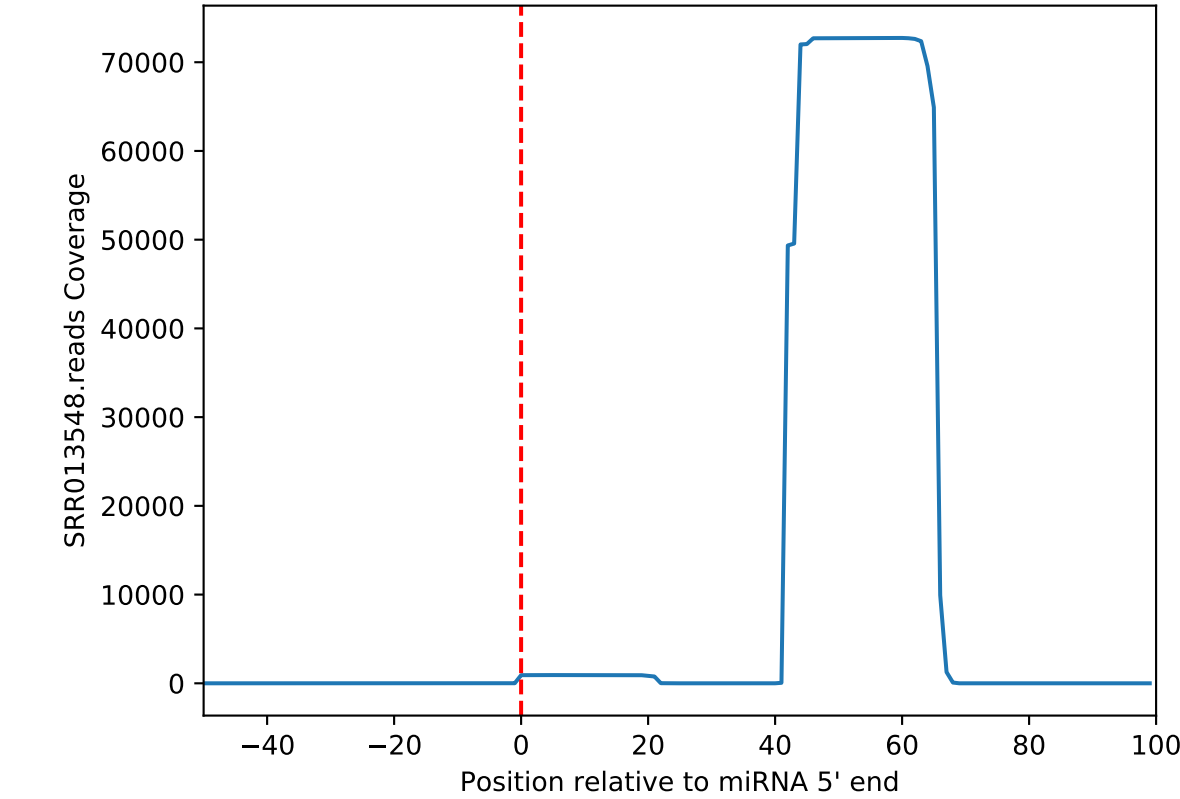

mir-304 (chrX:15508970(+))

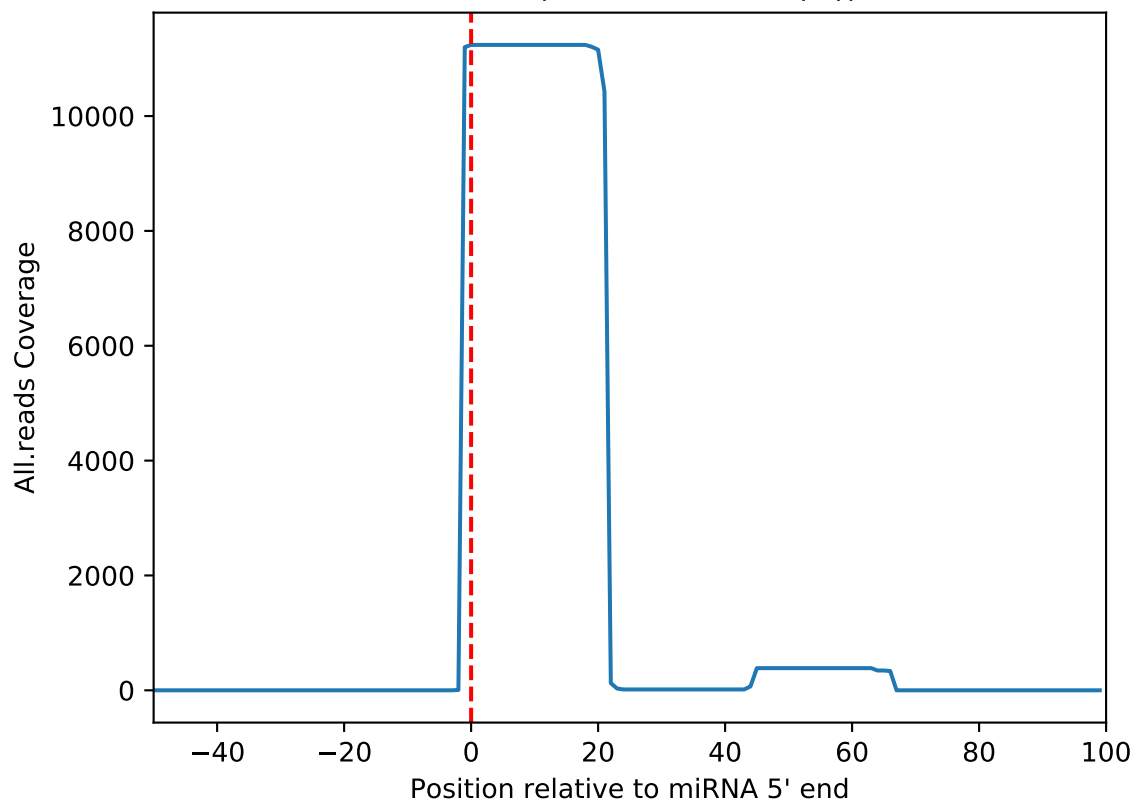

mir-304 (chrX:15508970(+))

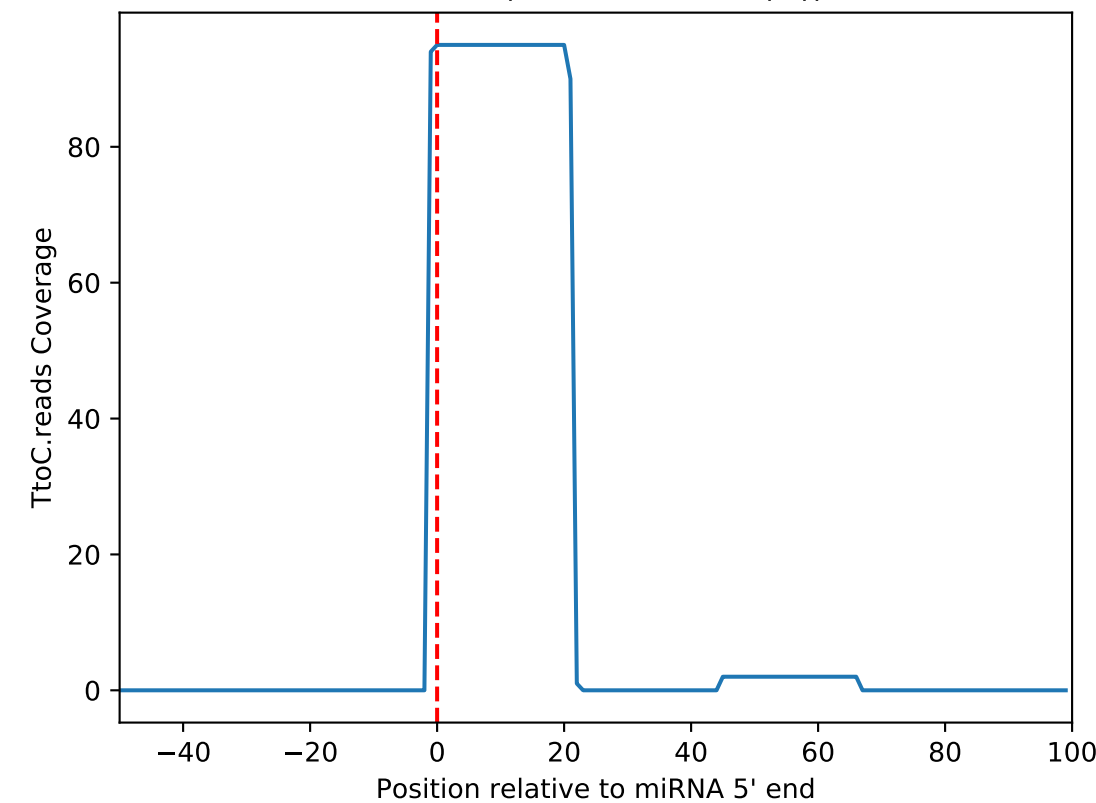

mir-304 (chrX:15508970(+))

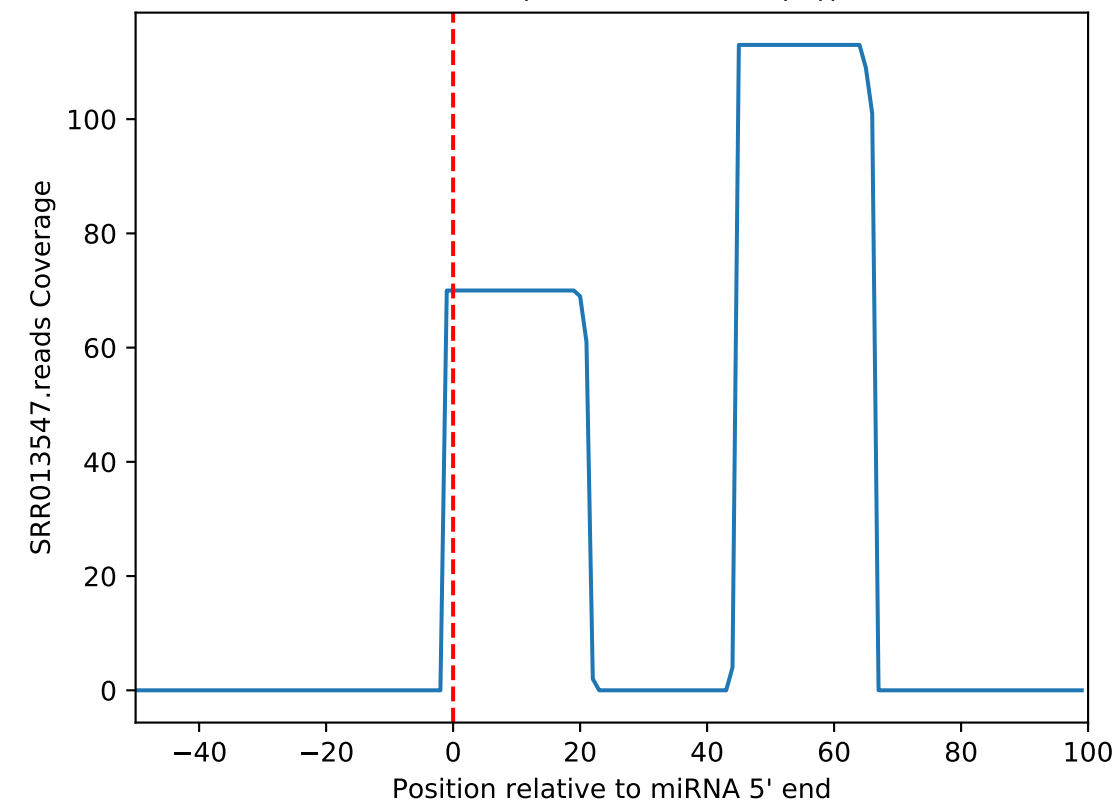

mir-304 (chrX:15508970(+))

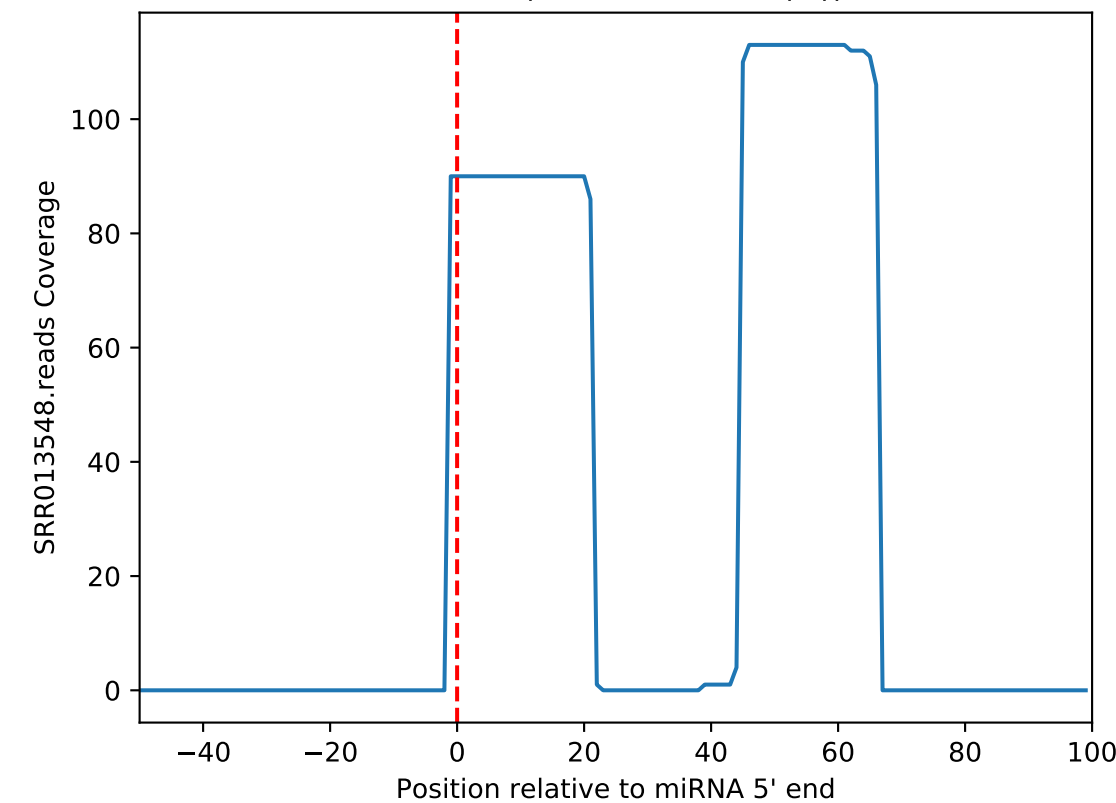



mir-2b-2 (chr2L:19570256(-))

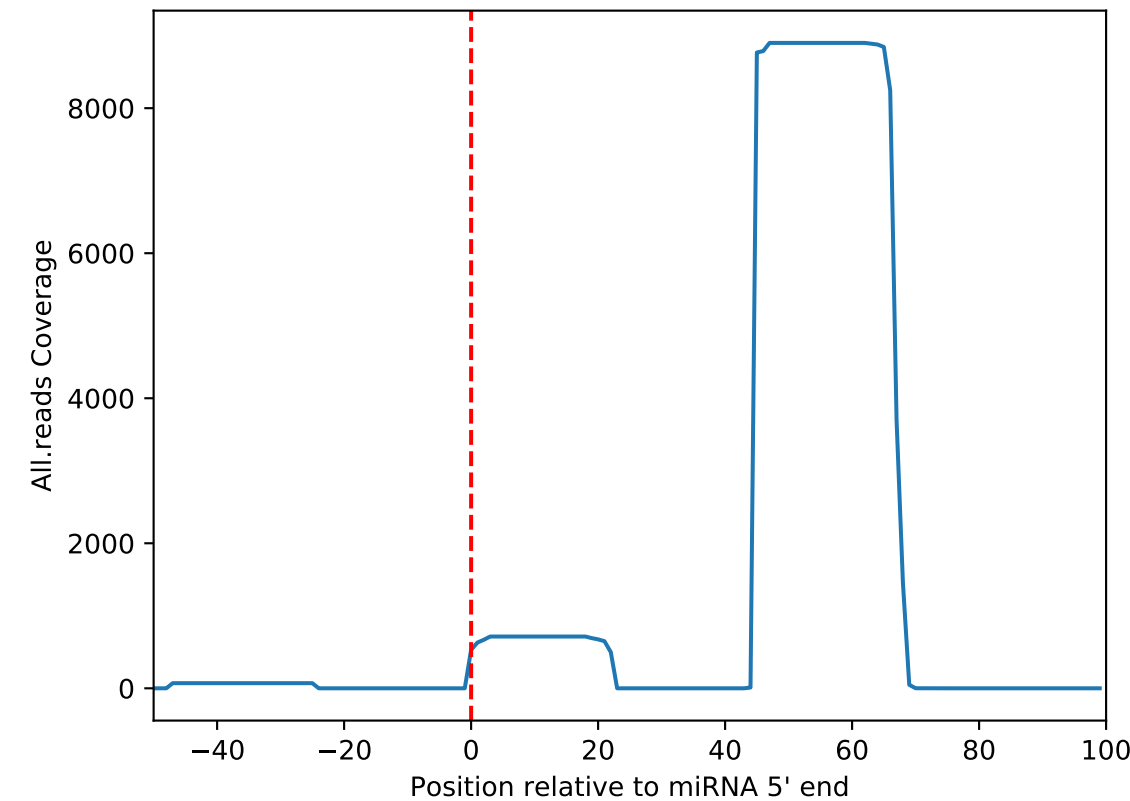

mir-2b-2 (chr2L:19570256(-))

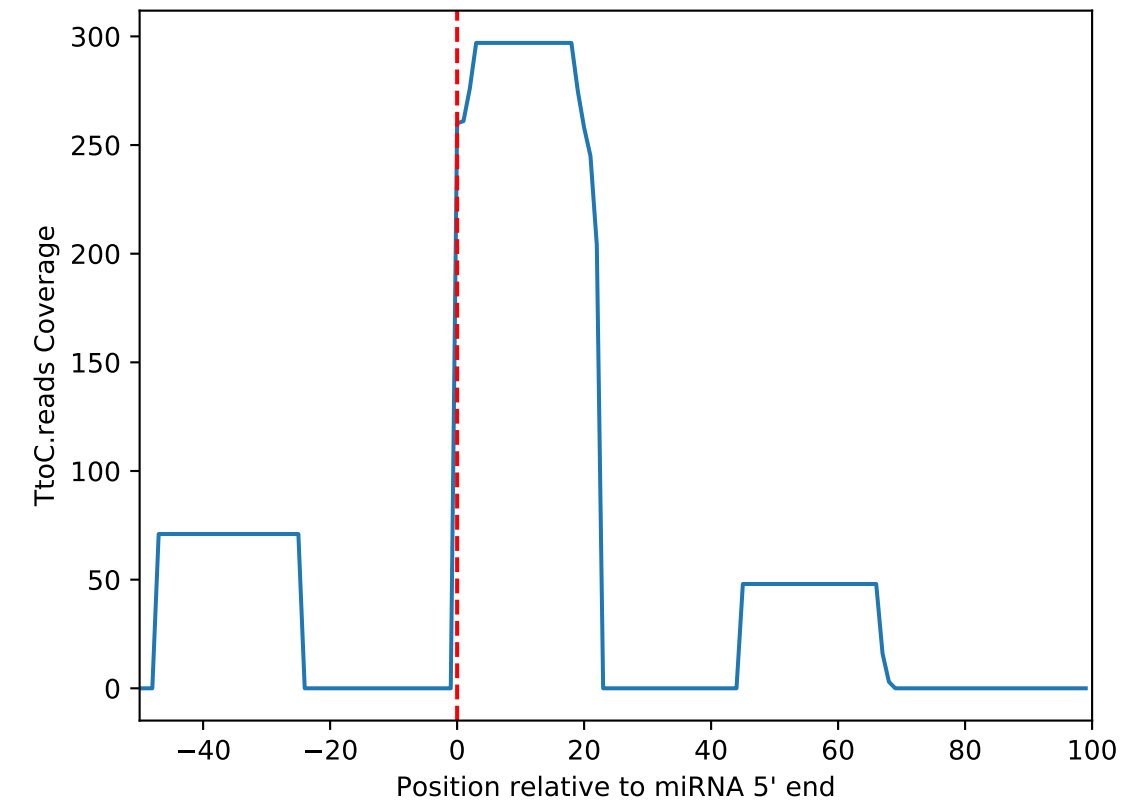

mir-2b-2 (chr2L:19570256(-))

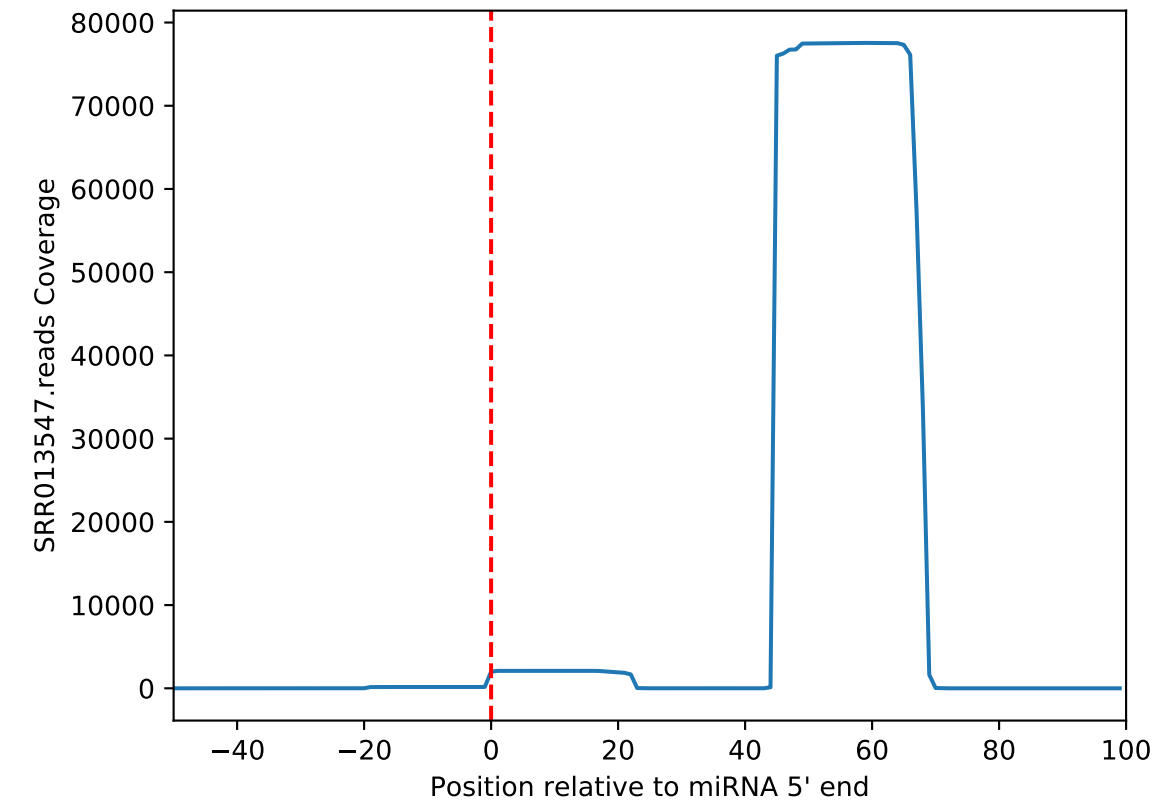

mir-2b-2 (chr2L:19570256(-))

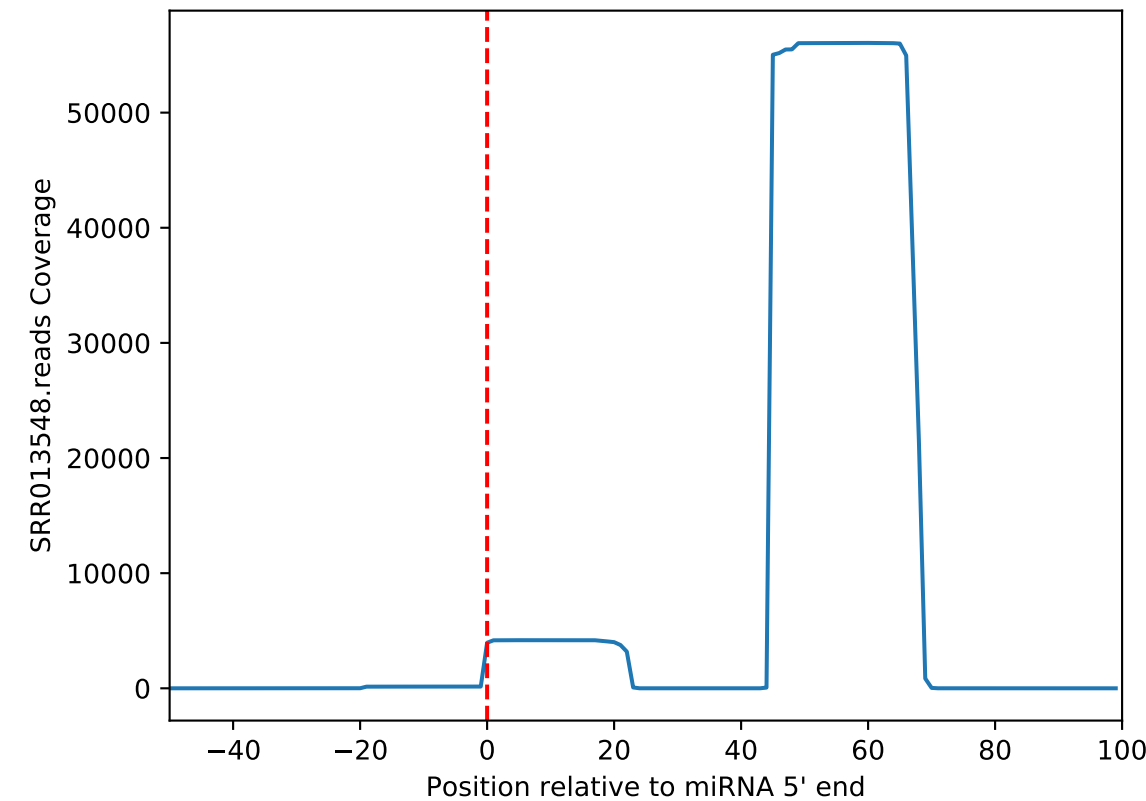

mir-14 (chr2R:9553765(+))

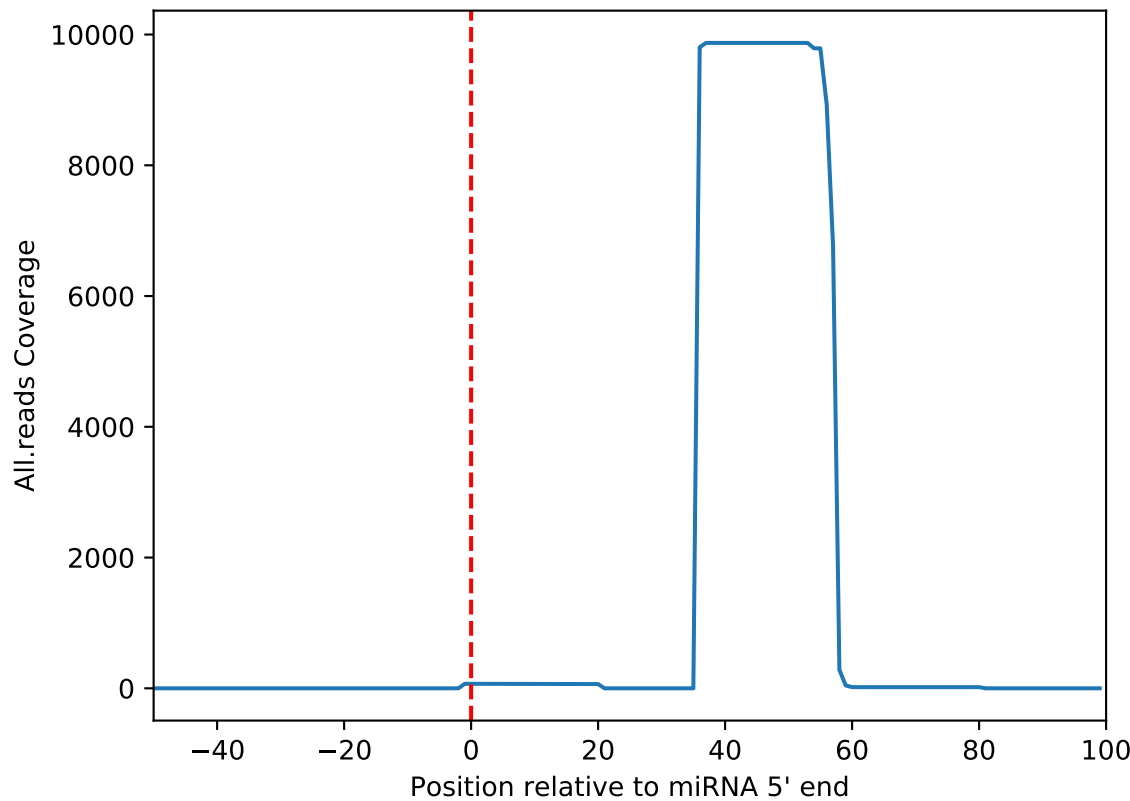

mir-14 (chr2R:9553765(+))

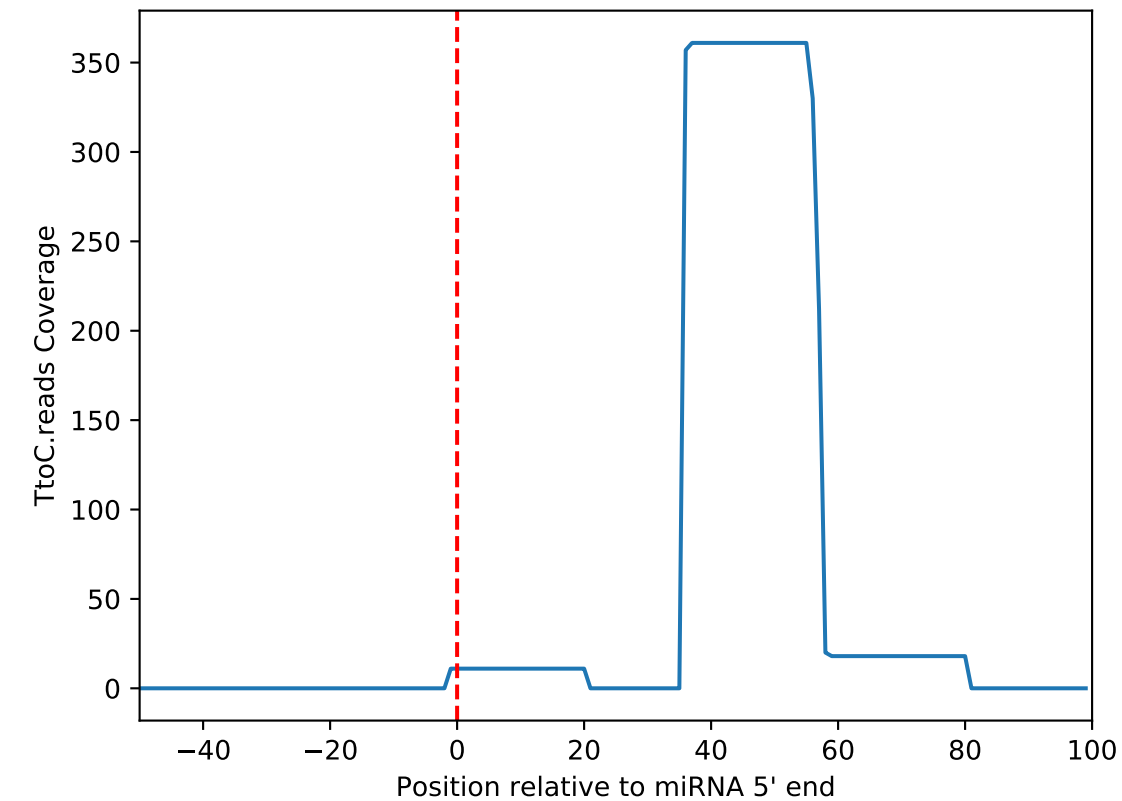

mir-14 (chr2R:9553765(+))

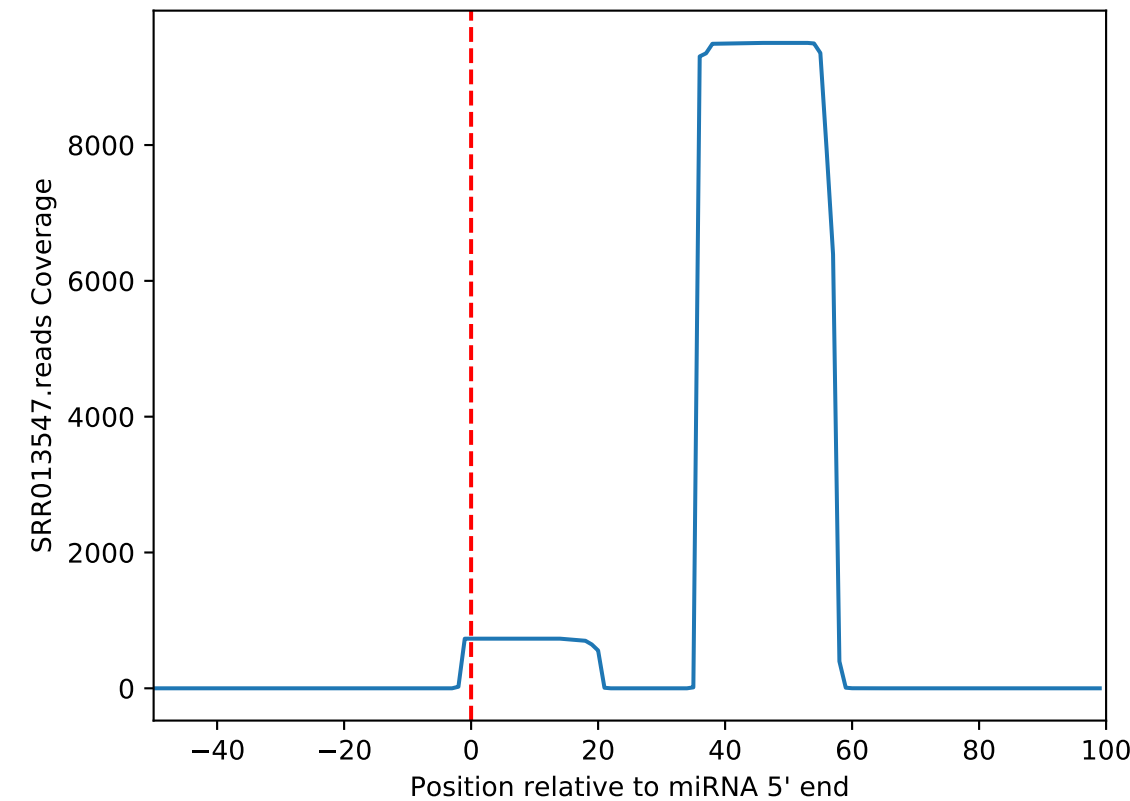

mir-14 (chr2R:9553765(+))

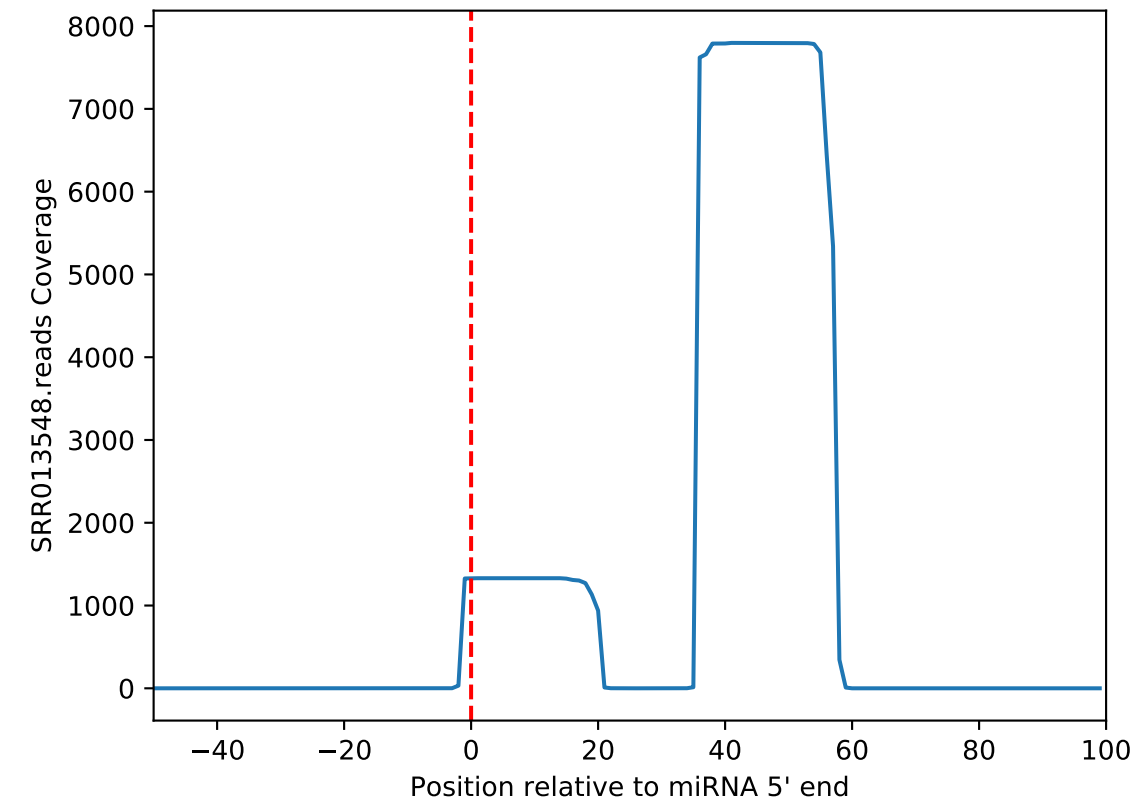

mir-2b-1 (chr2L:8258684(-))

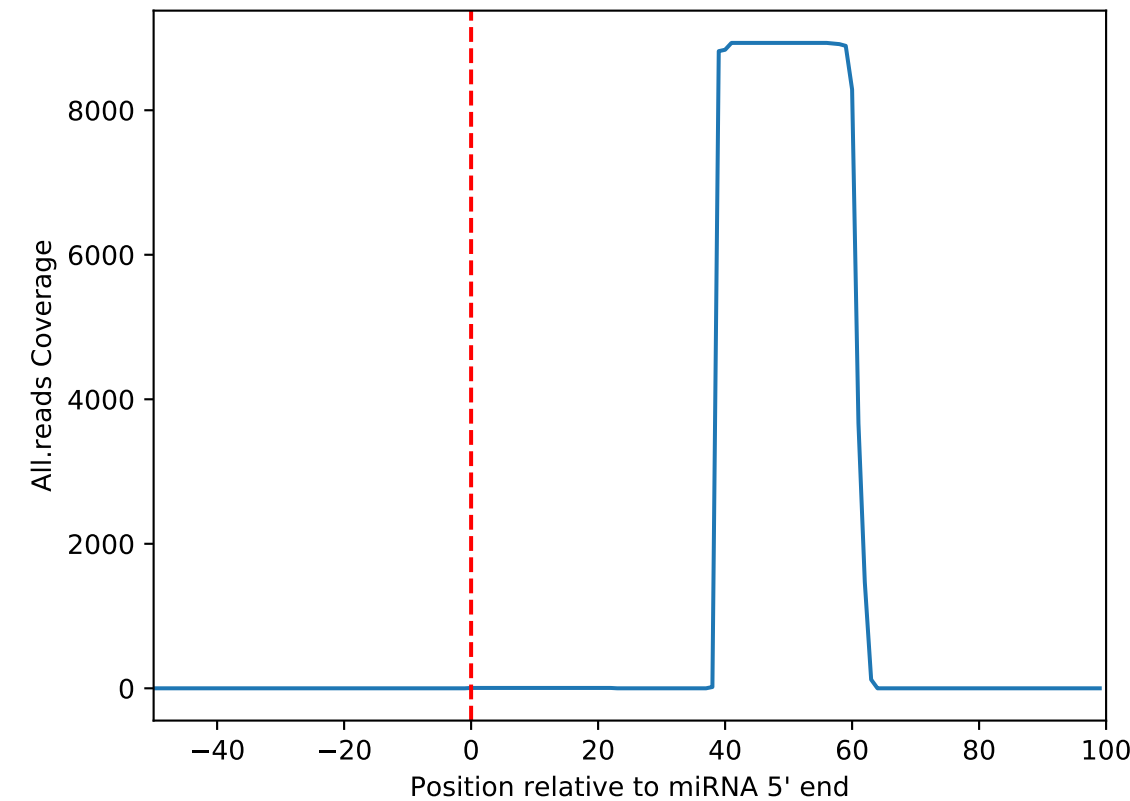

mir-2b-1 (chr2L:8258684(-))

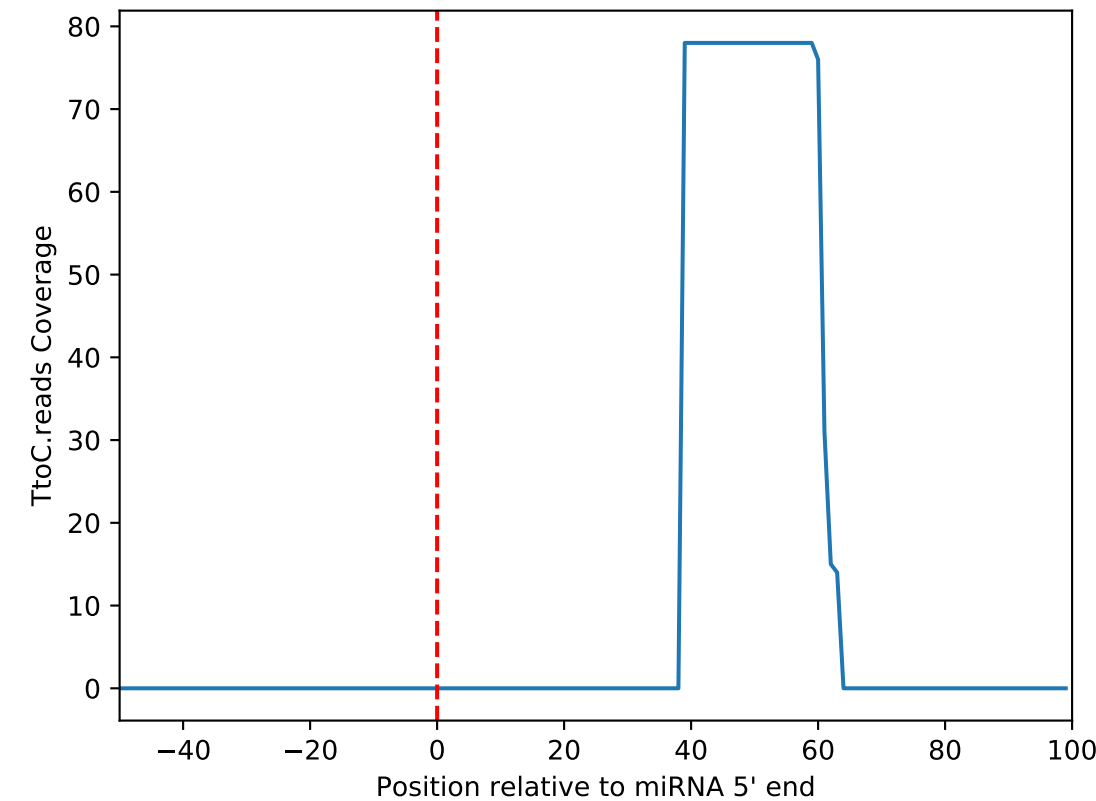

mir-2b-1 (chr2L:8258684(-))

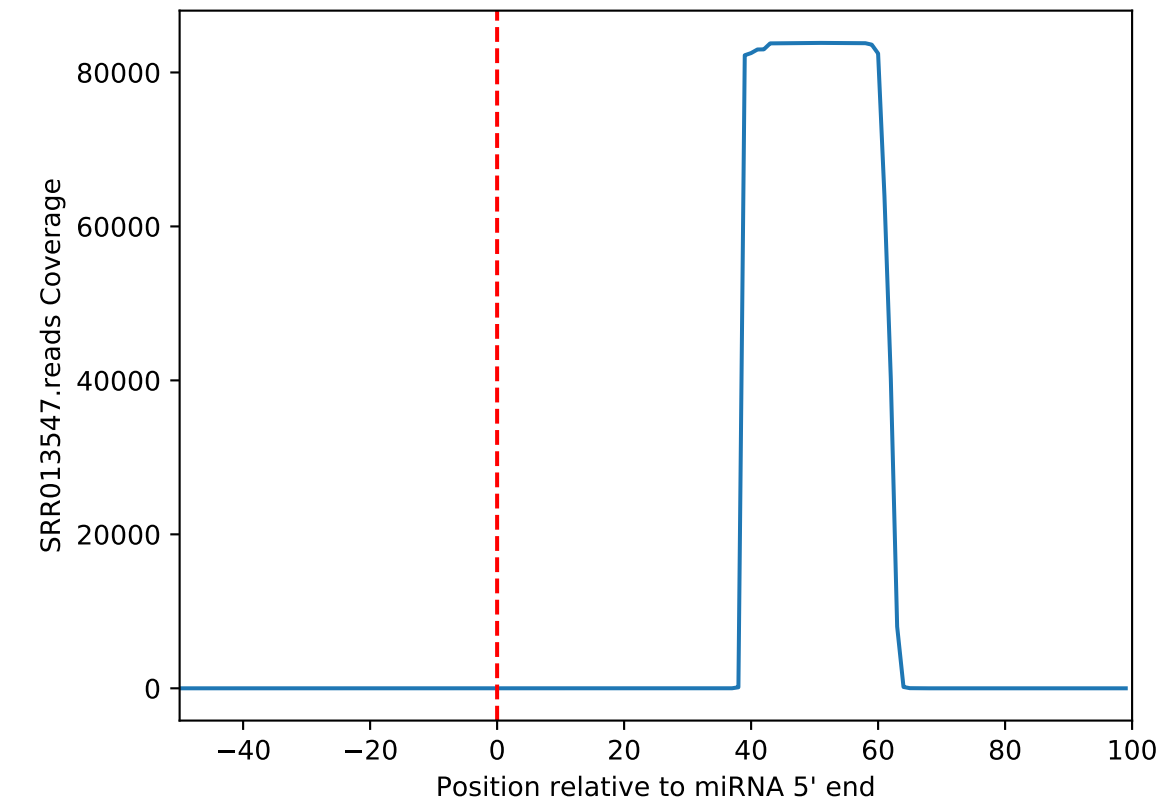

mir-2b-1 (chr2L:8258684(-))

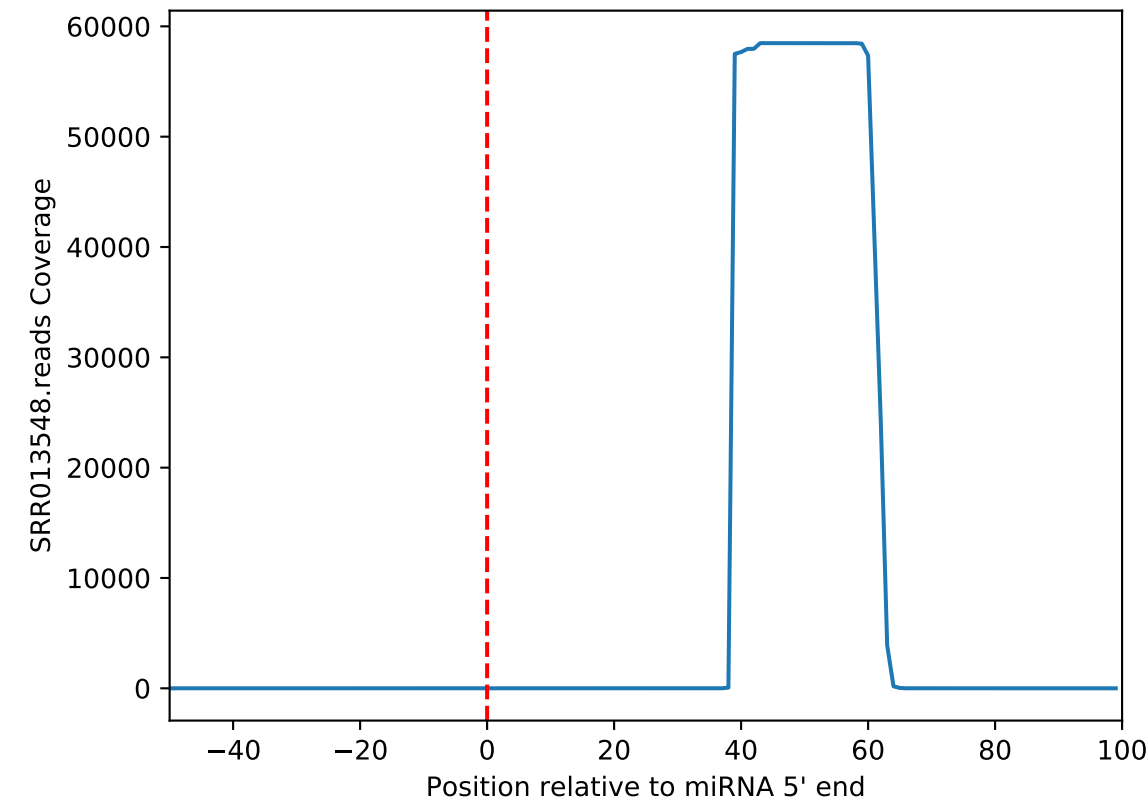

mir-184 (chr2R:13329480(-))

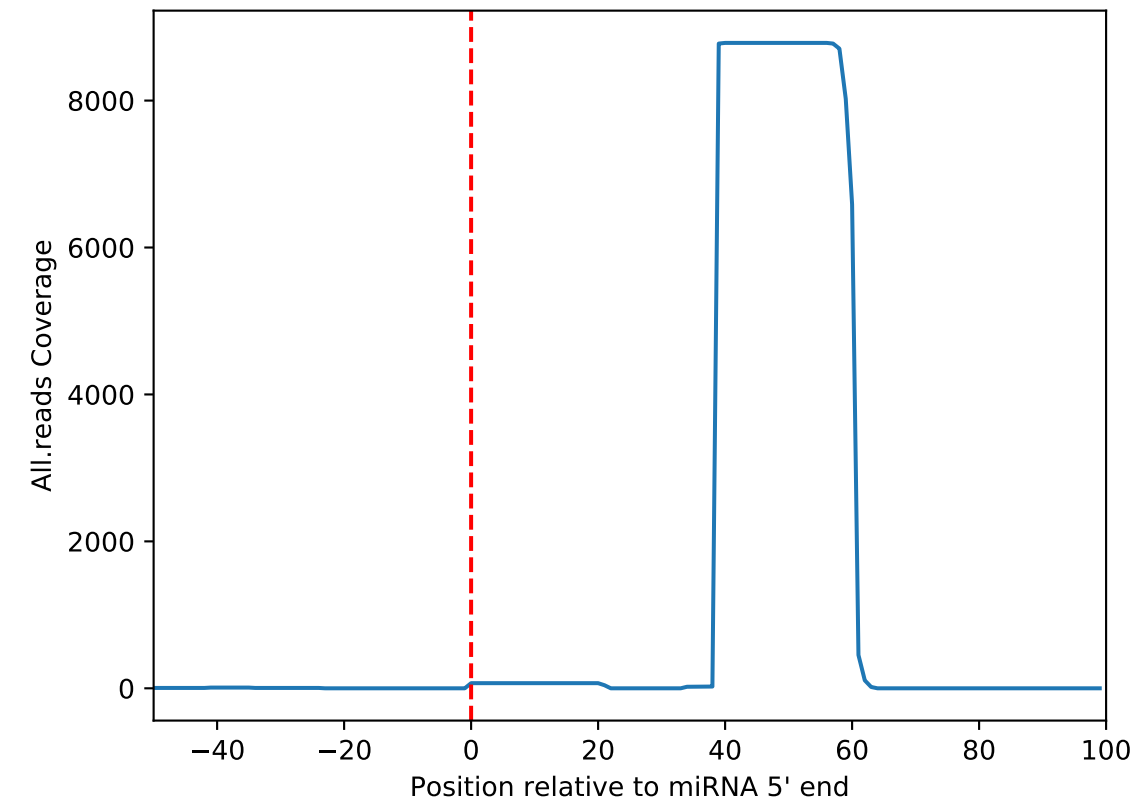

mir-184 (chr2R:13329480(-))

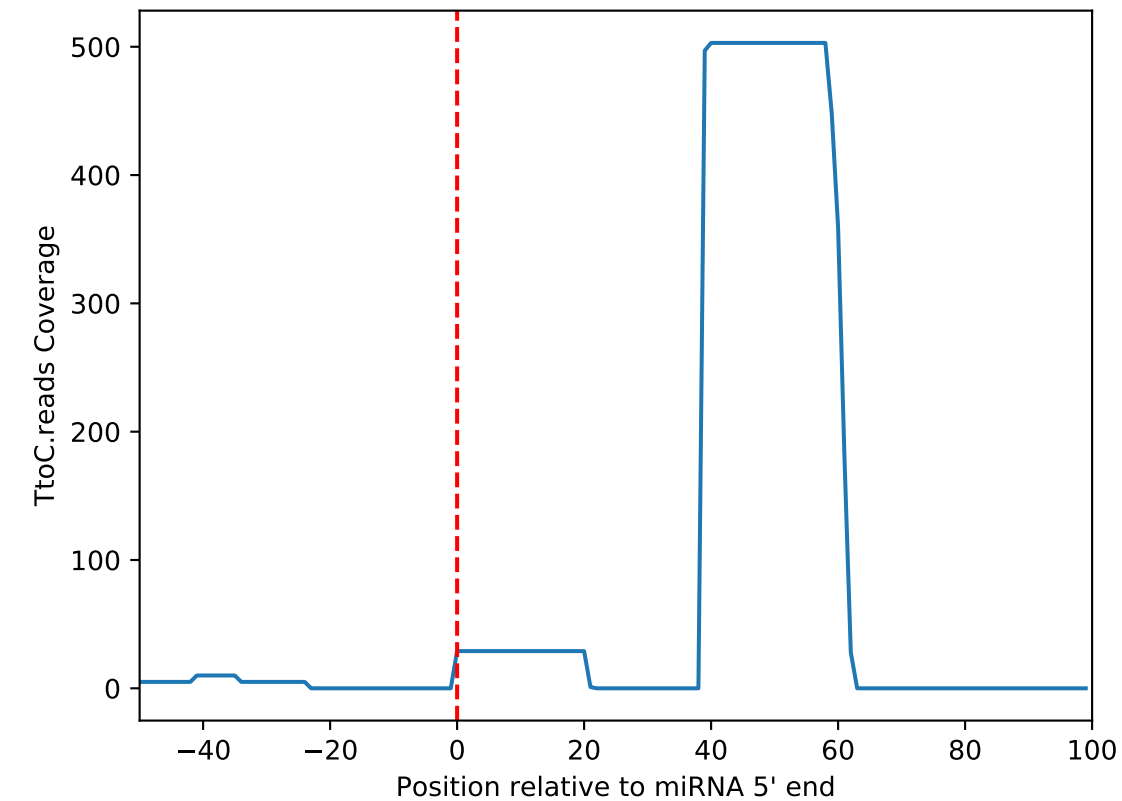

mir-184 (chr2R:13329480(-))

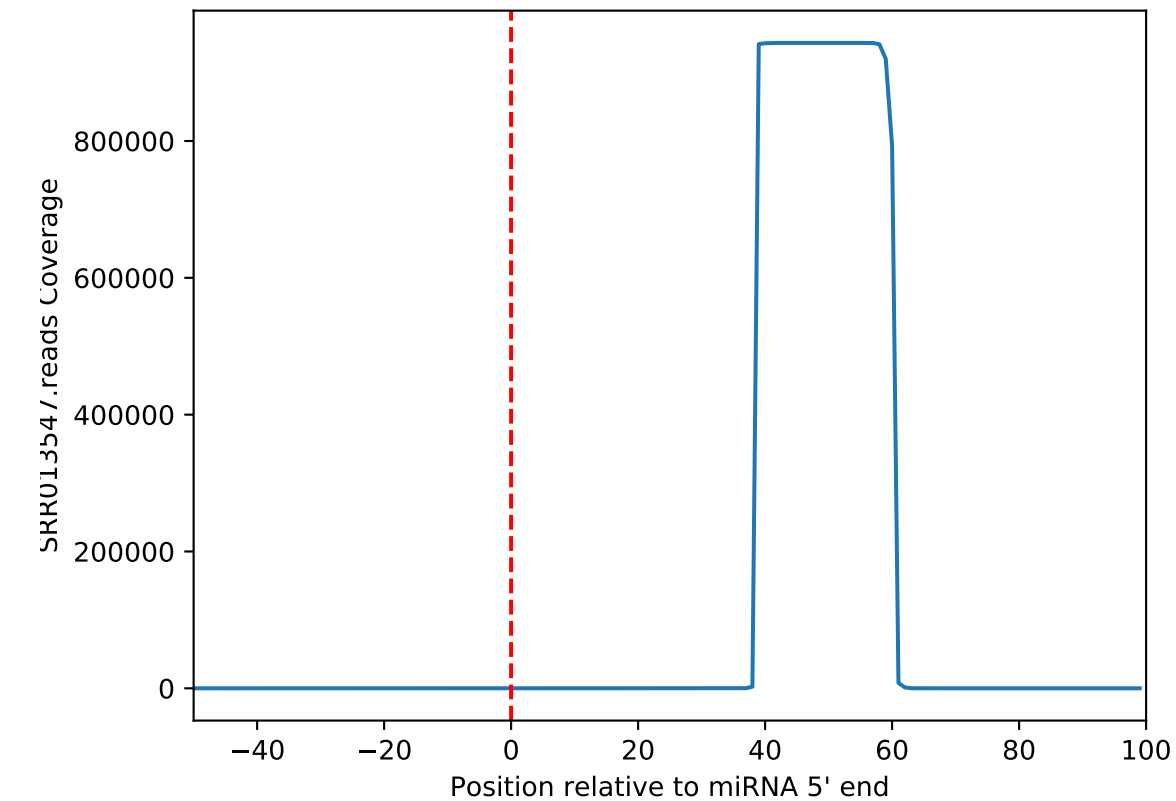

mir-184 (chr2R:13329480(-))

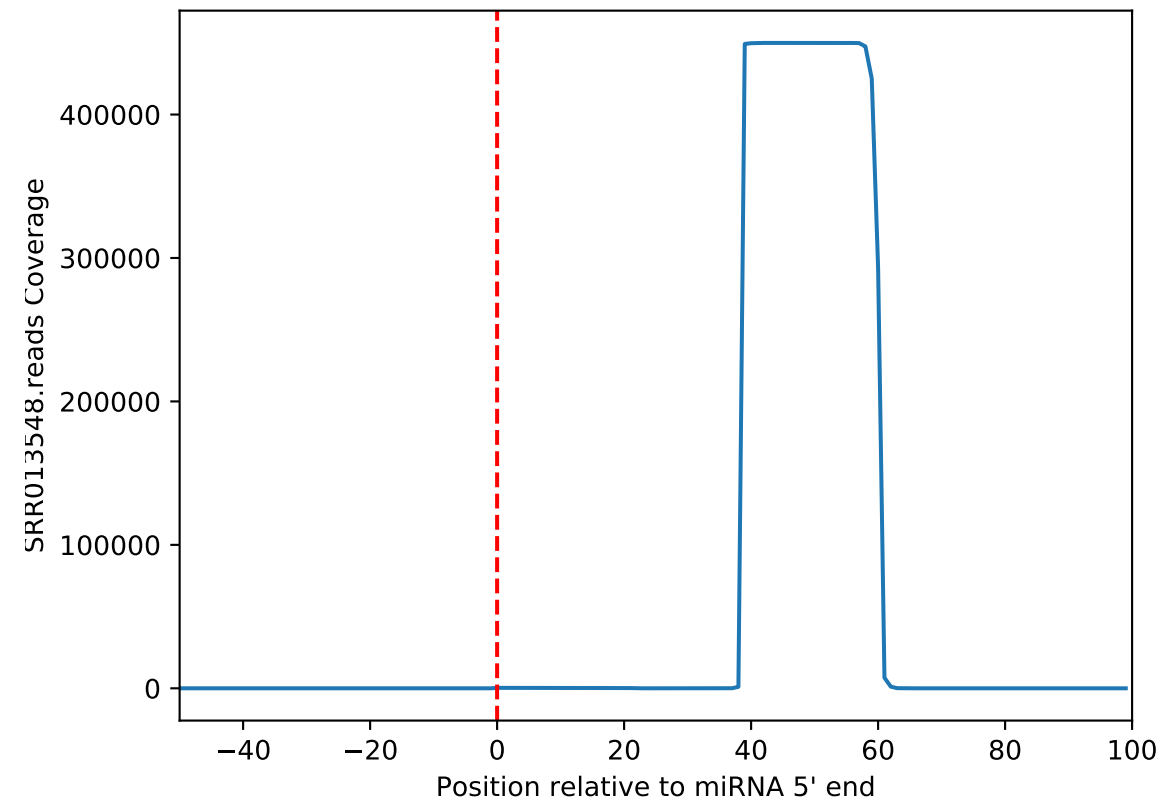

mir-11 (chr3R:21622563(-))

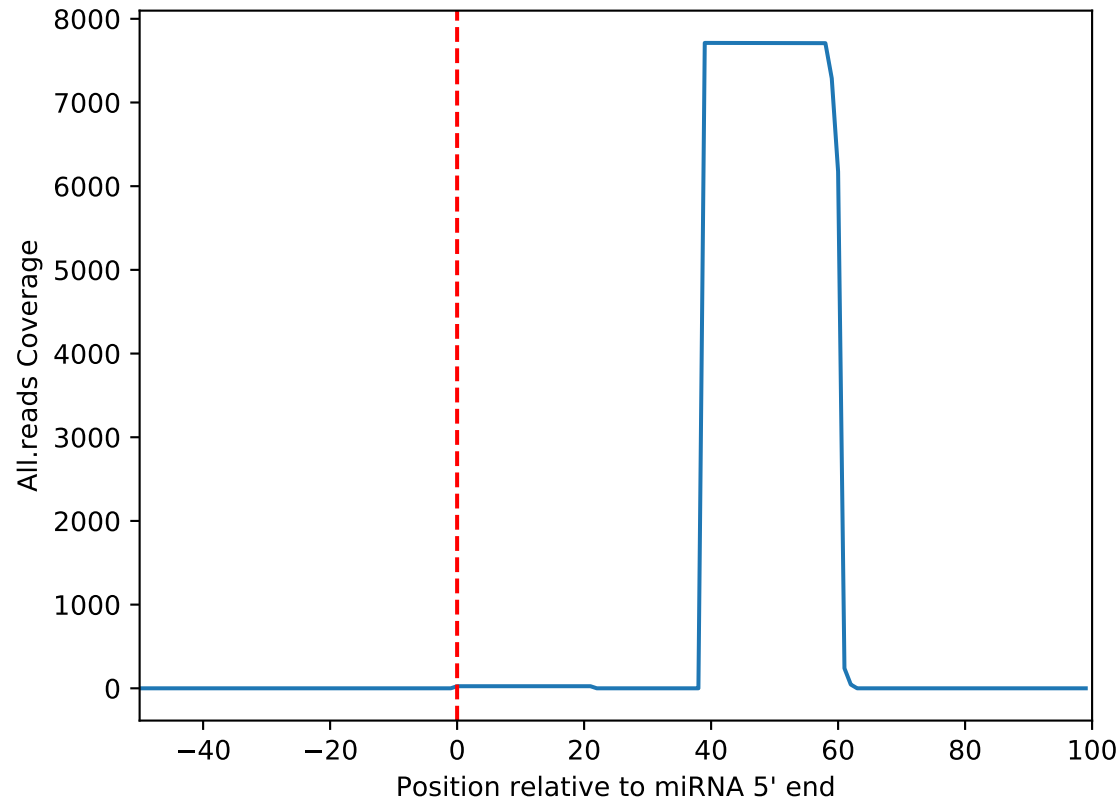

mir-11 (chr3R:21622563(-))

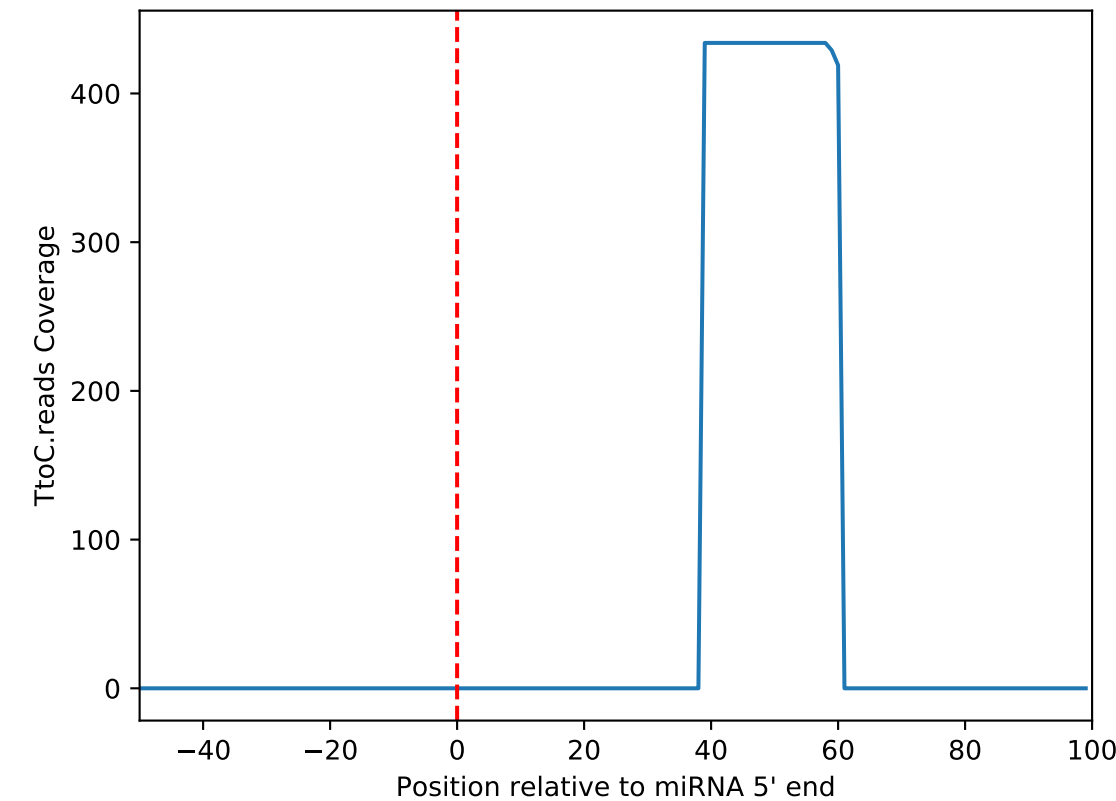

mir-11 (chr3R:21622563(-))

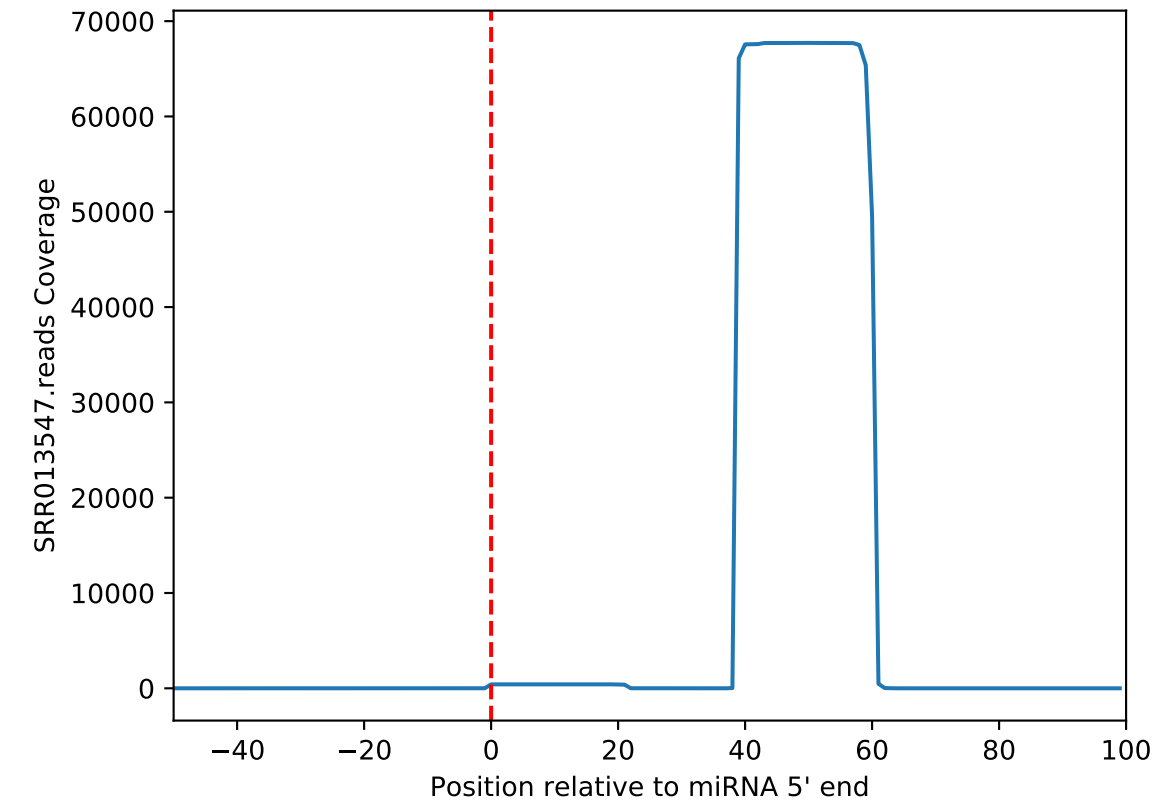

mir-11 (chr3R:21622563(-))

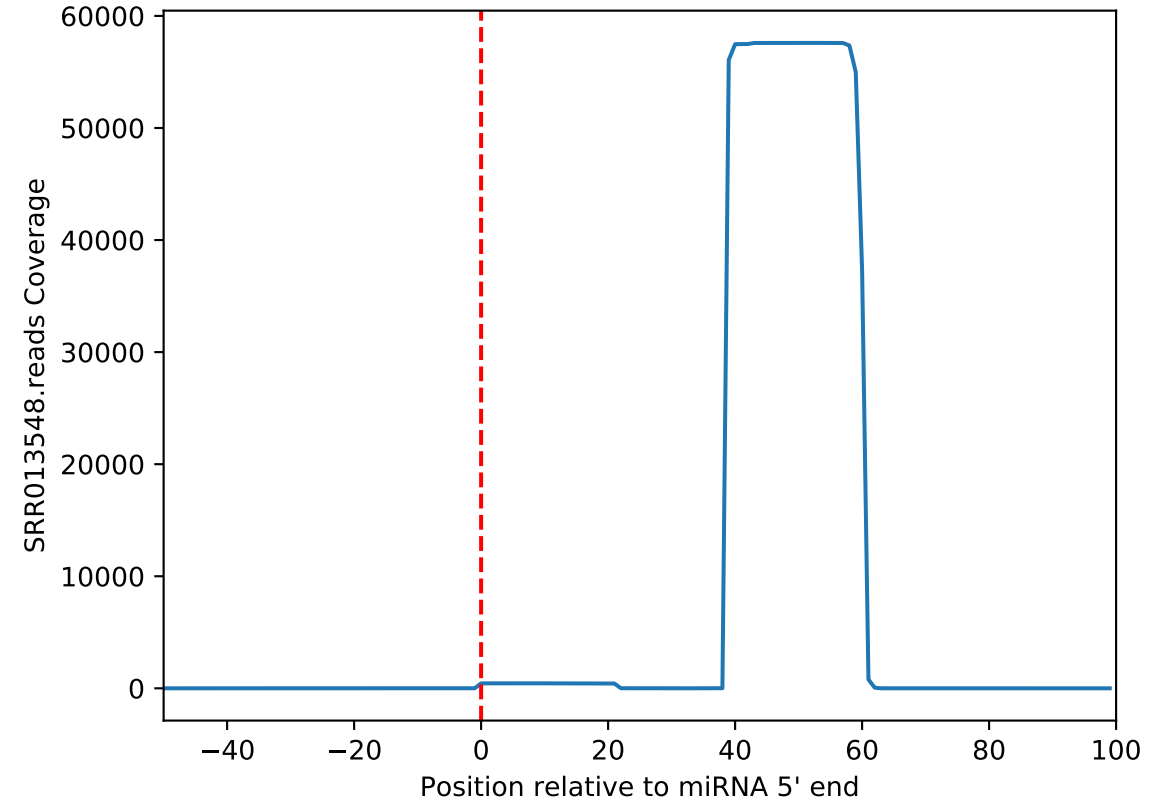

mir-13b-2 (chrX:9091237(+))

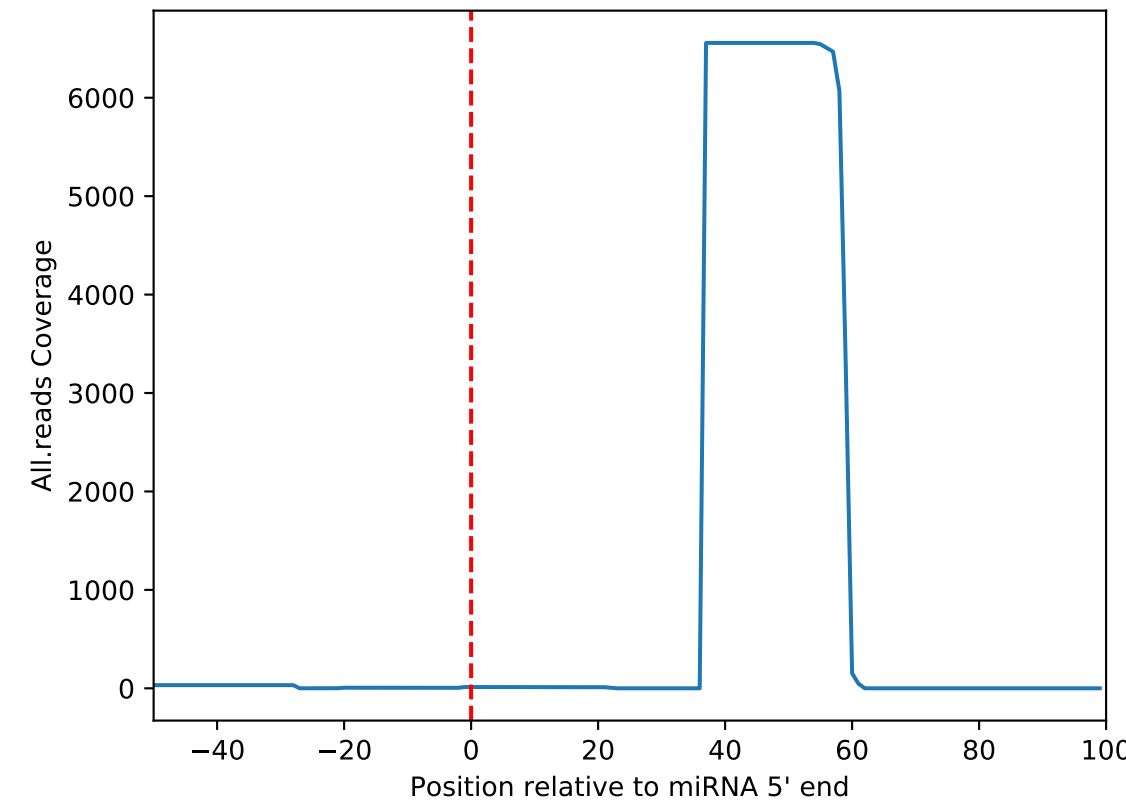

mir-13b-2 (chrX:9091237(+))

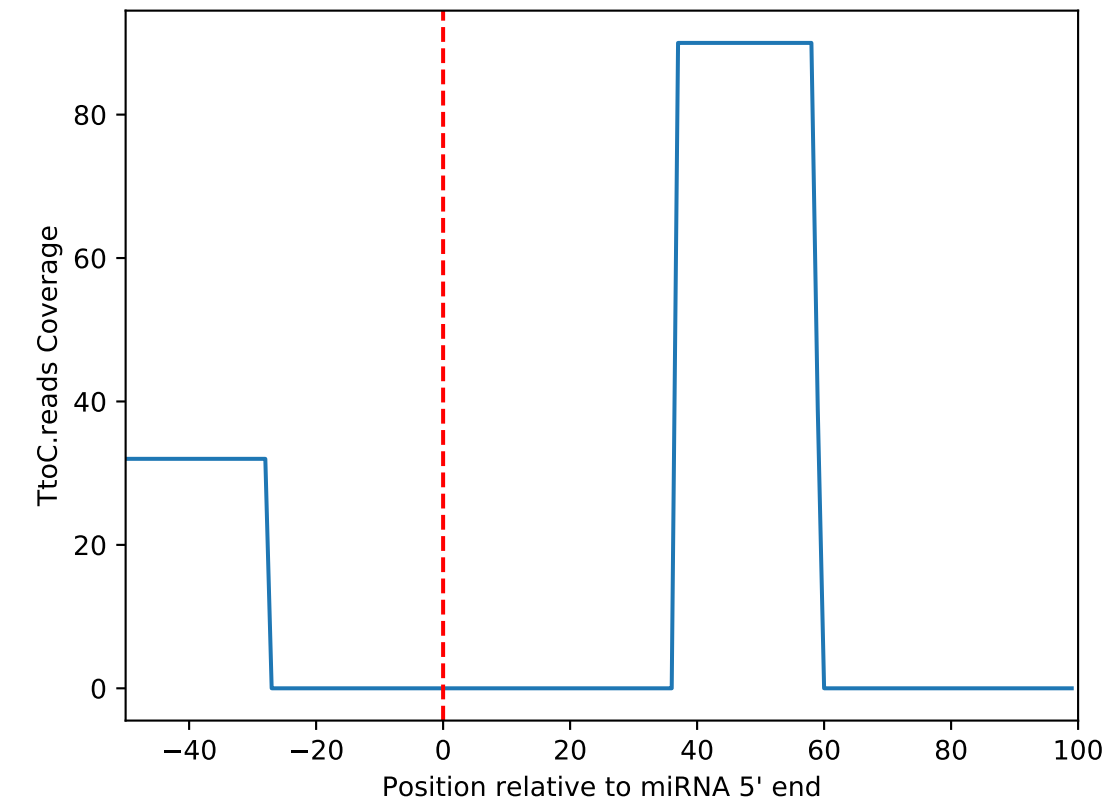

mir-13b-2 (chrX:9091237(+))

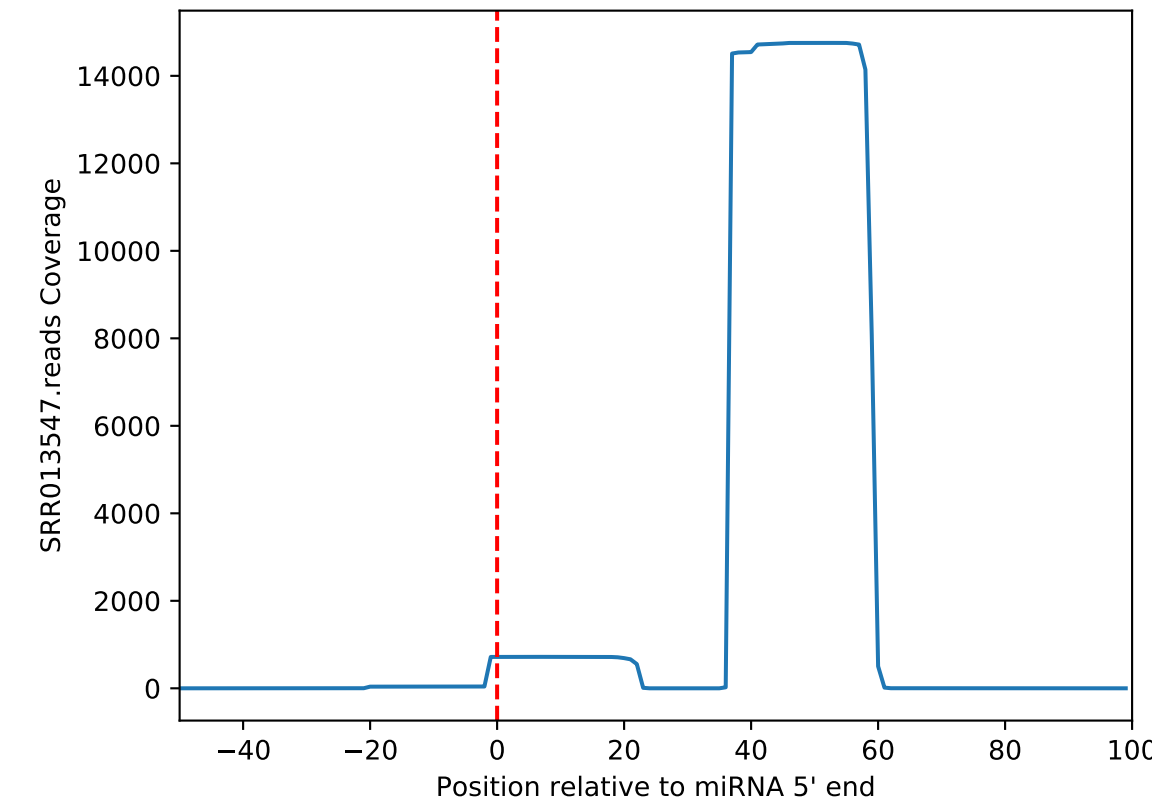

mir-13b-2 (chrX:9091237(+))

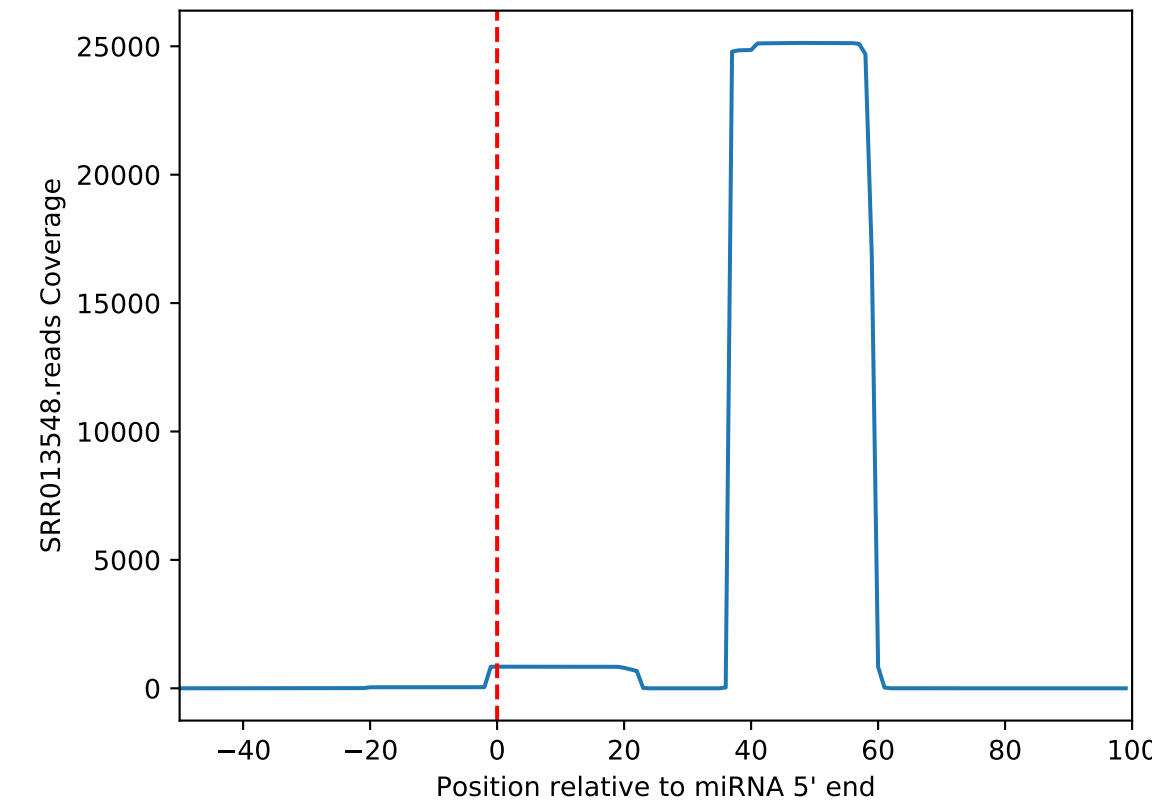

mir-276a (chr3L:10365243(+))

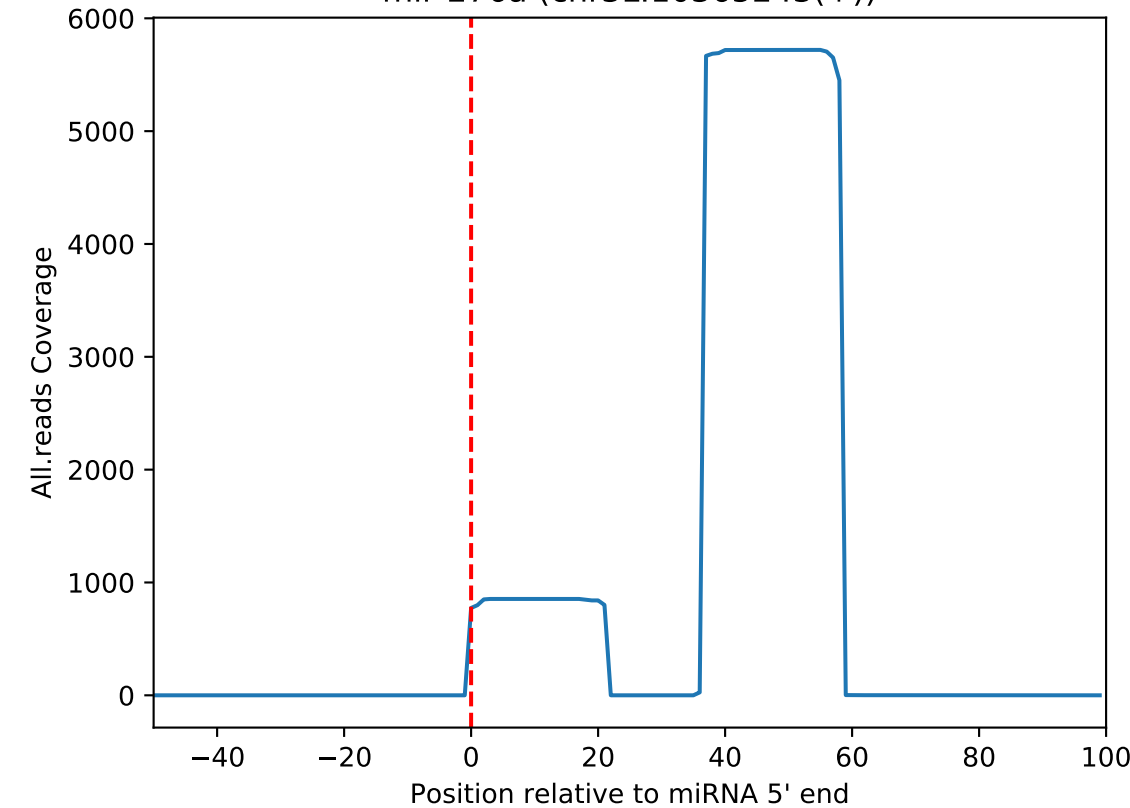

mir-276a (chr3L:10365243(+))

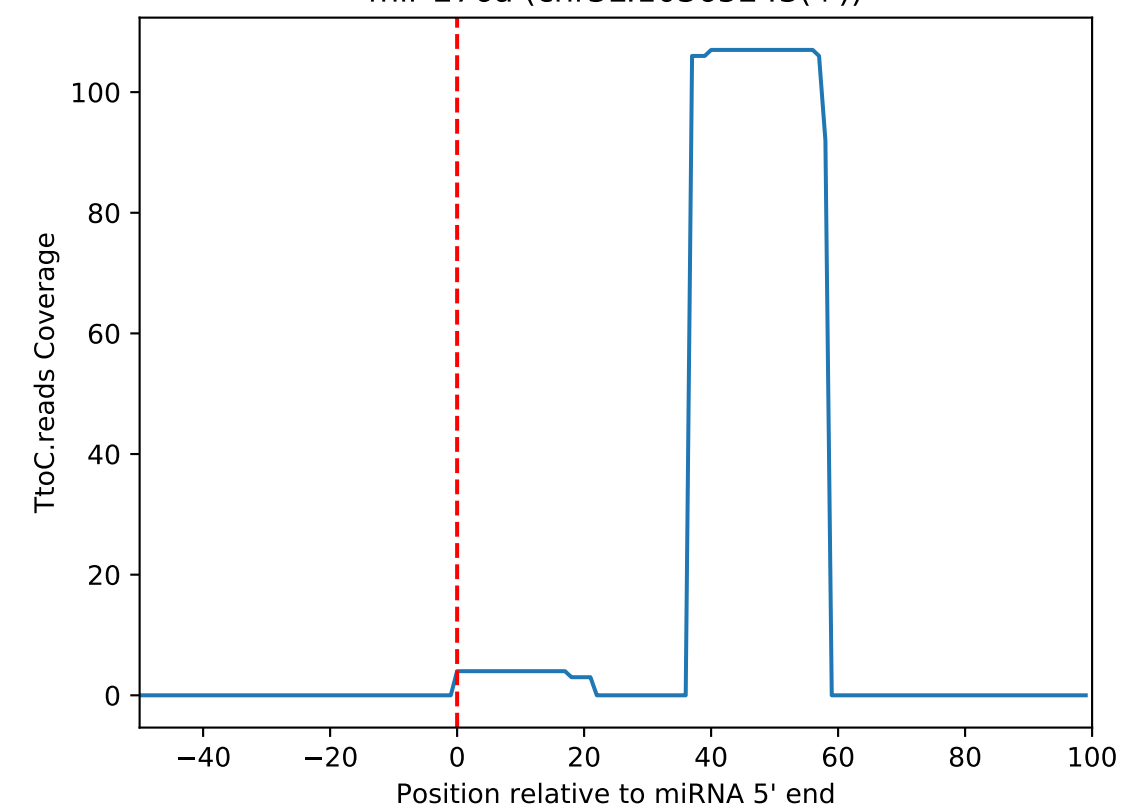

mir-276a (chr3L:10365243(+))

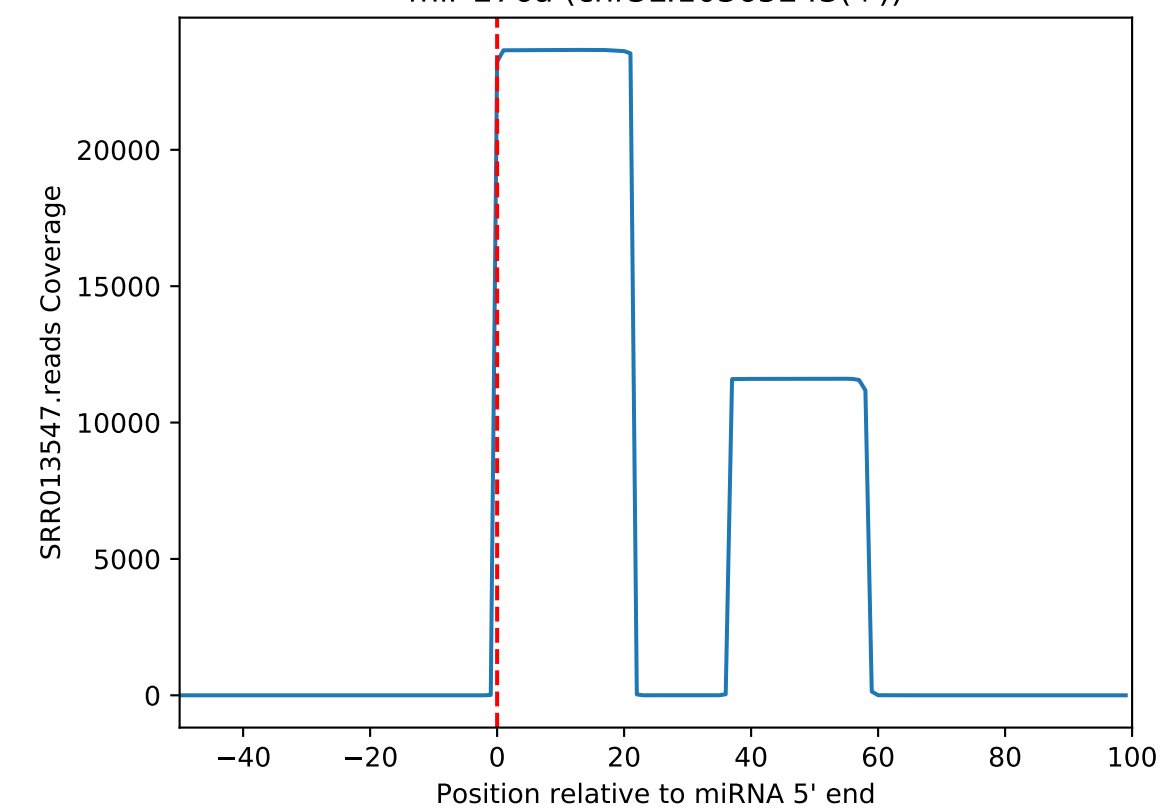

mir-276a (chr3L:10365243(+))

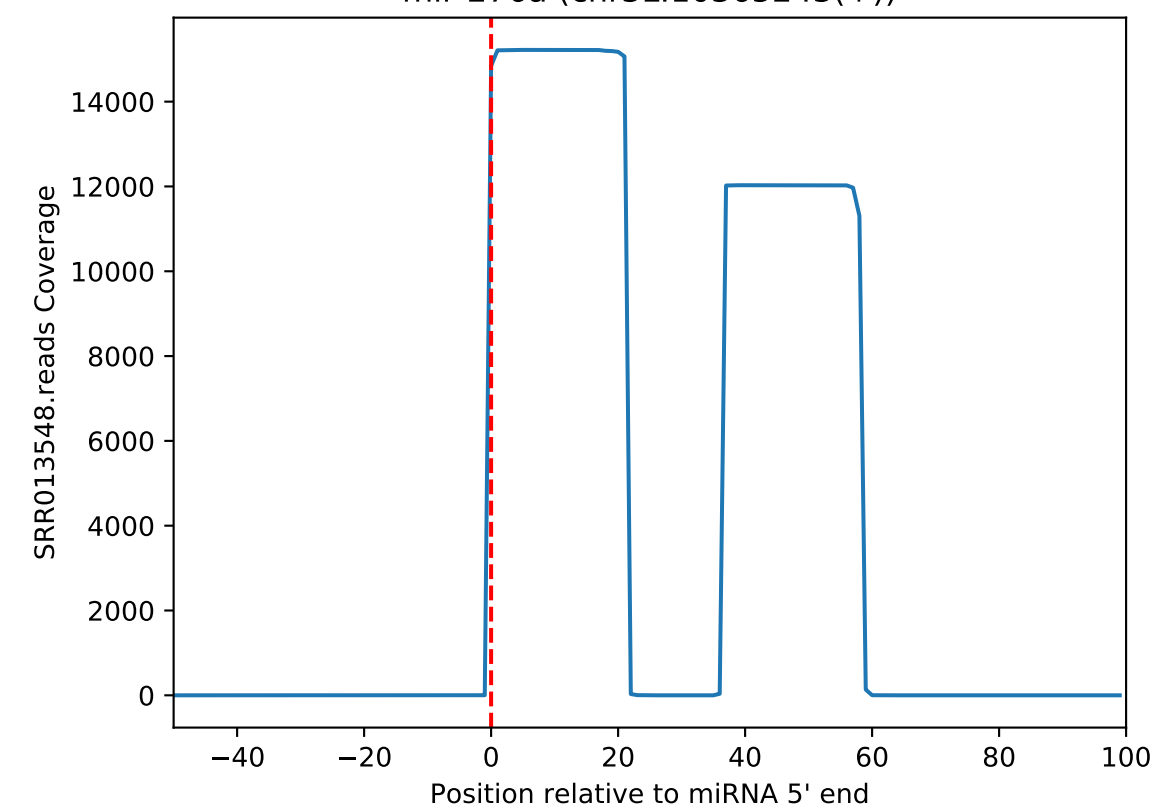

mir-305 (chr2L:7425979(+))

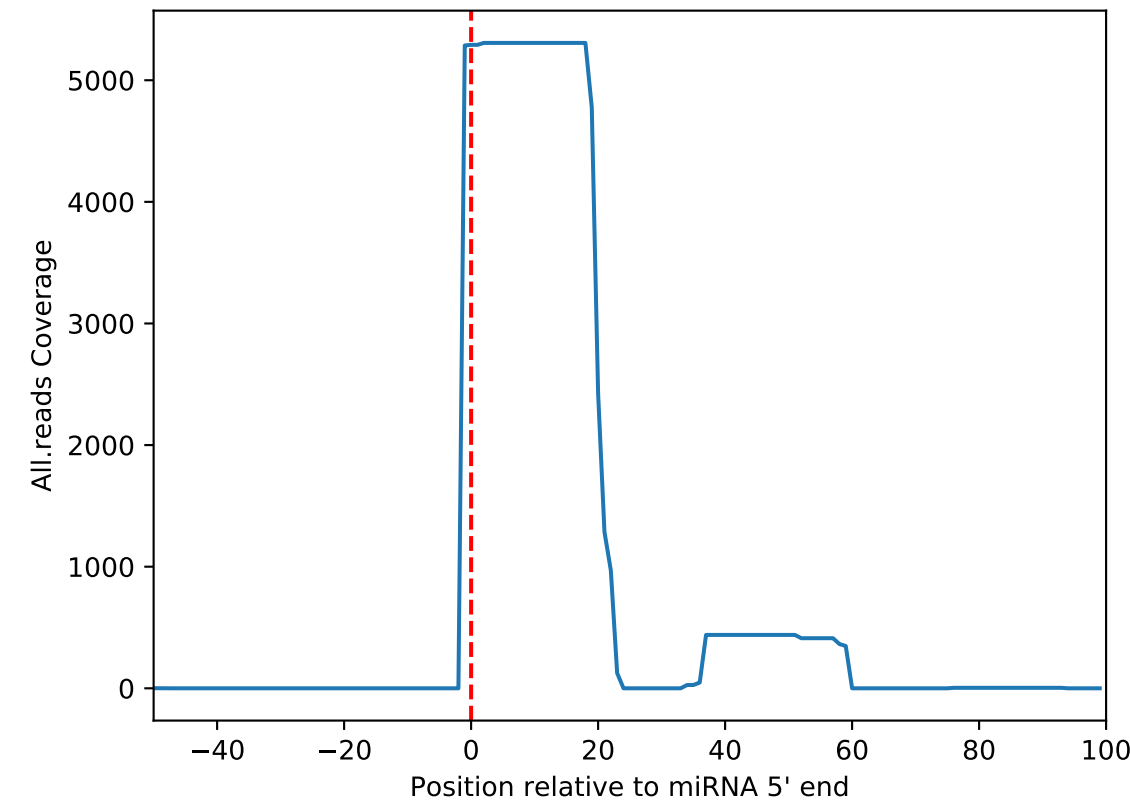

mir-305 (chr2L:7425979(+))

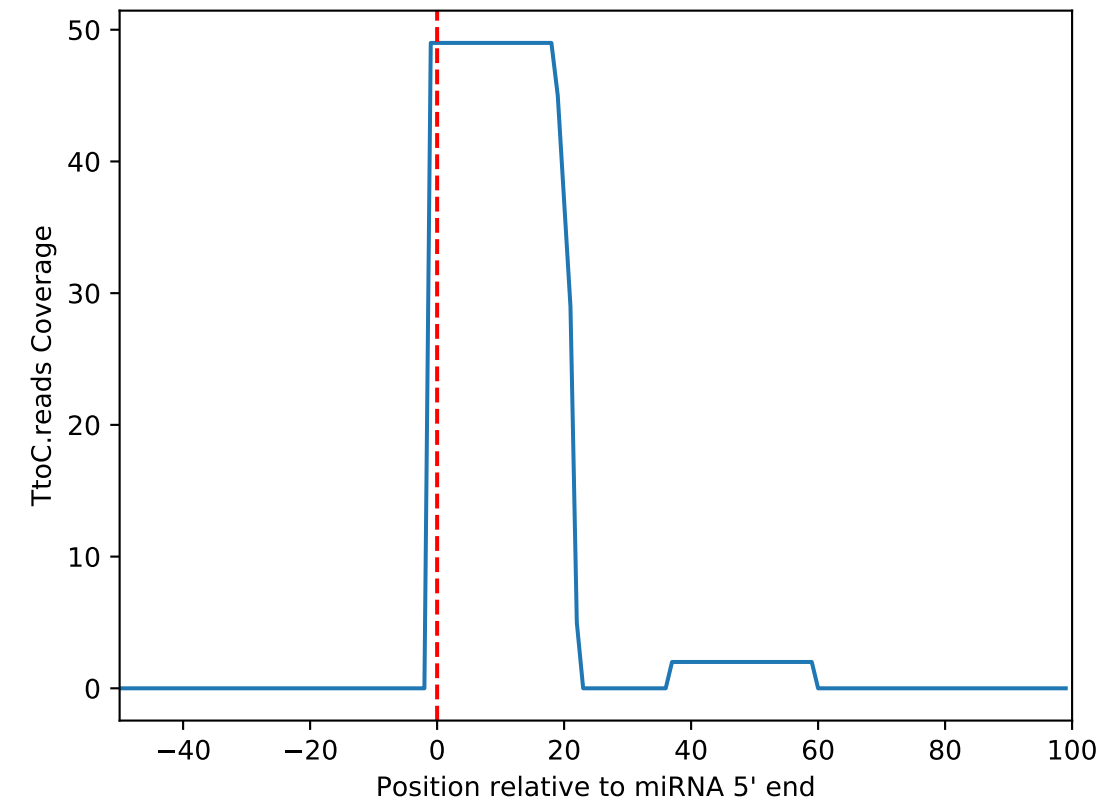

mir-305 (chr2L:7425979(+))

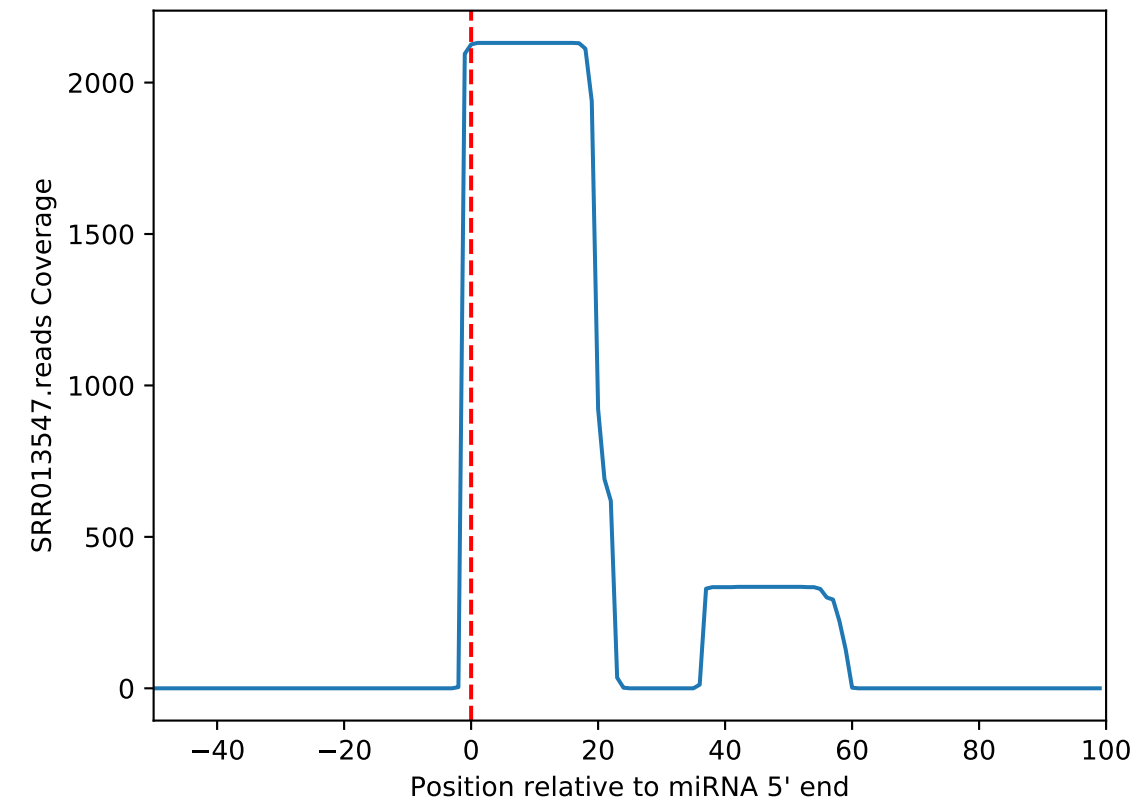

mir-305 (chr2L:7425979(+))

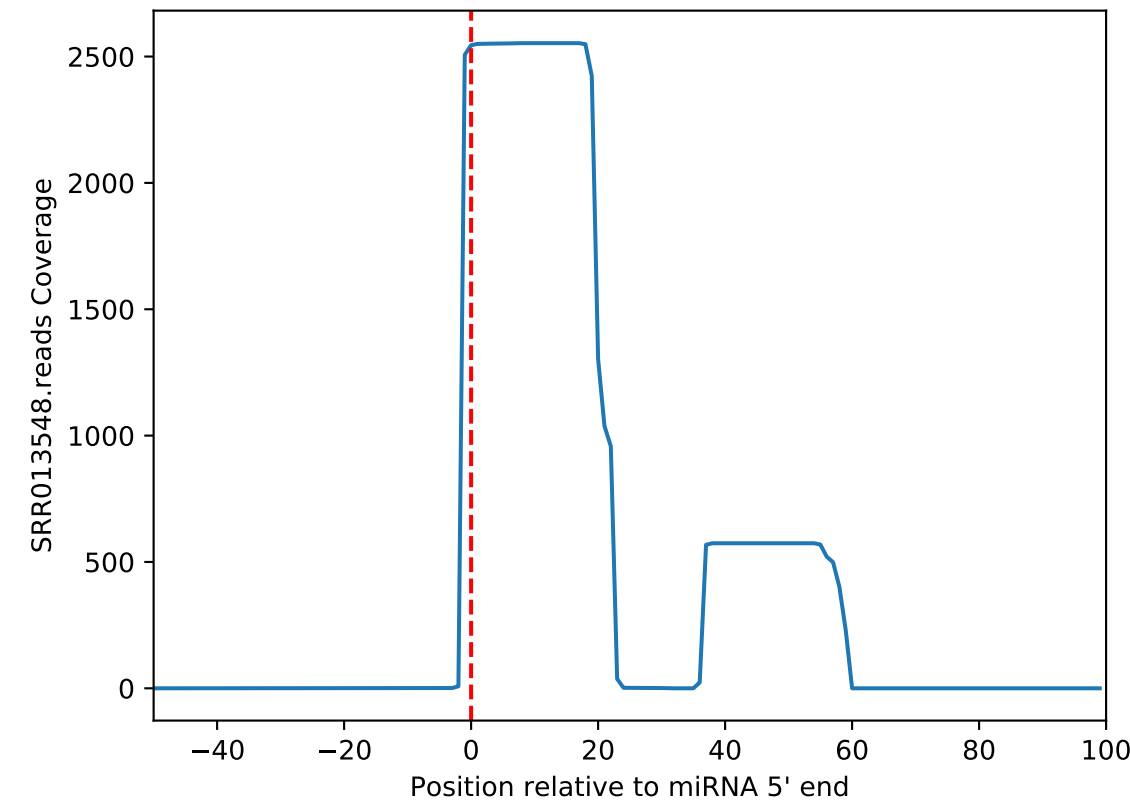



mir-279 (chr3R:29215606(+))

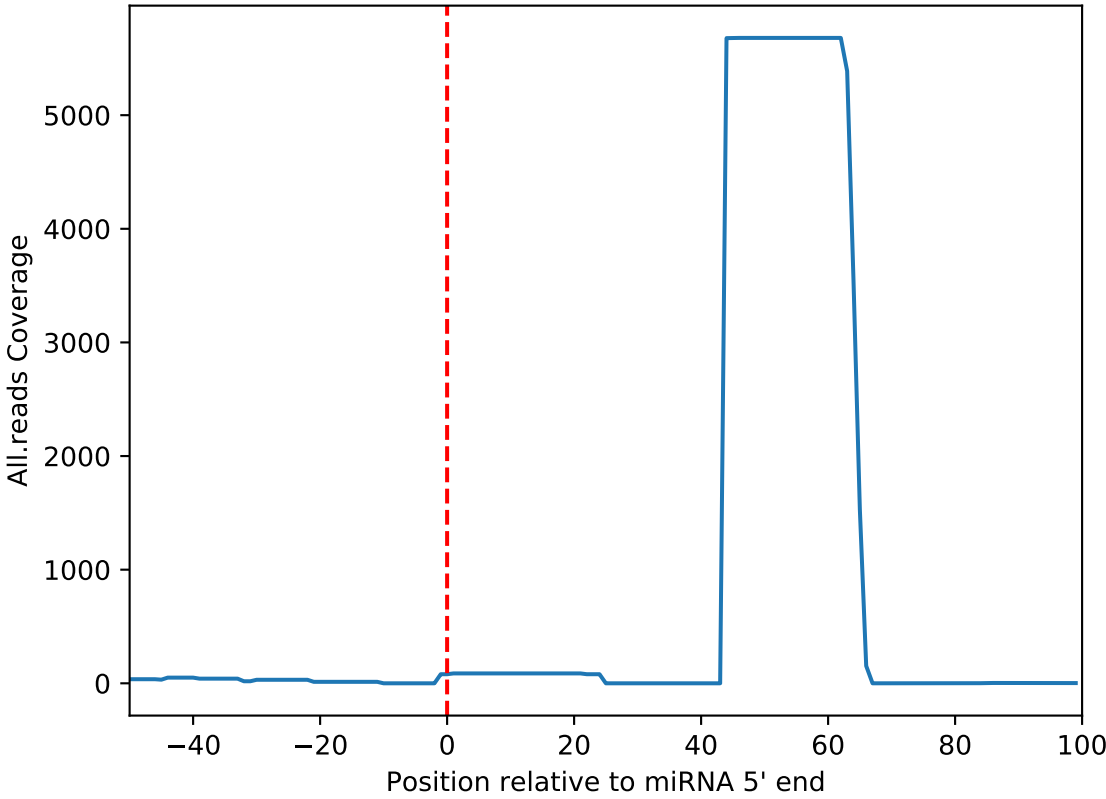

mir-279 (chr3R:29215606(+))

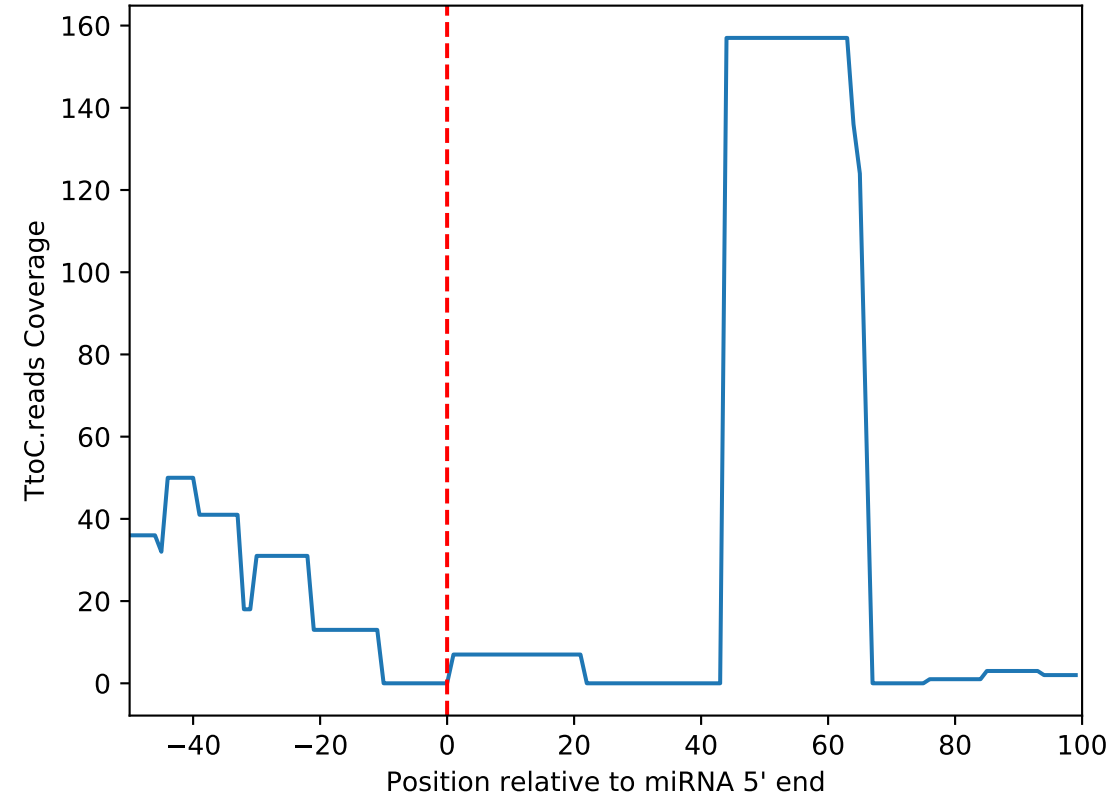

mir-279 (chr3R:29215606(+))

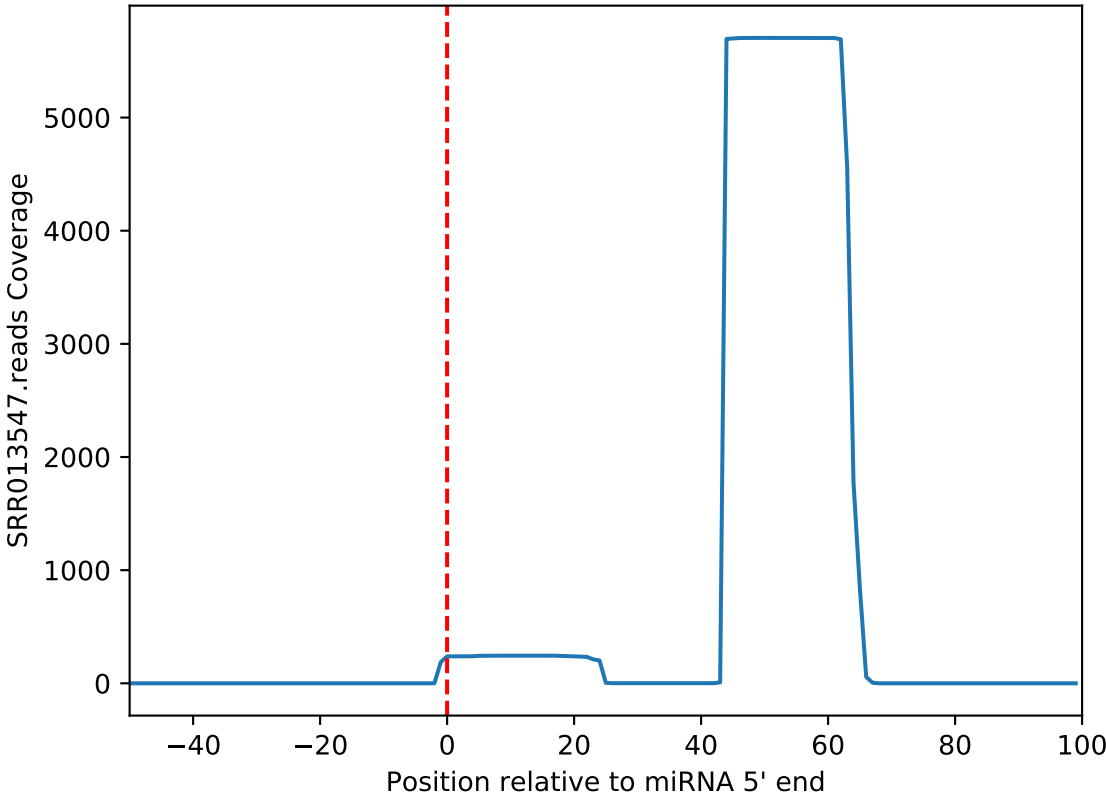

mir-279 (chr3R:29215606(+))

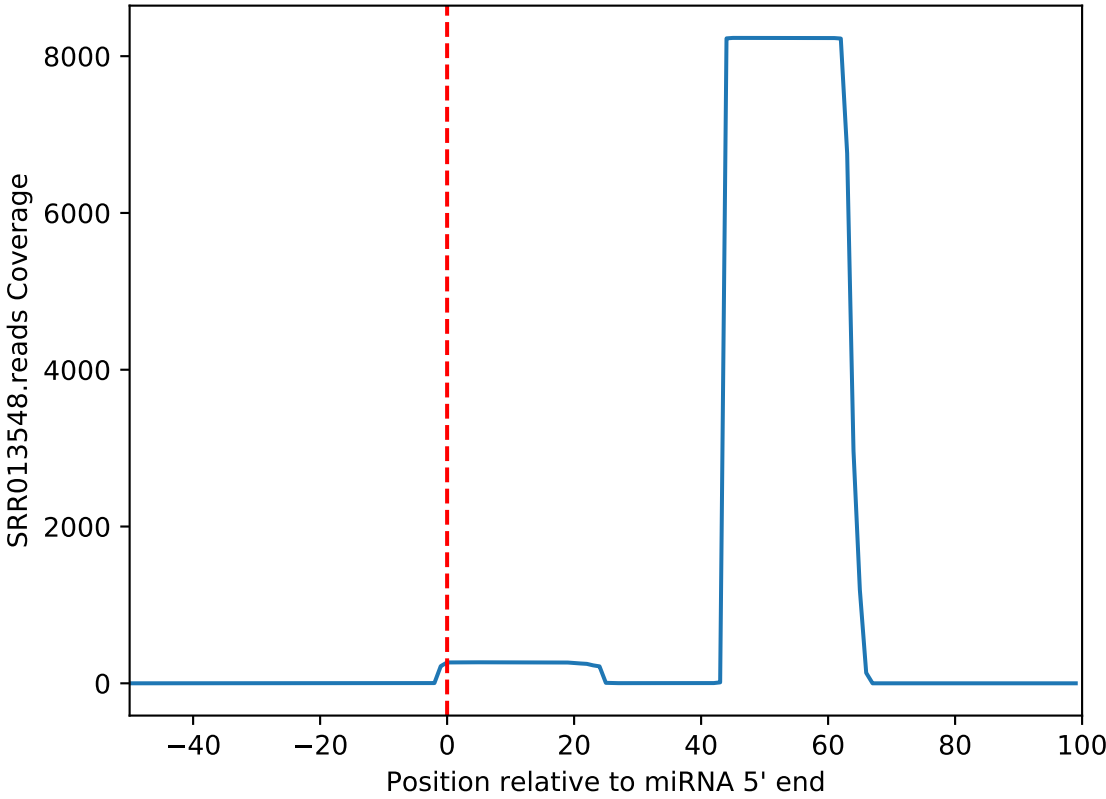

mir-let-7 (chr2L:18472044(+))

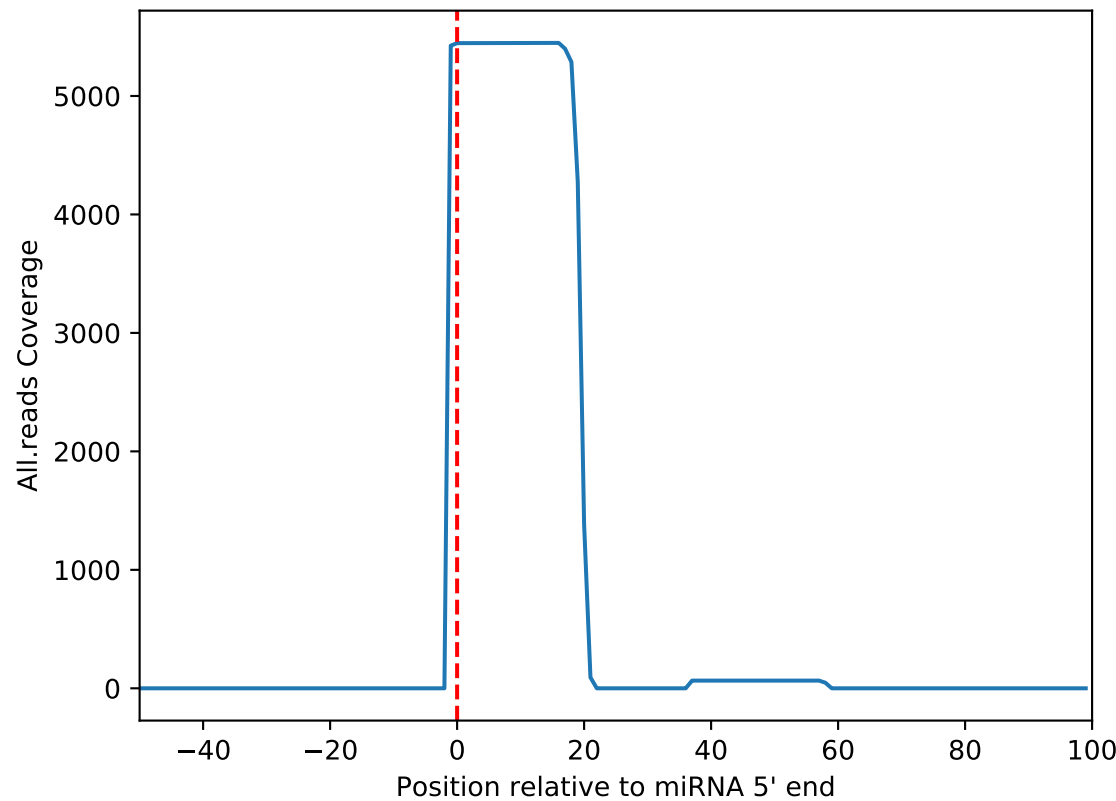

mir-let-7 (chr2L:18472044(+))

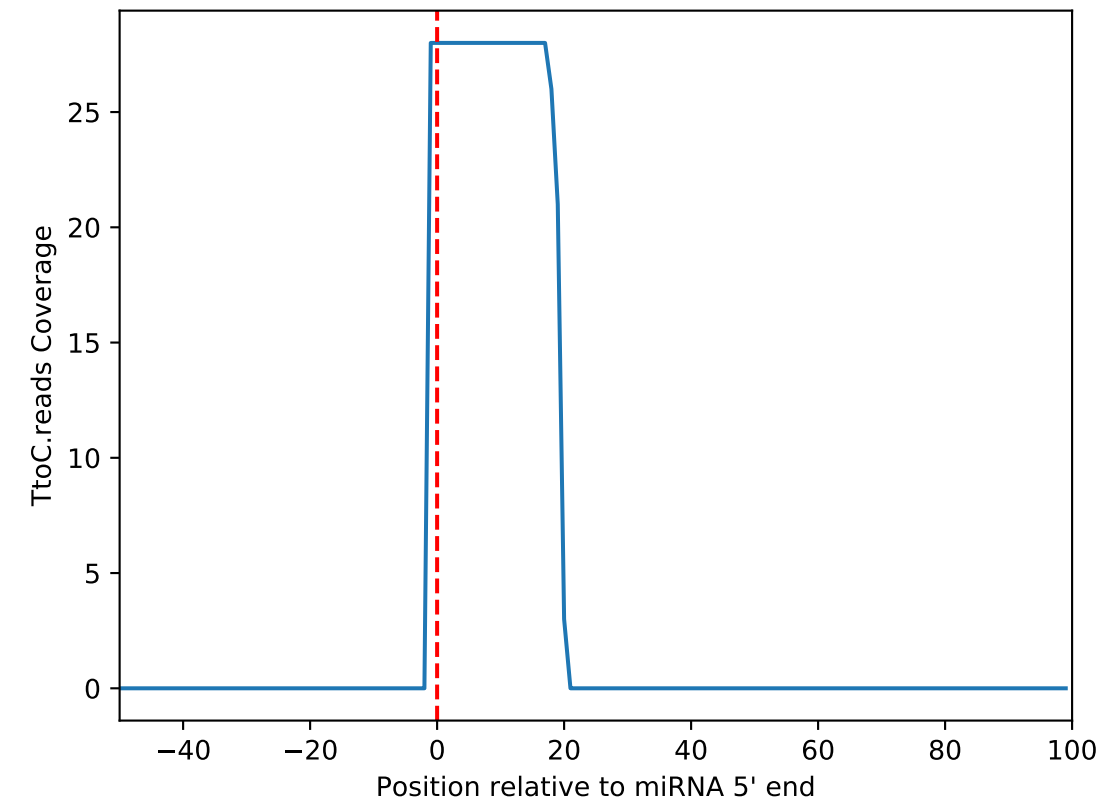

mir-let-7 (chr2L:18472044(+))

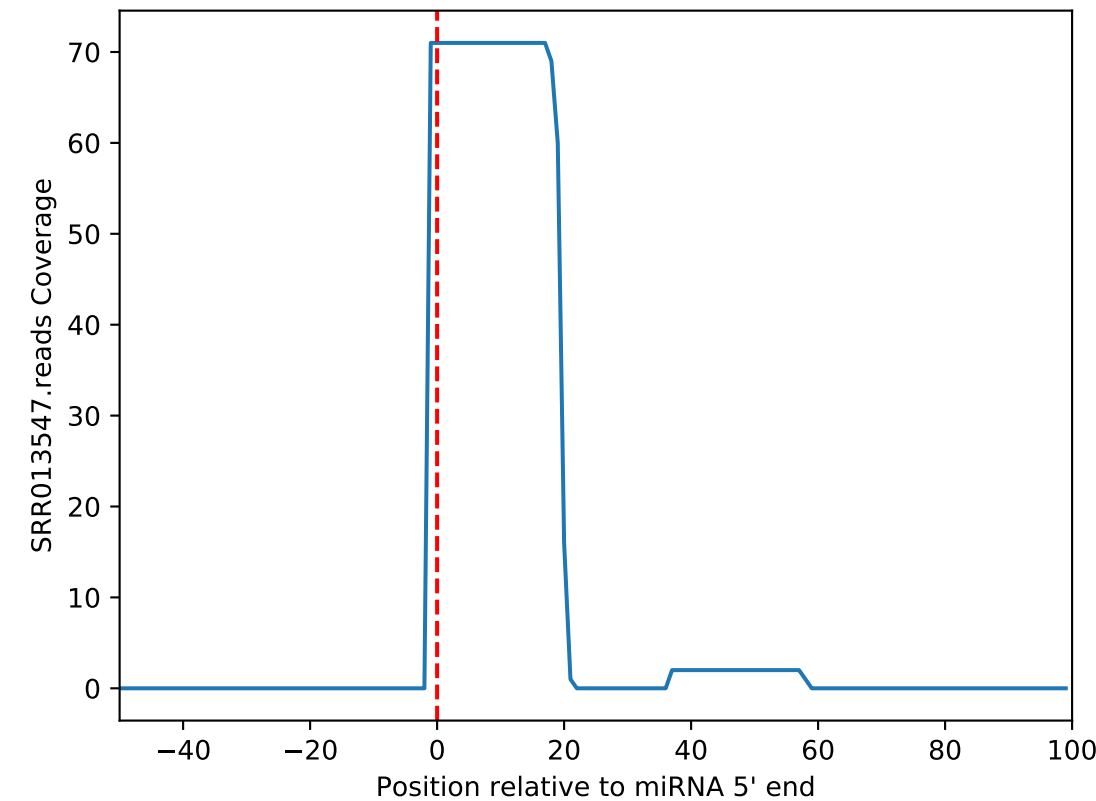

mir-let-7 (chr2L:18472044(+))

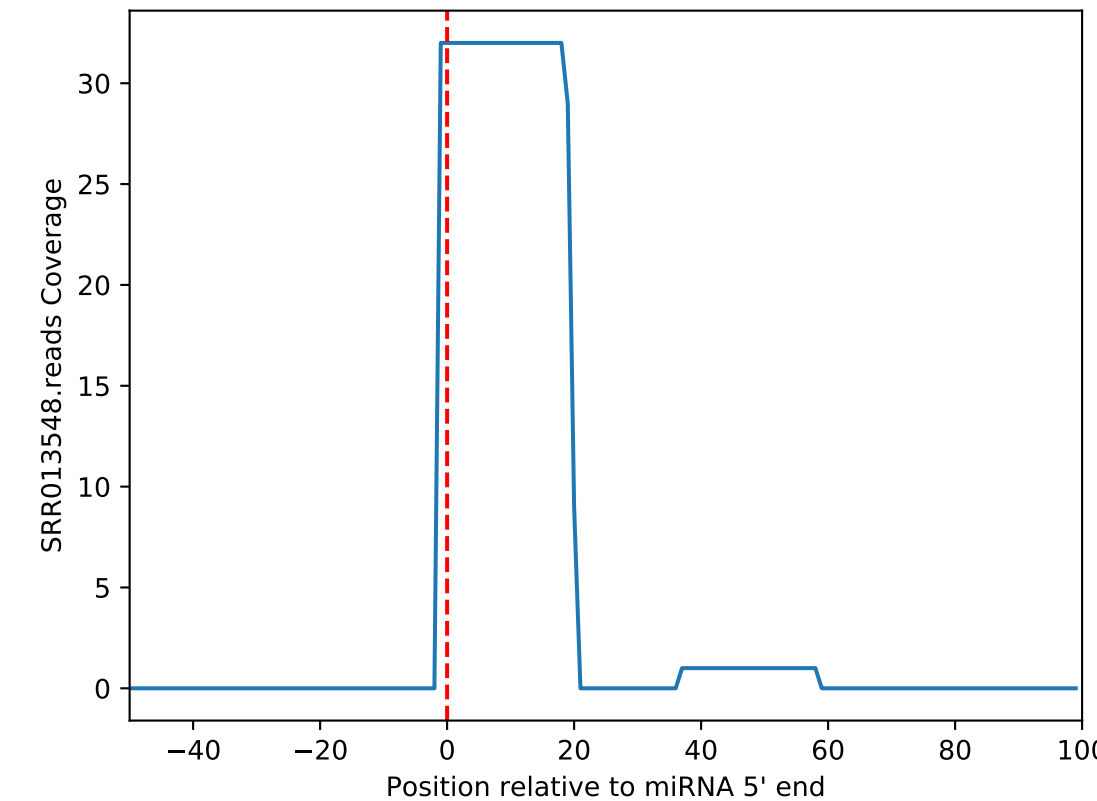

mir-1 (chr2L:20487458(+))

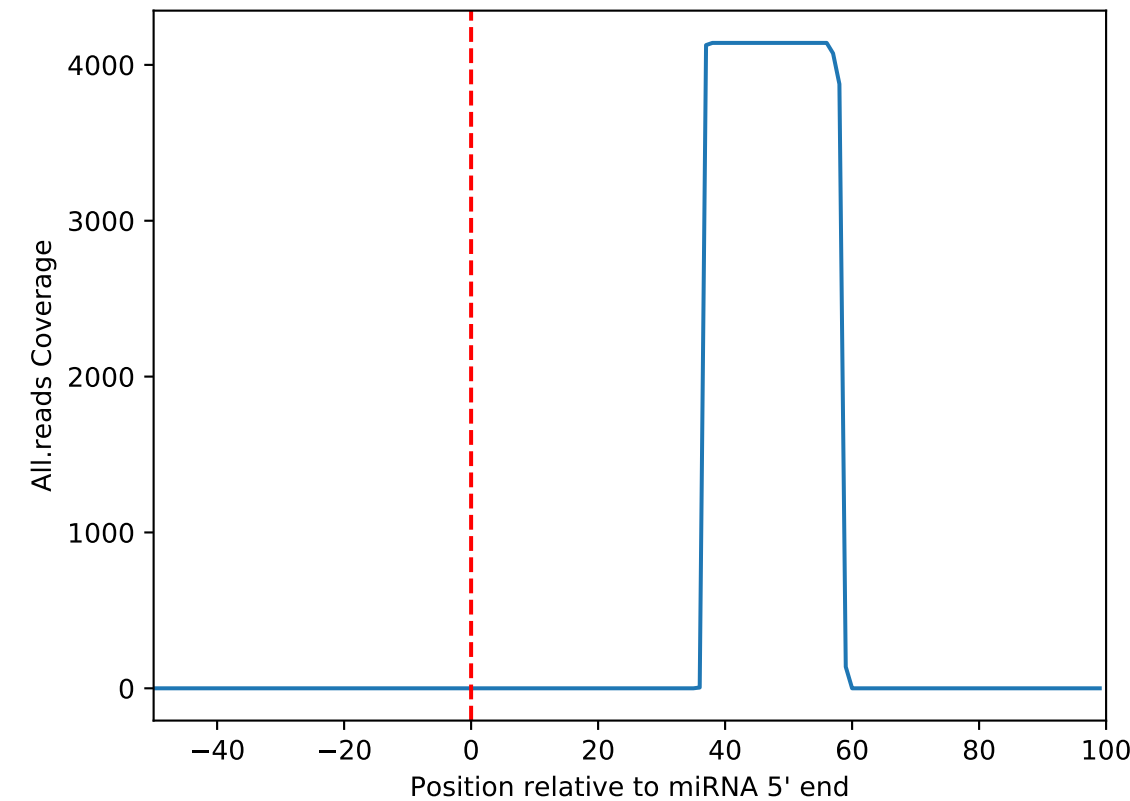

mir-1 (chr2L:20487458(+))

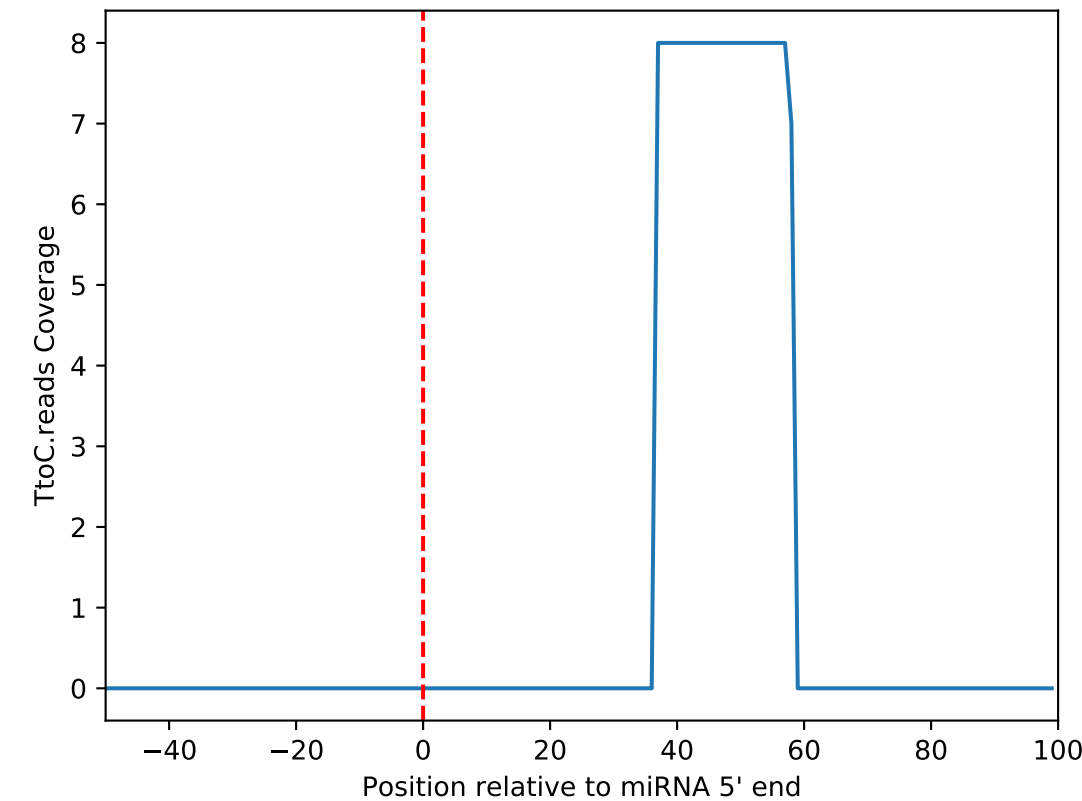

mir-1 (chr2L:20487458(+))

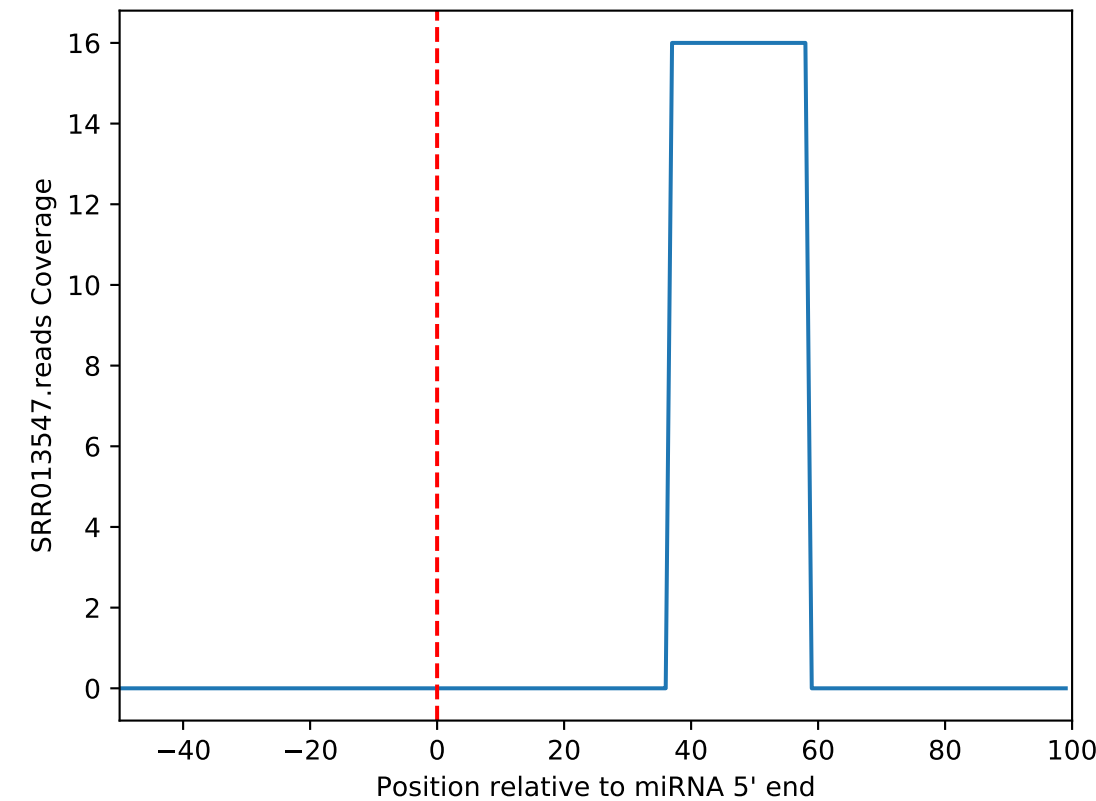

mir-1 (chr2L:20487458(+))

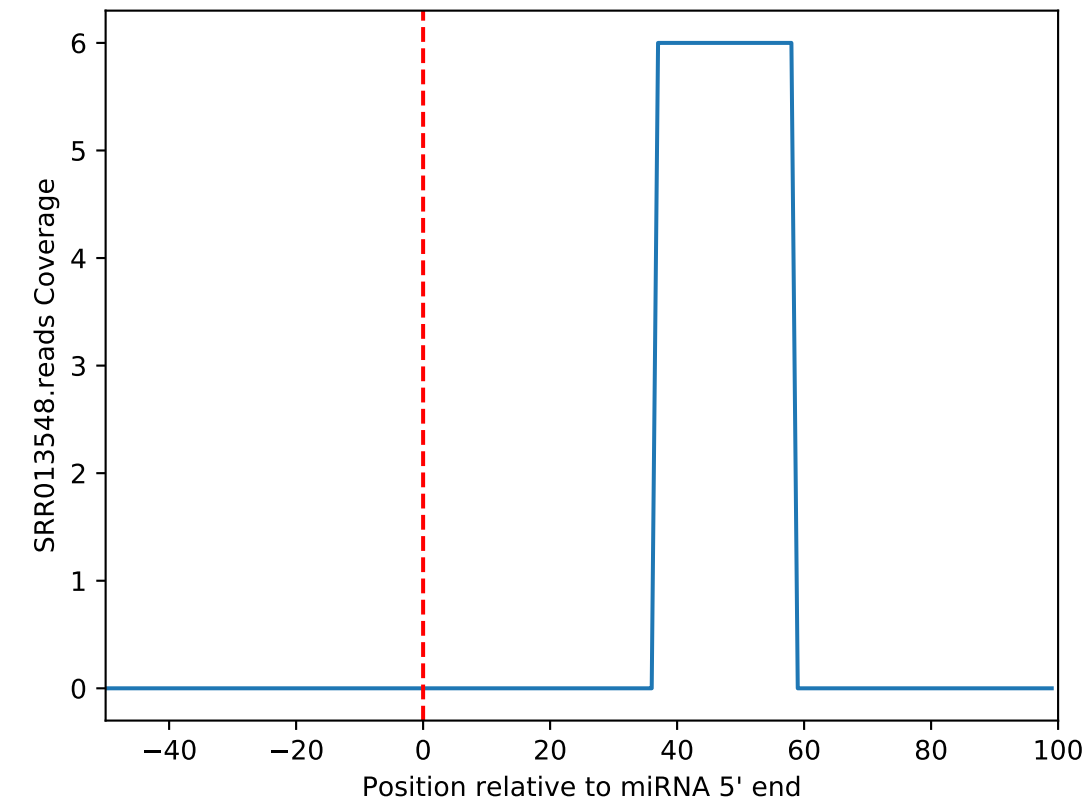

mir-317 (chr3R:10091139(+))

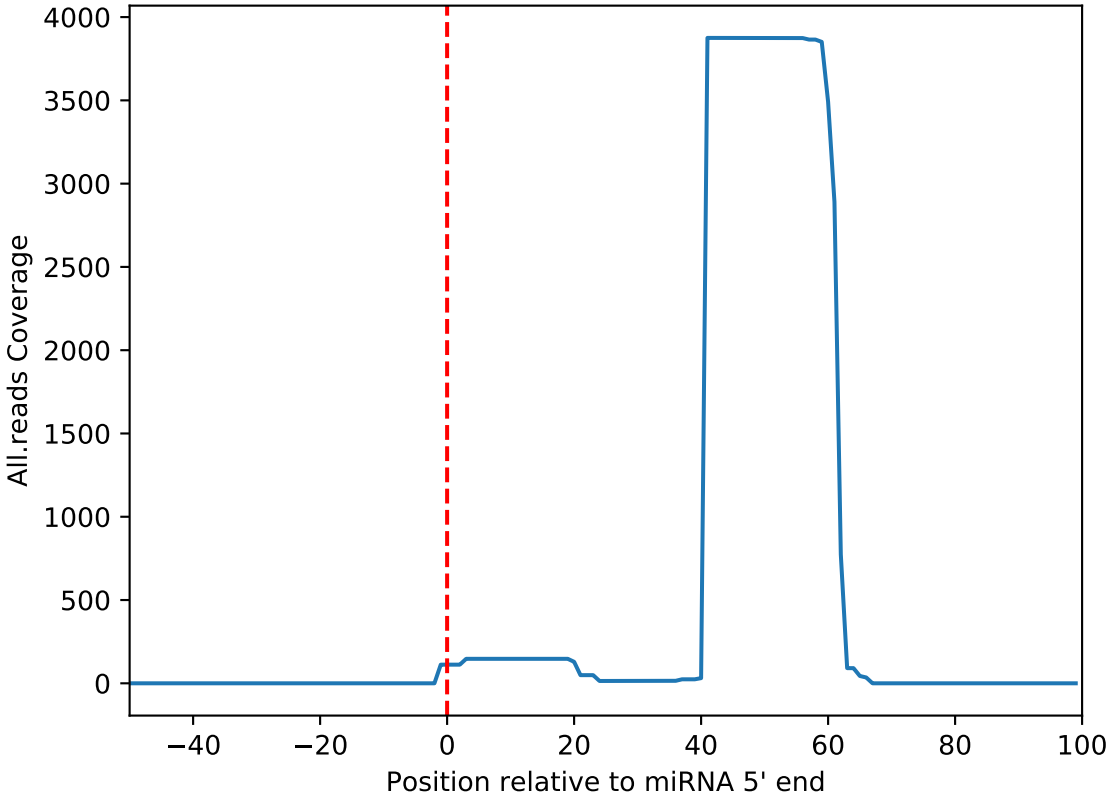

mir-317 (chr3R:10091139(+))

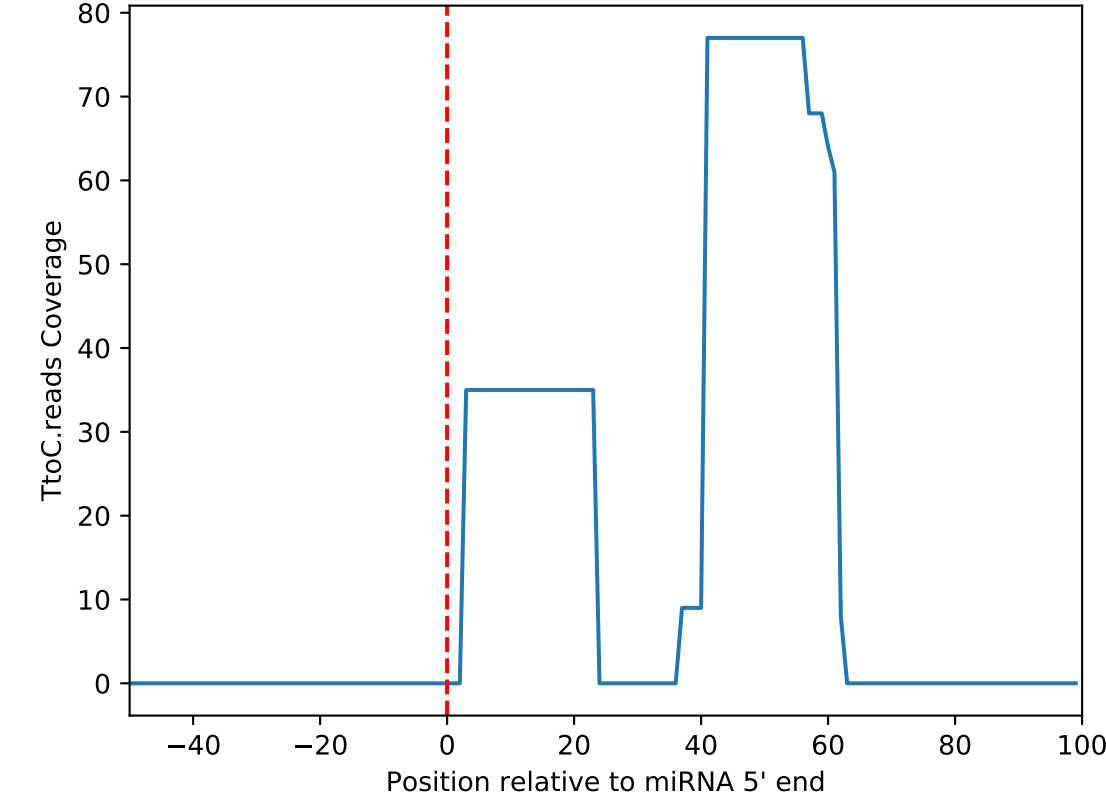

mir-317 (chr3R:10091139(+))

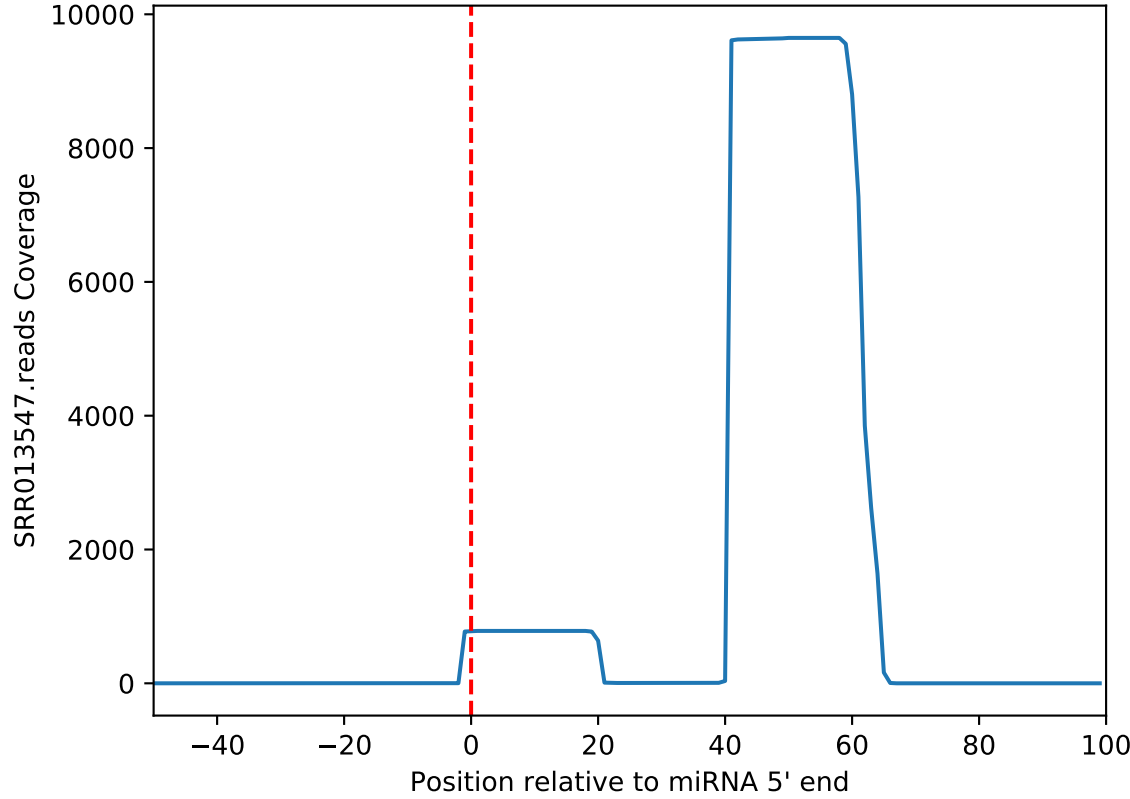

mir-317 (chr3R:10091139(+))

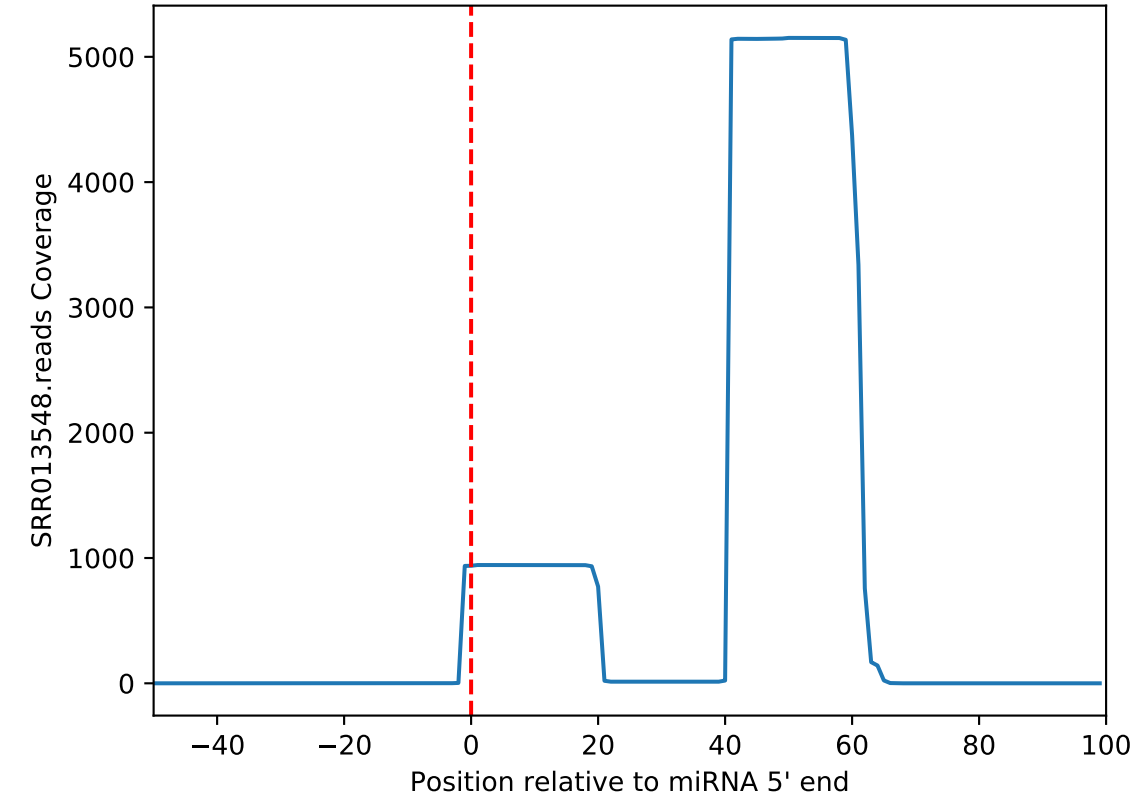

mir-306 (chr2L:16698418(+))

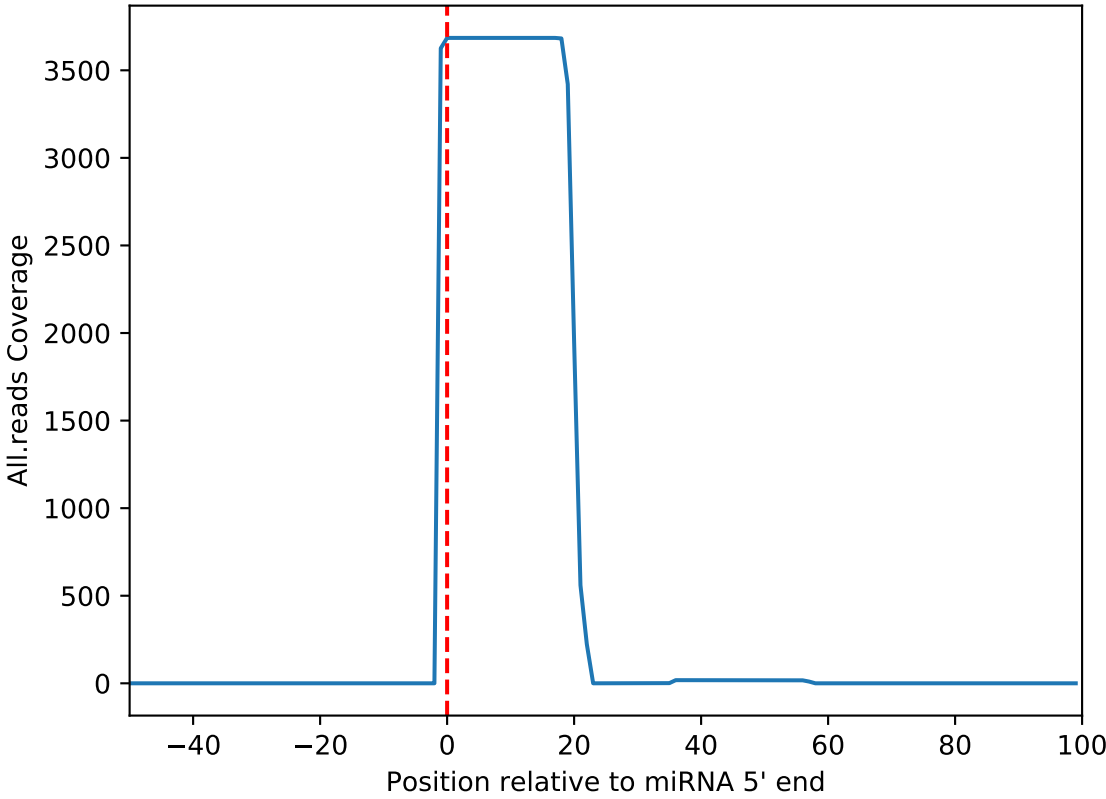

mir-306 (chr2L:16698418(+))

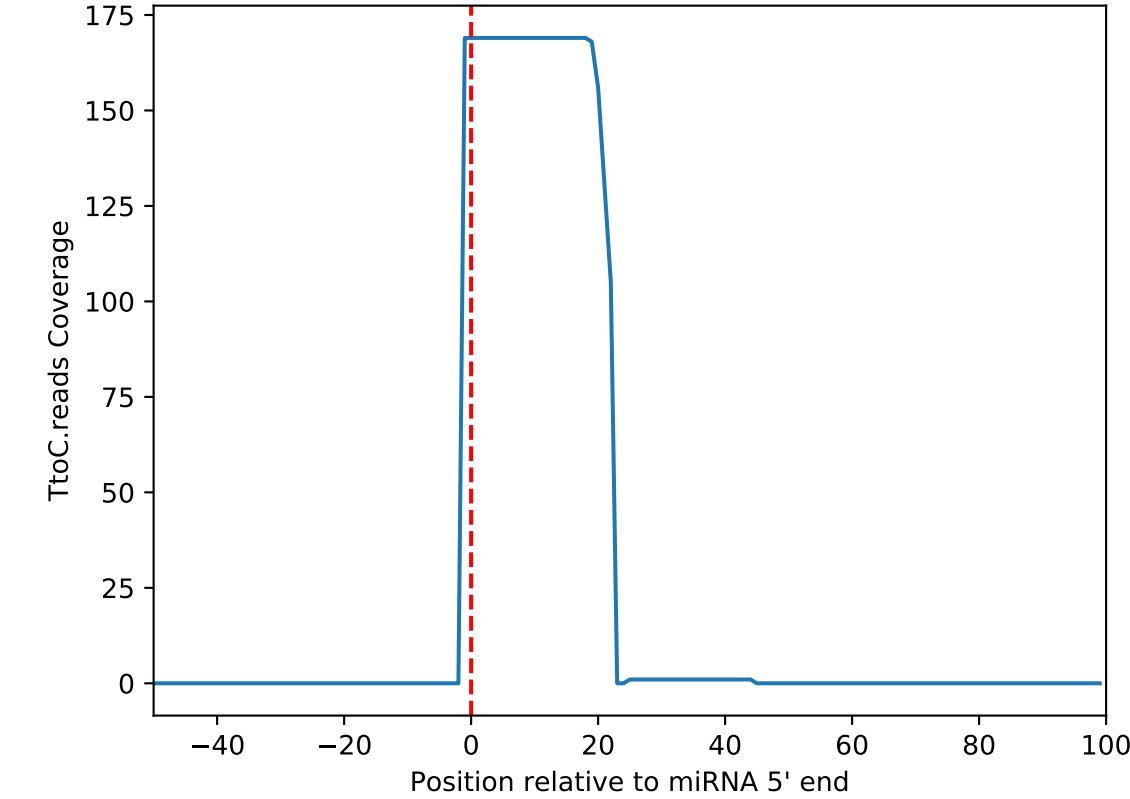

mir-306 (chr2L:16698418(+))

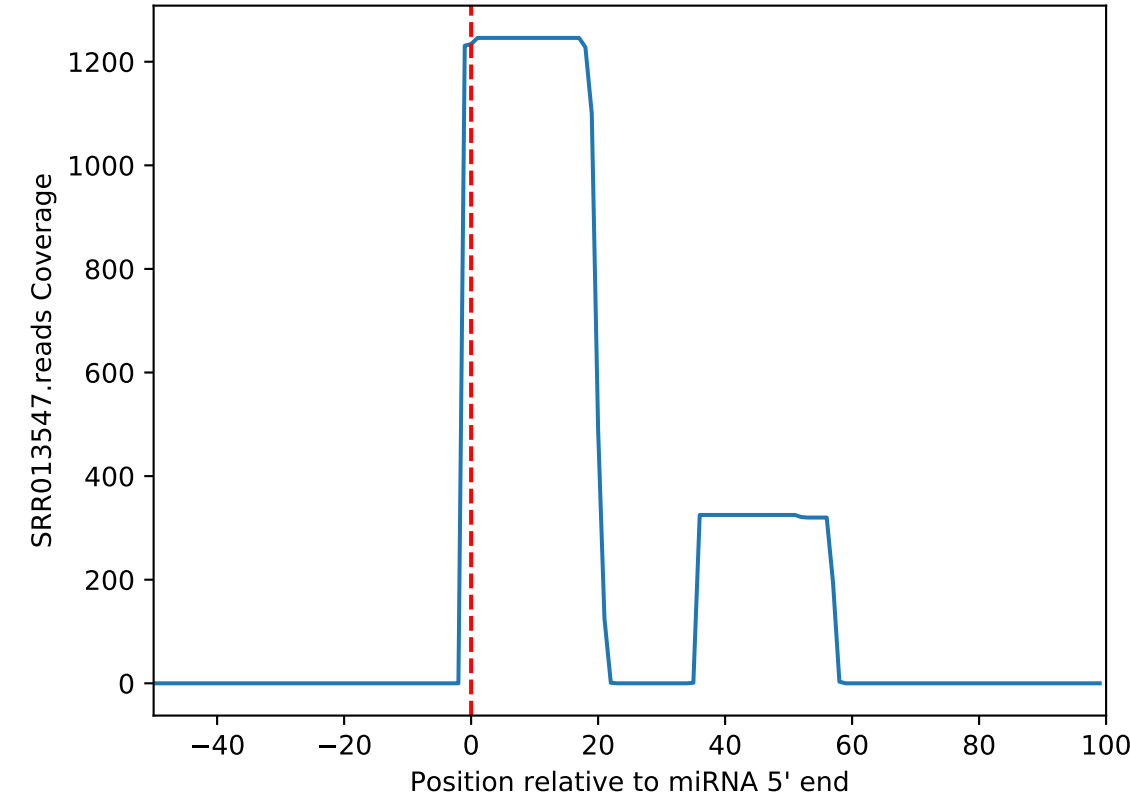

mir-306 (chr2L:16698418(+))

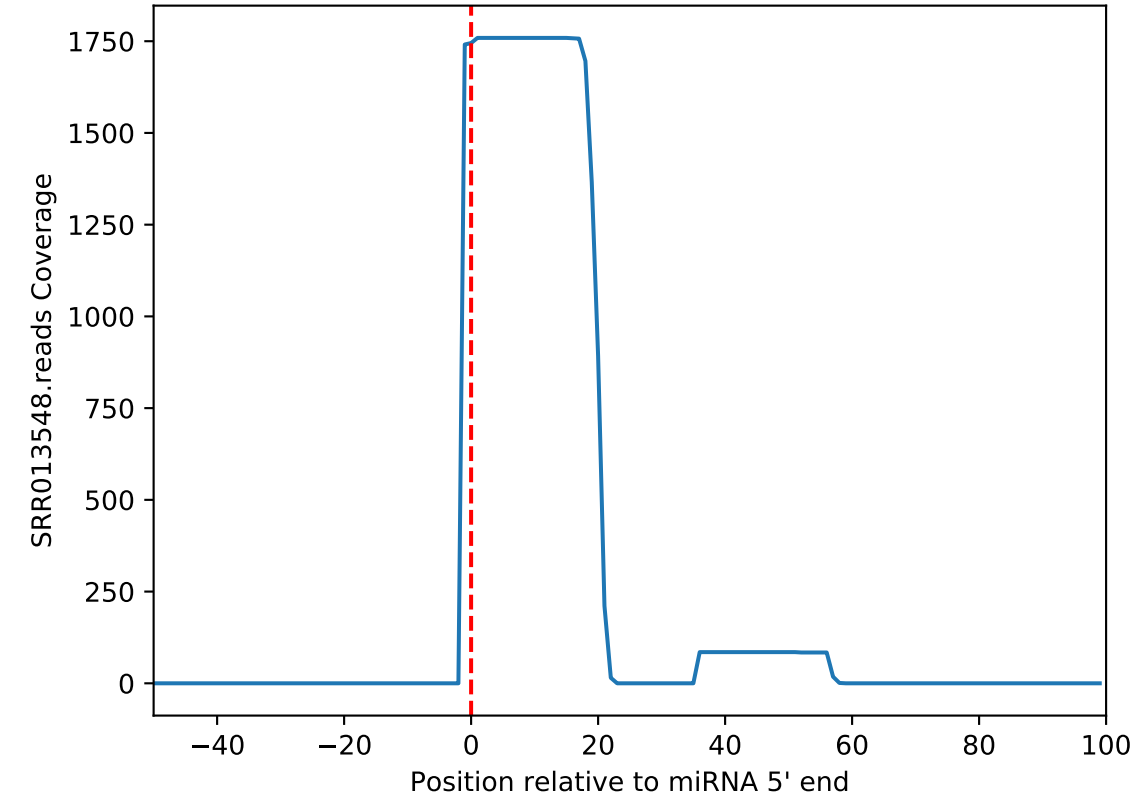

mir-9a (chr3L:19565140(+))

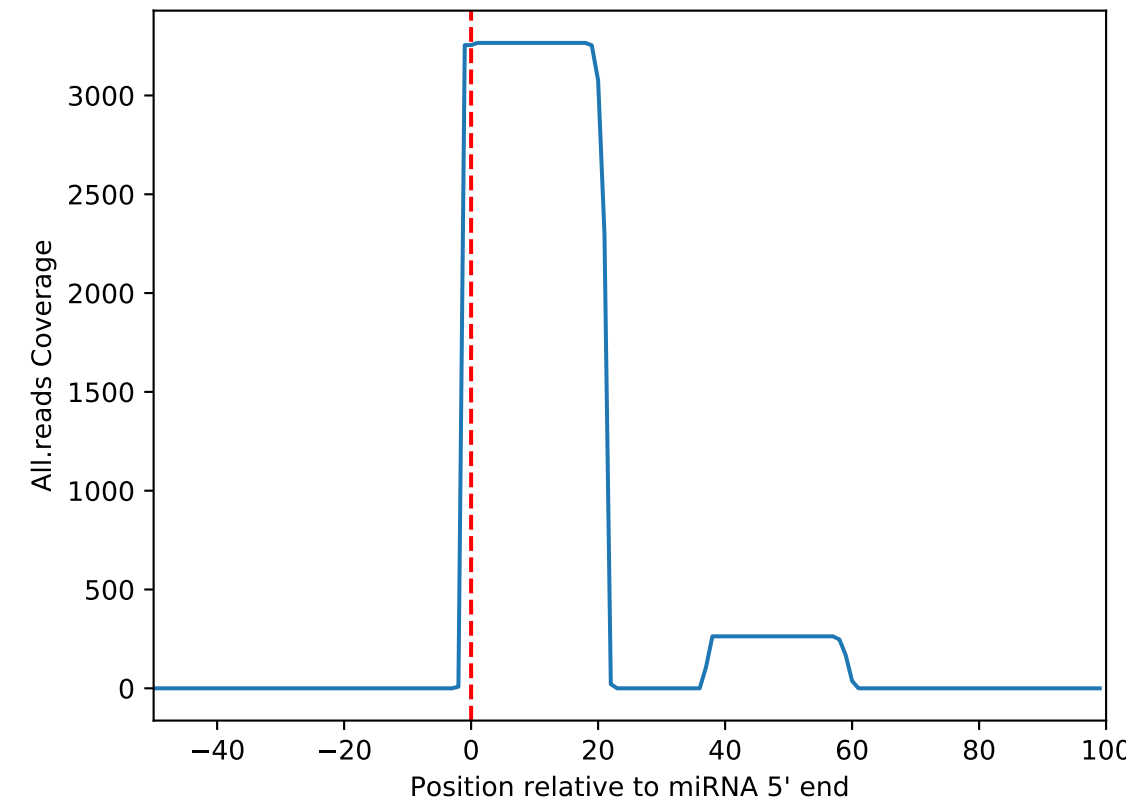

mir-9a (chr3L:19565140(+))

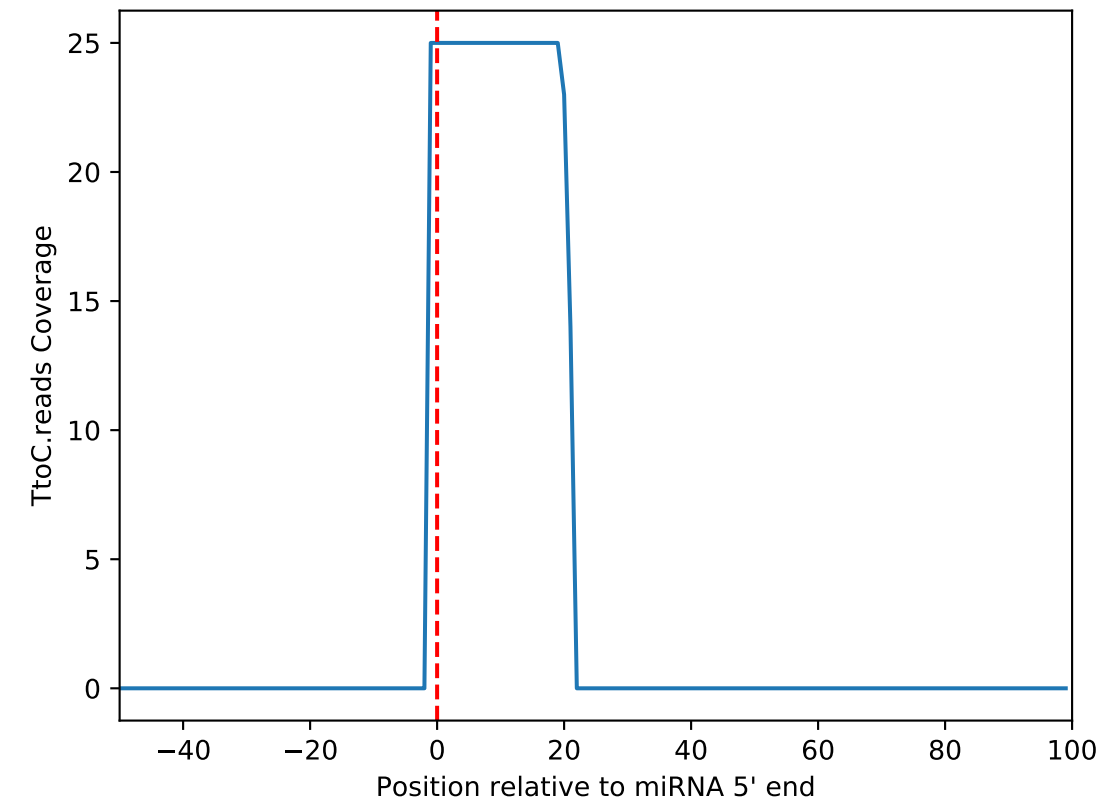

mir-9a (chr3L:19565140(+))

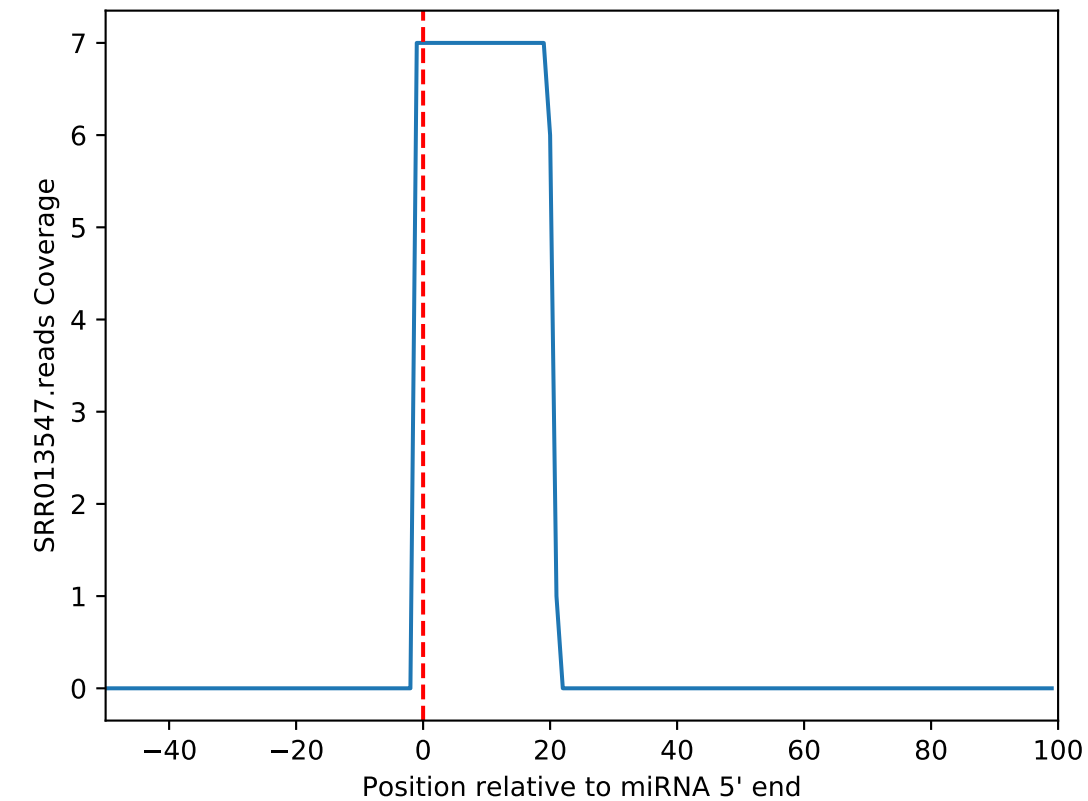

mir-9a (chr3L:19565140(+))

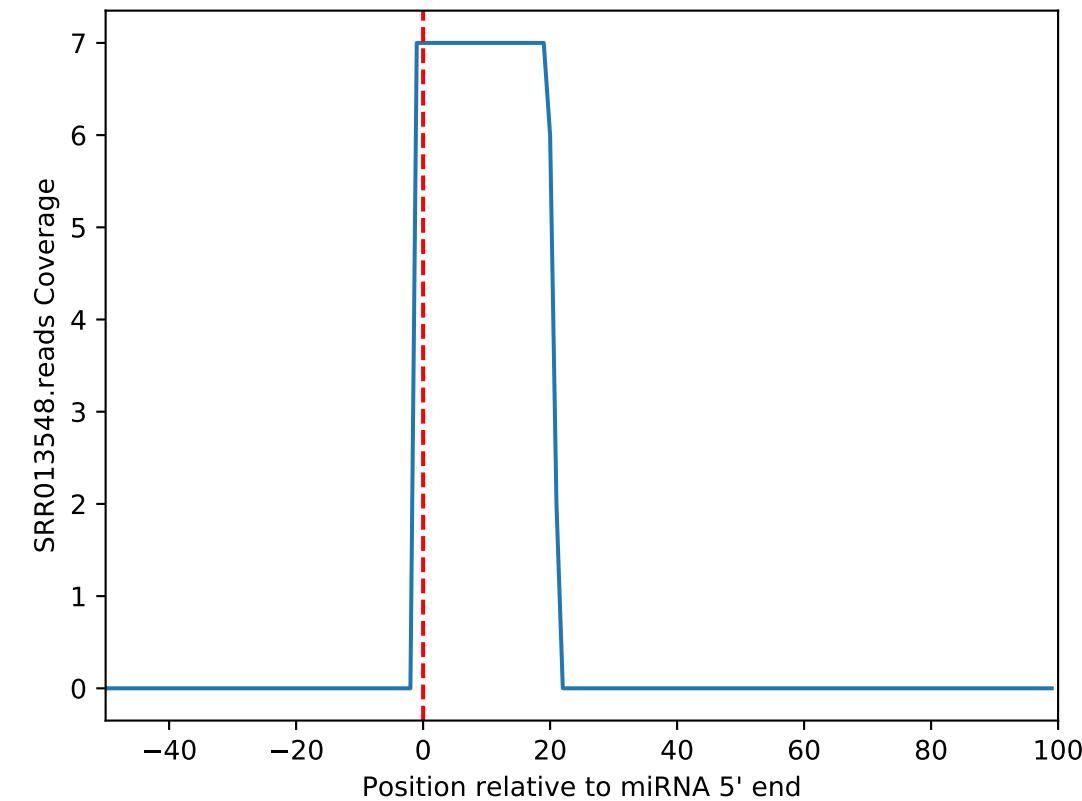

mir-9b (chr2L:16698758(+))

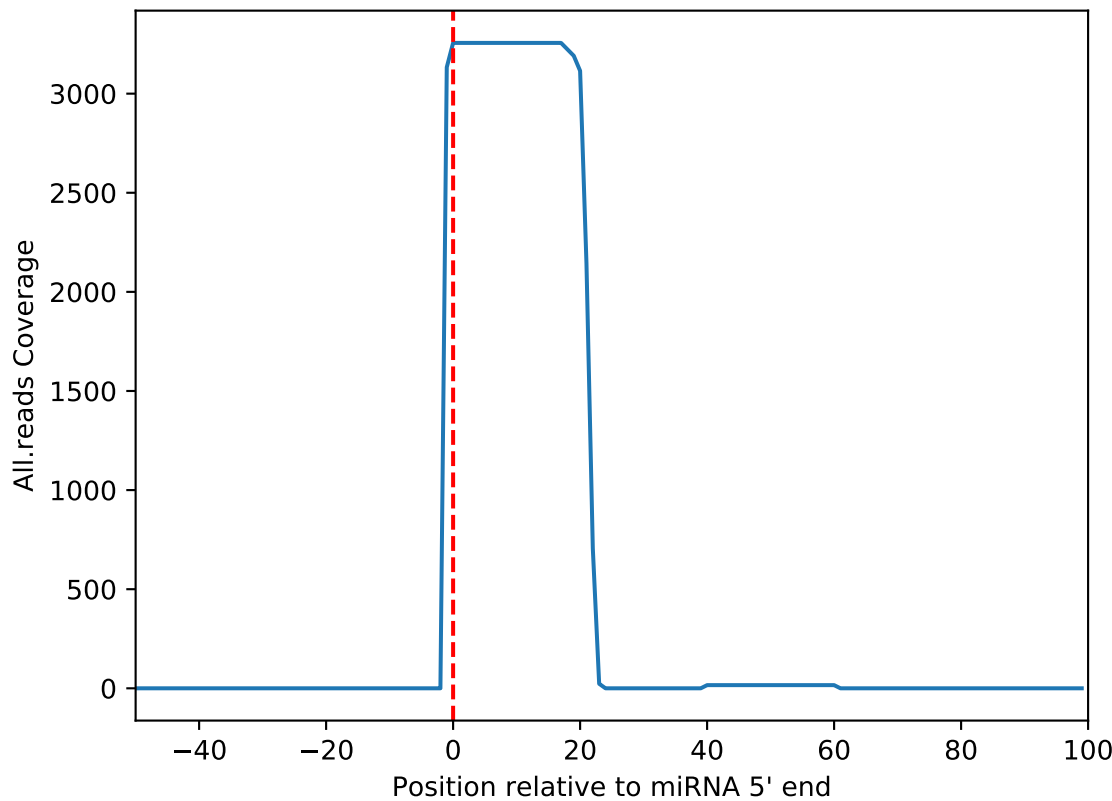

mir-9b (chr2L:16698758(+))

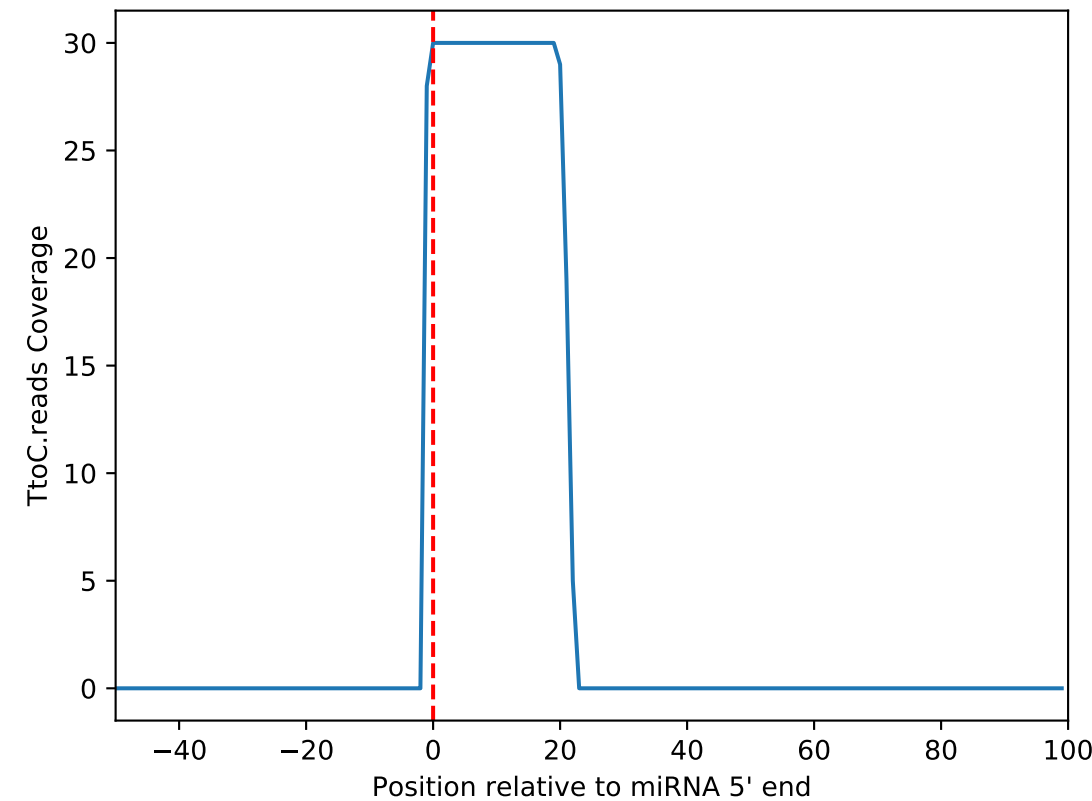

mir-9b (chr2L:16698758(+))

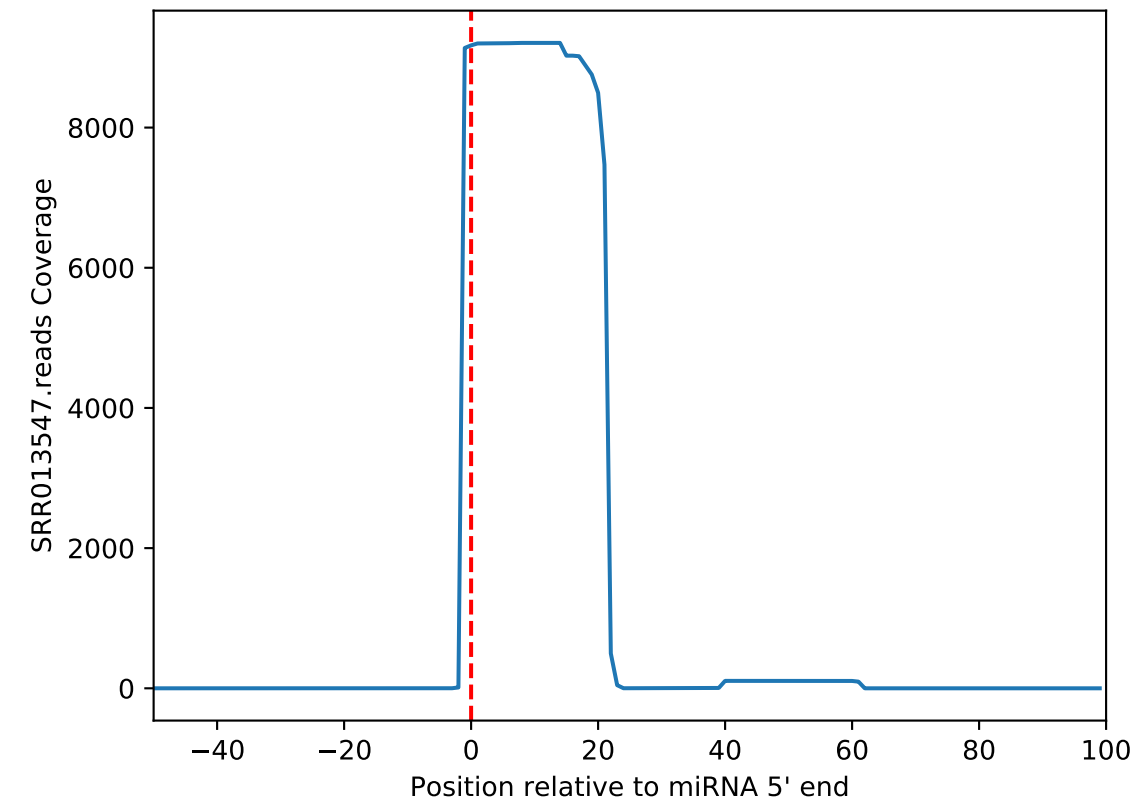

mir-9b (chr2L:16698758(+))

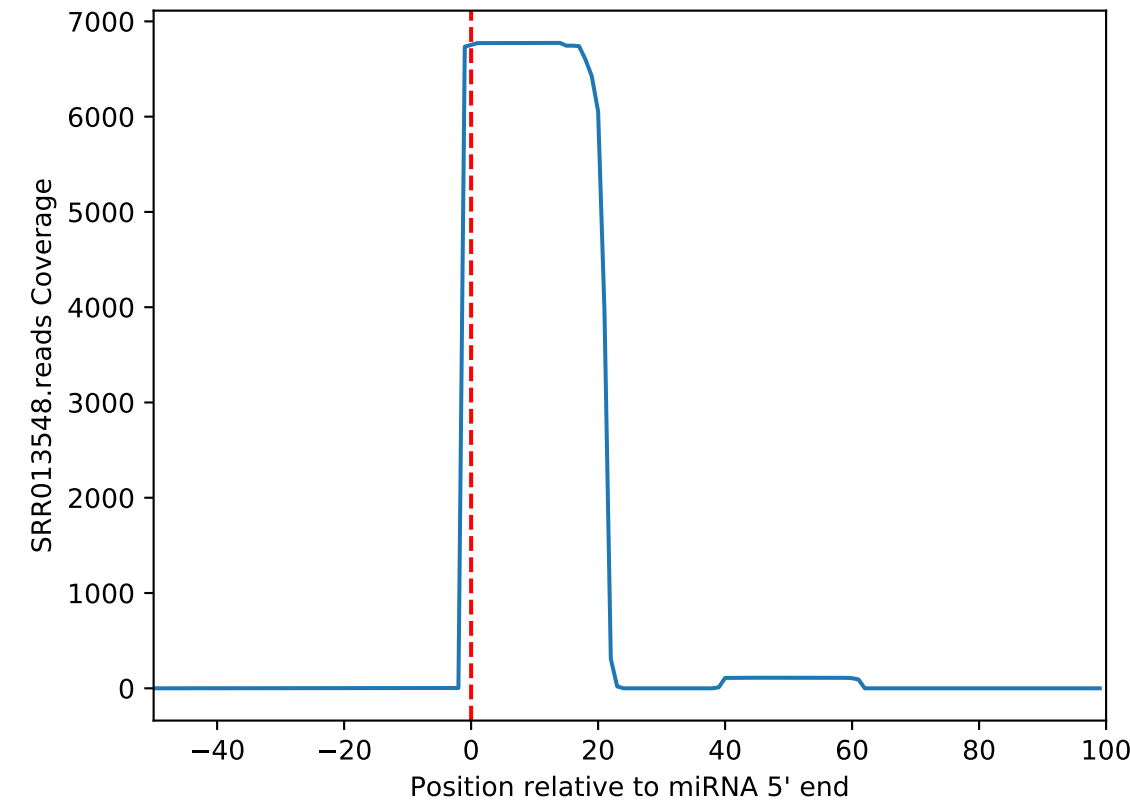

mir-311 (chr2R:20583946(-))

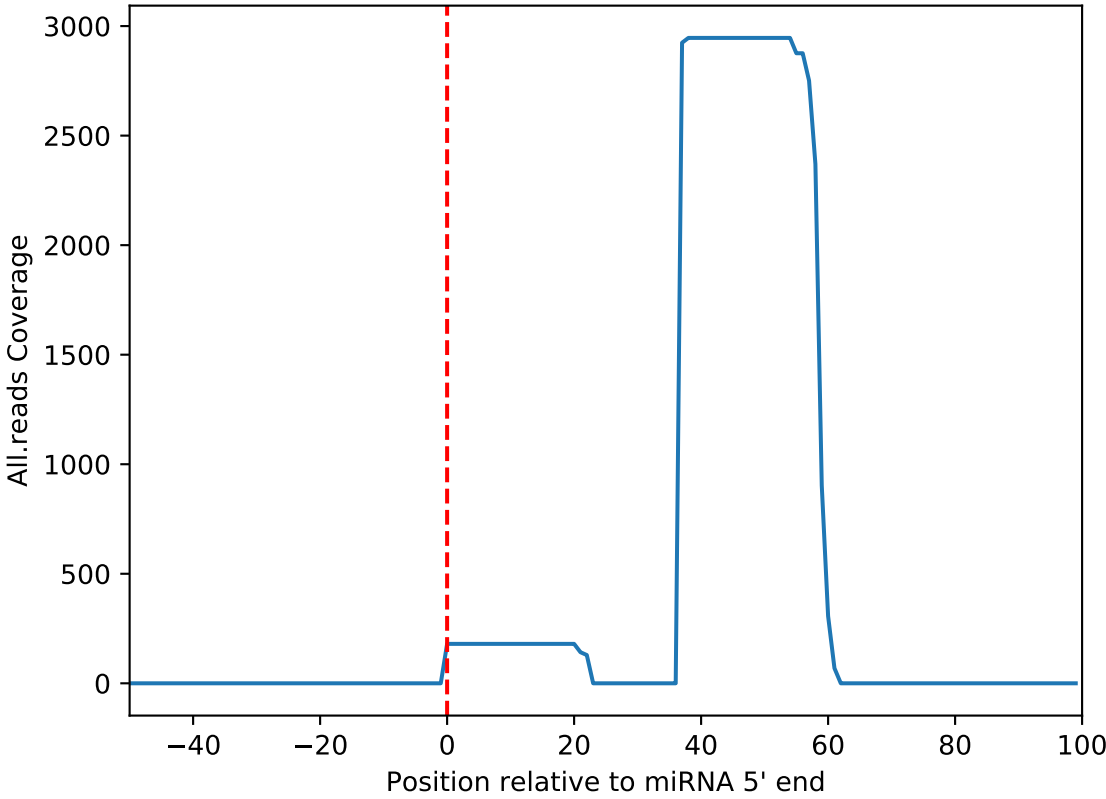

mir-311 (chr2R:20583946(-))

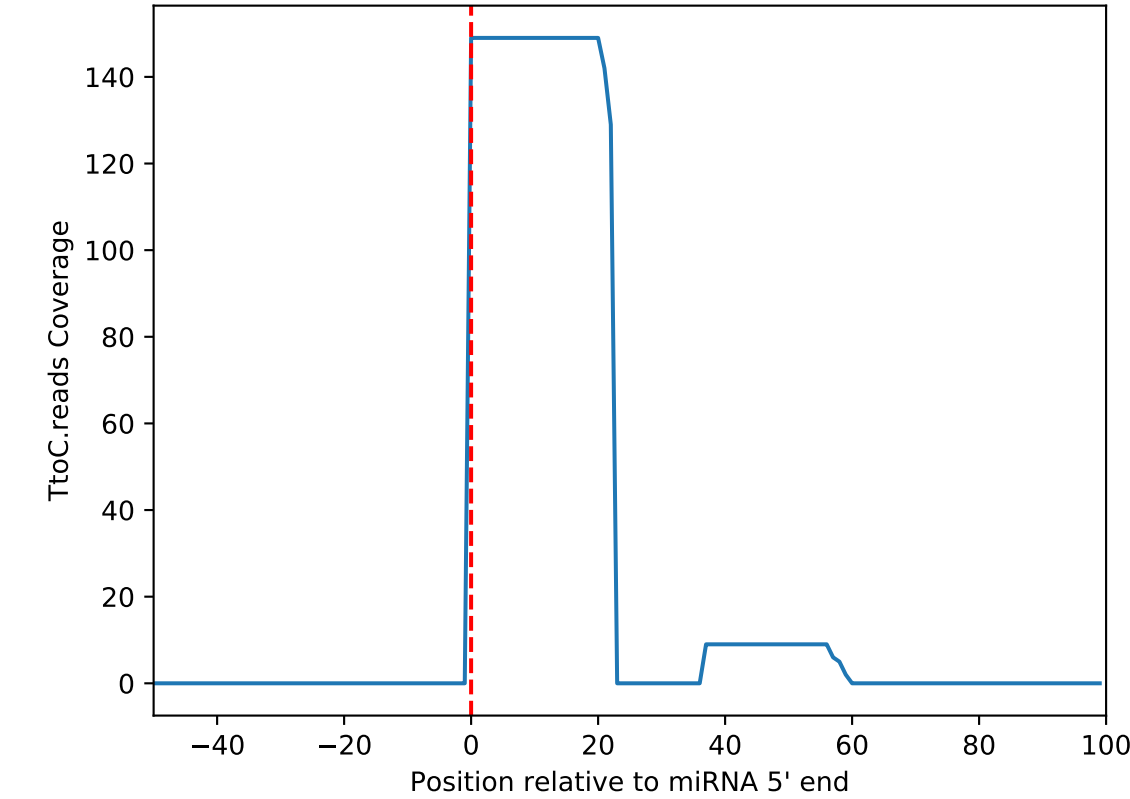

mir-311 (chr2R:20583946(-))

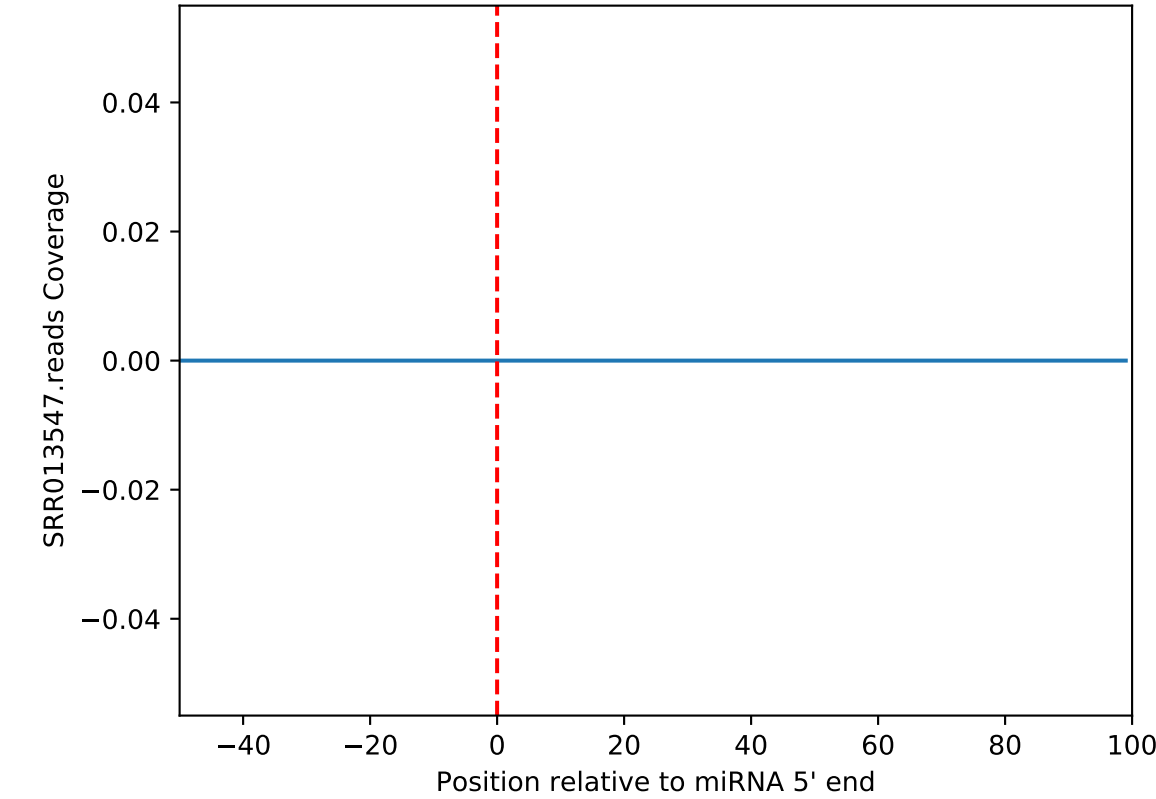

mir-311 (chr2R:20583946(-))

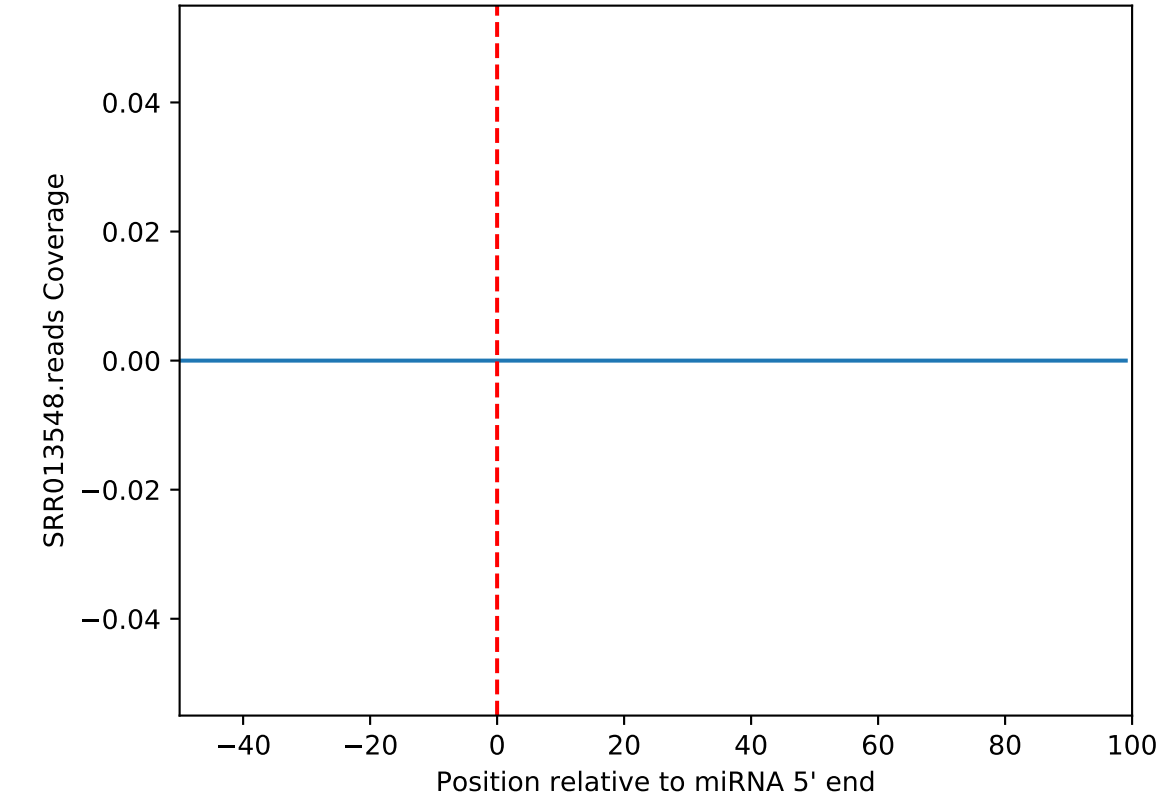



mir-274 (chr3L:11656937(+))

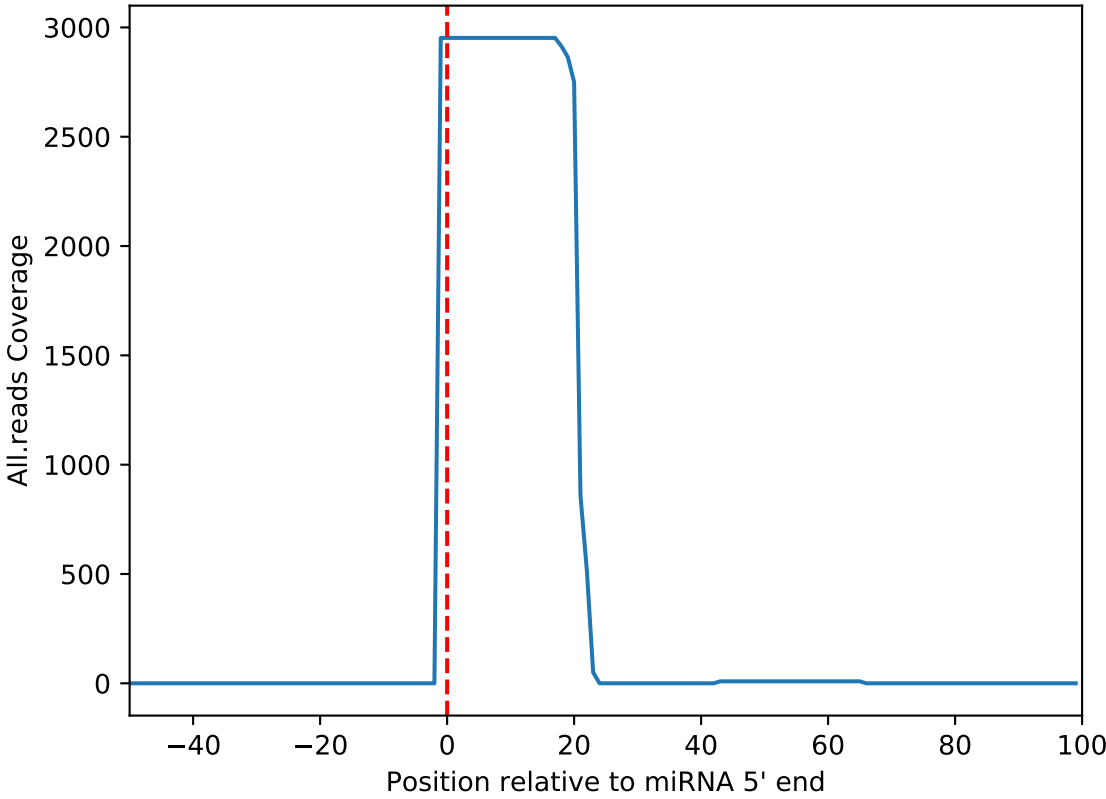

mir-274 (chr3L:11656937(+))

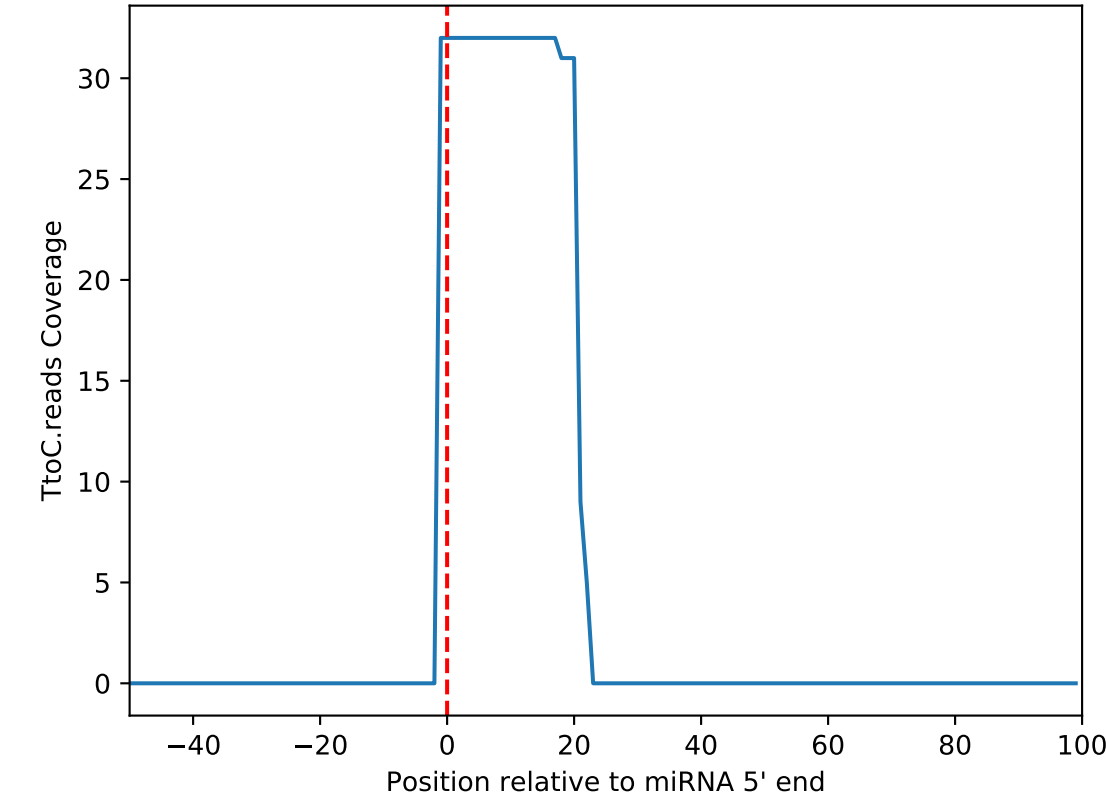

mir-274 (chr3L:11656937(+))

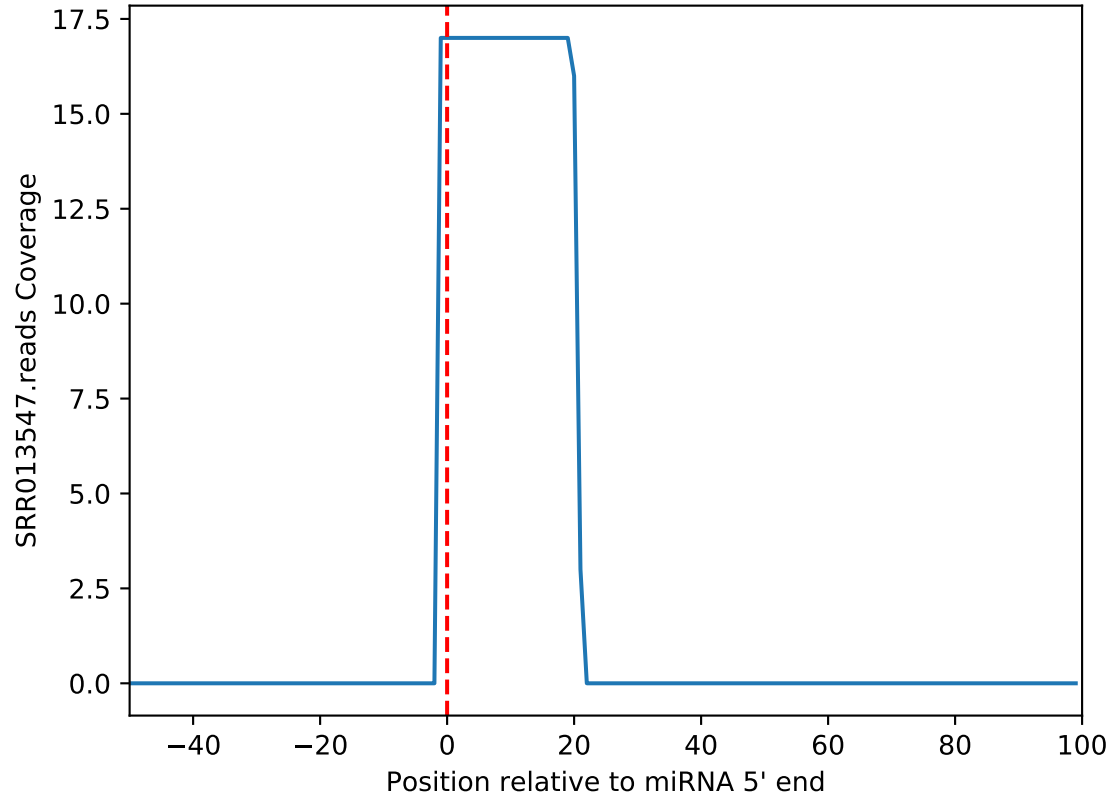

mir-274 (chr3L:11656937(+))

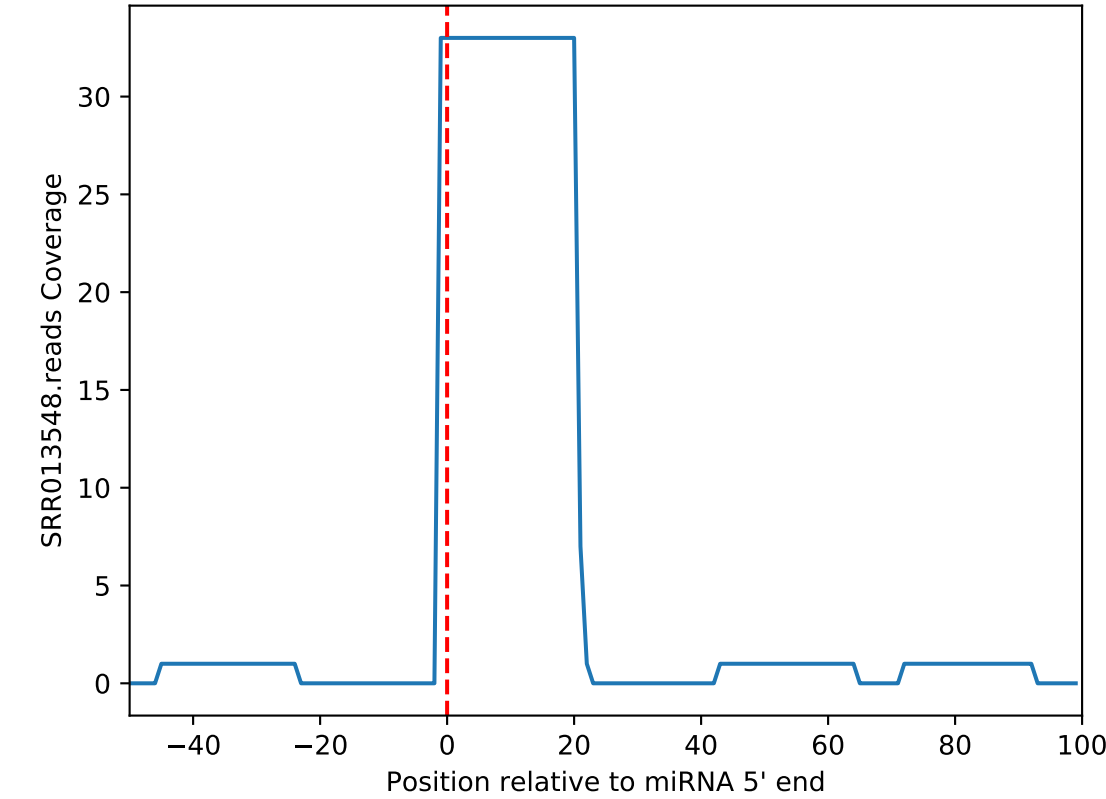

mir-92b (chr3R:25651416(+))

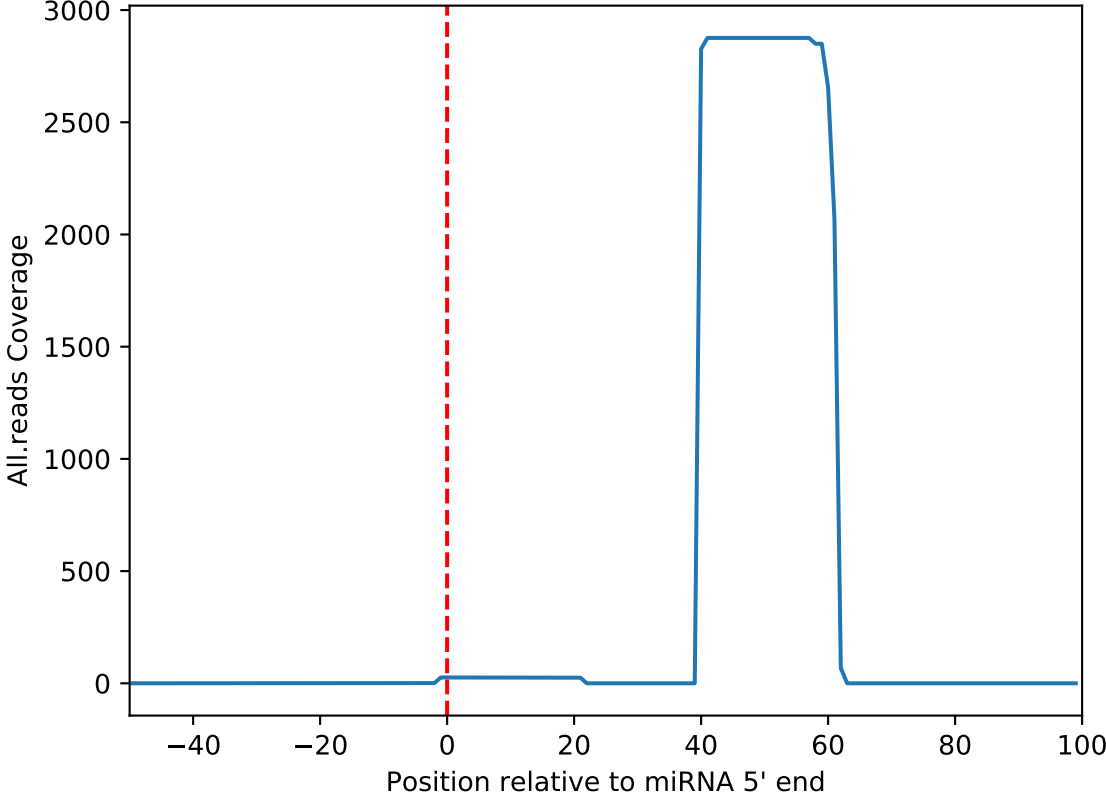

mir-92b (chr3R:25651416(+))

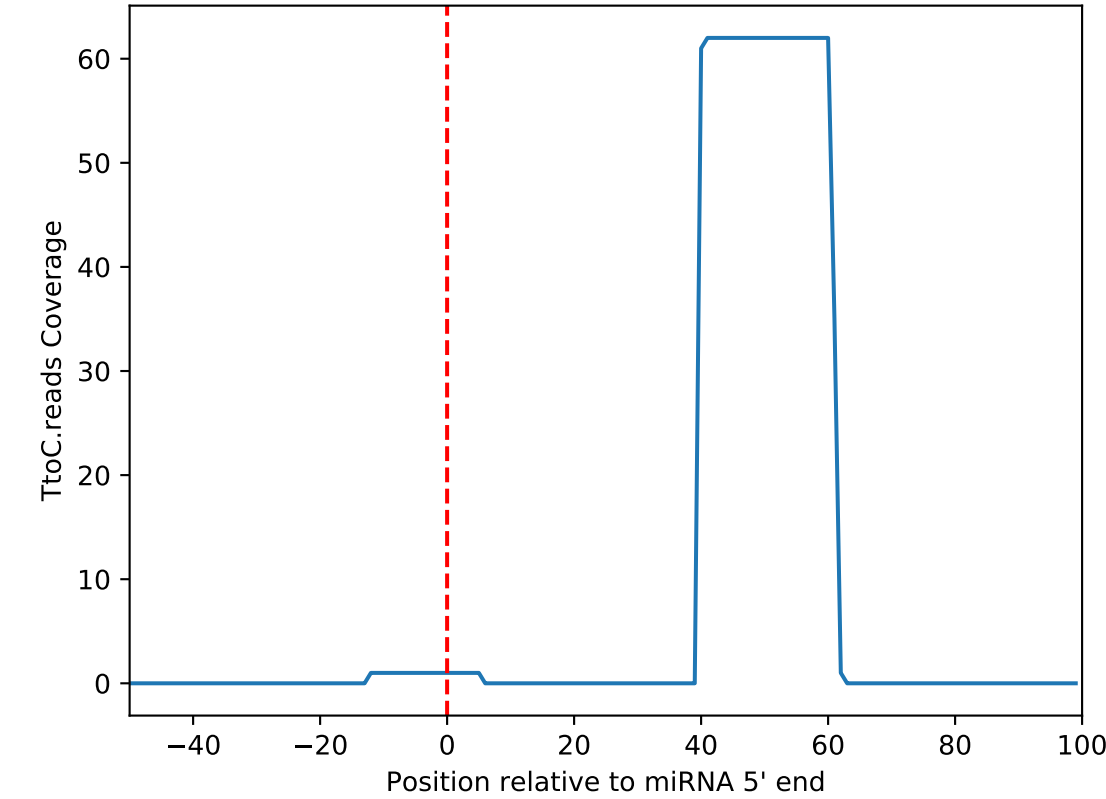

mir-92b (chr3R:25651416(+))

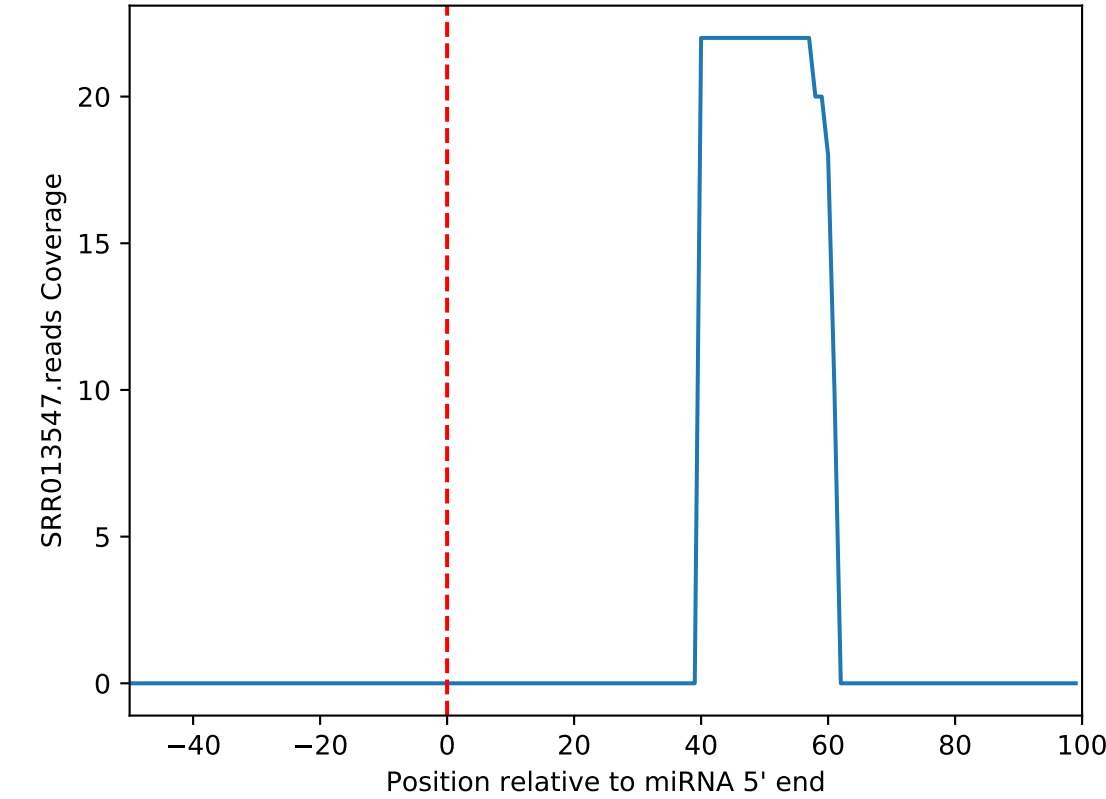

mir-92b (chr3R:25651416(+))

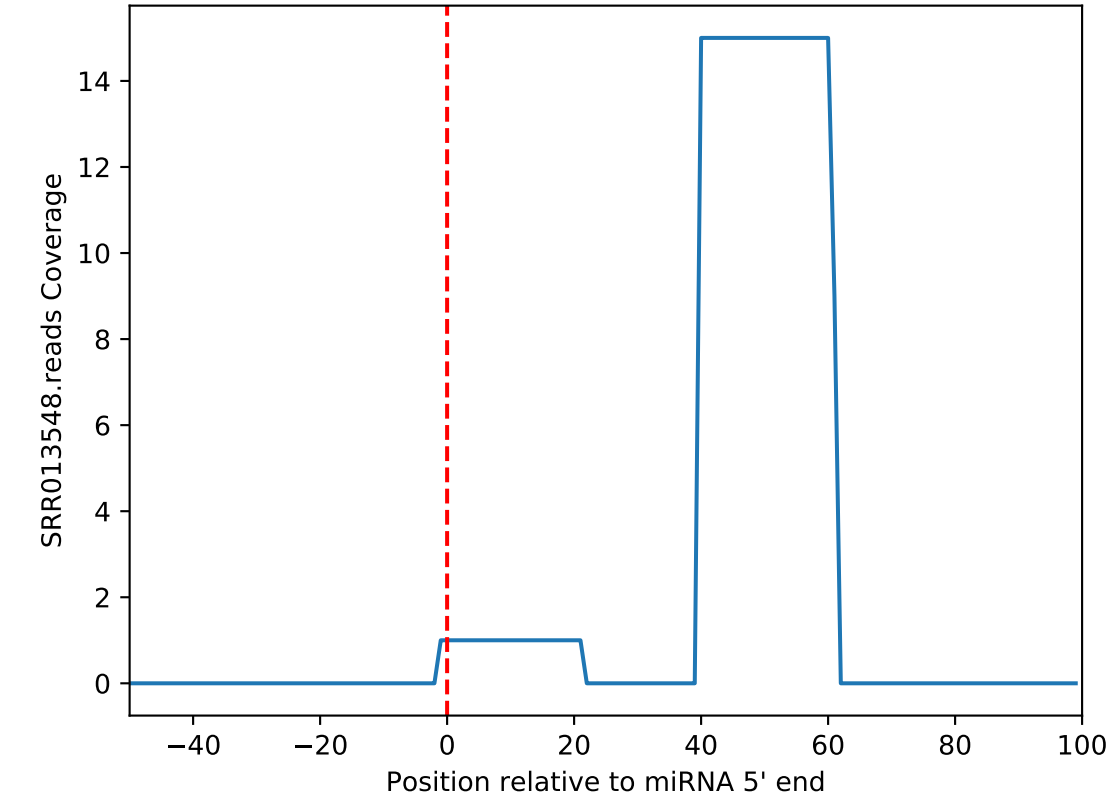

mir-976 (chrX:19558917(+))

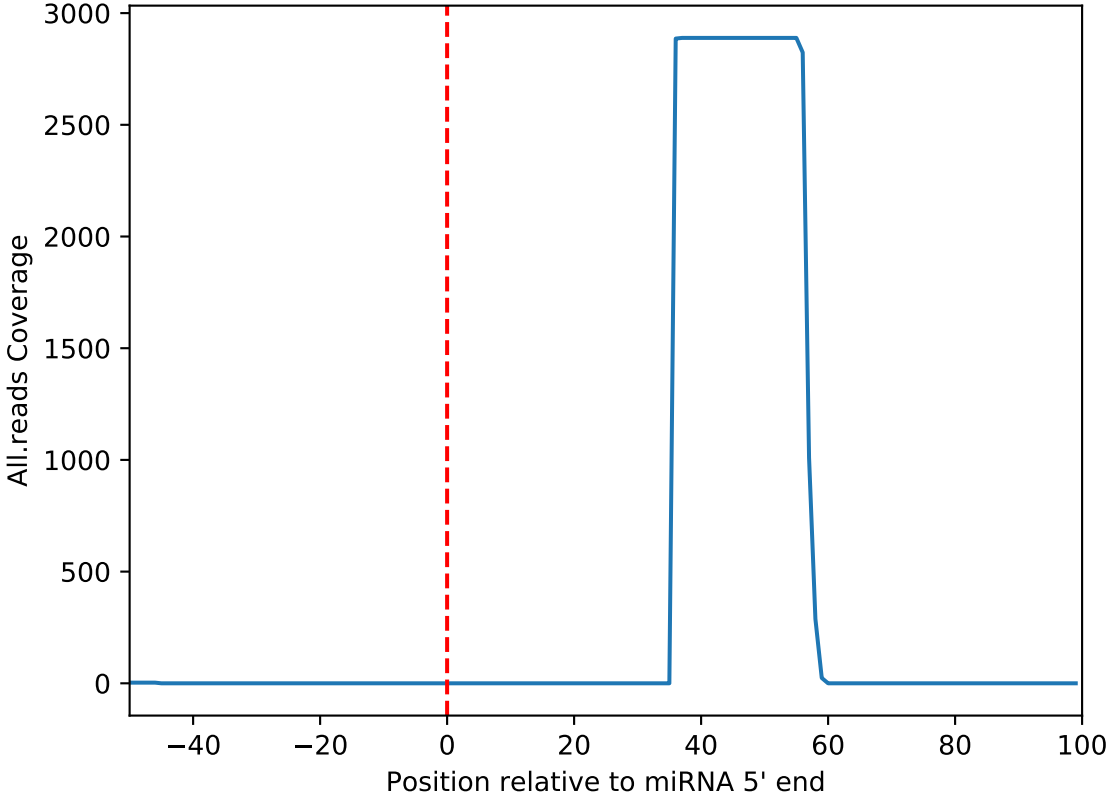

mir-976 (chrX:19558917(+))

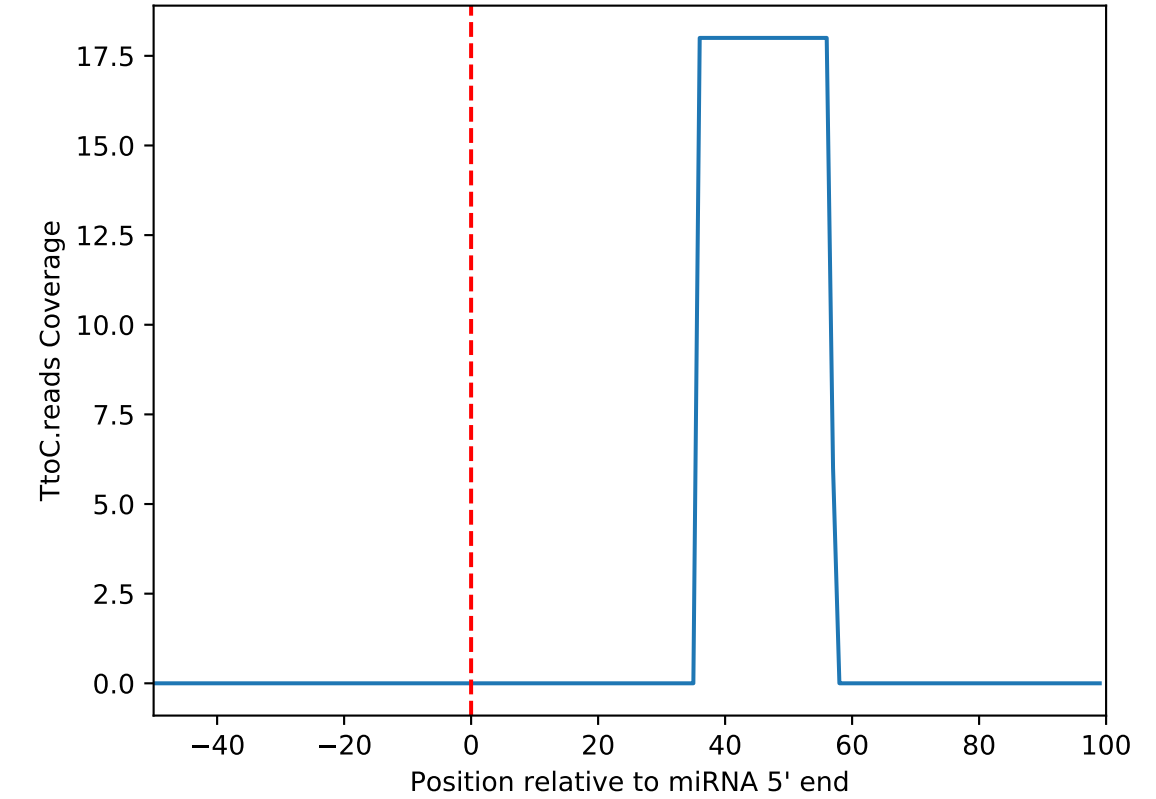

mir-976 (chrX:19558917(+))

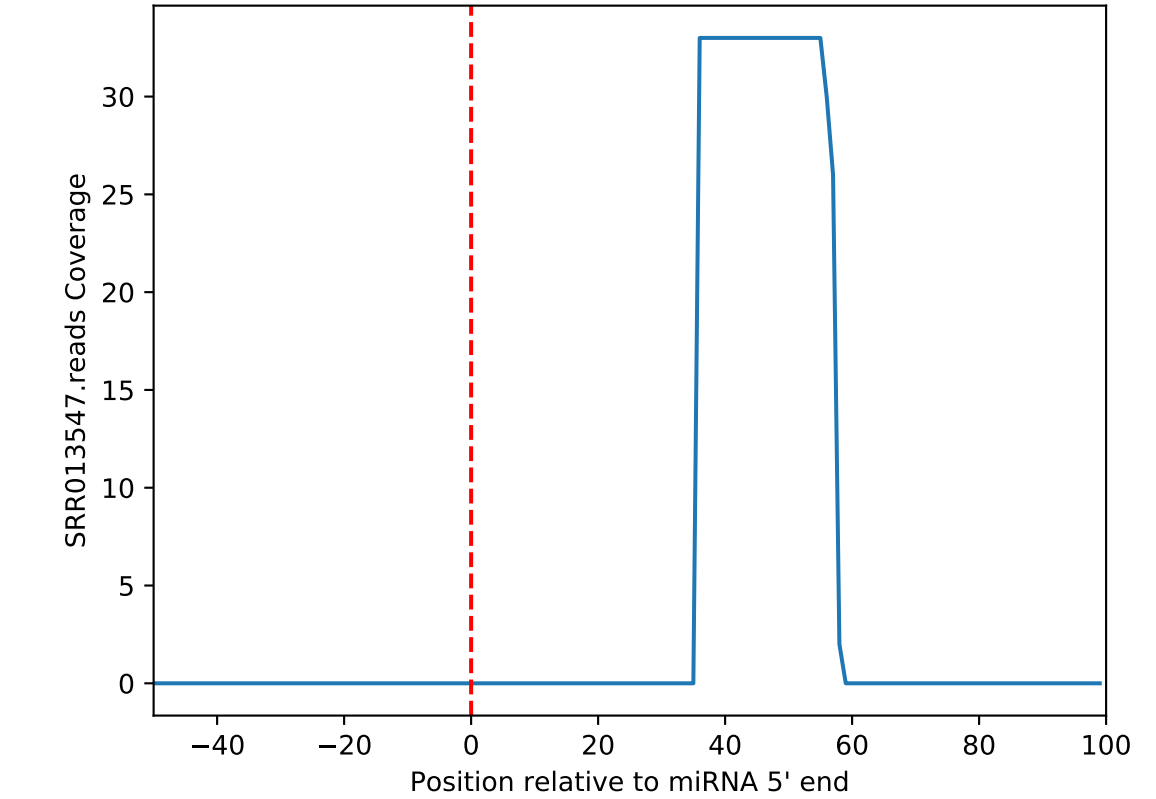

mir-976 (chrX:19558917(+))

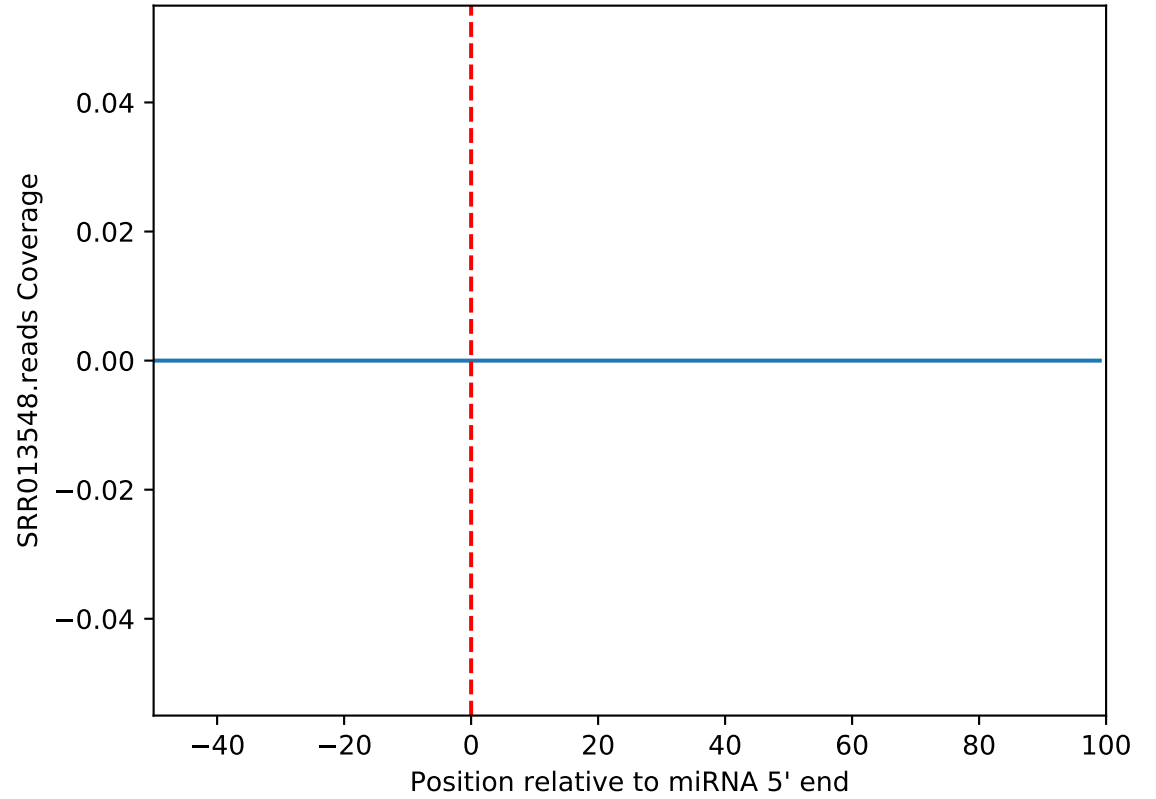

mir-125 (chr2L:18472343(+))

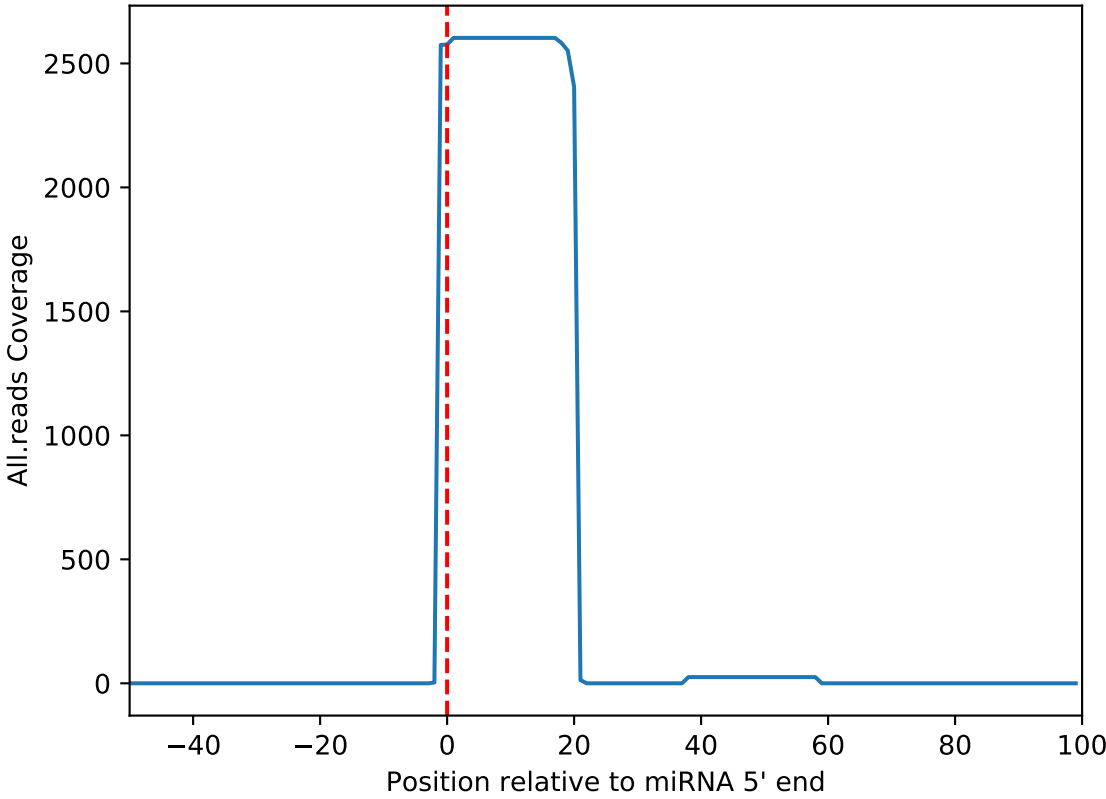

mir-125 (chr2L:18472343(+))

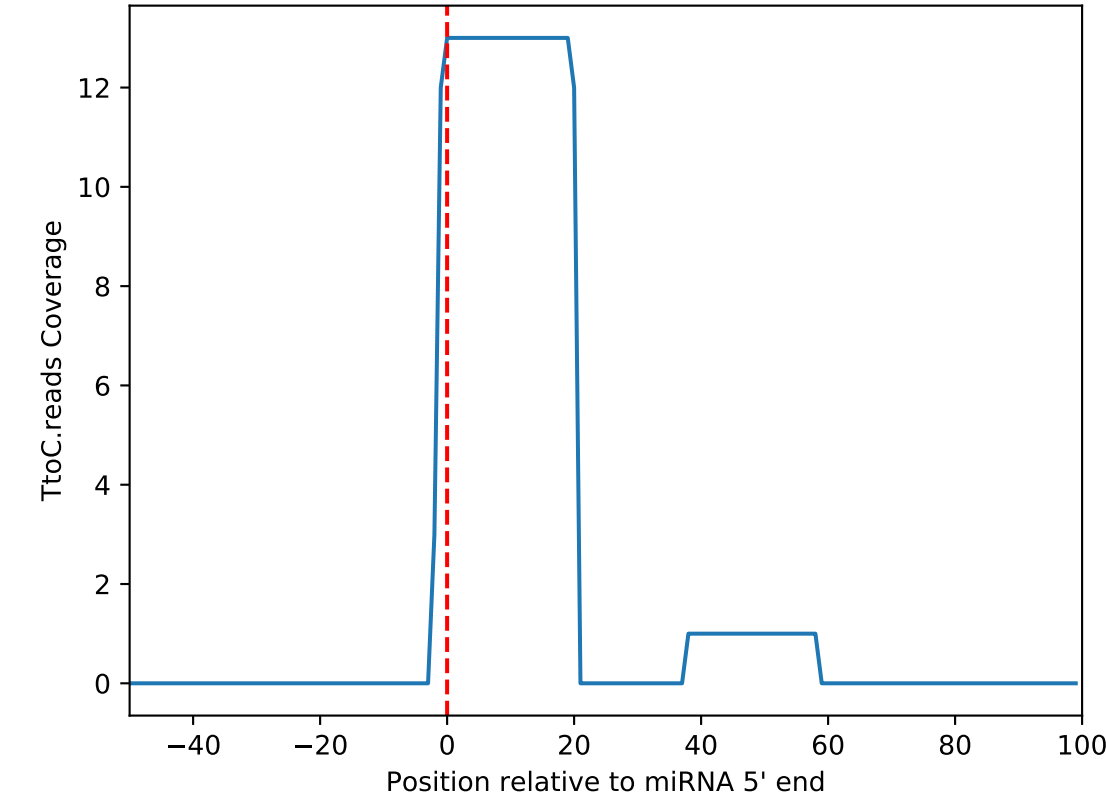

mir-125 (chr2L:18472343(+))

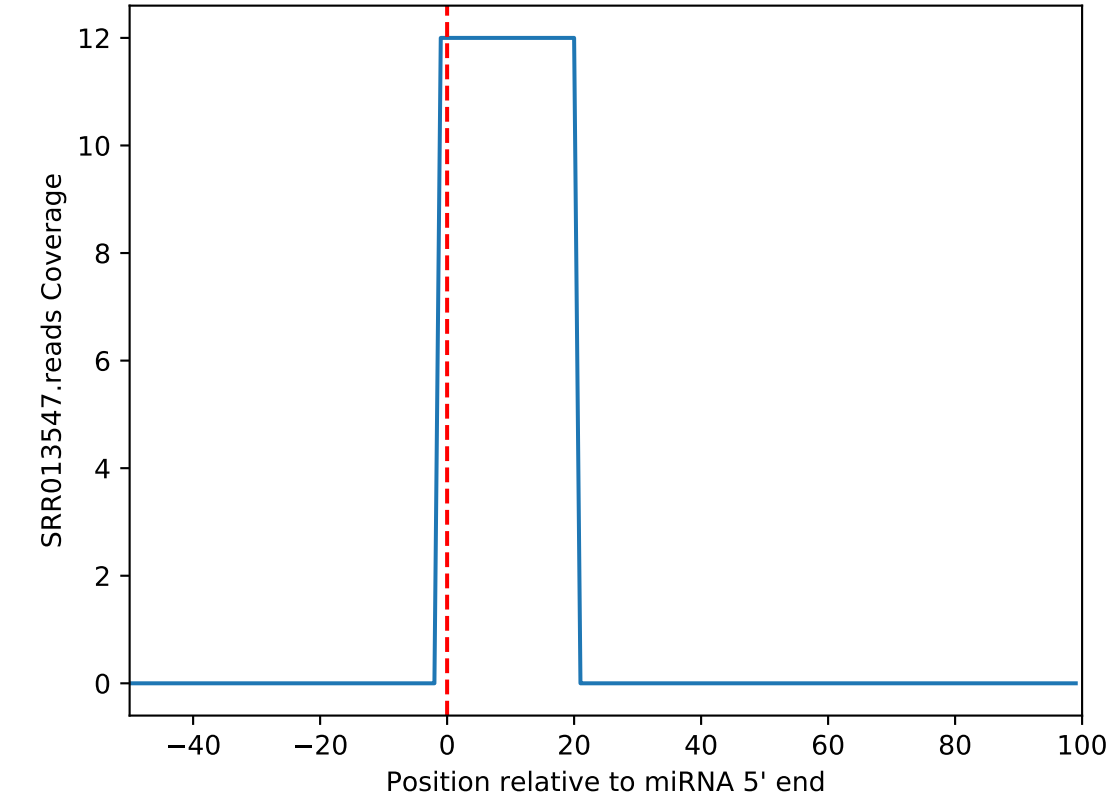

mir-125 (chr2L:18472343(+))

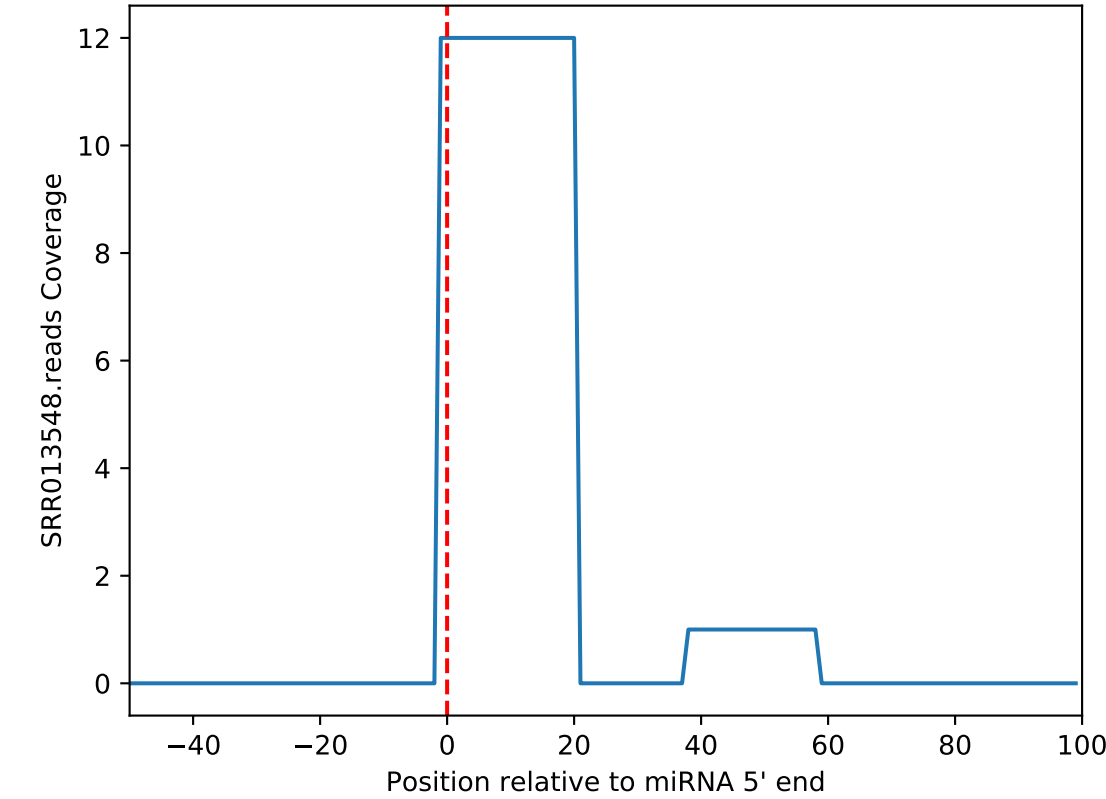

mir-79 (chr2L:16698572(+))

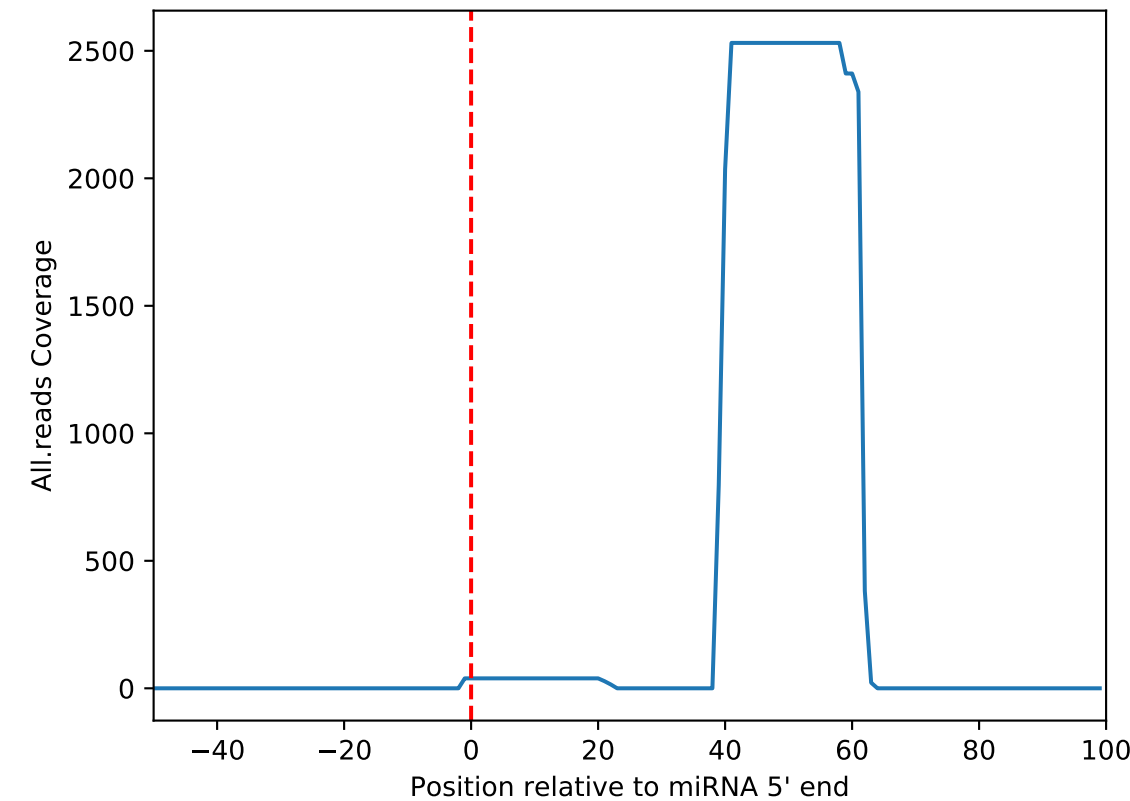

mir-79 (chr2L:16698572(+))

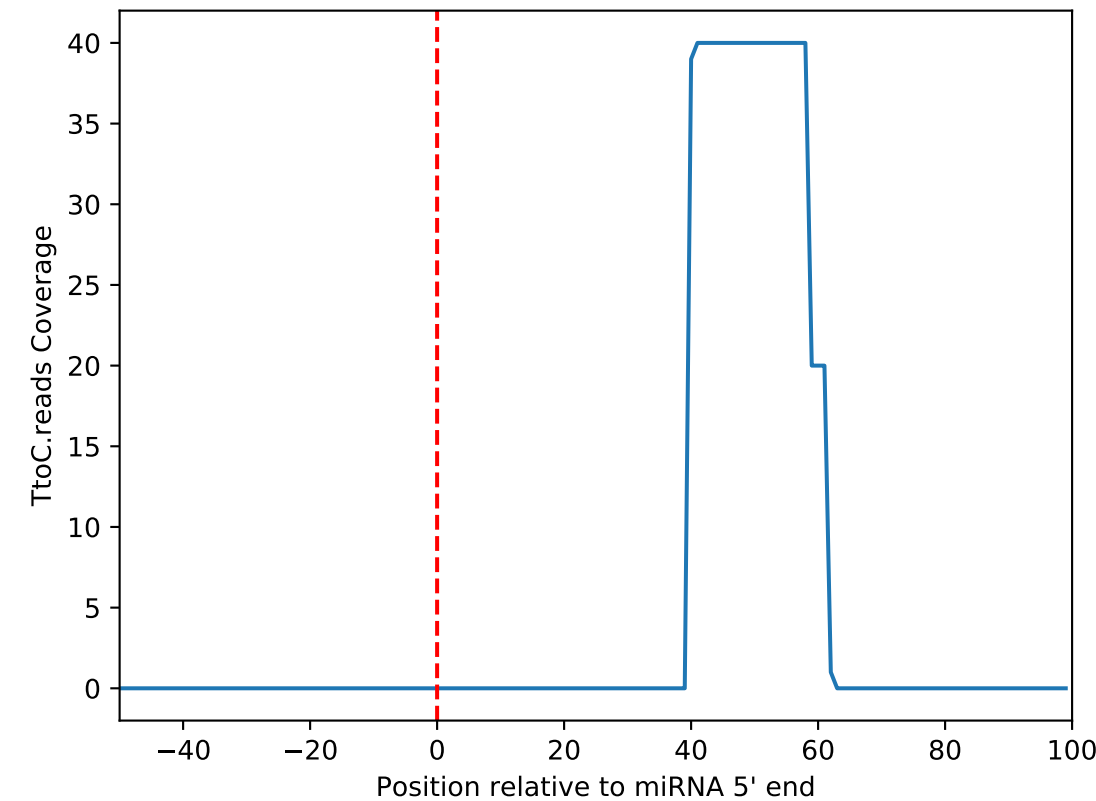

mir-79 (chr2L:16698572(+))

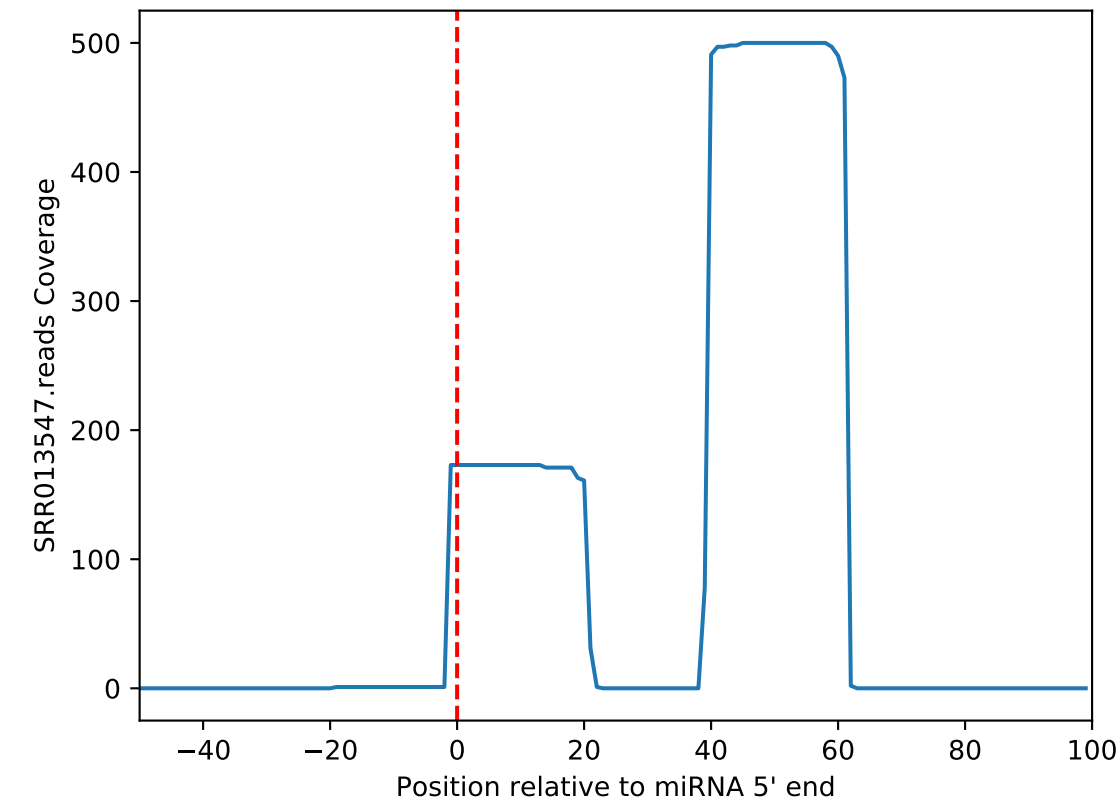

mir-79 (chr2L:16698572(+))

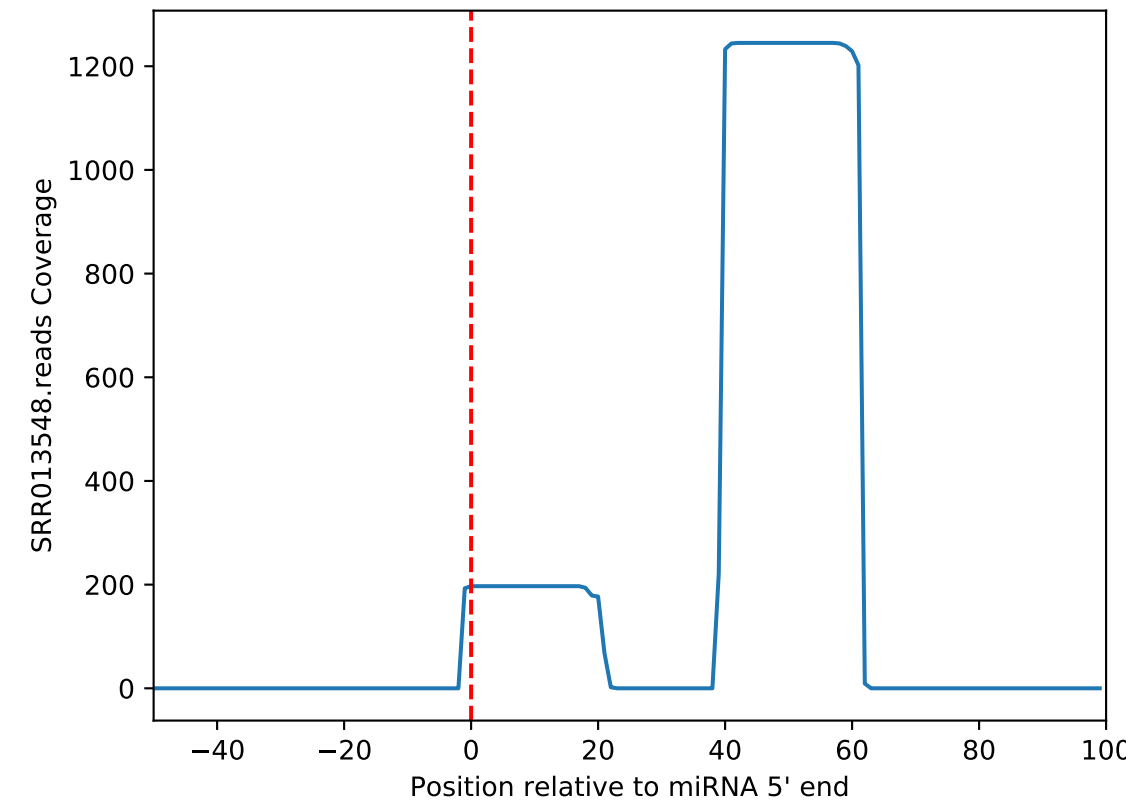

mir-960 (chr2L:5641081(+))

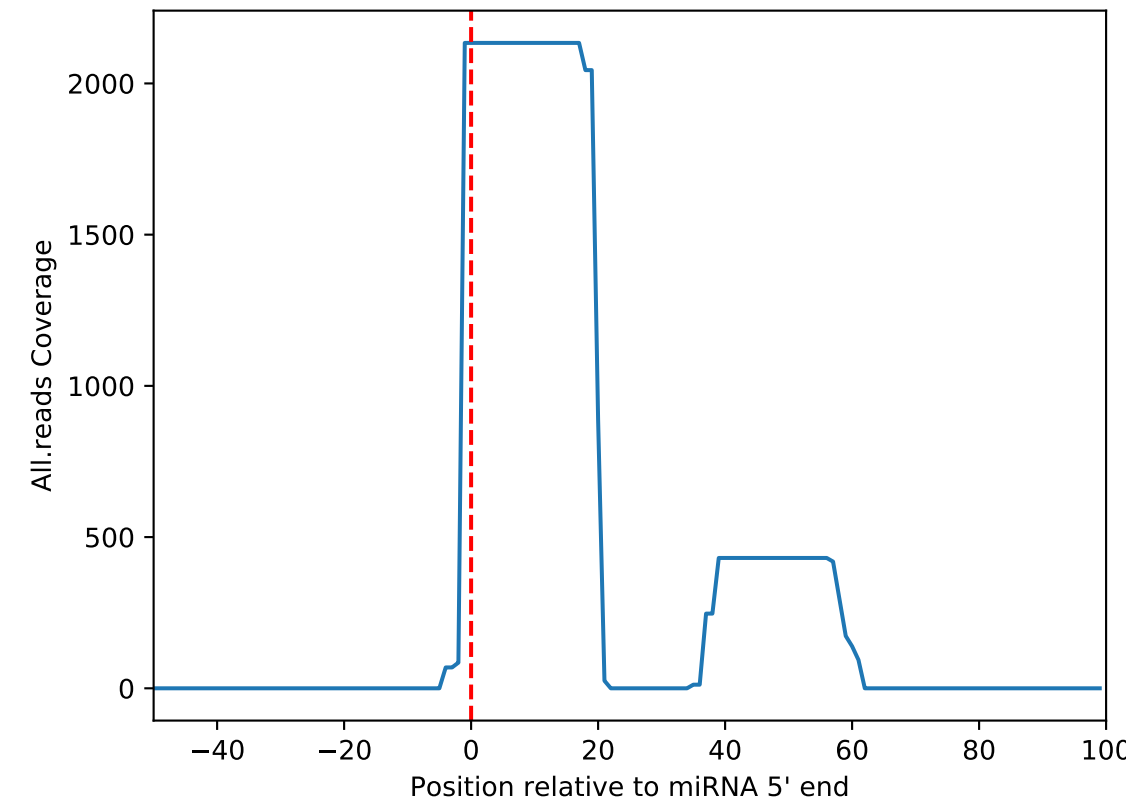

mir-960 (chr2L:5641081(+))

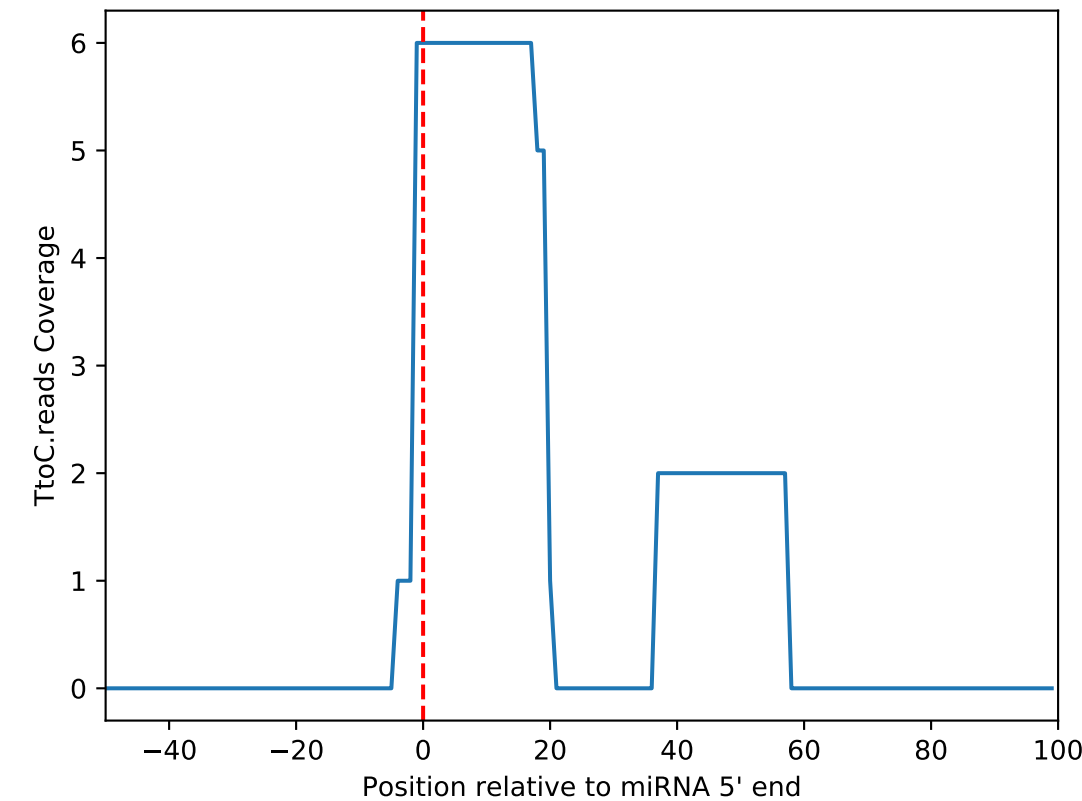

mir-960 (chr2L:5641081(+))

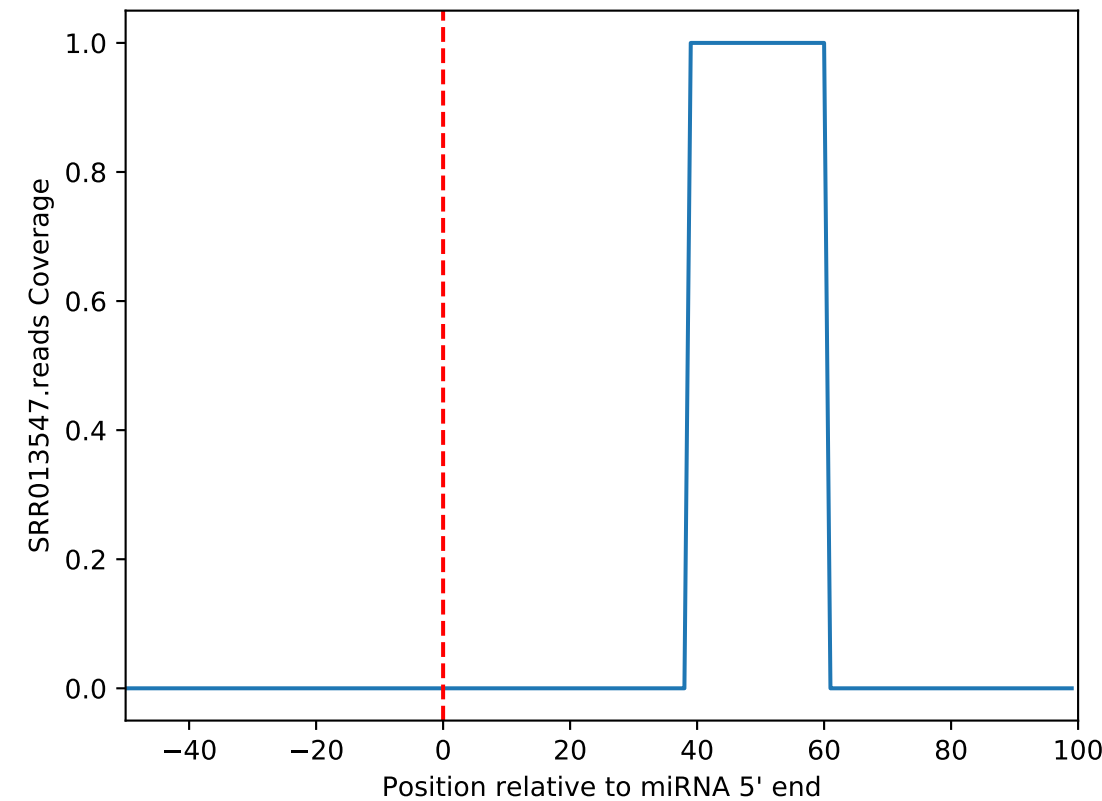

mir-960 (chr2L:5641081(+))

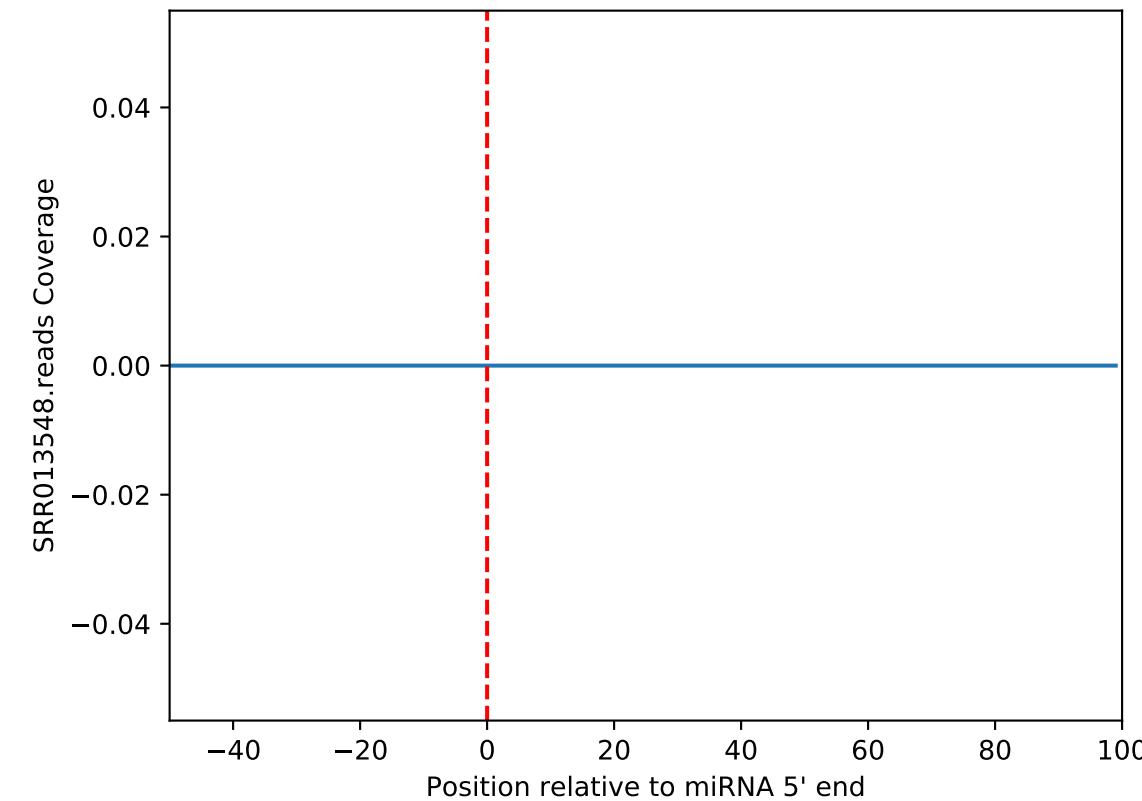

mir-13b-1 (chr3R:15417470(-))

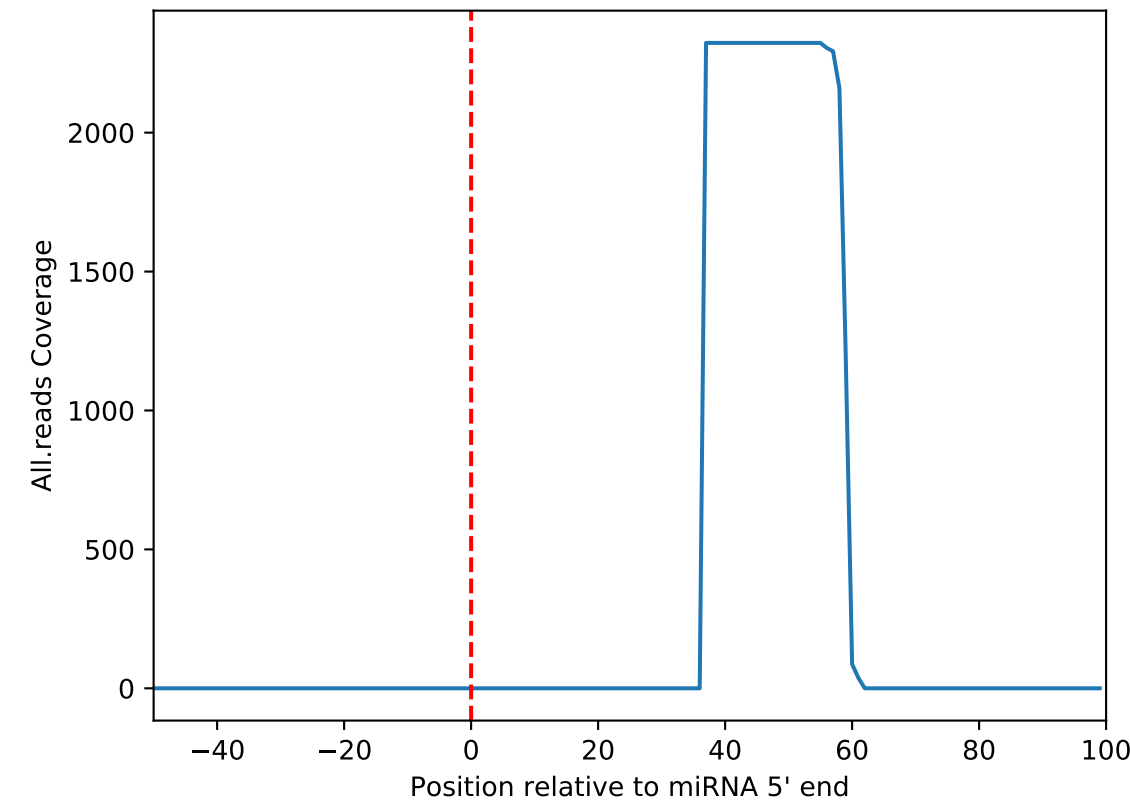

mir-13b-1 (chr3R:15417470(-))

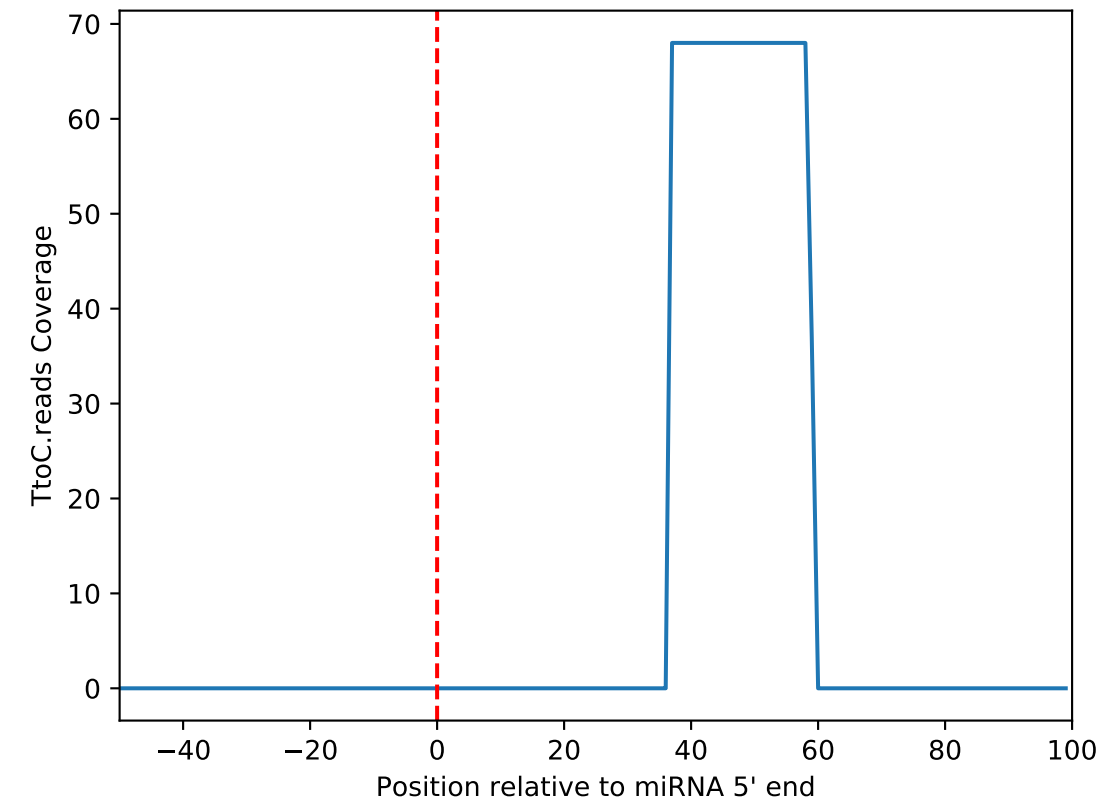

mir-13b-1 (chr3R:15417470(-))

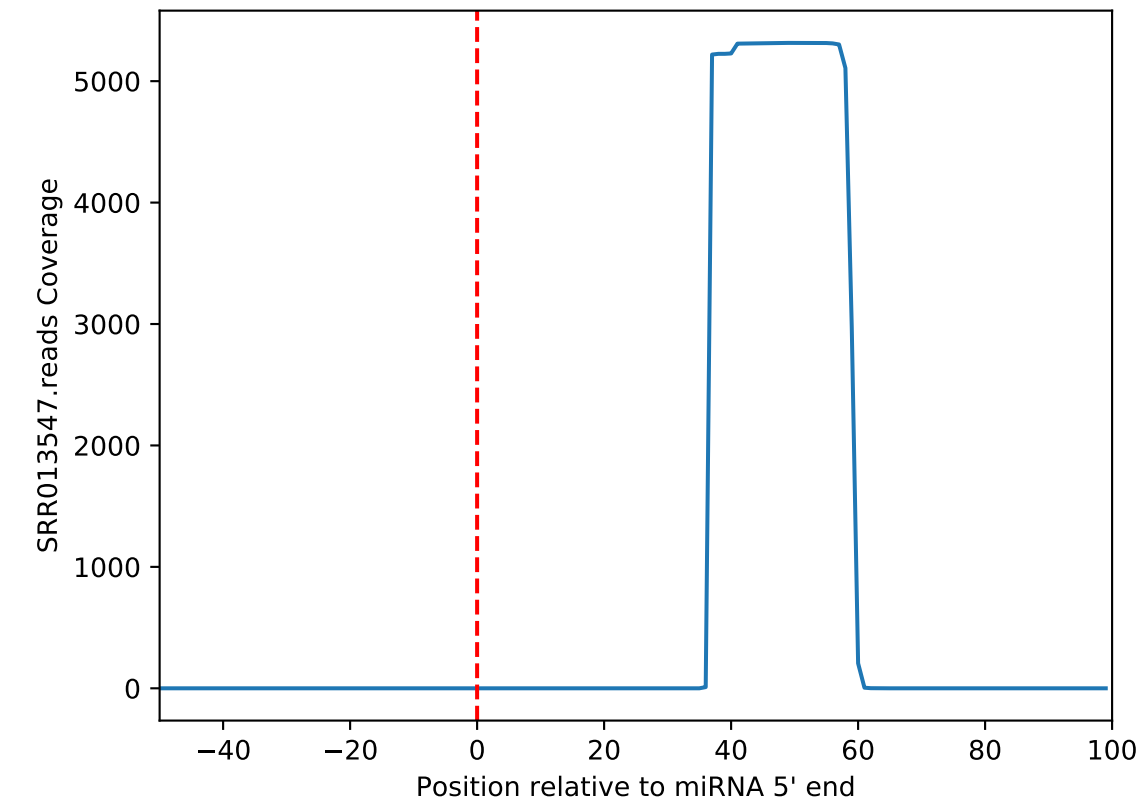

mir-13b-1 (chr3R:15417470(-))

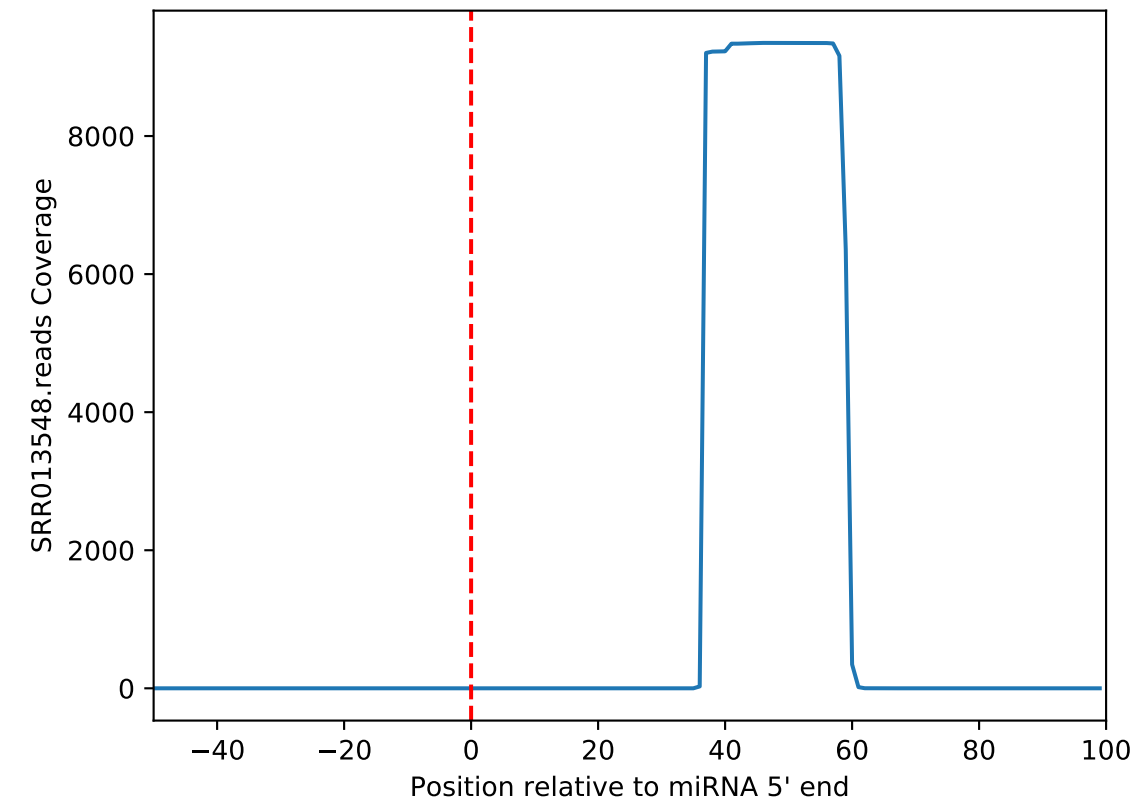

mir-983-2 (chrX:4368561(-))

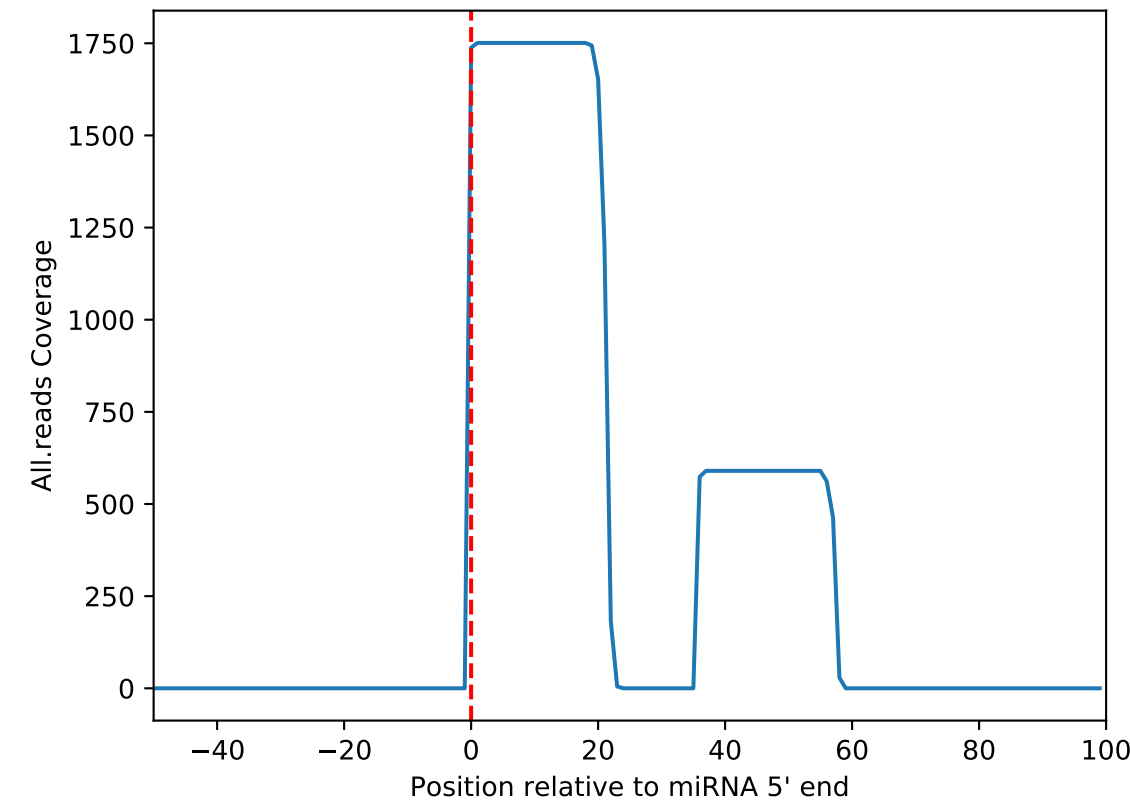

mir-983-2 (chrX:4368561(-))

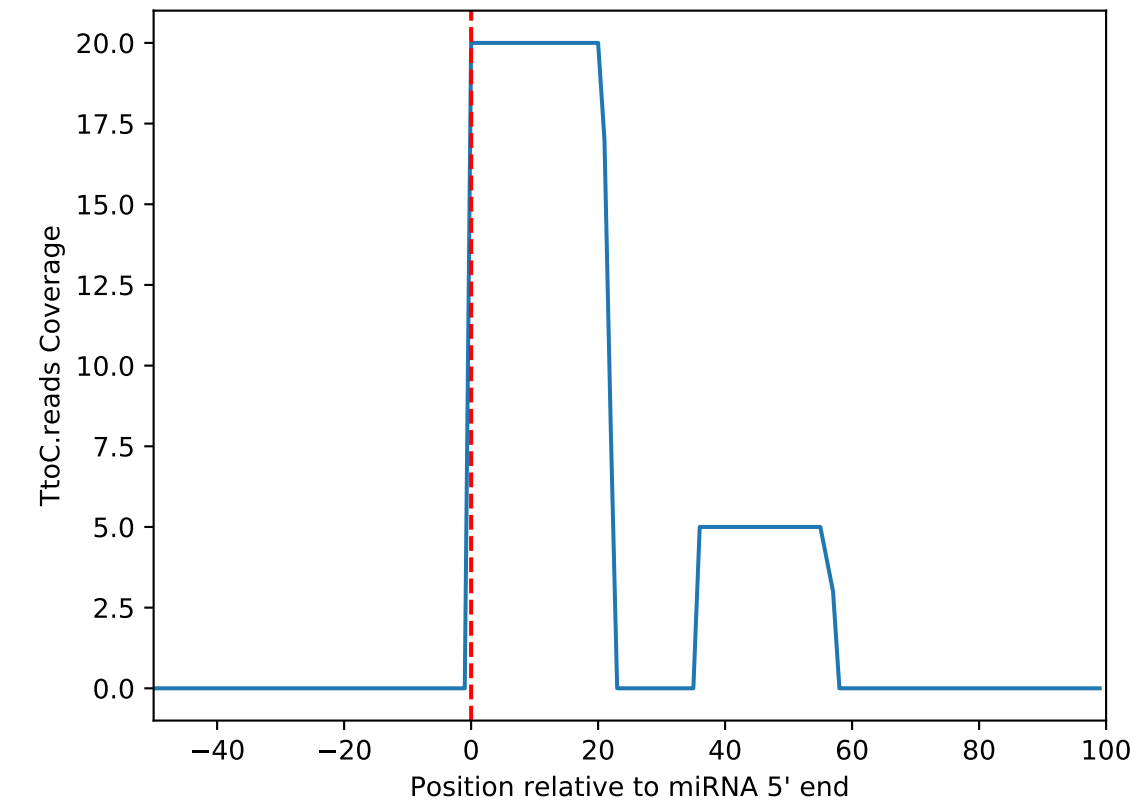

mir-983-2 (chrX:4368561(-))

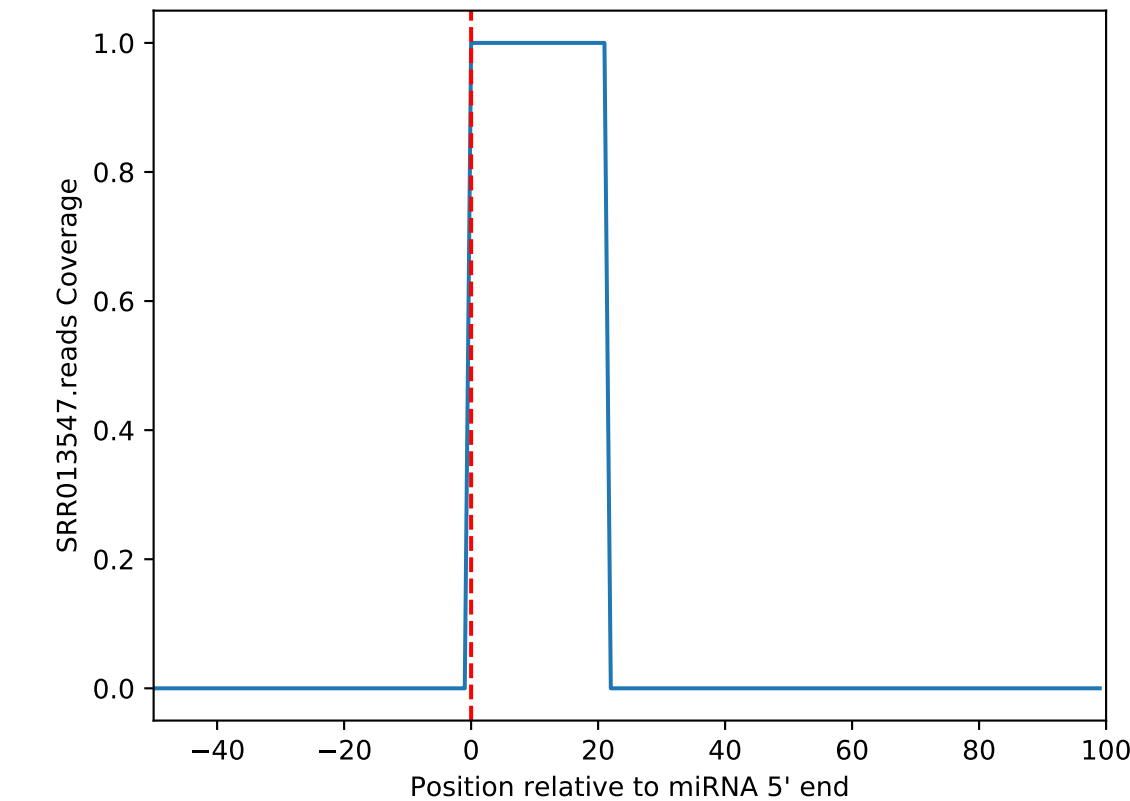

mir-983-2 (chrX:4368561(-))

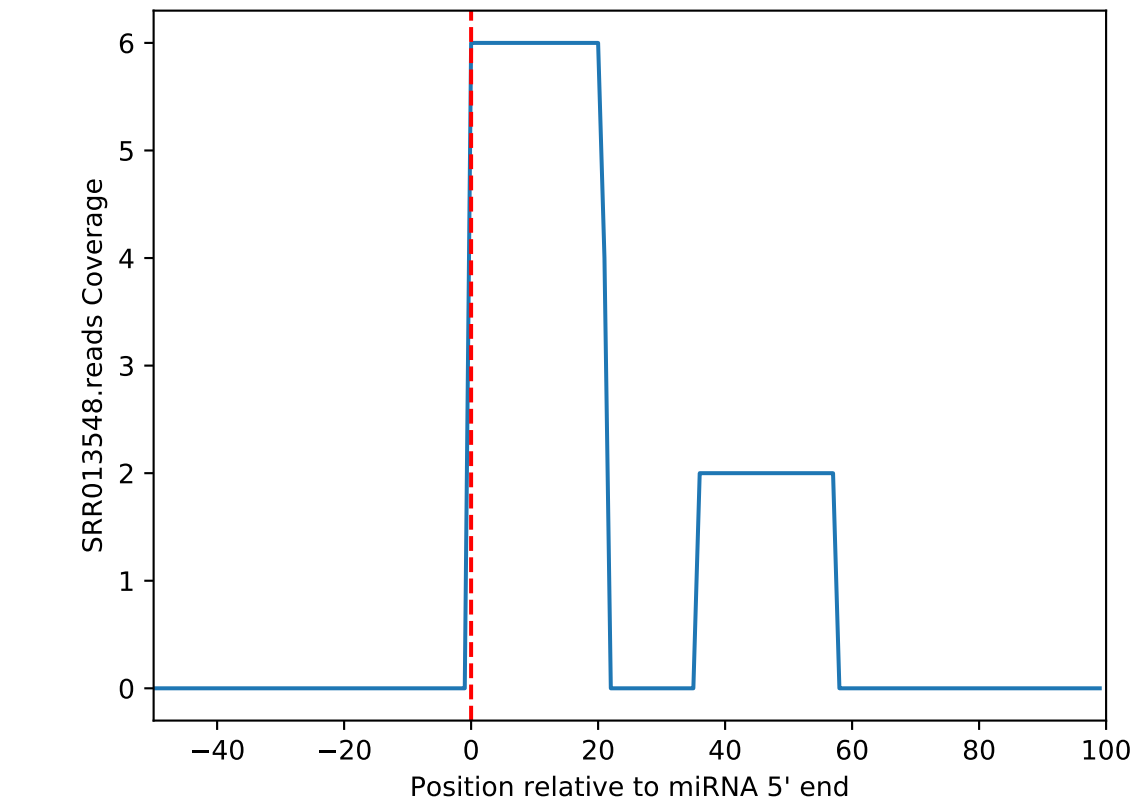



mir-983-1 (chrX:4368382(-))

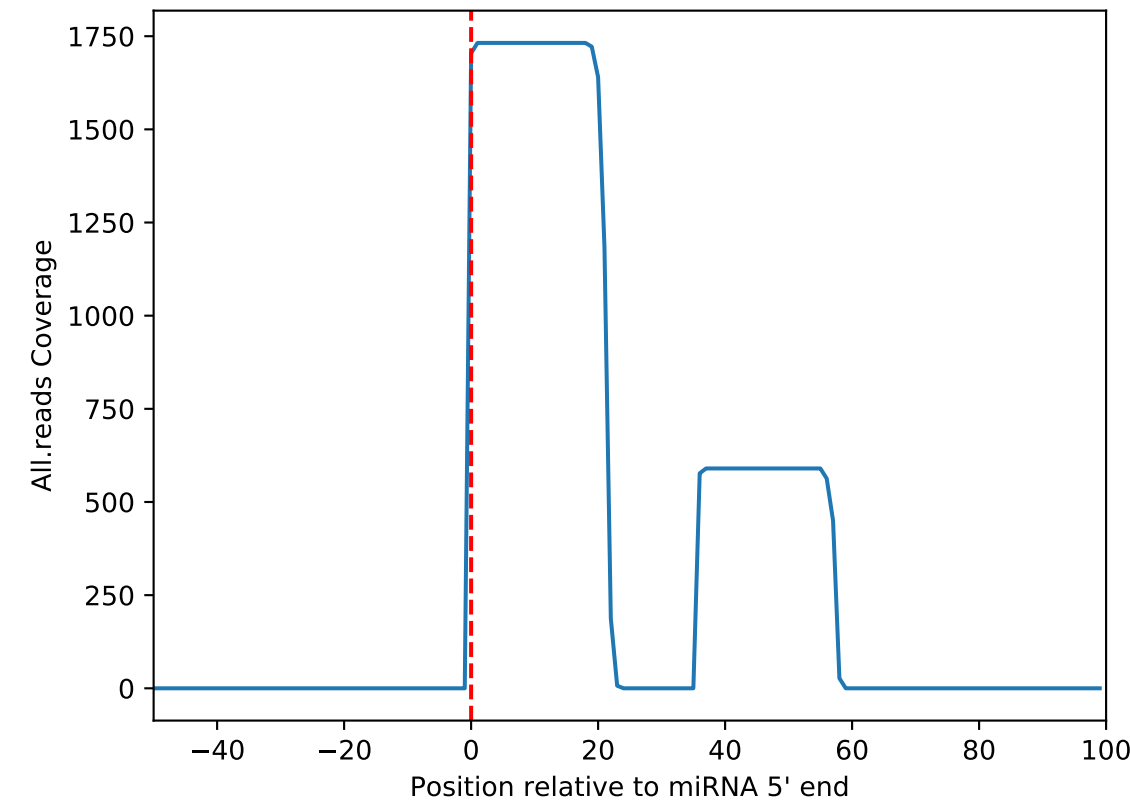

mir-983-1 (chrX:4368382(-))

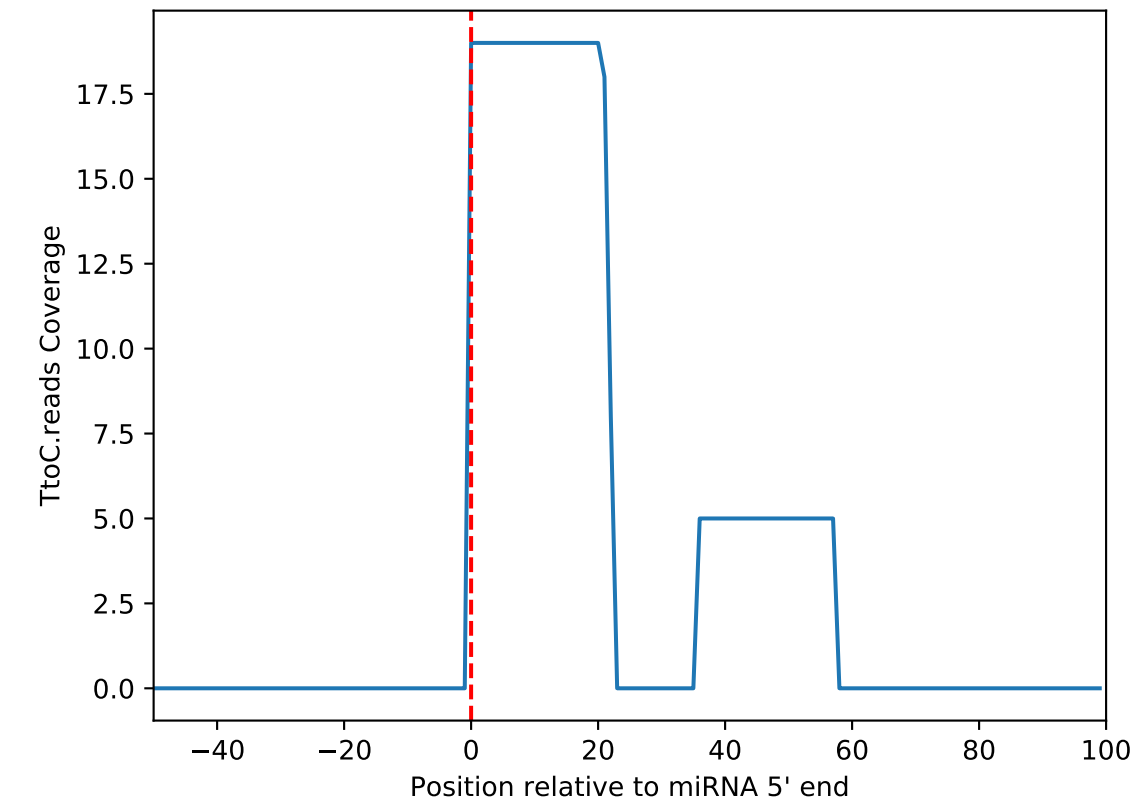

mir-983-1 (chrX:4368382(-))

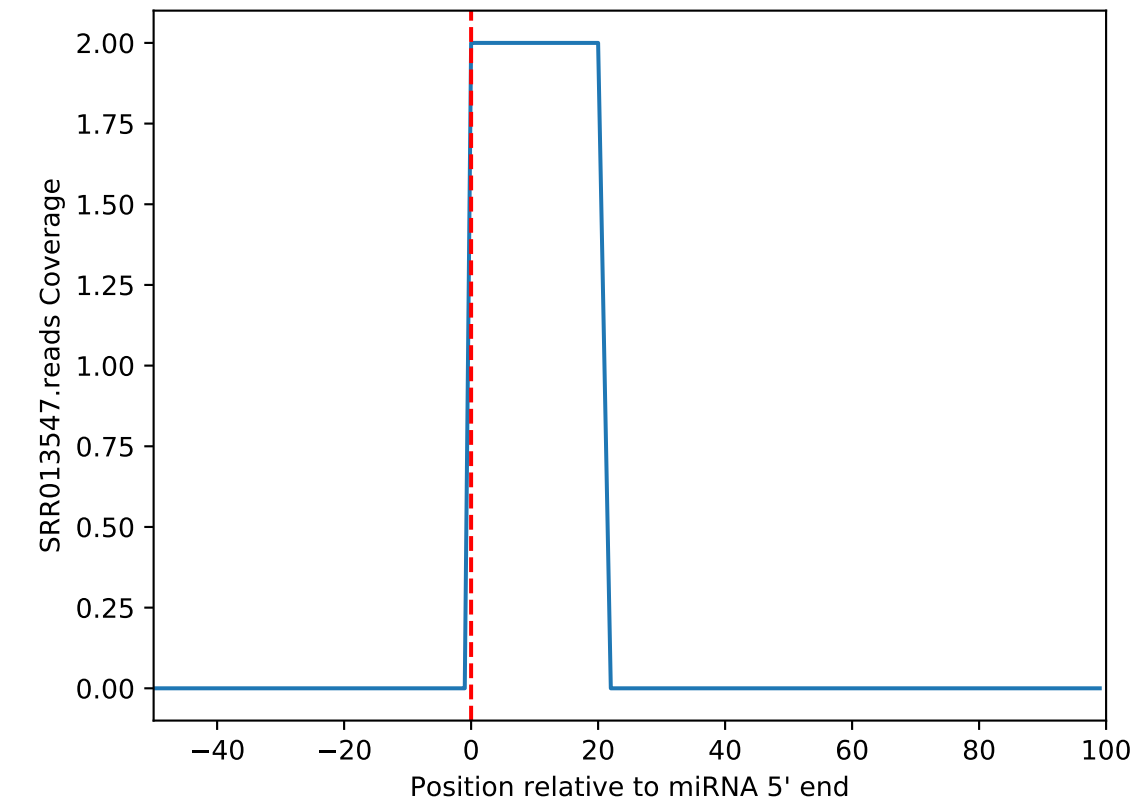

mir-983-1 (chrX:4368382(-))

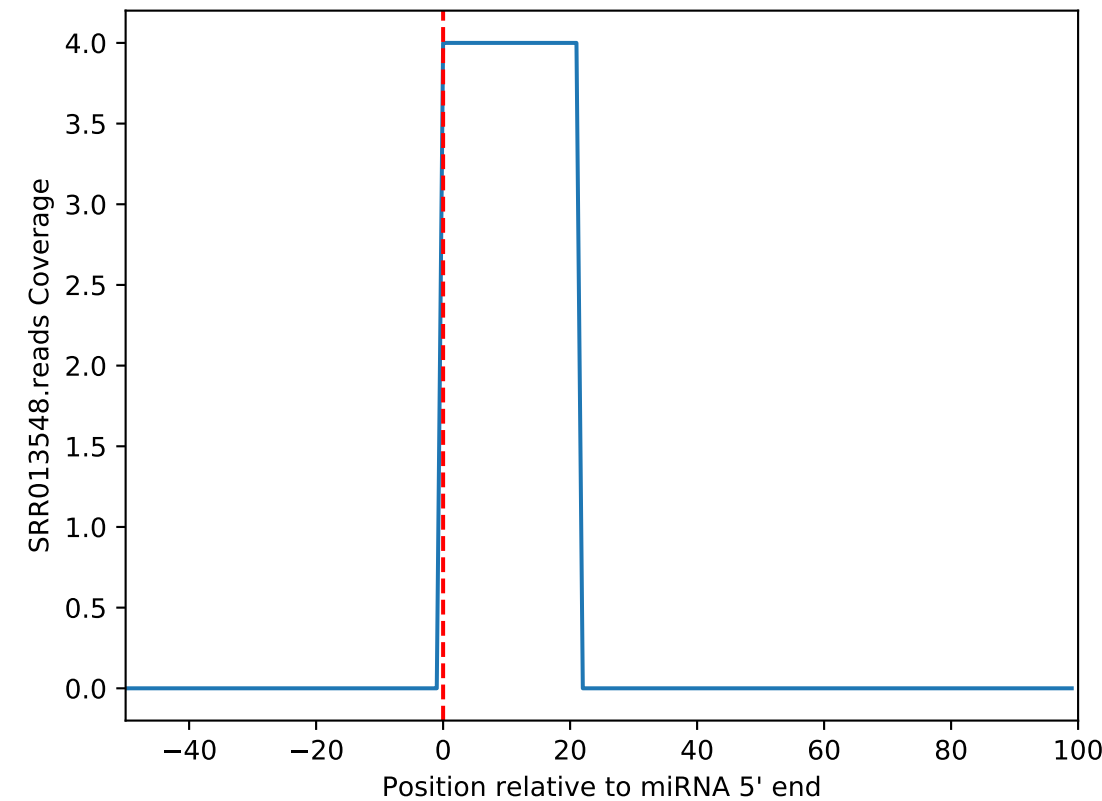

mir-963 (chr2L:5642005(+))

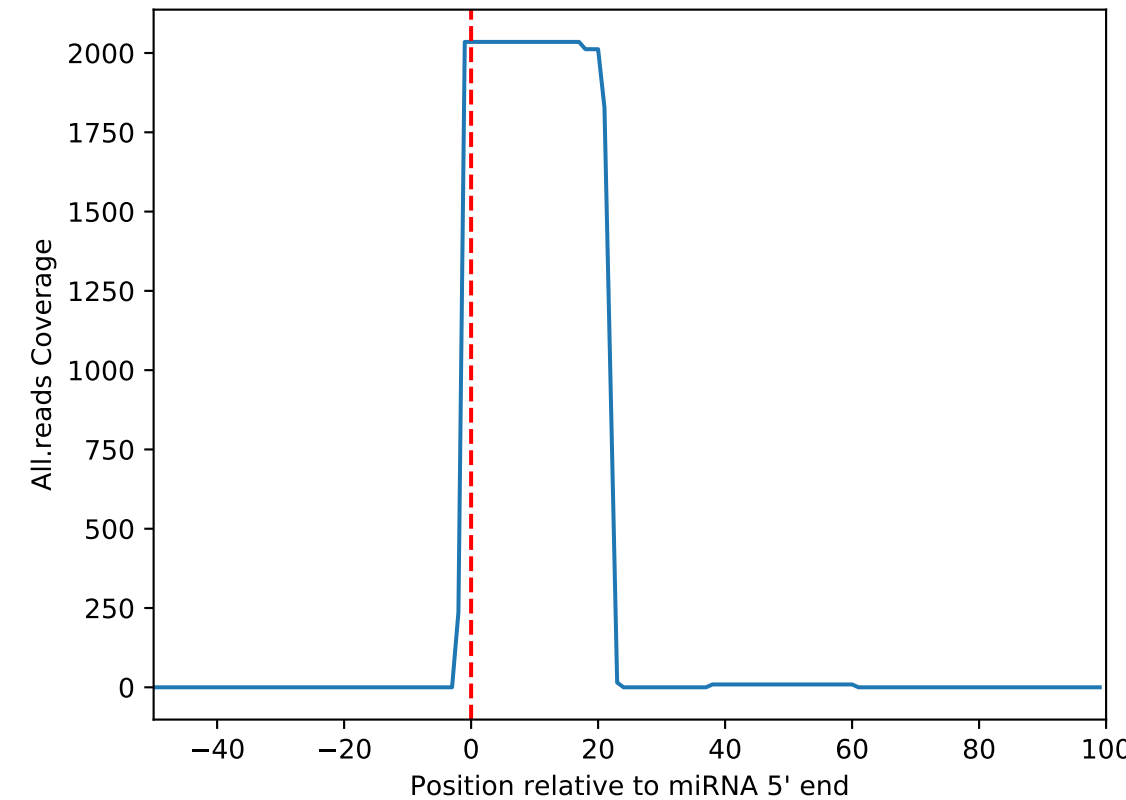

mir-963 (chr2L:5642005(+))

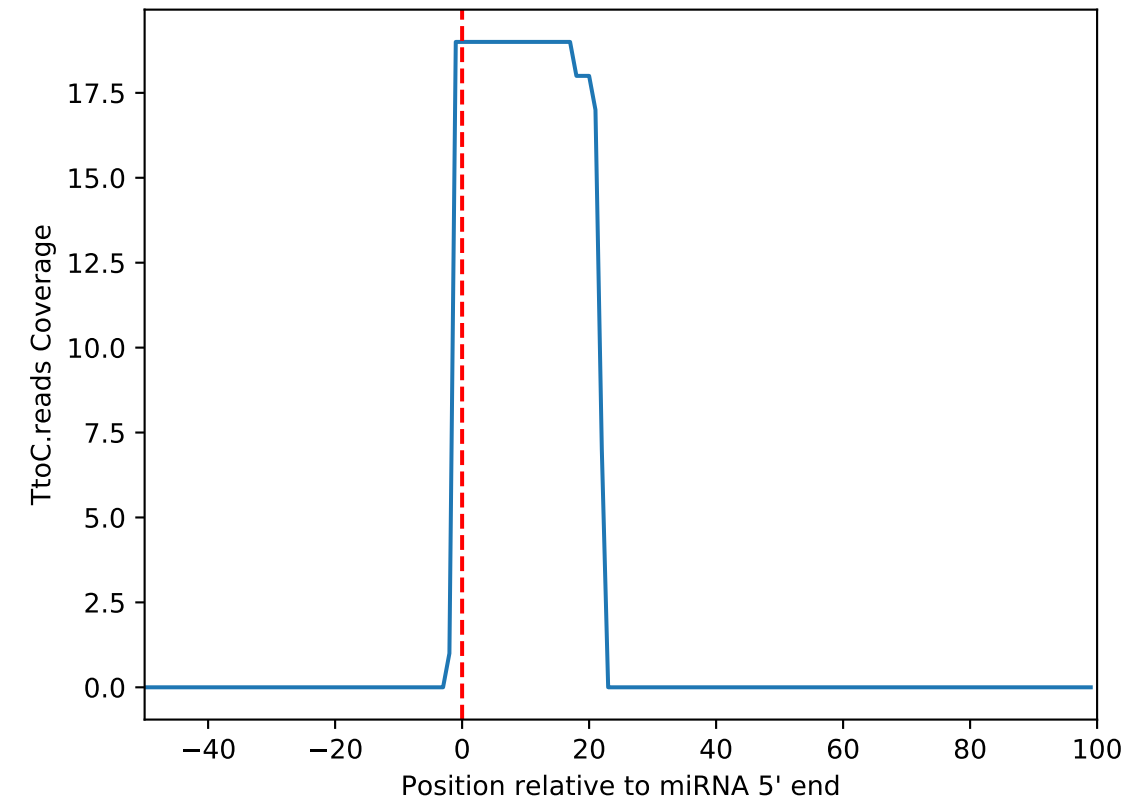

mir-963 (chr2L:5642005(+))

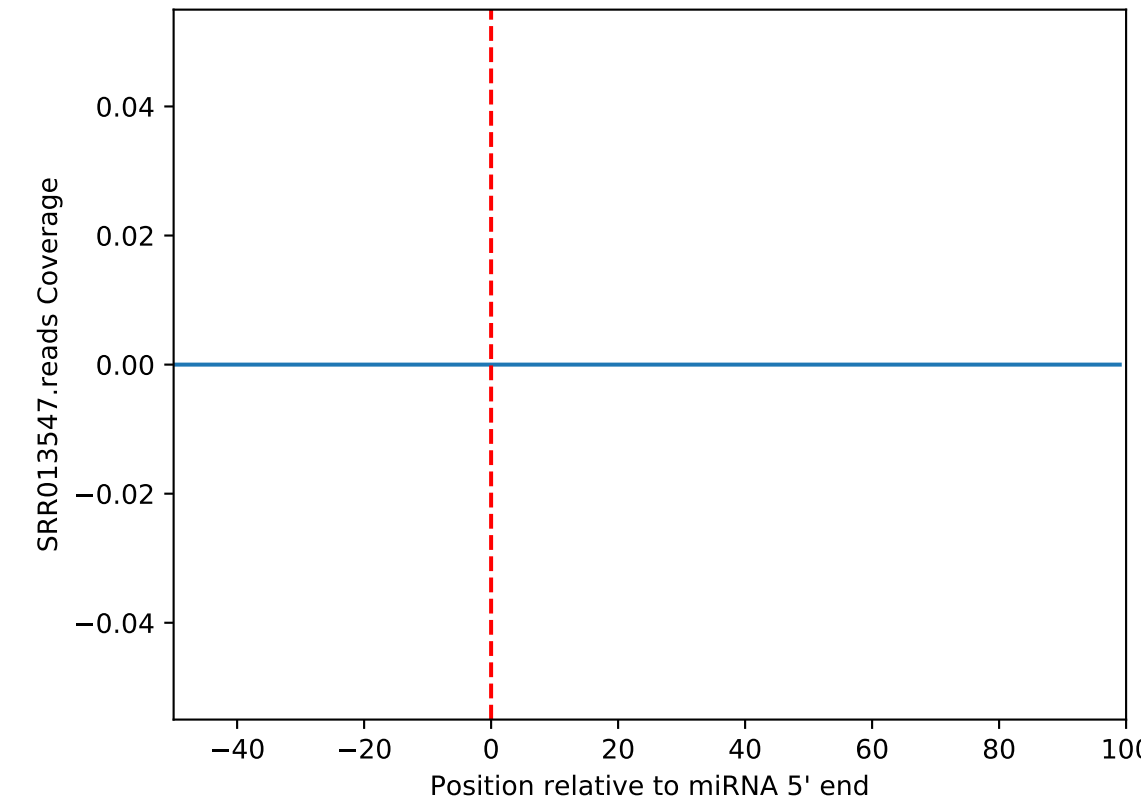

mir-963 (chr2L:5642005(+))

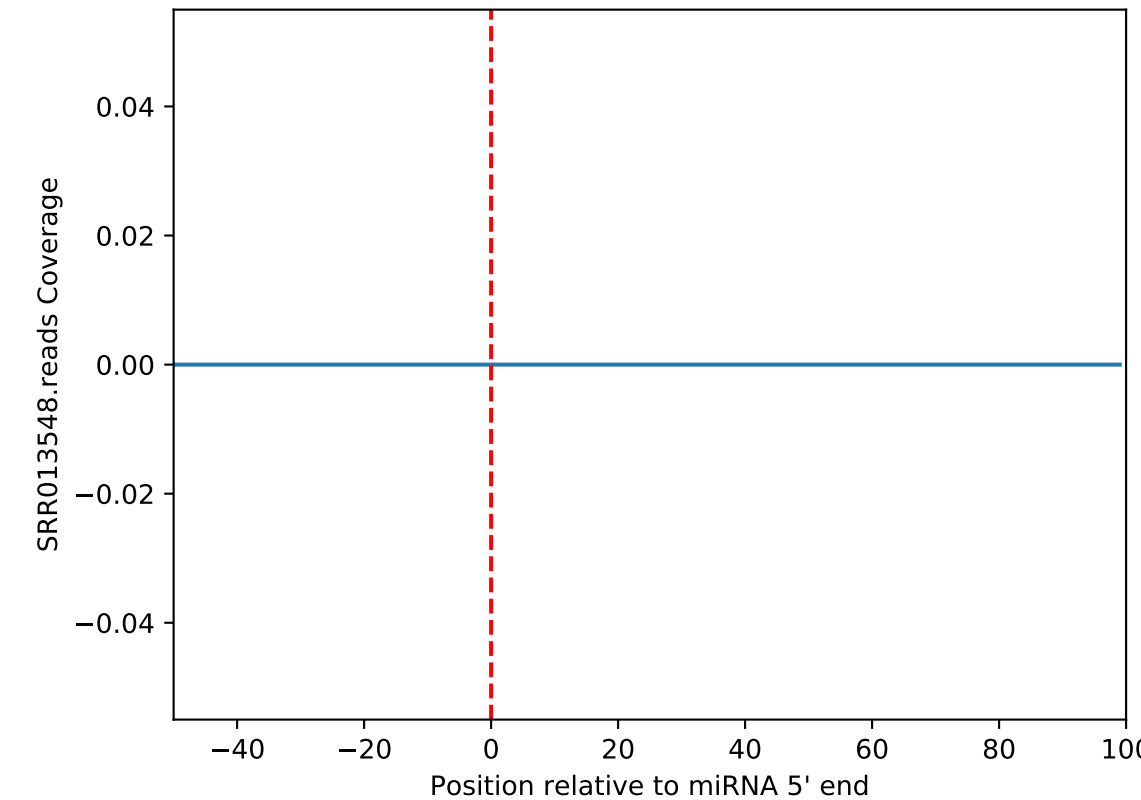

mir-277 (chr3R:10100039(+))

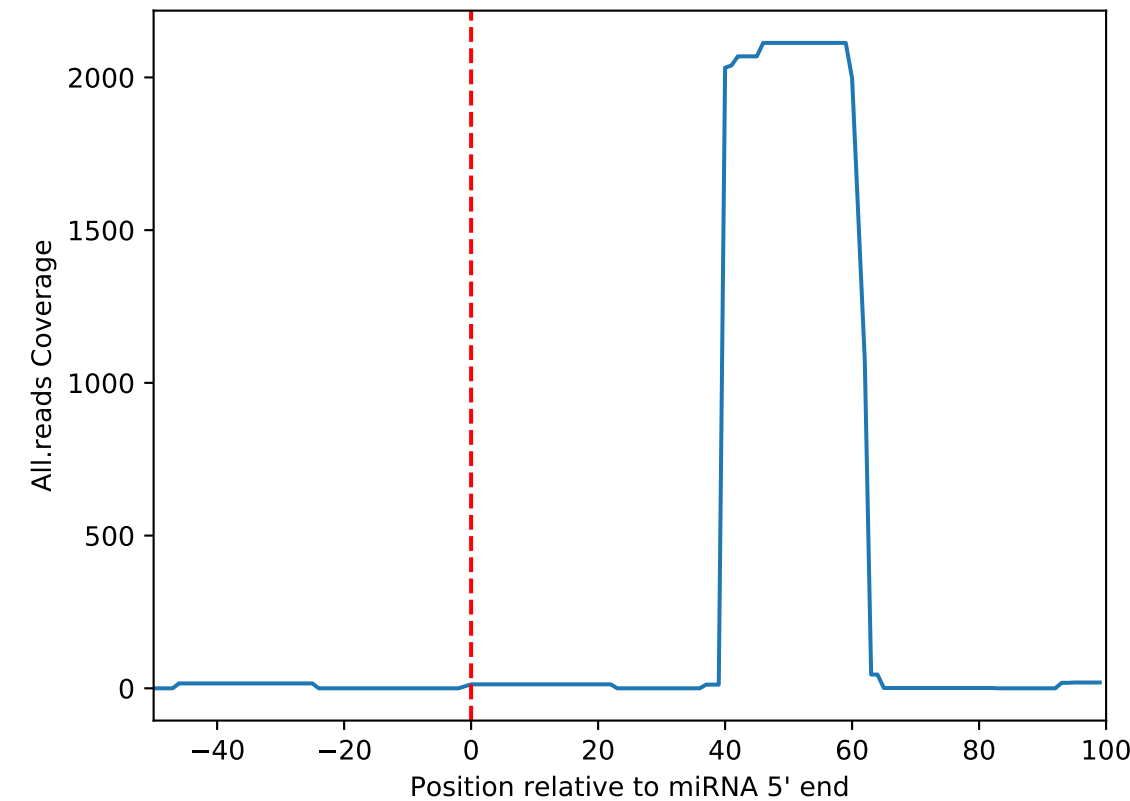

mir-277 (chr3R:10100039(+))

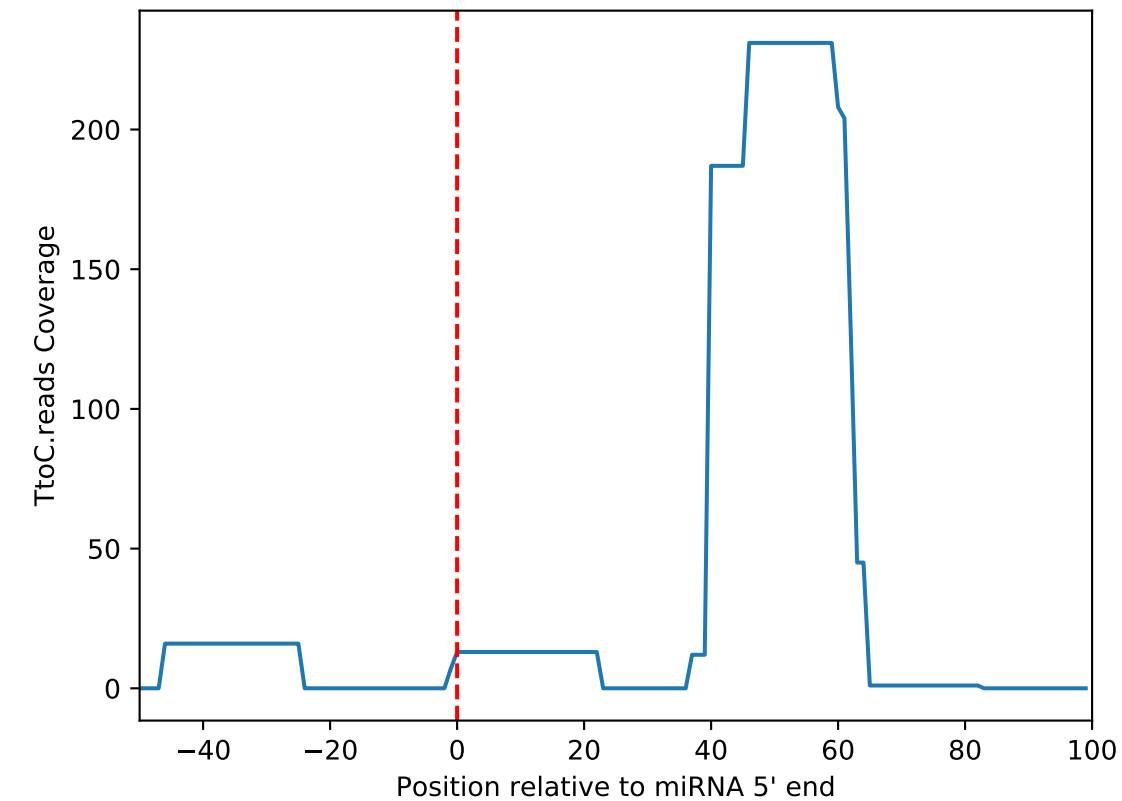

mir-277 (chr3R:10100039(+))

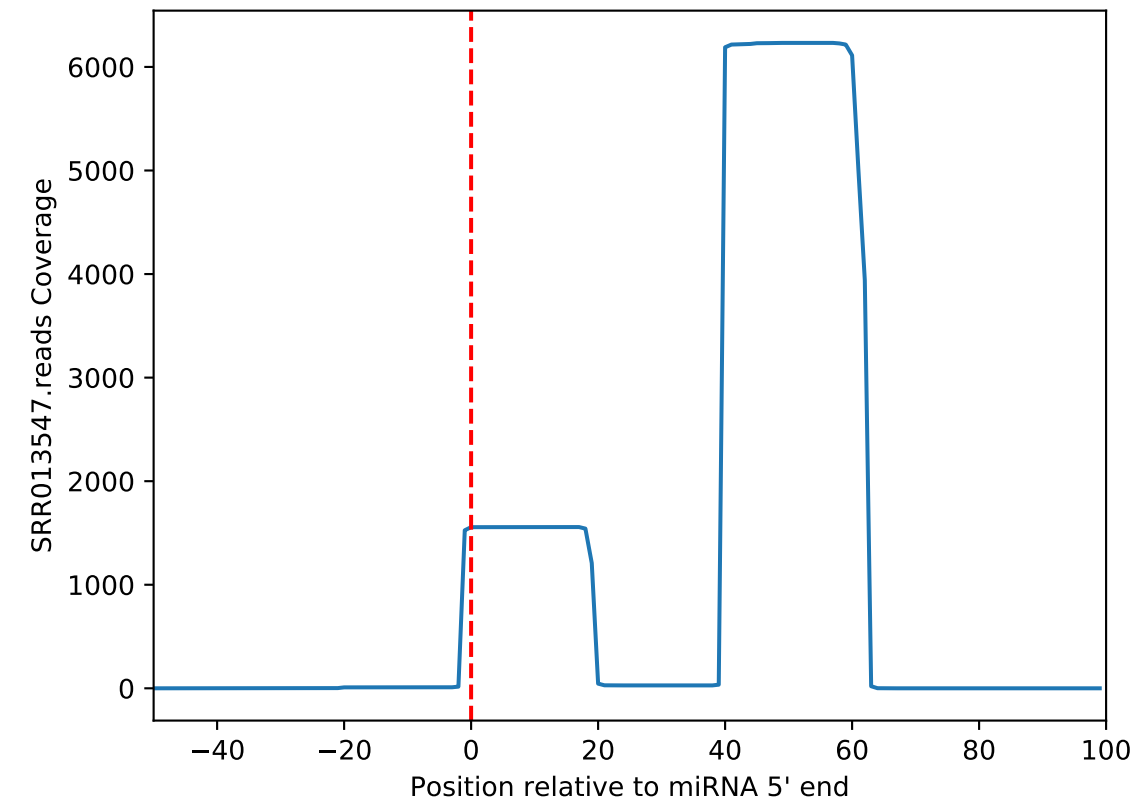

mir-277 (chr3R:10100039(+))

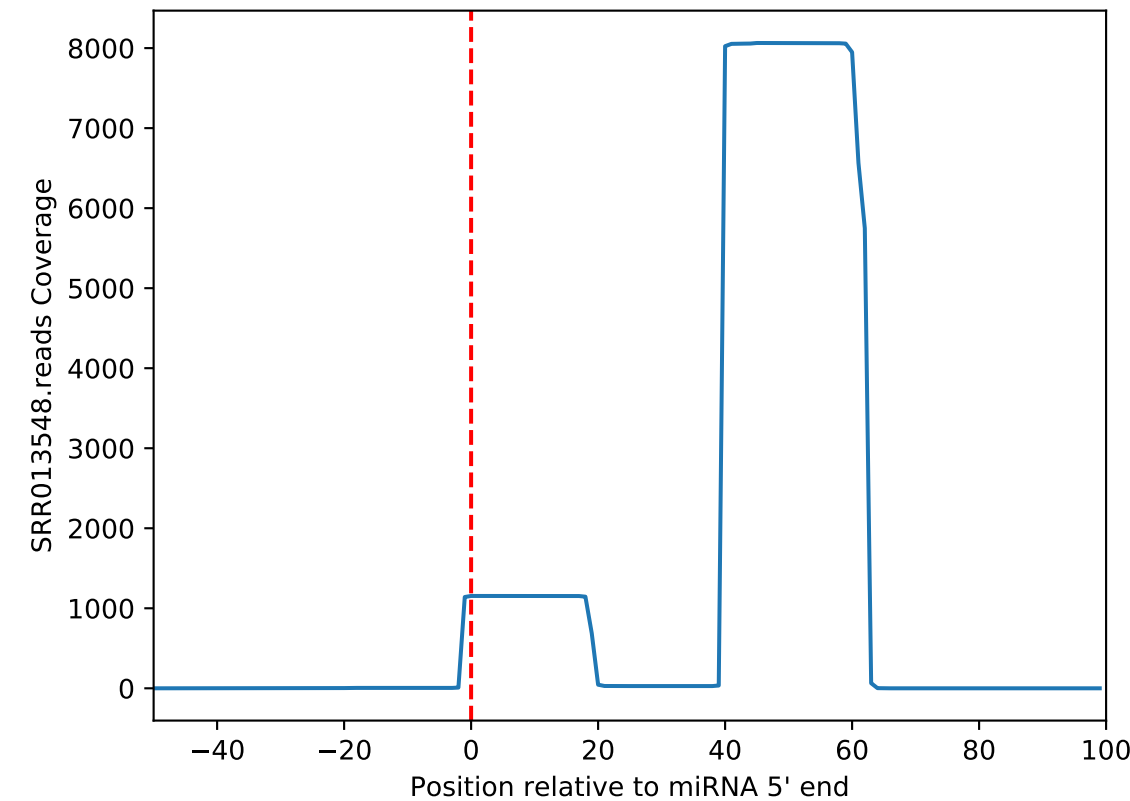

mir-9c (chr2L:16697936(+))

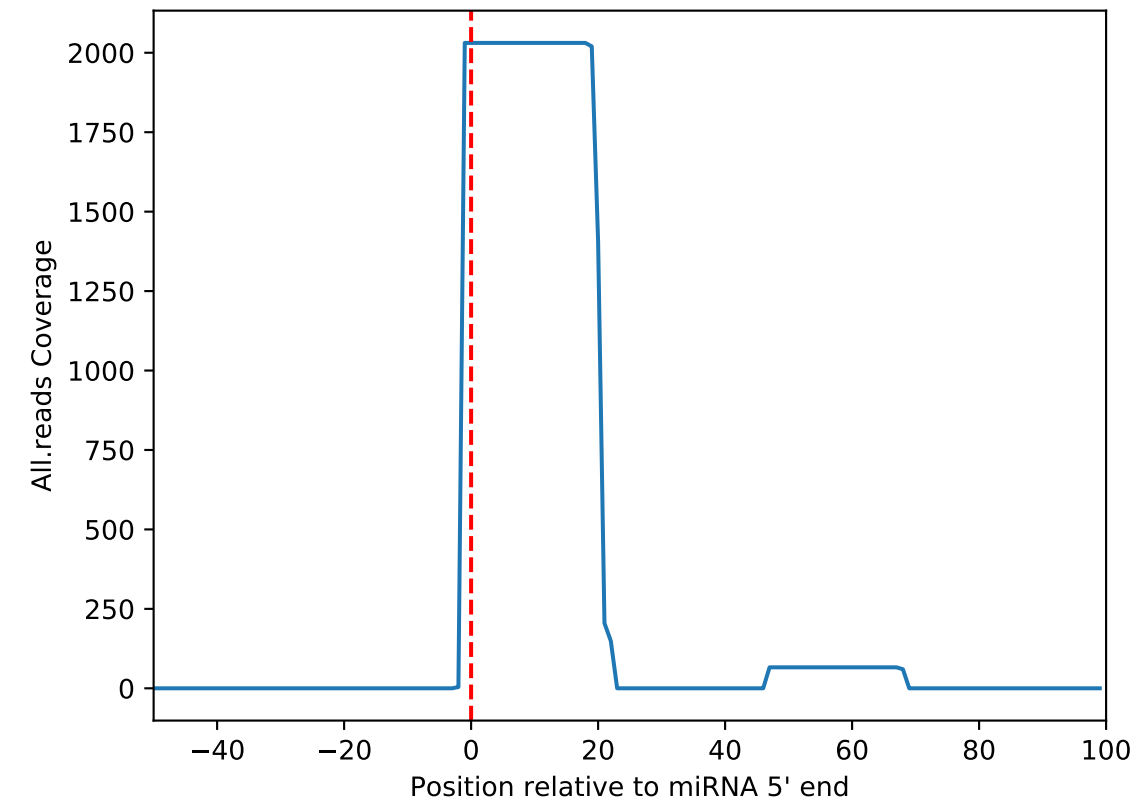

mir-9c (chr2L:16697936(+))

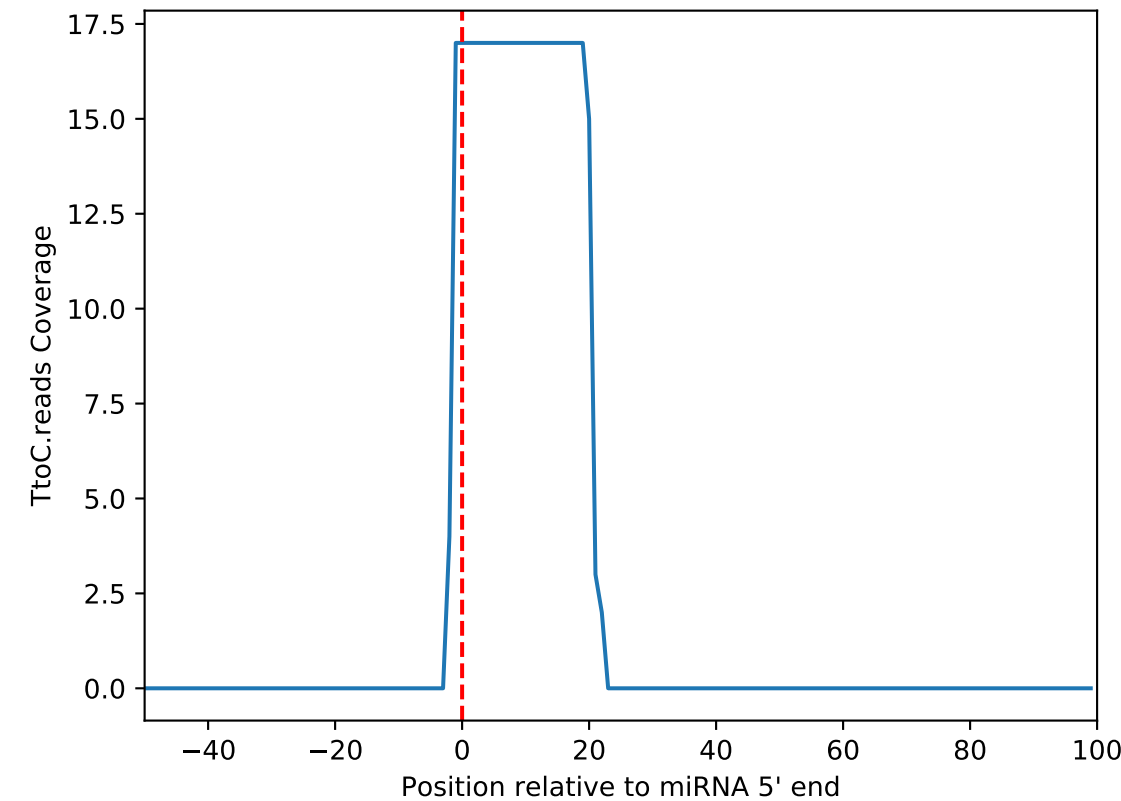

mir-9c (chr2L:16697936(+))

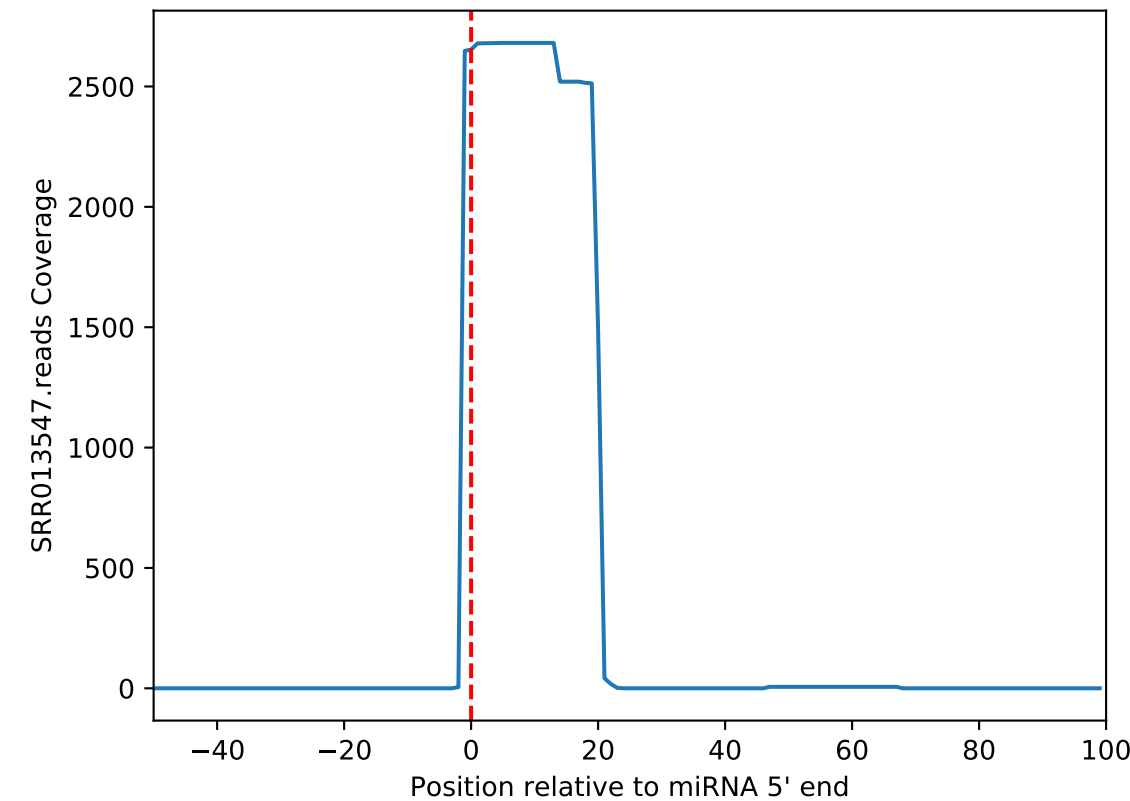

mir-9c (chr2L:16697936(+))

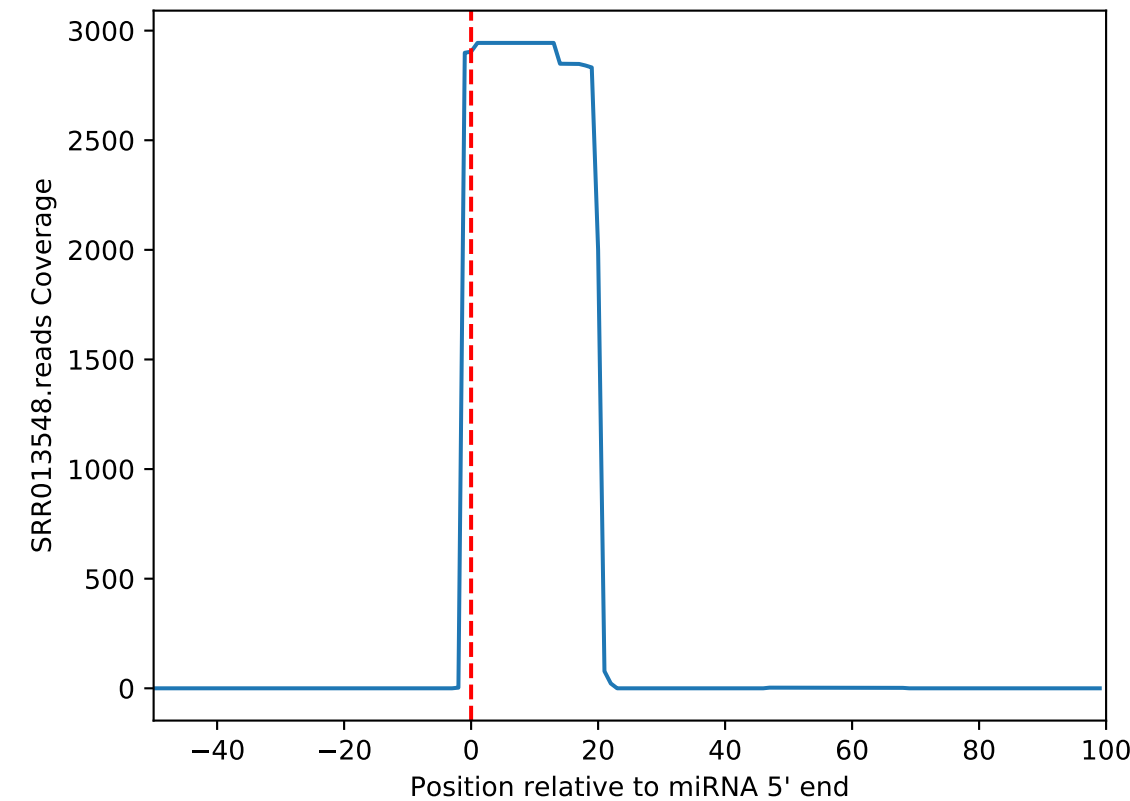

mir-959 (chr2L:5640959(+))

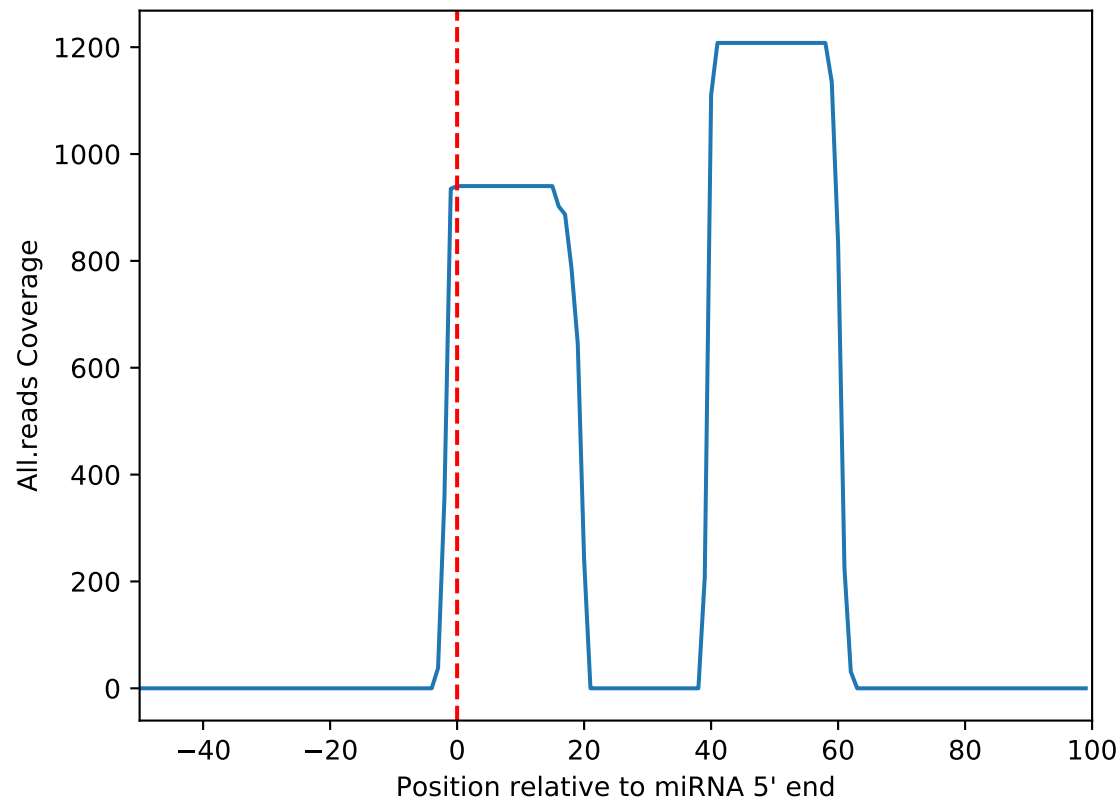

mir-959 (chr2L:5640959(+))

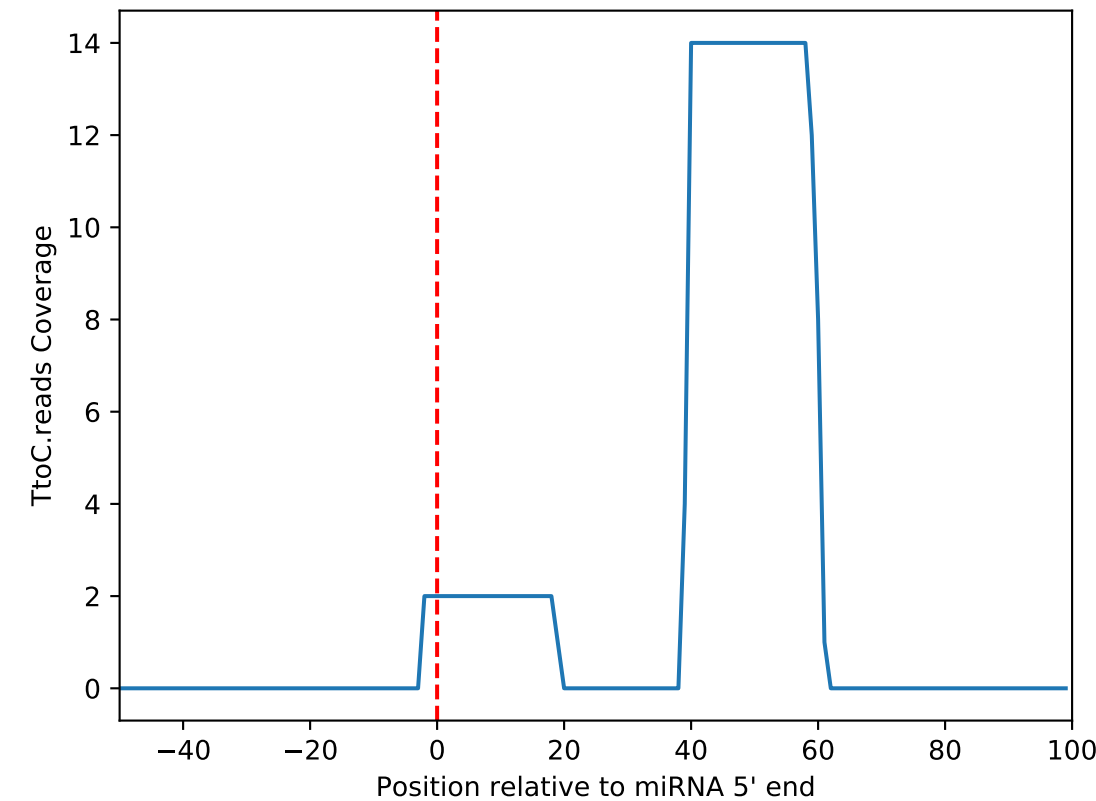

mir-959 (chr2L:5640959(+))

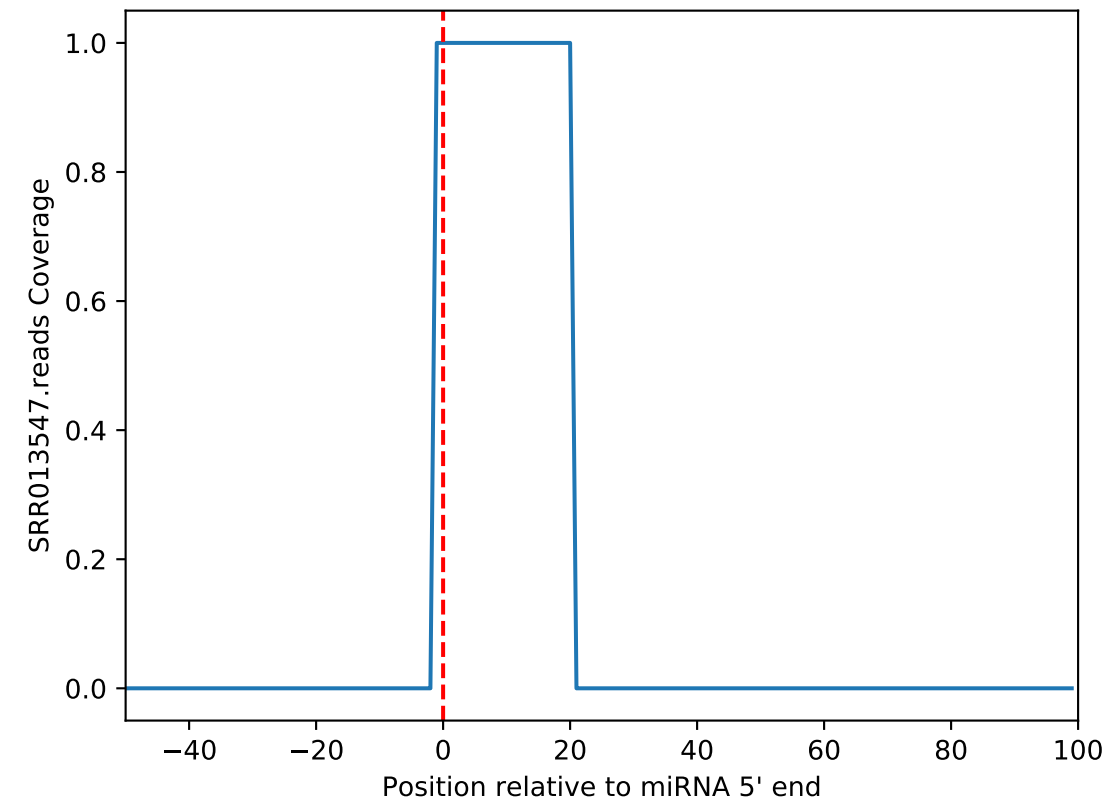

mir-959 (chr2L:5640959(+))

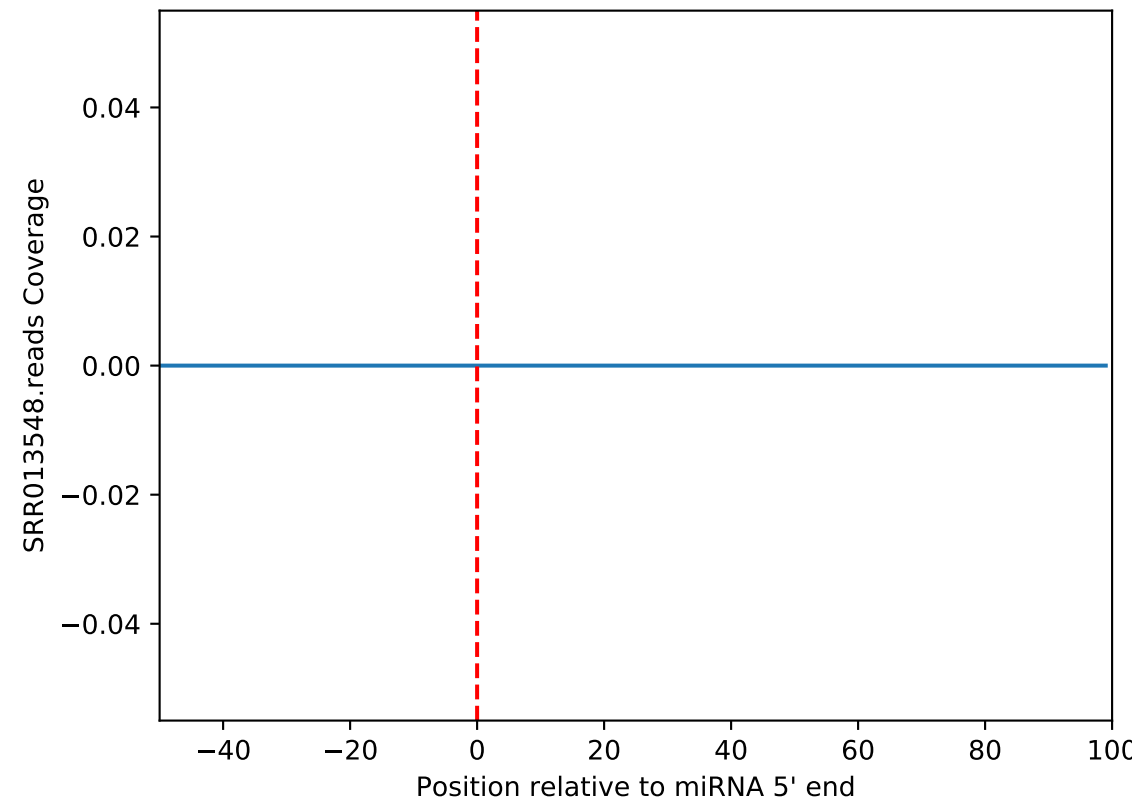

mir-962 (chr2L:5641315(+))

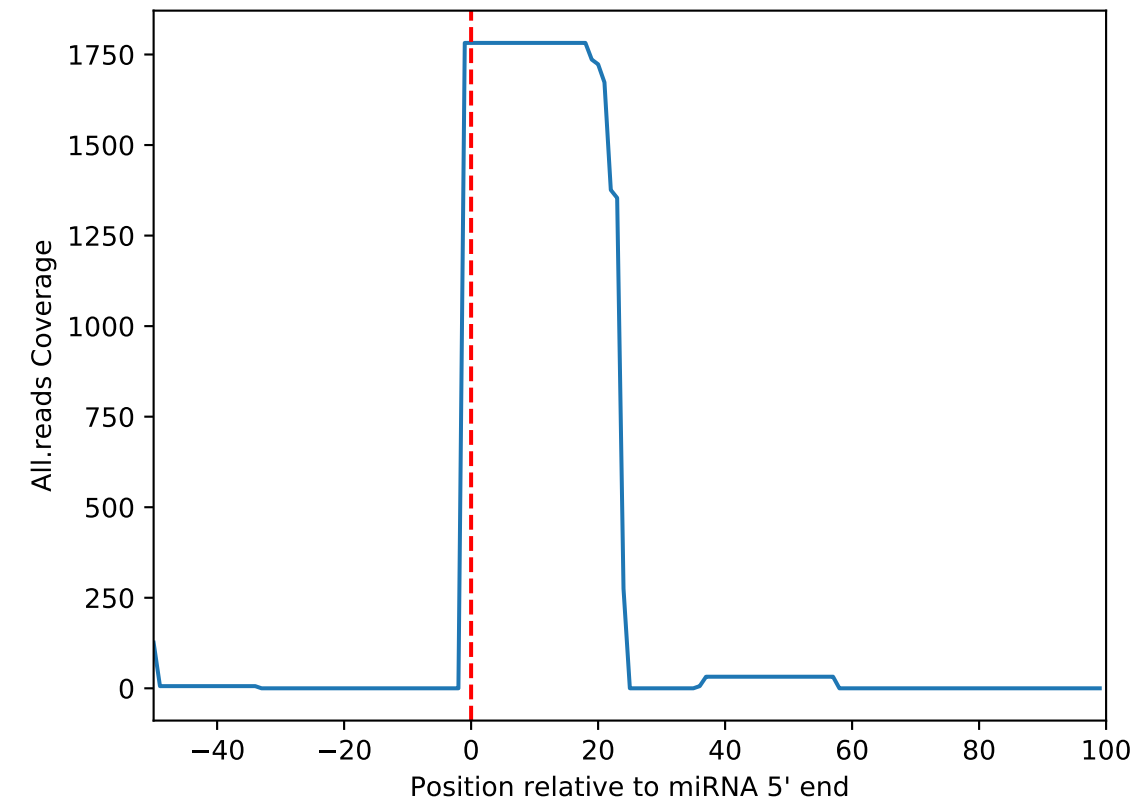

mir-962 (chr2L:5641315(+))

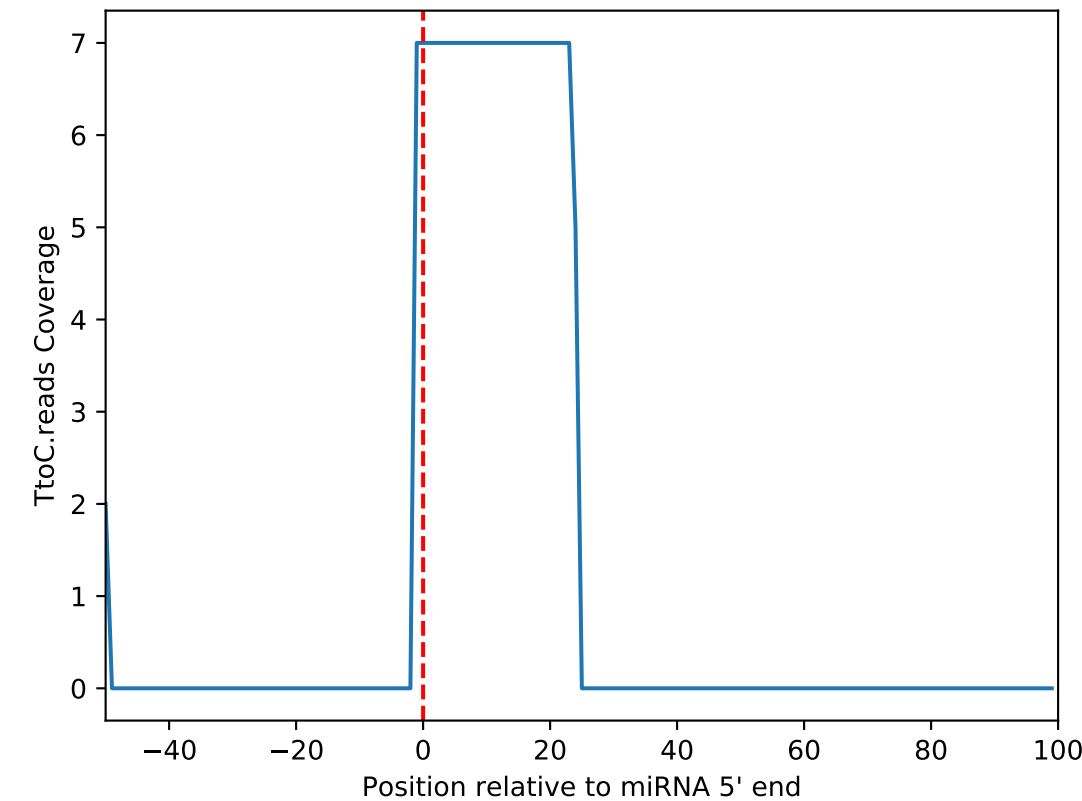

mir-962 (chr2L:5641315(+))

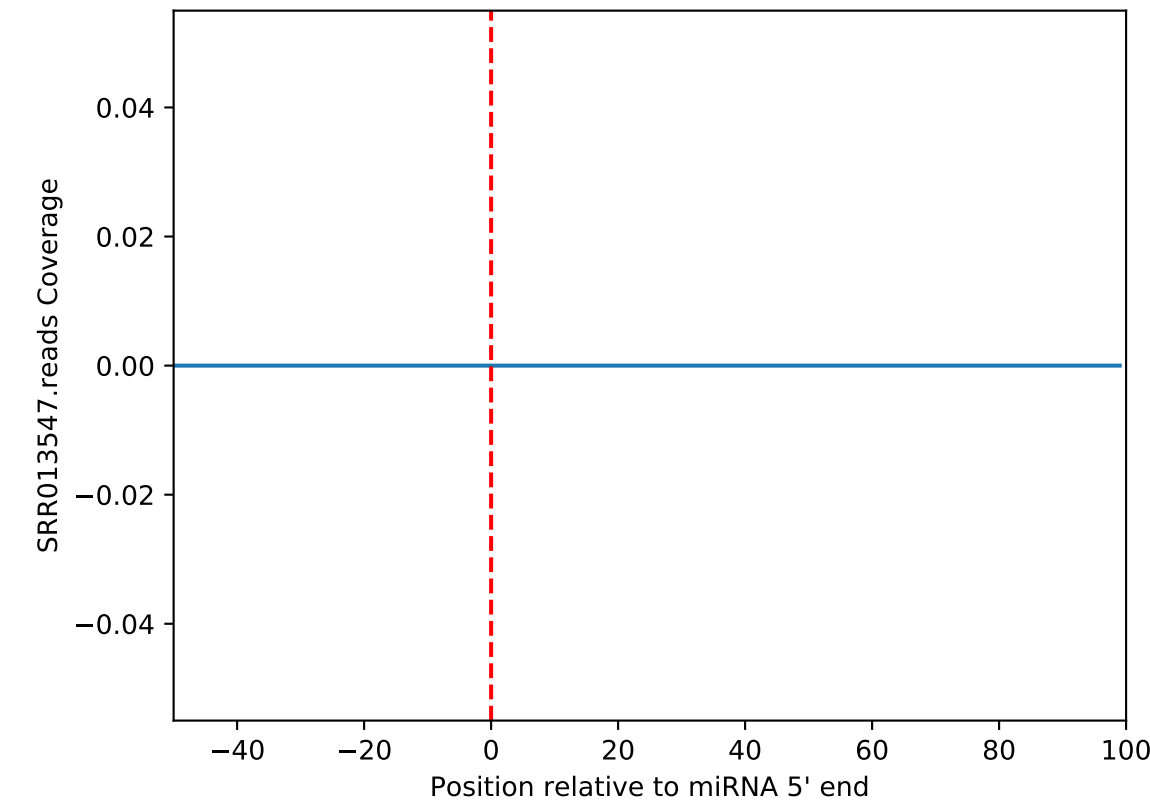

mir-962 (chr2L:5641315(+))

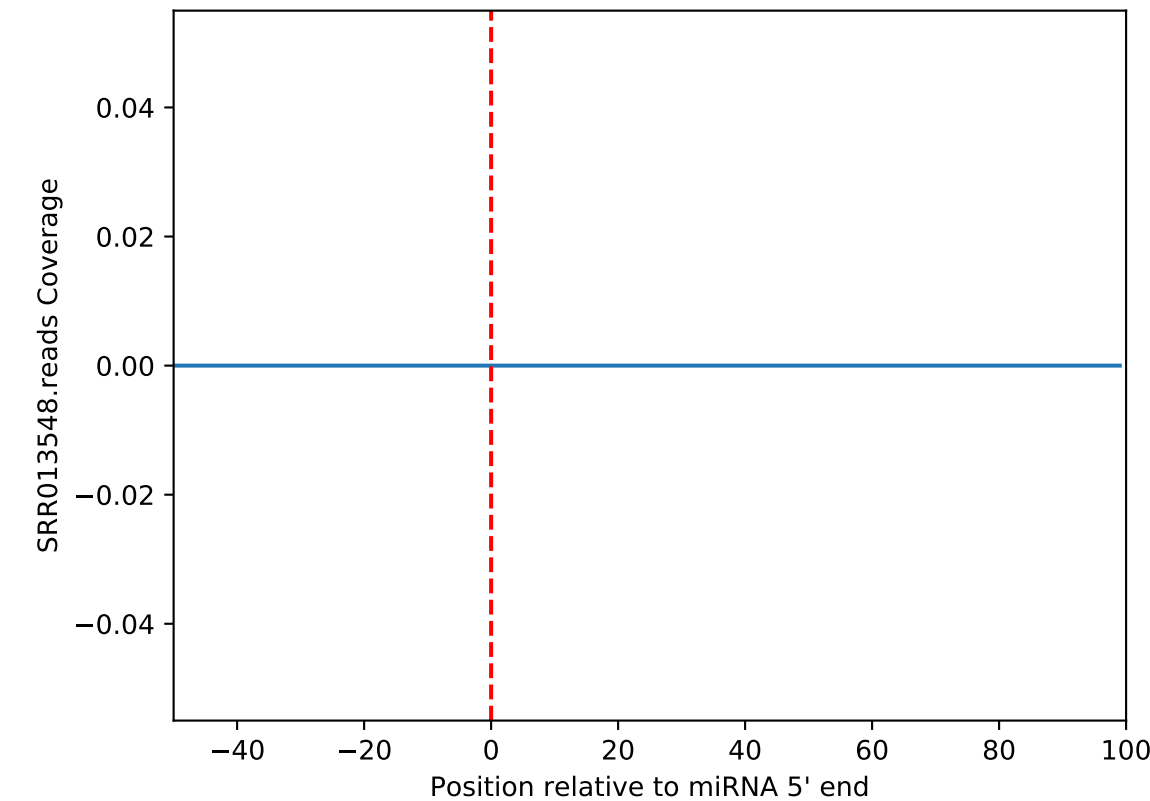

mir-312 (chr2R:20584117(-))

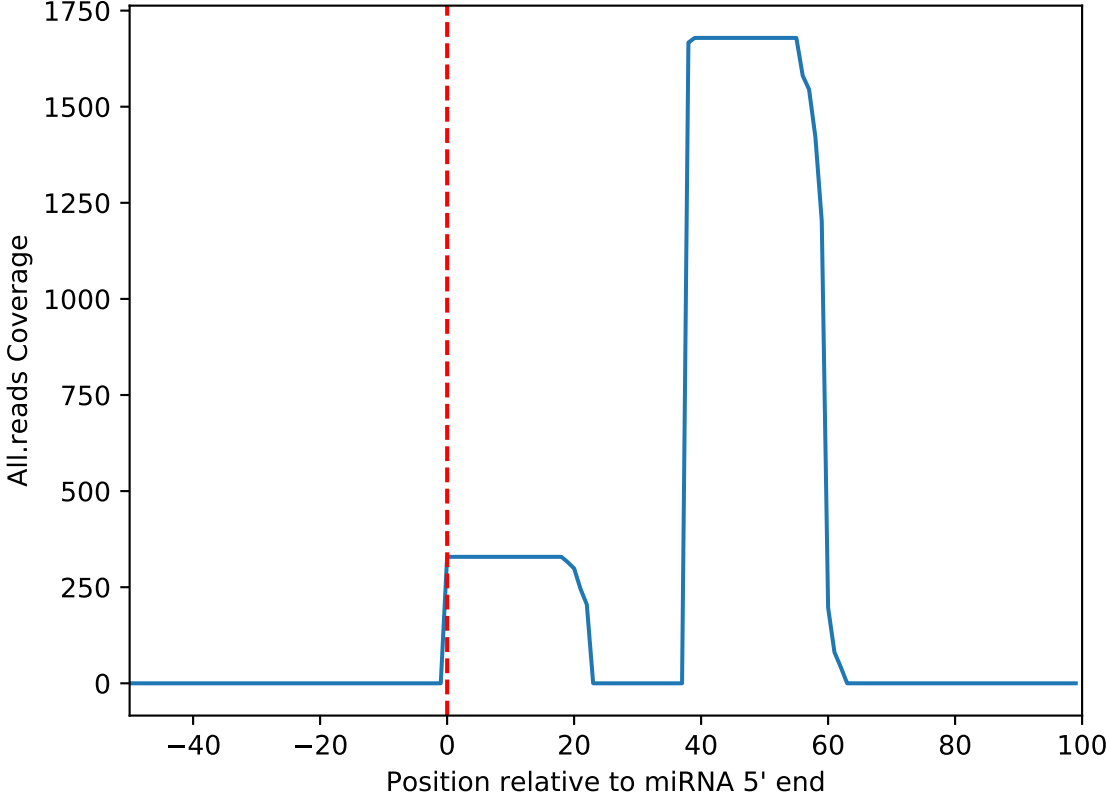

mir-312 (chr2R:20584117(-))

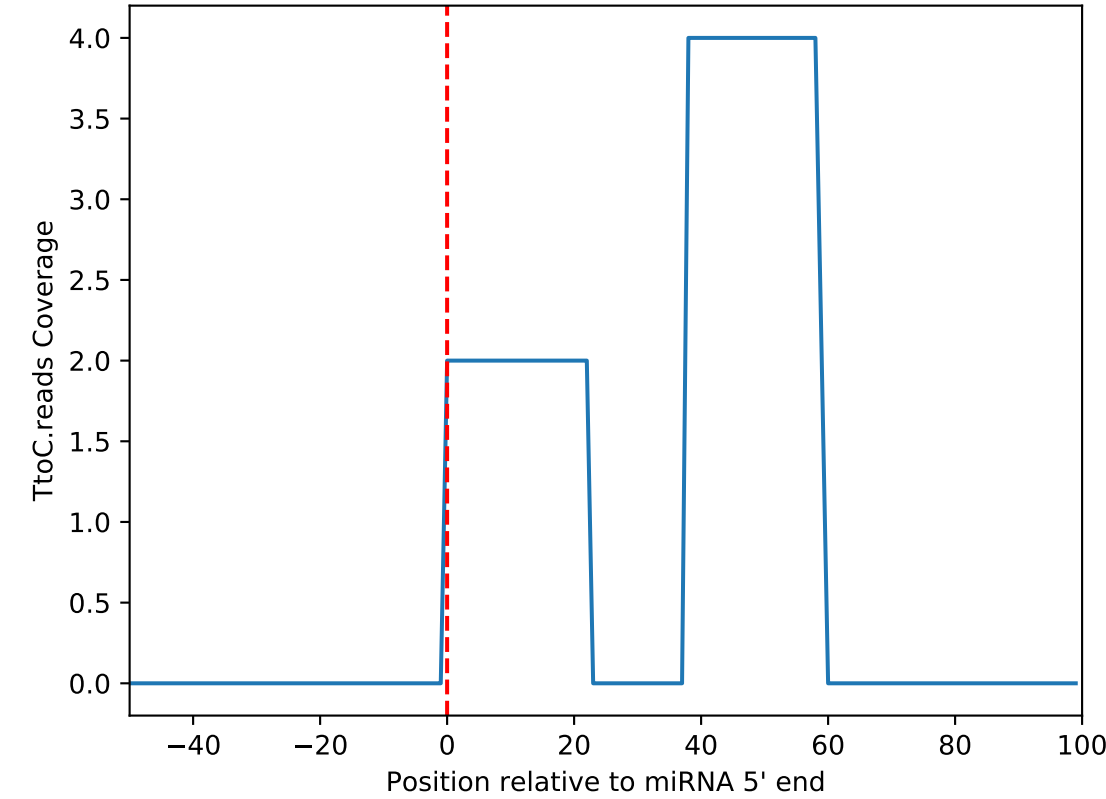

mir-312 (chr2R:20584117(-))

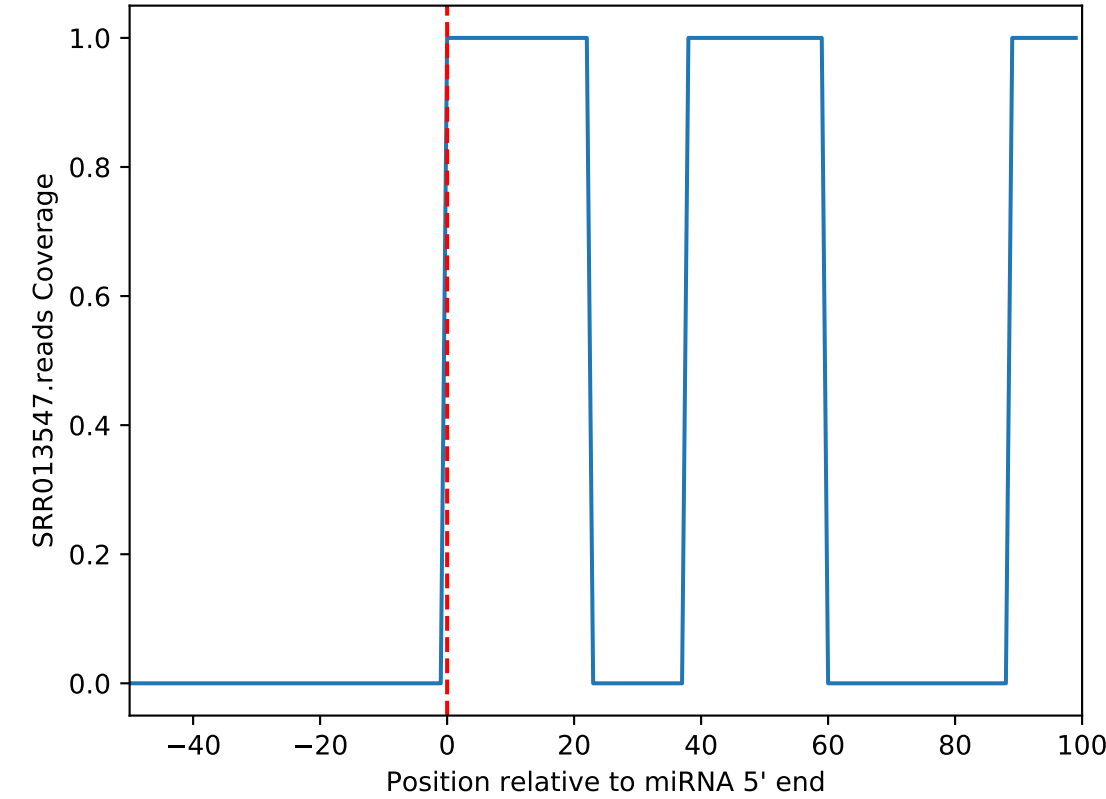

mir-312 (chr2R:20584117(-))

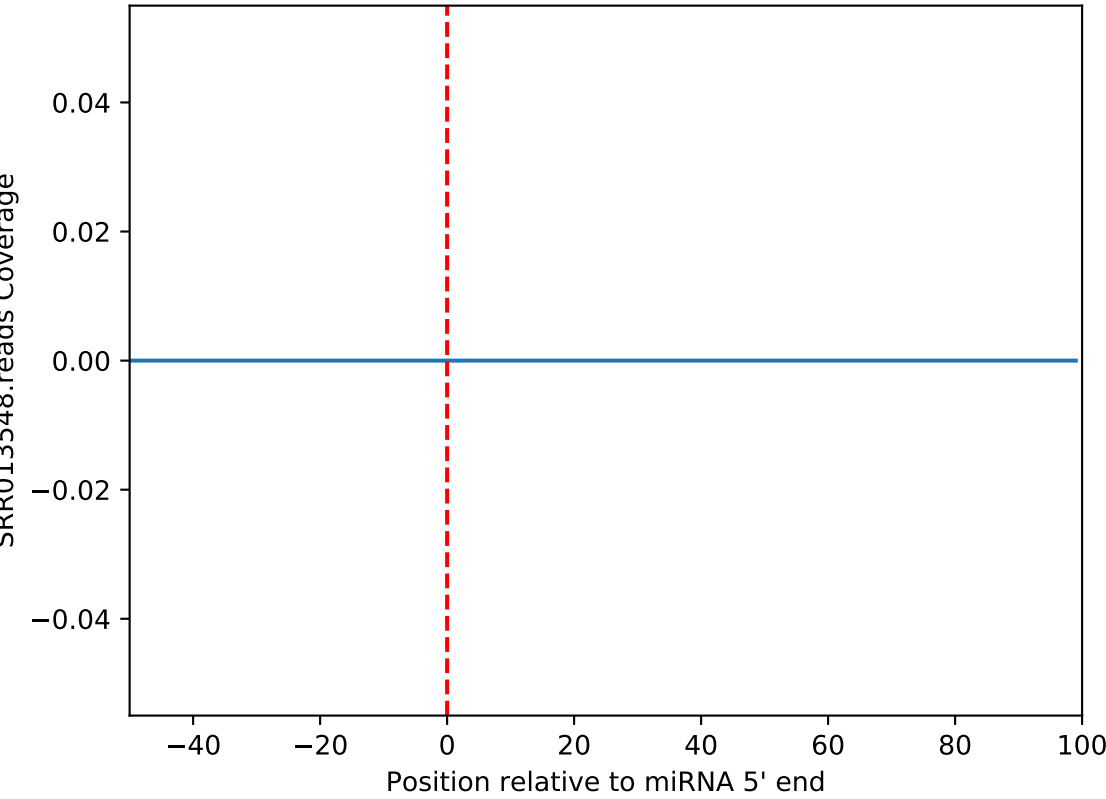

mir-984 (chrX:4368720(-))

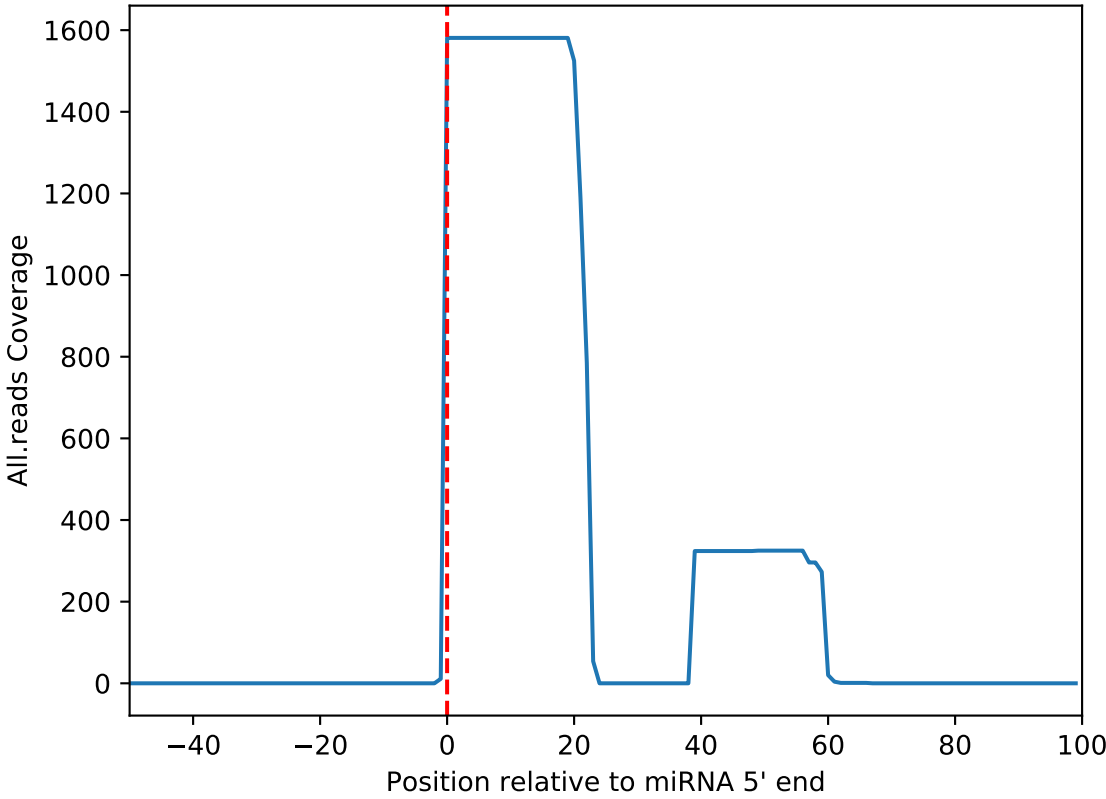

mir-984 (chrX:4368720(-))

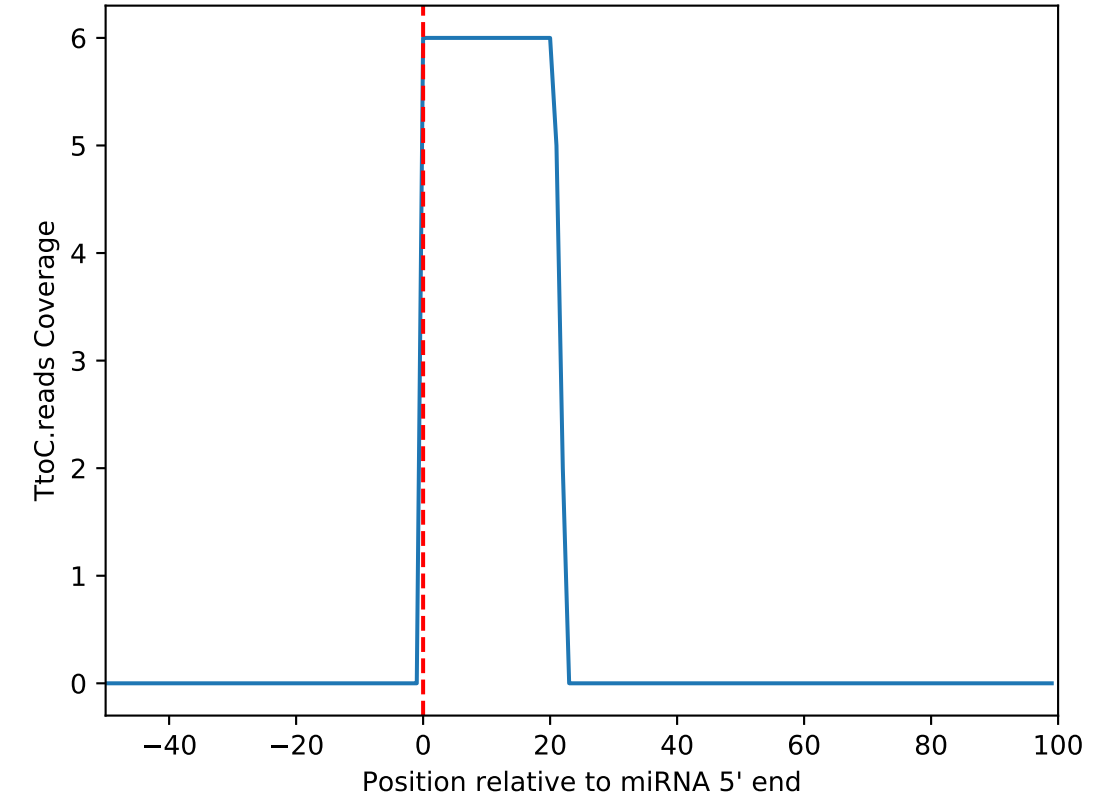

mir-984 (chrX:4368720(-))

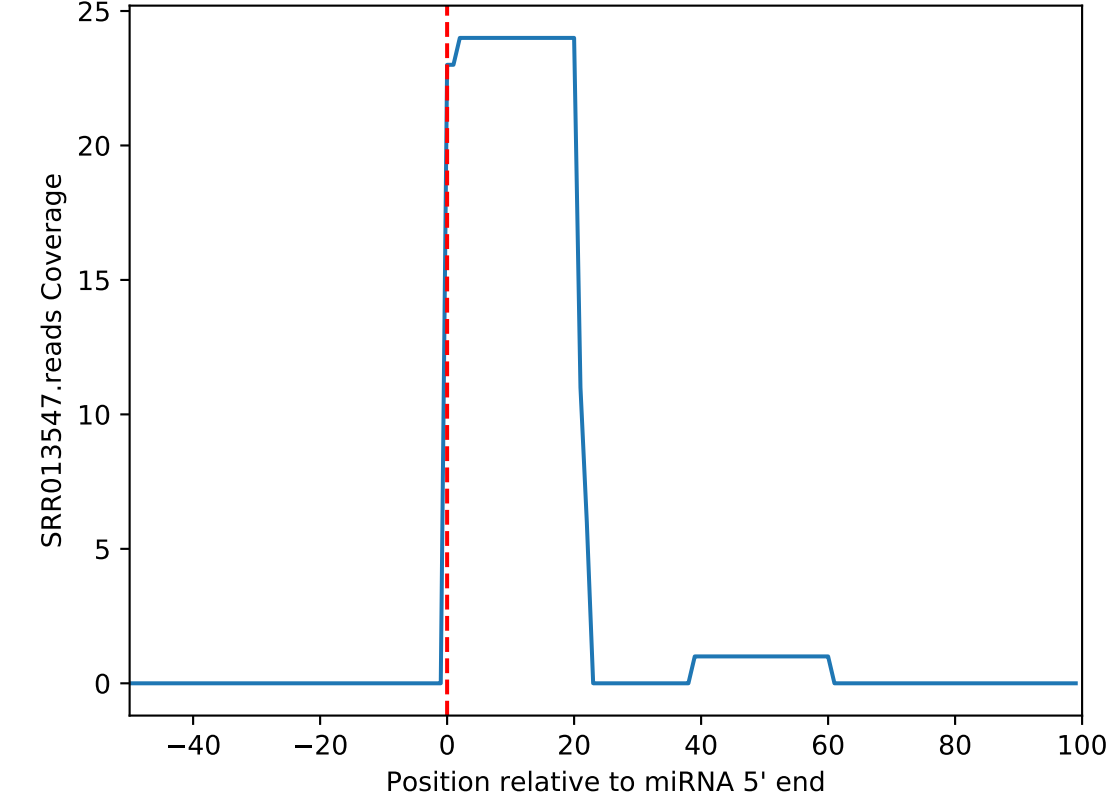

mir-984 (chrX:4368720(-))

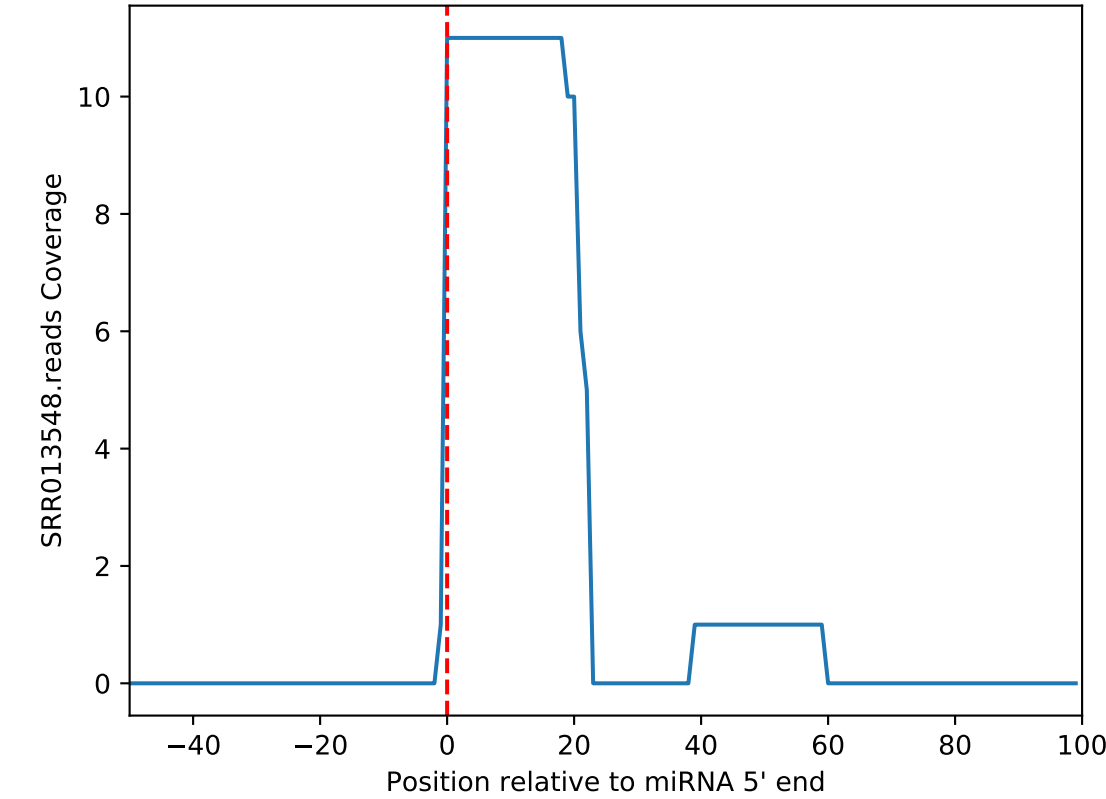



mir-7 (chr2R:20606081(+))

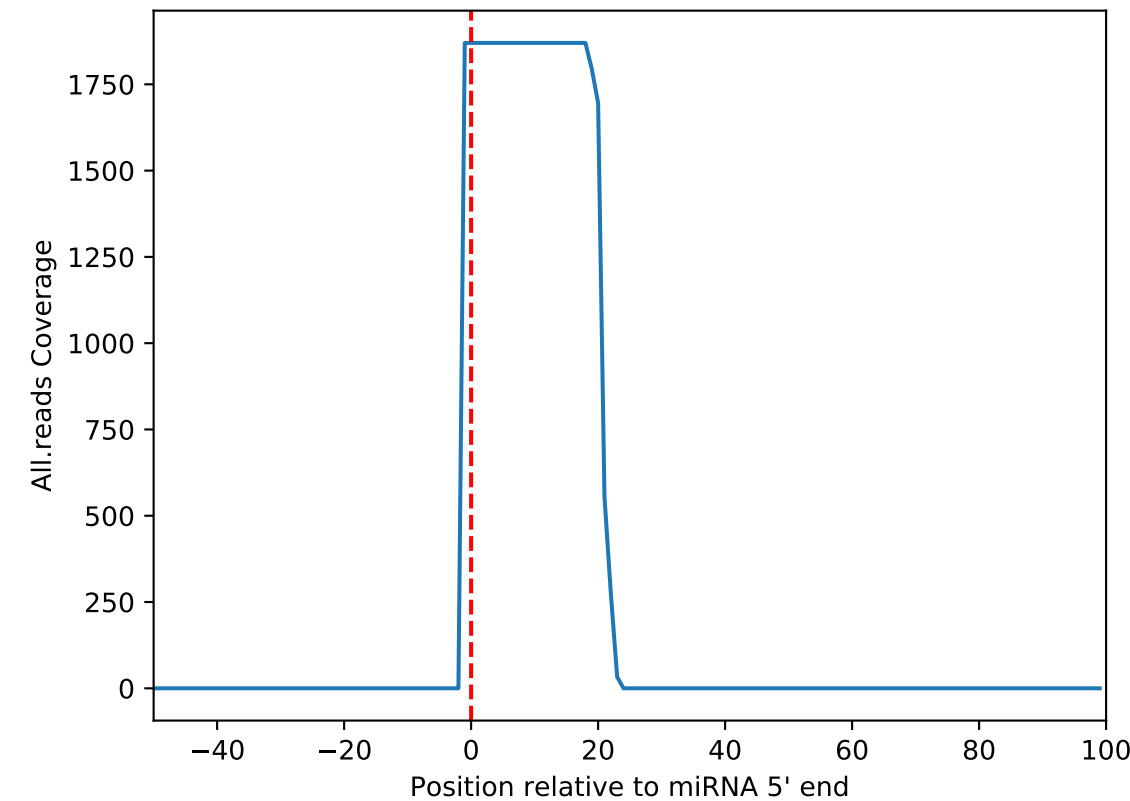

mir-7 (chr2R:20606081(+))

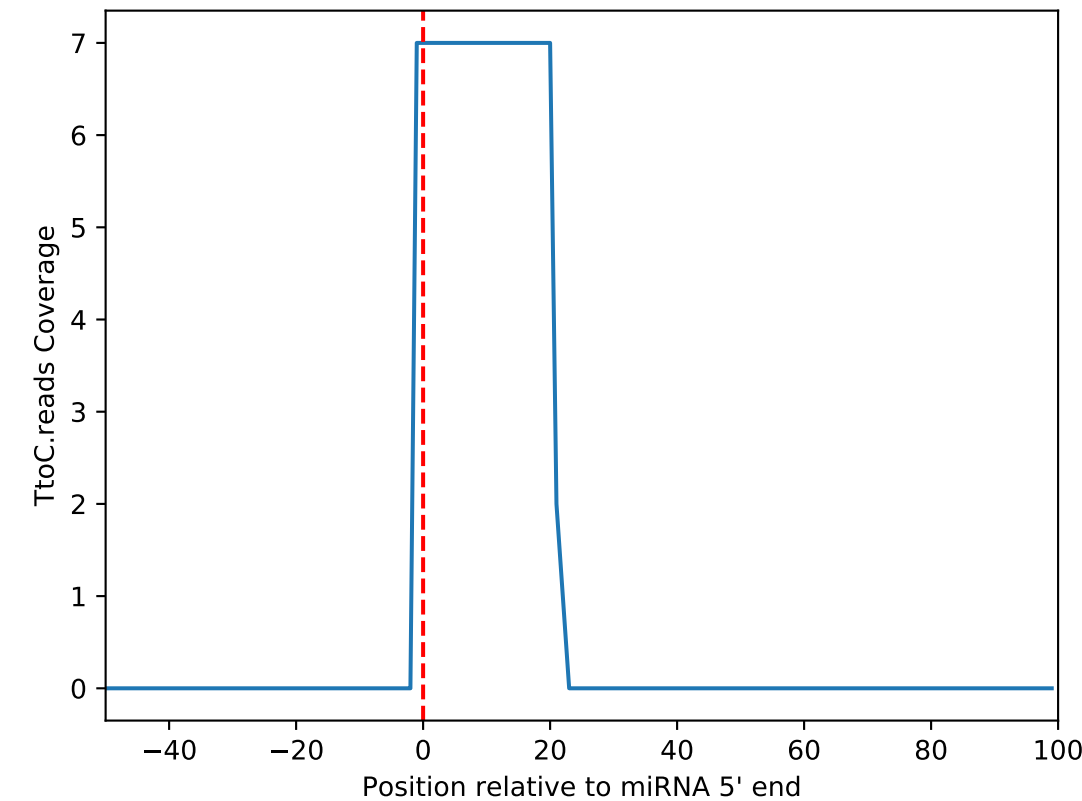

mir-7 (chr2R:20606081(+))

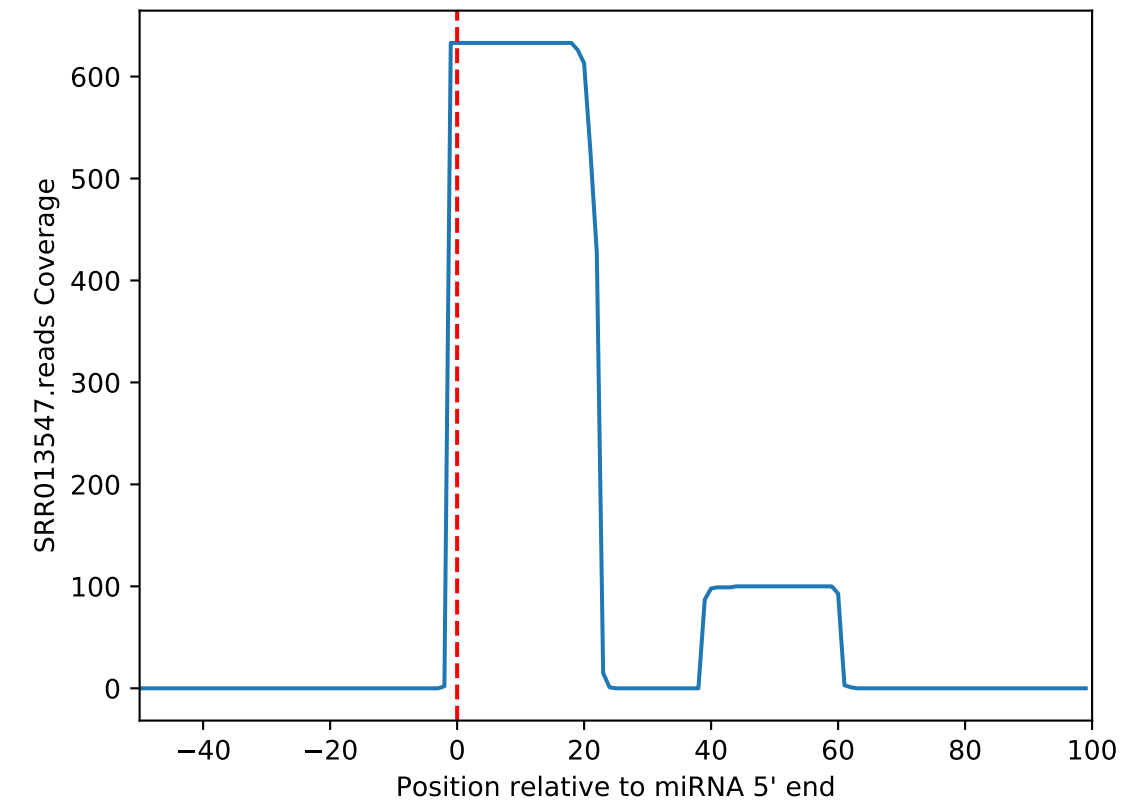

mir-7 (chr2R:20606081(+))

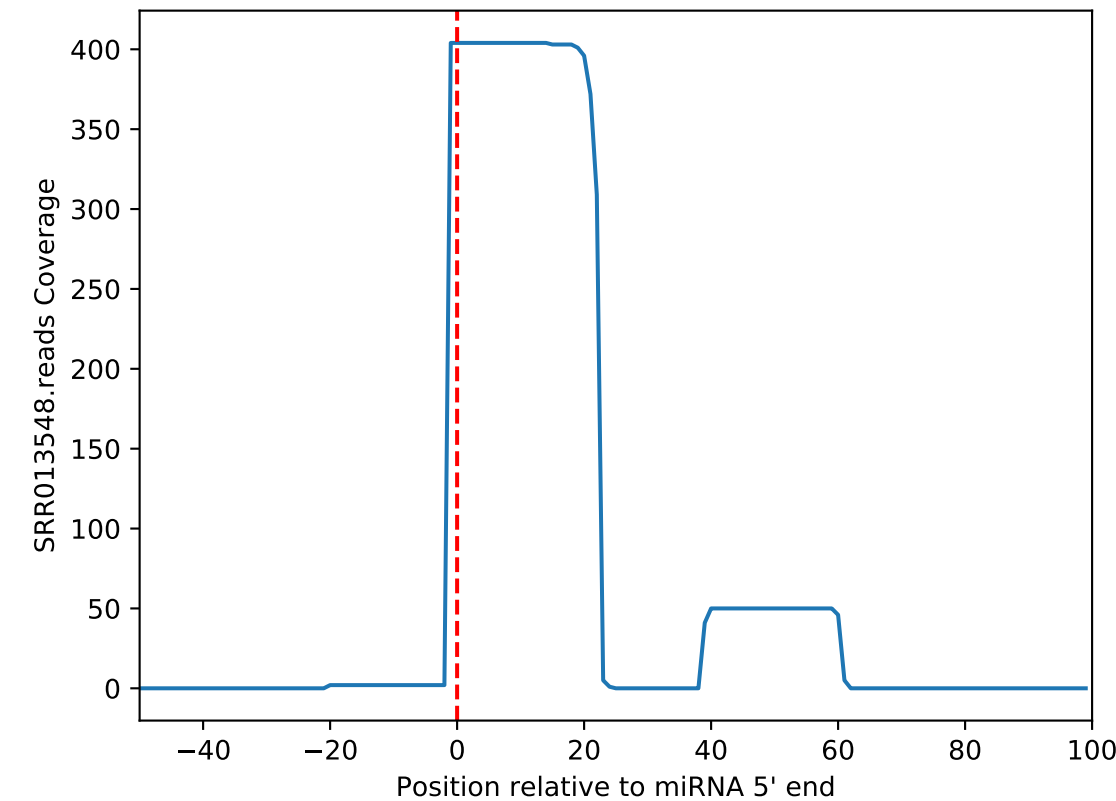

mir-10404 (chrX:23538276(-))

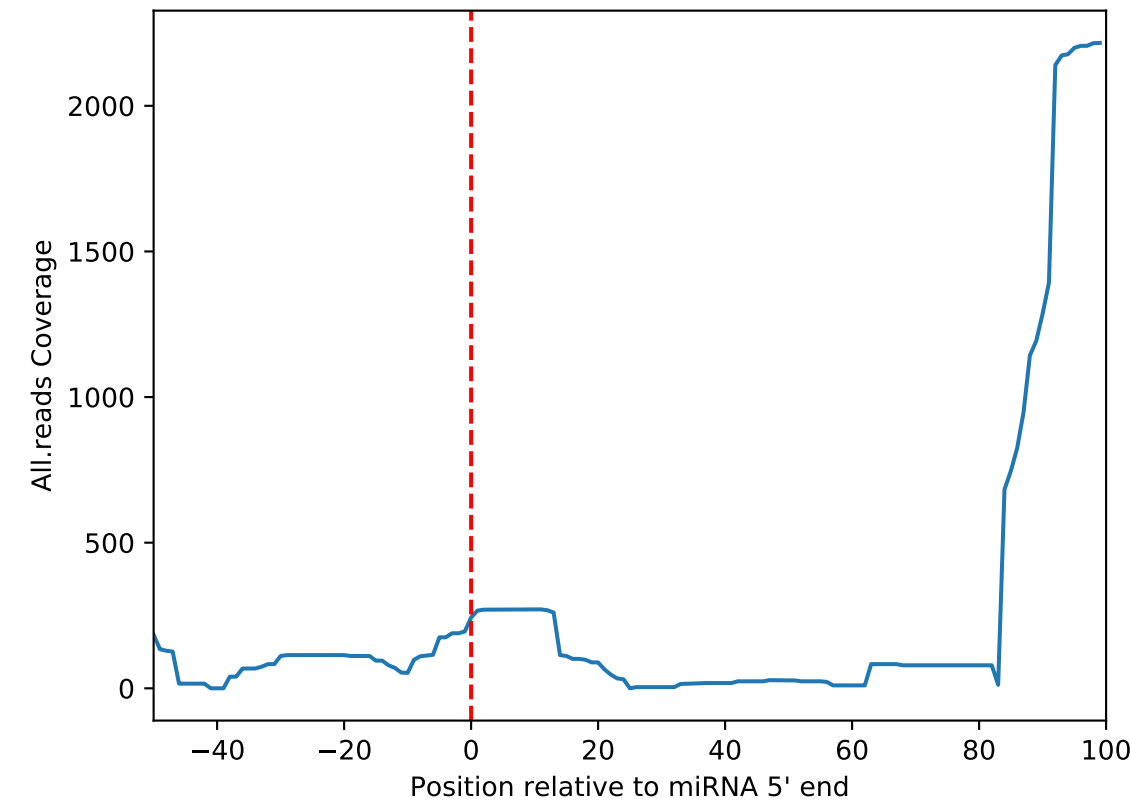

mir-10404 (chrX:23538276(-))

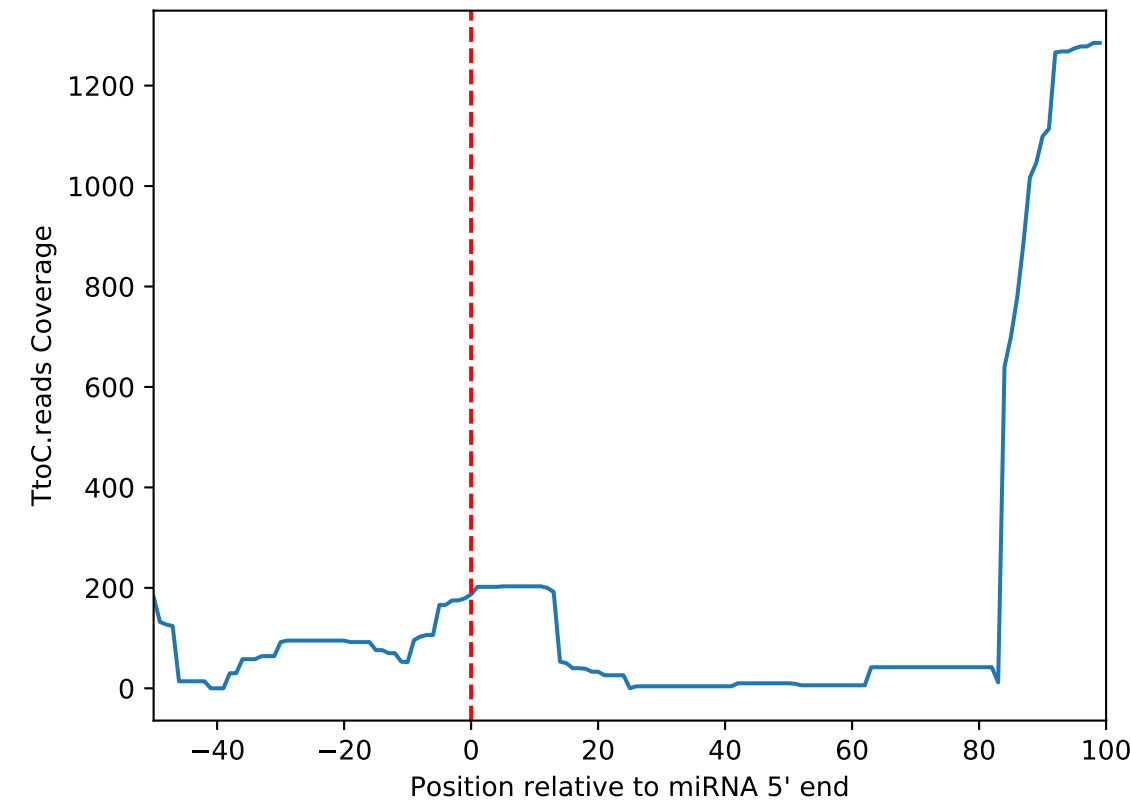

mir-10404 (chrX:23538276(-))

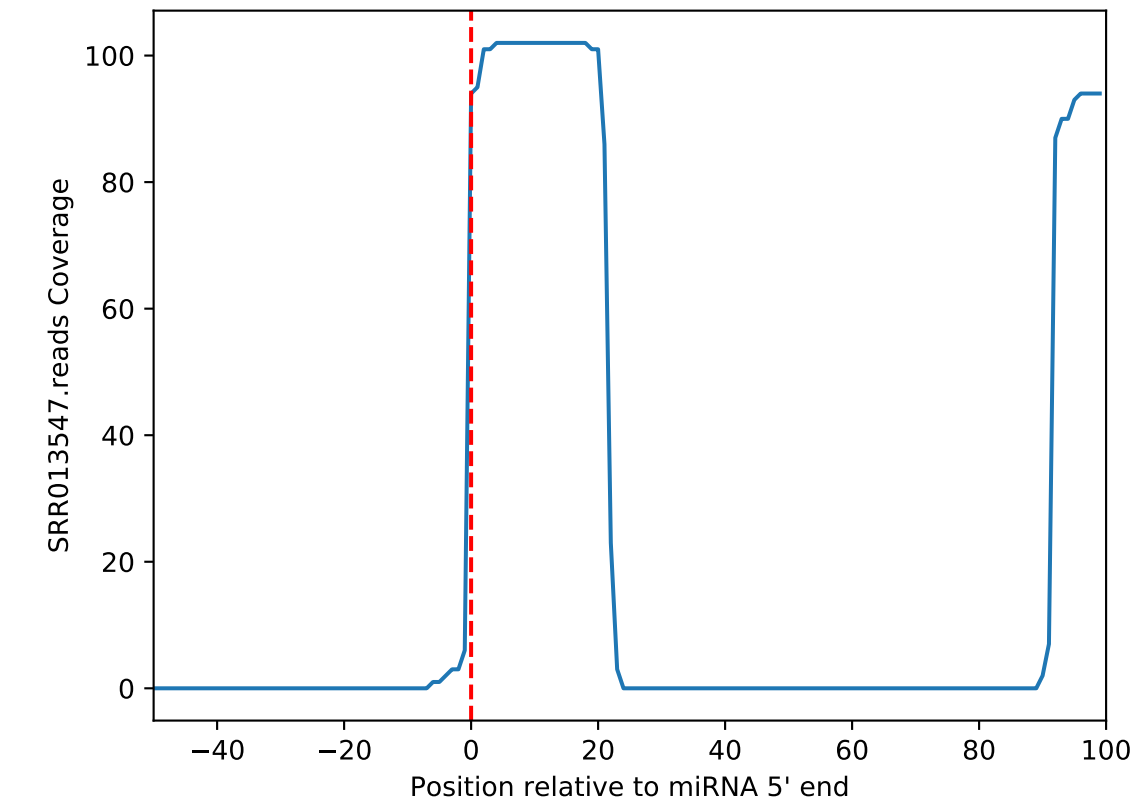

mir-10404 (chrX:23538276(-))

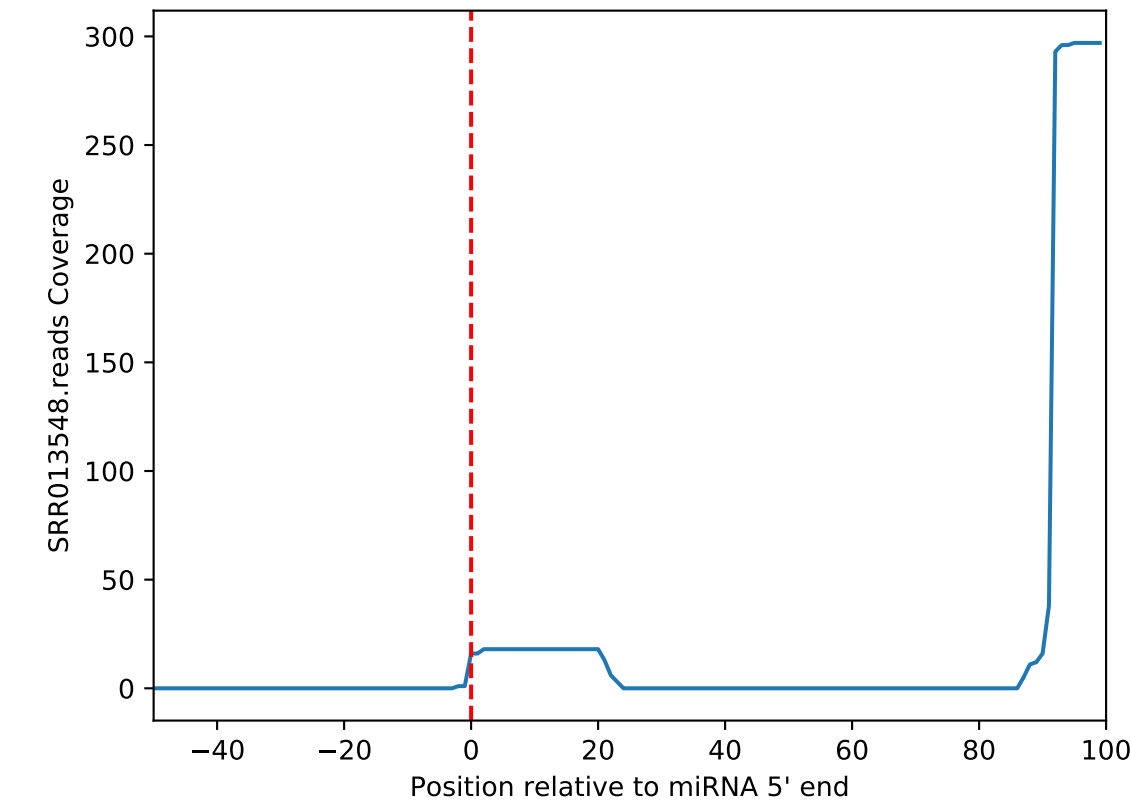

mir-316 (chr3L:21668787(-))

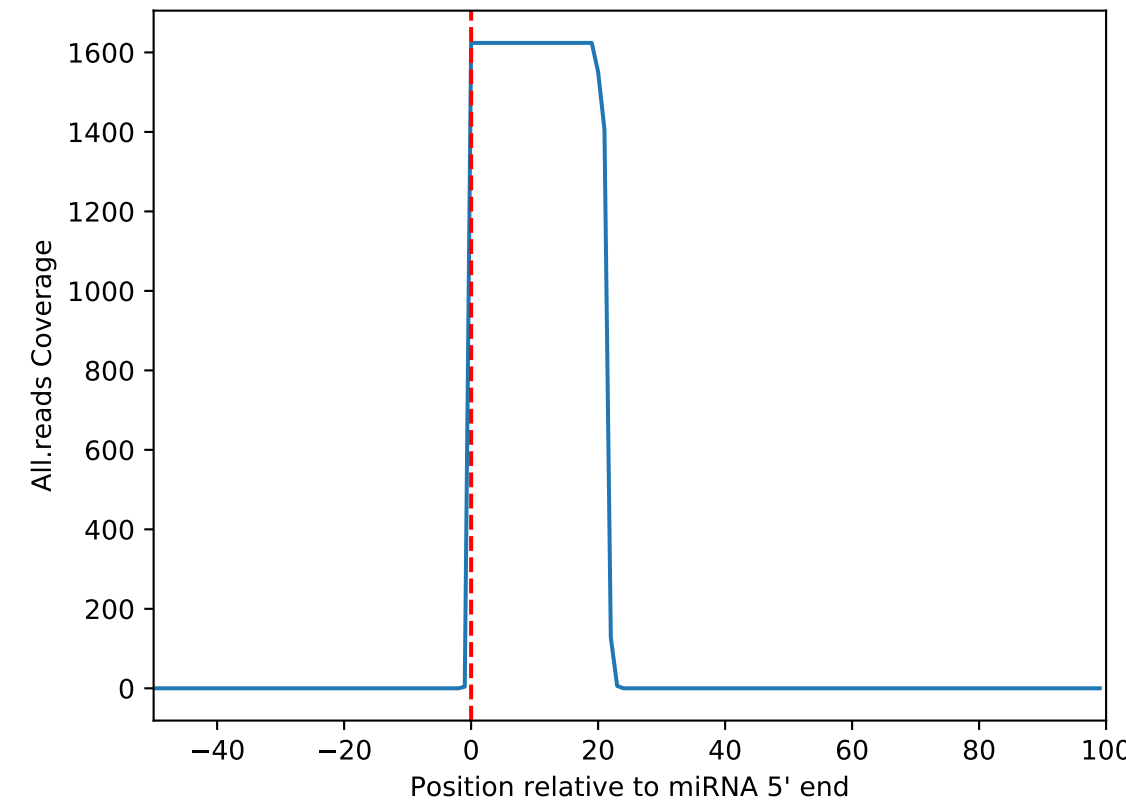

mir-316 (chr3L:21668787(-))

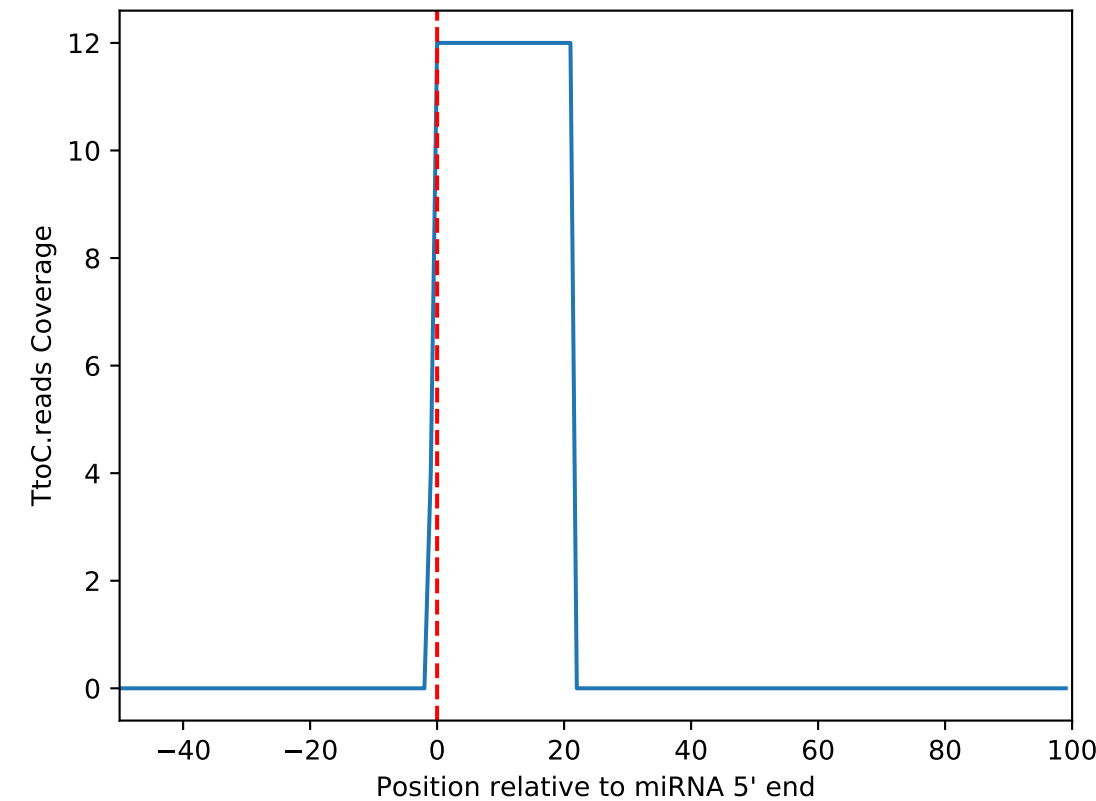

mir-316 (chr3L:21668787(-))

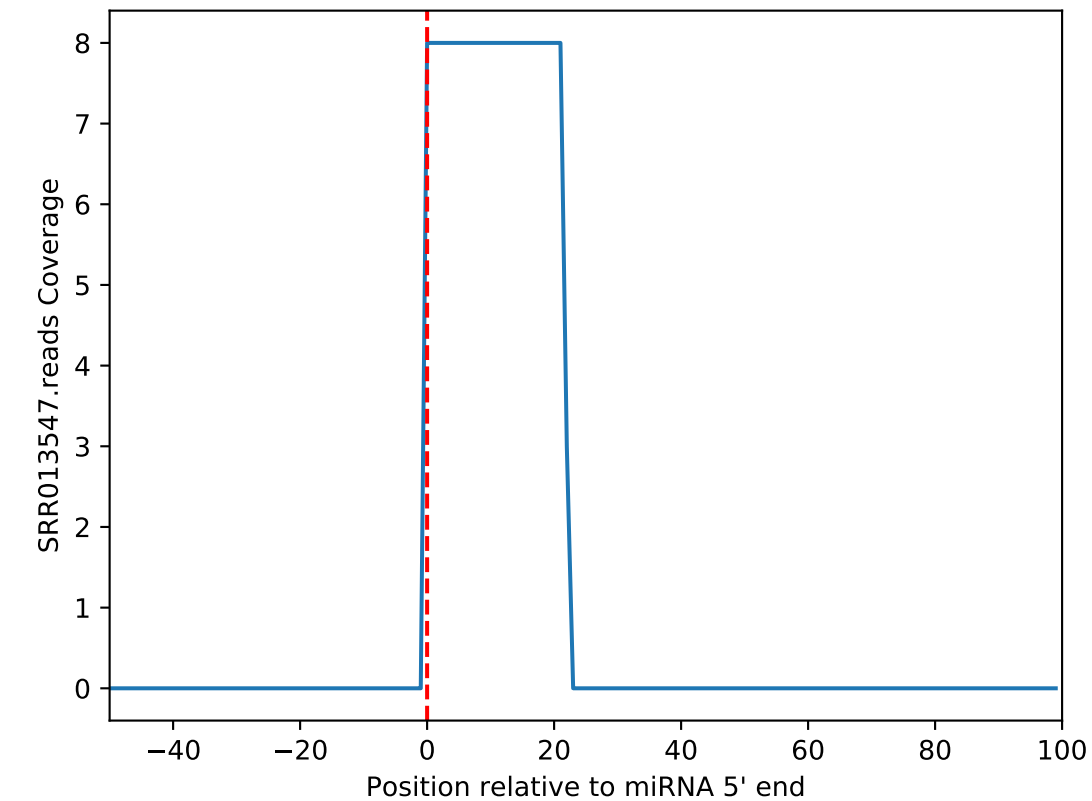

mir-316 (chr3L:21668787(-))

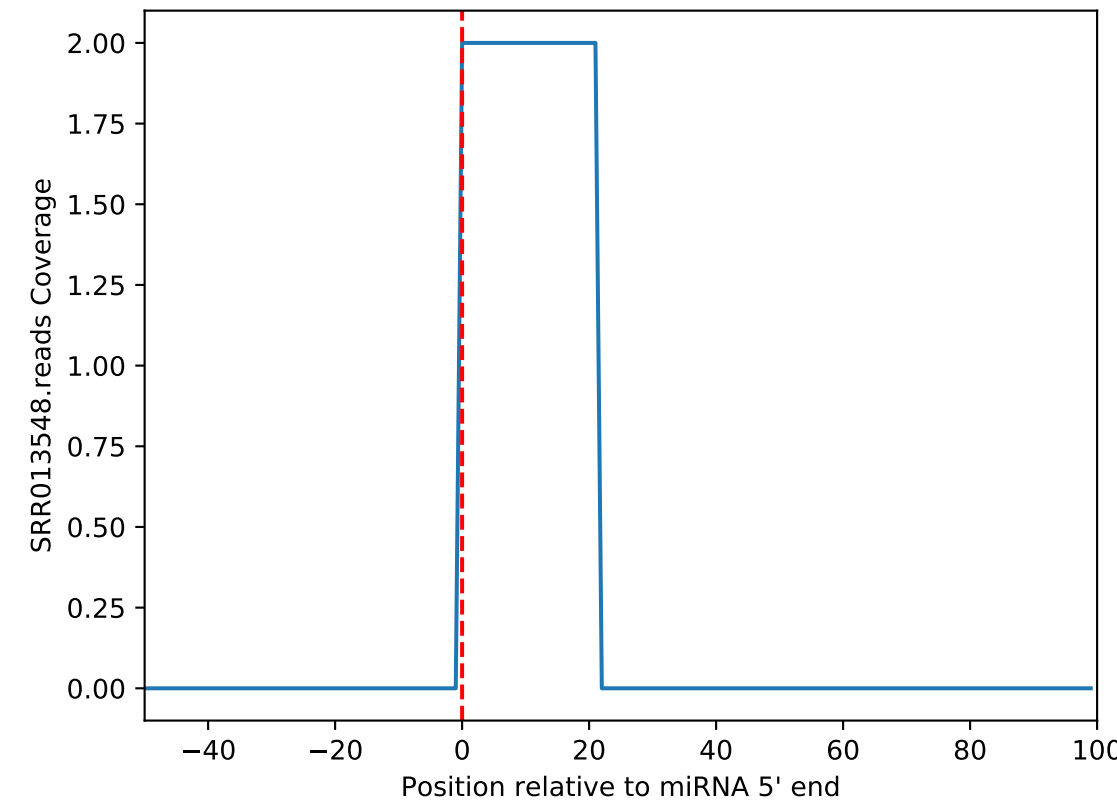

mir-996 (chr3R:29217202(+))

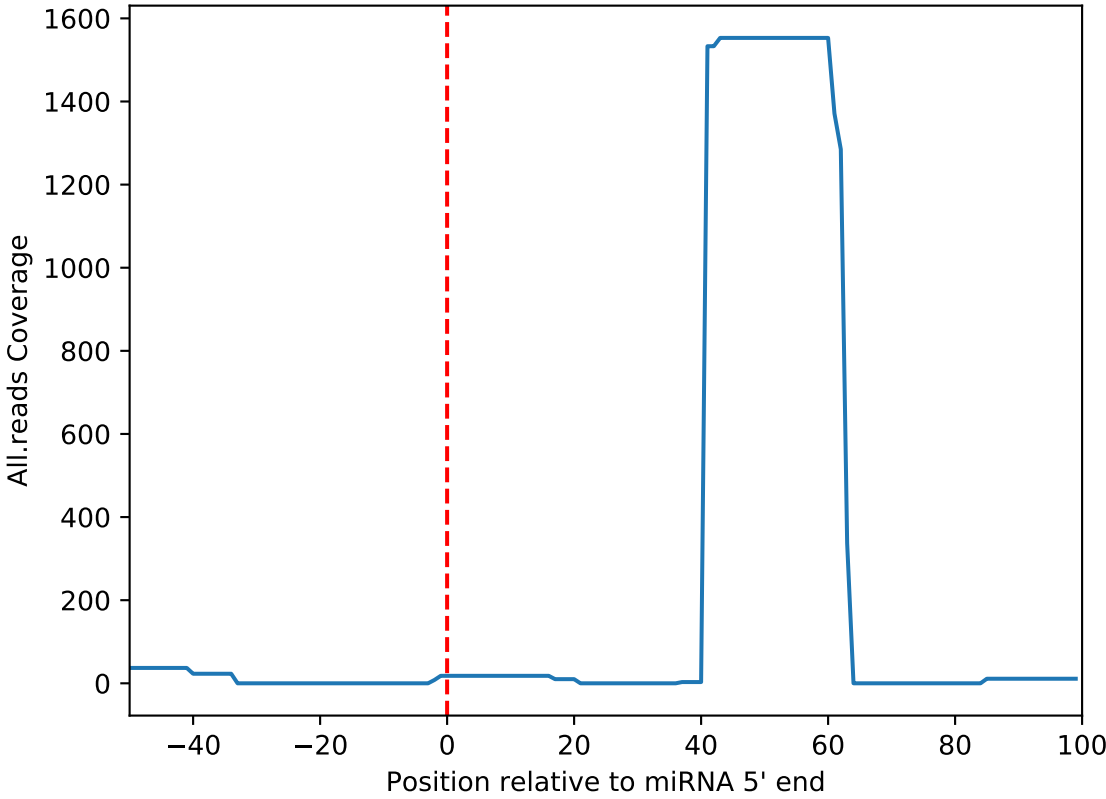

mir-996 (chr3R:29217202(+))

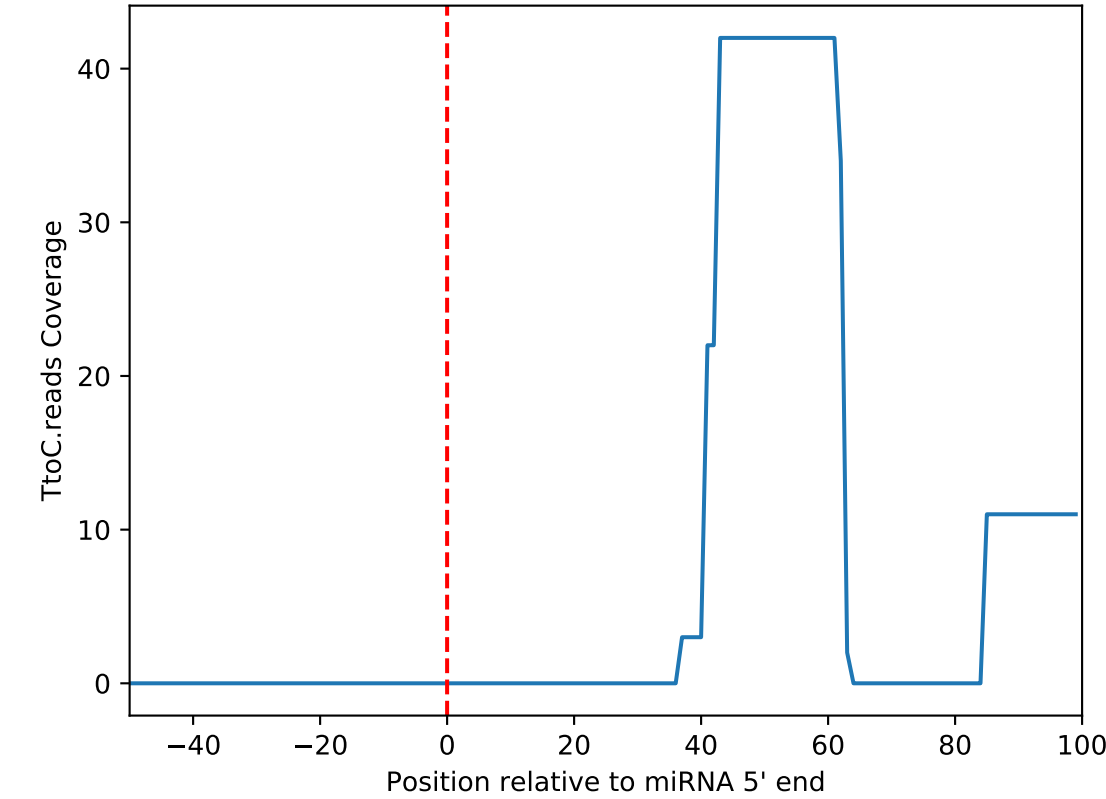

mir-996 (chr3R:29217202(+))

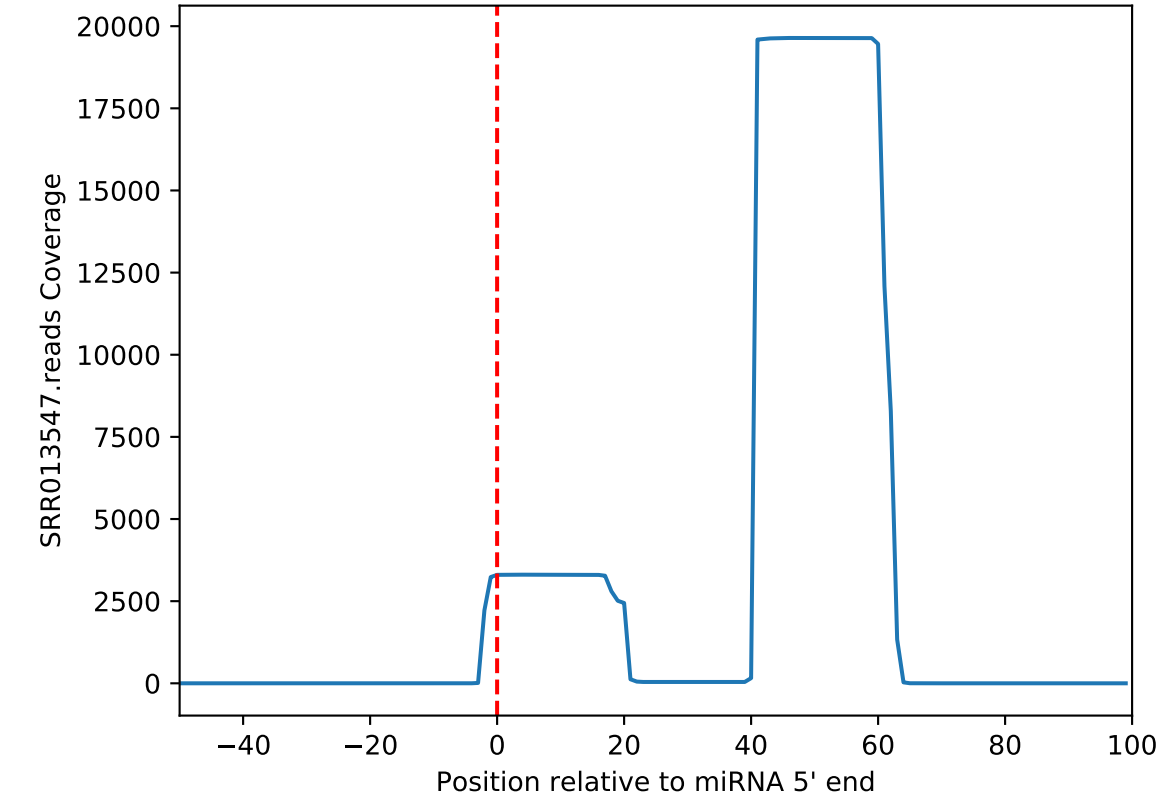

mir-996 (chr3R:29217202(+))

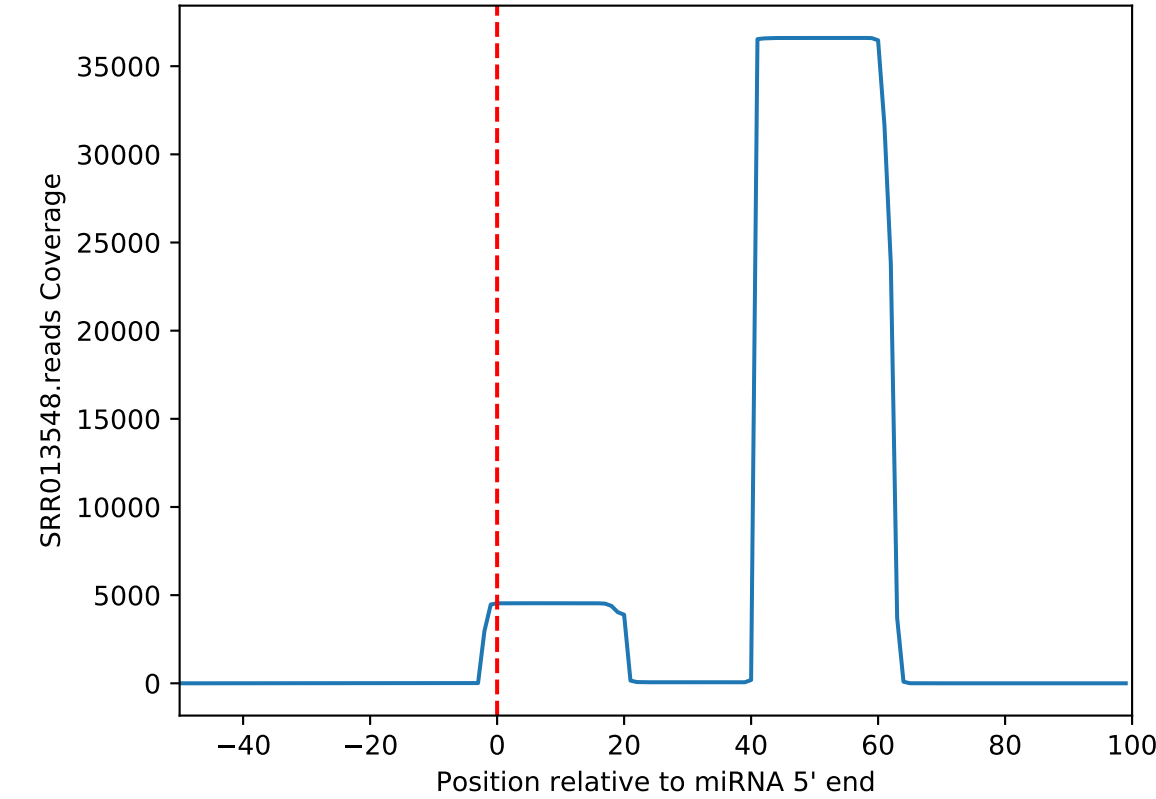

mir-92a (chr3R:25646522(+))

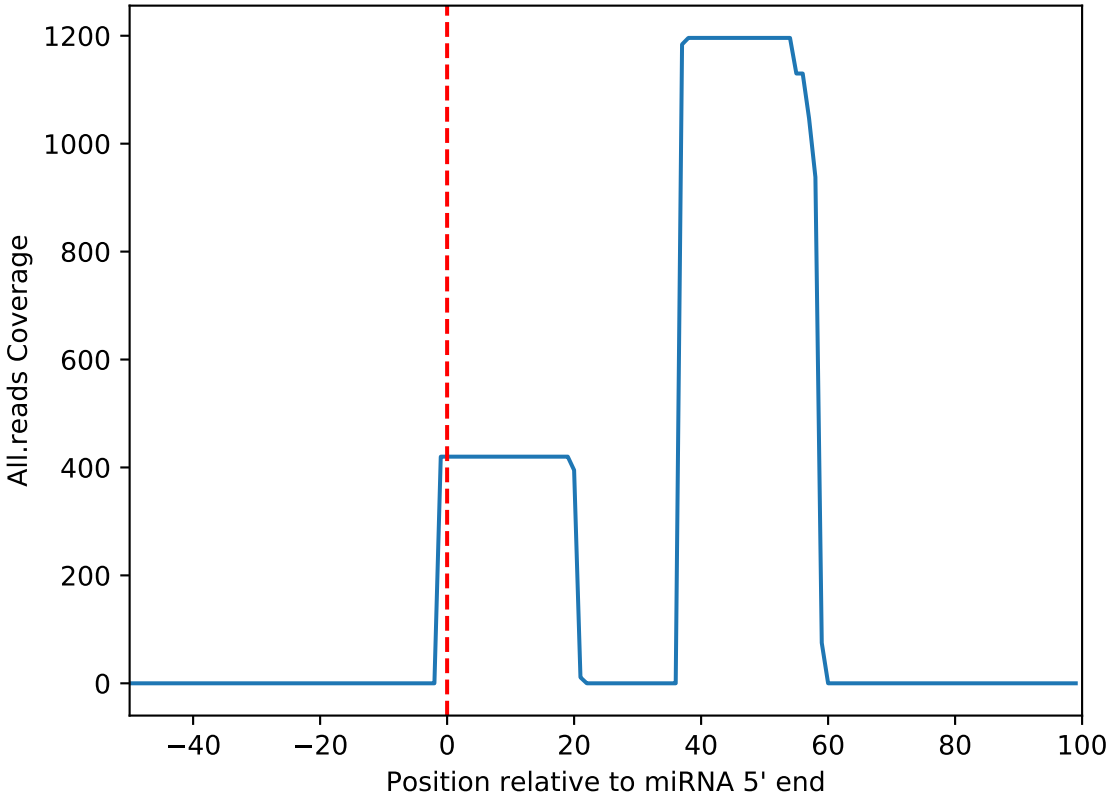

mir-92a (chr3R:25646522(+))

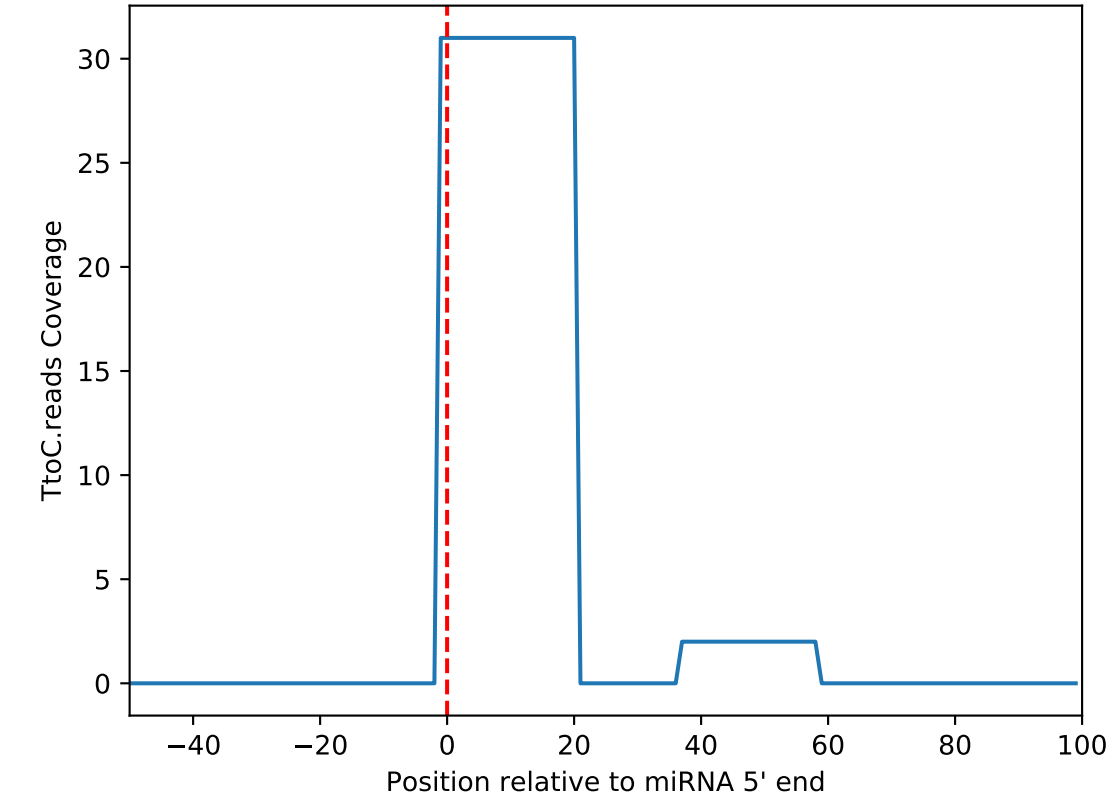

mir-92a (chr3R:25646522(+))

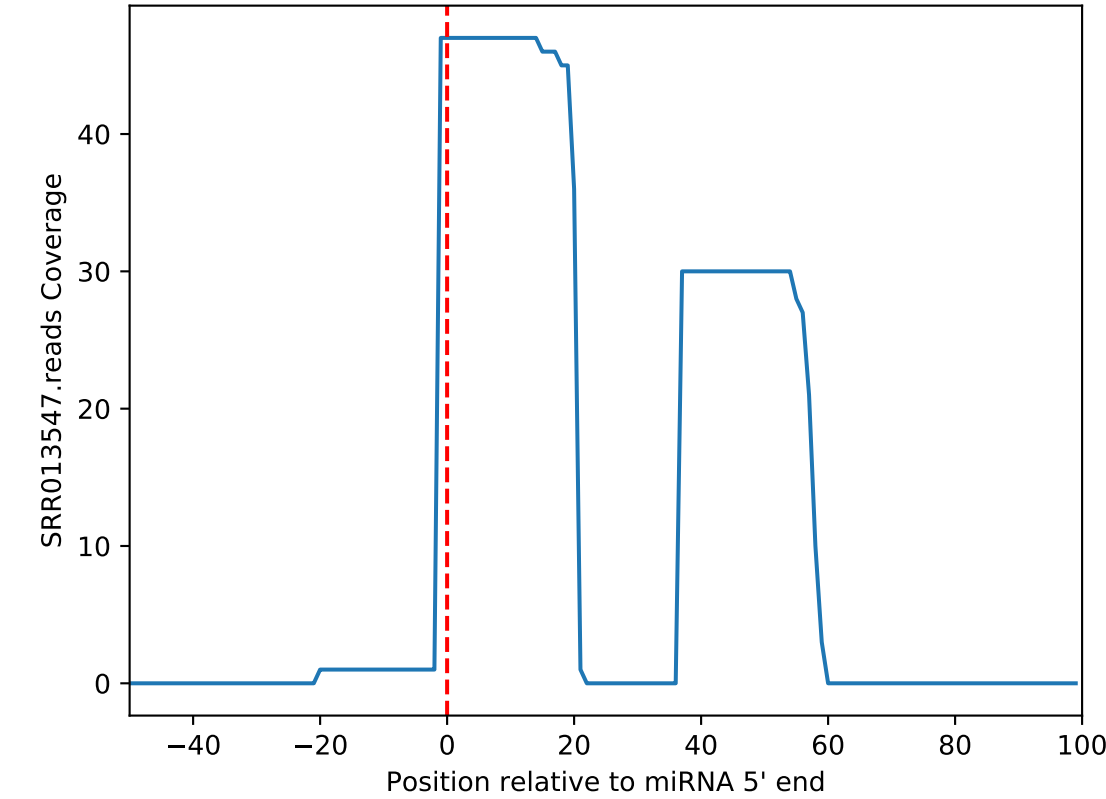

mir-92a (chr3R:25646522(+))

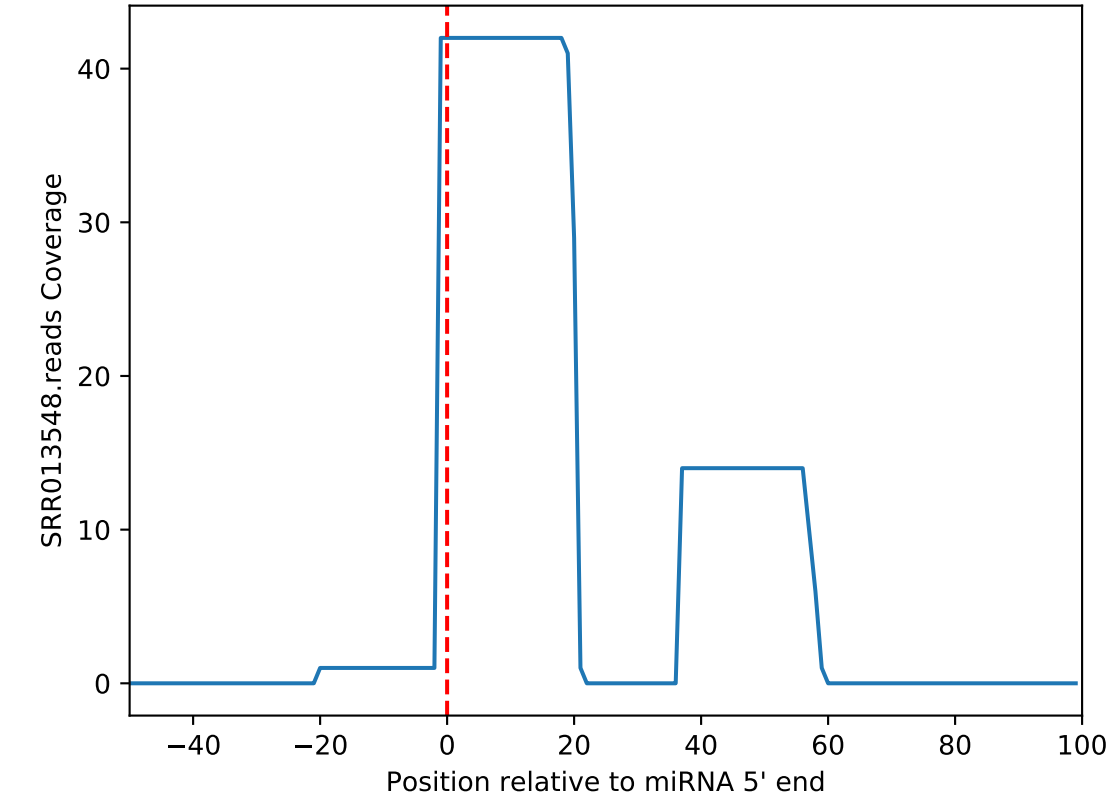

mir-275 (chr2L:7425814(+))

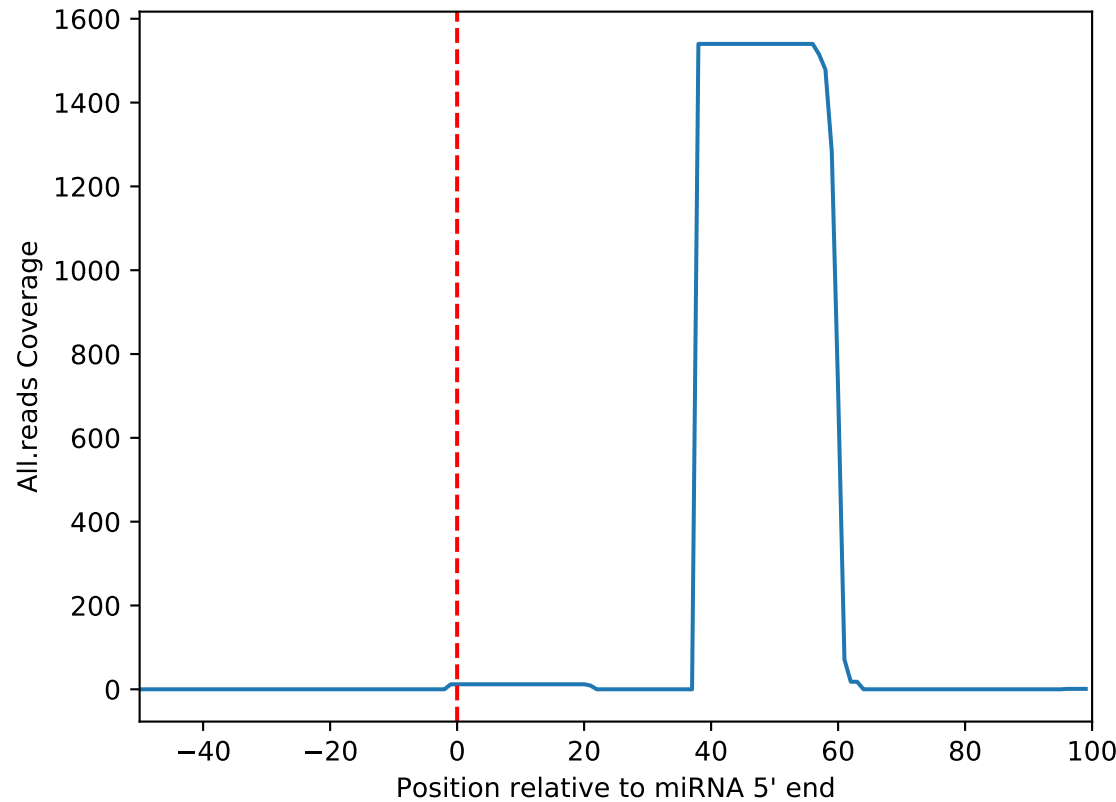

mir-275 (chr2L:7425814(+))

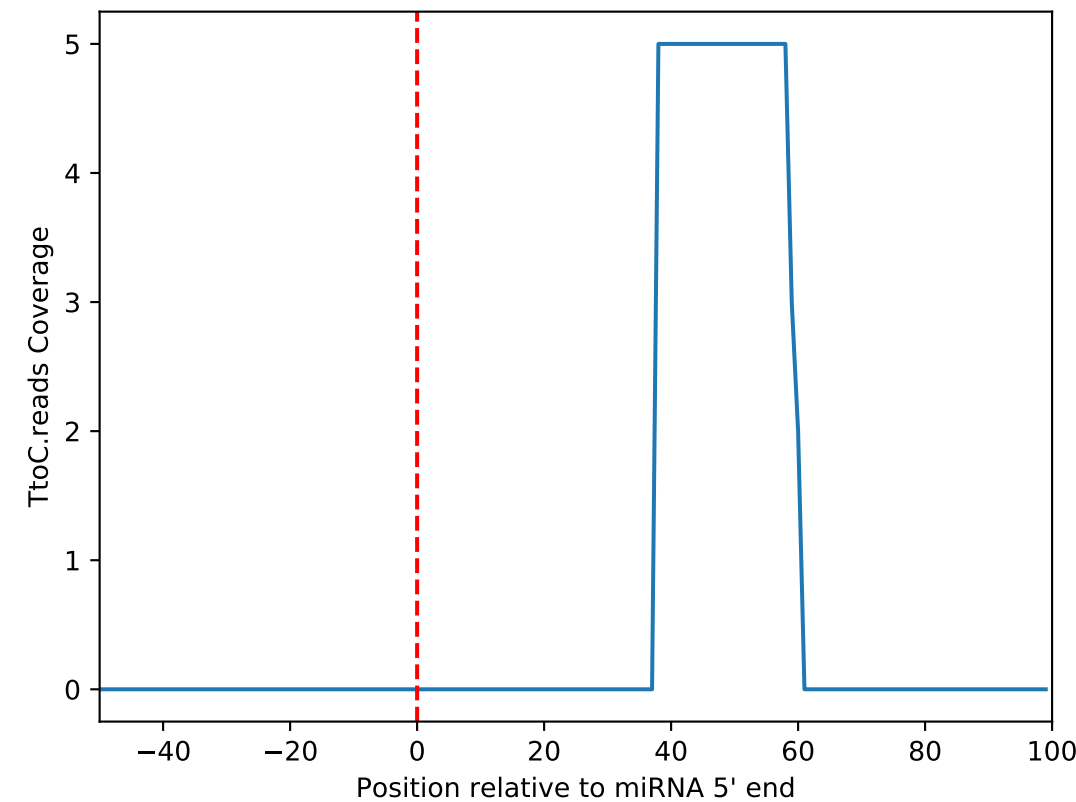

mir-275 (chr2L:7425814(+))

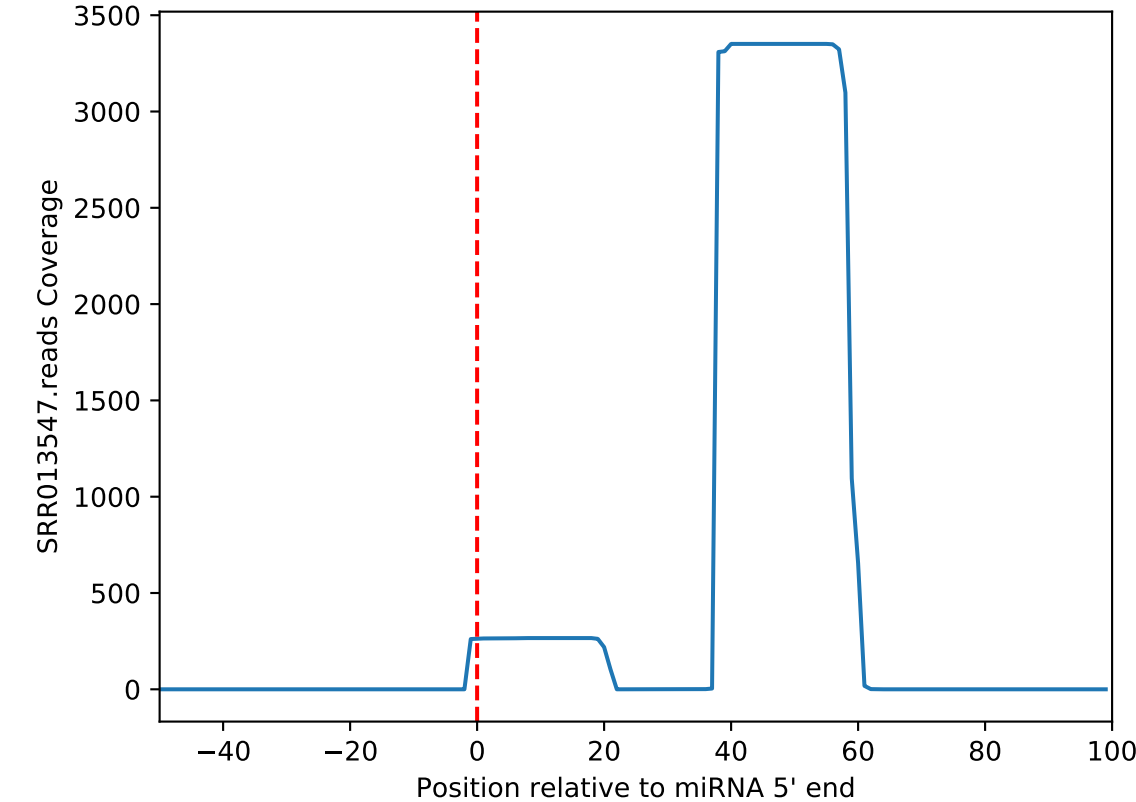

mir-275 (chr2L:7425814(+))

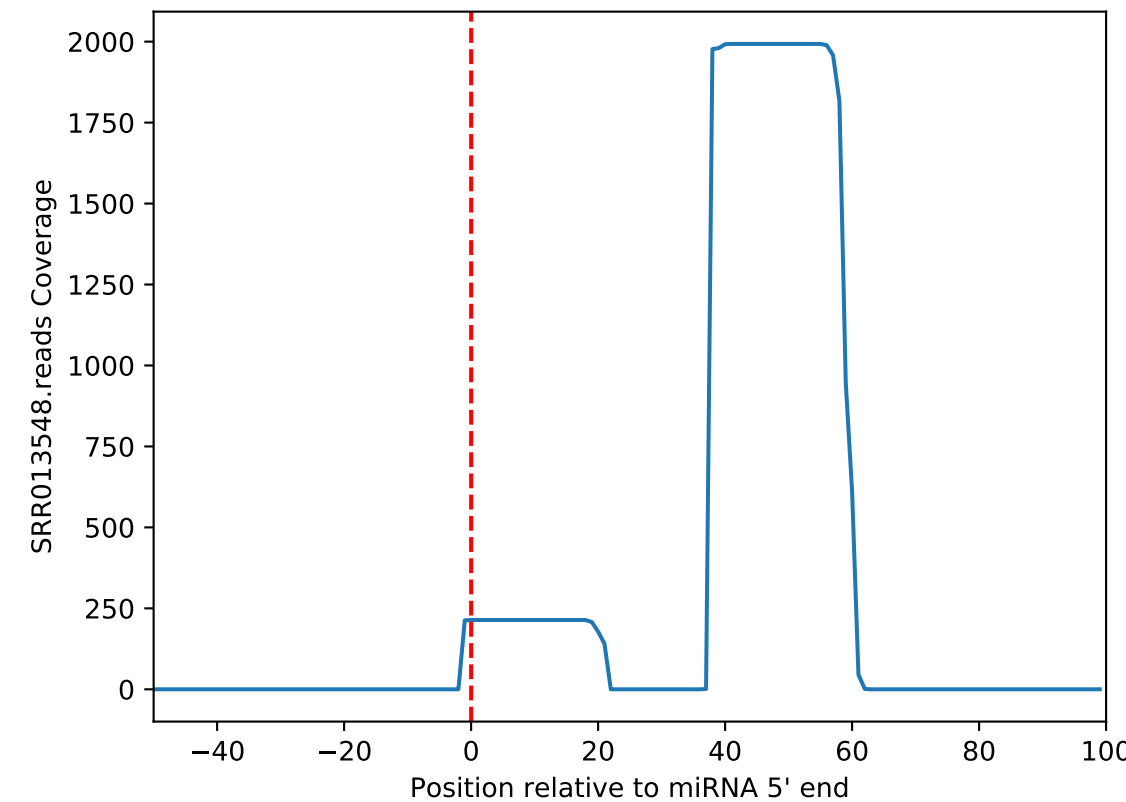

mir-31a (chr2R:17783873(-))

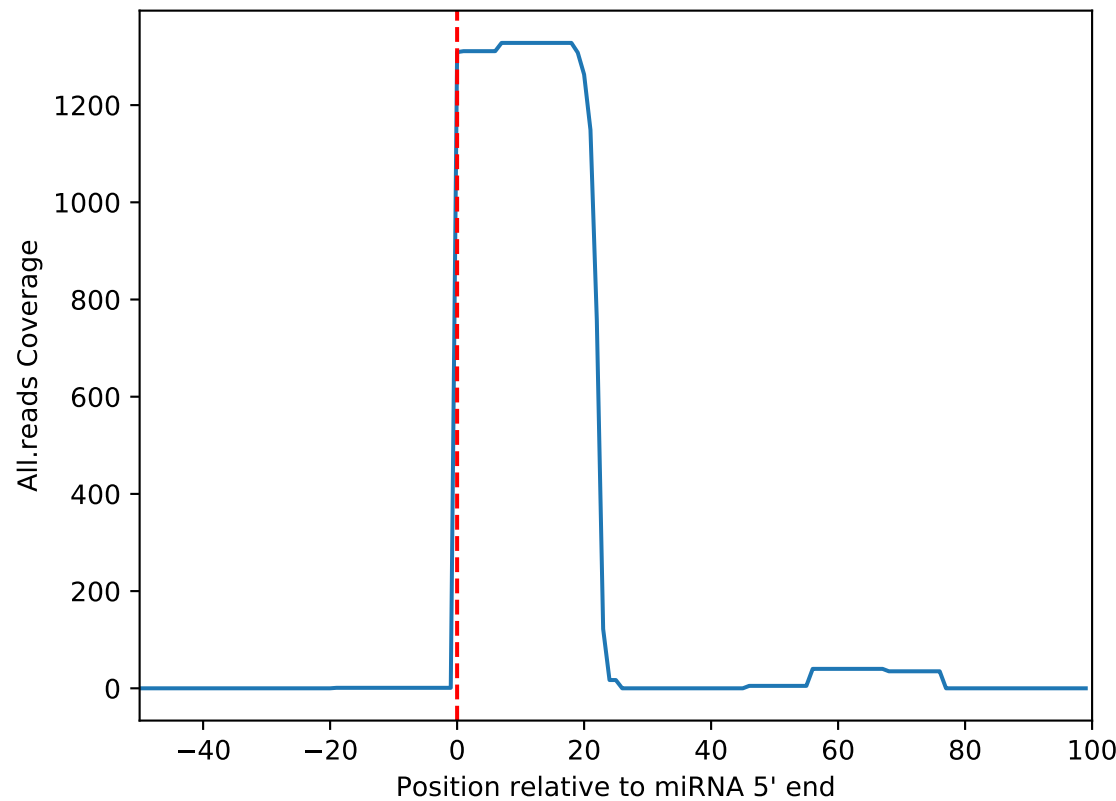

mir-31a (chr2R:17783873(-))

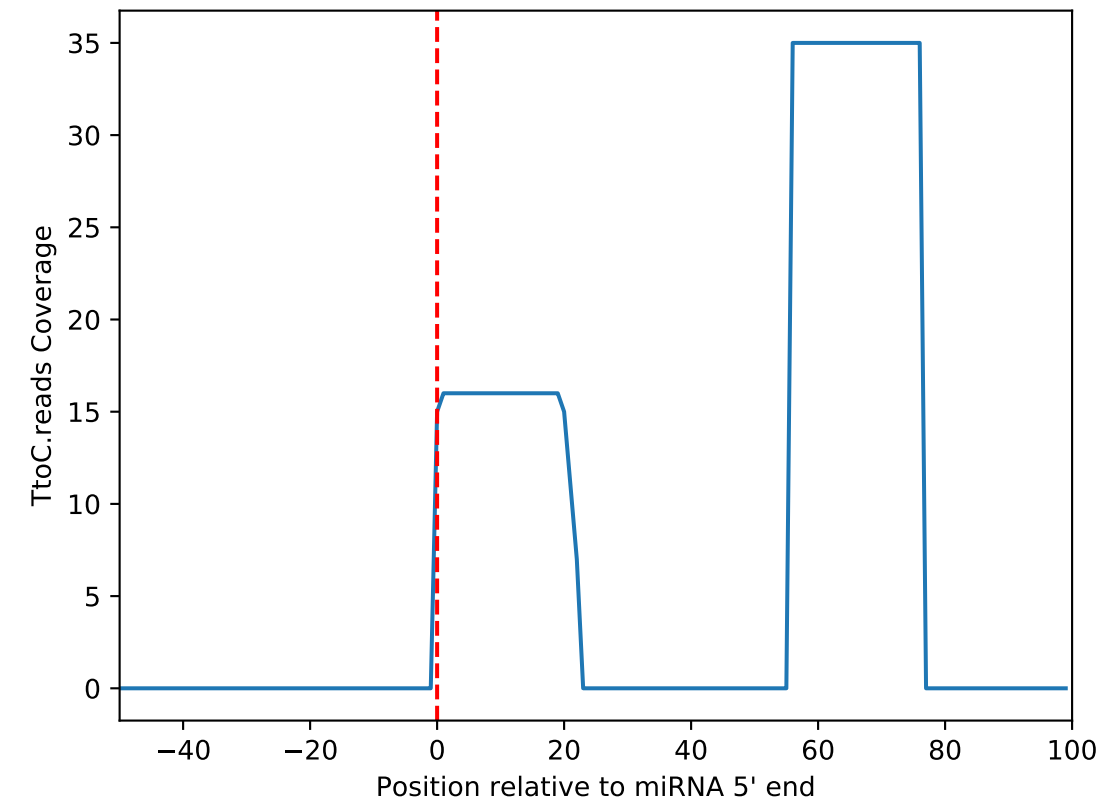

mir-31a (chr2R:17783873(-))

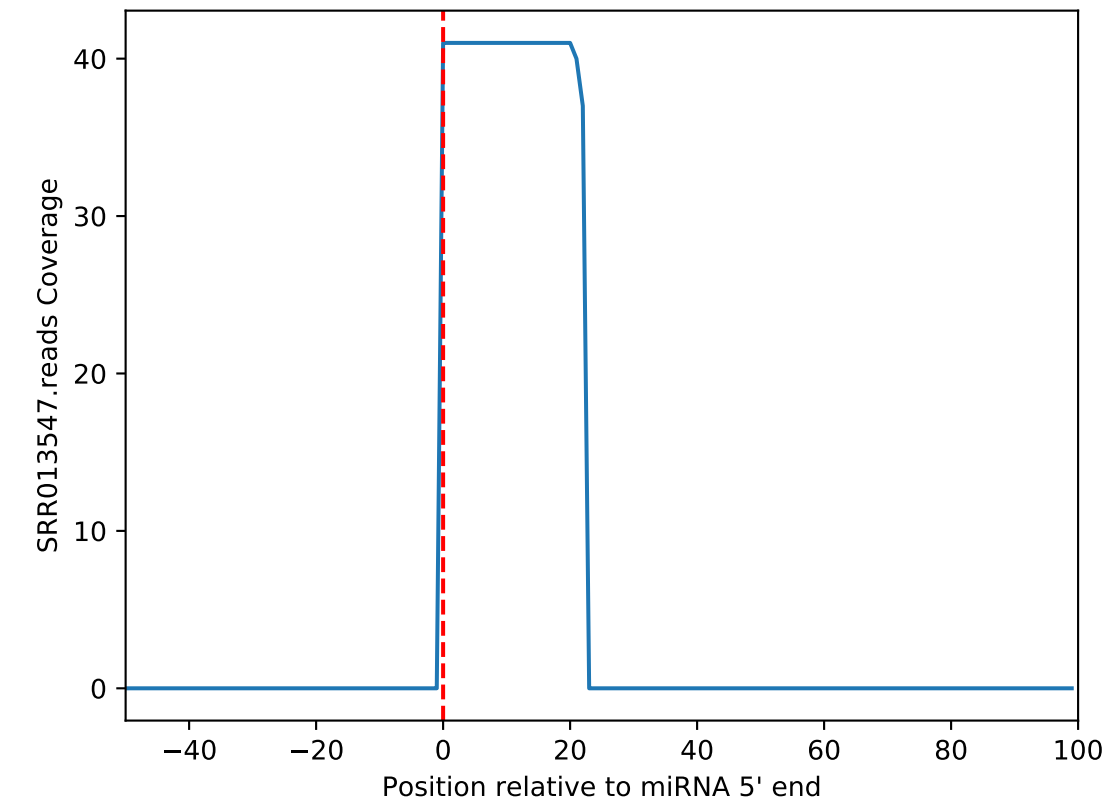

mir-31a (chr2R:17783873(-))

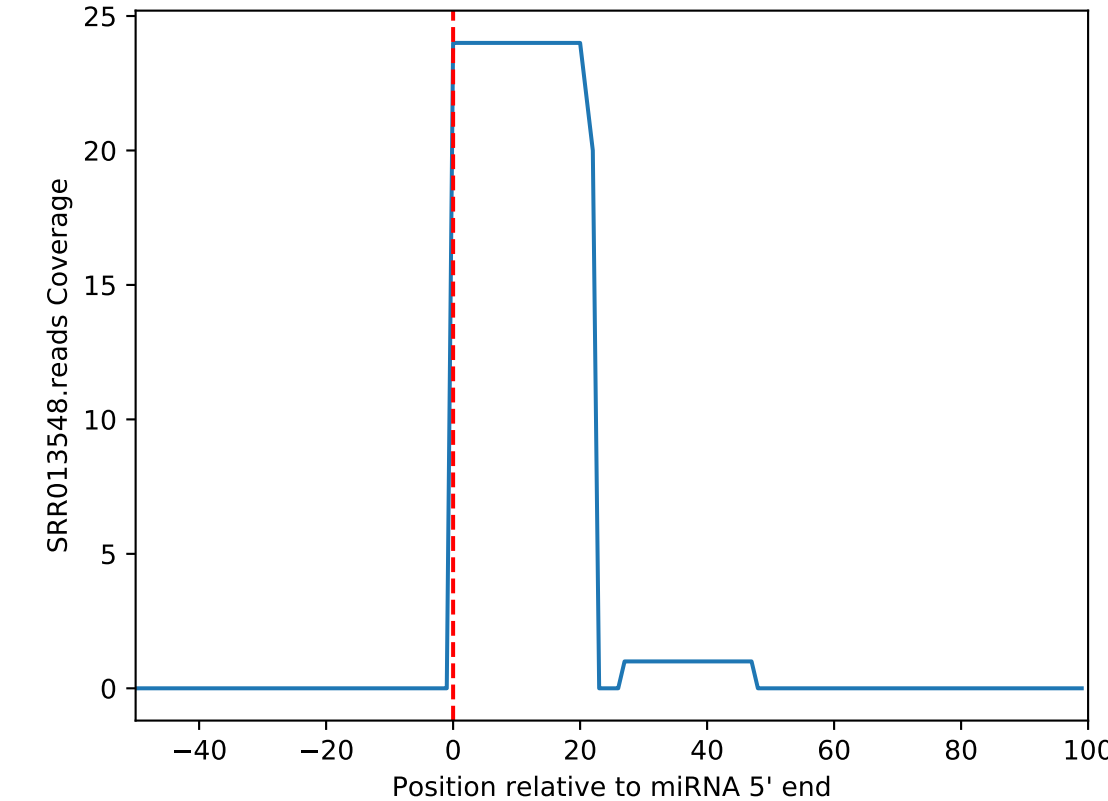

mir-965 (chr2L:243118(-))

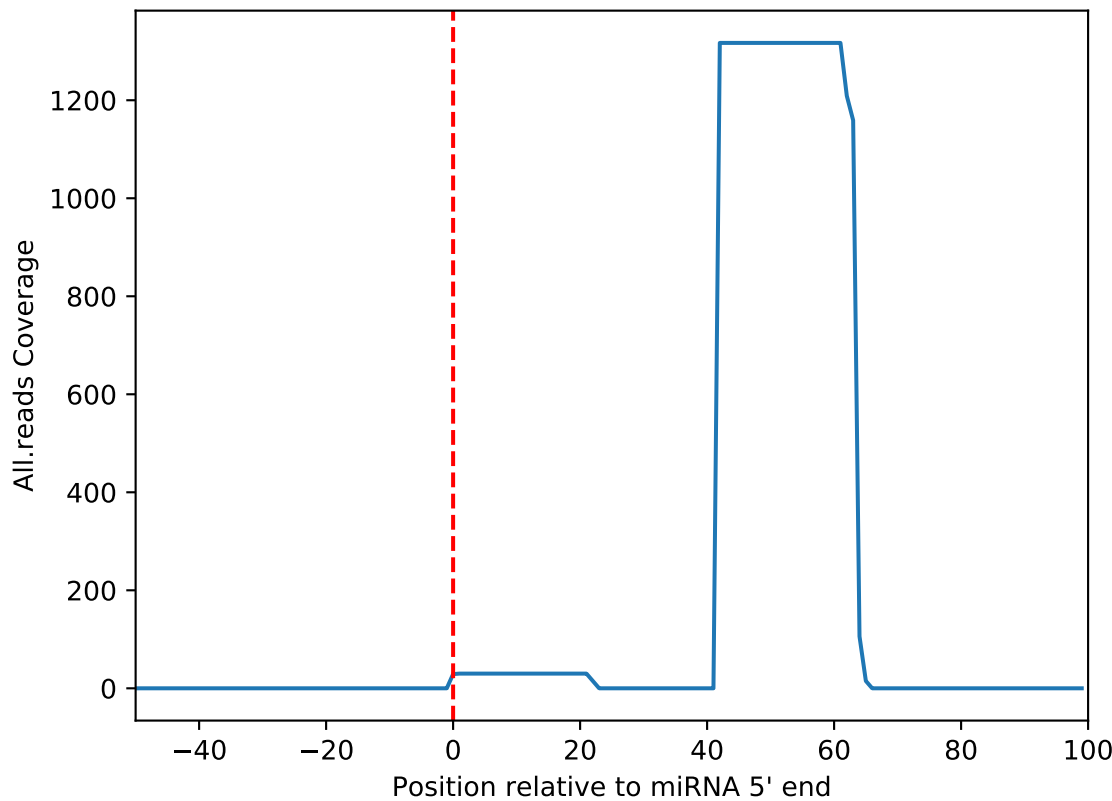

mir-965 (chr2L:243118(-))

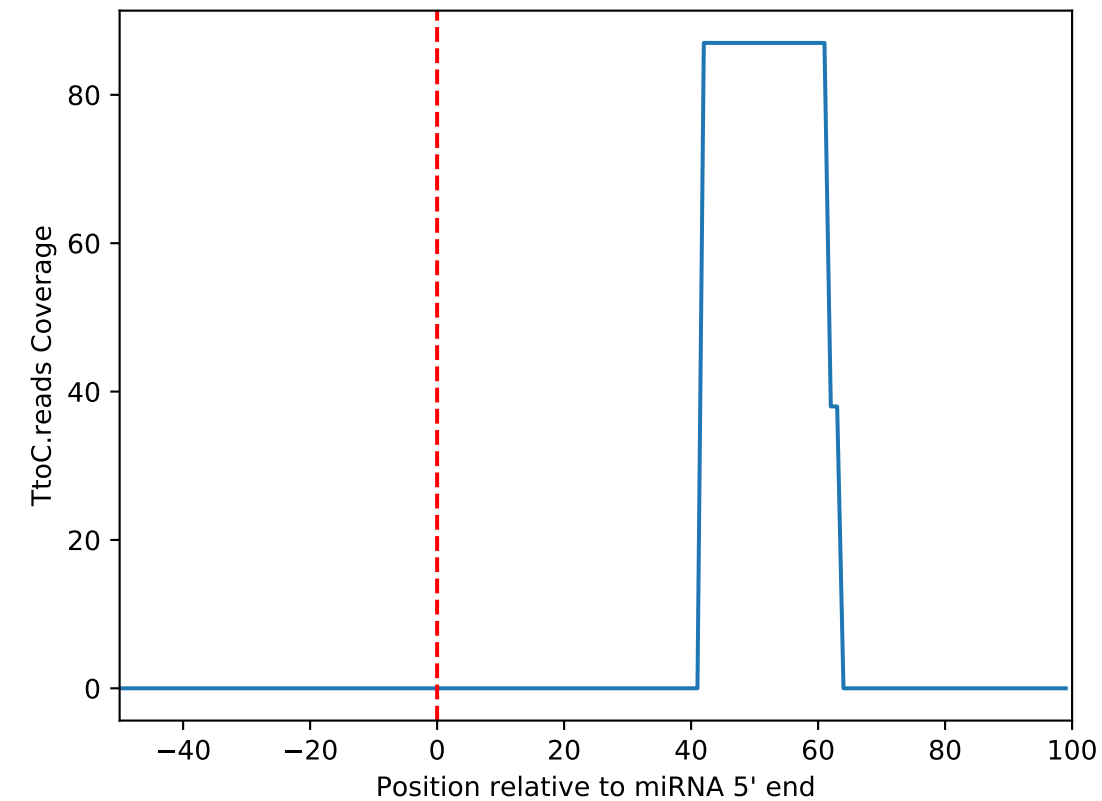

mir-965 (chr2L:243118(-))

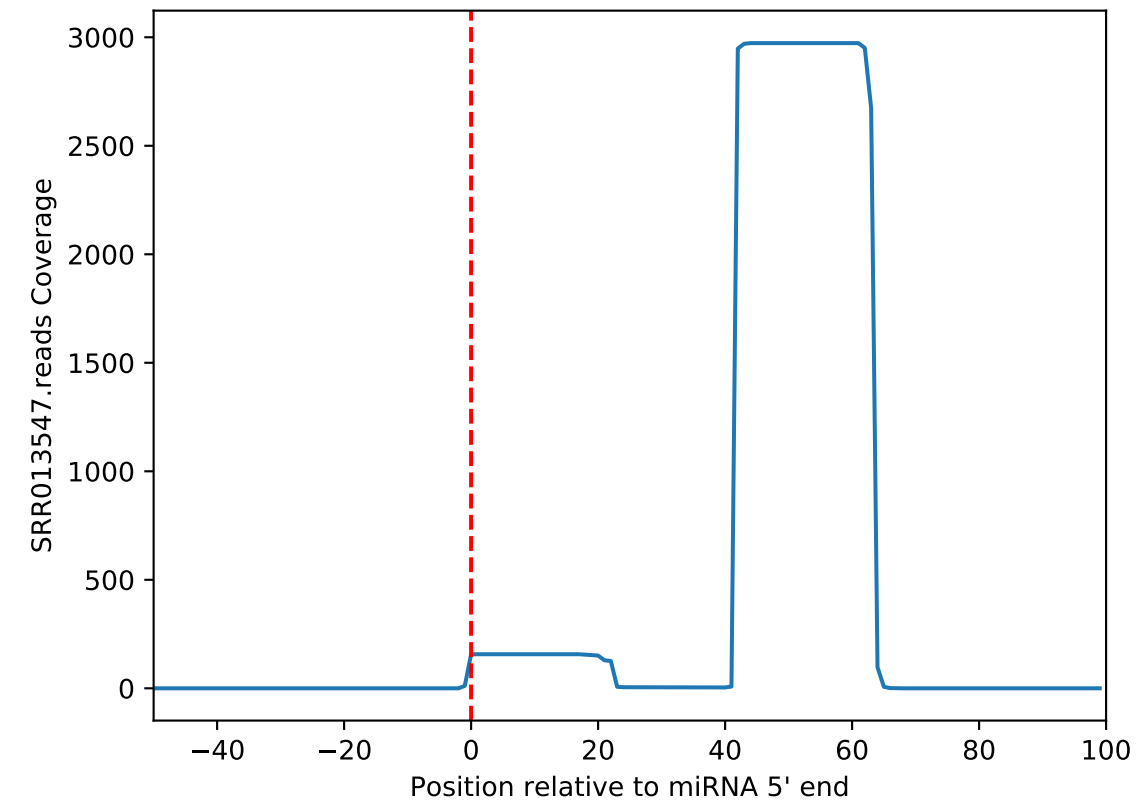

mir-965 (chr2L:243118(-))

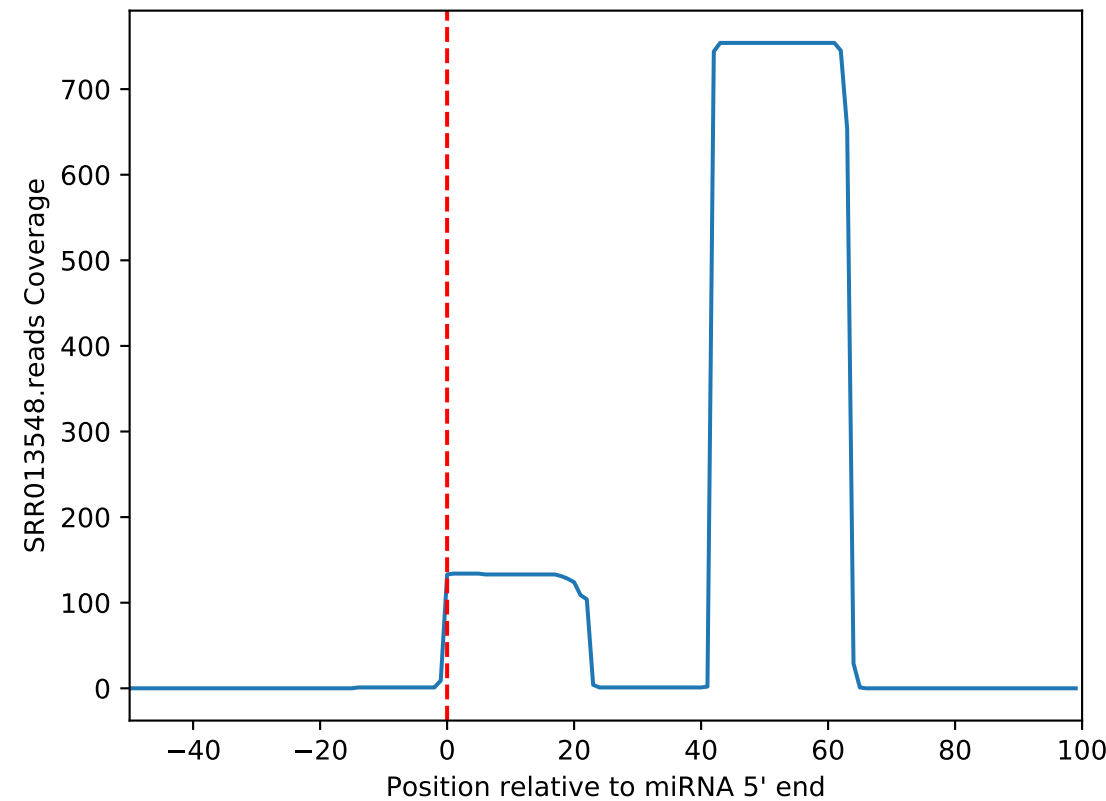



mir-977 (chrX:19559046(+))

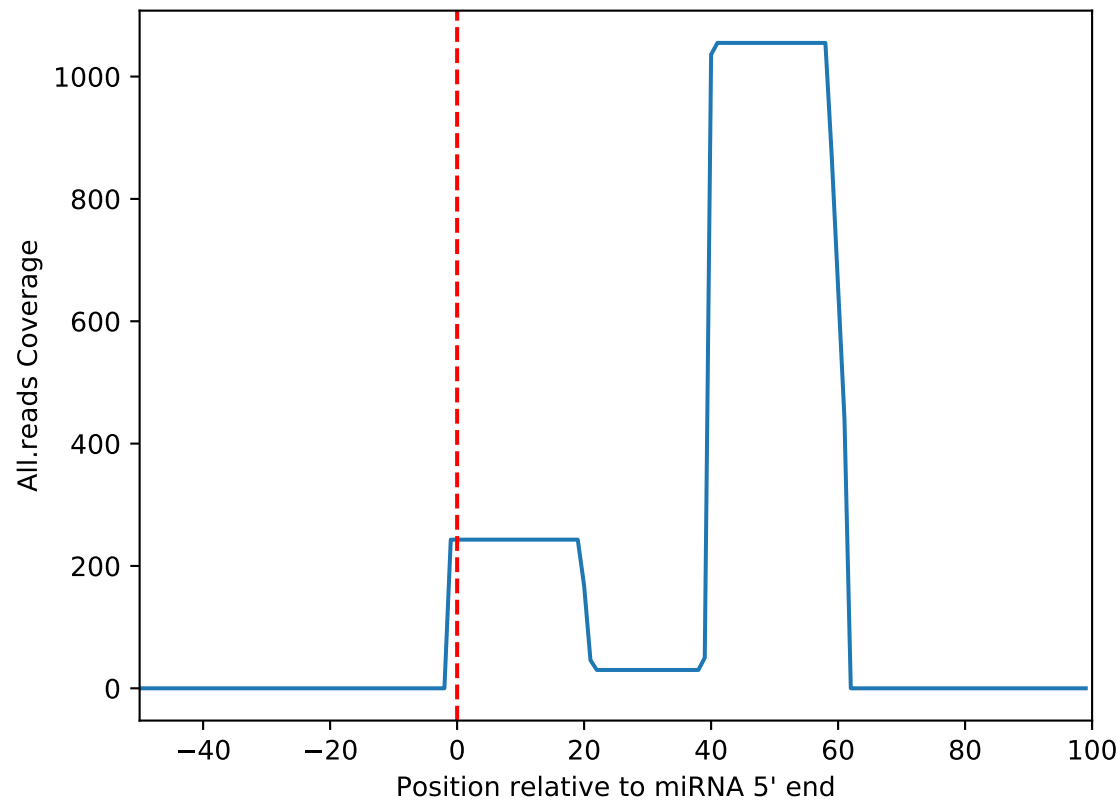

mir-977 (chrX:19559046(+))

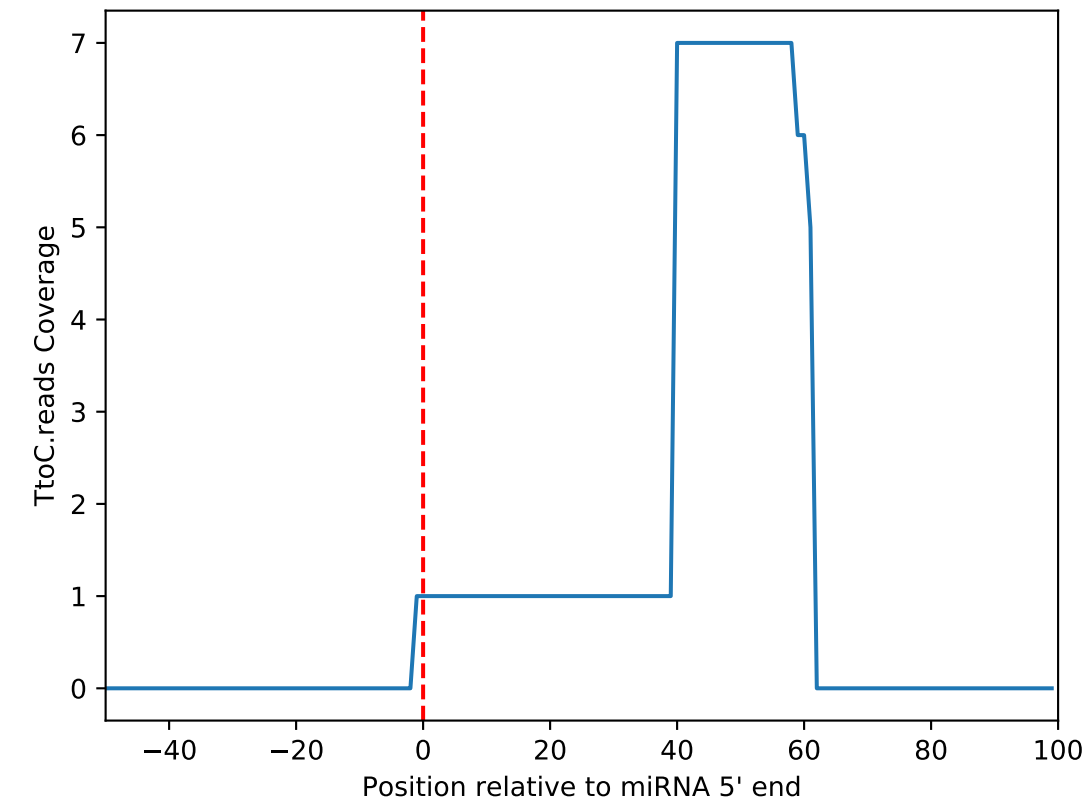

mir-977 (chrX:19559046(+))

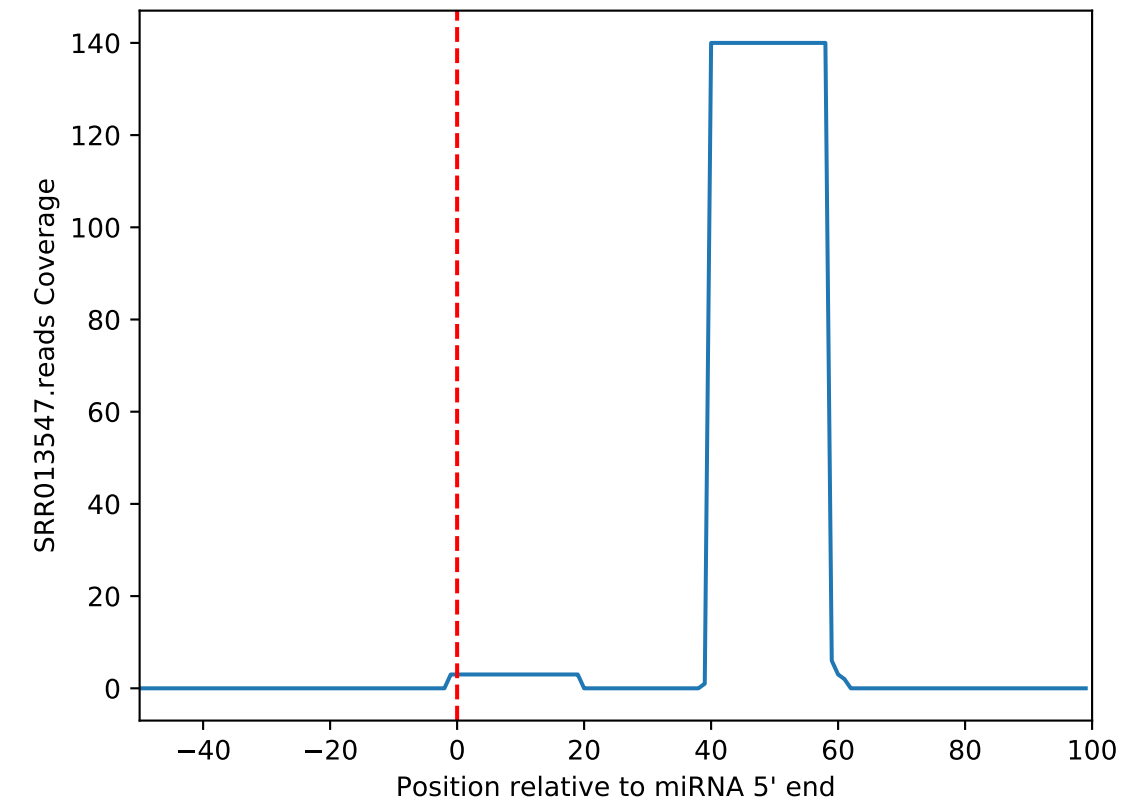

mir-977 (chrX:19559046(+))

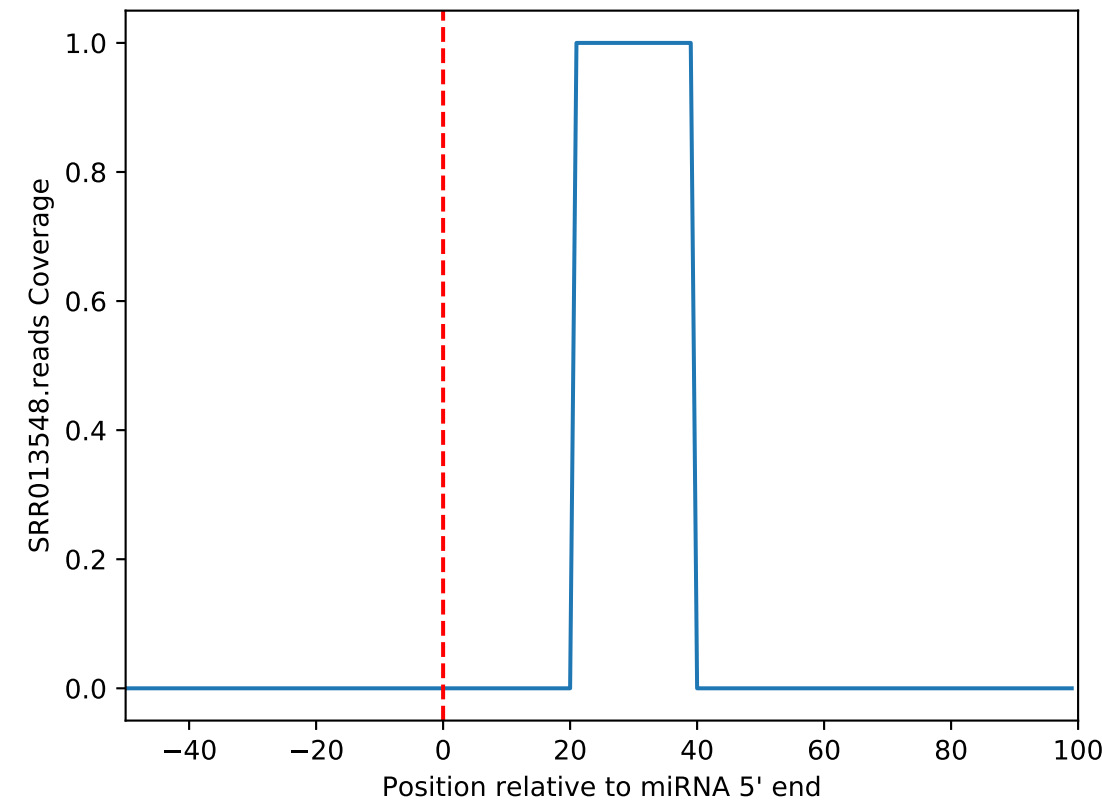

mir-310 (chr2R:20583825(-))

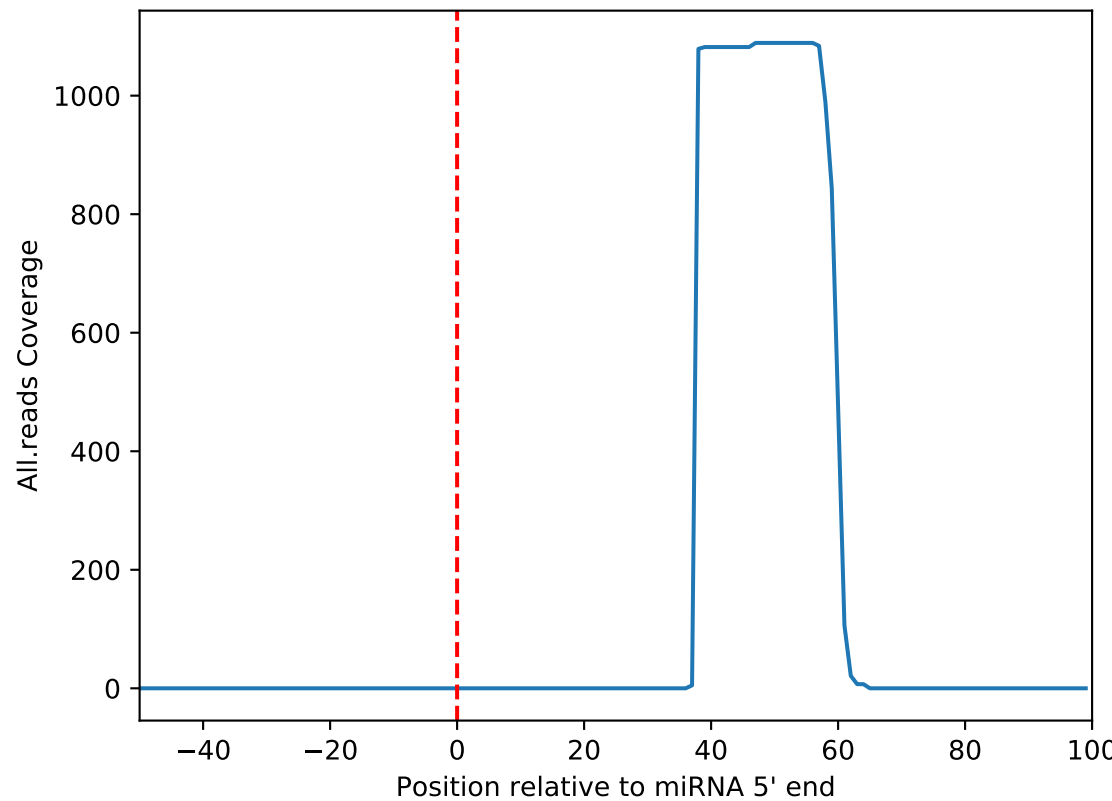

mir-310 (chr2R:20583825(-))

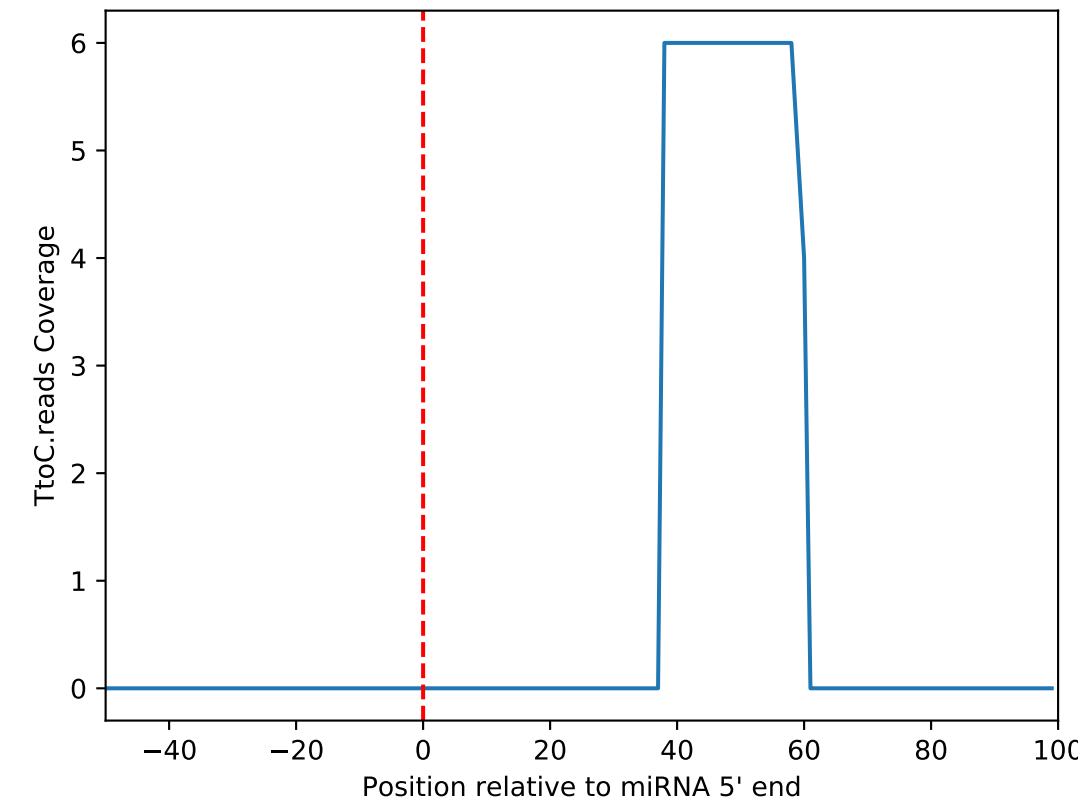

mir-310 (chr2R:20583825(-))

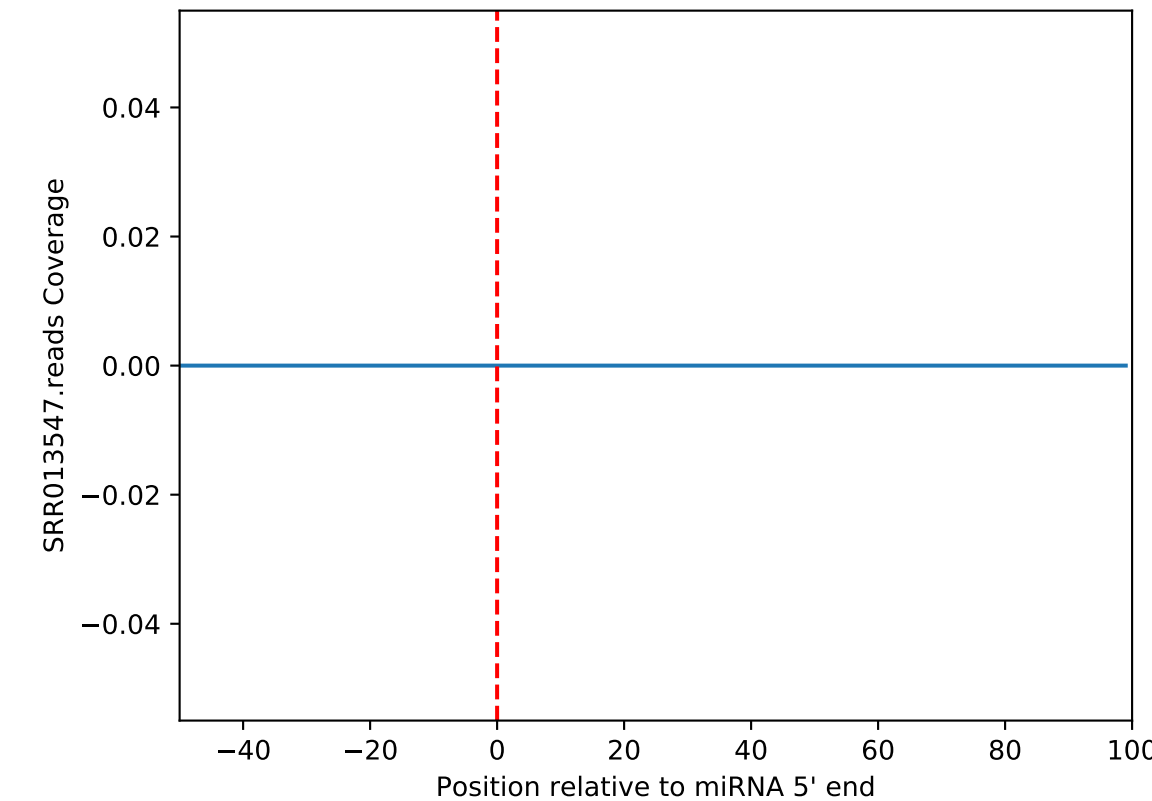

mir-310 (chr2R:20583825(-))

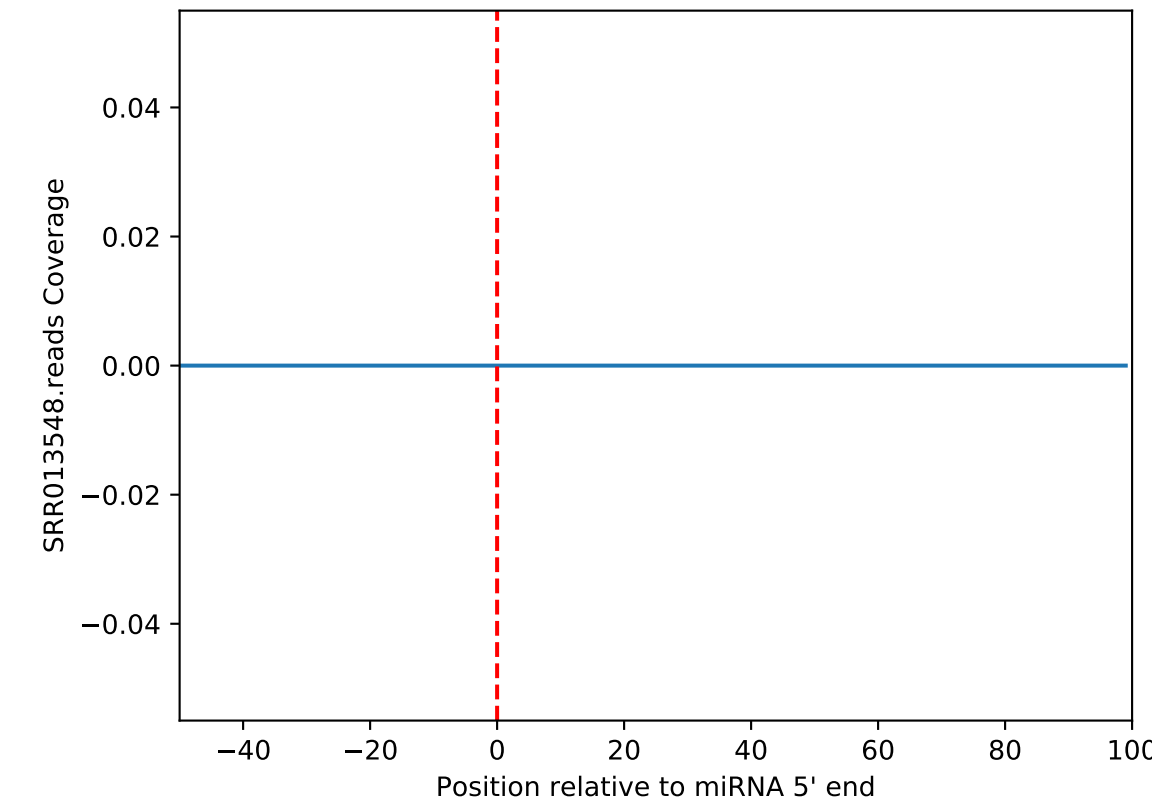

mir-961 (chr2L:5641208(+))

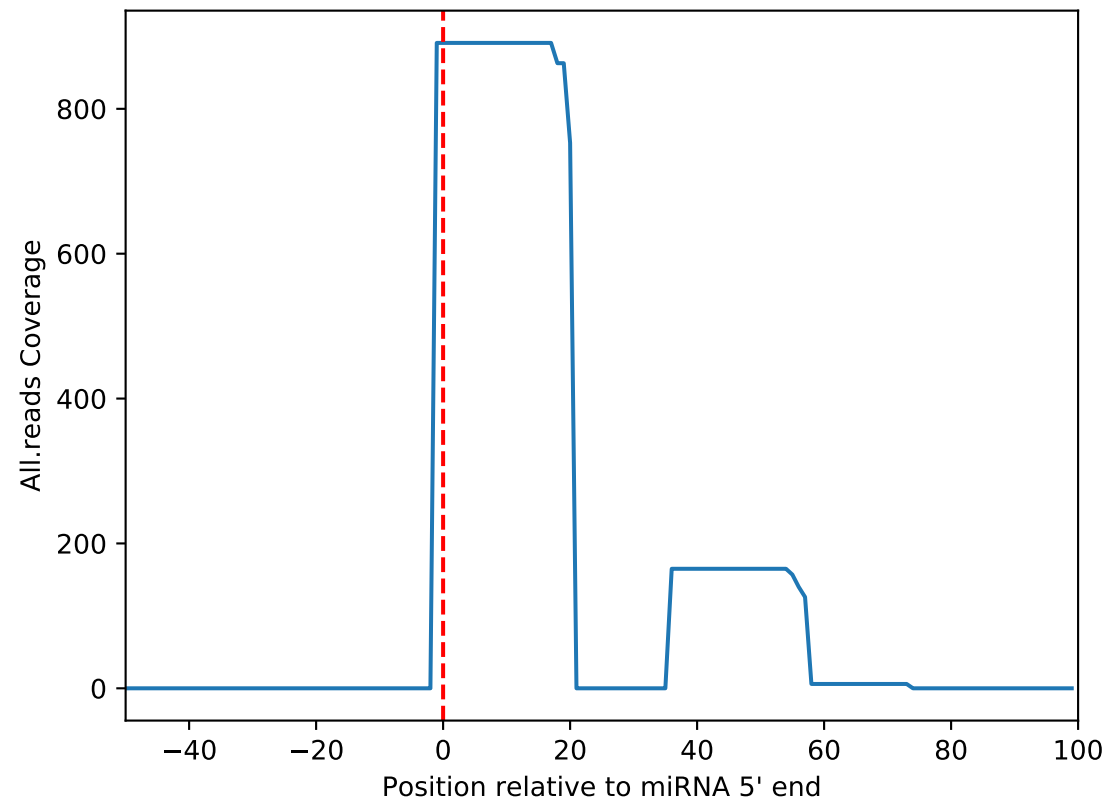

mir-961 (chr2L:5641208(+))

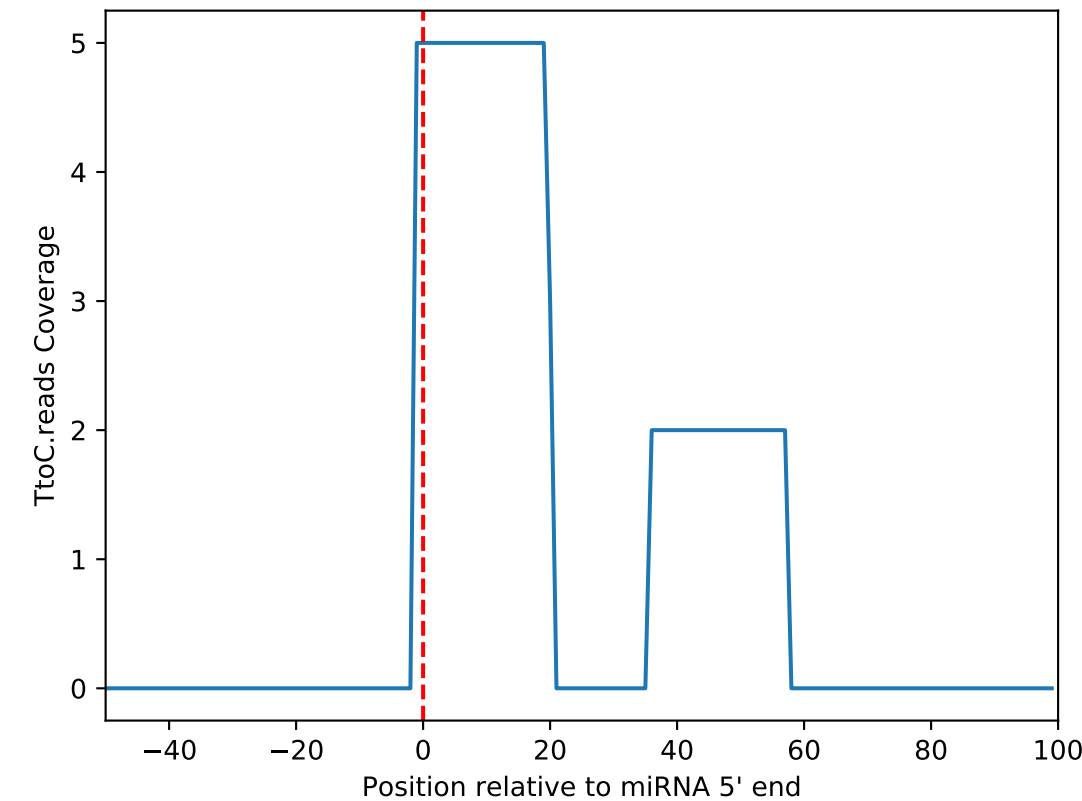

mir-961 (chr2L:5641208(+))

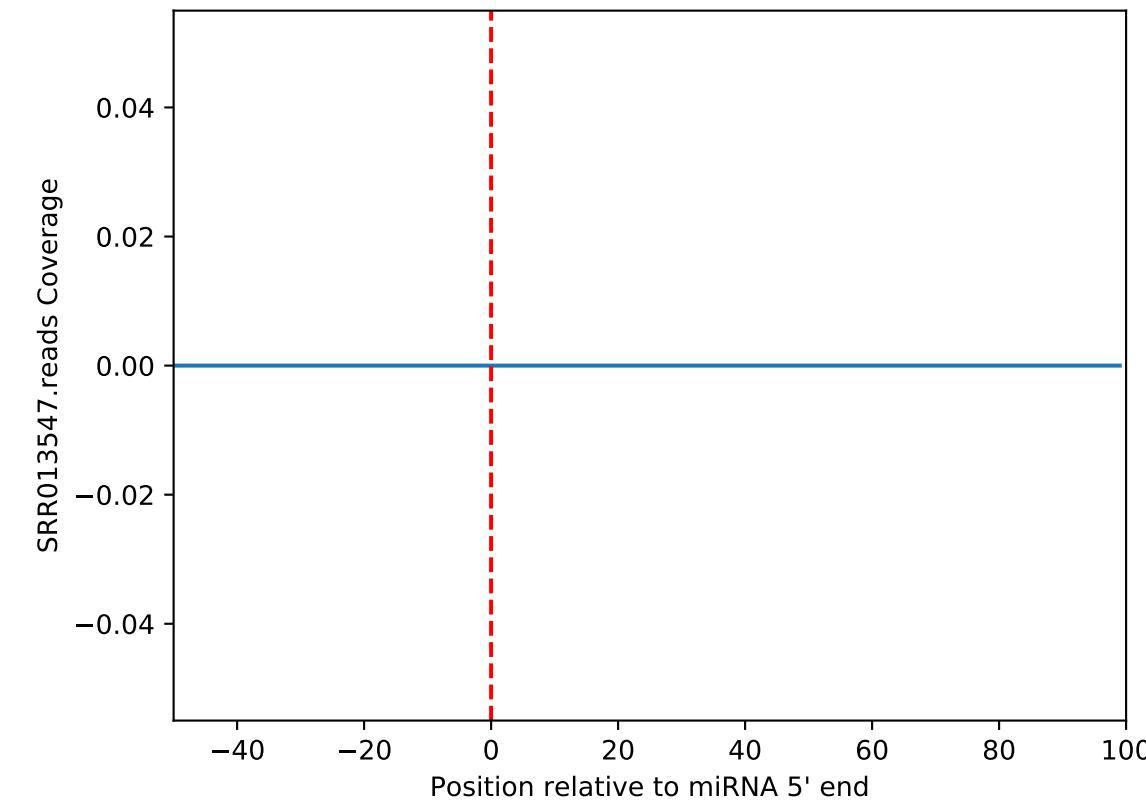

mir-961 (chr2L:5641208(+))

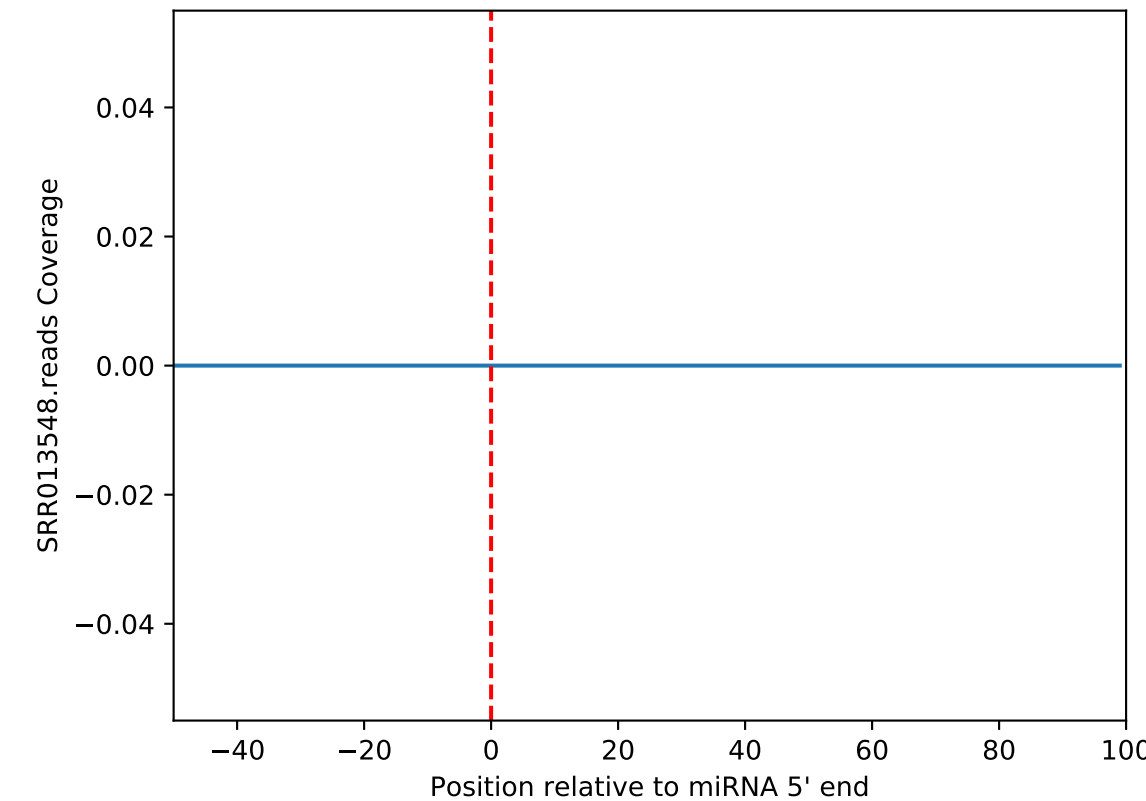

mir-263a (chr2L:11953486(-))

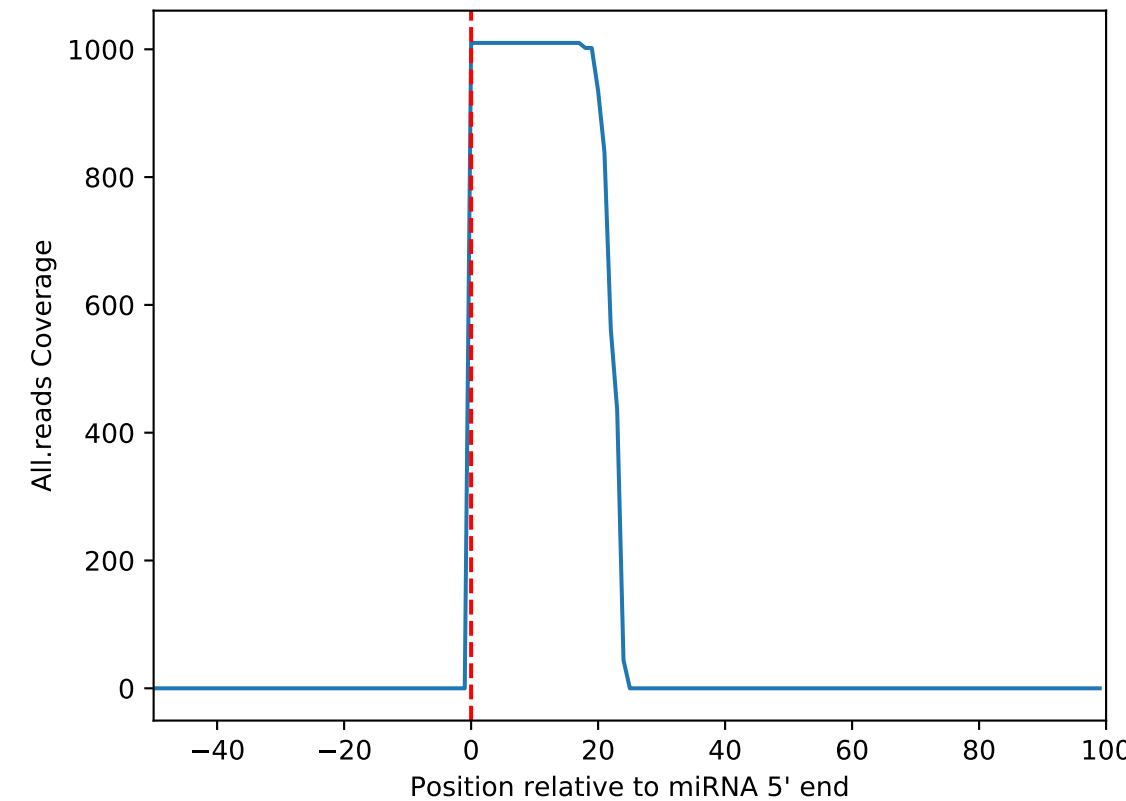

mir-263a (chr2L:11953486(-))

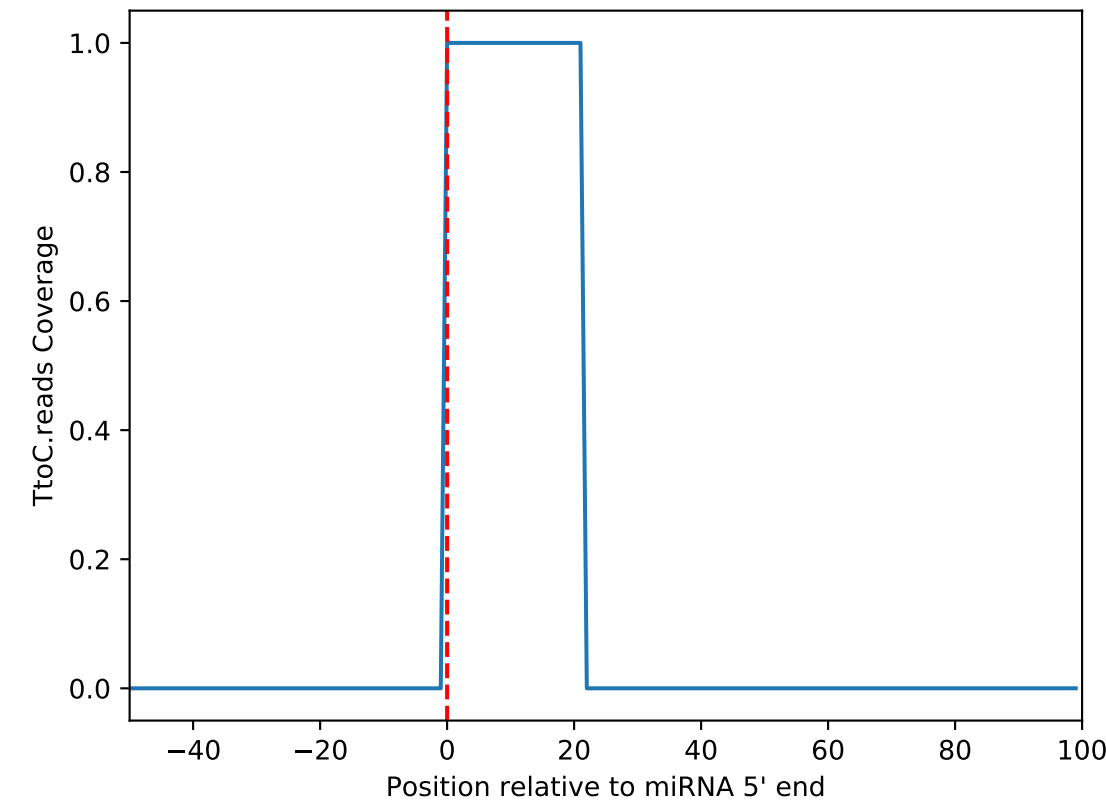

mir-263a (chr2L:11953486(-))

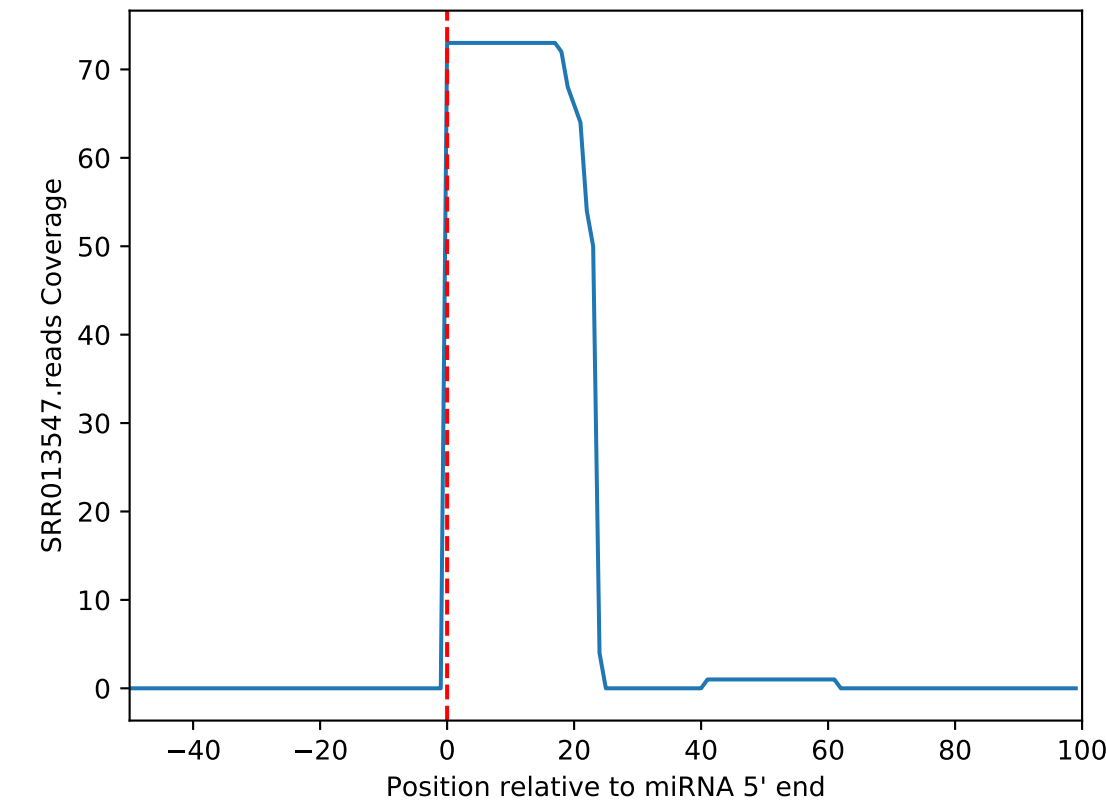

mir-263a (chr2L:11953486(-))

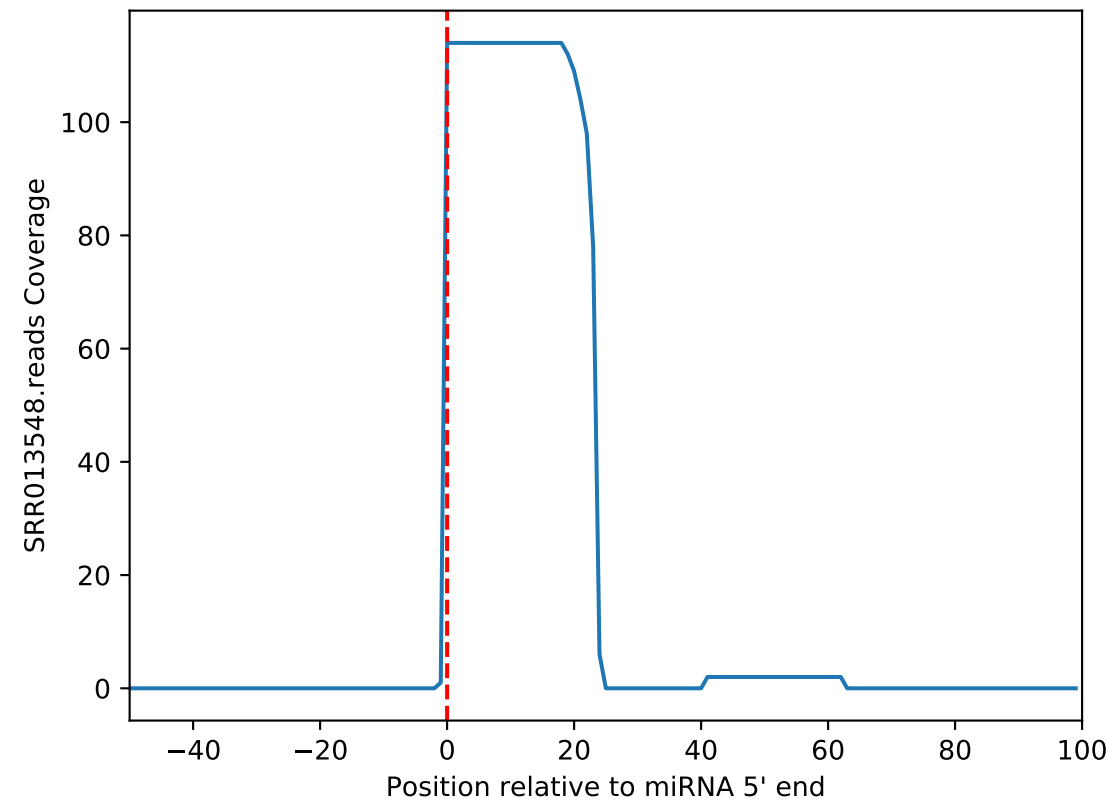

mir-998 (chr3R:21621998(-))

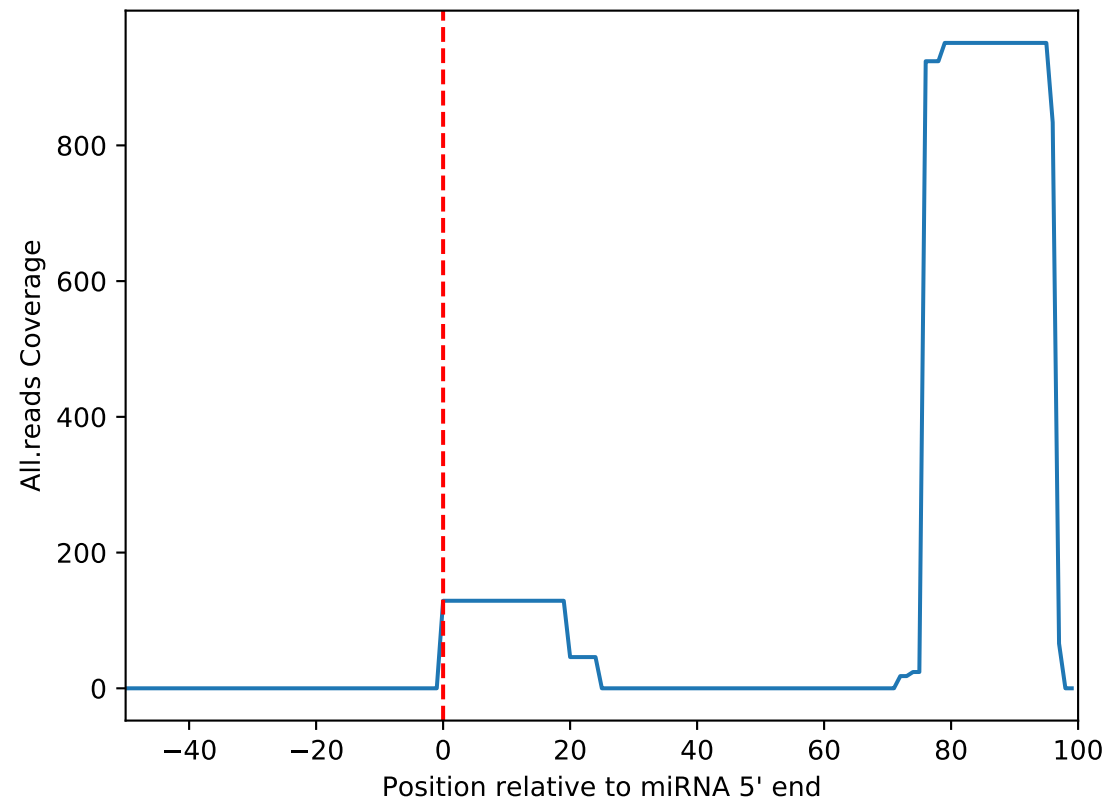

mir-998 (chr3R:21621998(-))

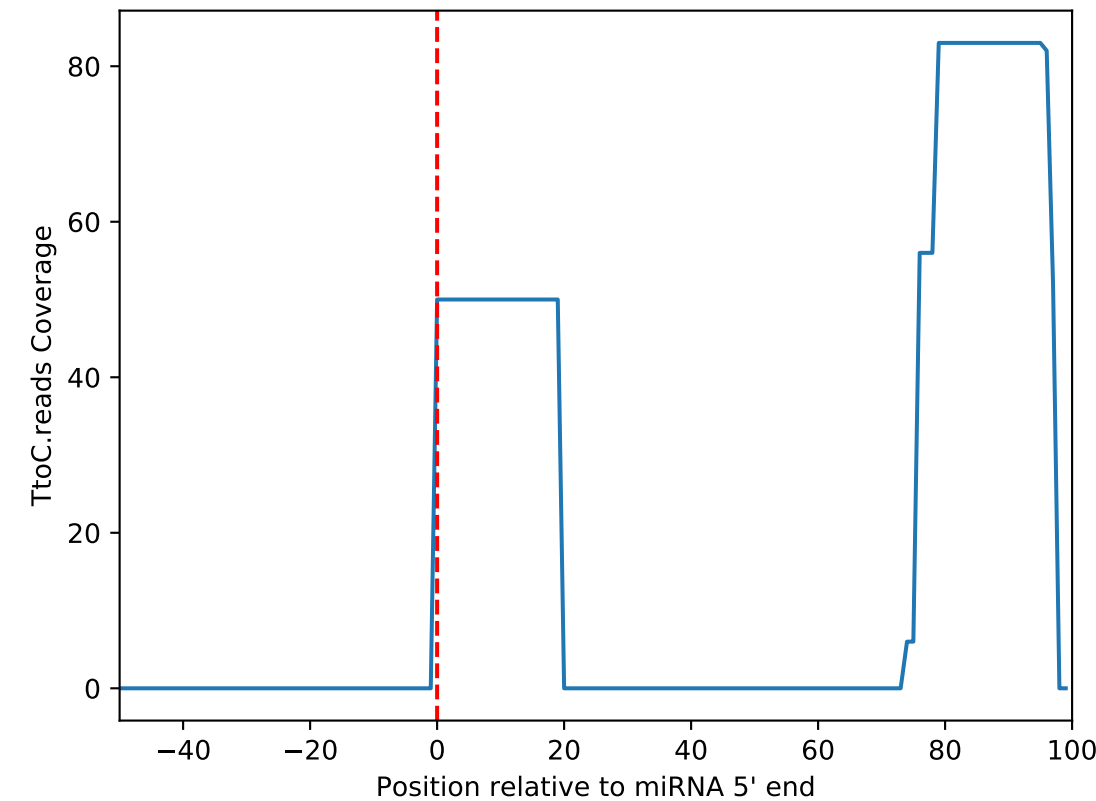

mir-998 (chr3R:21621998(-))

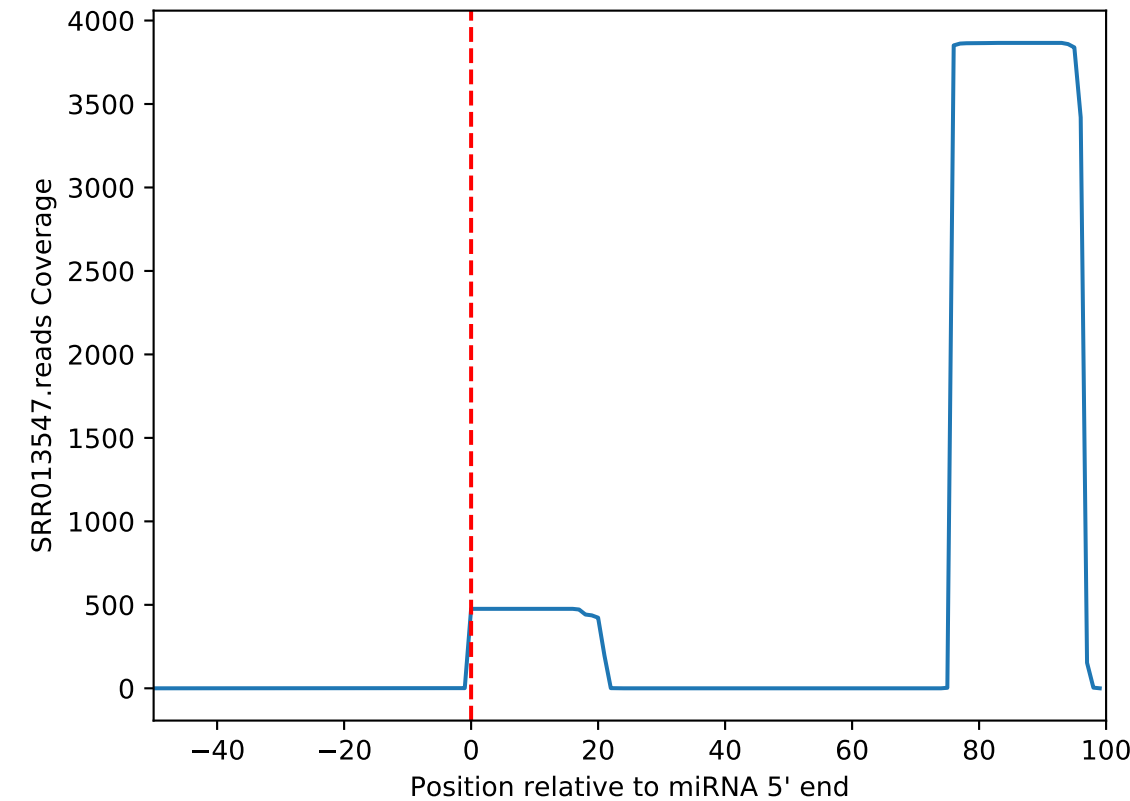

mir-998 (chr3R:21621998(-))

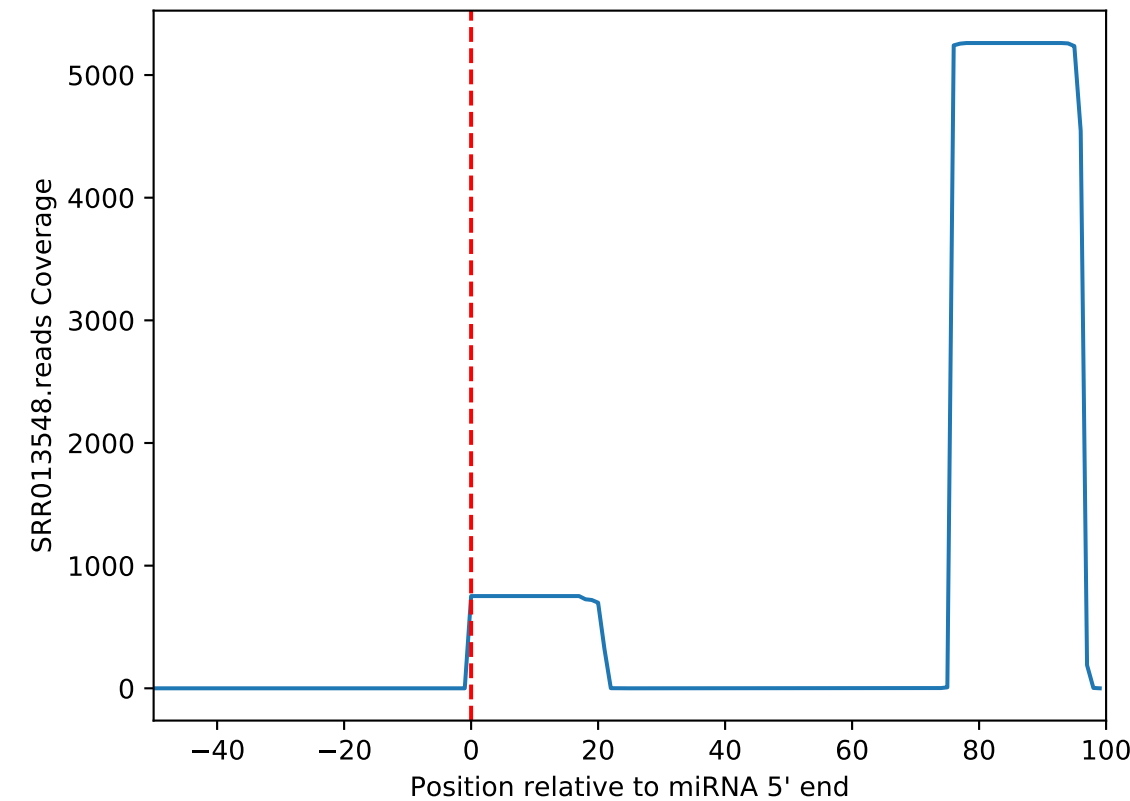

mir-964 (chr2L:5642127(+))

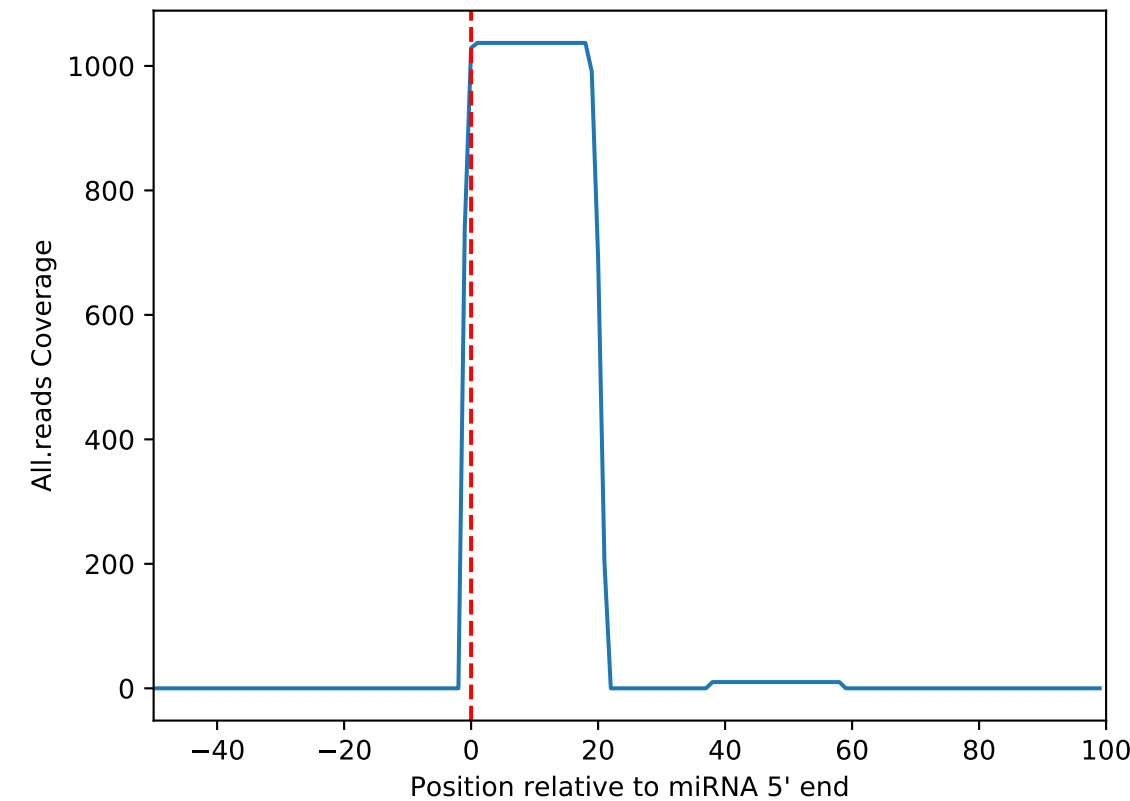

mir-964 (chr2L:5642127(+))

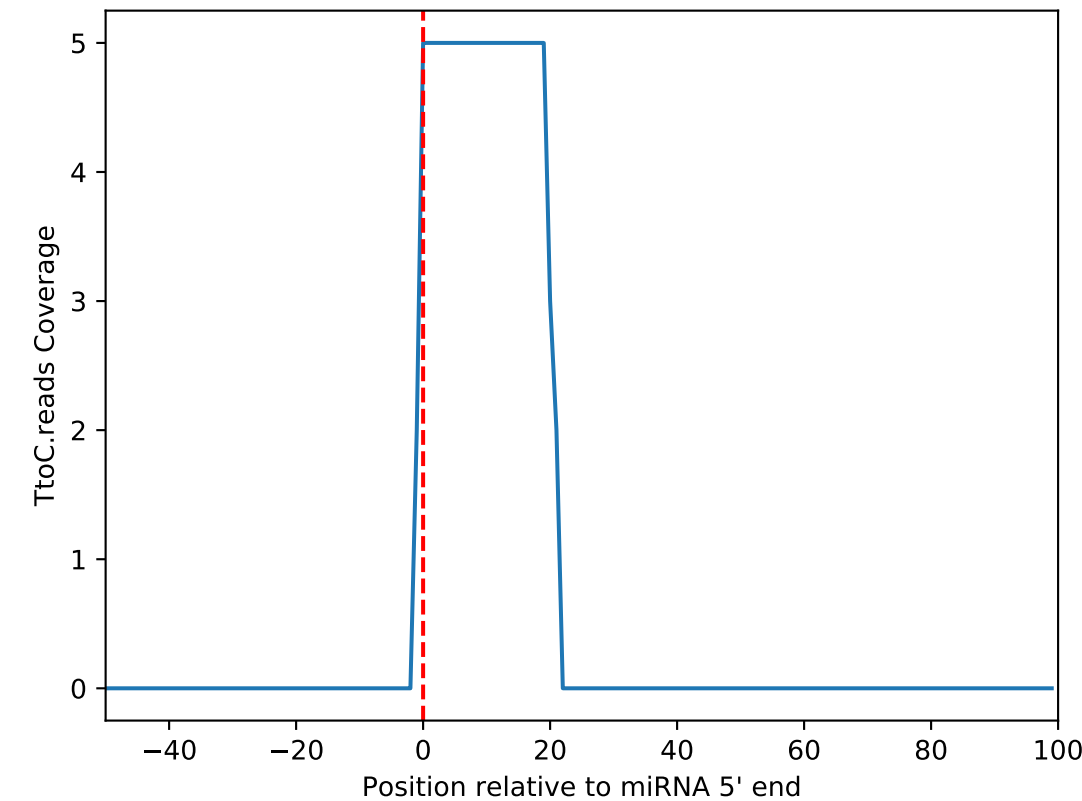

mir-964 (chr2L:5642127(+))



mir-964 (chr2L:5642127(+))



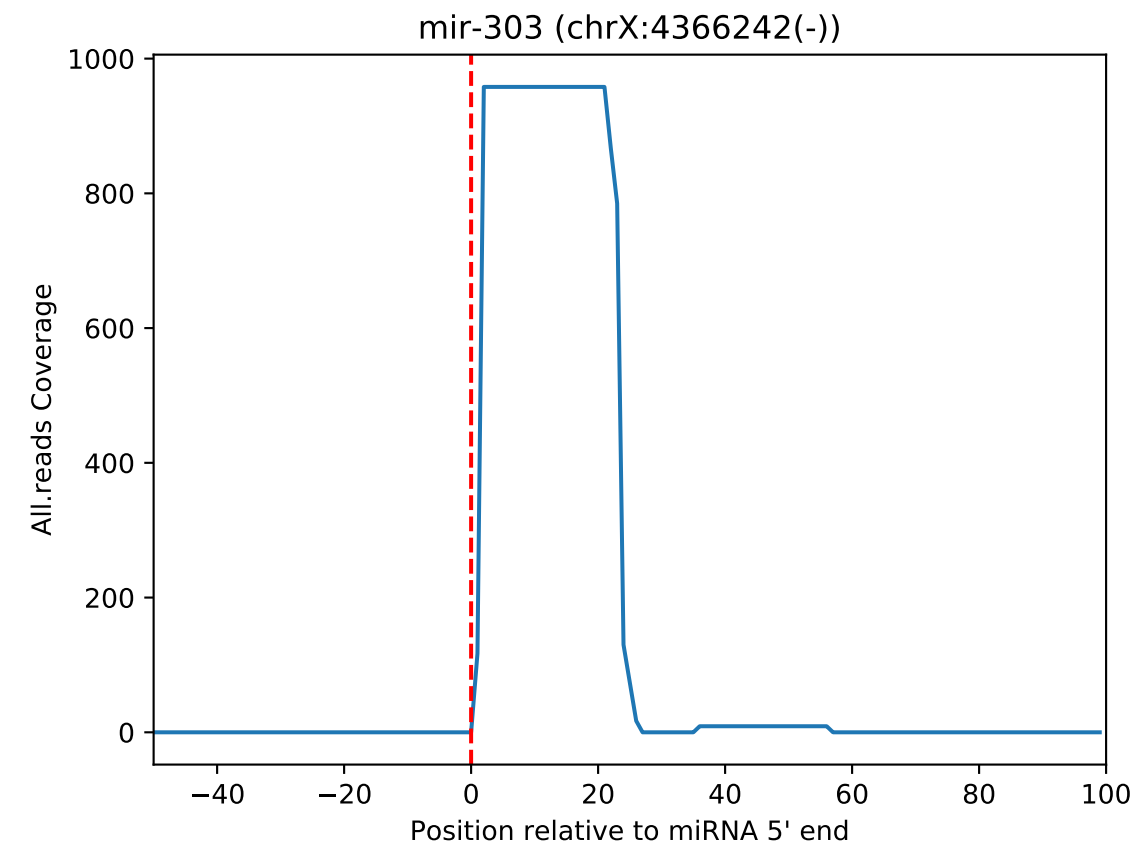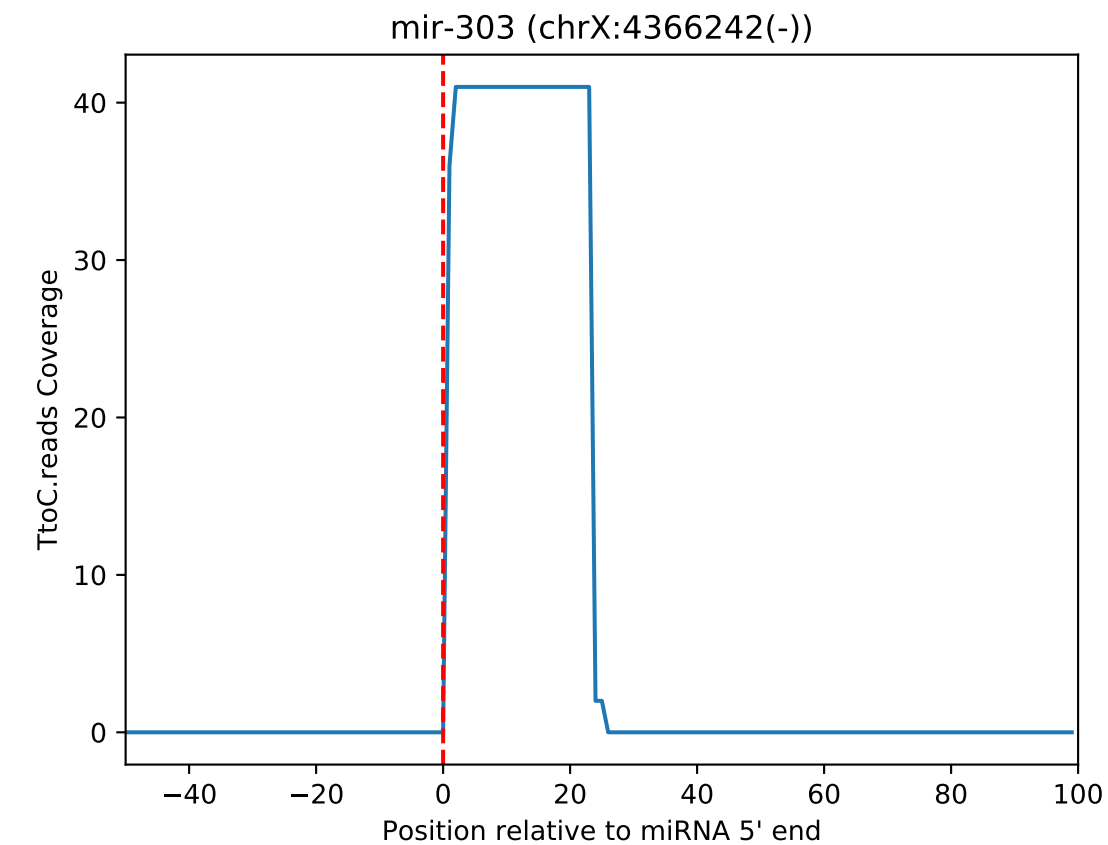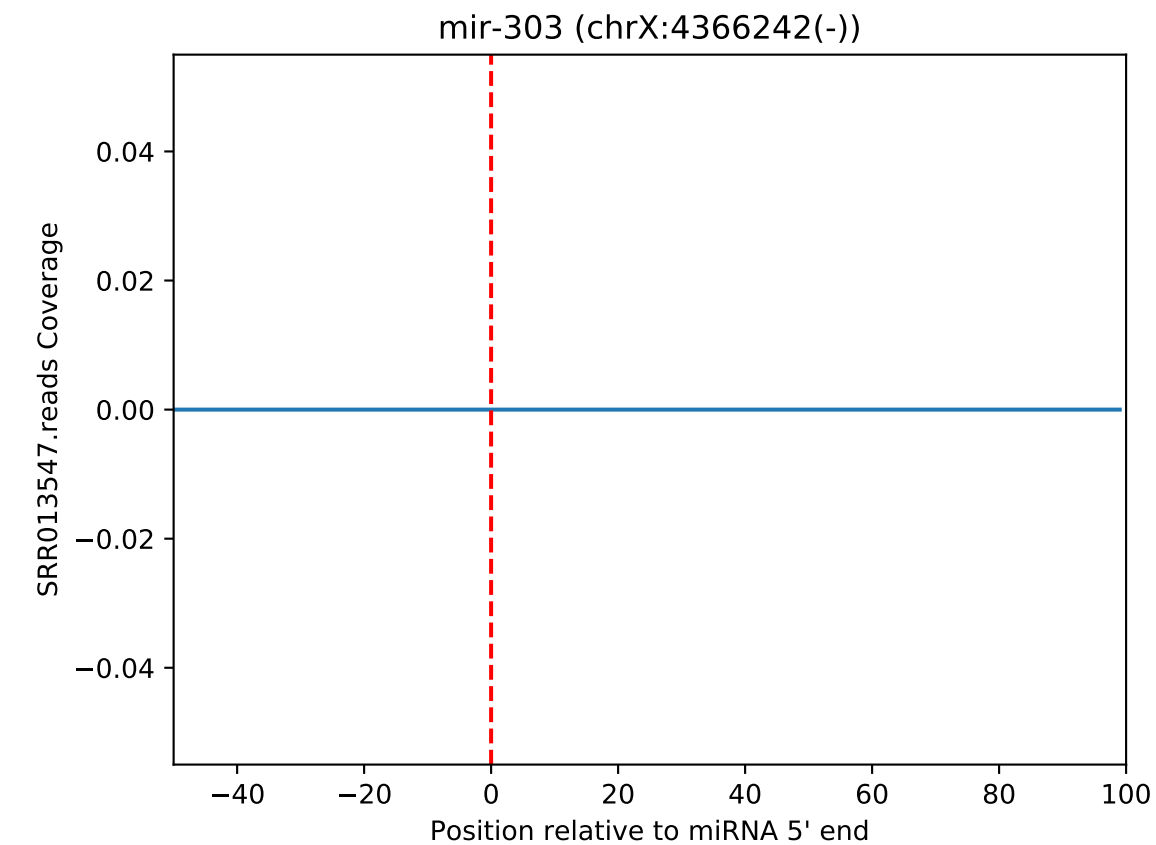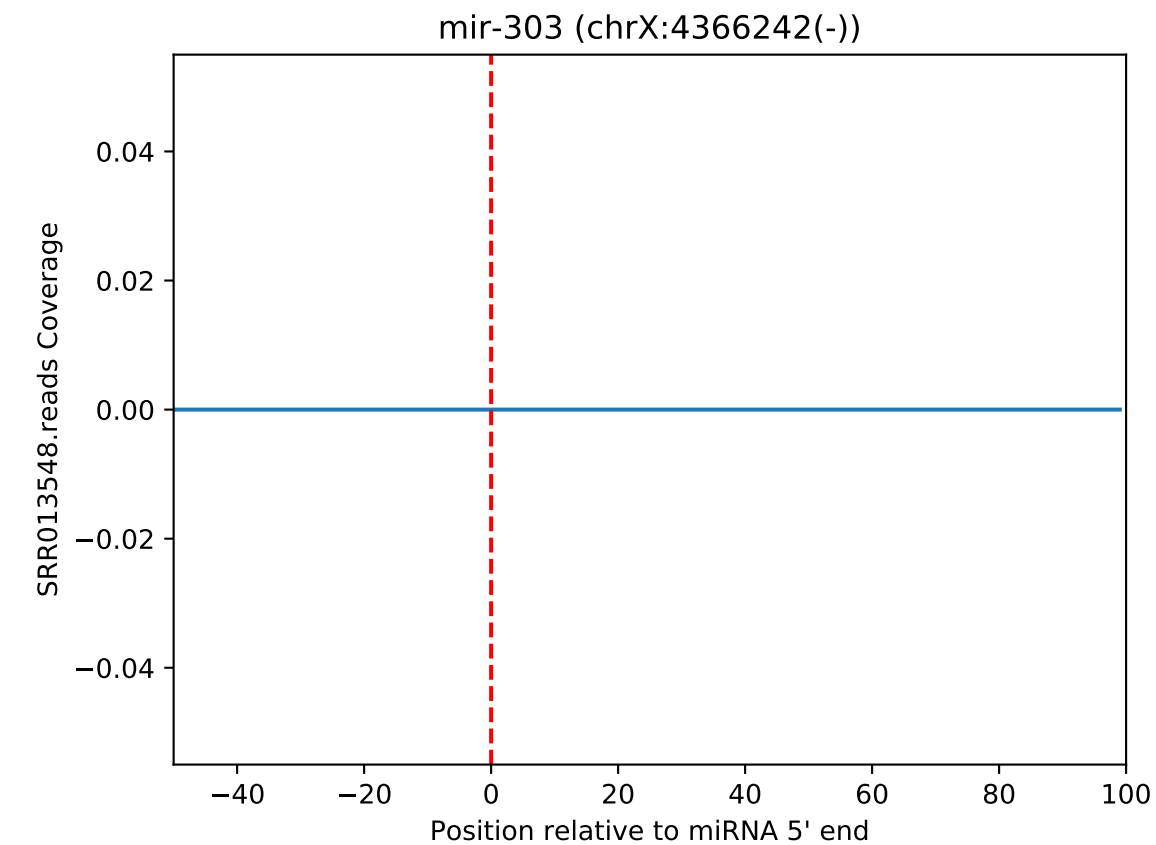

mir-999 (chr3R:21798308(-))

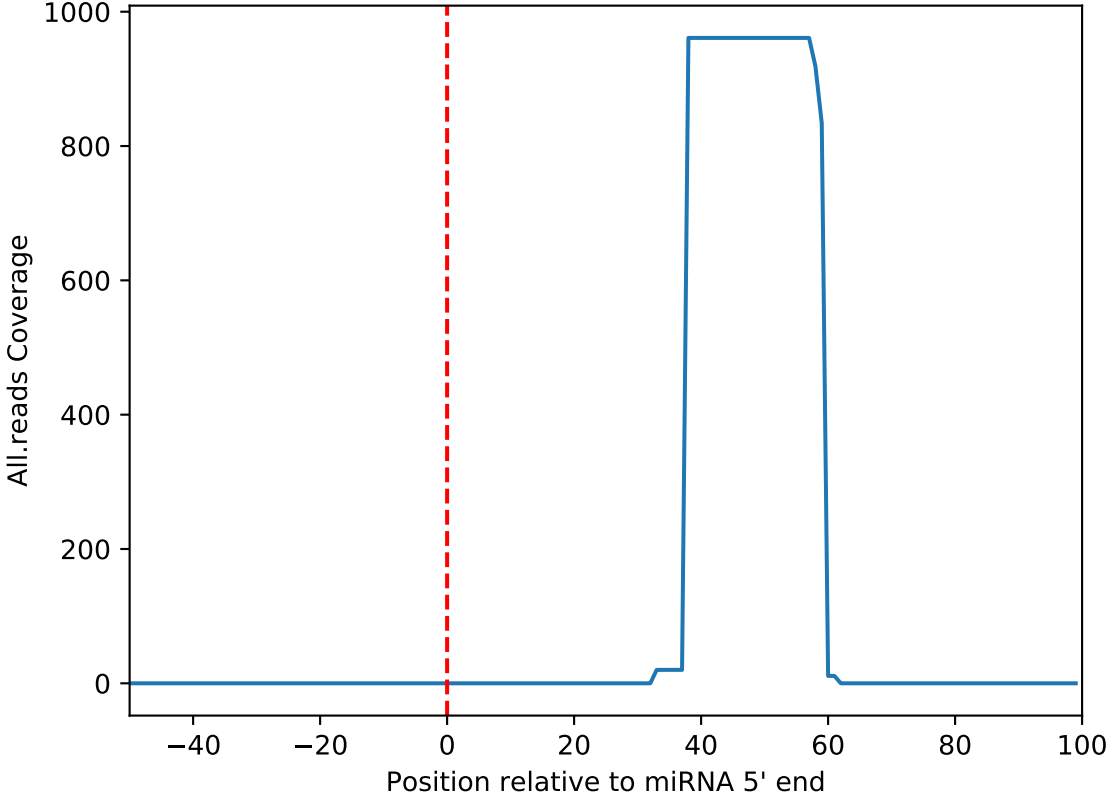

mir-999 (chr3R:21798308(-))

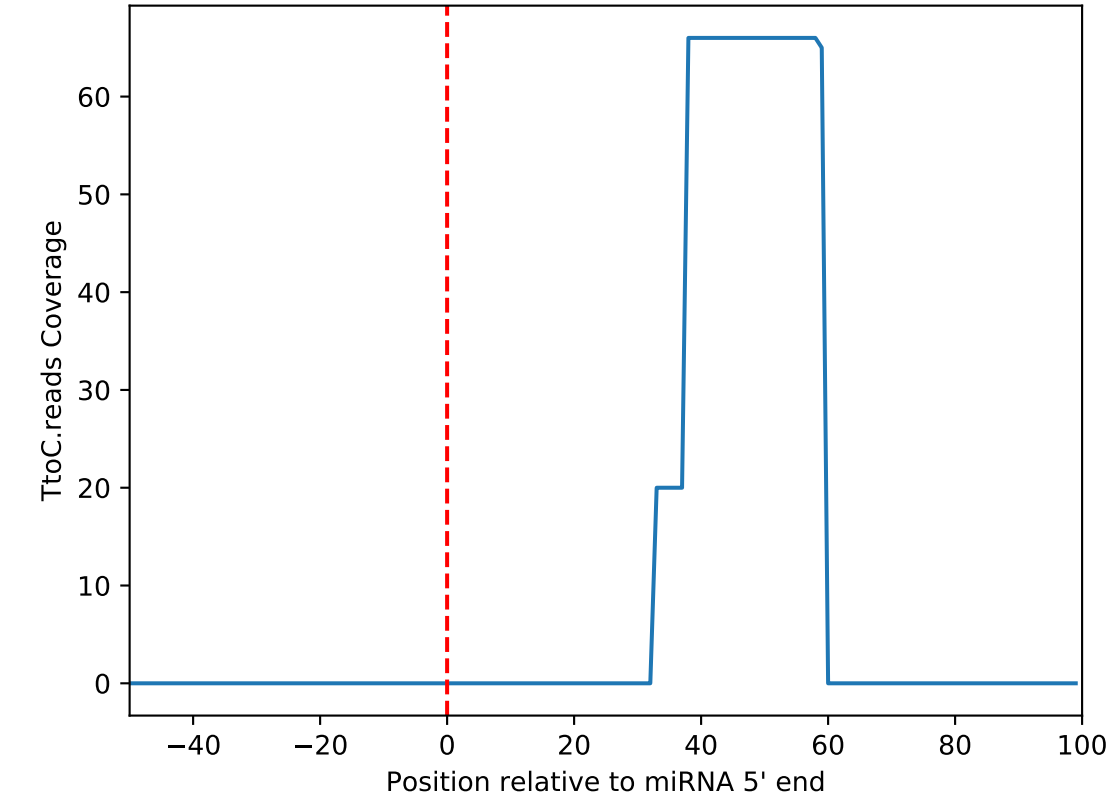

mir-999 (chr3R:21798308(-))

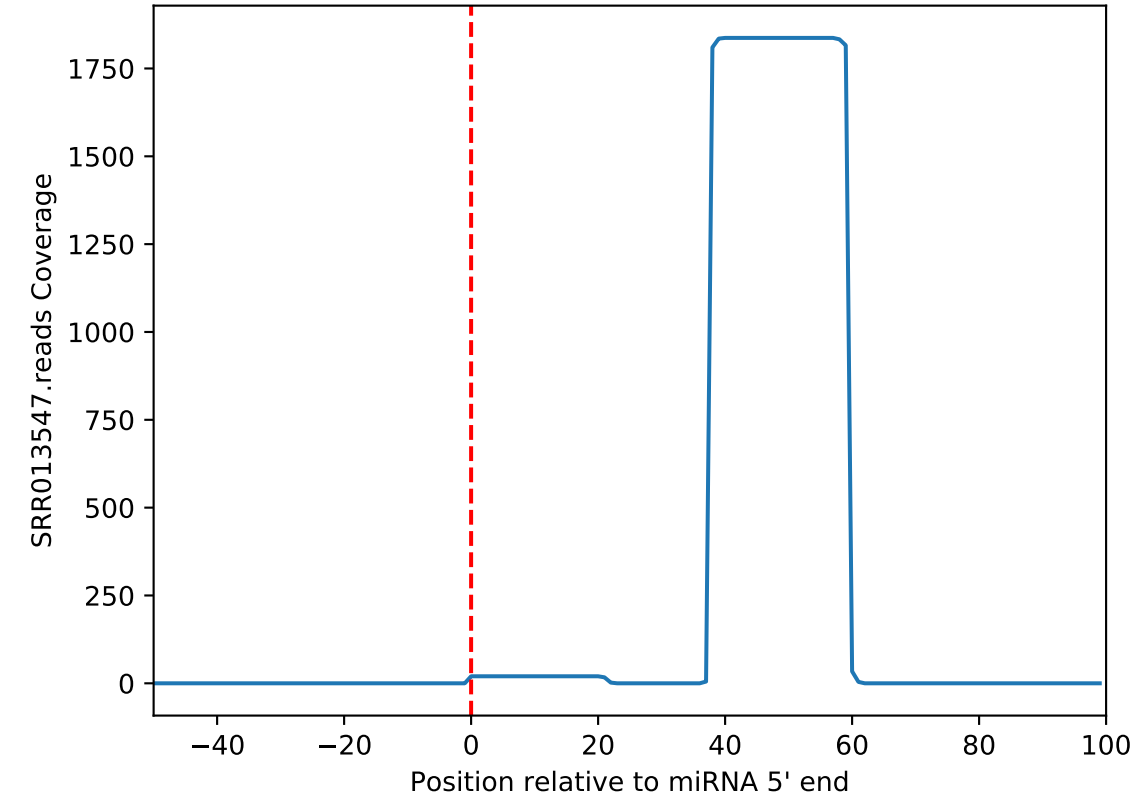

mir-999 (chr3R:21798308(-))

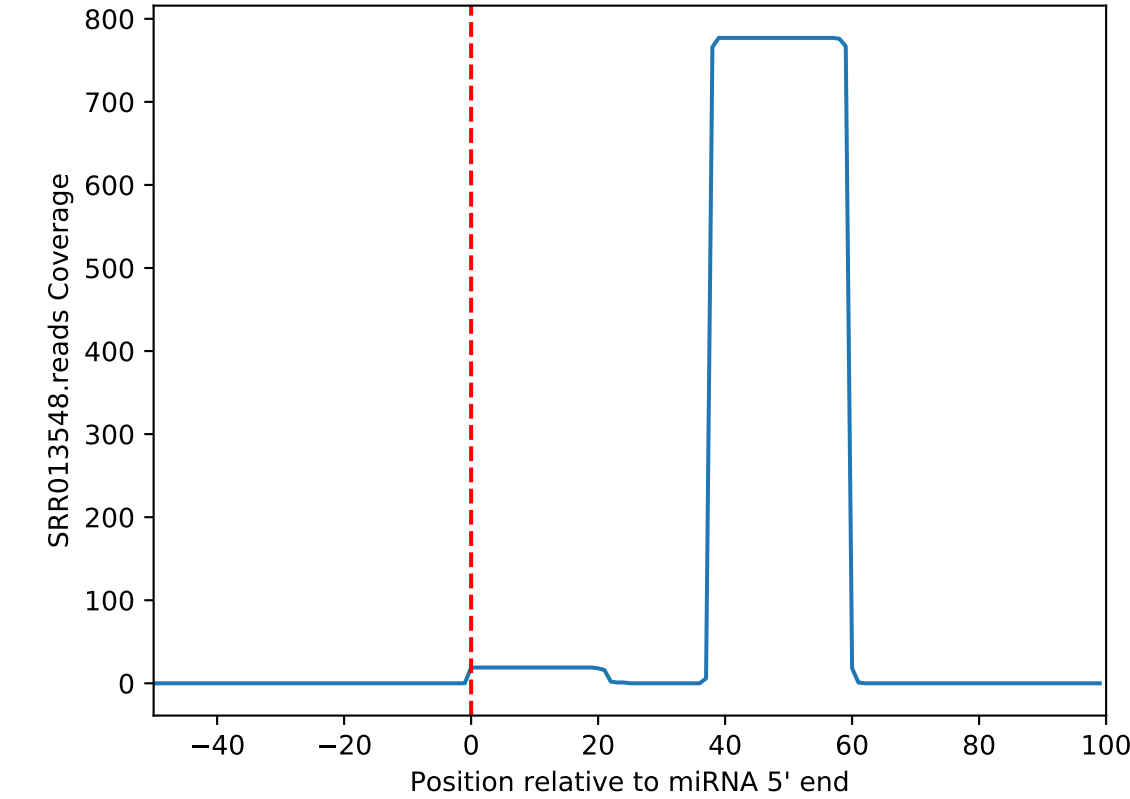



mir-33 (chr3L:19797986(+))

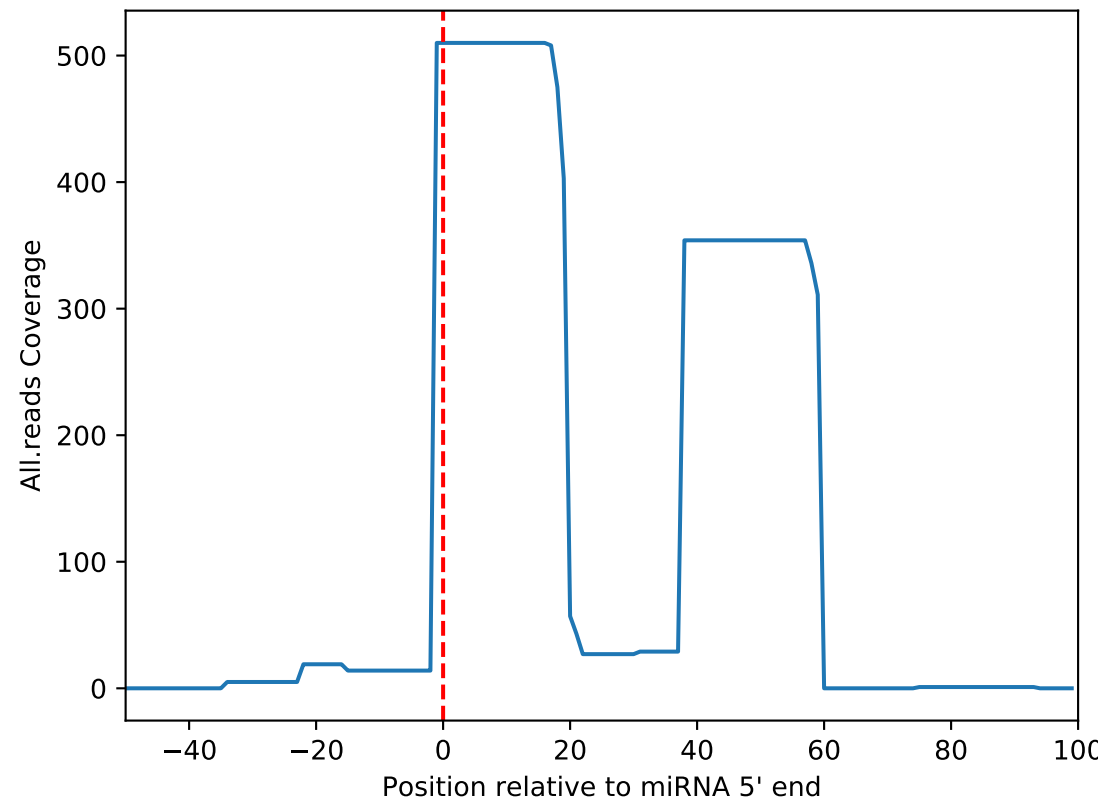

mir-33 (chr3L:19797986(+))

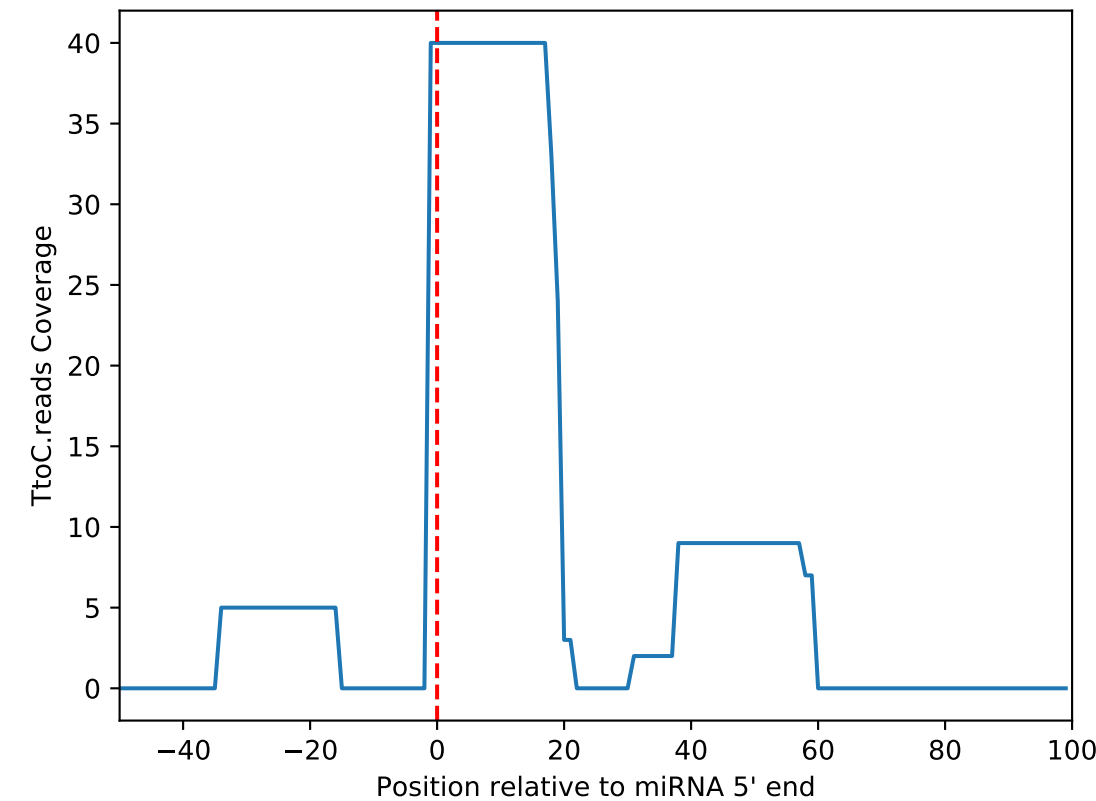

mir-33 (chr3L:19797986(+))

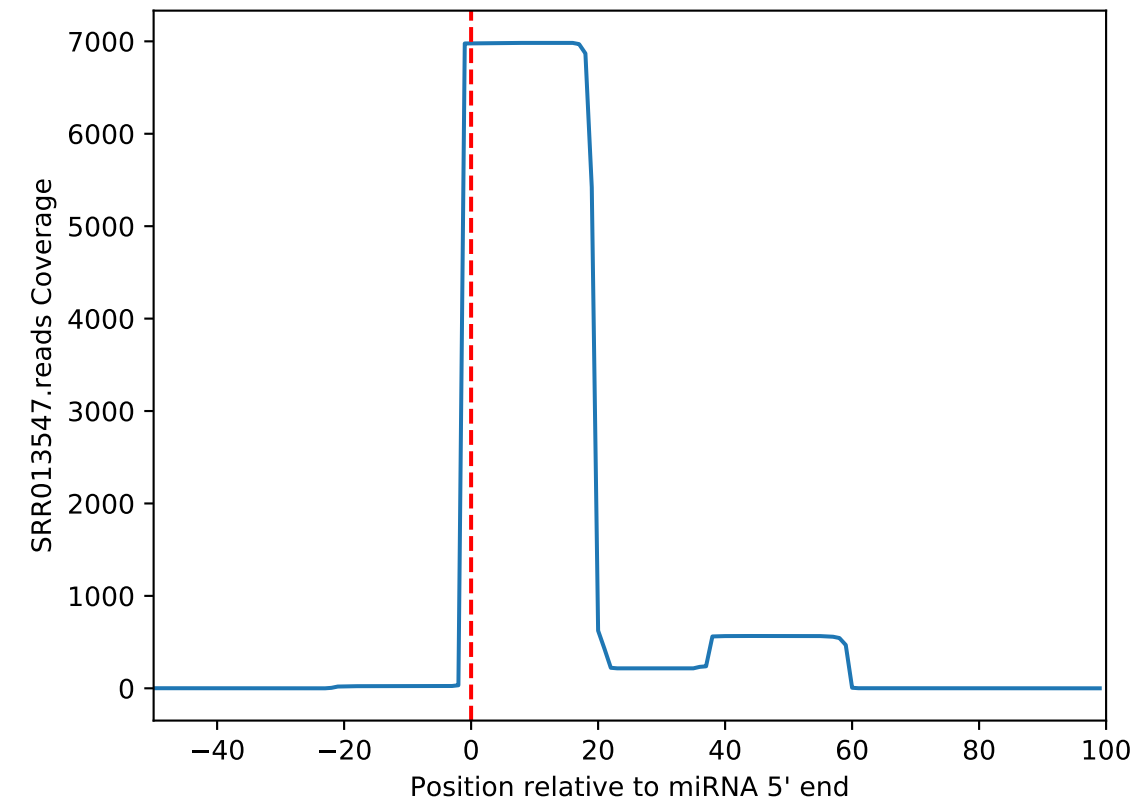

mir-33 (chr3L:19797986(+))

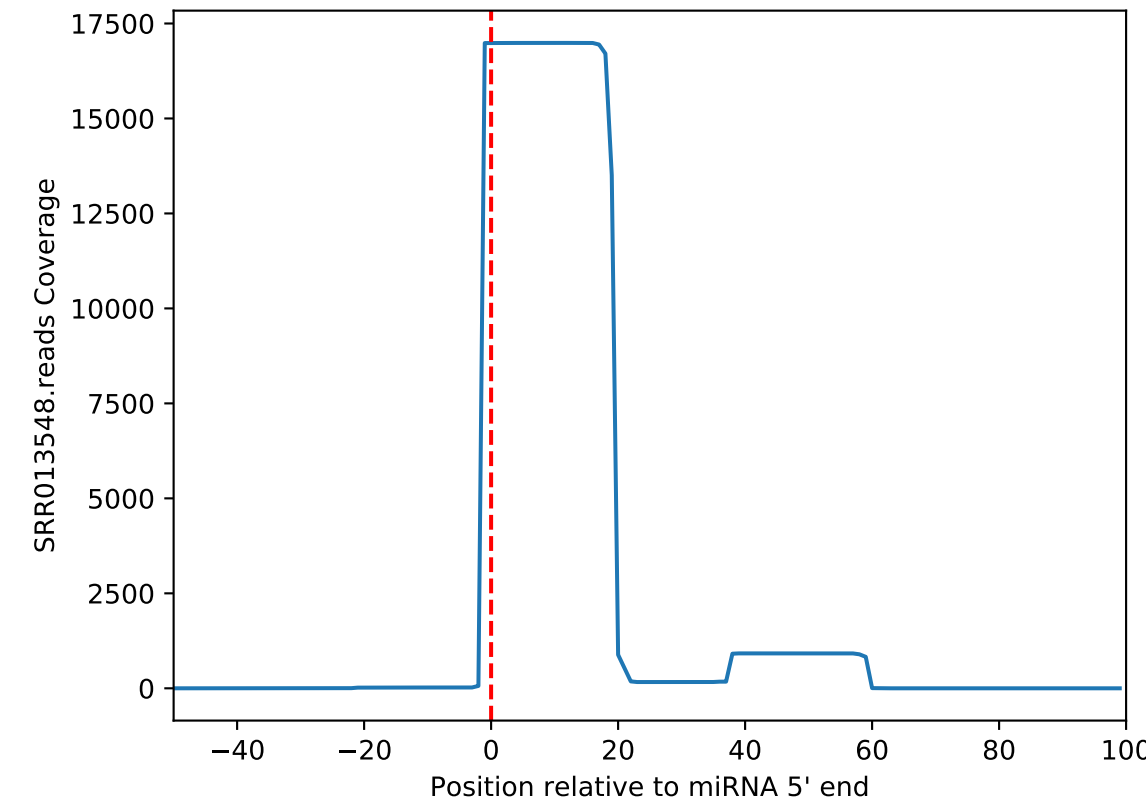

mir-276b (chr3L:10319807(+))

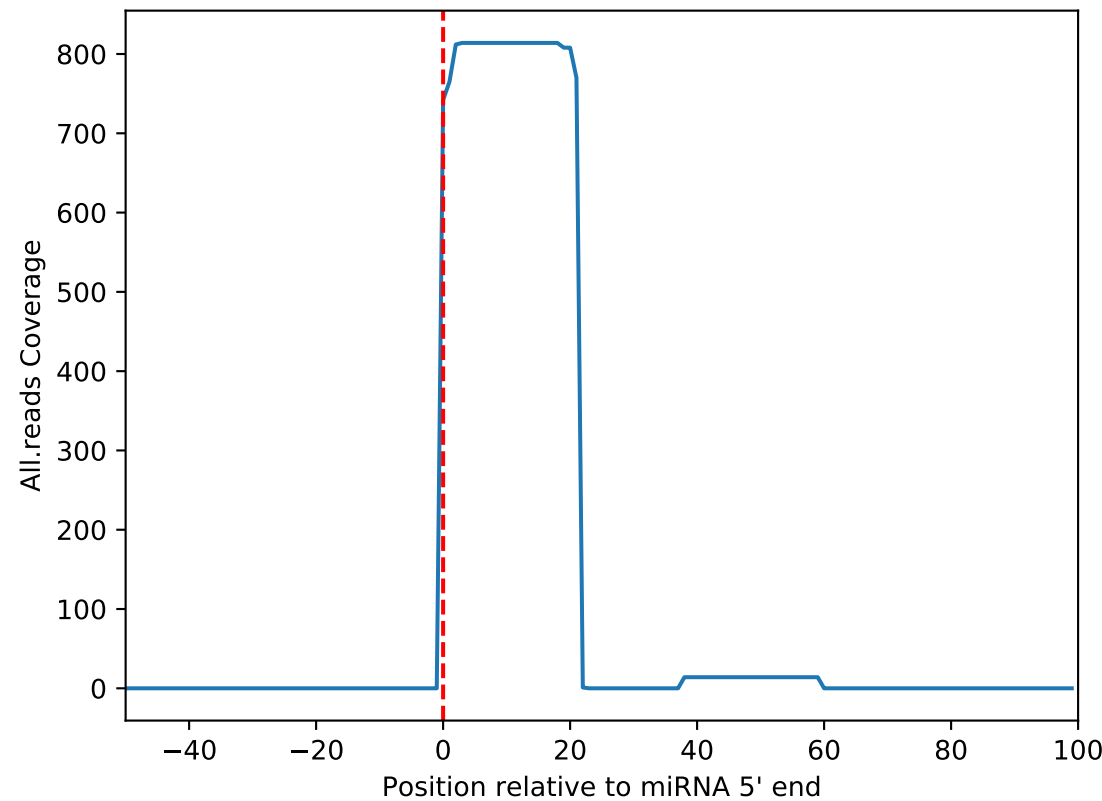

mir-276b (chr3L:10319807(+))



mir-276b (chr3L:10319807(+))

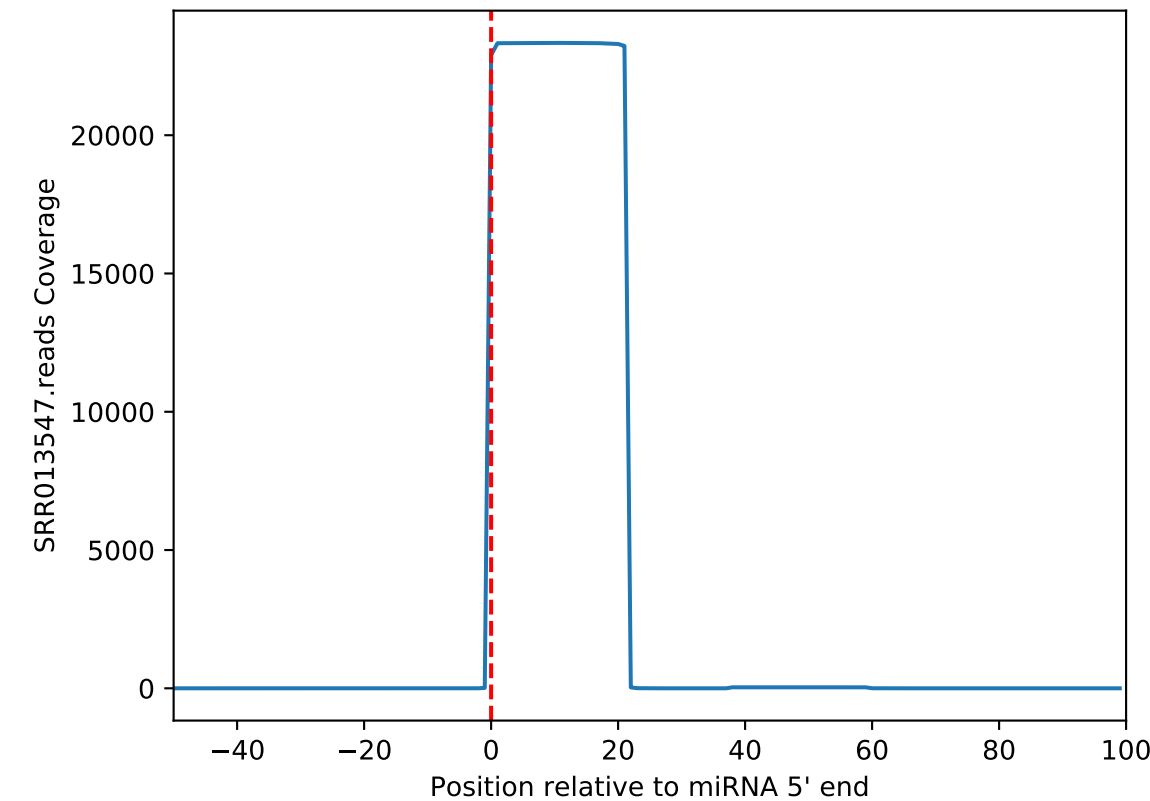

mir-276b (chr3L:10319807(+))

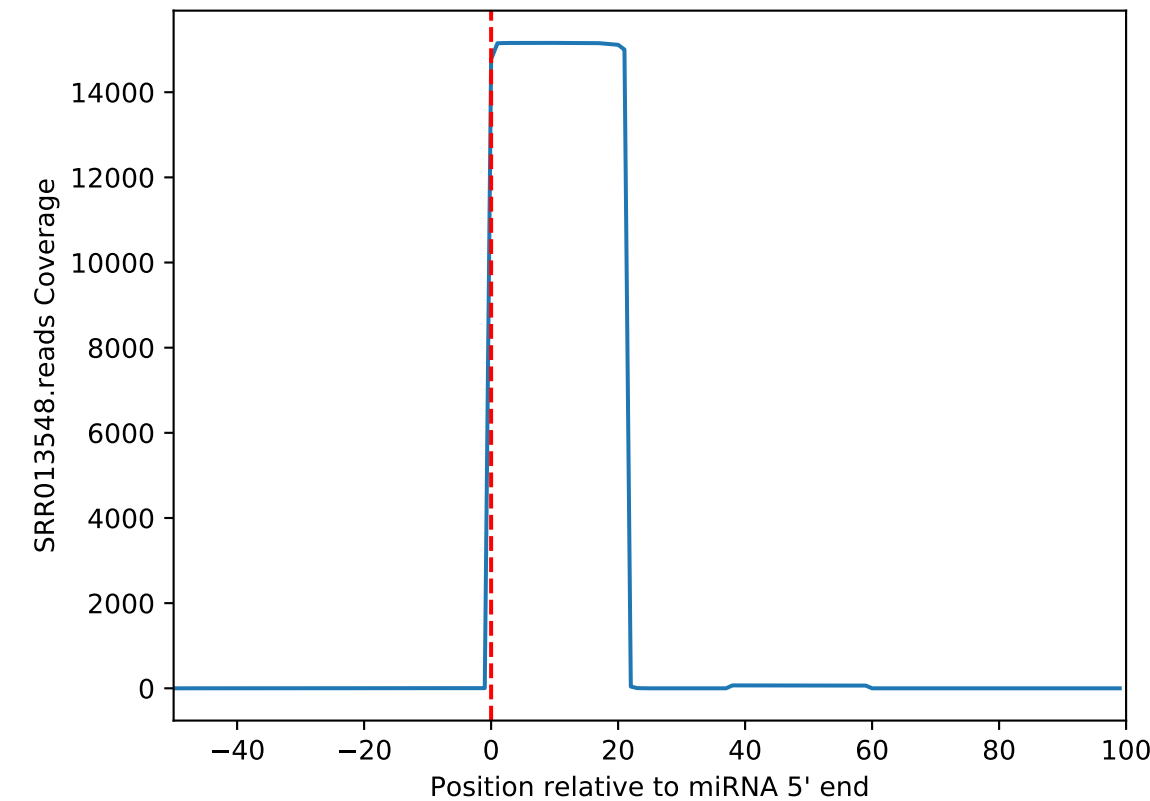

mir-375 (chr2L:857556(+))

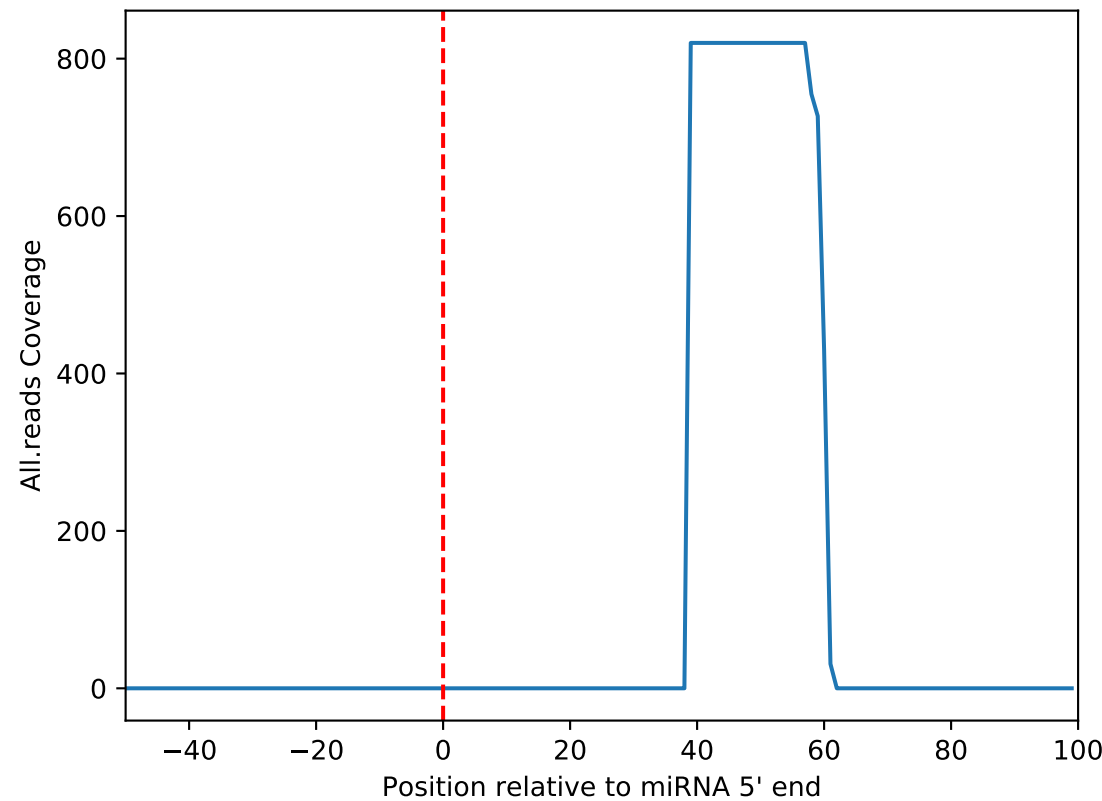

mir-375 (chr2L:857556(+))

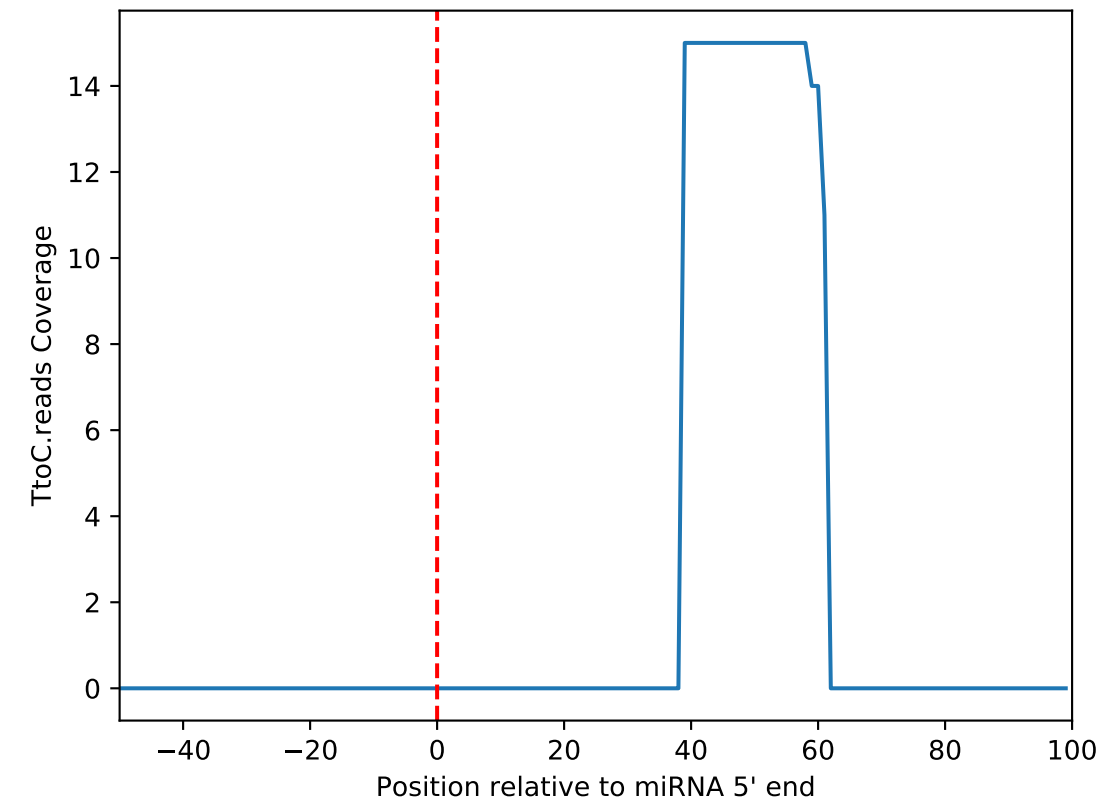

mir-375 (chr2L:857556(+))



mir-375 (chr2L:857556(+))

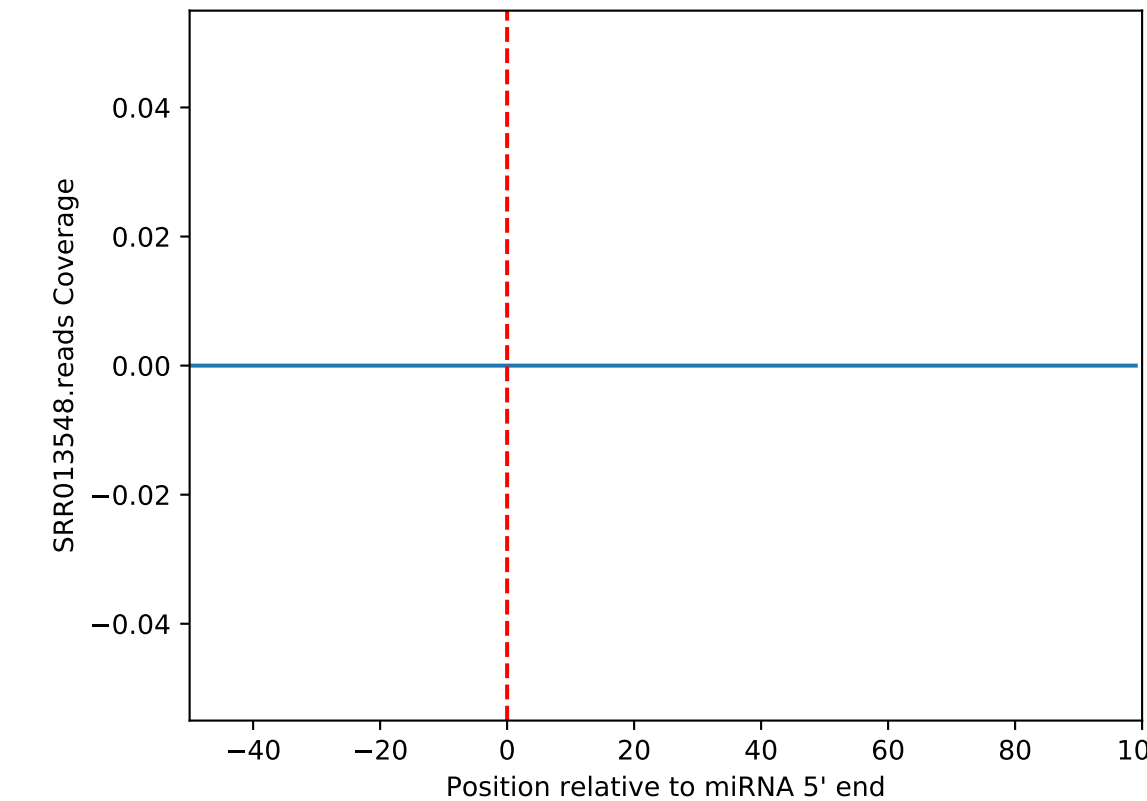

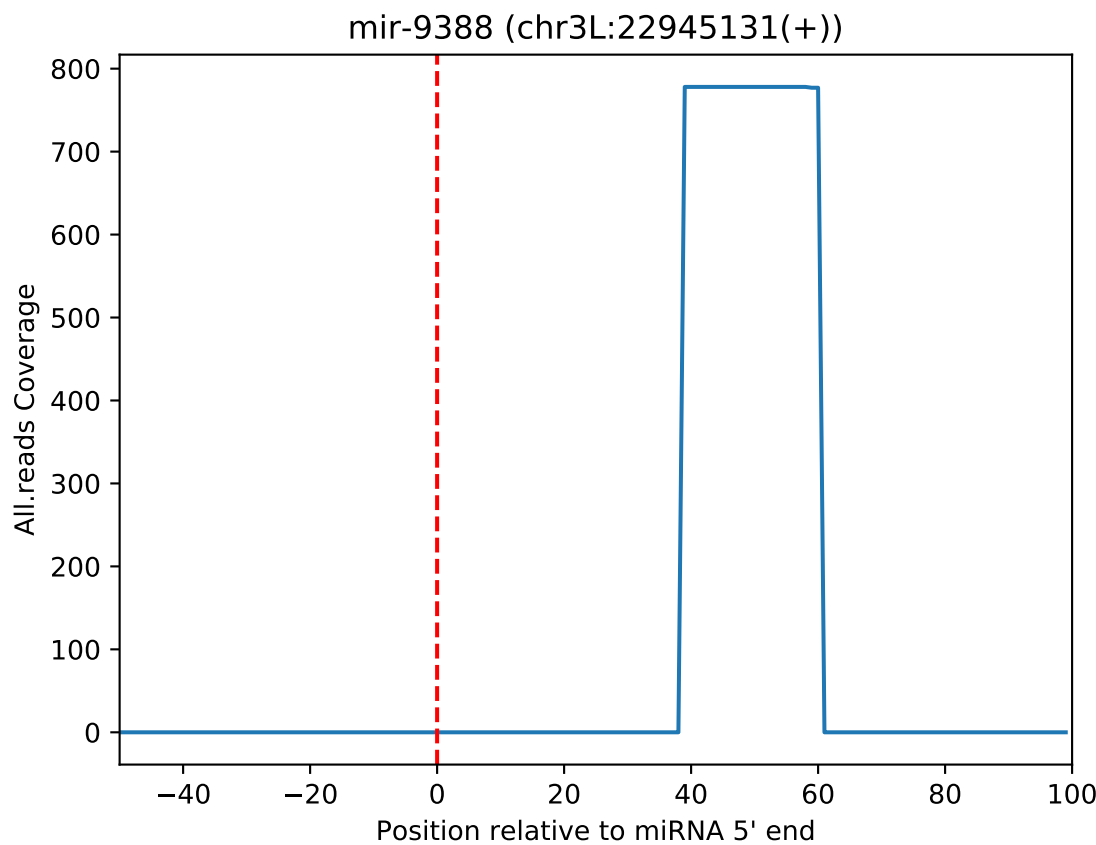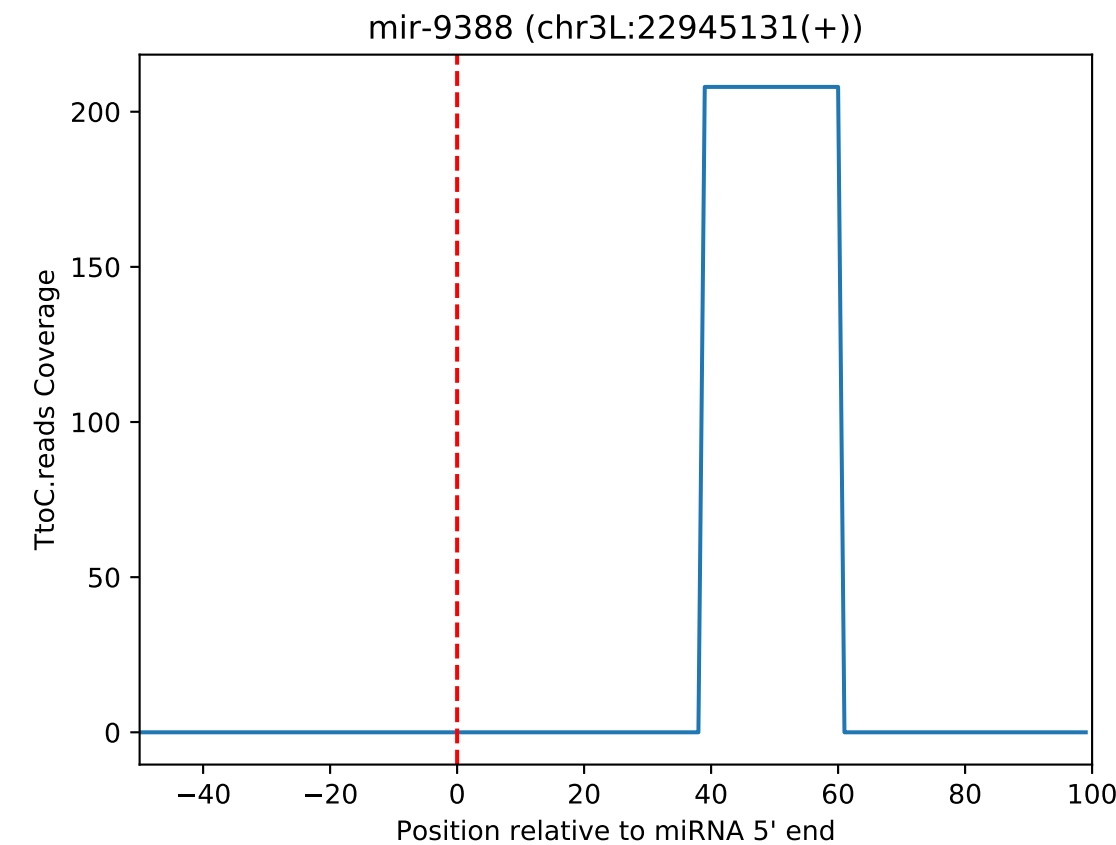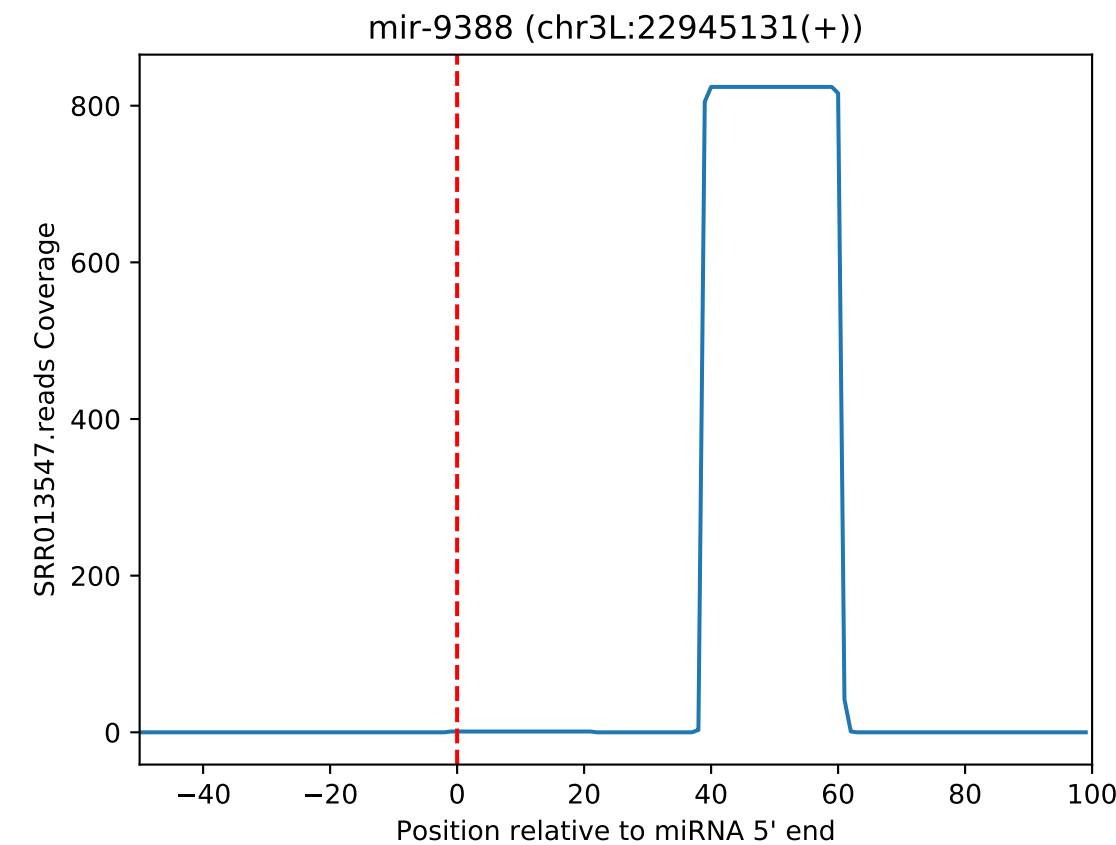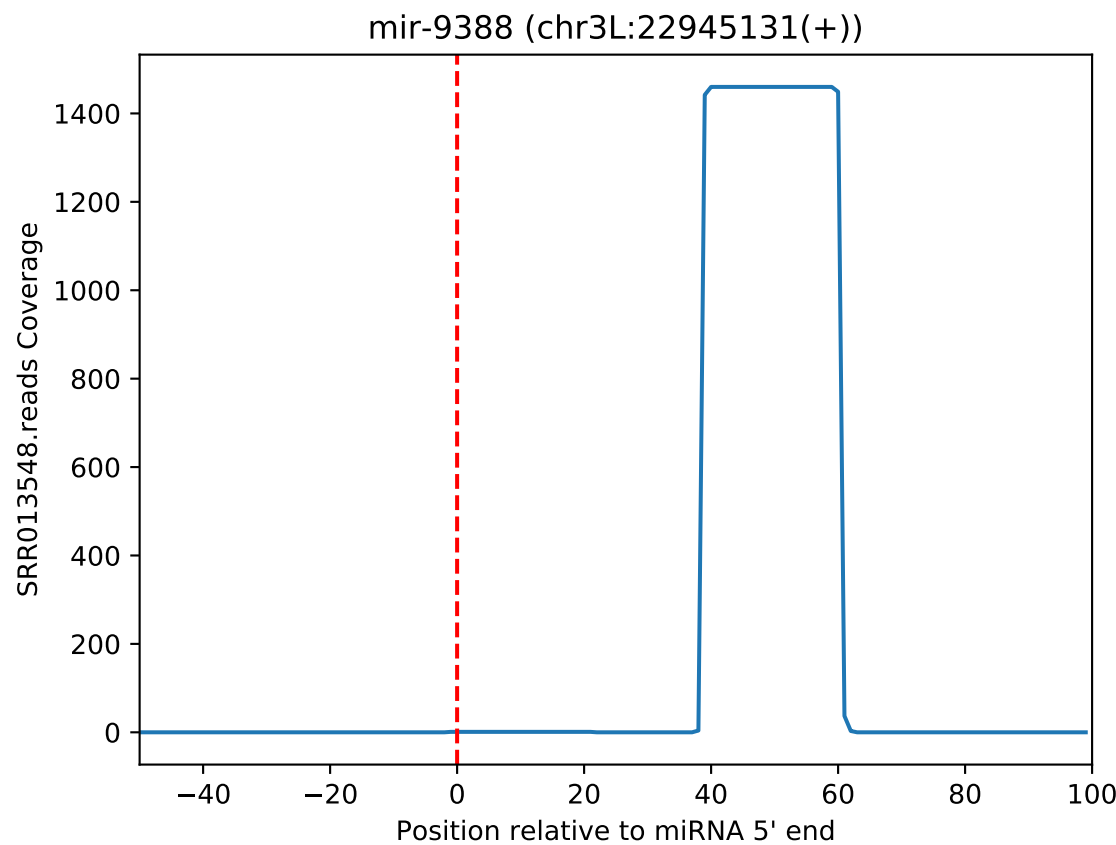

mir-982 (chrX:4365883(-))

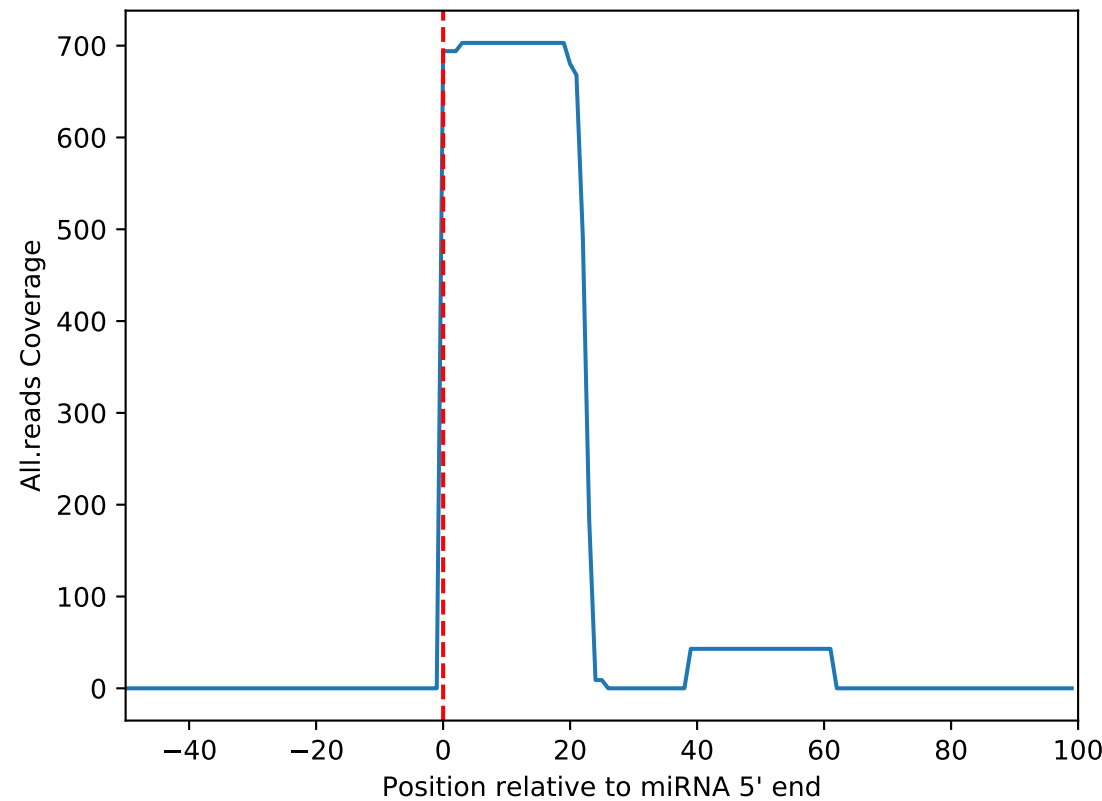

mir-982 (chrX:4365883(-))

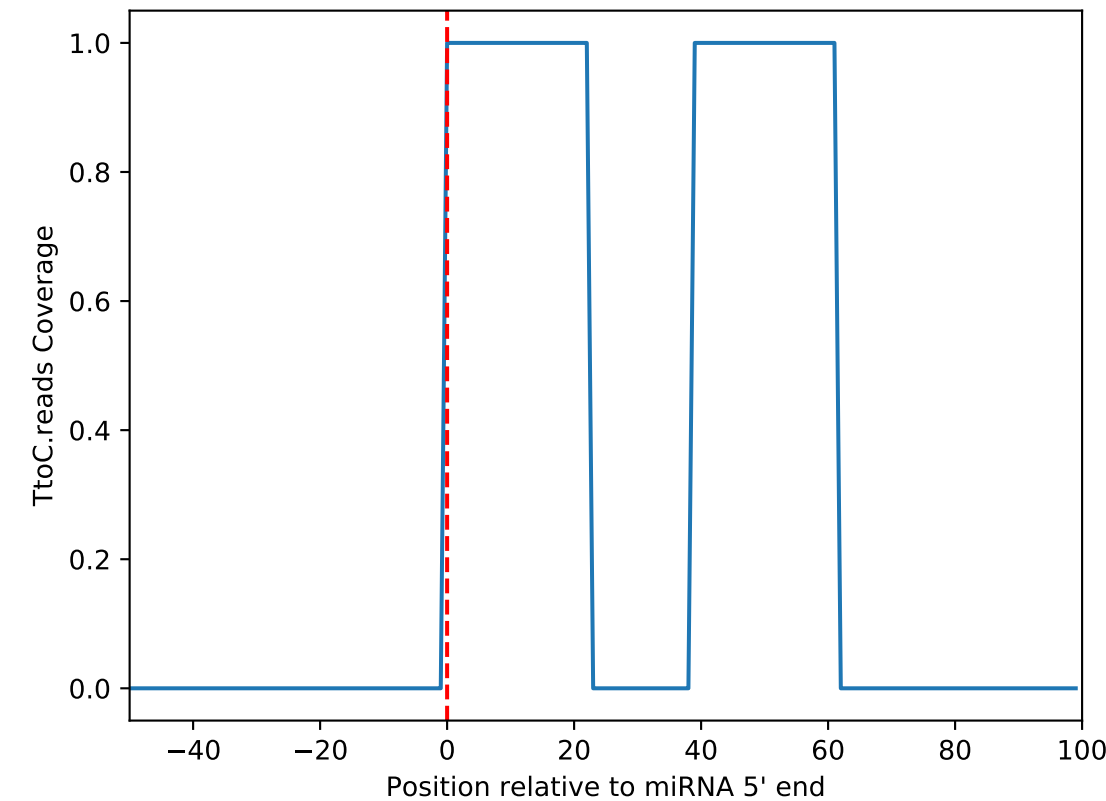

mir-982 (chrX:4365883(-))



mir-982 (chrX:4365883(-))

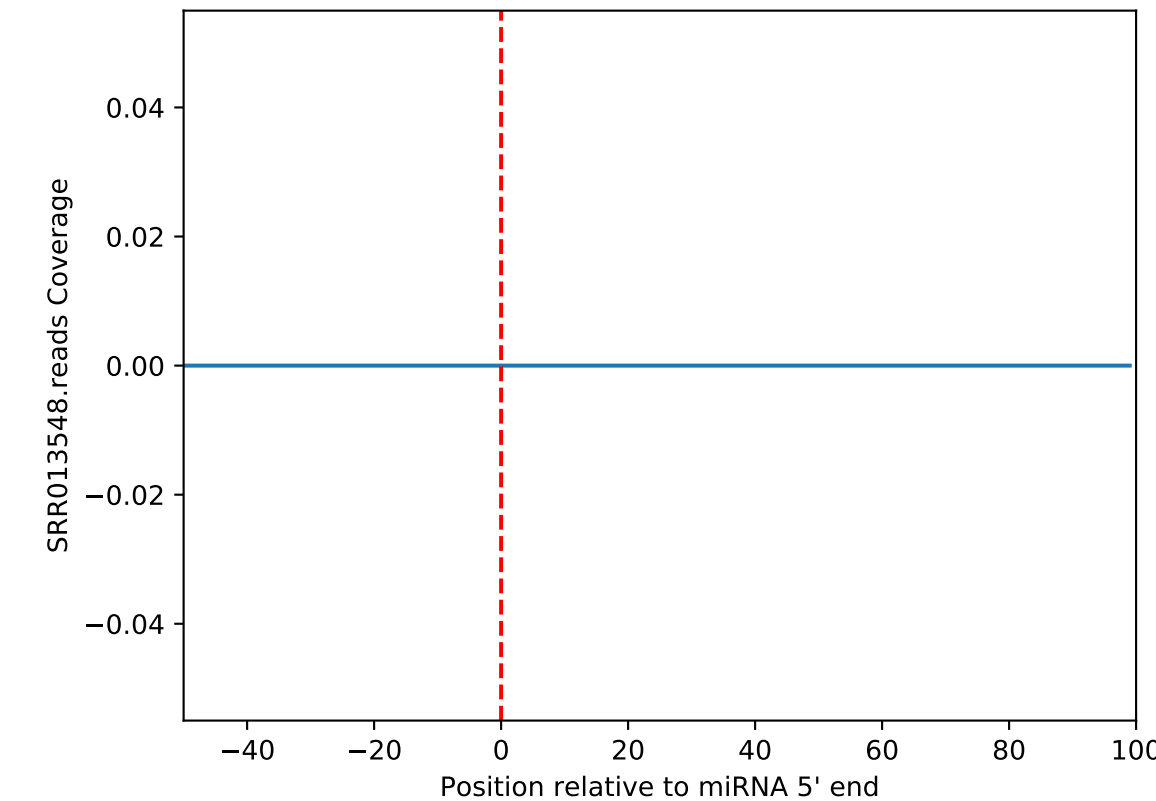

mir-252 (chr3R:13464296(-))

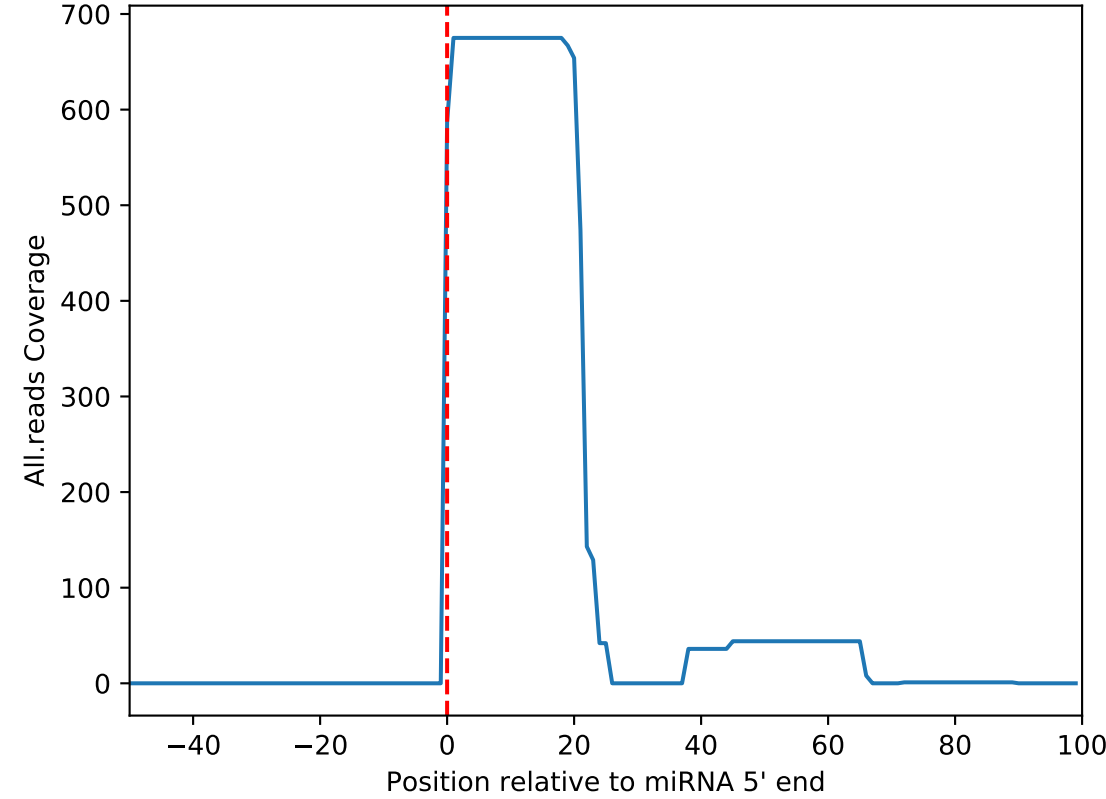

mir-252 (chr3R:13464296(-))

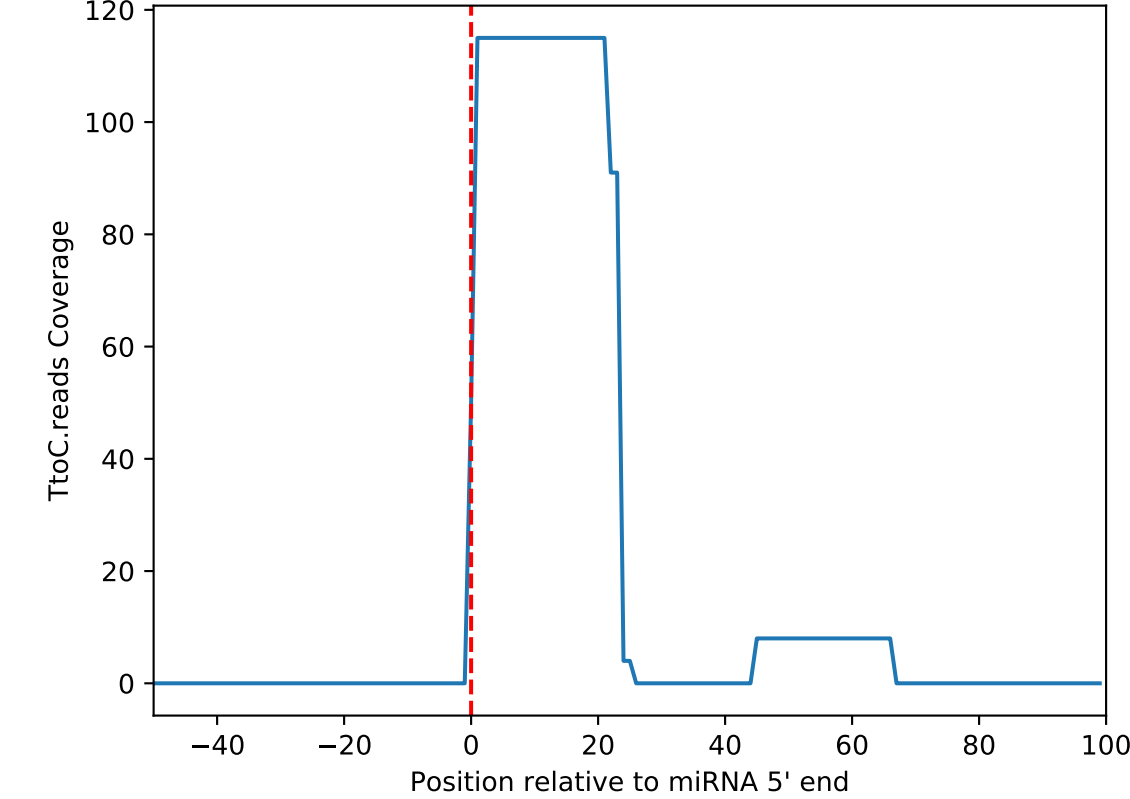

mir-252 (chr3R:13464296(-))

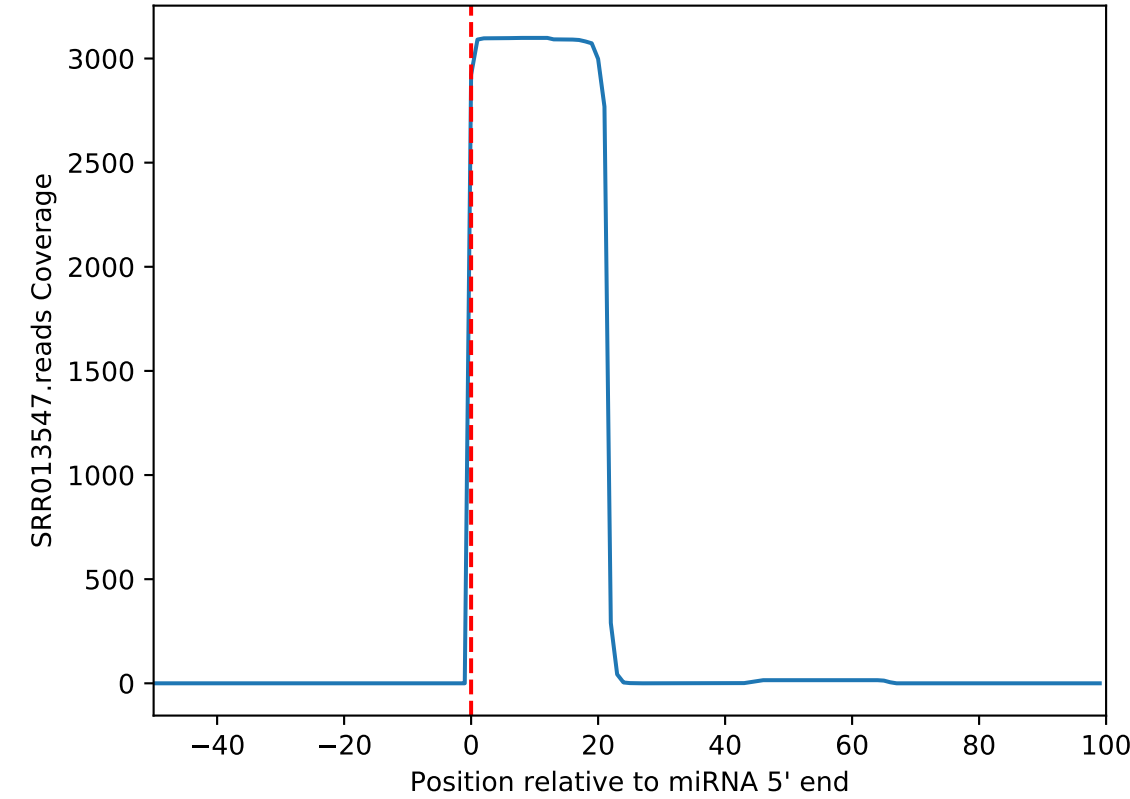

mir-252 (chr3R:13464296(-))

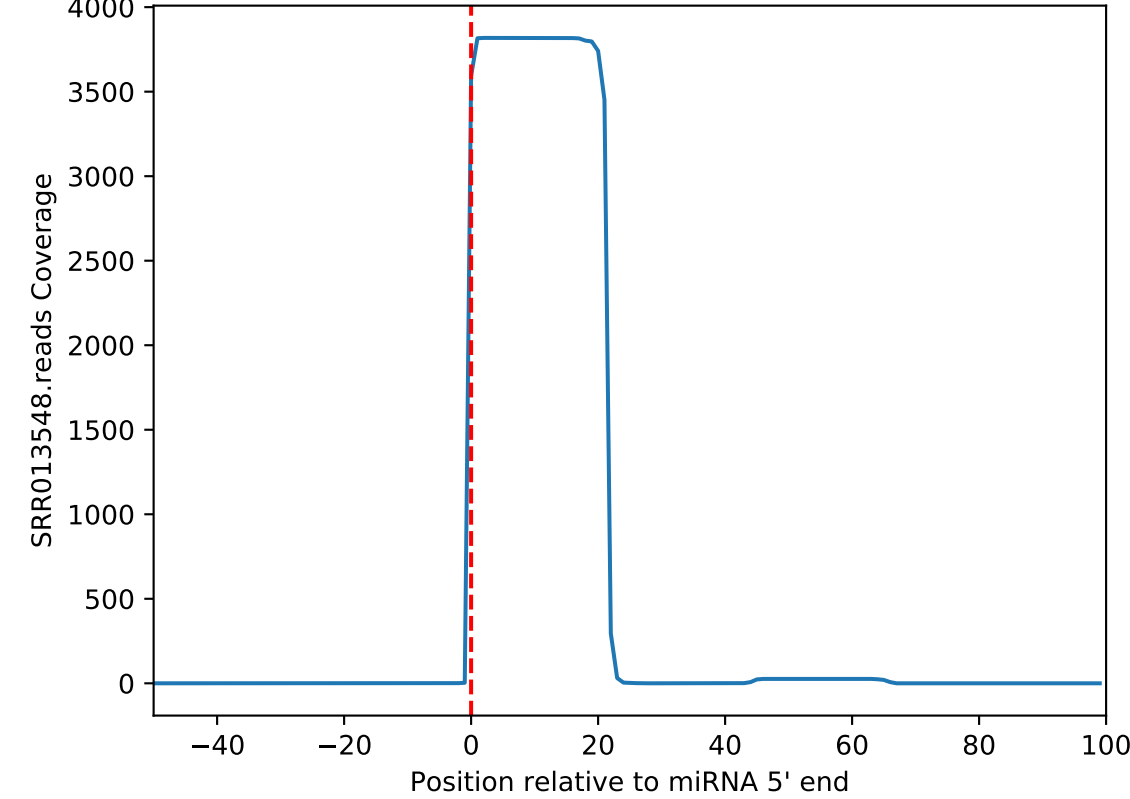

mir-995 (chr3R:20735939(+))

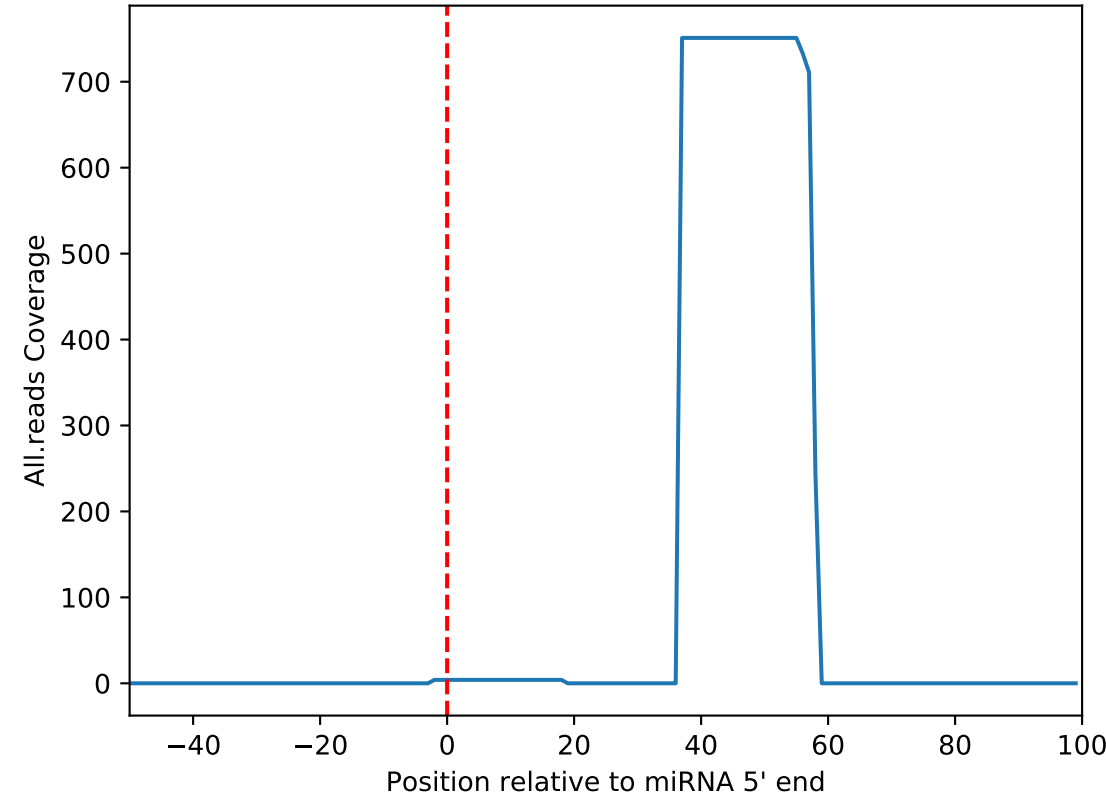

mir-995 (chr3R:20735939(+))

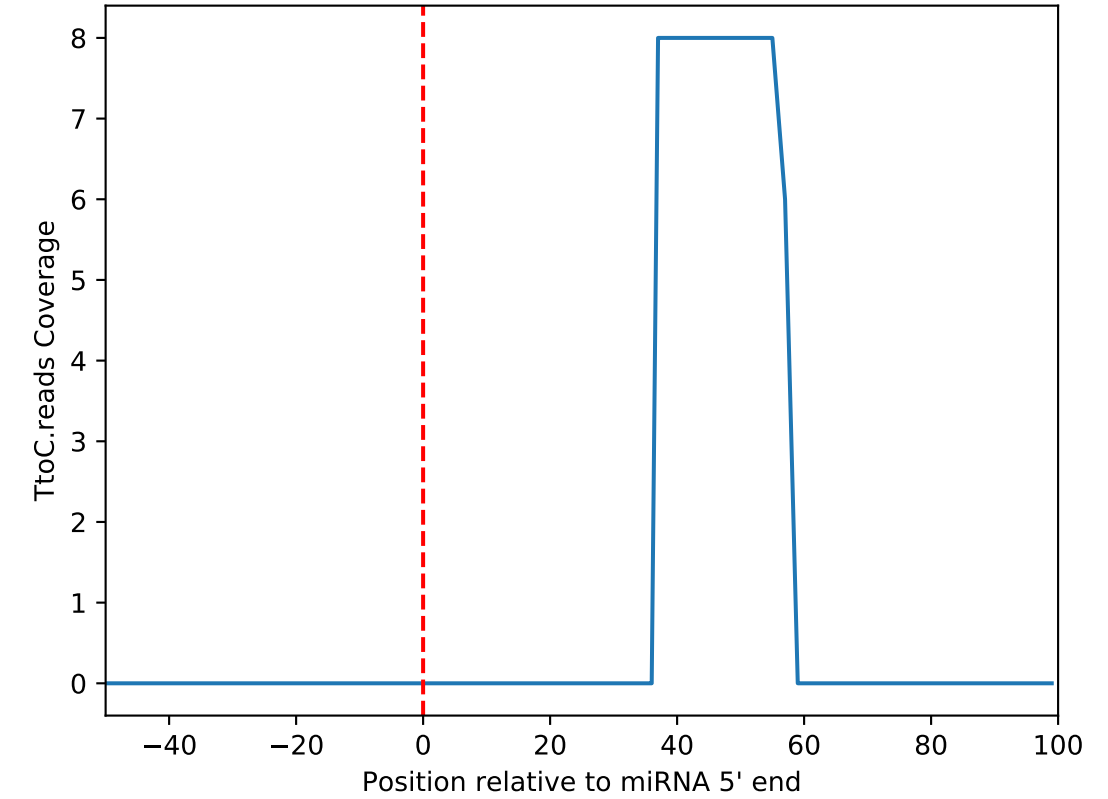

mir-995 (chr3R:20735939(+))

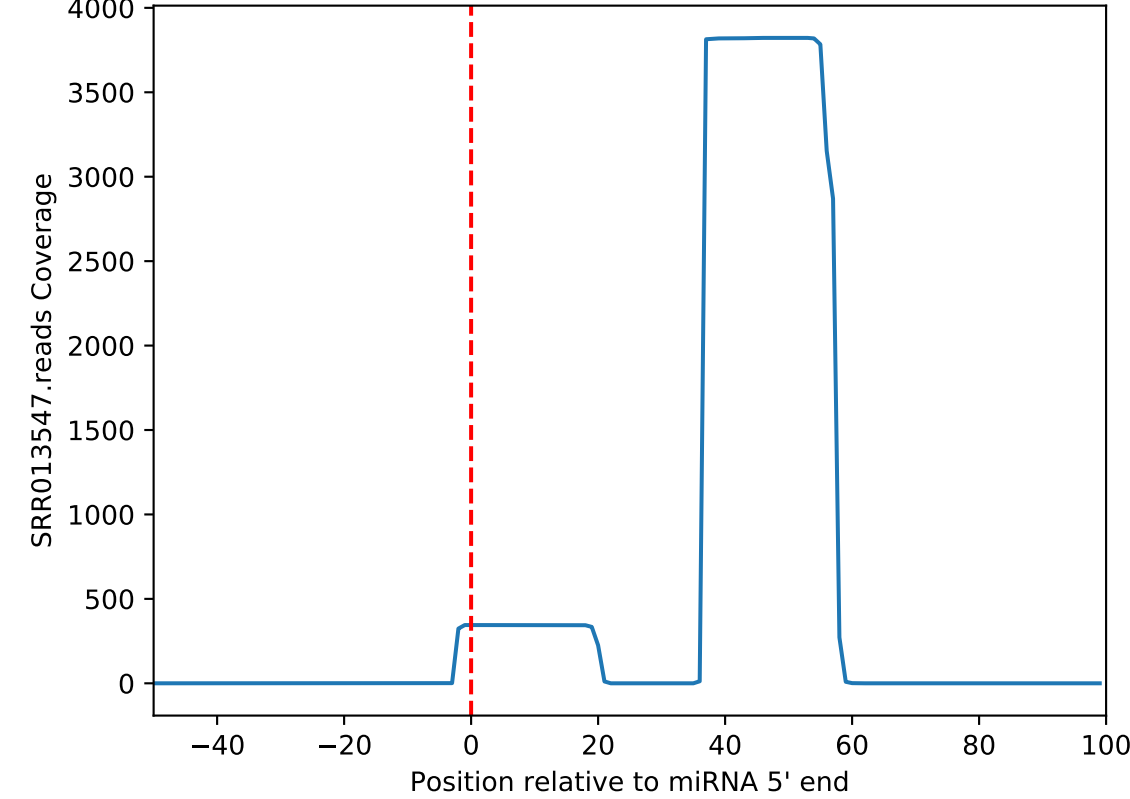

mir-995 (chr3R:20735939(+))

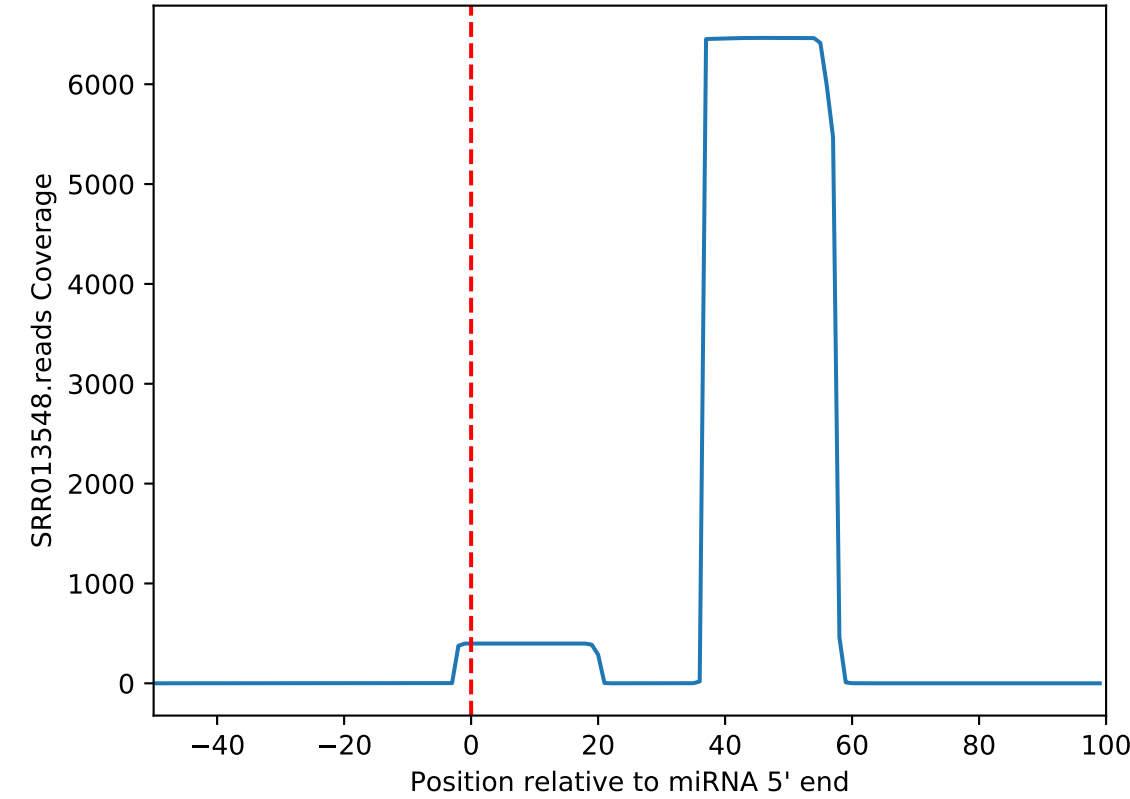

mir-991 (chr2R:20585275(-))

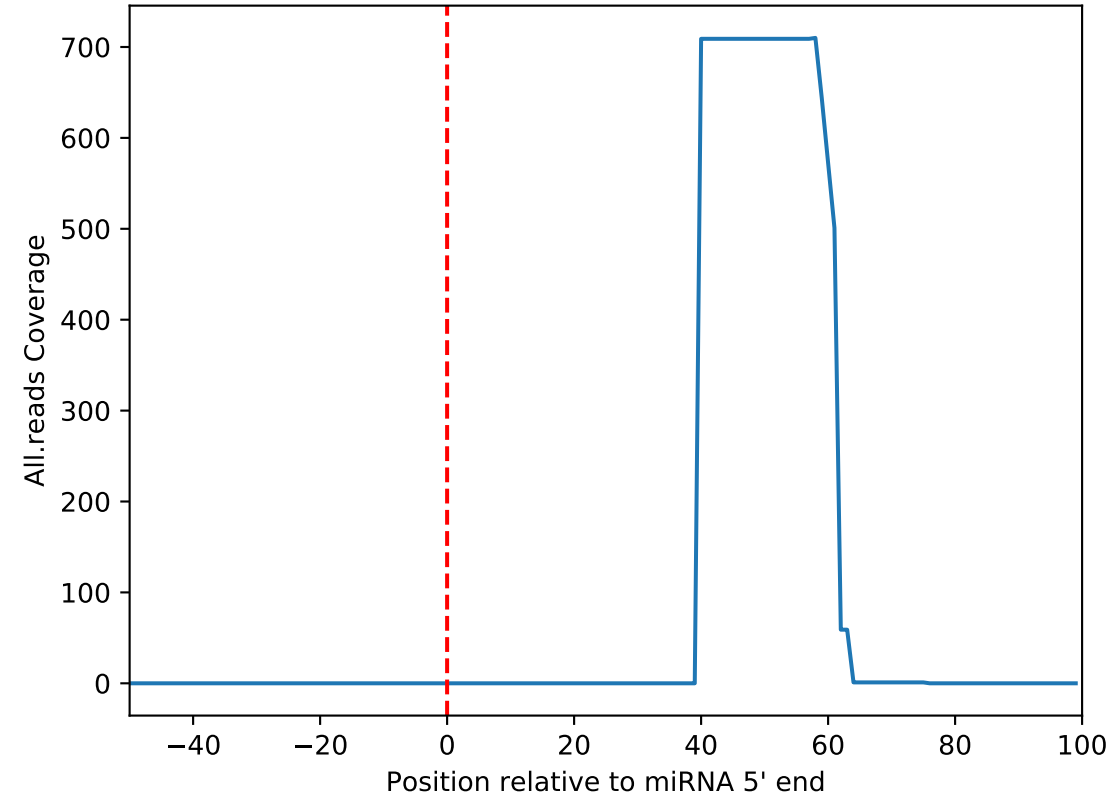

mir-991 (chr2R:20585275(-))

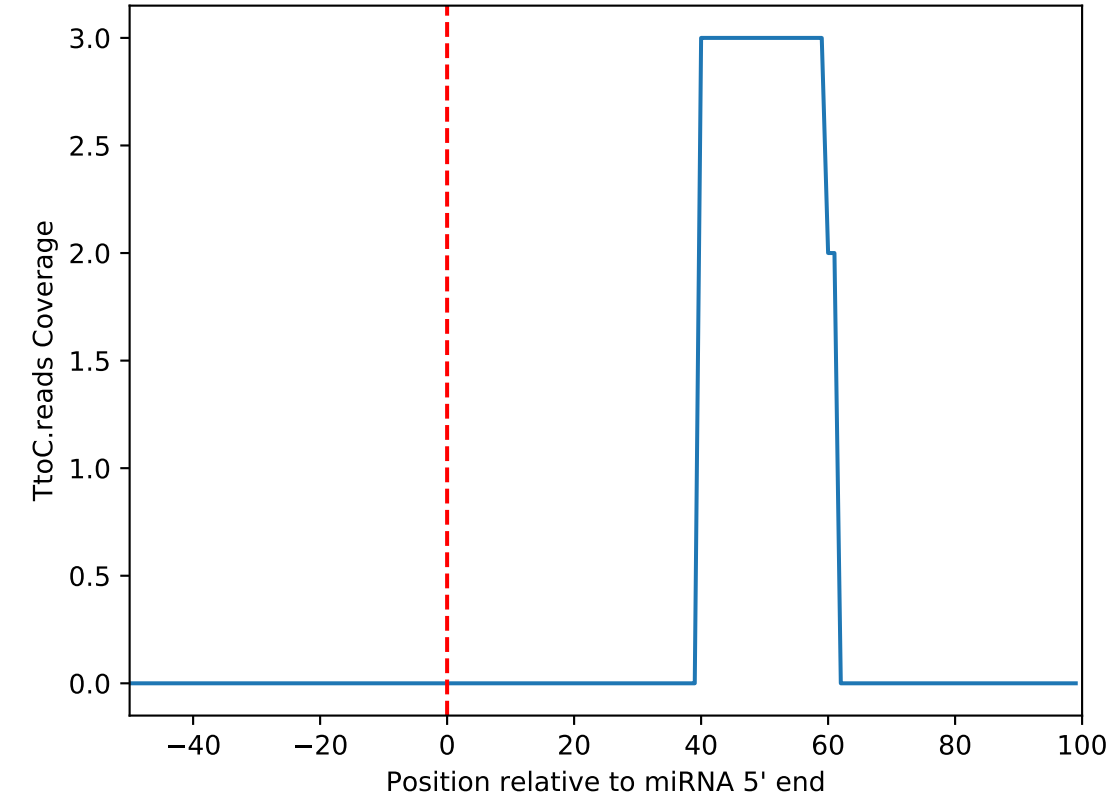

mir-991 (chr2R:20585275(-))

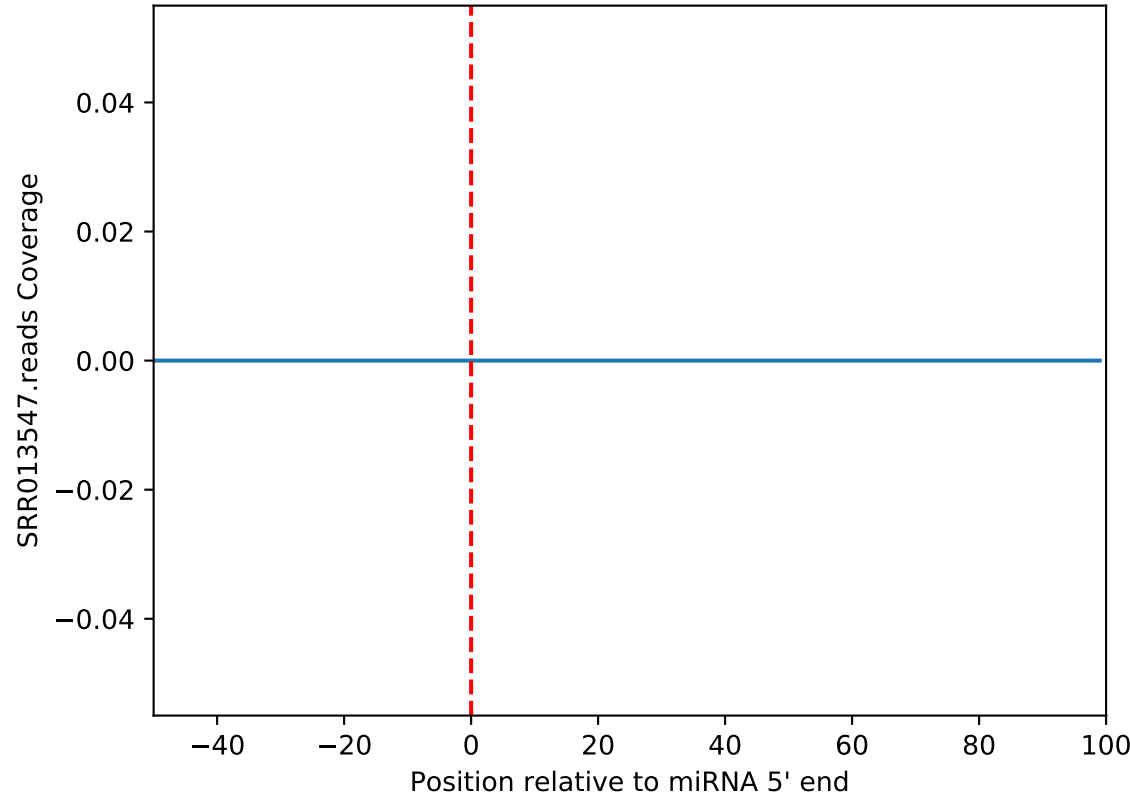

mir-991 (chr2R:20585275(-))

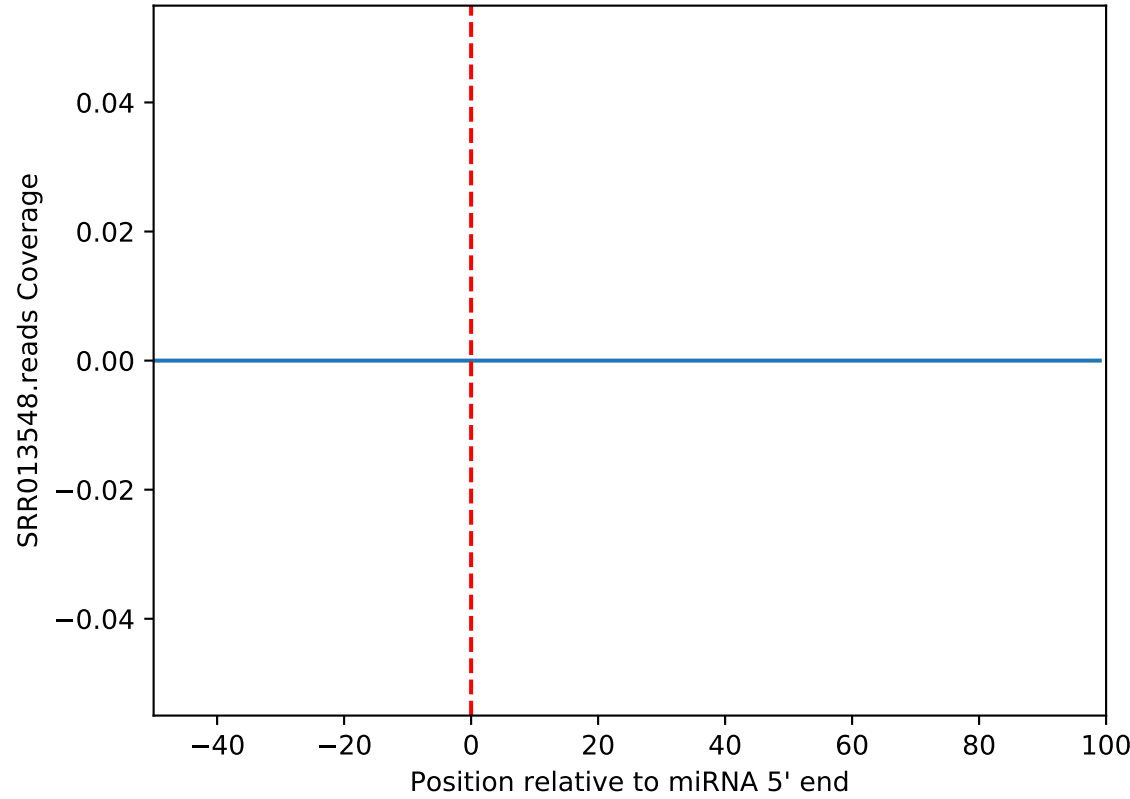



mir-278 (chr2R:15657083(+))

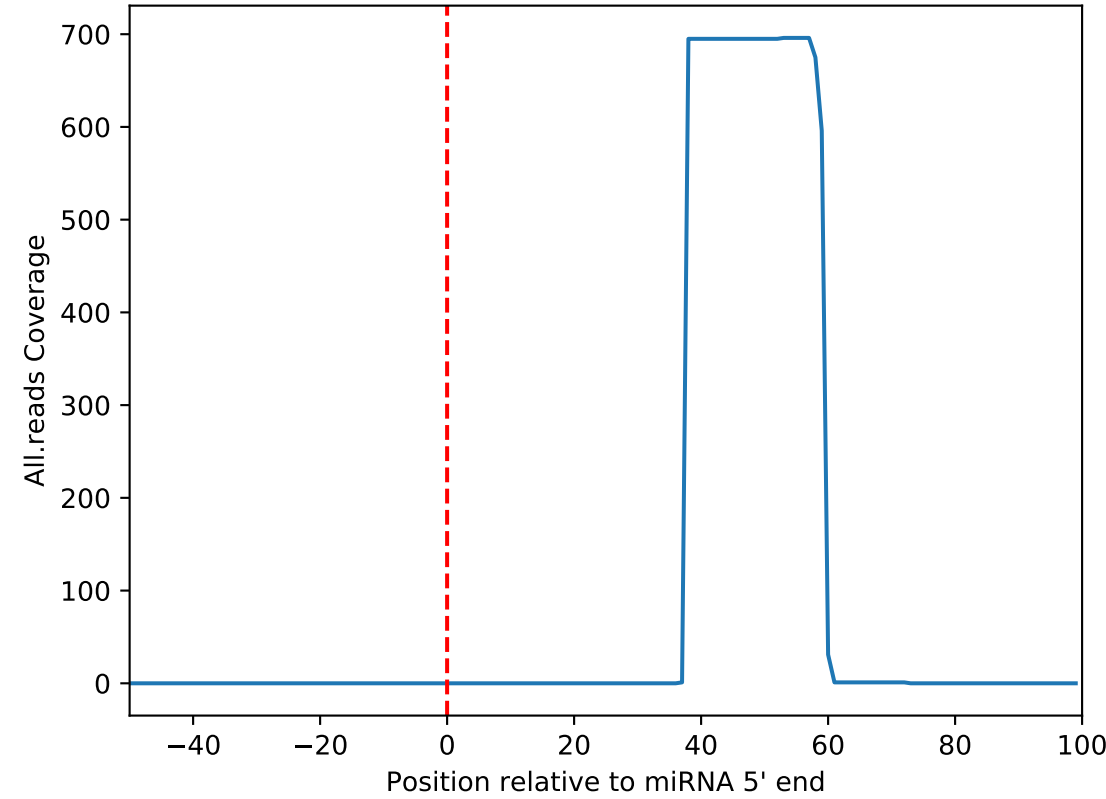

mir-278 (chr2R:15657083(+))

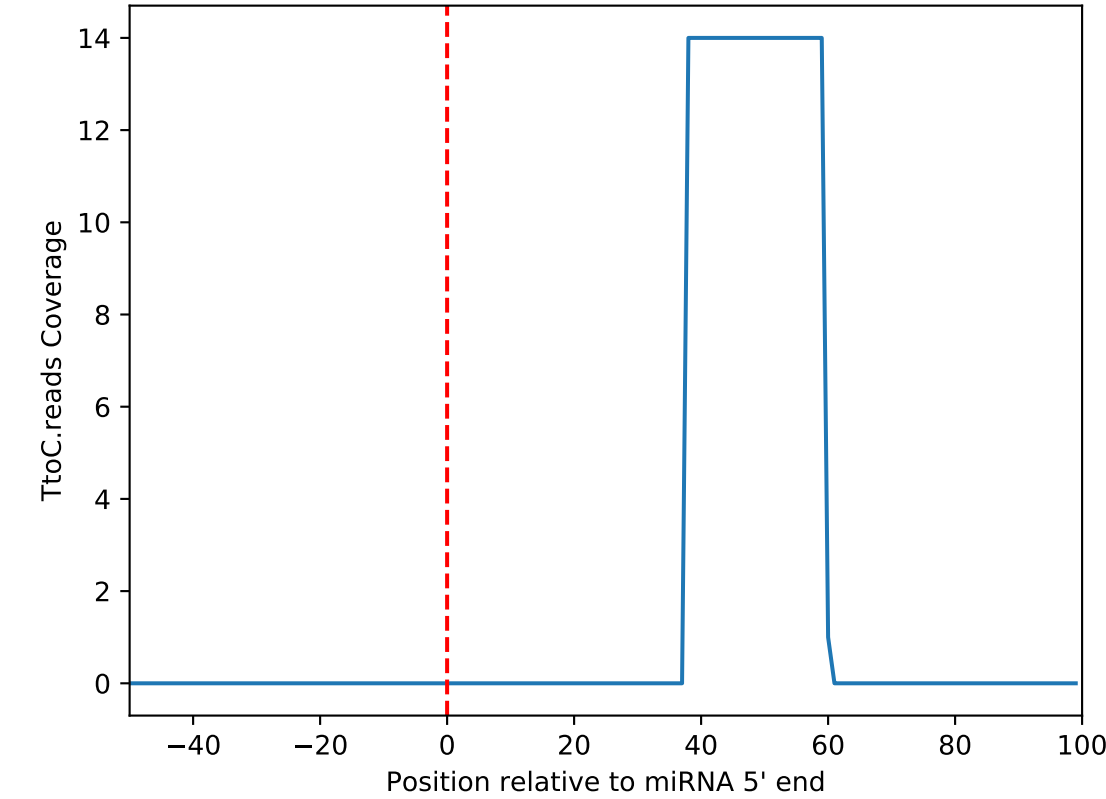

mir-278 (chr2R:15657083(+))

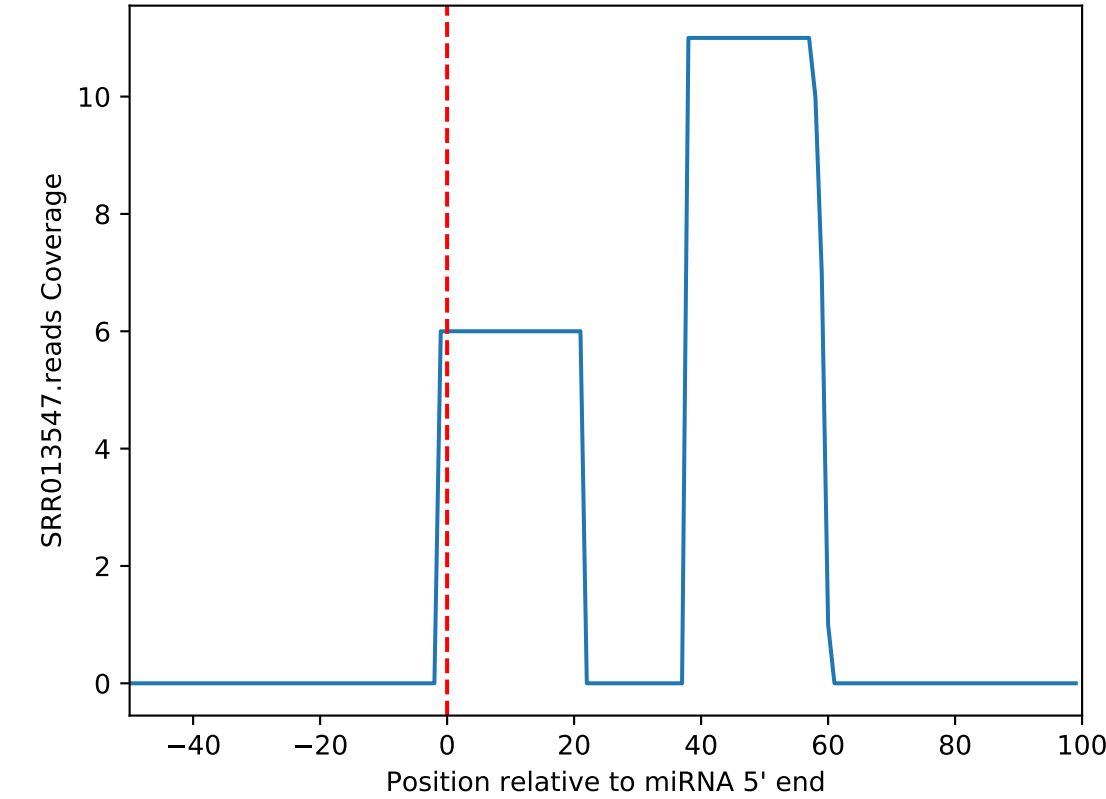

mir-278 (chr2R:15657083(+))

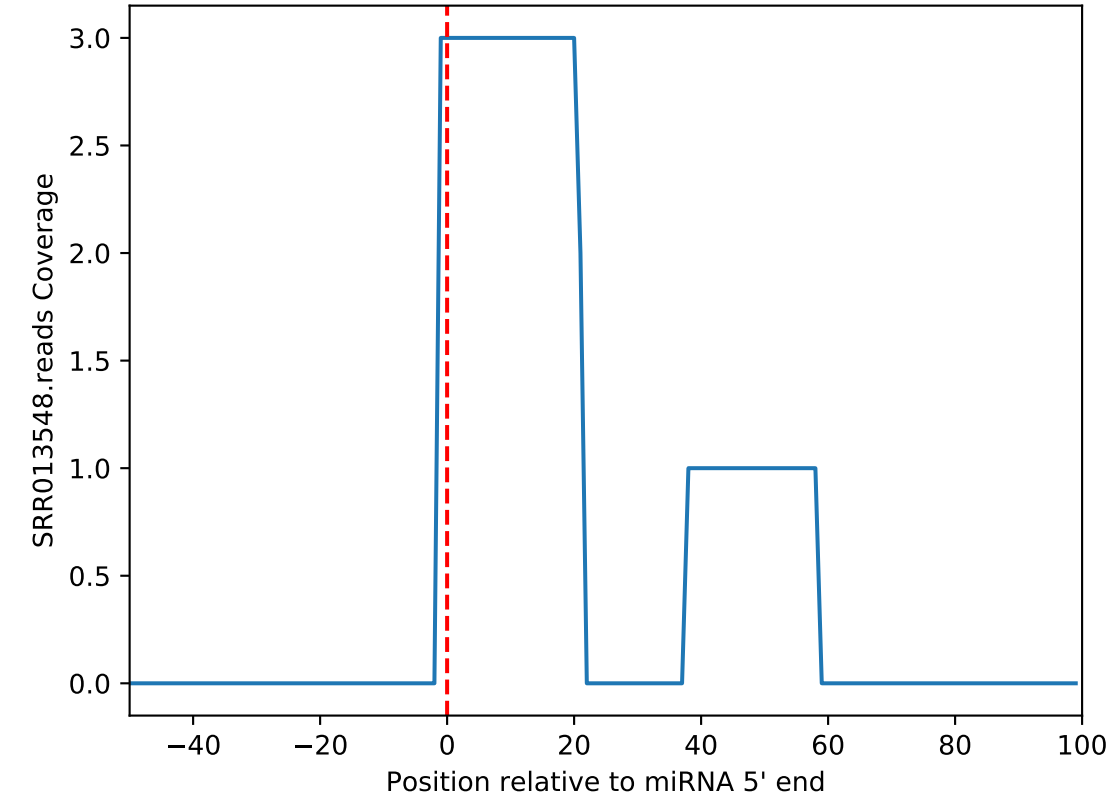

mir-307a (chr2R:9621326(-))

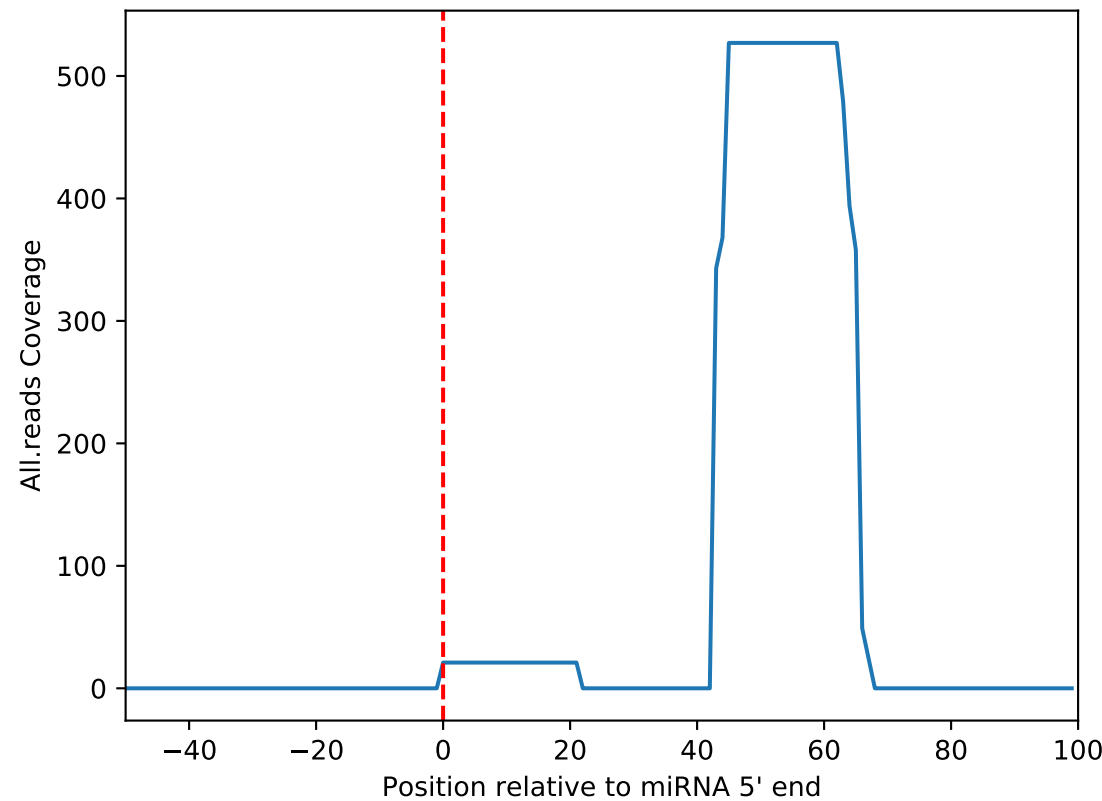

mir-307a (chr2R:9621326(-))

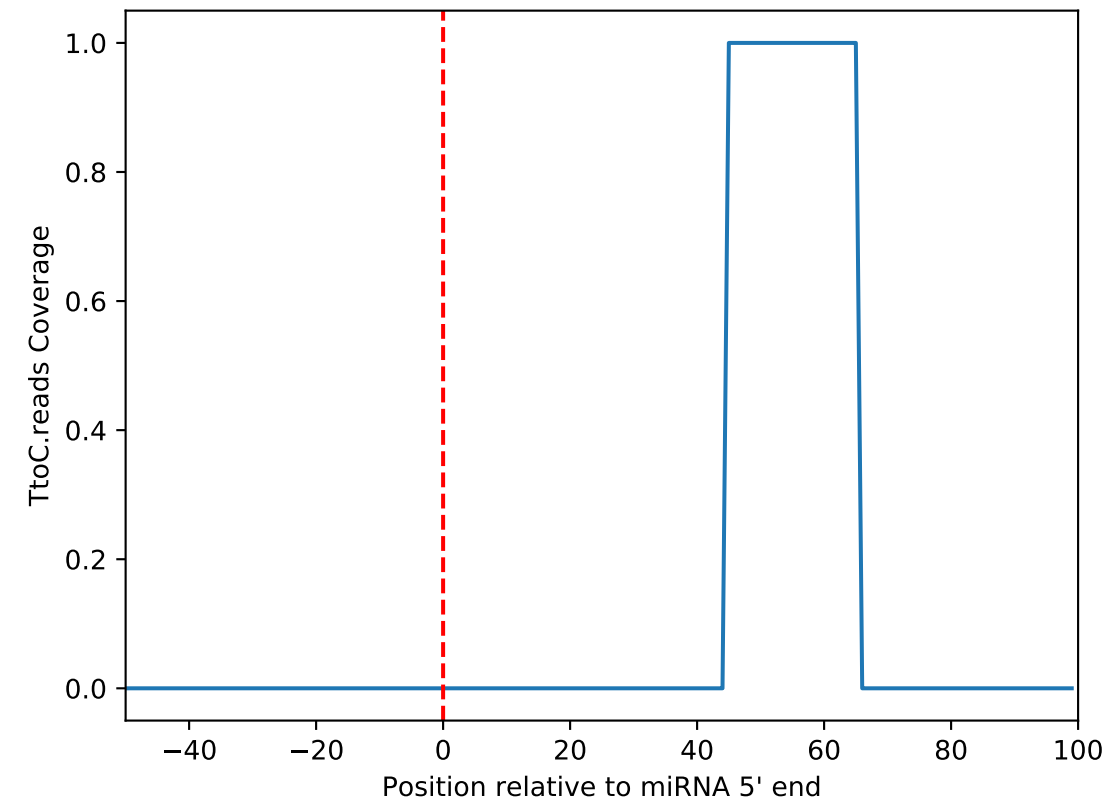

mir-307a (chr2R:9621326(-))

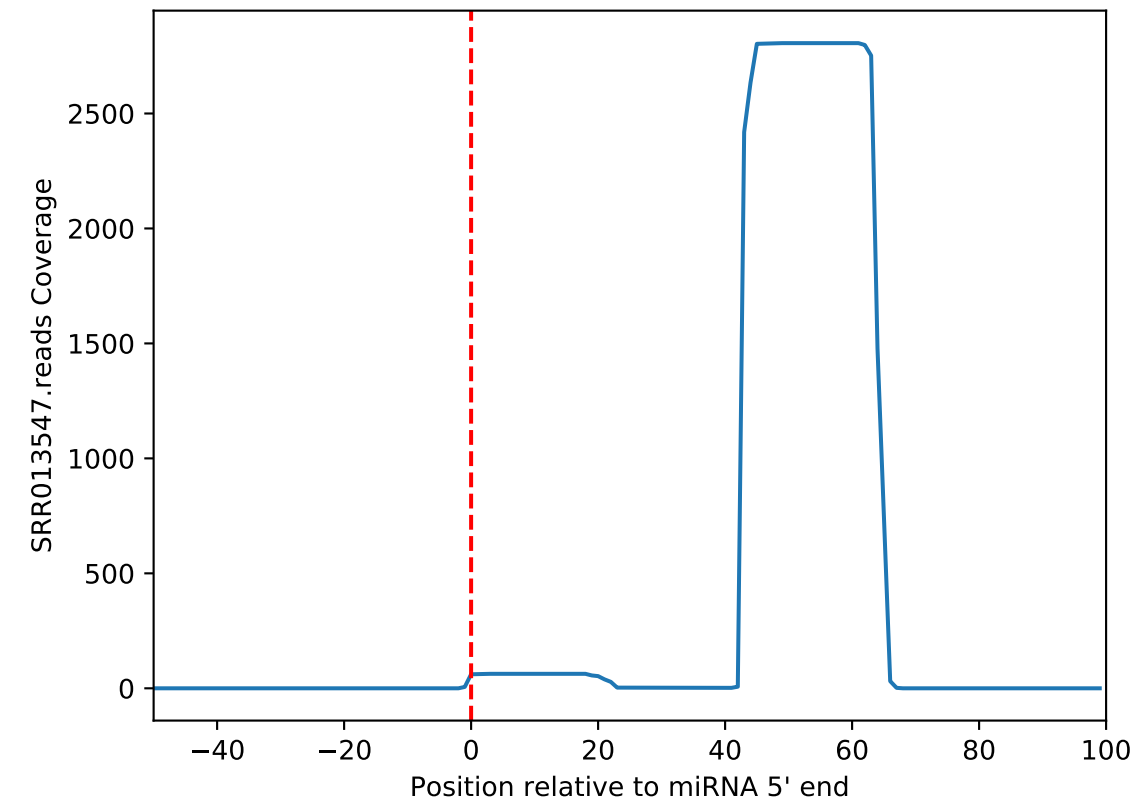

mir-307a (chr2R:9621326(-))

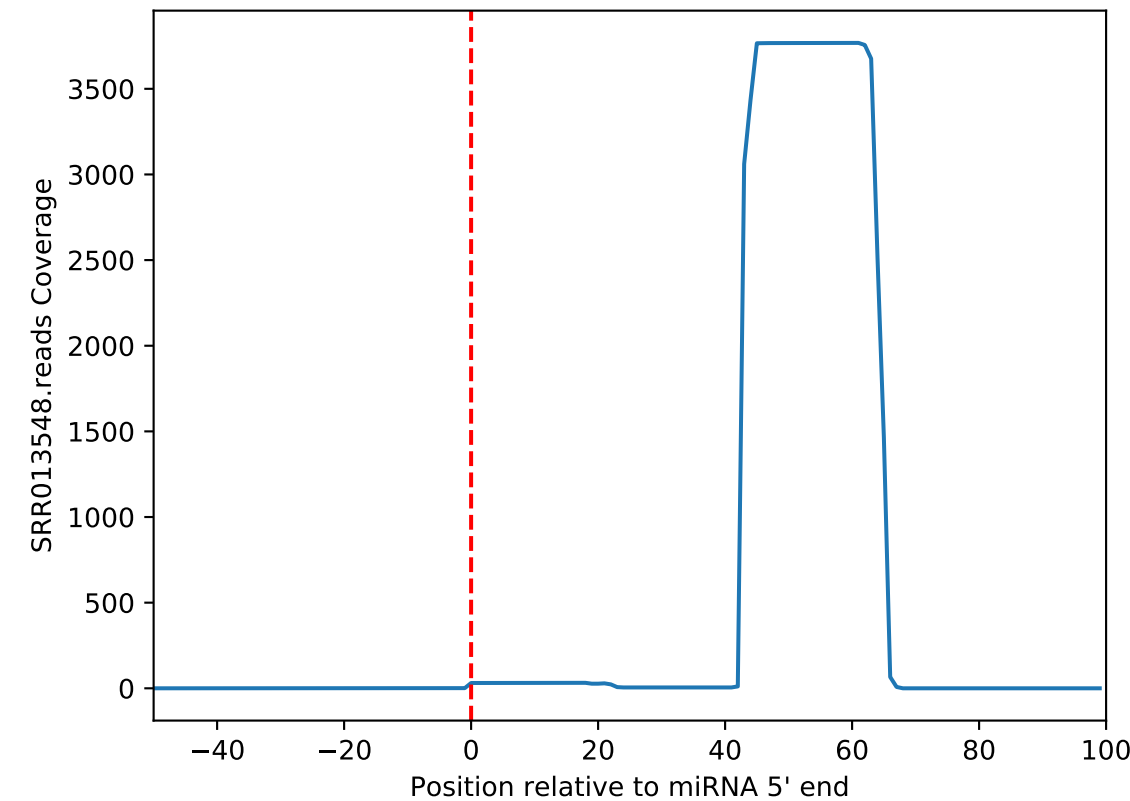

mir-308 (chr2R:14215862(-))

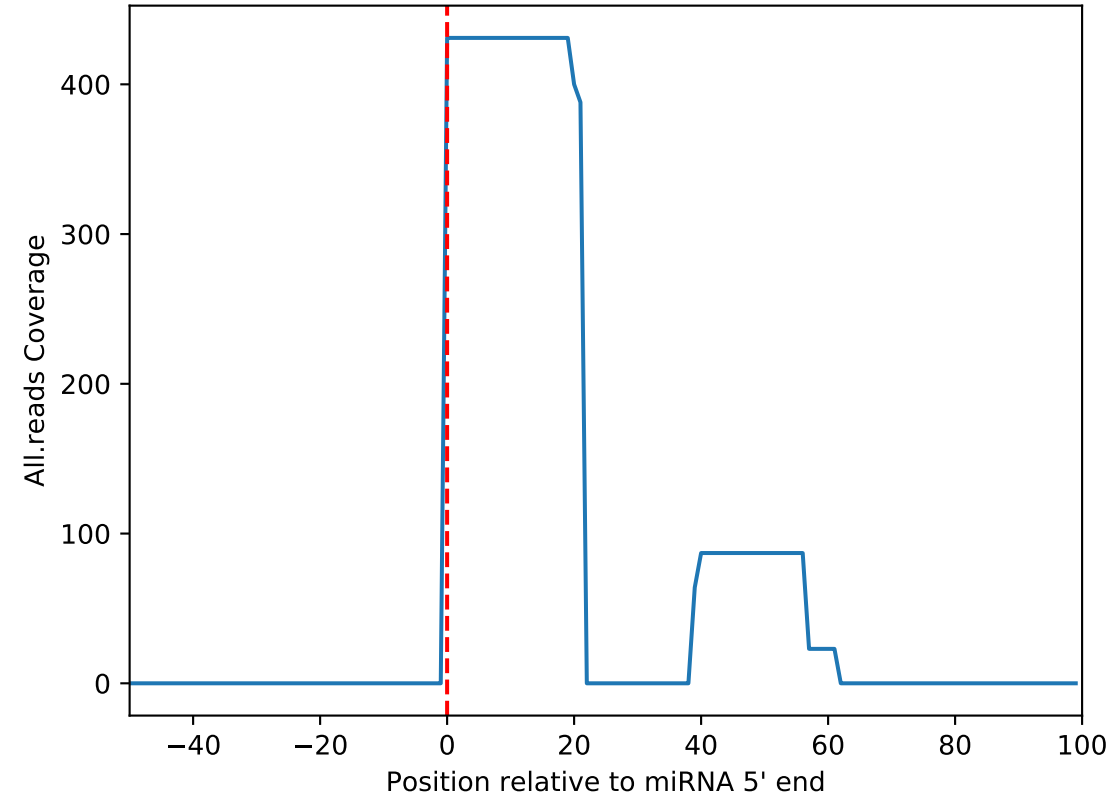

mir-308 (chr2R:14215862(-))

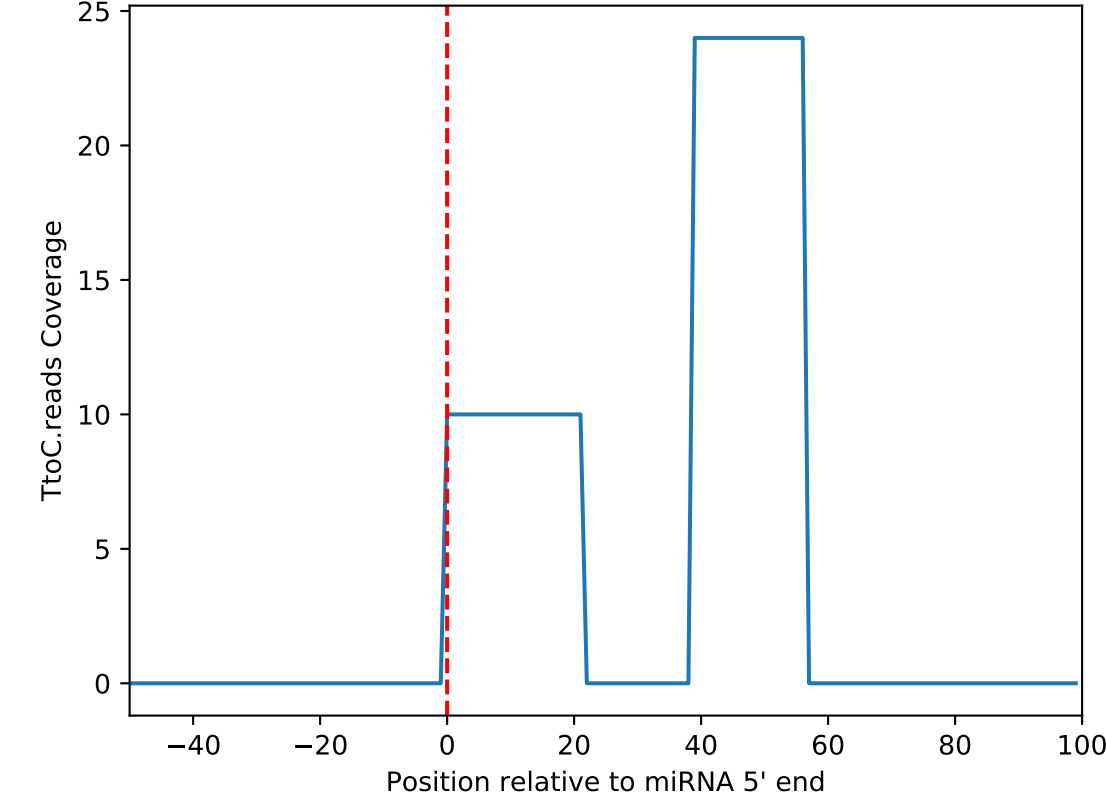

mir-308 (chr2R:14215862(-))

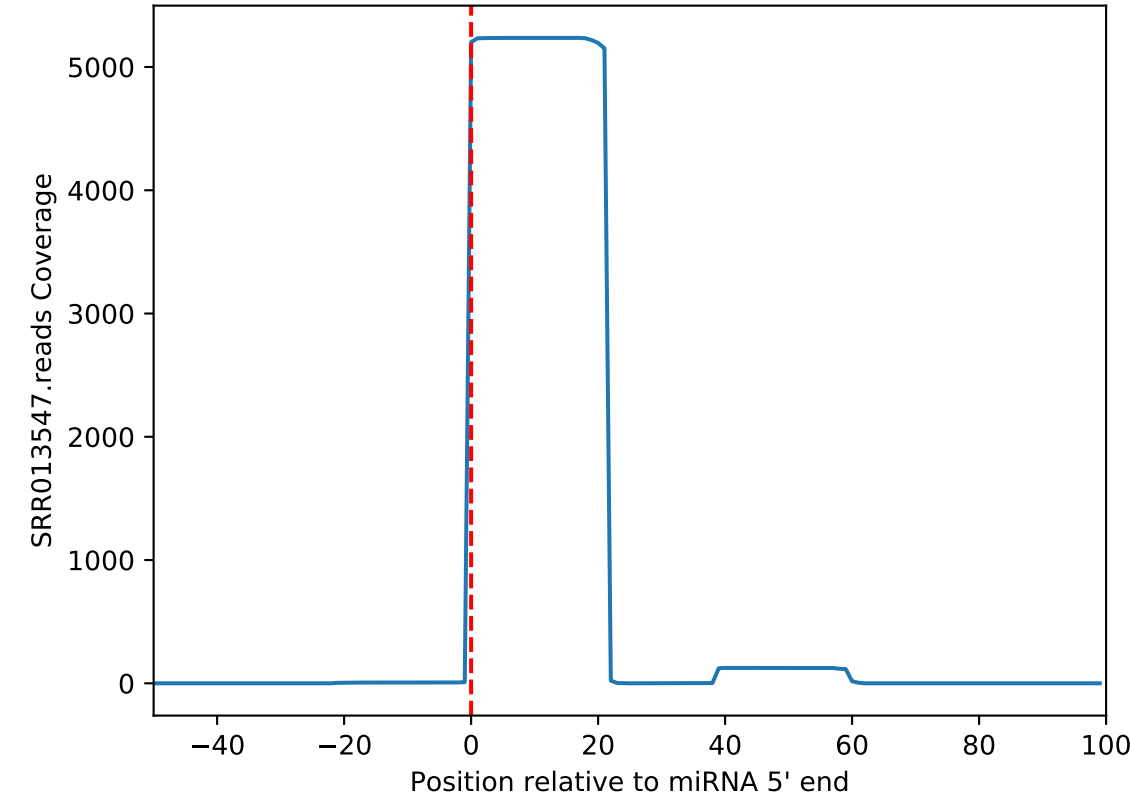

mir-308 (chr2R:14215862(-))

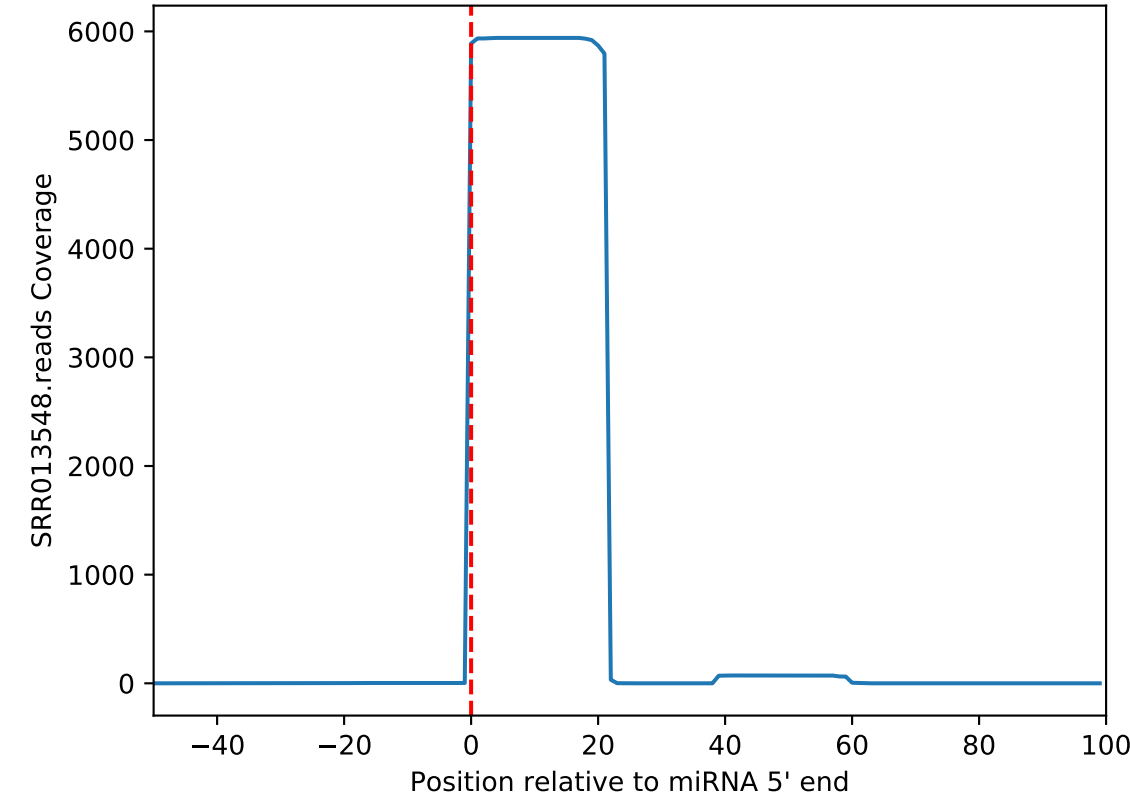

mir-9369 (chrX:19551318(+))

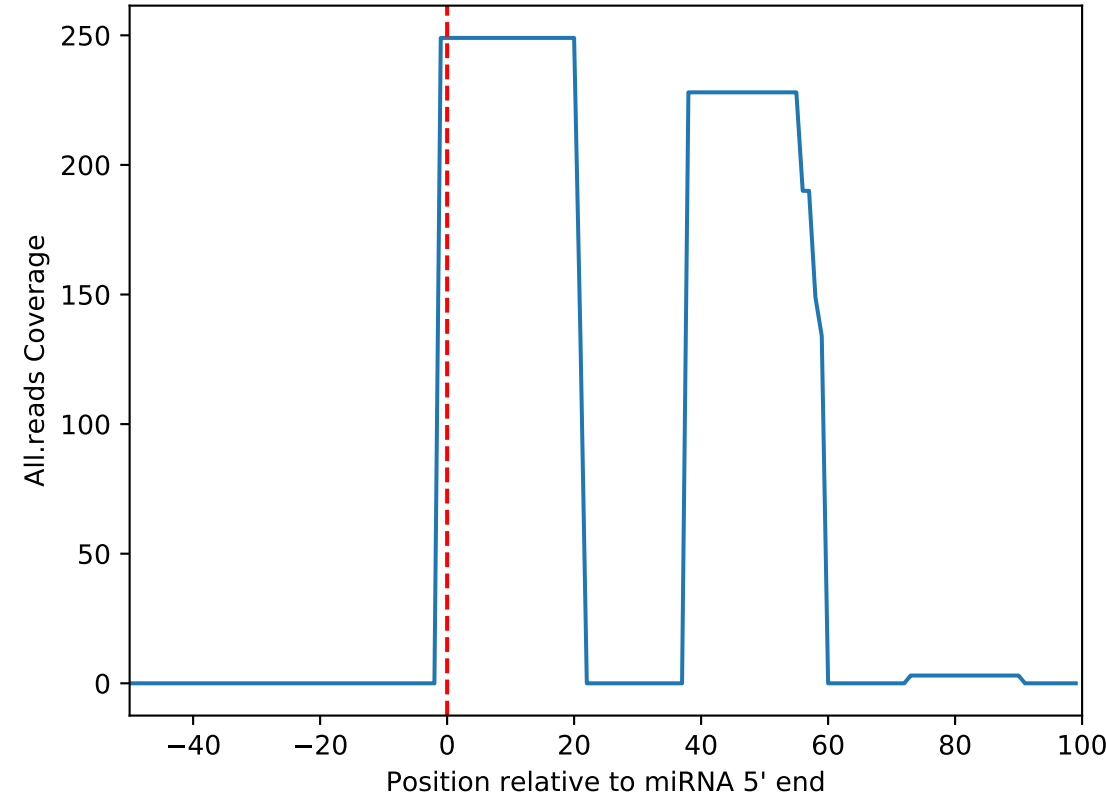

mir-9369 (chrX:19551318(+))

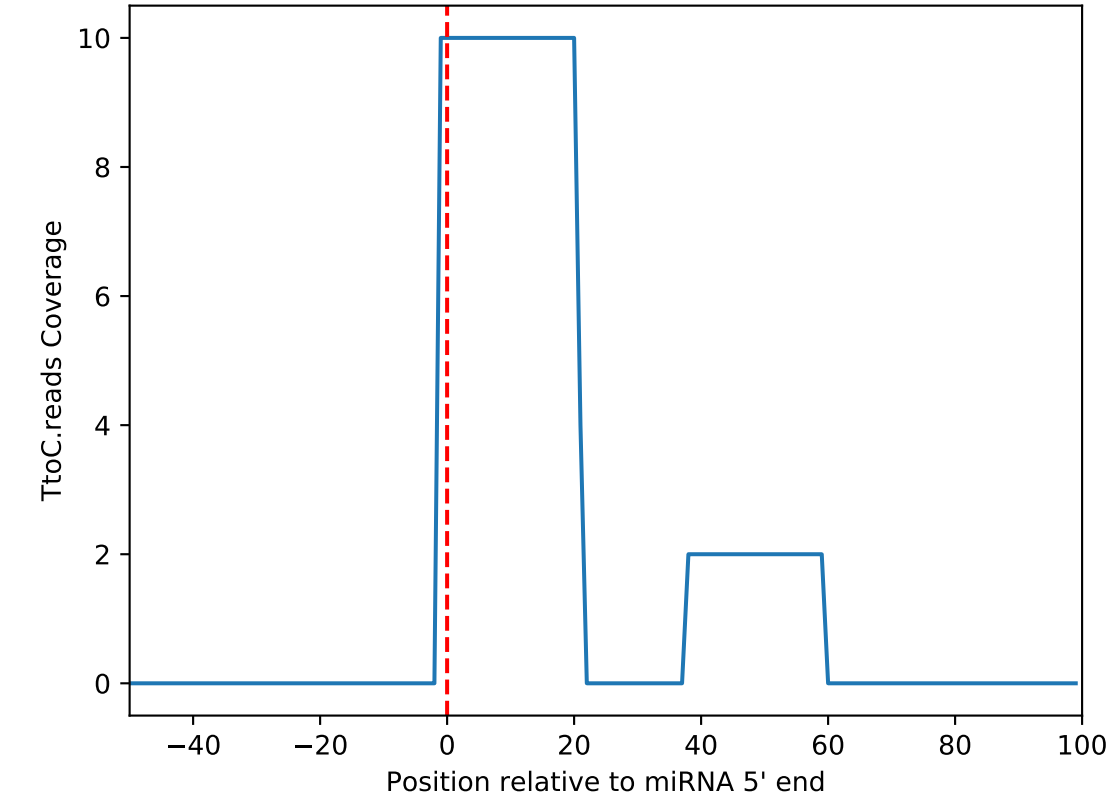

mir-9369 (chrX:19551318(+))

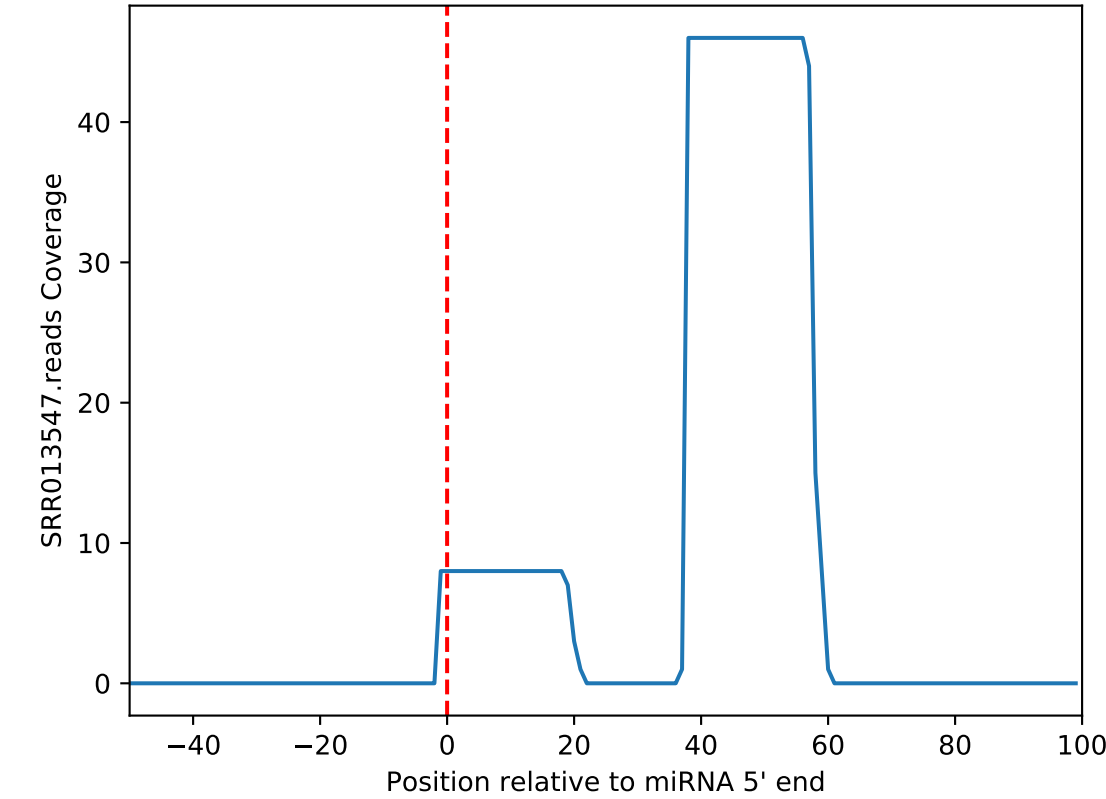

mir-9369 (chrX:19551318(+))



mir-974 (chrX:19551702(+))

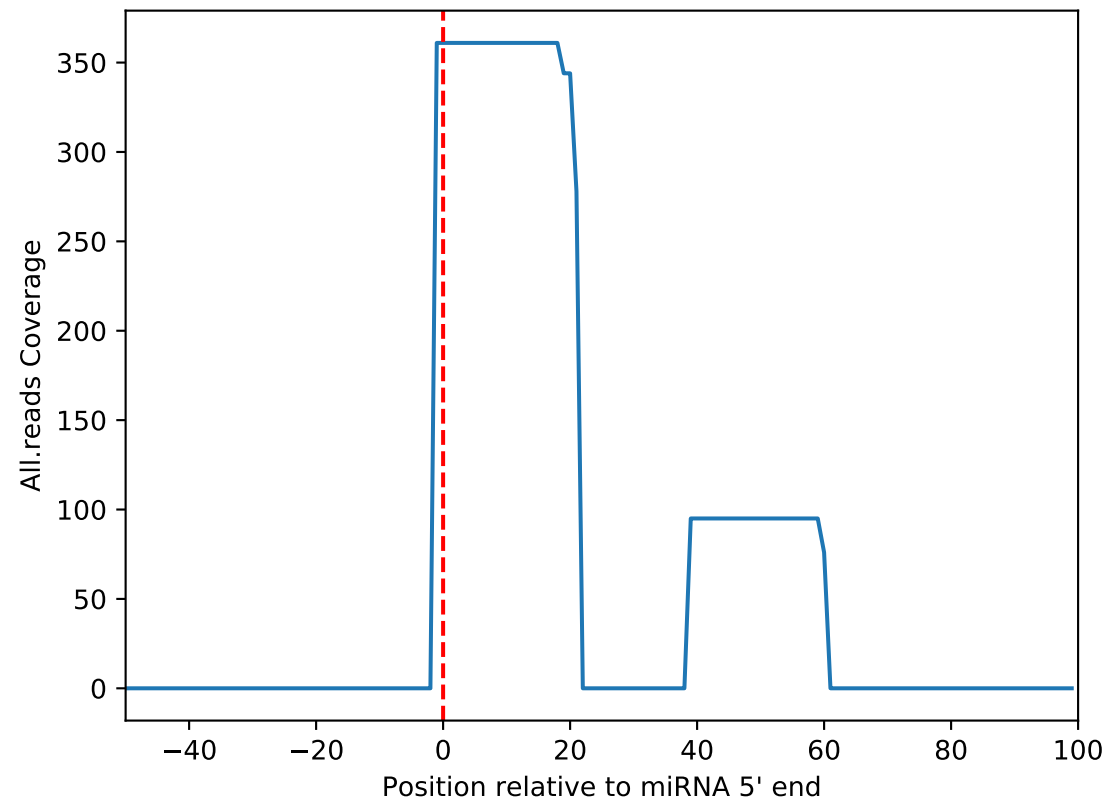

mir-974 (chrX:19551702(+))

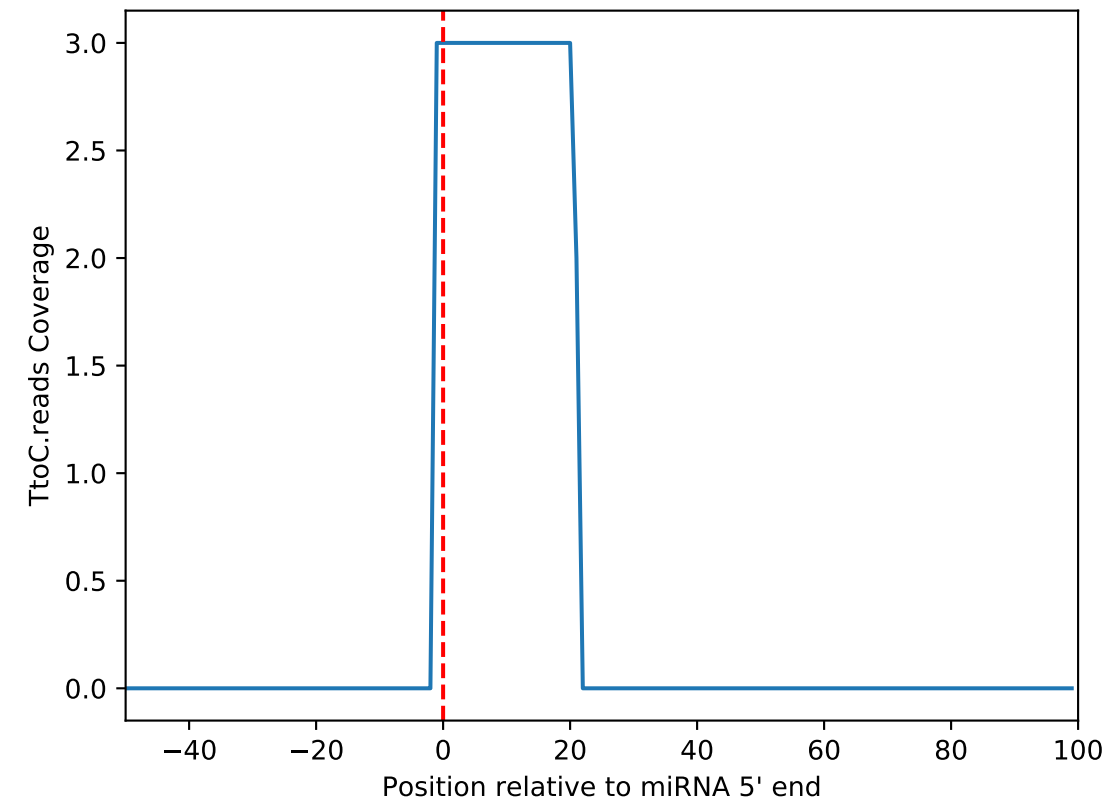

mir-974 (chrX:19551702(+))

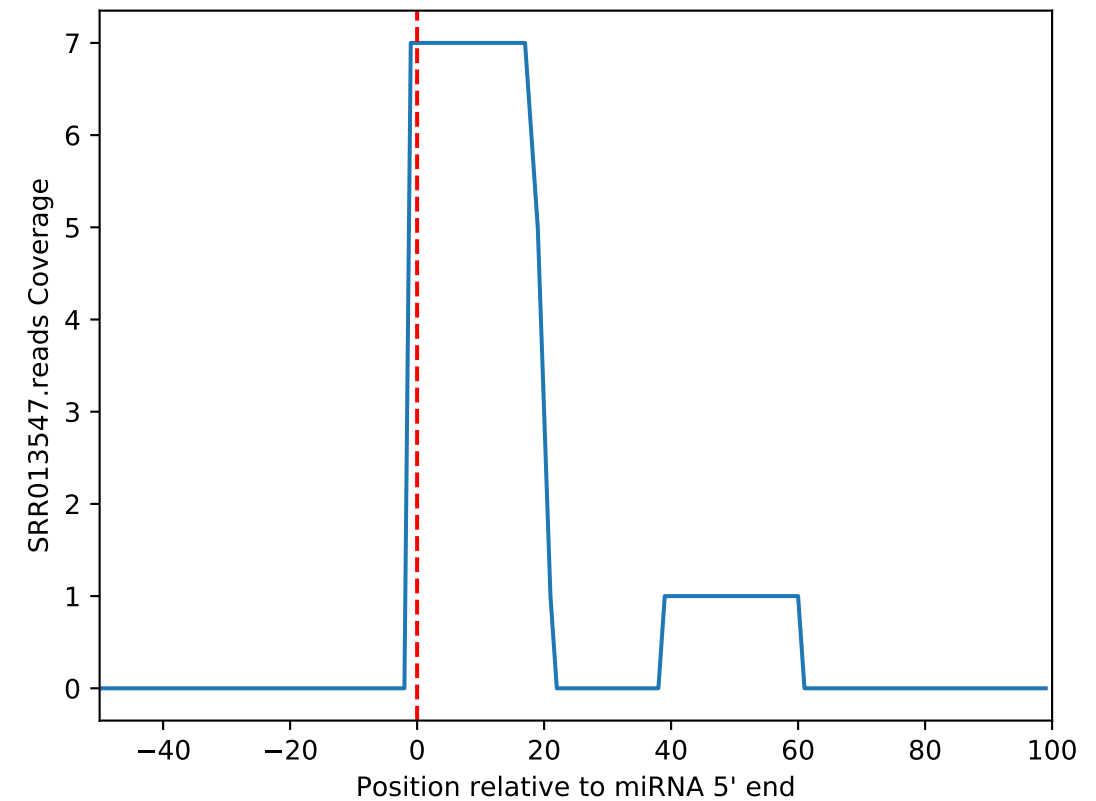

mir-974 (chrX:19551702(+))

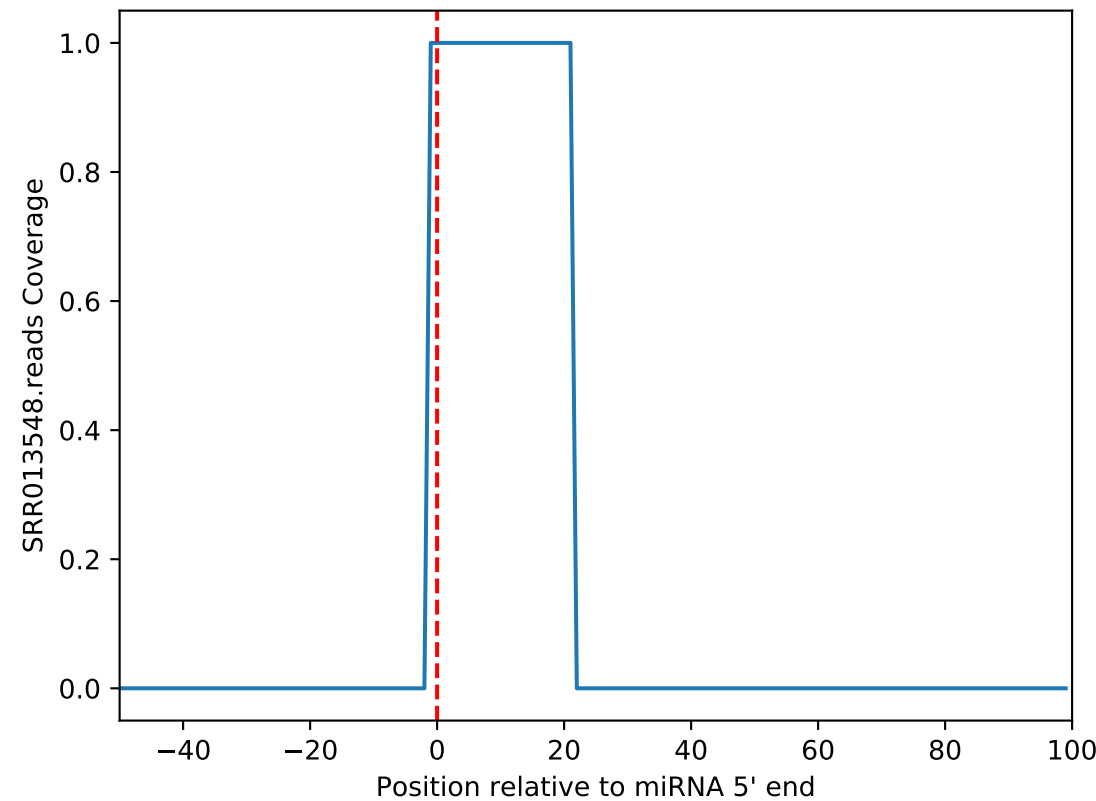

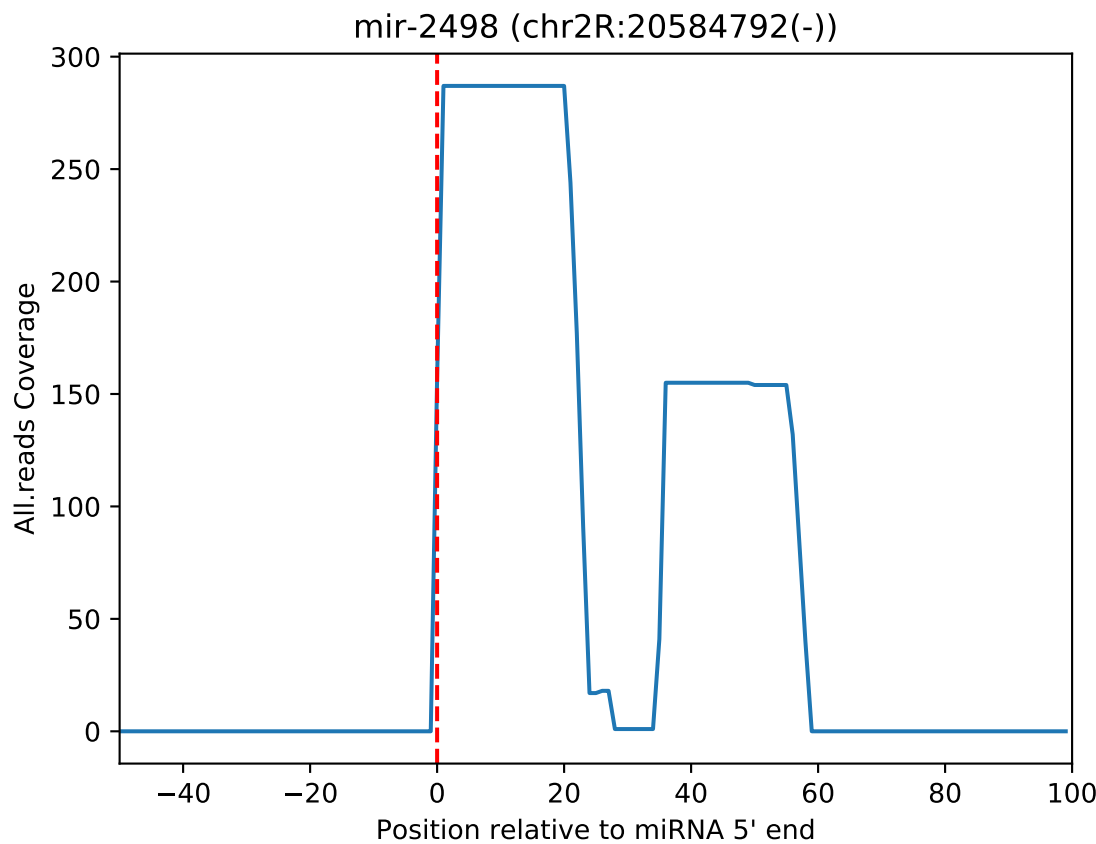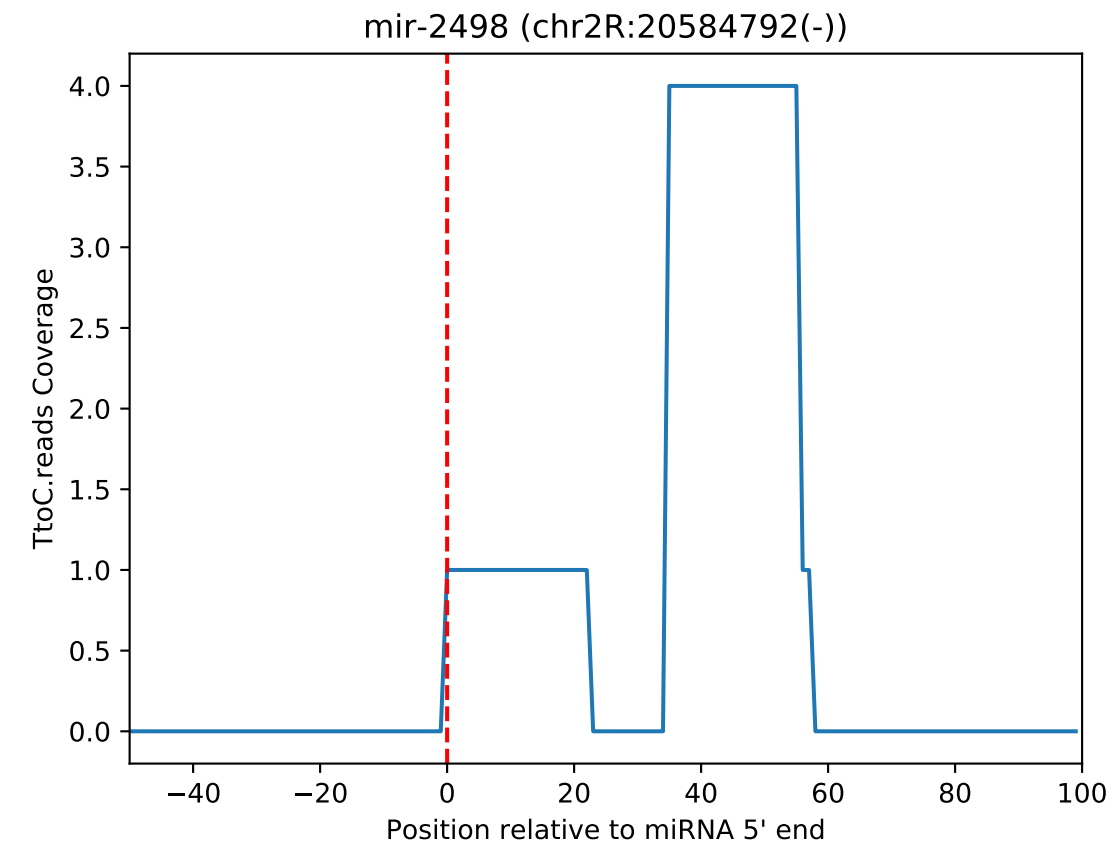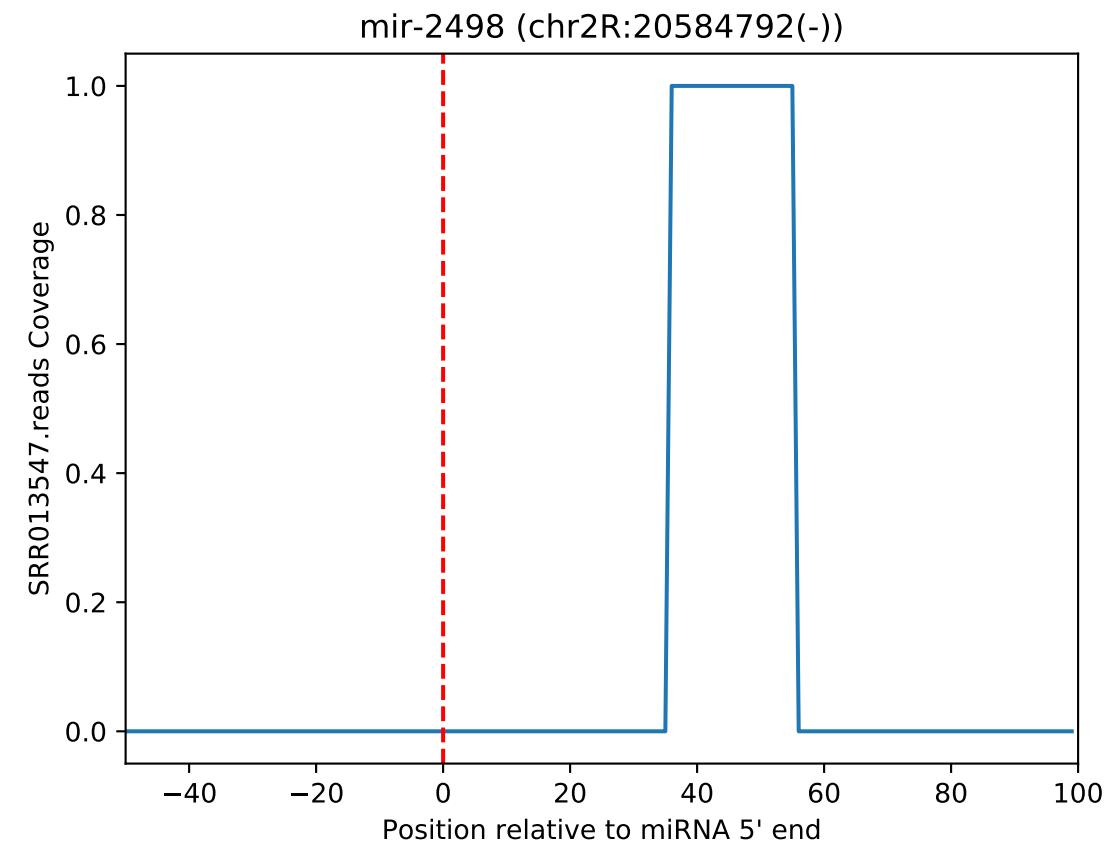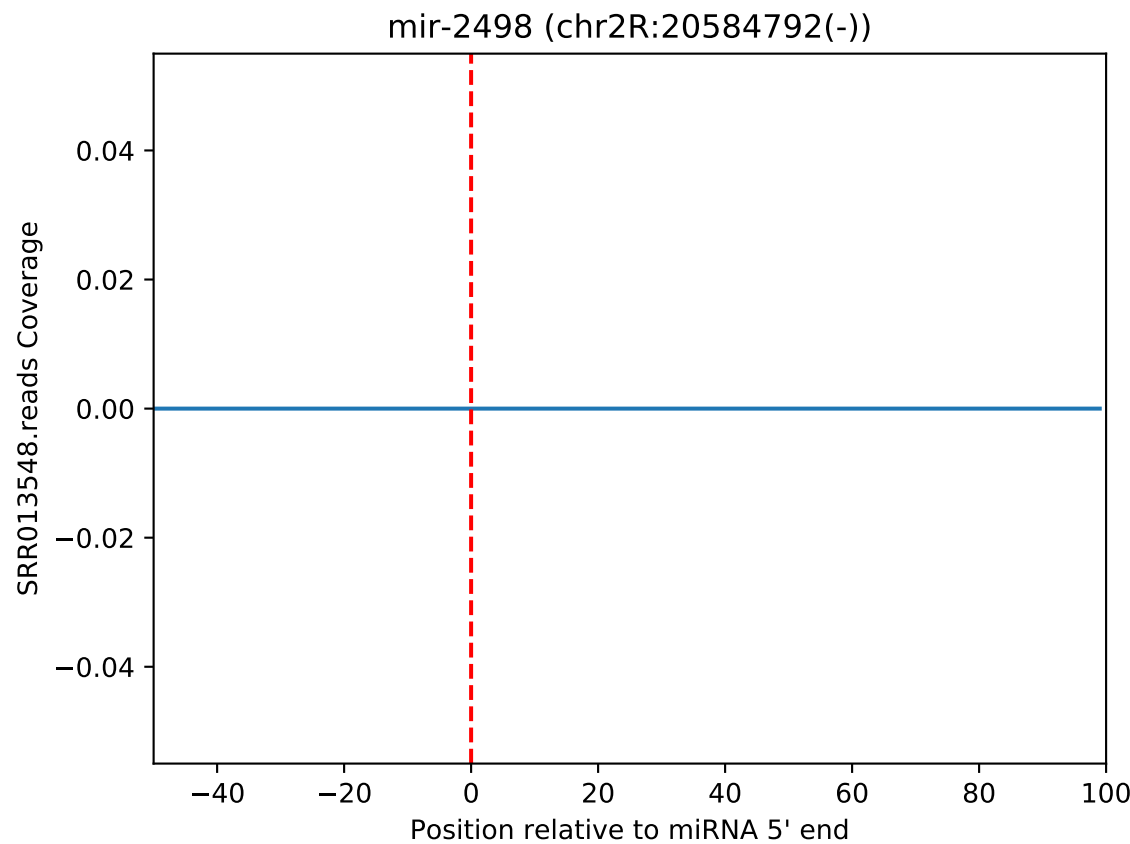

mir-972 (chrX:19551171(+))

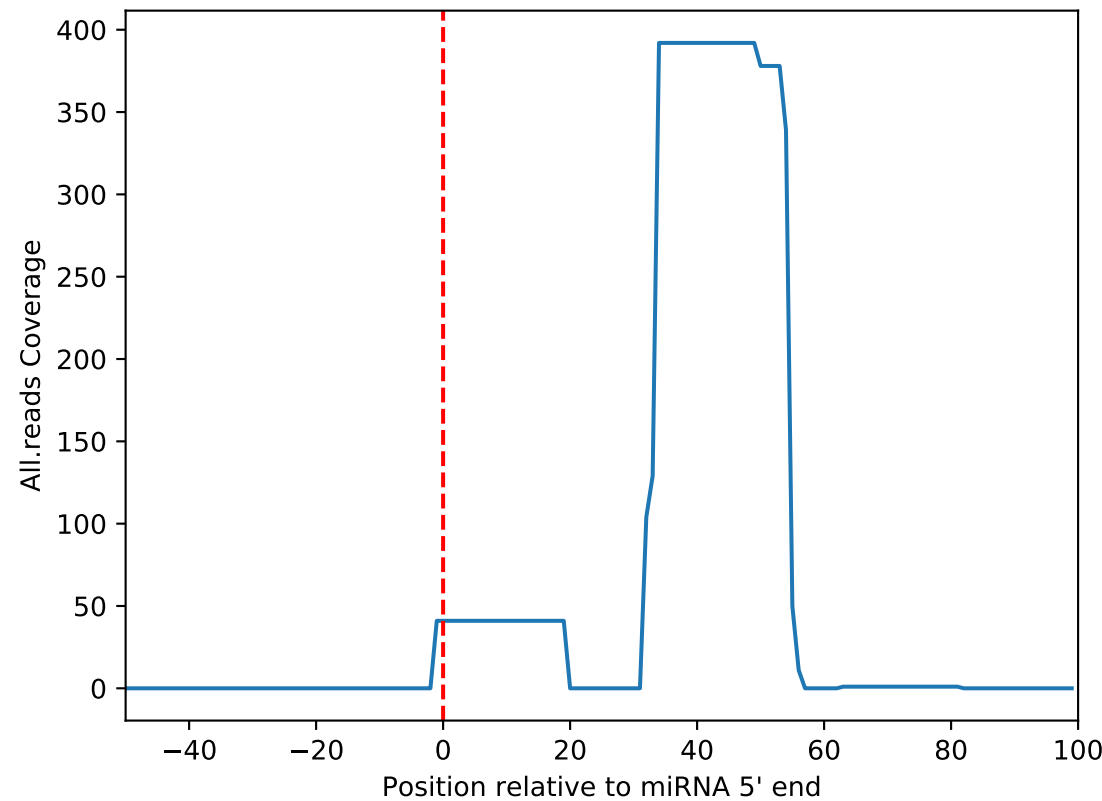

mir-972 (chrX:19551171(+))

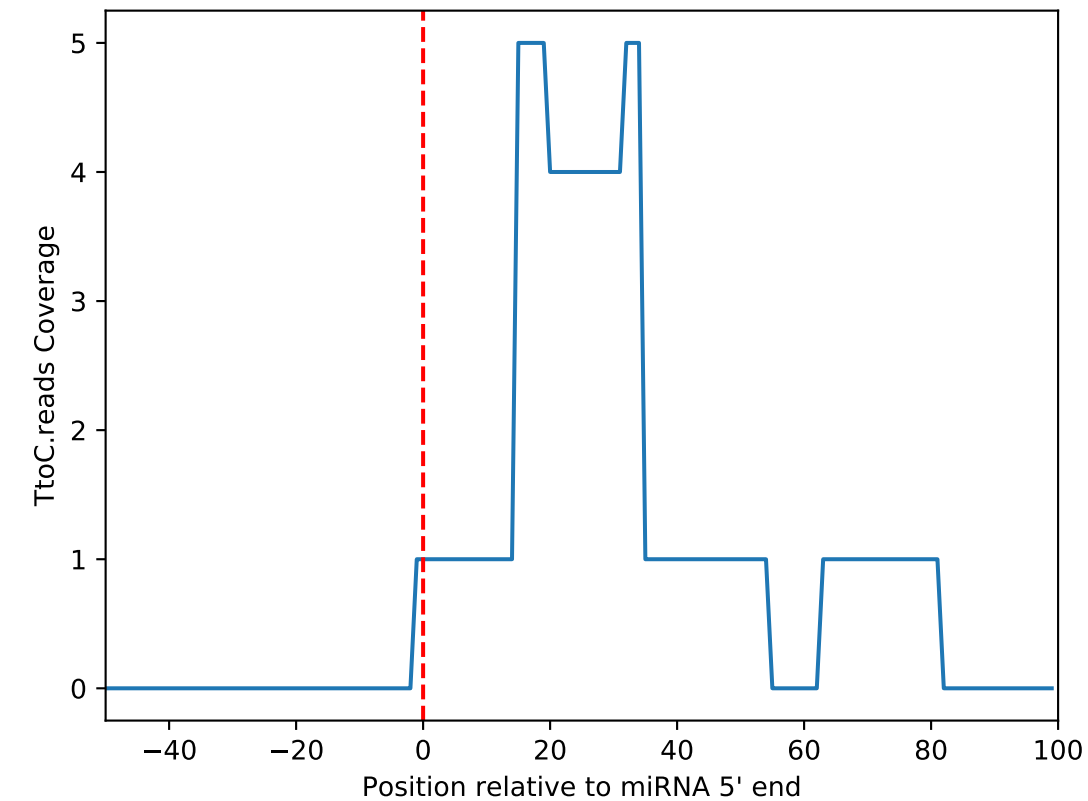

mir-972 (chrX:19551171(+))

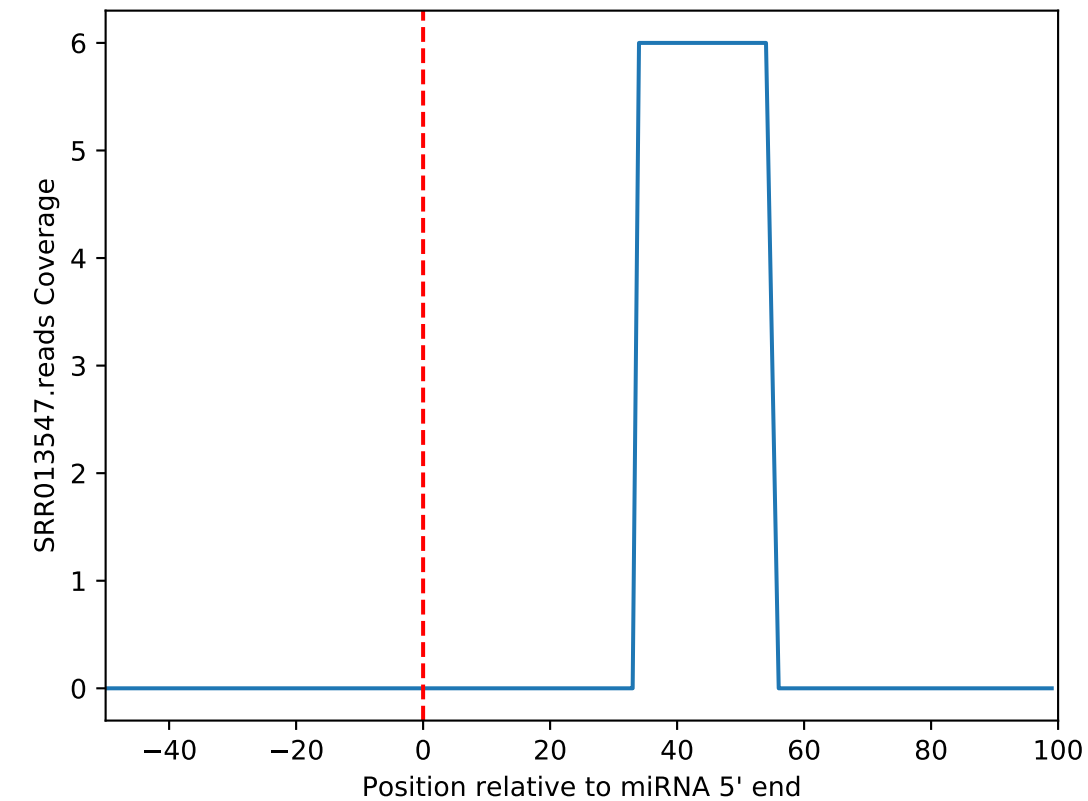

mir-972 (chrX:19551171(+))

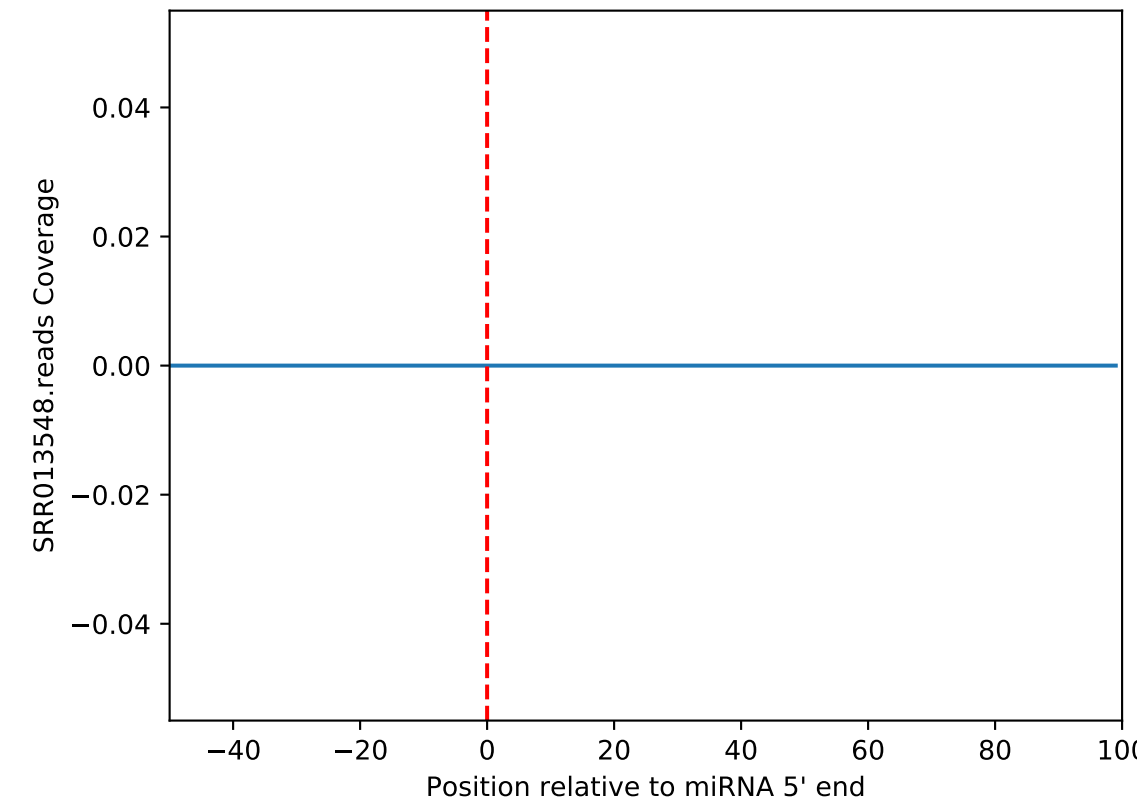

mir-978 (chrX:19561251(+))

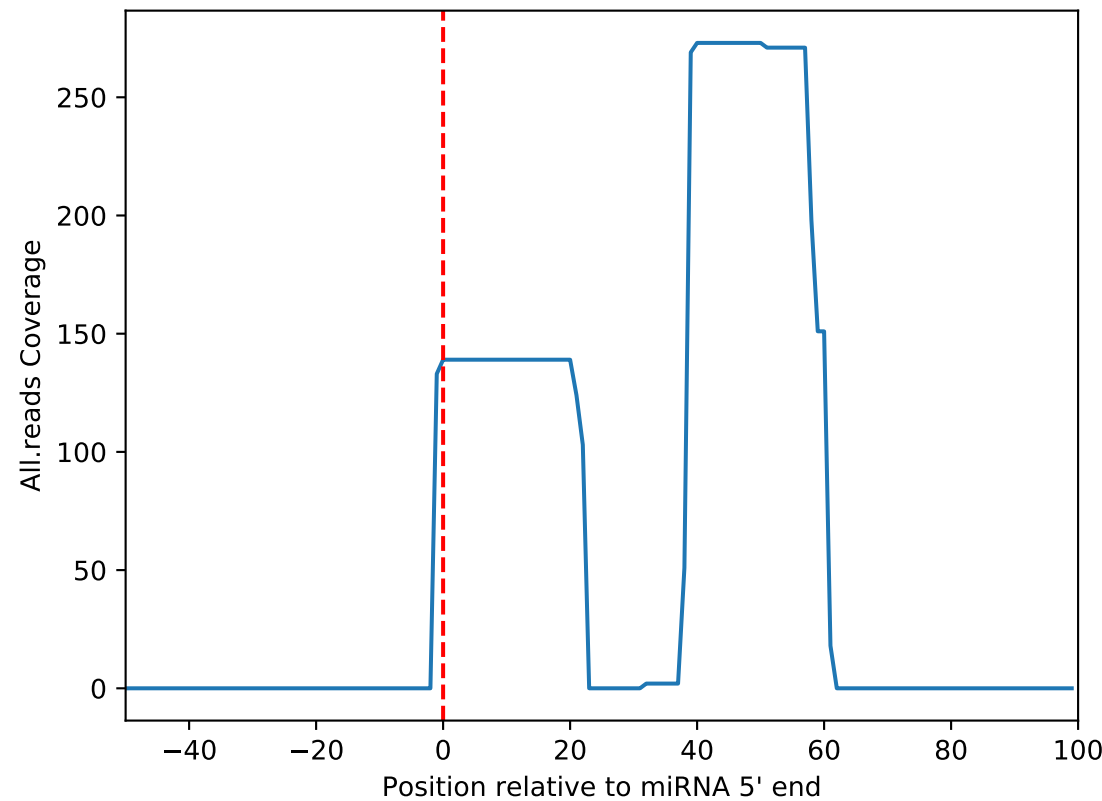

mir-978 (chrX:19561251(+))

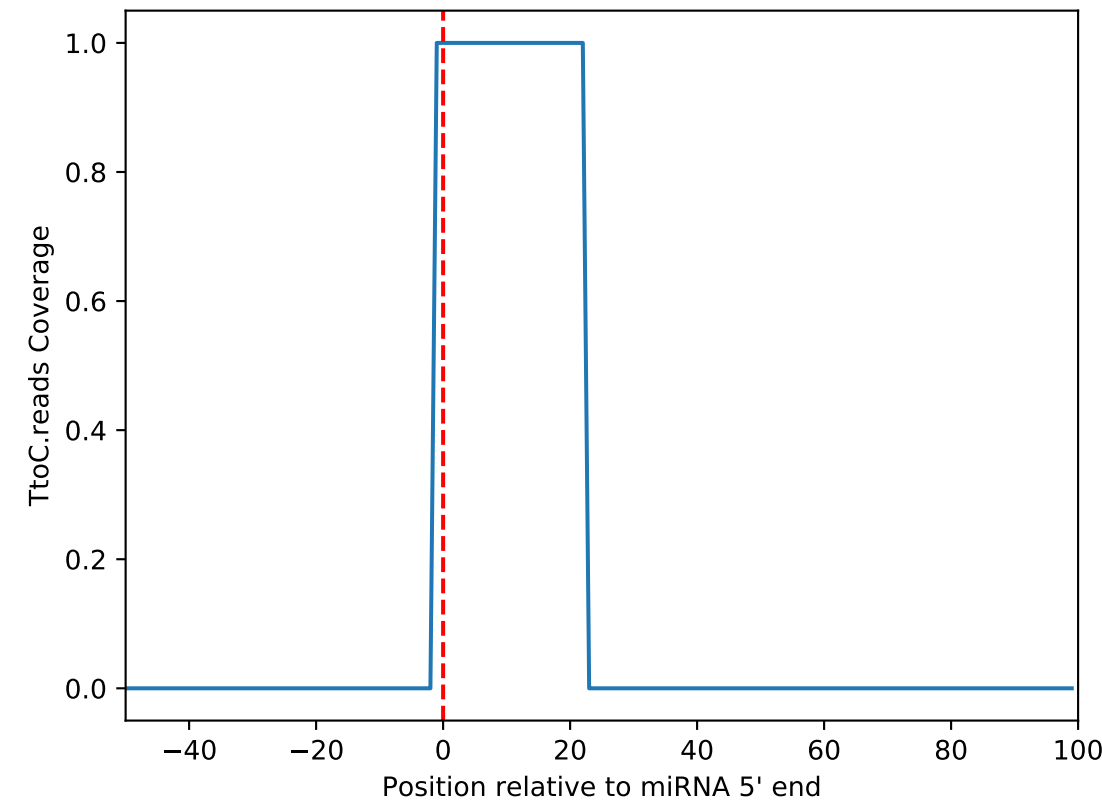

mir-978 (chrX:19561251(+))

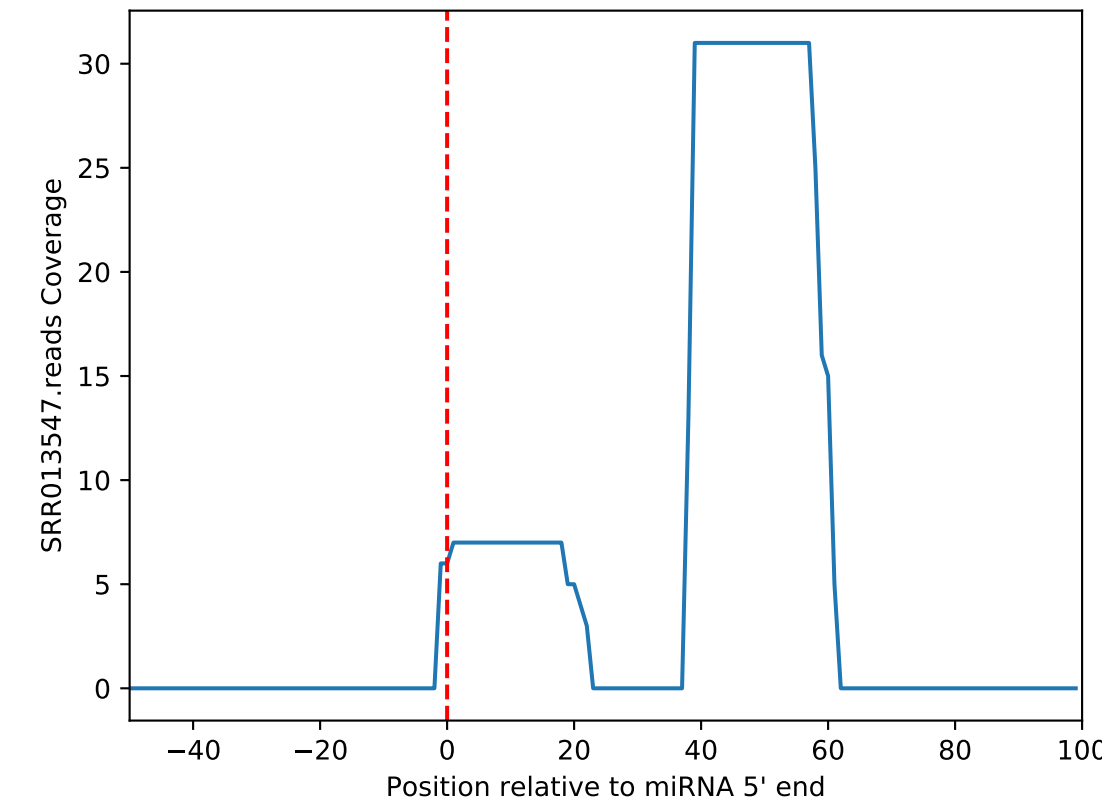

mir-978 (chrX:19561251(+))





mir-973 (chrX:19551546(+))

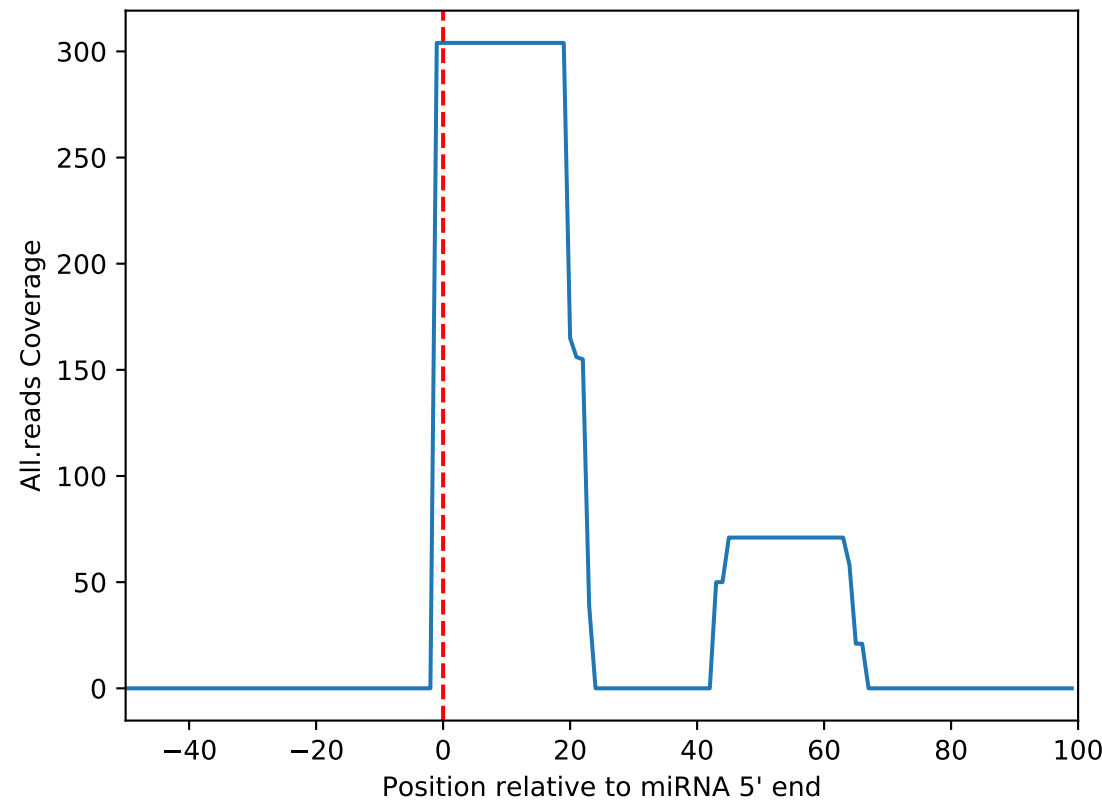

mir-973 (chrX:19551546(+))

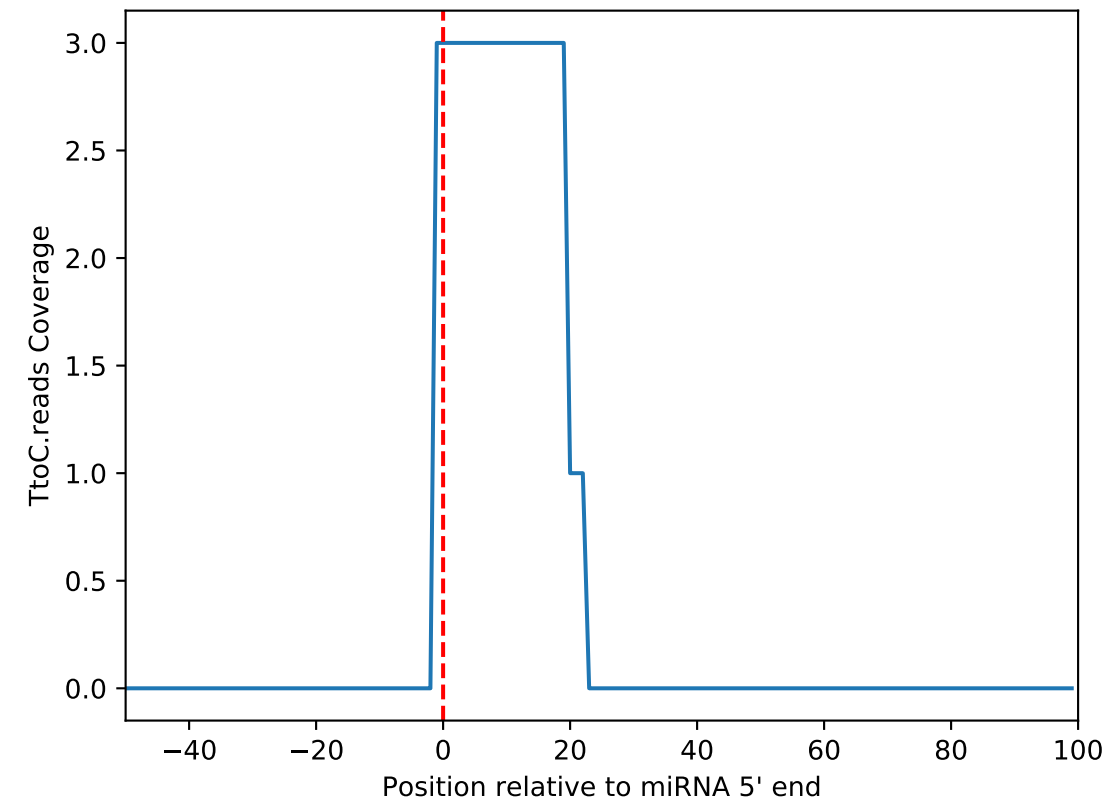

mir-973 (chrX:19551546(+))

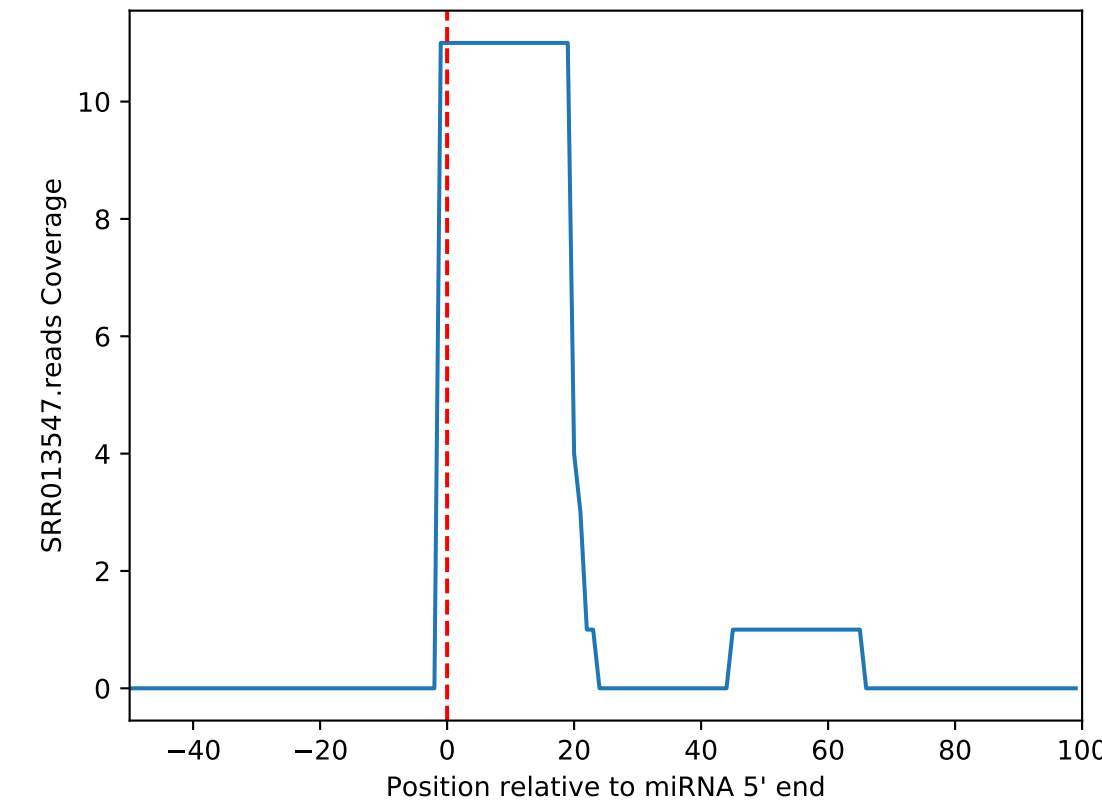

mir-973 (chrX:19551546(+))



mir-985 (chrX:16191324(-))

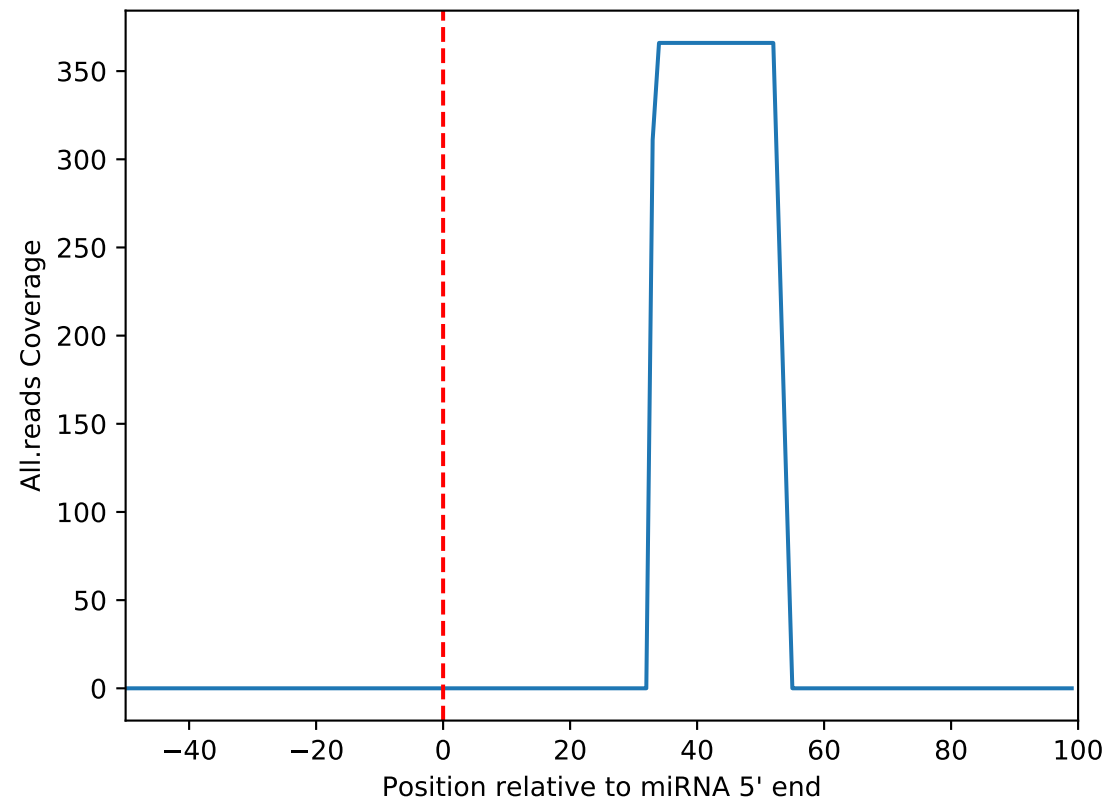

mir-985 (chrX:16191324(-))

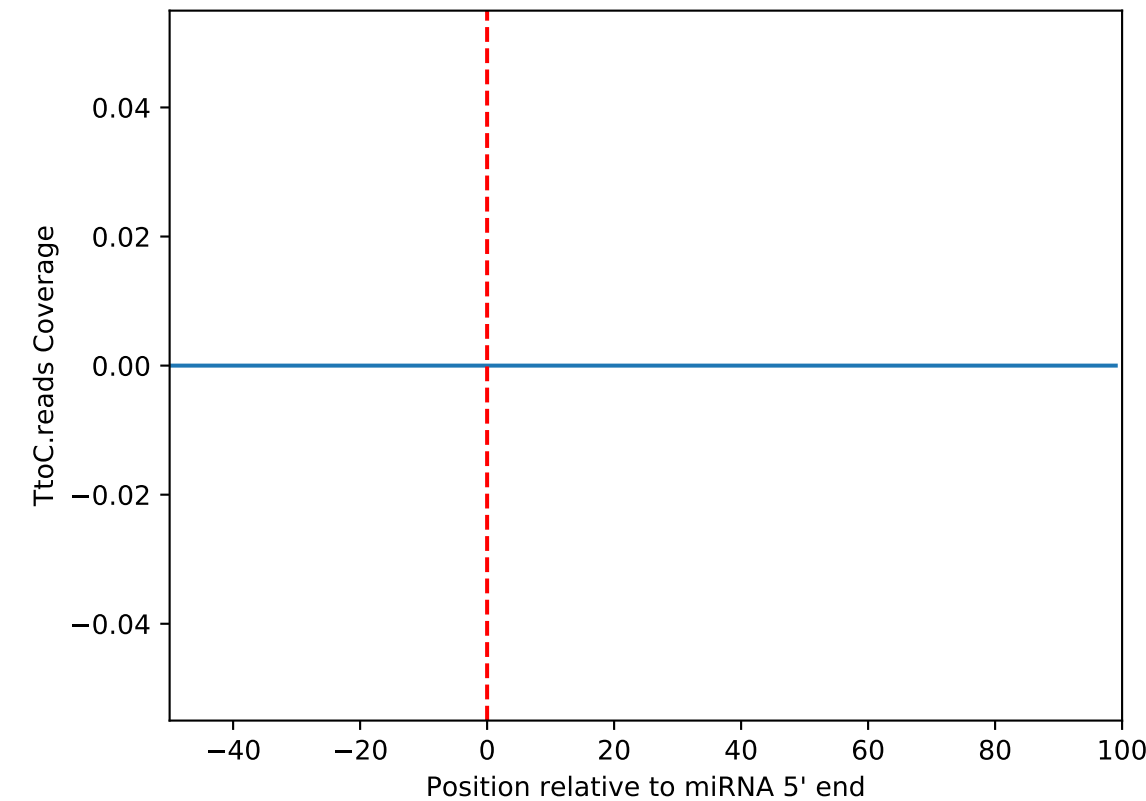

mir-985 (chrX:16191324(-))

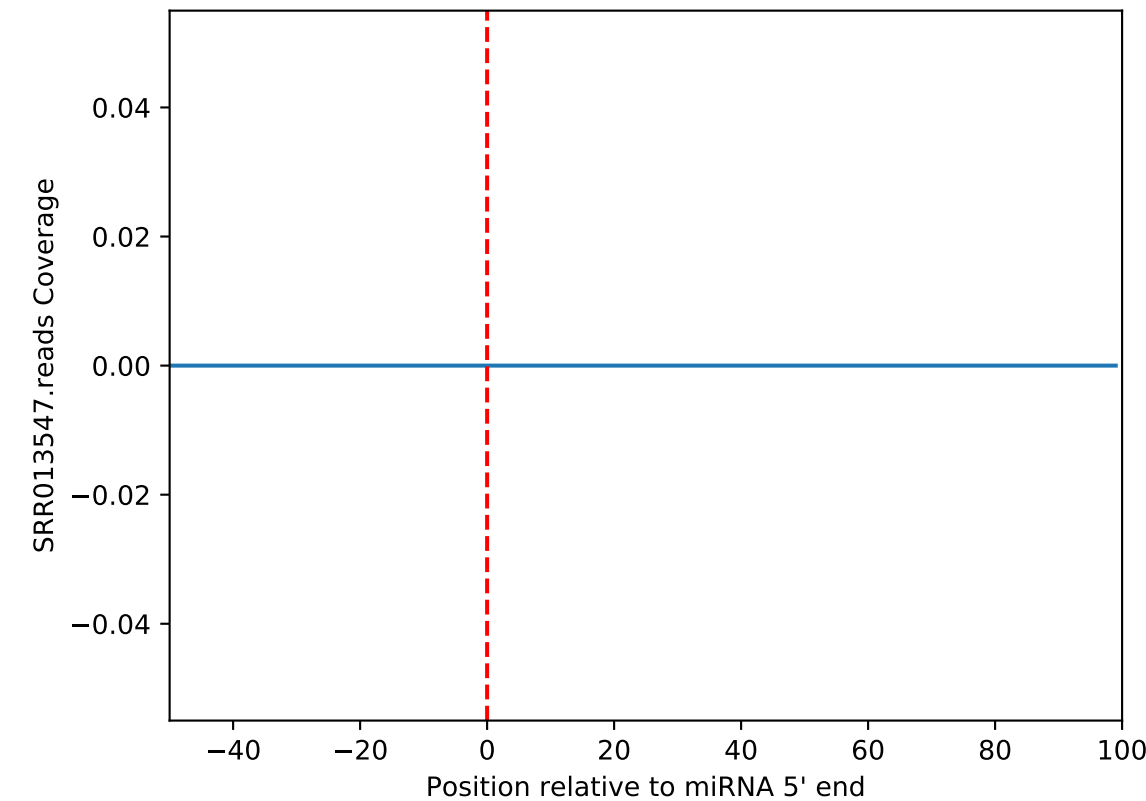

mir-985 (chrX:16191324(-))

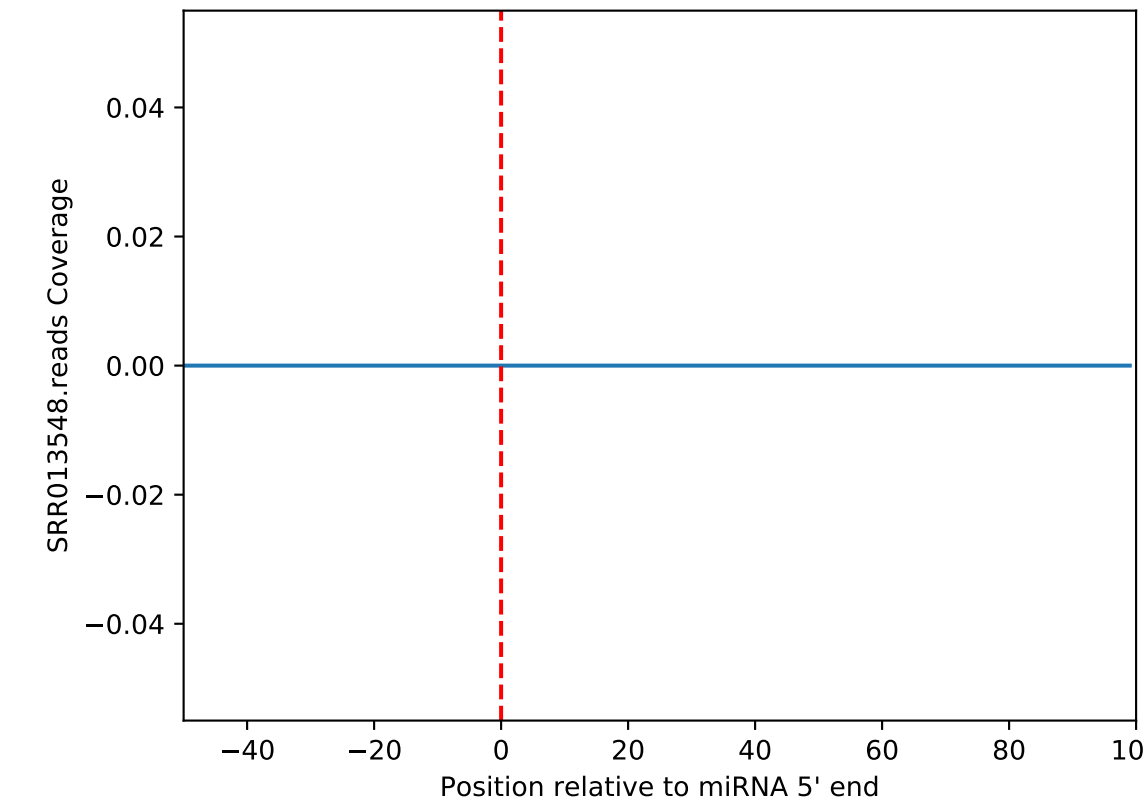

mir-313 (chr2R:20584254(-))

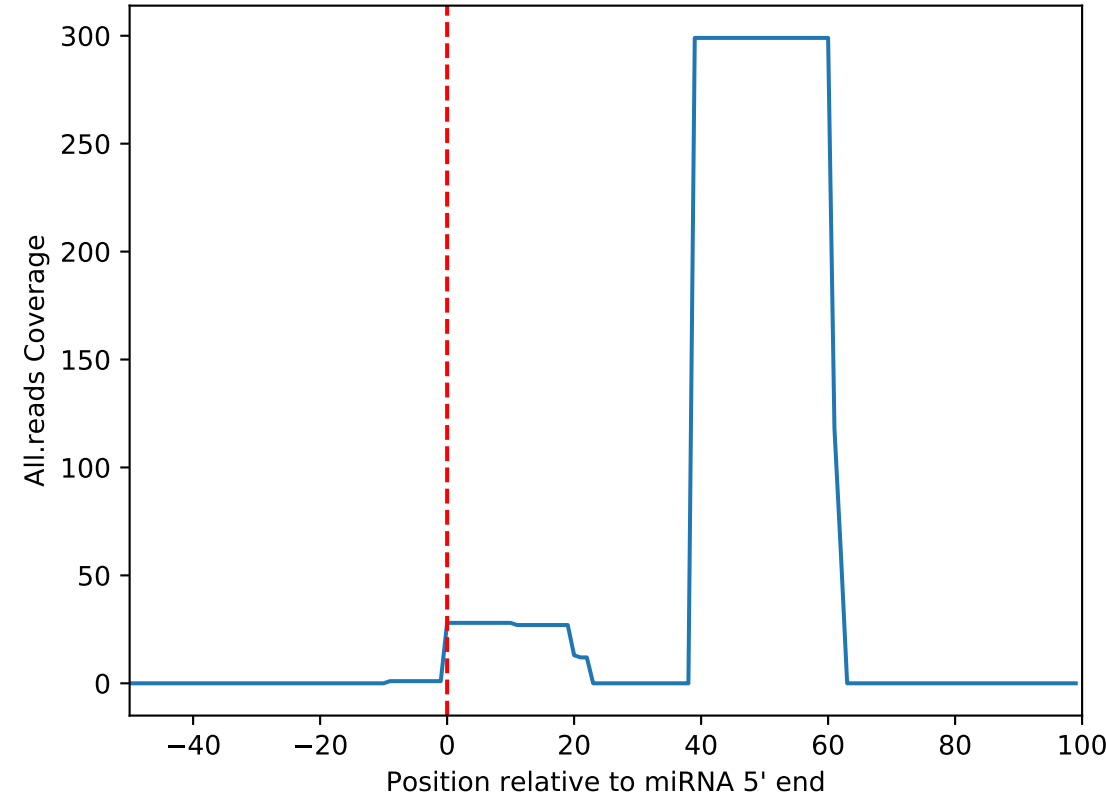

mir-313 (chr2R:20584254(-))

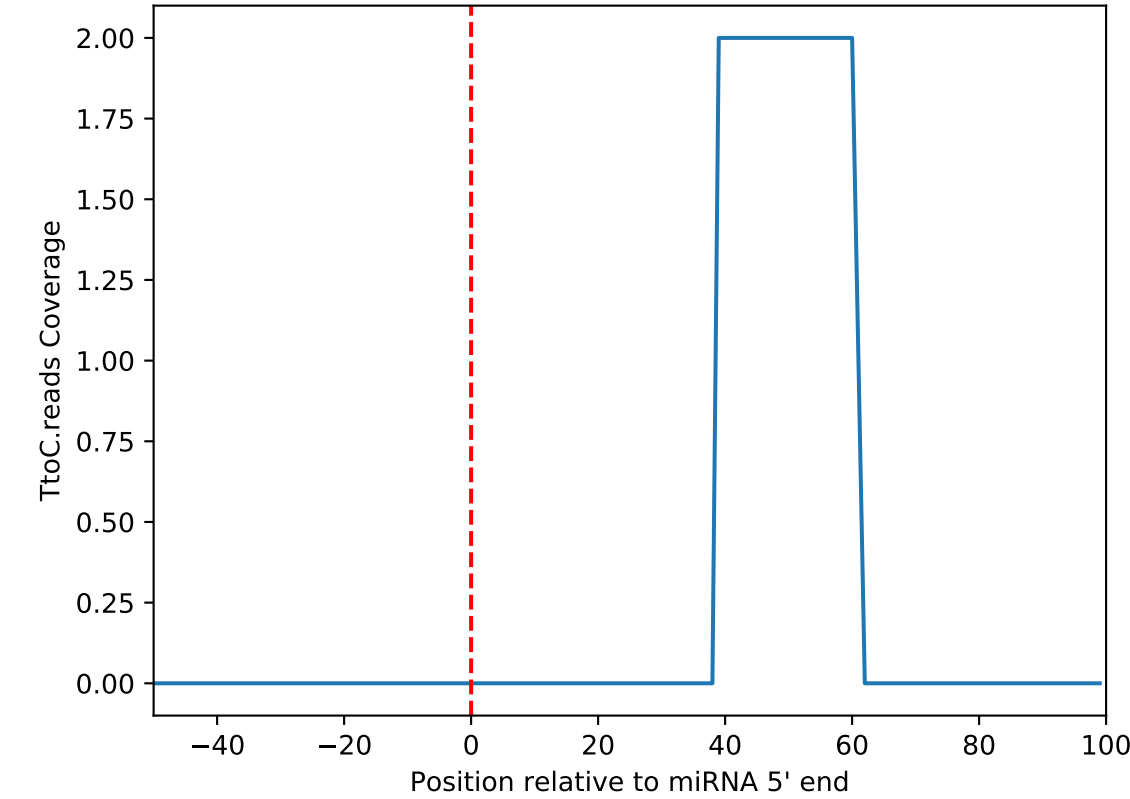

mir-313 (chr2R:20584254(-))

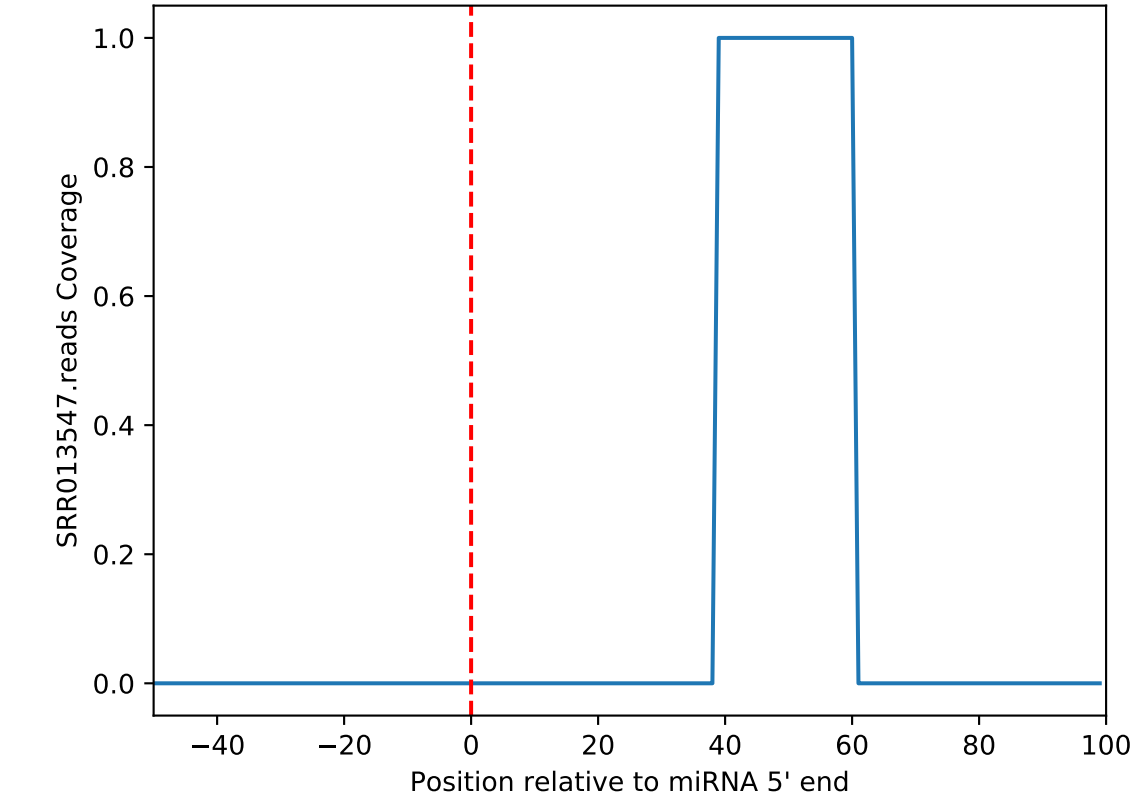

mir-313 (chr2R:20584254(-))



mir-4966 (chrX:19558402(+))

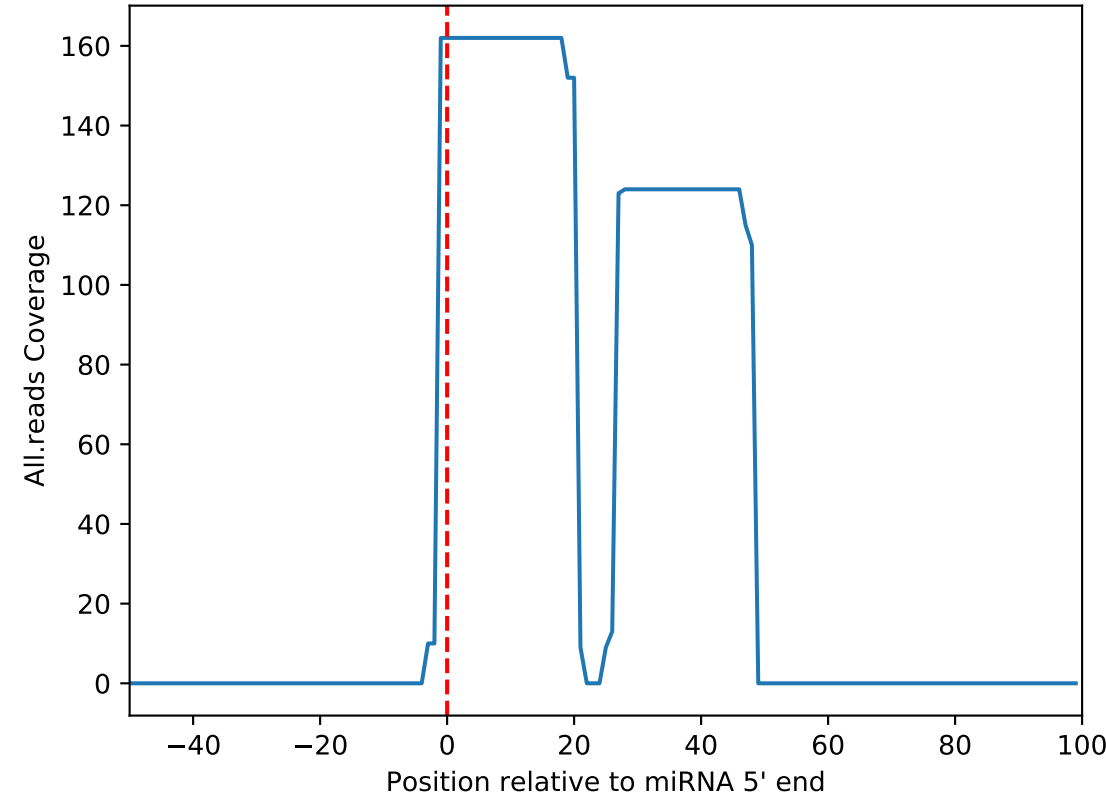

mir-4966 (chrX:19558402(+))

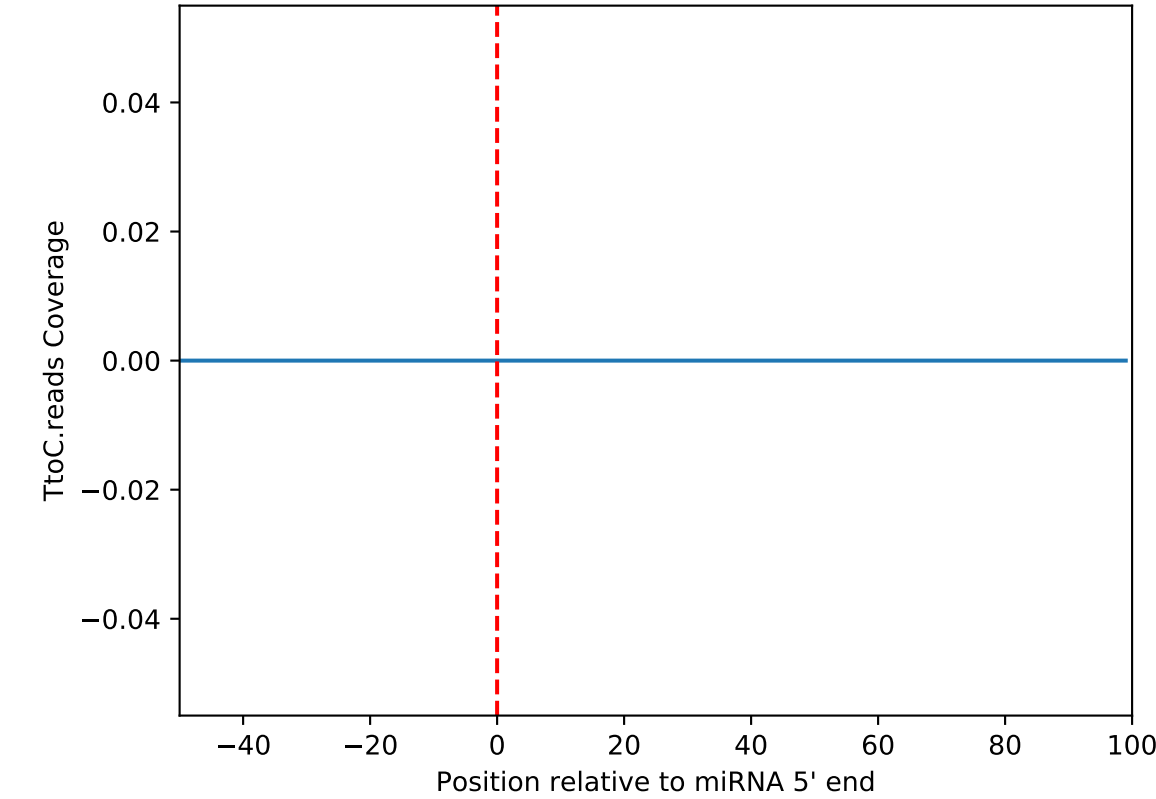

mir-4966 (chrX:19558402(+))

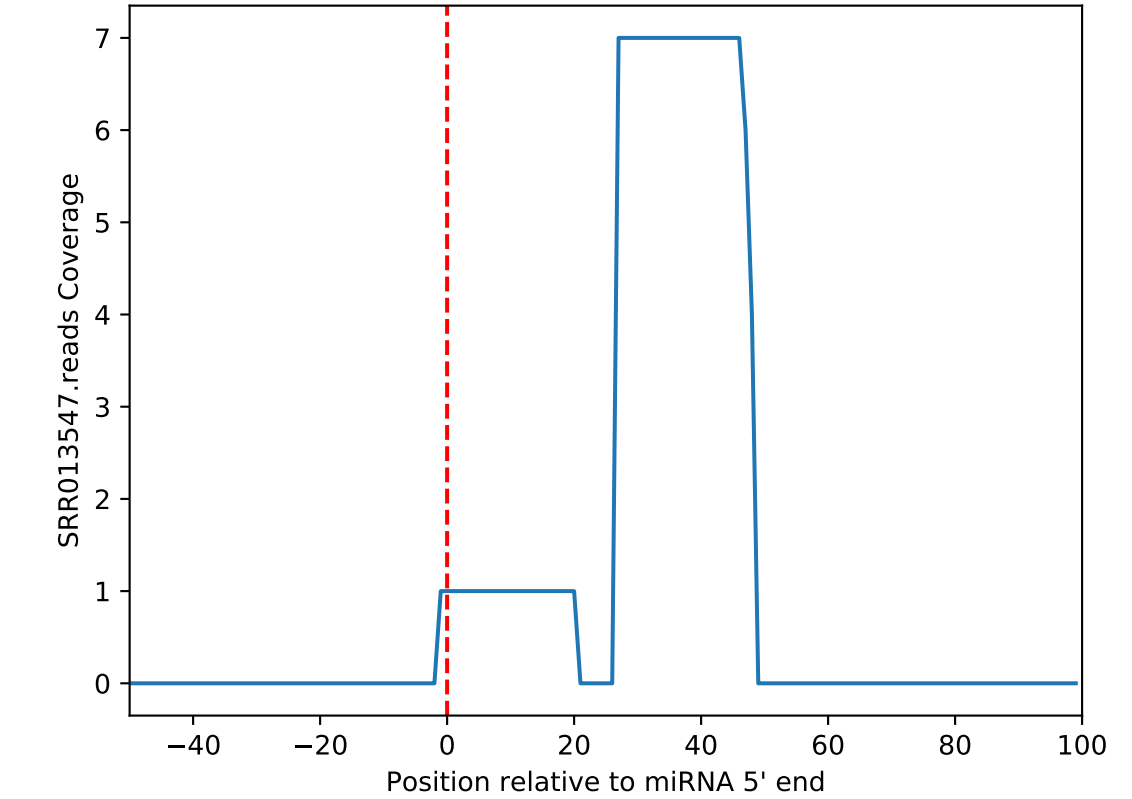

mir-4966 (chrX:19558402(+))



mir-1003 (chr3R:24658606(+))

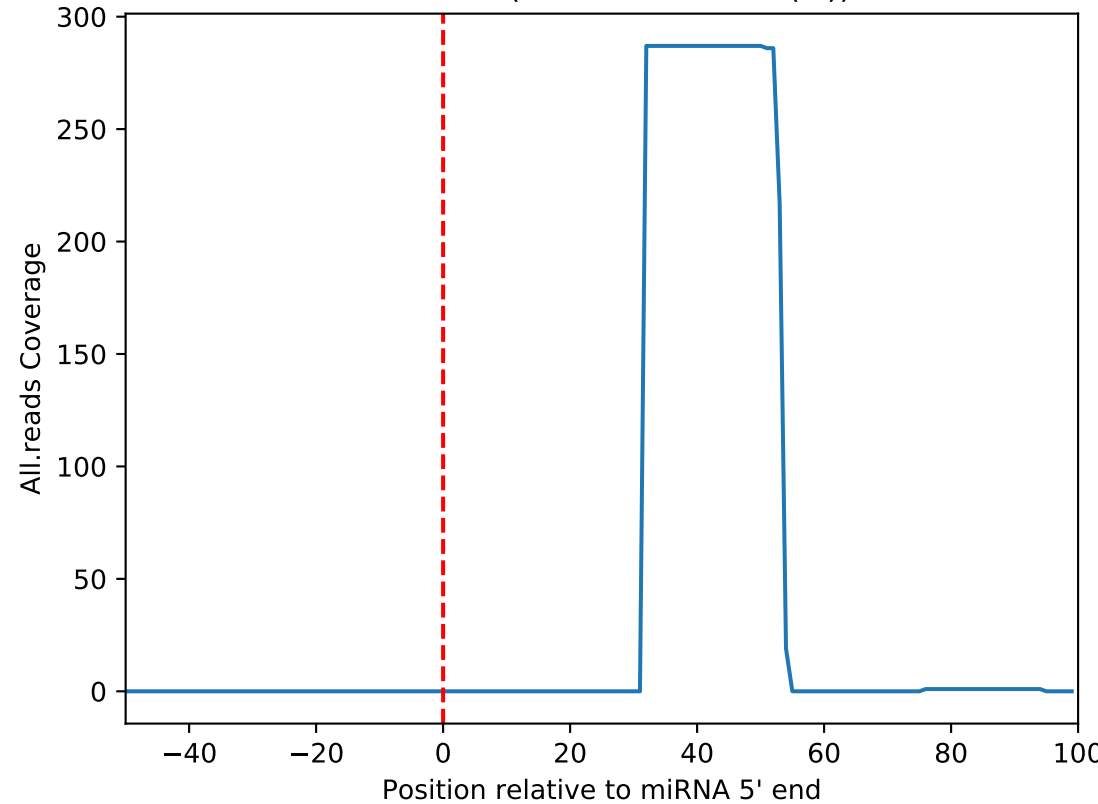

mir-1003 (chr3R:24658606(+))

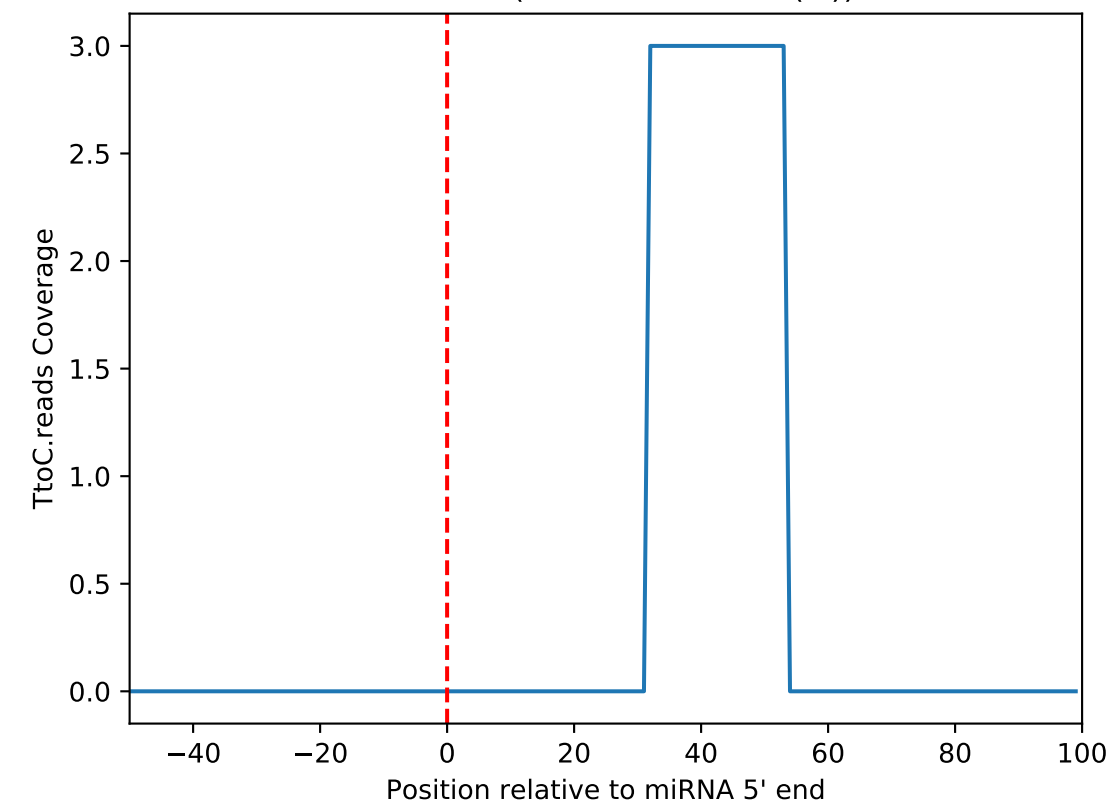

mir-1003 (chr3R:24658606(+))

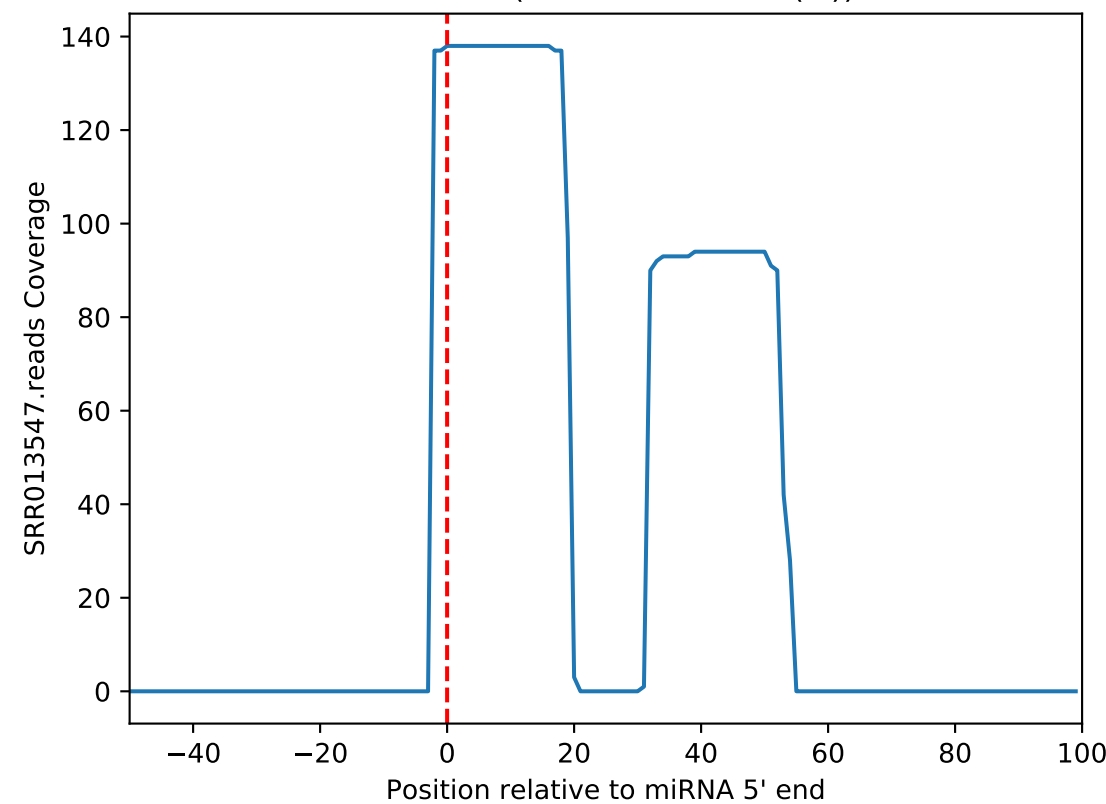

mir-1003 (chr3R:24658606(+))

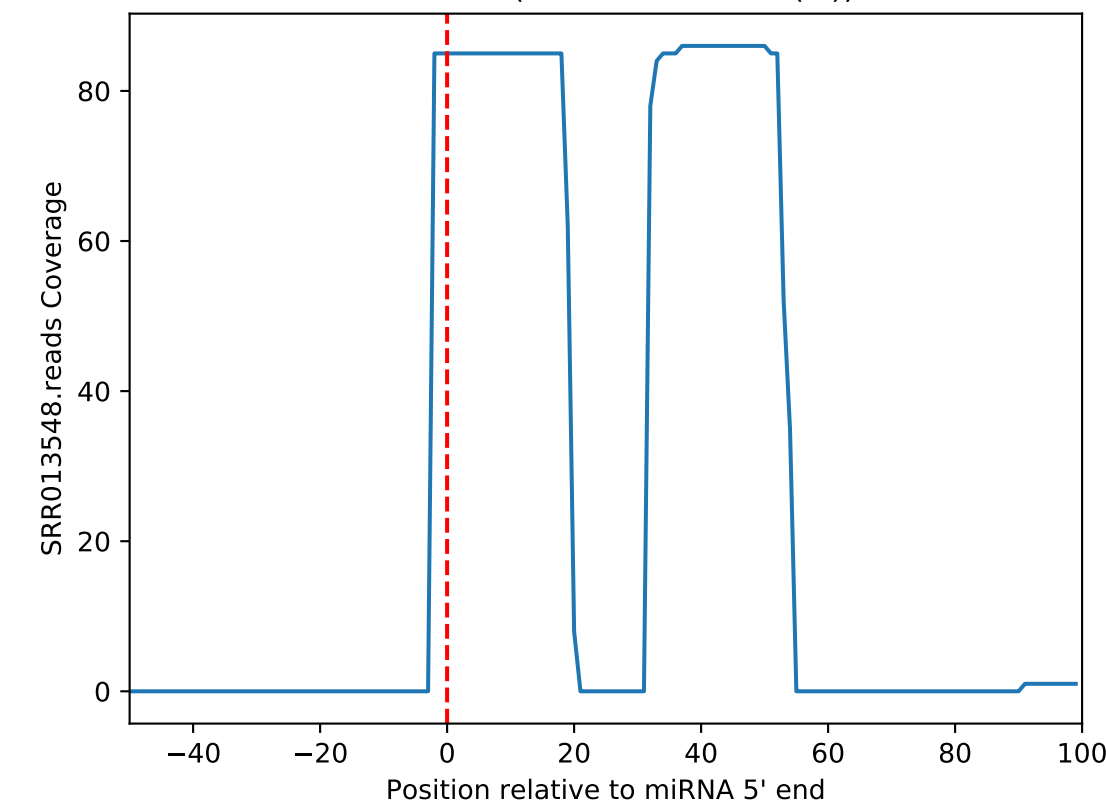

mir-986 (chr2R:8445000(+))

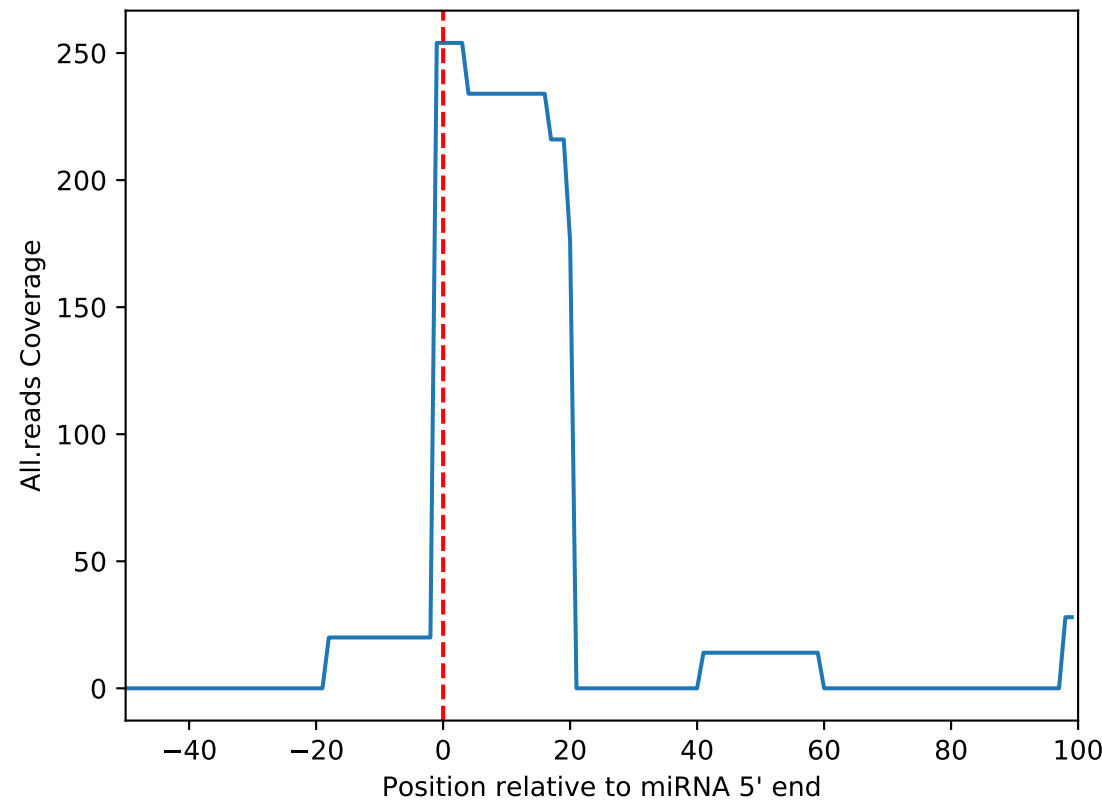

mir-986 (chr2R:8445000(+))

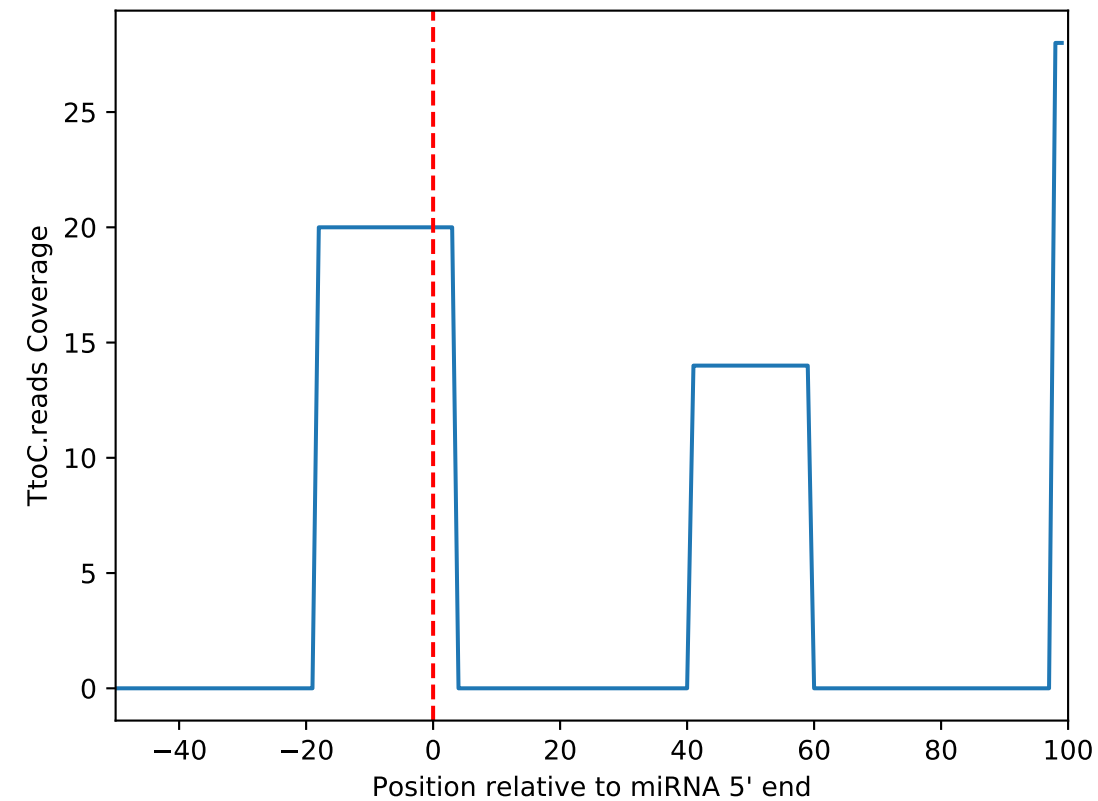

mir-986 (chr2R:8445000(+))

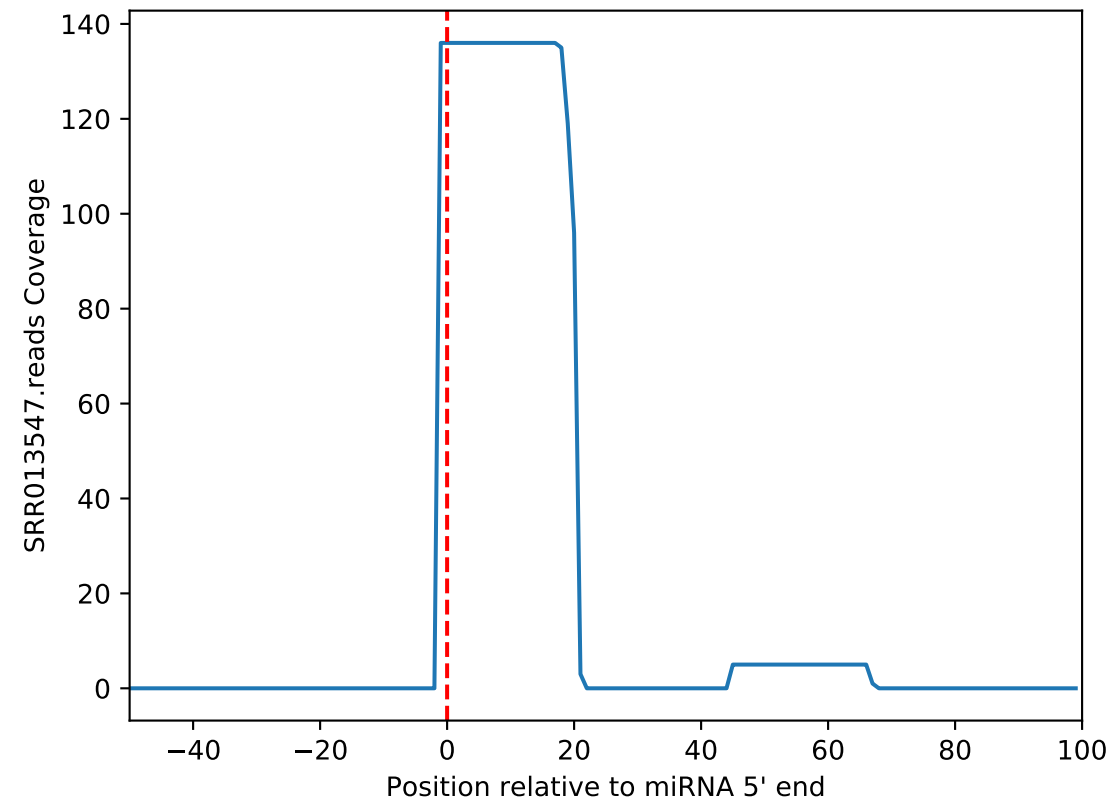

mir-986 (chr2R:8445000(+))

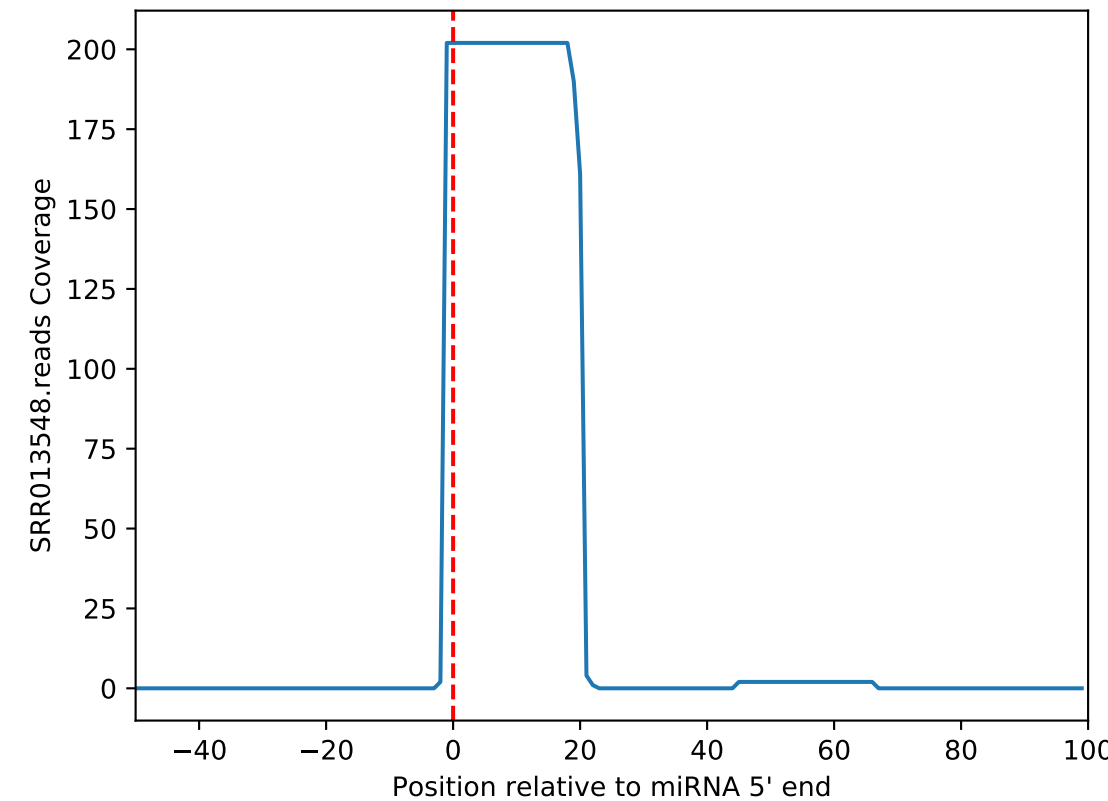

mir-283 (chrX:15507976(+))

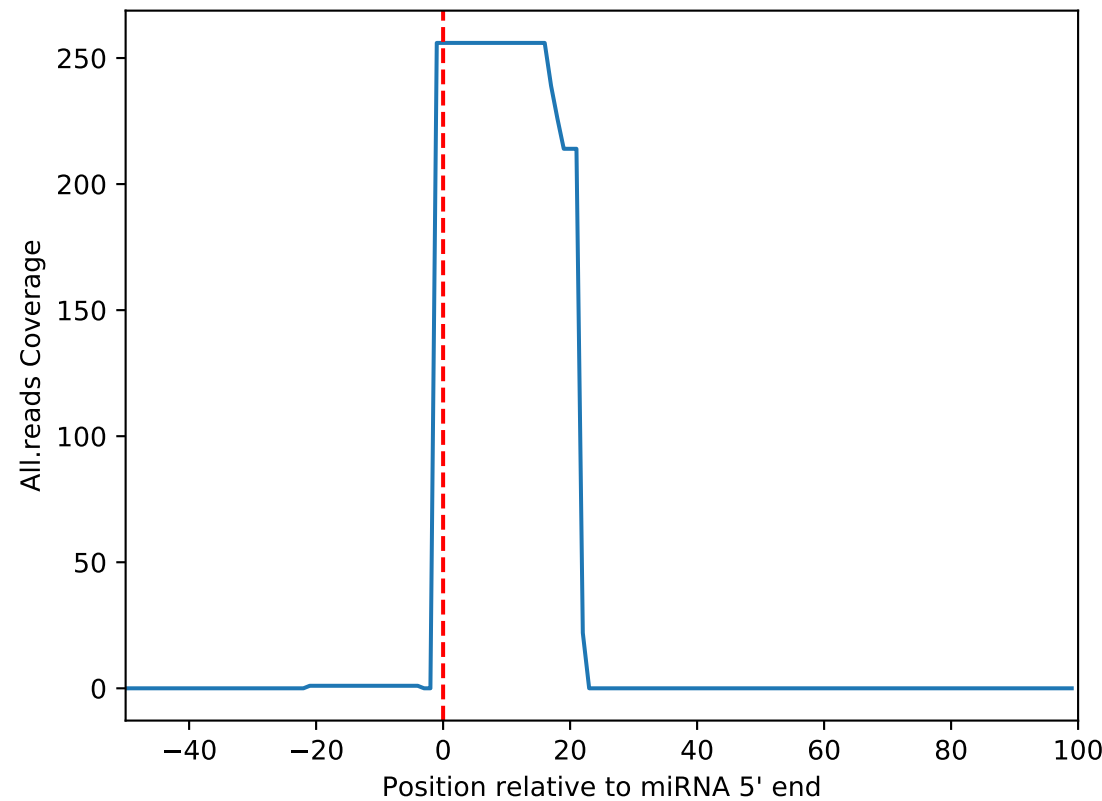

mir-283 (chrX:15507976(+))

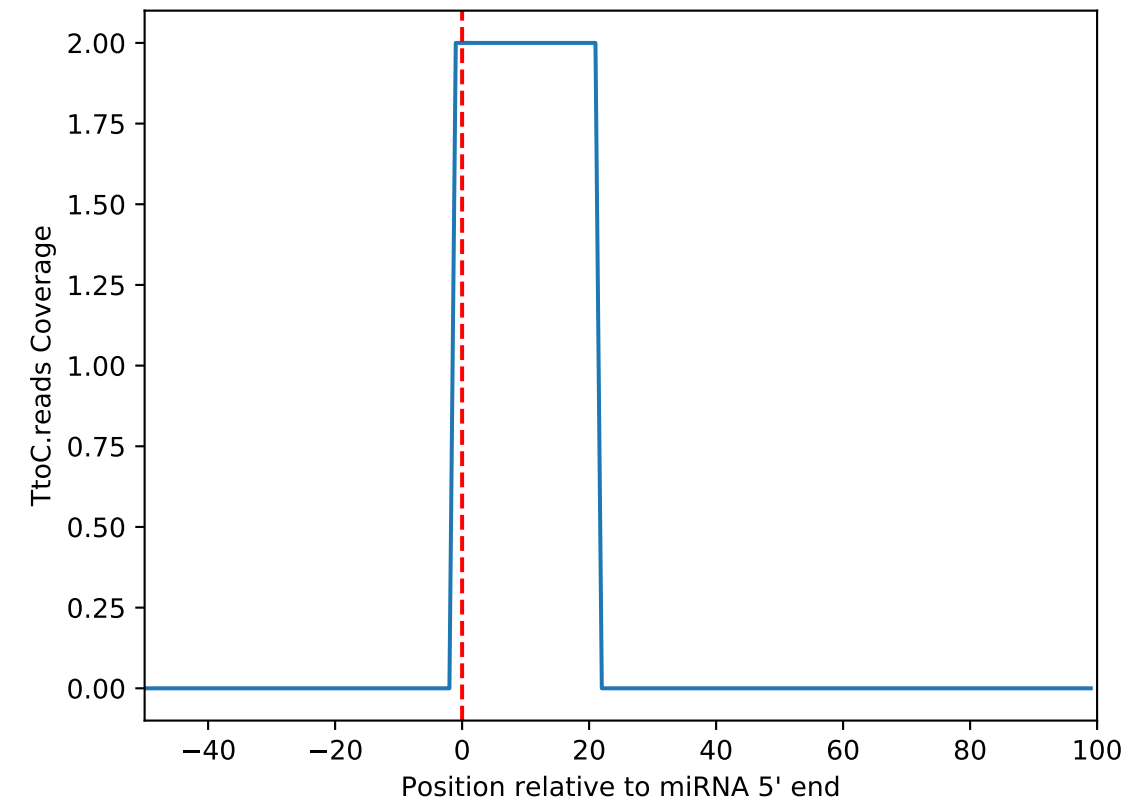

mir-283 (chrX:15507976(+))

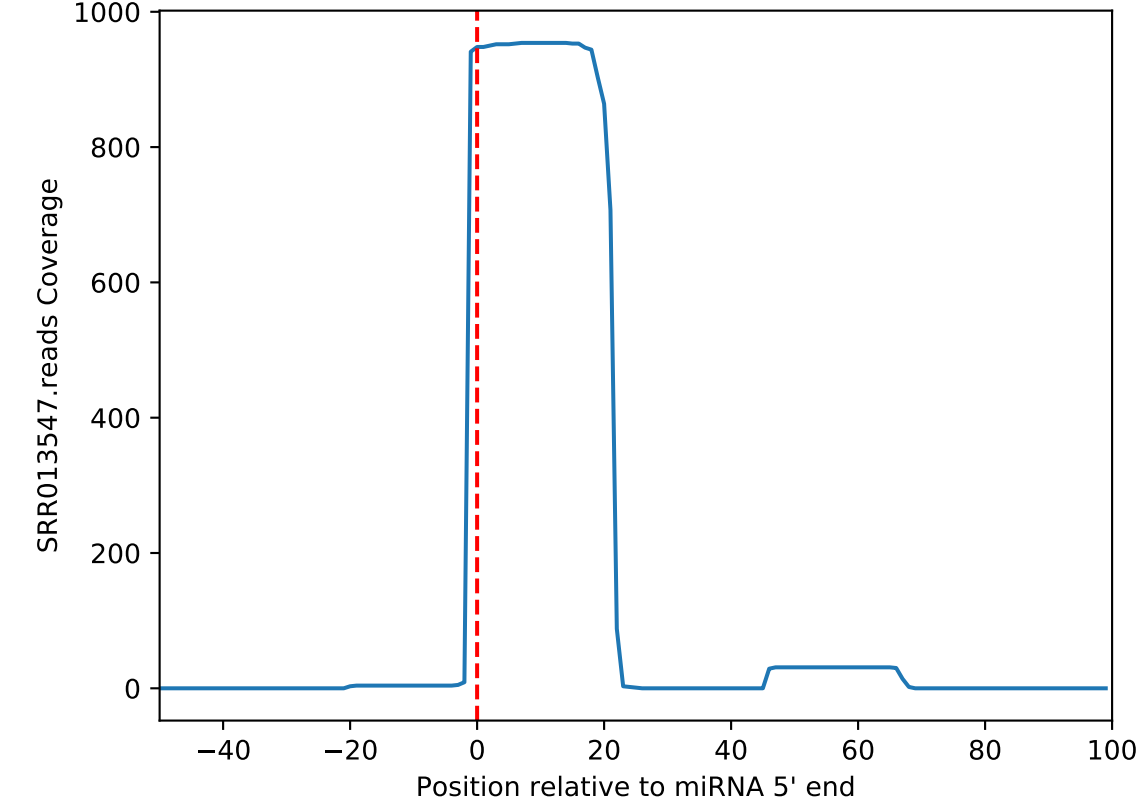

mir-283 (chrX:15507976(+))

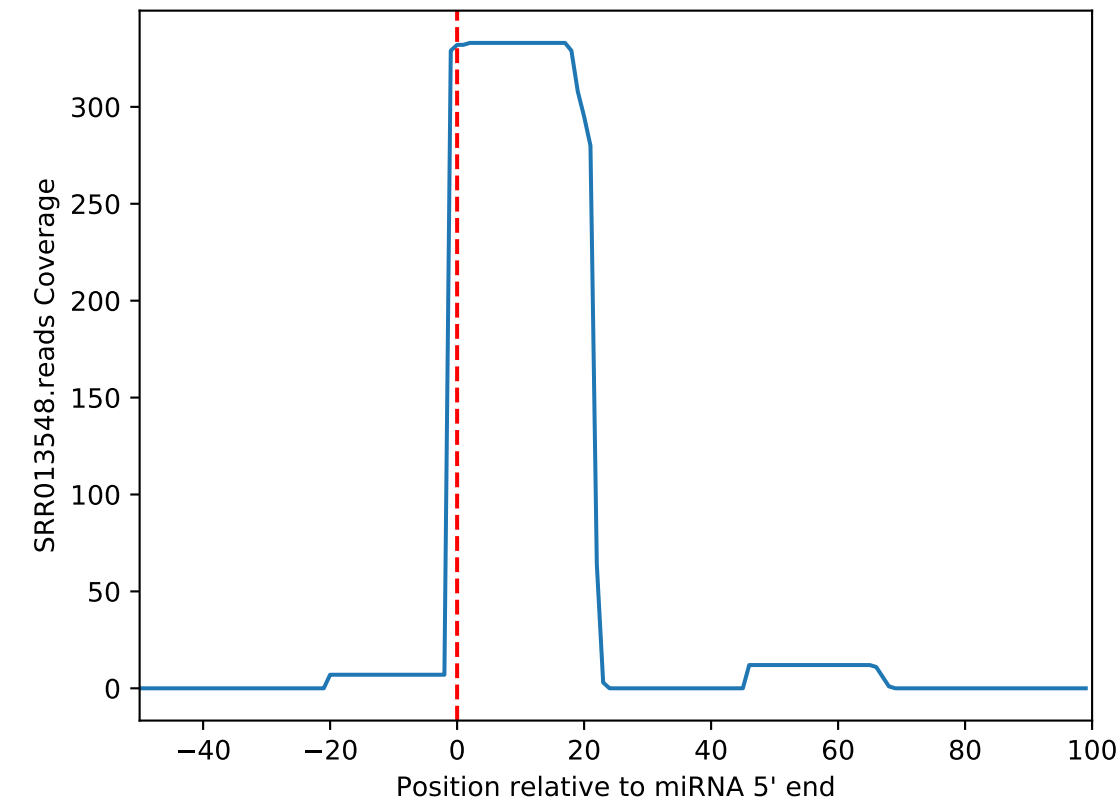

mir-1012 (chr3R:26861406(-))

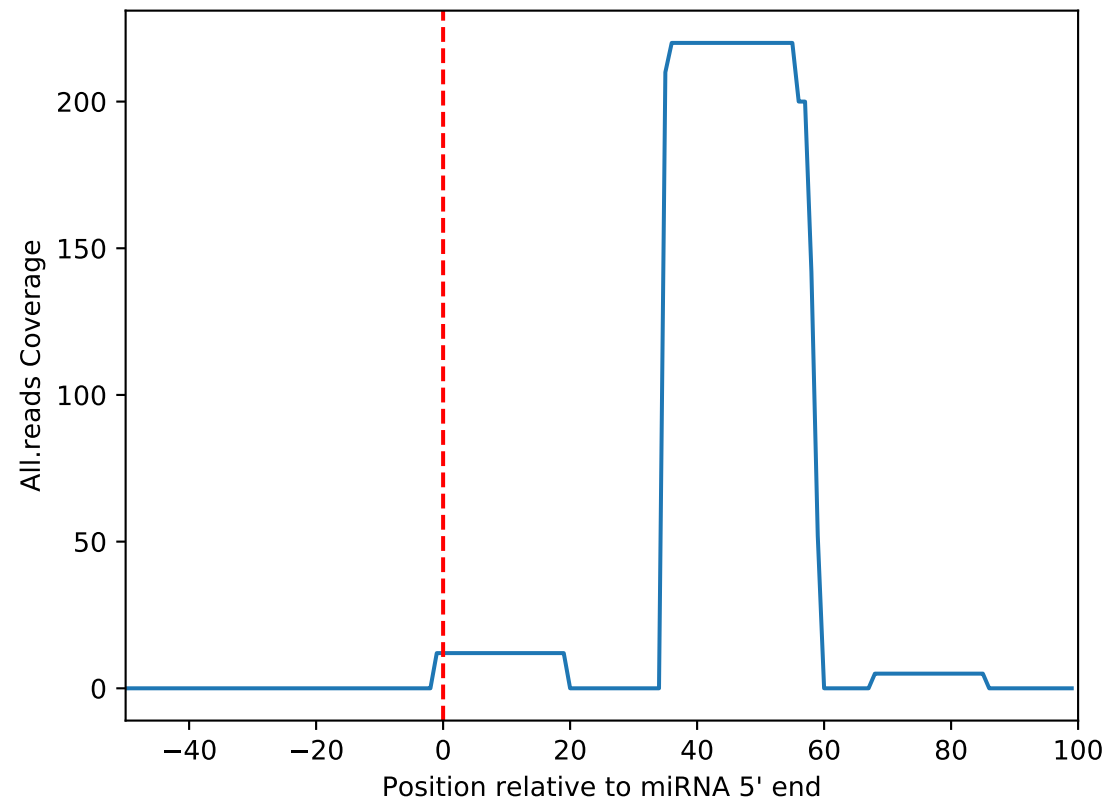

mir-1012 (chr3R:26861406(-))

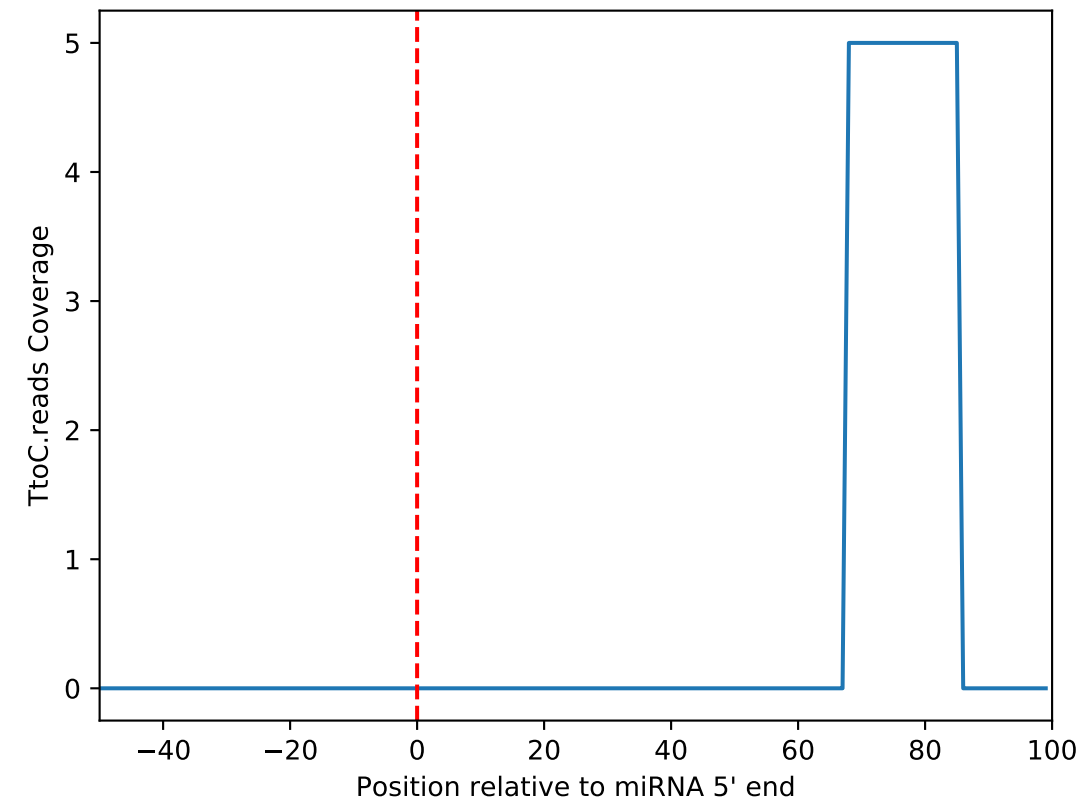

mir-1012 (chr3R:26861406(-))

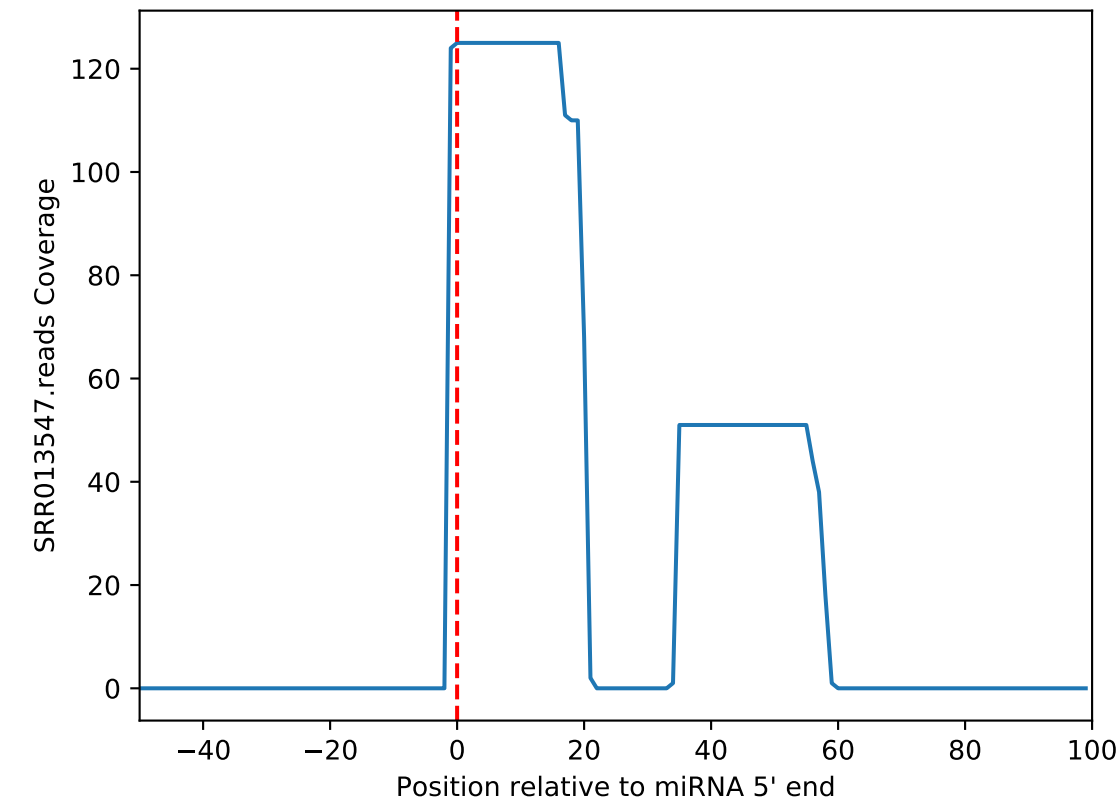

mir-1012 (chr3R:26861406(-))

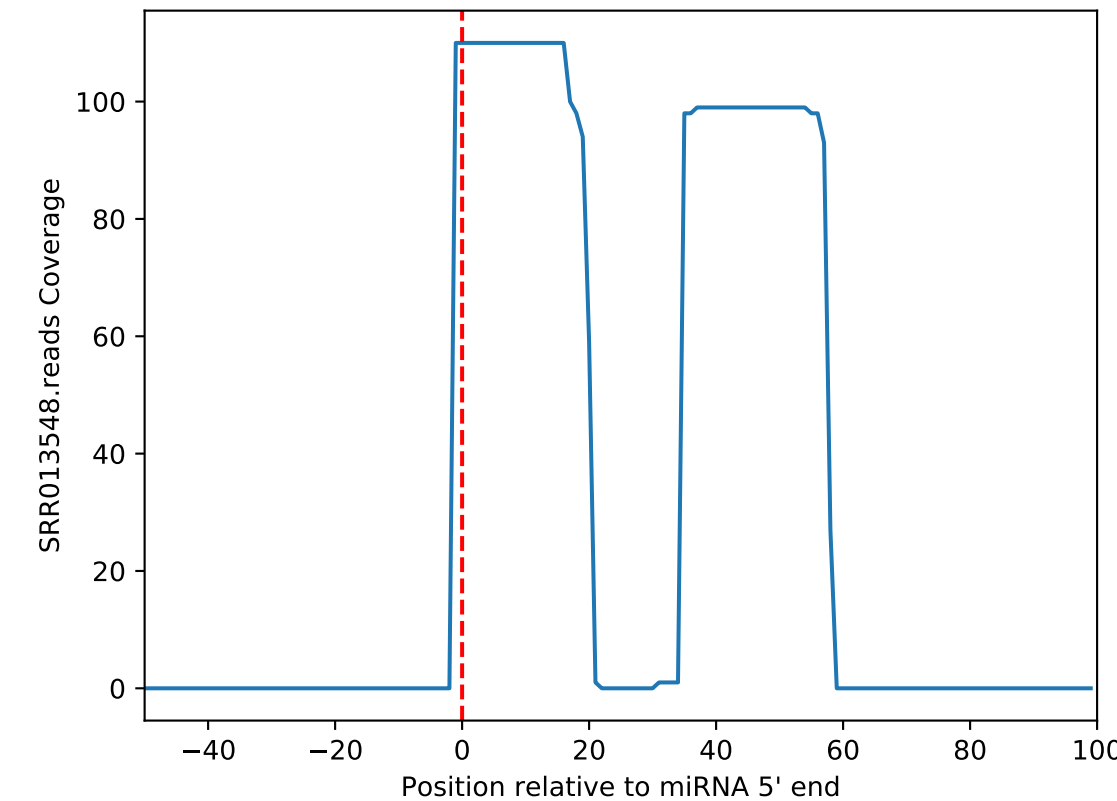



mir-988 (chr2R:12158945(-))

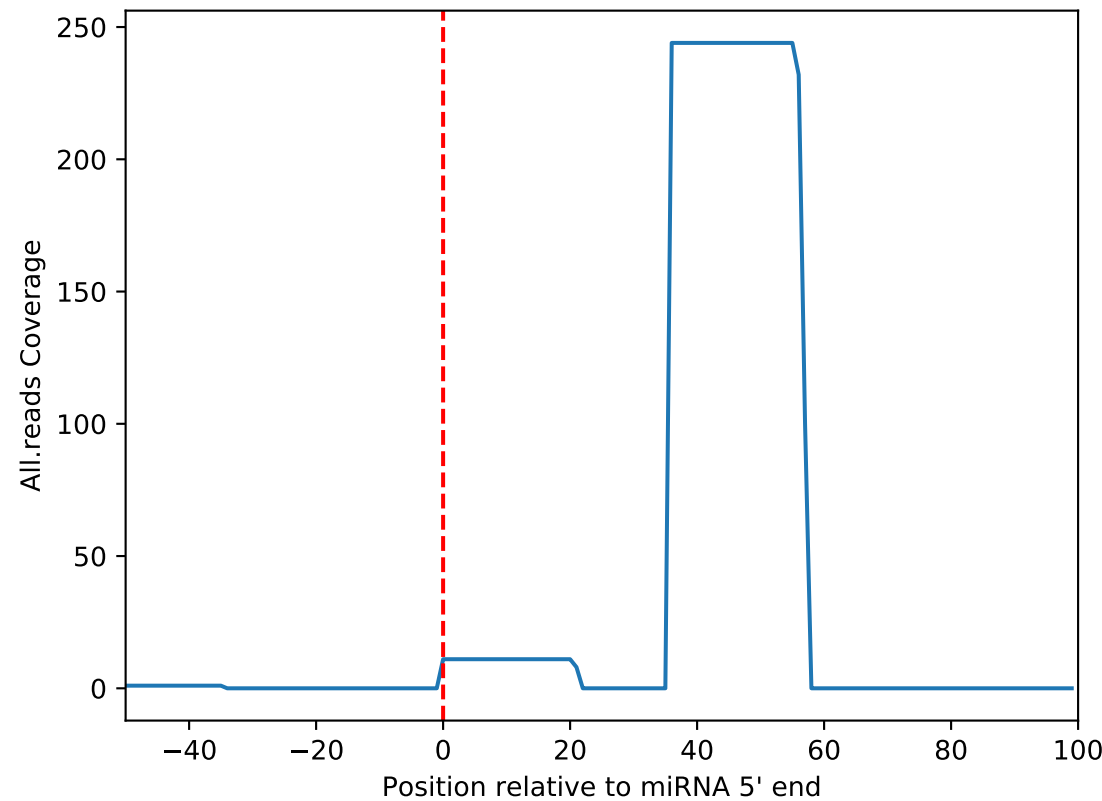

mir-988 (chr2R:12158945(-))

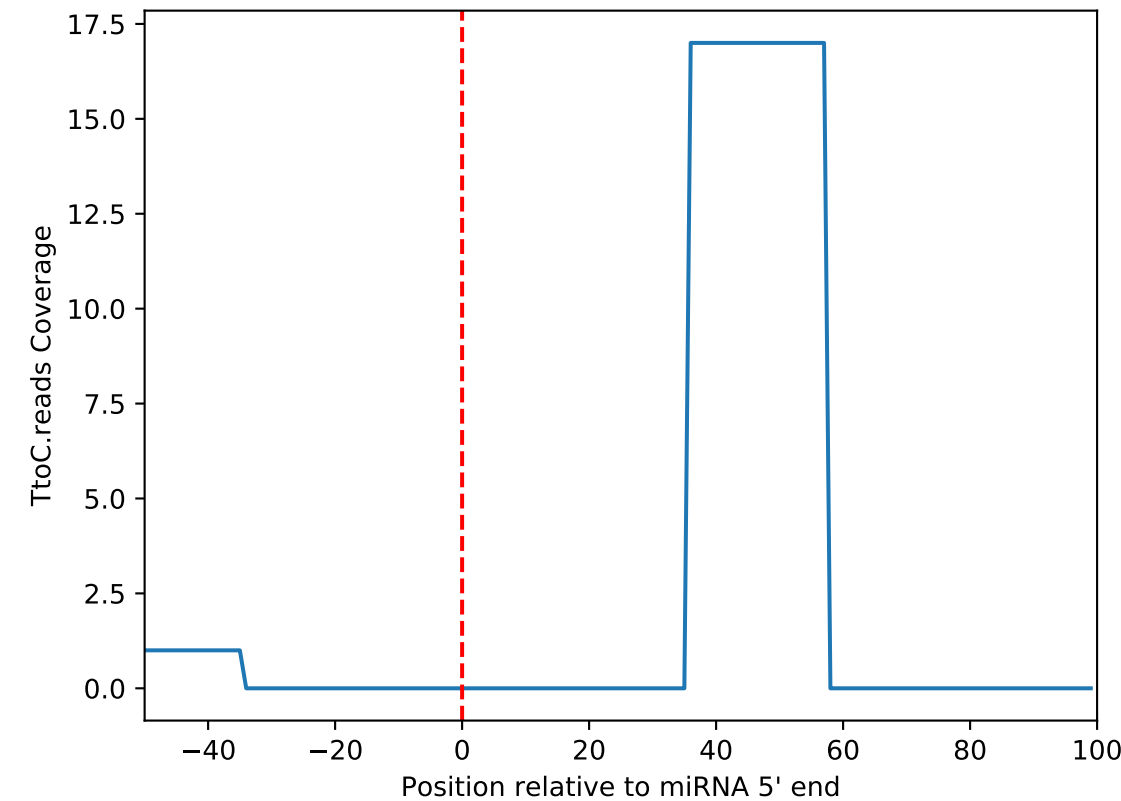

mir-988 (chr2R:12158945(-))

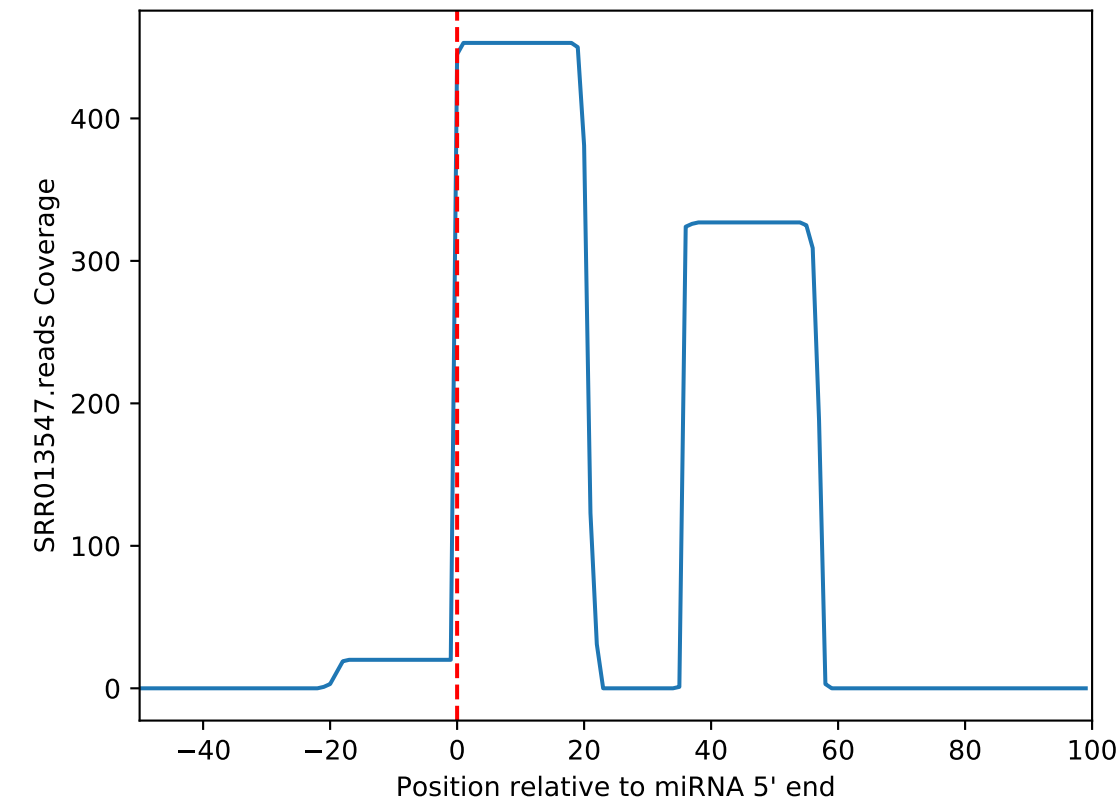

mir-988 (chr2R:12158945(-))

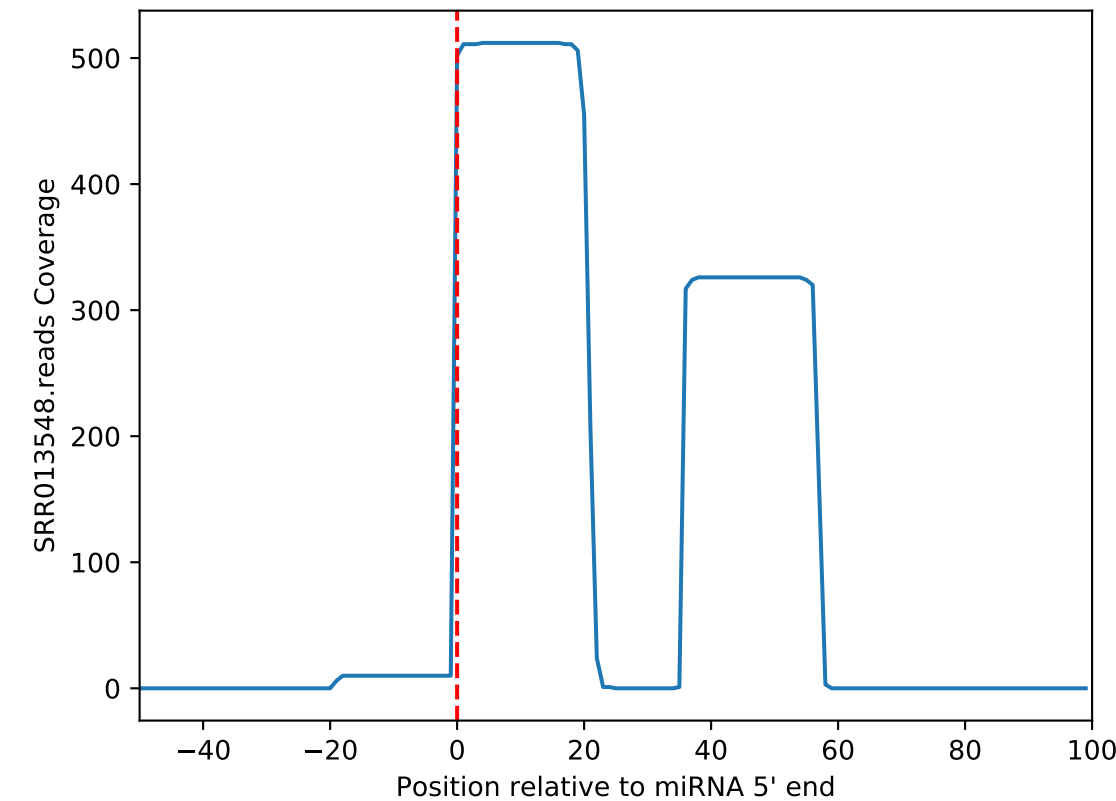

mir-1010 (chr3R:22292879(+))

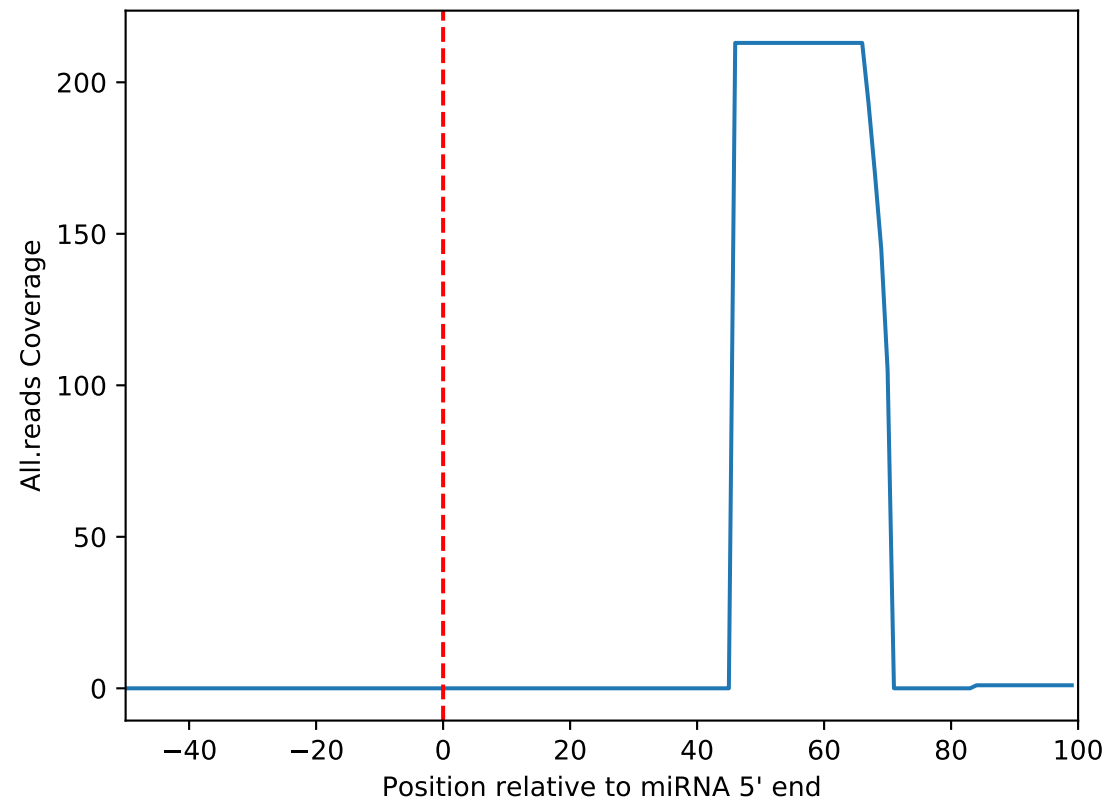

mir-1010 (chr3R:22292879(+))

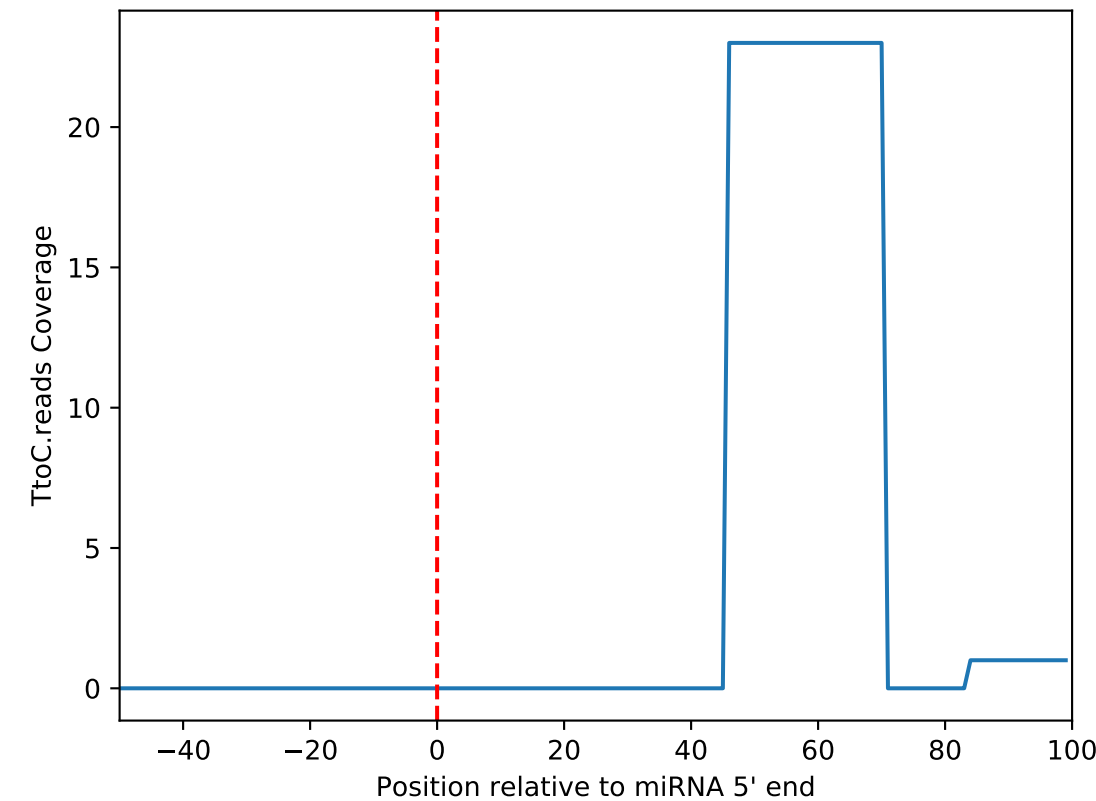

mir-1010 (chr3R:22292879(+))

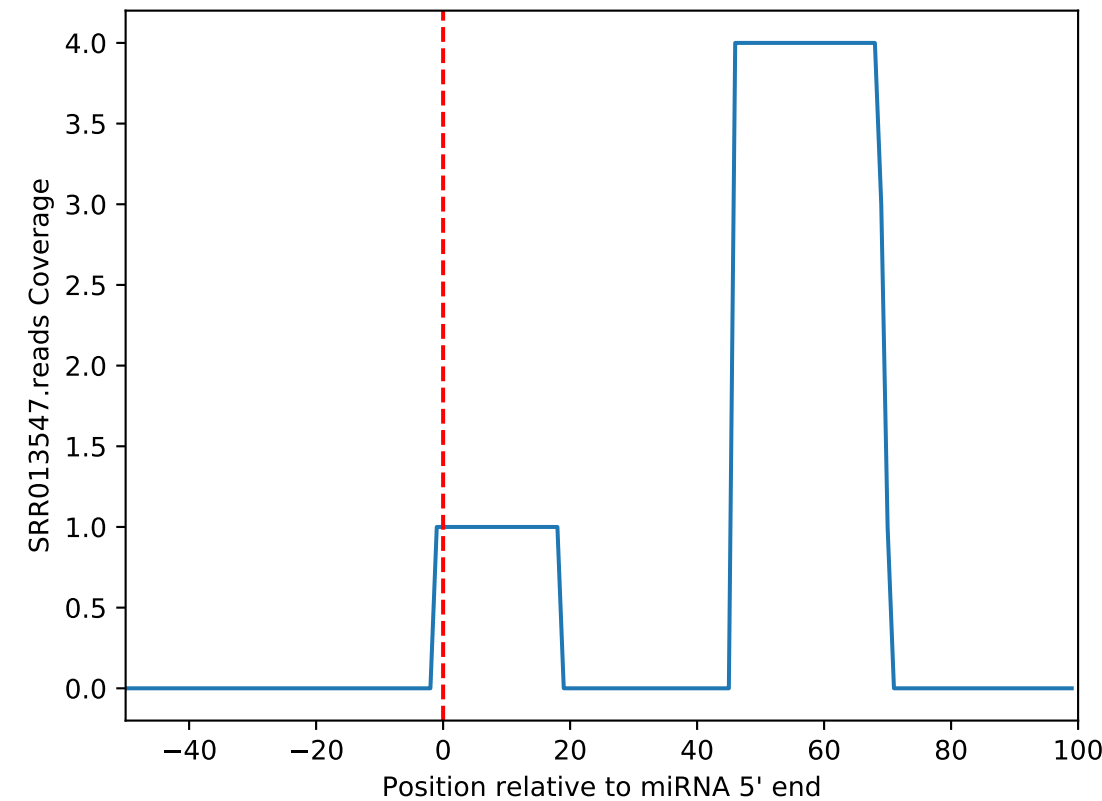

mir-1010 (chr3R:22292879(+))

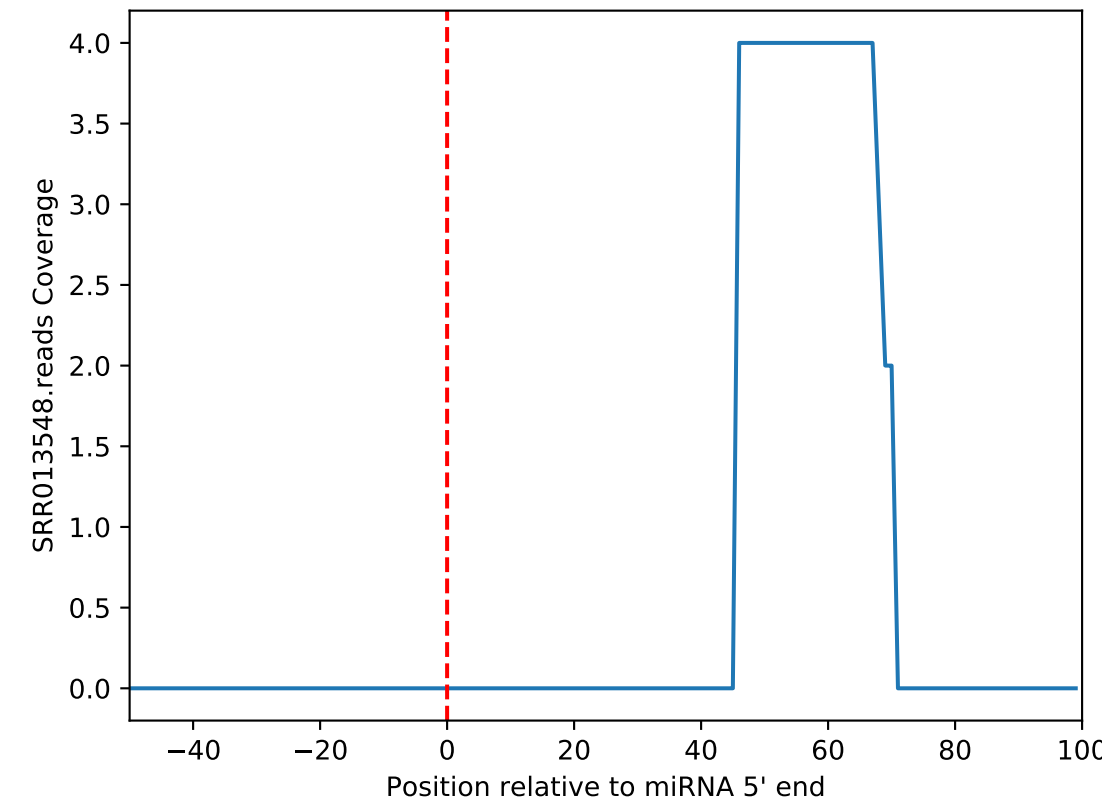

mir-100 (chr2L:18471445(+))

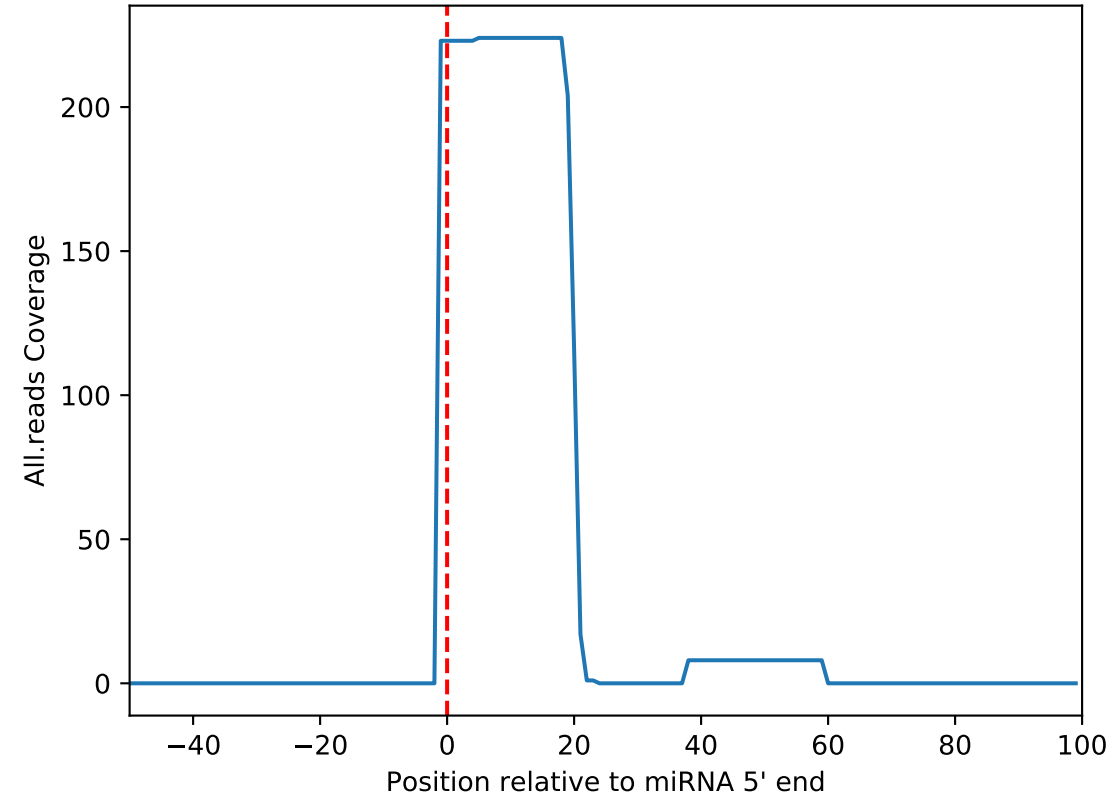

mir-100 (chr2L:18471445(+))

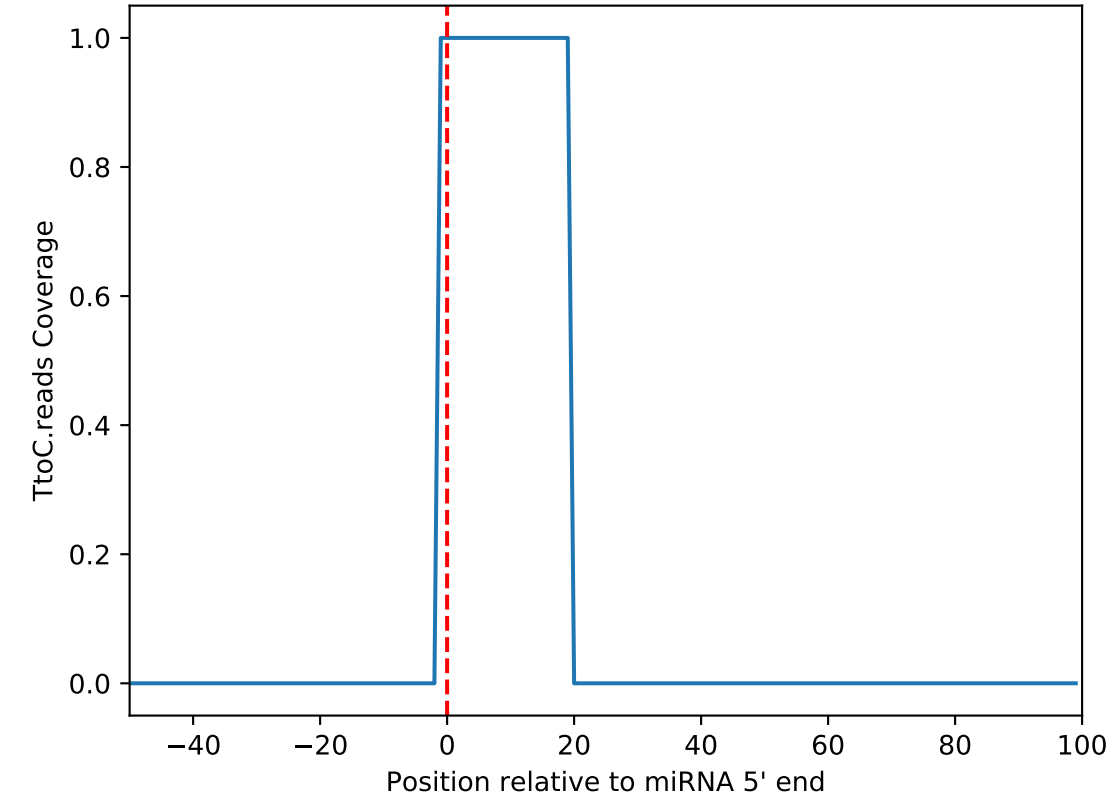

mir-100 (chr2L:18471445(+))

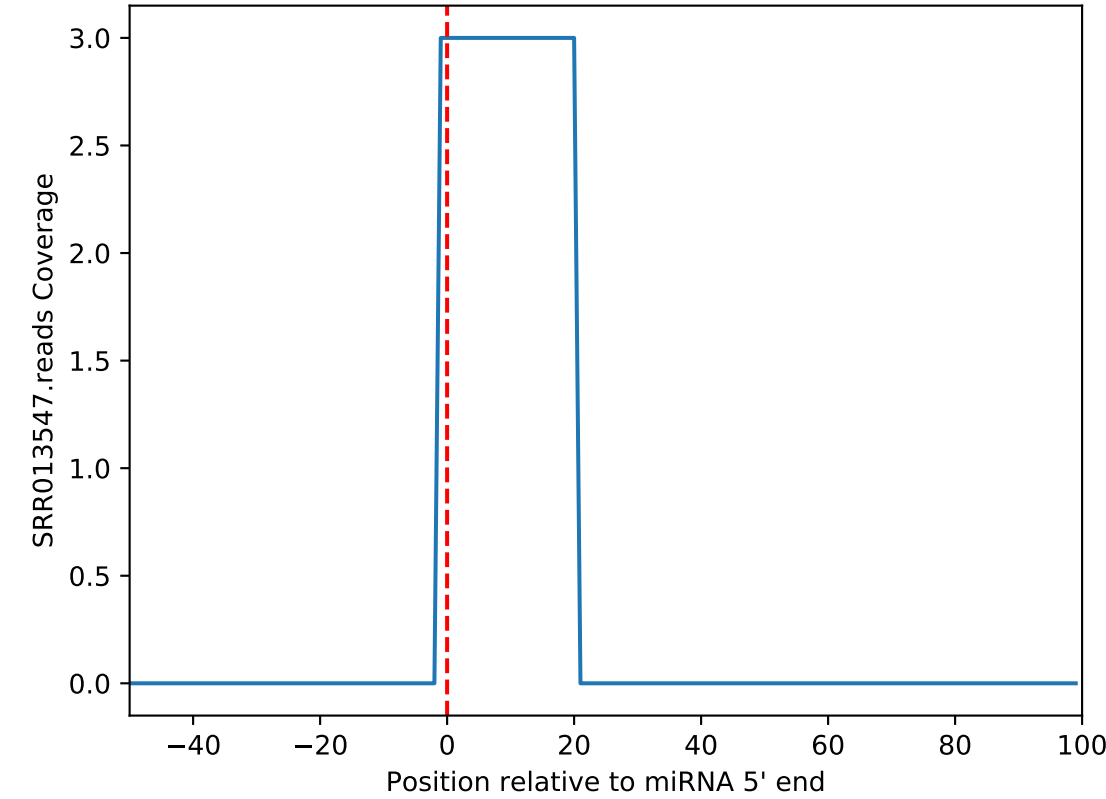

mir-100 (chr2L:18471445(+))

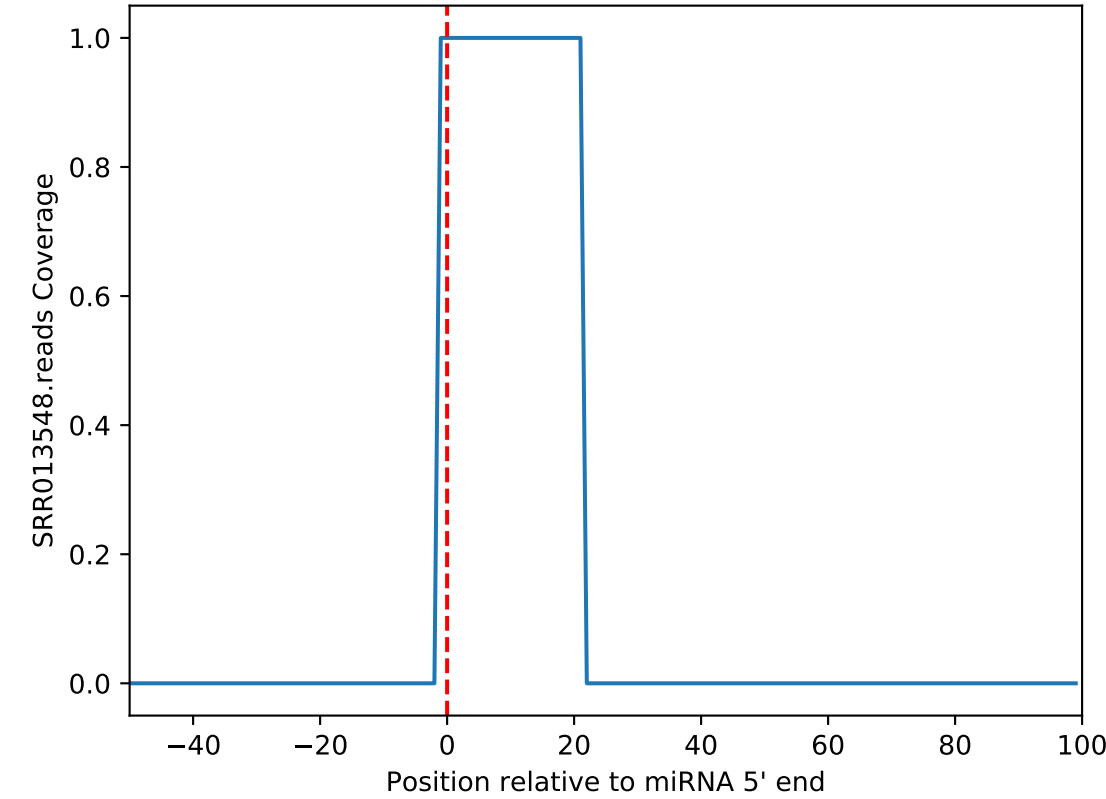

mir-992 (chr2R:20585390(-))

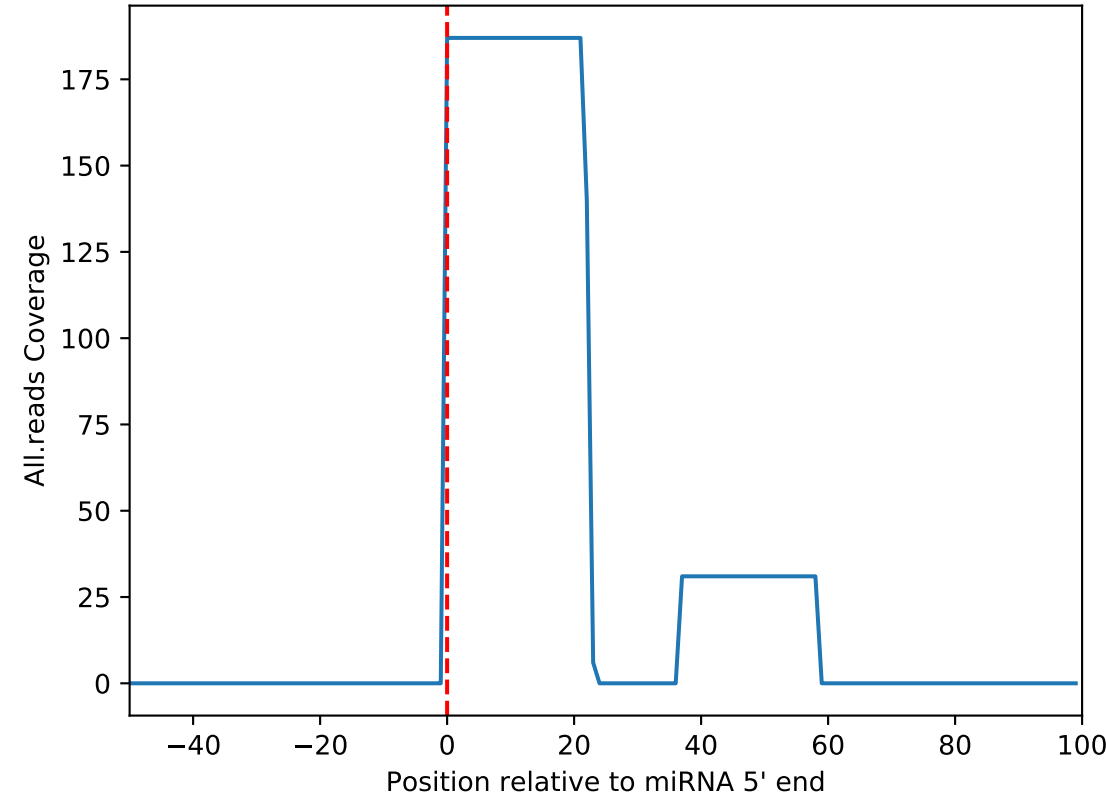

mir-992 (chr2R:20585390(-))

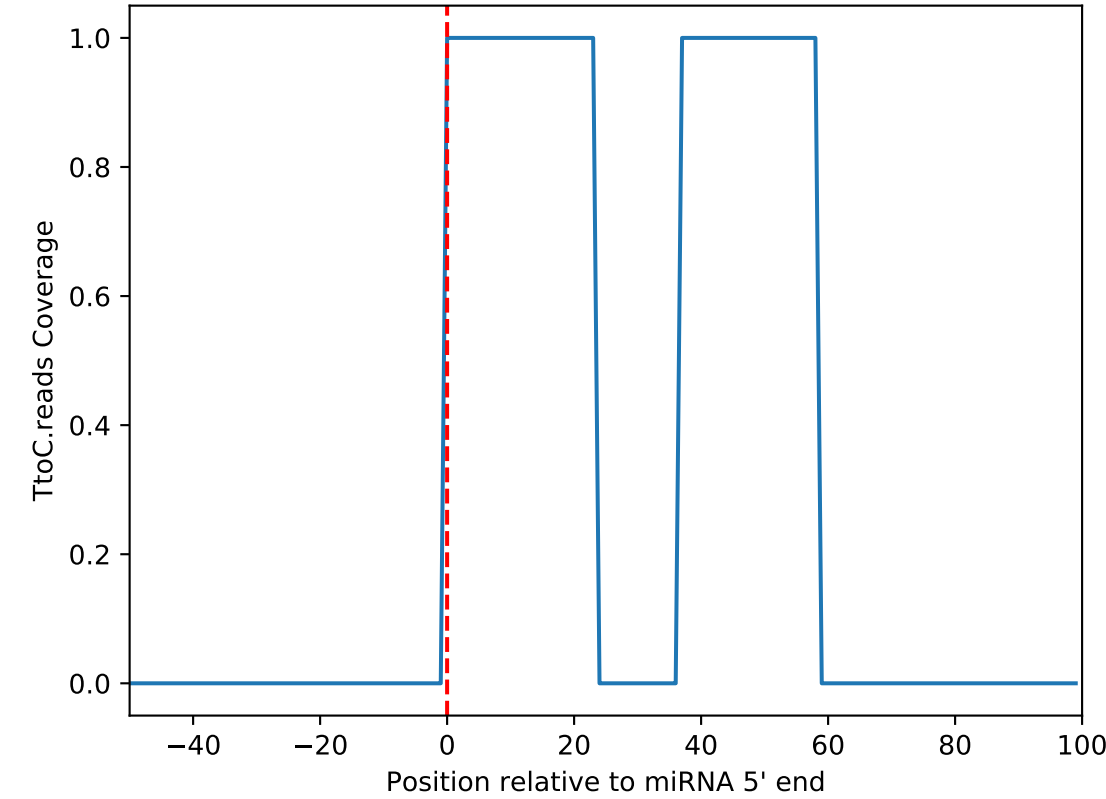

mir-992 (chr2R:20585390(-))

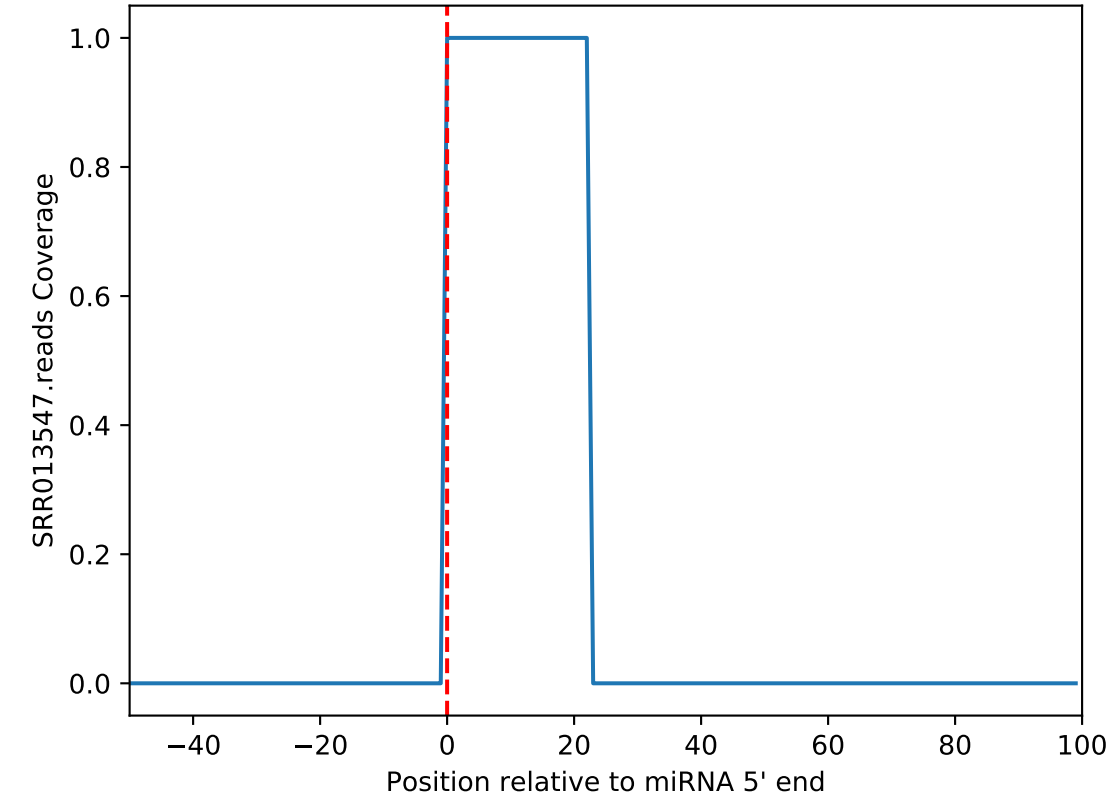

mir-992 (chr2R:20585390(-))



mir-10 (chr3R:6809574(-))

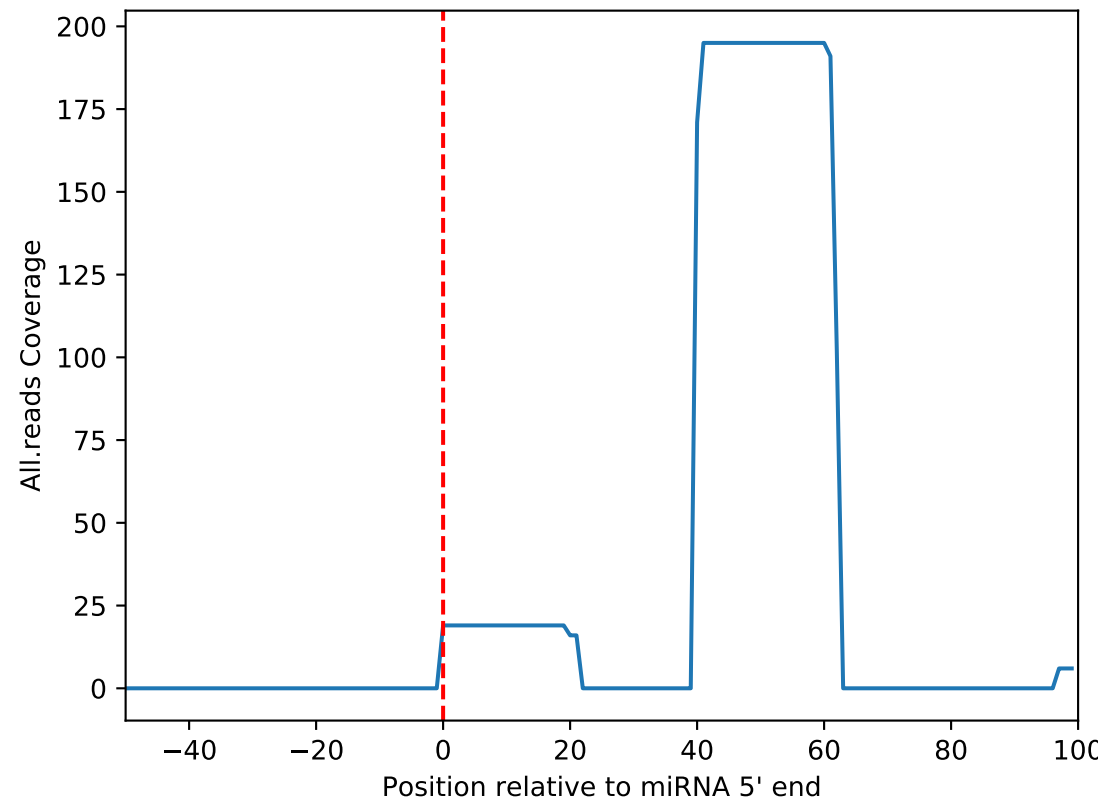

mir-10 (chr3R:6809574(-))

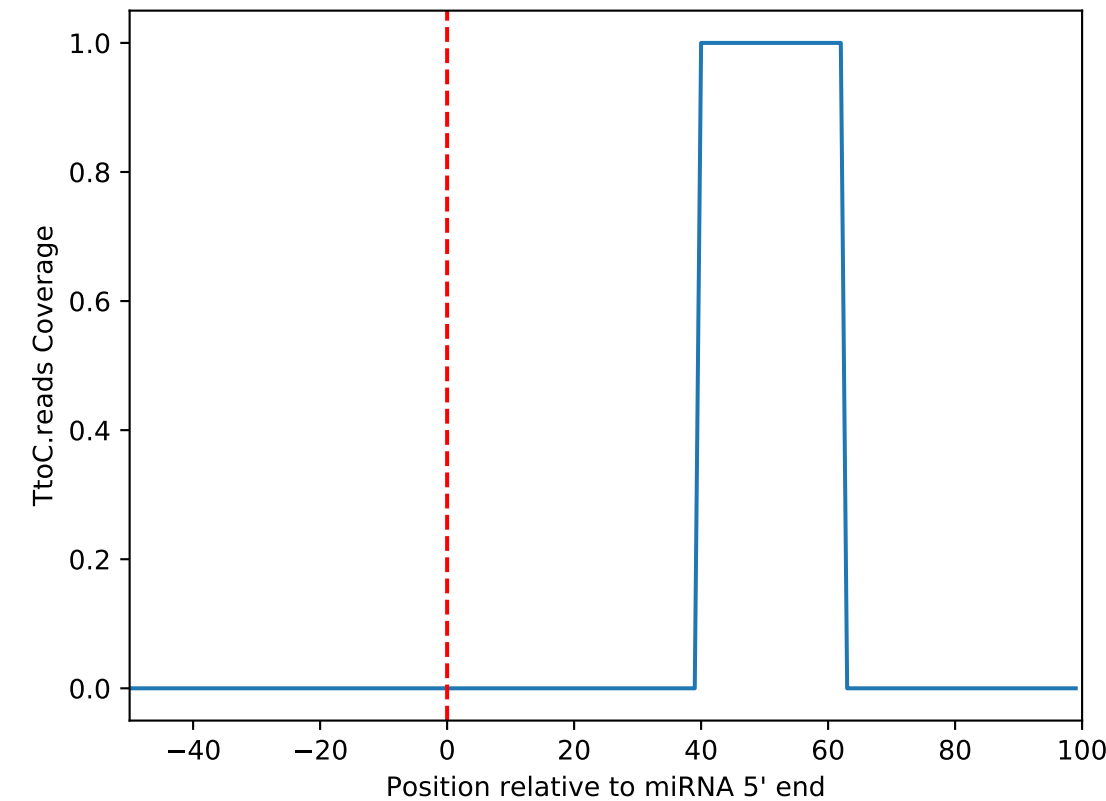

mir-10 (chr3R:6809574(-))

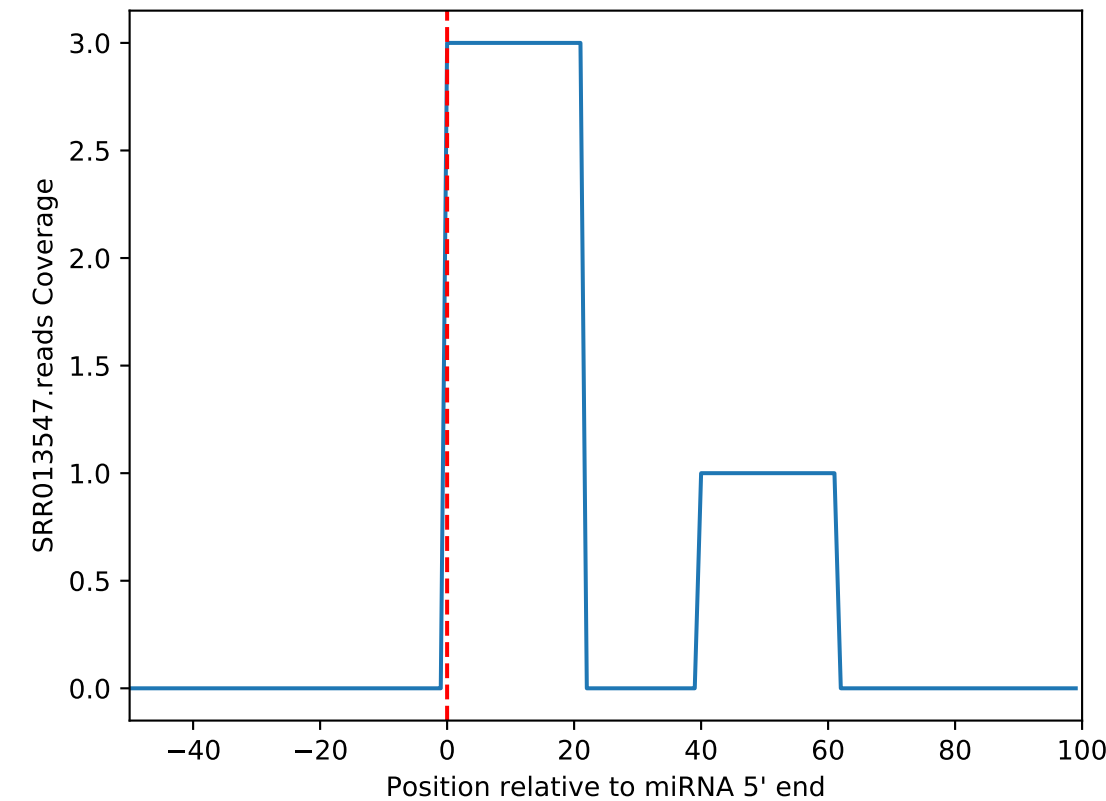

mir-10 (chr3R:6809574(-))

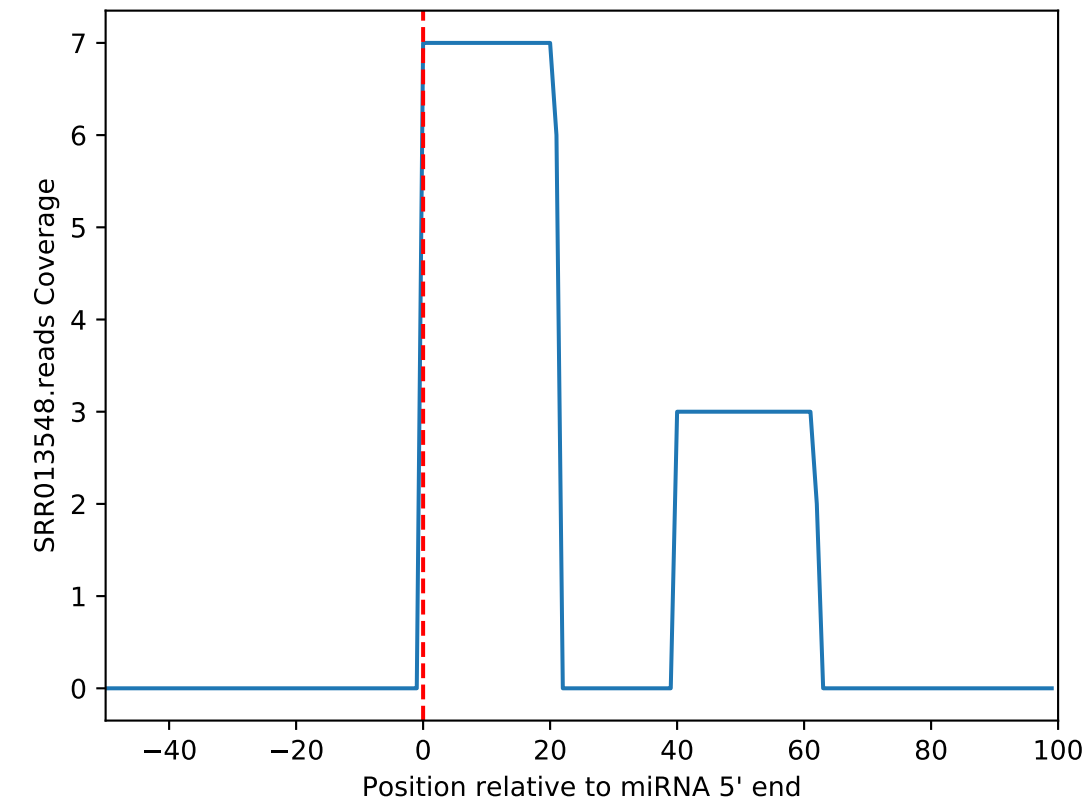

mir-970 (chrX:12636352(+))

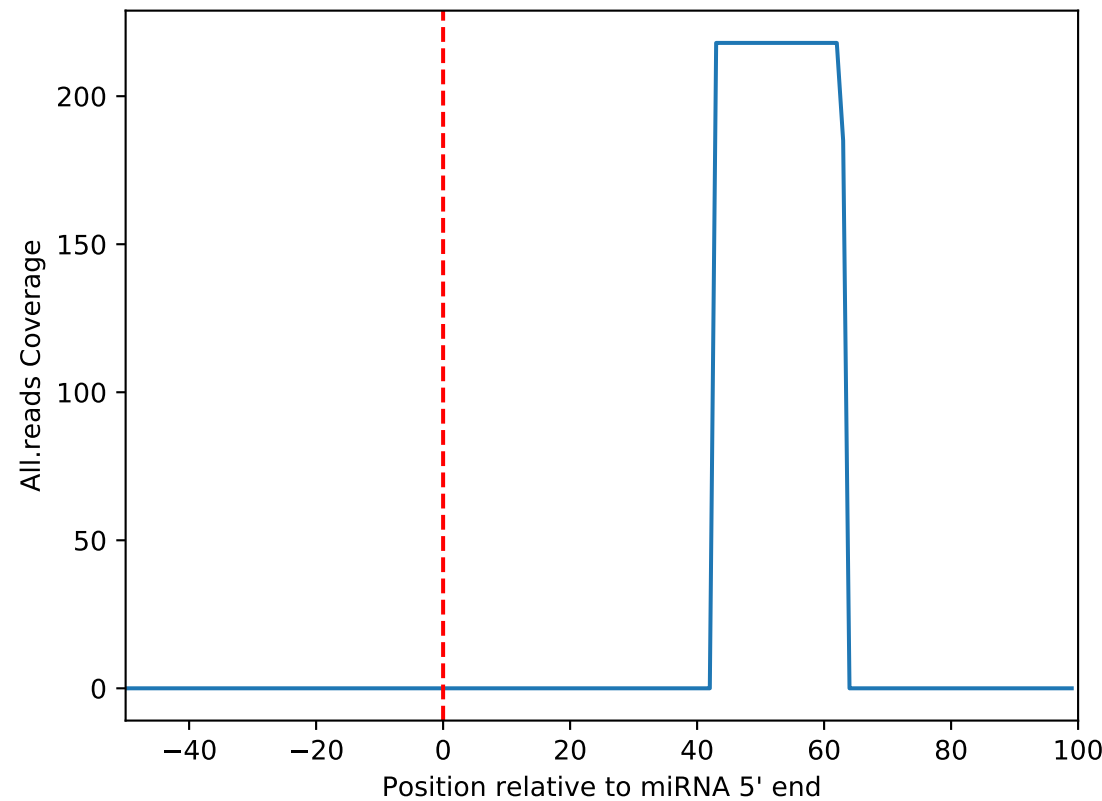

mir-970 (chrX:12636352(+))

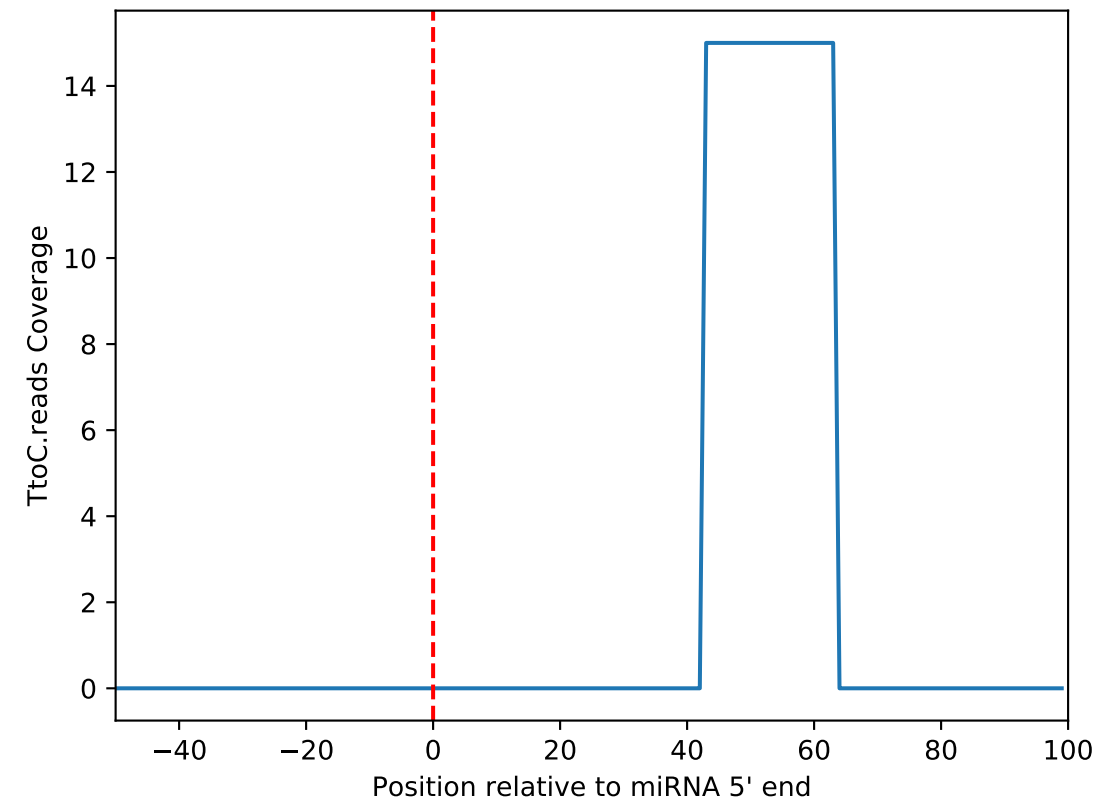

mir-970 (chrX:12636352(+))

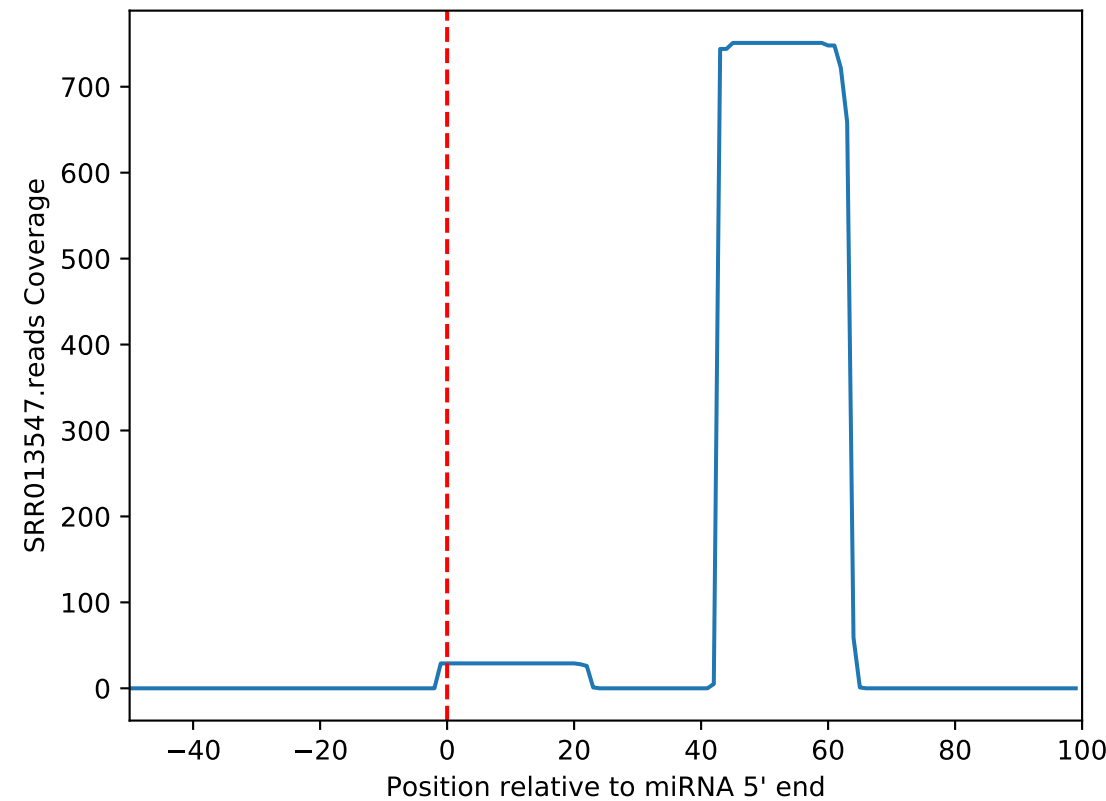

mir-970 (chrX:12636352(+))

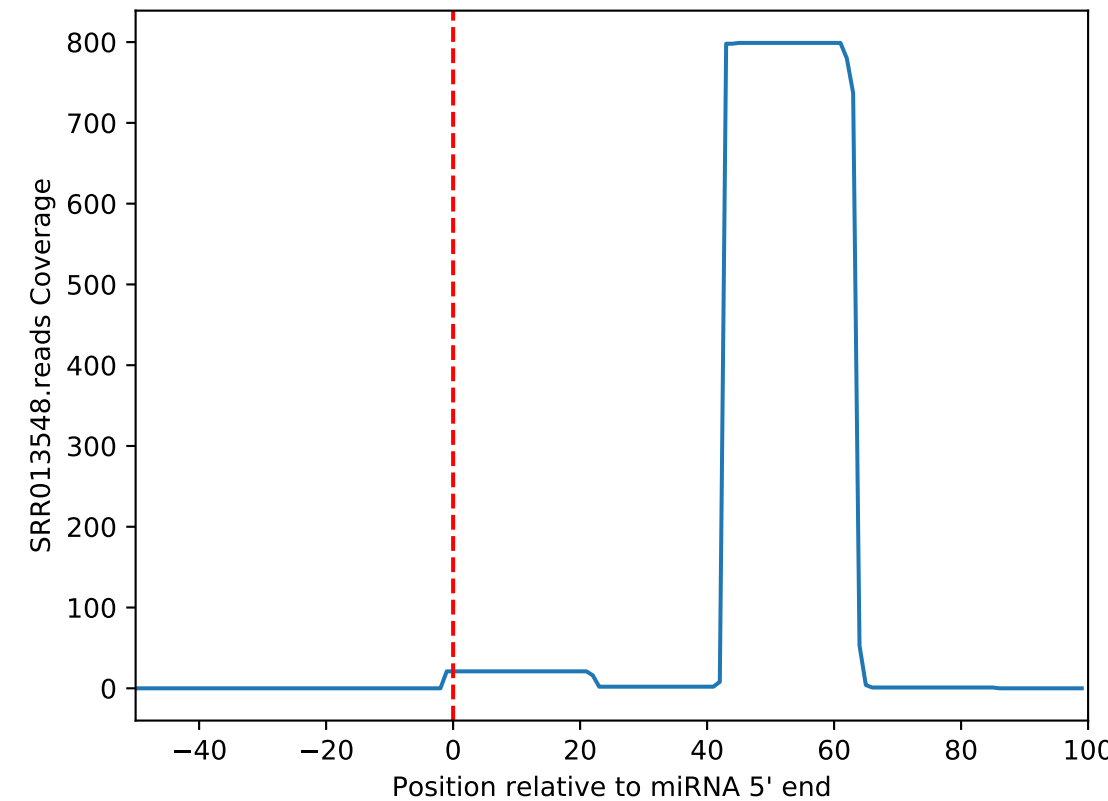

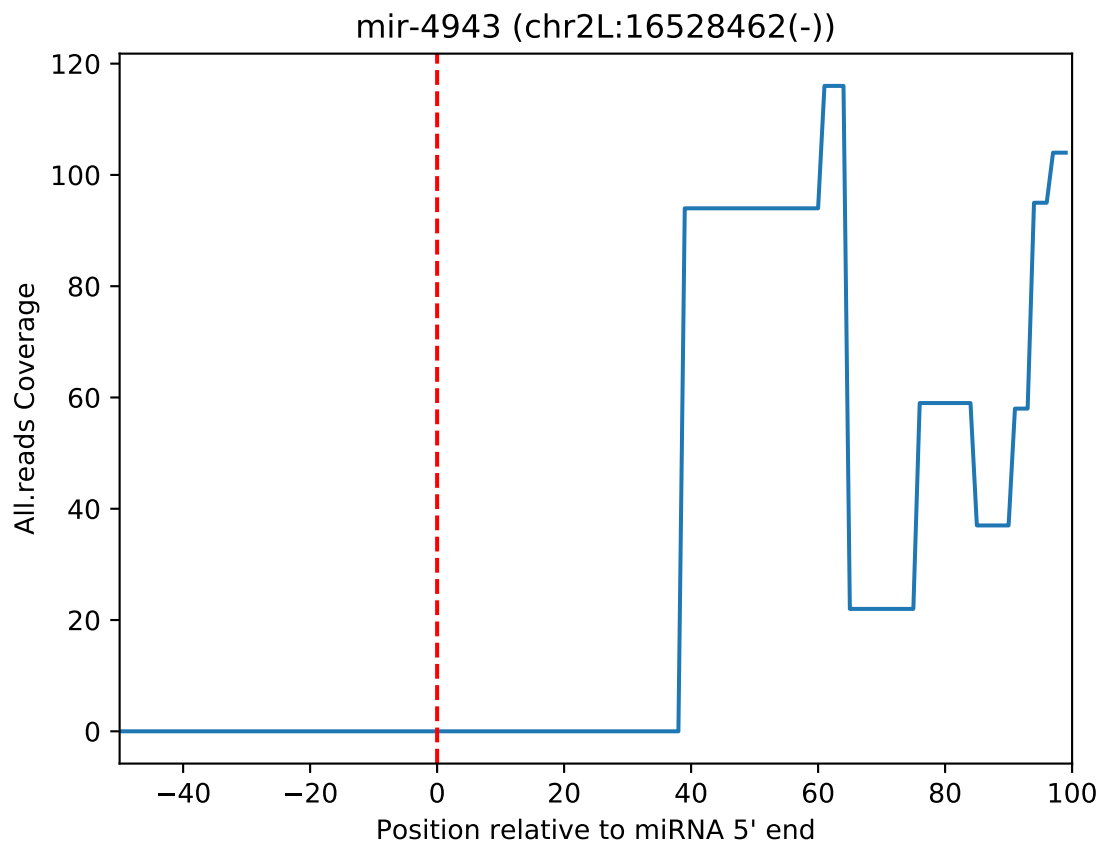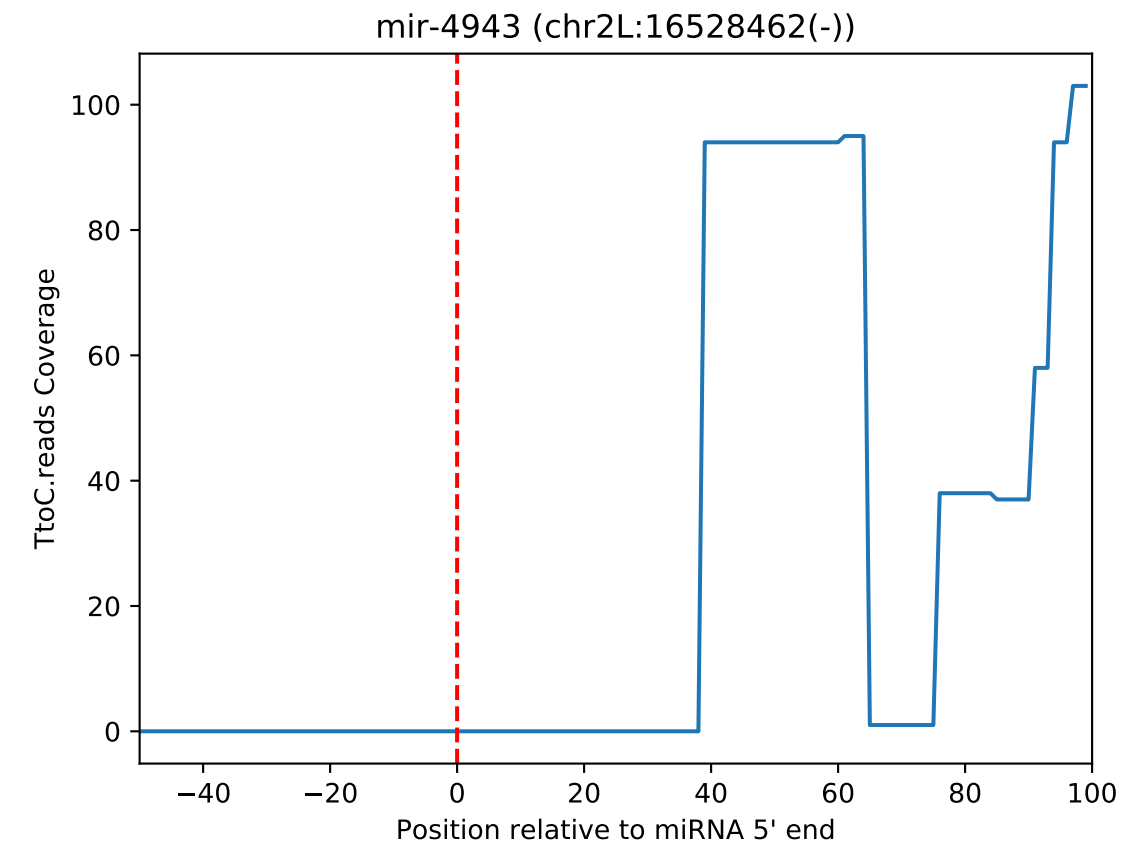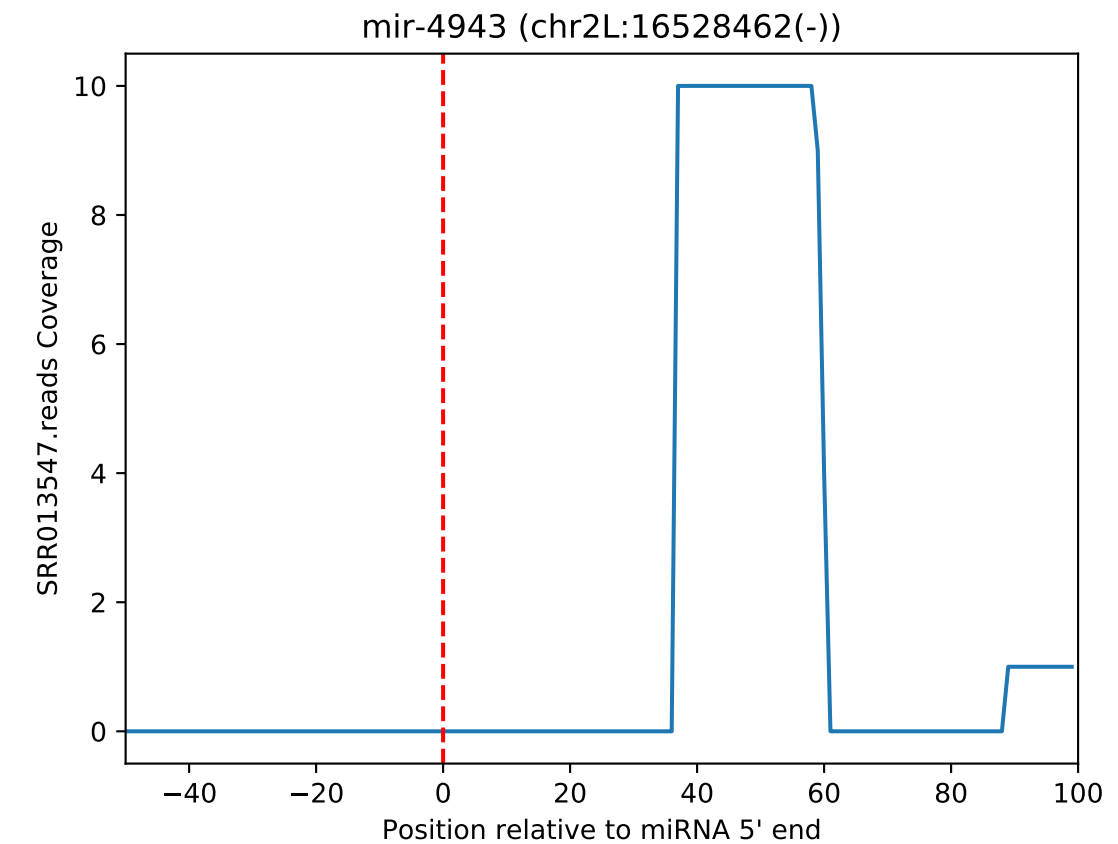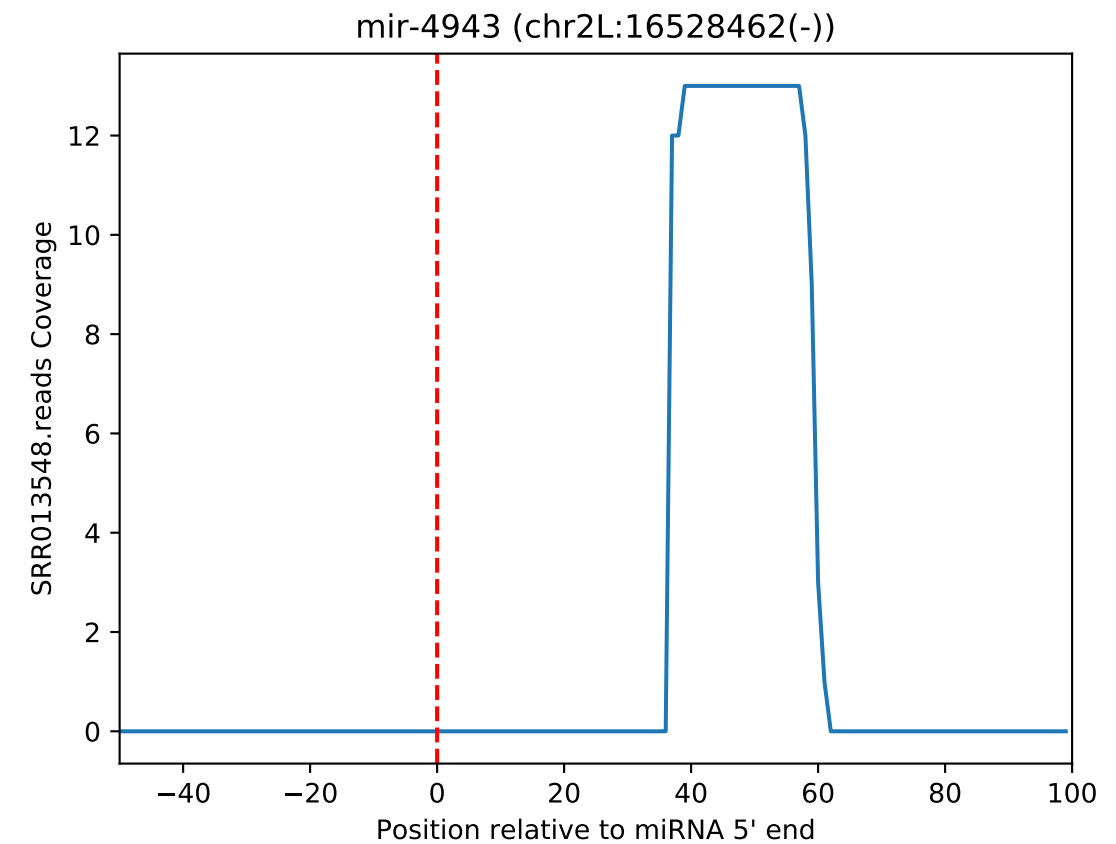

mir-284 (chr3R:12551605(-))

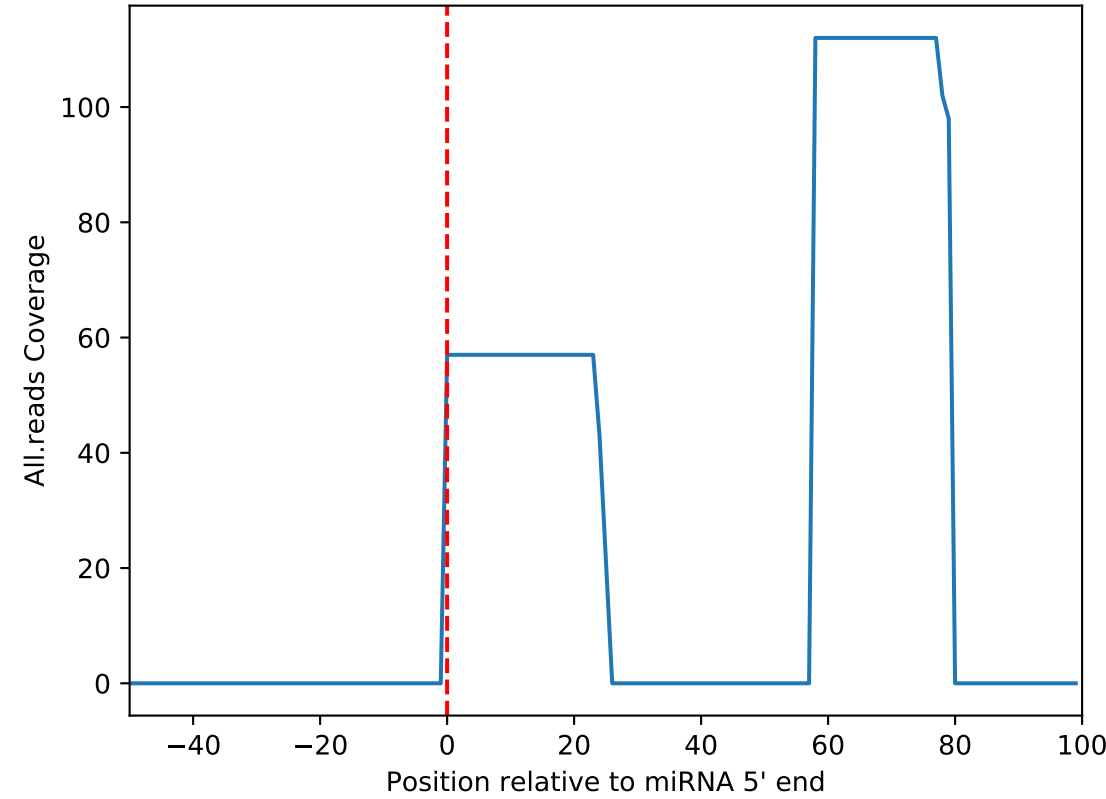

mir-284 (chr3R:12551605(-))



mir-284 (chr3R:12551605(-))

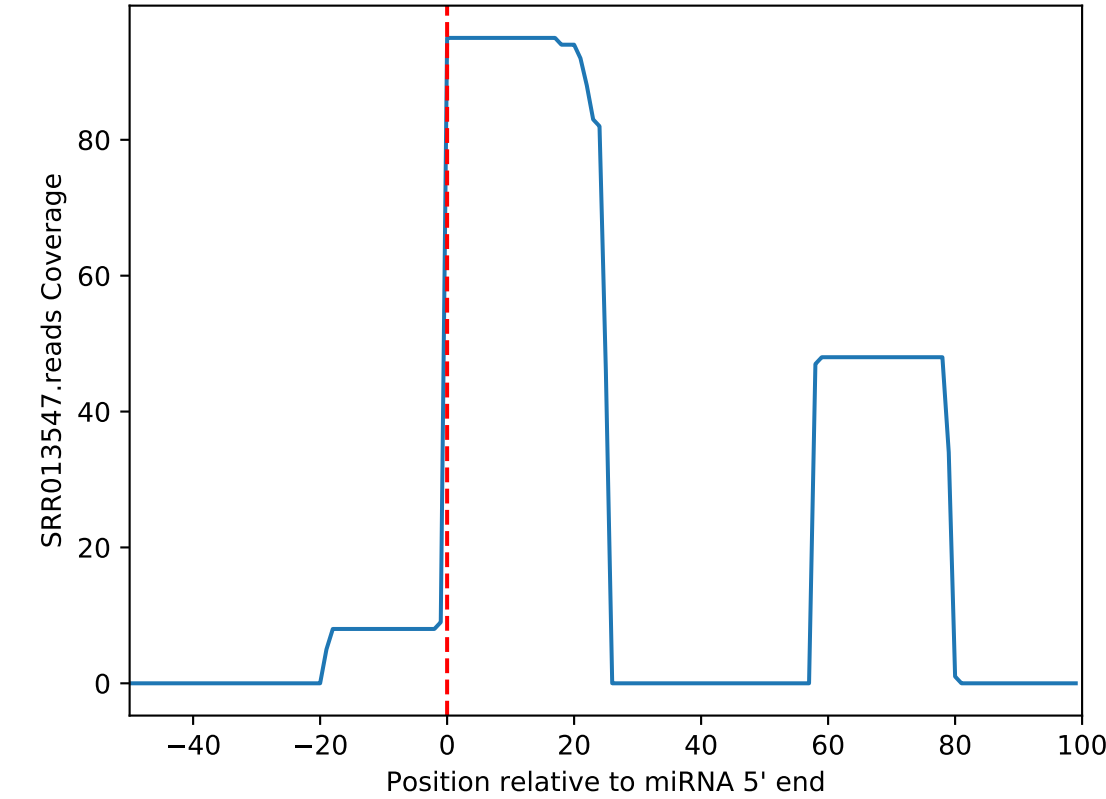

mir-284 (chr3R:12551605(-))

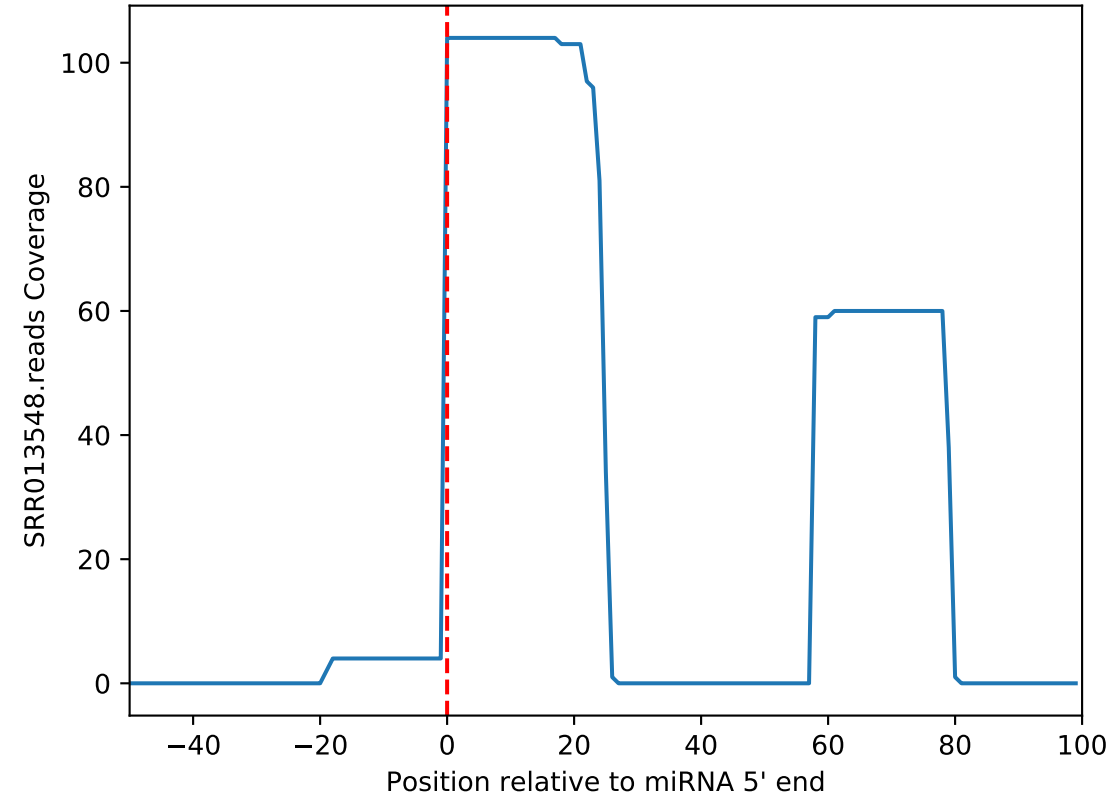



mir-281-2 (chr2R:12170230(-))

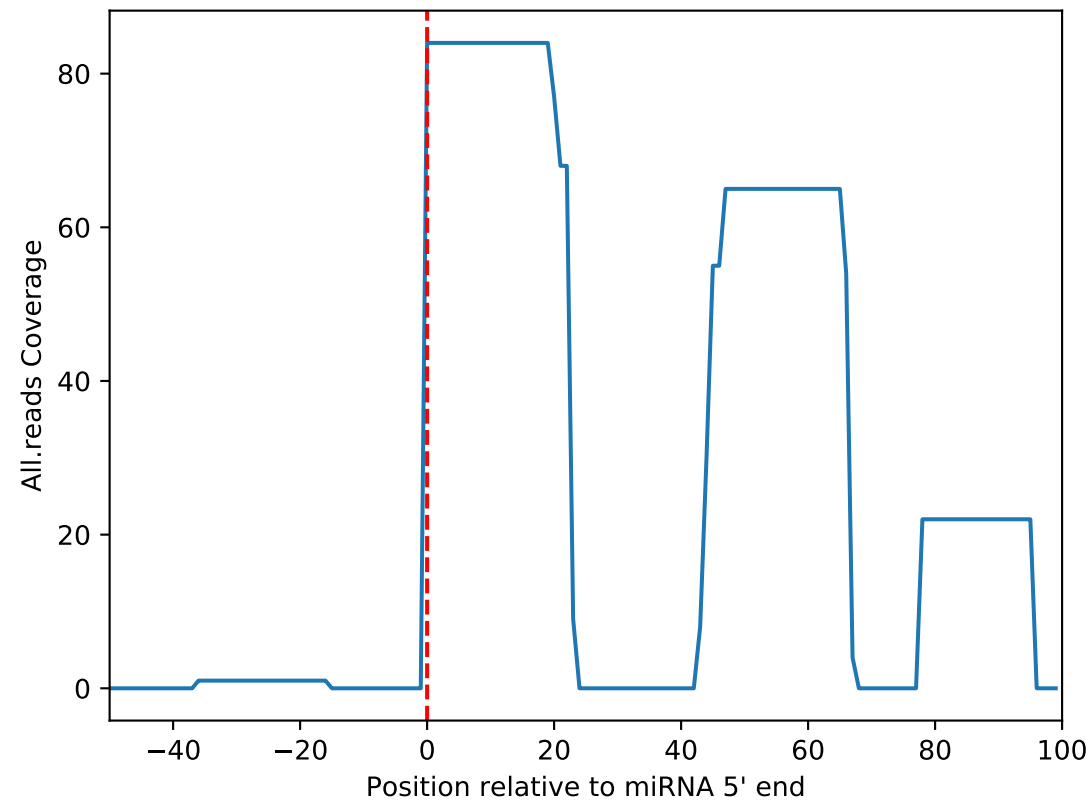

mir-281-2 (chr2R:12170230(-))

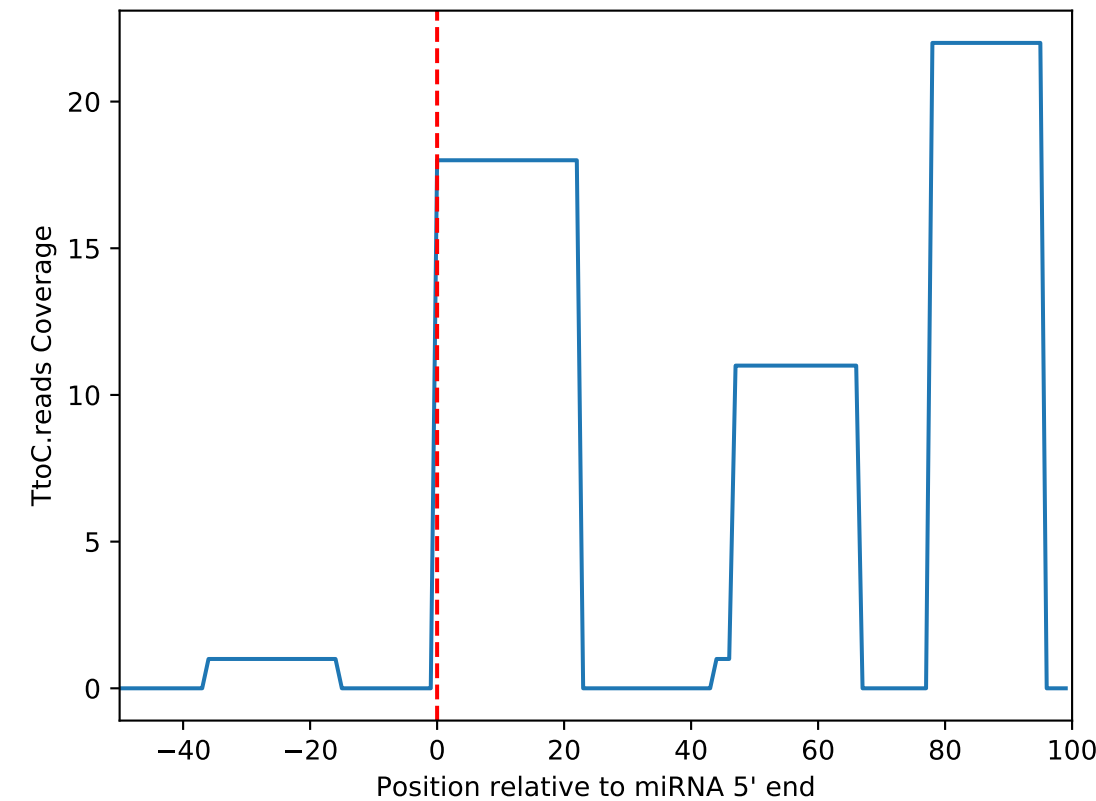

mir-281-2 (chr2R:12170230(-))

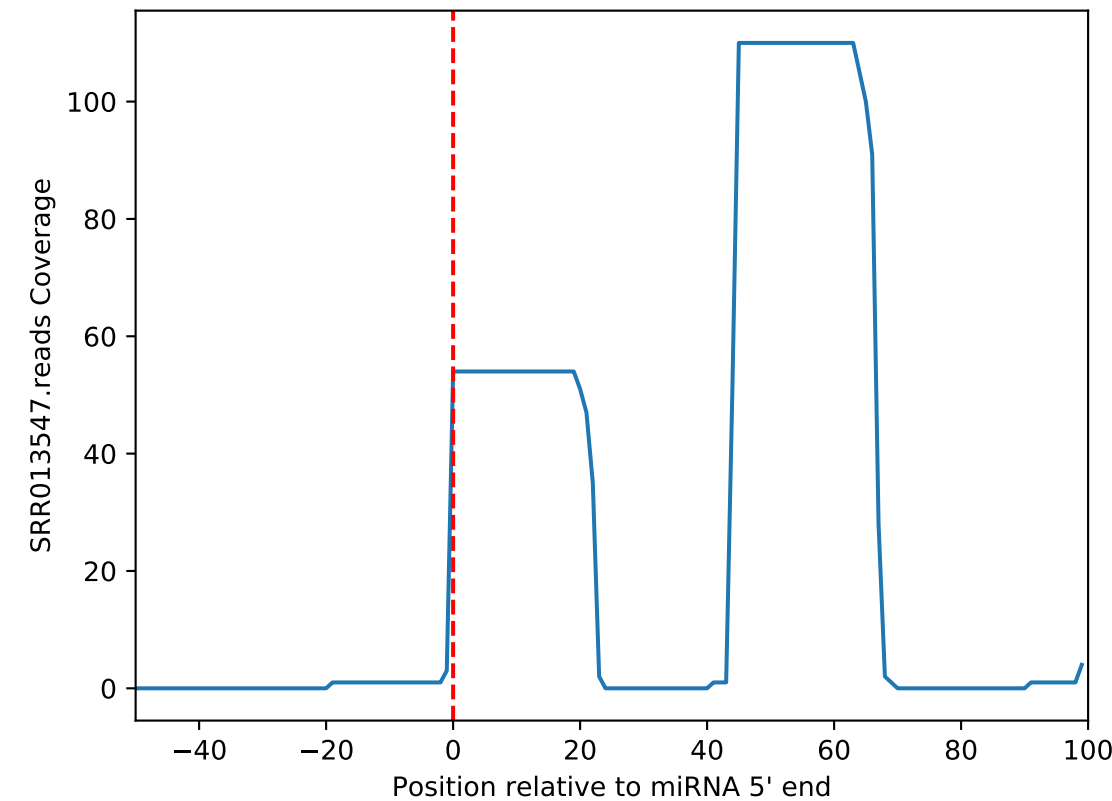

mir-281-2 (chr2R:12170230(-))

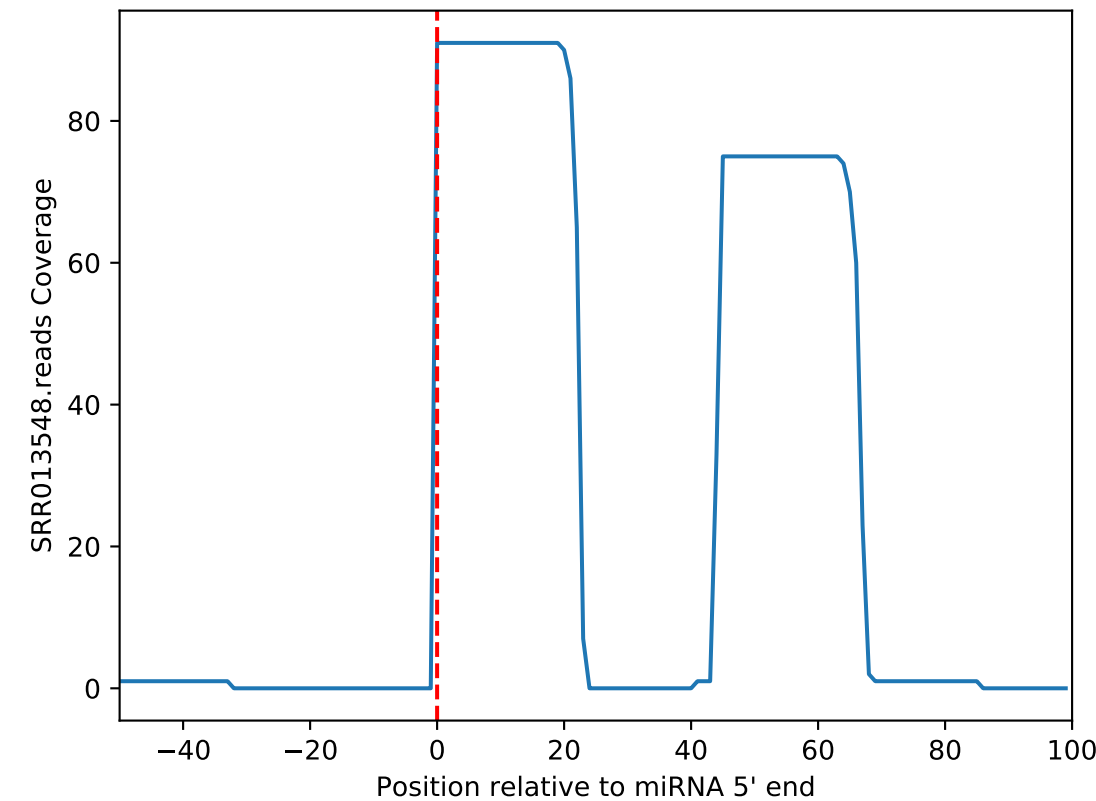

mir-314 (chr3L:11773014(+))

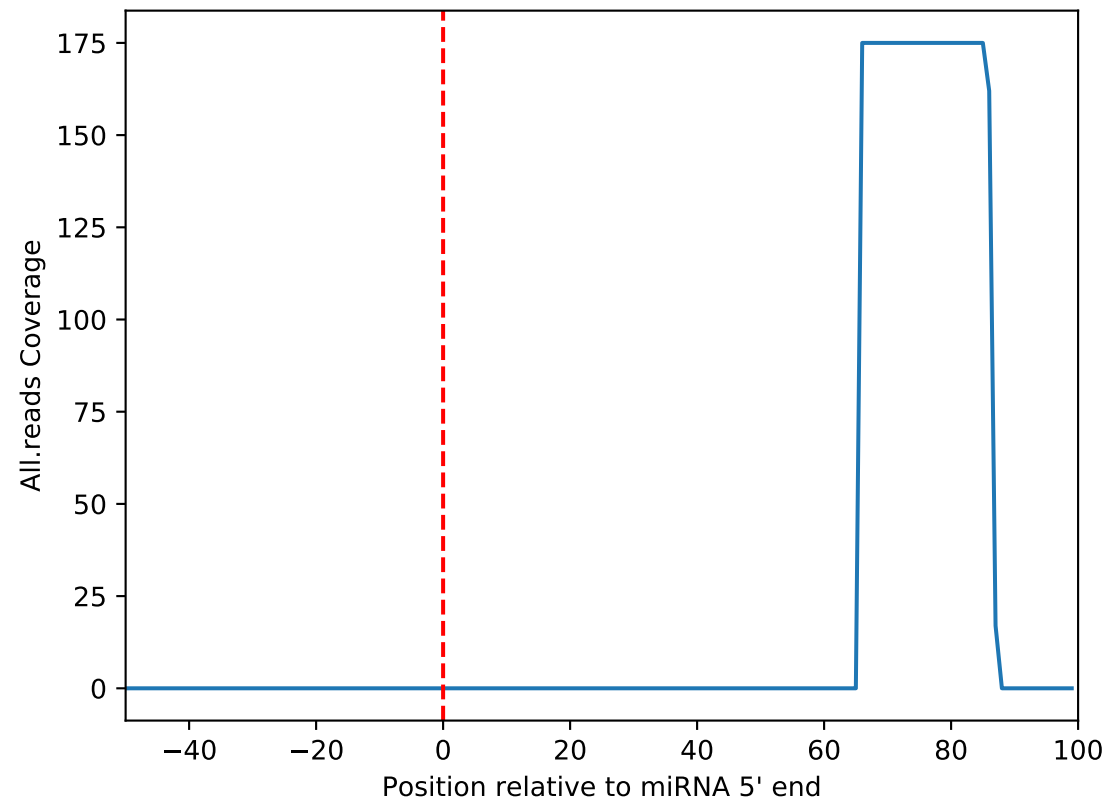

mir-314 (chr3L:11773014(+))

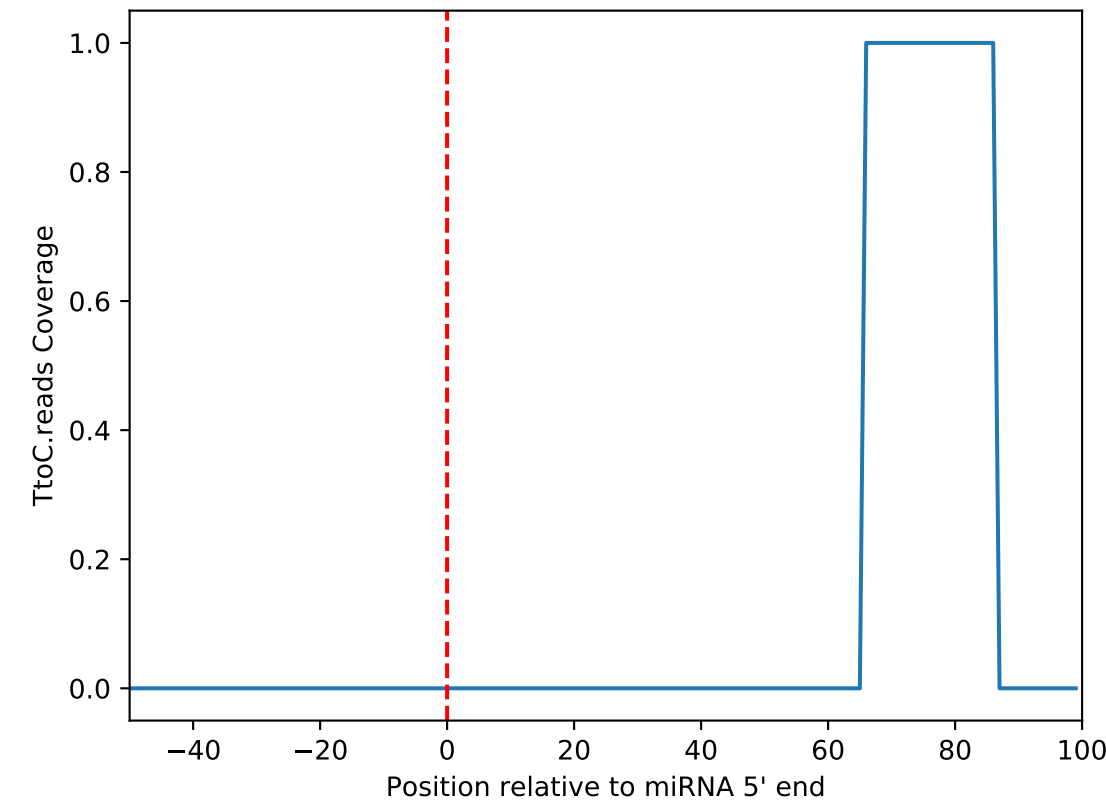

mir-314 (chr3L:11773014(+))



mir-314 (chr3L:11773014(+))



mir-1006 (chr2L:16724857(-))

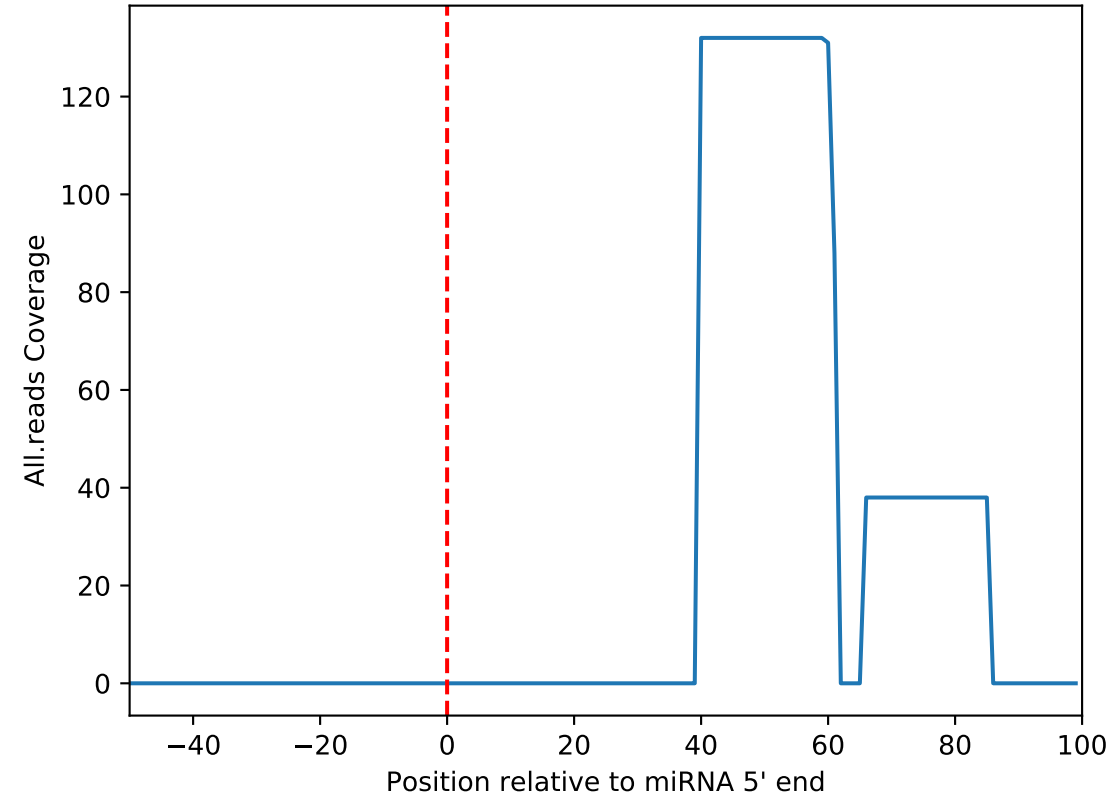

mir-1006 (chr2L:16724857(-))

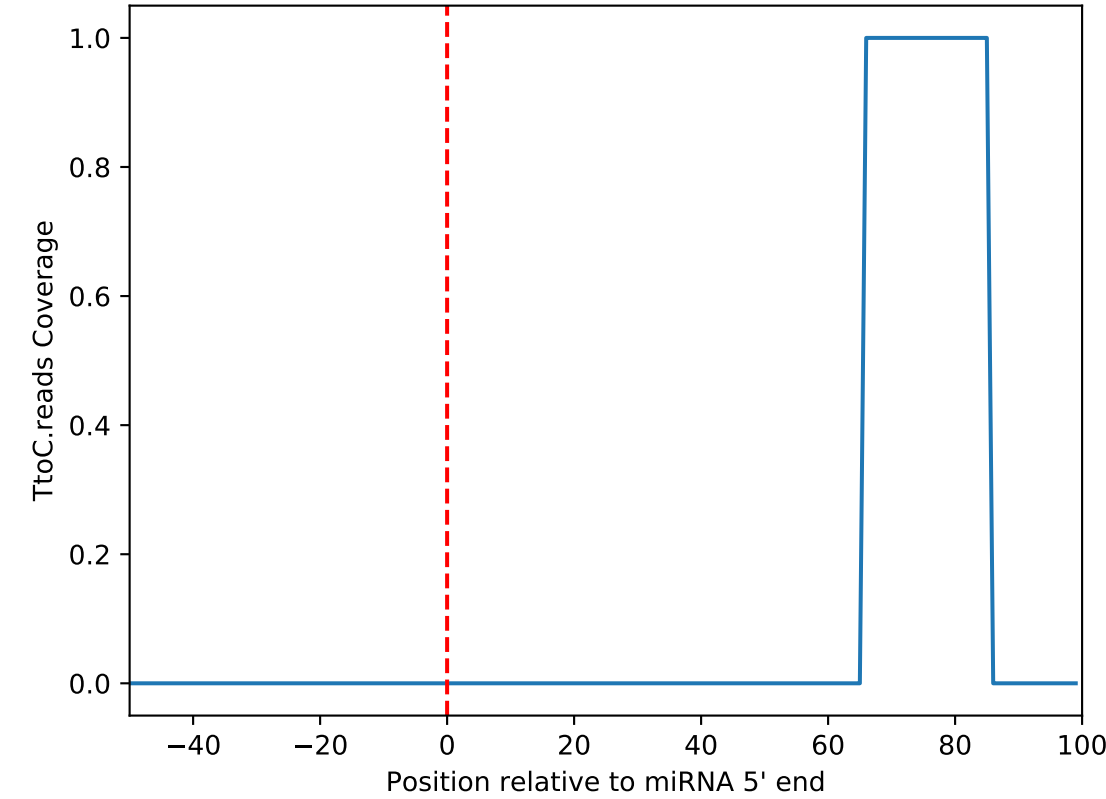

mir-1006 (chr2L:16724857(-))

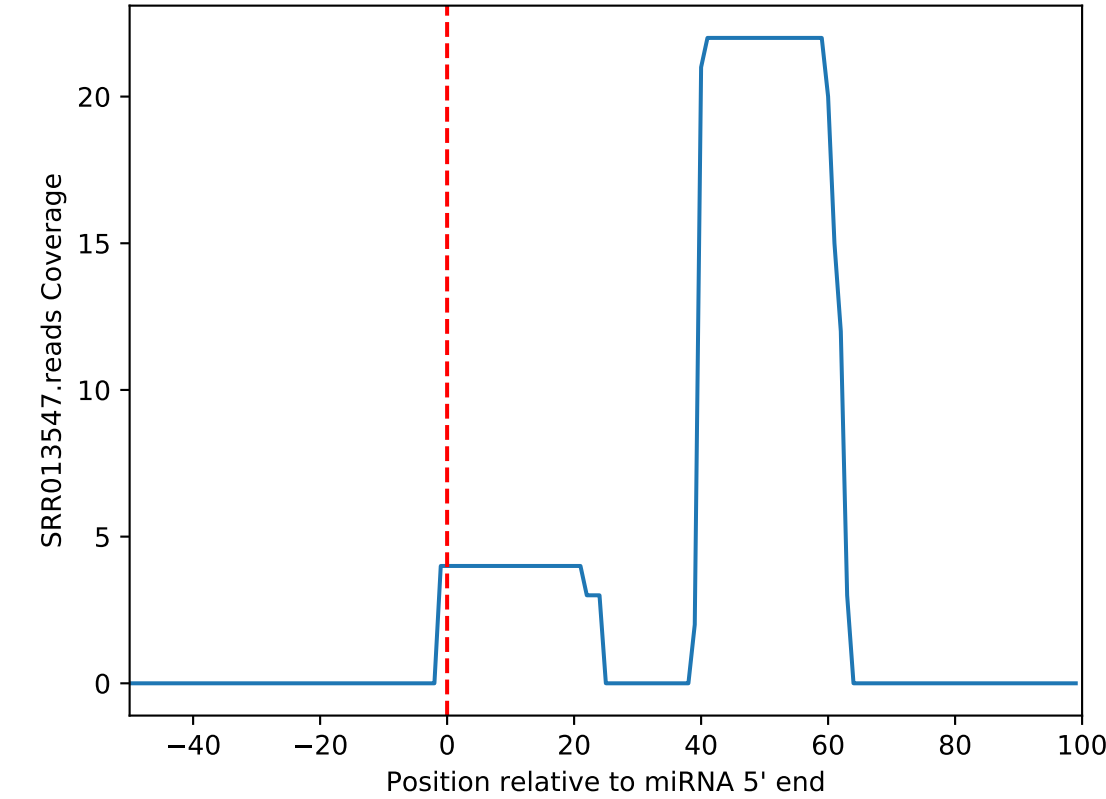

mir-1006 (chr2L:16724857(-))

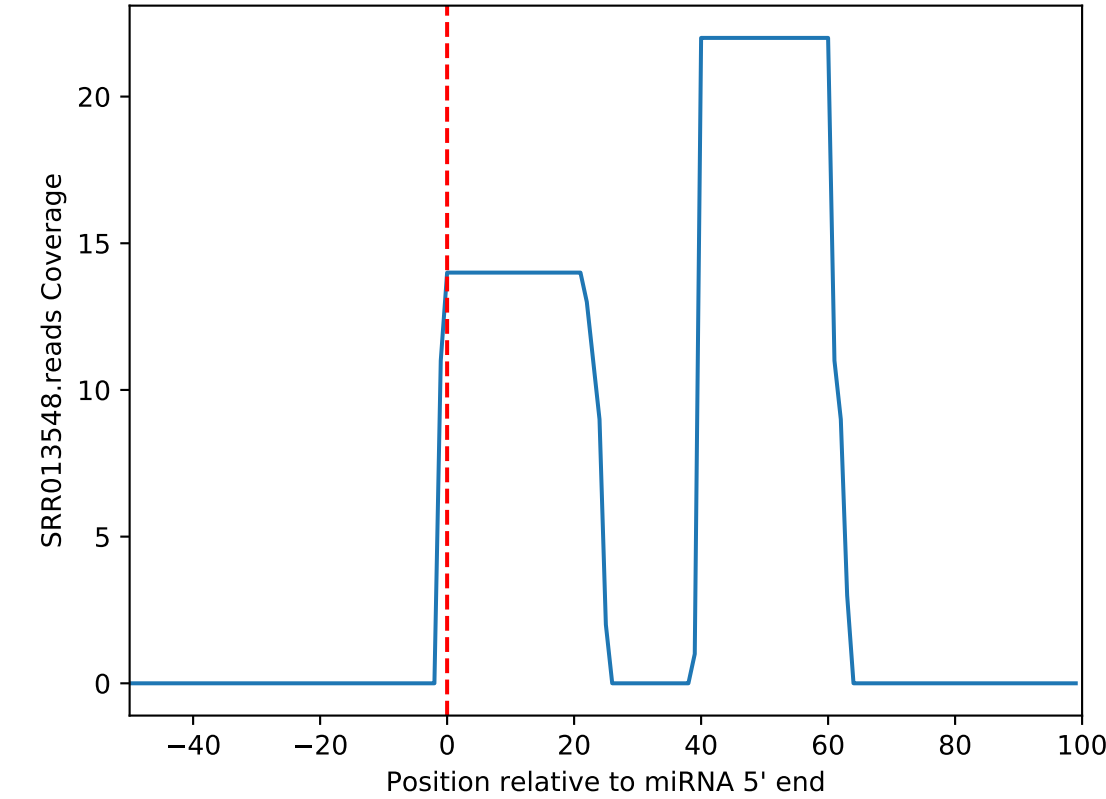

mir-2c (chr3R:15417826(-))

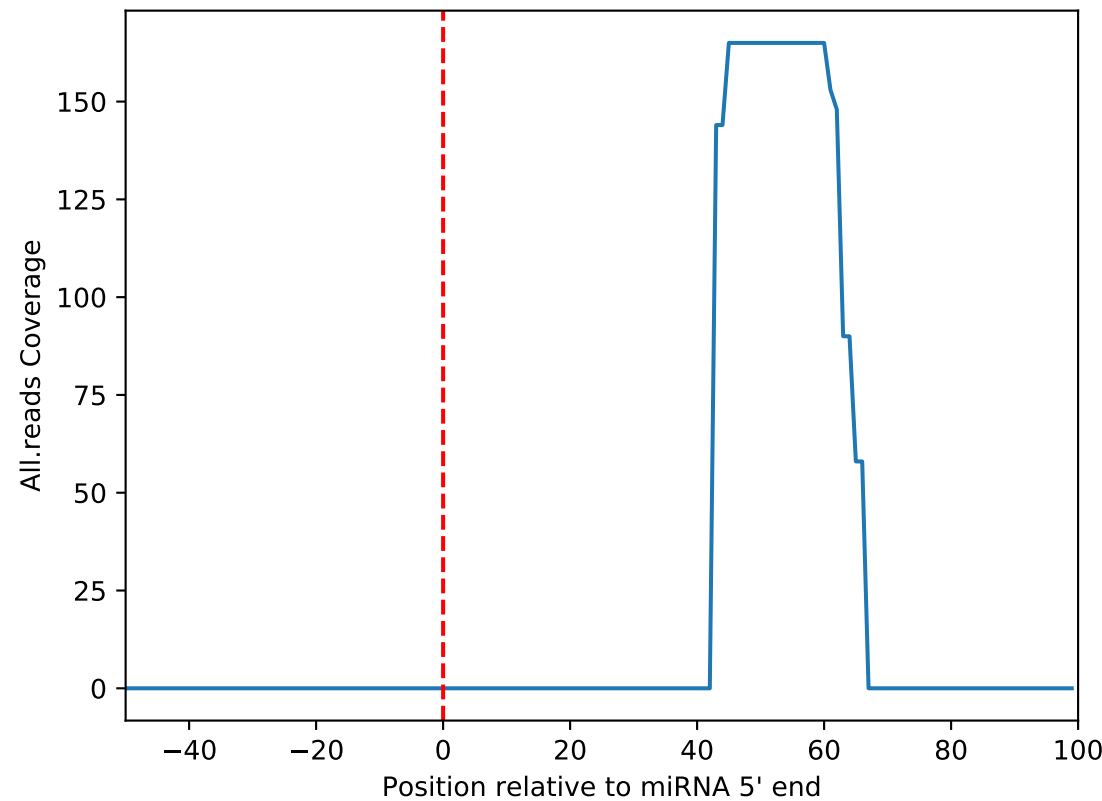

mir-2c (chr3R:15417826(-))

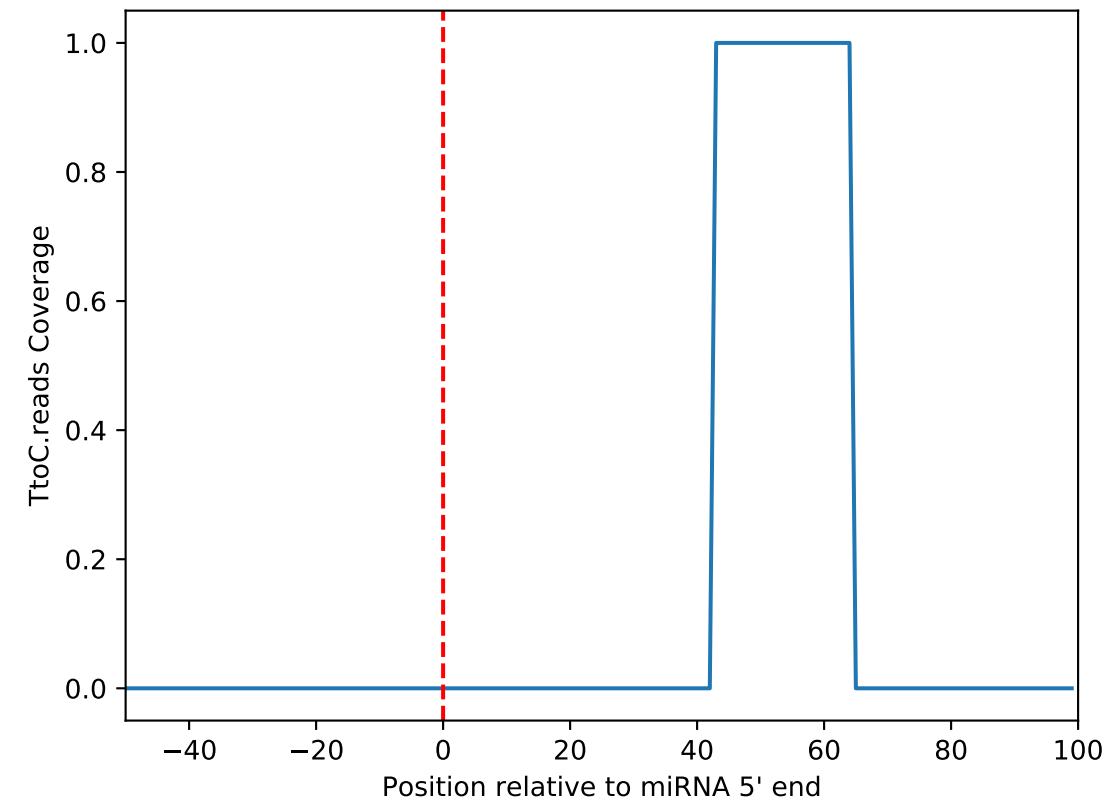

mir-2c (chr3R:15417826(-))

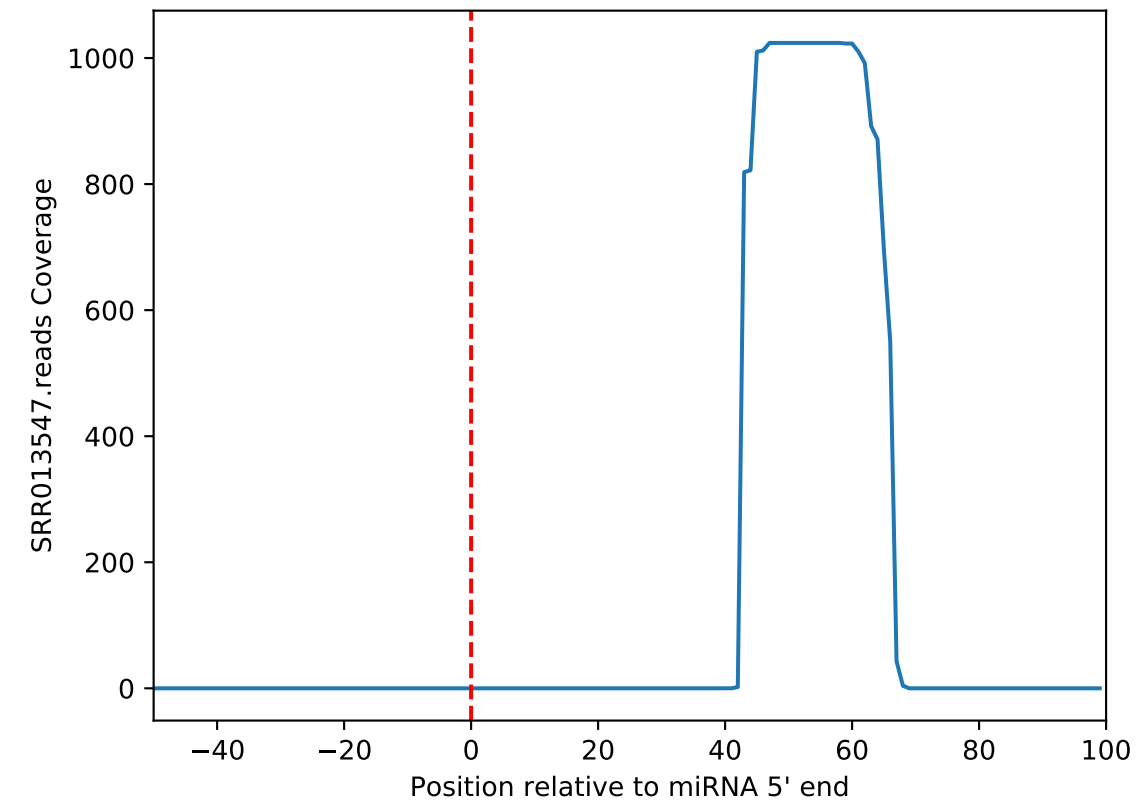

mir-2c (chr3R:15417826(-))

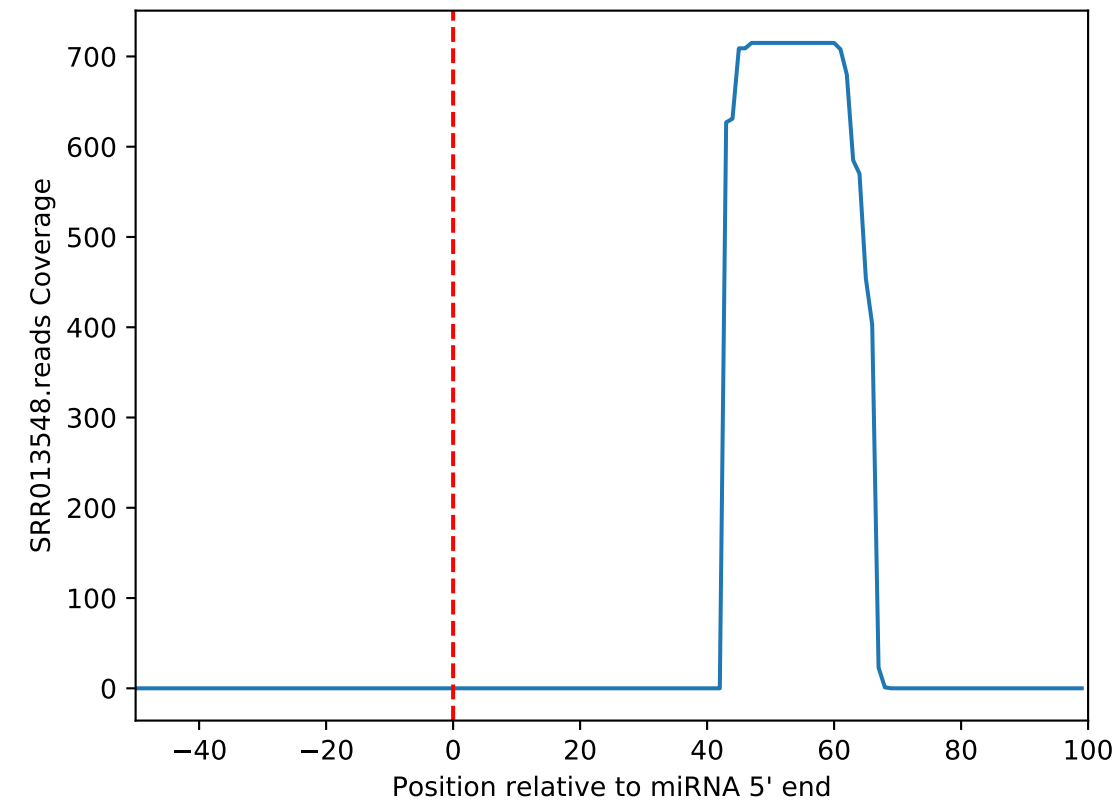

mir-980 (chrX:280254(-))

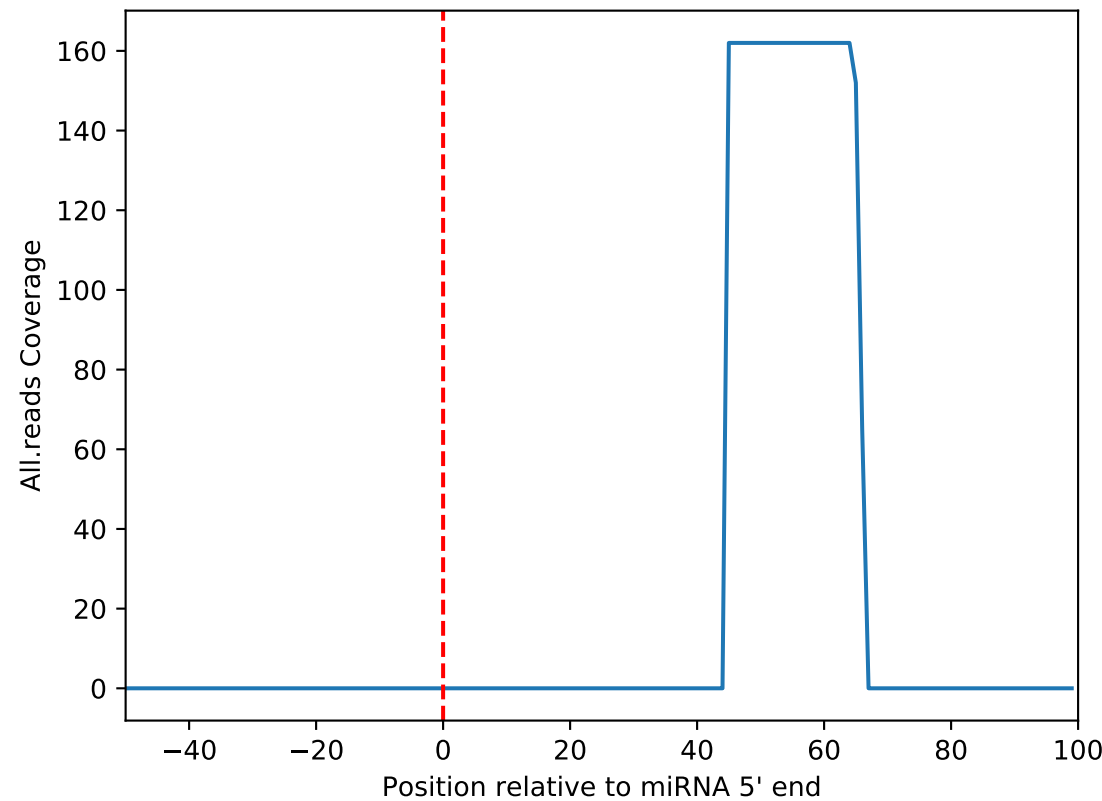

mir-980 (chrX:280254(-))

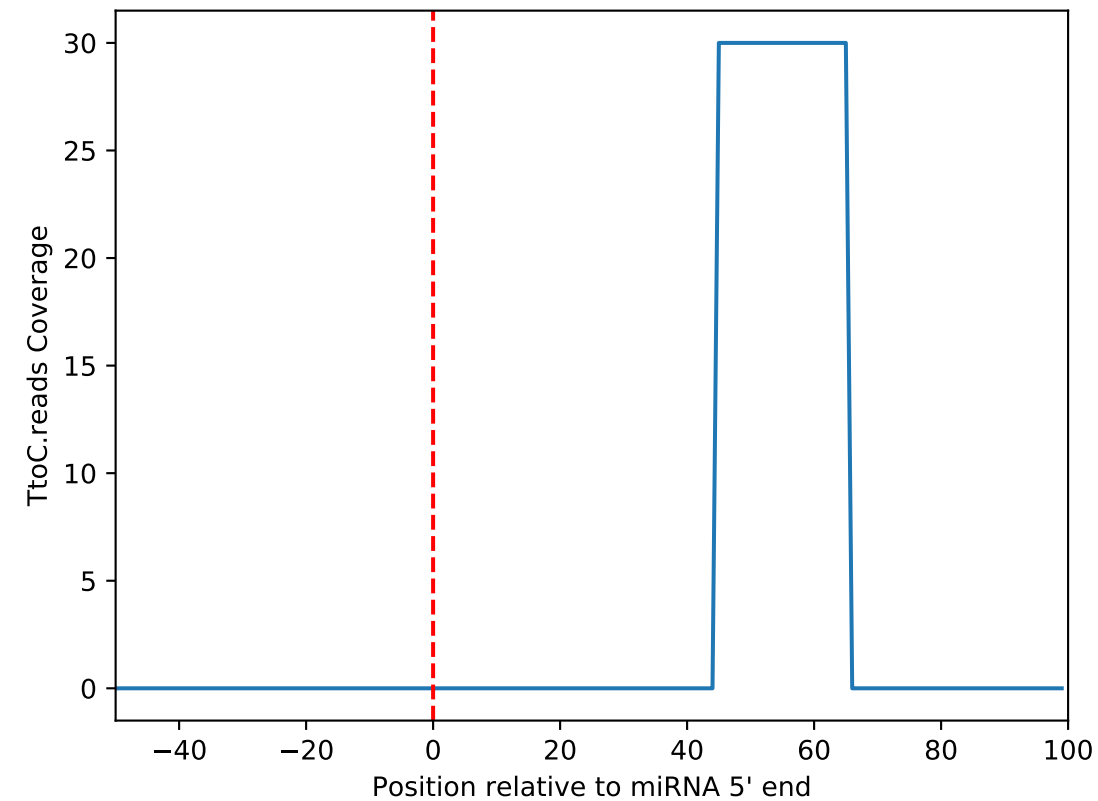

mir-980 (chrX:280254(-))

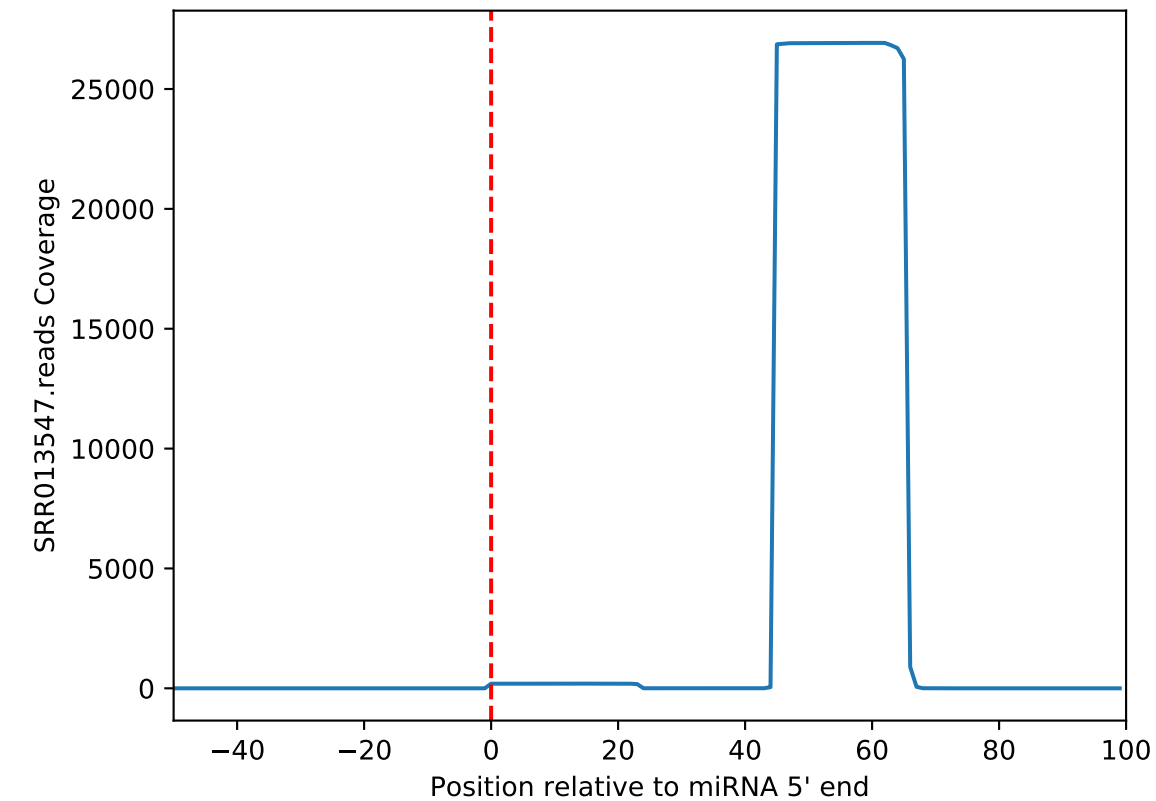

mir-980 (chrX:280254(-))

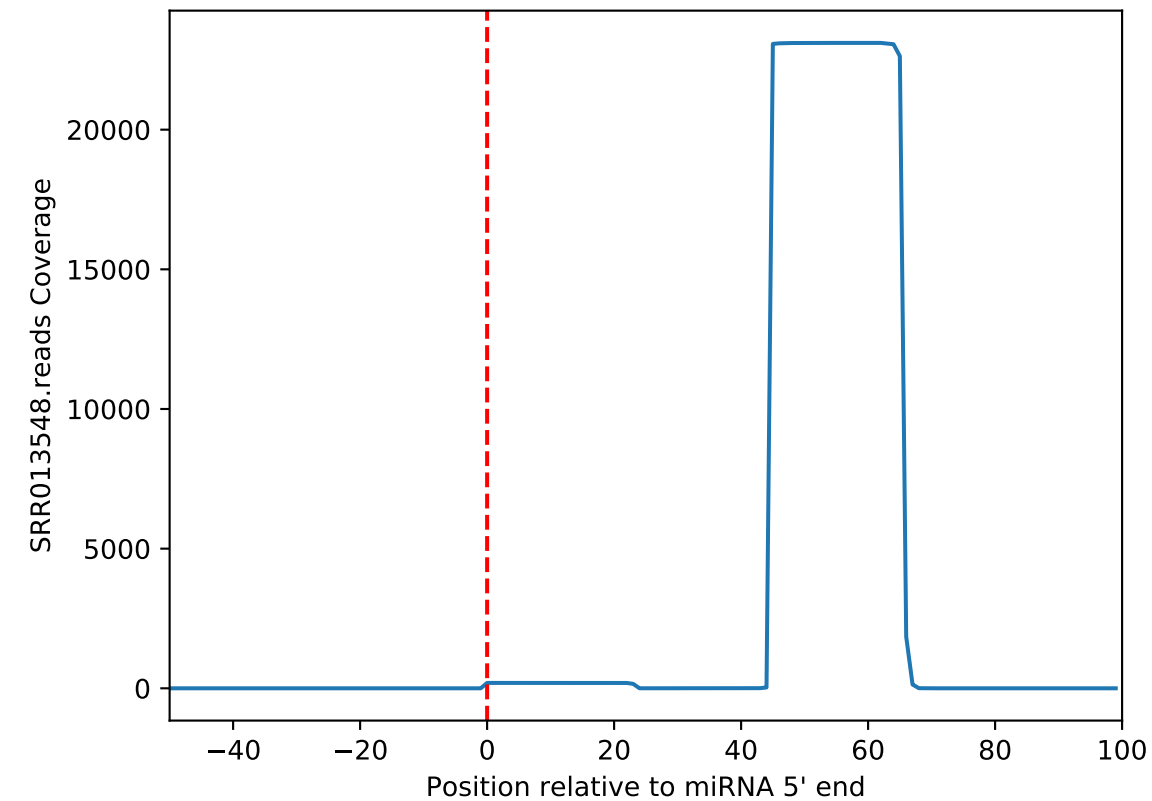

mir-1016 (chr2R:14233186(-))

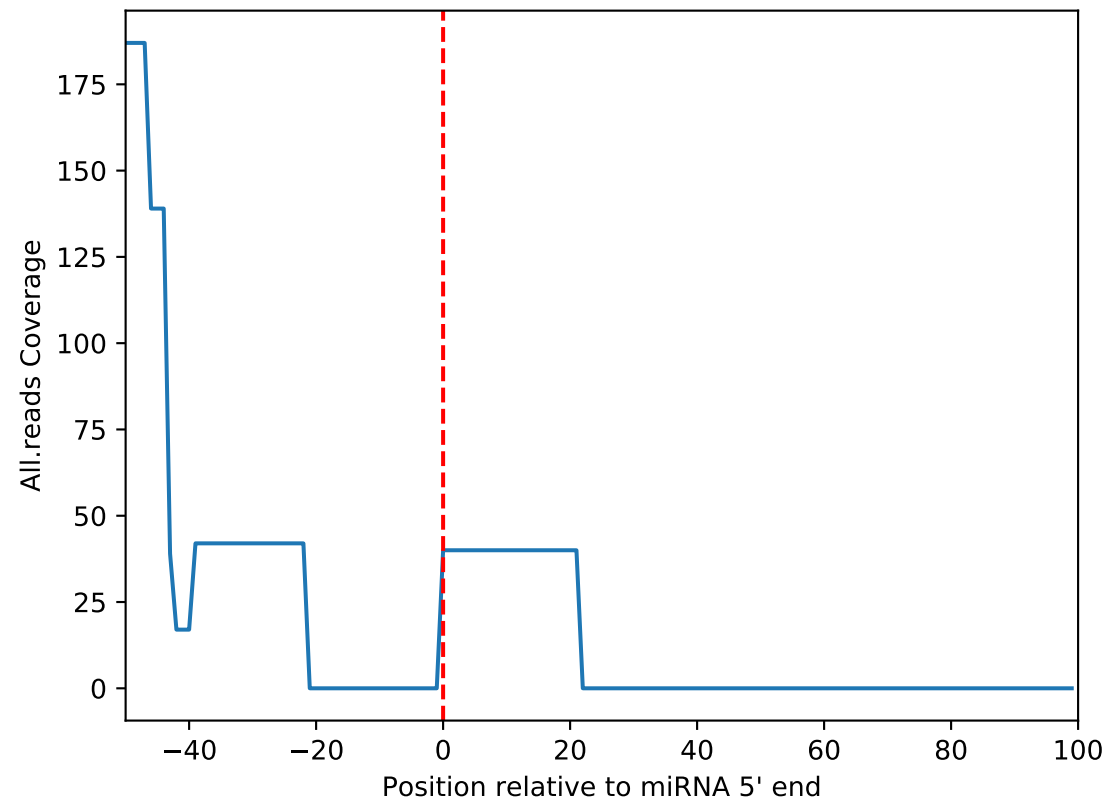

mir-1016 (chr2R:14233186(-))

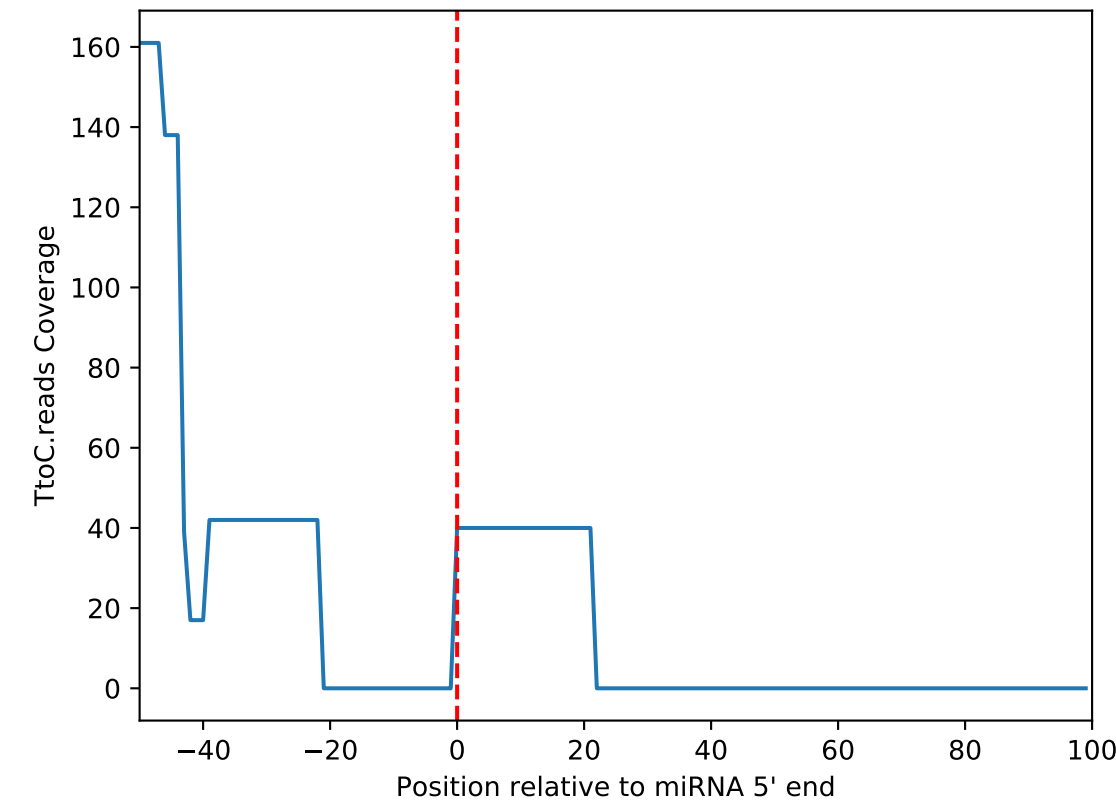

mir-1016 (chr2R:14233186(-))

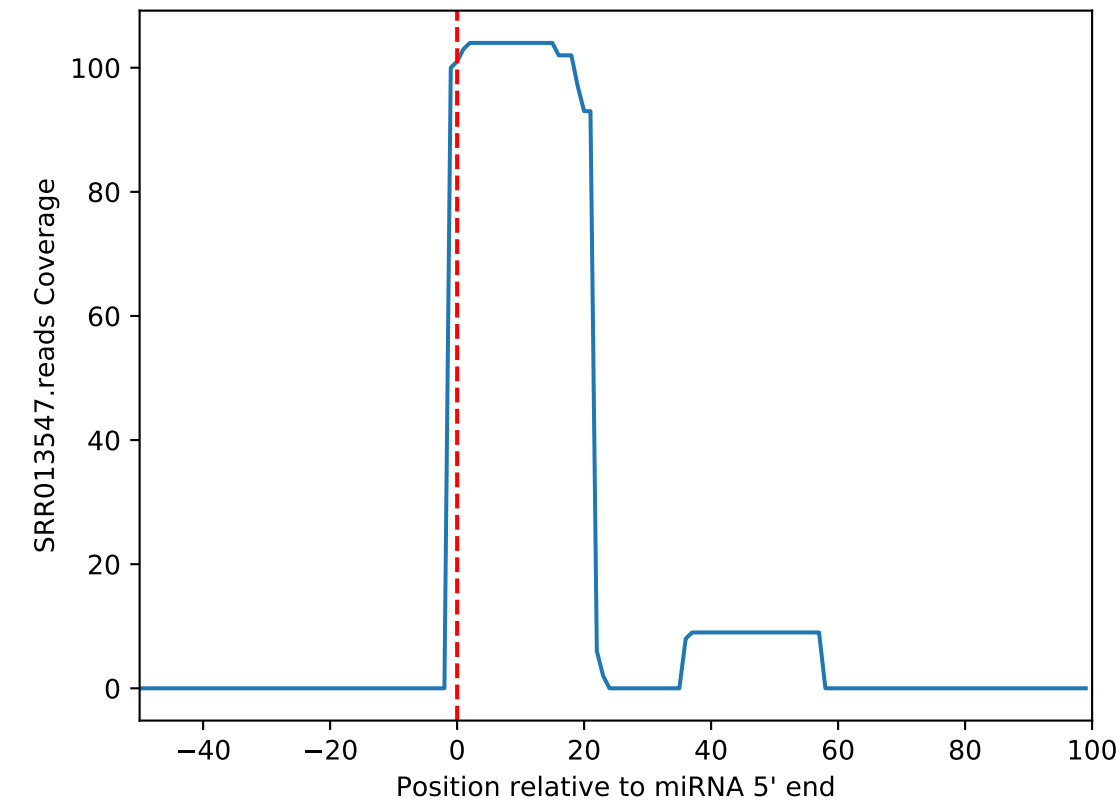

mir-1016 (chr2R:14233186(-))

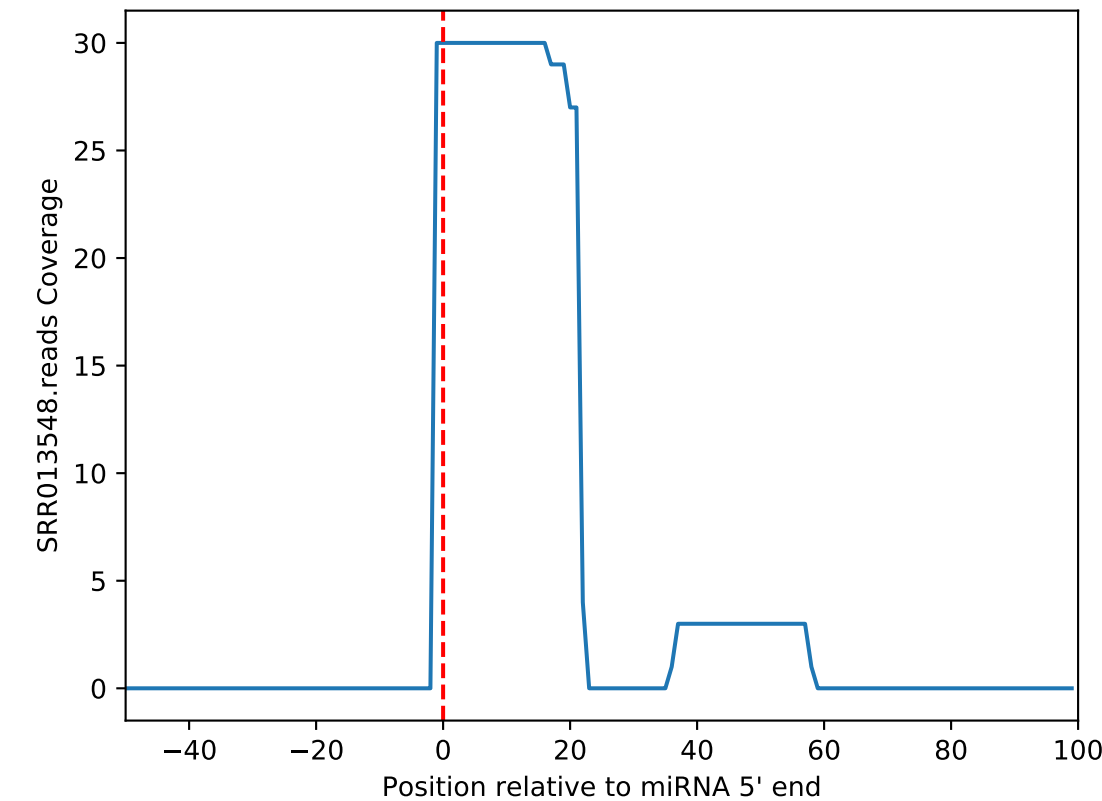

mir-4987 (chr2L:10840447(-))

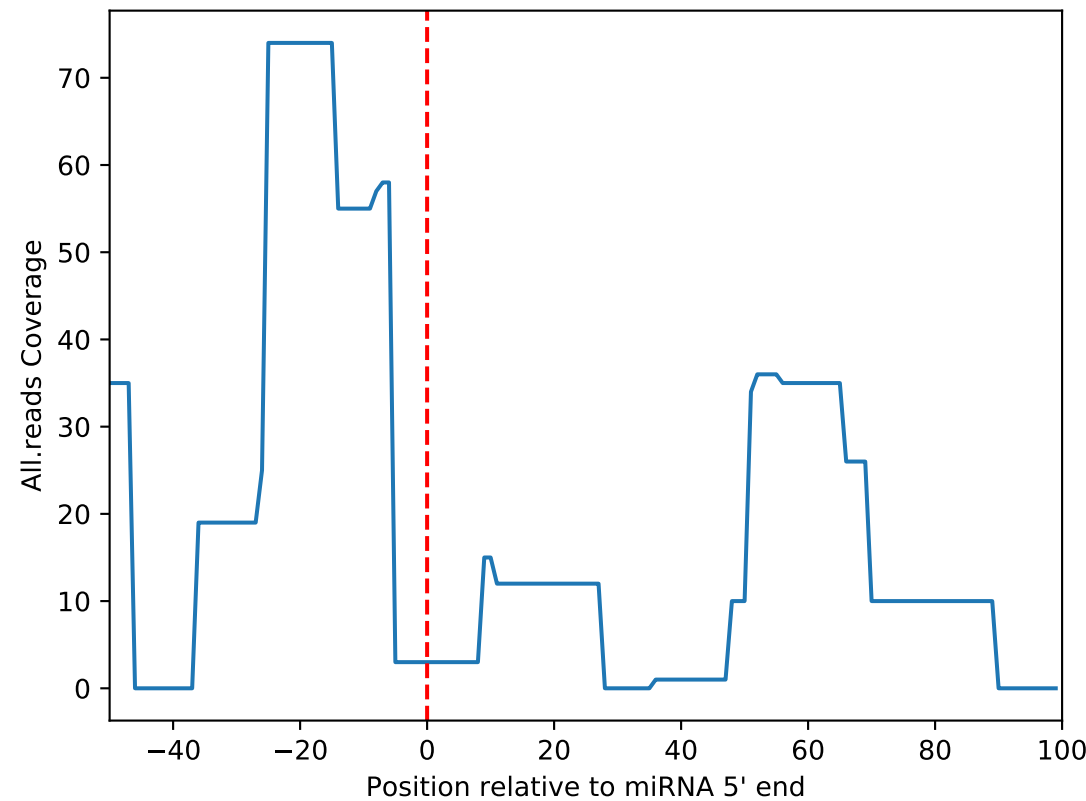

mir-4987 (chr2L:10840447(-))

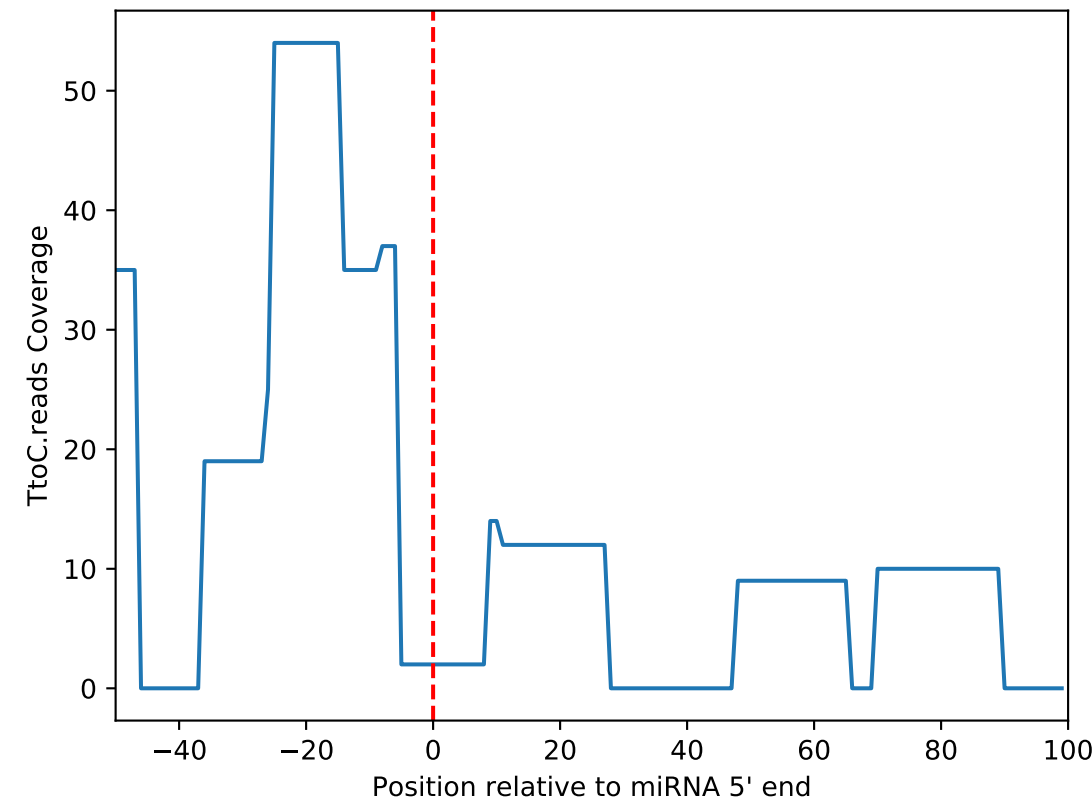

mir-4987 (chr2L:10840447(-))

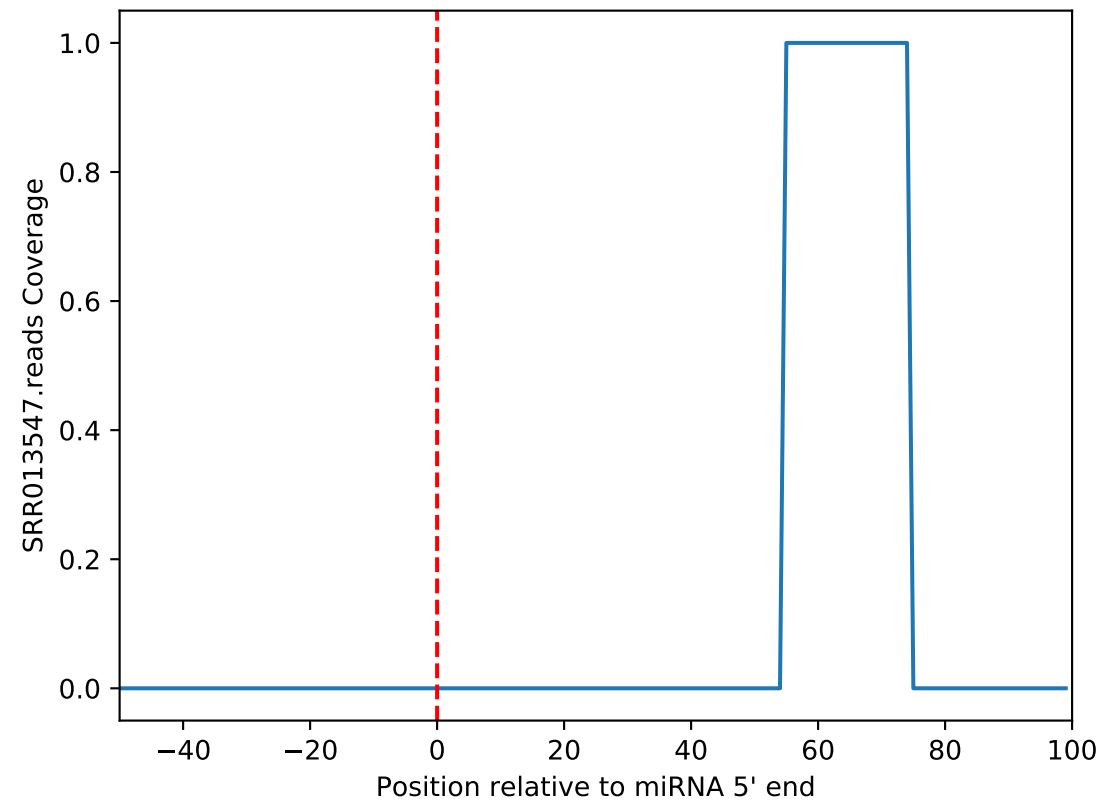

mir-4987 (chr2L:10840447(-))

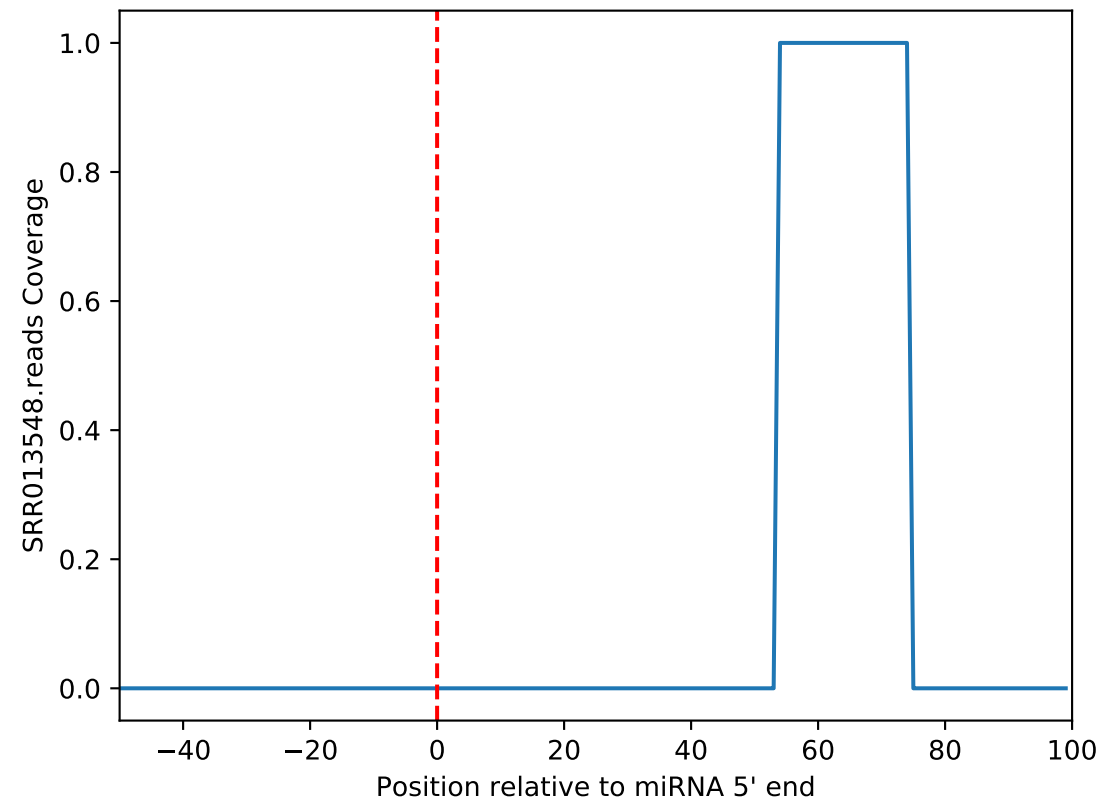

mir-4977 (chr2R:7406814(-))

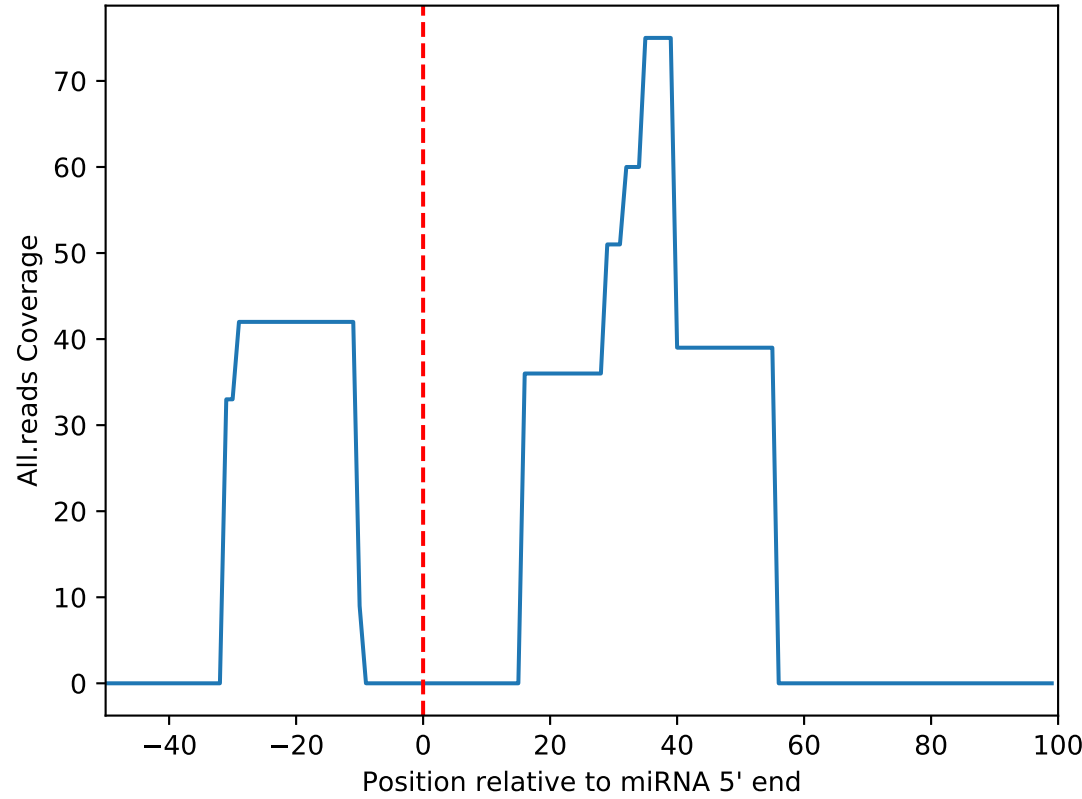

mir-4977 (chr2R:7406814(-))

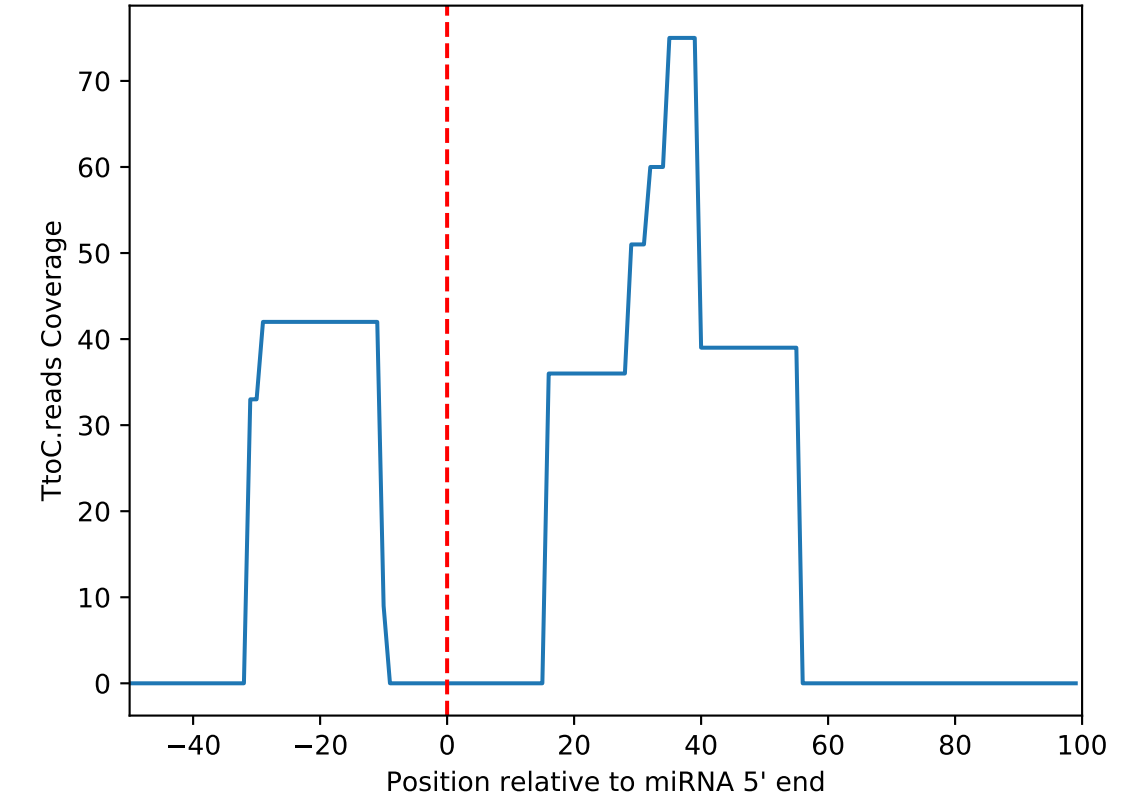

mir-4977 (chr2R:7406814(-))

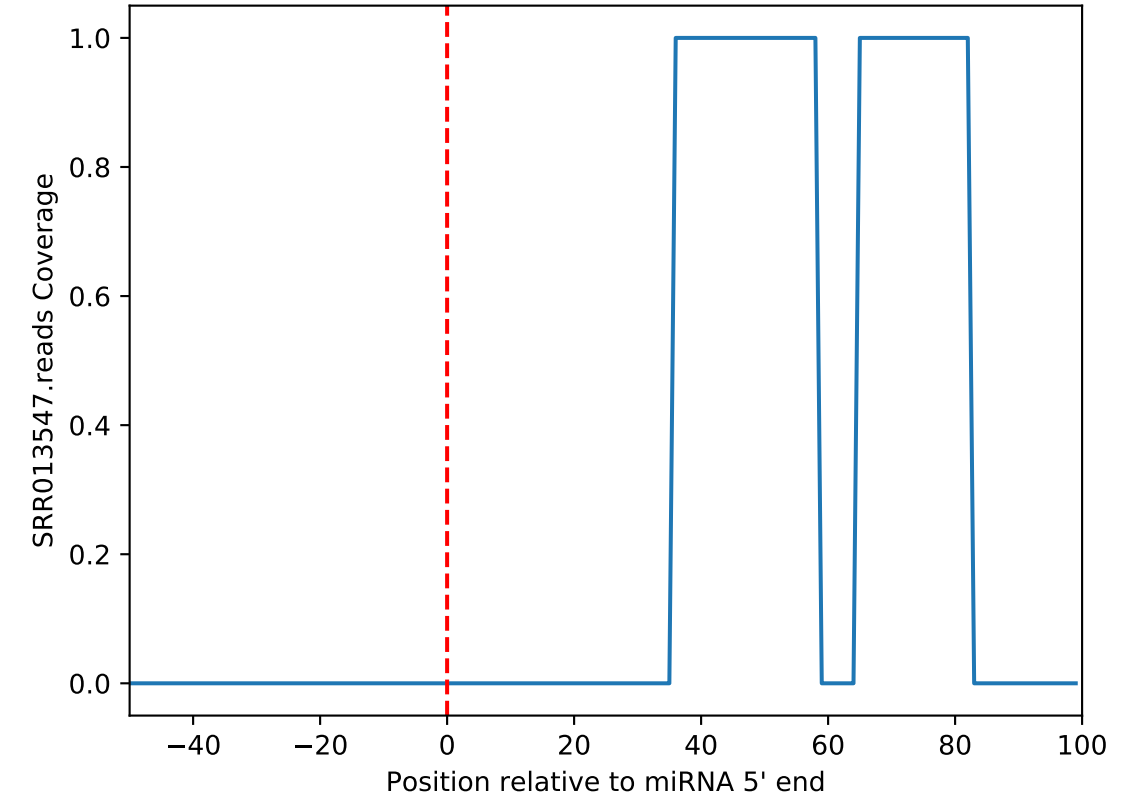

mir-4977 (chr2R:7406814(-))





mir-4961 (chrX:1373652(+))

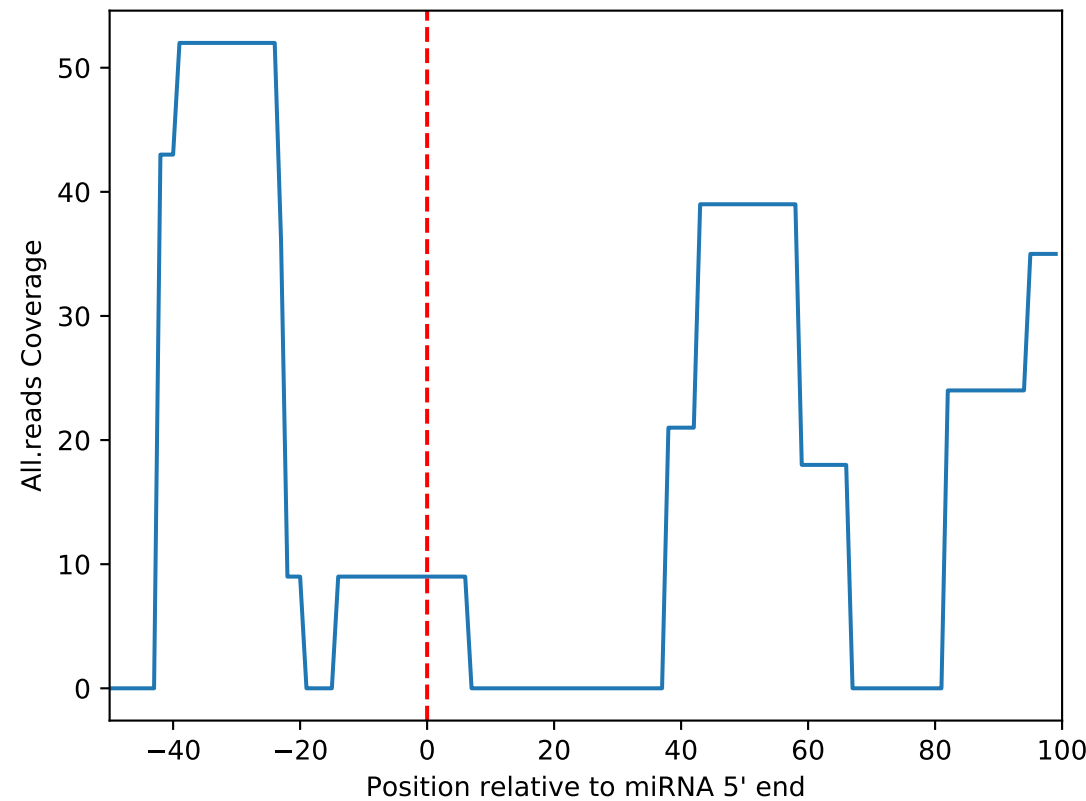

mir-4961 (chrX:1373652(+))

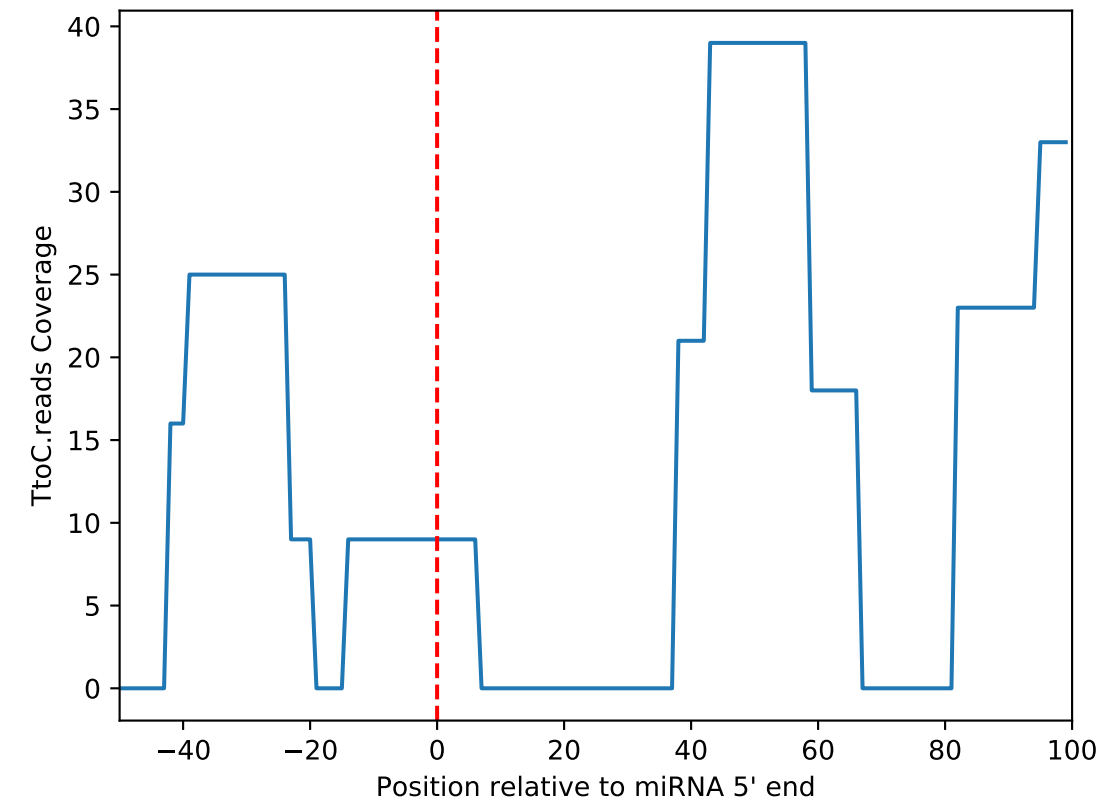

mir-4961 (chrX:1373652(+))

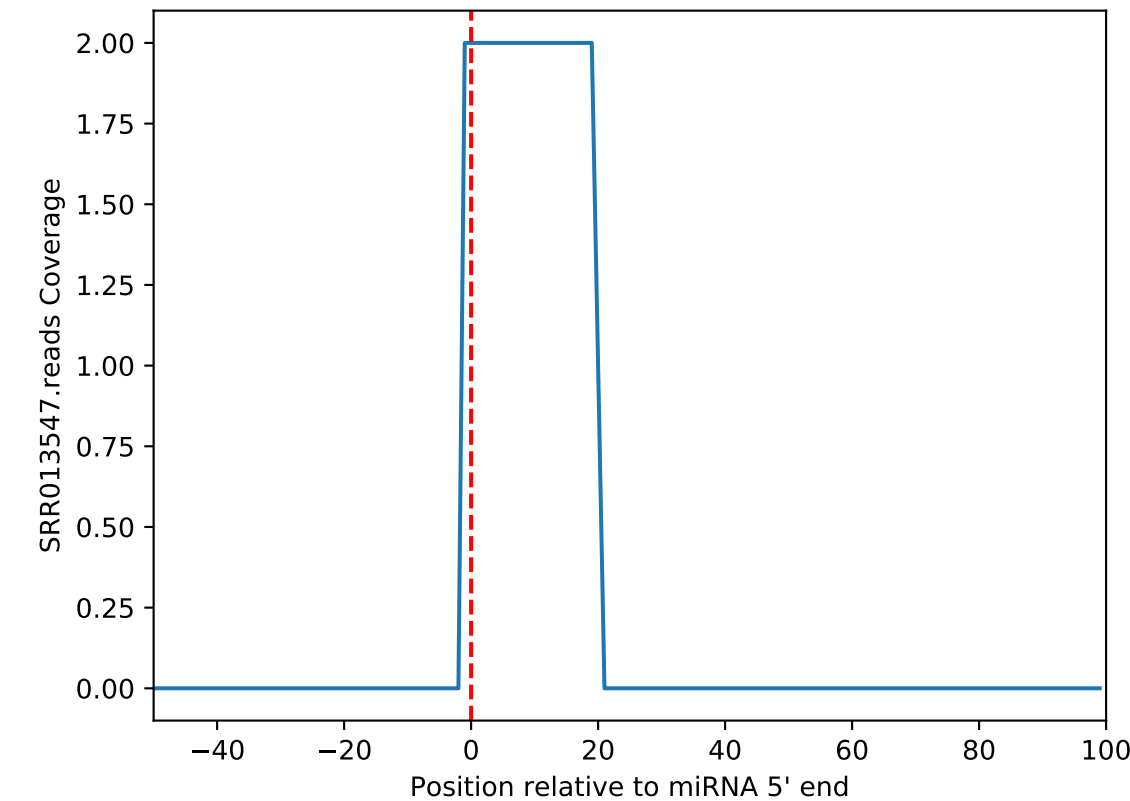

mir-4961 (chrX:1373652(+))

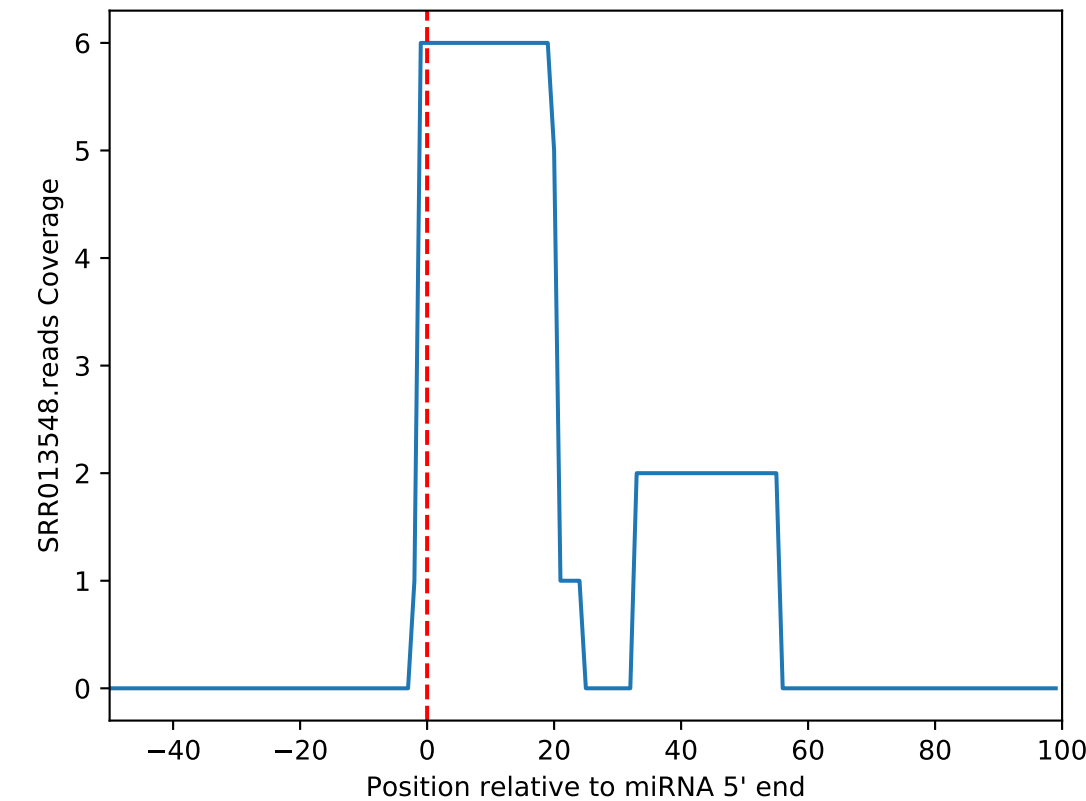

mir-979 (chrX:19561859(+))

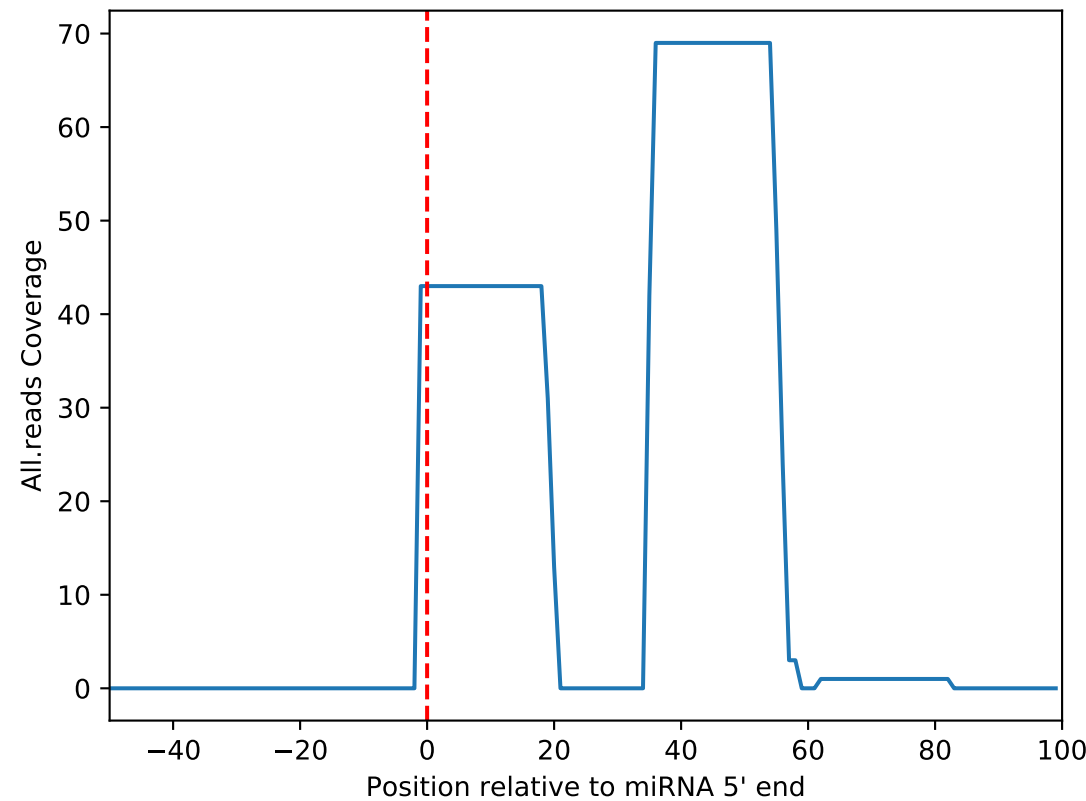

mir-979 (chrX:19561859(+))

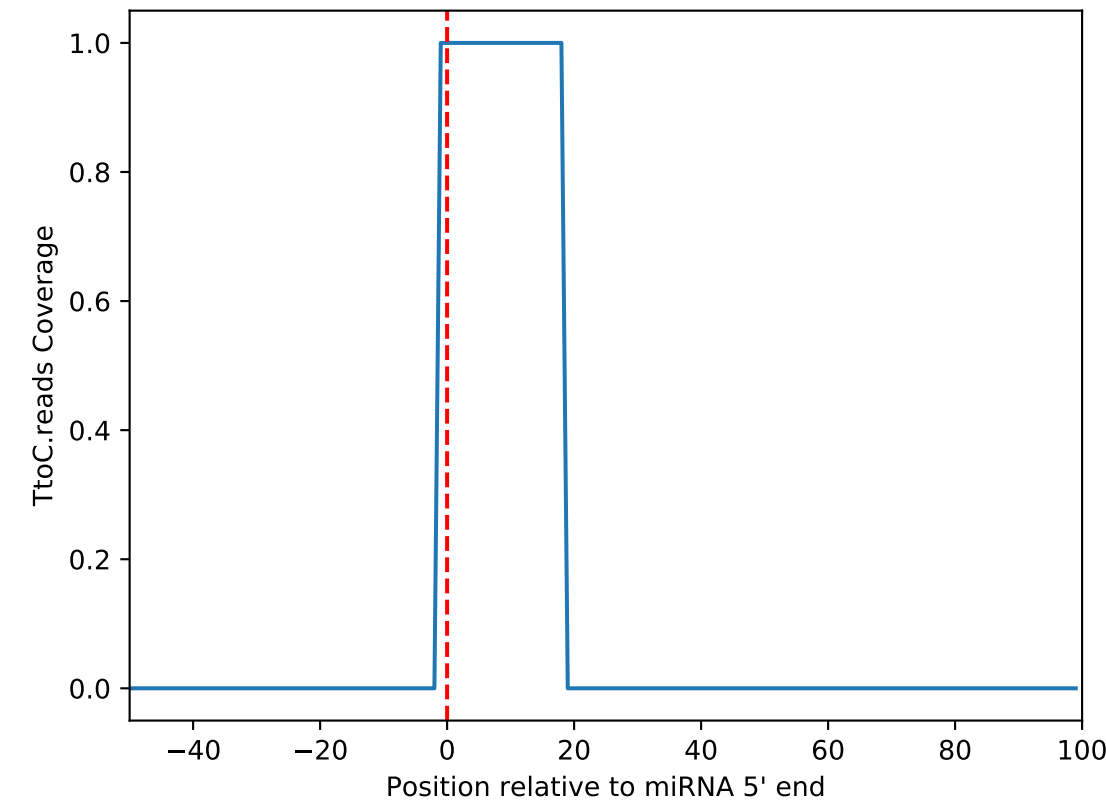

mir-979 (chrX:19561859(+))

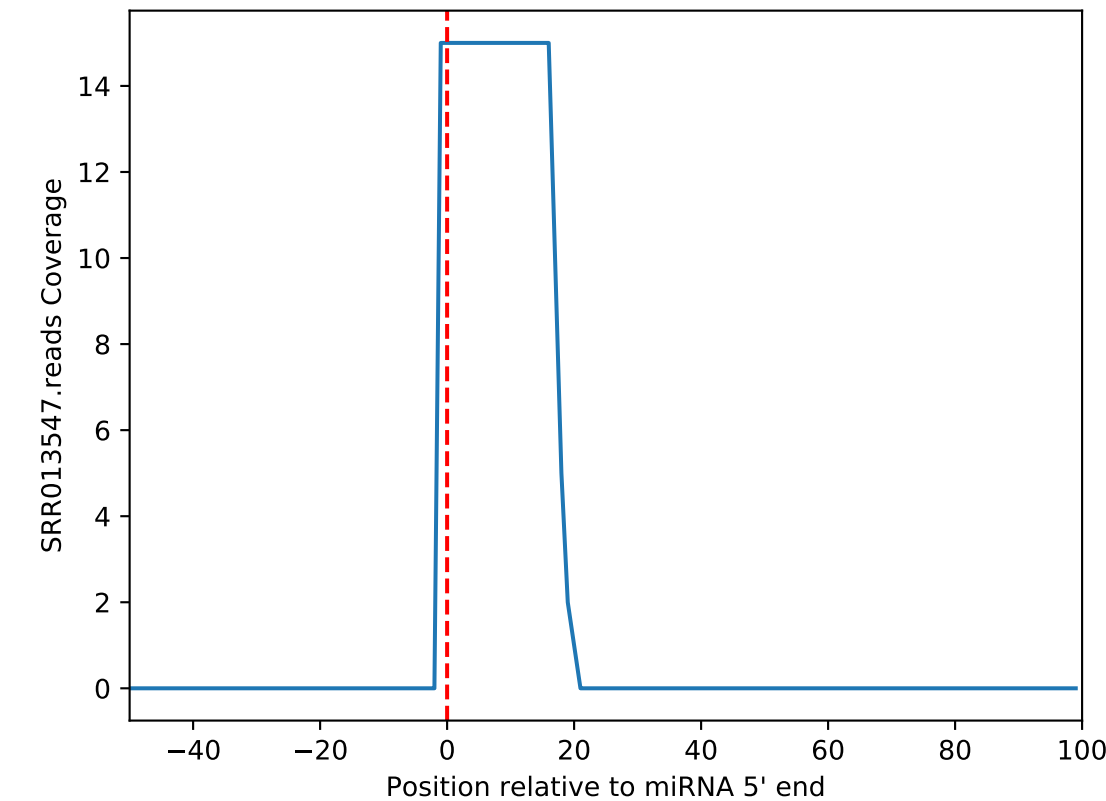

mir-979 (chrX:19561859(+))



mir-2281 (chr3R:14396481(-))

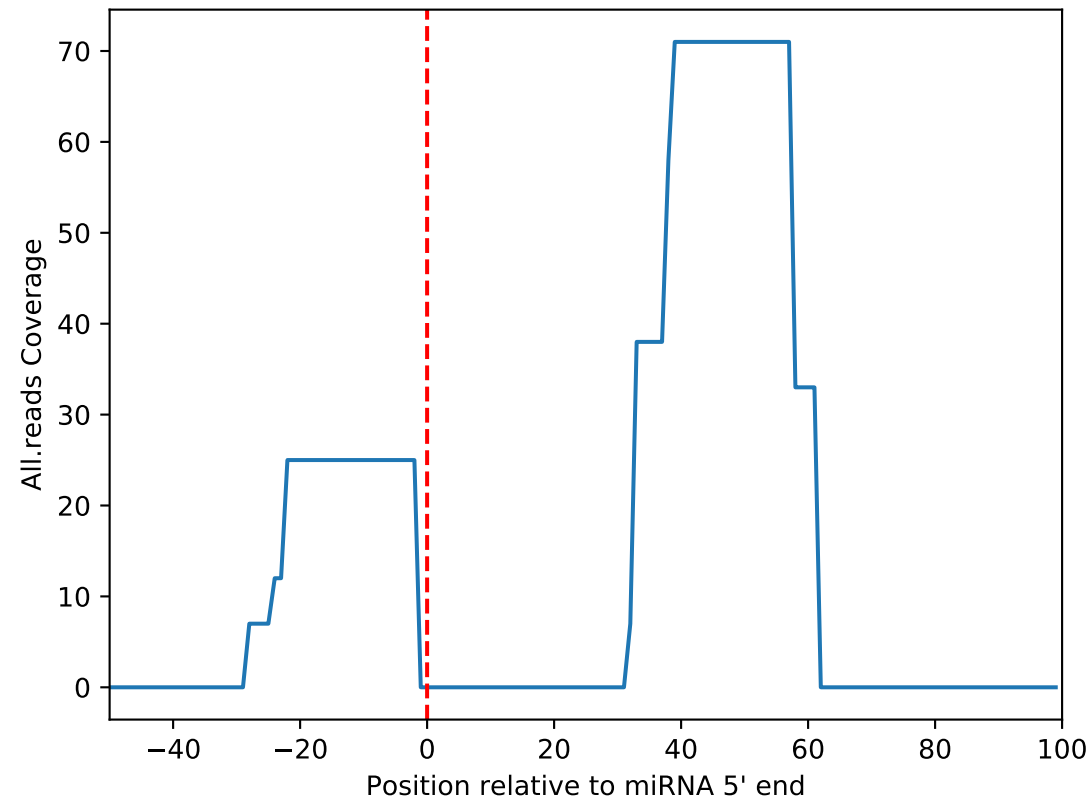

mir-2281 (chr3R:14396481(-))

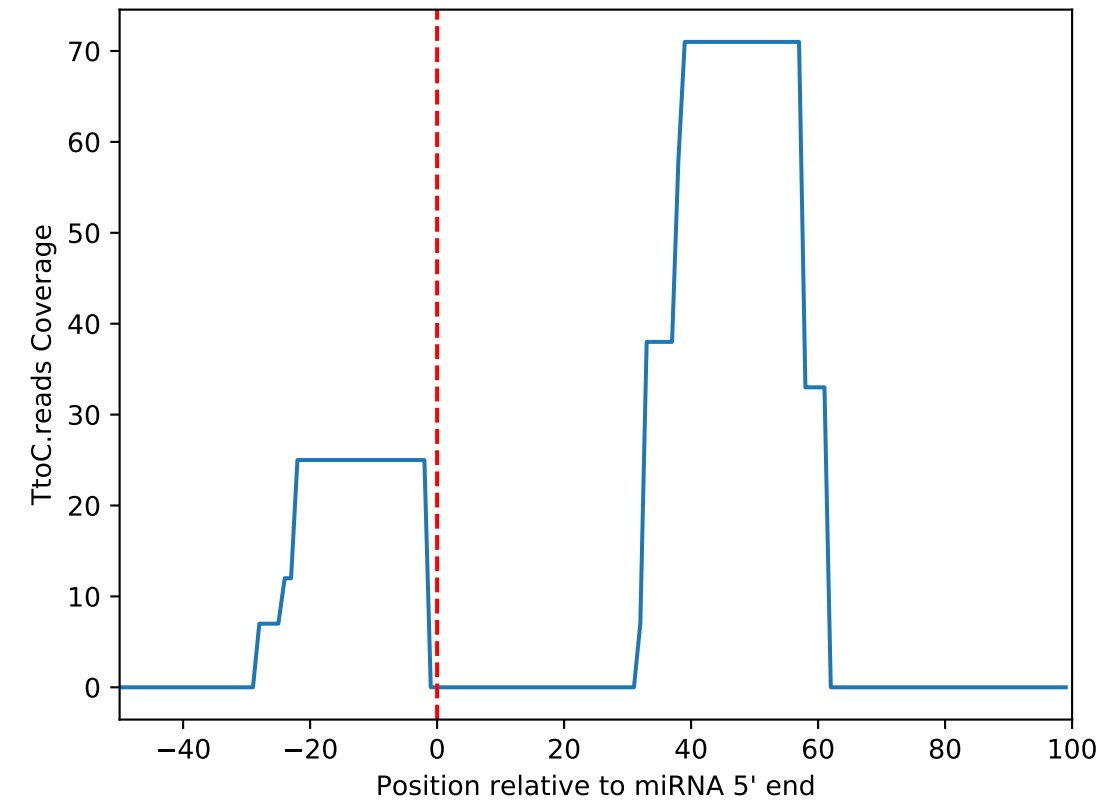

mir-2281 (chr3R:14396481(-))

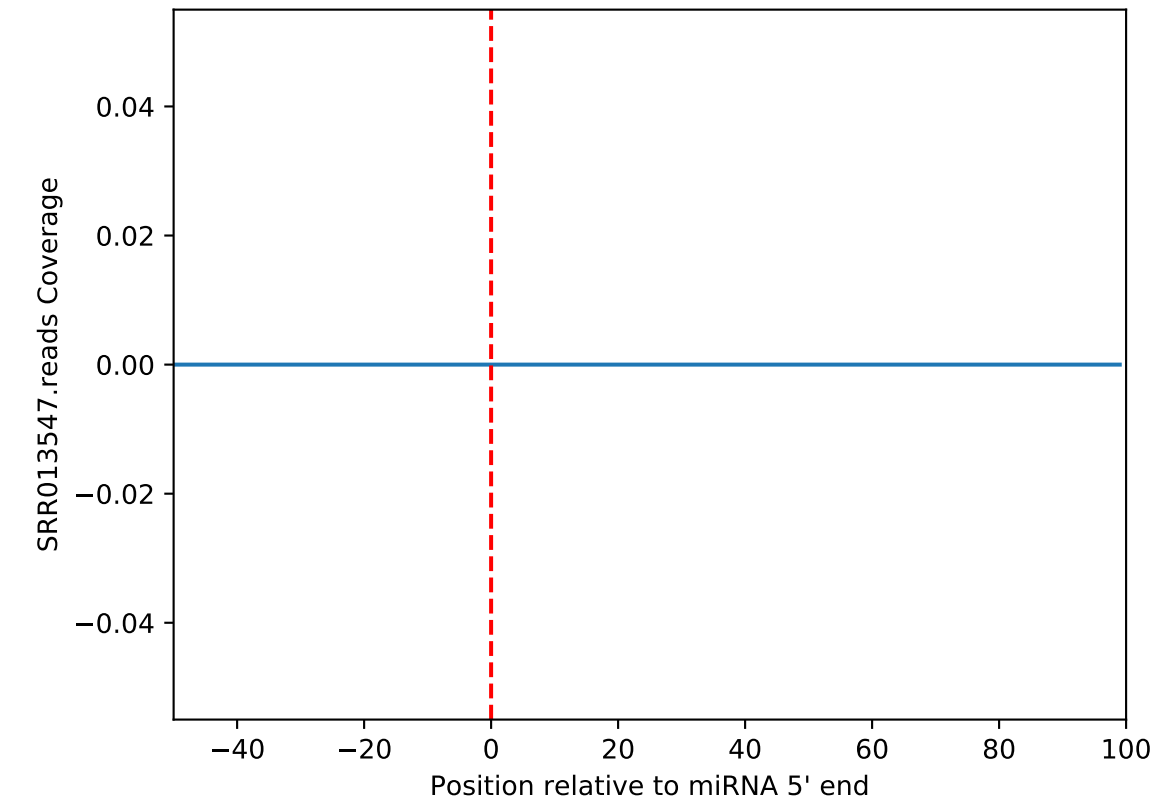

mir-2281 (chr3R:14396481(-))

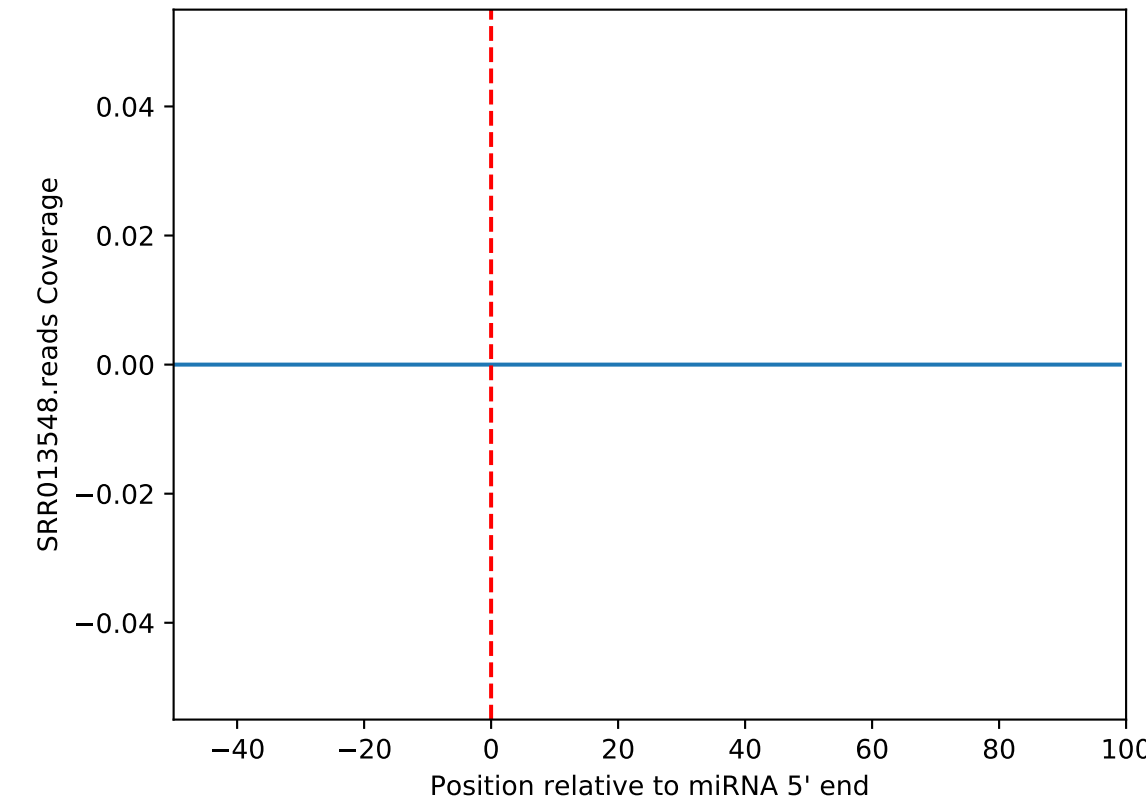

mir-124 (chr2L:17566392(+))

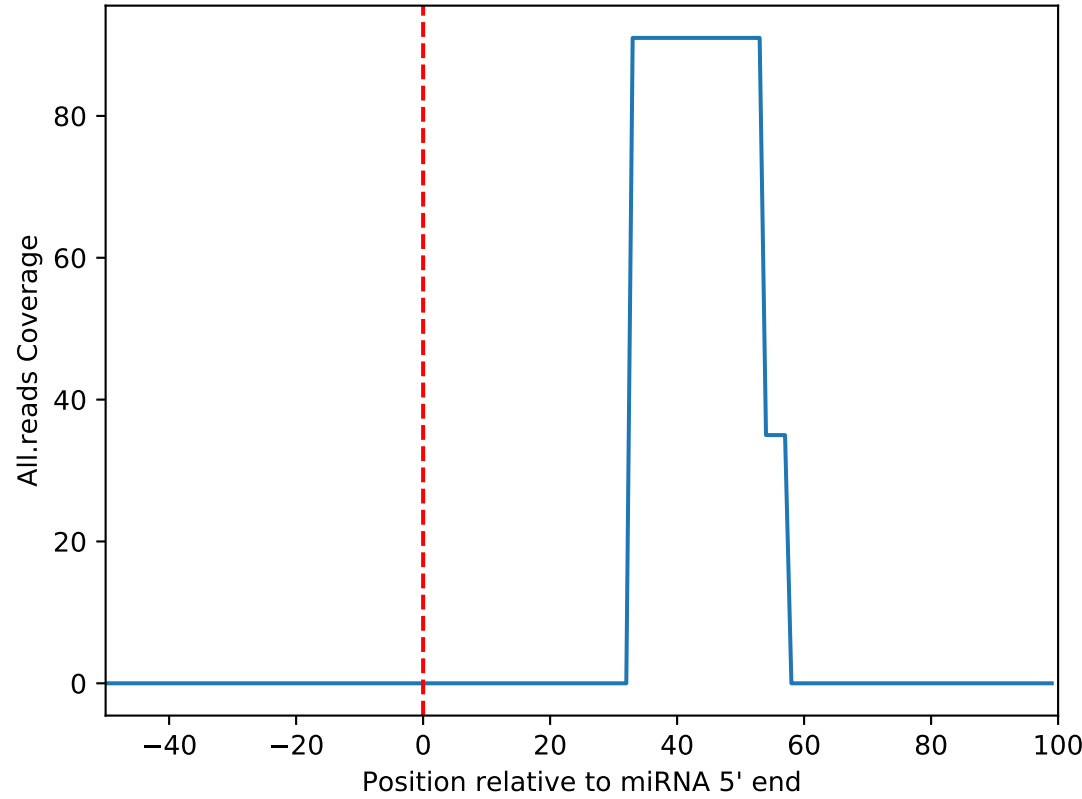

mir-124 (chr2L:17566392(+))



mir-124 (chr2L:17566392(+))

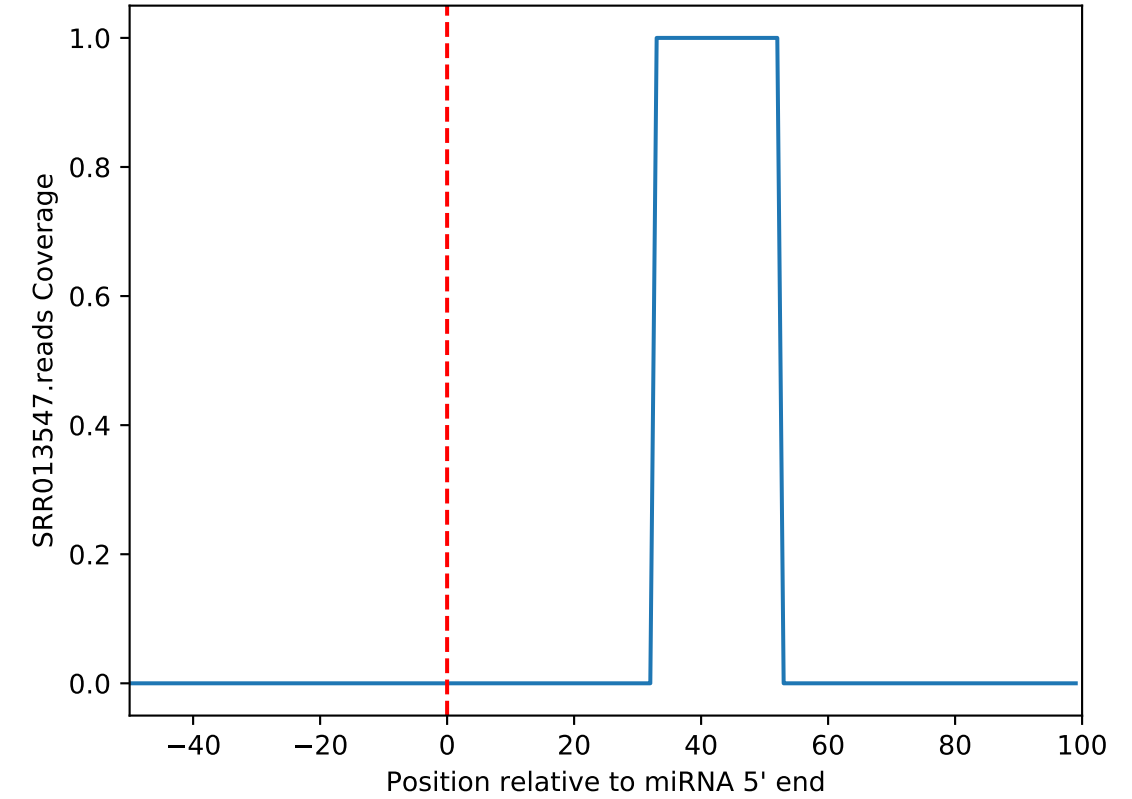

mir-124 (chr2L:17566392(+))



mir-190 (chr3L:8571822(+))

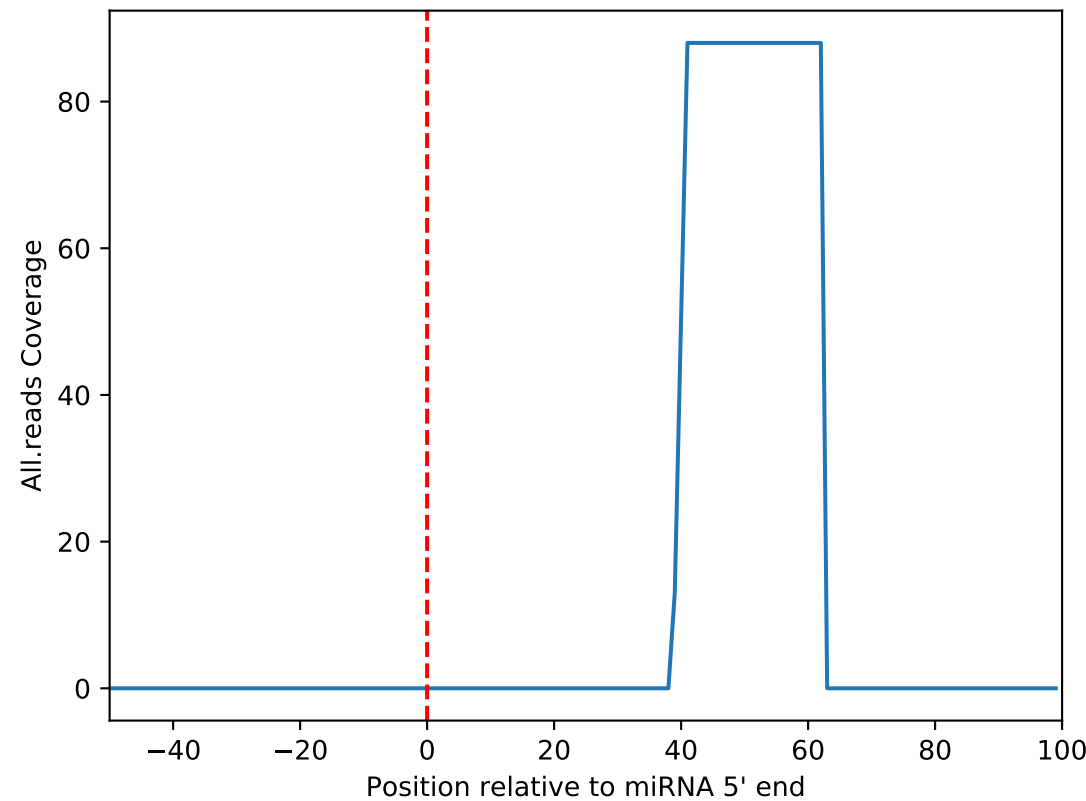

mir-190 (chr3L:8571822(+))

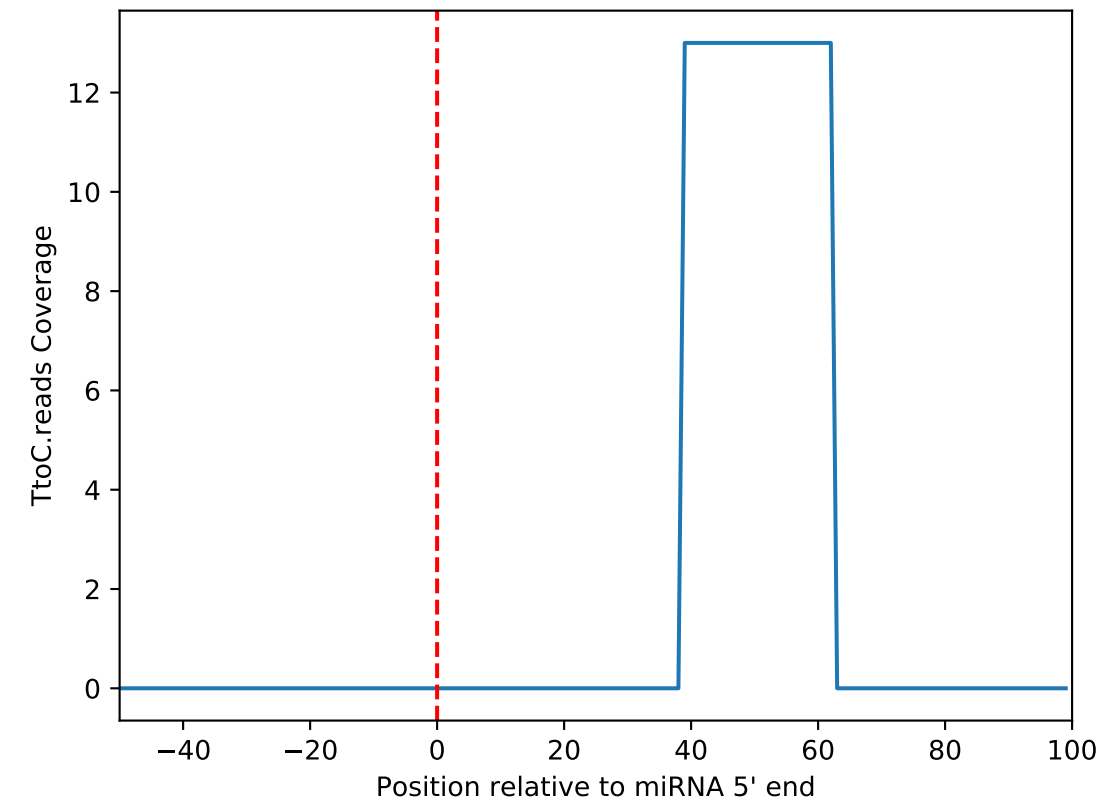

mir-190 (chr3L:8571822(+))

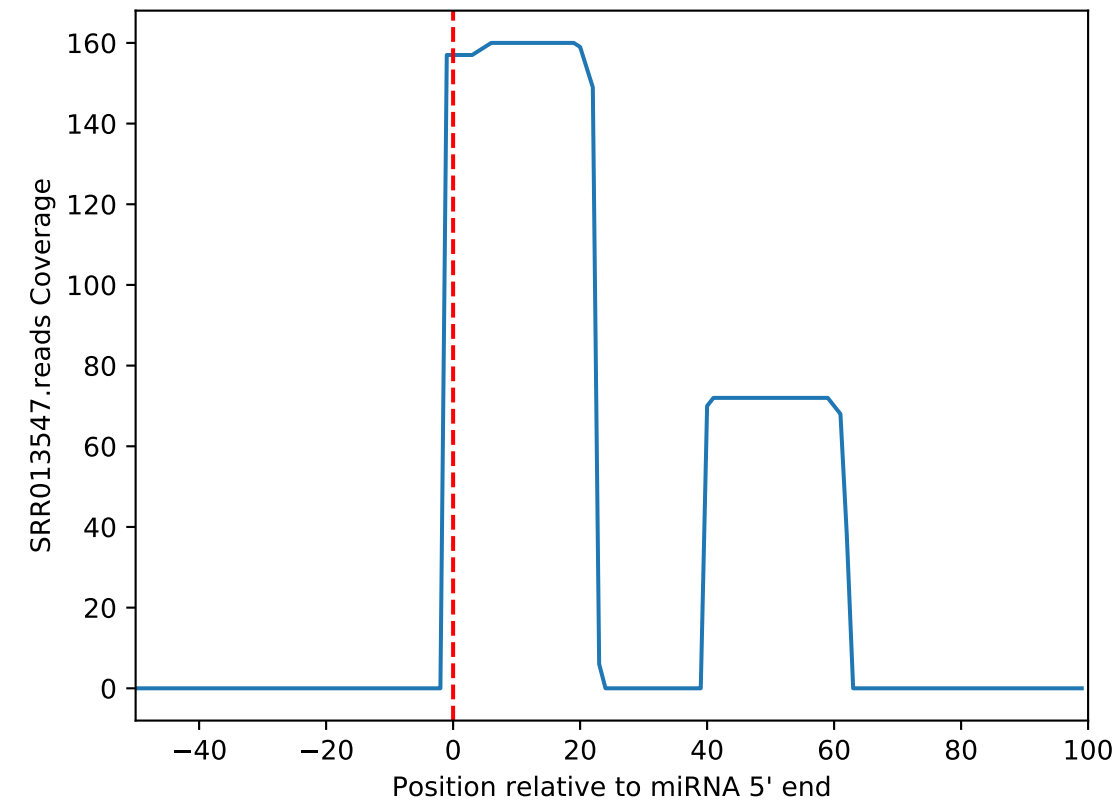

mir-190 (chr3L:8571822(+))

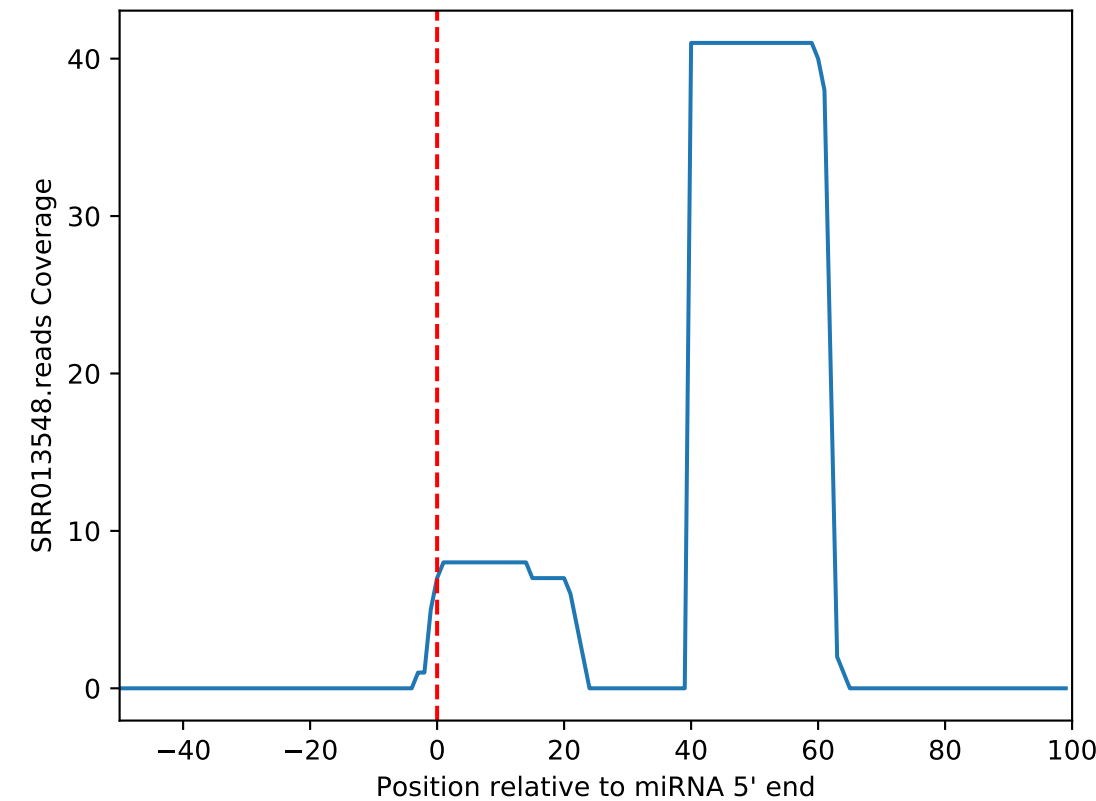

mir-281-1 (chr2R:12170449(-))

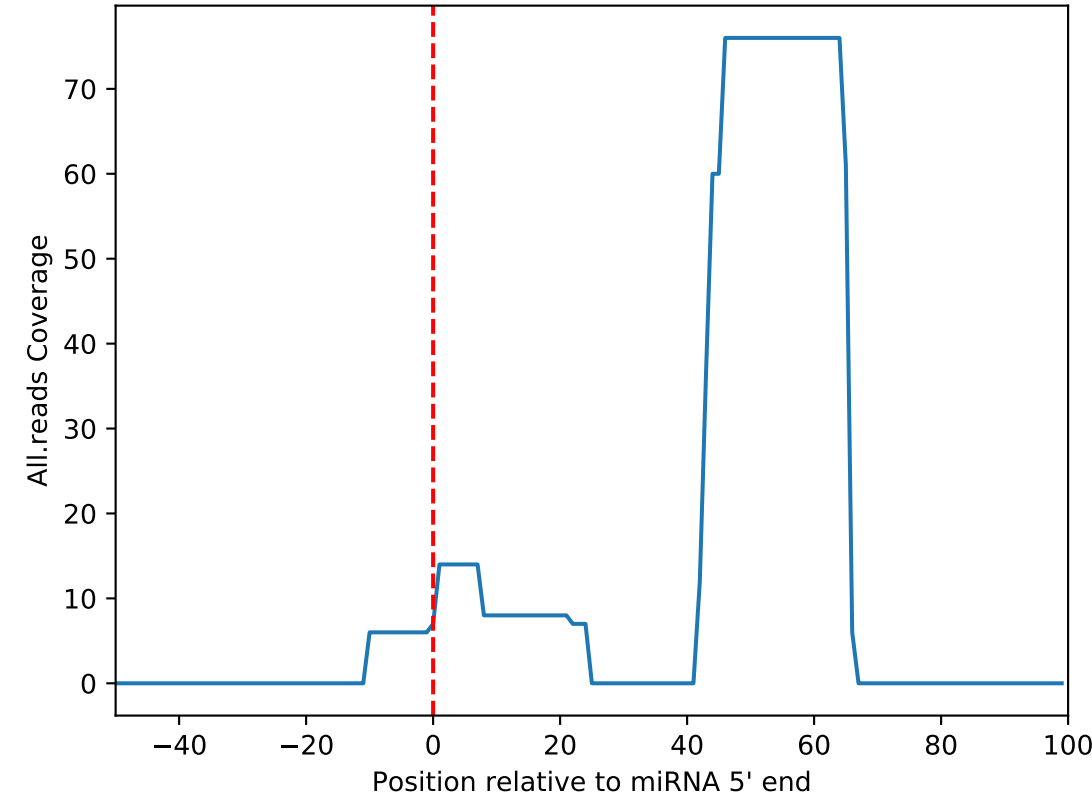

mir-281-1 (chr2R:12170449(-))

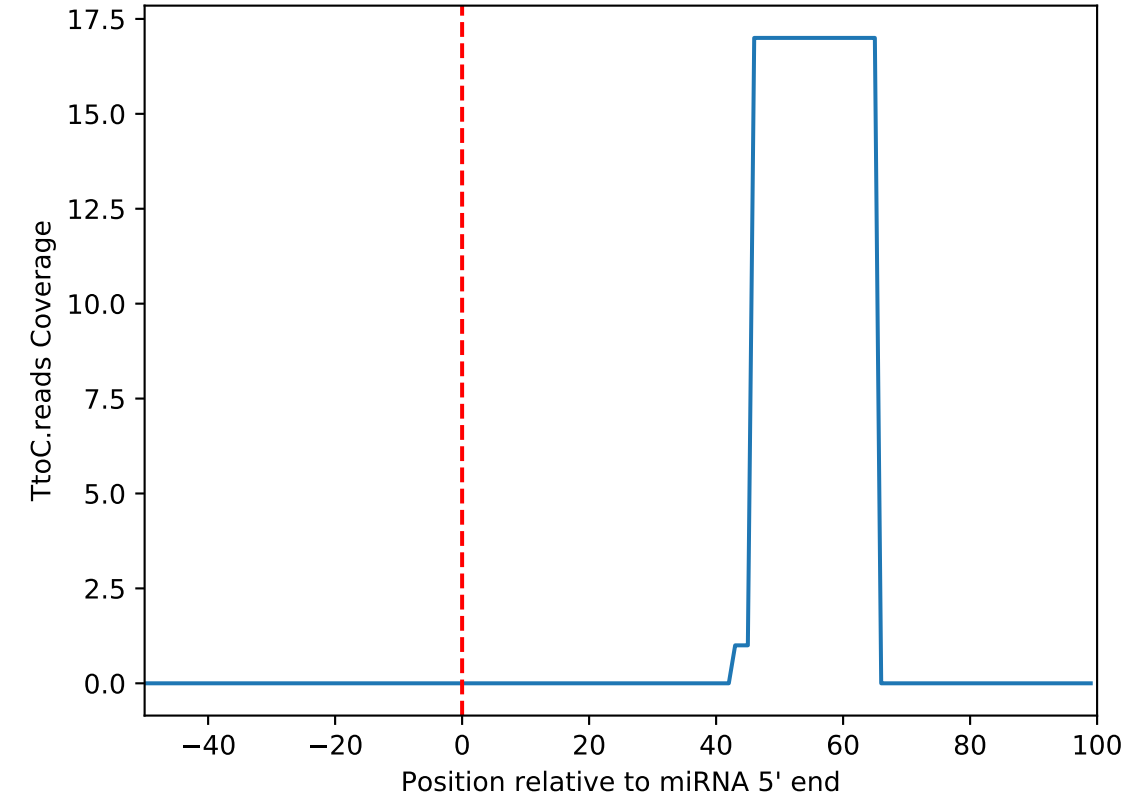

mir-281-1 (chr2R:12170449(-))

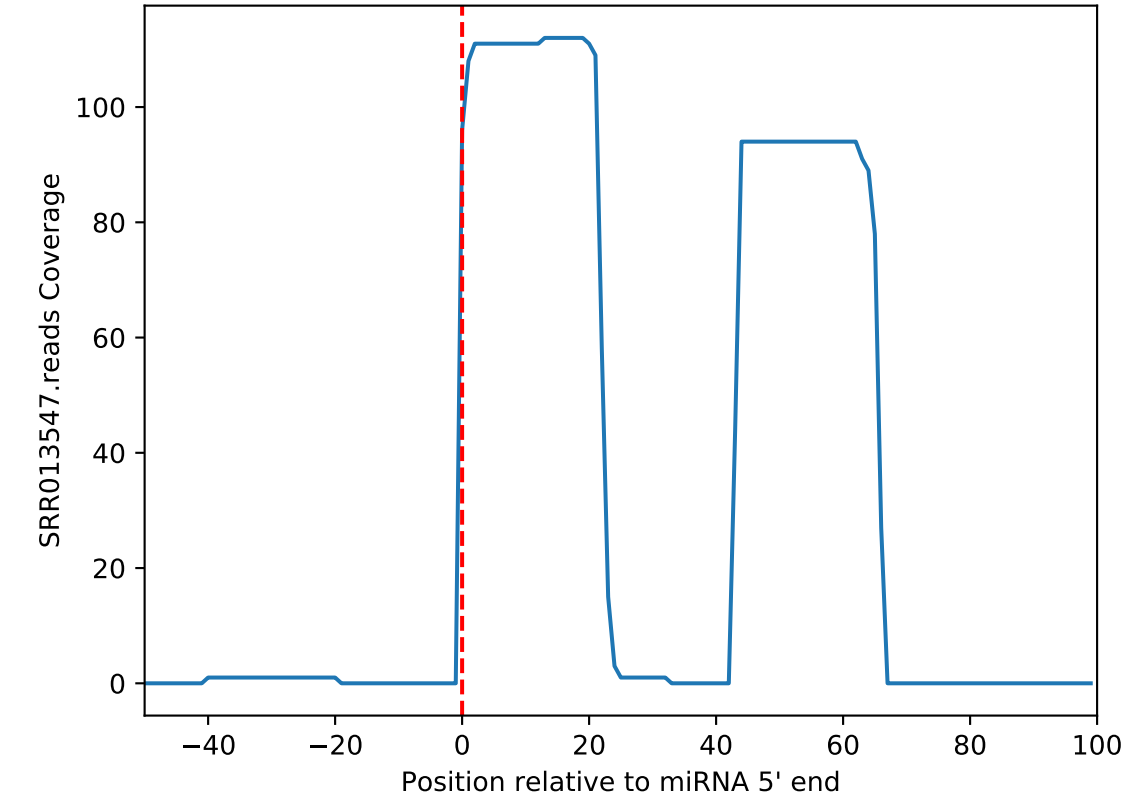

mir-281-1 (chr2R:12170449(-))

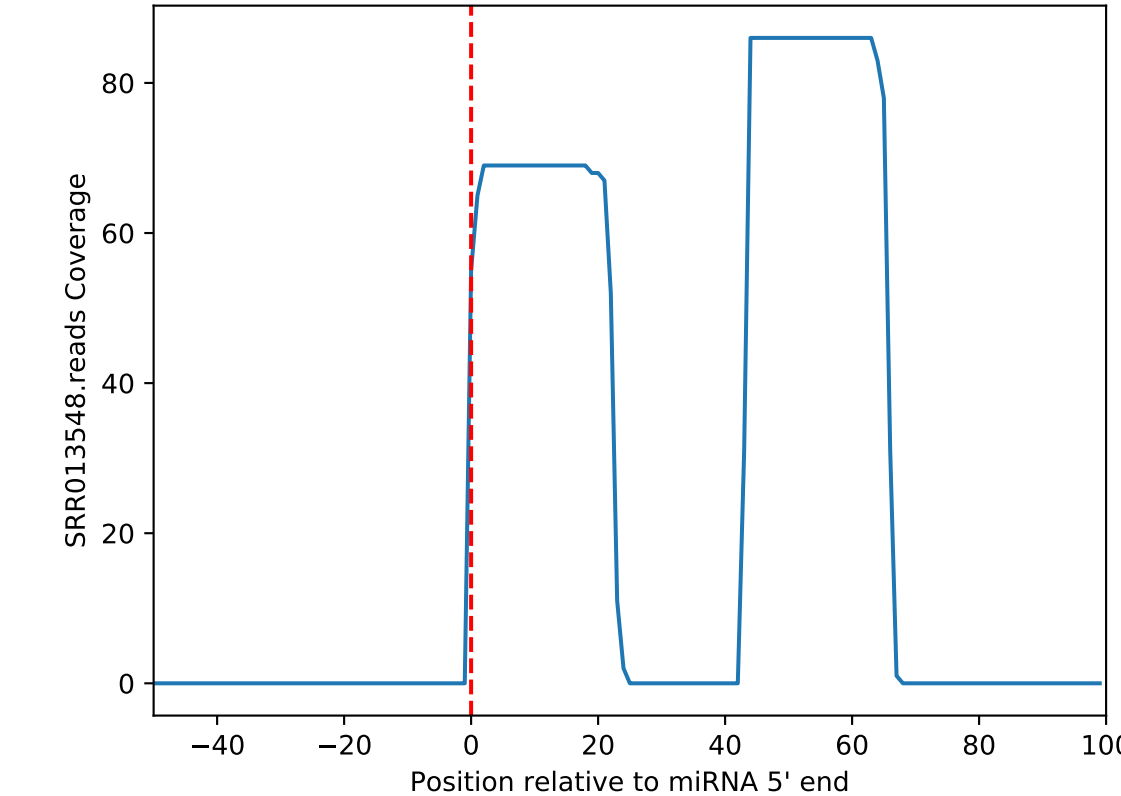

mir-997 (chr3R:19327137(-))

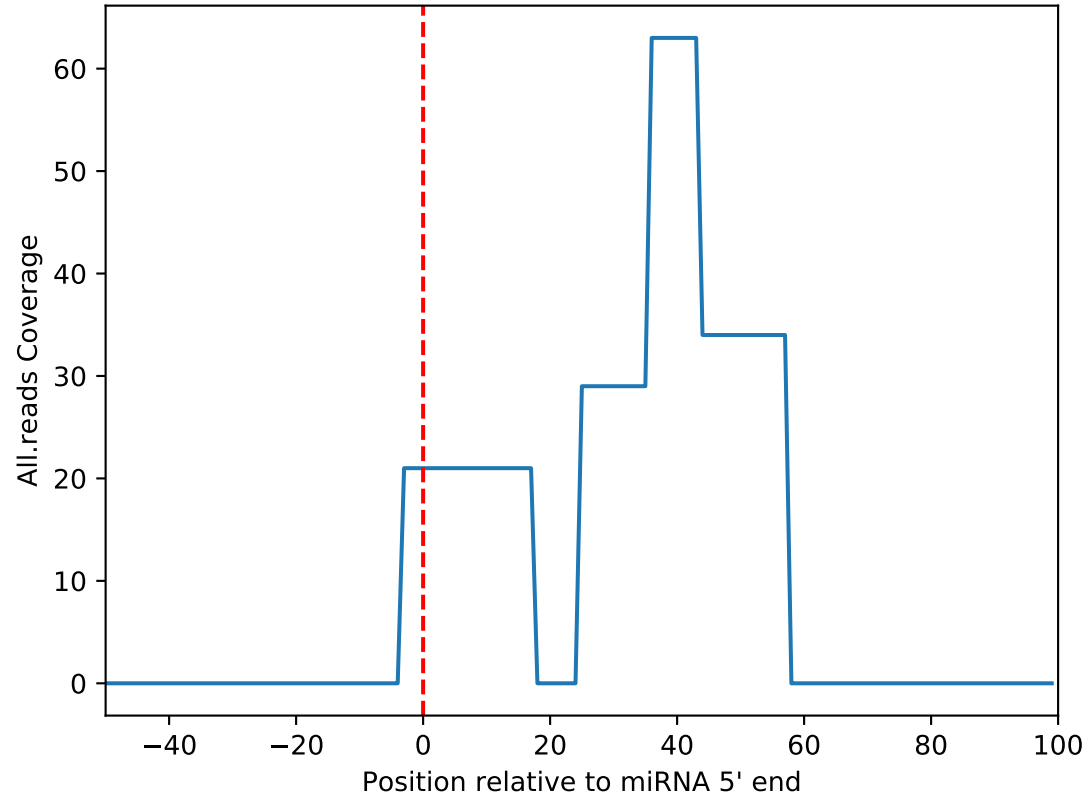

mir-997 (chr3R:19327137(-))



mir-997 (chr3R:19327137(-))



mir-997 (chr3R:19327137(-))



mir-31b (chrX:8993418(-))

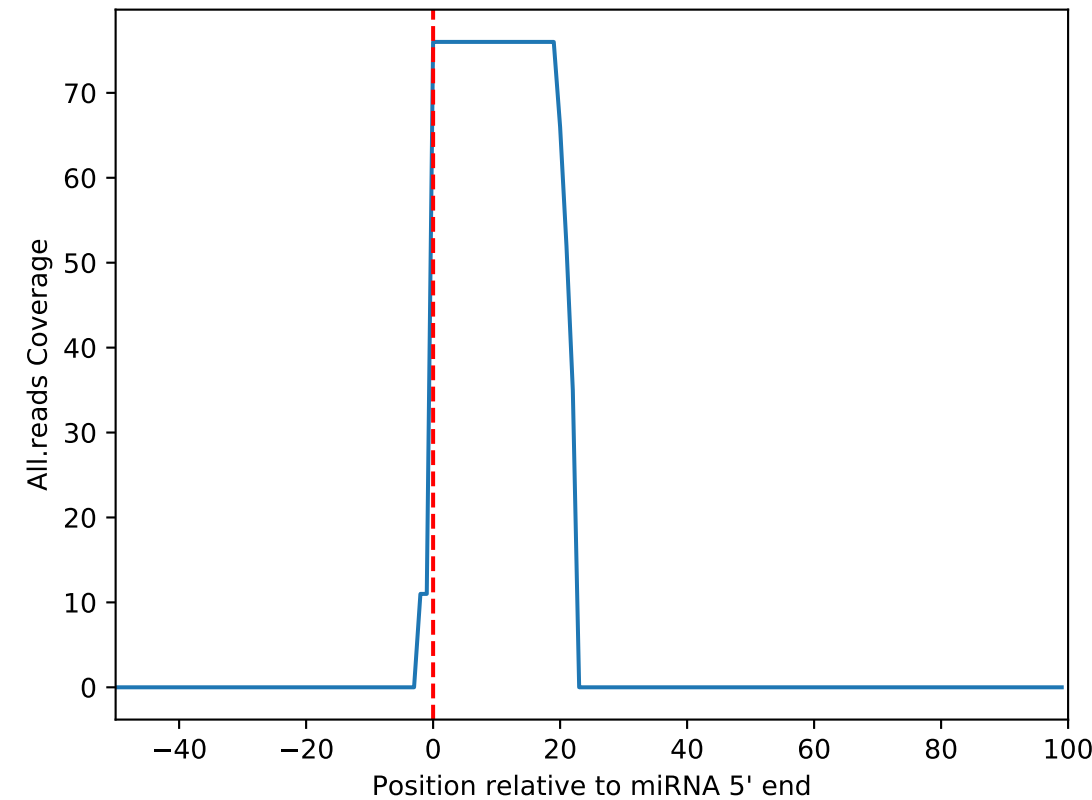

mir-31b (chrX:8993418(-))

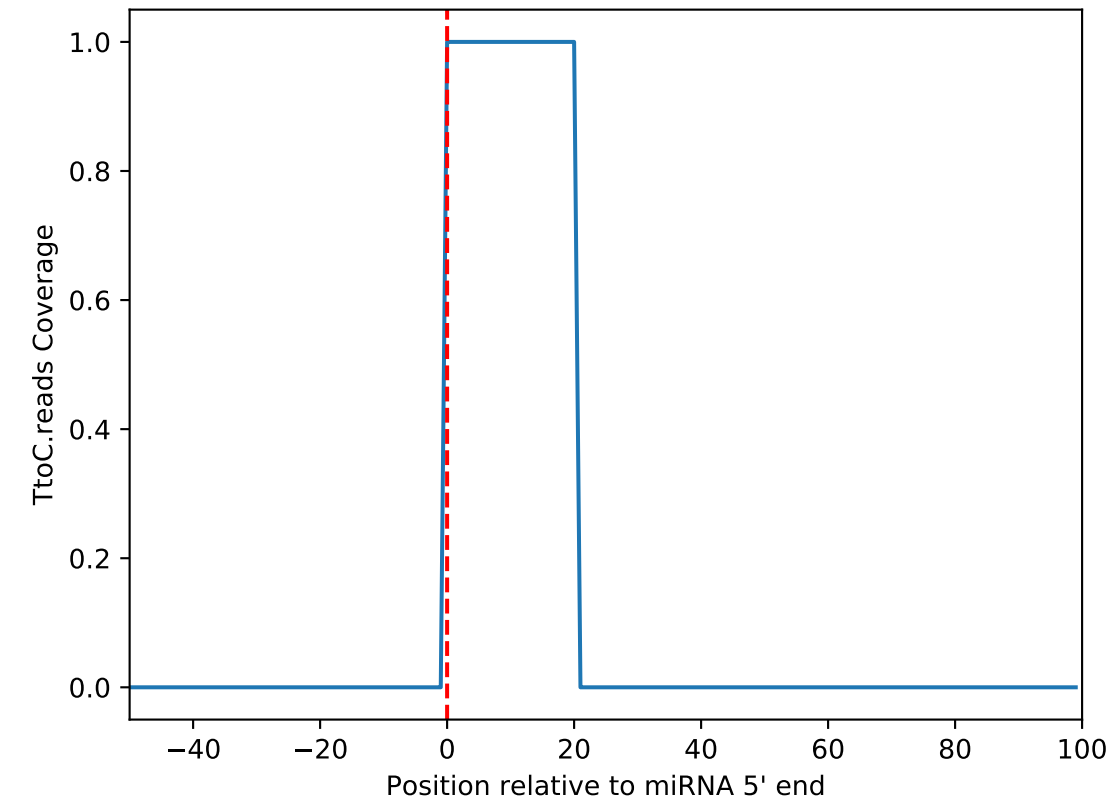

mir-31b (chrX:8993418(-))

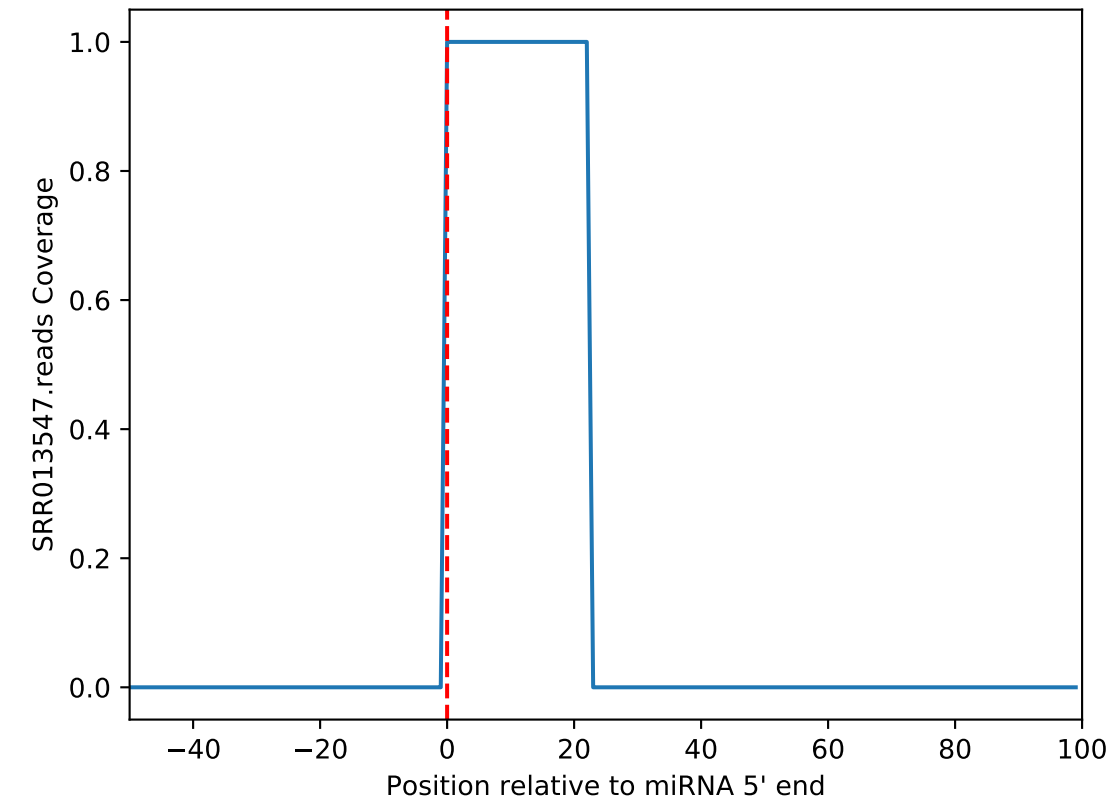

mir-31b (chrX:8993418(-))

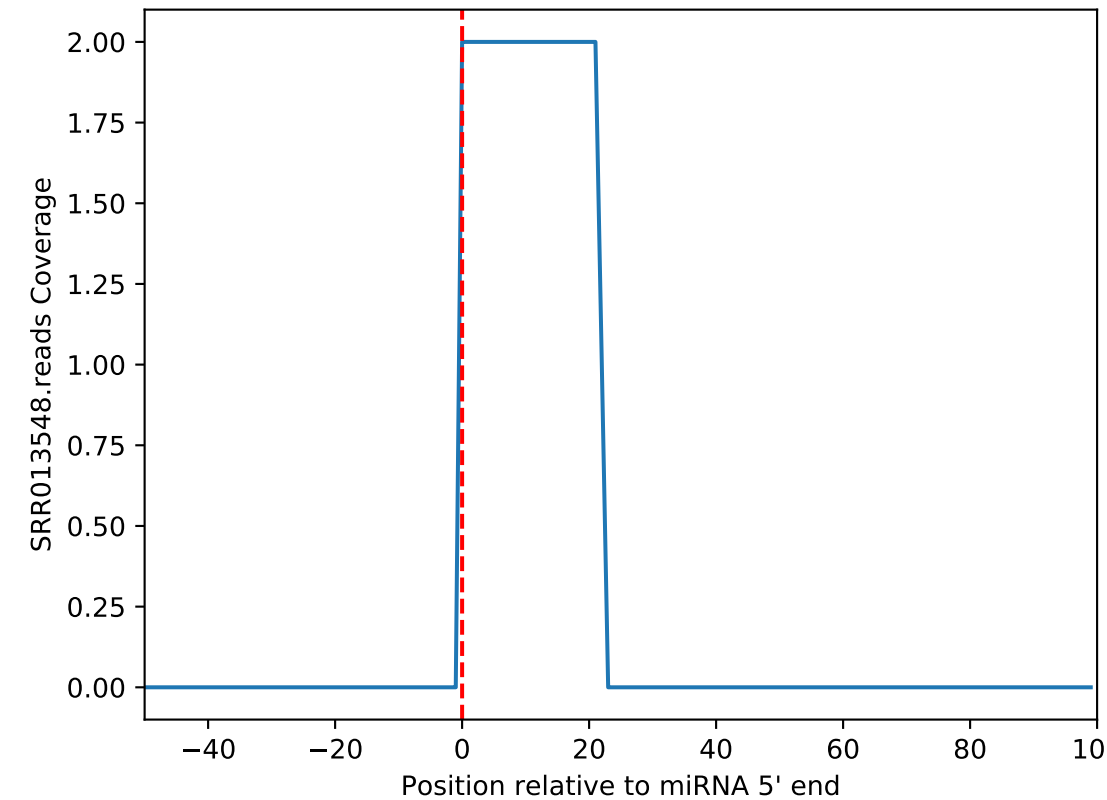



mir-1008 (chr2R:10885533(+))

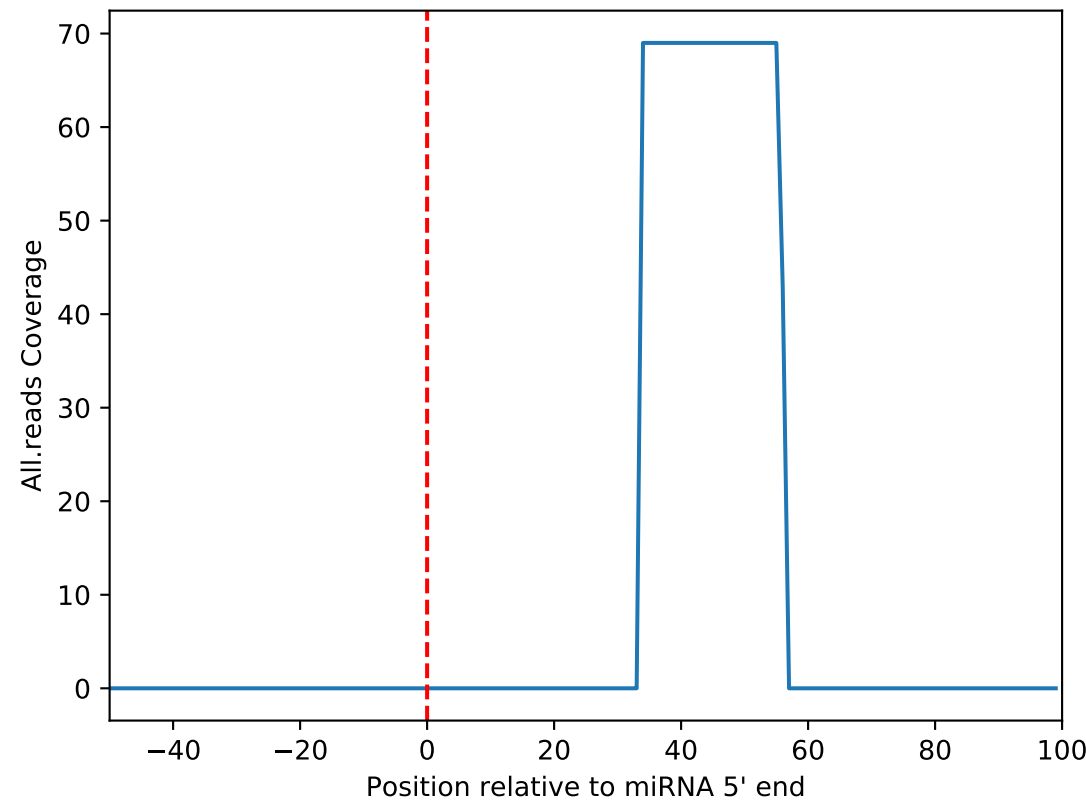

mir-1008 (chr2R:10885533(+))

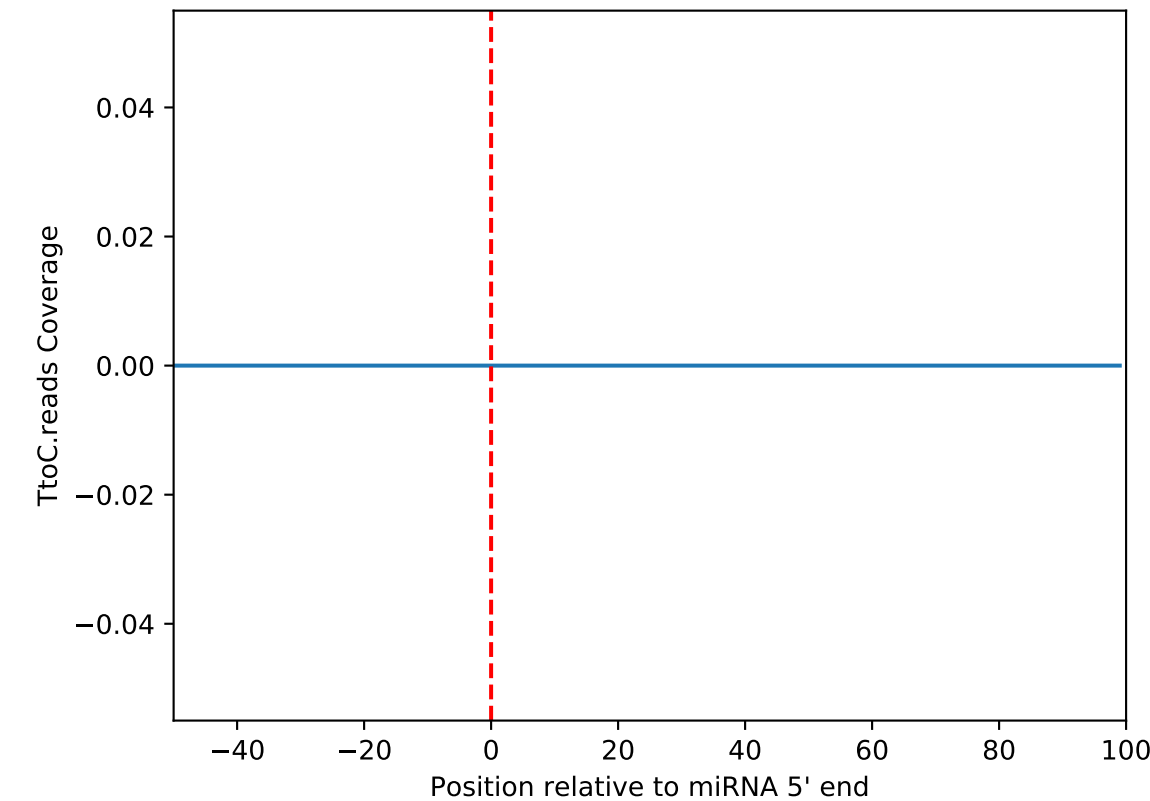

mir-1008 (chr2R:10885533(+))

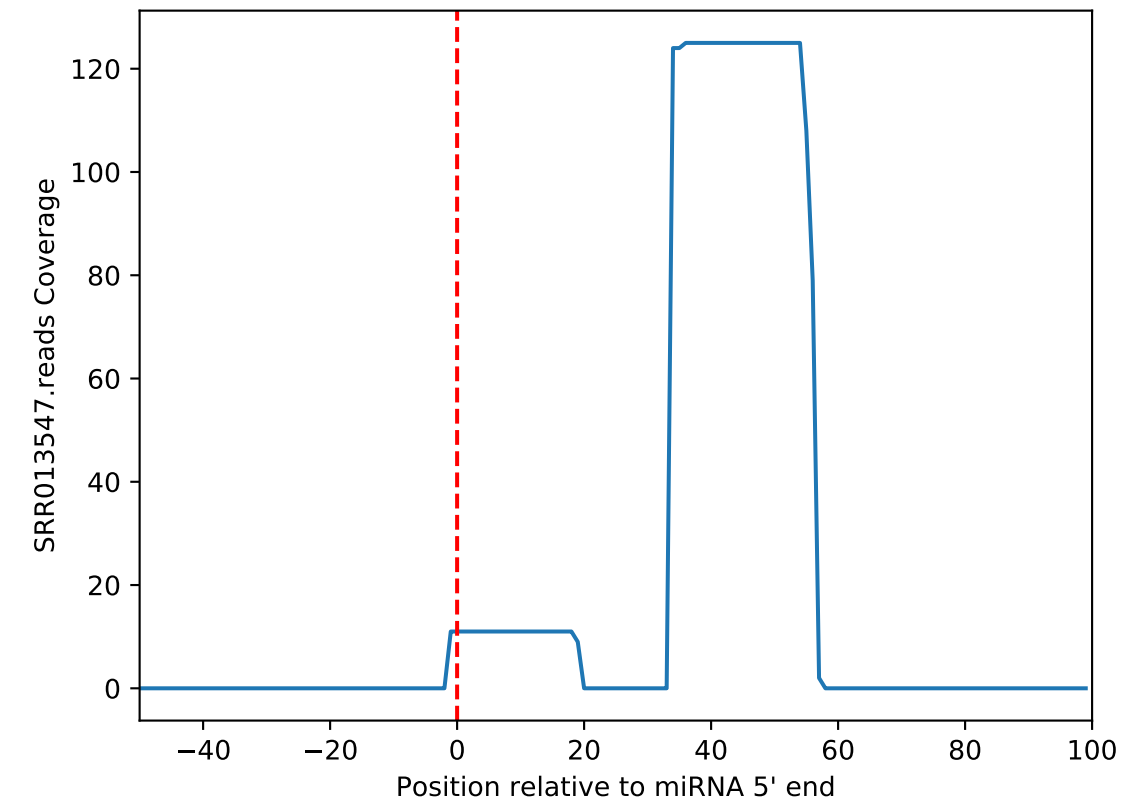

mir-1008 (chr2R:10885533(+))

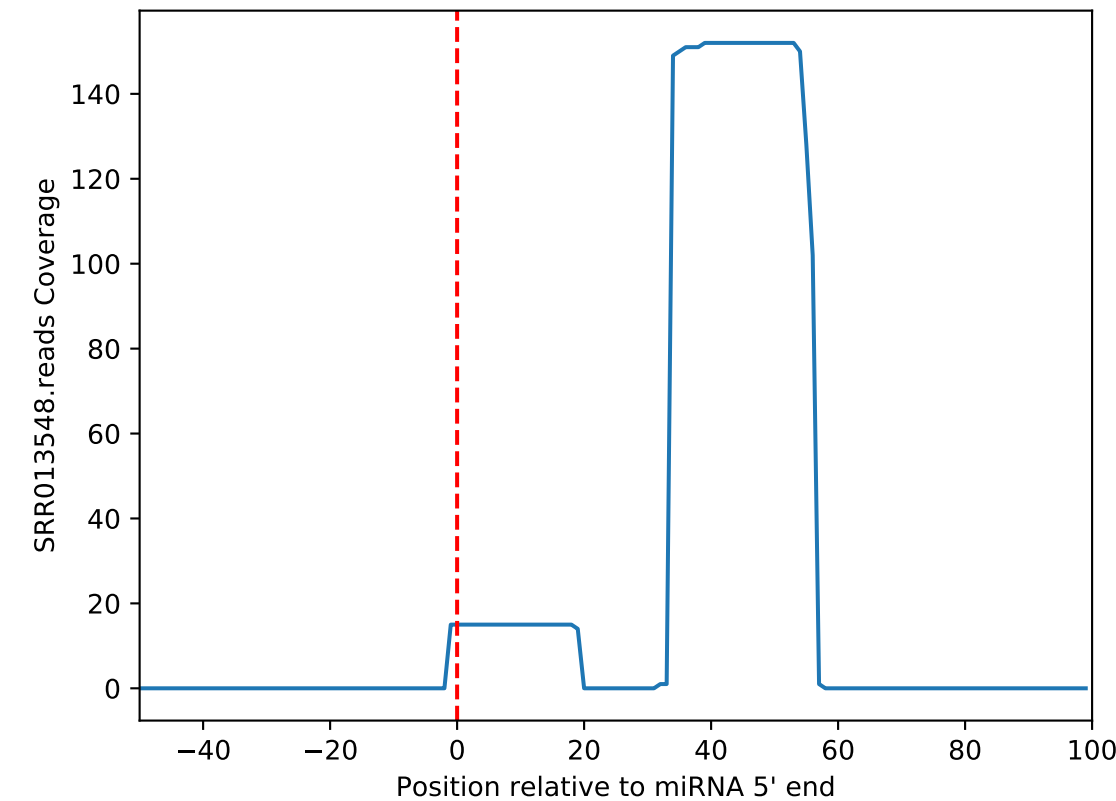

mir-9374 (chr2L:21238301(+))

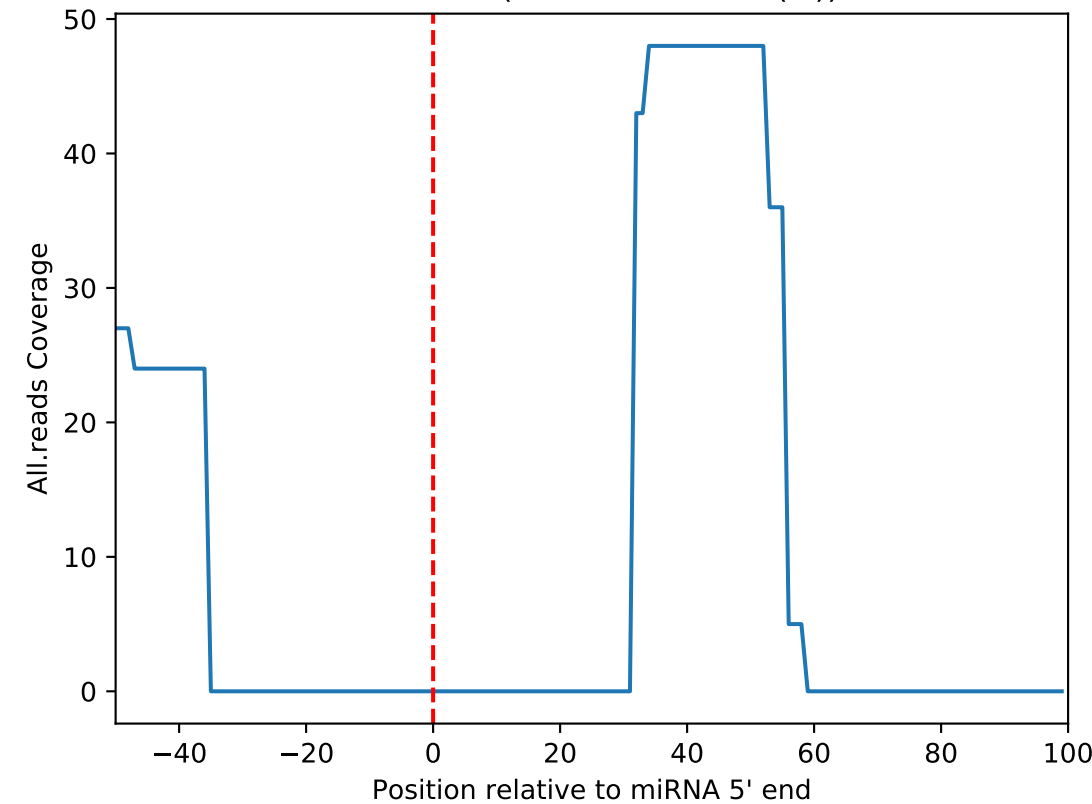

mir-9374 (chr2L:21238301(+))

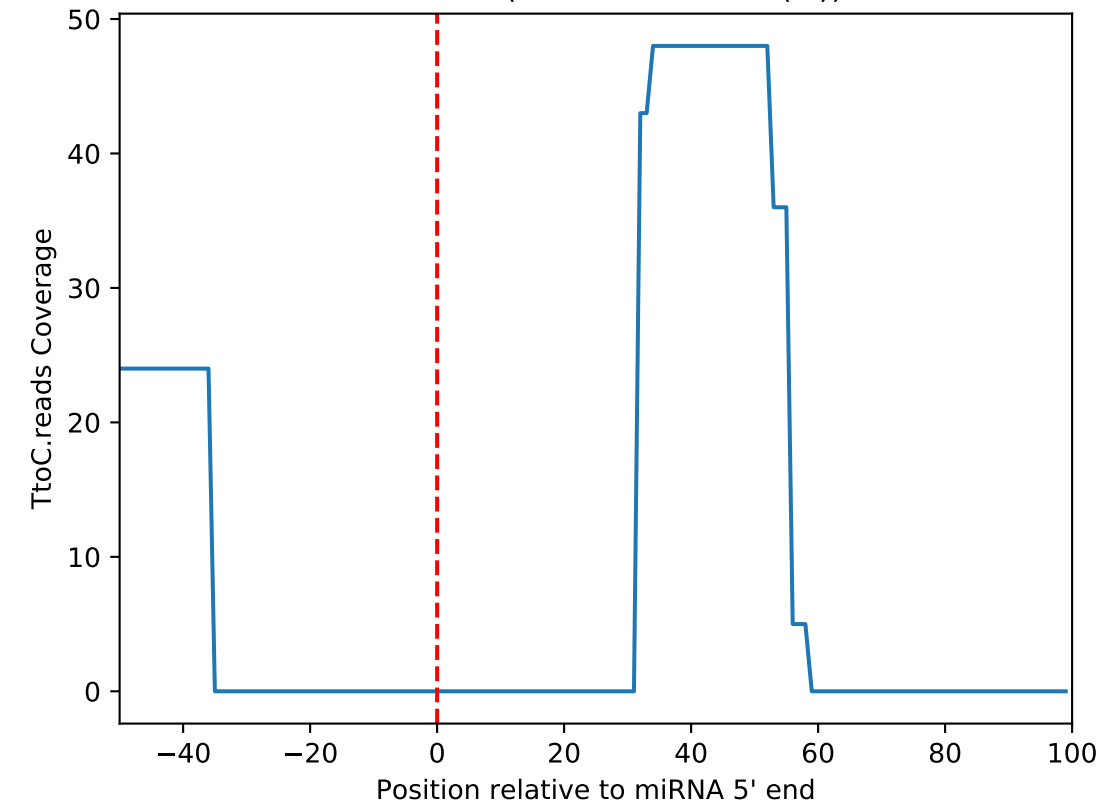

mir-9374 (chr2L:21238301(+))

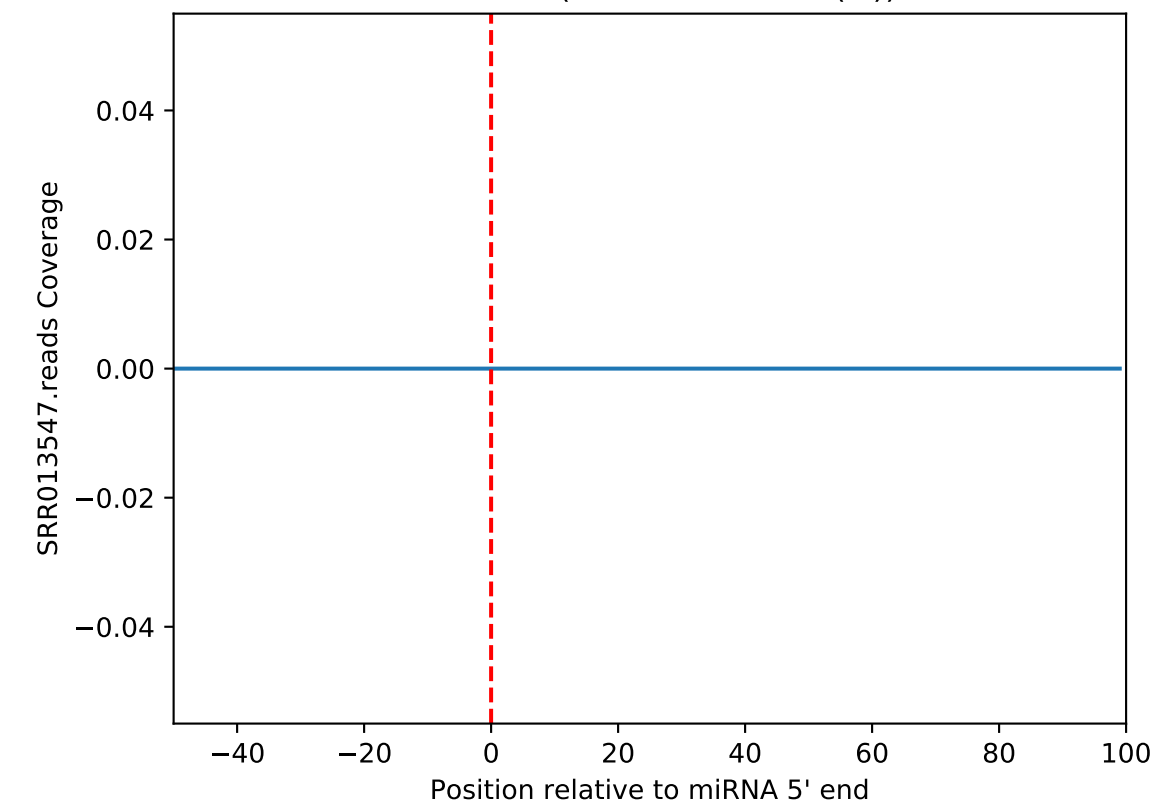

mir-9374 (chr2L:21238301(+))

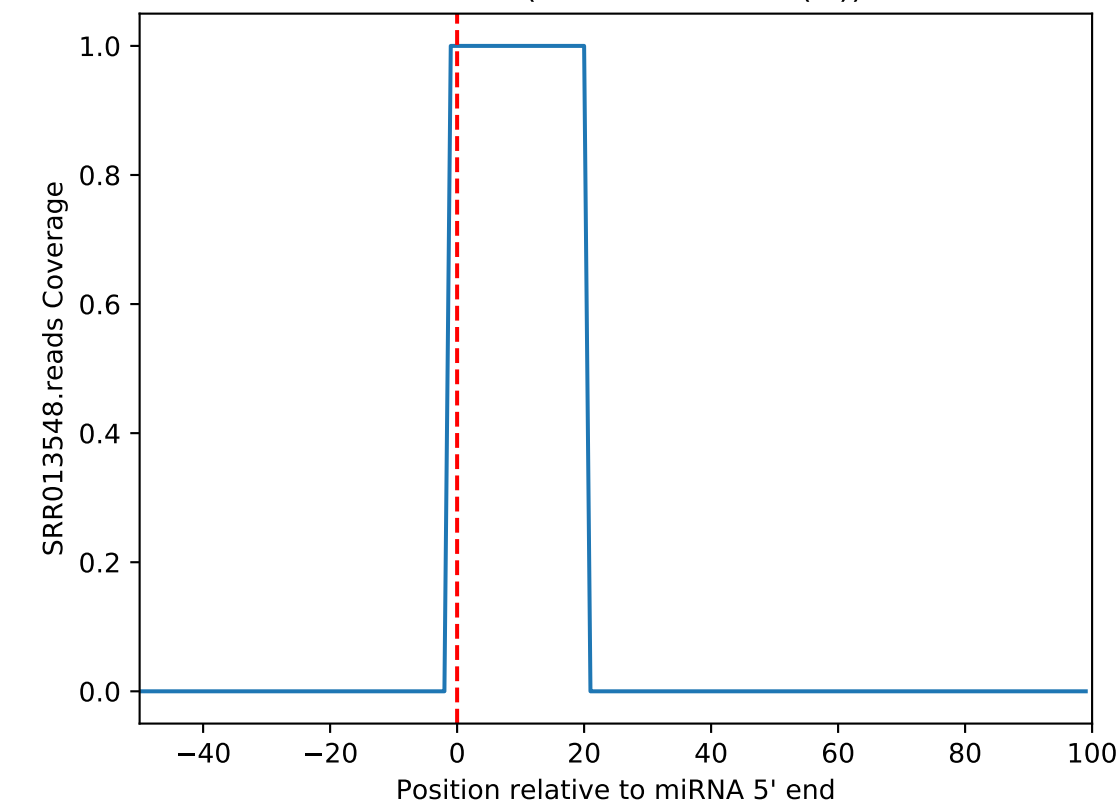

mir-263b (chr3L:15843480(-))

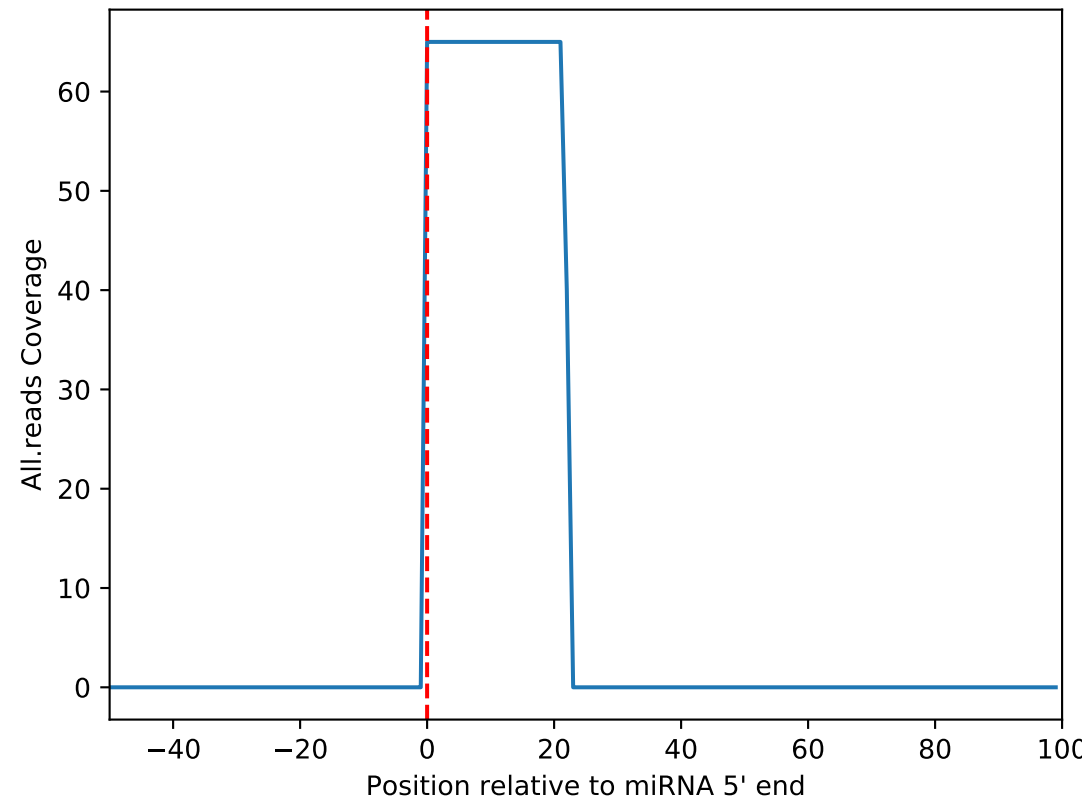

mir-263b (chr3L:15843480(-))

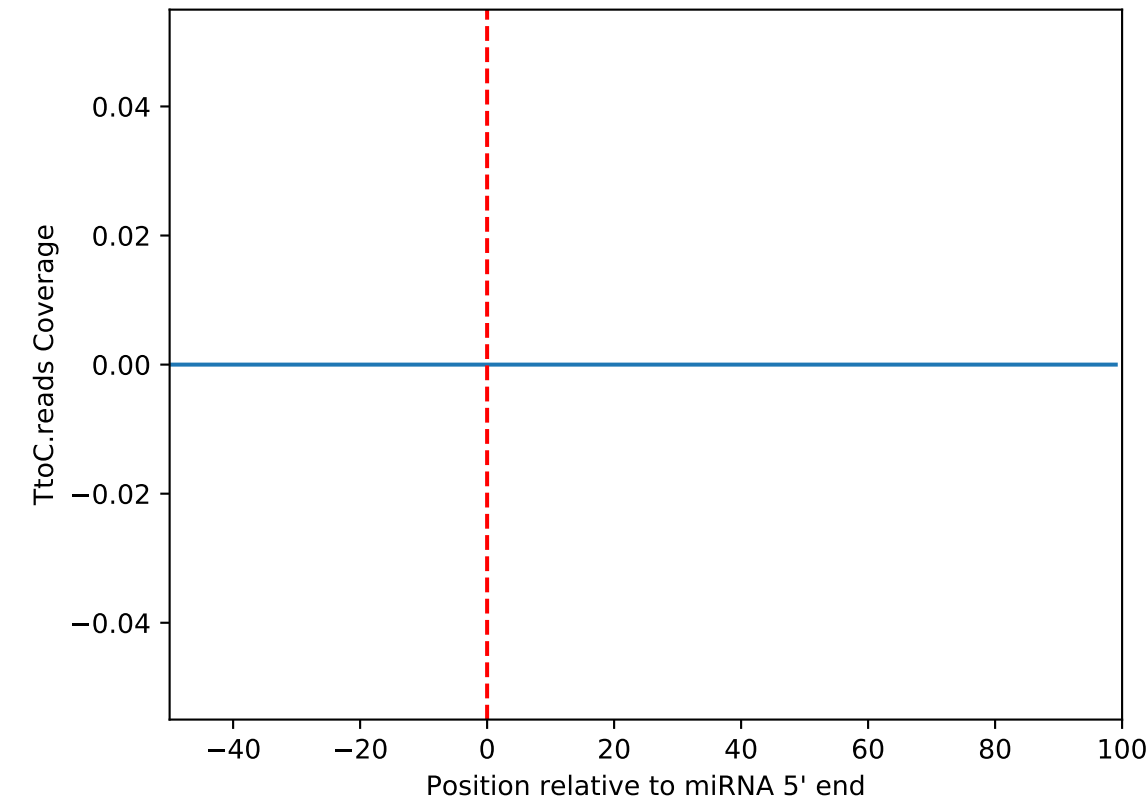

mir-263b (chr3L:15843480(-))

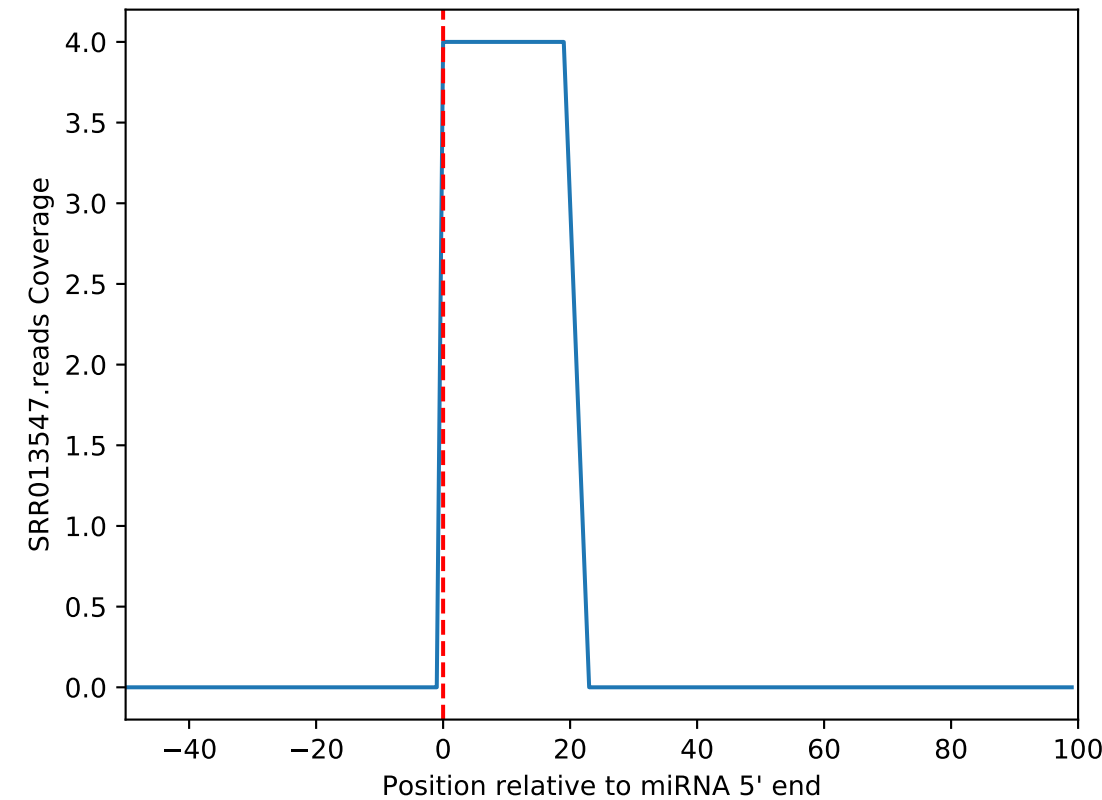

mir-263b (chr3L:15843480(-))

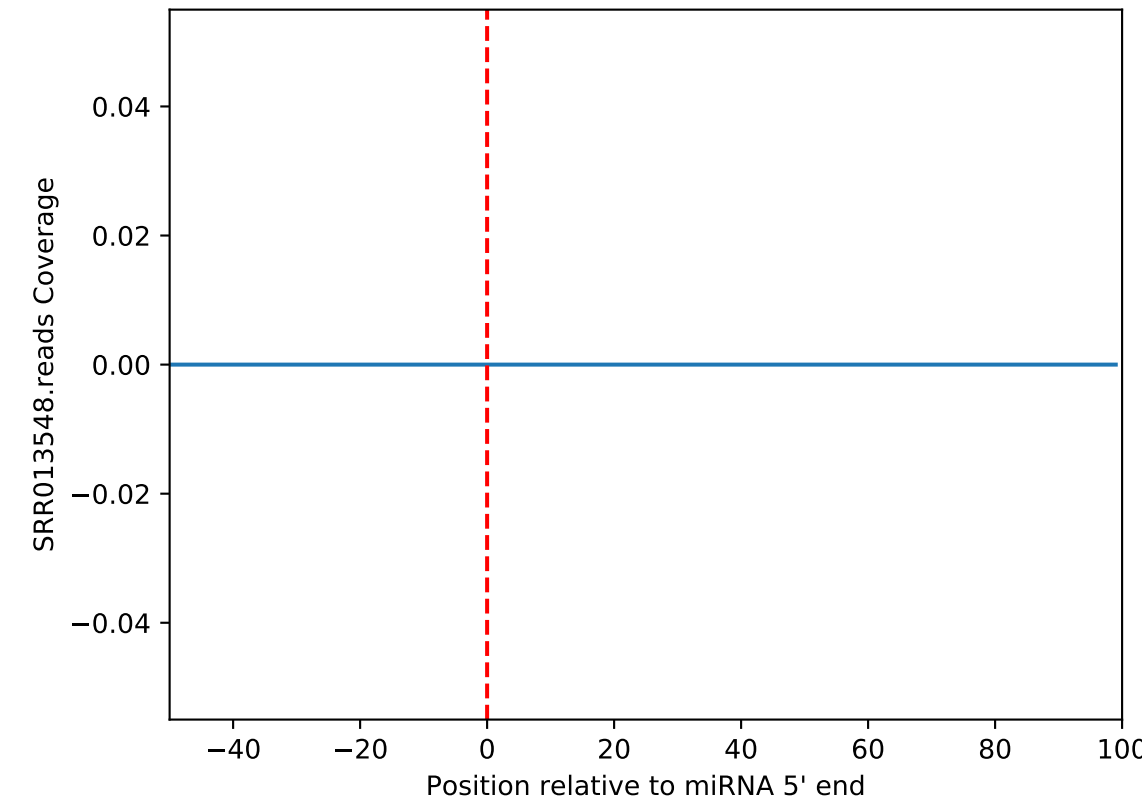

mir-4969 (chr3R:21798651(-))

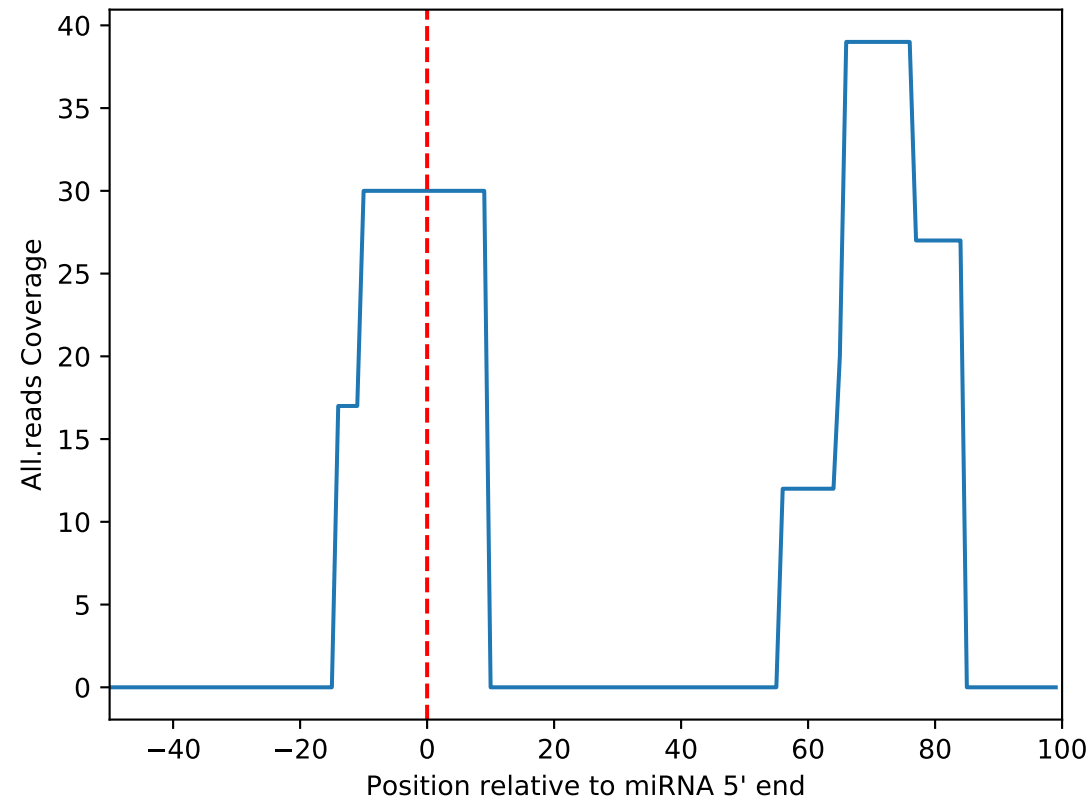

mir-4969 (chr3R:21798651(-))

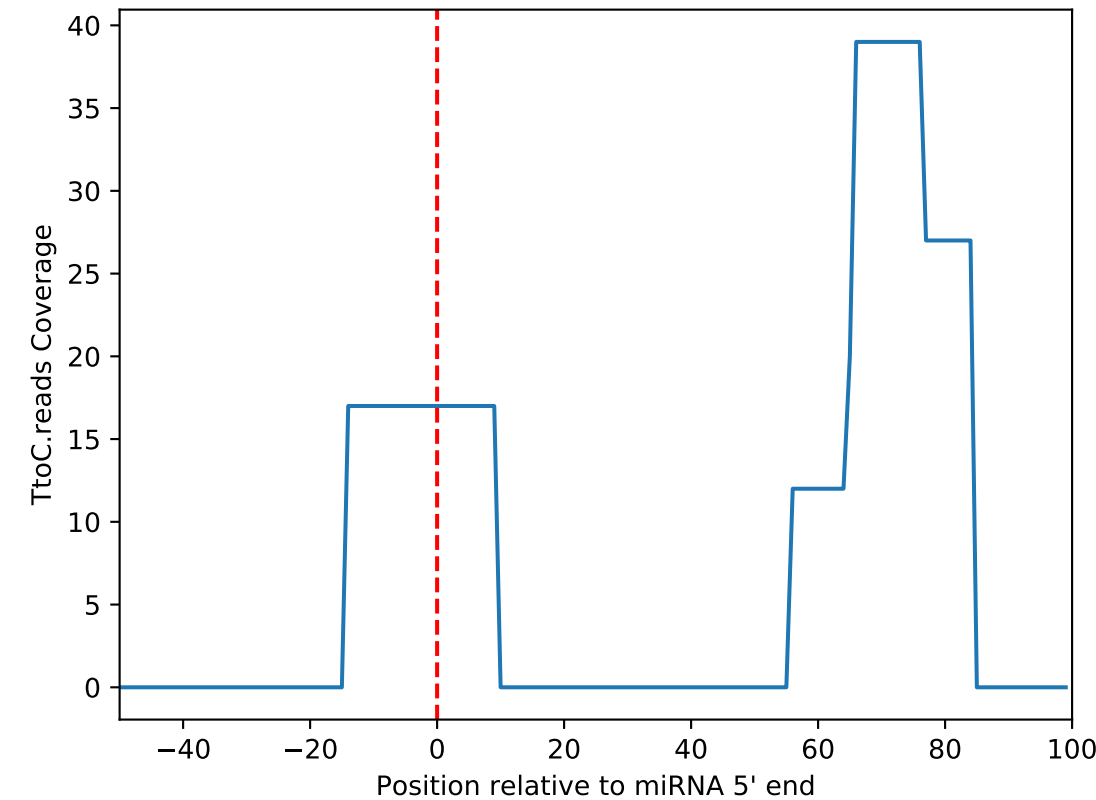

mir-4969 (chr3R:21798651(-))

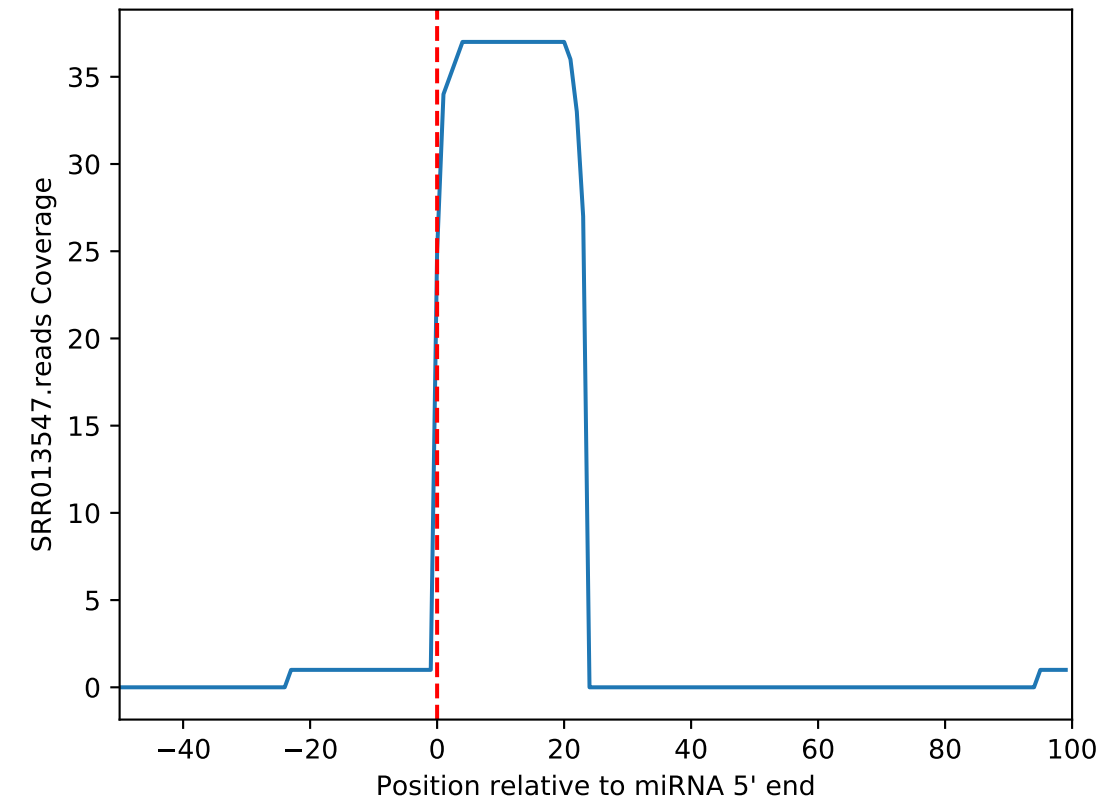

mir-4969 (chr3R:21798651(-))

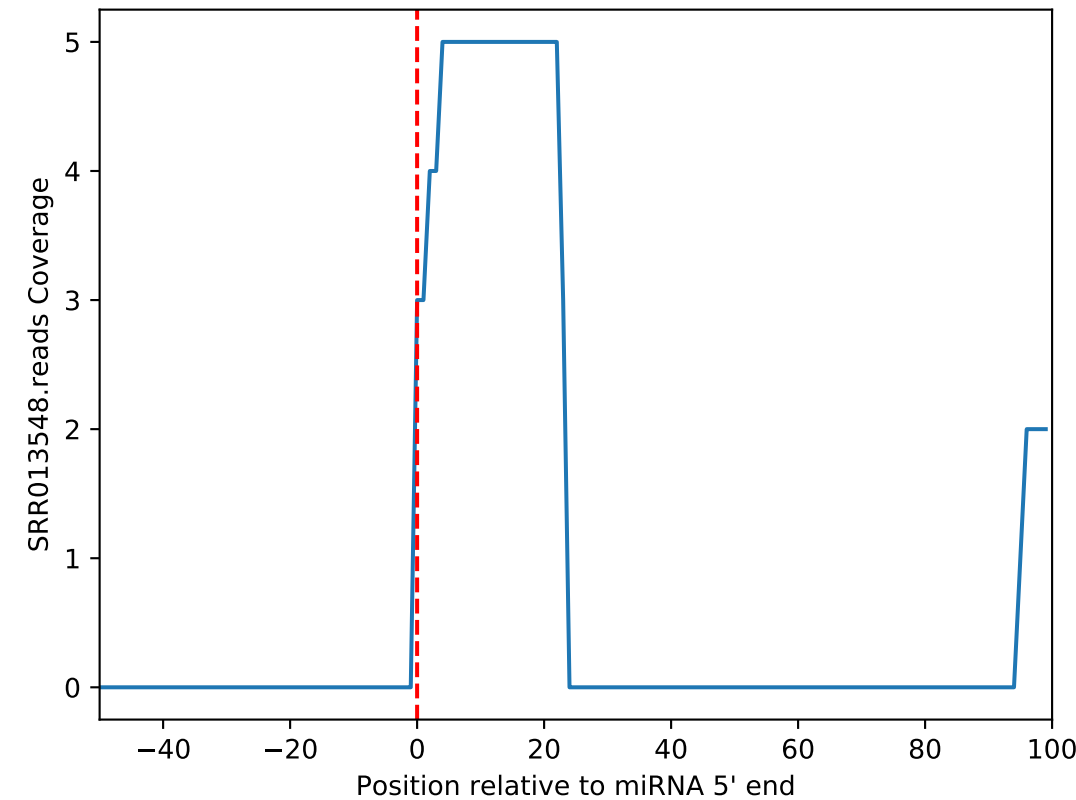

mir-9381 (chr3R:23983496(+))

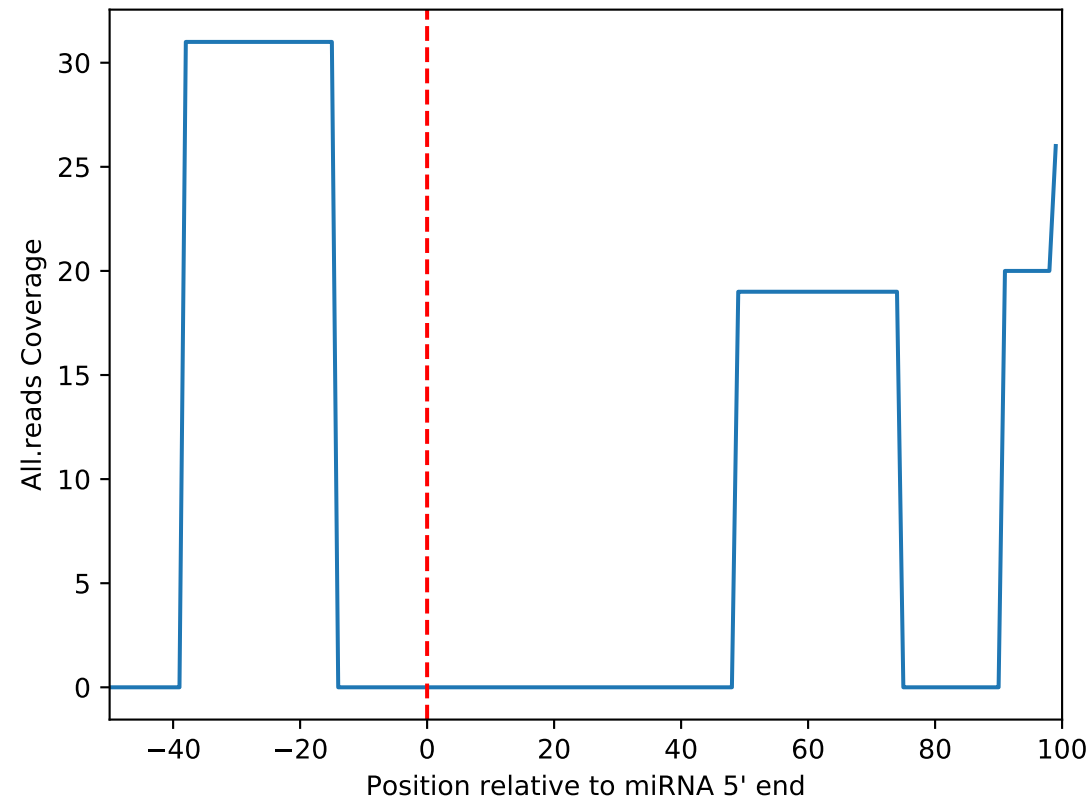

mir-9381 (chr3R:23983496(+))

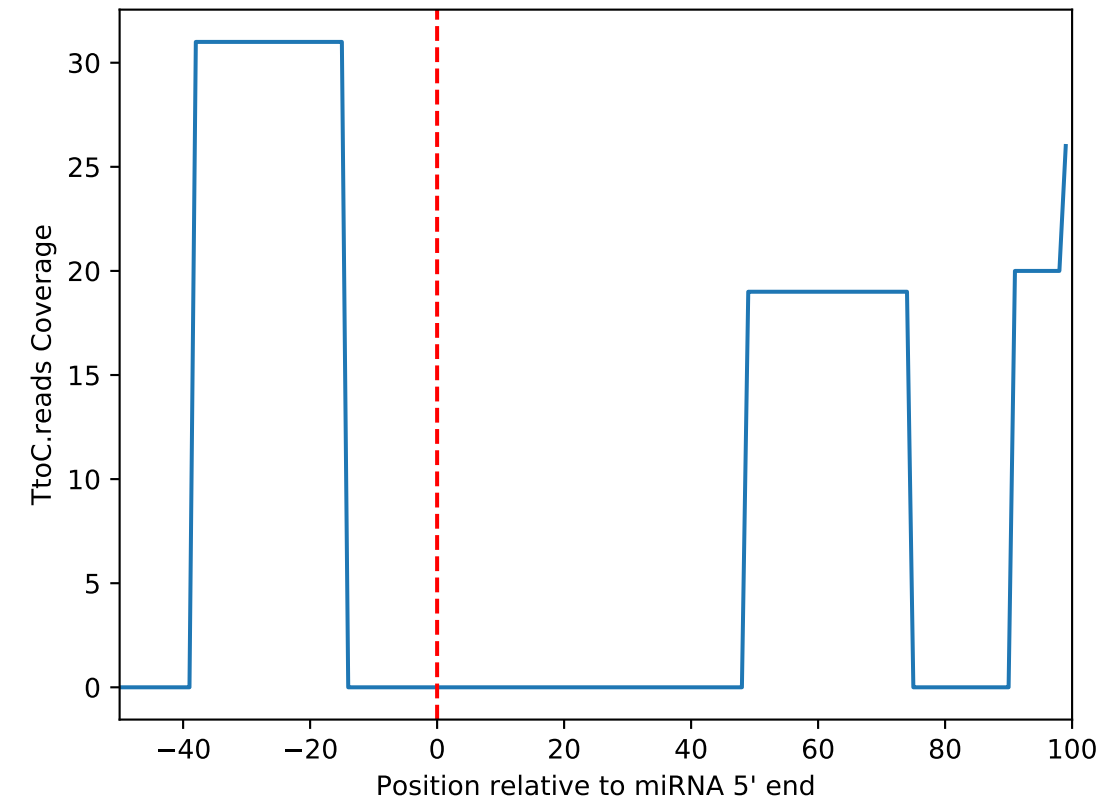

mir-9381 (chr3R:23983496(+))



mir-9381 (chr3R:23983496(+))

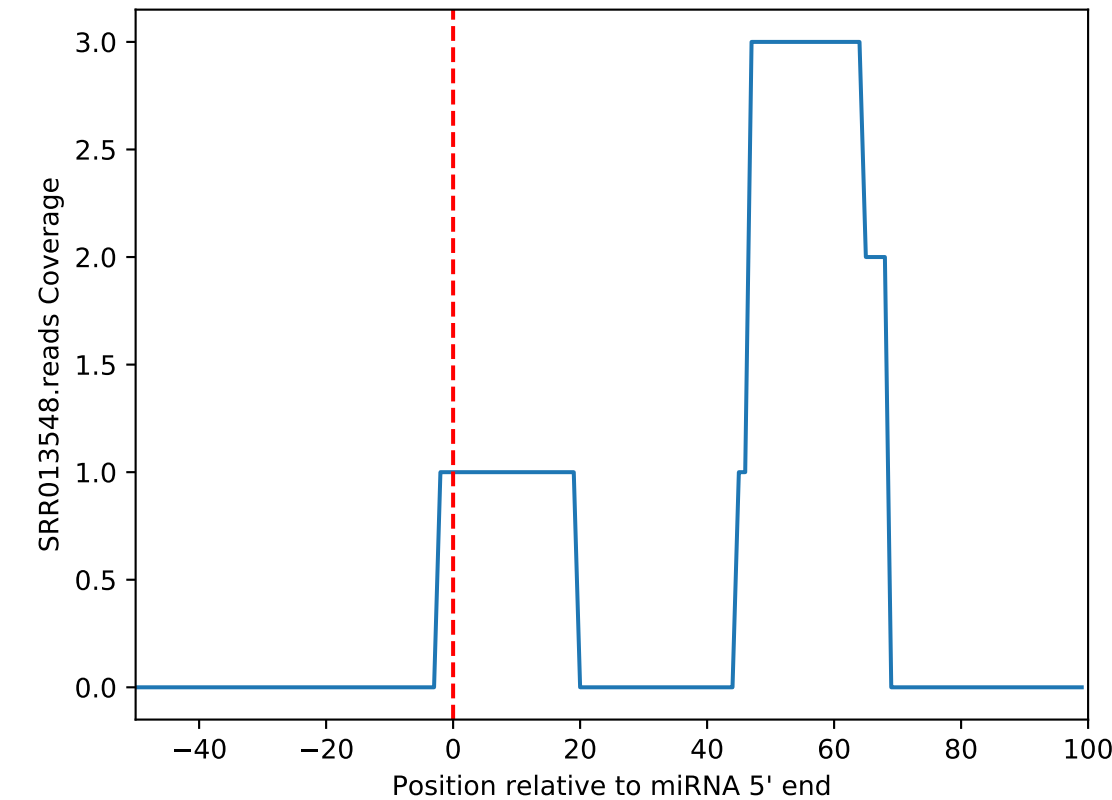

mir-975 (chrX:19558768(+))

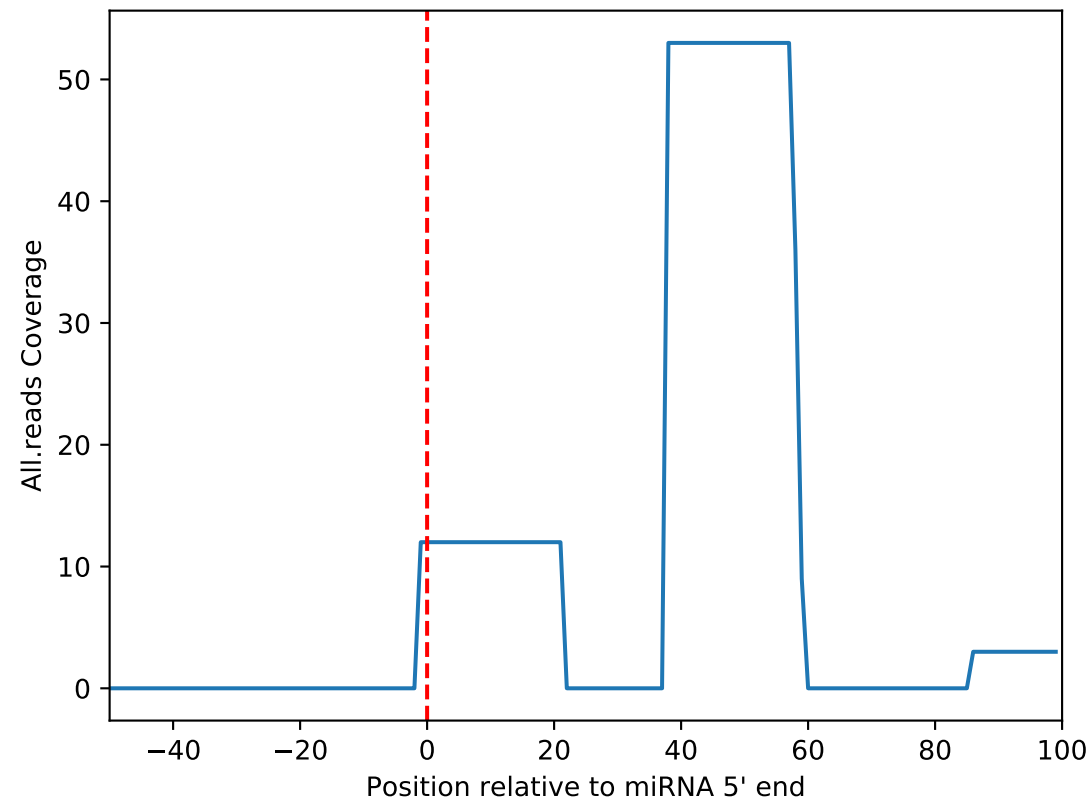

mir-975 (chrX:19558768(+))



mir-975 (chrX:19558768(+))

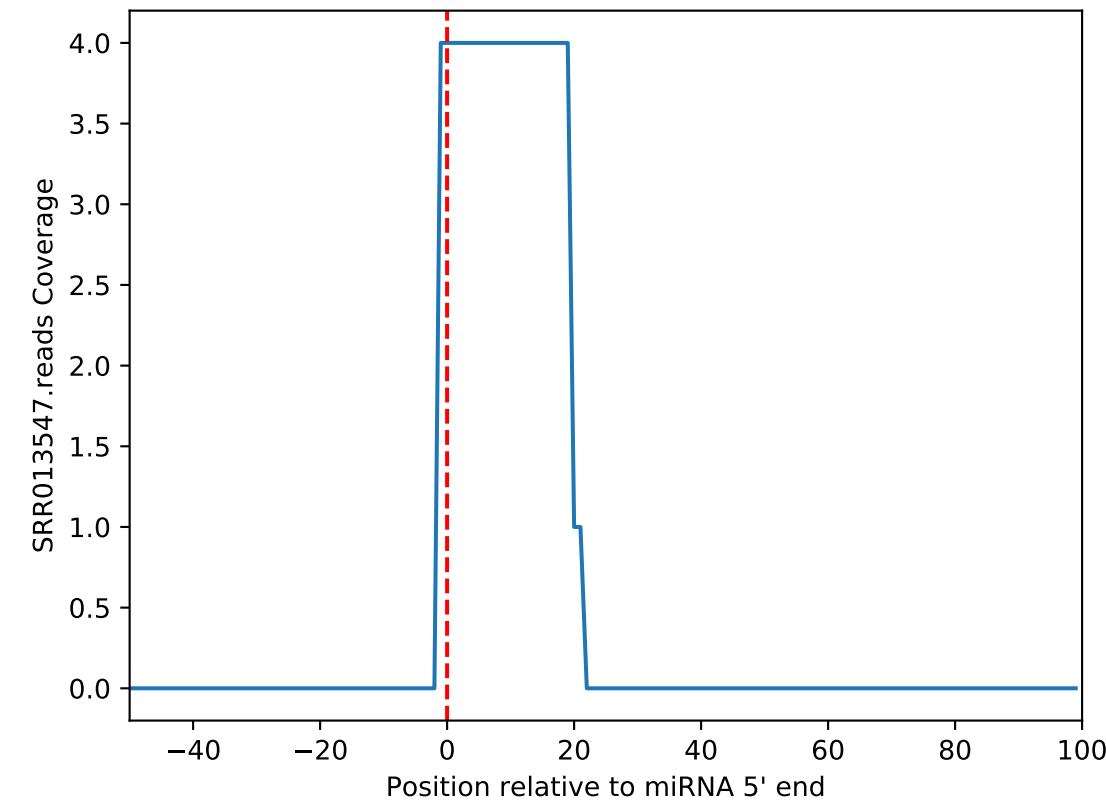

mir-975 (chrX:19558768(+))



mir-932 (chr2L:6902077(+))

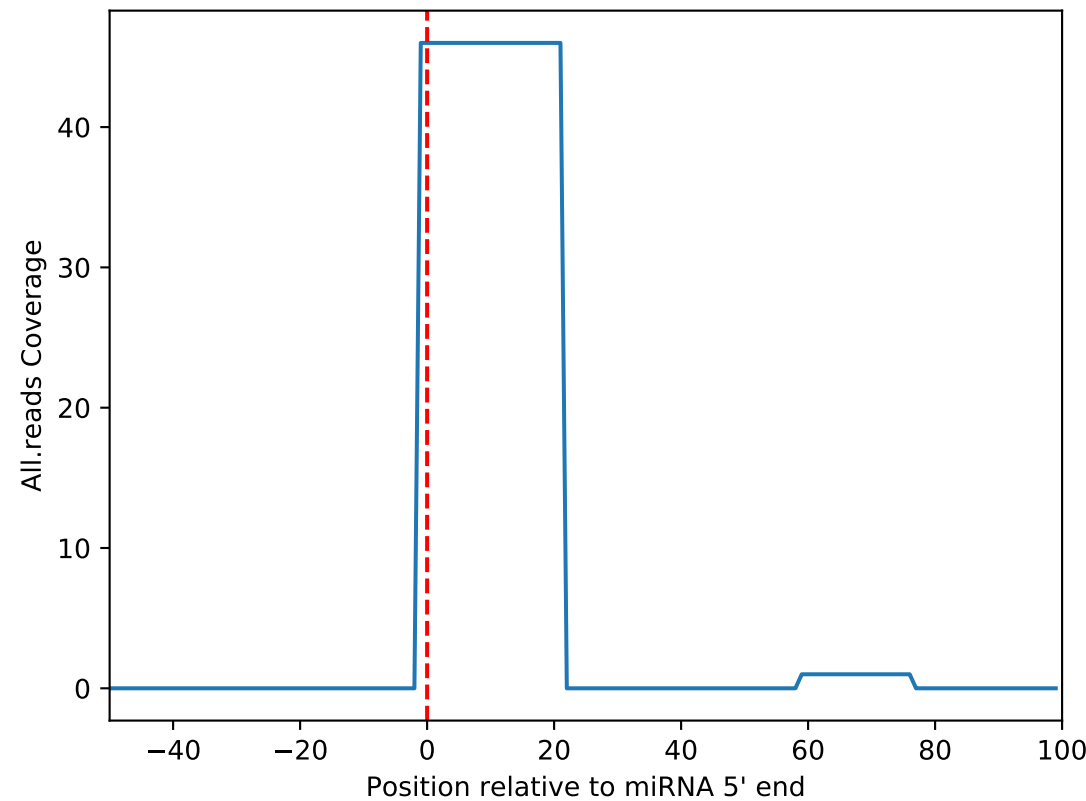

mir-932 (chr2L:6902077(+))



mir-932 (chr2L:6902077(+))

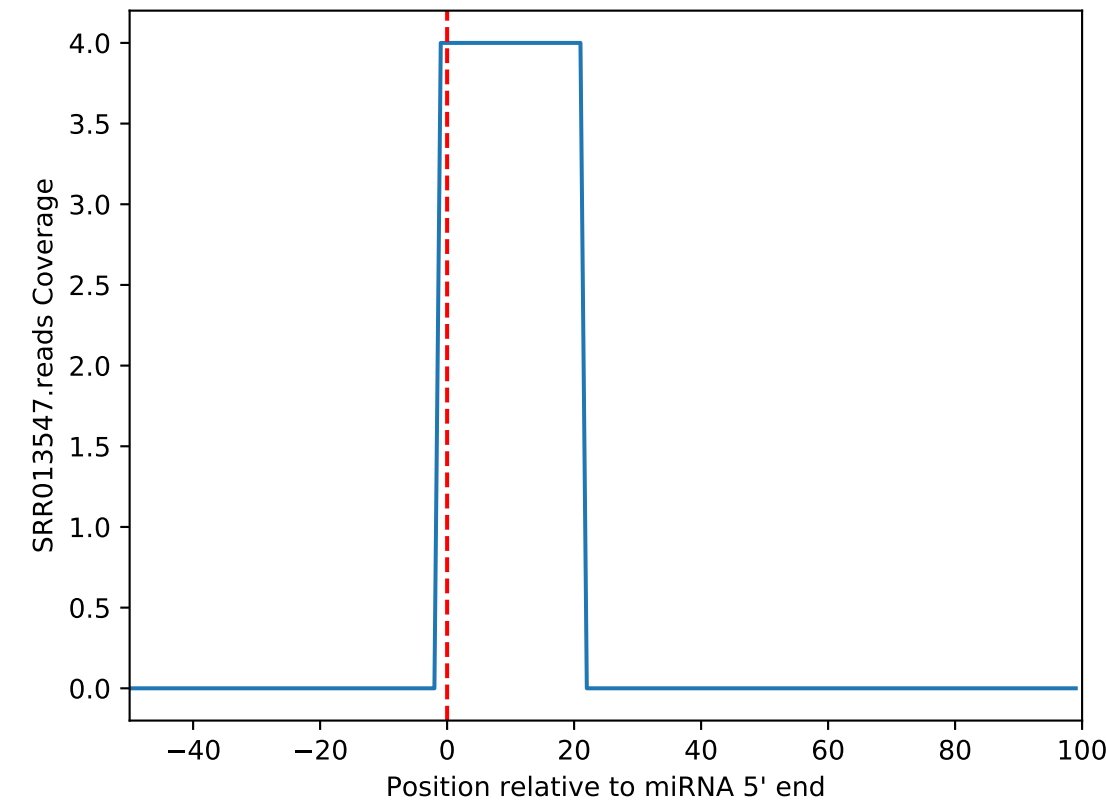

mir-932 (chr2L:6902077(+))

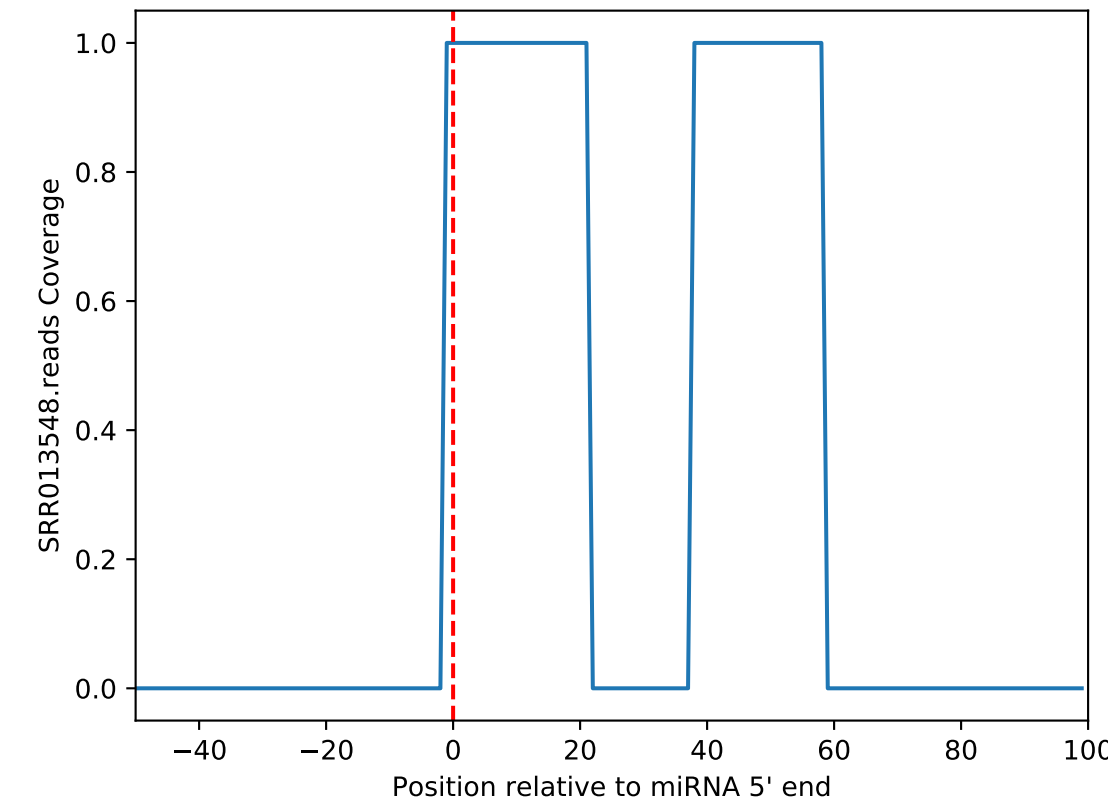

mir-2500 (chr3L:16998524(-))

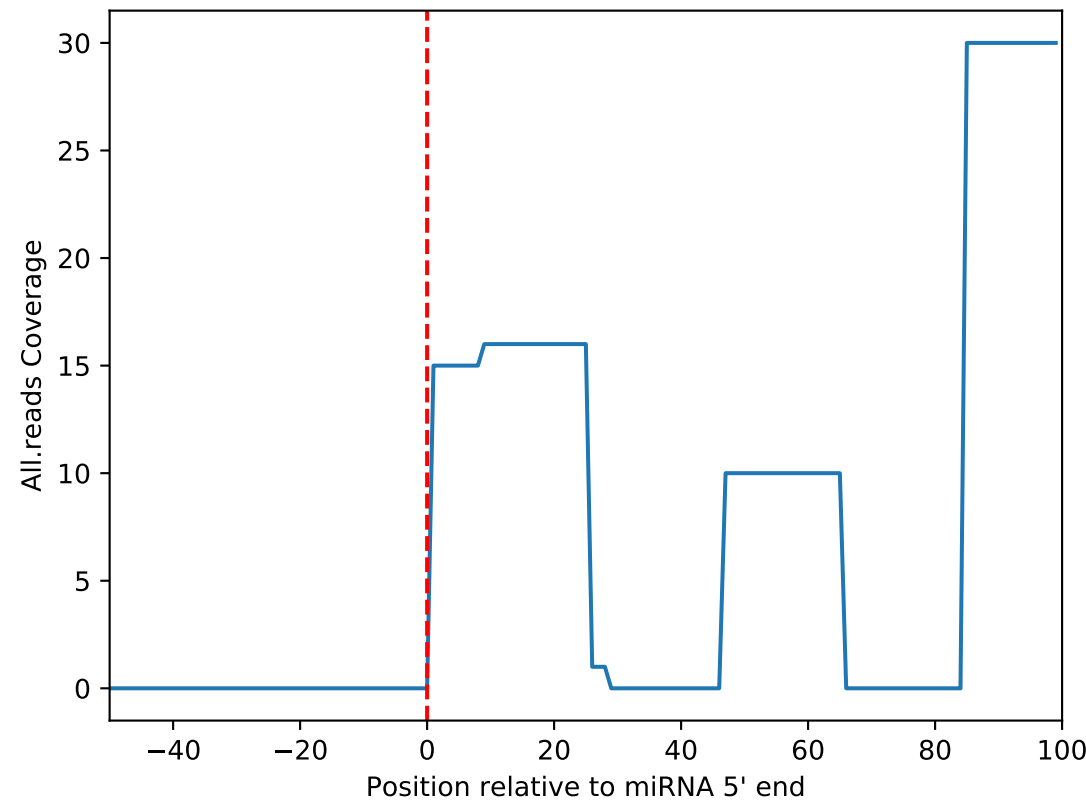

mir-2500 (chr3L:16998524(-))

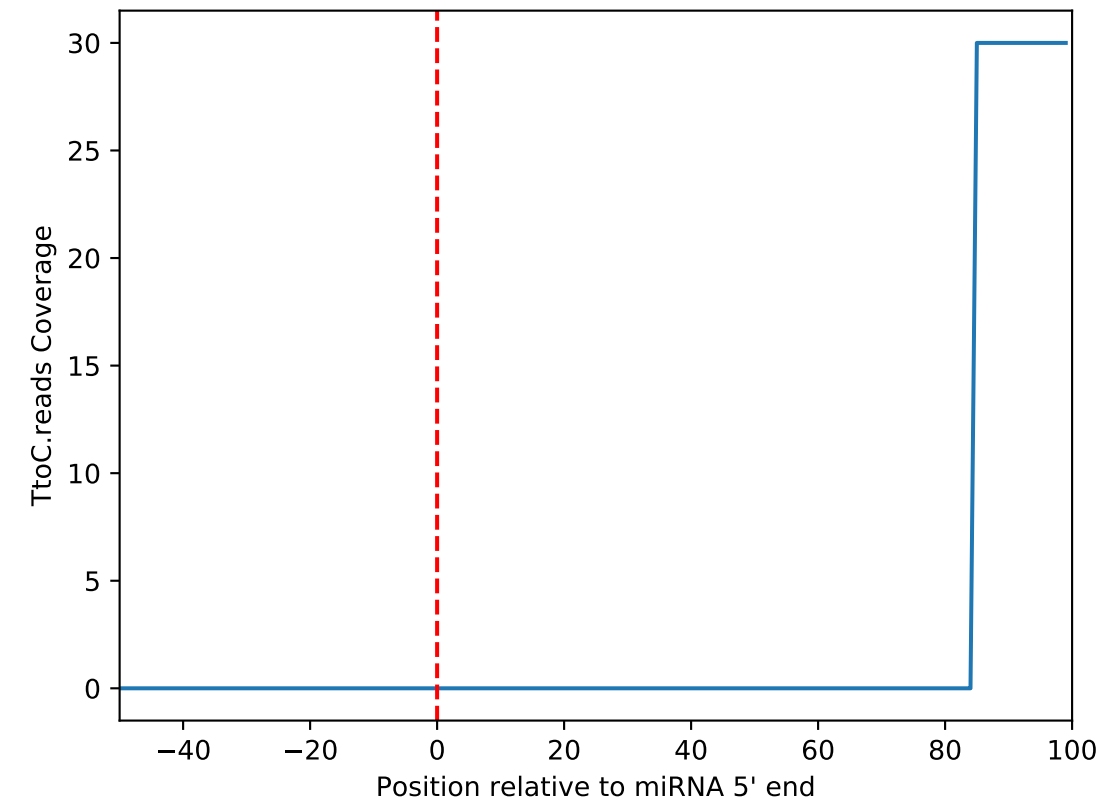

mir-2500 (chr3L:16998524(-))

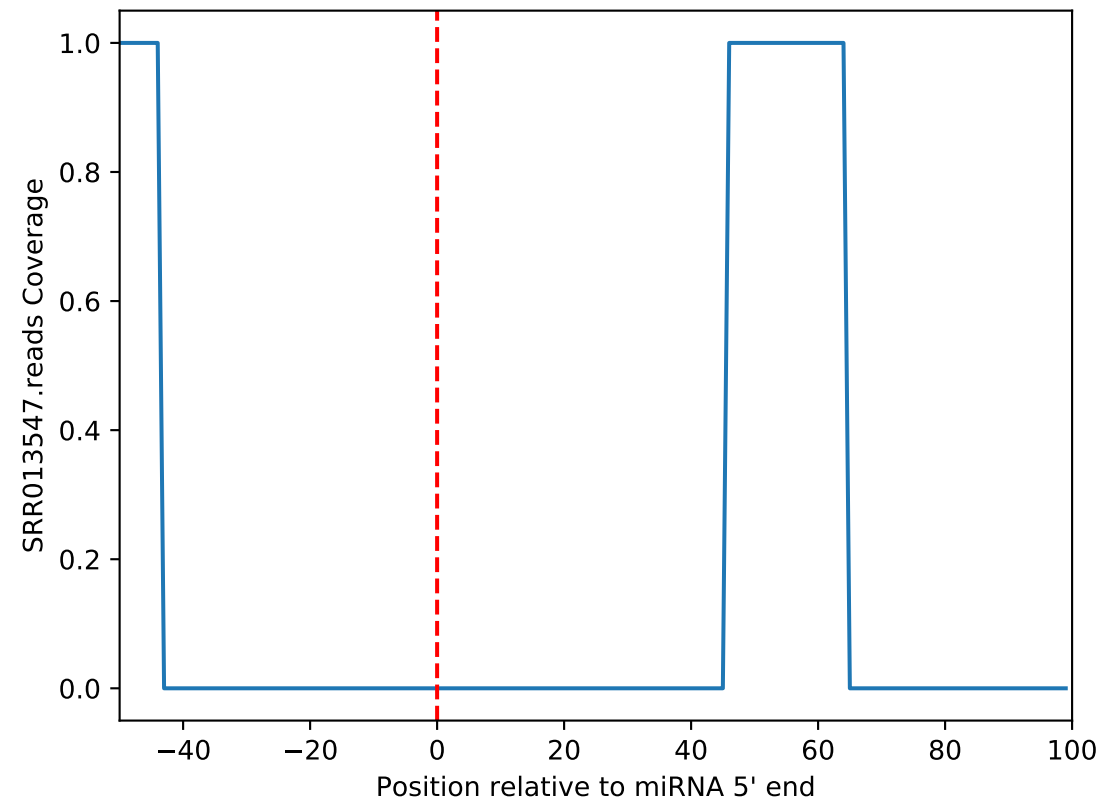

mir-2500 (chr3L:16998524(-))

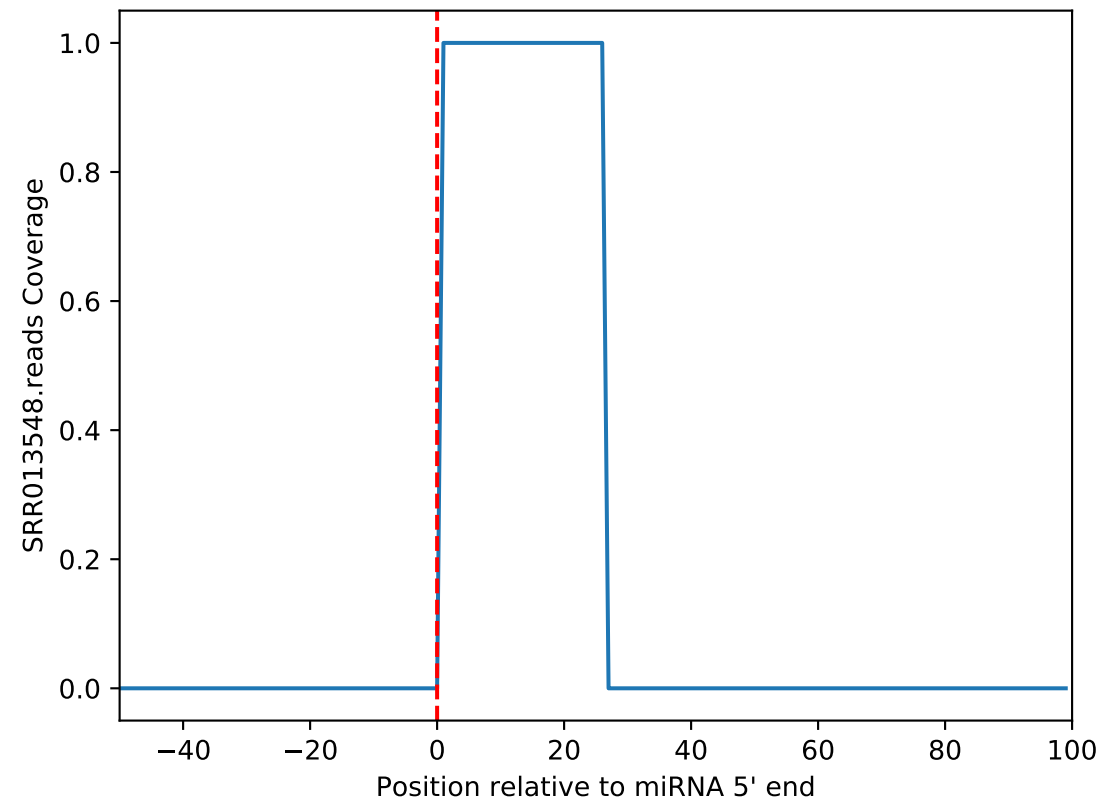



mir-4968 (chr3L:11552645(-))

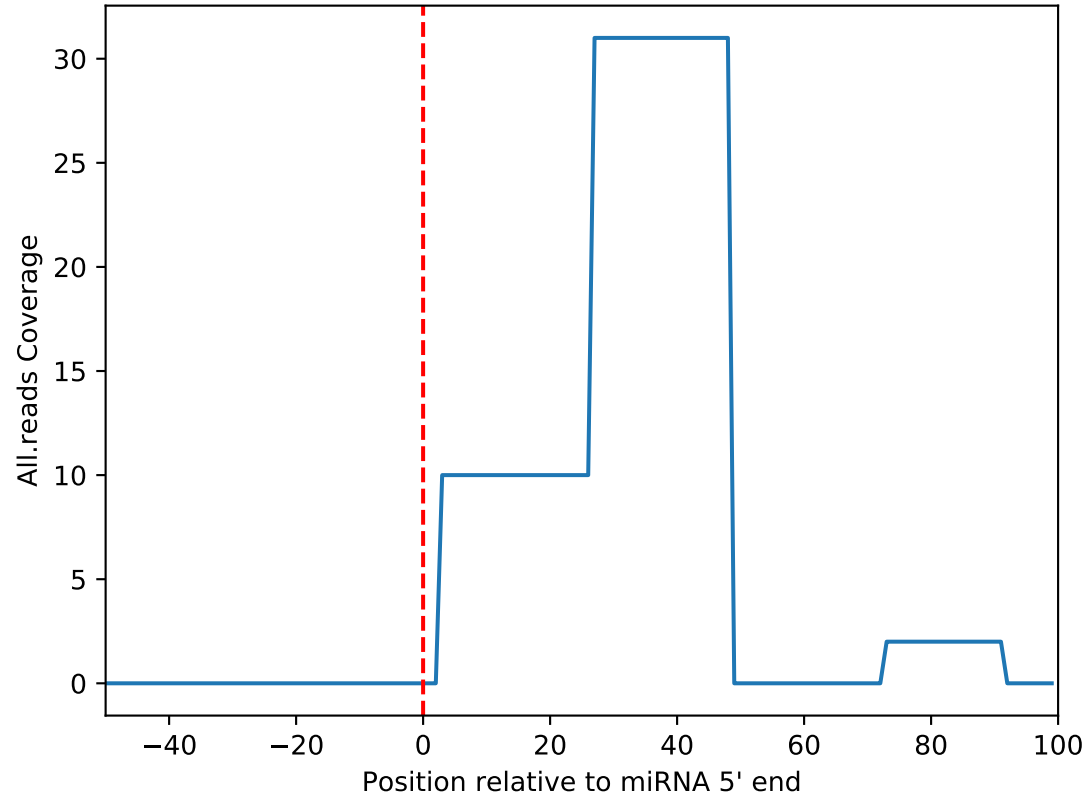

mir-4968 (chr3L:11552645(-))

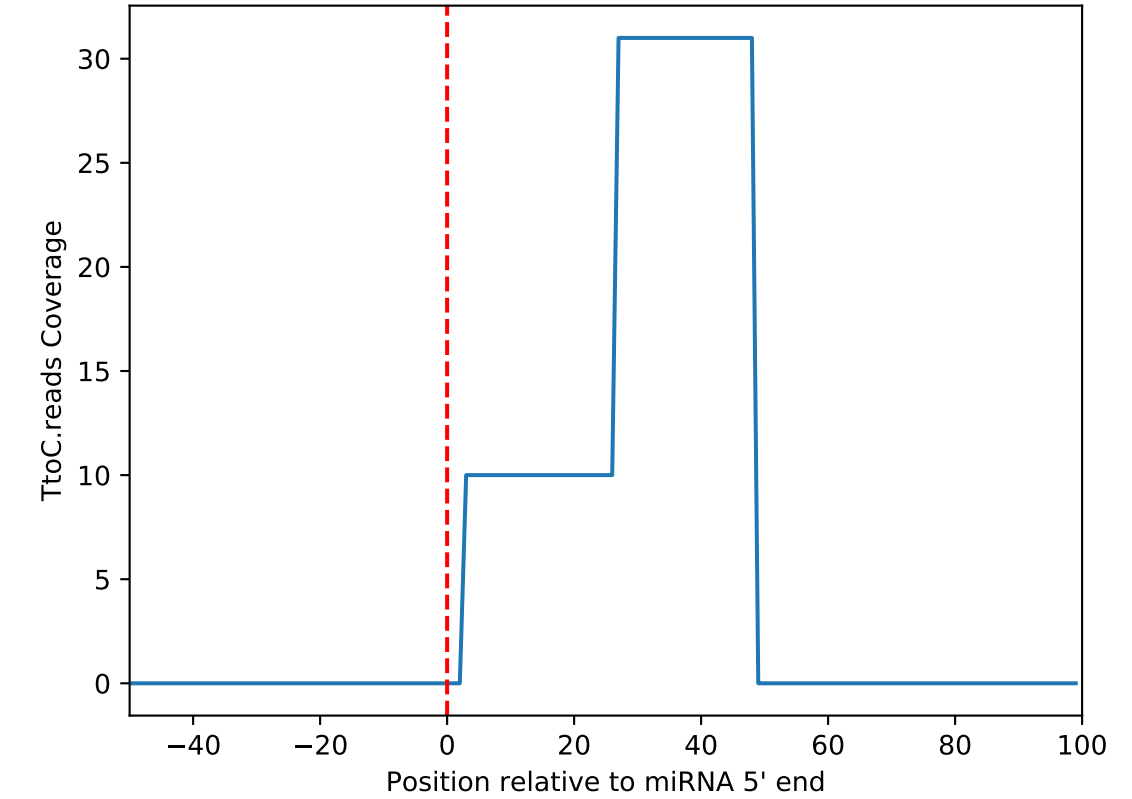

mir-4968 (chr3L:11552645(-))

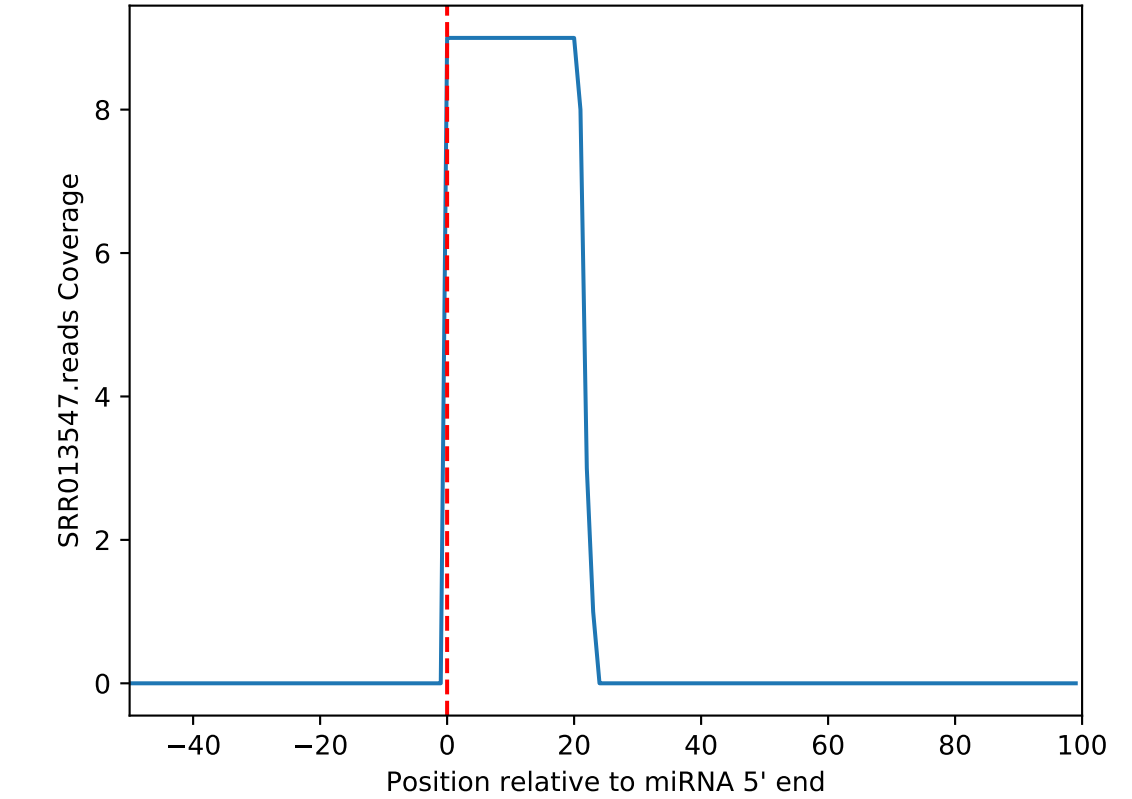

mir-4968 (chr3L:11552645(-))

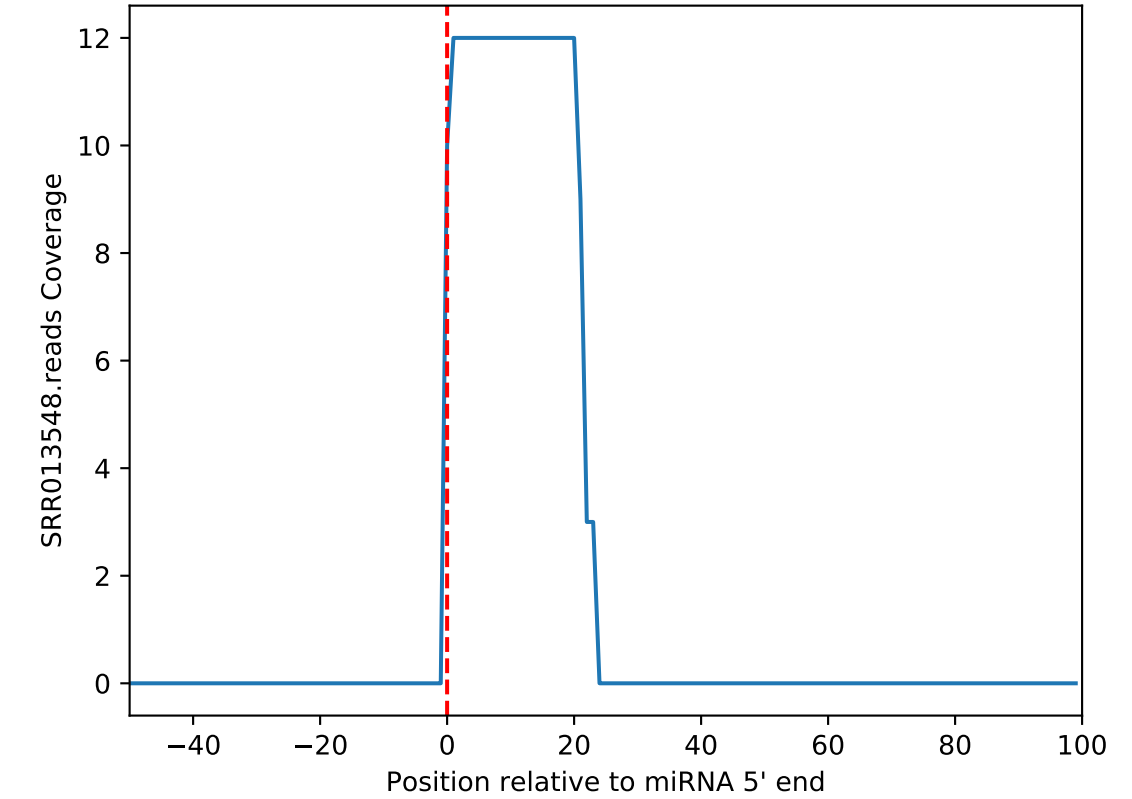

mir-13a (chr3R:15417609(-))

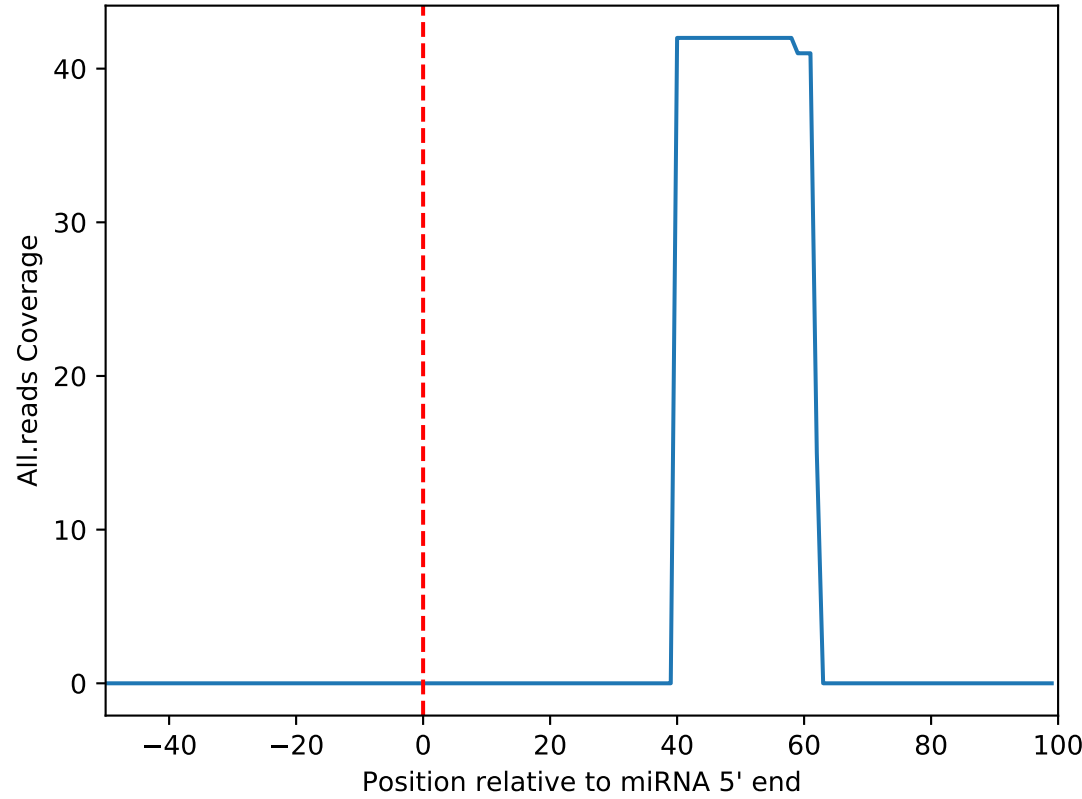

mir-13a (chr3R:15417609(-))

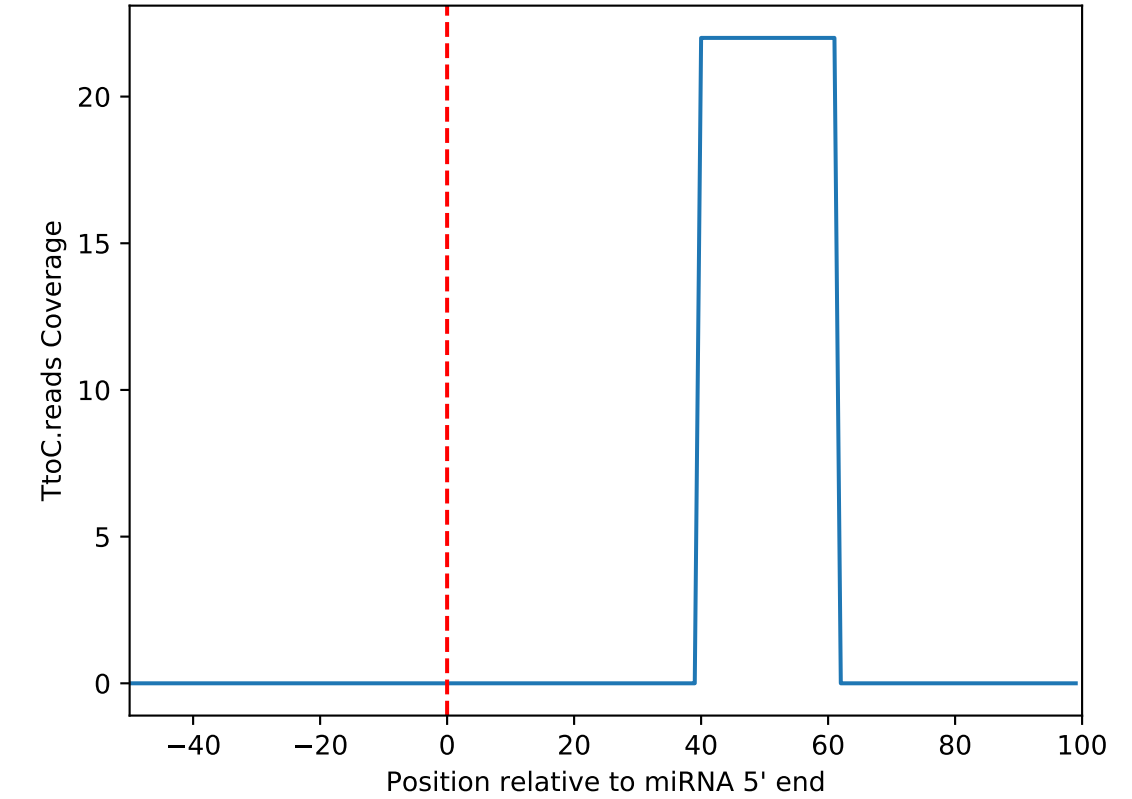

mir-13a (chr3R:15417609(-))

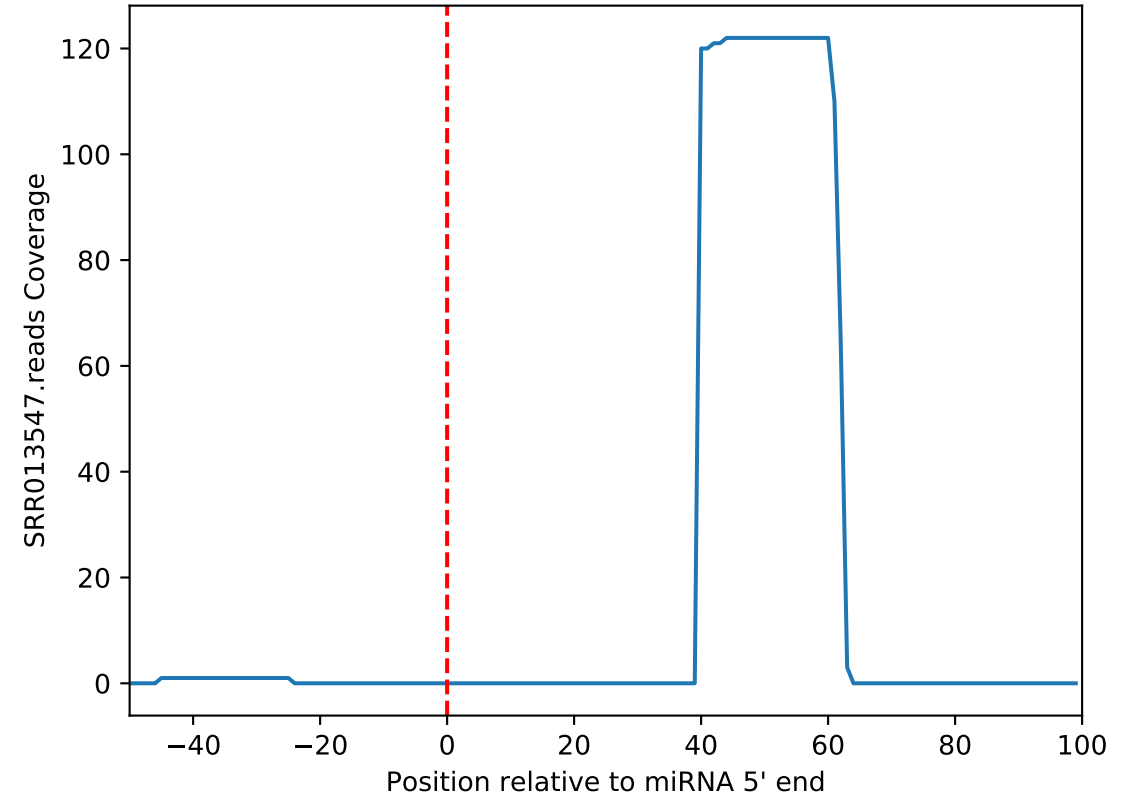

mir-13a (chr3R:15417609(-))

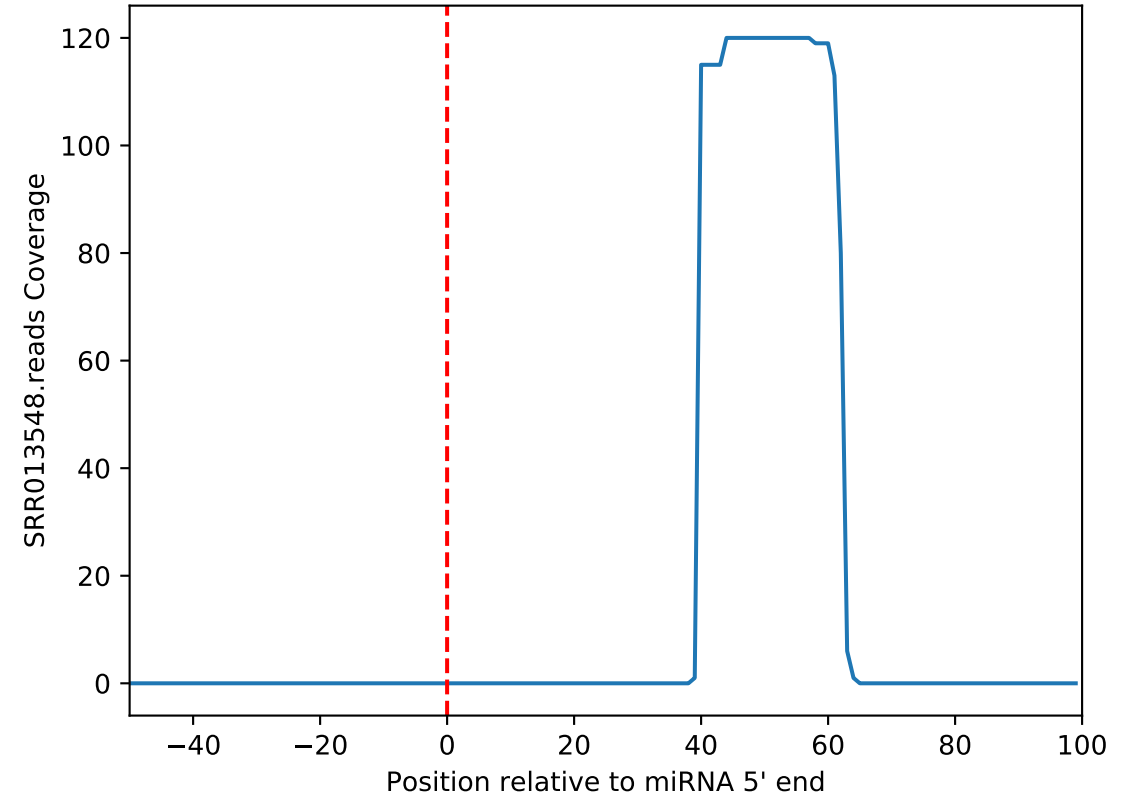

mir-4954 (chrX:2029078(-))

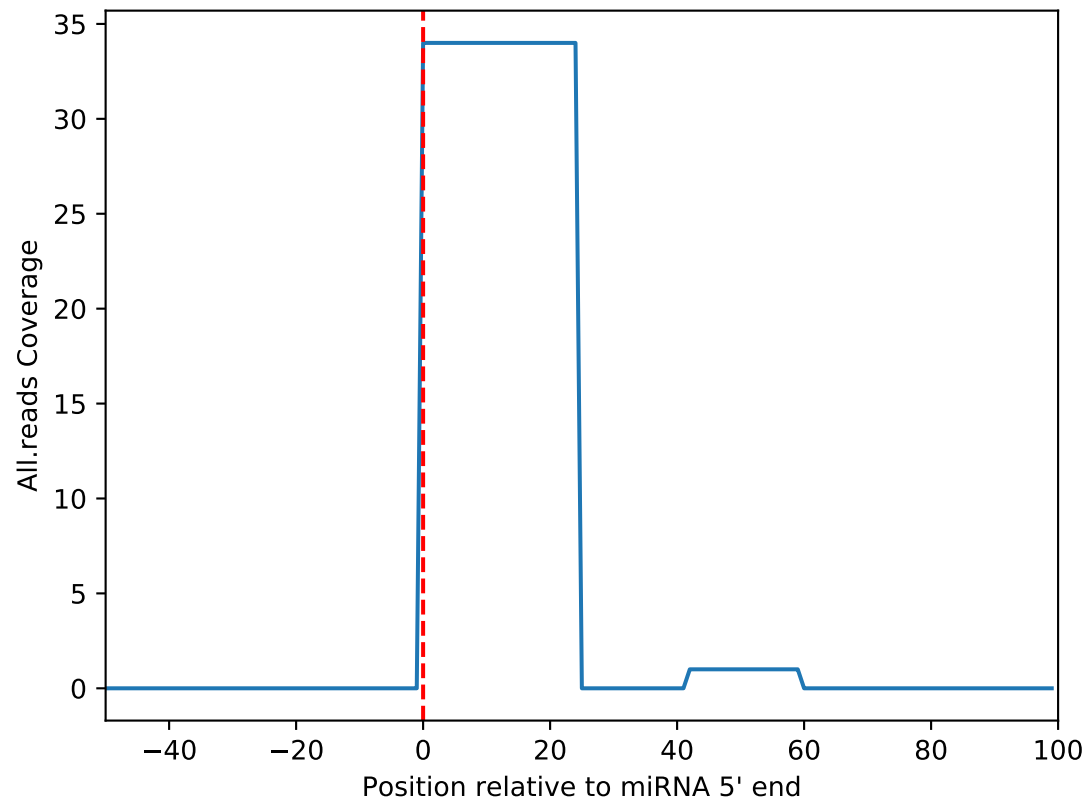

mir-4954 (chrX:2029078(-))

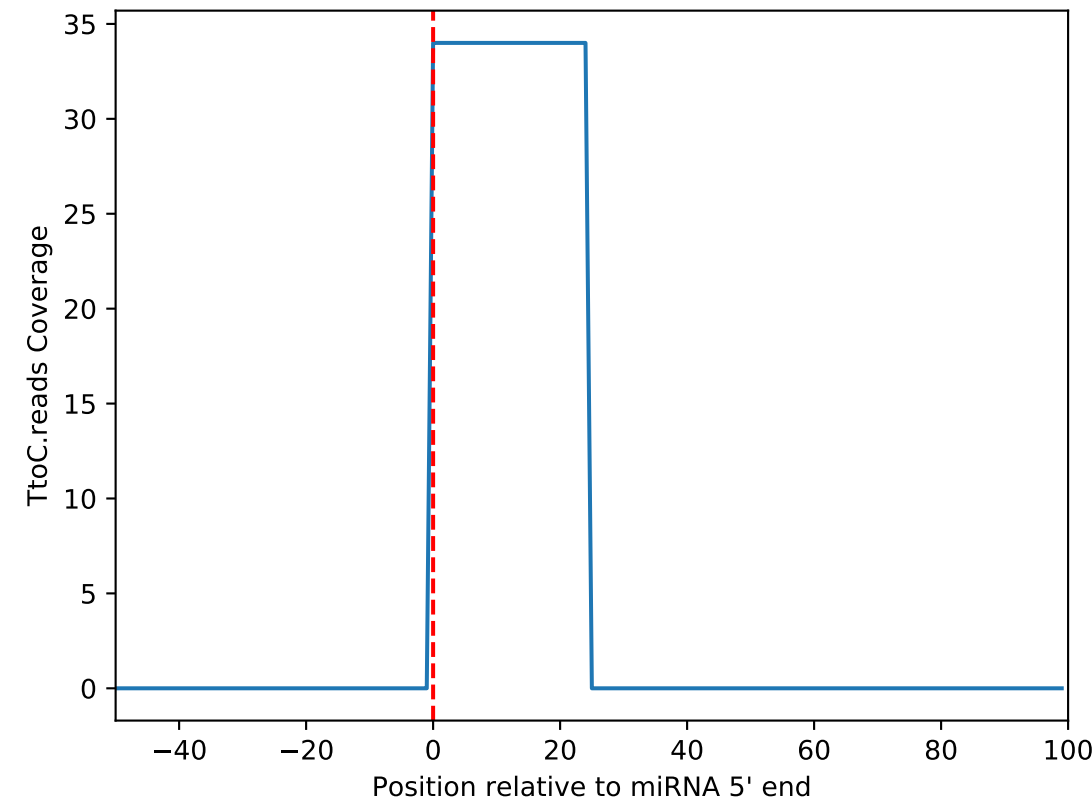

mir-4954 (chrX:2029078(-))

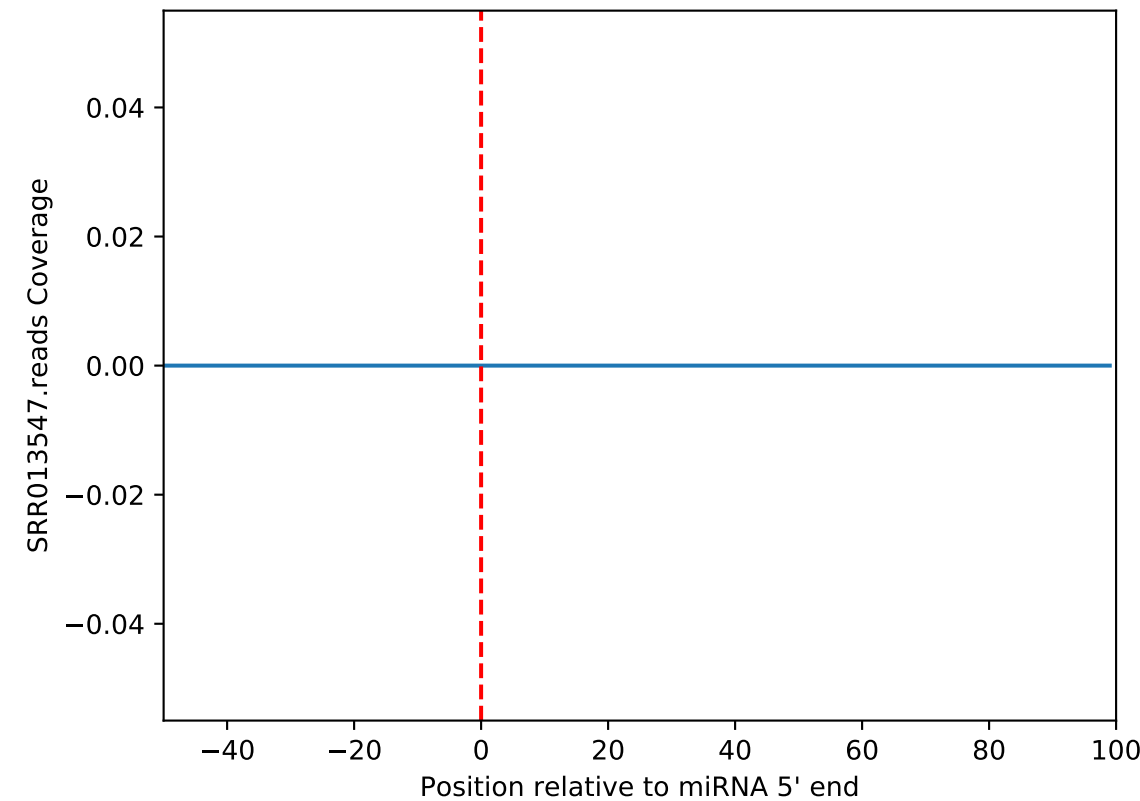

mir-4954 (chrX:2029078(-))

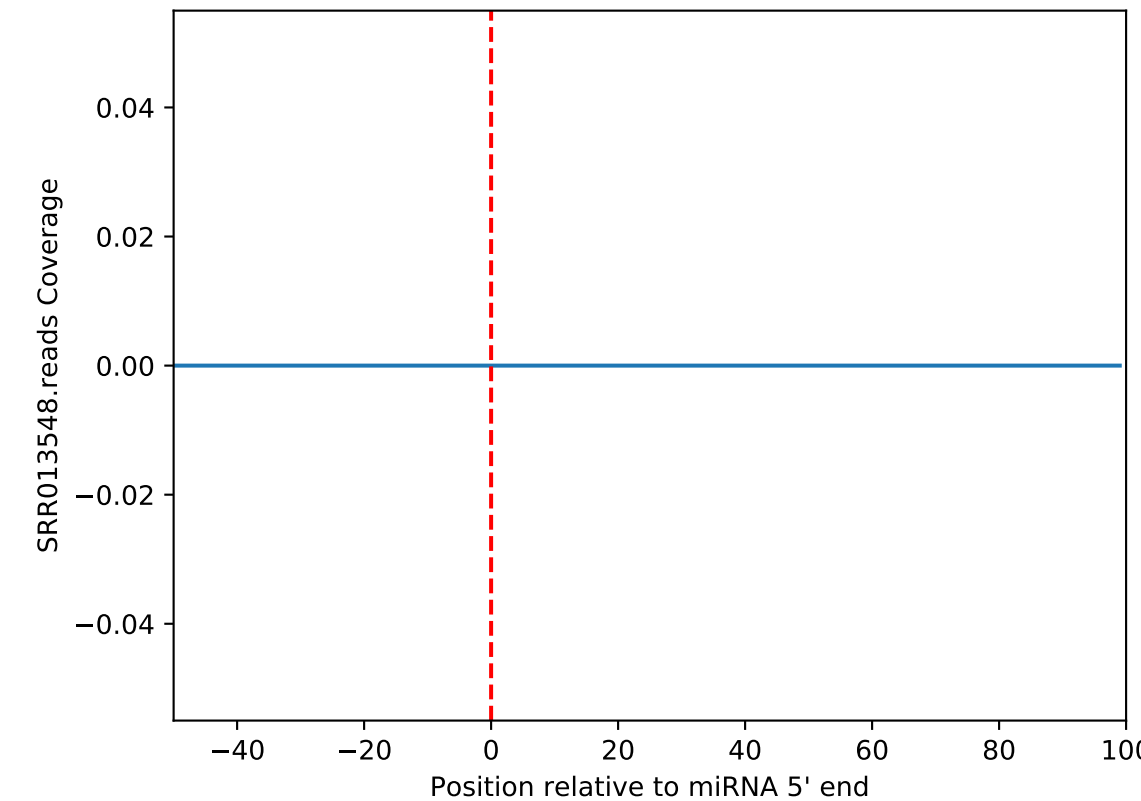

mir-2489 (chr2L:13609978(+))

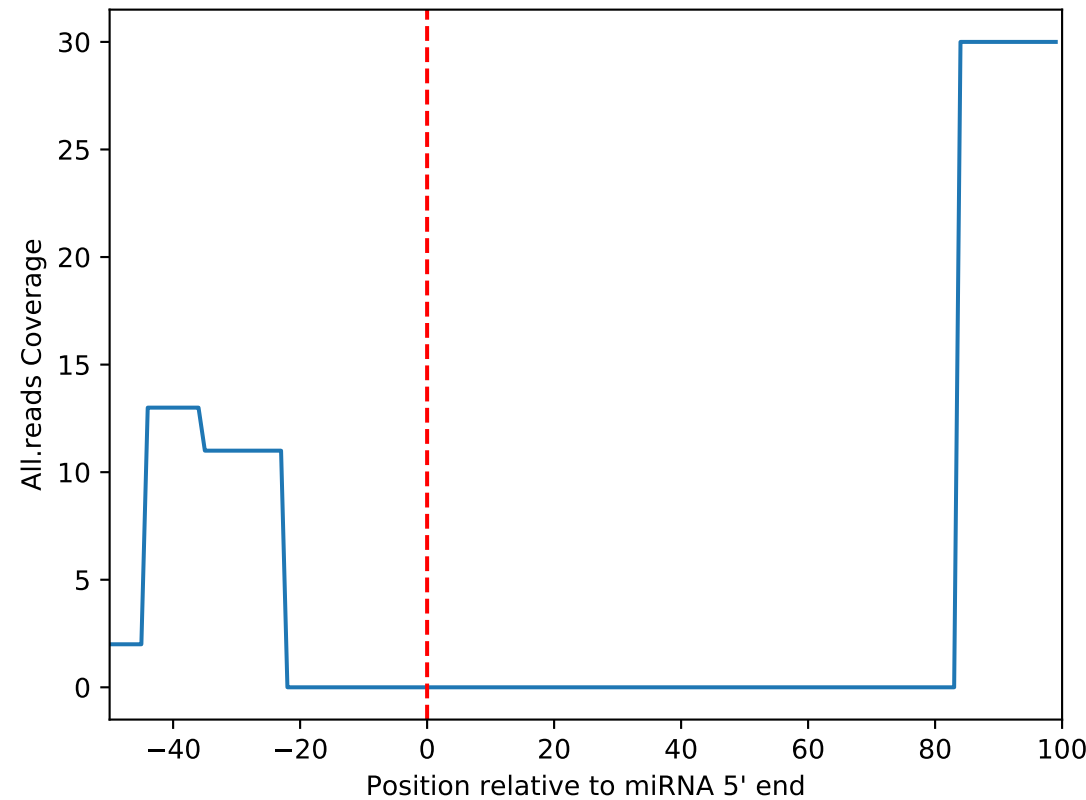

mir-2489 (chr2L:13609978(+))

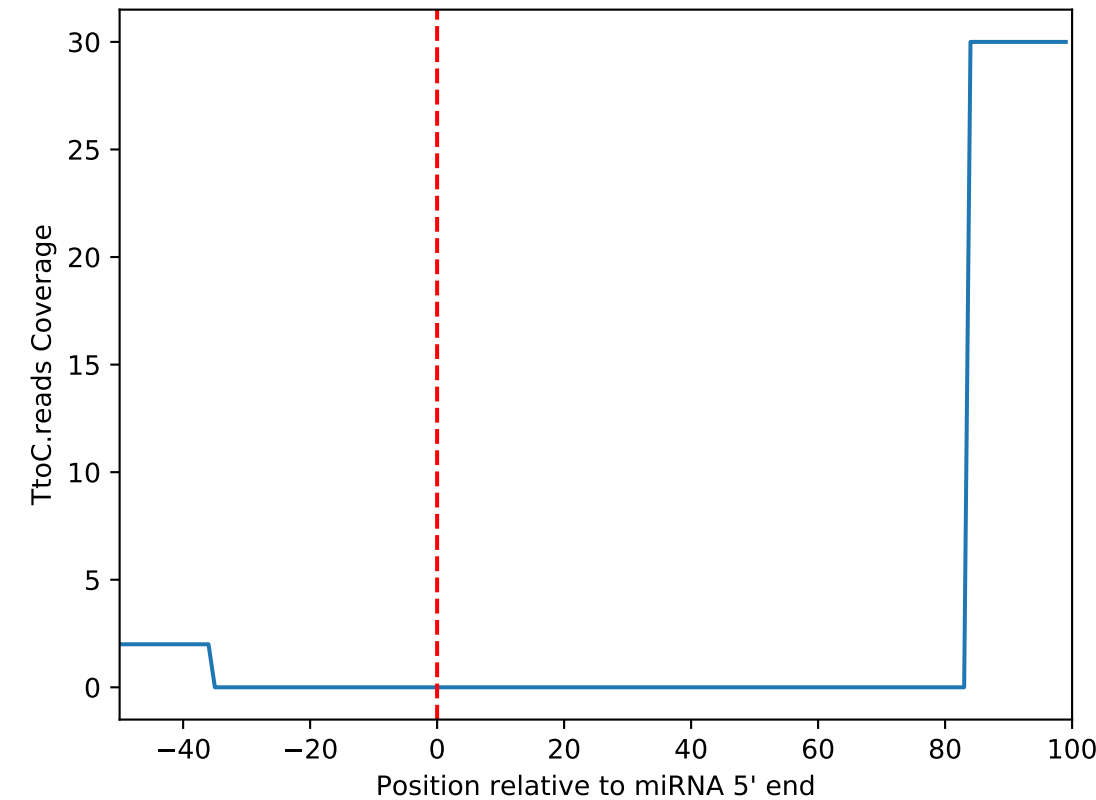

mir-2489 (chr2L:13609978(+))

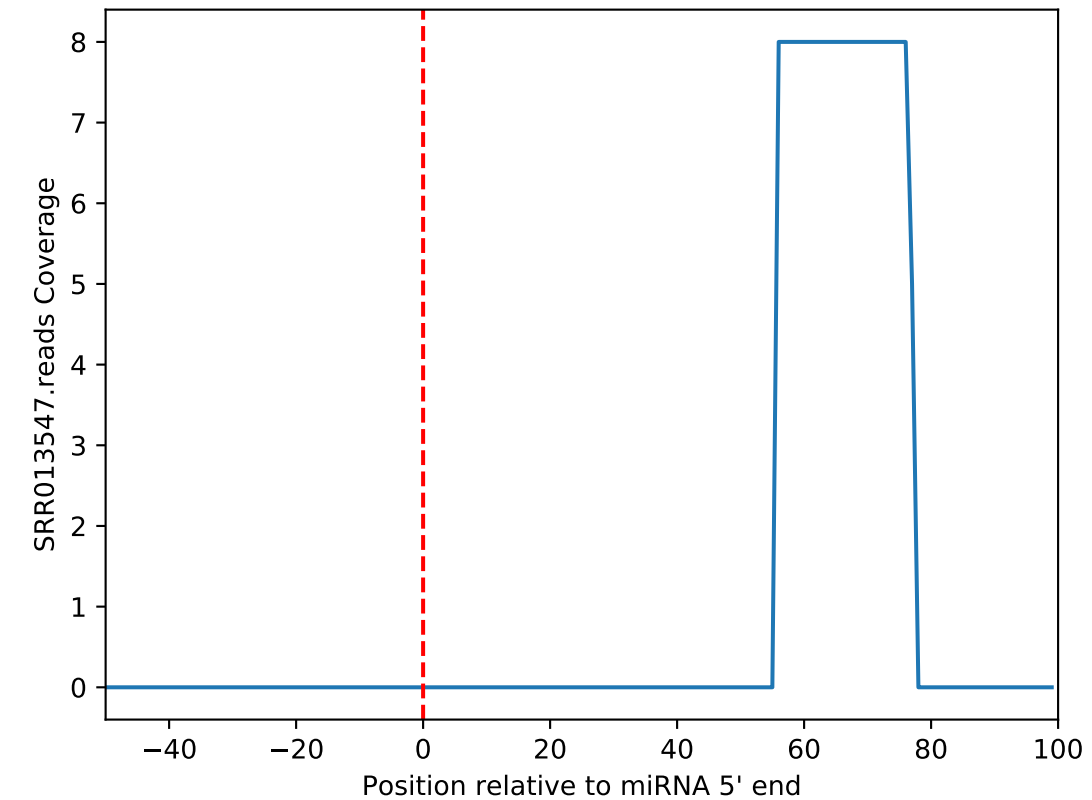

mir-2489 (chr2L:13609978(+))

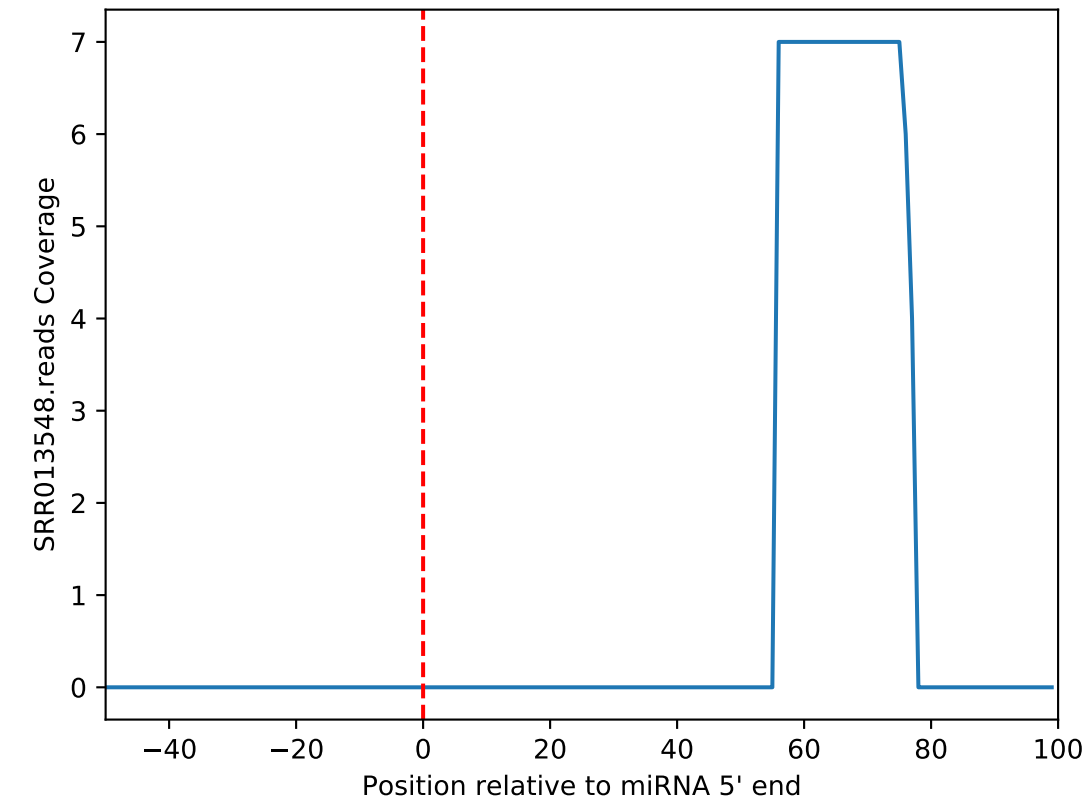

mir-3643 (chr2R:17766460(-))

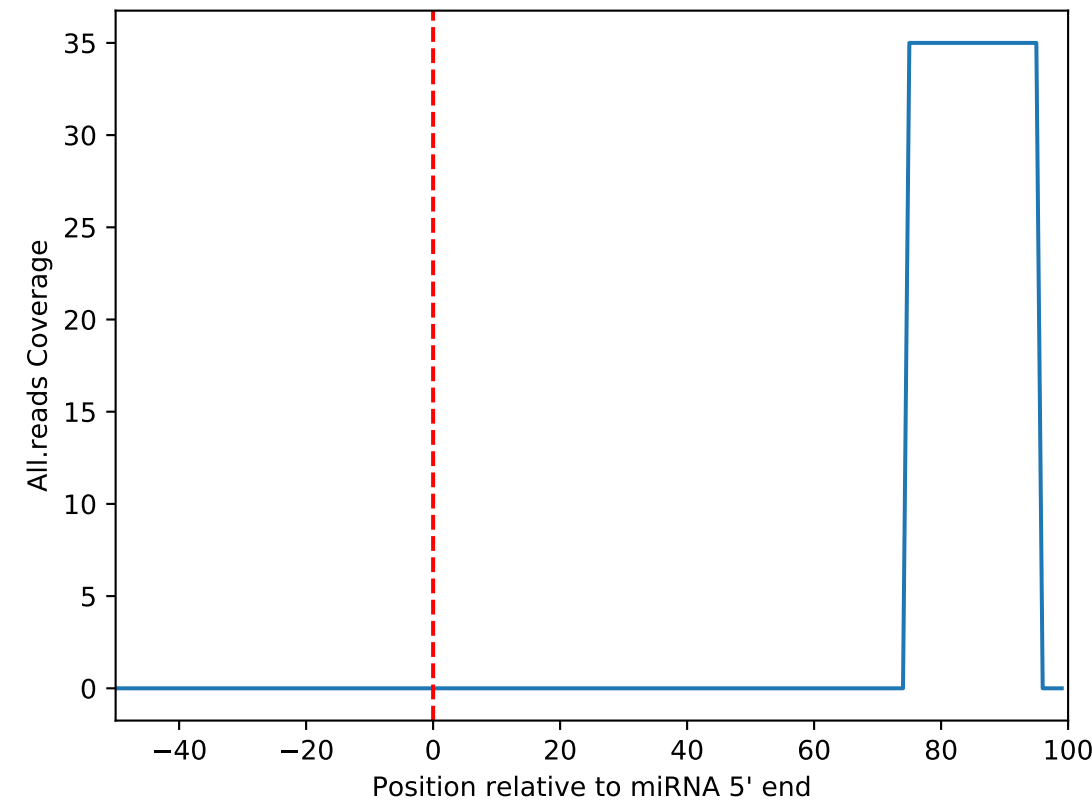

mir-3643 (chr2R:17766460(-))

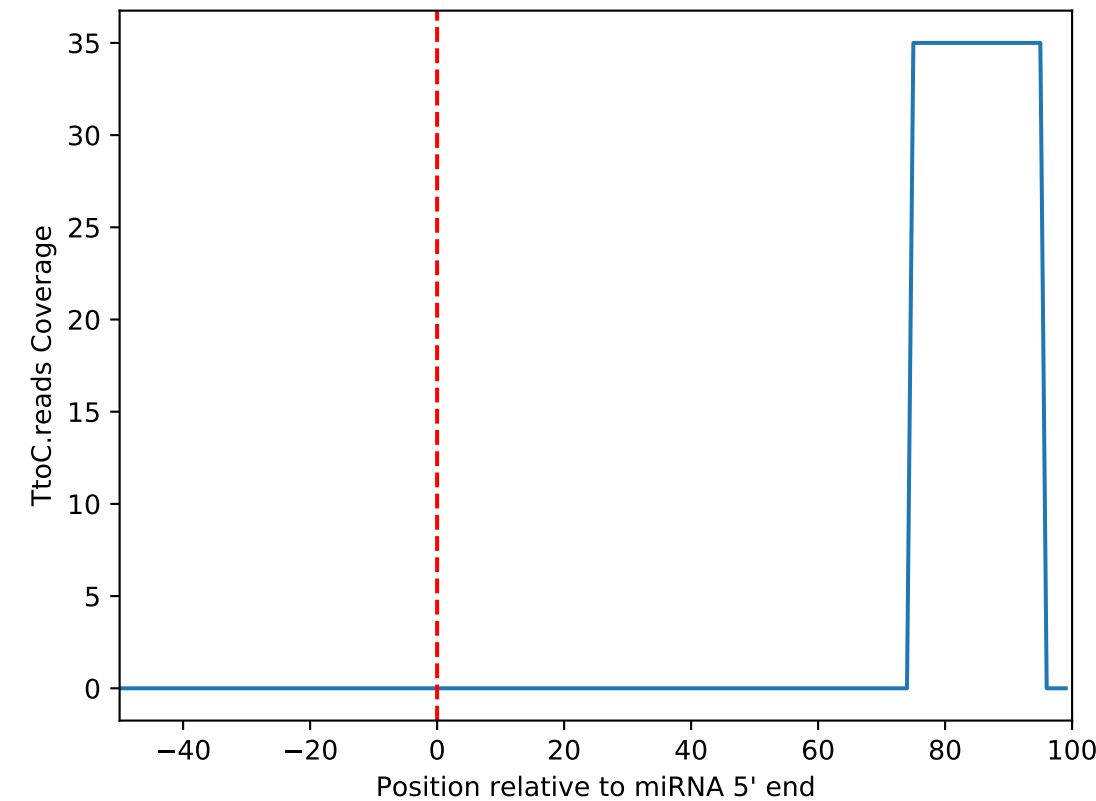

mir-3643 (chr2R:17766460(-))

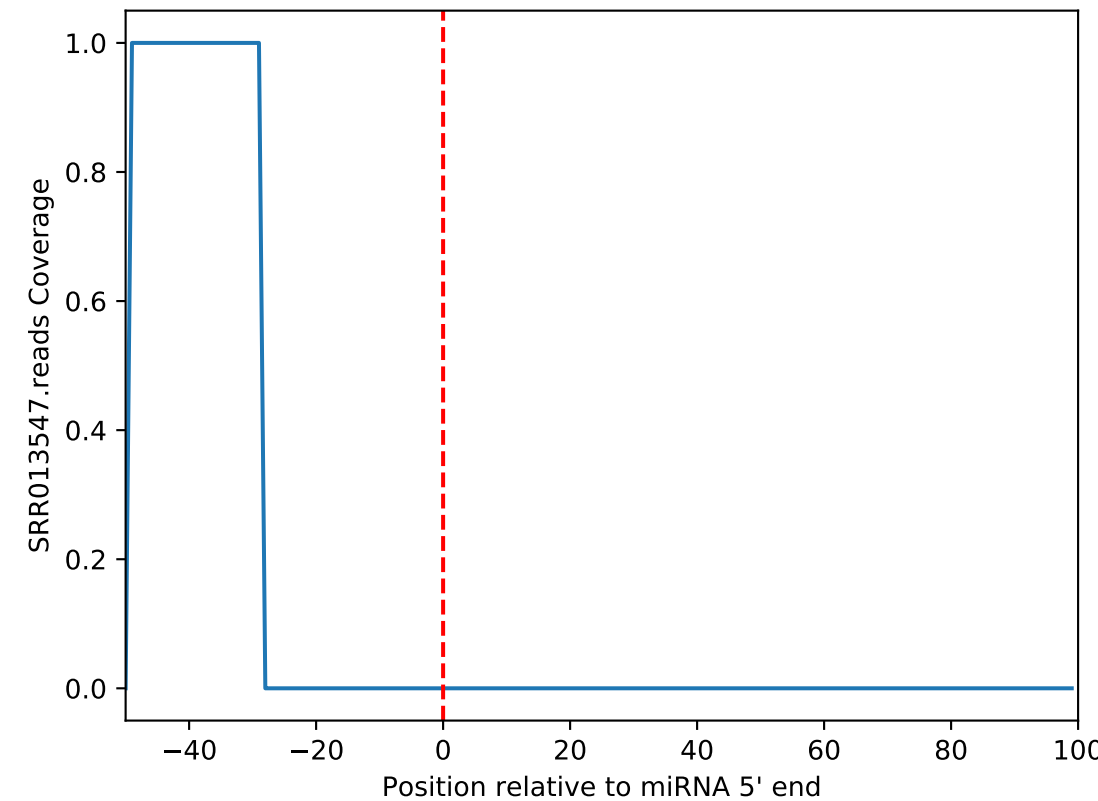

mir-3643 (chr2R:17766460(-))

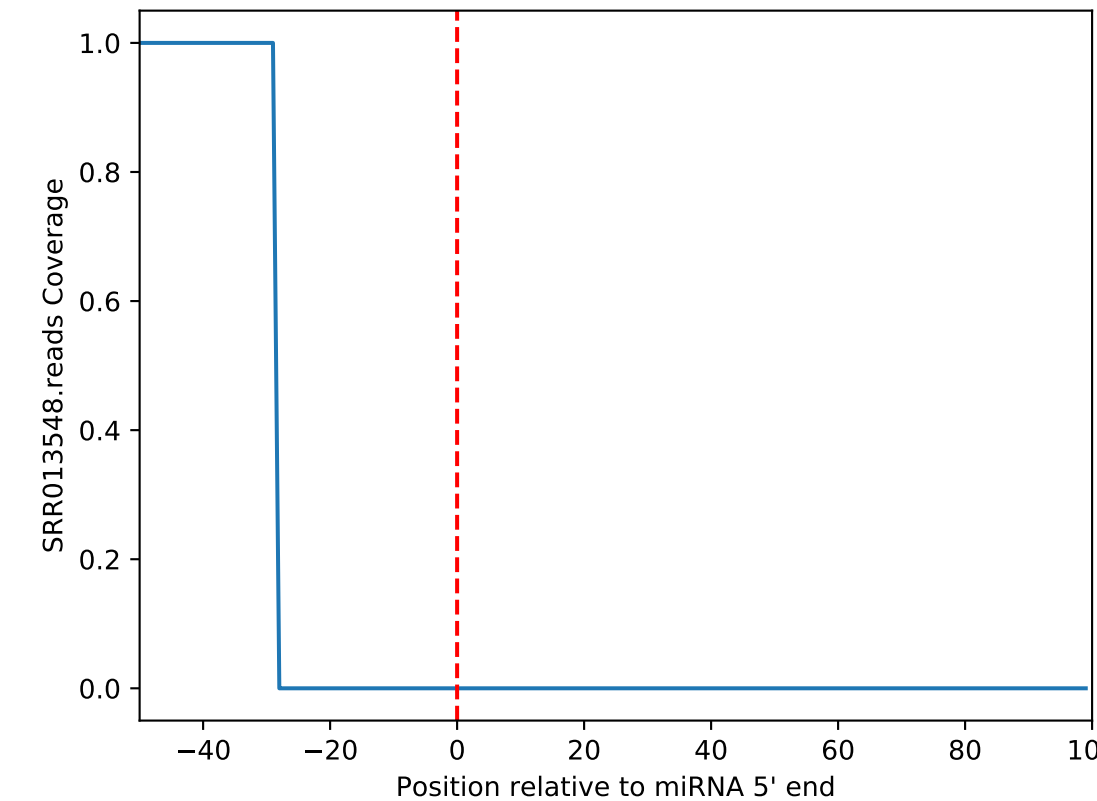

mir-137 (chr2R:16065329(-))

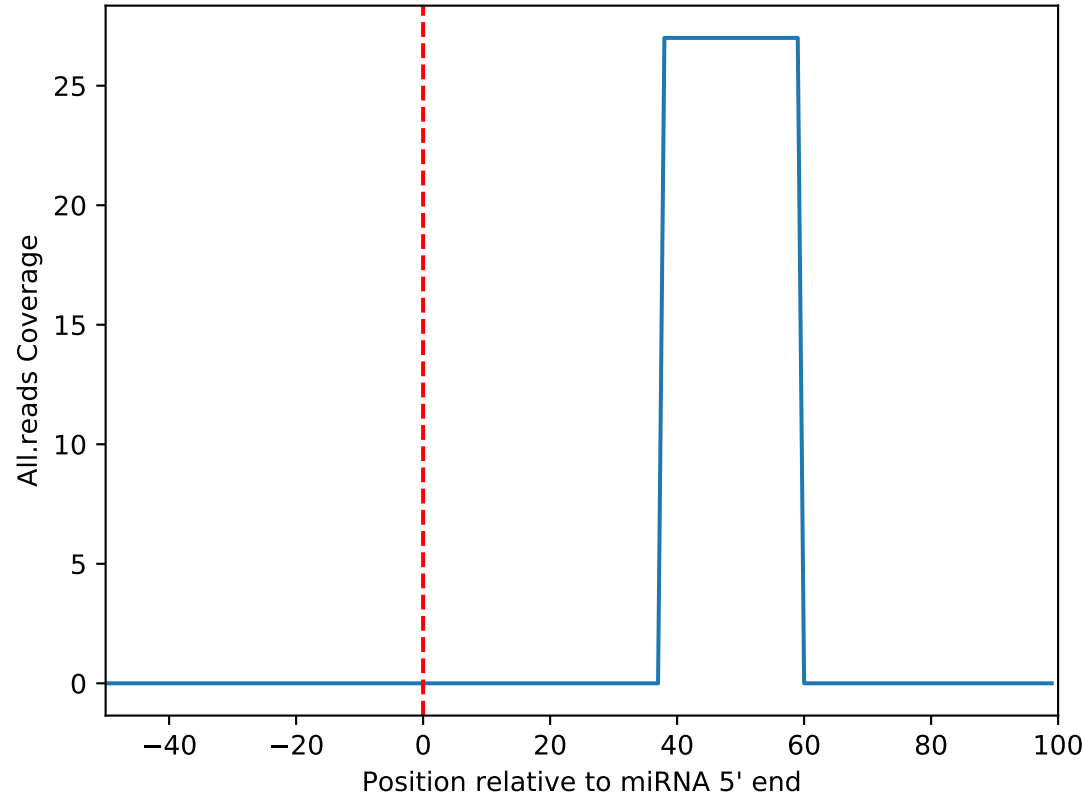

mir-137 (chr2R:16065329(-))



mir-137 (chr2R:16065329(-))



mir-137 (chr2R:16065329(-))

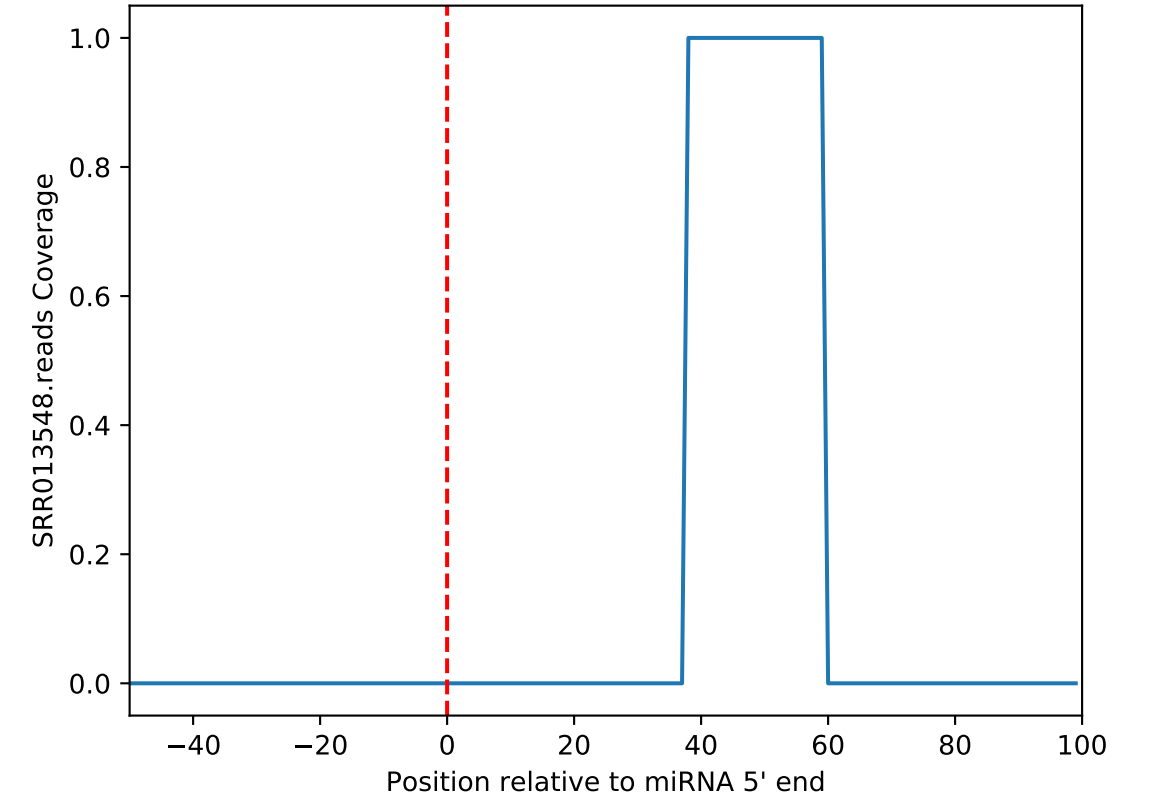

mir-iab-8 (chr3R:16856337(-))

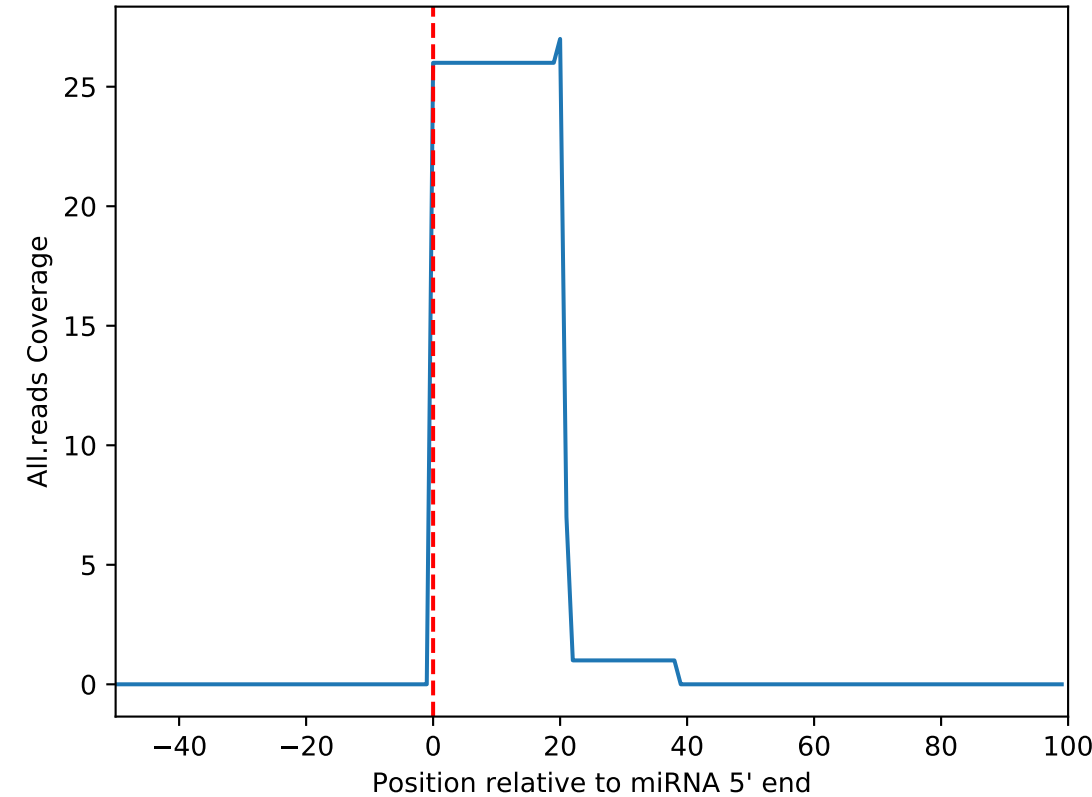

mir-iab-8 (chr3R:16856337(-))

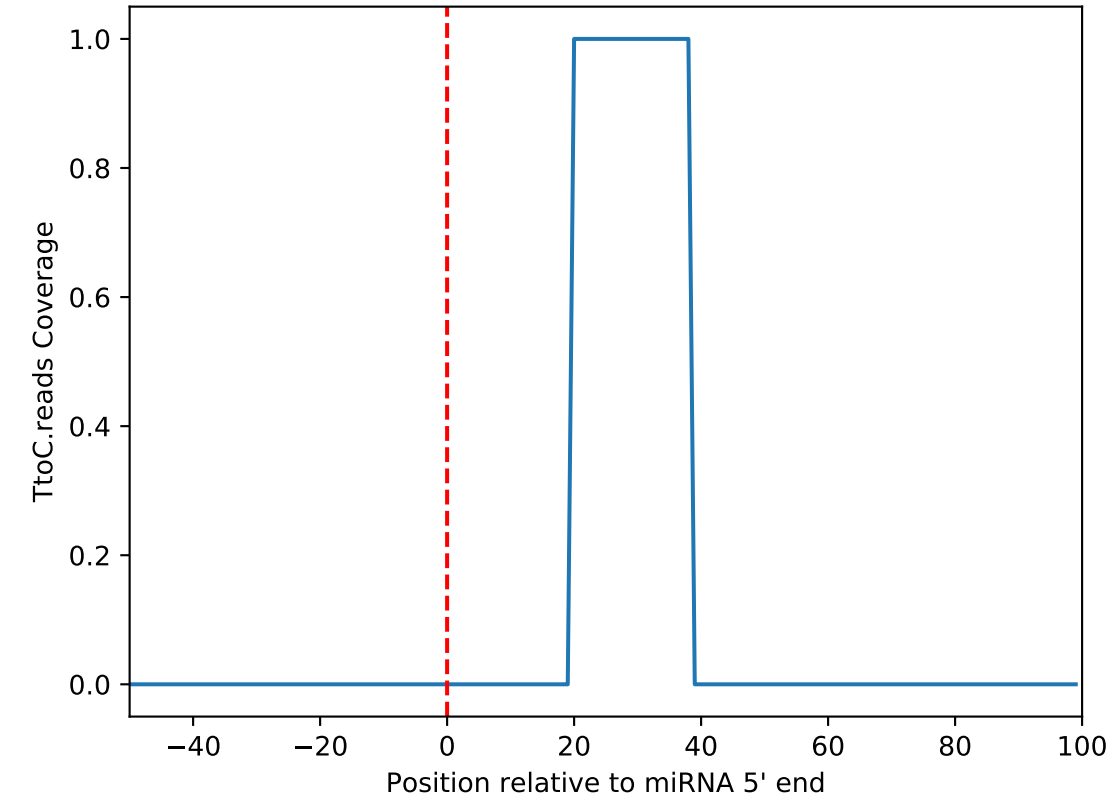

mir-iab-8 (chr3R:16856337(-))

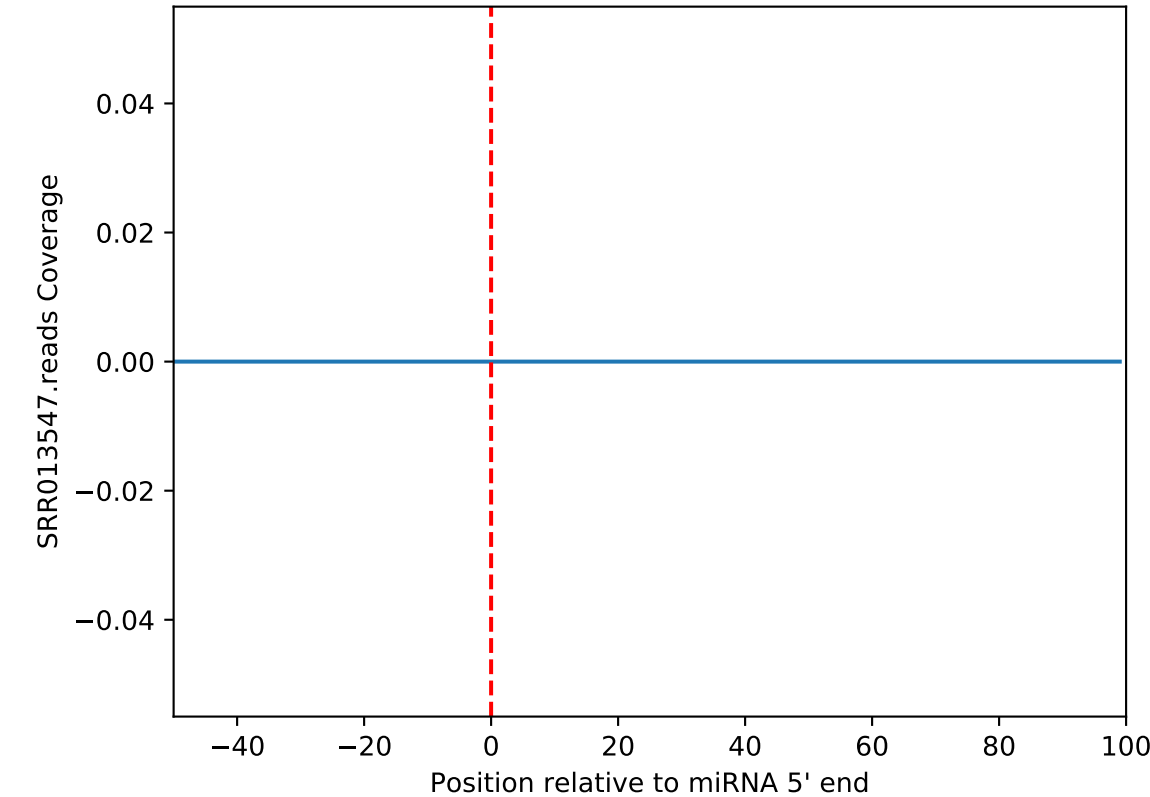

mir-iab-8 (chr3R:16856337(-))

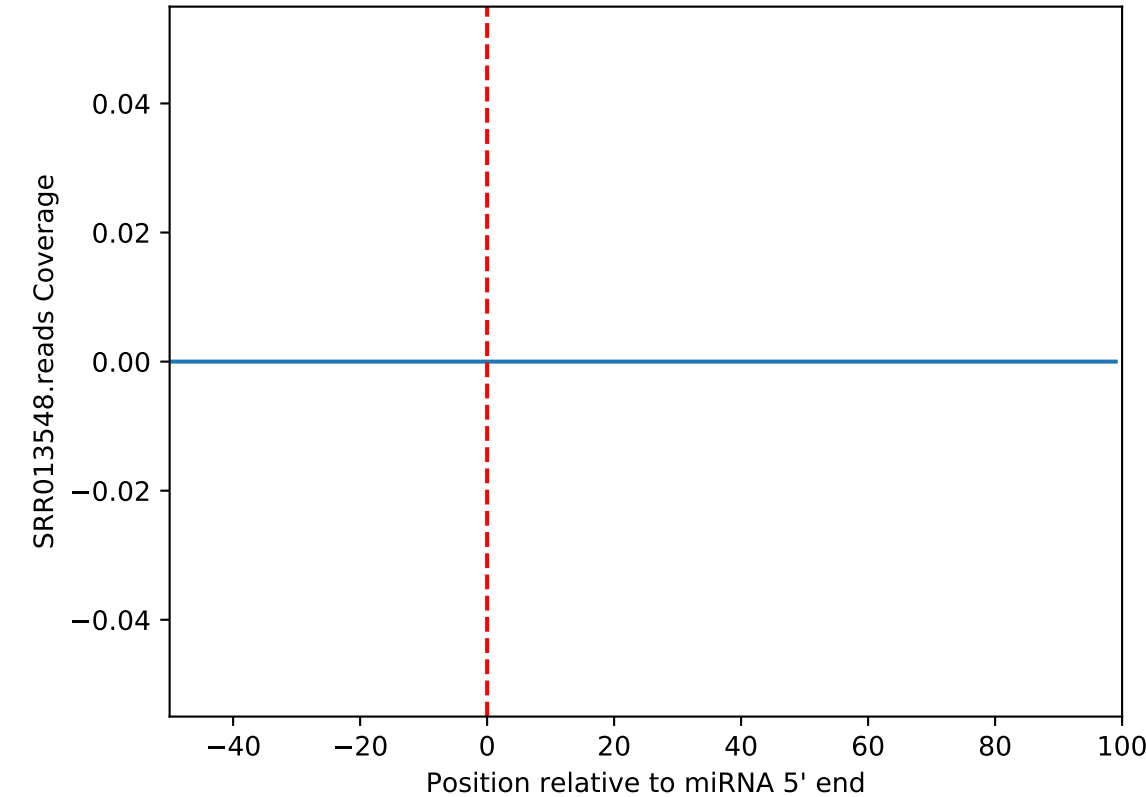

mir-3642 (chr3L:11629505(+))

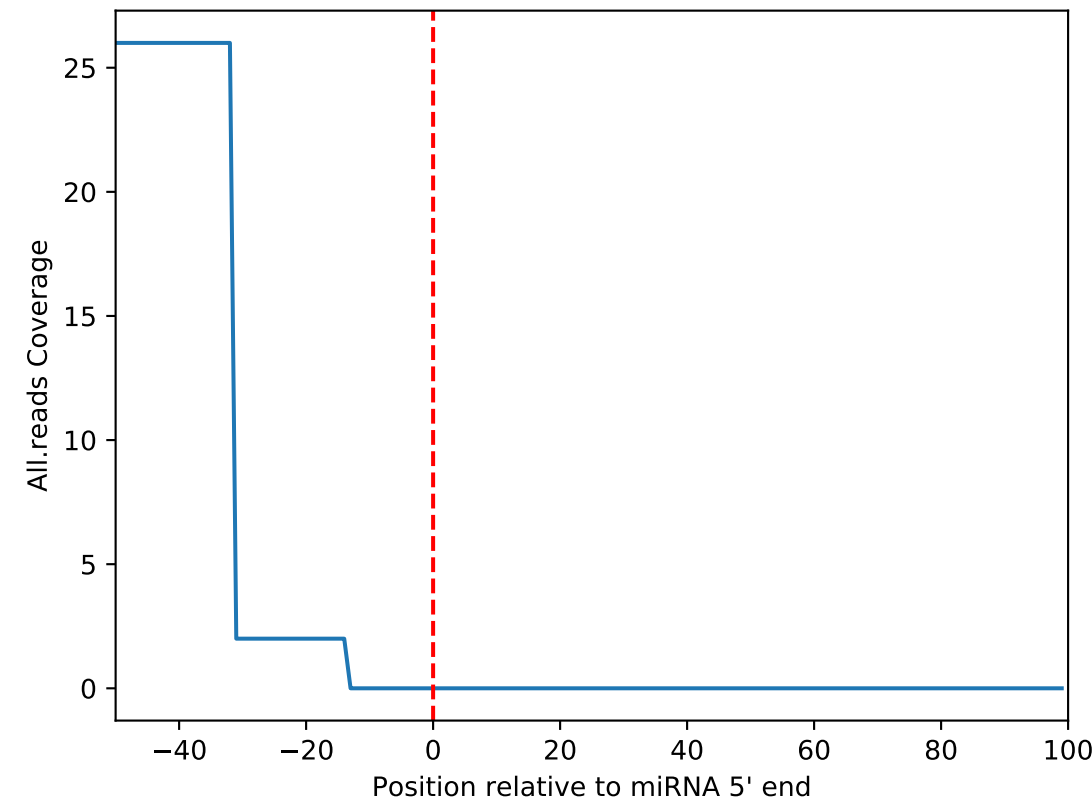

mir-3642 (chr3L:11629505(+))

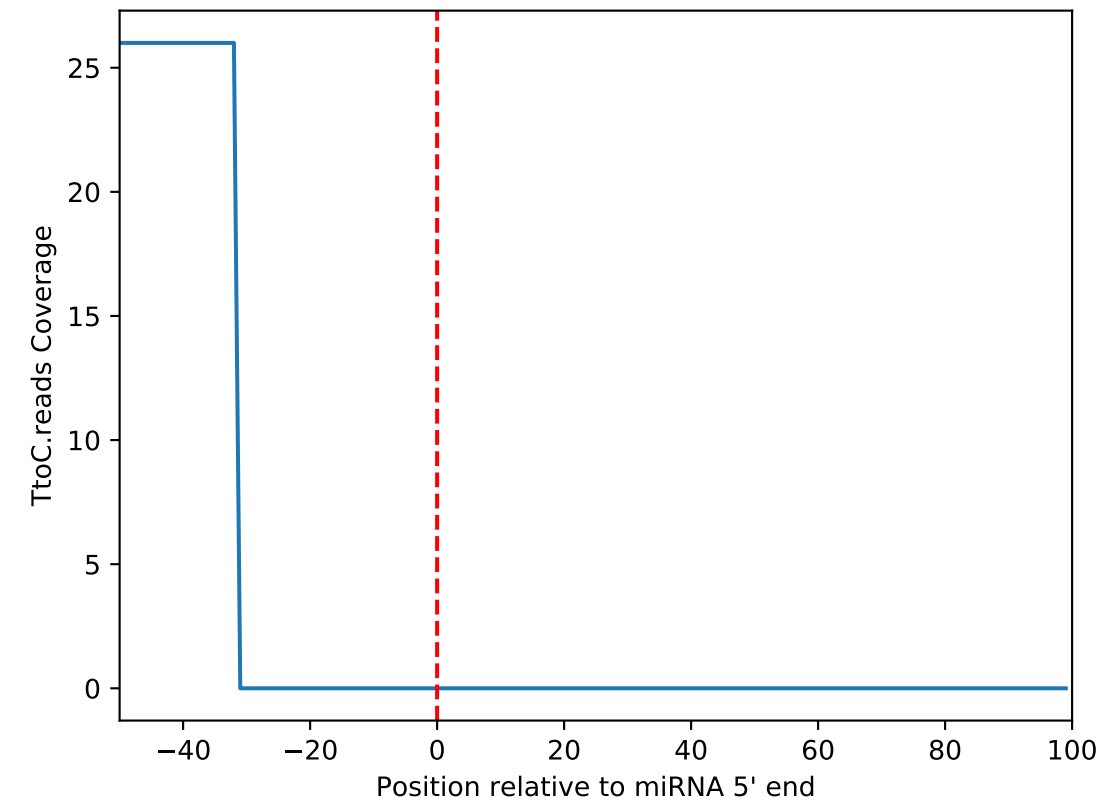

mir-3642 (chr3L:11629505(+))



mir-3642 (chr3L:11629505(+))

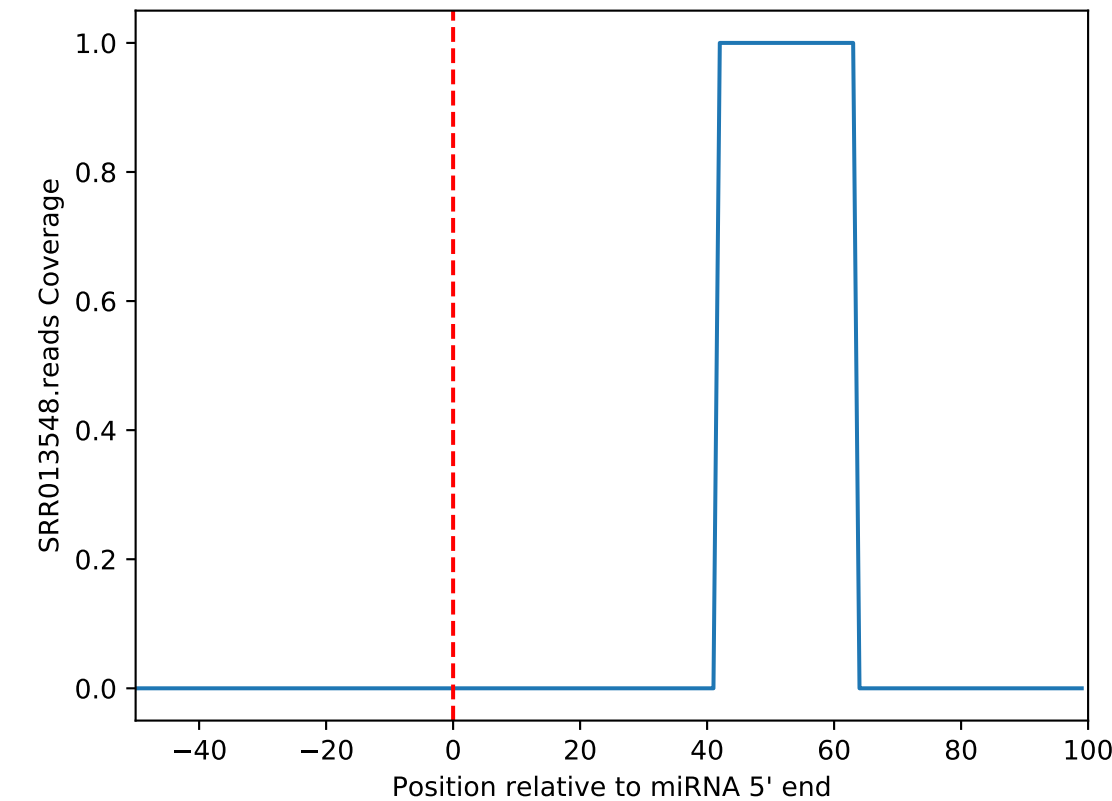



mir-2492 (chrX:11547430(+))

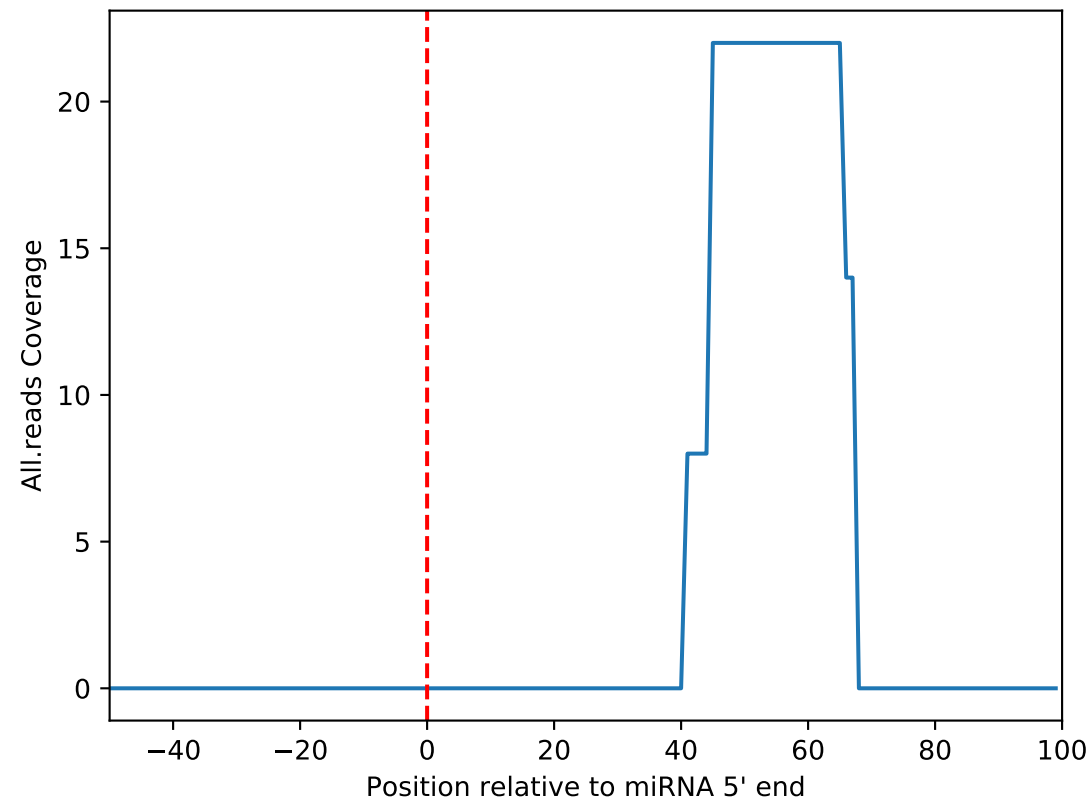

mir-2492 (chrX:11547430(+))

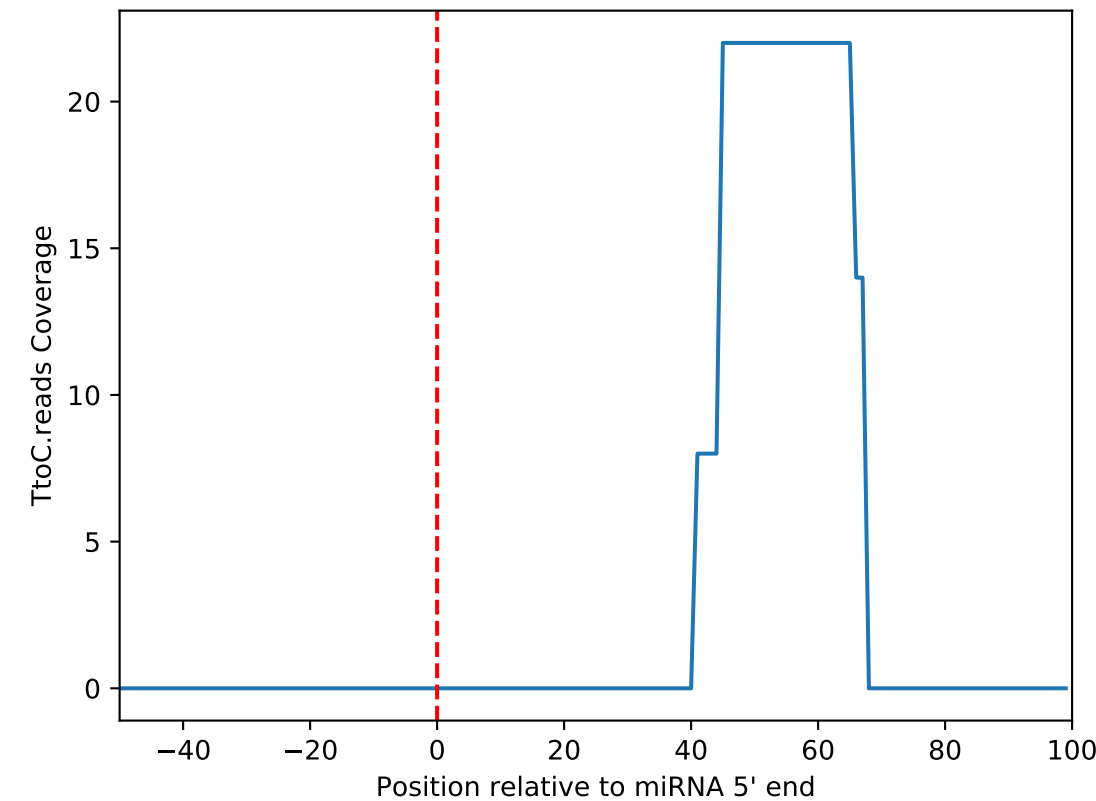

mir-2492 (chrX:11547430(+))



mir-2492 (chrX:11547430(+))

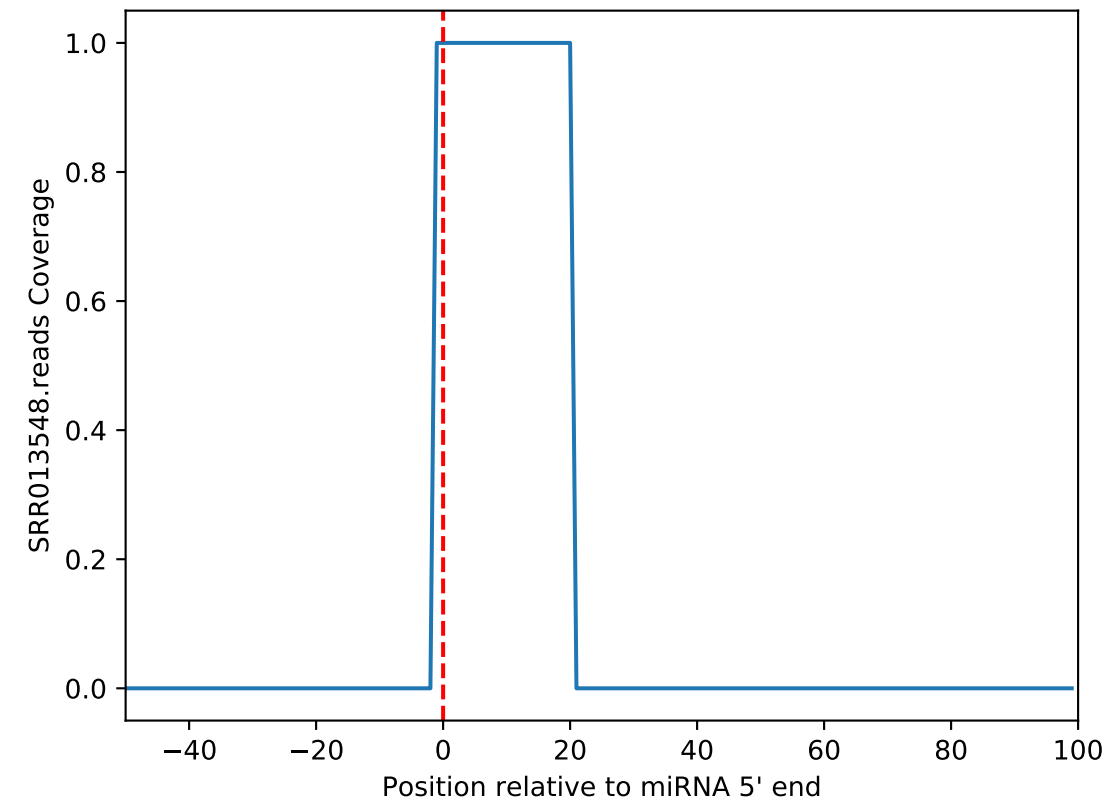

mir-9372 (chrX:633751(-))

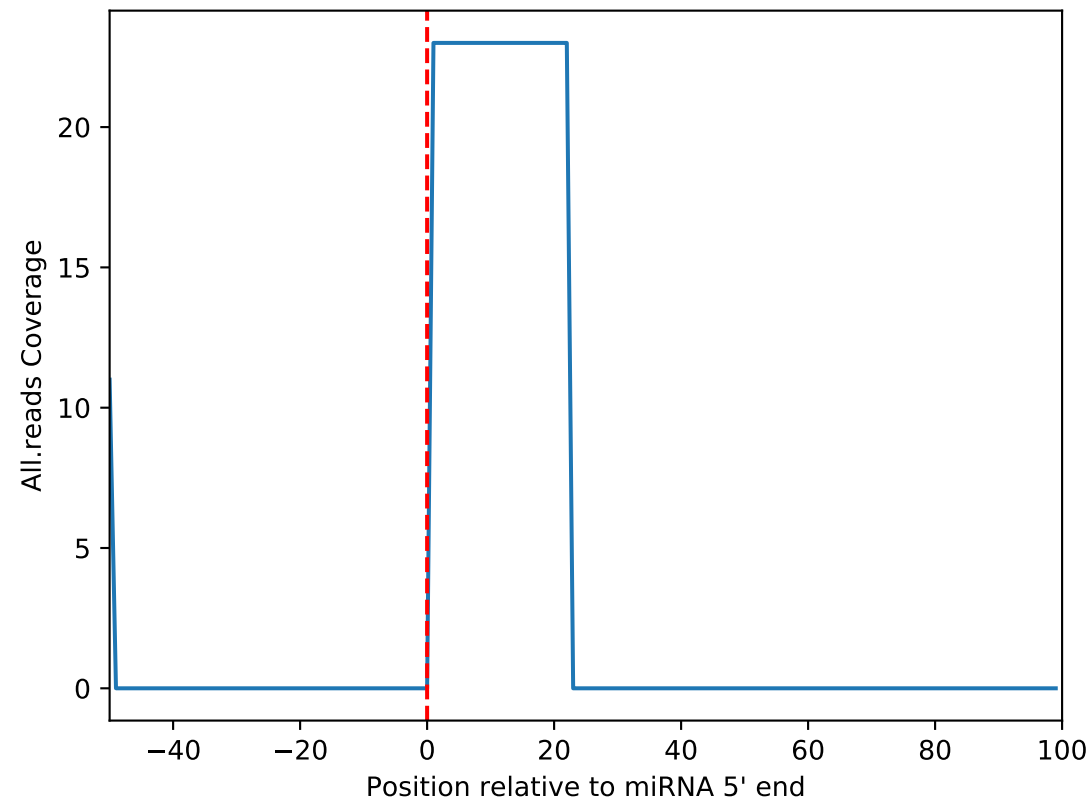

mir-9372 (chrX:633751(-))

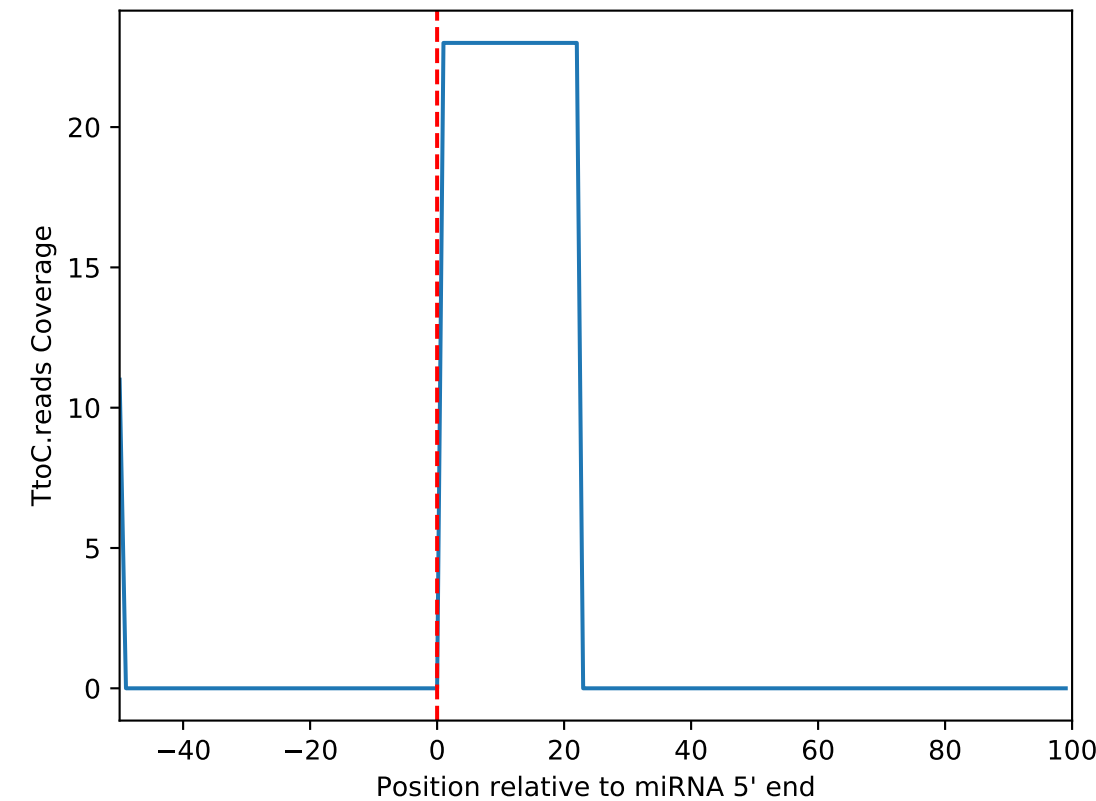

mir-9372 (chrX:633751(-))

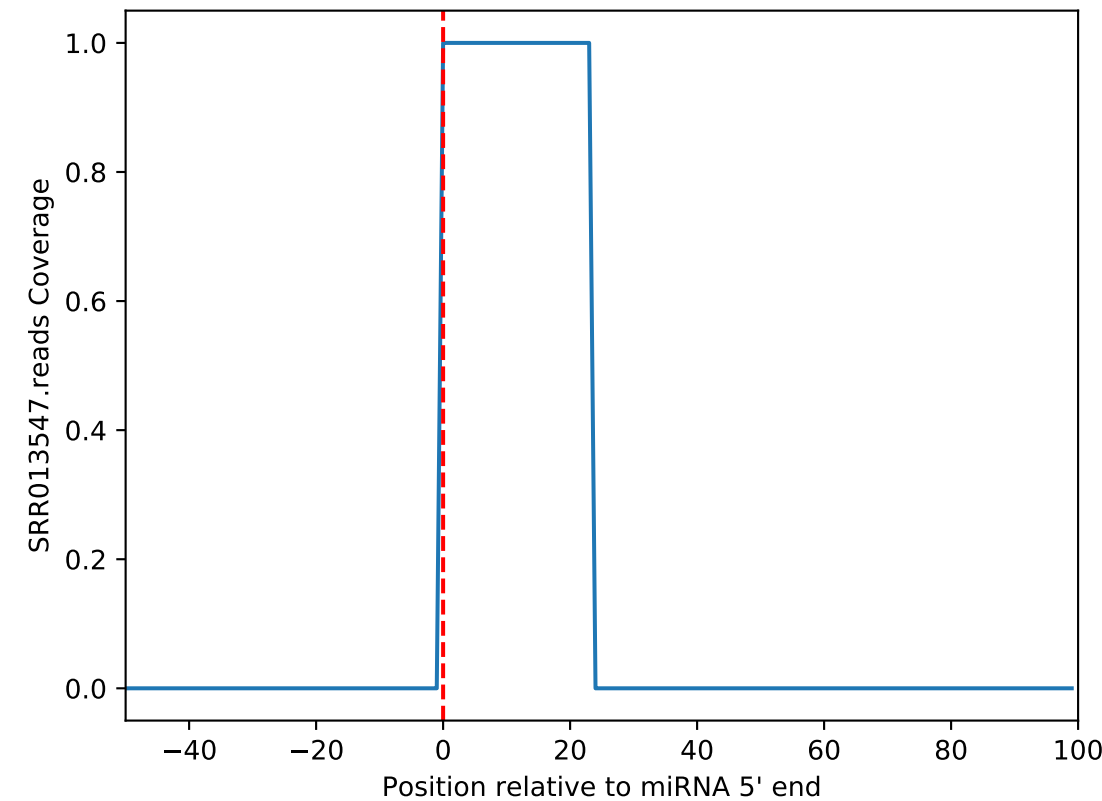

mir-9372 (chrX:633751(-))



mir-285 (chr3L:11946179(-))

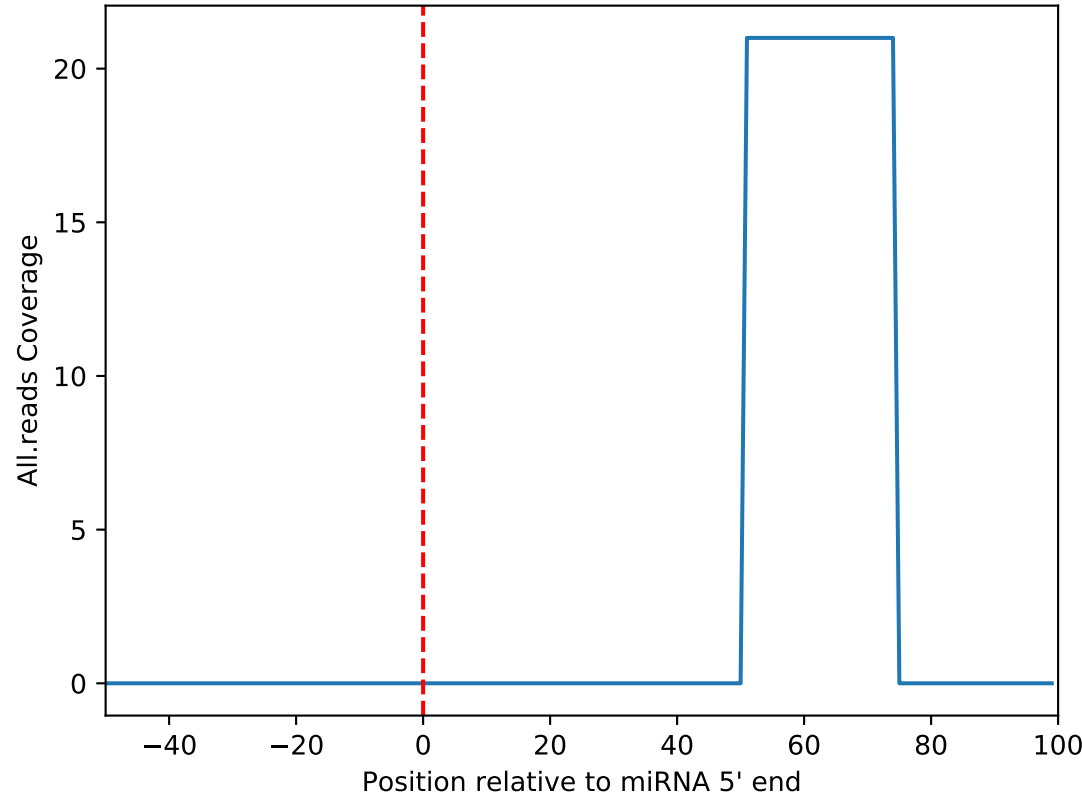

mir-285 (chr3L:11946179(-))



mir-285 (chr3L:11946179(-))



mir-285 (chr3L:11946179(-))



mir-210 (chrX:18128234(+))

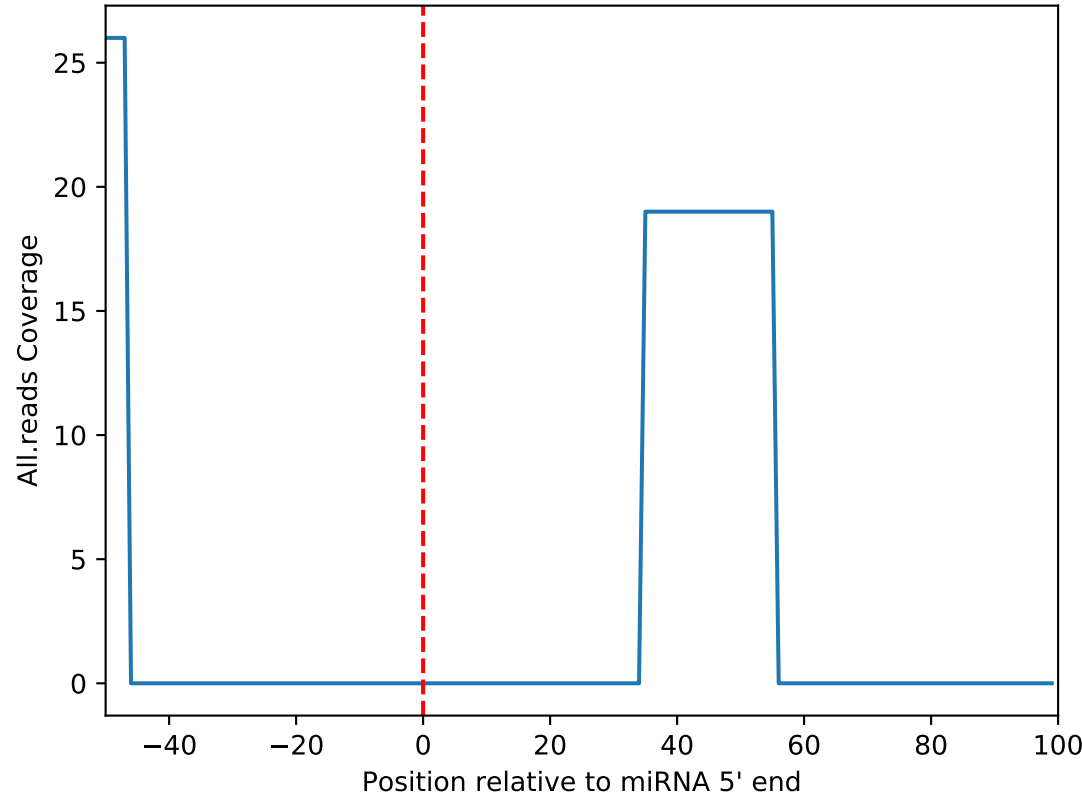

mir-210 (chrX:18128234(+))



mir-210 (chrX:18128234(+))

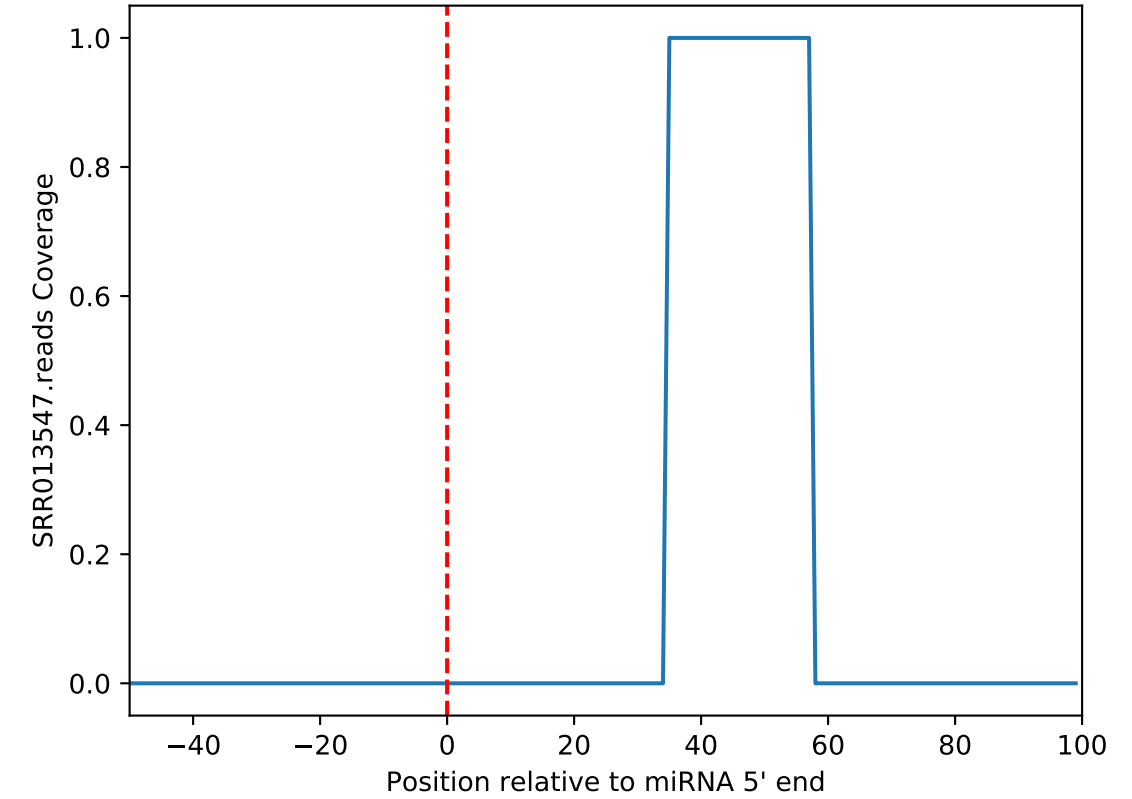

mir-210 (chrX:18128234(+))



mir-9383 (chr3R:15221795(+))

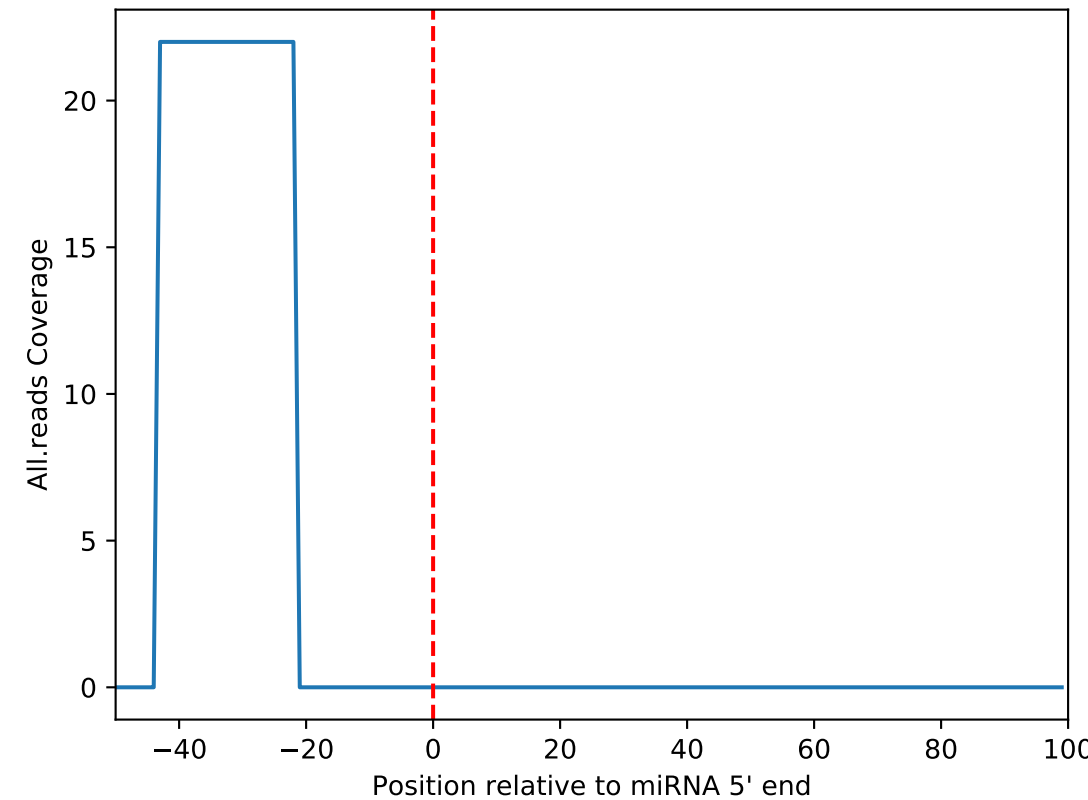

mir-9383 (chr3R:15221795(+))

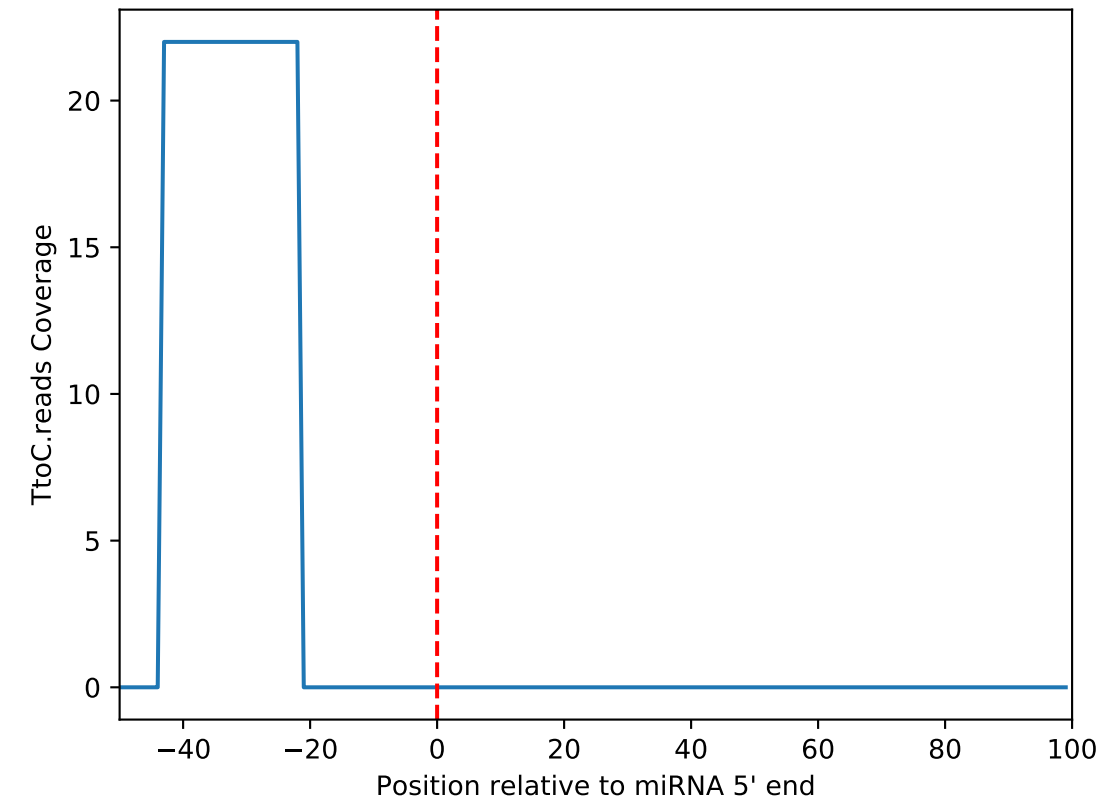

mir-9383 (chr3R:15221795(+))



mir-9383 (chr3R:15221795(+))

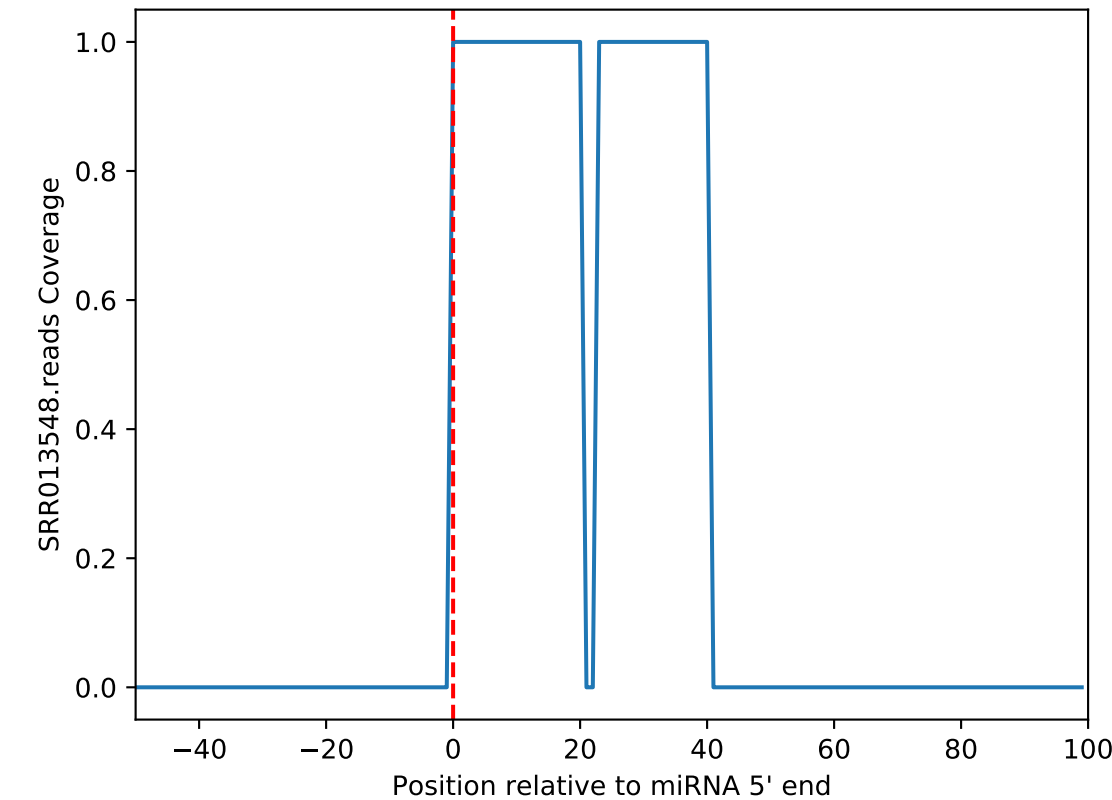

mir-1007 (chrX:21296445(-))

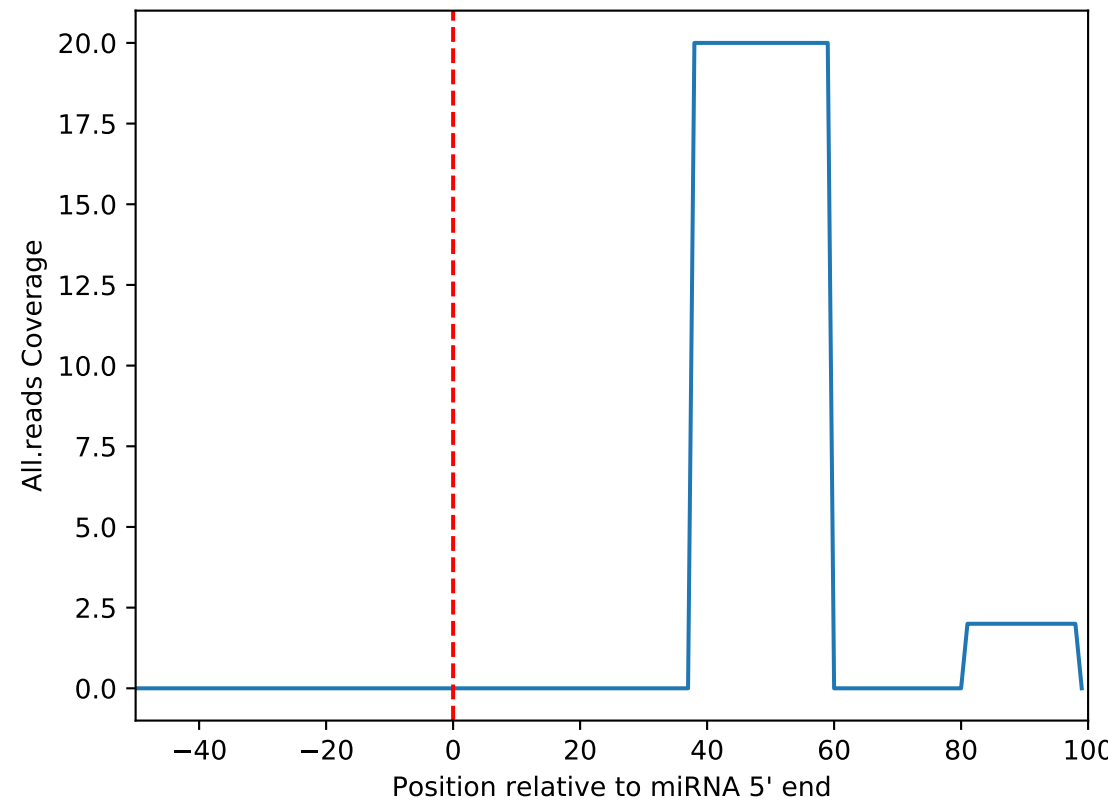

mir-1007 (chrX:21296445(-))

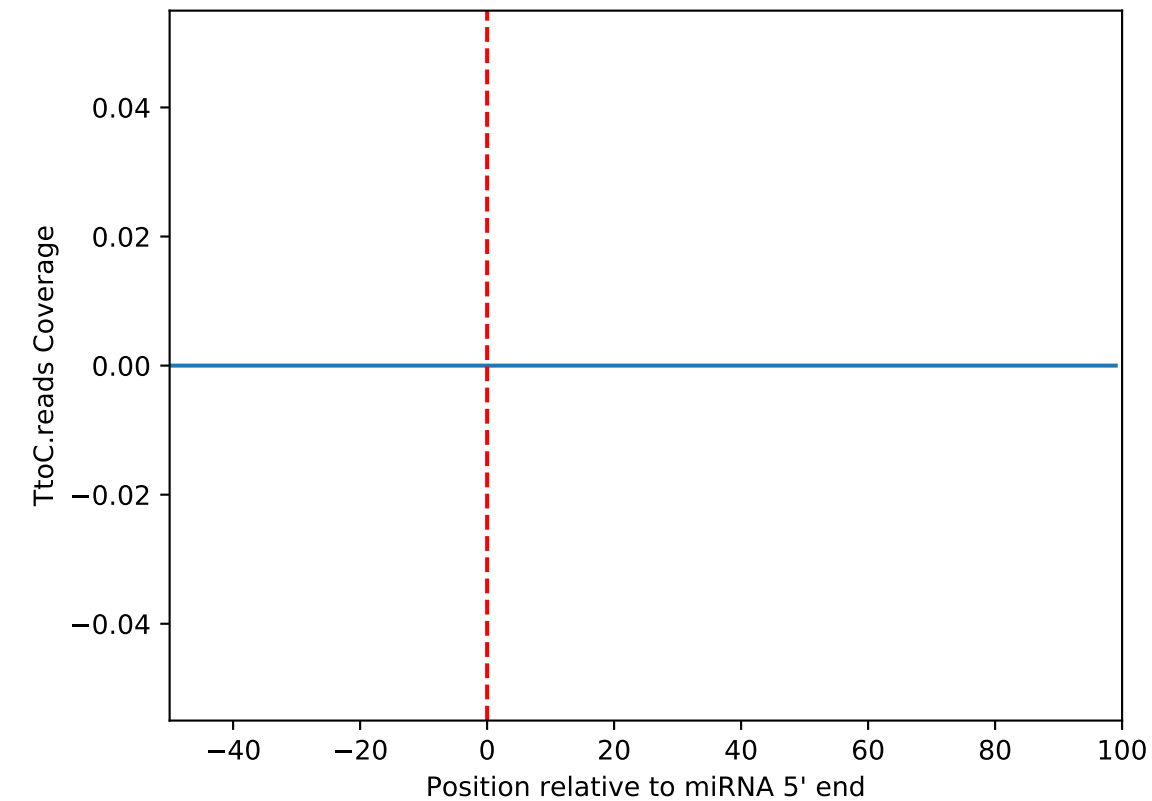

mir-1007 (chrX:21296445(-))

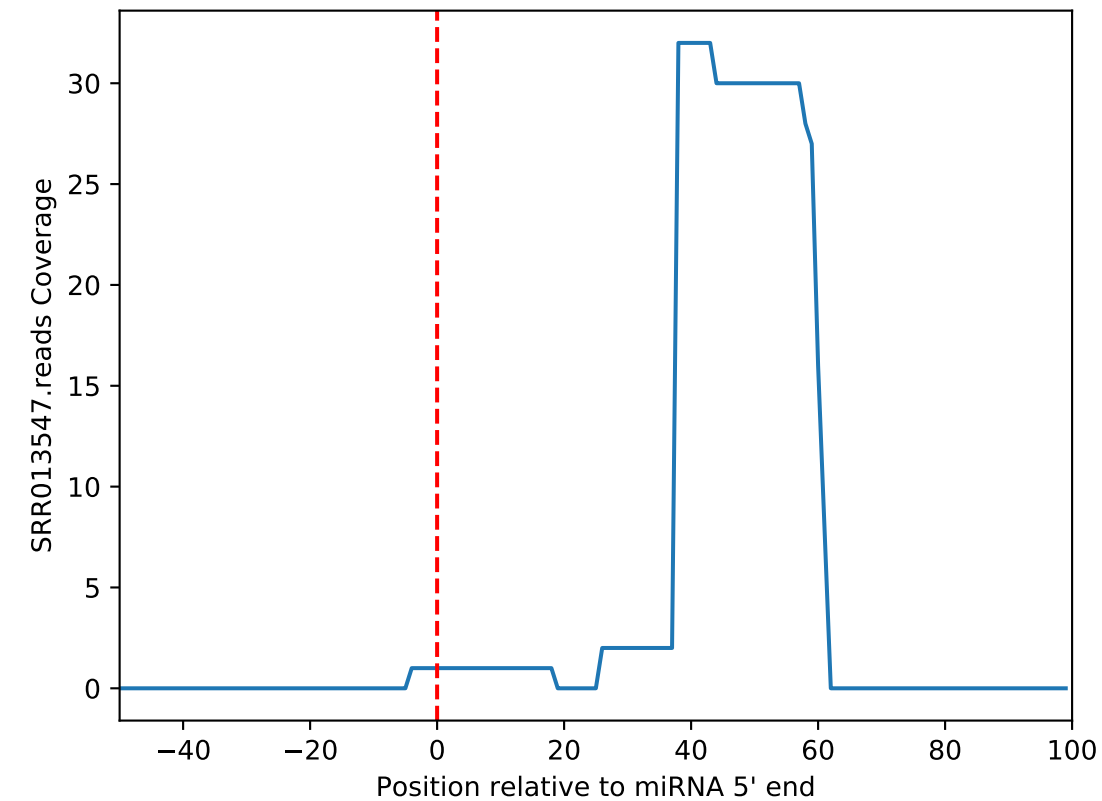

mir-1007 (chrX:21296445(-))

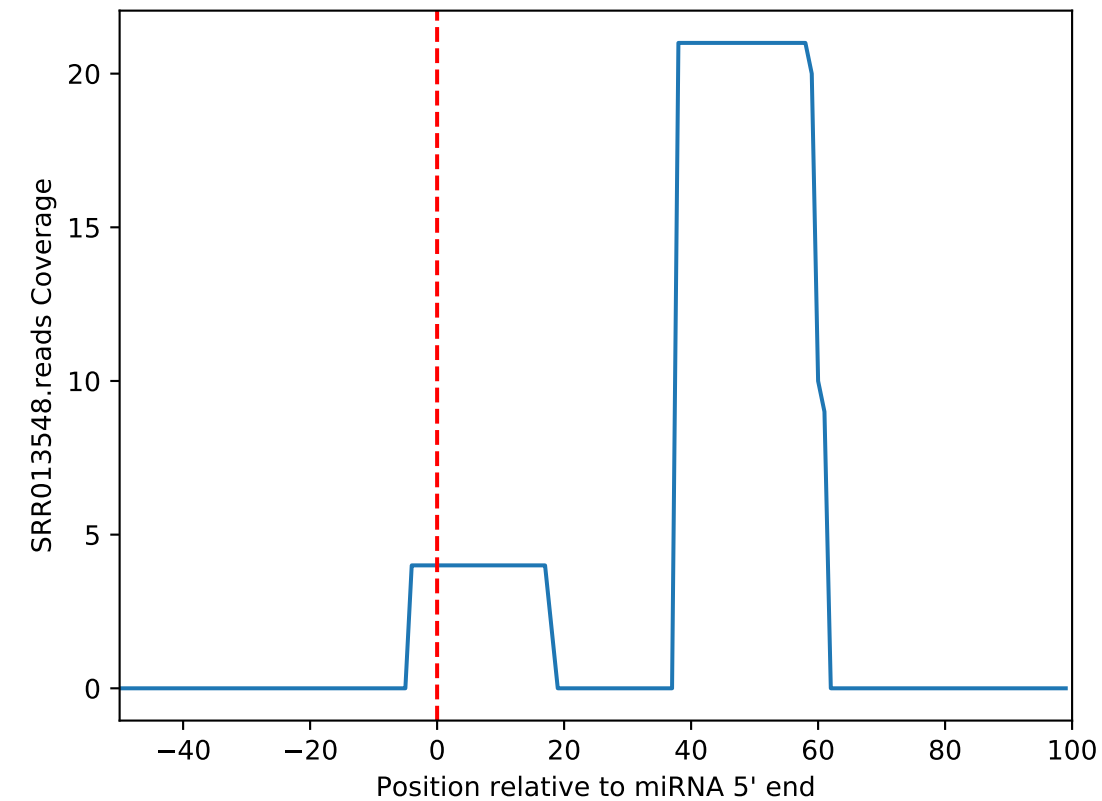

mir-133 (chr2L:20616635(+))

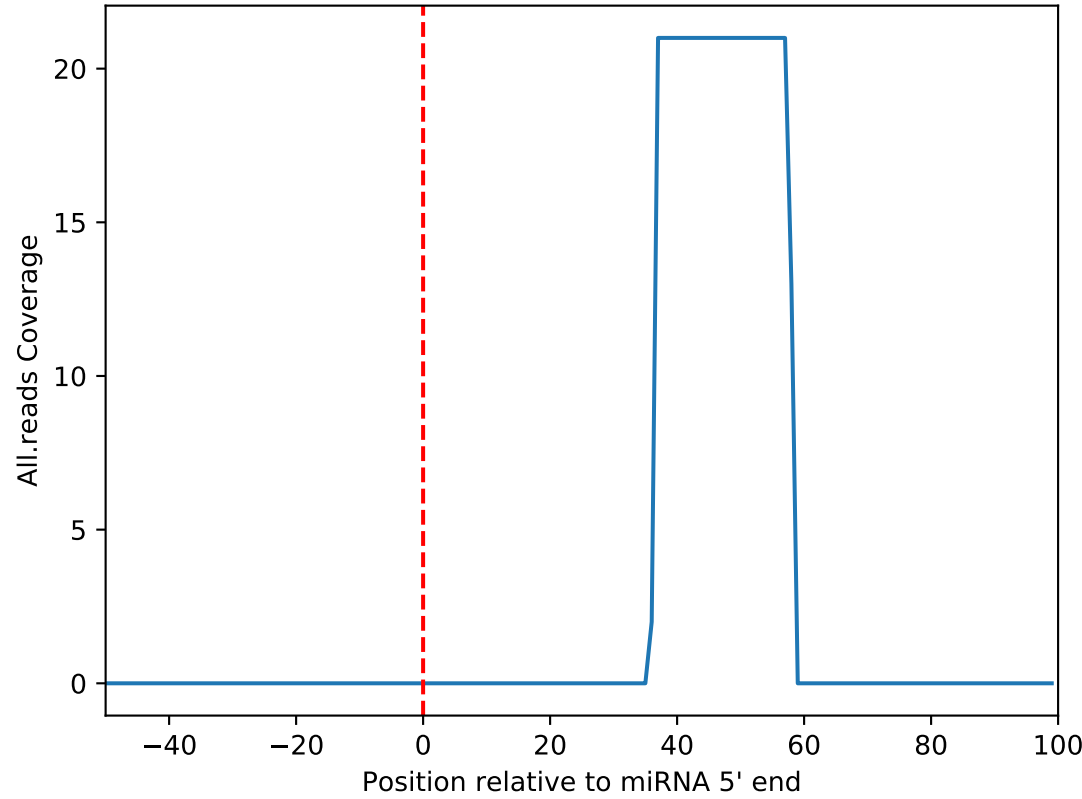

mir-133 (chr2L:20616635(+))



mir-133 (chr2L:20616635(+))



mir-133 (chr2L:20616635(+))



mir-2499 (chrX:19557029(+))

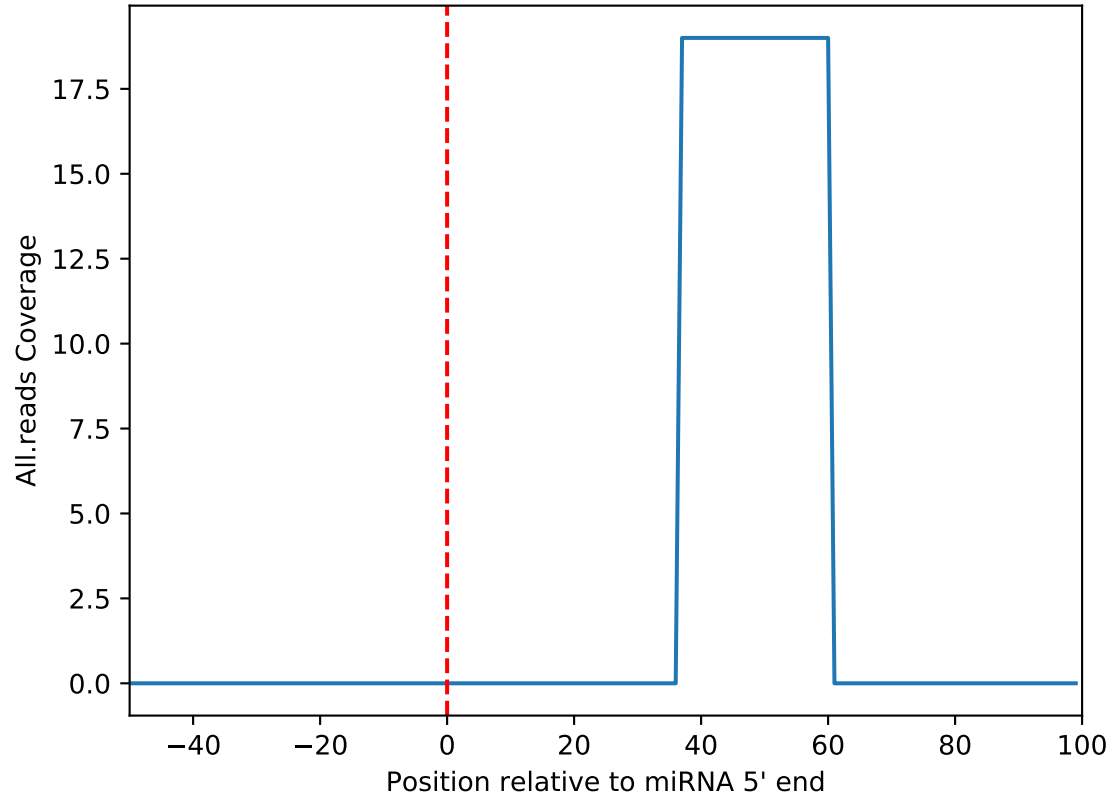

mir-2499 (chrX:19557029(+))



mir-2499 (chrX:19557029(+))

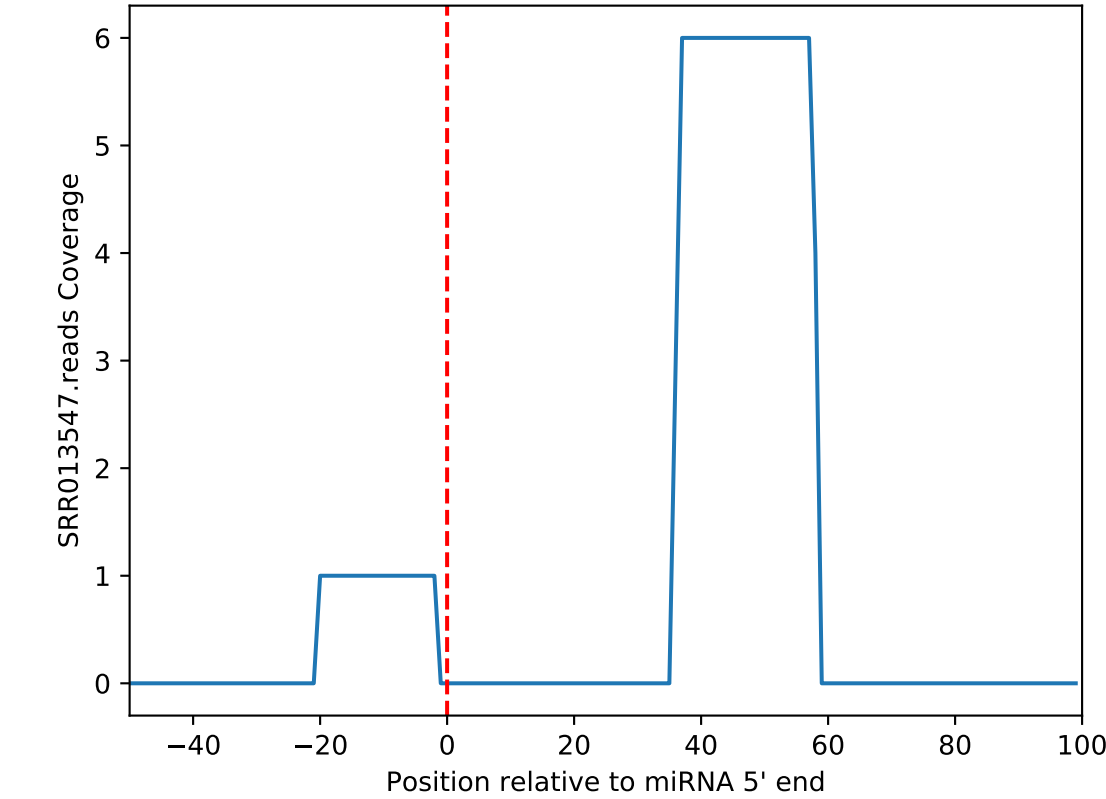

mir-2499 (chrX:19557029(+))





mir-9379 (chr2R:13852901(-))

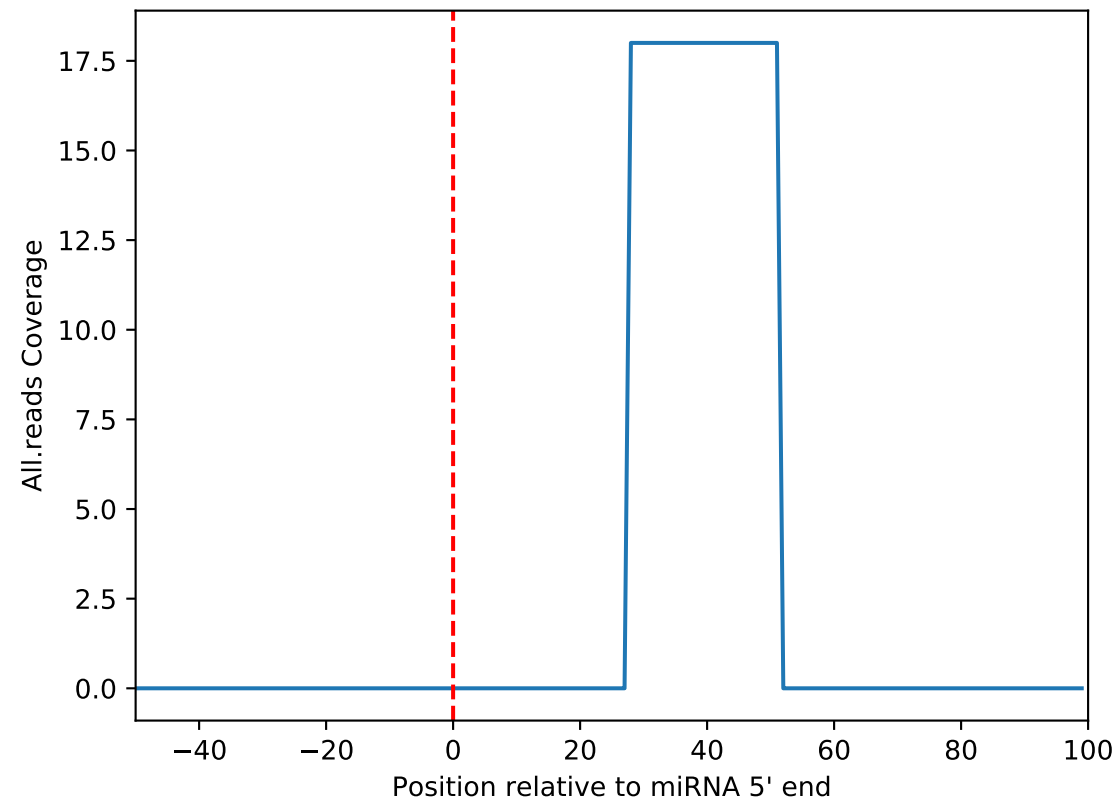

mir-9379 (chr2R:13852901(-))

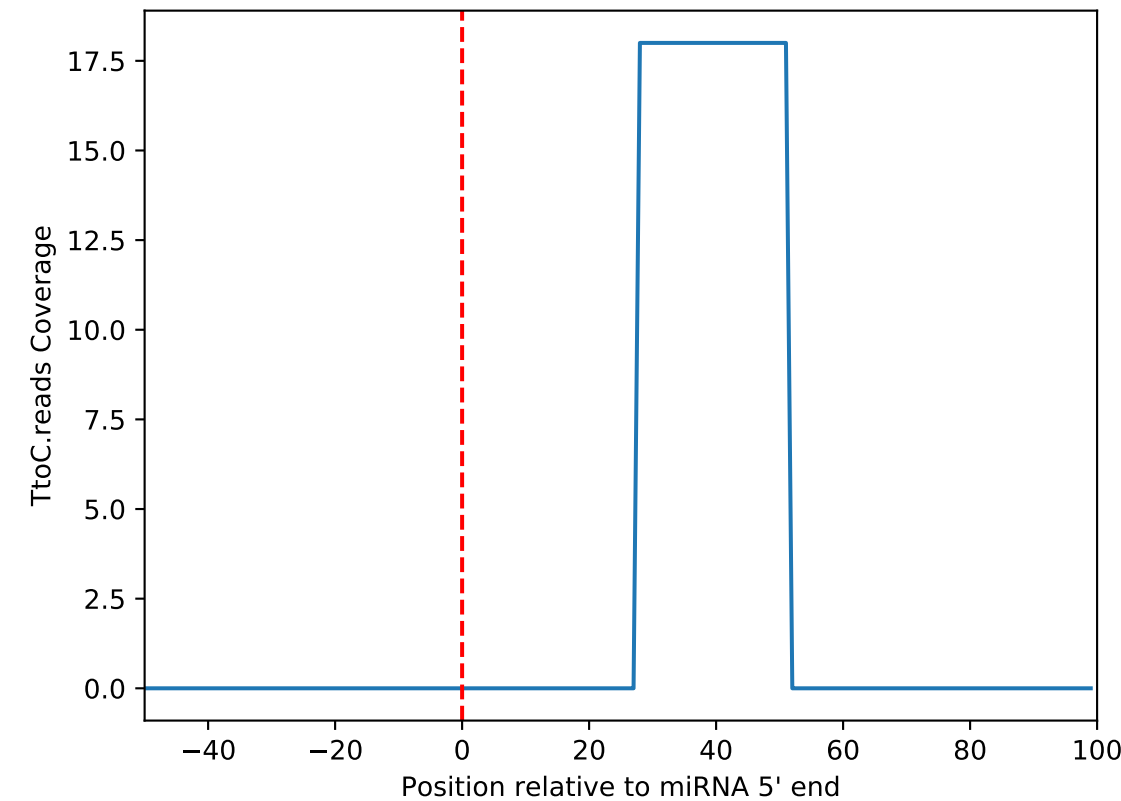

mir-9379 (chr2R:13852901(-))



mir-9379 (chr2R:13852901(-))

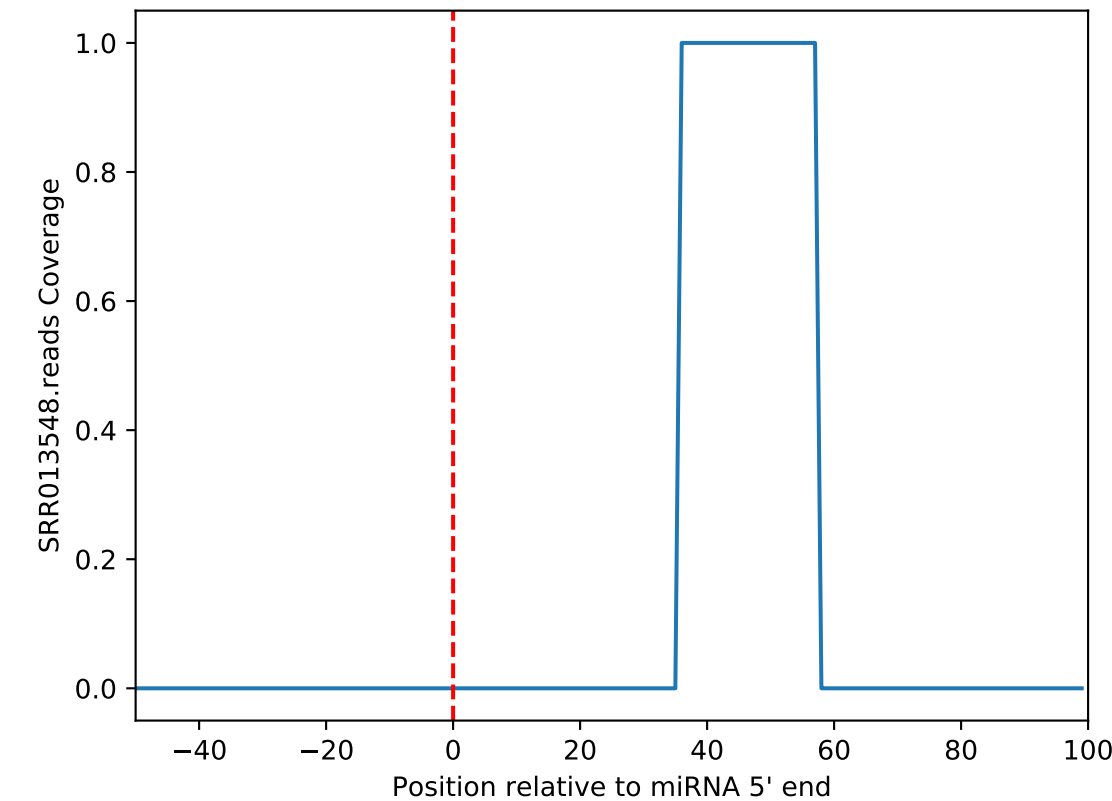

mir-1014 (chr3R:31753590(-))

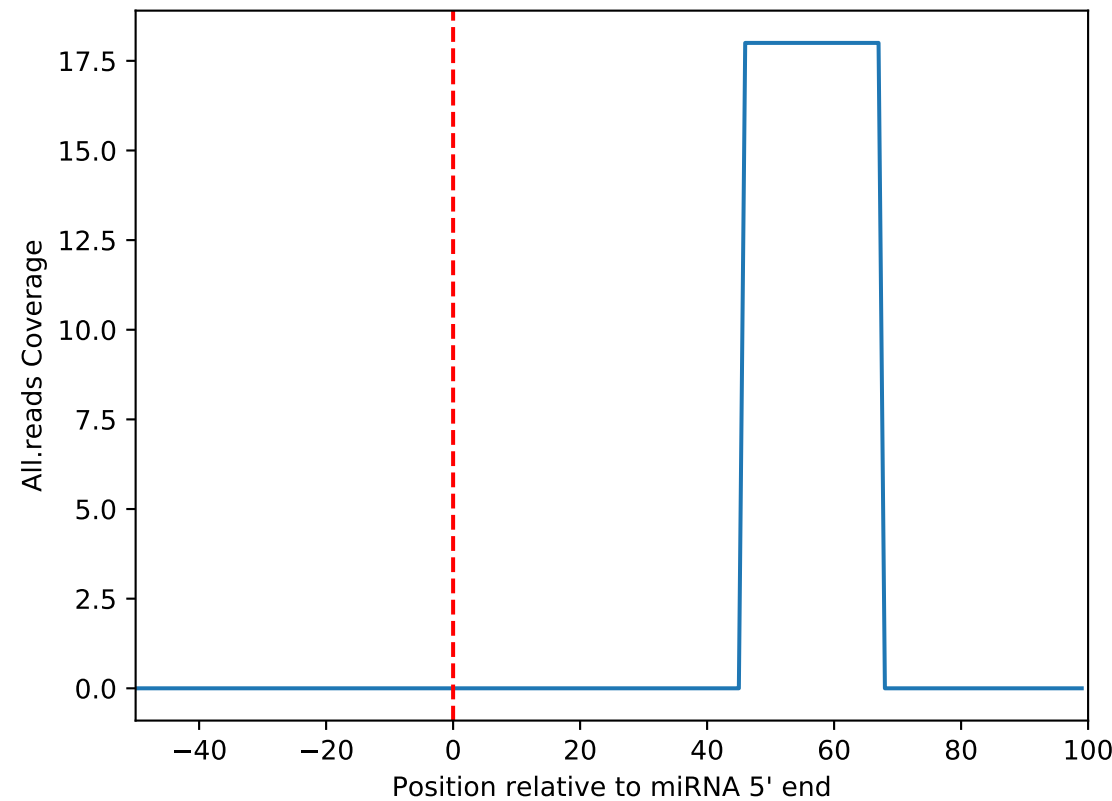

mir-1014 (chr3R:31753590(-))

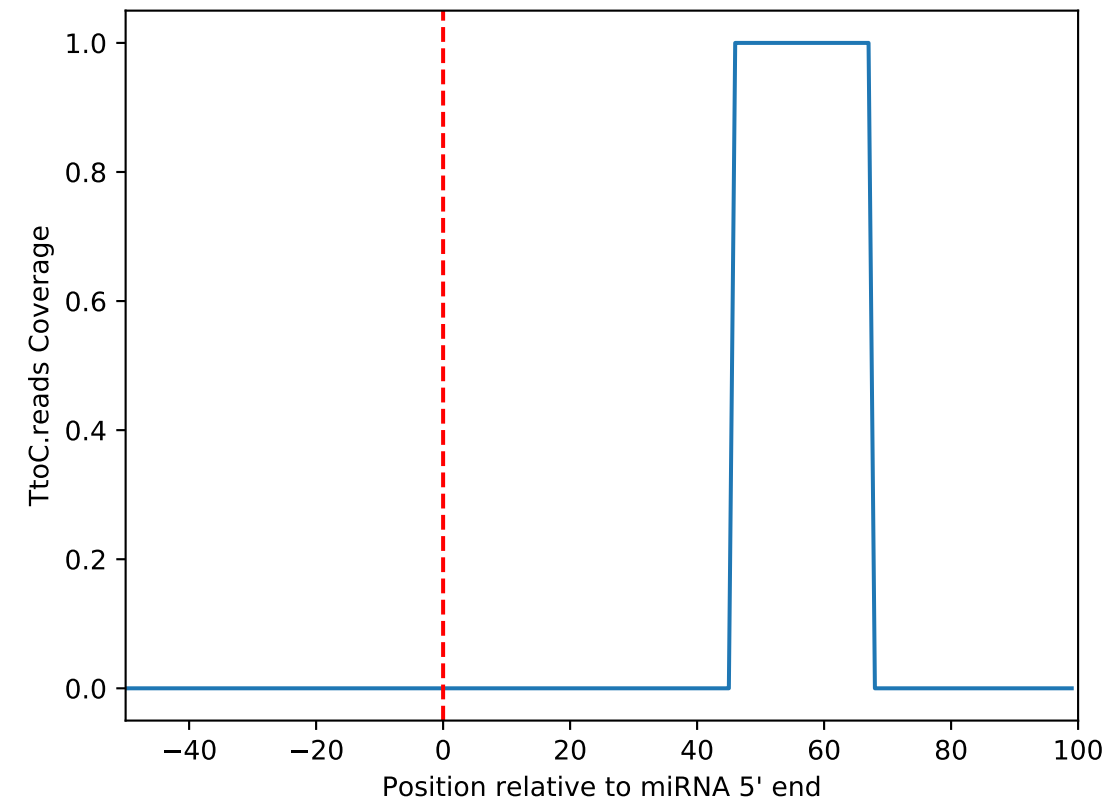

mir-1014 (chr3R:31753590(-))

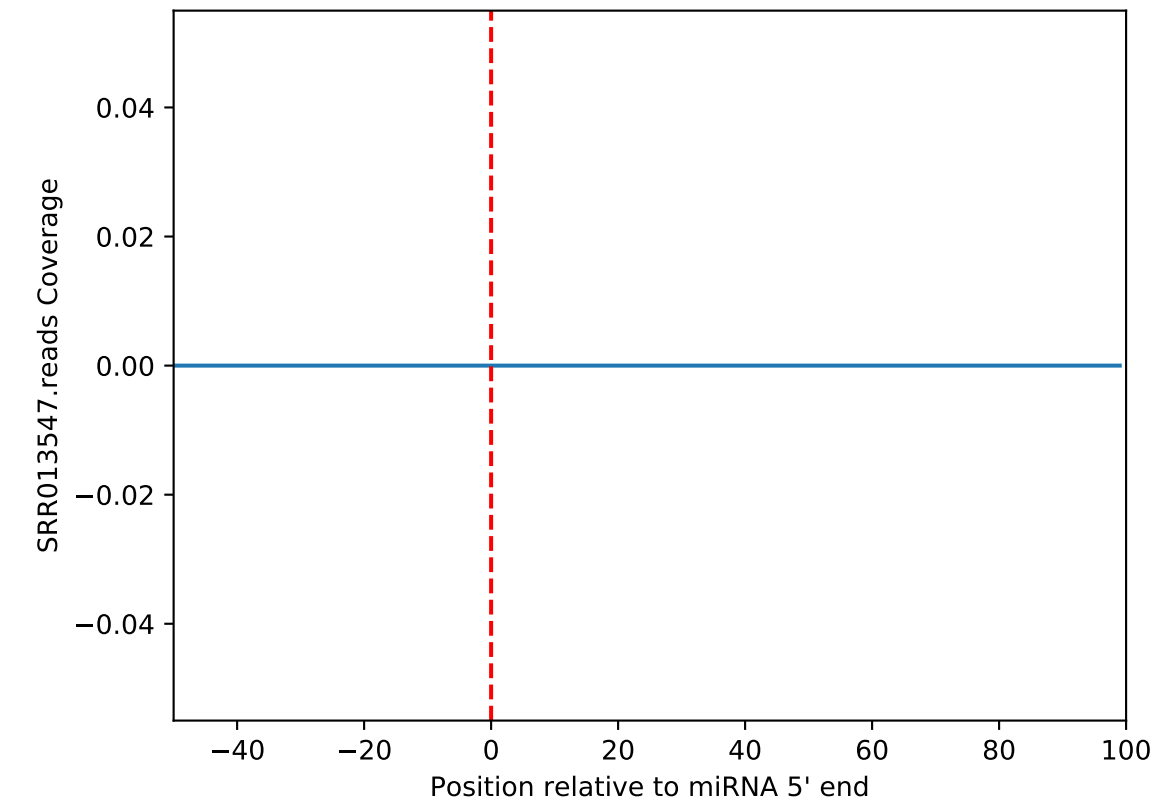

mir-1014 (chr3R:31753590(-))

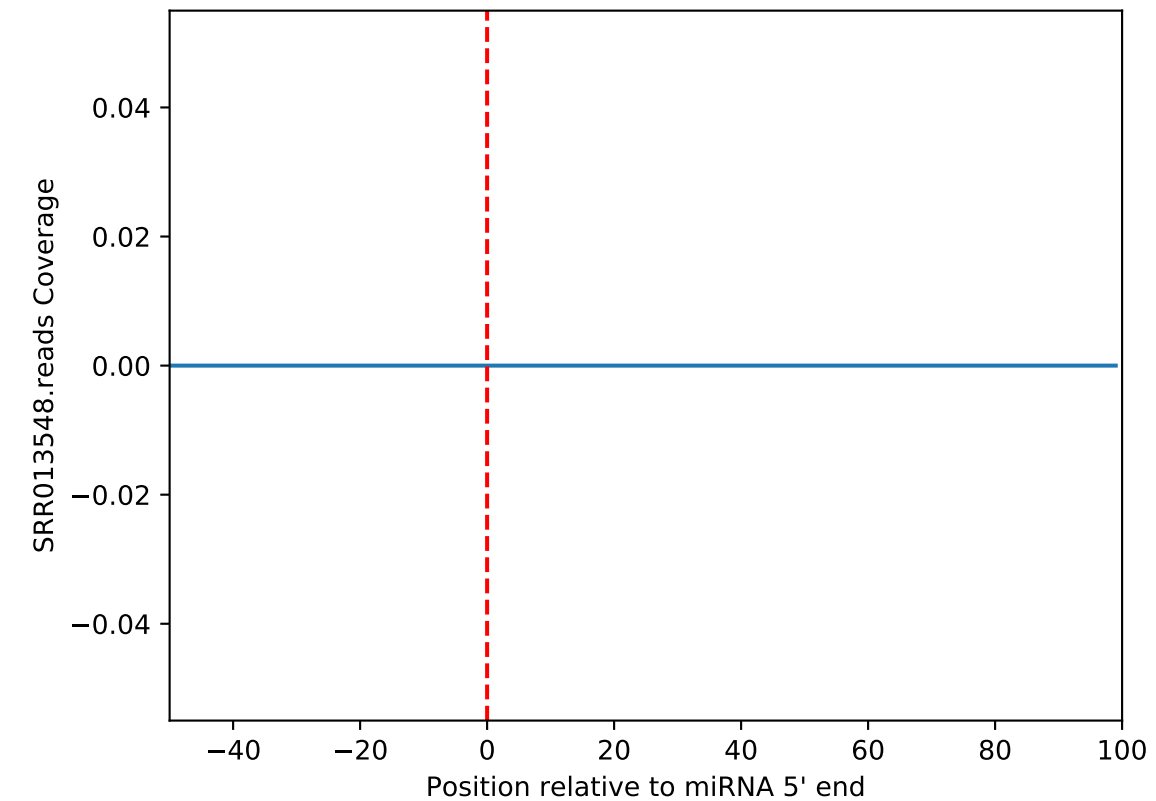

mir-4941 (chr3L:16031212(+))

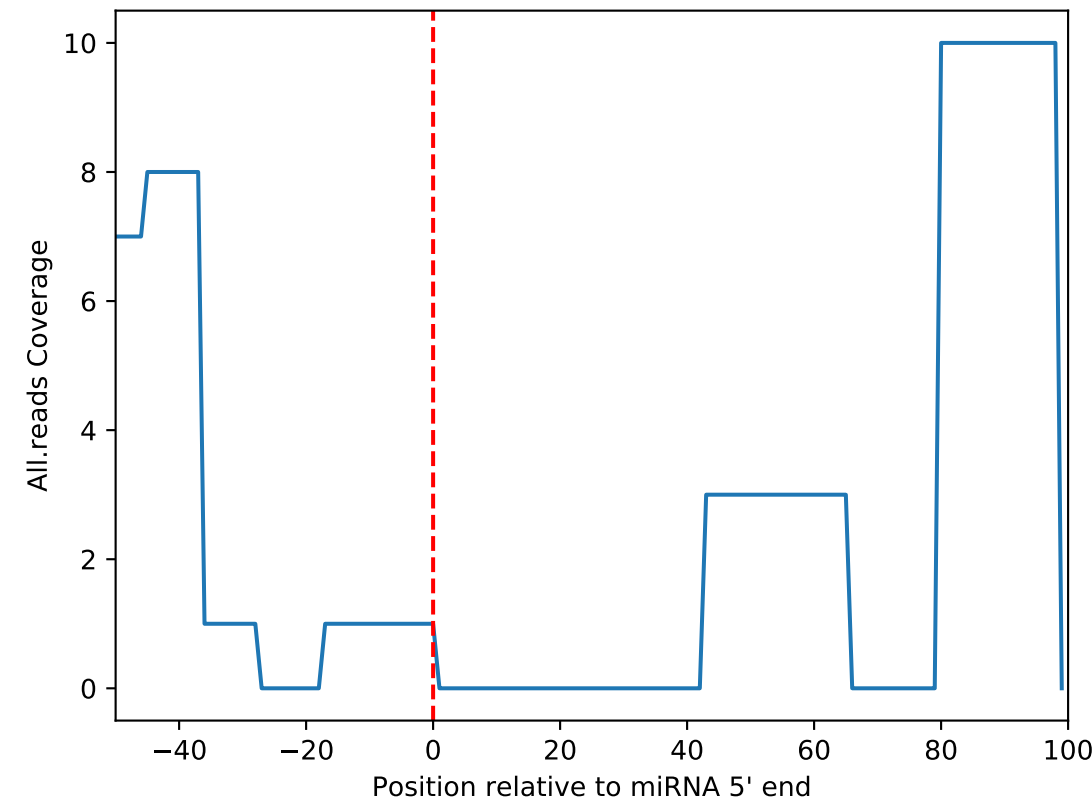

mir-4941 (chr3L:16031212(+))

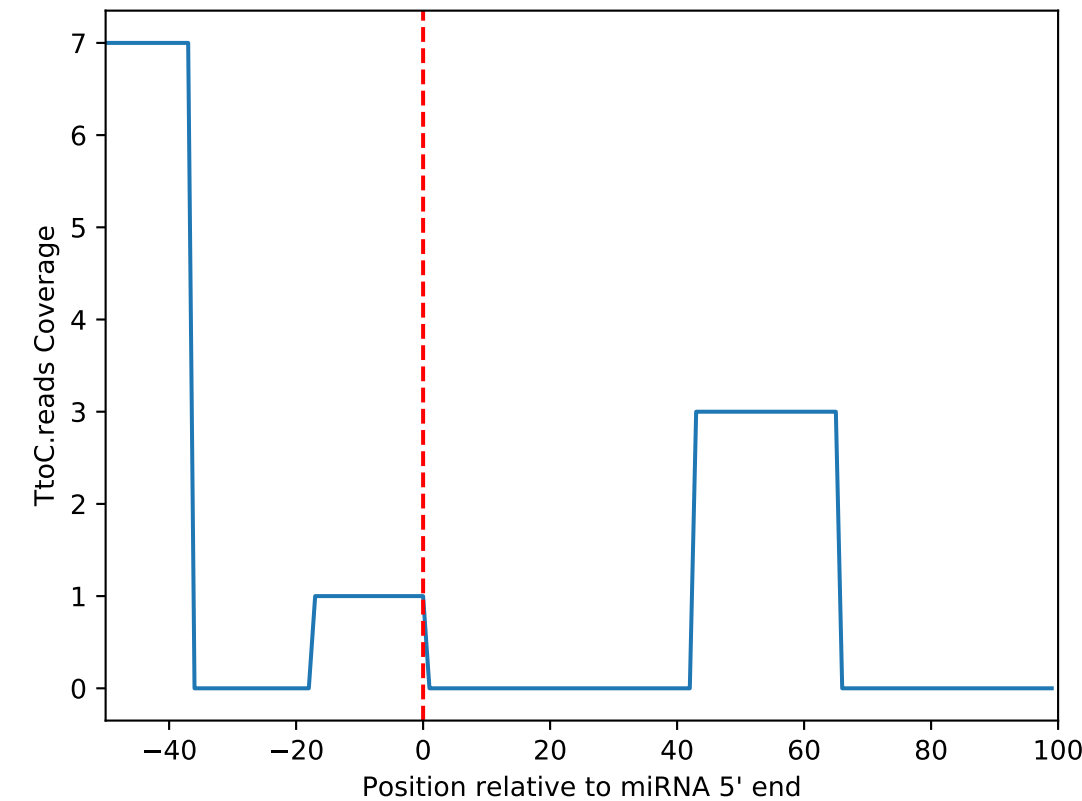

mir-4941 (chr3L:16031212(+))



mir-4941 (chr3L:16031212(+))



mir-2501 (chr3L:8111107(+))

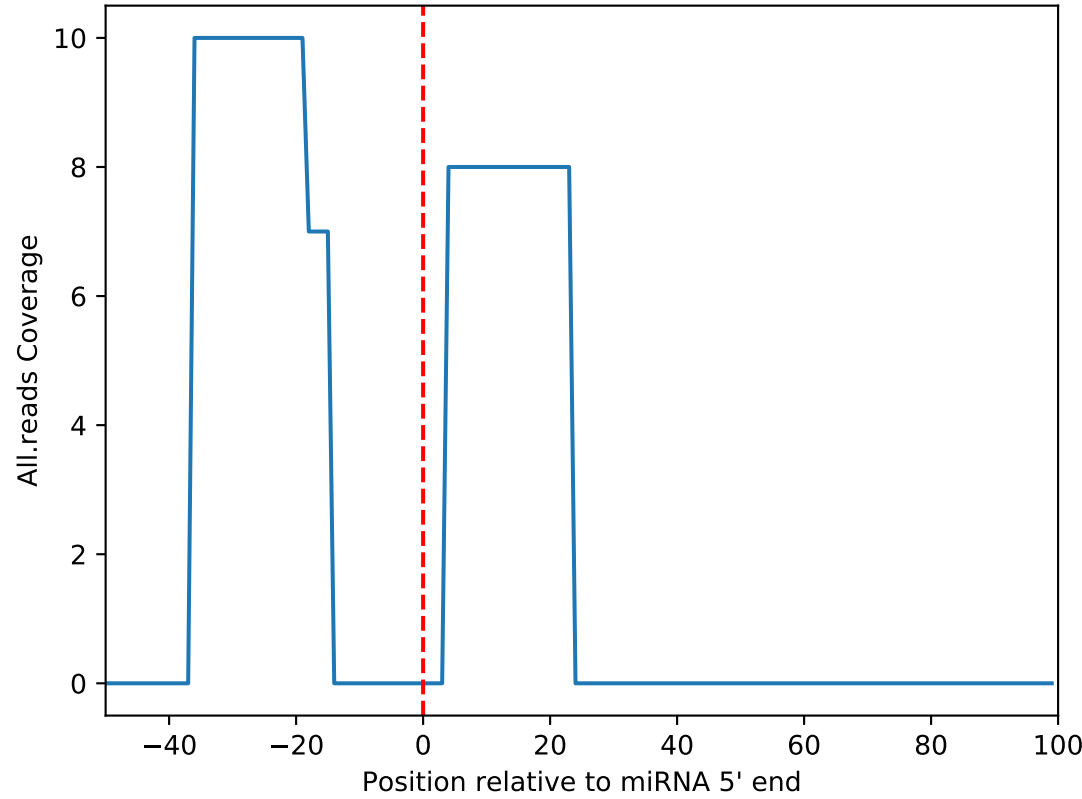

mir-2501 (chr3L:8111107(+))

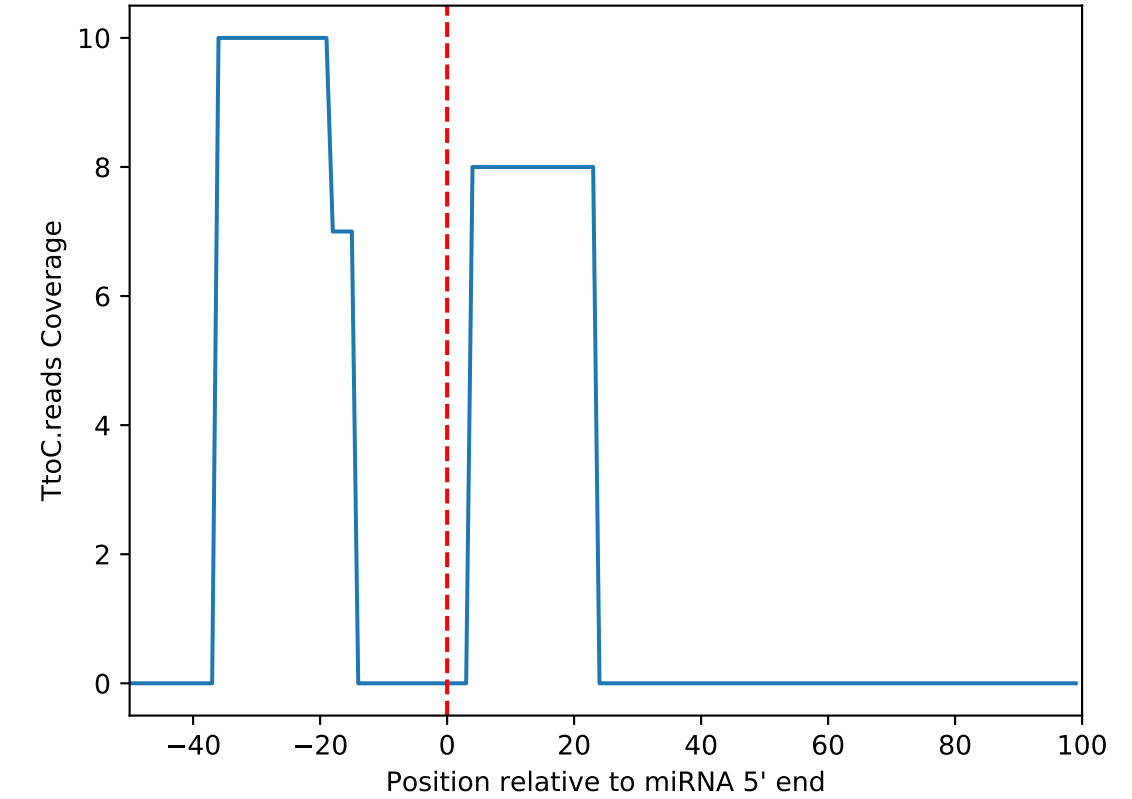

mir-2501 (chr3L:8111107(+))



mir-2501 (chr3L:8111107(+))

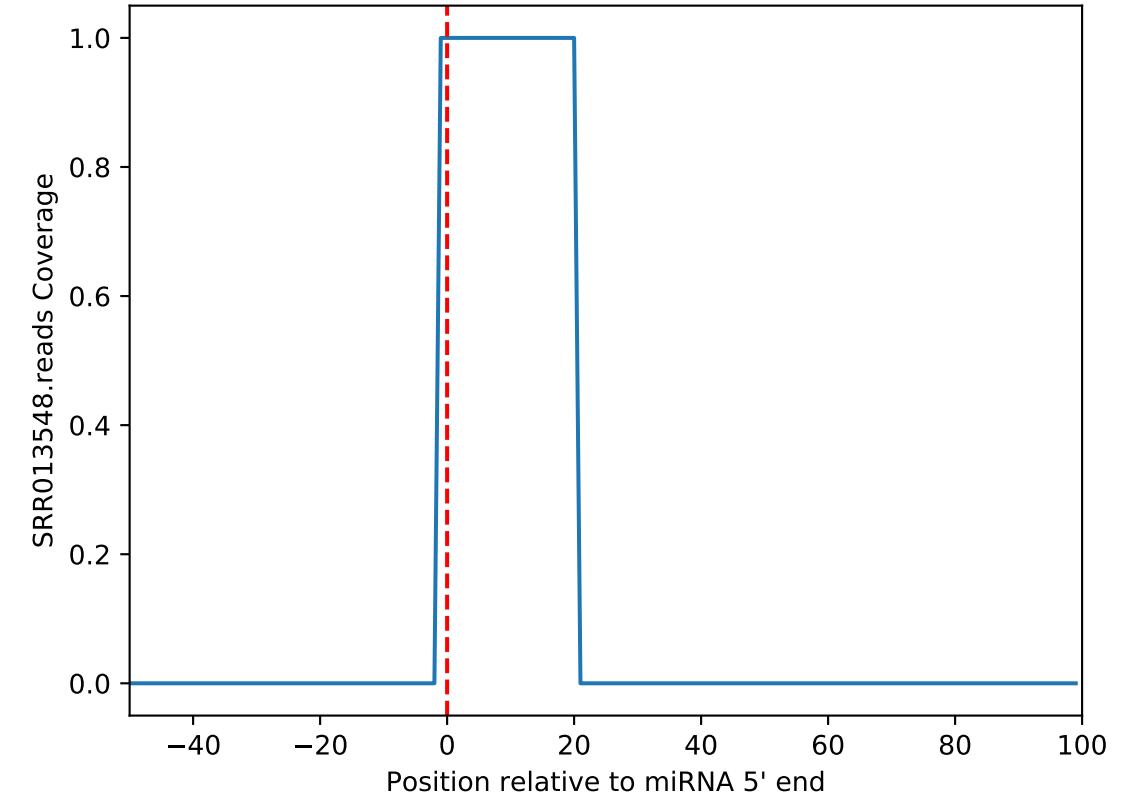

mir-3 (chr2R:19661656(-))

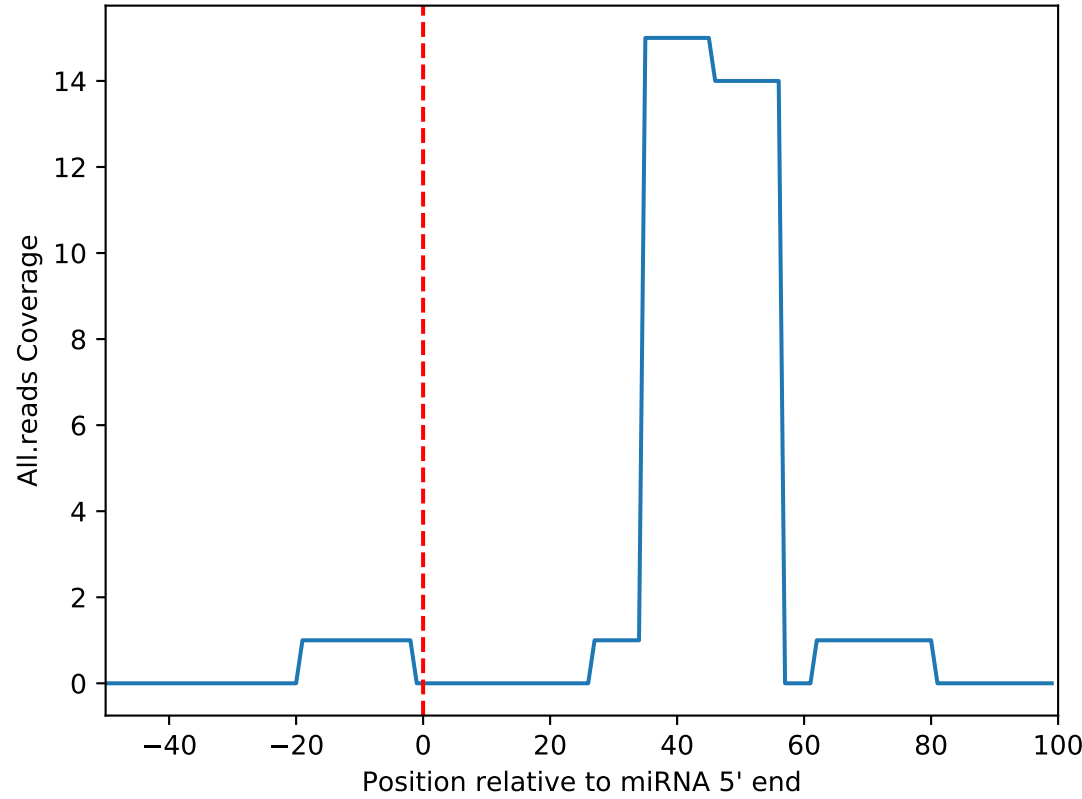

mir-3 (chr2R:19661656(-))



mir-3 (chr2R:19661656(-))

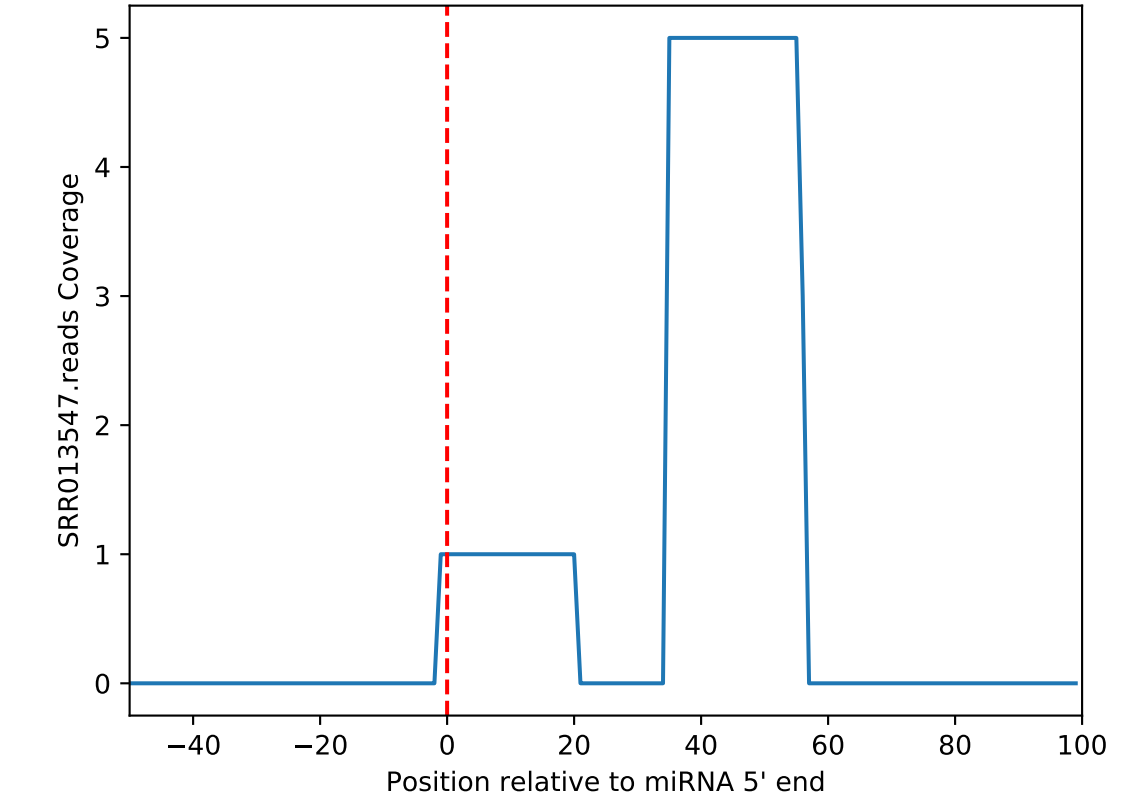

mir-3 (chr2R:19661656(-))

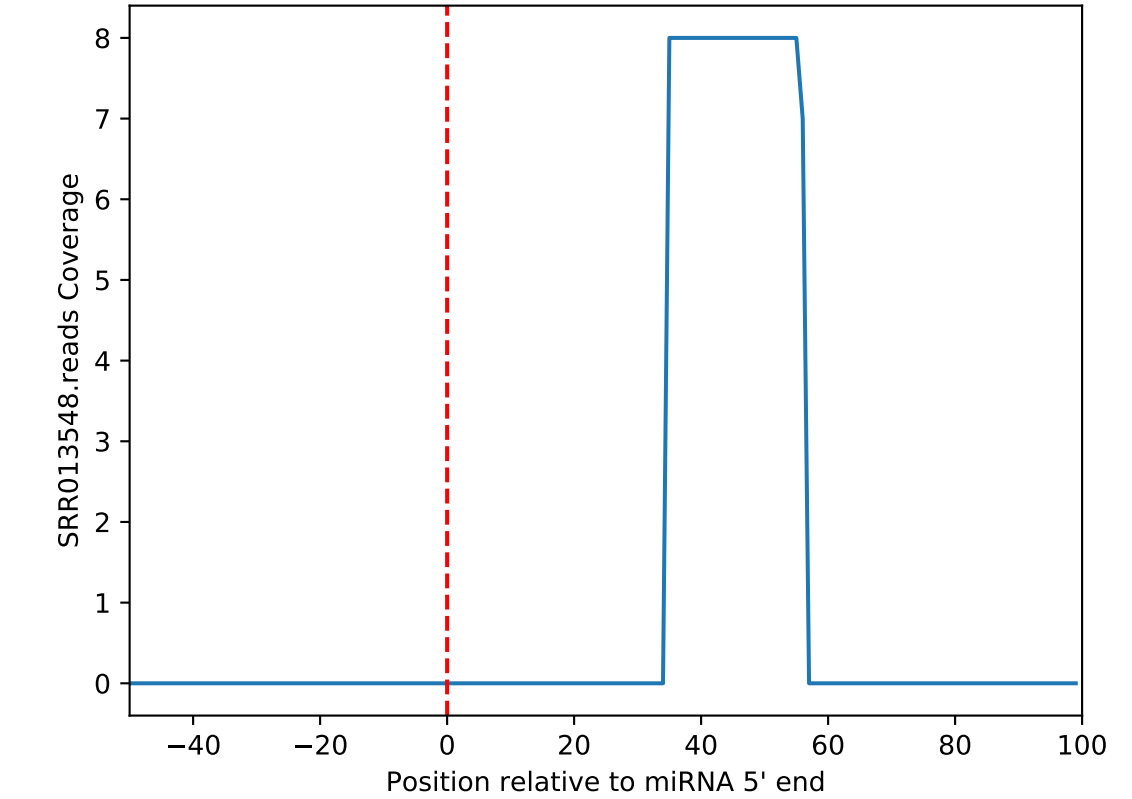

mir-993 (chr3R:6776348(+))

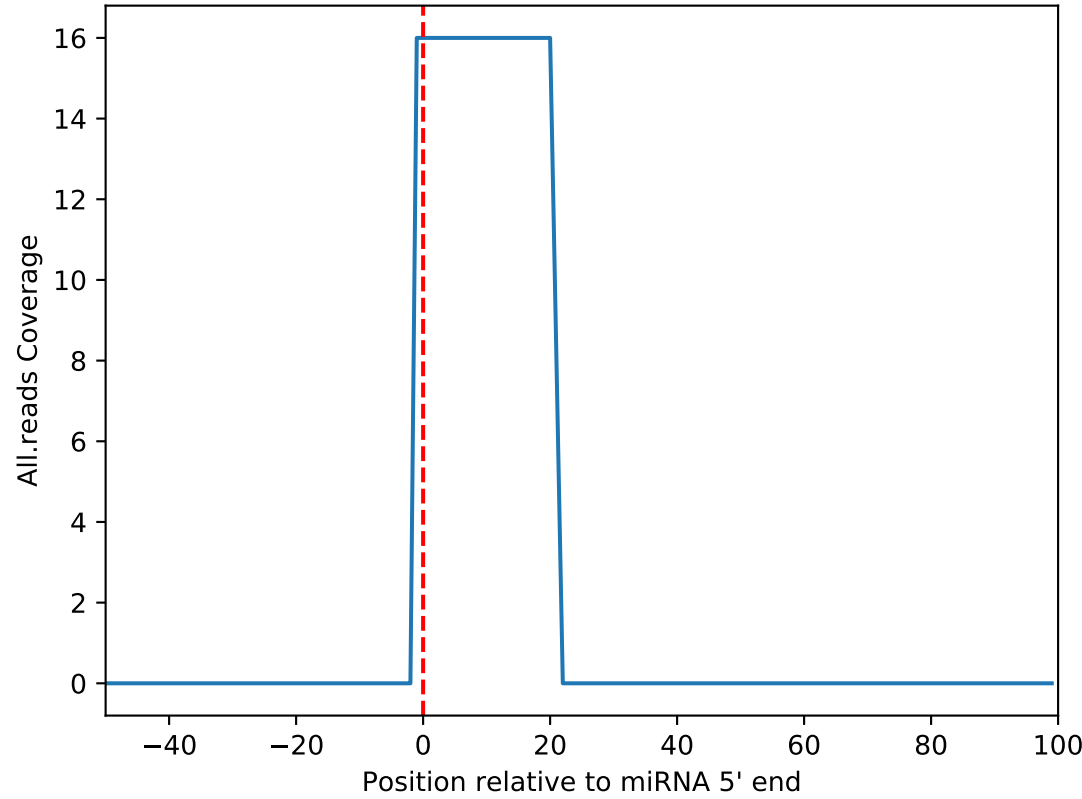

mir-993 (chr3R:6776348(+))



mir-993 (chr3R:6776348(+))



mir-993 (chr3R:6776348(+))



mir-4956 (chrX:7085824(-))

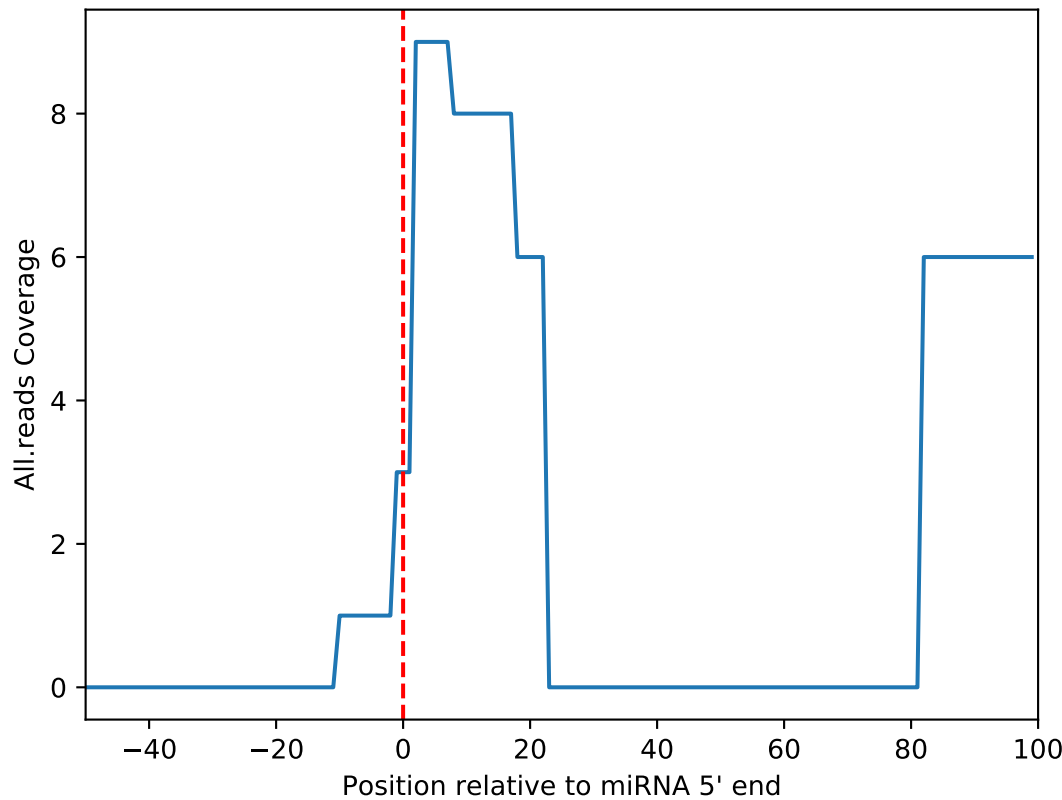

mir-4956 (chrX:7085824(-))

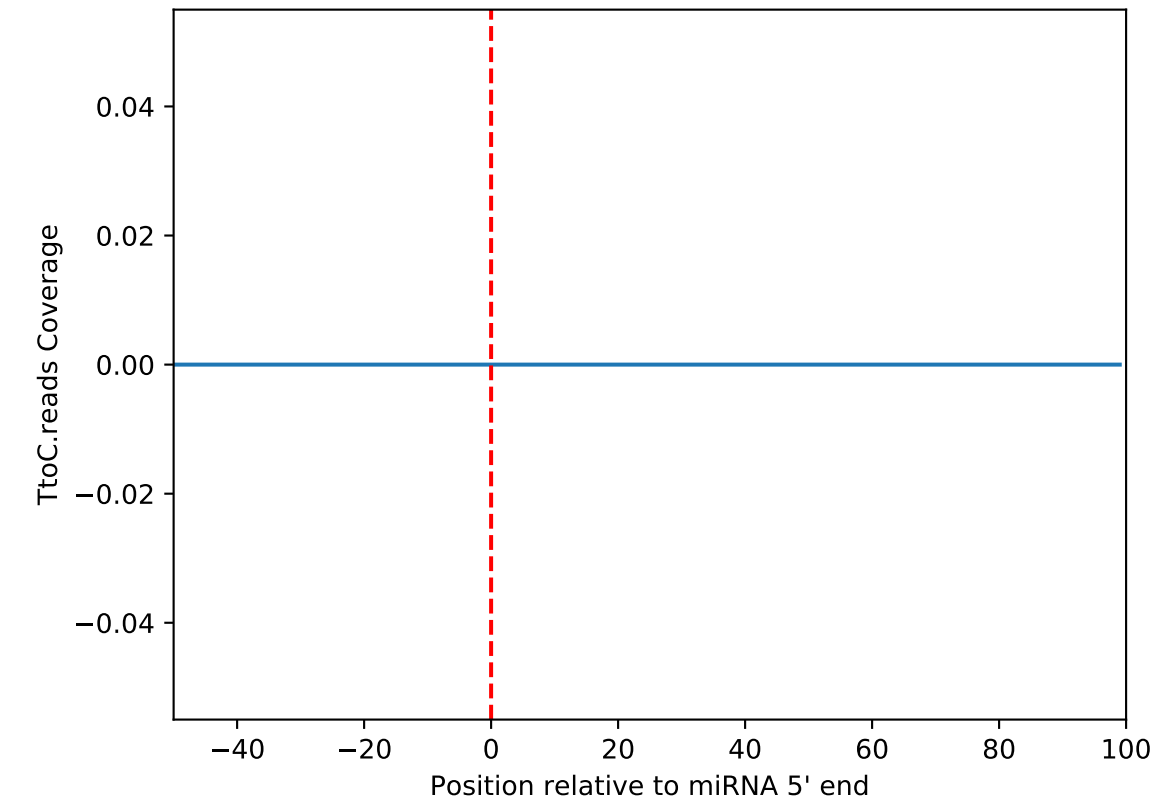

mir-4956 (chrX:7085824(-))

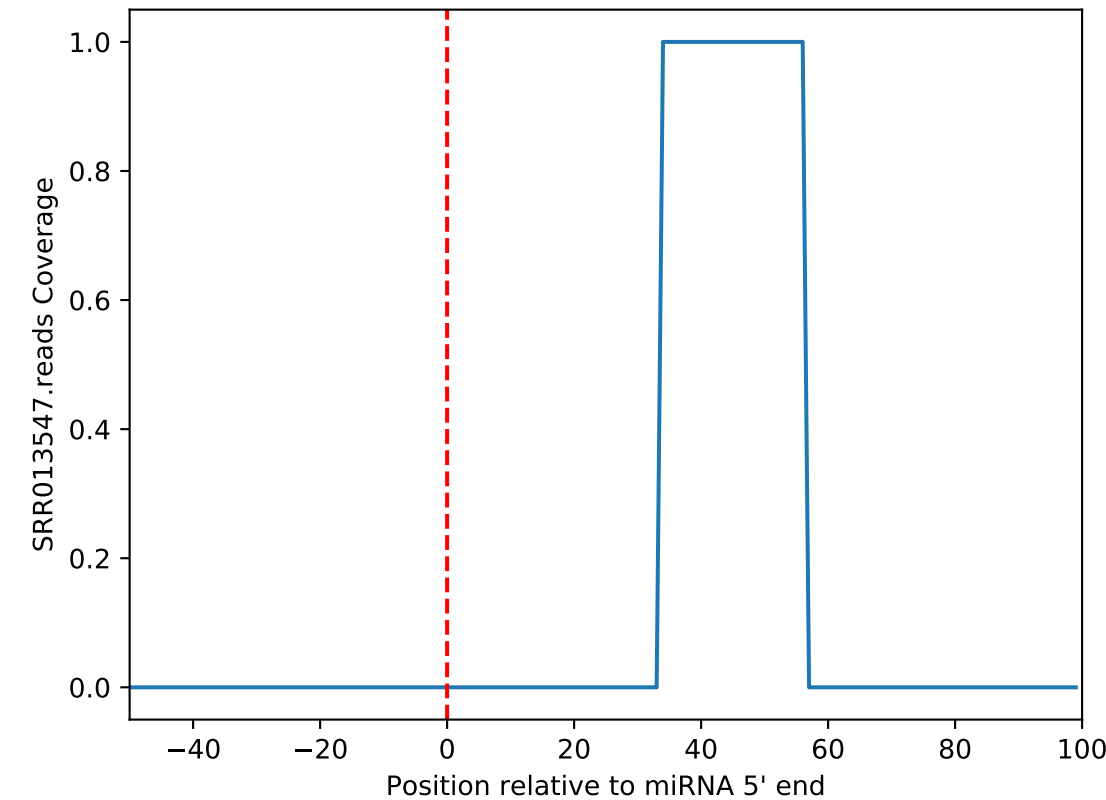

mir-4956 (chrX:7085824(-))

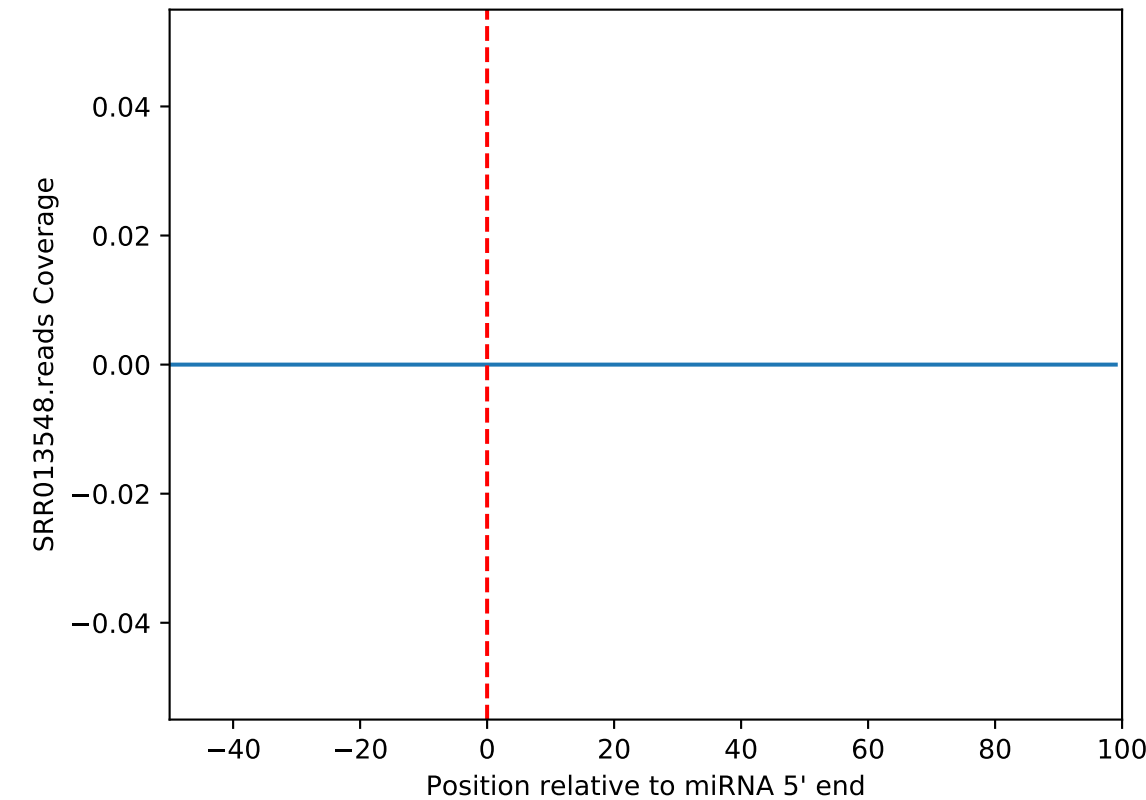

mir-956 (chr3L:11773868(-))

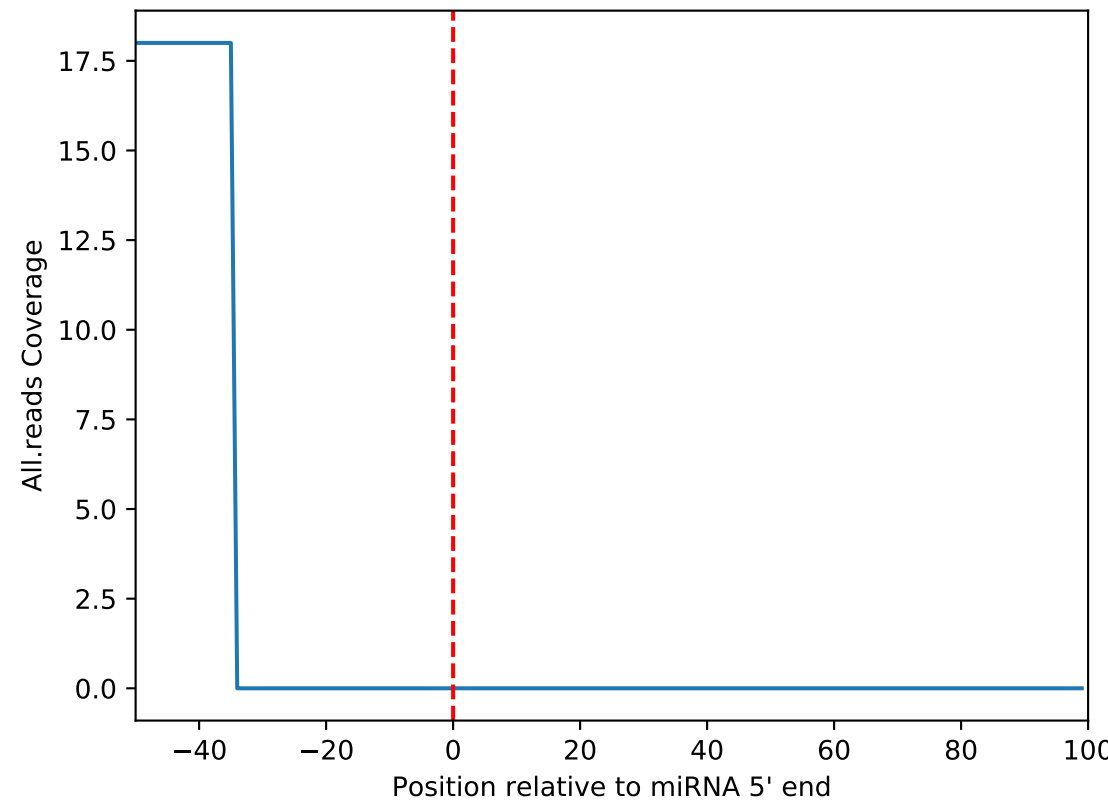

mir-956 (chr3L:11773868(-))



mir-956 (chr3L:11773868(-))



mir-956 (chr3L:11773868(-))

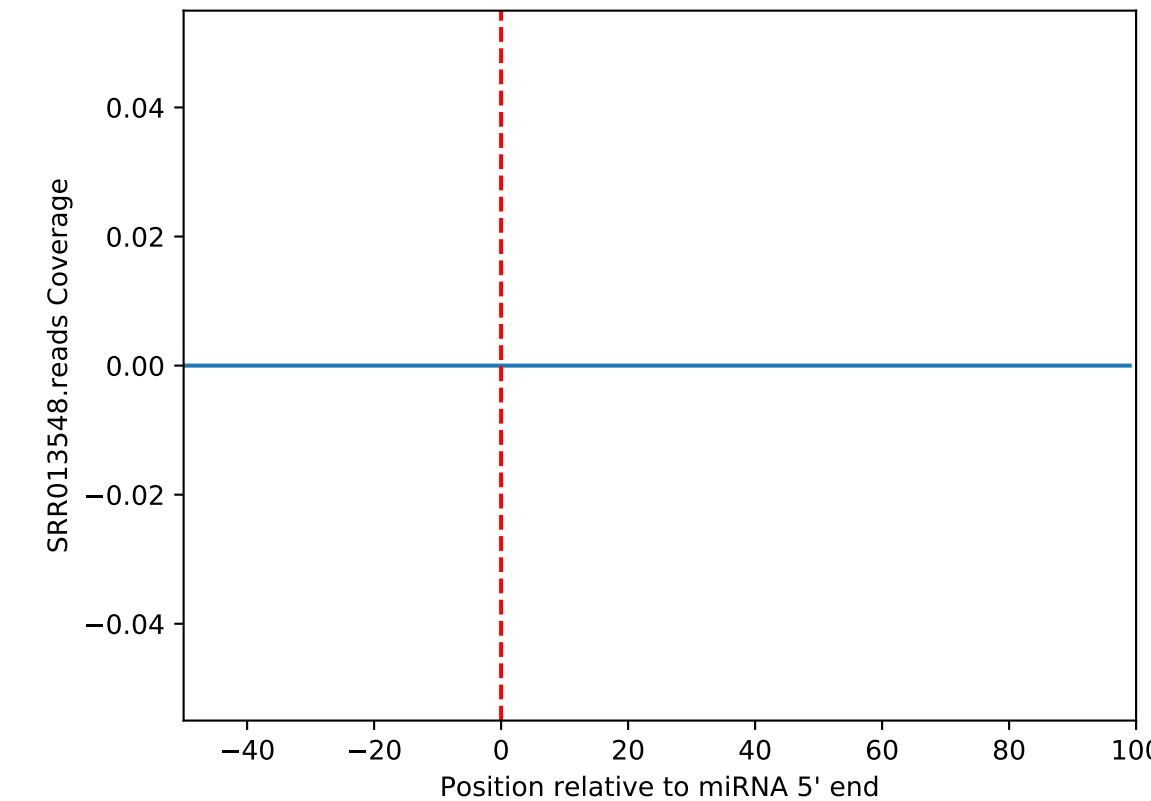



mir-987 (chr2R:9313102(-))

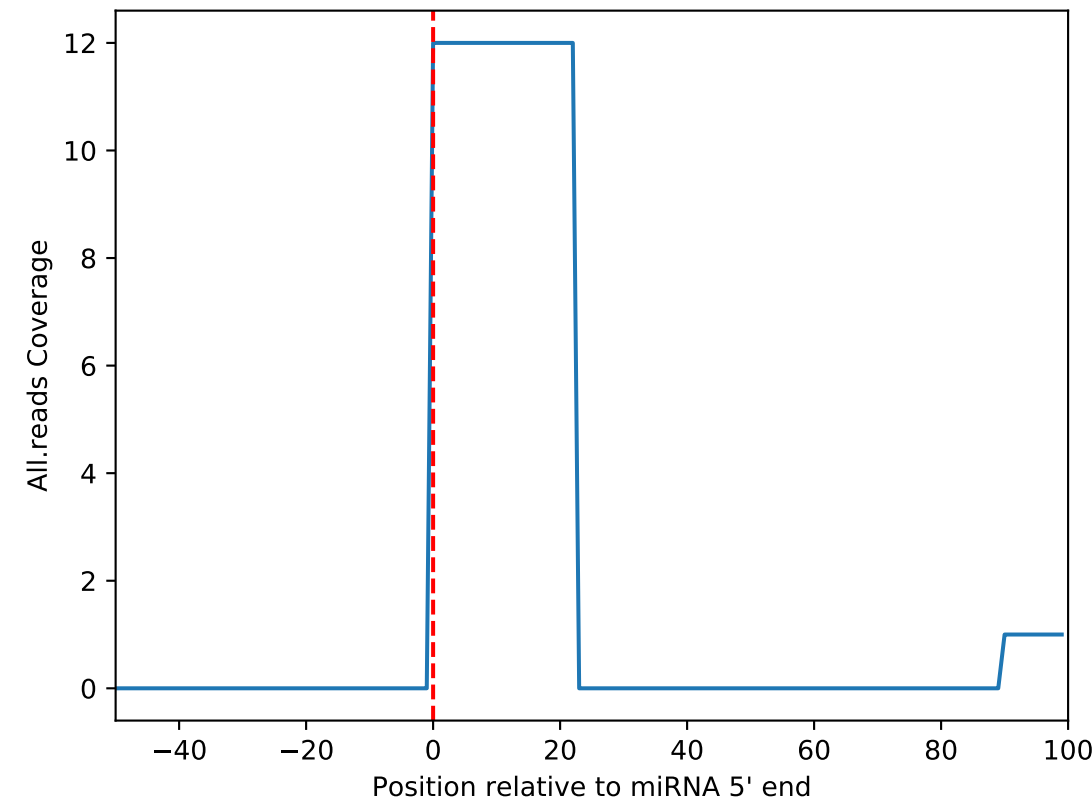

mir-987 (chr2R:9313102(-))



mir-987 (chr2R:9313102(-))

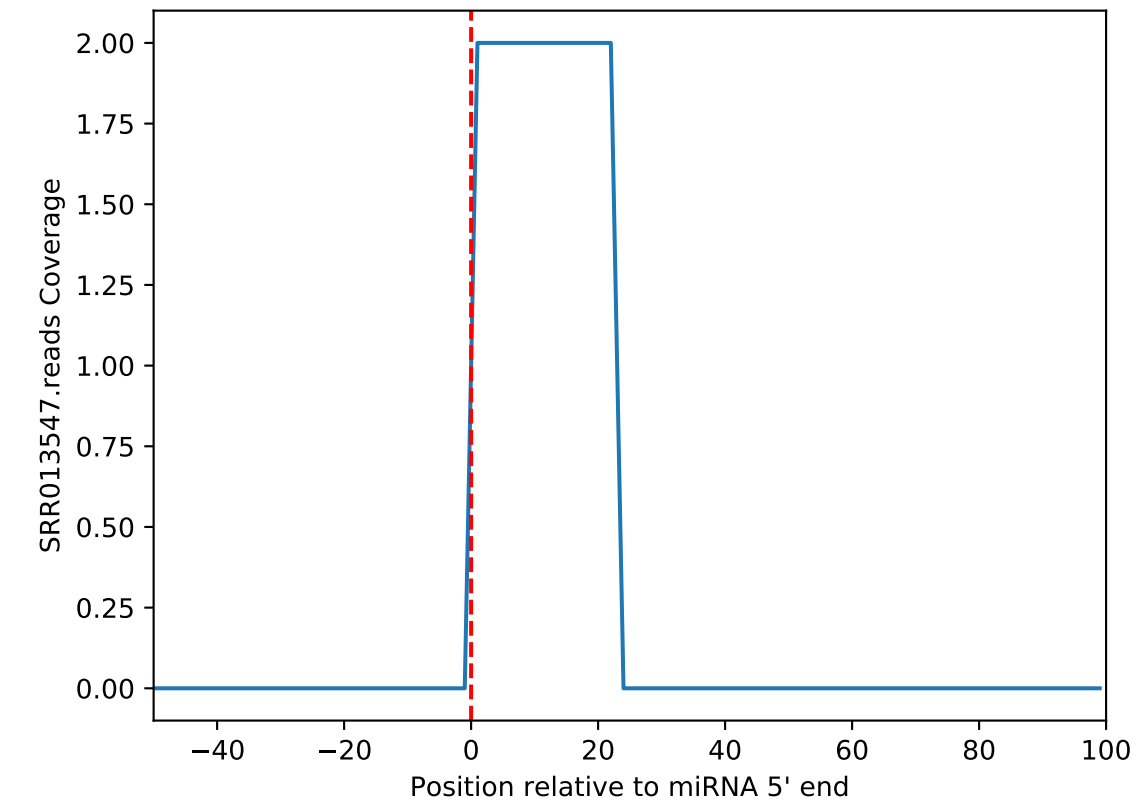

mir-987 (chr2R:9313102(-))

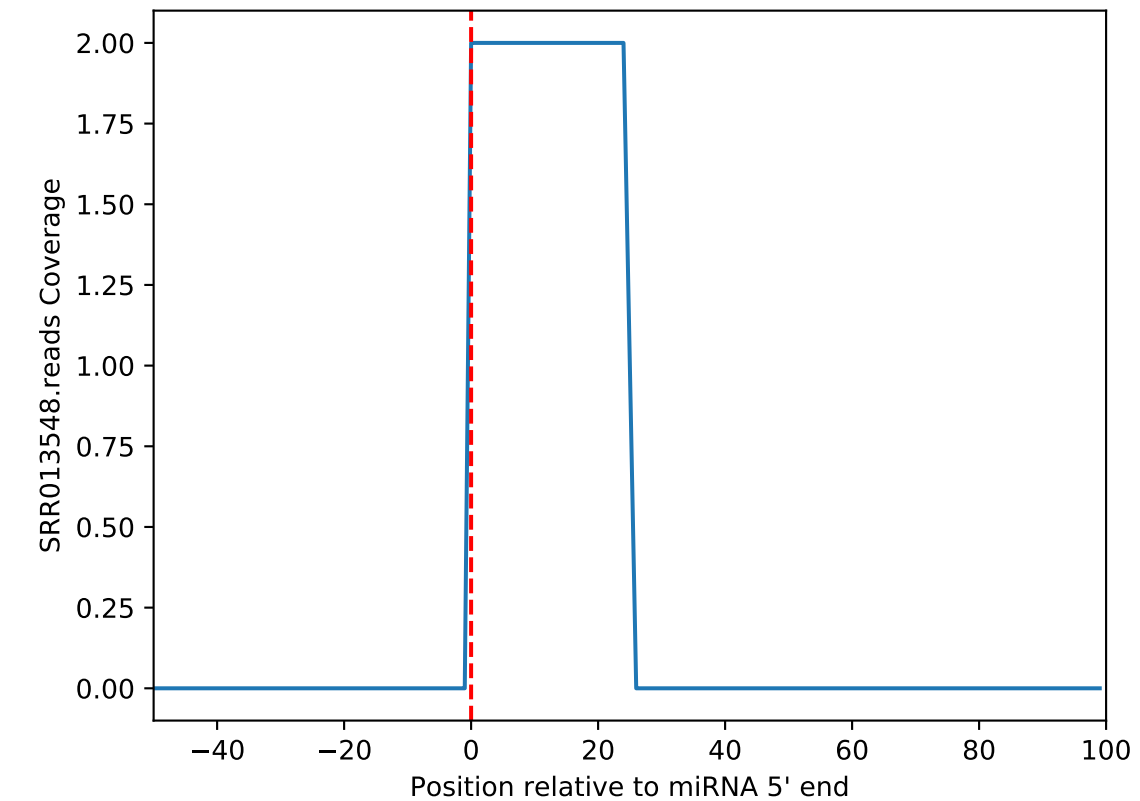

mir-9385 (chr4:400765(-))

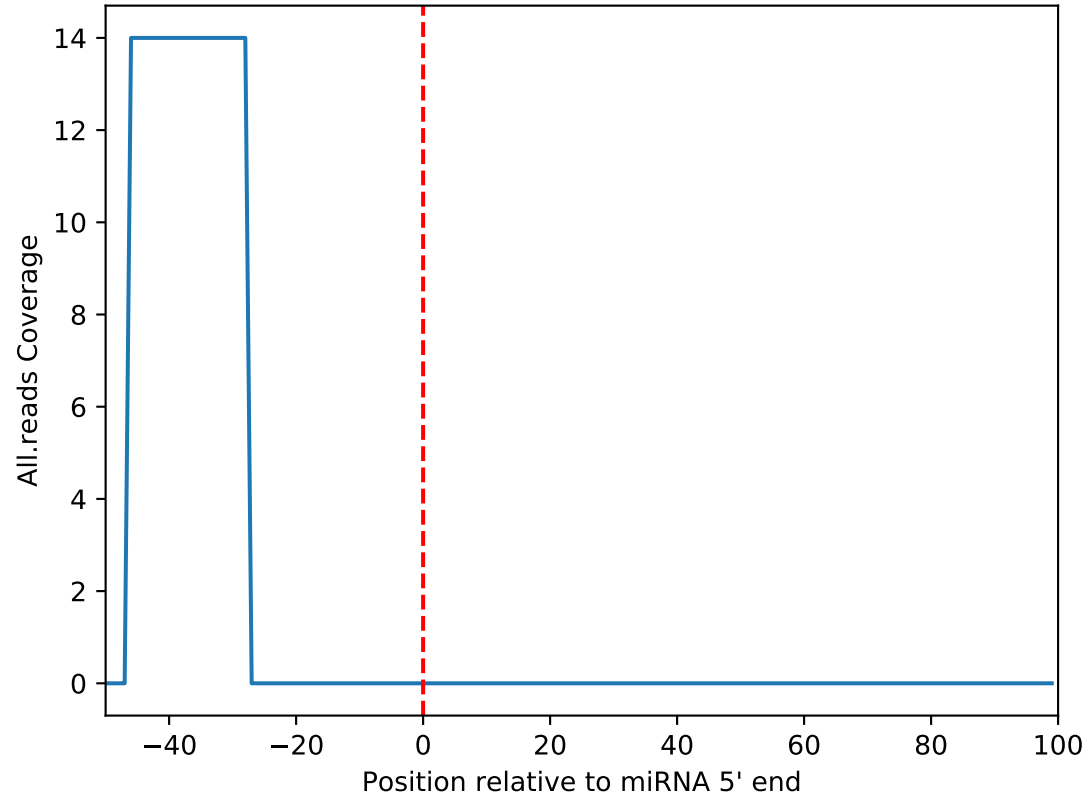

mir-9385 (chr4:400765(-))

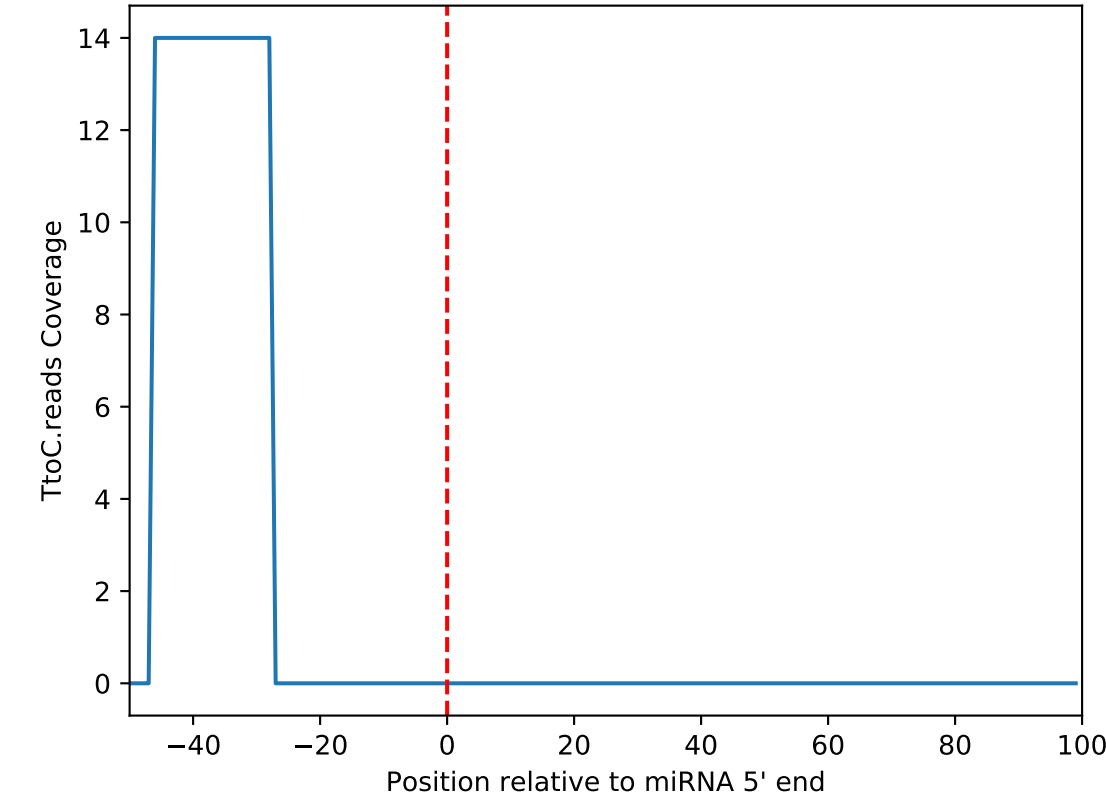

mir-9385 (chr4:400765(-))

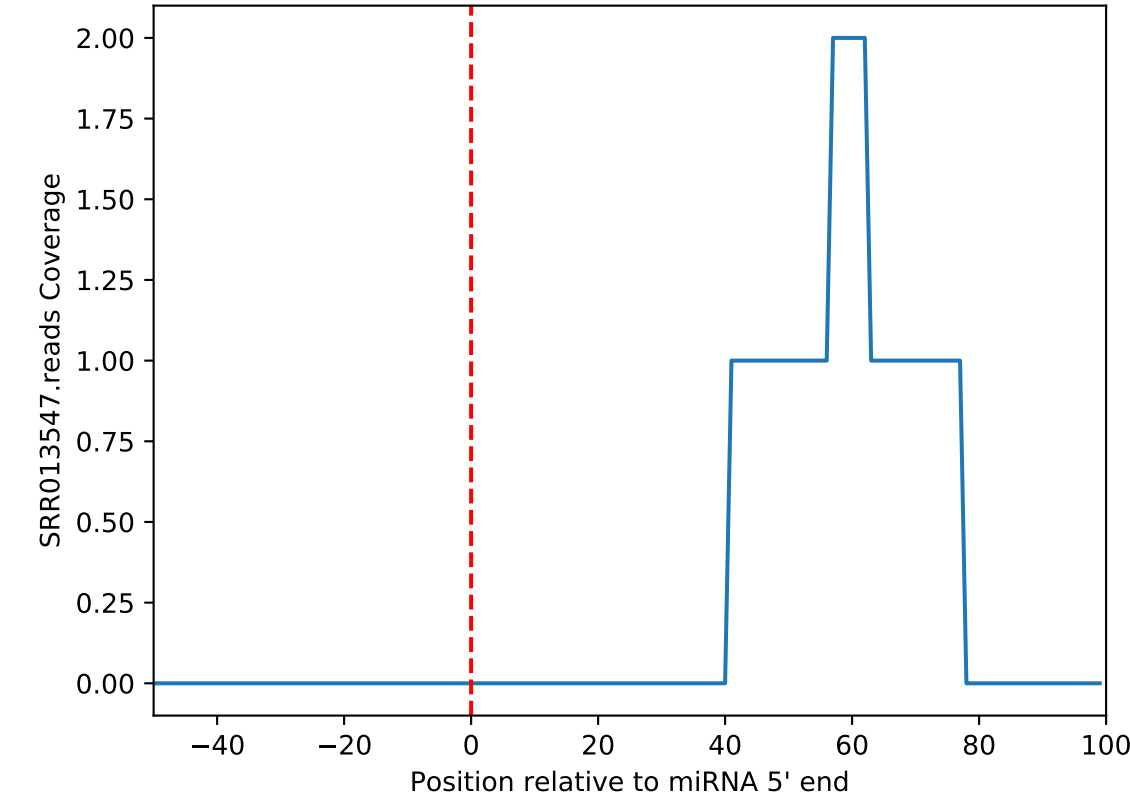

mir-9385 (chr4:400765(-))

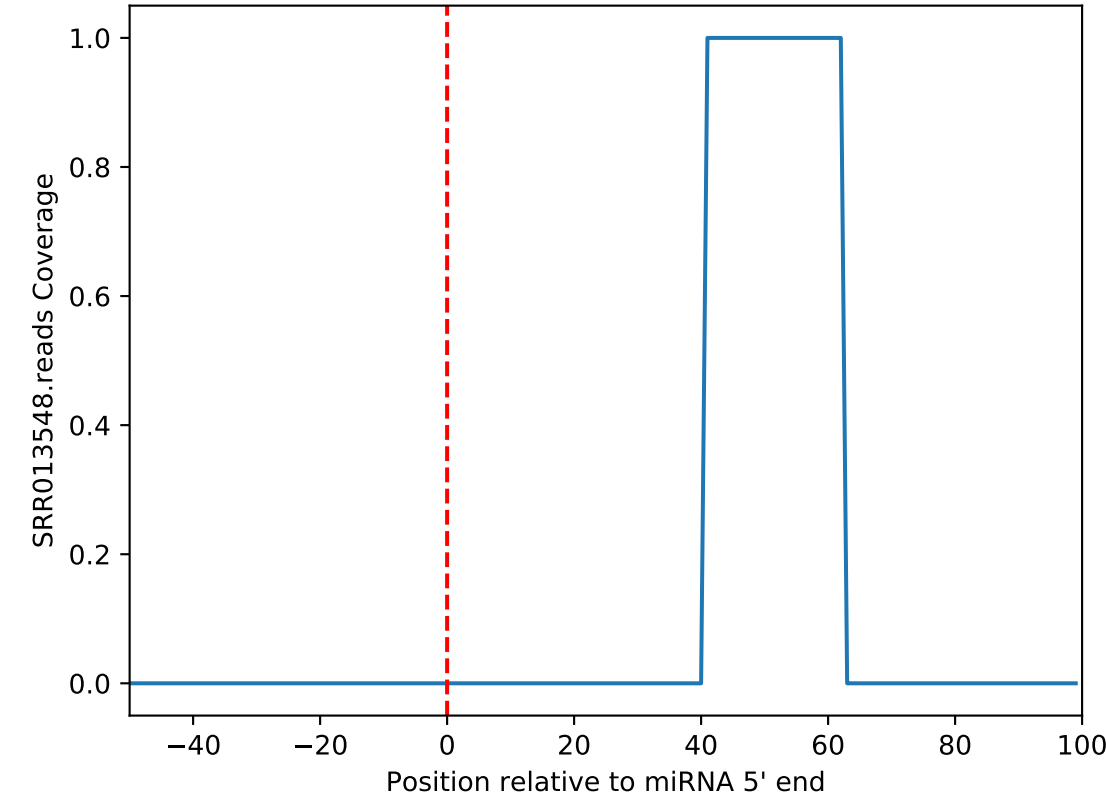

mir-9377 (chrX:12665217(+))

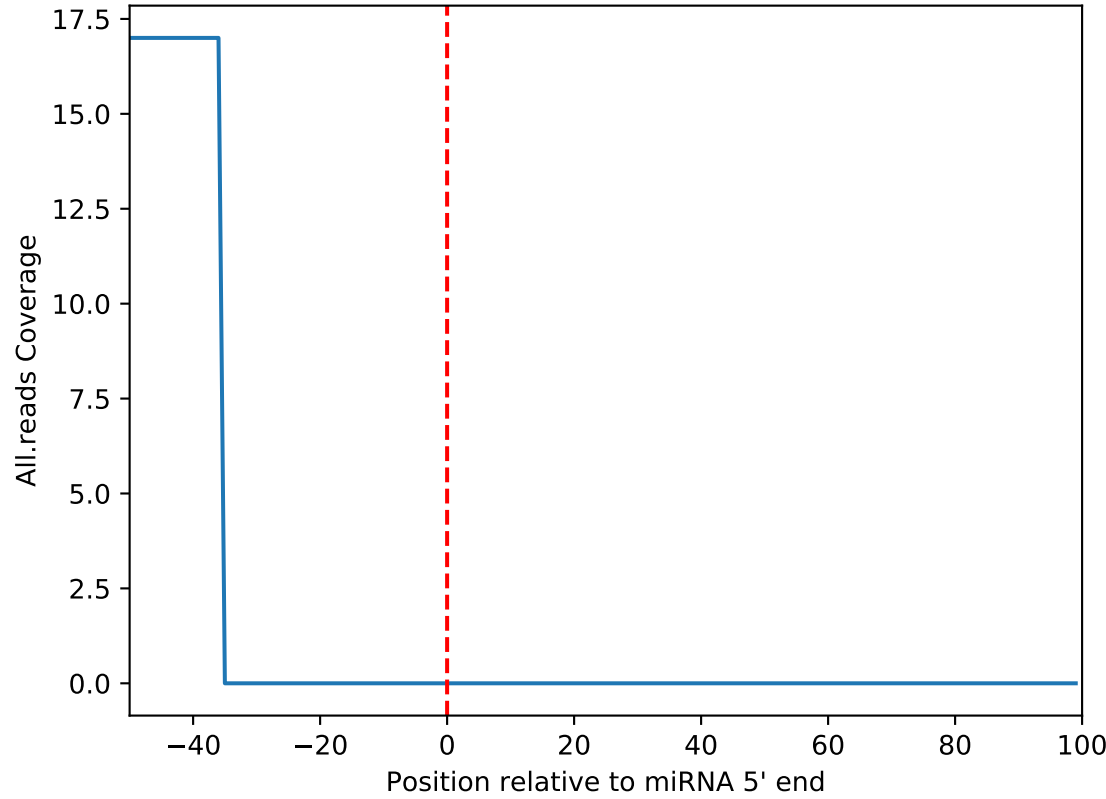

mir-9377 (chrX:12665217(+))



mir-9377 (chrX:12665217(+))



mir-9377 (chrX:12665217(+))



mir-87 (chr2L:9950504(-))

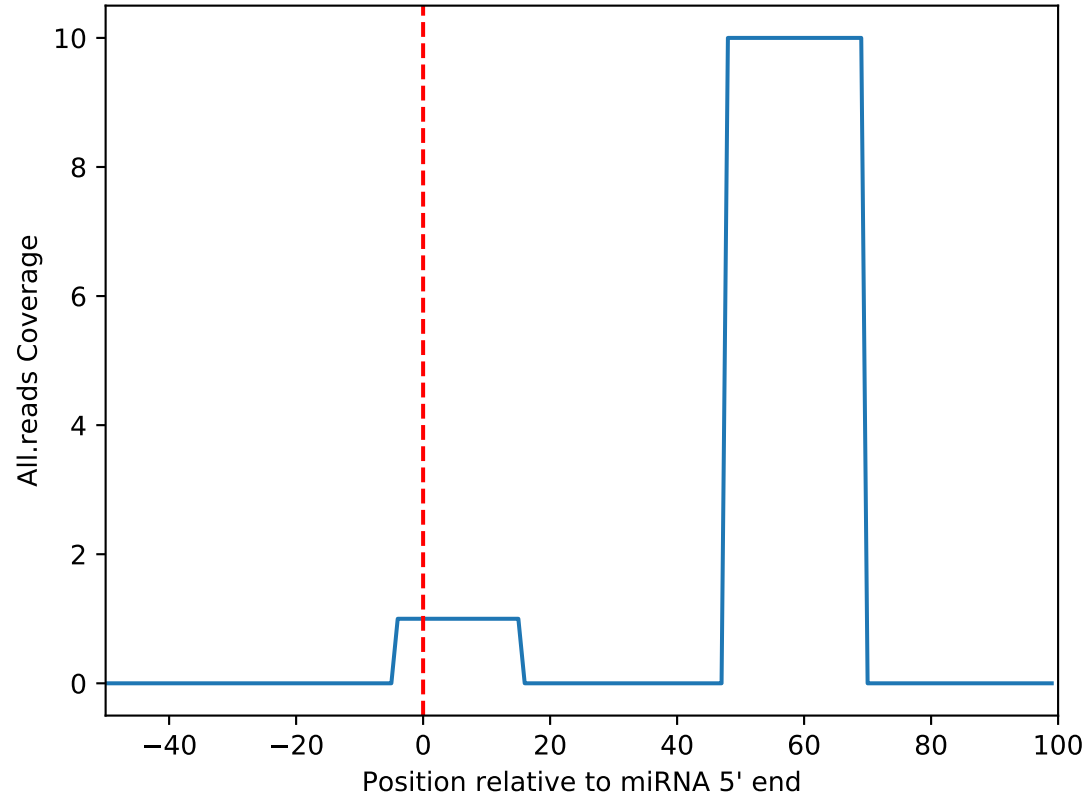

mir-87 (chr2L:9950504(-))



mir-87 (chr2L:9950504(-))



mir-87 (chr2L:9950504(-))



mir-957 (chr3L:22518277(-))

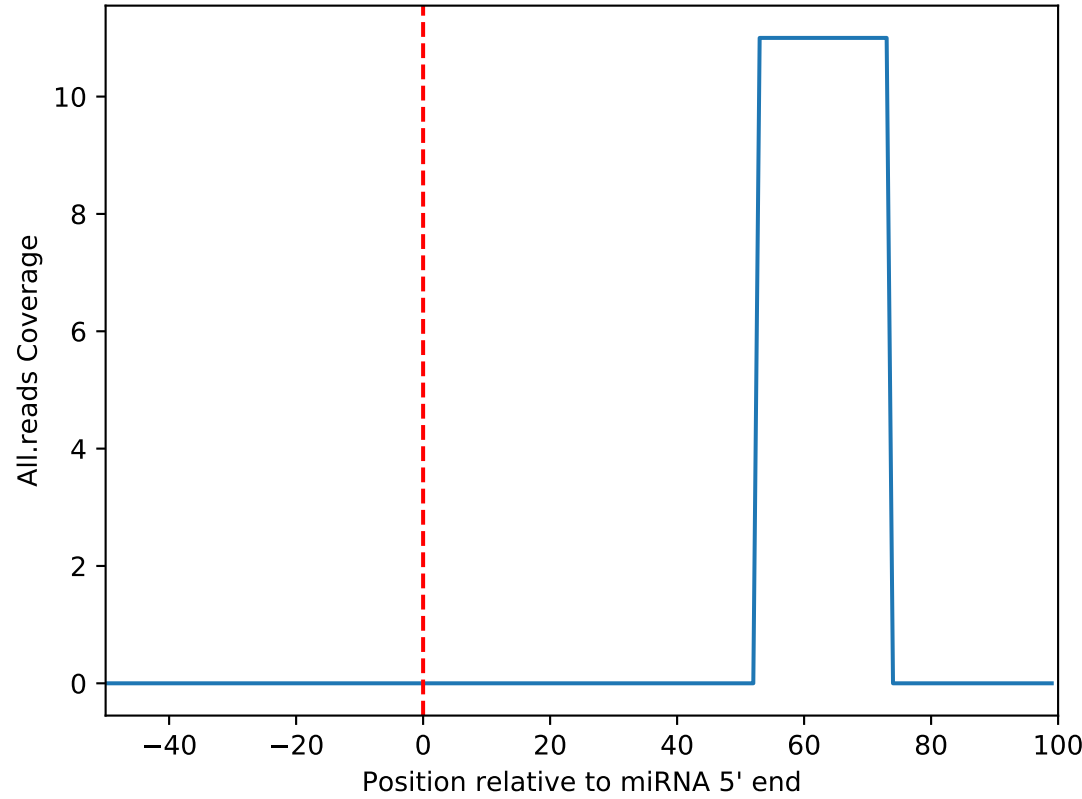

mir-957 (chr3L:22518277(-))

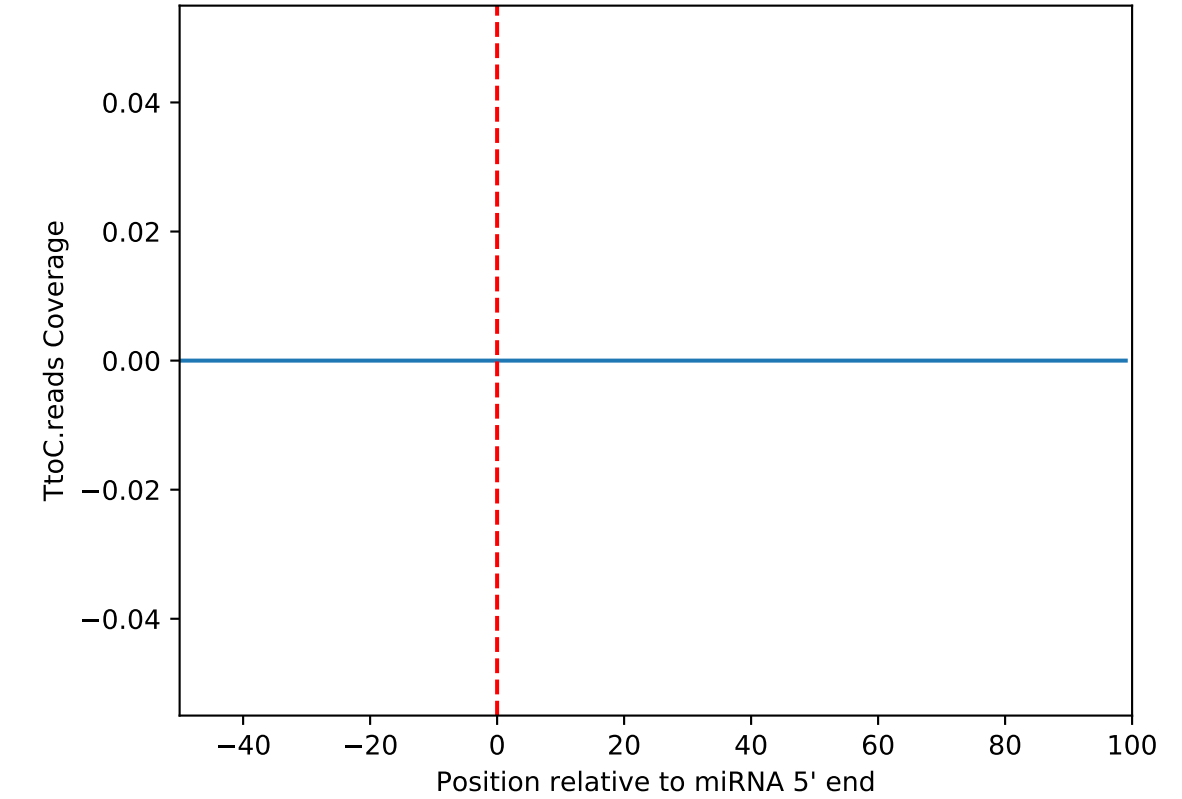

mir-957 (chr3L:22518277(-))

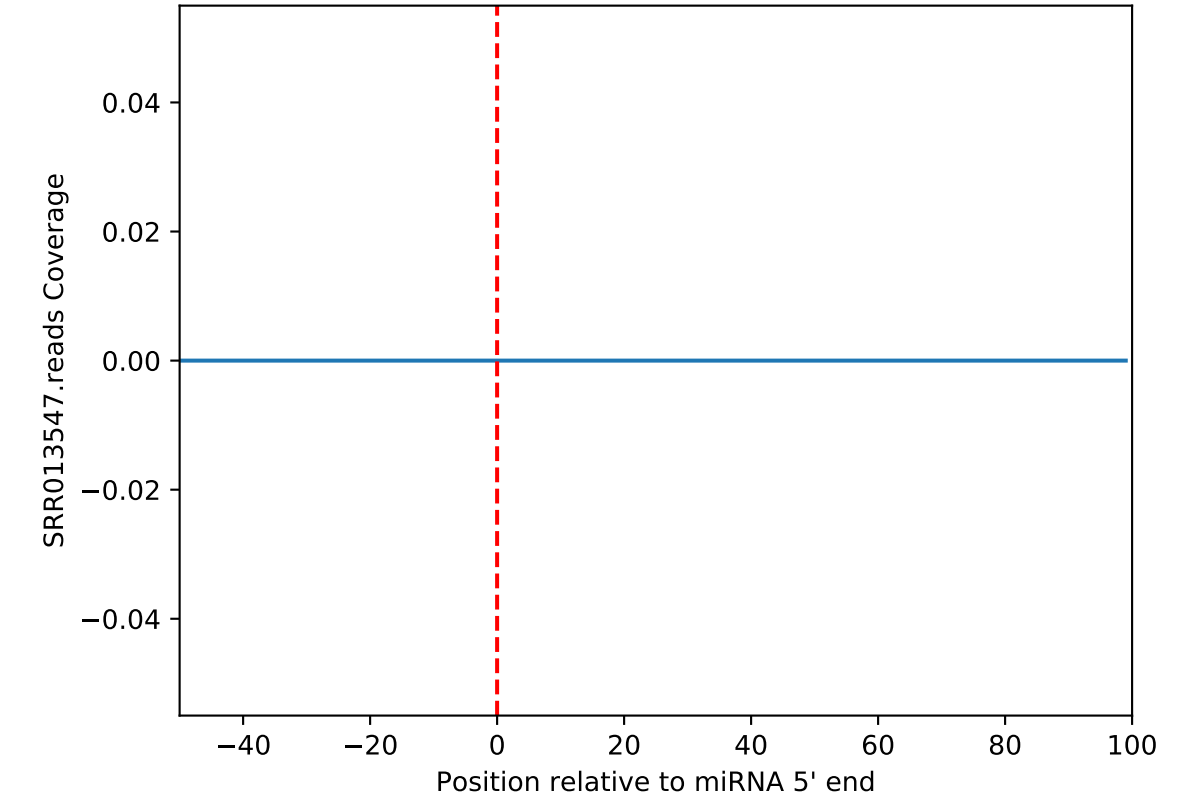

mir-957 (chr3L:22518277(-))

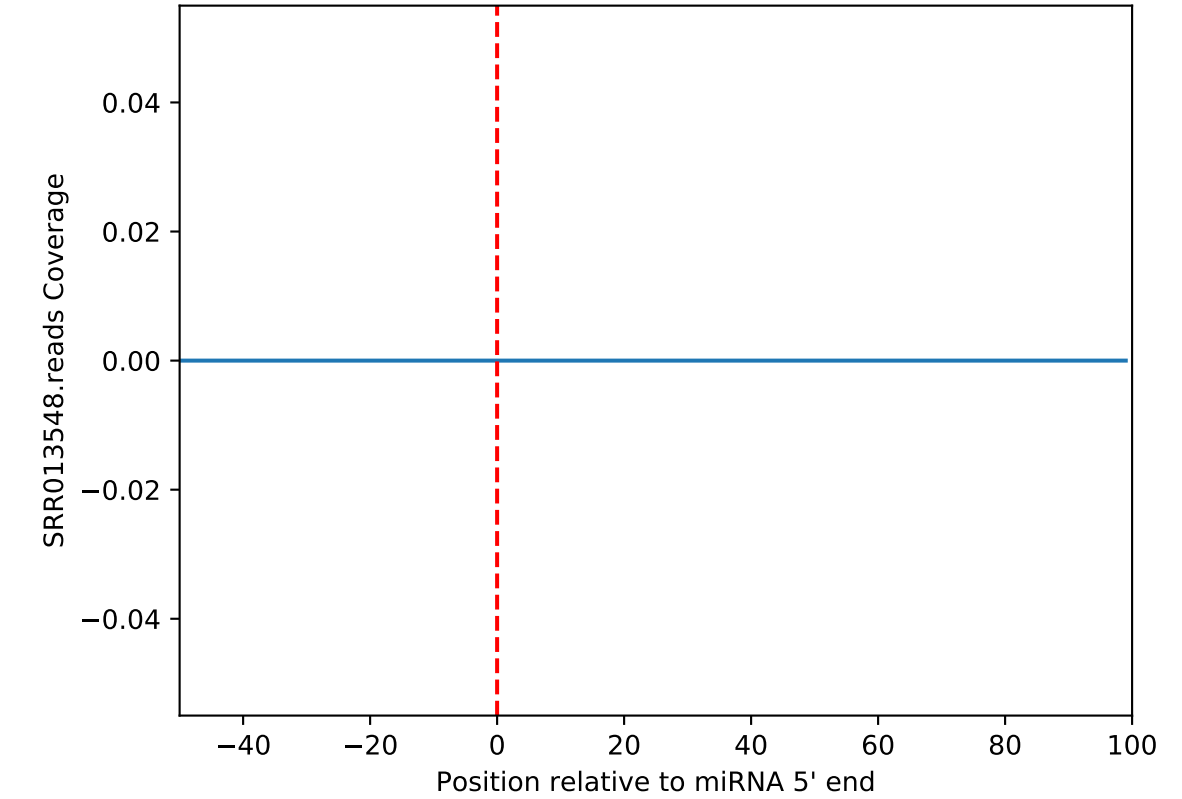

mir-2496 (chrX:2010310(+))

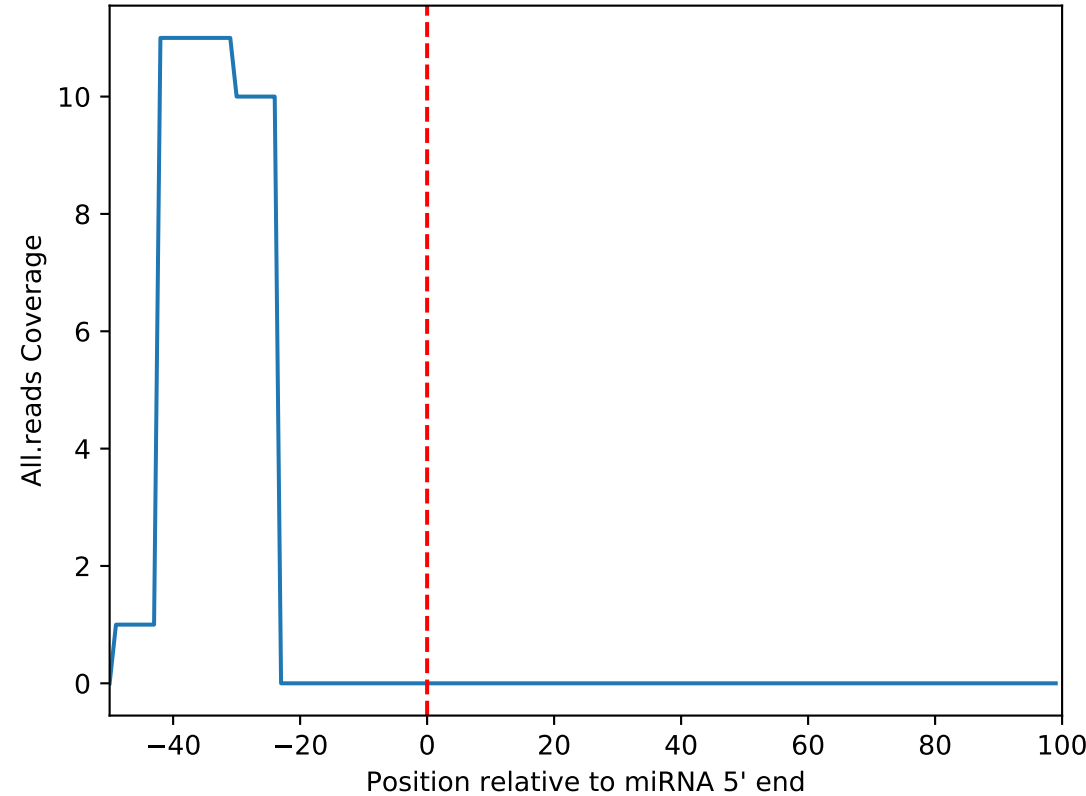

mir-2496 (chrX:2010310(+))

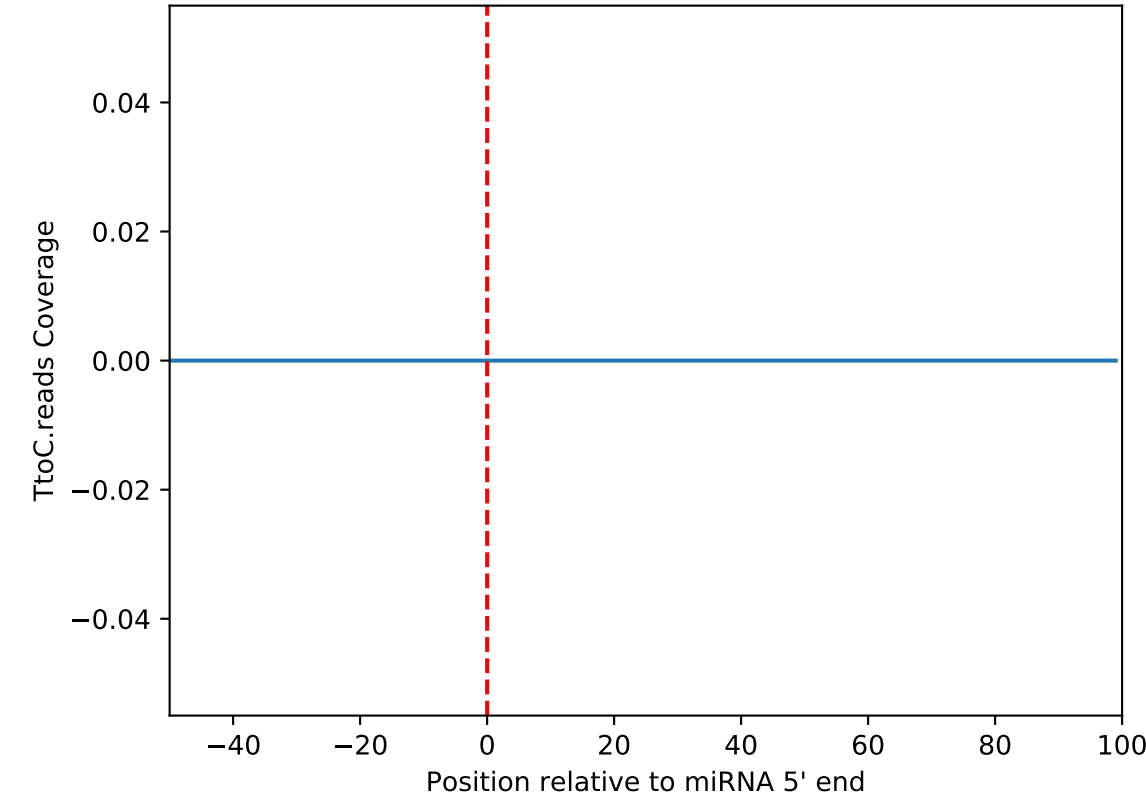

mir-2496 (chrX:2010310(+))

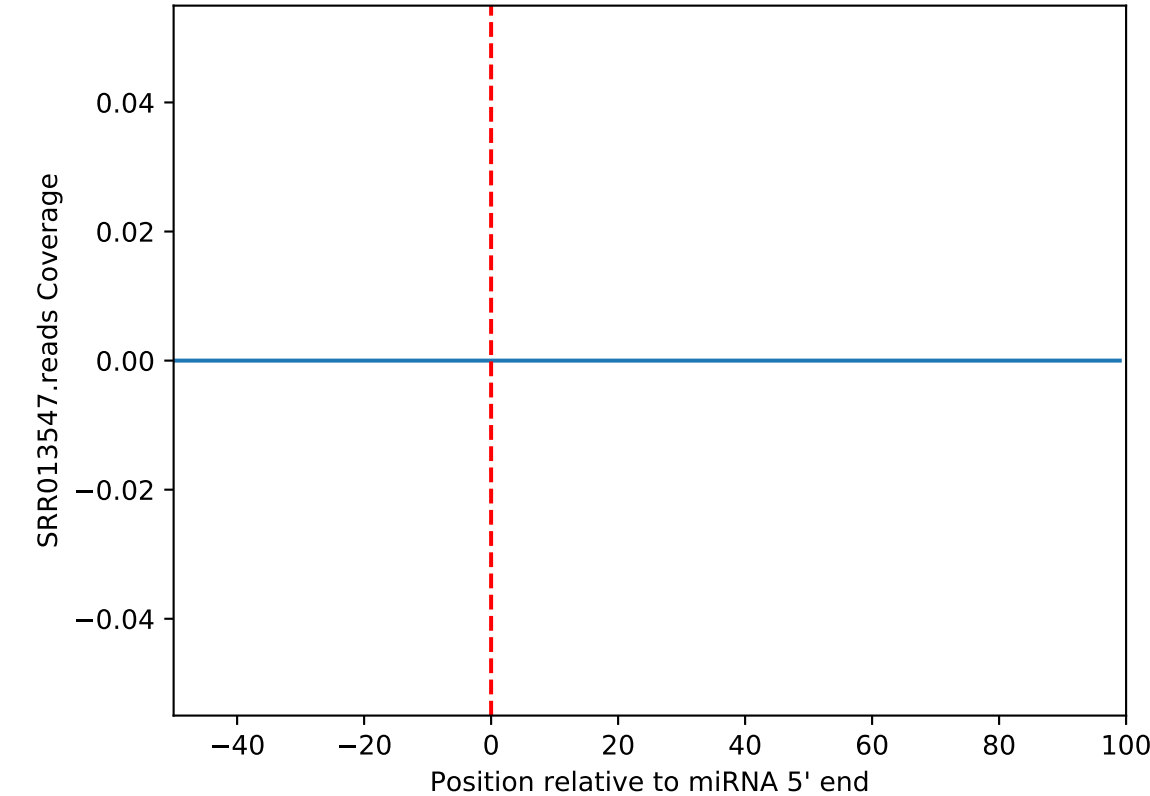

mir-2496 (chrX:2010310(+))

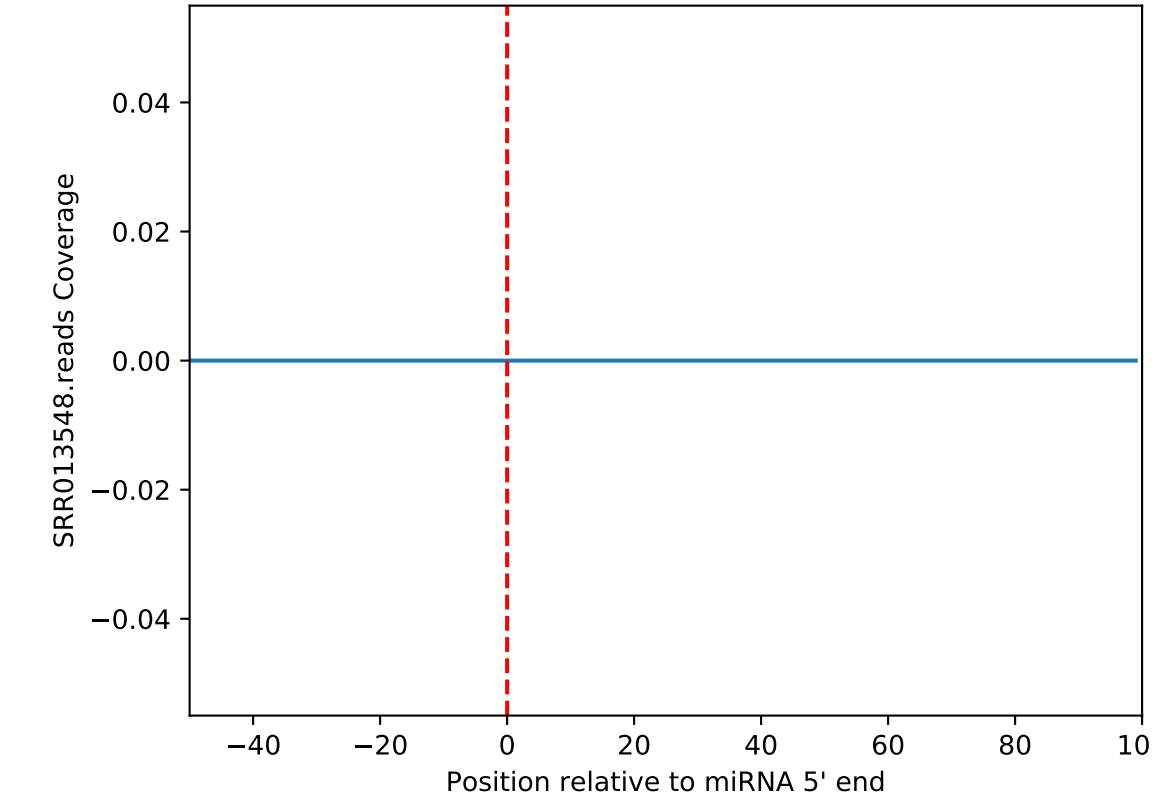

mir-967 (chr2L:12460090(-))

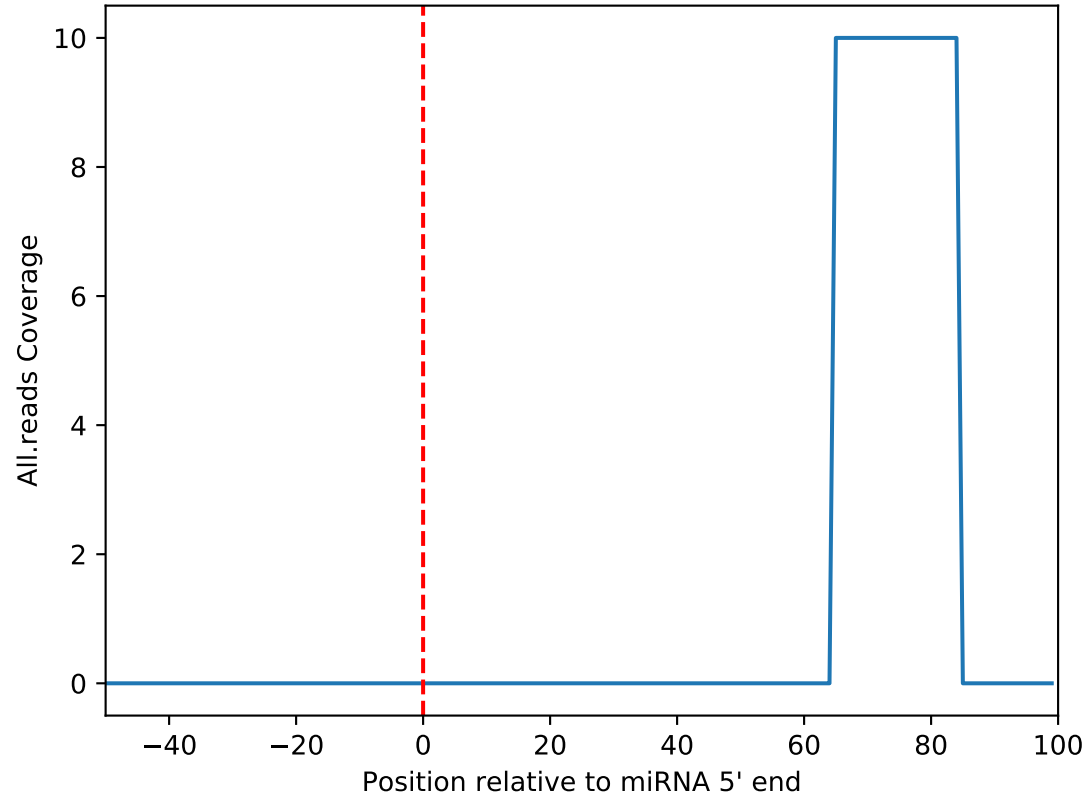

mir-967 (chr2L:12460090(-))

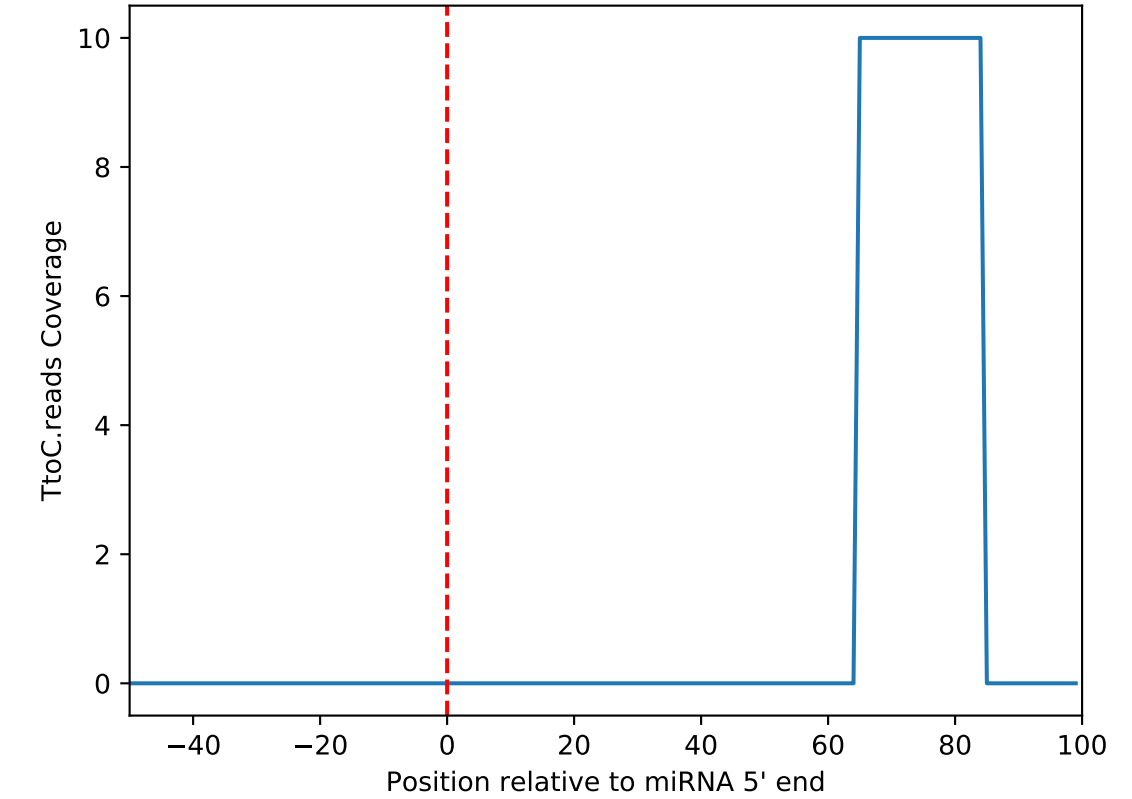

mir-967 (chr2L:12460090(-))

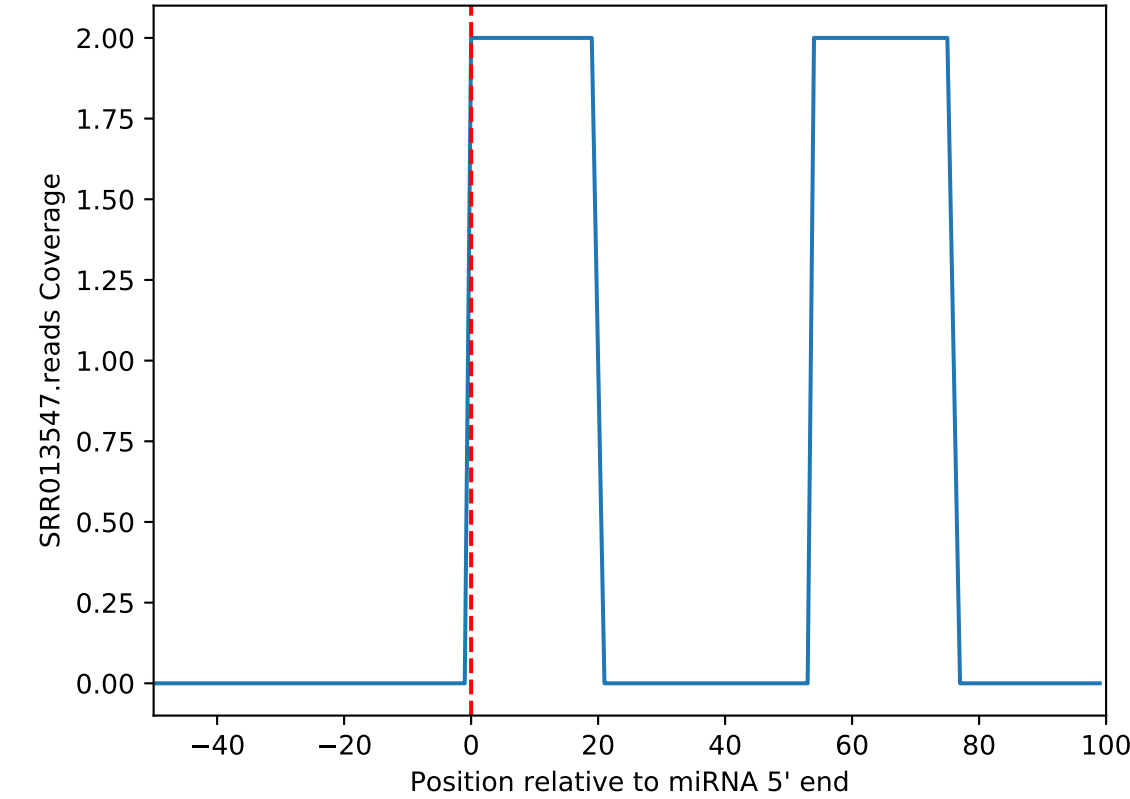

mir-967 (chr2L:12460090(-))

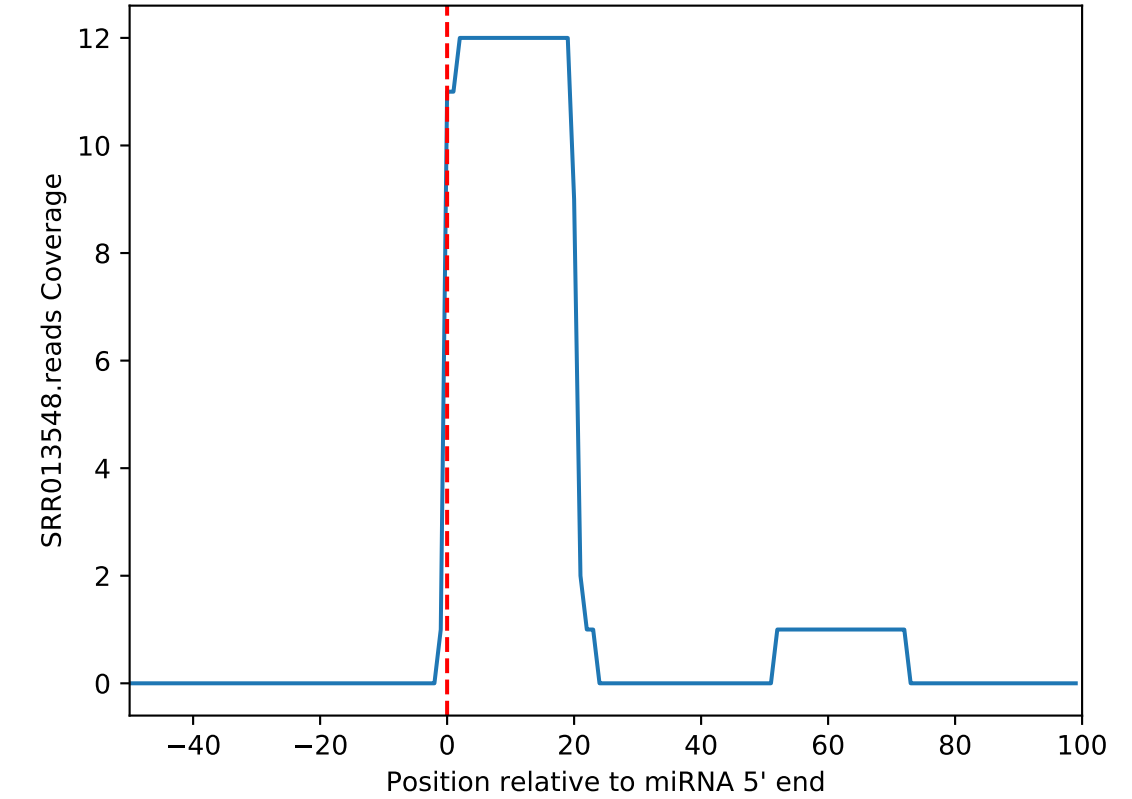

mir-958 (chr3L:22669365(-))

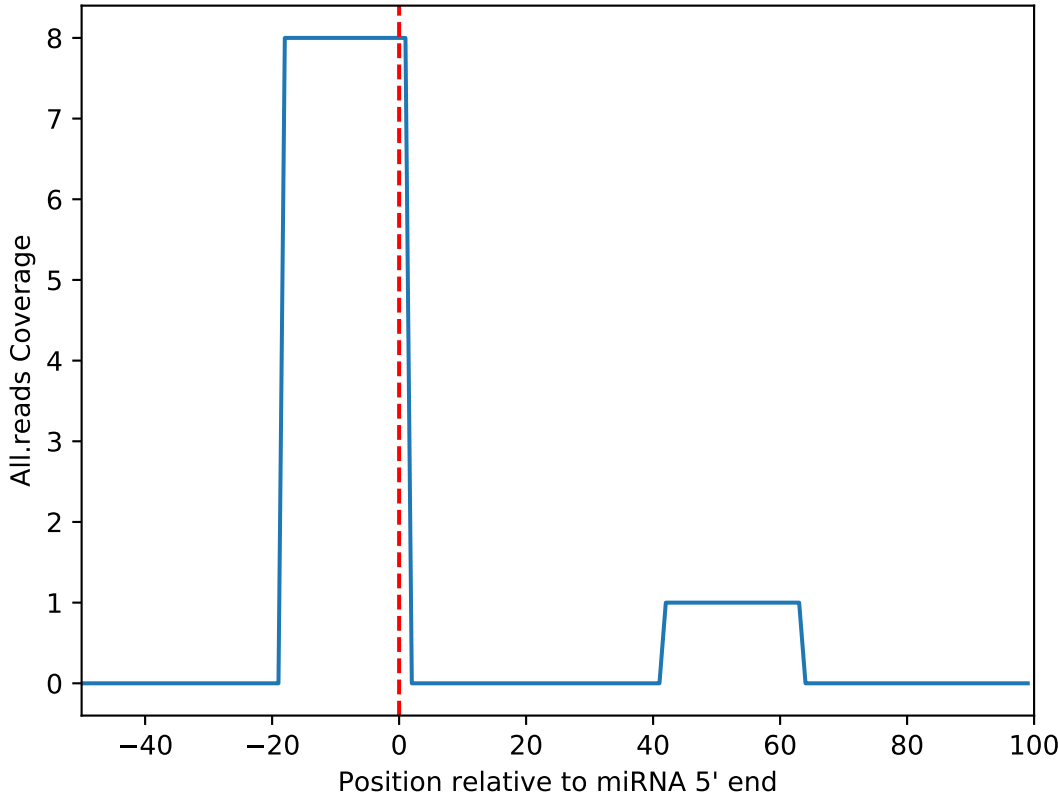

mir-958 (chr3L:22669365(-))



mir-958 (chr3L:22669365(-))



mir-958 (chr3L:22669365(-))

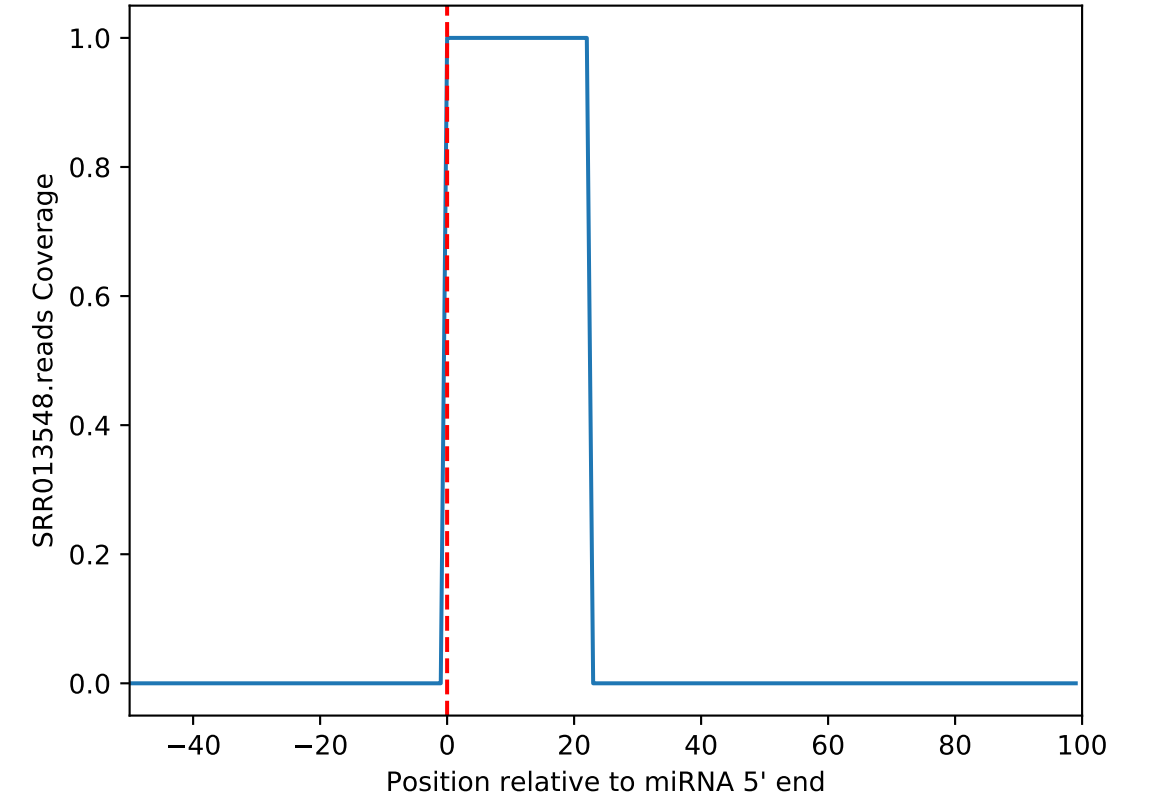



mir-2283 (chr3R:9517533(+))

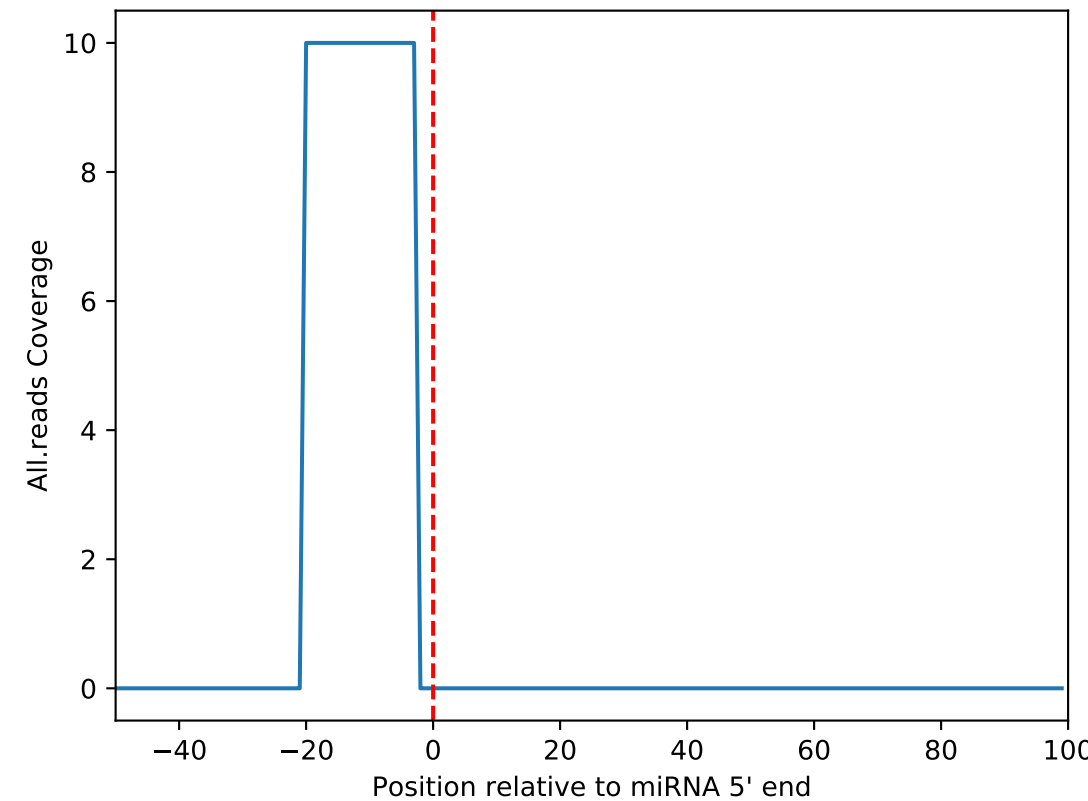

mir-2283 (chr3R:9517533(+))

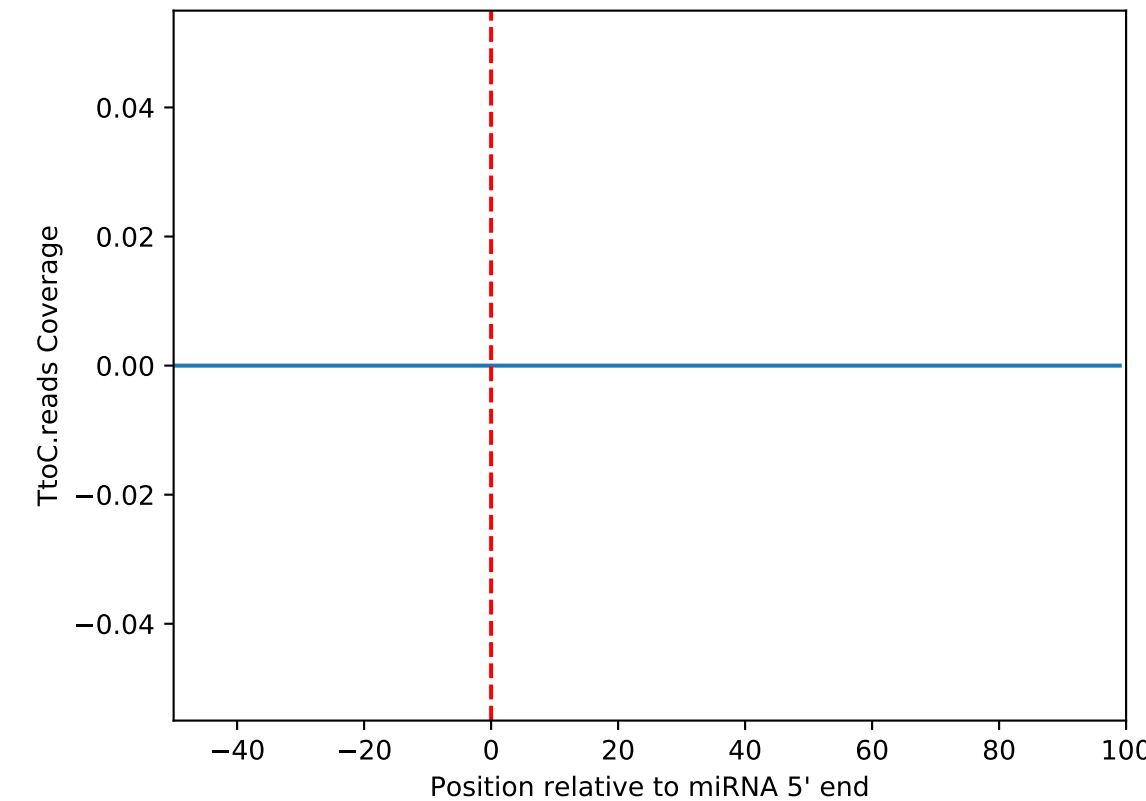

mir-2283 (chr3R:9517533(+))

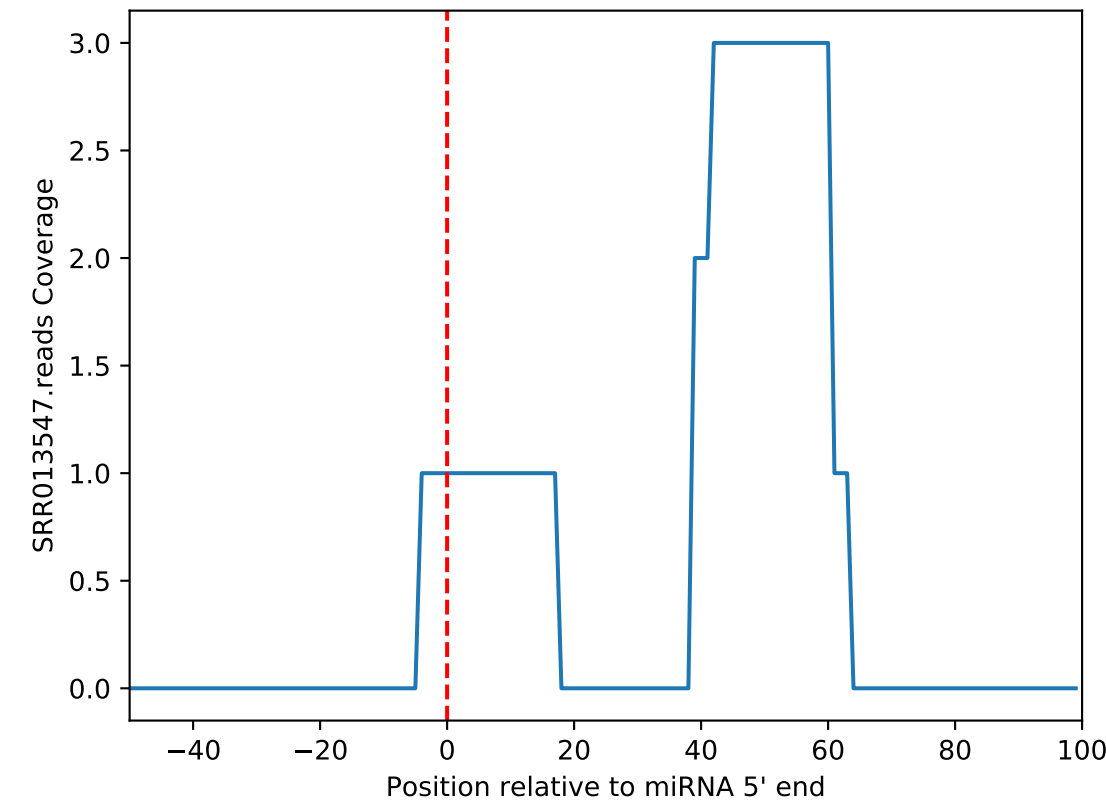

mir-2283 (chr3R:9517533(+))

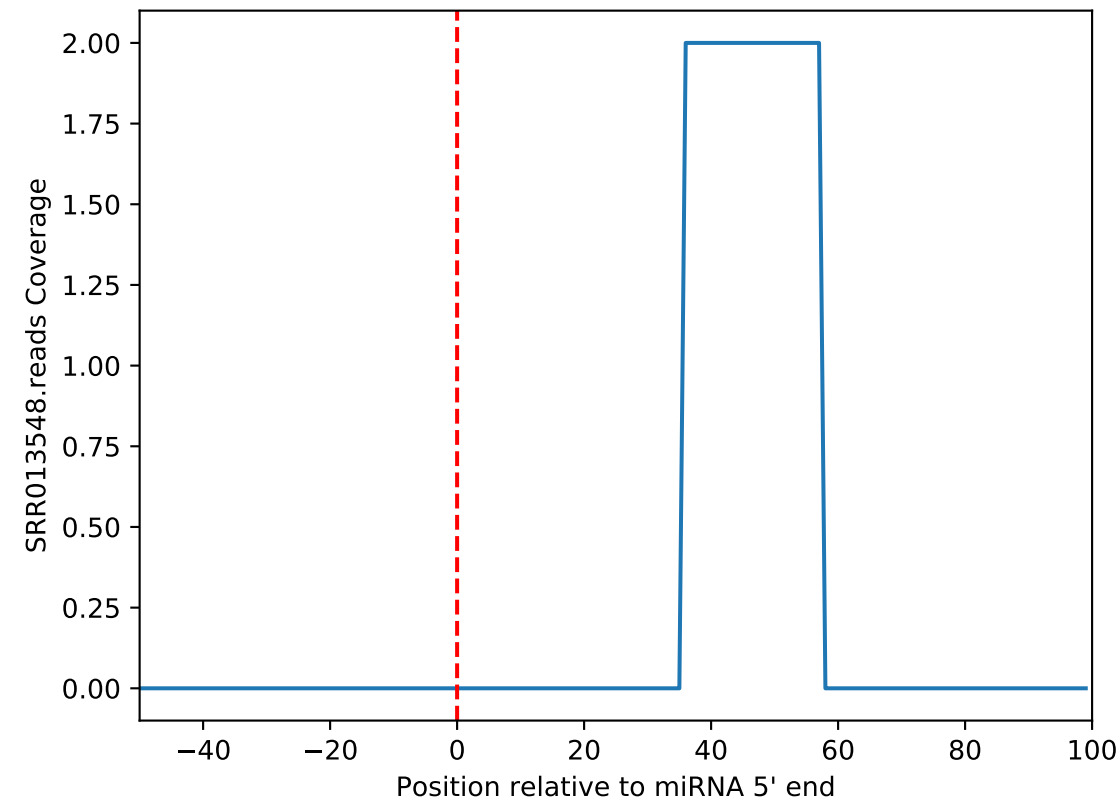

mir-2491 (chrX:22833566(-))

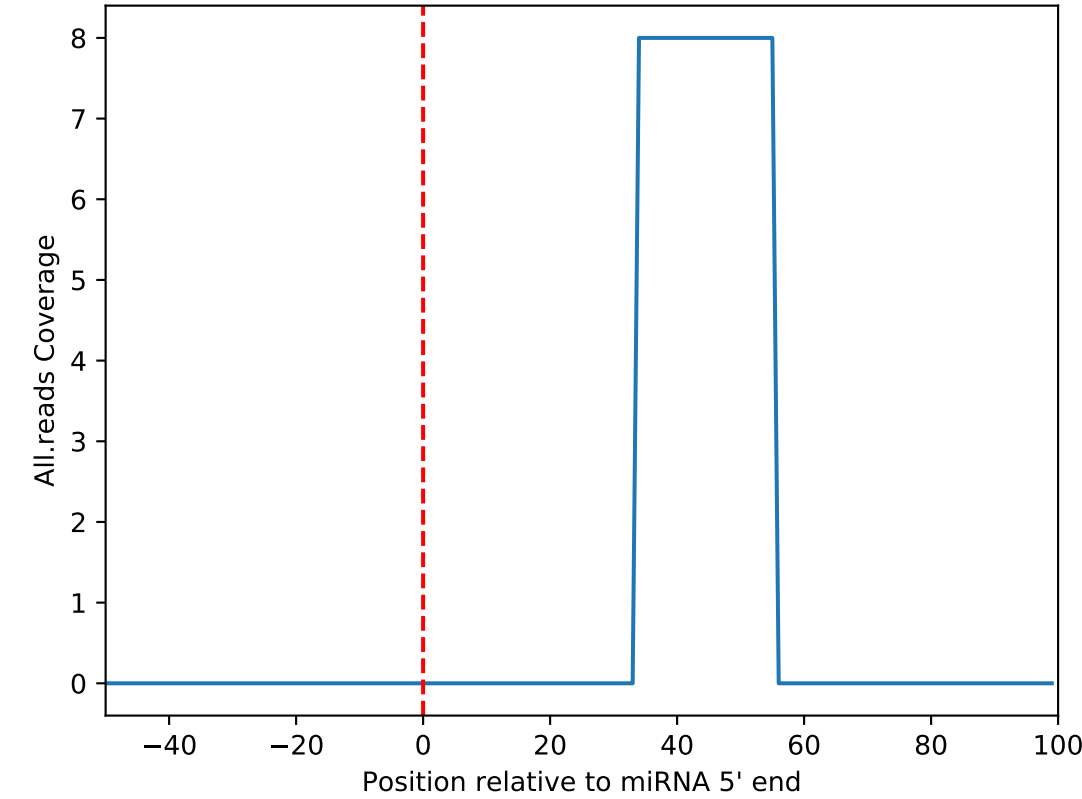

mir-2491 (chrX:22833566(-))

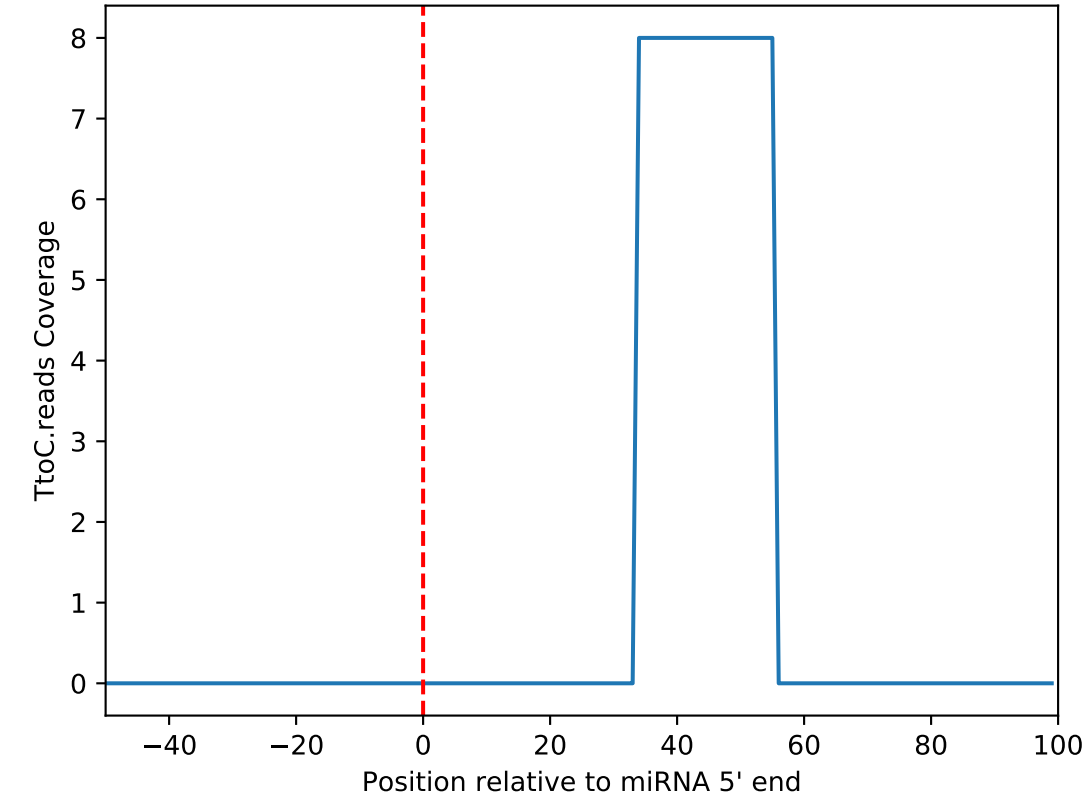

mir-2491 (chrX:22833566(-))

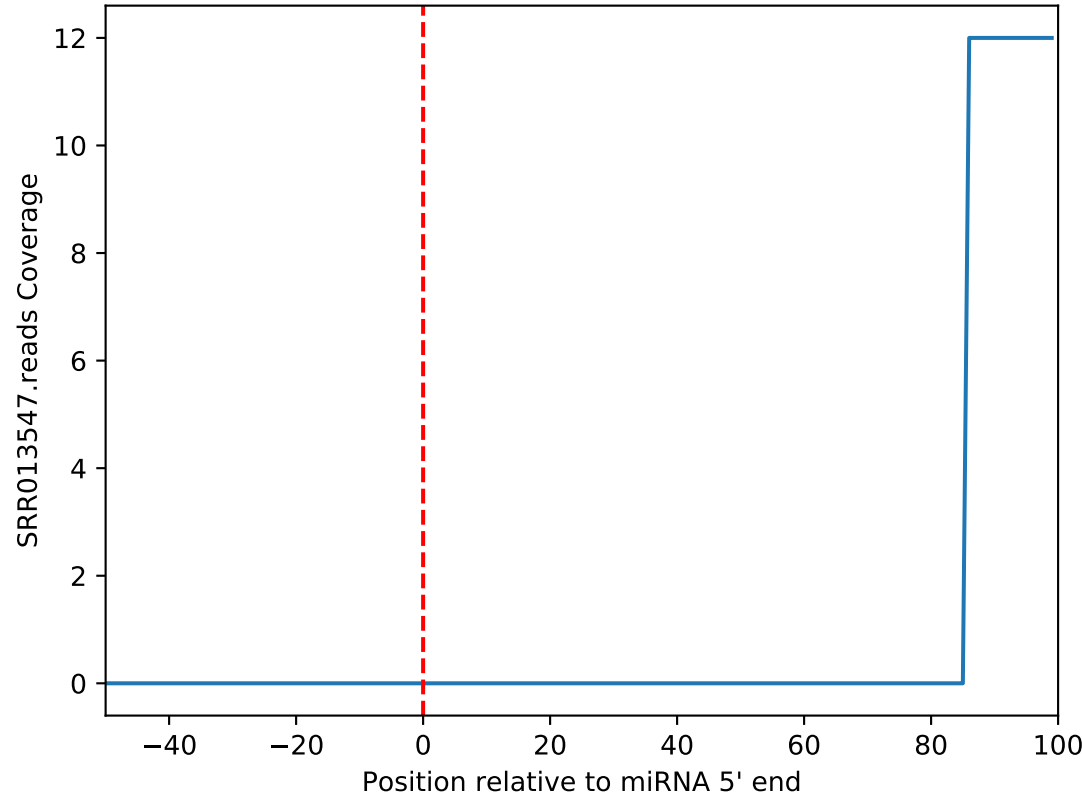

mir-2491 (chrX:22833566(-))

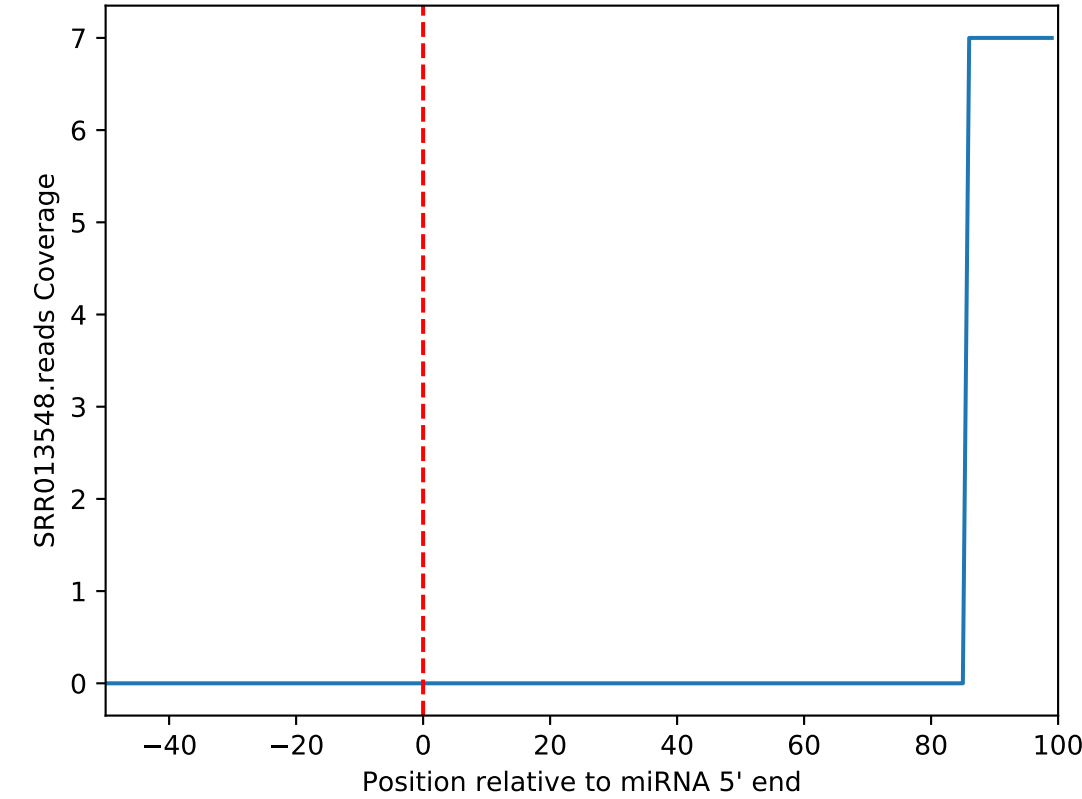

mir-4952 (chr3R:22480847(+))

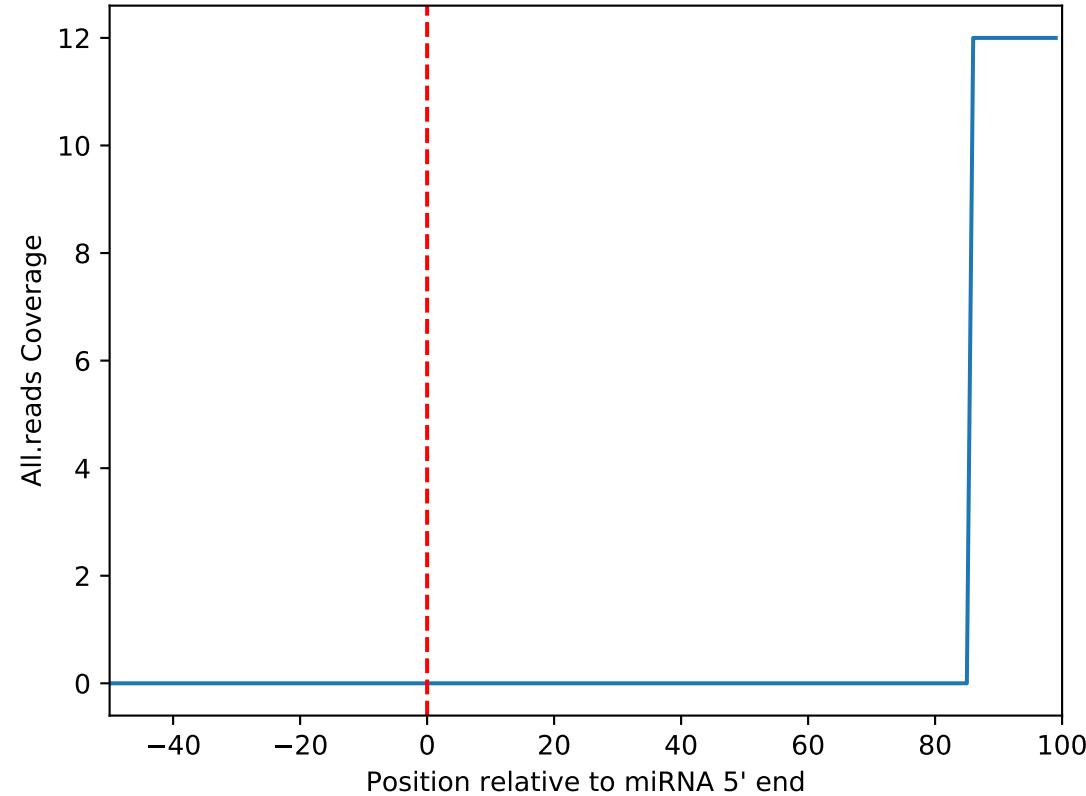

mir-4952 (chr3R:22480847(+))



mir-4952 (chr3R:22480847(+))

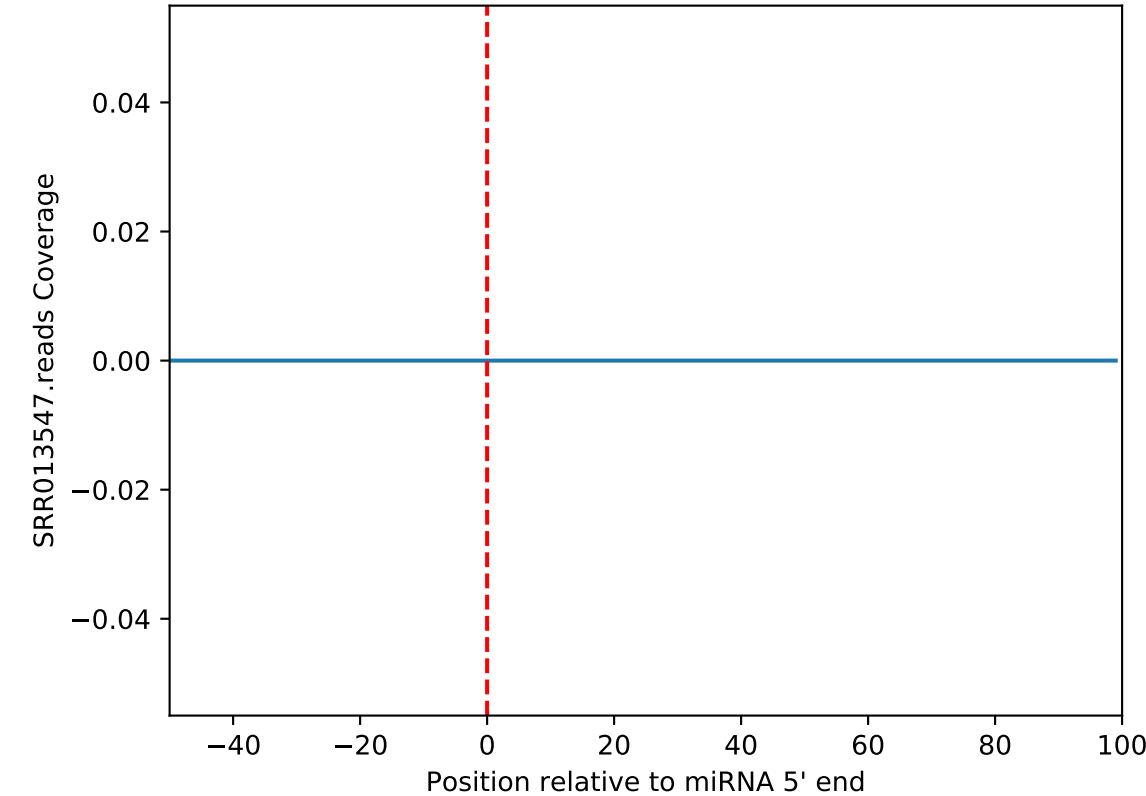

mir-4952 (chr3R:22480847(+))

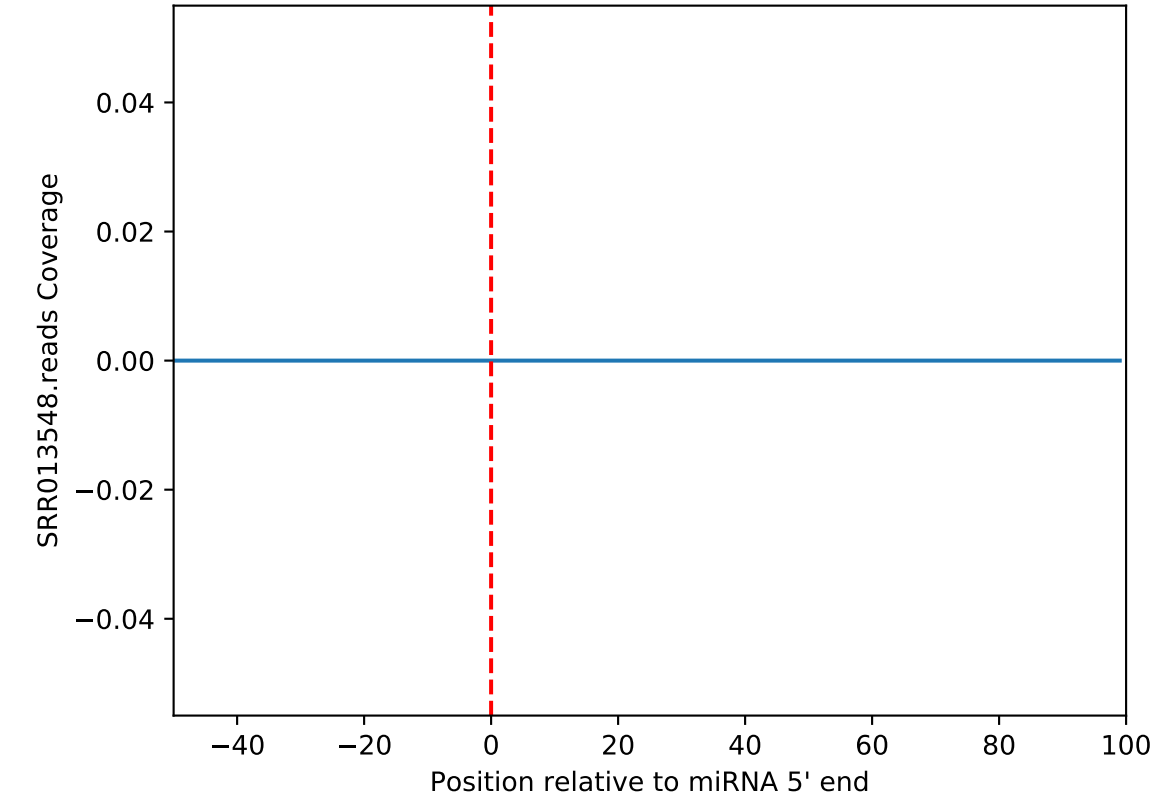

mir-981 (chrX:1788939(-))

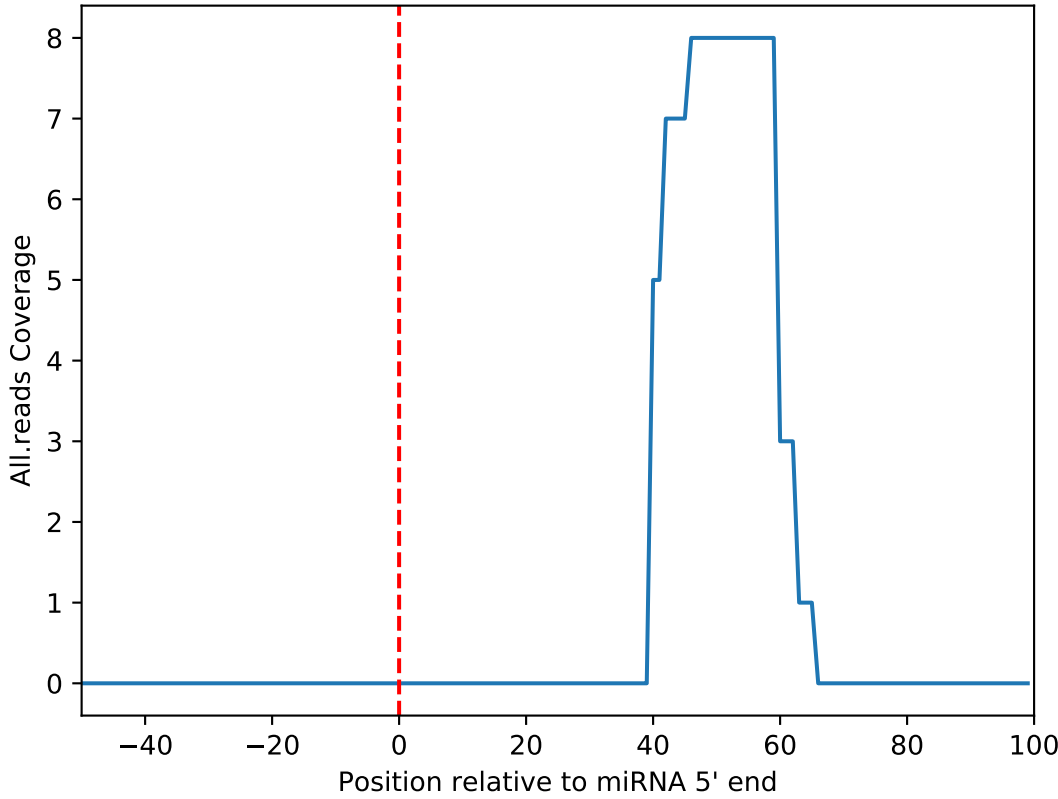

mir-981 (chrX:1788939(-))



mir-981 (chrX:1788939(-))

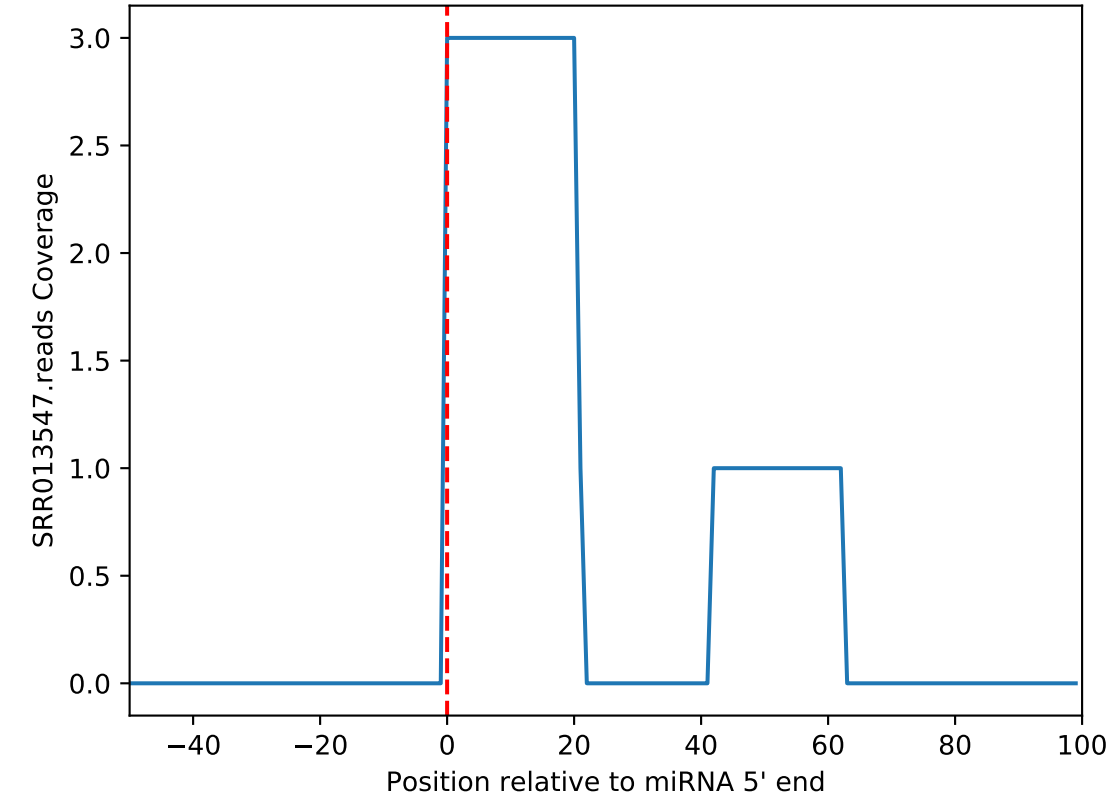

mir-981 (chrX:1788939(-))

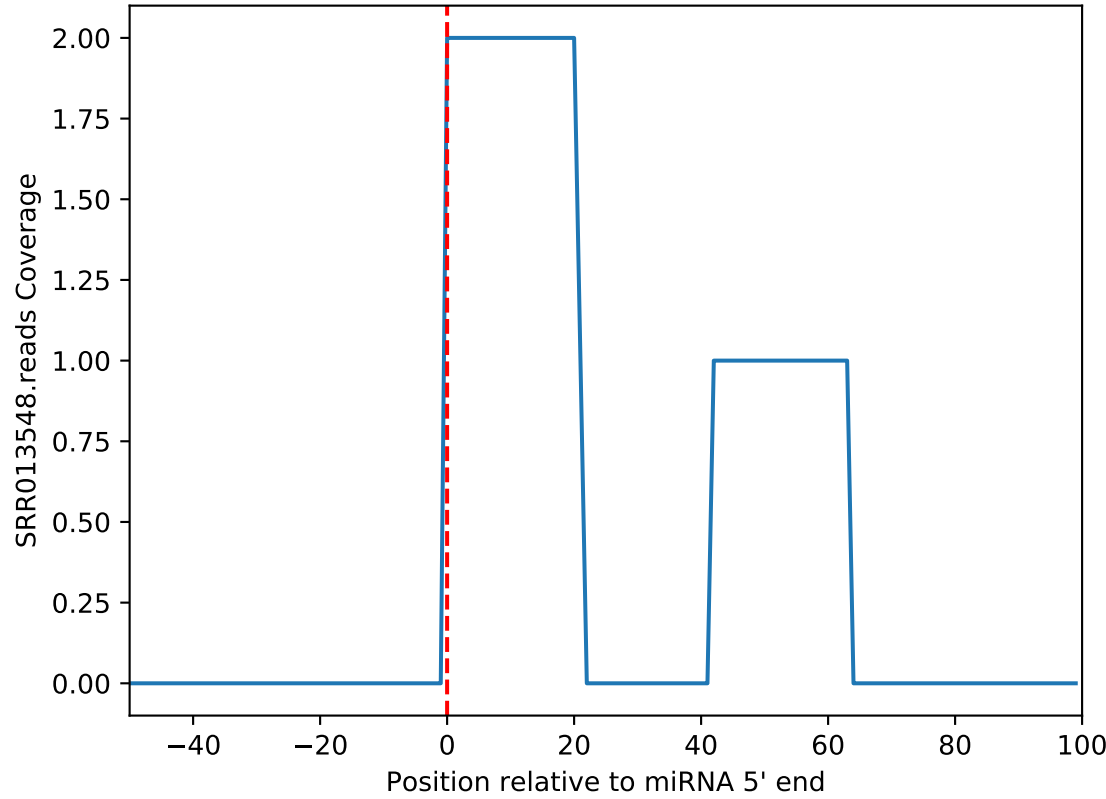

mir-4967 (chr2R:10012174(-))

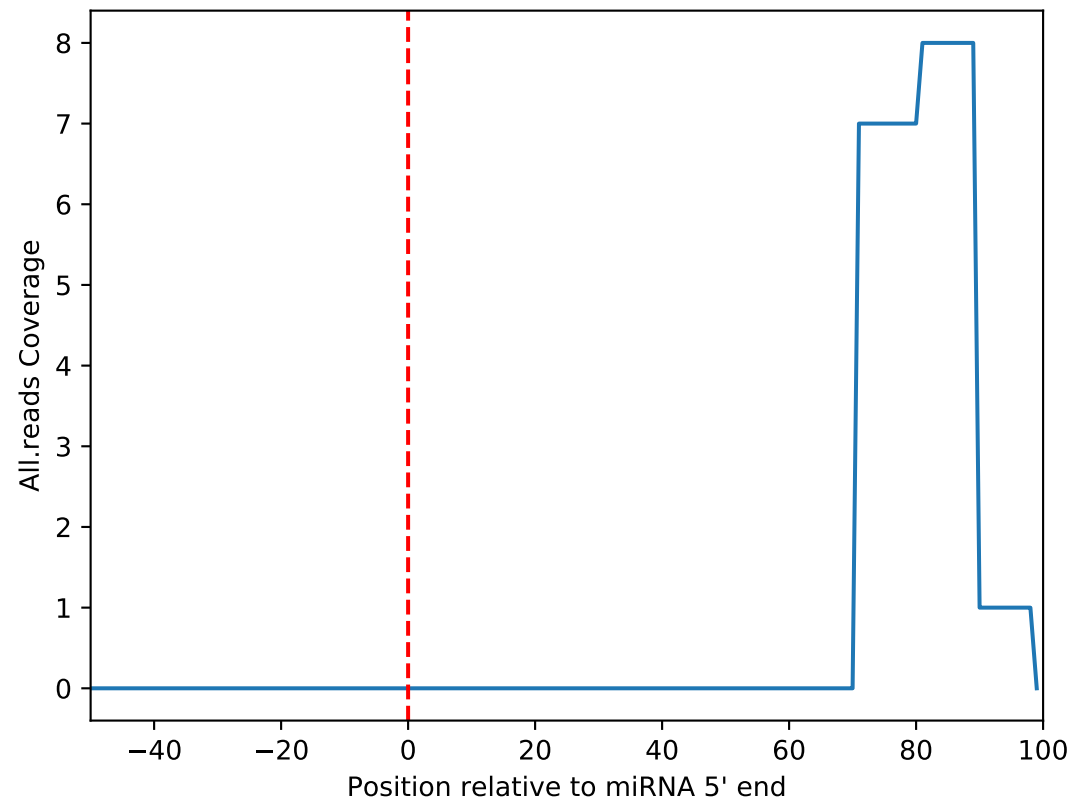

mir-4967 (chr2R:10012174(-))



mir-4967 (chr2R:10012174(-))



mir-4967 (chr2R:10012174(-))

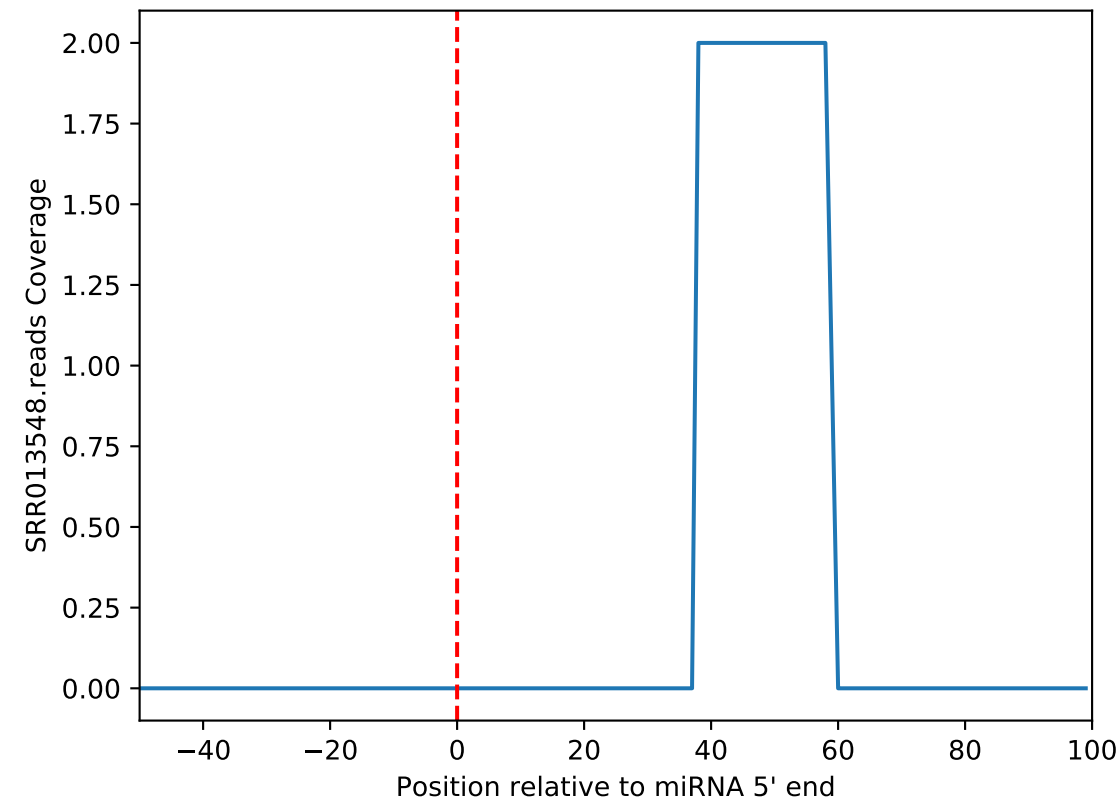

mir-6-2 (chr2R:19660935(-))

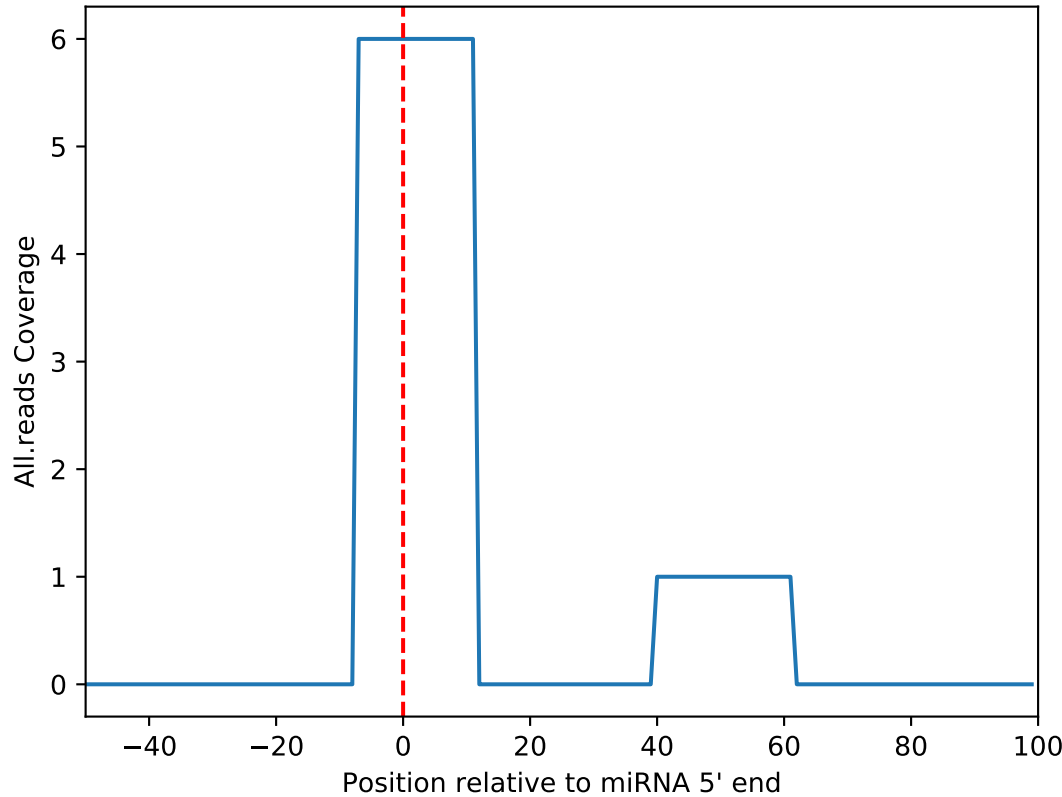

mir-6-2 (chr2R:19660935(-))

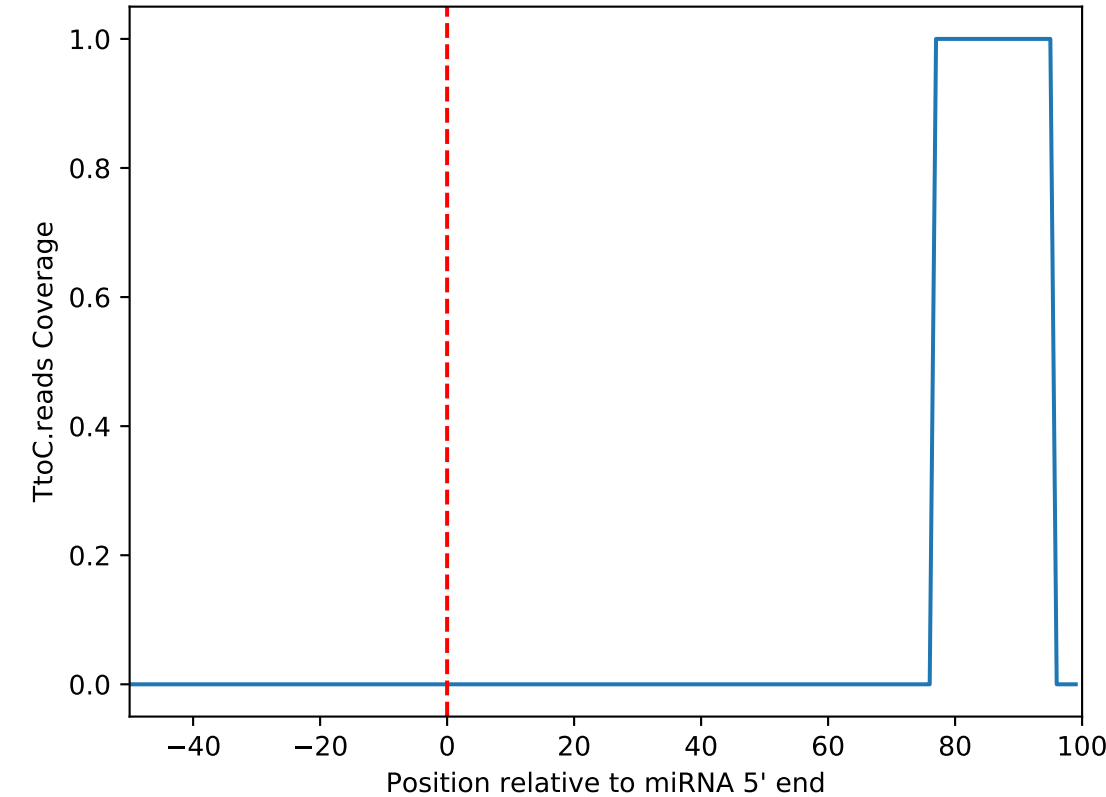

mir-6-2 (chr2R:19660935(-))

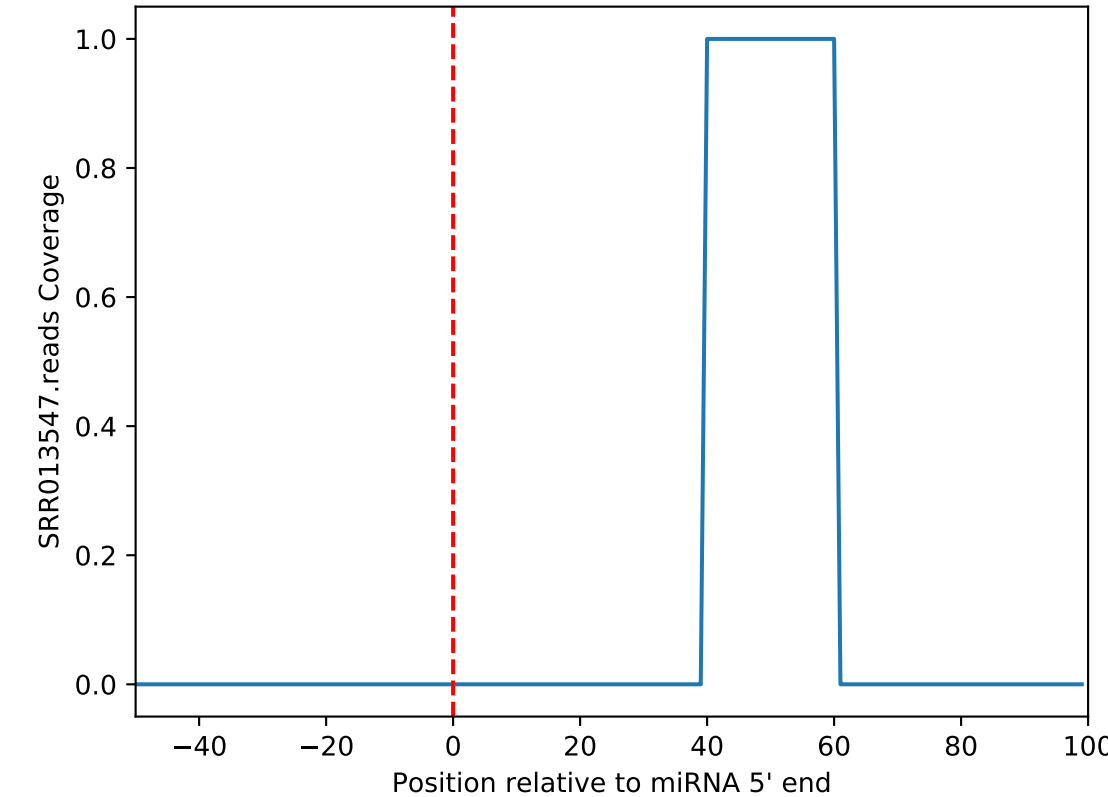

mir-6-2 (chr2R:19660935(-))

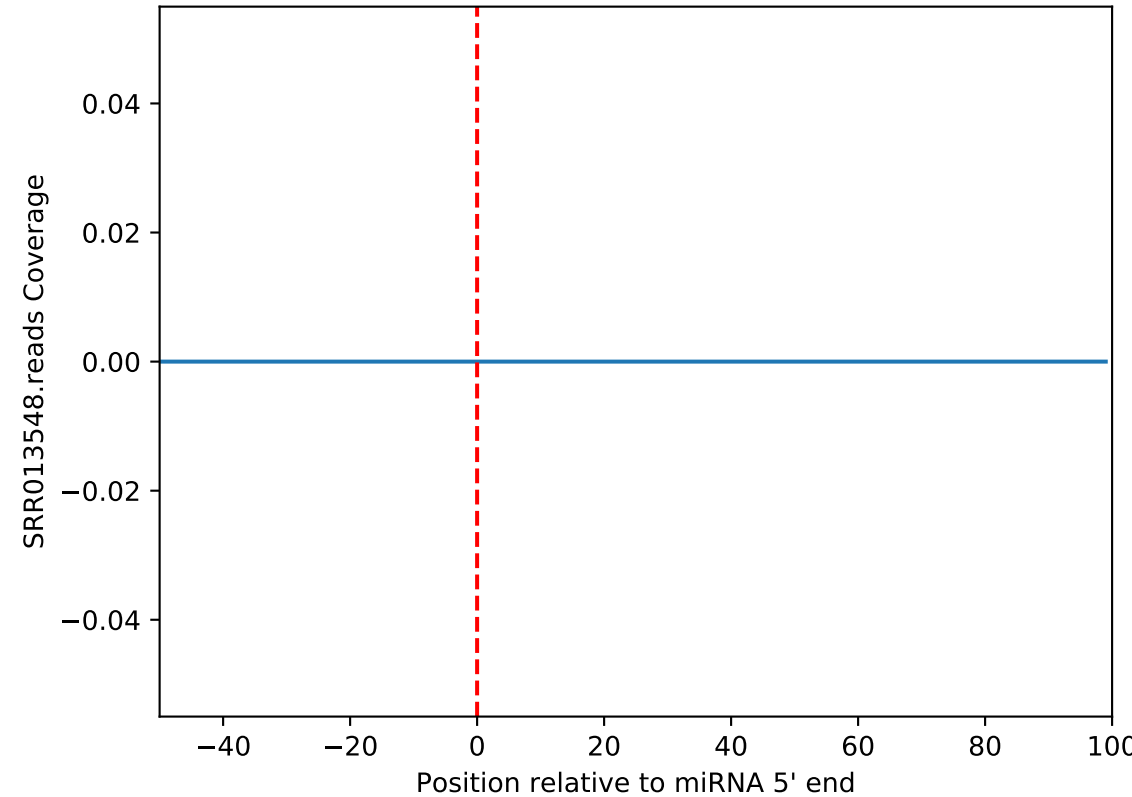

mir-955 (chr3L:3299072(+))

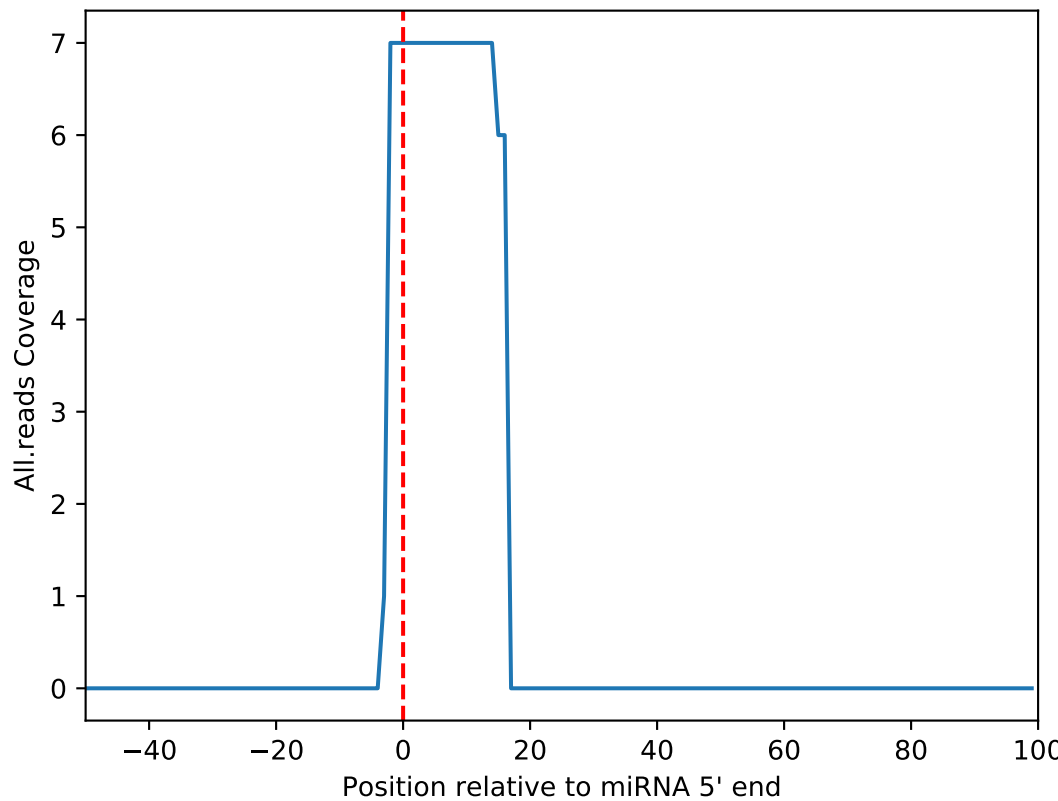

mir-955 (chr3L:3299072(+))



mir-955 (chr3L:3299072(+))

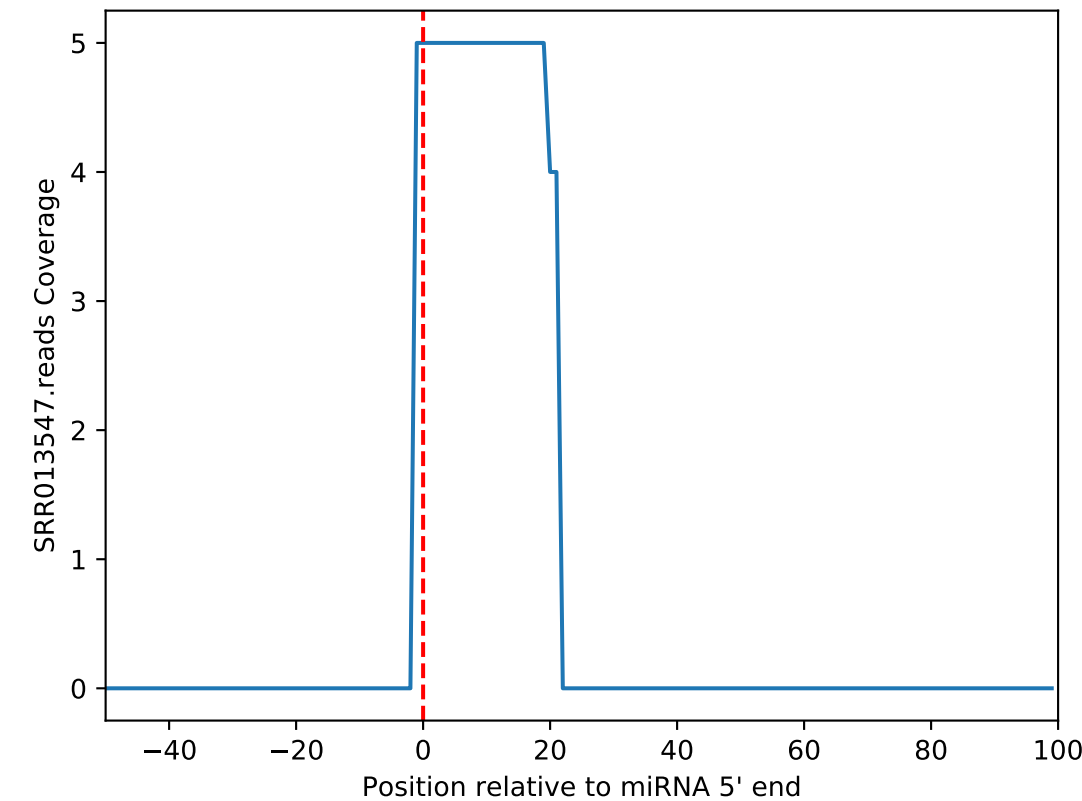

mir-955 (chr3L:3299072(+))

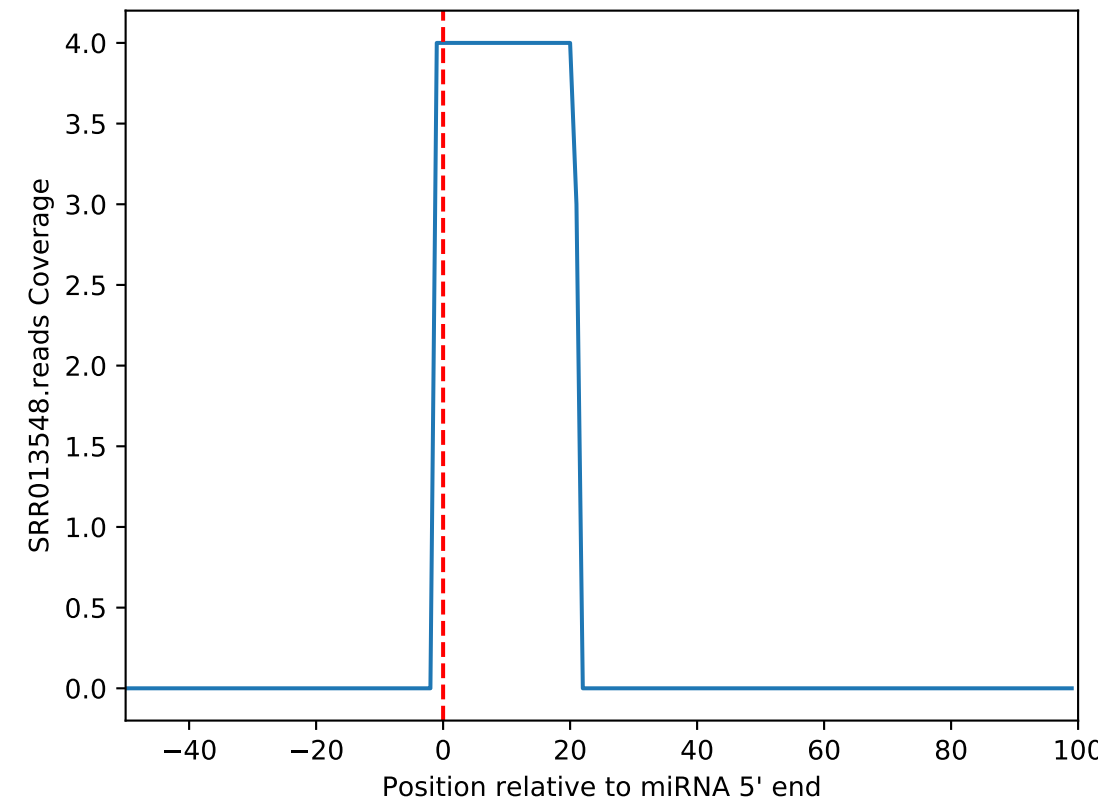

mir-4949 (chr3R:31219353(-))

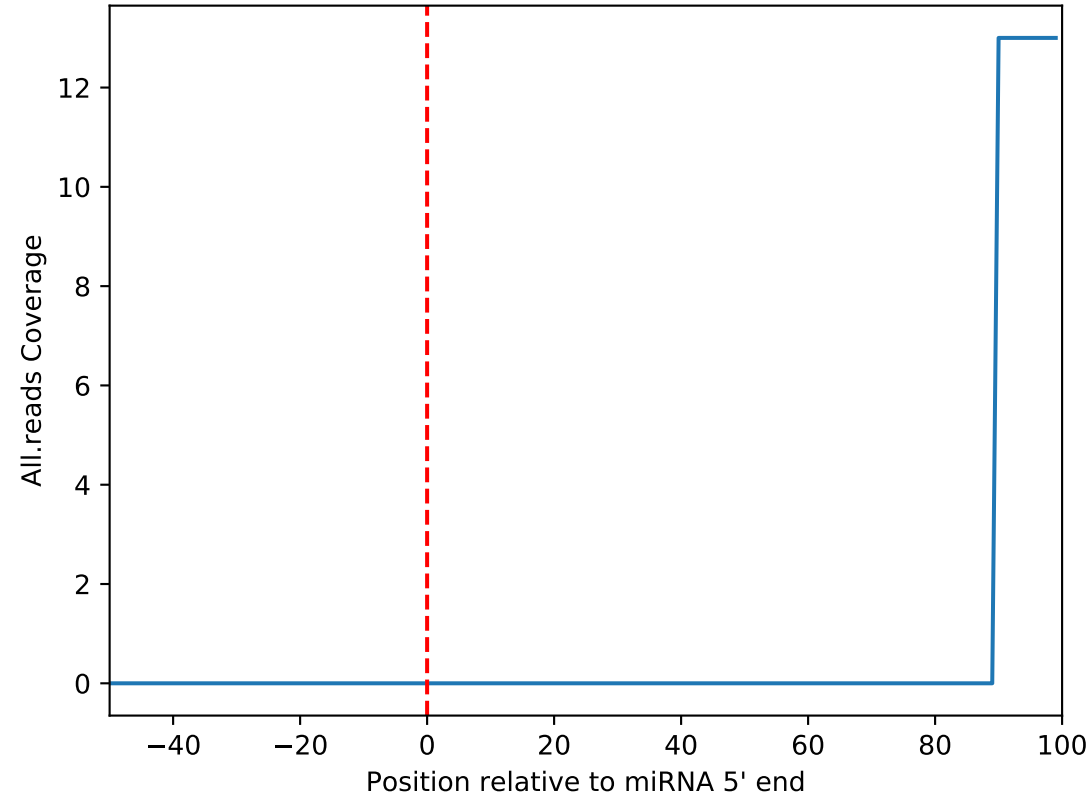

mir-4949 (chr3R:31219353(-))

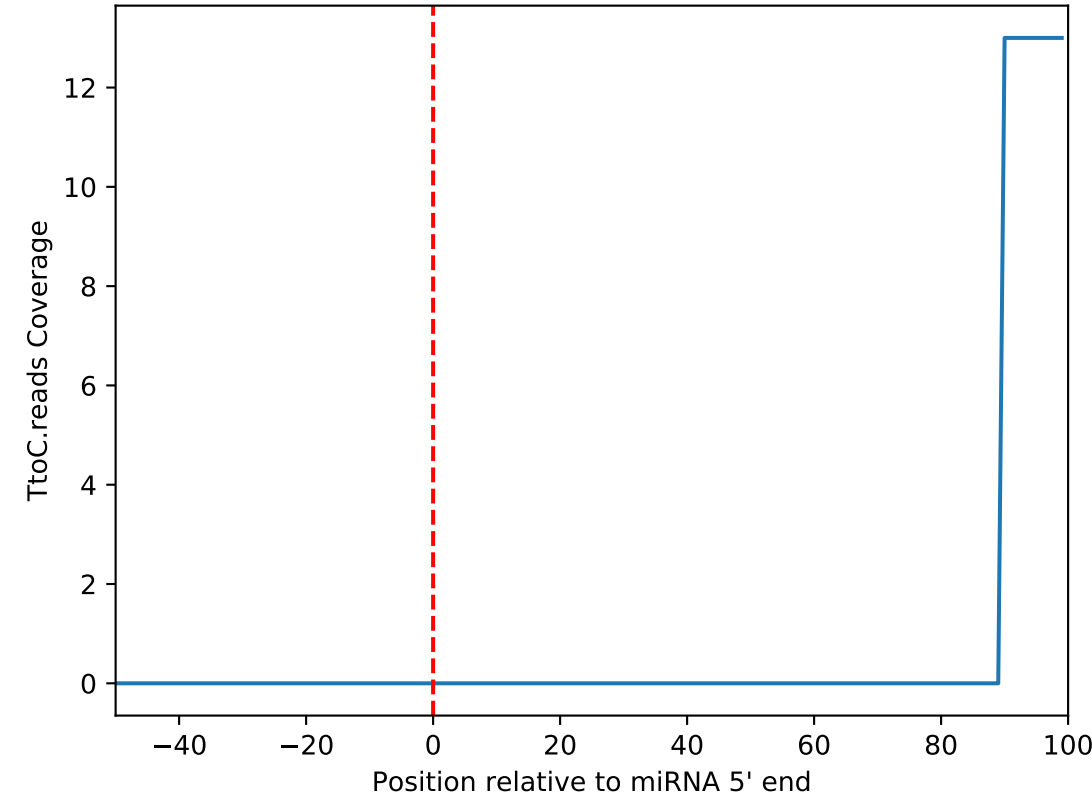

mir-4949 (chr3R:31219353(-))

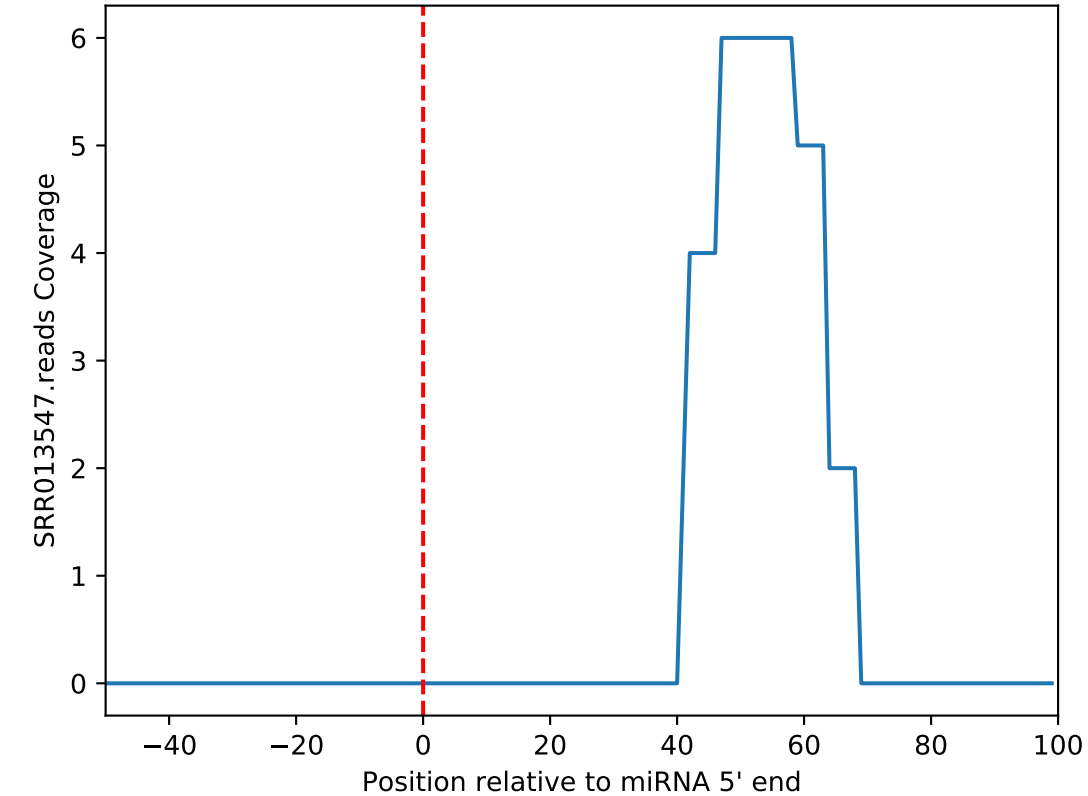

mir-4949 (chr3R:31219353(-))

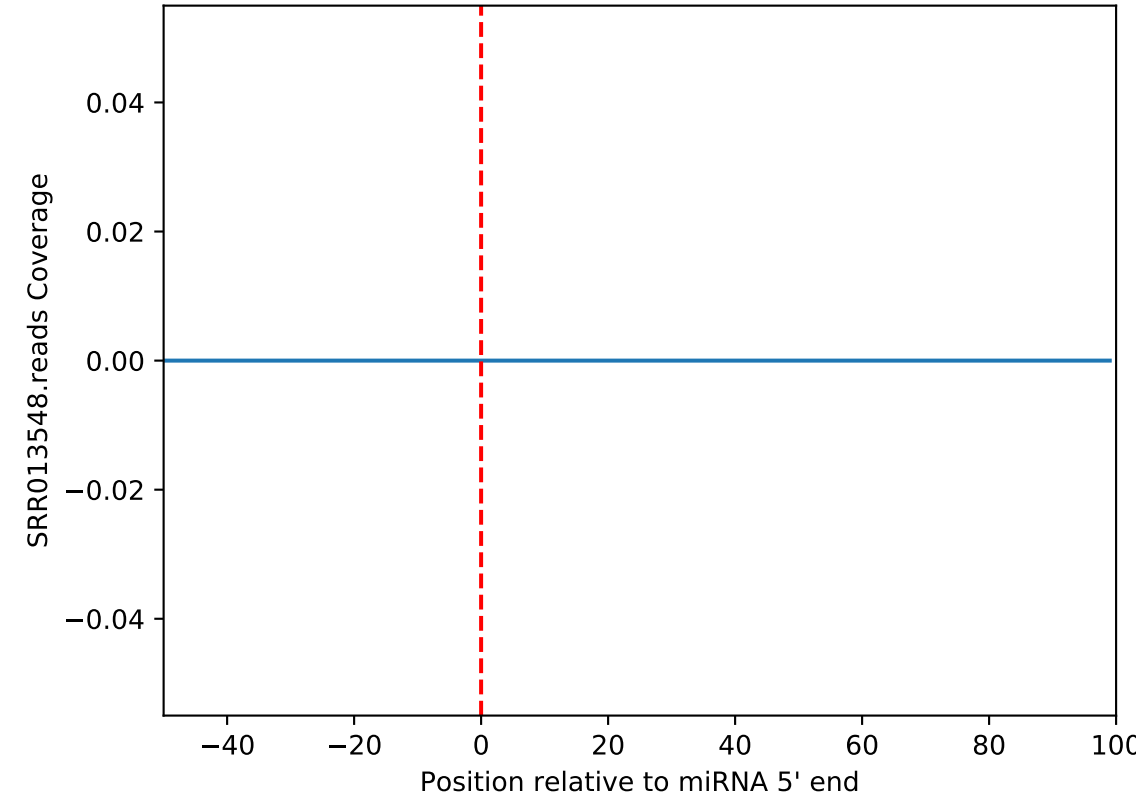



mir-9370 (chrX:11710301(-))

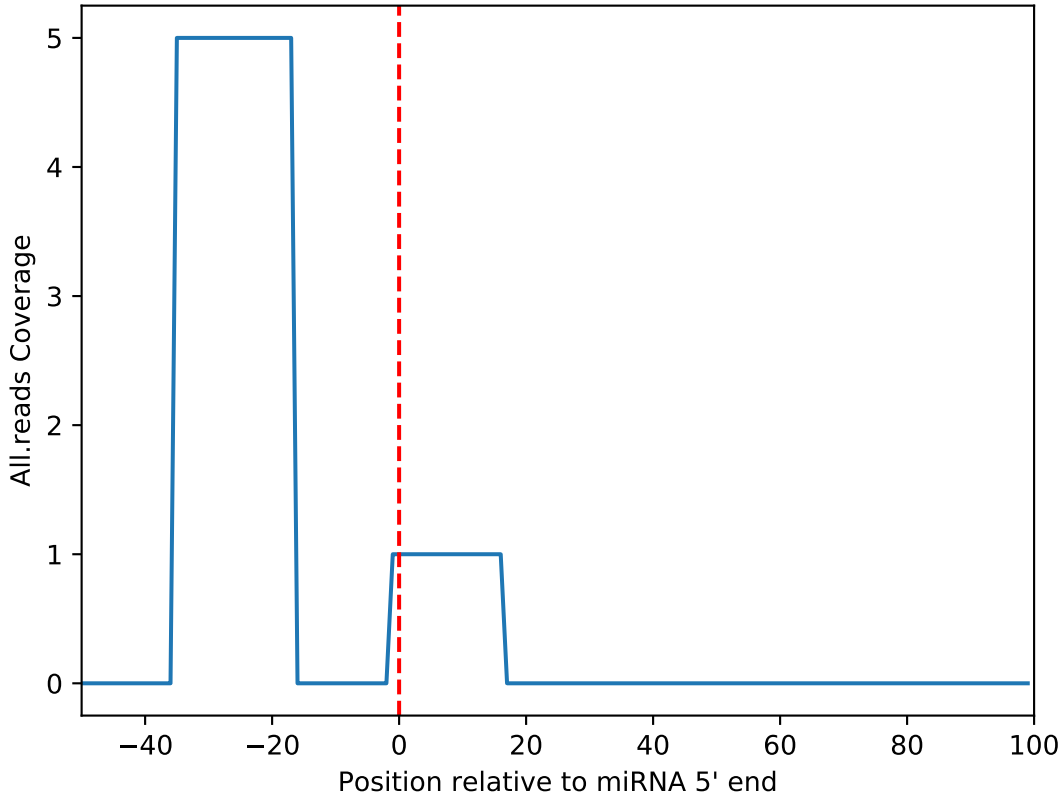

mir-9370 (chrX:11710301(-))



mir-9370 (chrX:11710301(-))

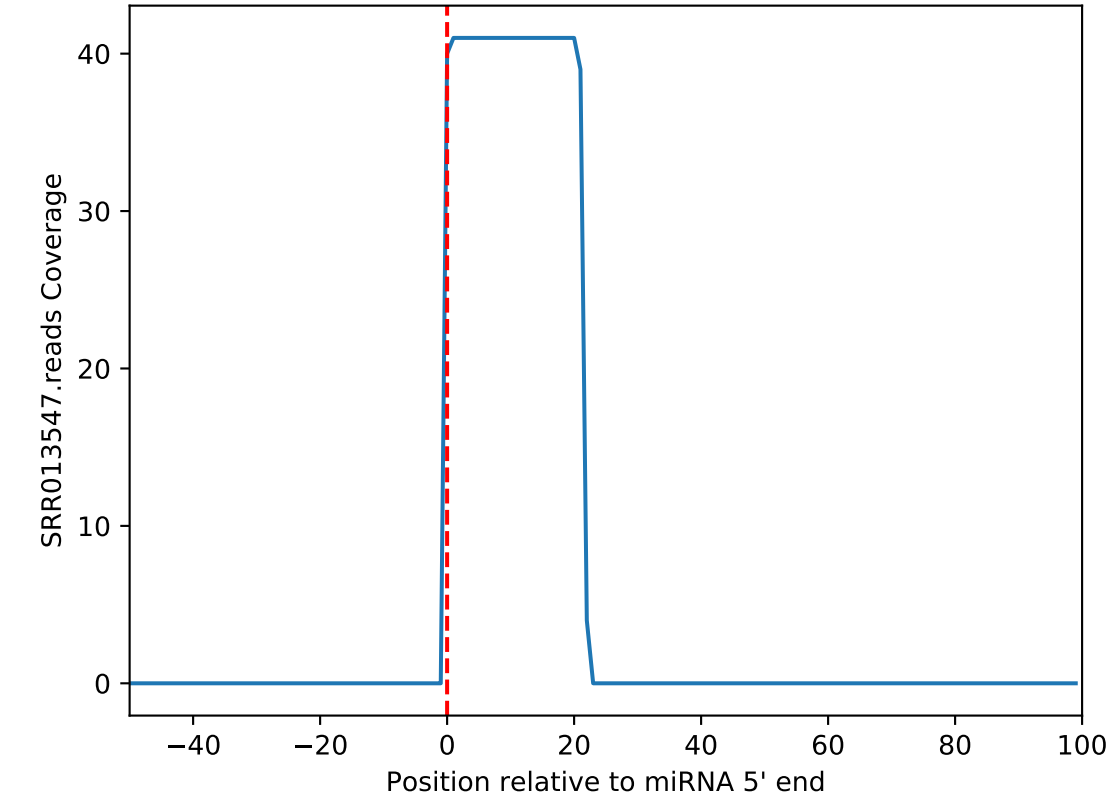

mir-9370 (chrX:11710301(-))

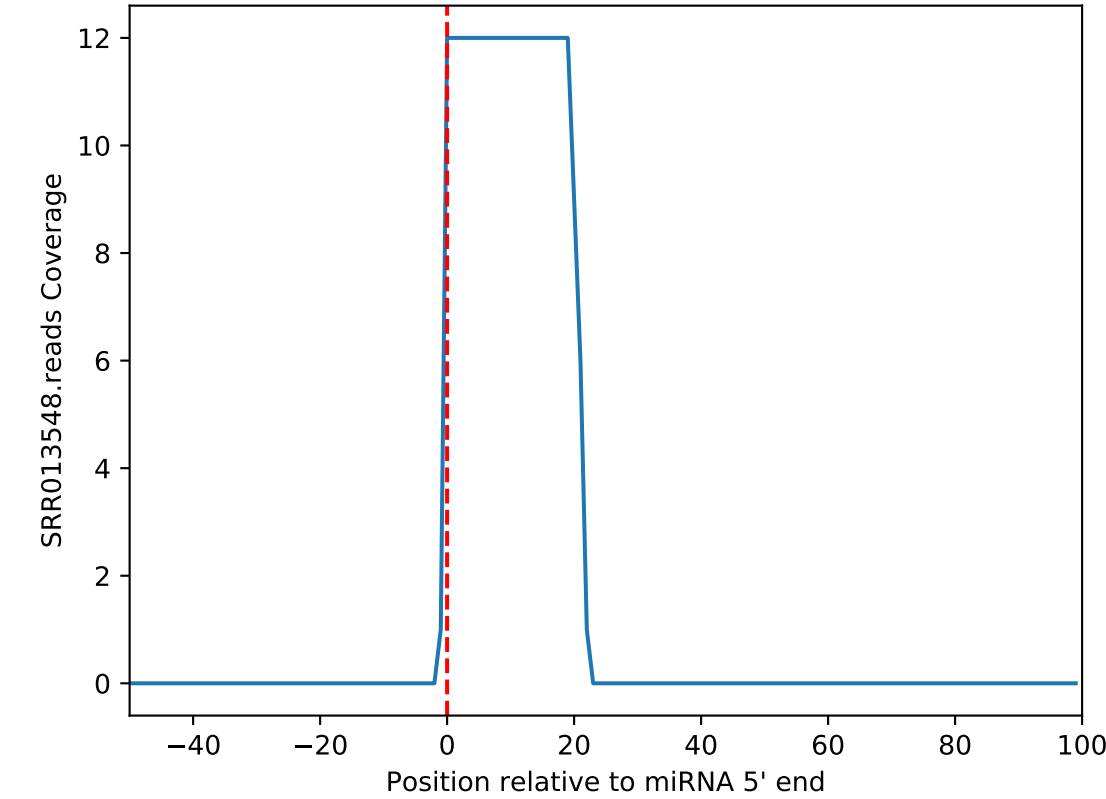

mir-4962 (chrX:3777408(+))

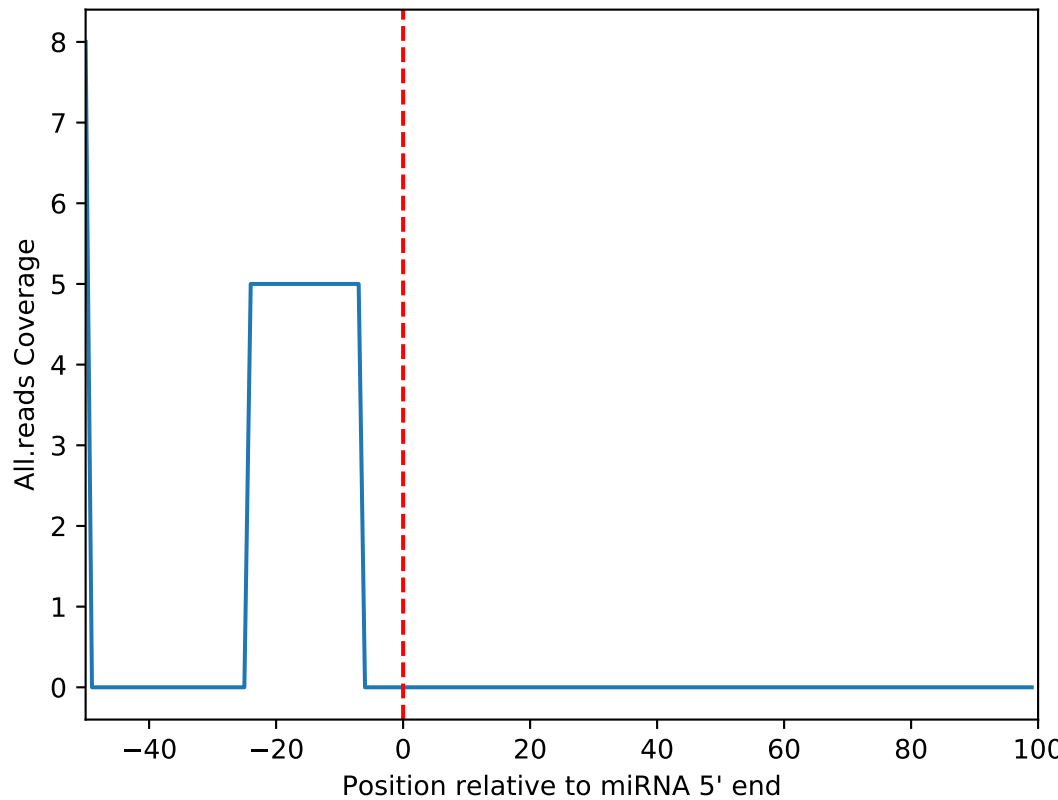

mir-4962 (chrX:3777408(+))

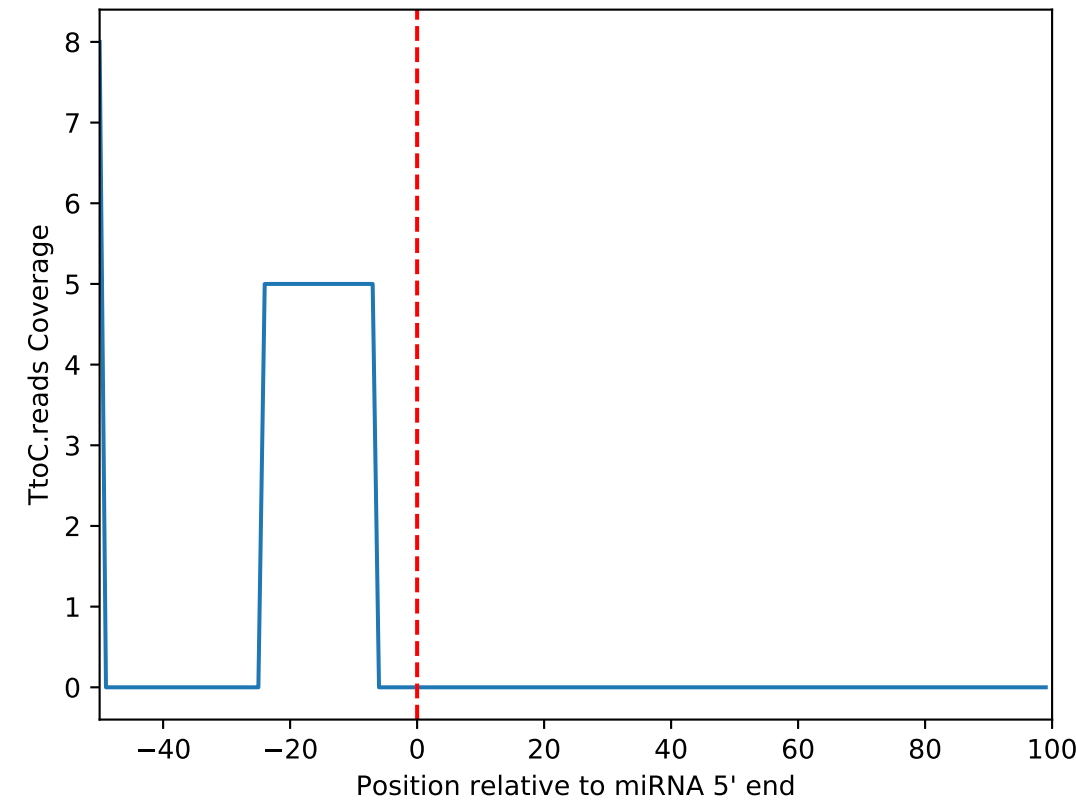

mir-4962 (chrX:3777408(+))

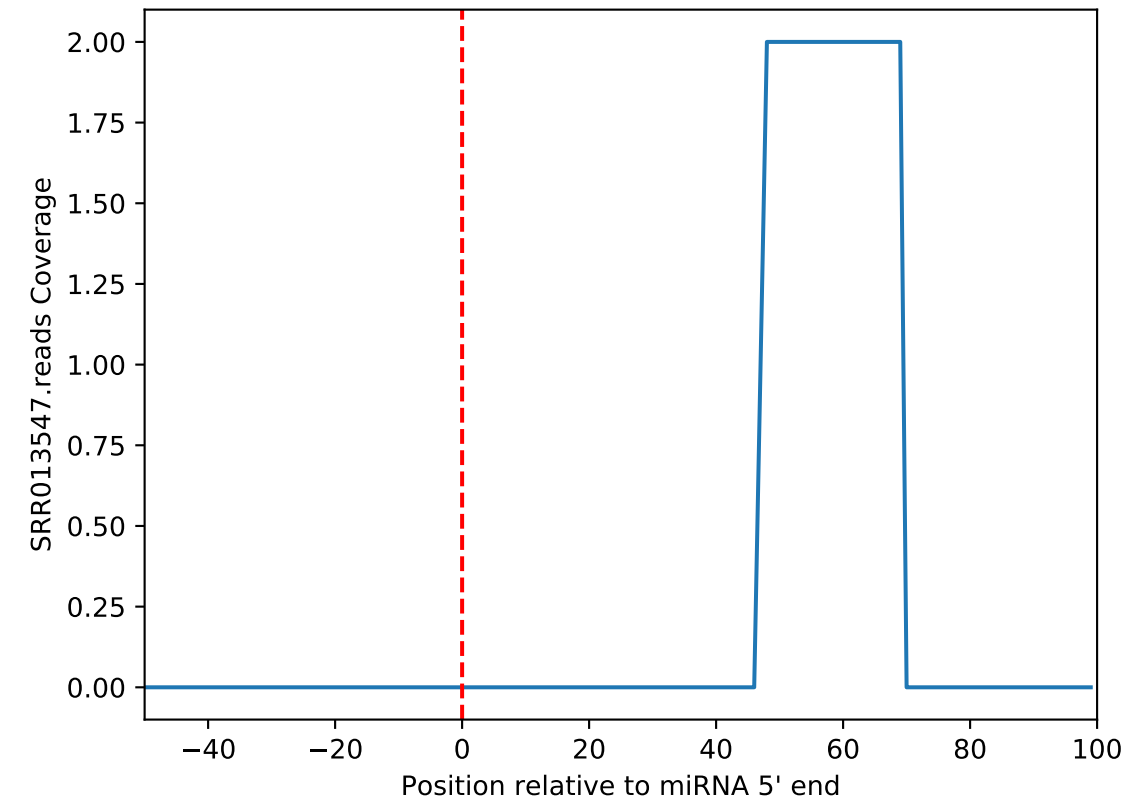

mir-4962 (chrX:3777408(+))

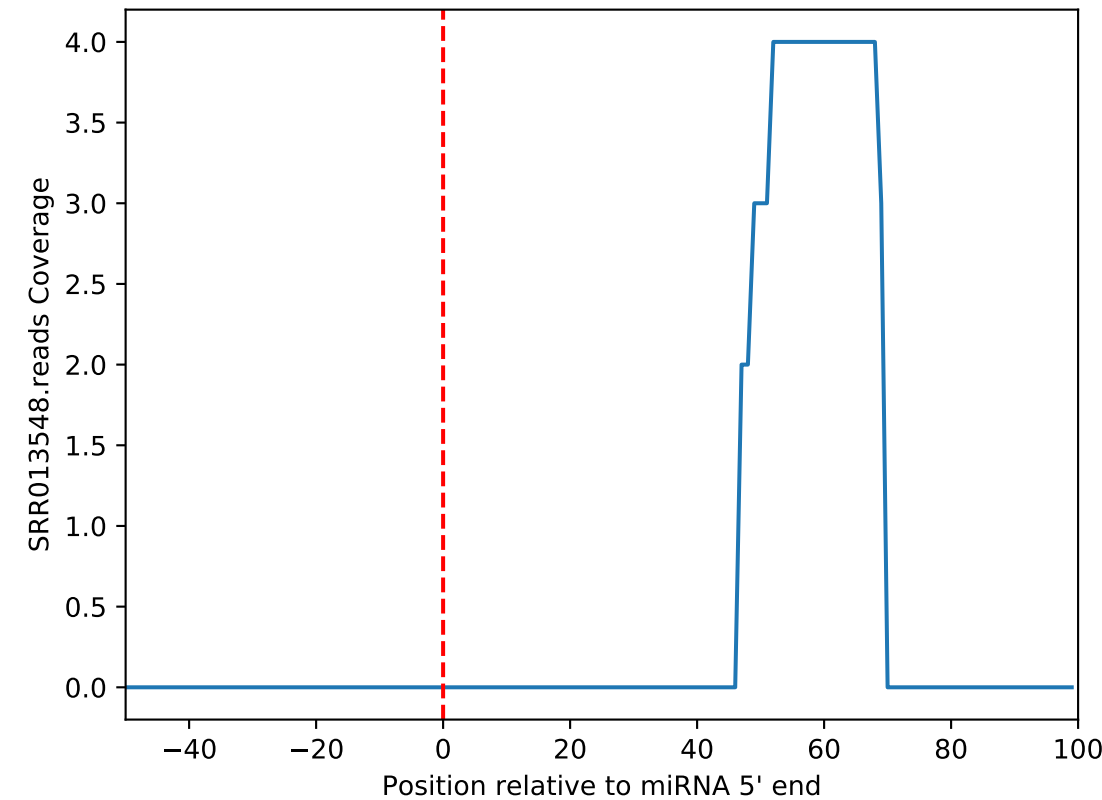

mir-9382 (chr2L:12724957(+))

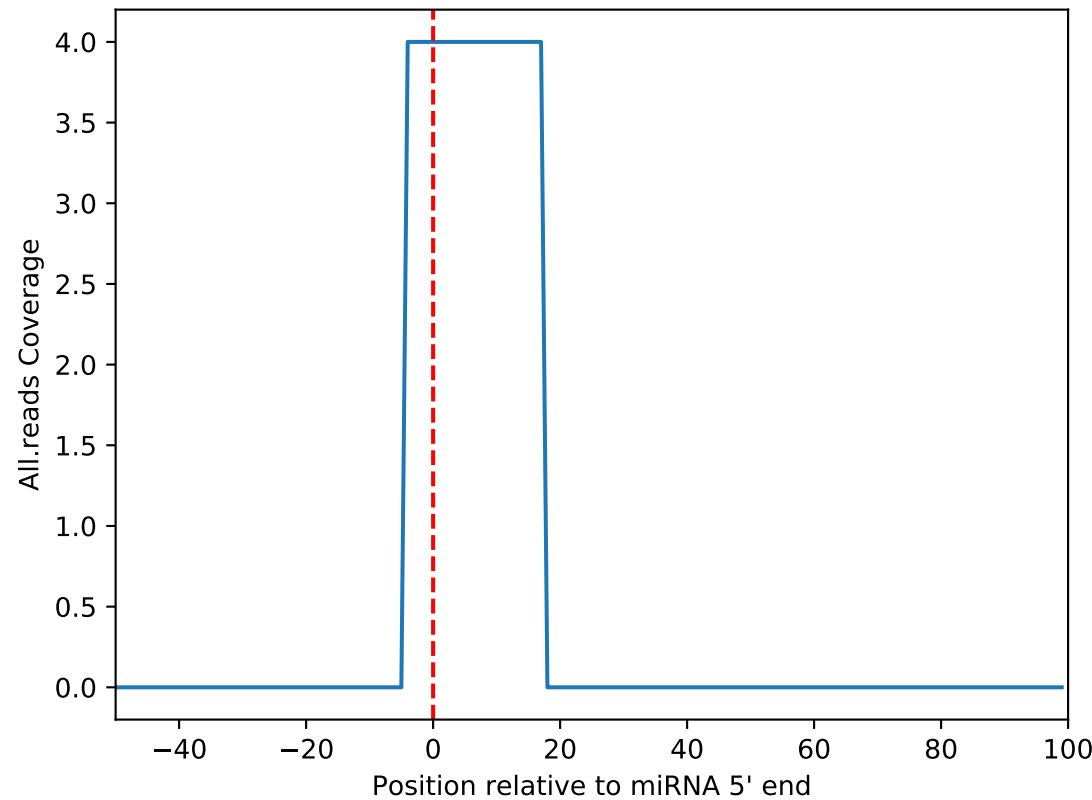

mir-9382 (chr2L:12724957(+))

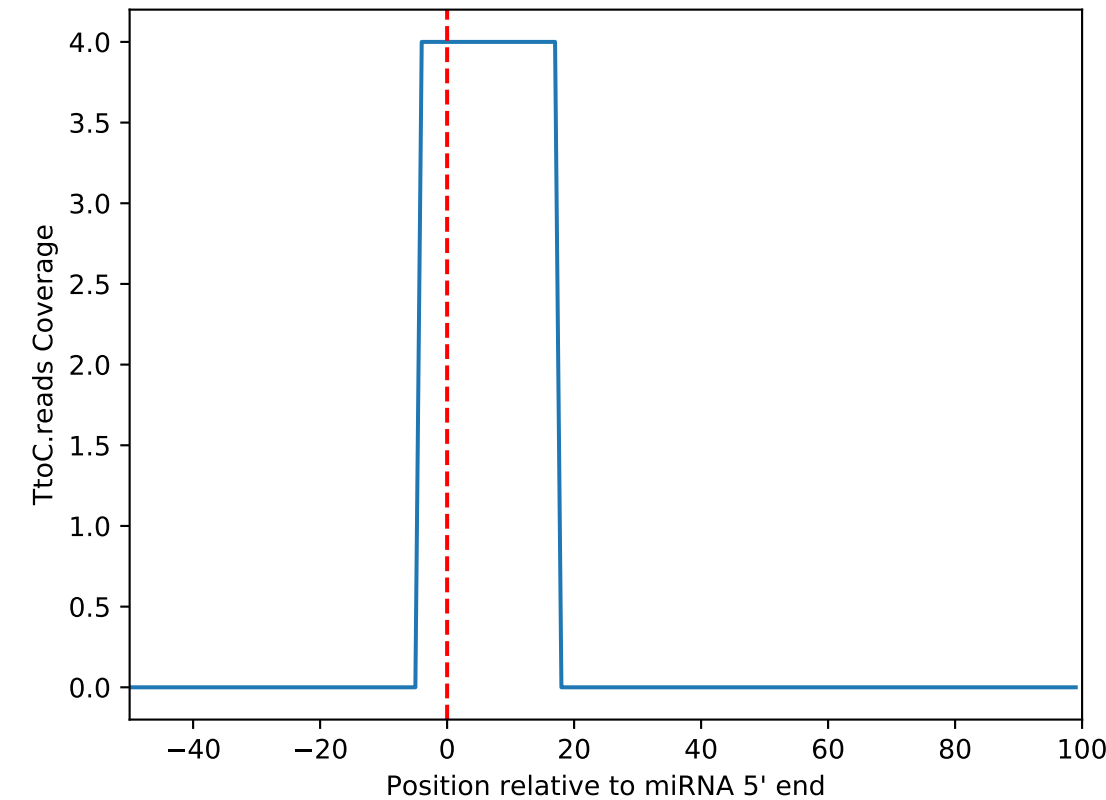

mir-9382 (chr2L:12724957(+))



mir-9382 (chr2L:12724957(+))

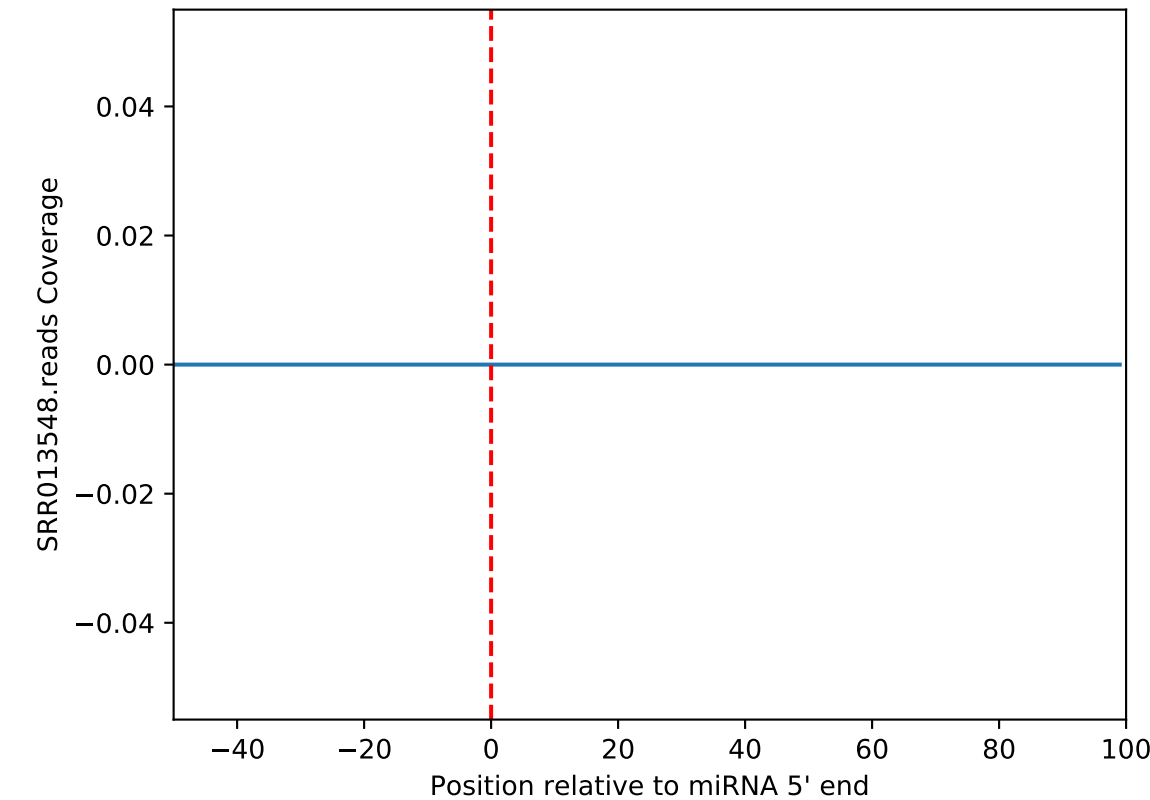

mir-2495 (chr2L:5068596(+))

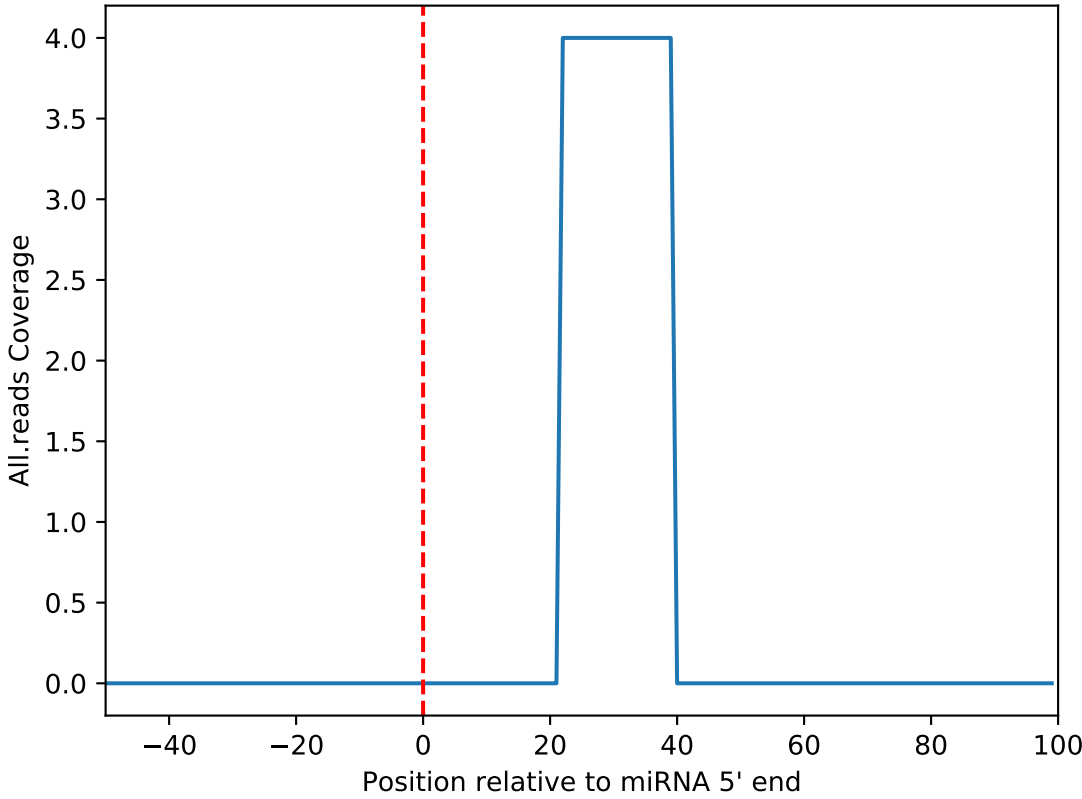

mir-2495 (chr2L:5068596(+))



mir-2495 (chr2L:5068596(+))



mir-2495 (chr2L:5068596(+))



mir-966 (chr2L:6045698(-))

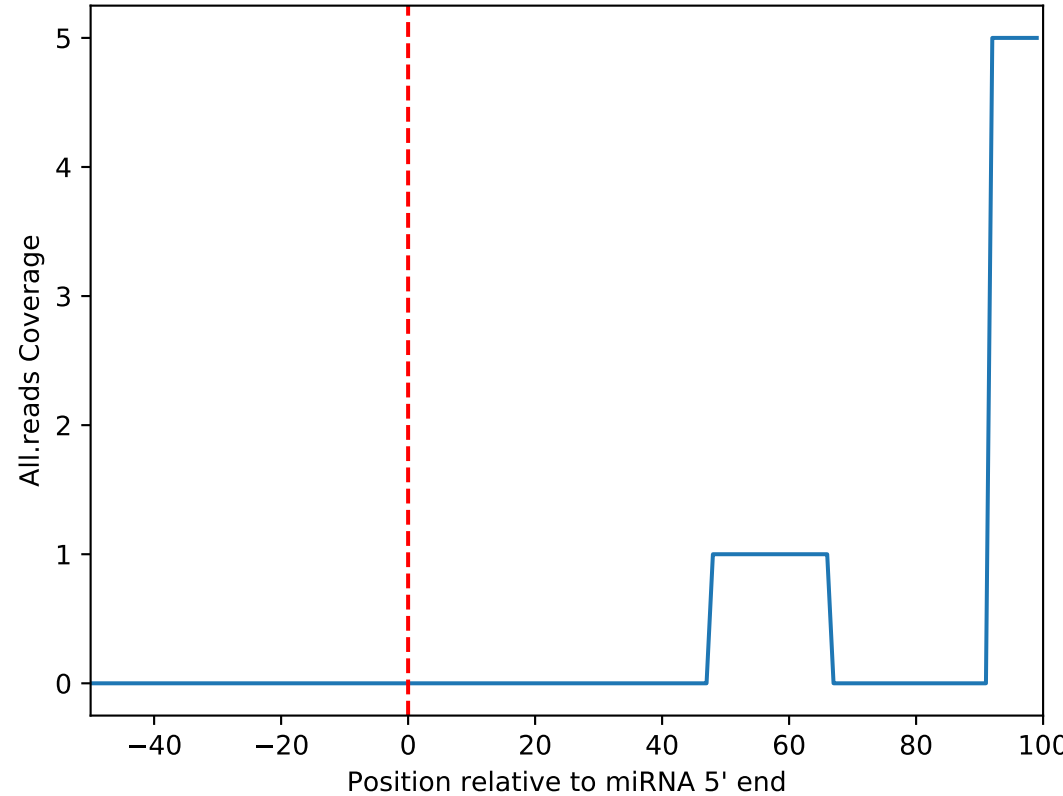

mir-966 (chr2L:6045698(-))

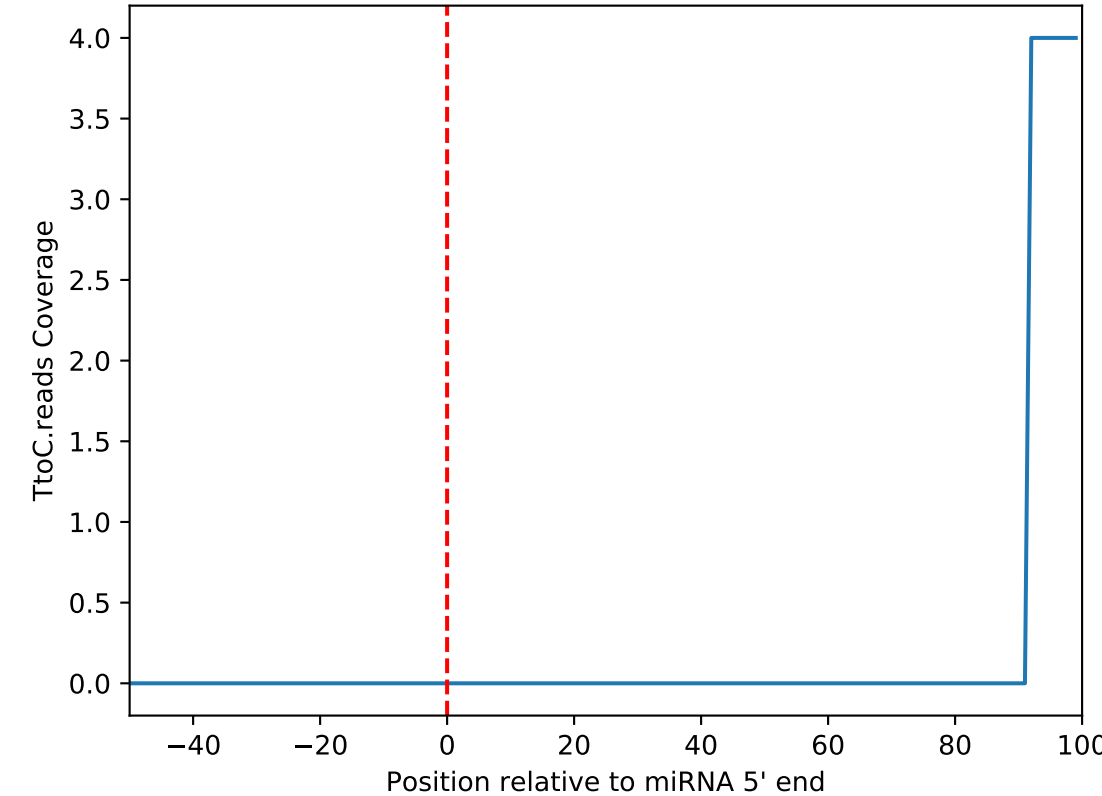

mir-966 (chr2L:6045698(-))

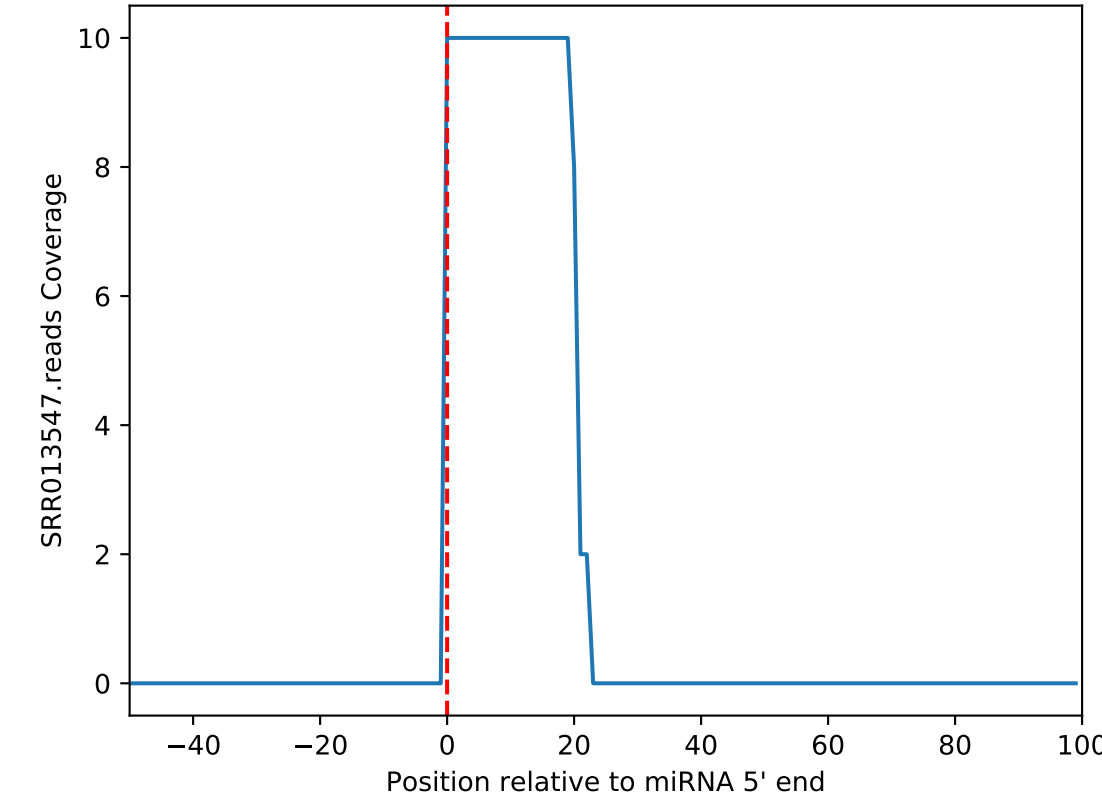

mir-966 (chr2L:6045698(-))

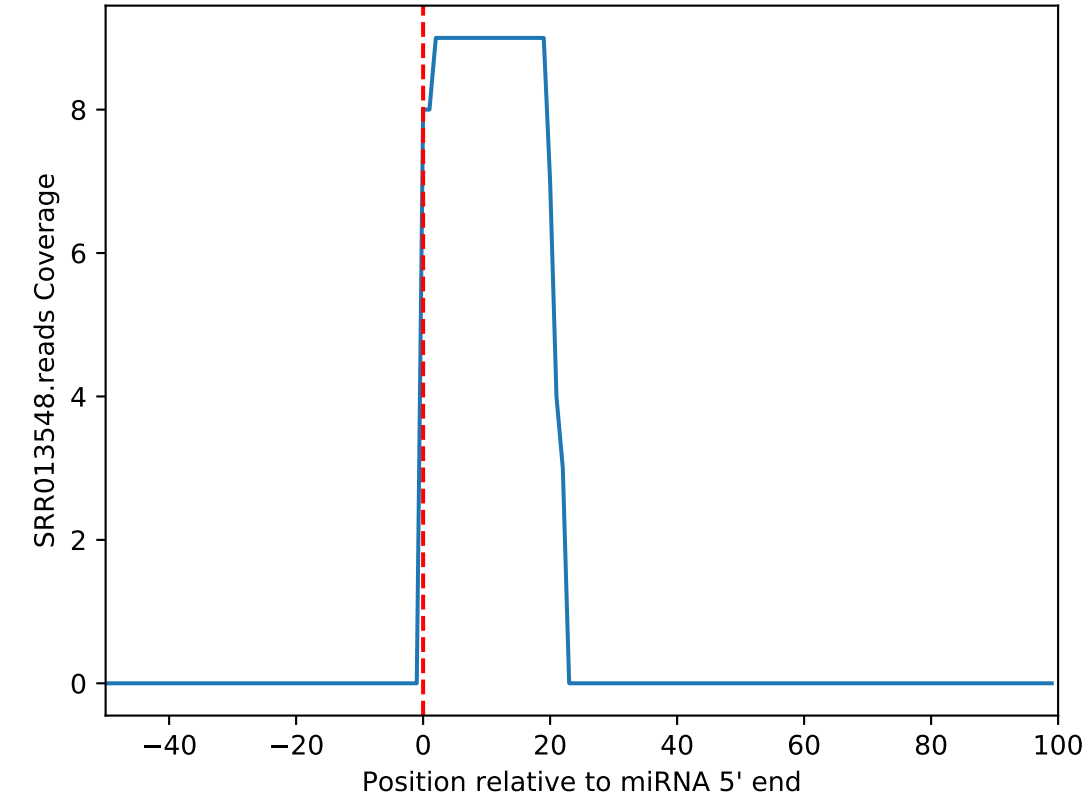

mir-2494 (chr3R:16618788(+))

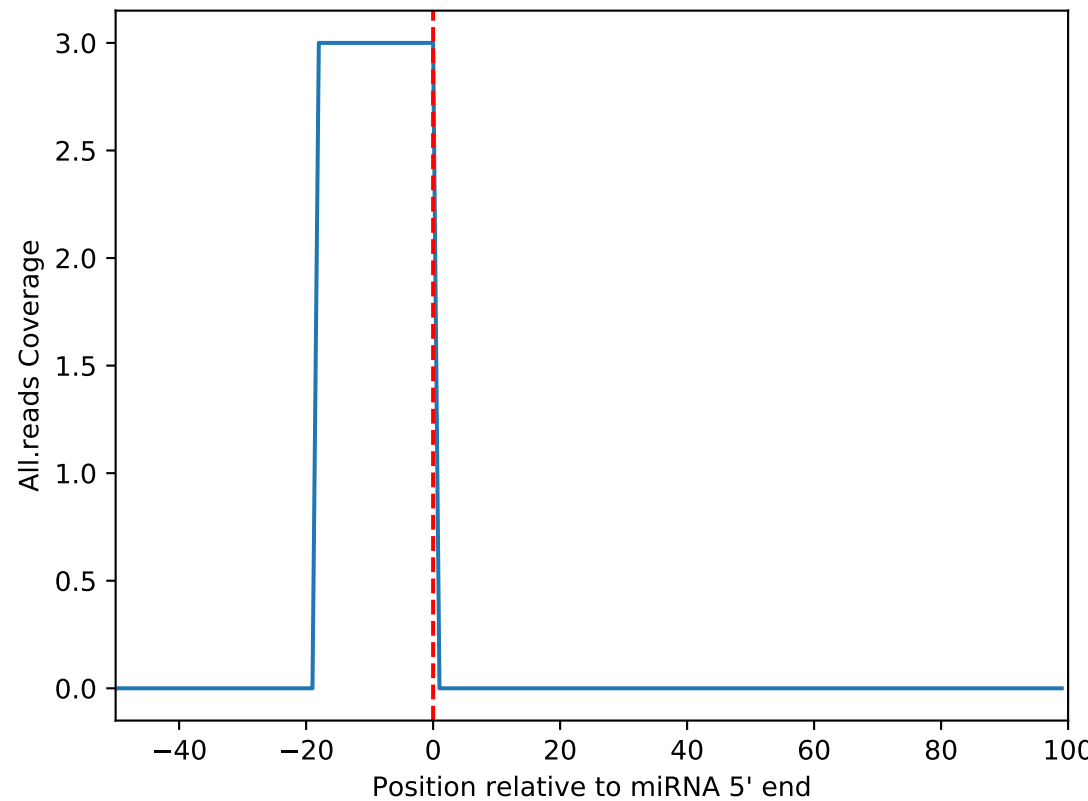

mir-2494 (chr3R:16618788(+))



mir-2494 (chr3R:16618788(+))

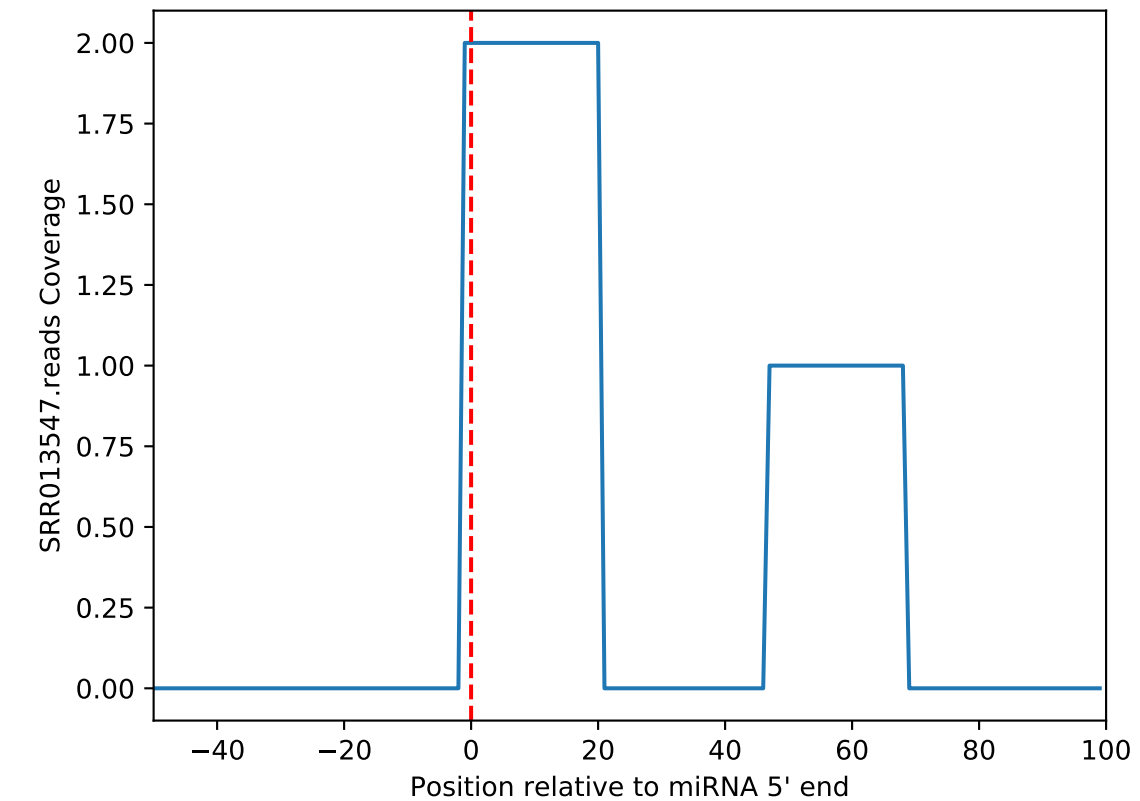

mir-2494 (chr3R:16618788(+))

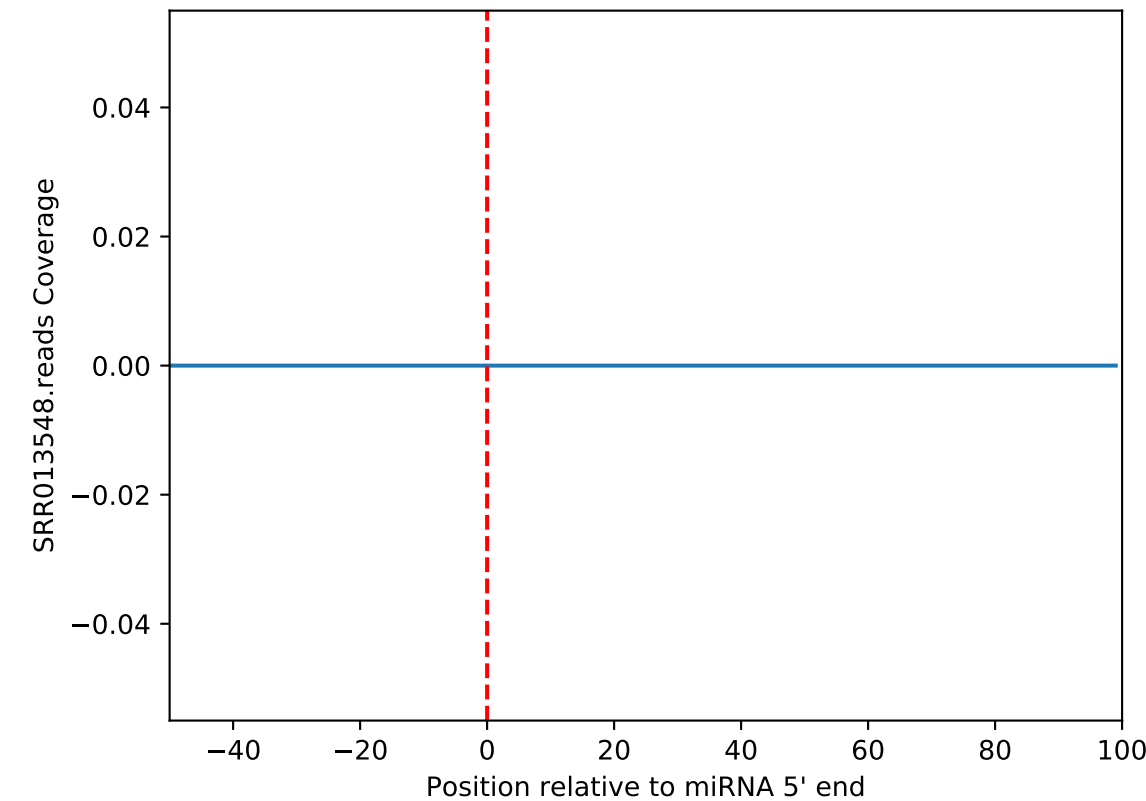

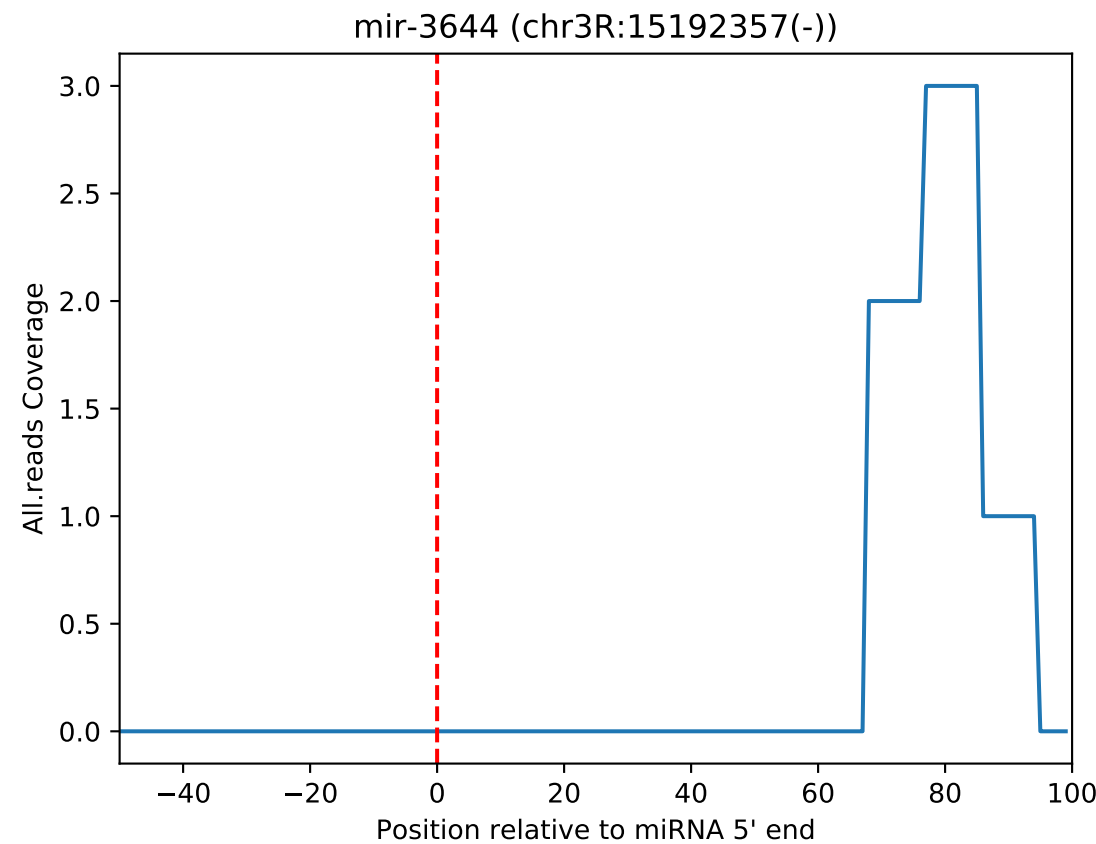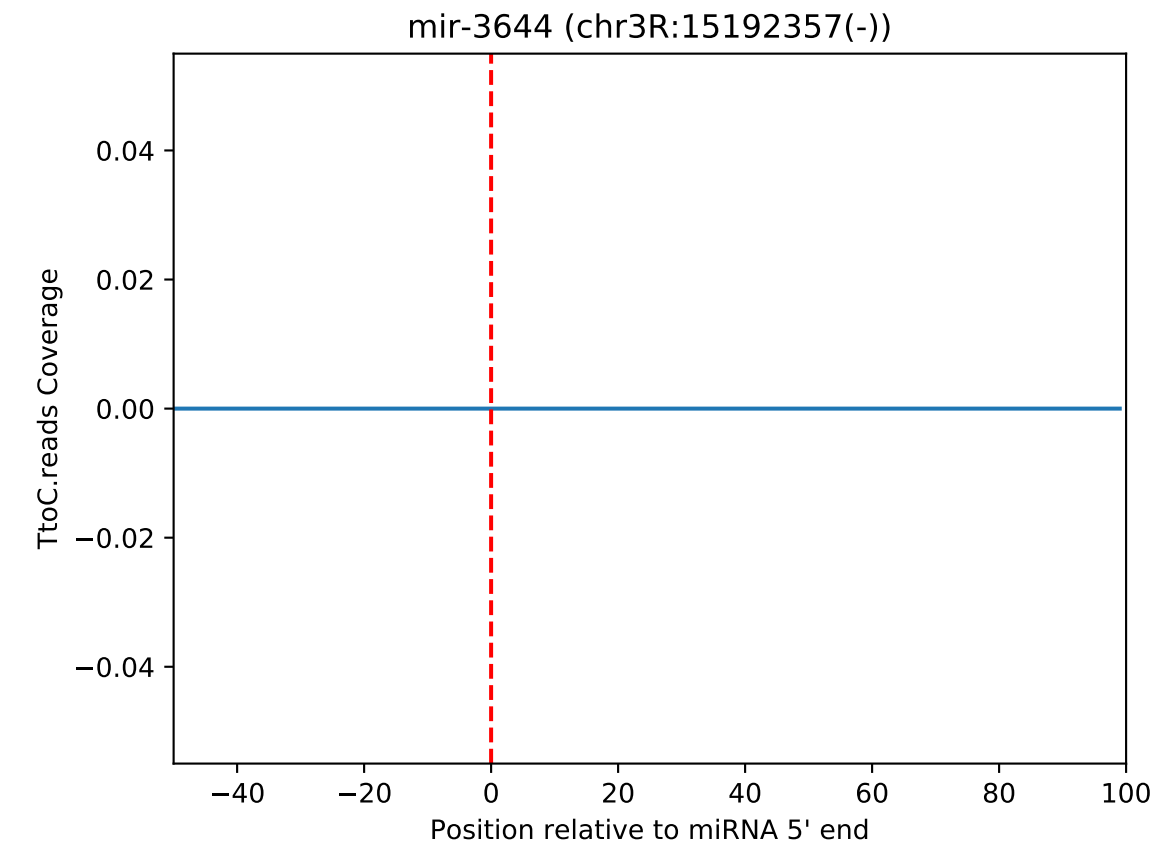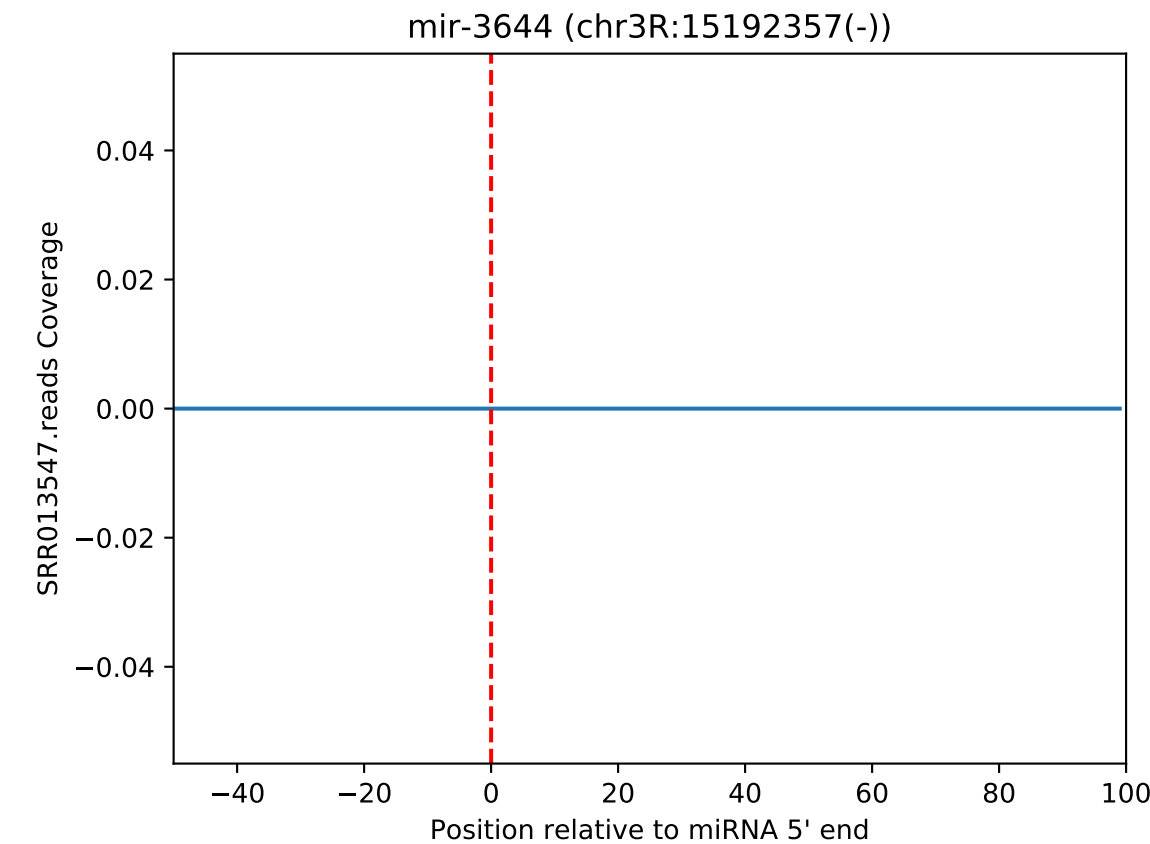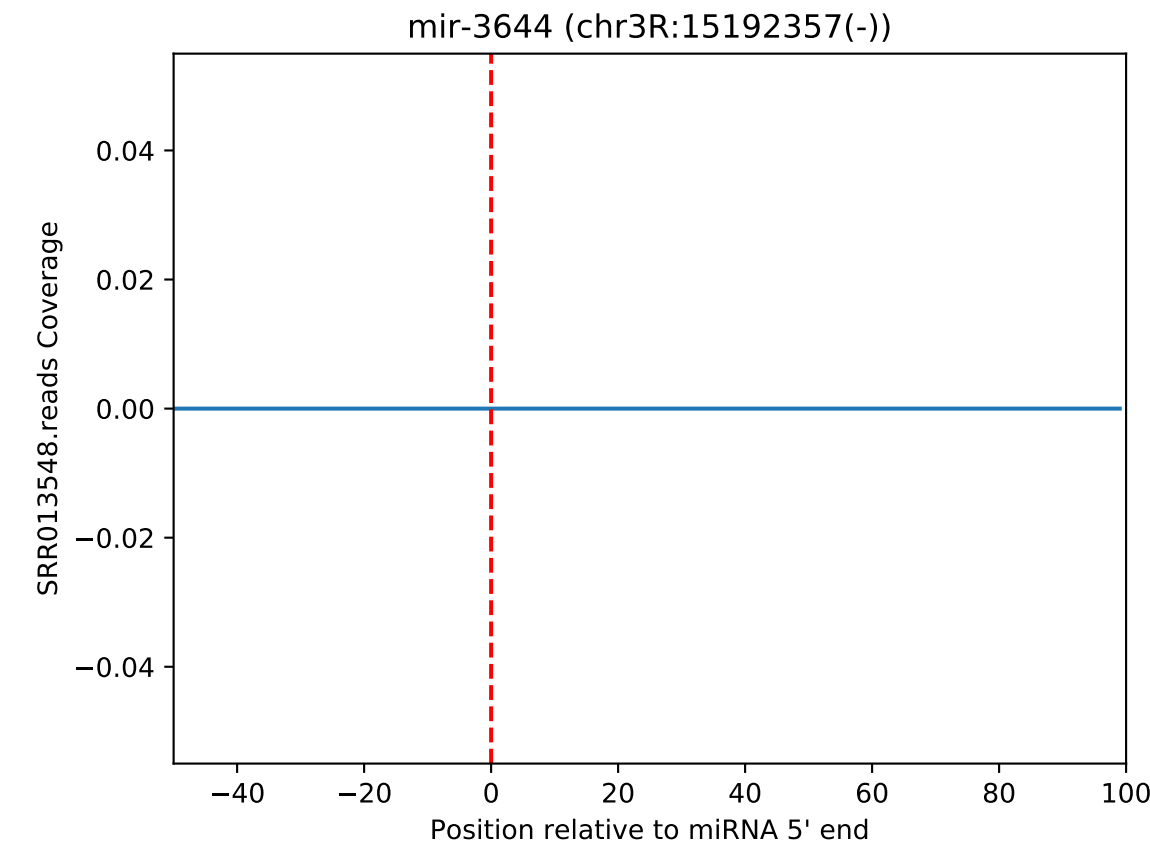

mir-968 (chr2L:13747824(-))

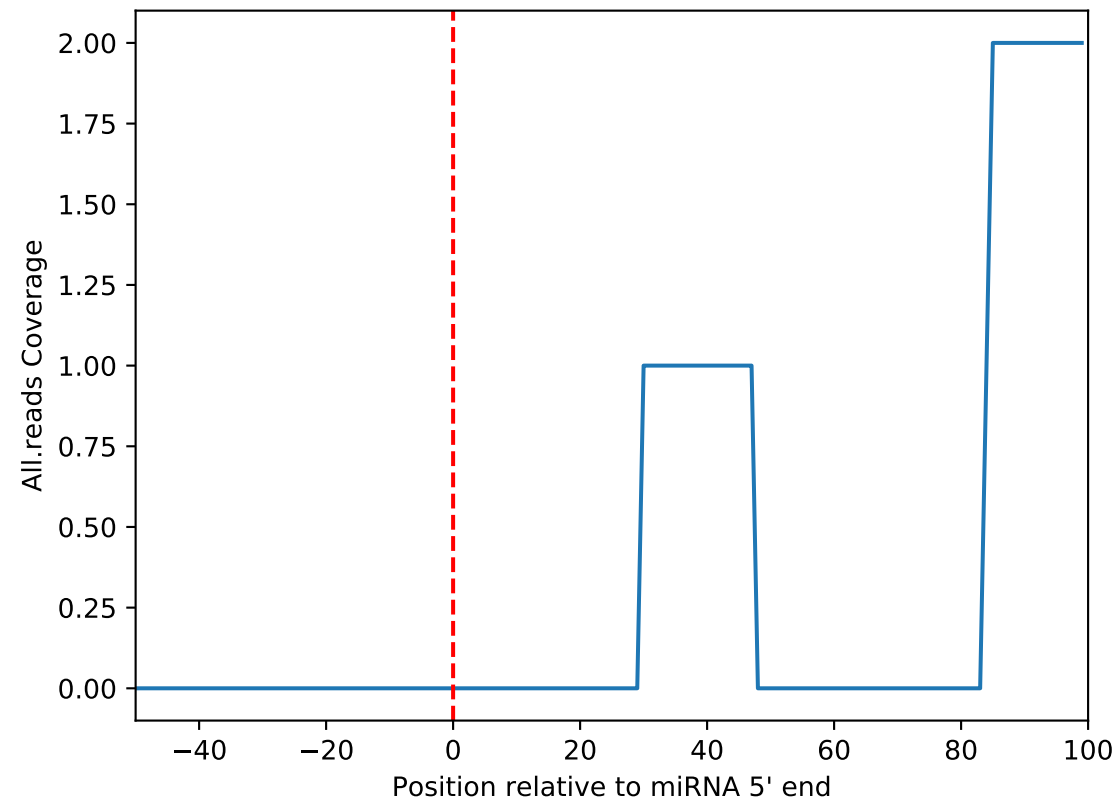

mir-968 (chr2L:13747824(-))



mir-968 (chr2L:13747824(-))



mir-968 (chr2L:13747824(-))

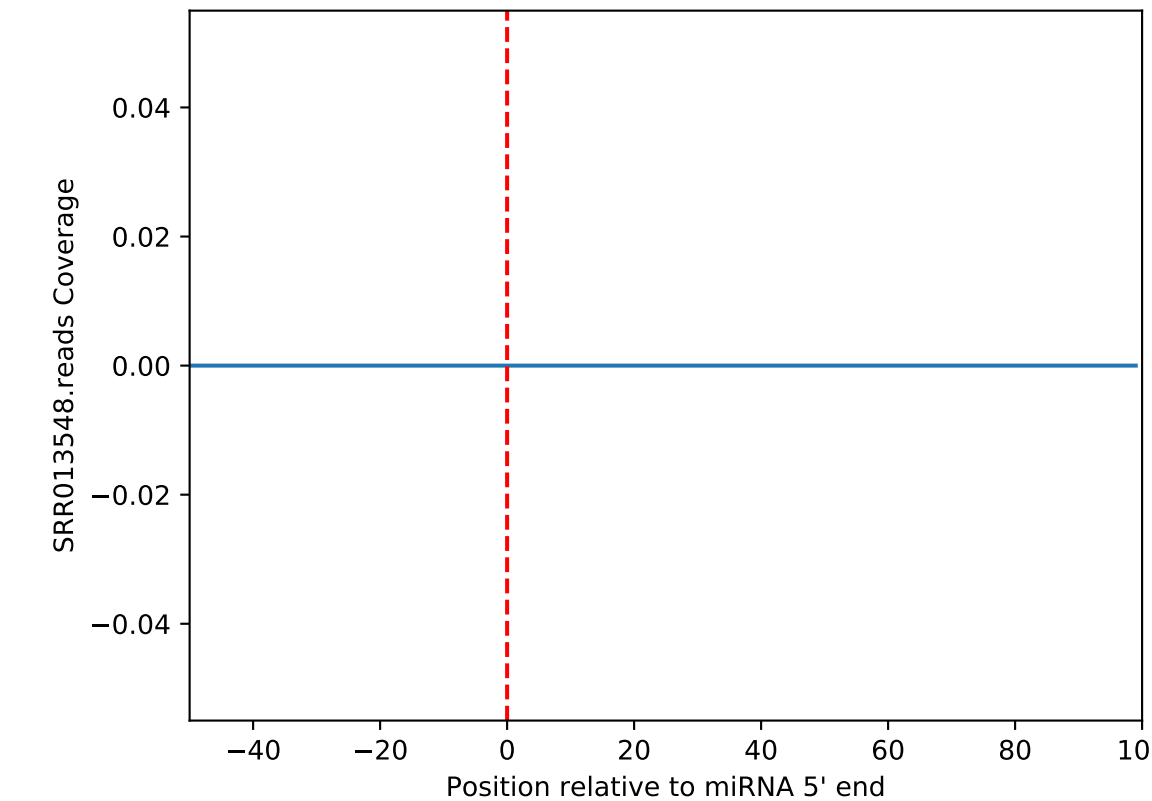



mir-4973 (chr2L:20562305(+))

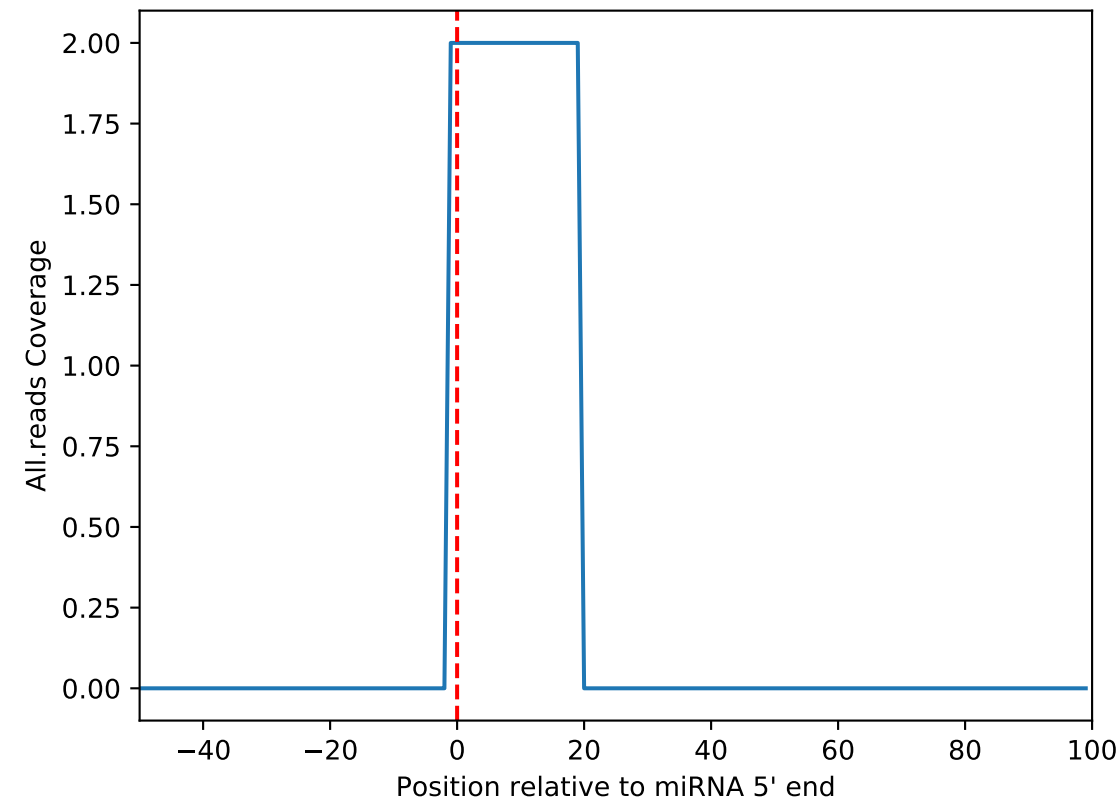

mir-4973 (chr2L:20562305(+))



mir-4973 (chr2L:20562305(+))

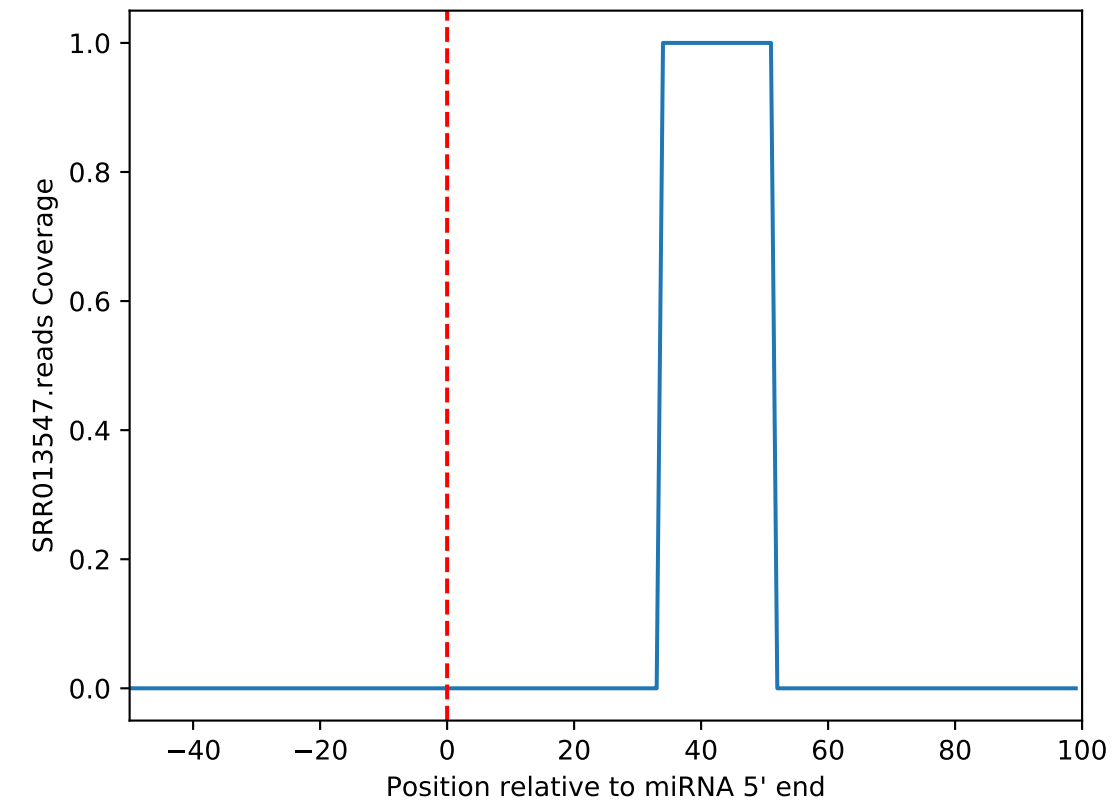

mir-4973 (chr2L:20562305(+))



mir-9373 (chr3R:19621138(-))

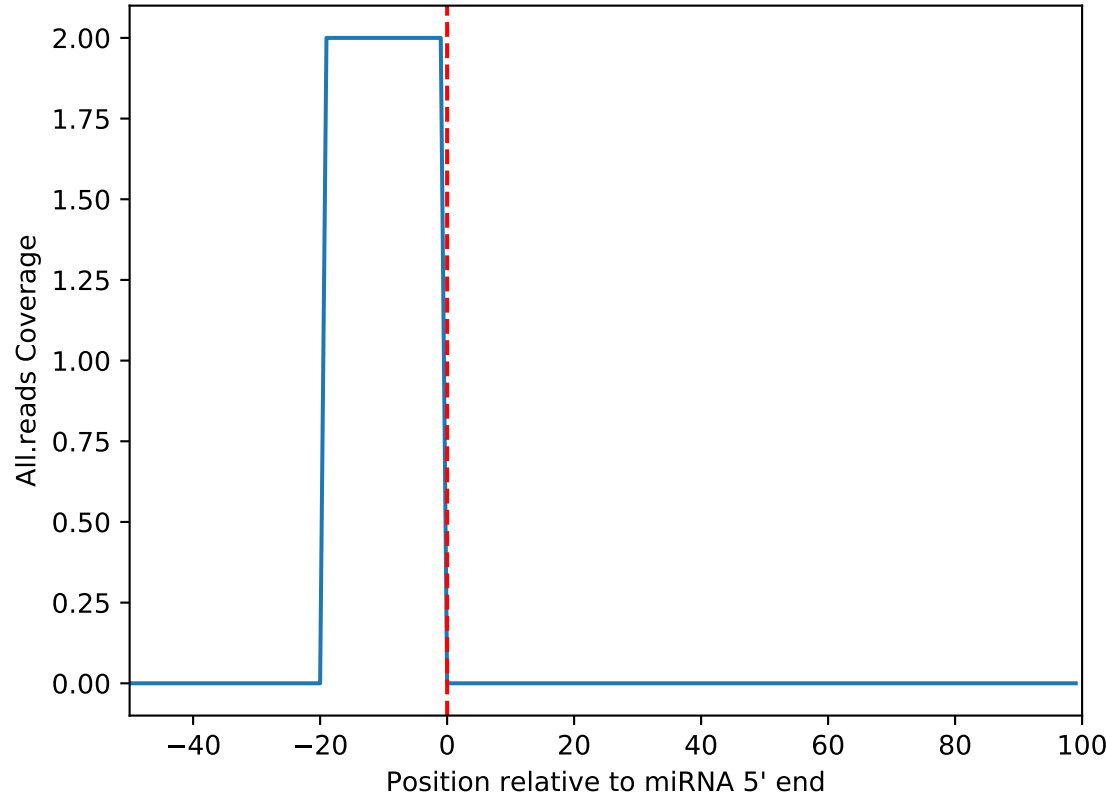

mir-9373 (chr3R:19621138(-))

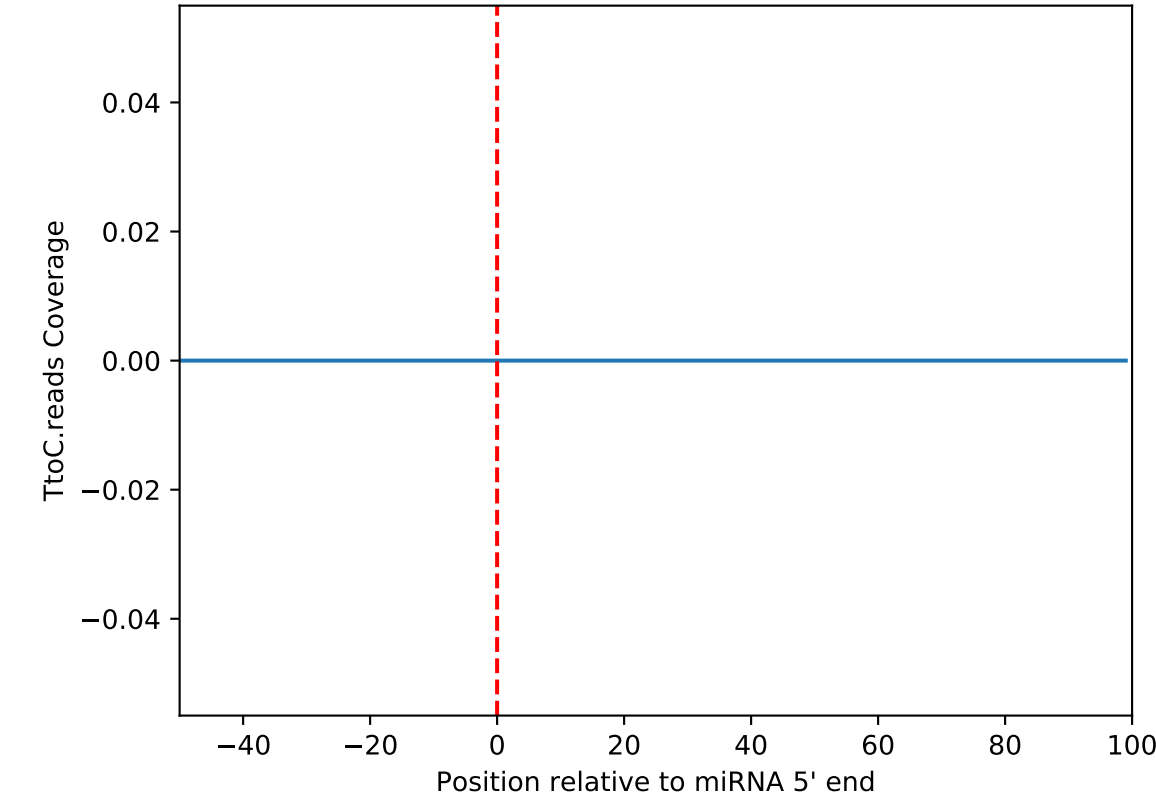

mir-9373 (chr3R:19621138(-))

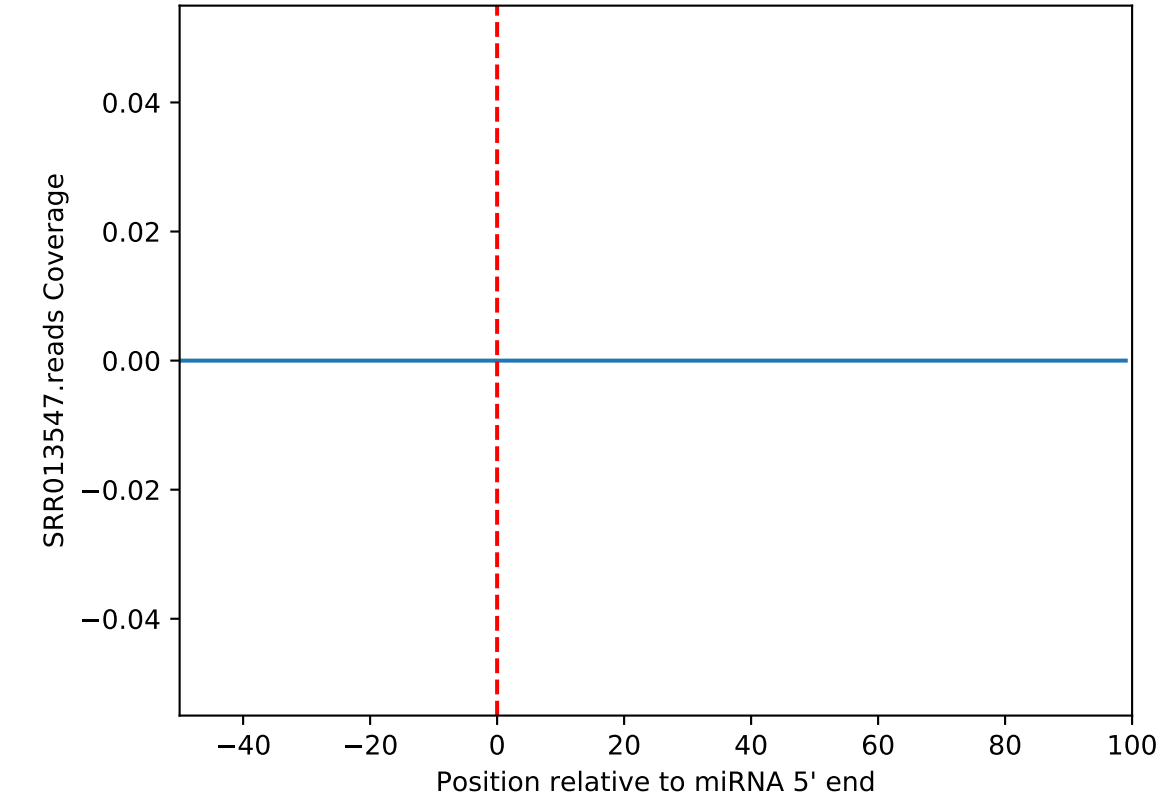

mir-9373 (chr3R:19621138(-))

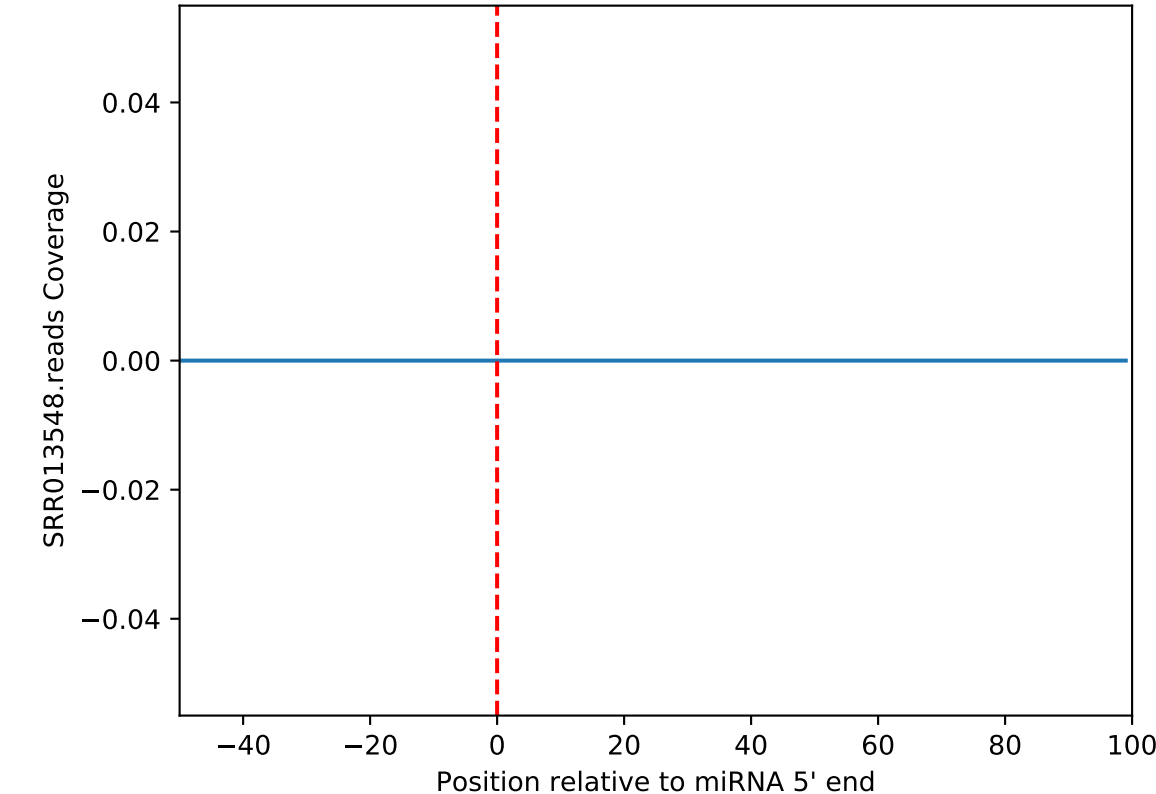

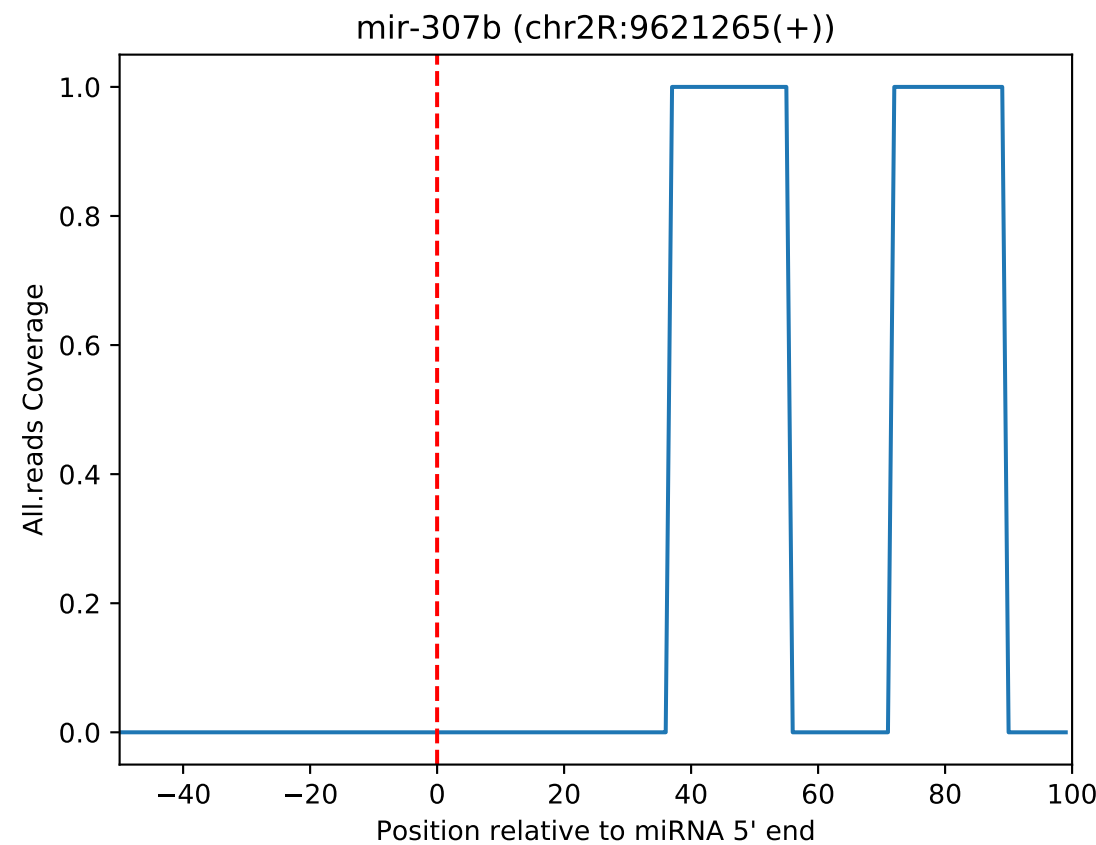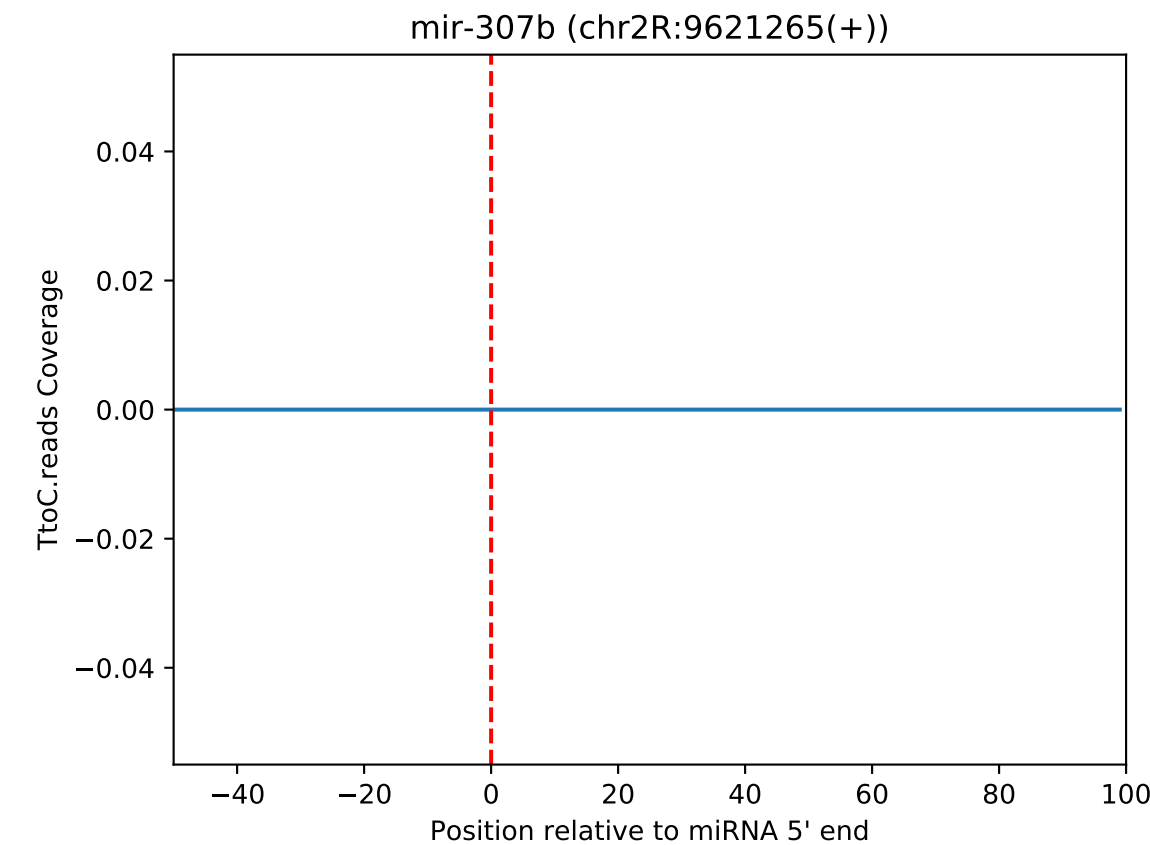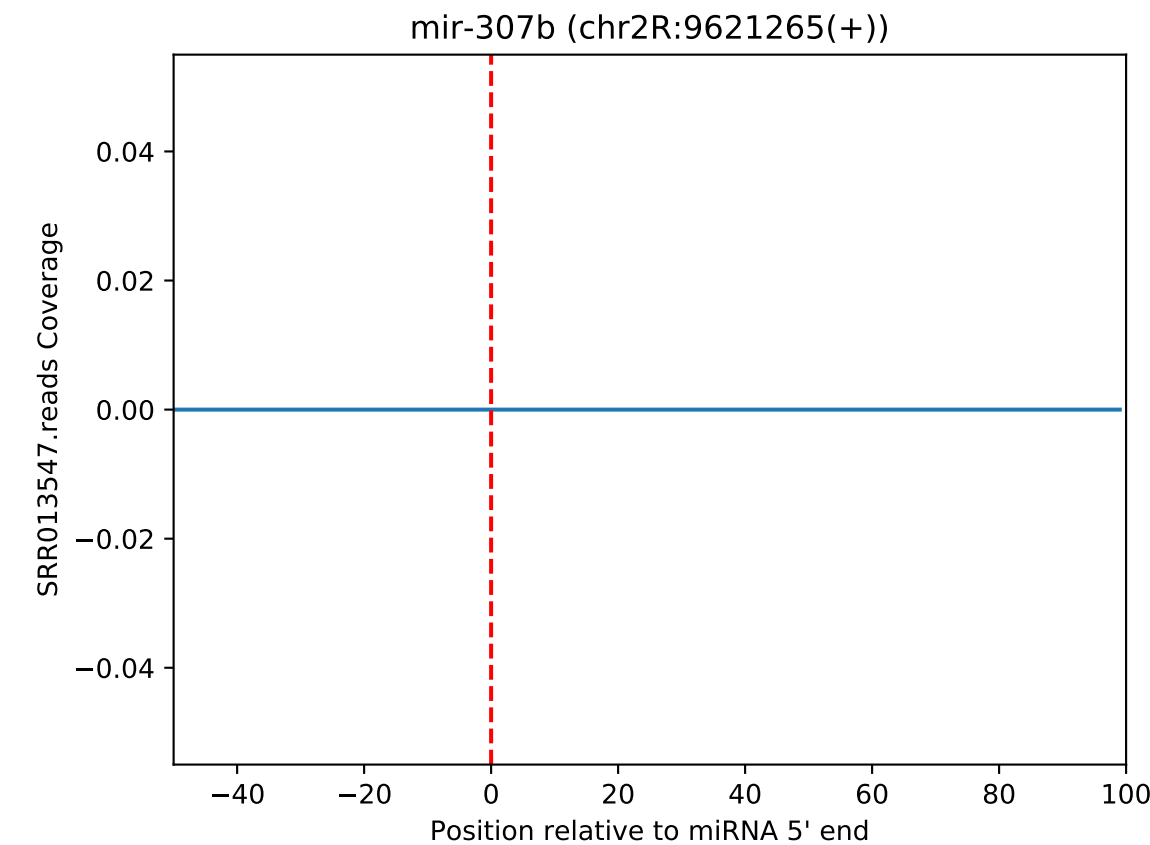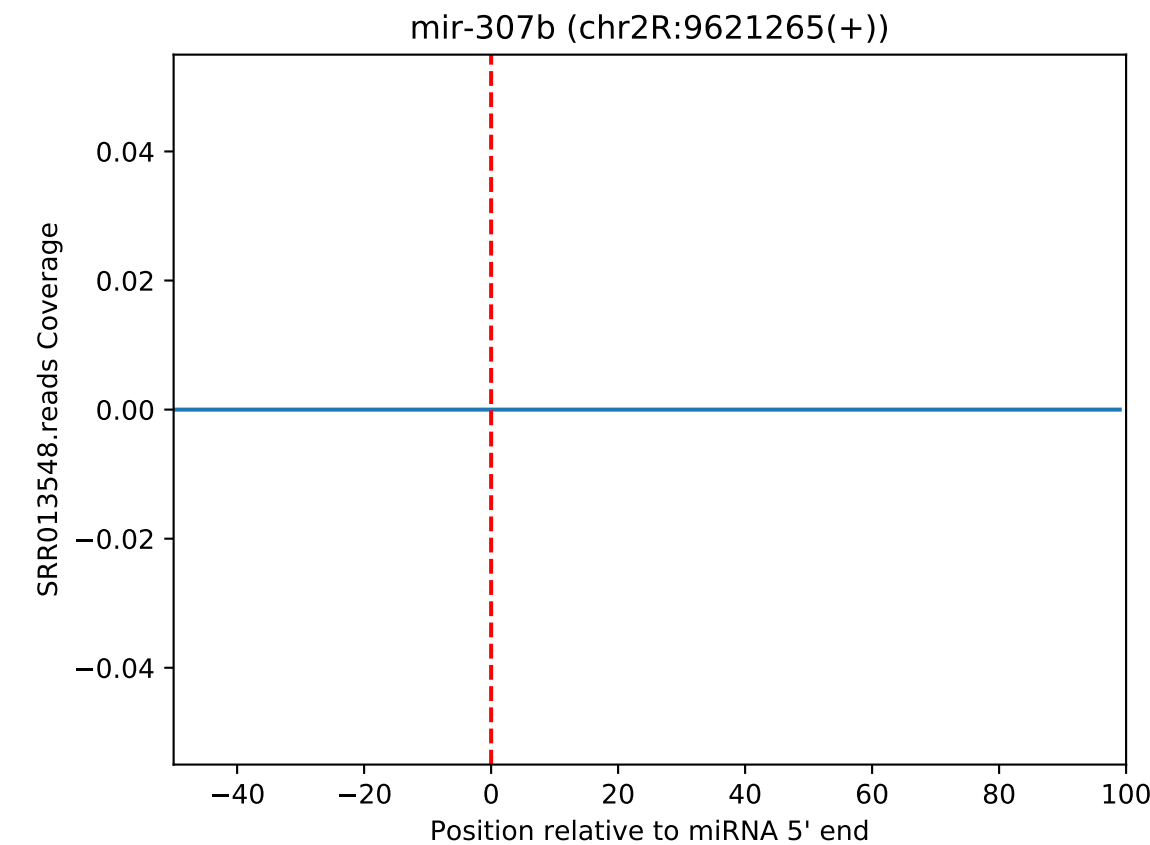

mir-318 (chr3R:10408308(+))

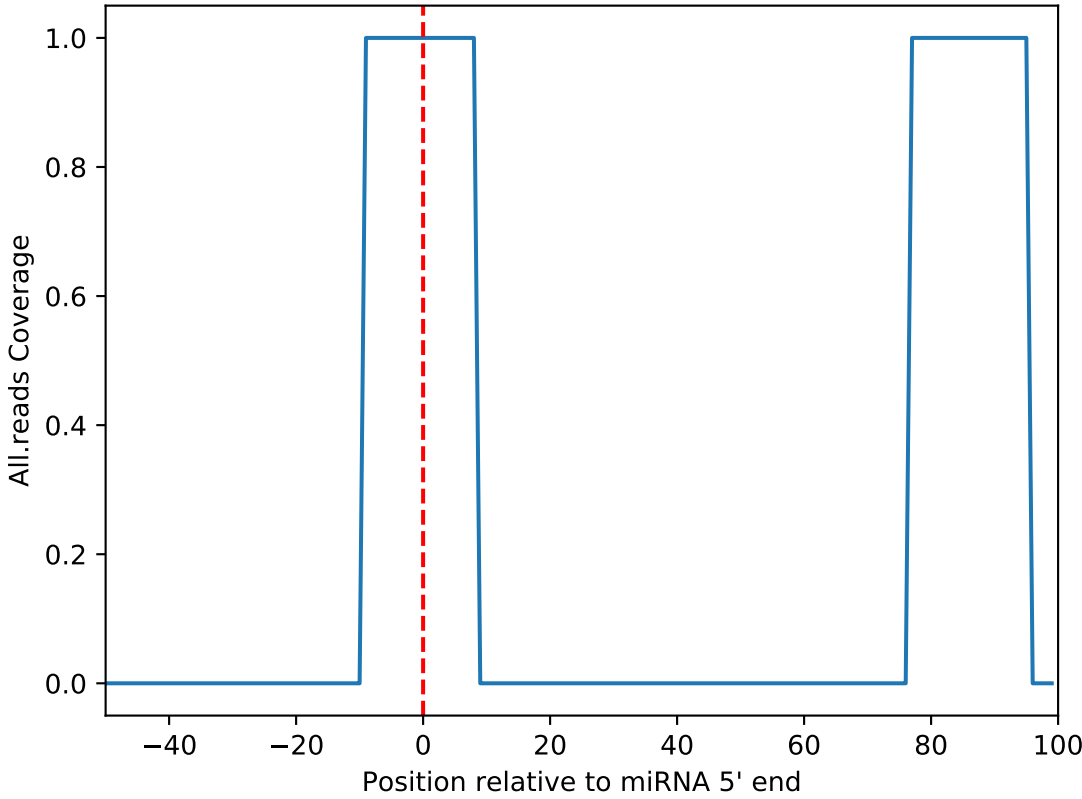

mir-318 (chr3R:10408308(+))



mir-318 (chr3R:10408308(+))

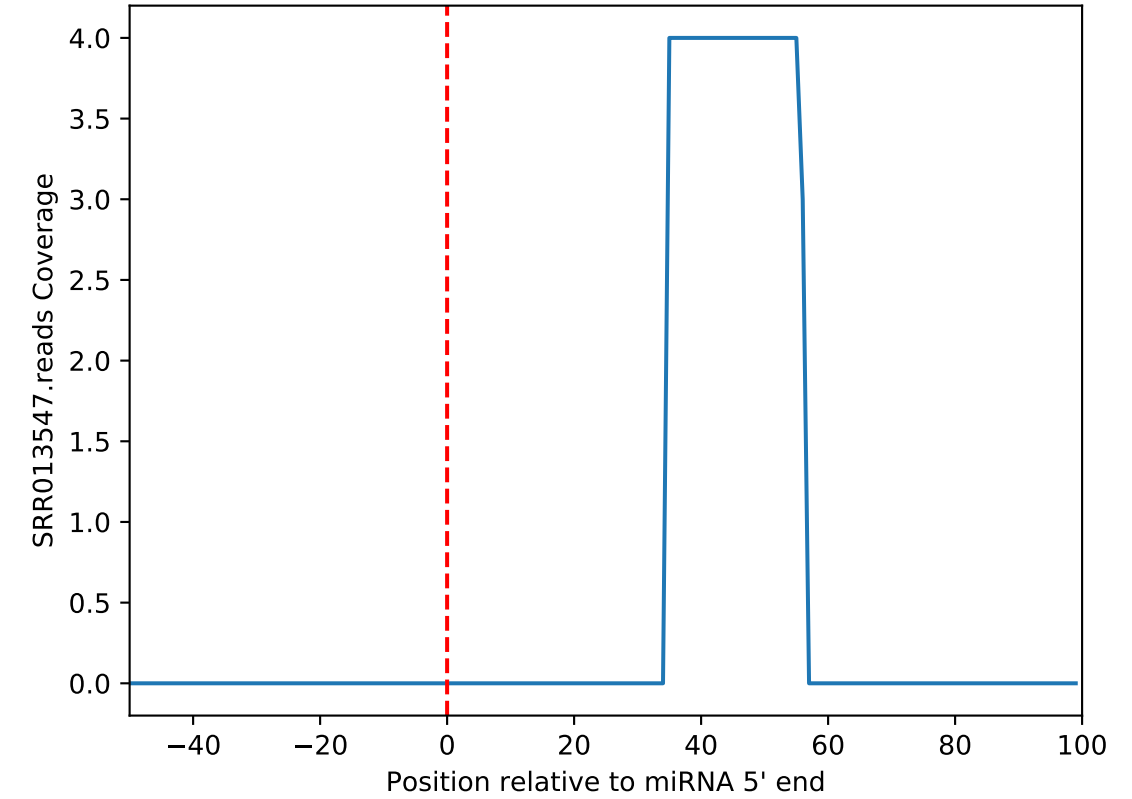

mir-318 (chr3R:10408308(+))

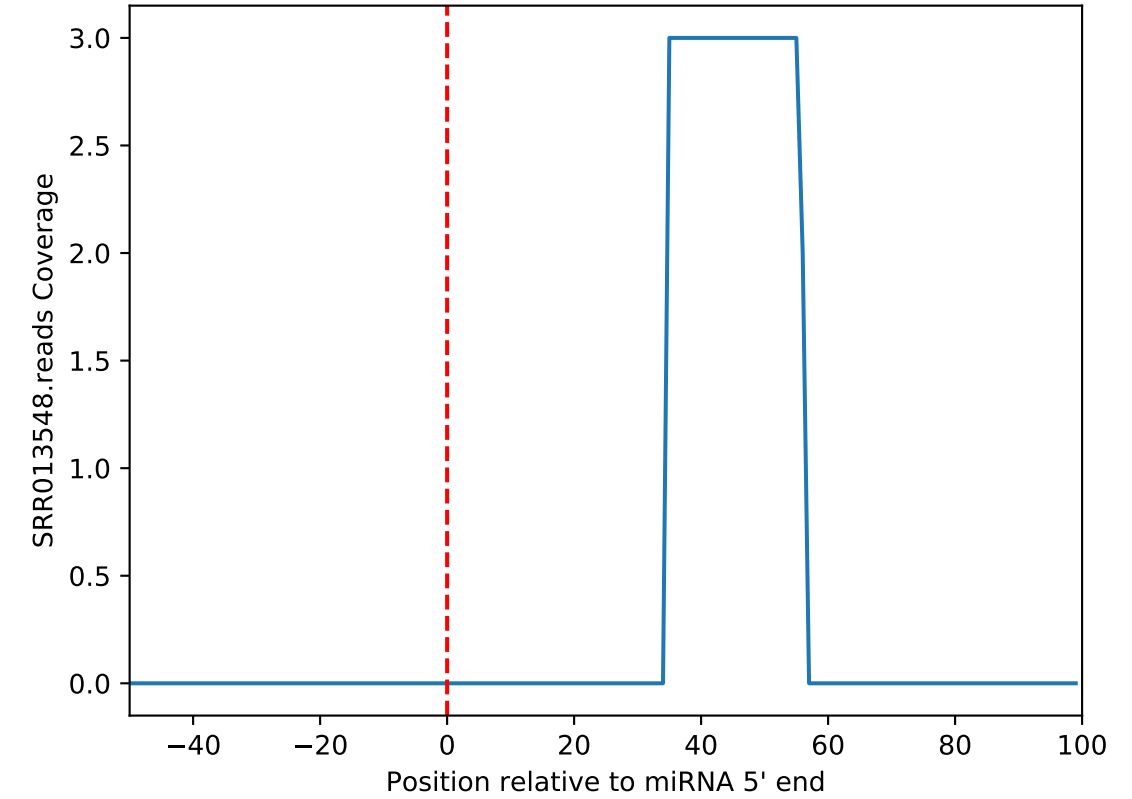

mir-4955 (chrX:2544881(-))

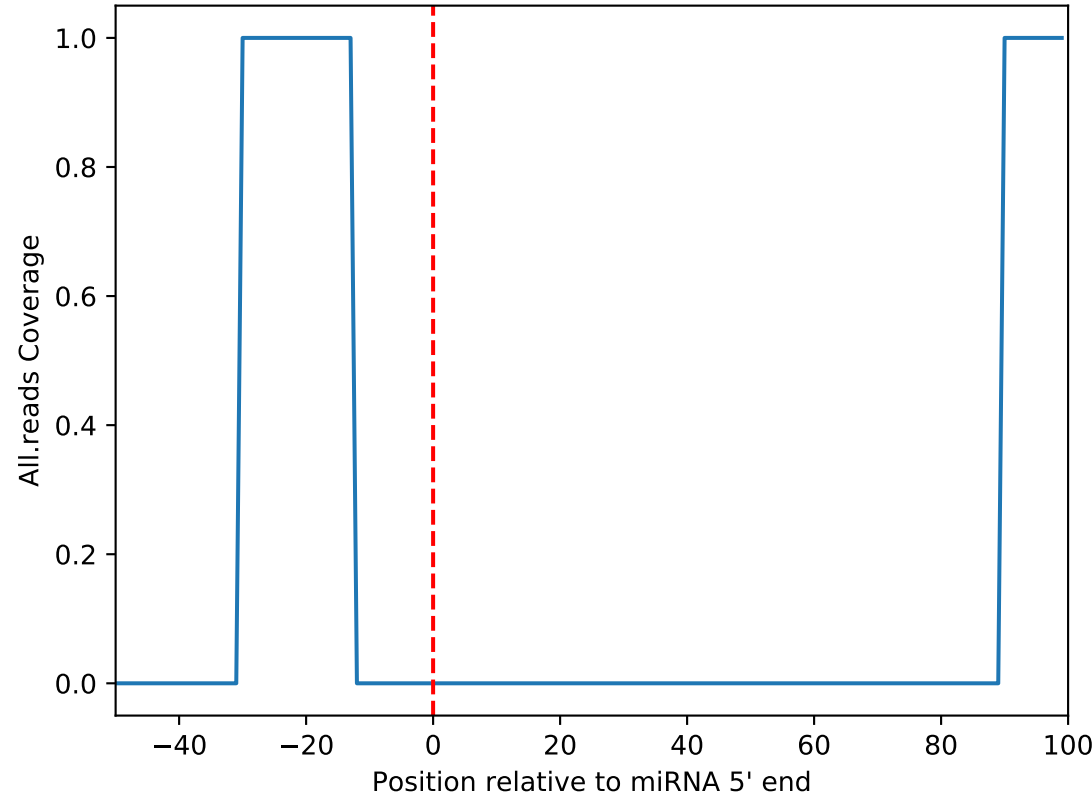

mir-4955 (chrX:2544881(-))



mir-4955 (chrX:2544881(-))



mir-4955 (chrX:2544881(-))

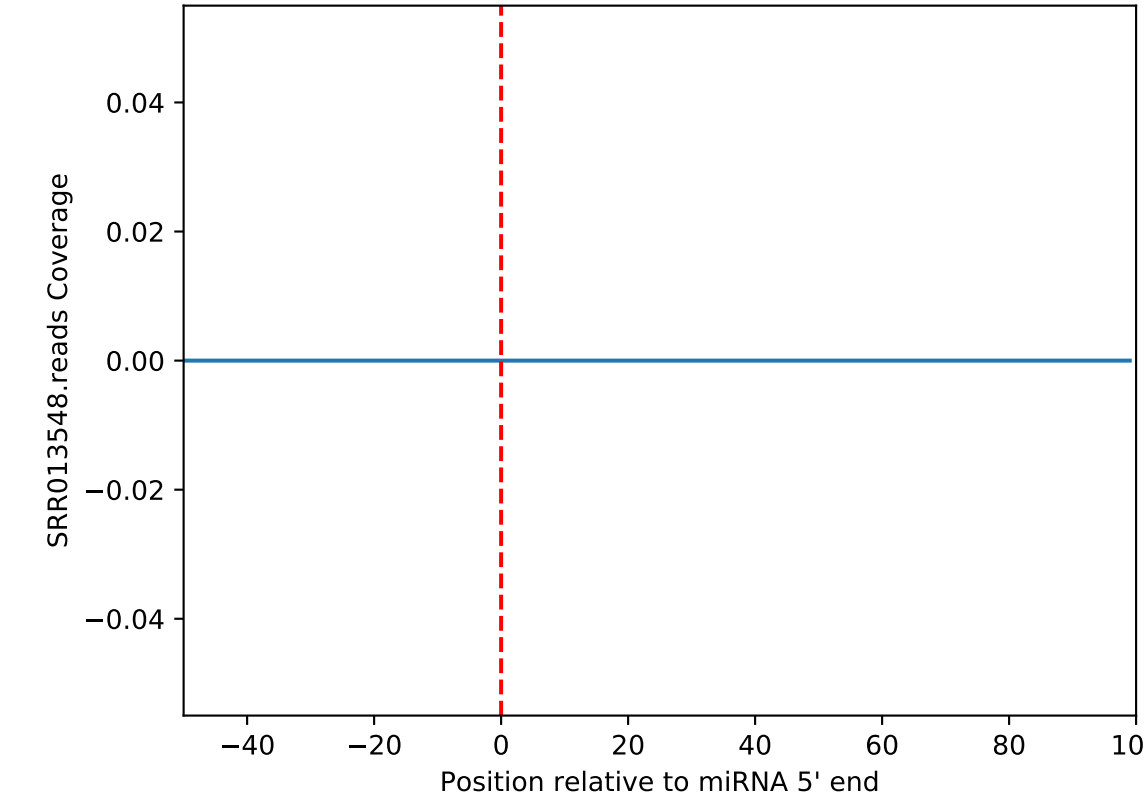

mir-1002 (chr2L:13747683(-))

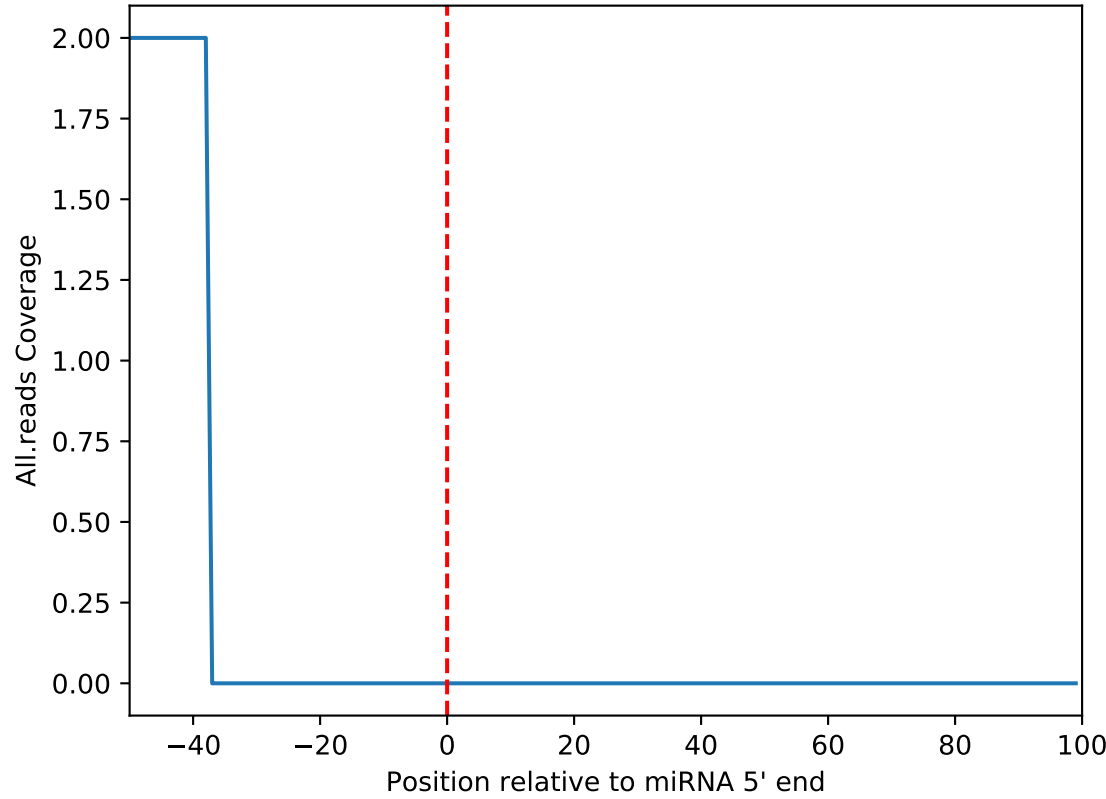

mir-1002 (chr2L:13747683(-))



mir-1002 (chr2L:13747683(-))



mir-1002 (chr2L:13747683(-))



mir-9376 (chr2R:22946867(+))

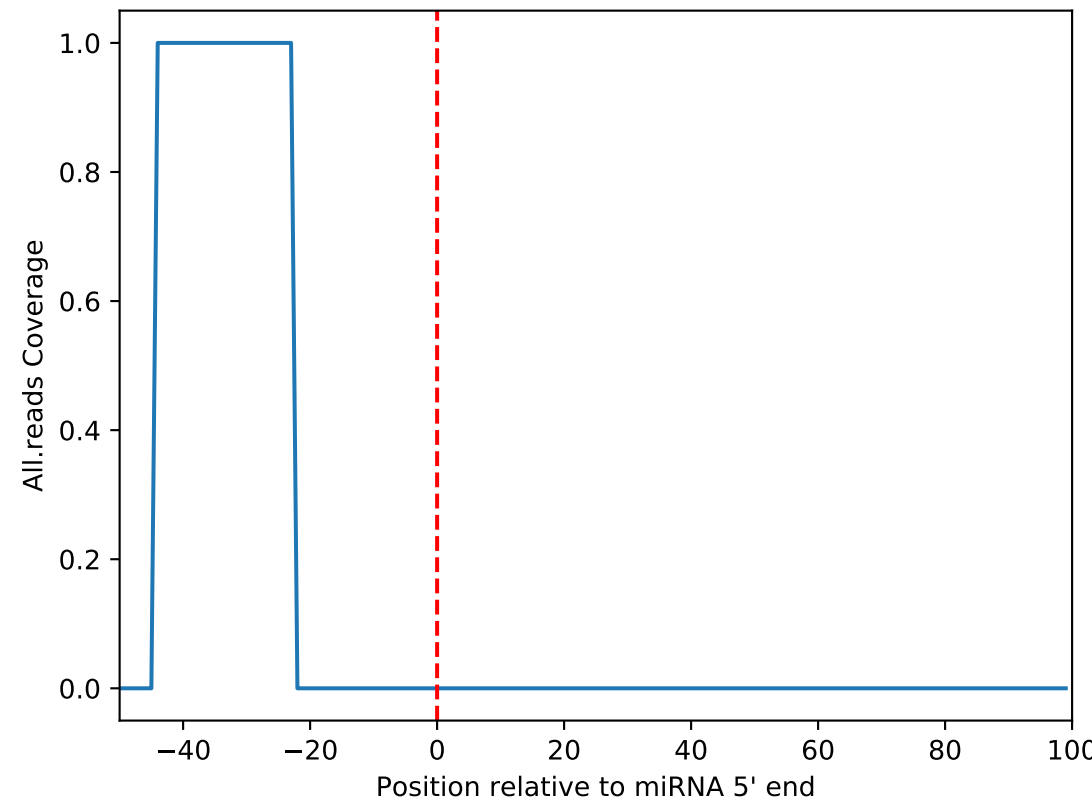

mir-9376 (chr2R:22946867(+))



mir-9376 (chr2R:22946867(+))



mir-9376 (chr2R:22946867(+))

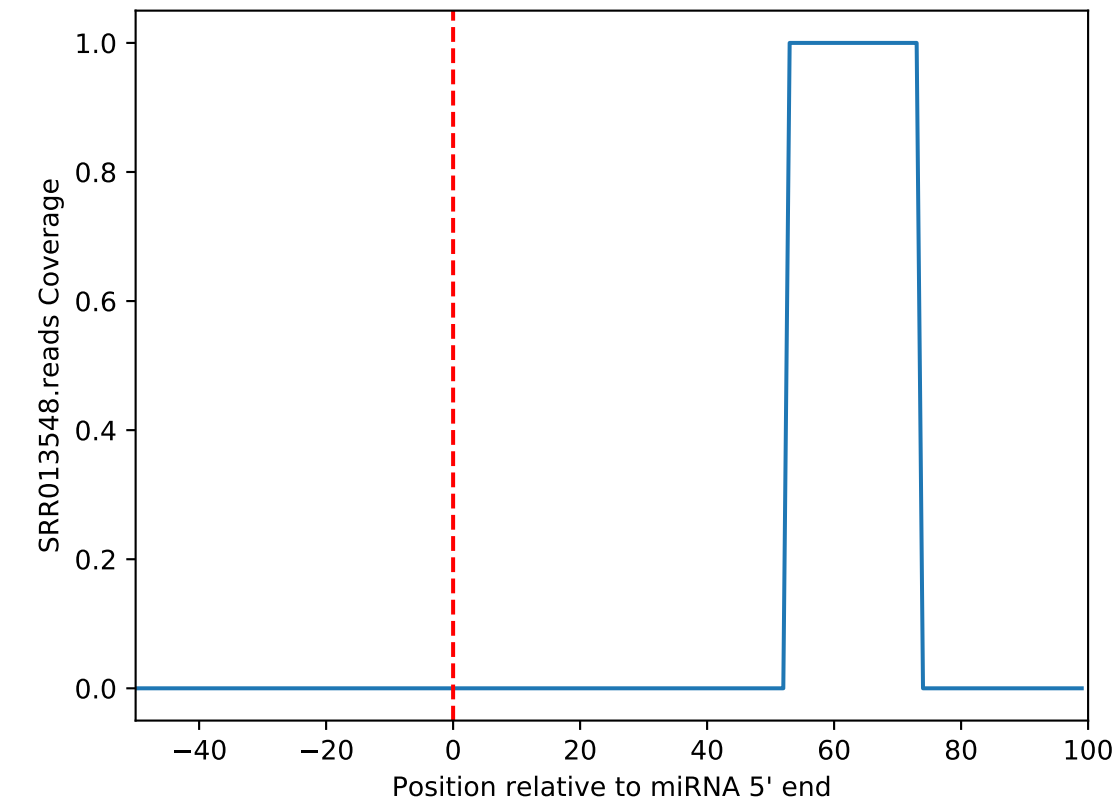

mir-9384 (chr3R:4748723(-))

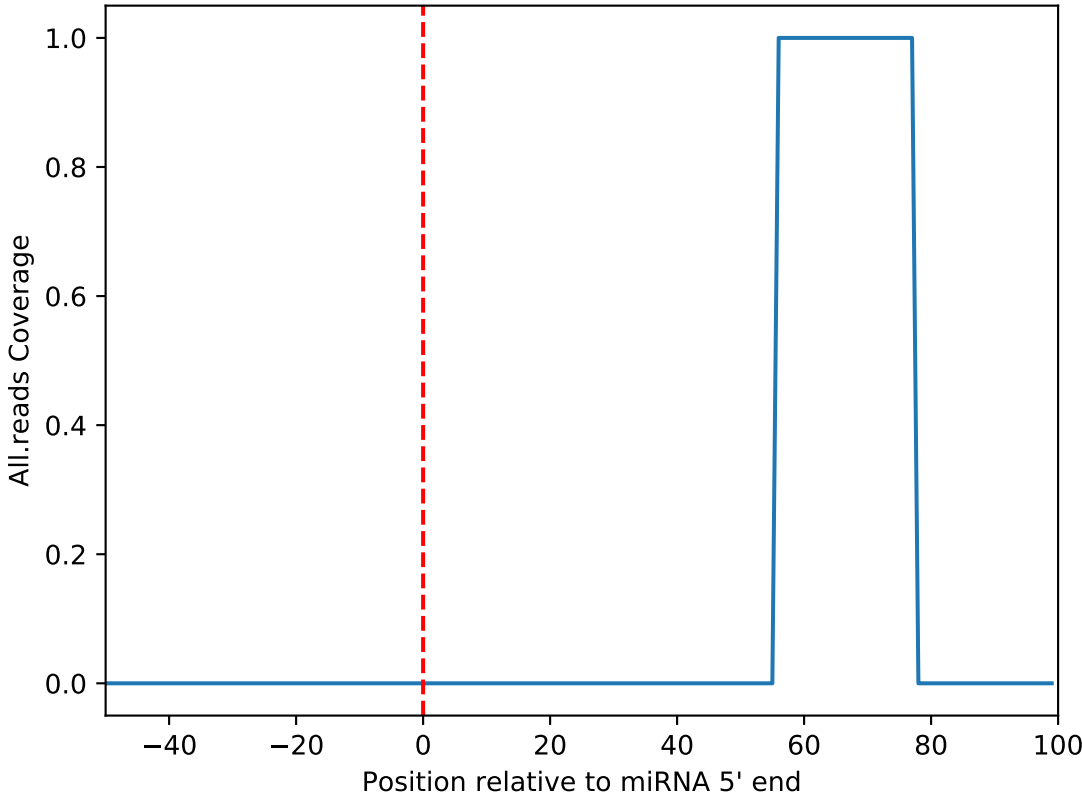

mir-9384 (chr3R:4748723(-))

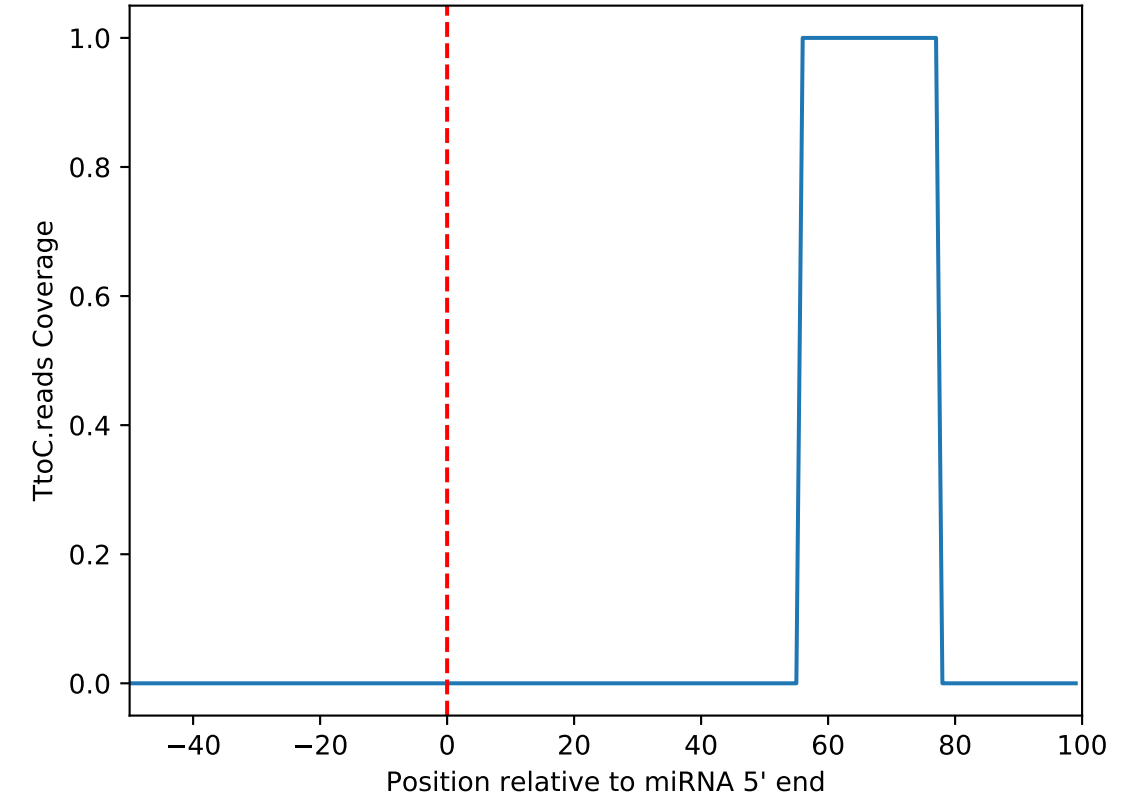

mir-9384 (chr3R:4748723(-))



mir-9384 (chr3R:4748723(-))





mir-iab-4 (chr3R:16856281(+))

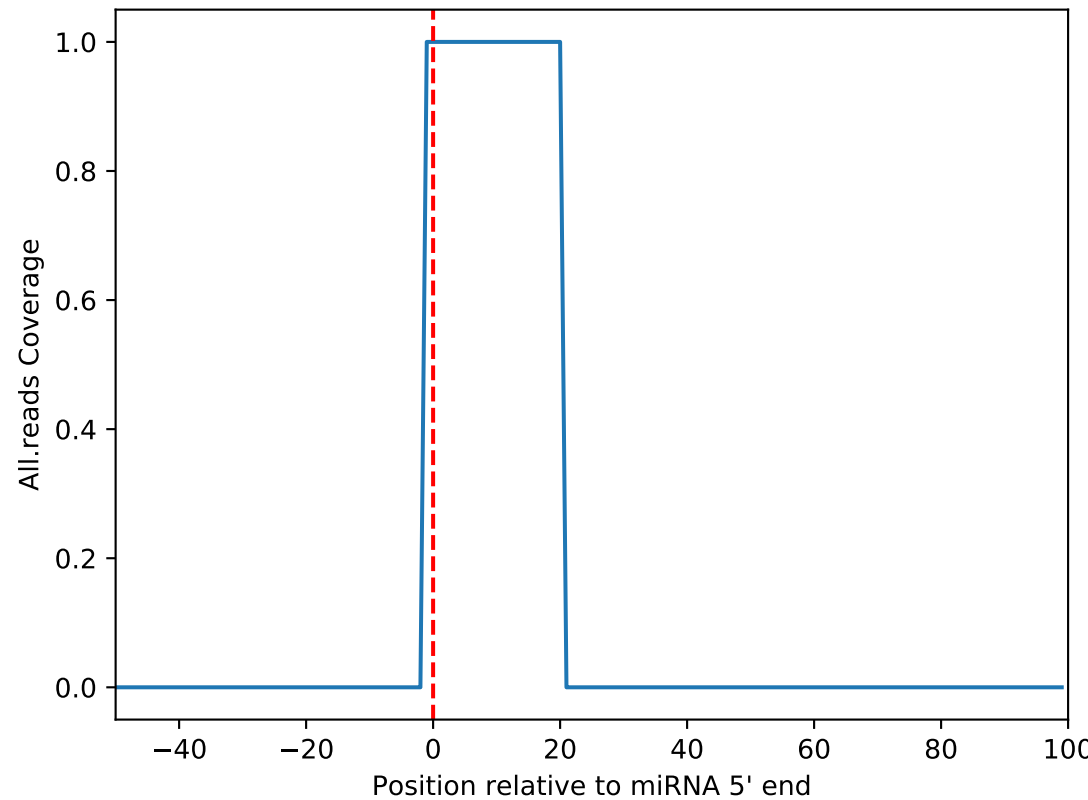

mir-iab-4 (chr3R:16856281(+))



mir-iab-4 (chr3R:16856281(+))

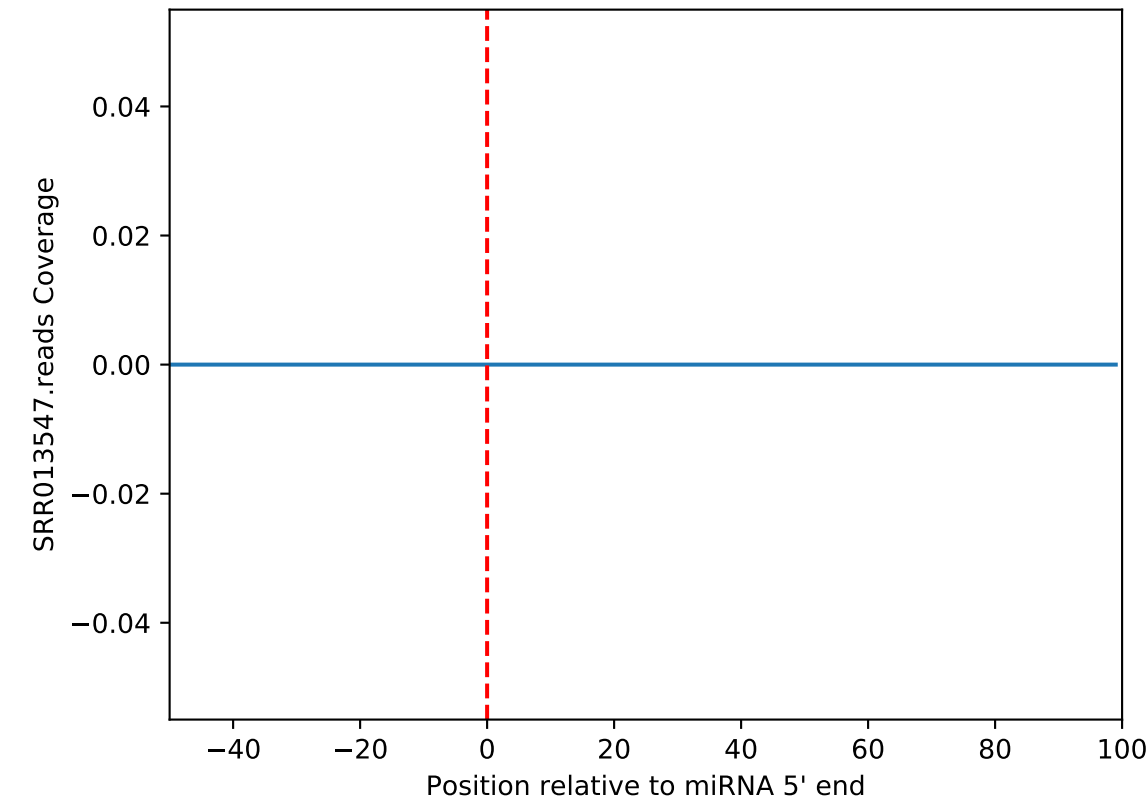

mir-iab-4 (chr3R:16856281(+))

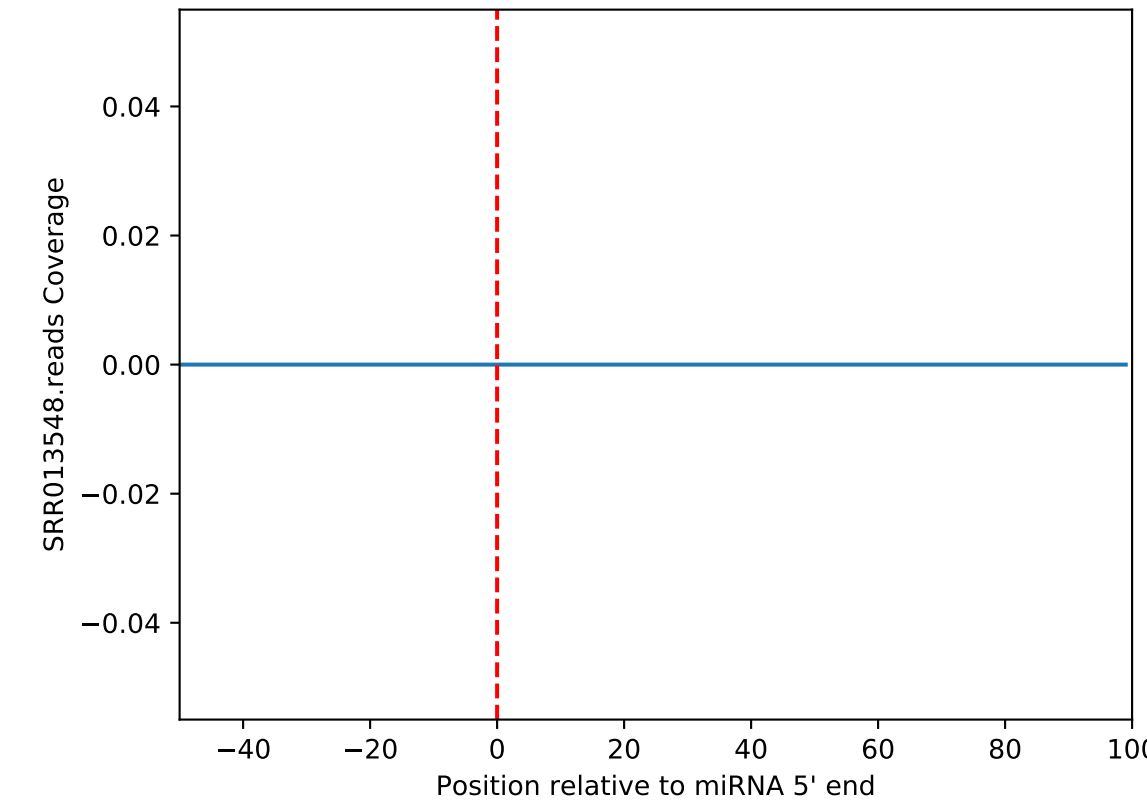

mir-4948 (chr3R:31051180(-))

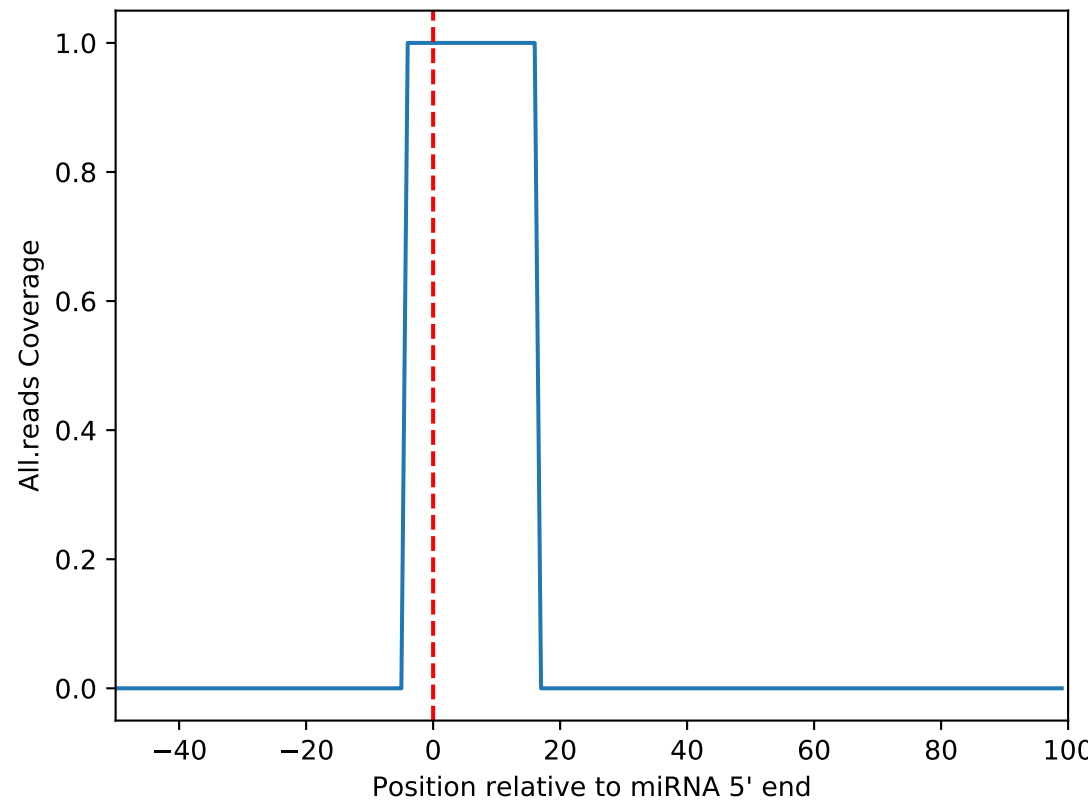

mir-4948 (chr3R:31051180(-))



mir-4948 (chr3R:31051180(-))

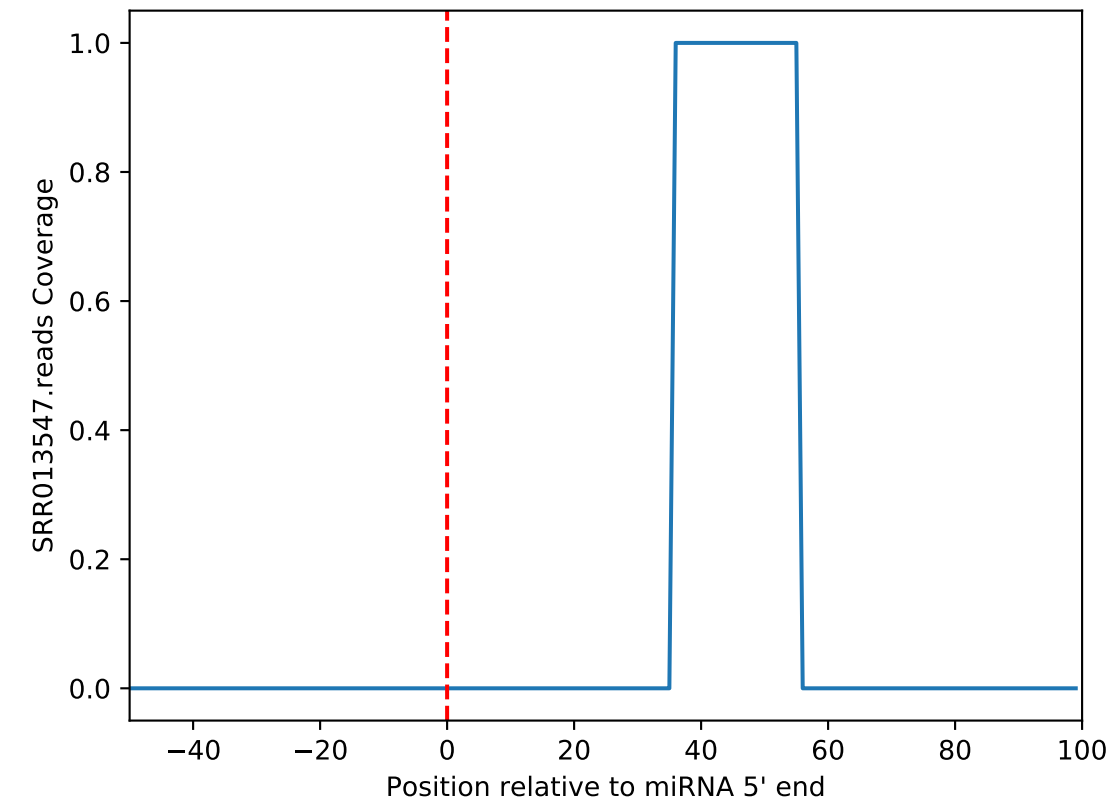

mir-4948 (chr3R:31051180(-))

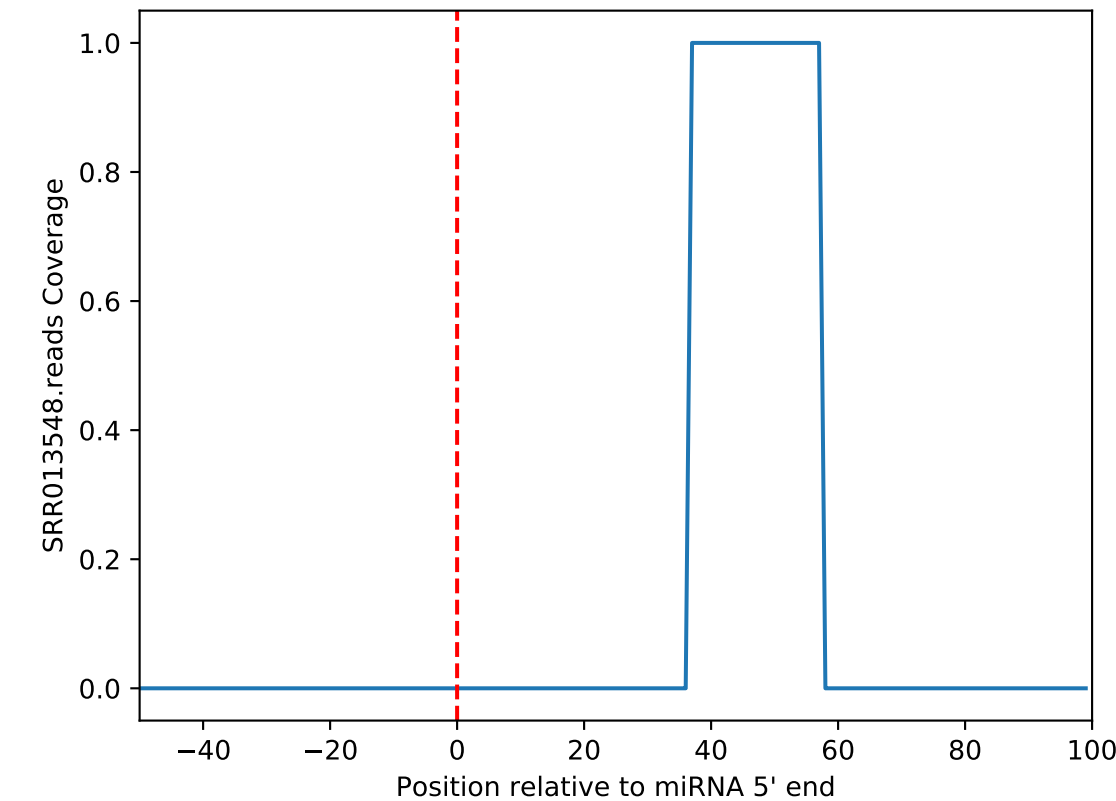

mir-1004 (chr2L:3767621(+))

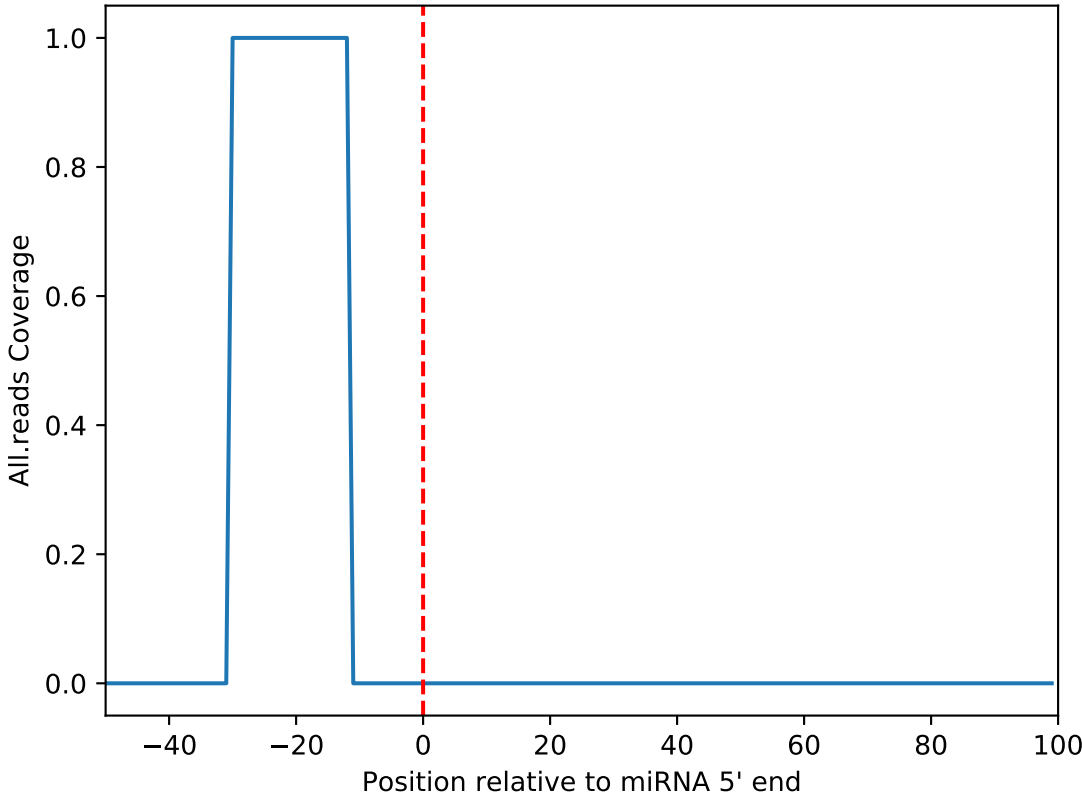

mir-1004 (chr2L:3767621(+))



mir-1004 (chr2L:3767621(+))

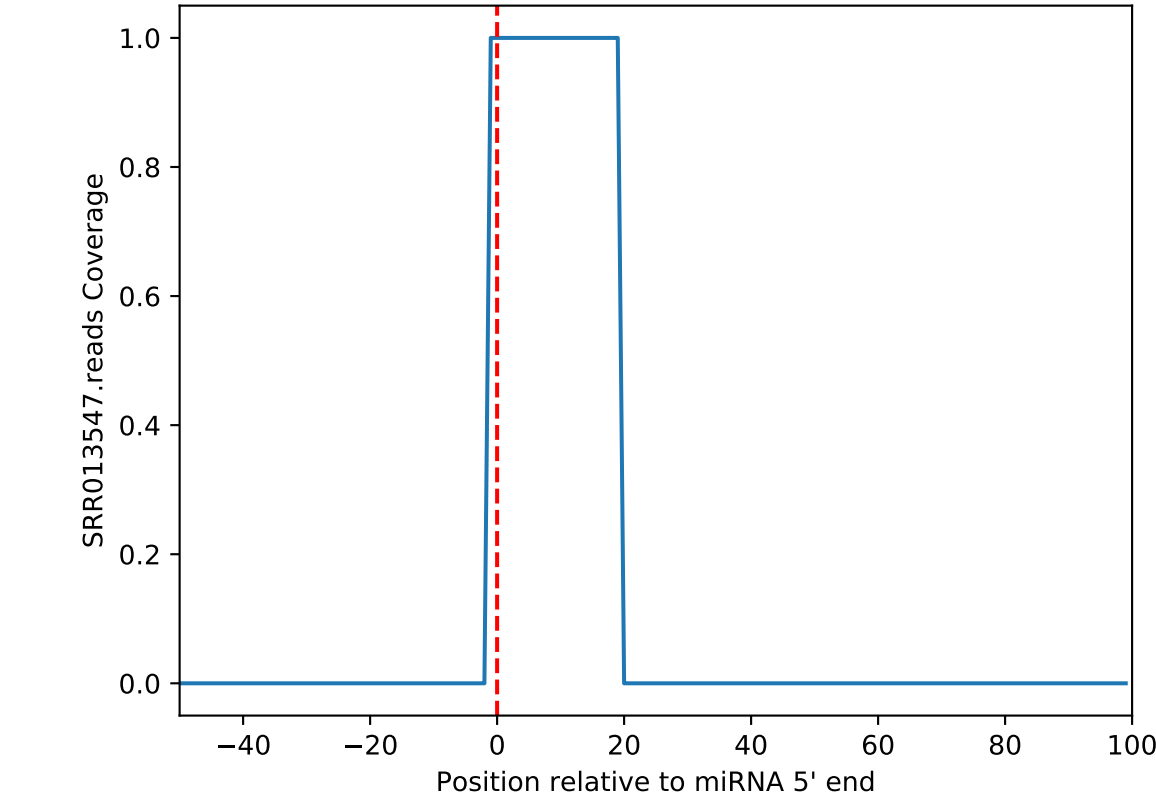

mir-1004 (chr2L:3767621(+))



mir-315 (chr3L:18860982(+))

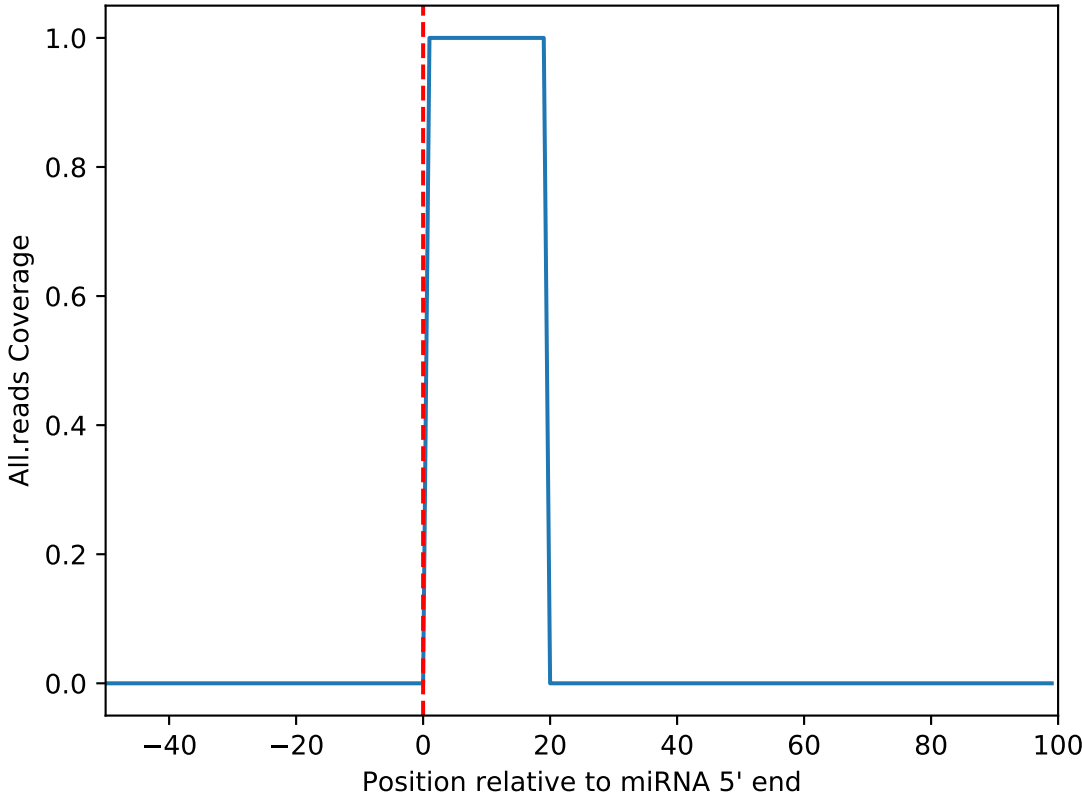

mir-315 (chr3L:18860982(+))

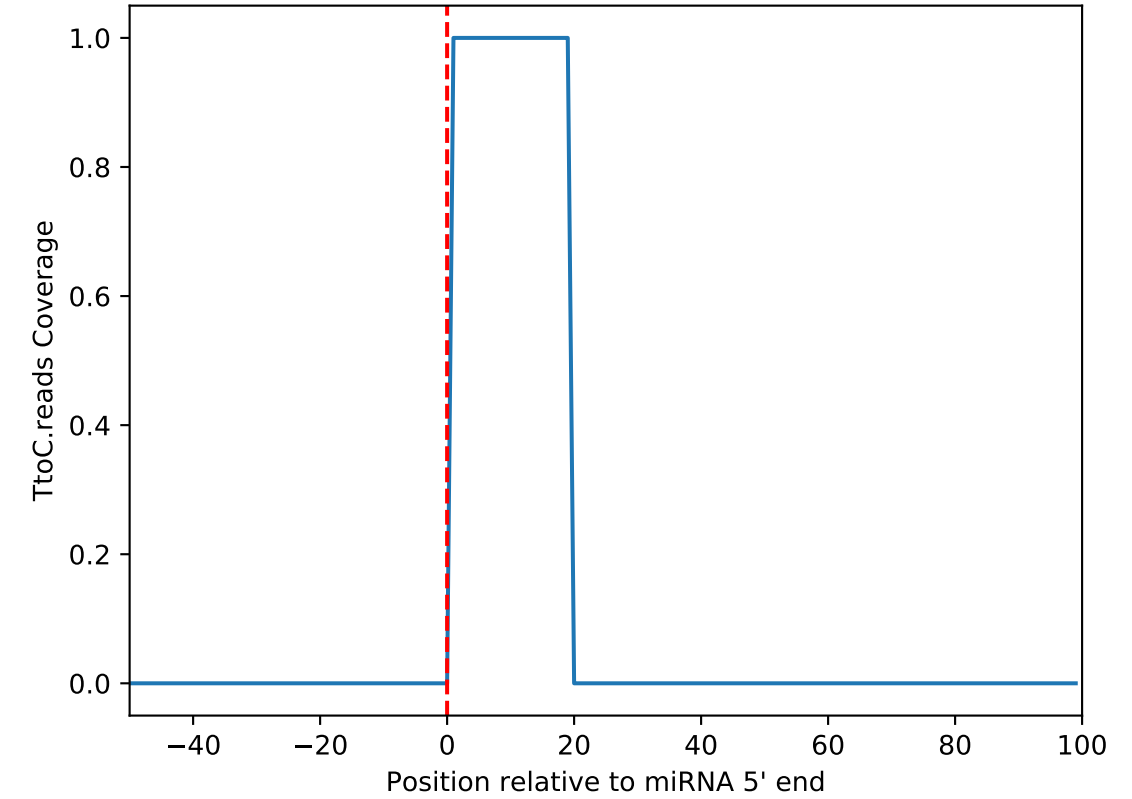

mir-315 (chr3L:18860982(+))

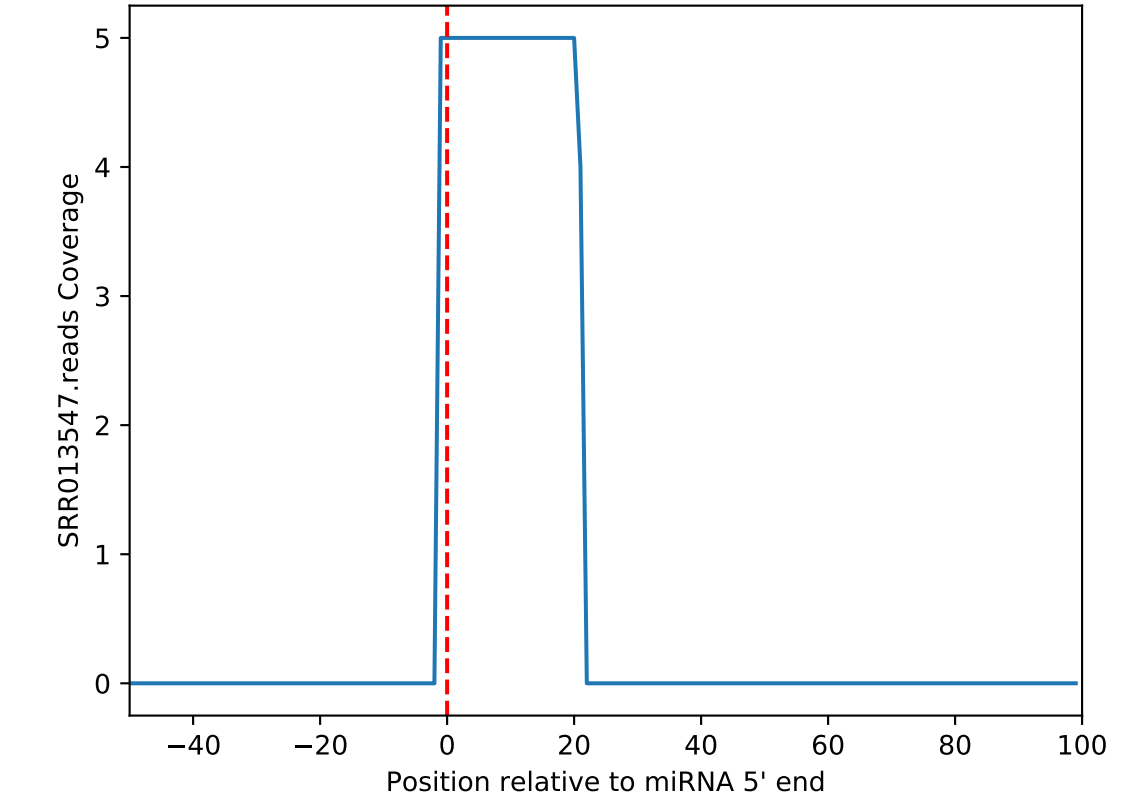

mir-315 (chr3L:18860982(+))

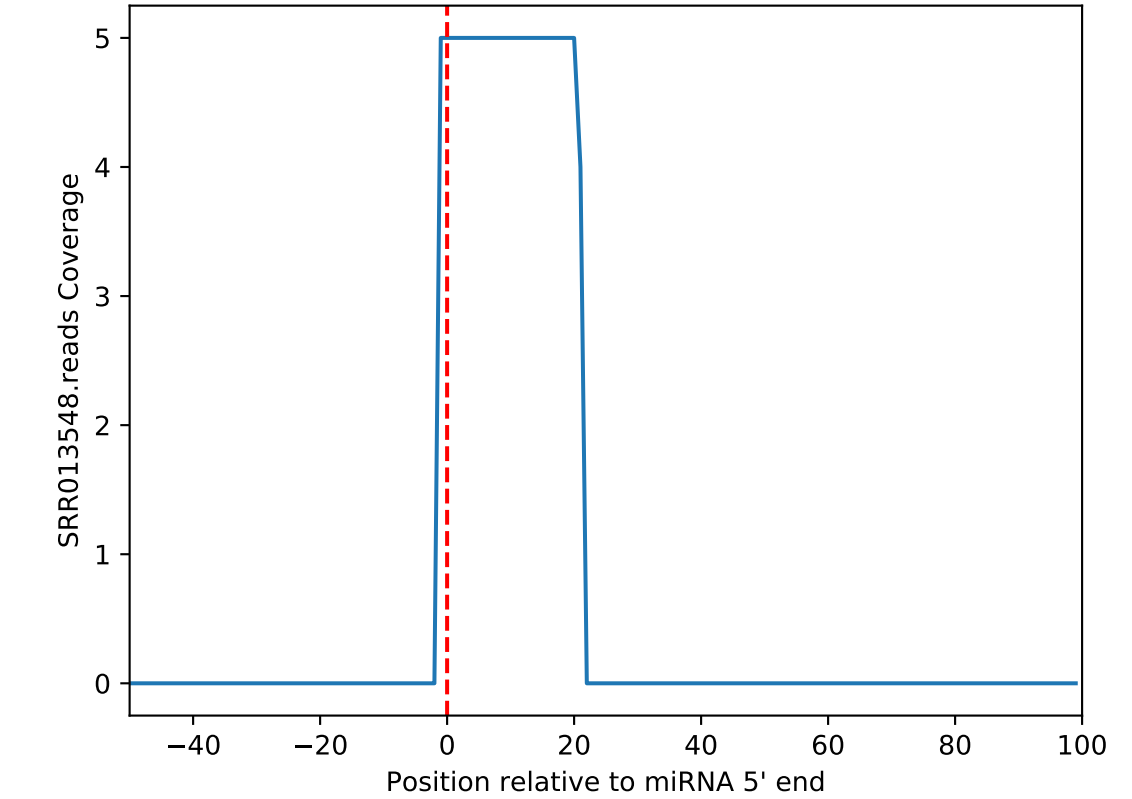

mir-4965 (chrX:16606125(+))

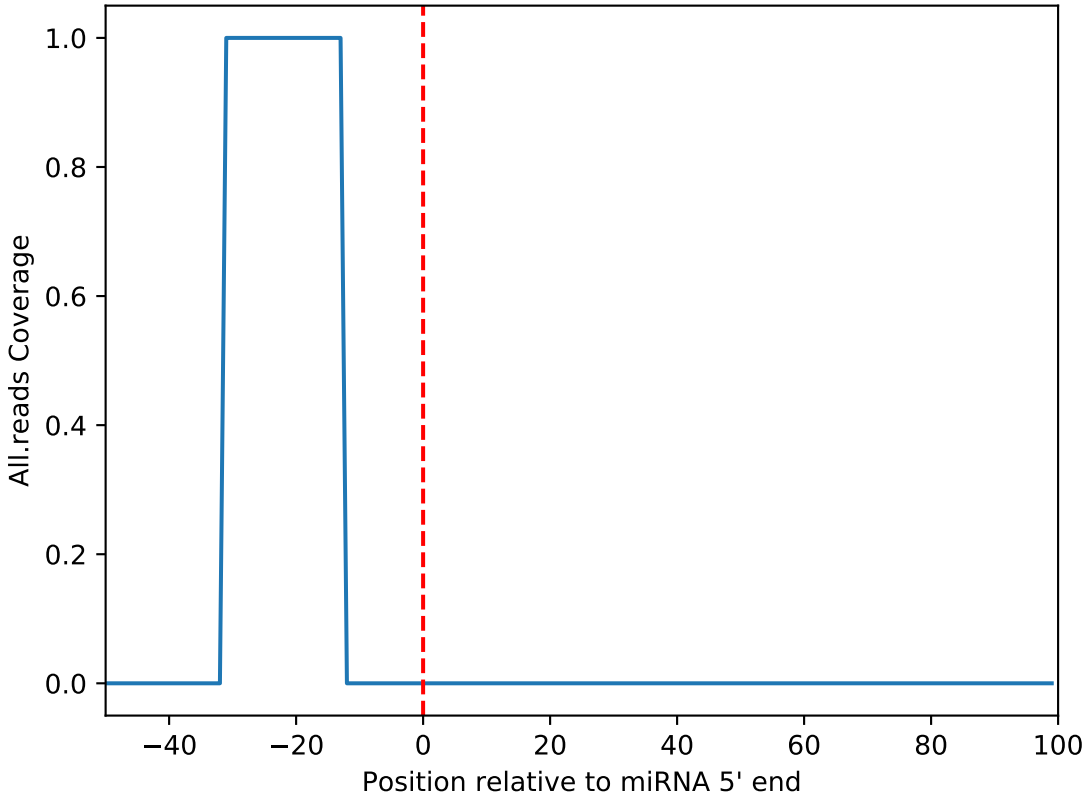

mir-4965 (chrX:16606125(+))



mir-4965 (chrX:16606125(+))



mir-4965 (chrX:16606125(+))



mir-6-3 (chr2R:19660787(-))

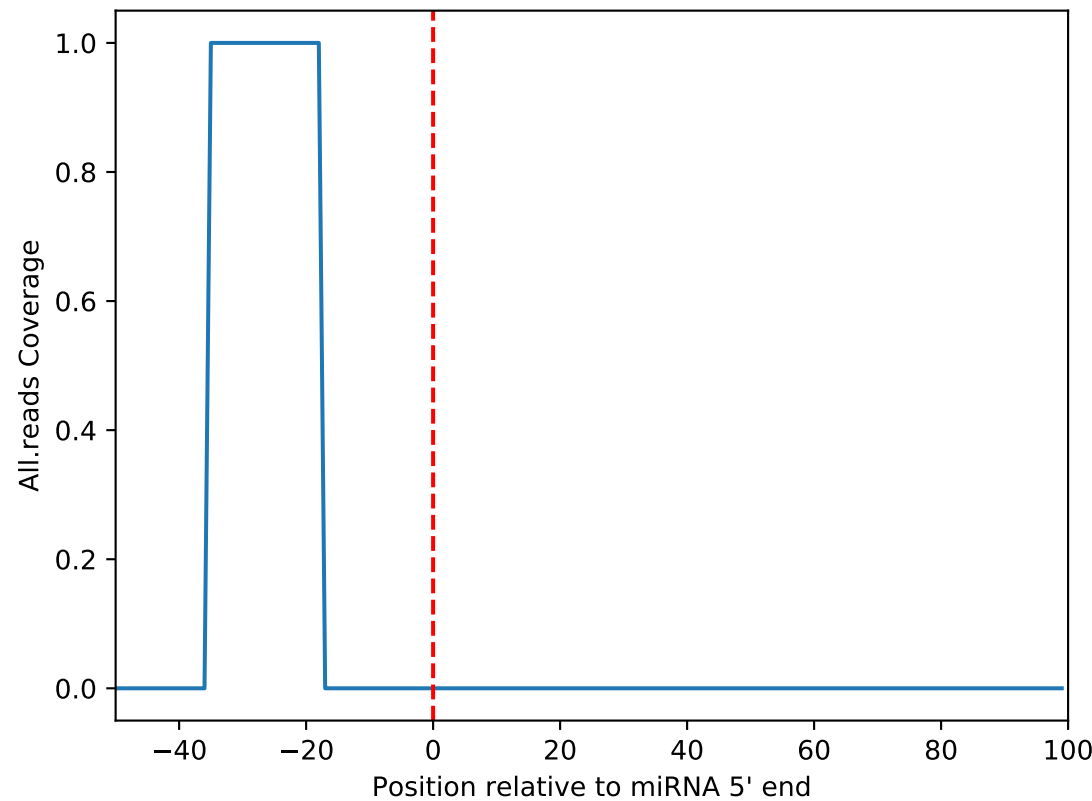

mir-6-3 (chr2R:19660787(-))



mir-6-3 (chr2R:19660787(-))



mir-6-3 (chr2R:19660787(-))

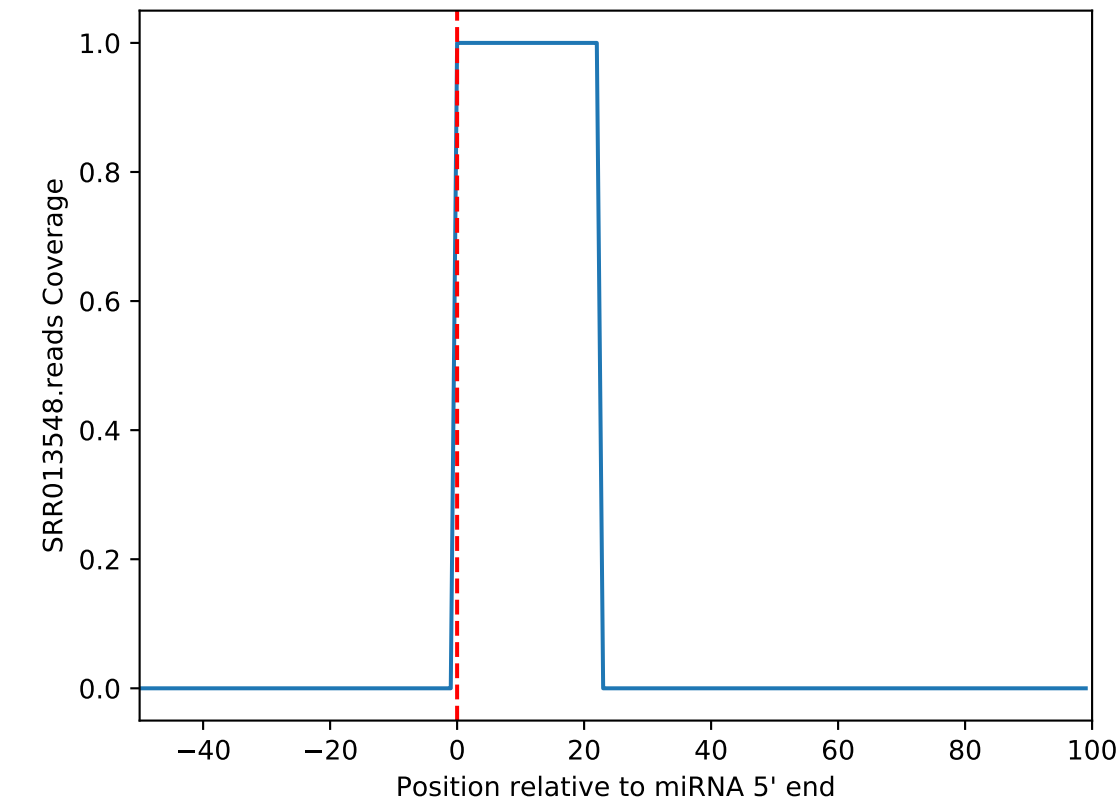

mir-929 (chr3R:4295385(+))

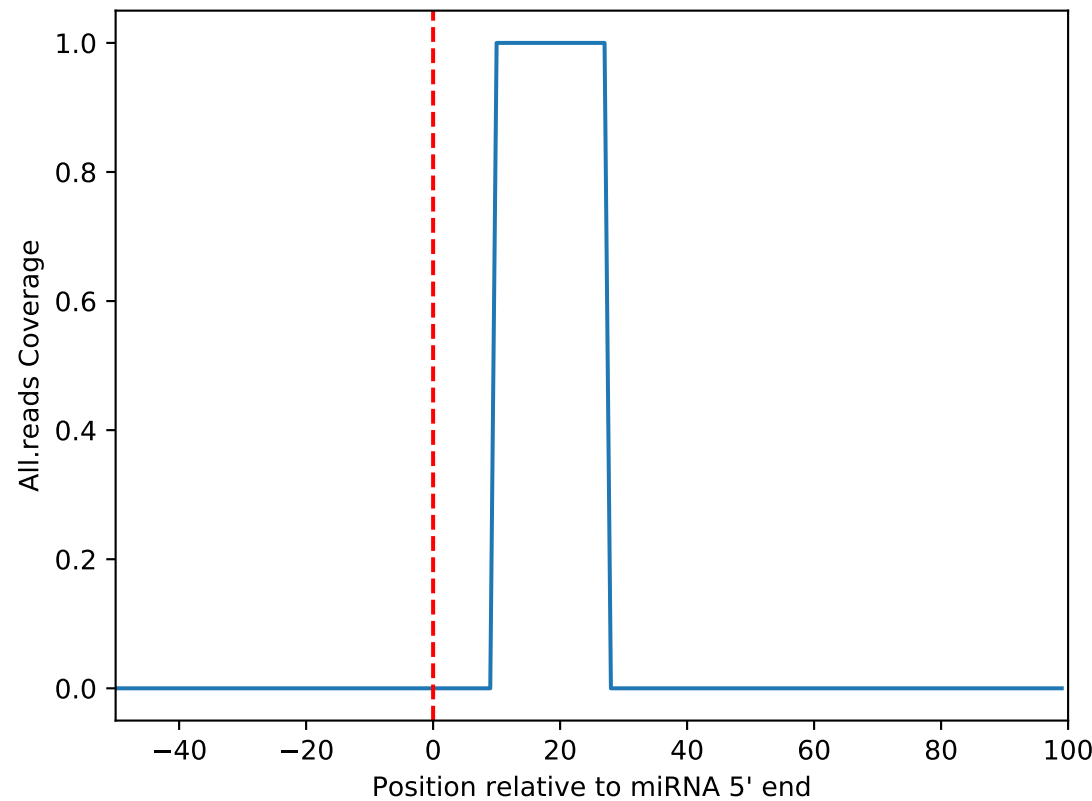

mir-929 (chr3R:4295385(+))

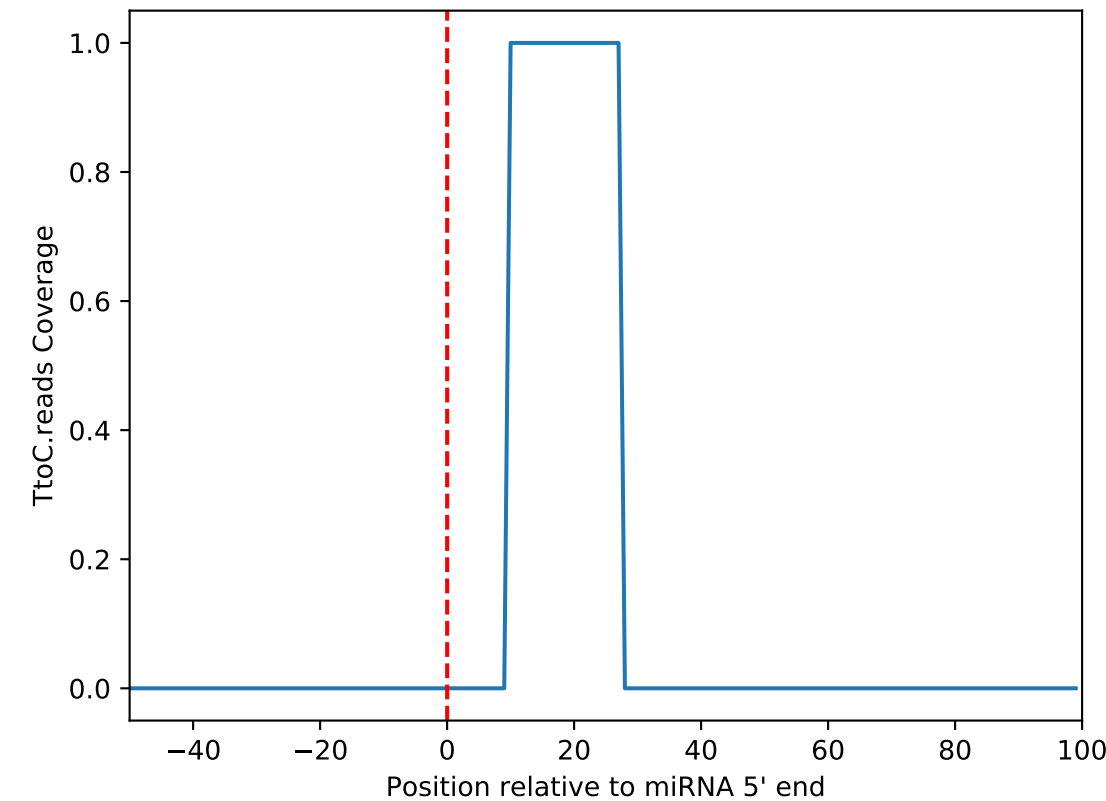

mir-929 (chr3R:4295385(+))

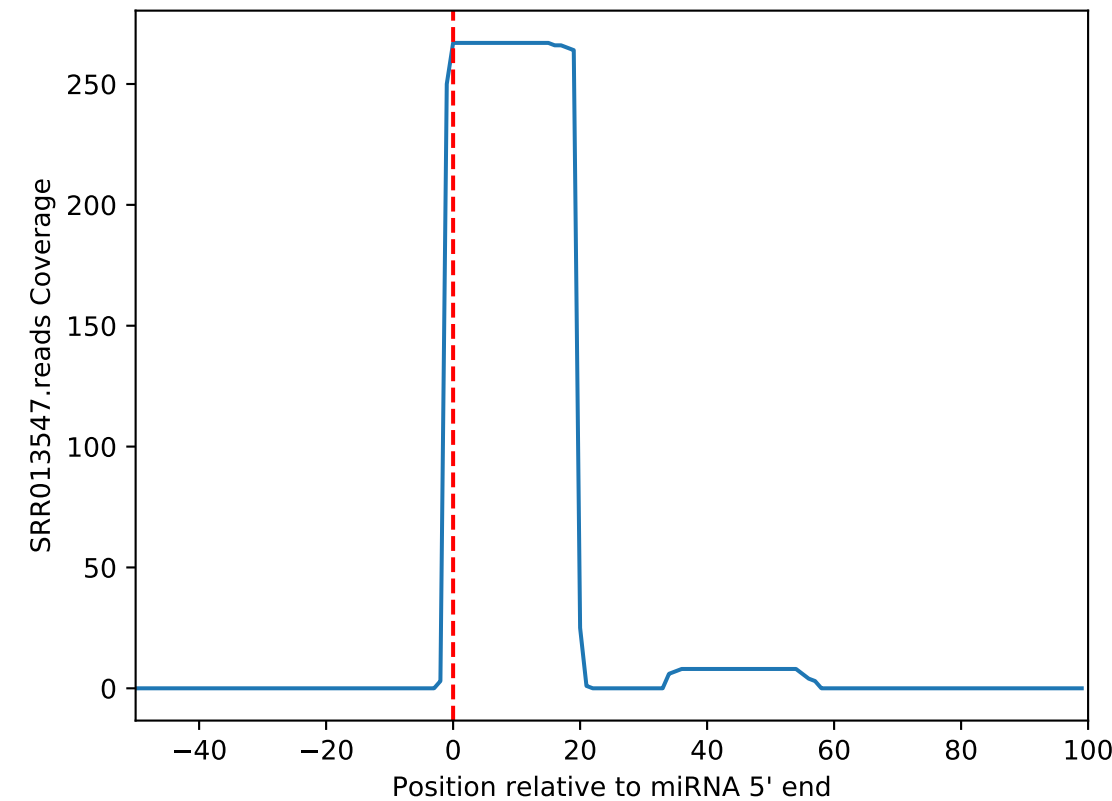

mir-929 (chr3R:4295385(+))

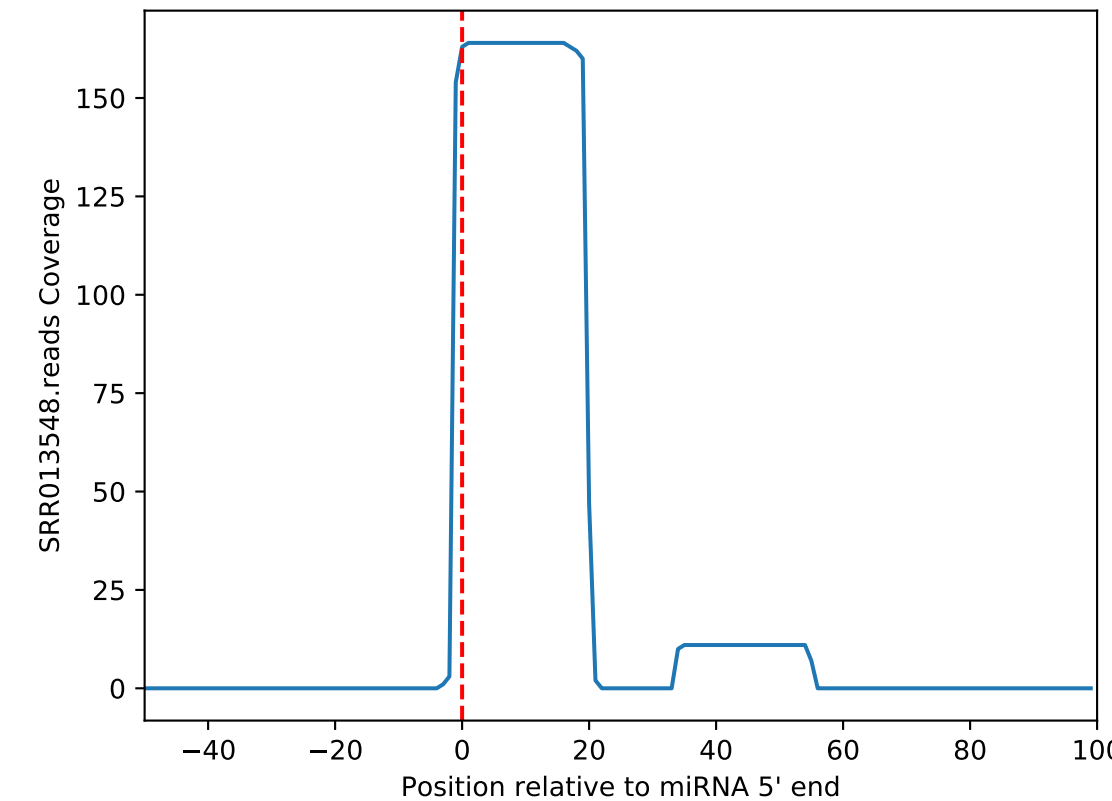

mir-309 (chr2R:19661768(-))

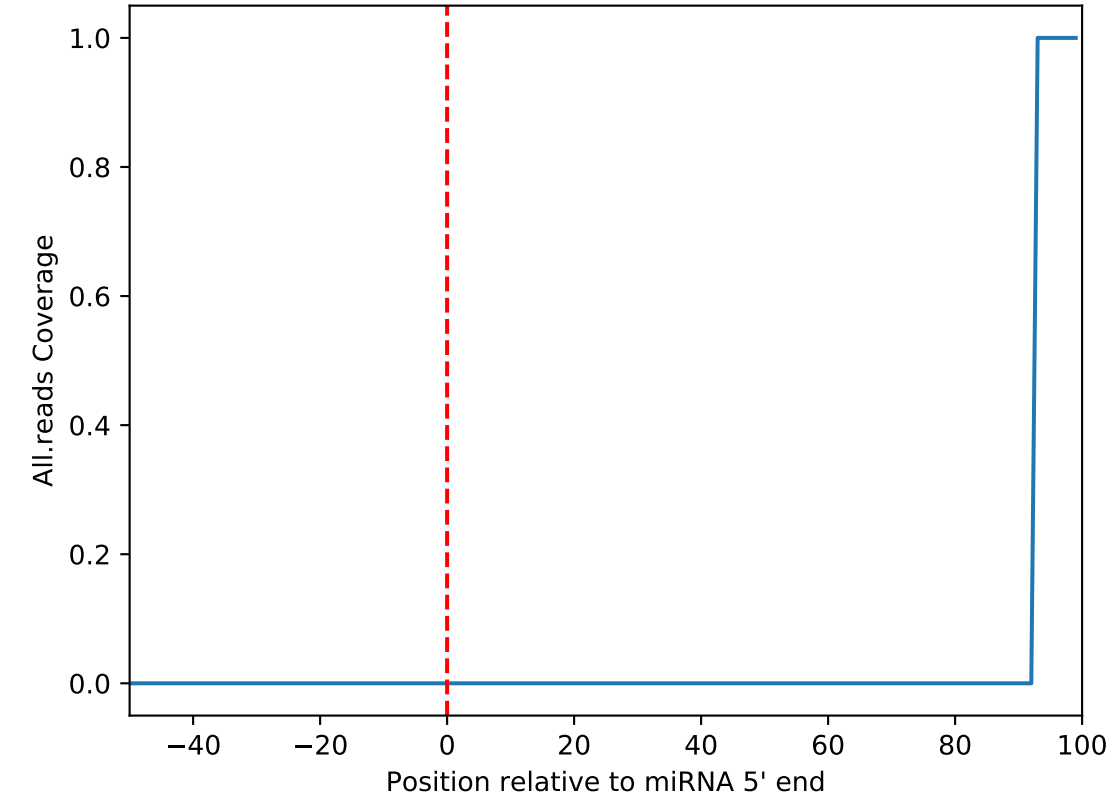

mir-309 (chr2R:19661768(-))



mir-309 (chr2R:19661768(-))



mir-309 (chr2R:19661768(-))





mir-2490 (chr2L:23168833(+))

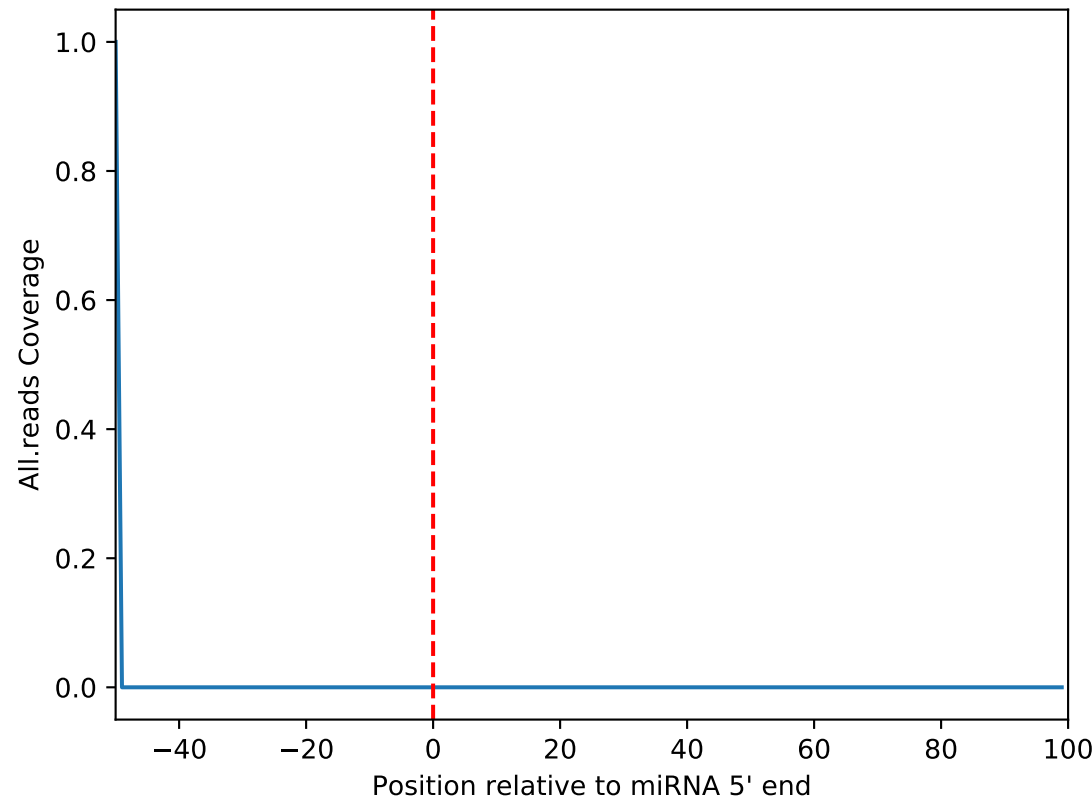

mir-2490 (chr2L:23168833(+))

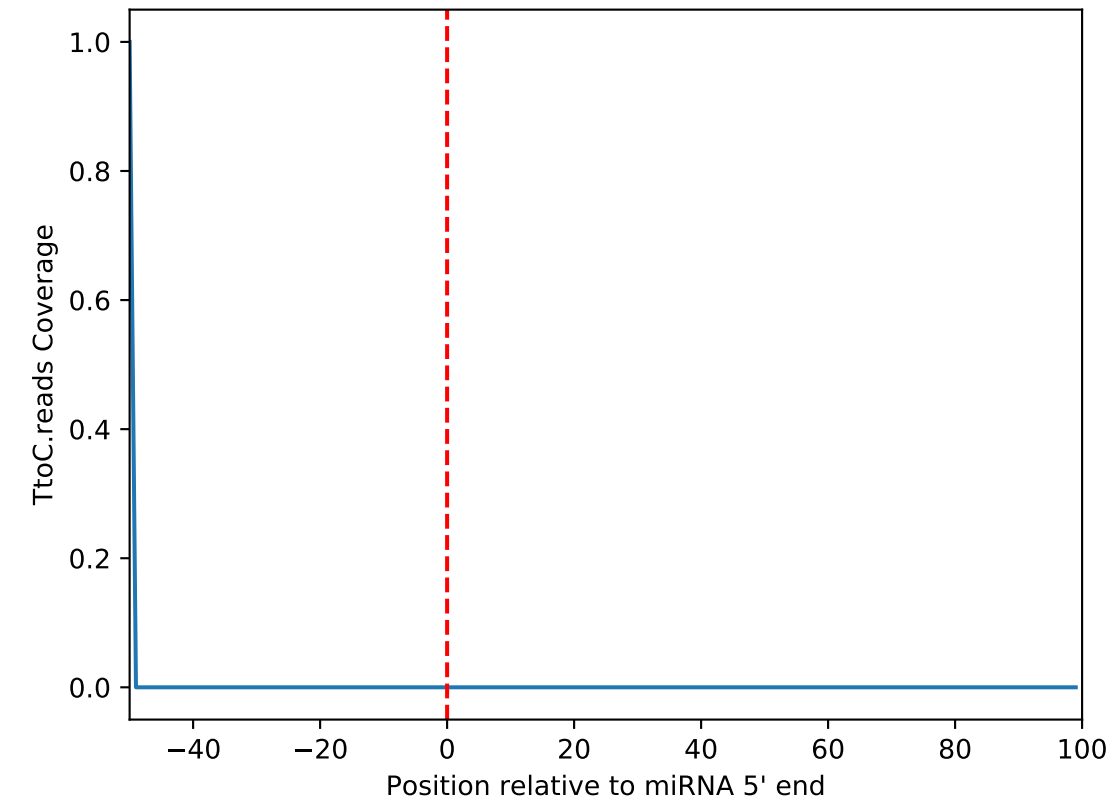

mir-2490 (chr2L:23168833(+))

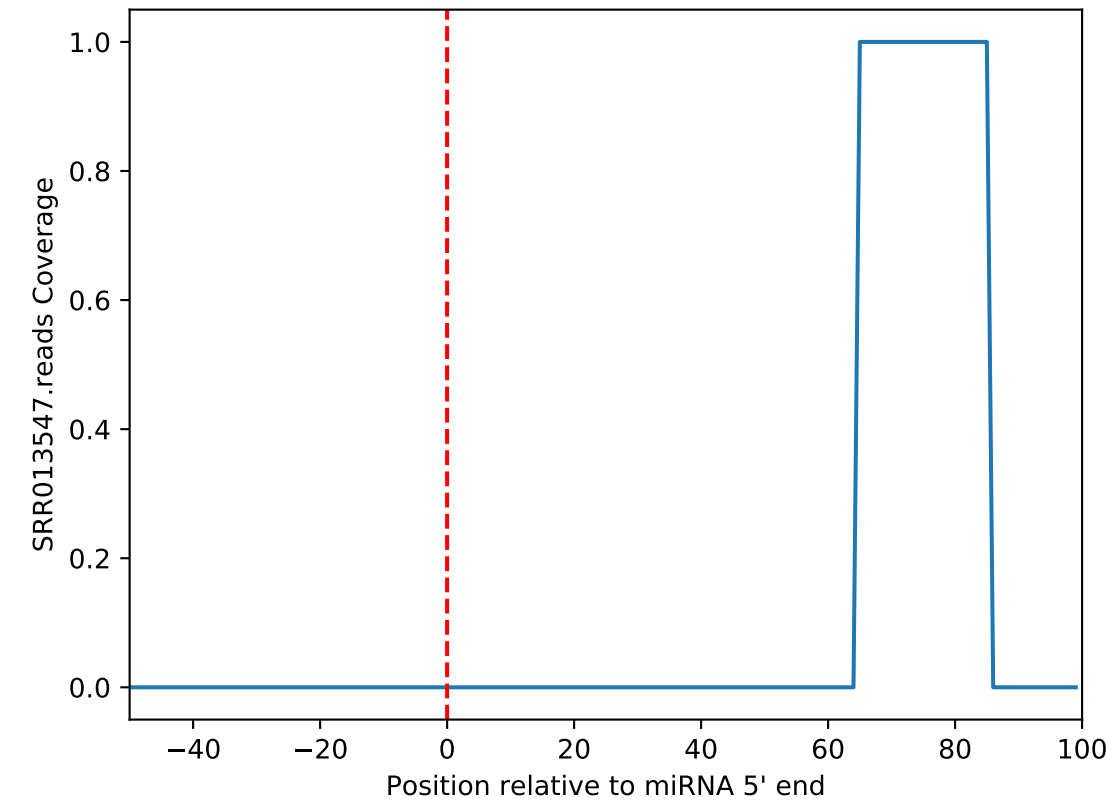

mir-2490 (chr2L:23168833(+))



mir-4963 (chrX:5790780(+))

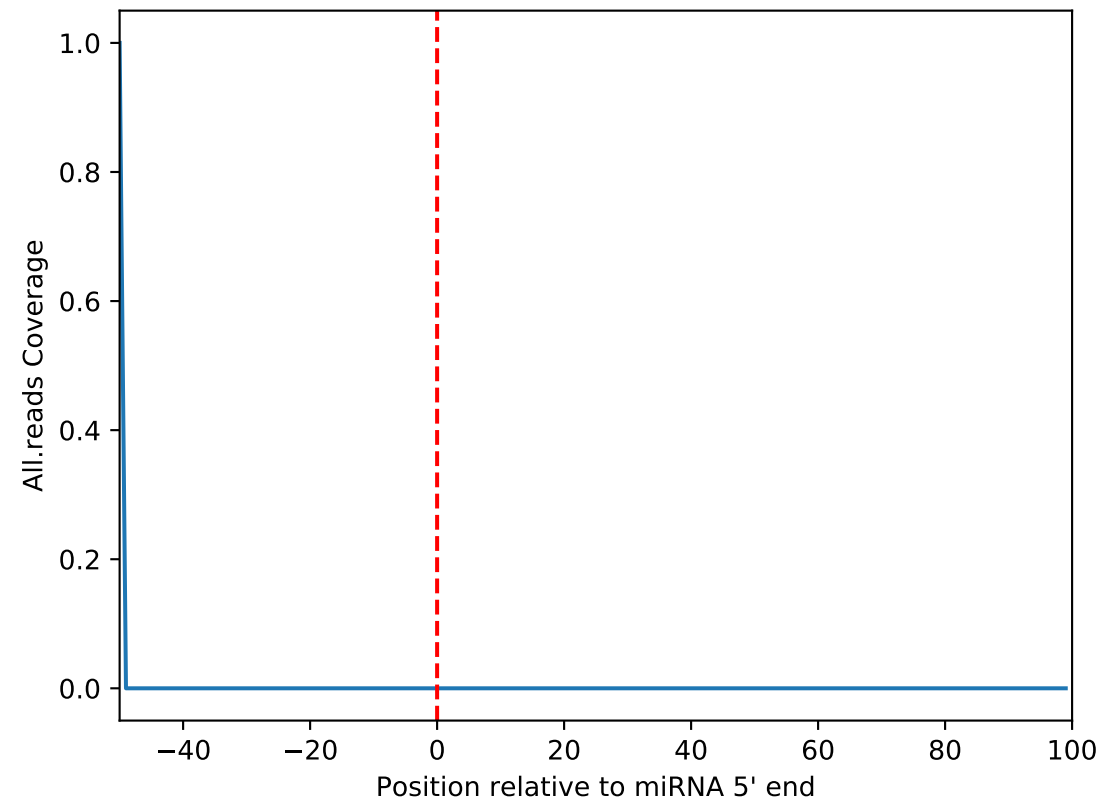

mir-4963 (chrX:5790780(+))



mir-4963 (chrX:5790780(+))

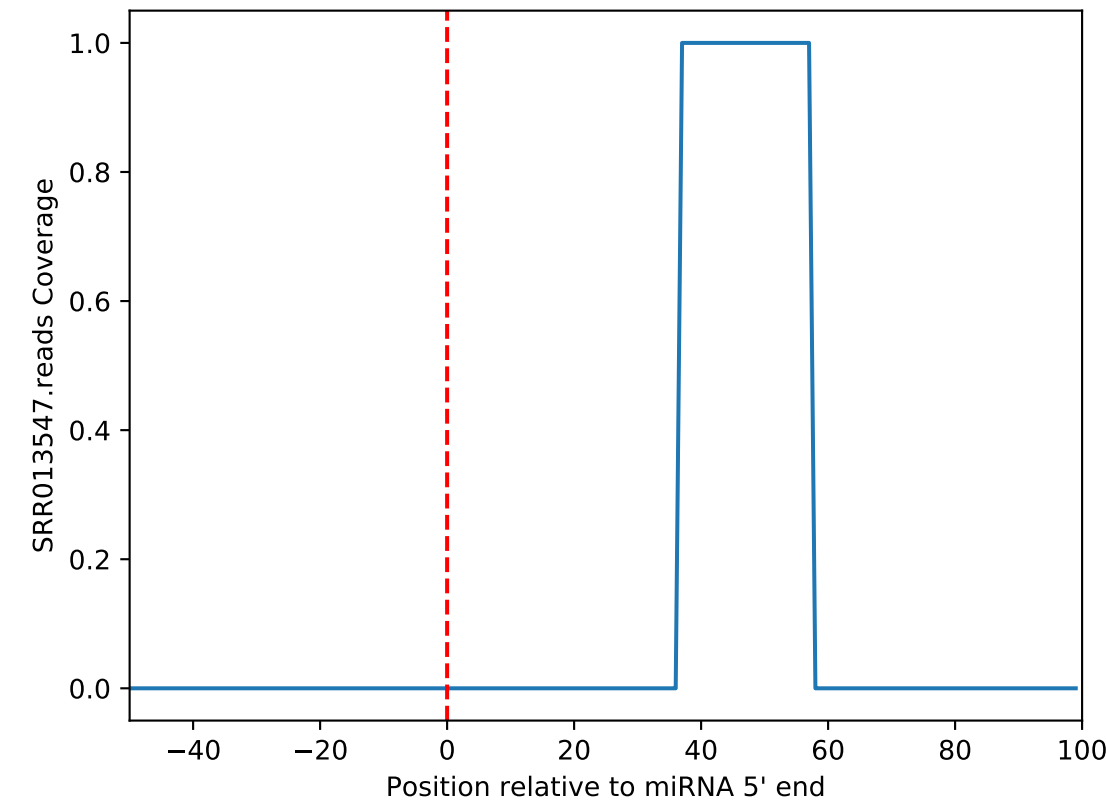

mir-4963 (chrX:5790780(+))

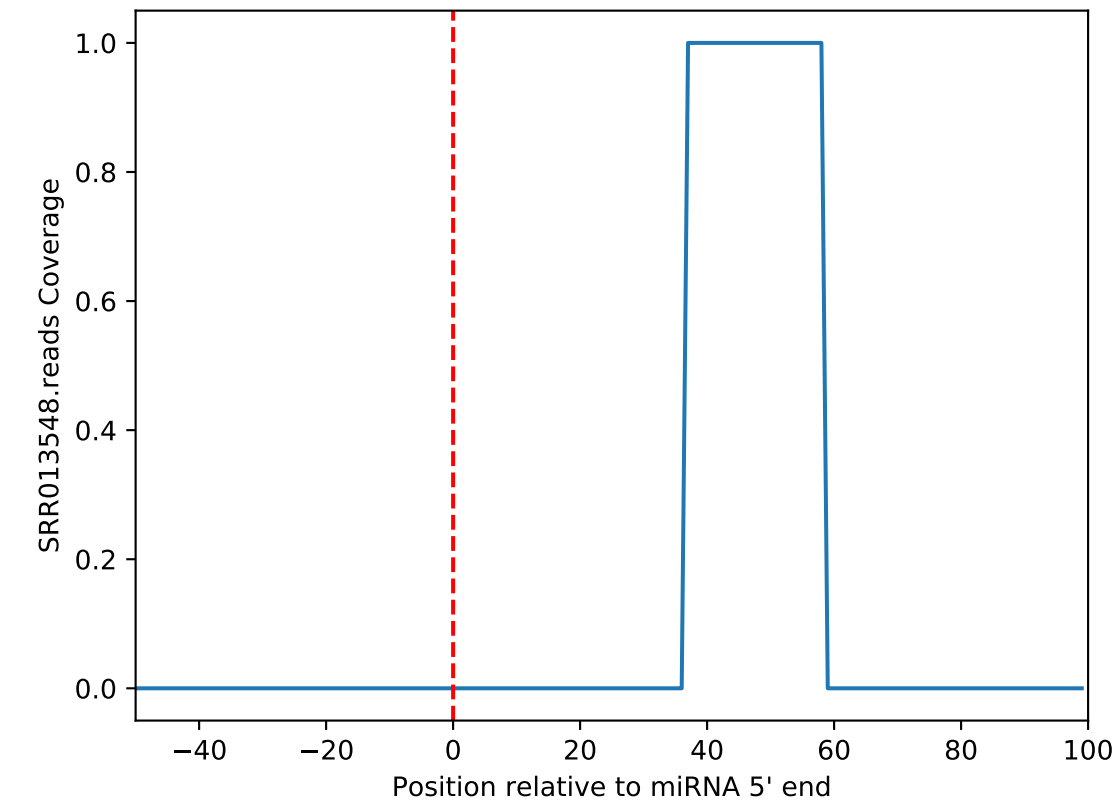

mir-2280 (chr2L:1831770(-))

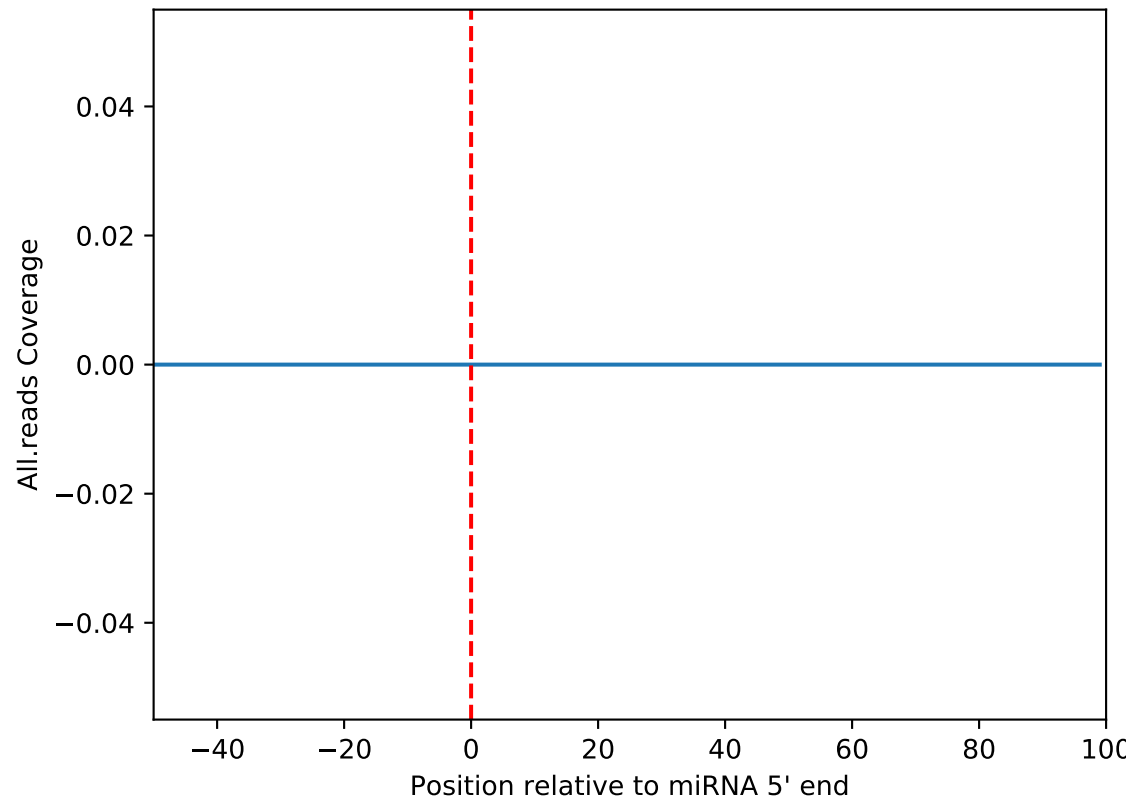

mir-2280 (chr2L:1831770(-))

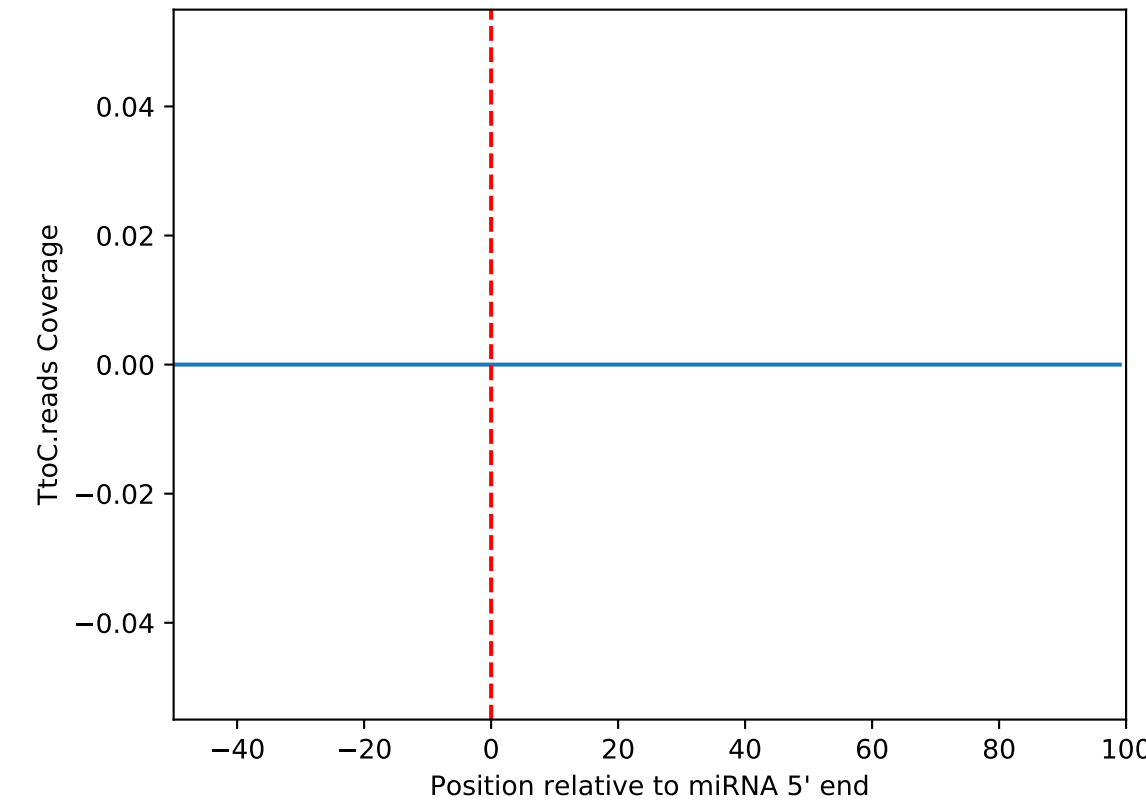

mir-2280 (chr2L:1831770(-))

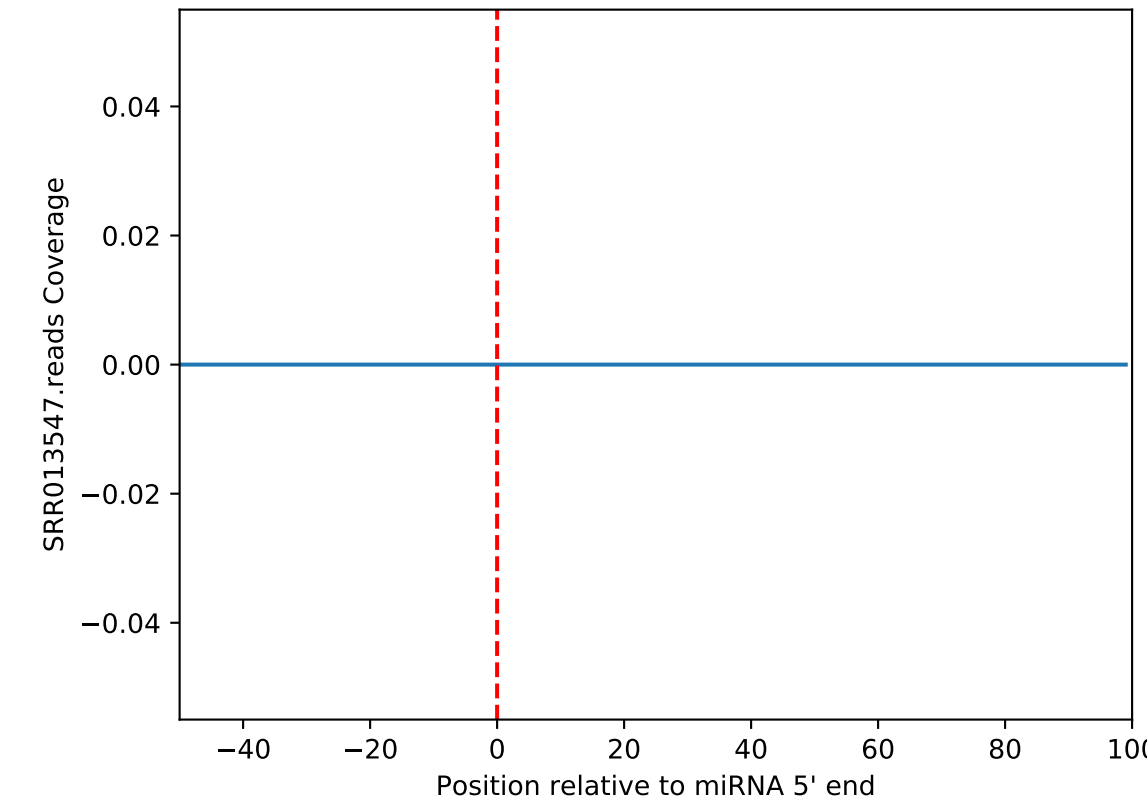

mir-2280 (chr2L:1831770(-))

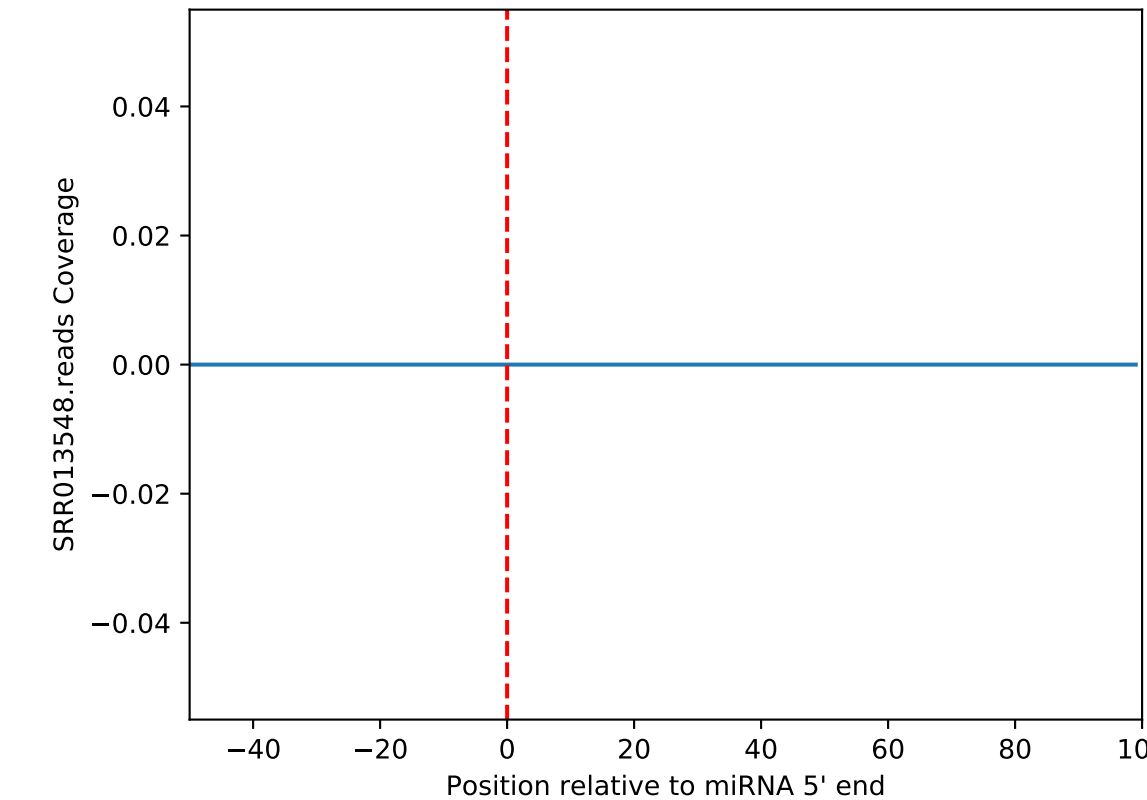

mir-4972 (chr2L:3637049(-))

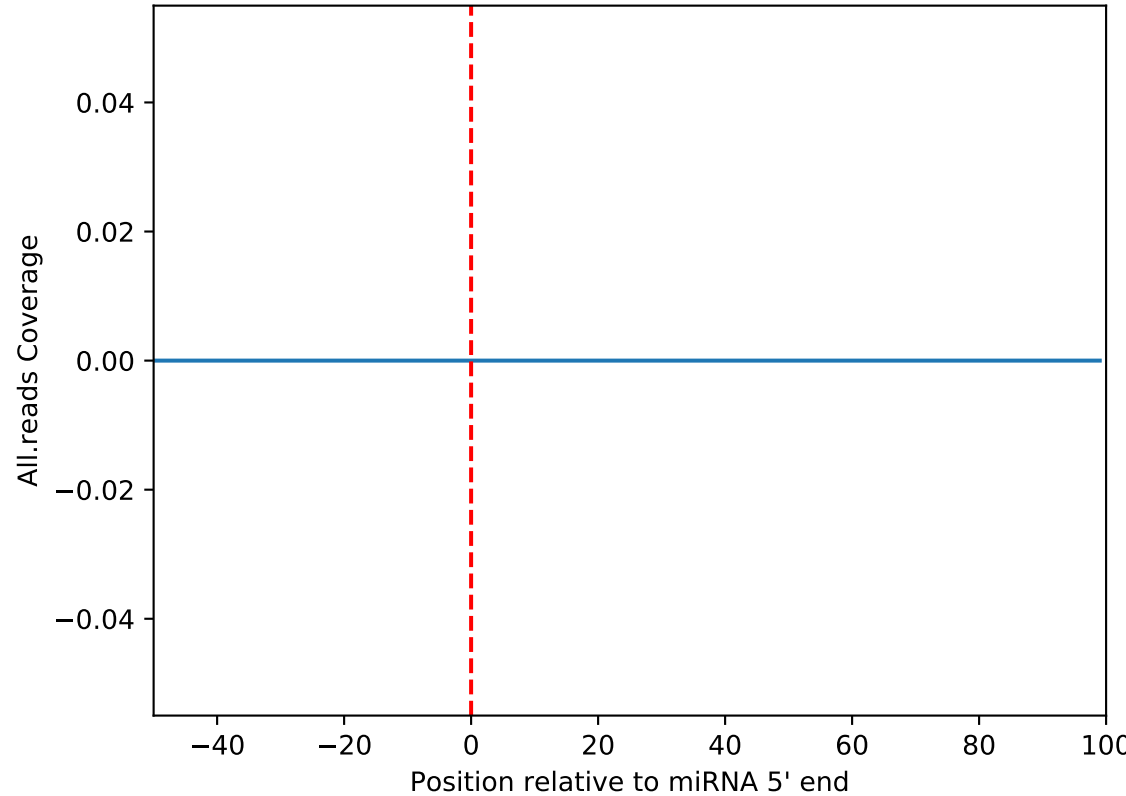

mir-4972 (chr2L:3637049(-))

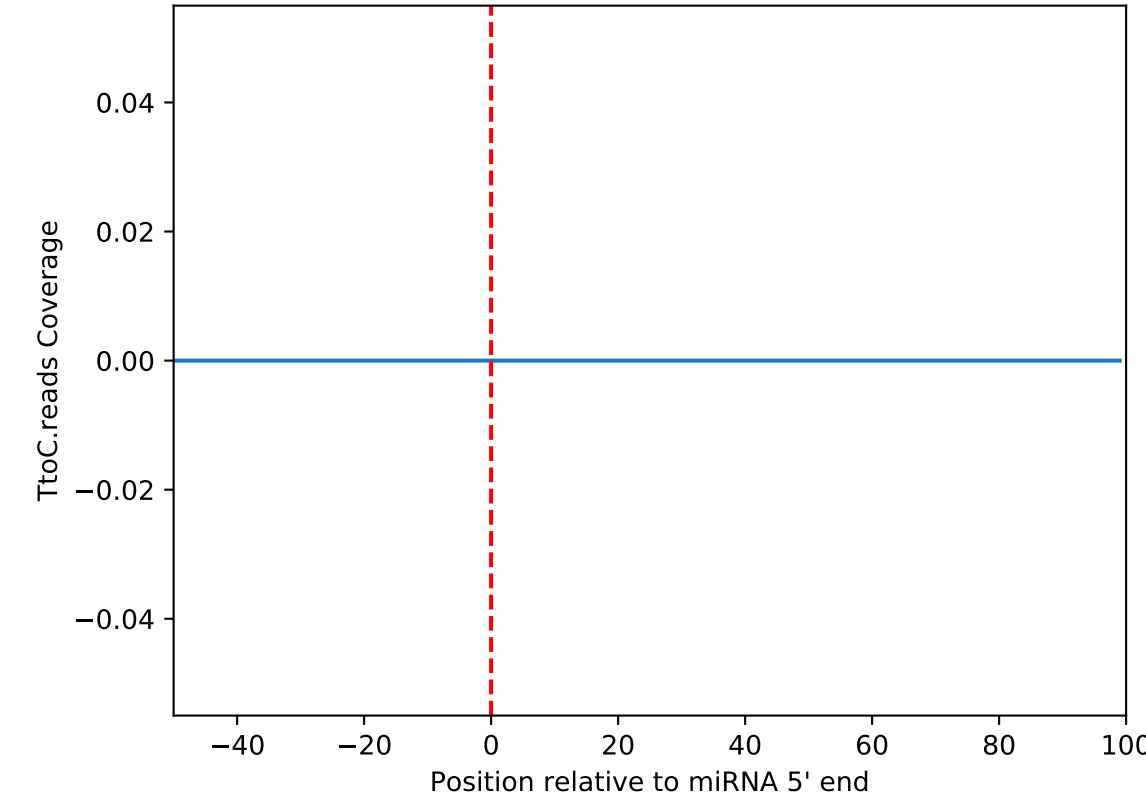

mir-4972 (chr2L:3637049(-))

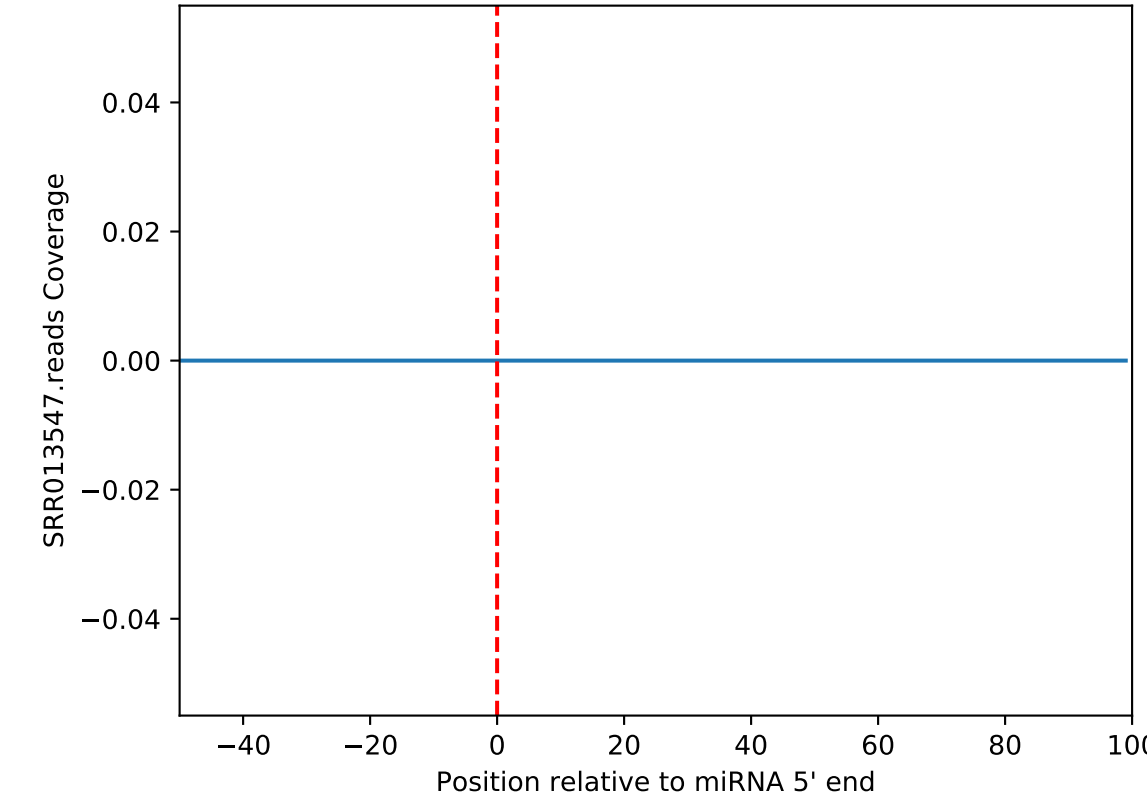

mir-4972 (chr2L:3637049(-))



mir-4984 (chr2L:8141632(-))

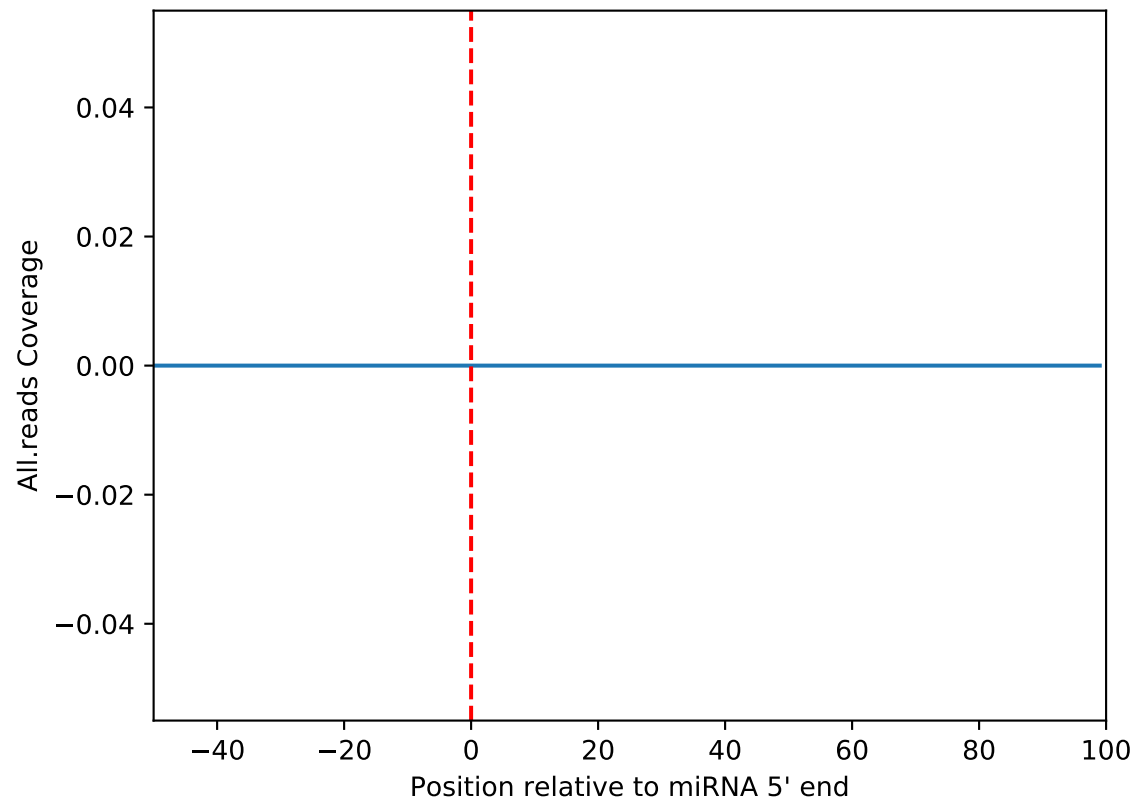

mir-4984 (chr2L:8141632(-))



mir-4984 (chr2L:8141632(-))

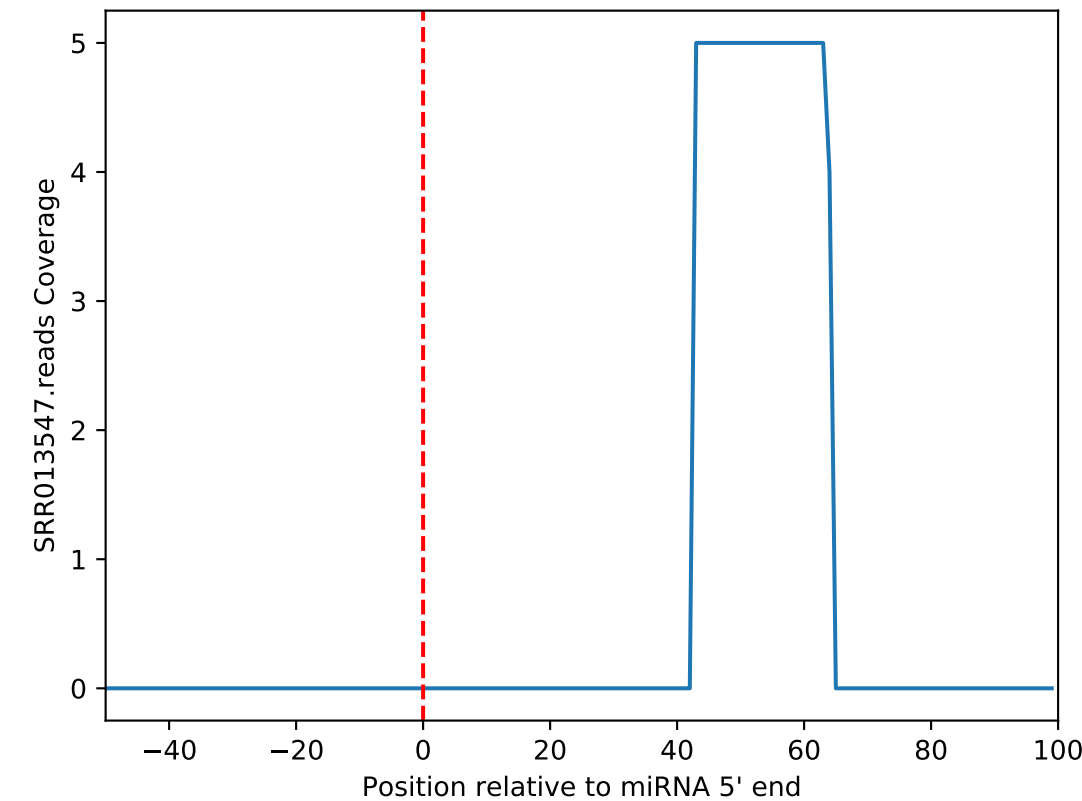

mir-4984 (chr2L:8141632(-))

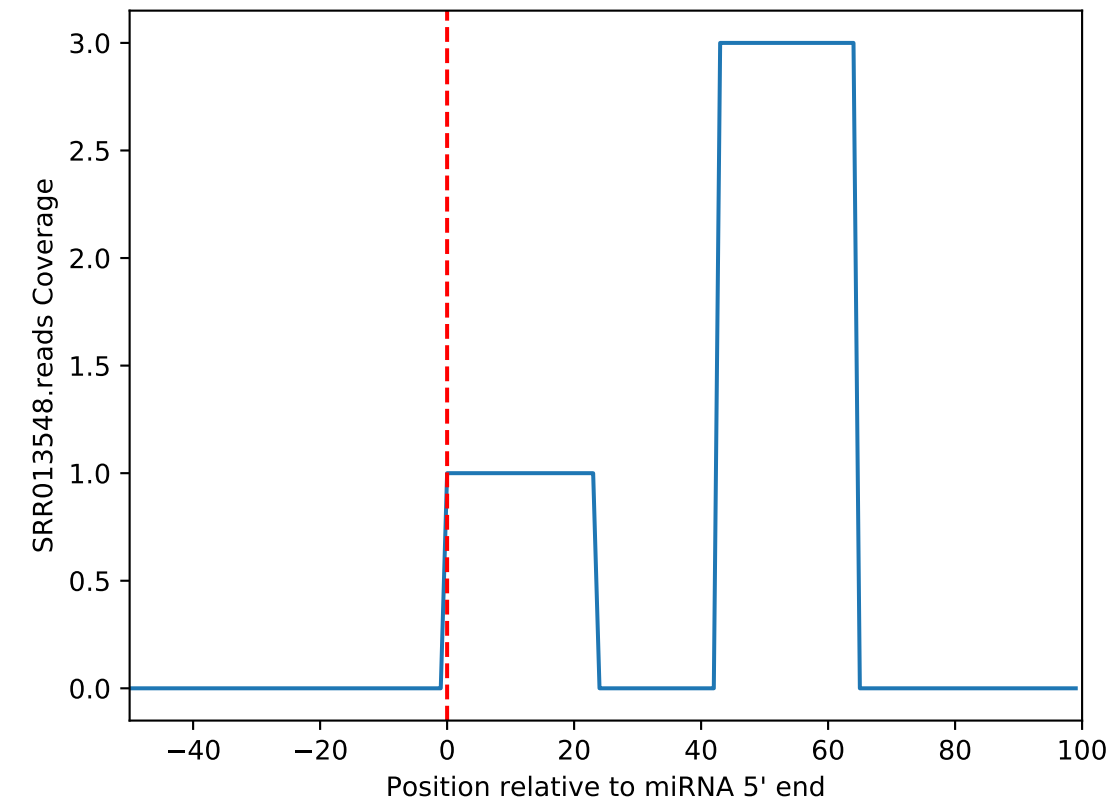

mir-9378 (chr2L:10751938(-))

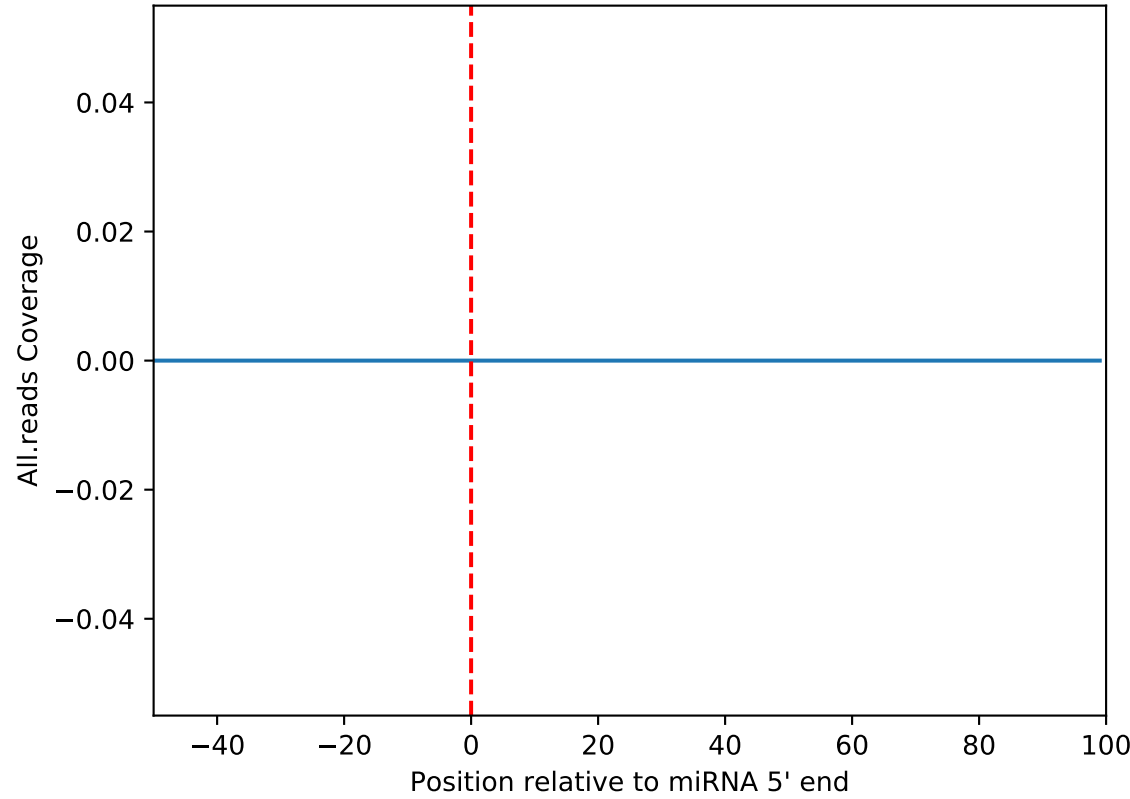

mir-9378 (chr2L:10751938(-))



mir-9378 (chr2L:10751938(-))



mir-9378 (chr2L:10751938(-))



mir-2497 (chr2L:16678250(+))

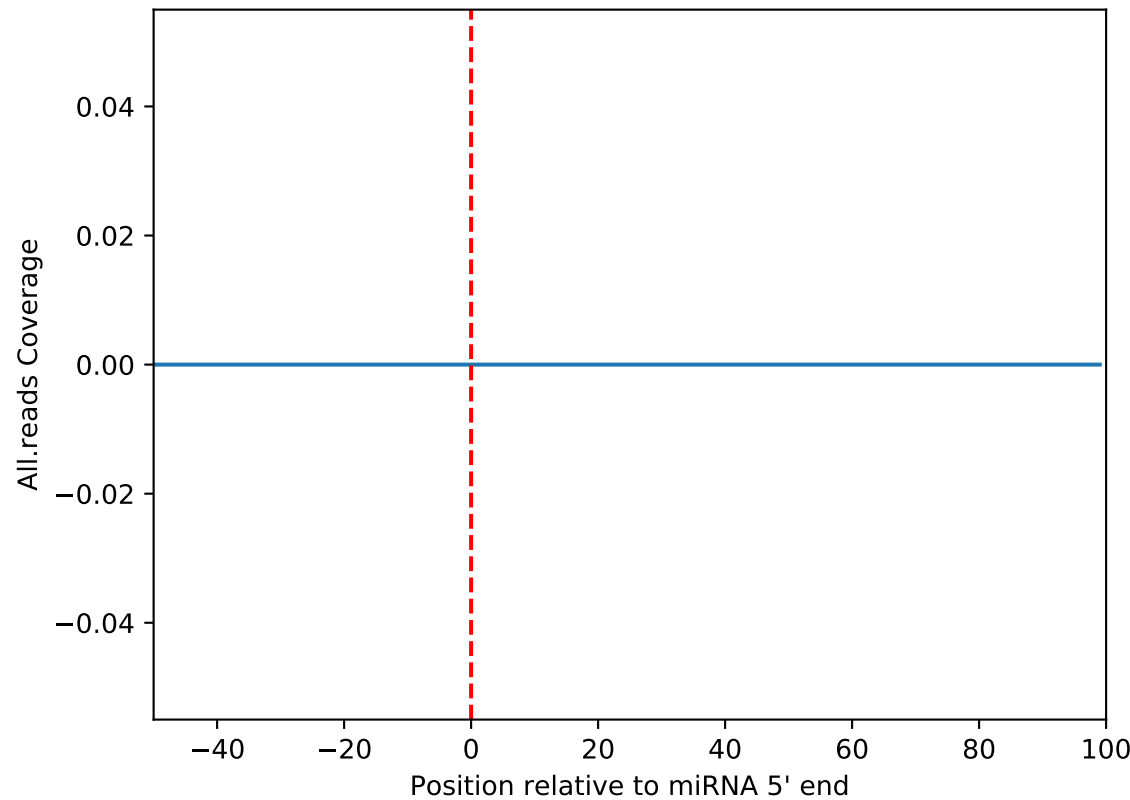

mir-2497 (chr2L:16678250(+))



mir-2497 (chr2L:16678250(+))

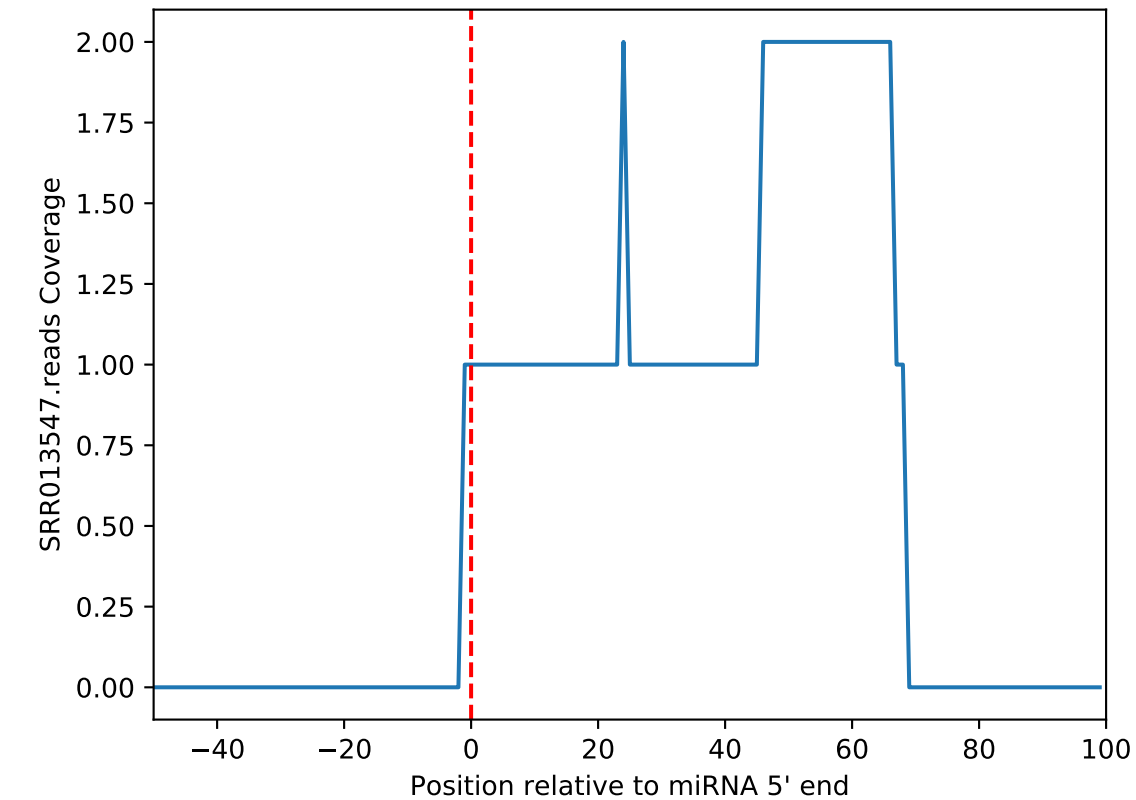

mir-2497 (chr2L:16678250(+))

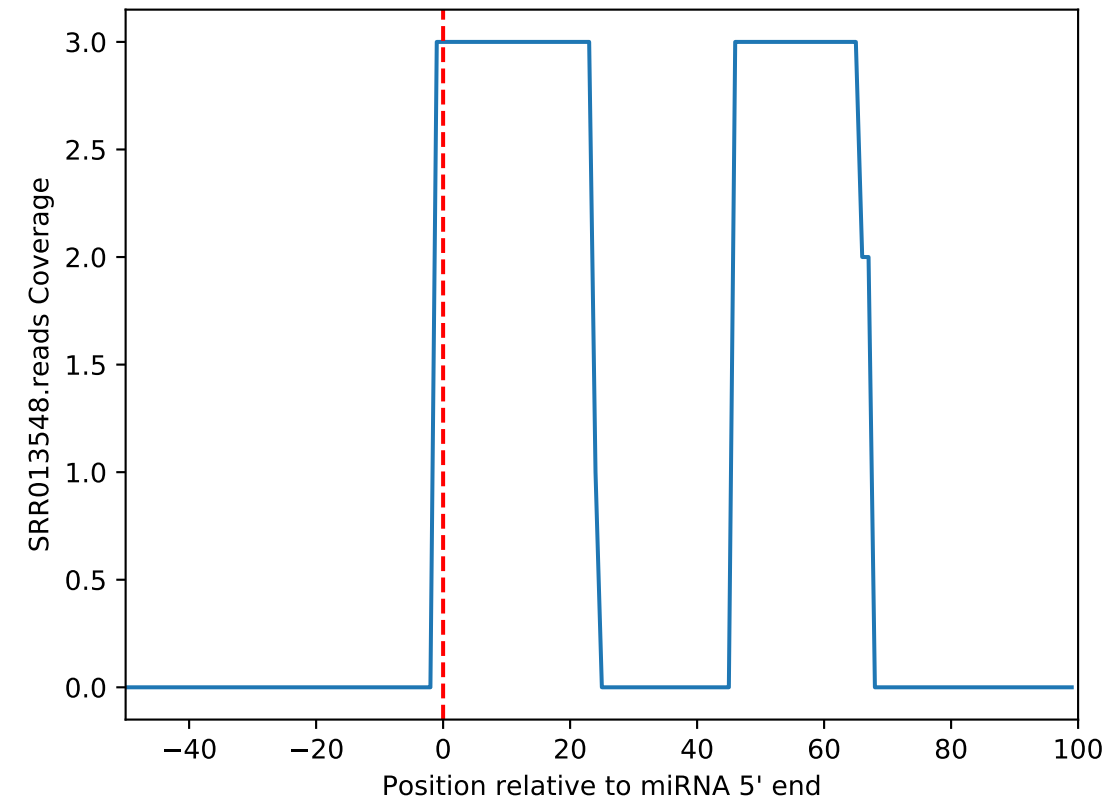

mir-4974 (chr2L:21263955(+))



mir-4974 (chr2L:21263955(+))



mir-4974 (chr2L:21263955(+))



mir-4974 (chr2L:21263955(+))

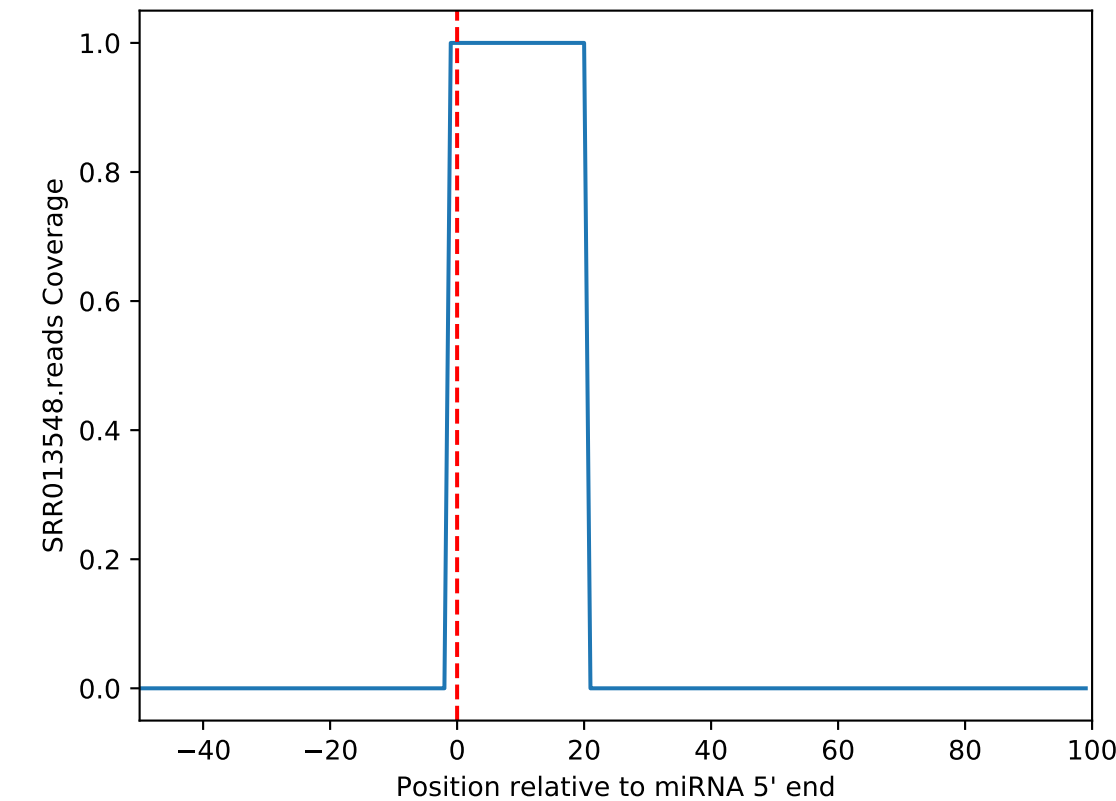



mir-2279 (chr2R:2552252(-))

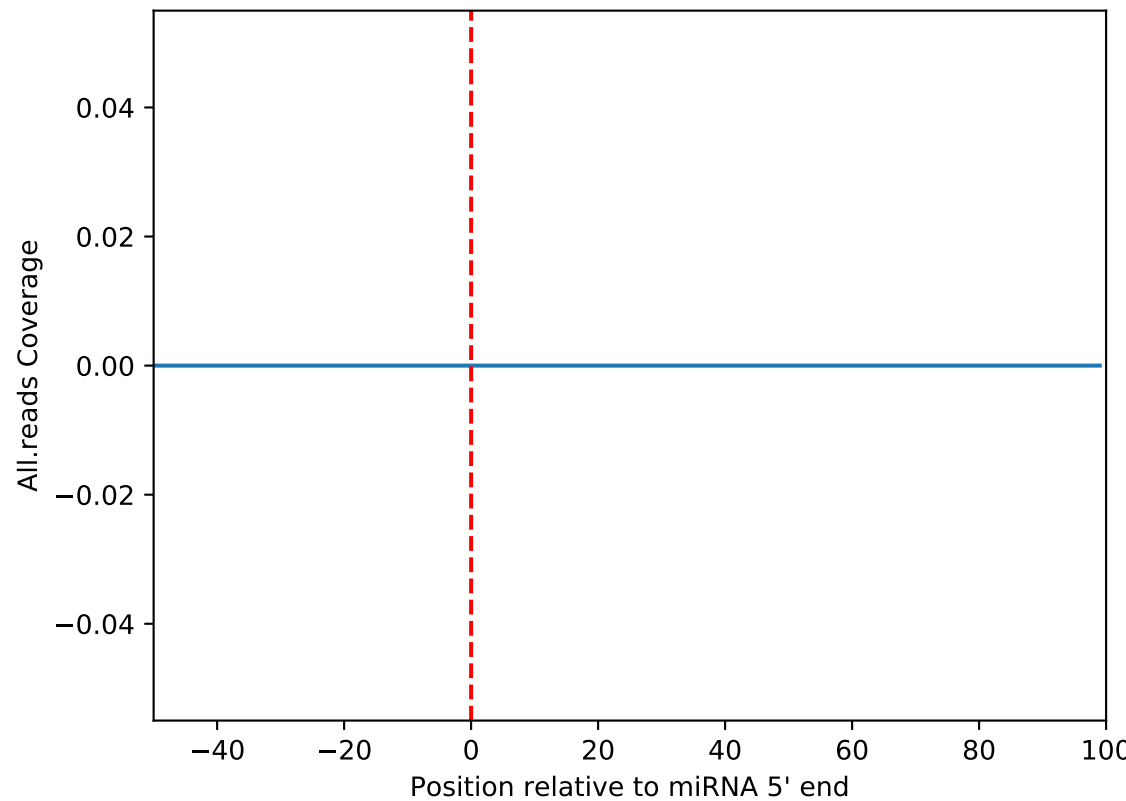

mir-2279 (chr2R:2552252(-))

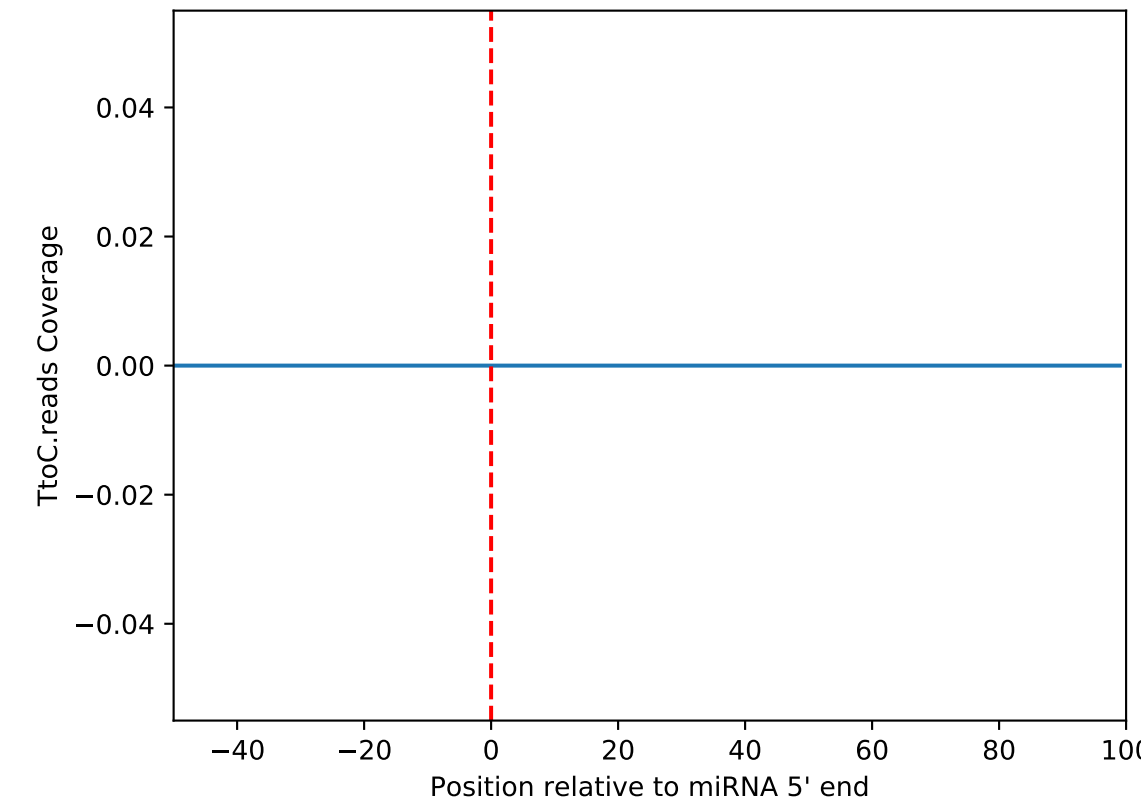

mir-2279 (chr2R:2552252(-))

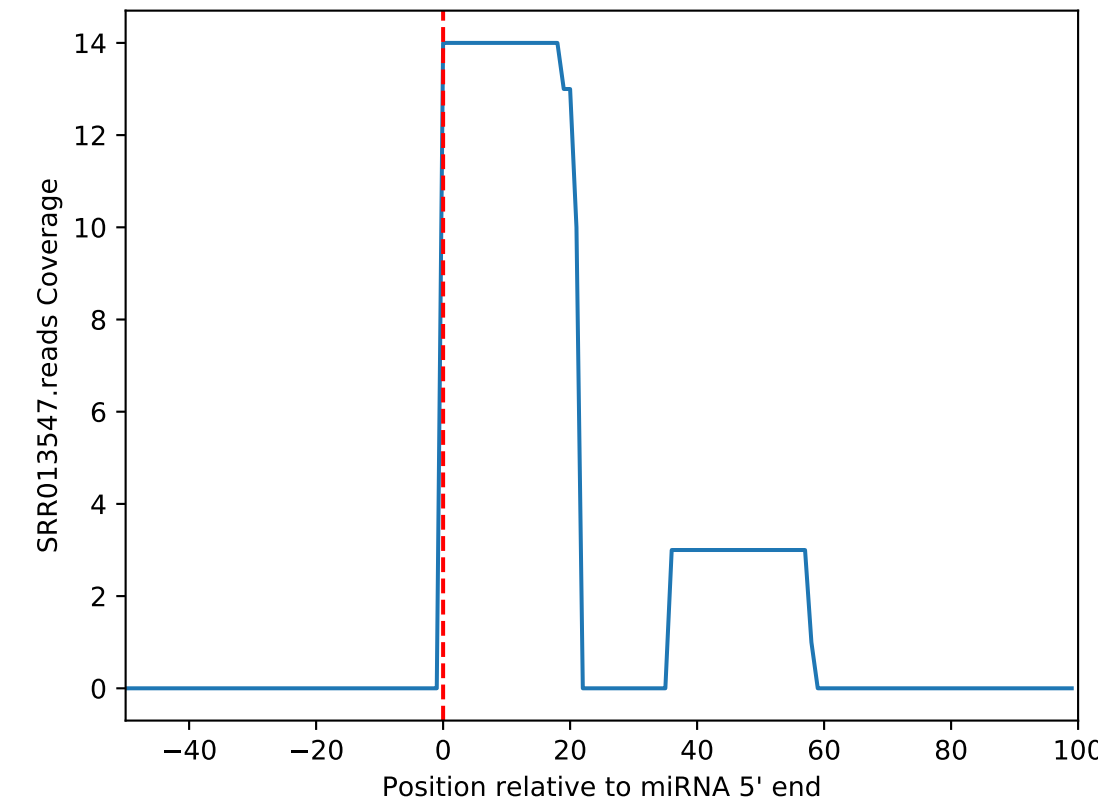

mir-2279 (chr2R:2552252(-))

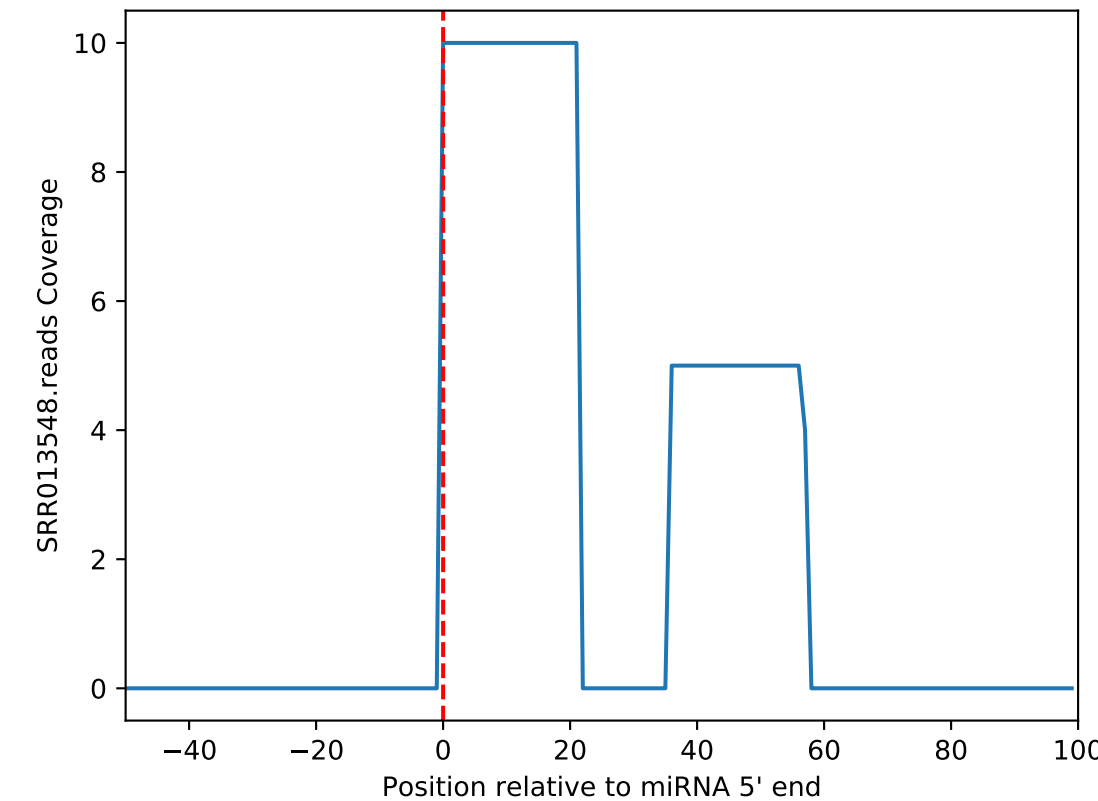

mir-4976 (chr2R:6835614(-))



mir-4976 (chr2R:6835614(-))



mir-4976 (chr2R:6835614(-))



mir-4976 (chr2R:6835614(-))

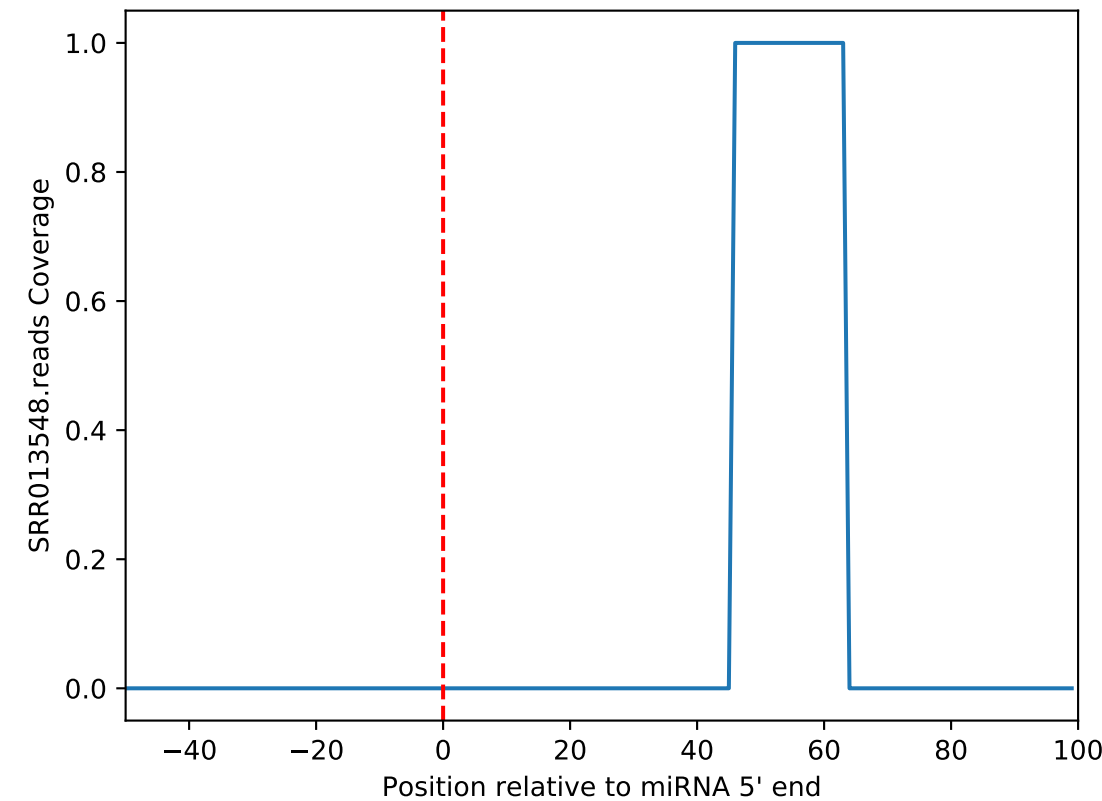

mir-989 (chr2R:14145508(-))



mir-989 (chr2R:14145508(-))



mir-989 (chr2R:14145508(-))



mir-989 (chr2R:14145508(-))



mir-4919 (chr2R:15945887(+))



mir-4919 (chr2R:15945887(+))



mir-4919 (chr2R:15945887(+))



mir-4919 (chr2R:15945887(+))

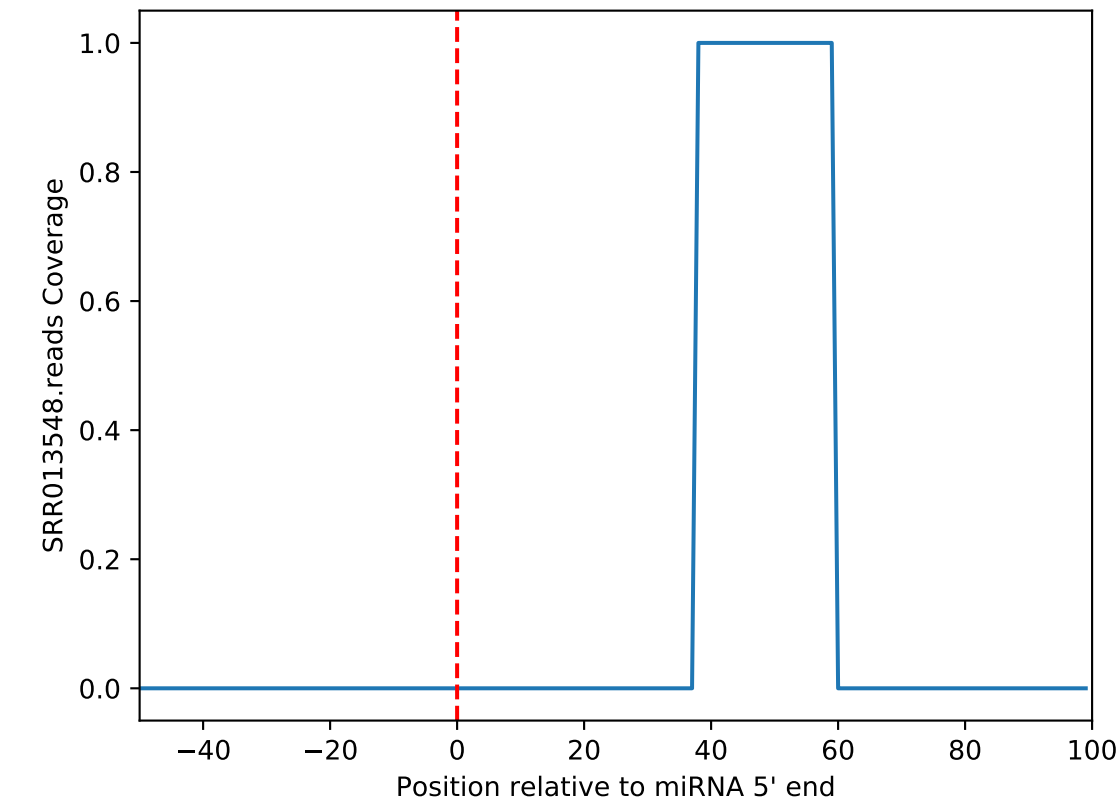

mir-990 (chr2R:16895295(-))



mir-990 (chr2R:16895295(-))



mir-990 (chr2R:16895295(-))



mir-990 (chr2R:16895295(-))



mir-4982 (chr2R:18720198(+))



mir-4982 (chr2R:18720198(+))



mir-4982 (chr2R:18720198(+))



mir-4982 (chr2R:18720198(+))

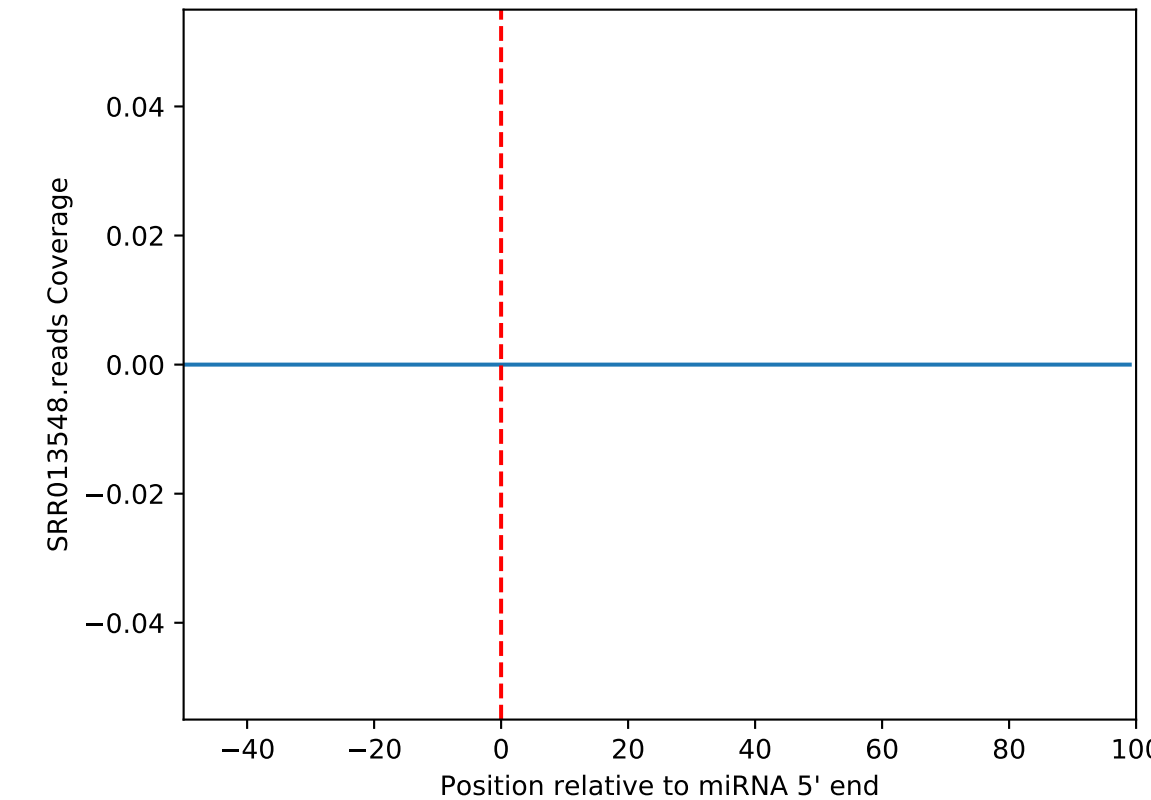

mir-4983 (chr2R:19637431(+))



mir-4983 (chr2R:19637431(+))



mir-4983 (chr2R:19637431(+))

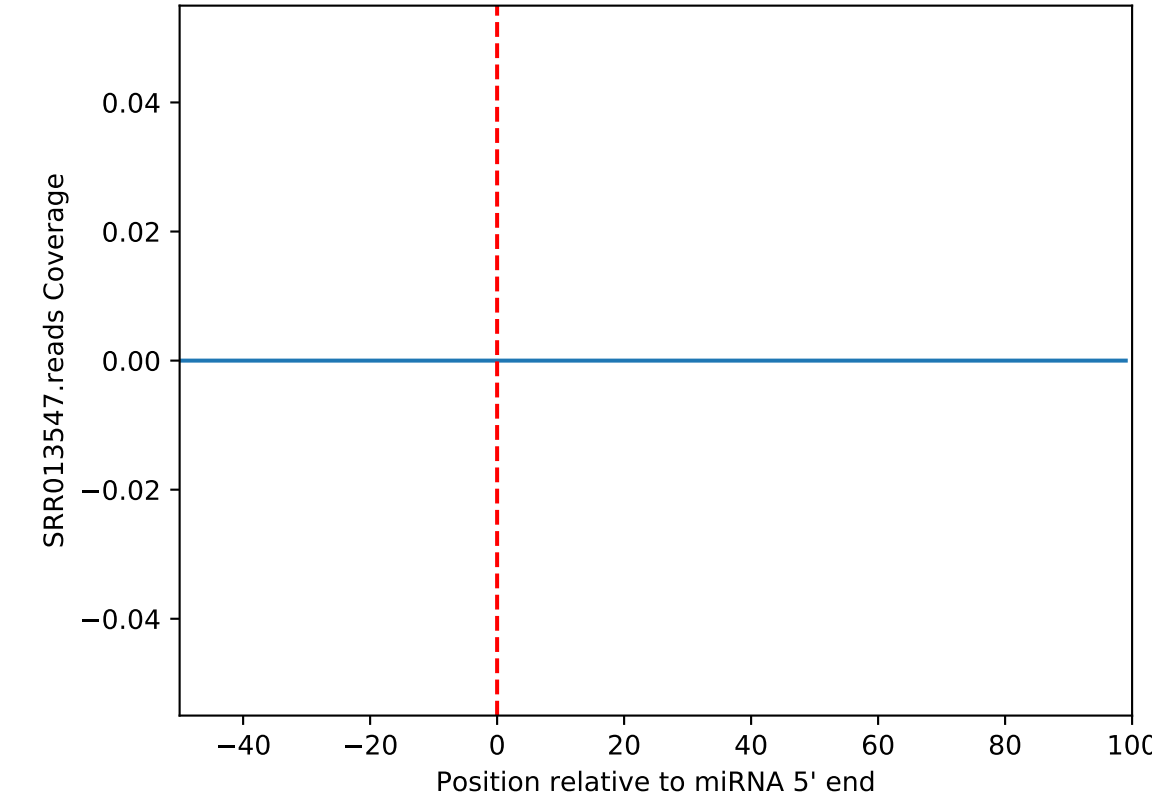

mir-4983 (chr2R:19637431(+))



mir-6-1 (chr2R:19661074(-))



mir-6-1 (chr2R:19661074(-))



mir-6-1 (chr2R:19661074(-))



mir-6-1 (chr2R:19661074(-))

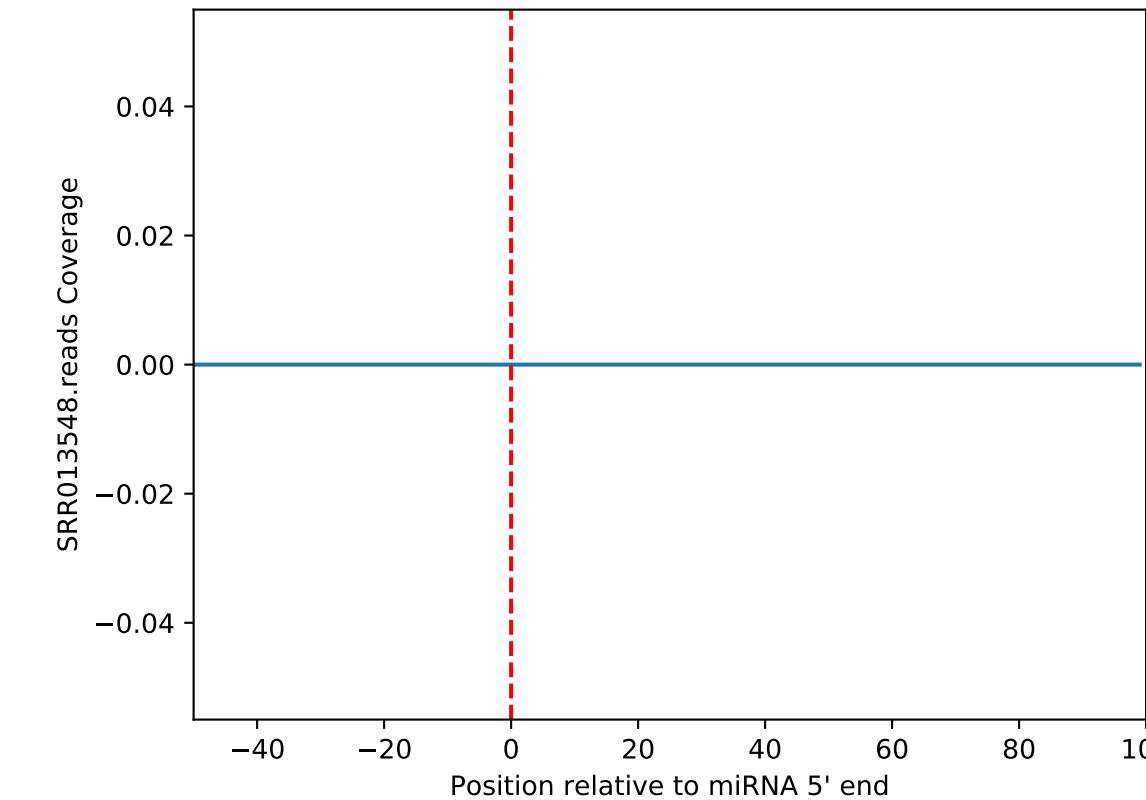



mir-5 (chr2R:19661222(-))



mir-5 (chr2R:19661222(-))



mir-5 (chr2R:19661222(-))

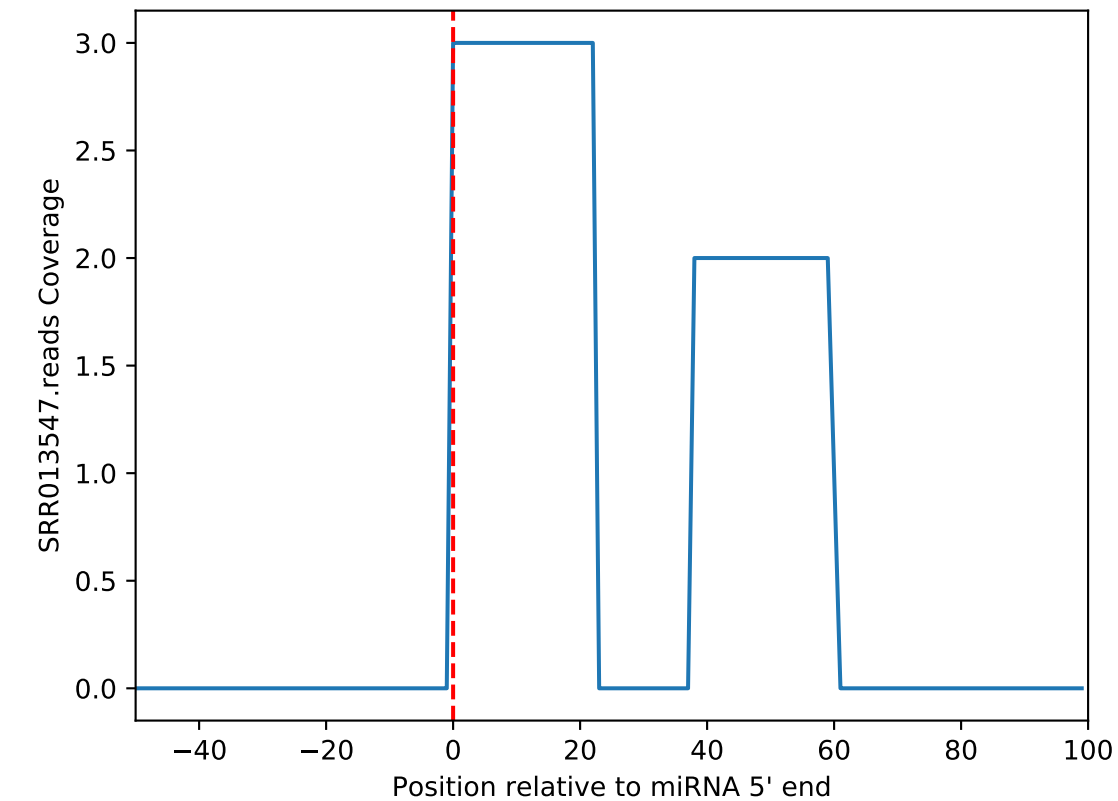

mir-5 (chr2R:19661222(-))

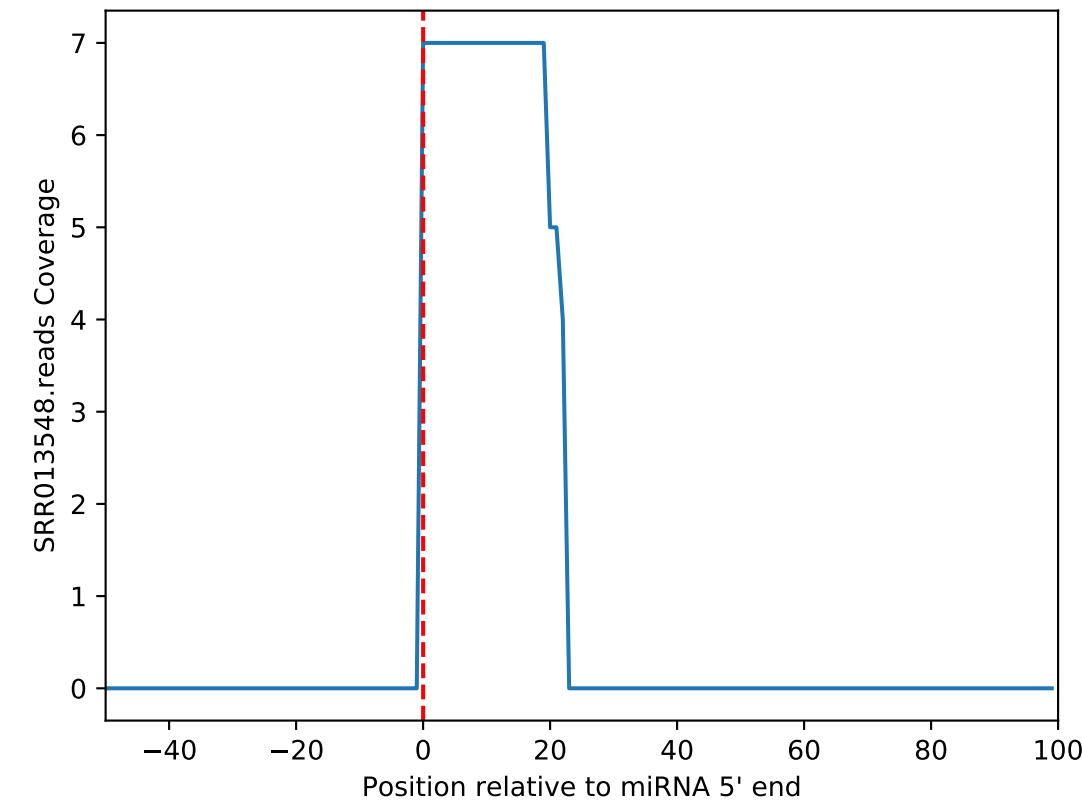

mir-4 (chr2R:19661356(-))



mir-4 (chr2R:19661356(-))



mir-4 (chr2R:19661356(-))

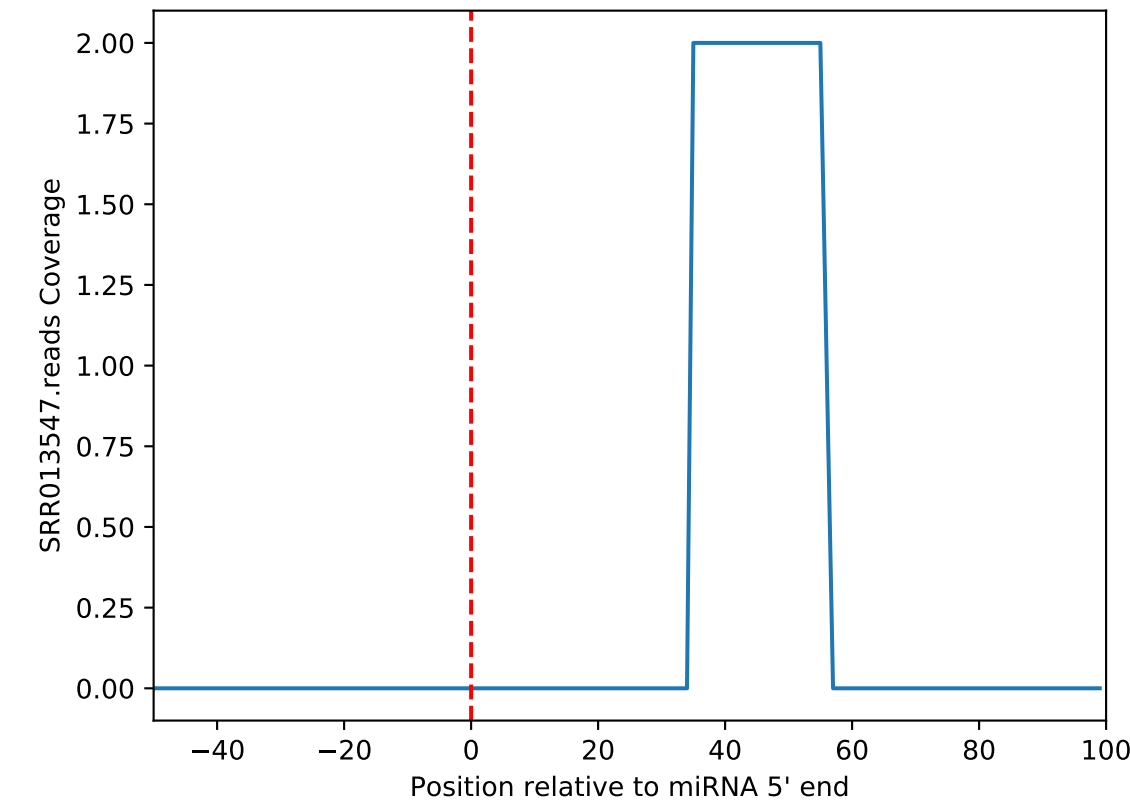

mir-4 (chr2R:19661356(-))

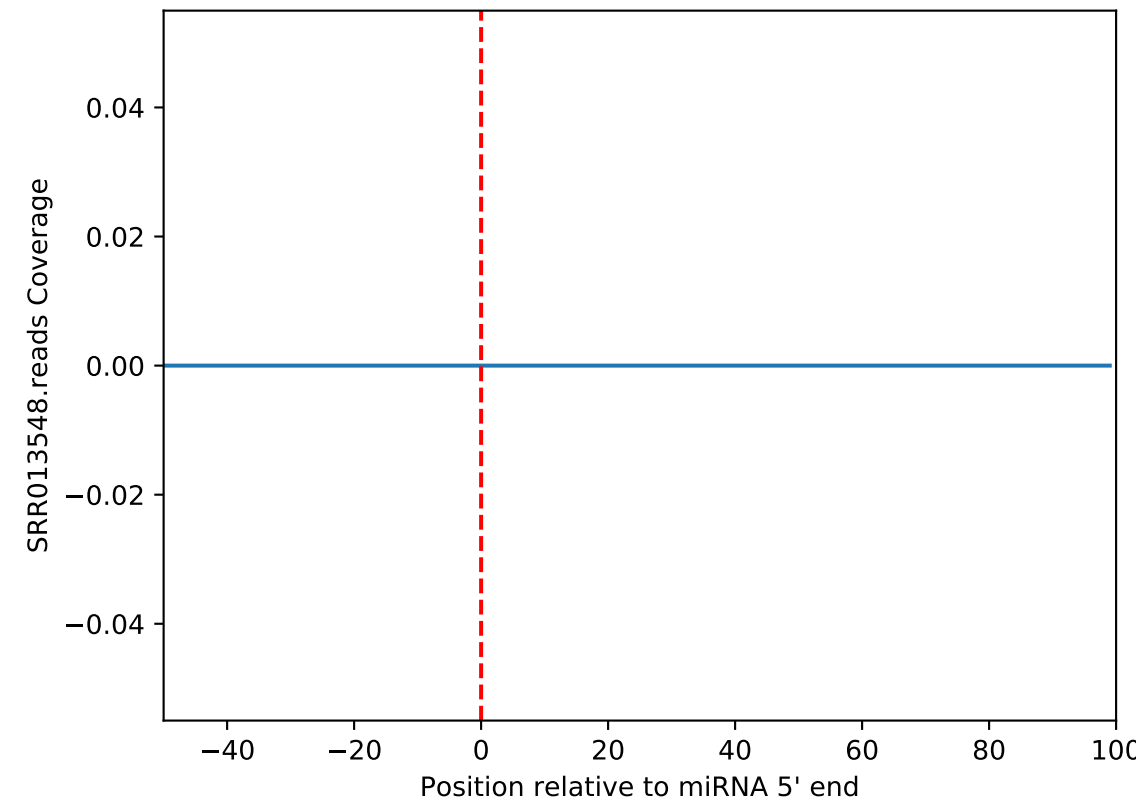

mir-286 (chr2R:19661509(-))



mir-286 (chr2R:19661509(-))



mir-286 (chr2R:19661509(-))

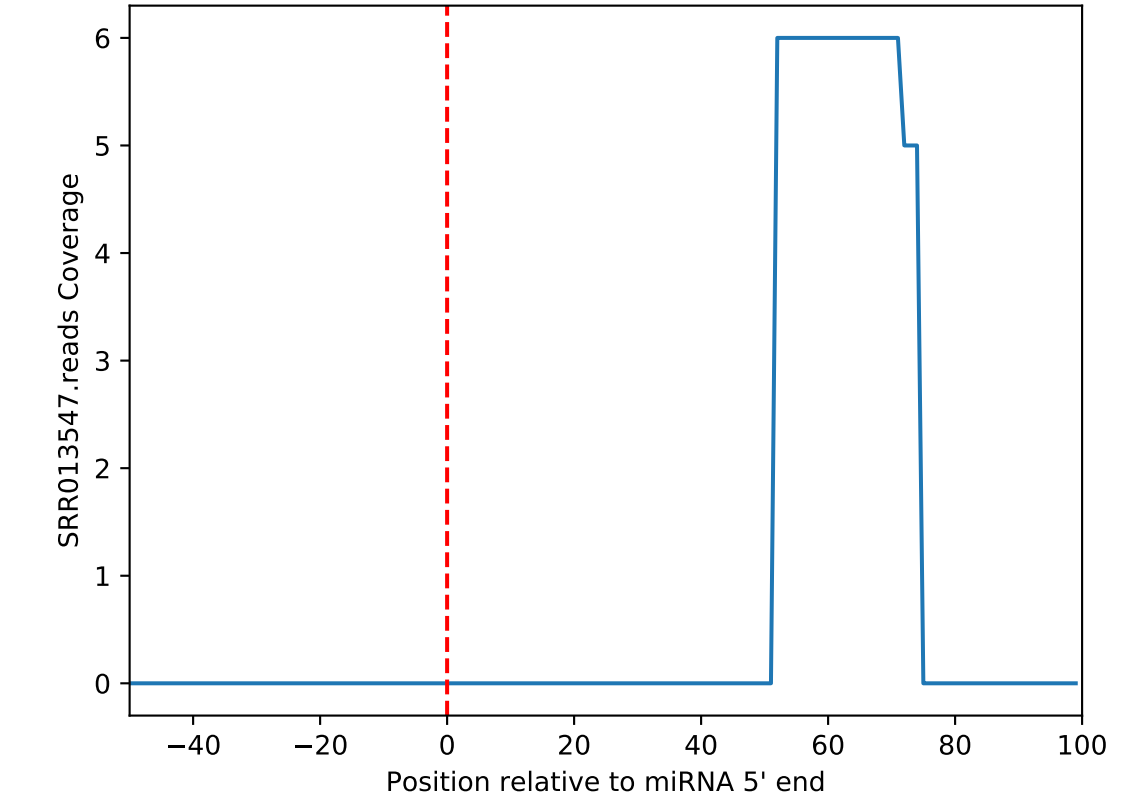

mir-286 (chr2R:19661509(-))

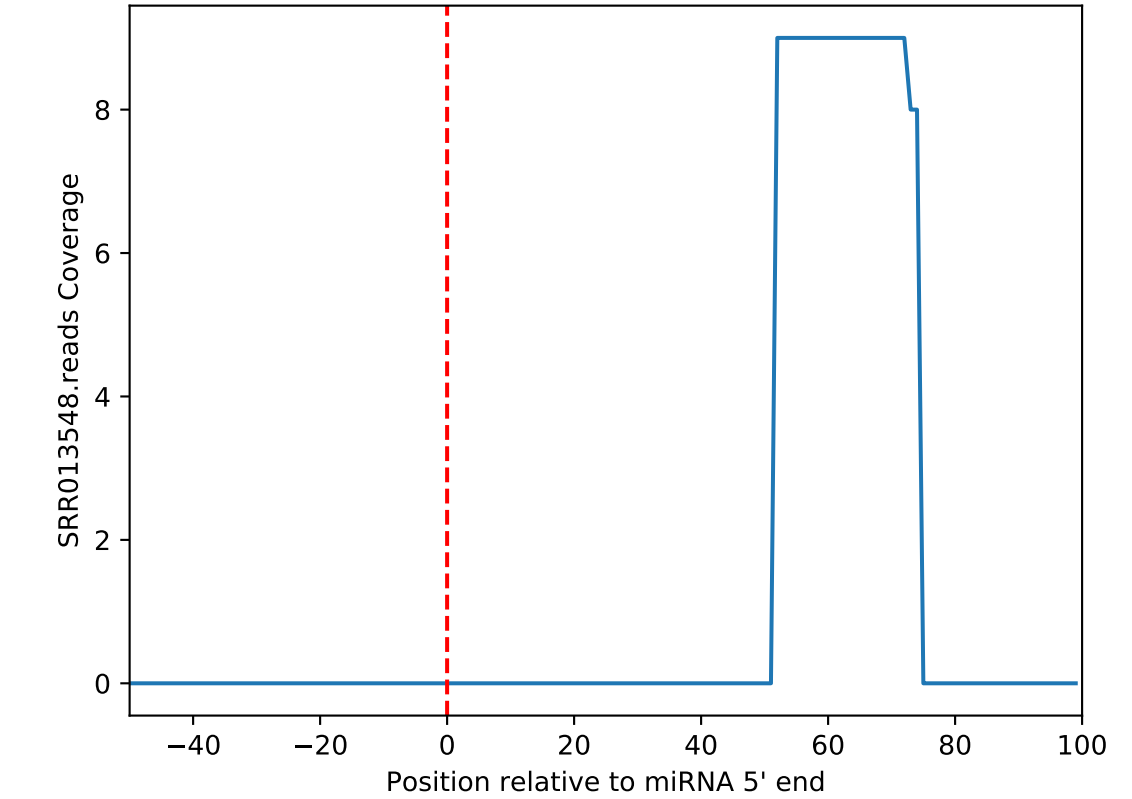

mir-4979 (chr2R:23734116(-))



mir-4979 (chr2R:23734116(-))



mir-4979 (chr2R:23734116(-))

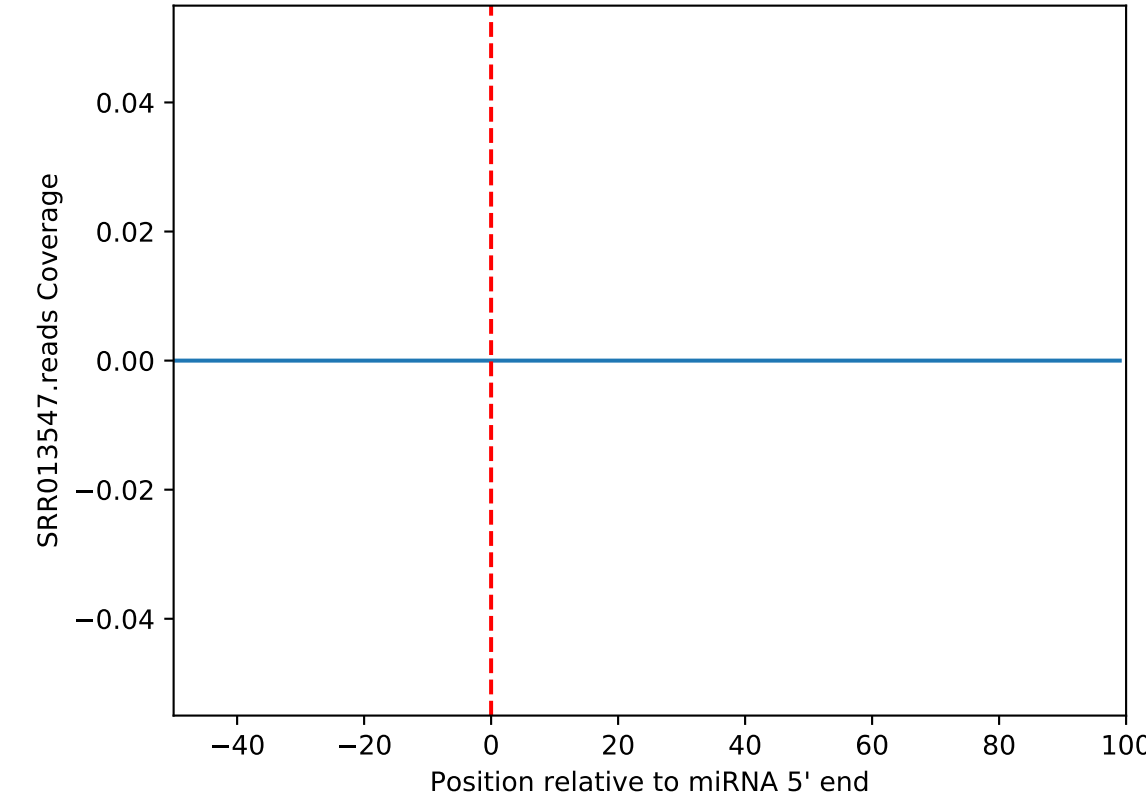

mir-4979 (chr2R:23734116(-))

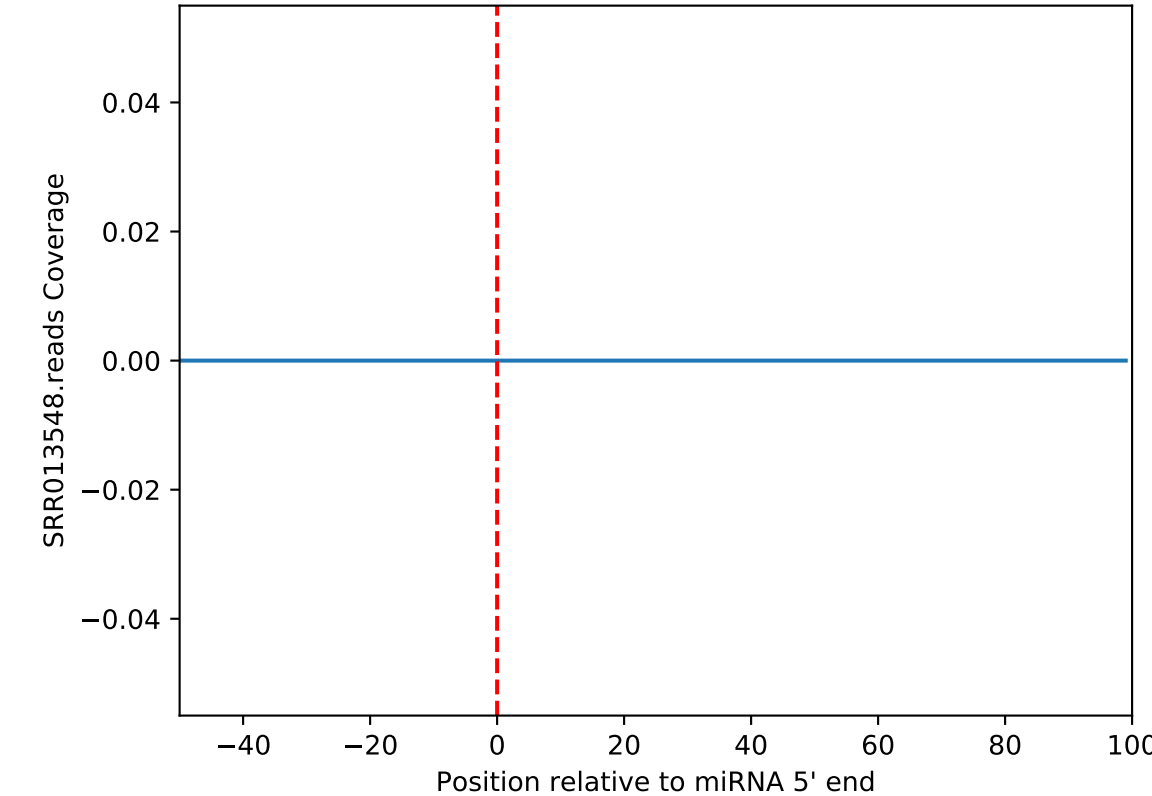

mir-4985 (chr2R:24294259(+))



mir-4985 (chr2R:24294259(+))

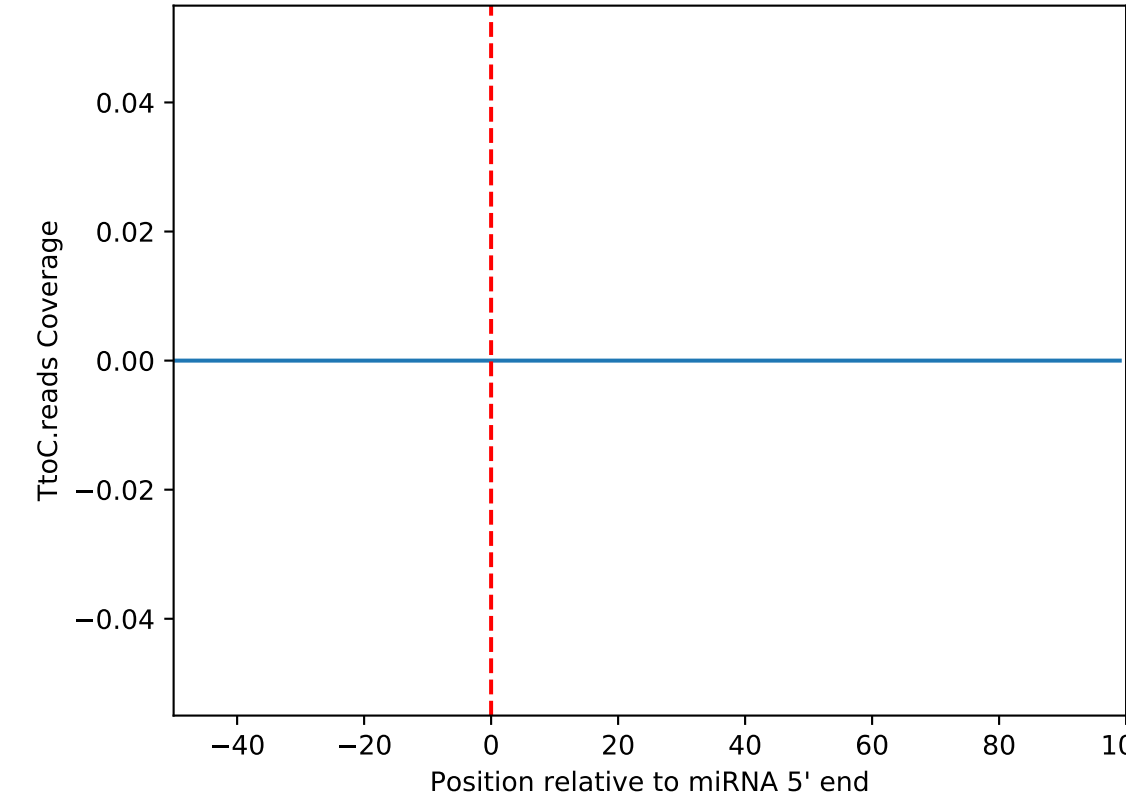

mir-4985 (chr2R:24294259(+))

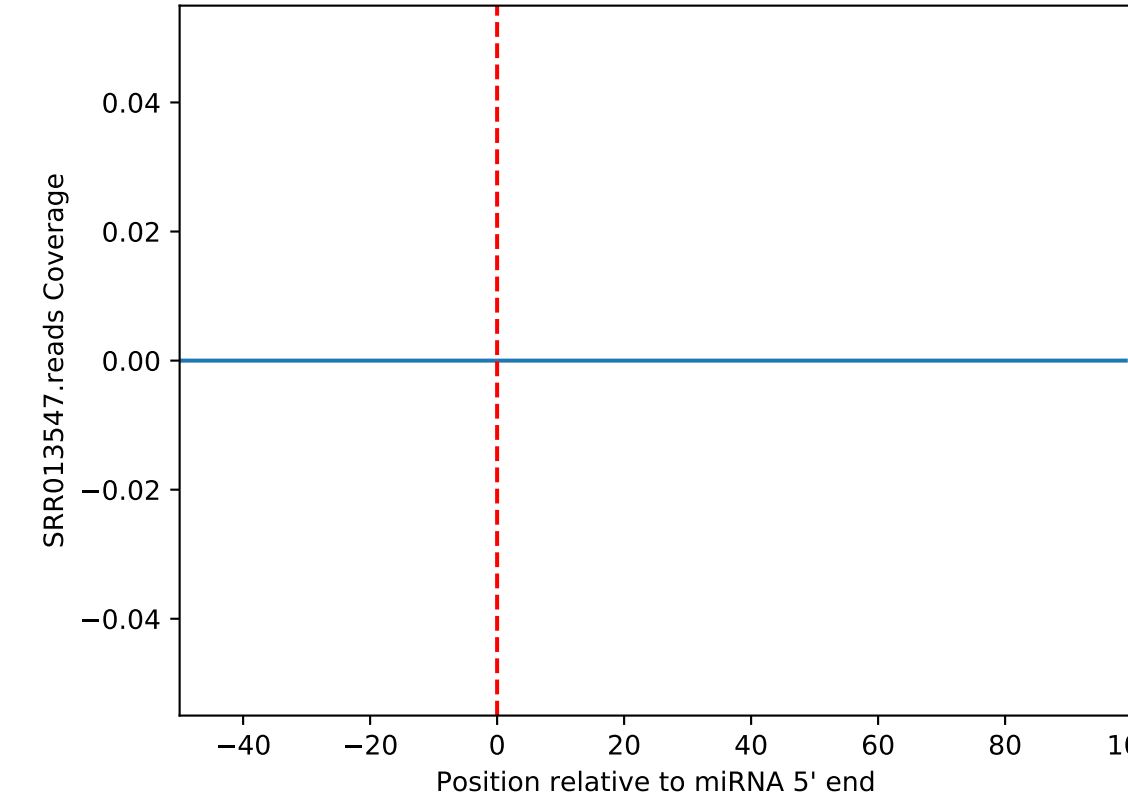

mir-4985 (chr2R:24294259(+))

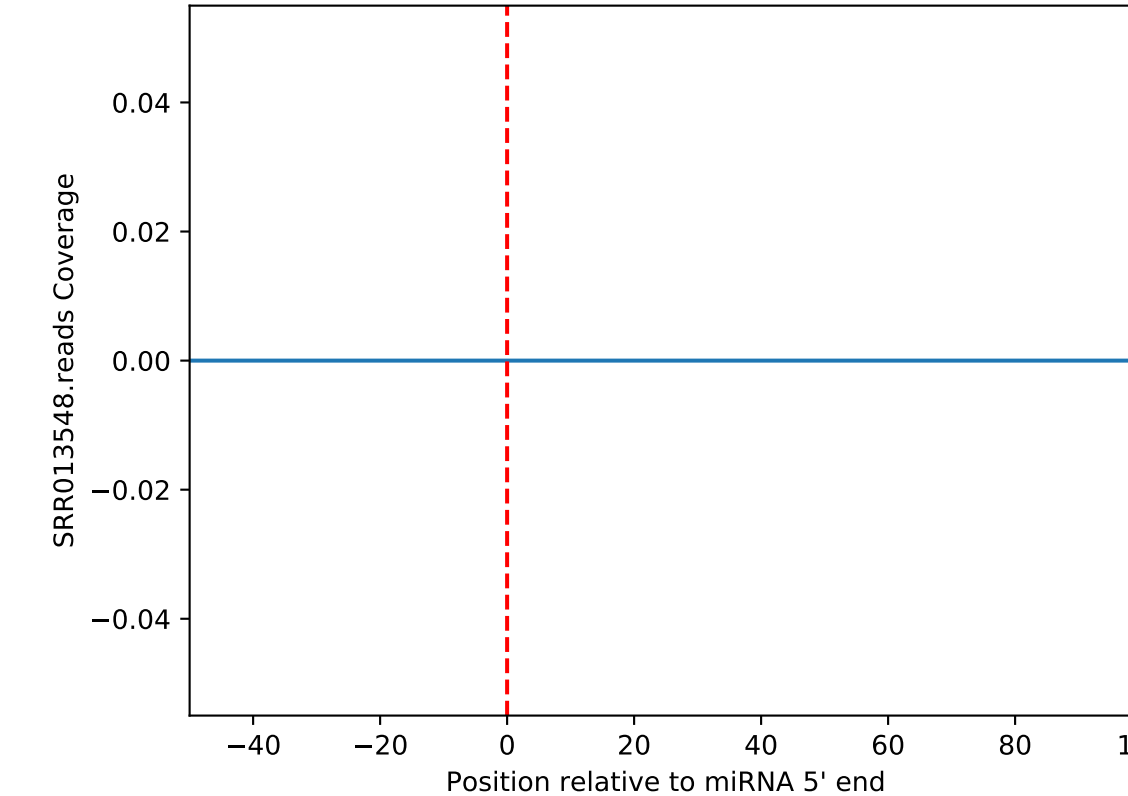

mir-4940 (chr3L:9144615(+))



mir-4940 (chr3L:9144615(+))



mir-4940 (chr3L:9144615(+))



mir-4940 (chr3L:9144615(+))



mir-4986 (chr3L:9733750(-))



mir-4986 (chr3L:9733750(-))



mir-4986 (chr3L:9733750(-))



mir-4986 (chr3L:9733750(-))

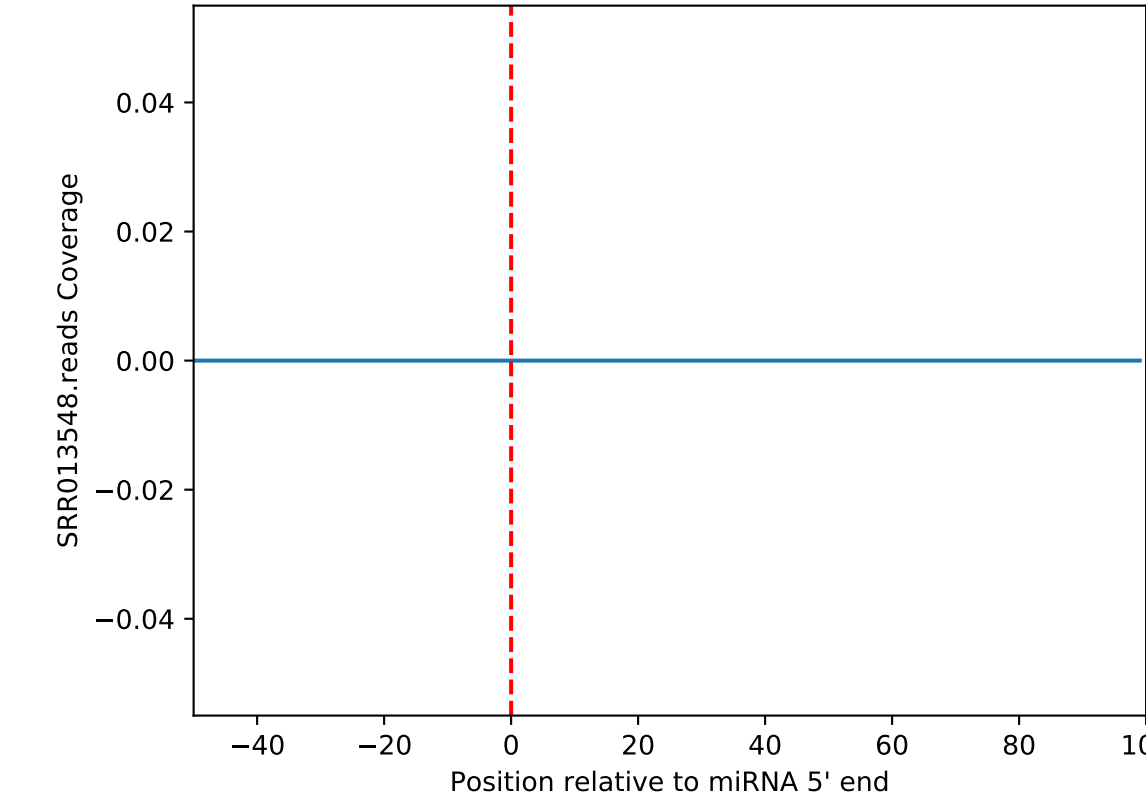

mir-219 (chr3L:17315024(+))



mir-219 (chr3L:17315024(+))



mir-219 (chr3L:17315024(+))



mir-219 (chr3L:17315024(+))





mir-193 (chr3L:21574032(+))



mir-193 (chr3L:21574032(+))



mir-193 (chr3L:21574032(+))

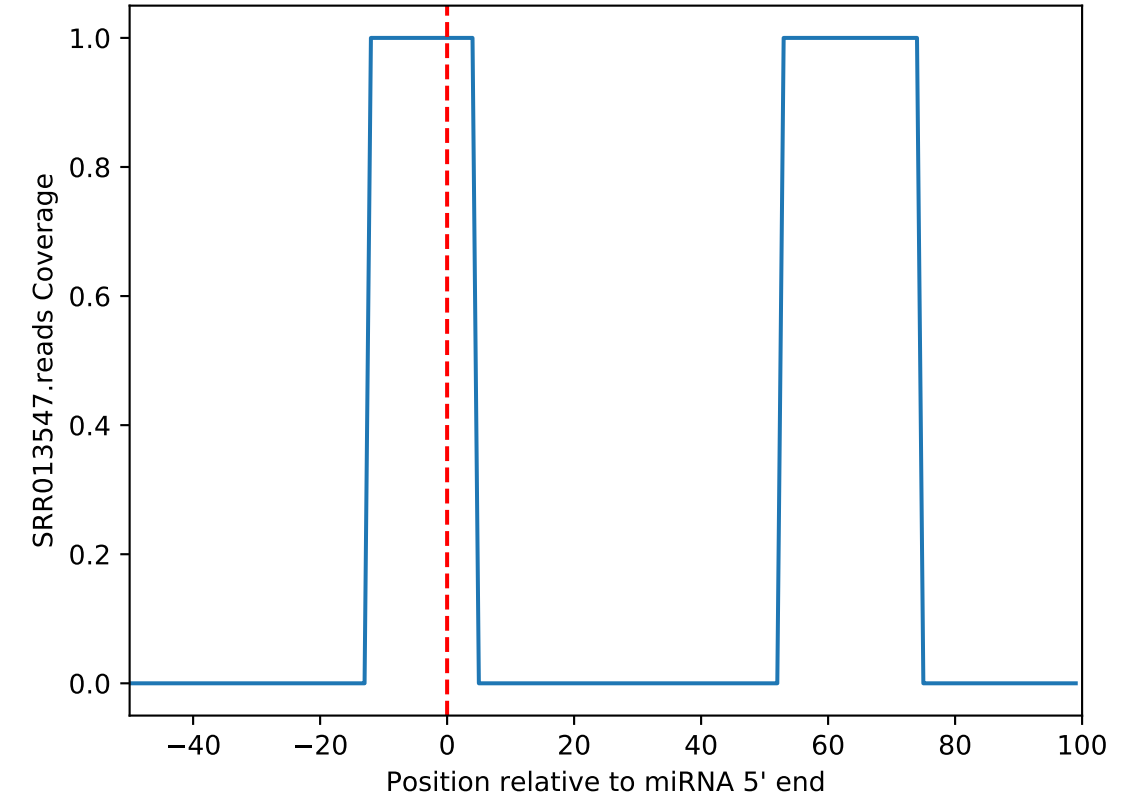

mir-193 (chr3L:21574032(+))

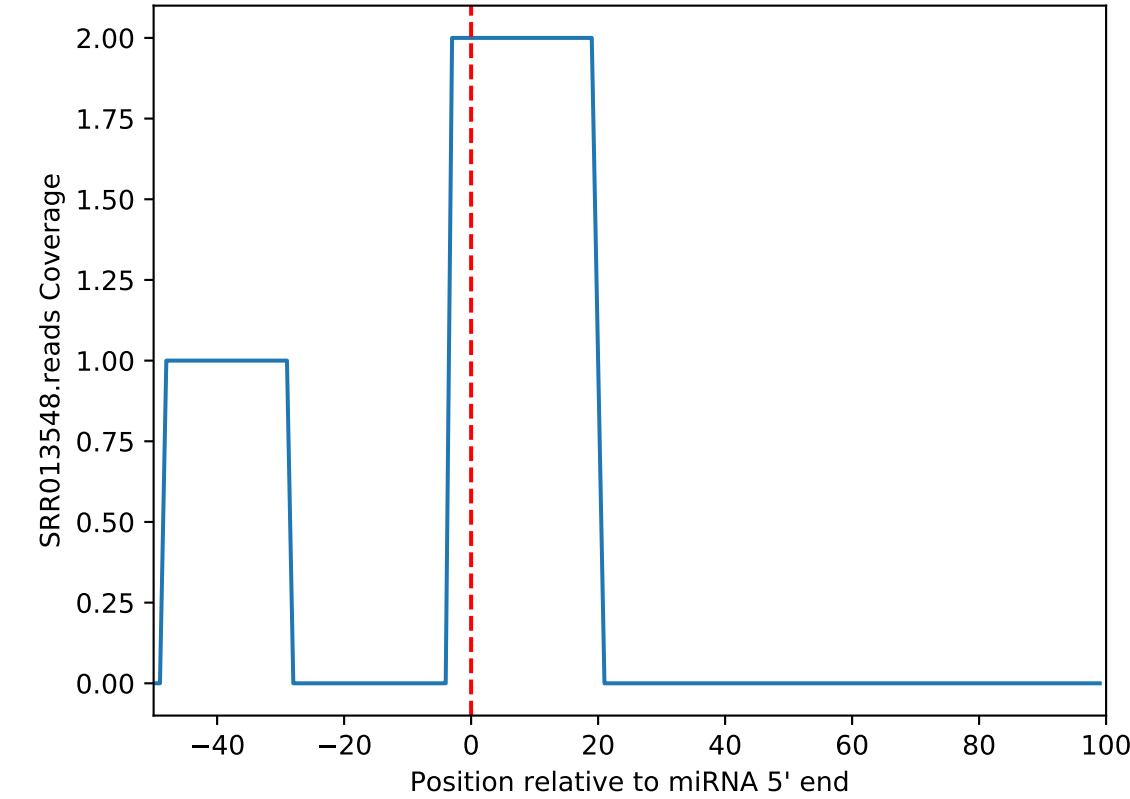

mir-9375 (chr3R:6451609(-))



mir-9375 (chr3R:6451609(-))



mir-9375 (chr3R:6451609(-))



mir-9375 (chr3R:6451609(-))



mir-4950 (chr3R:7451465(+))



mir-4950 (chr3R:7451465(+))



mir-4950 (chr3R:7451465(+))



mir-4950 (chr3R:7451465(+))



mir-9380 (chr3R:8348778(-))



mir-9380 (chr3R:8348778(-))



mir-9380 (chr3R:8348778(-))

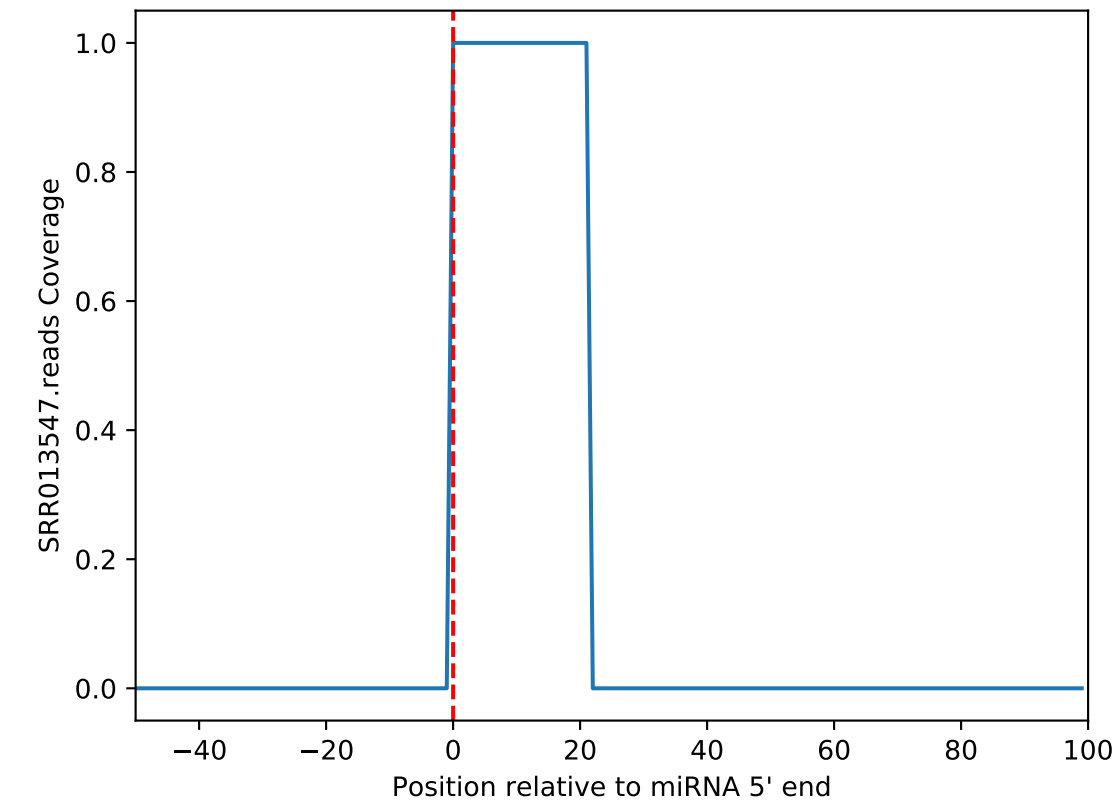

mir-9380 (chr3R:8348778(-))

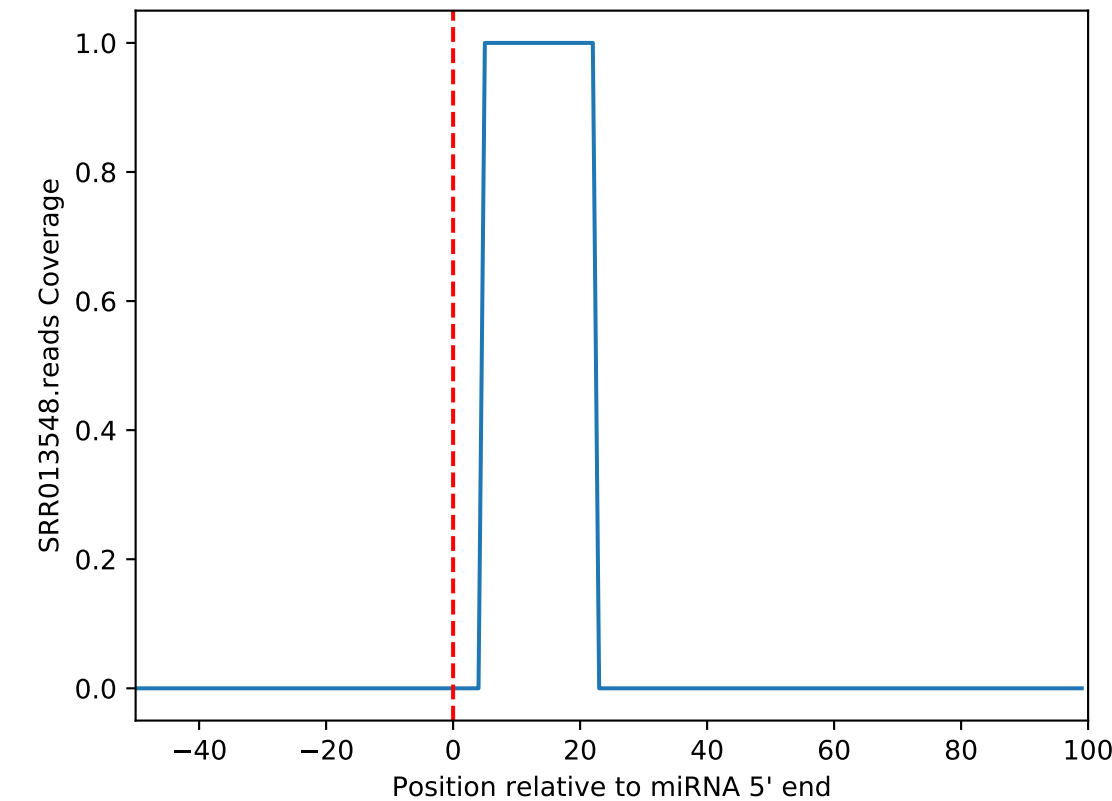

mir-9371 (chr3R:9989120(+))



mir-9371 (chr3R:9989120(+))



mir-9371 (chr3R:9989120(+))



mir-9371 (chr3R:9989120(+))

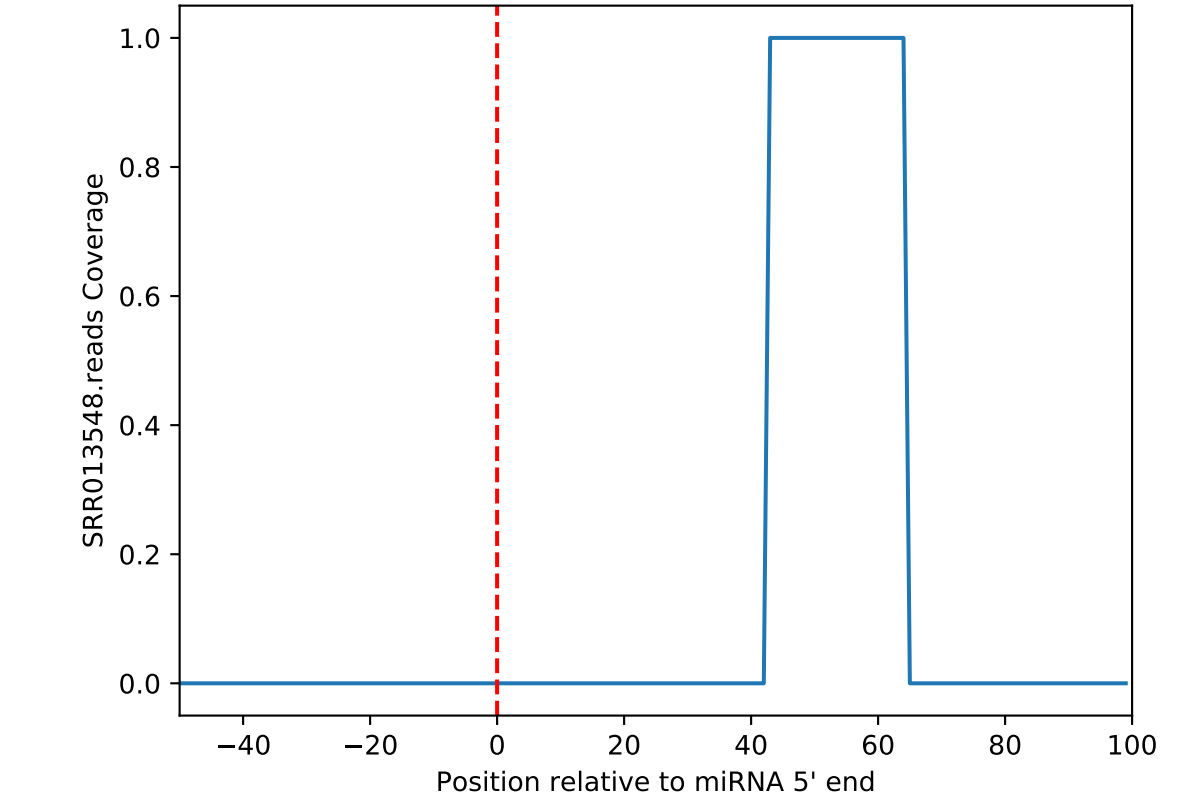

mir-994 (chr3R:10408148(+))



mir-994 (chr3R:10408148(+))



mir-994 (chr3R:10408148(+))



mir-994 (chr3R:10408148(+))

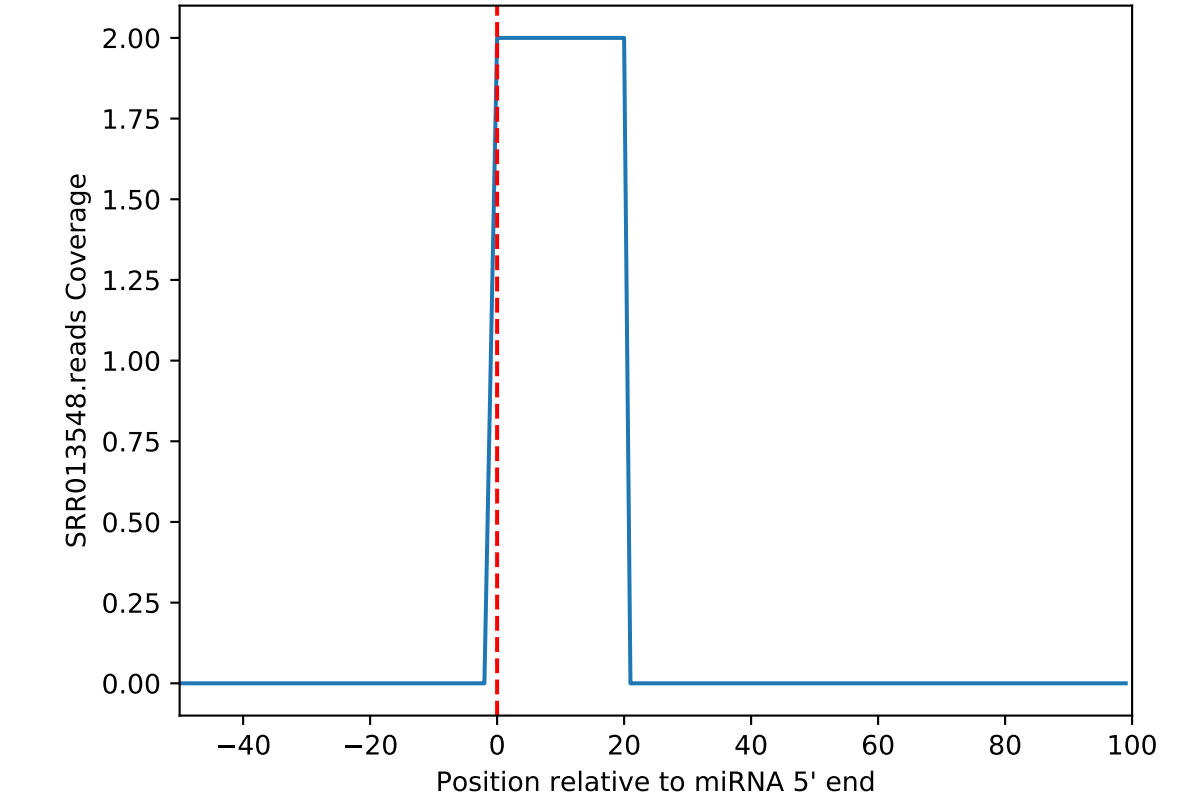

mir-4944 (chr3R:10513096(-))

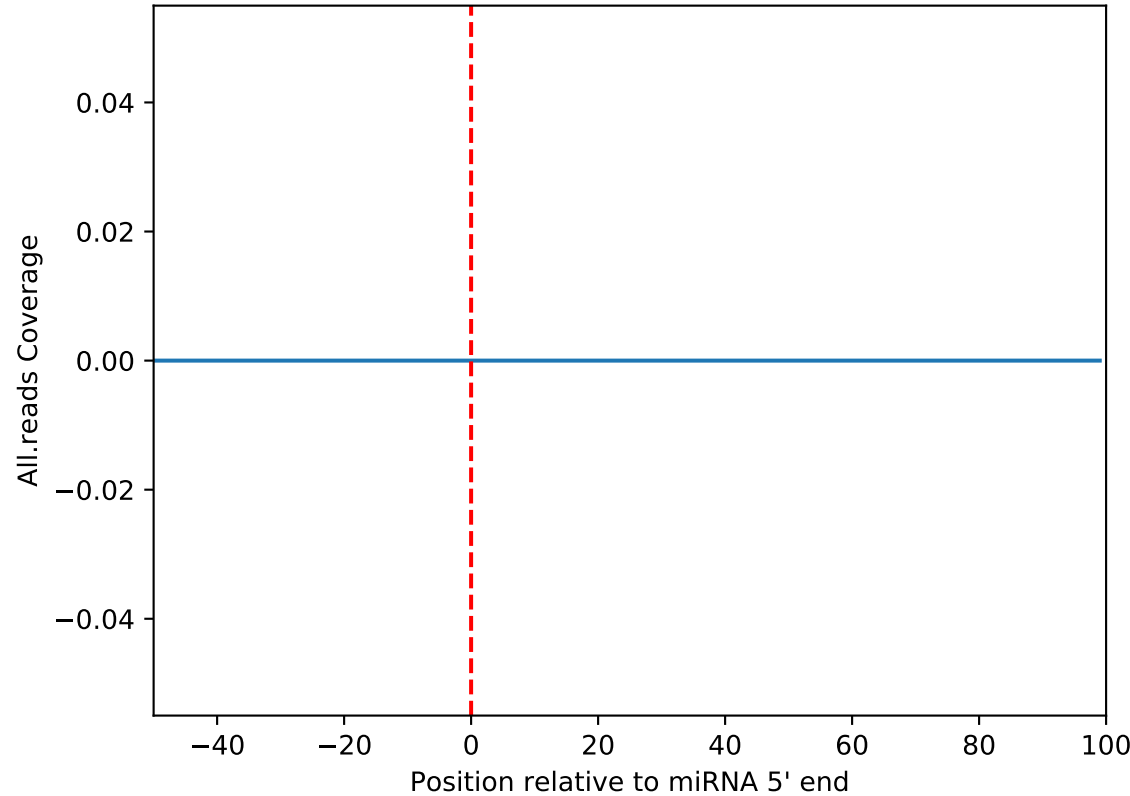

mir-4944 (chr3R:10513096(-))

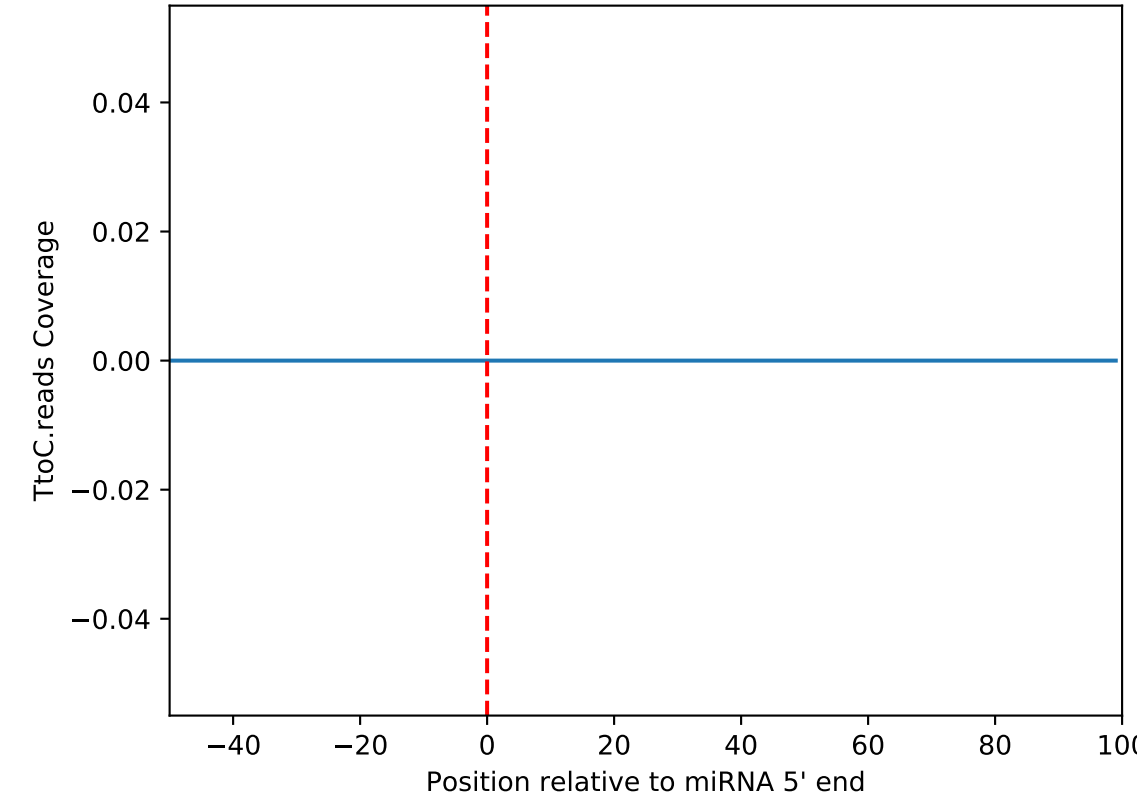

mir-4944 (chr3R:10513096(-))

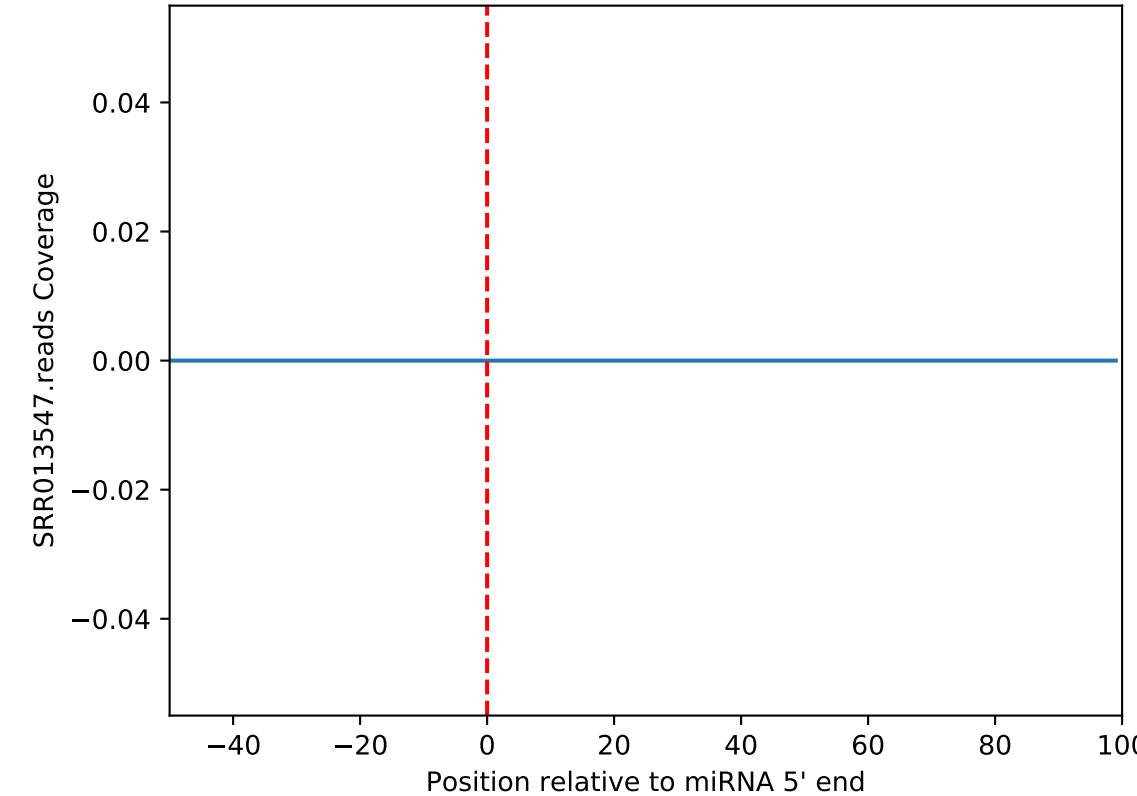

mir-4944 (chr3R:10513096(-))

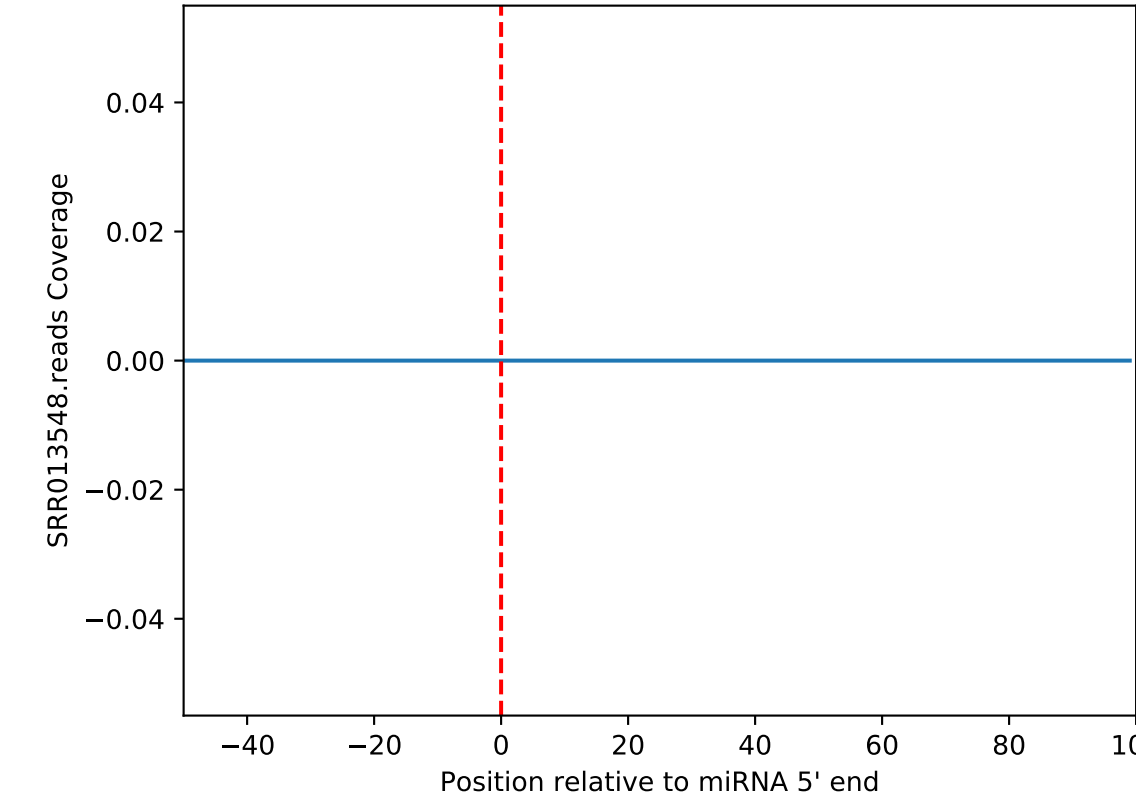

mir-2493 (chr3R:15130837(-))



mir-2493 (chr3R:15130837(-))



mir-2493 (chr3R:15130837(-))

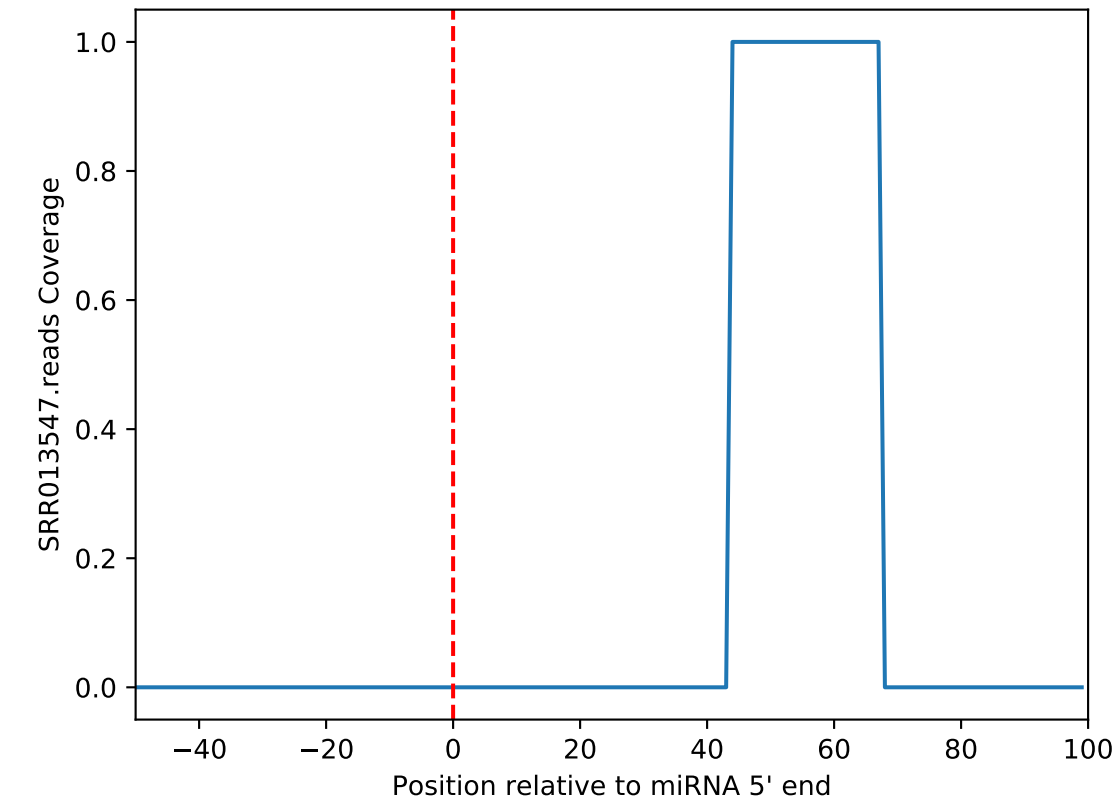

mir-2493 (chr3R:15130837(-))

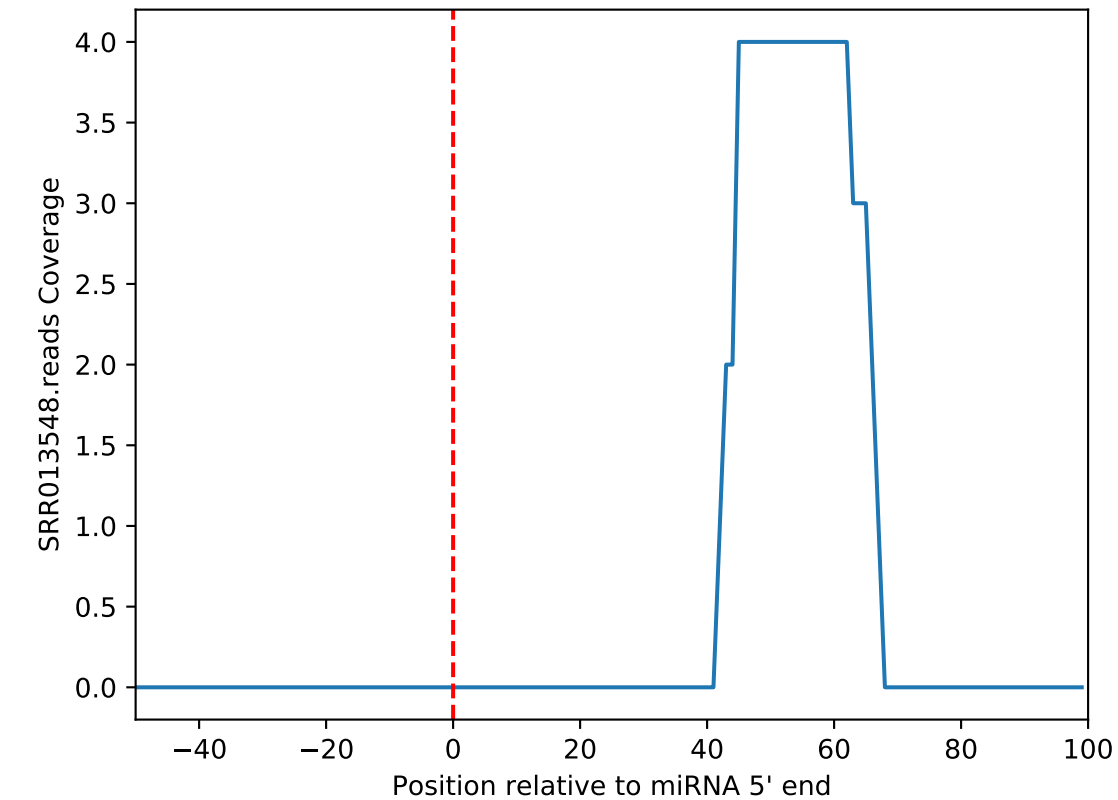



mir-4951 (chr3R:21316746(+))



mir-4951 (chr3R:21316746(+))

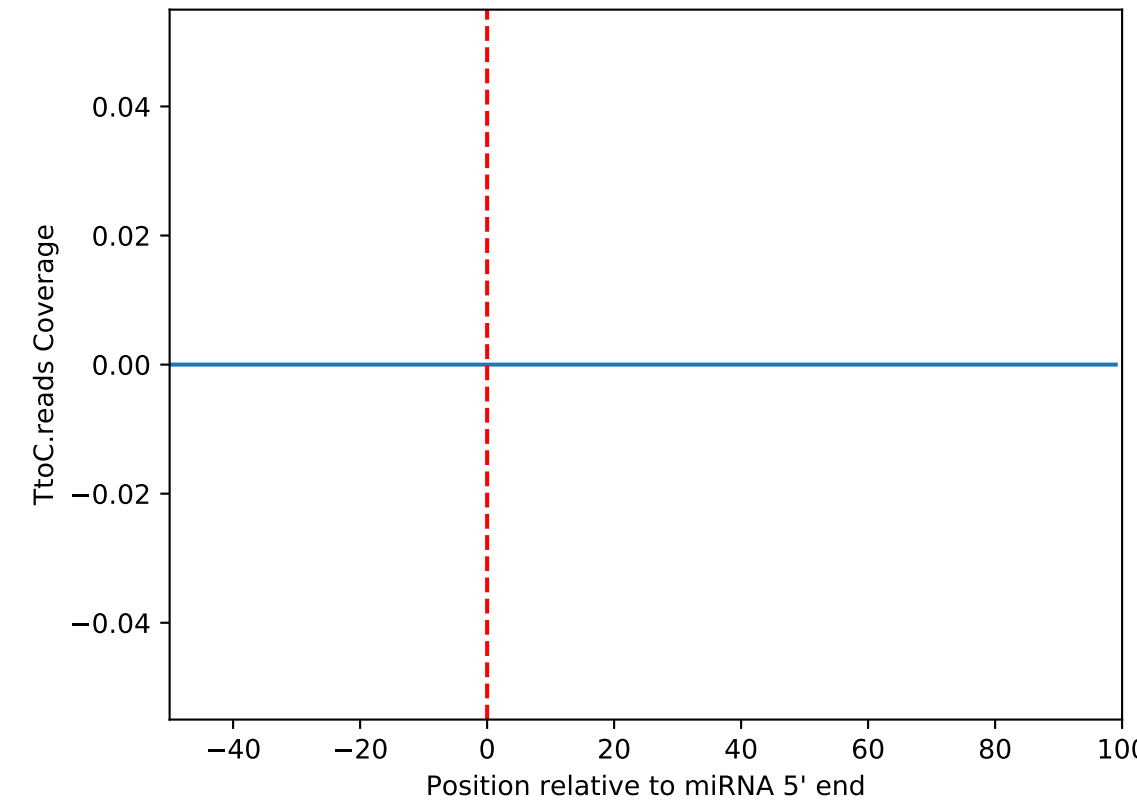

mir-4951 (chr3R:21316746(+))

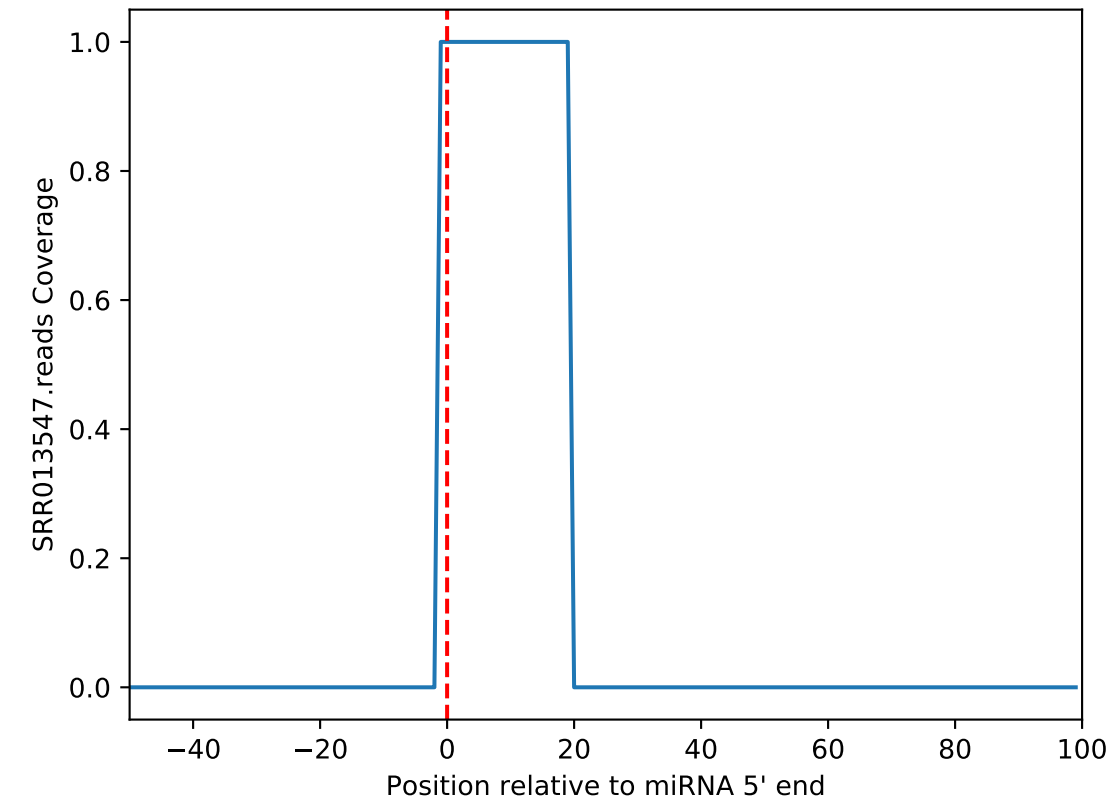

mir-4951 (chr3R:21316746(+))

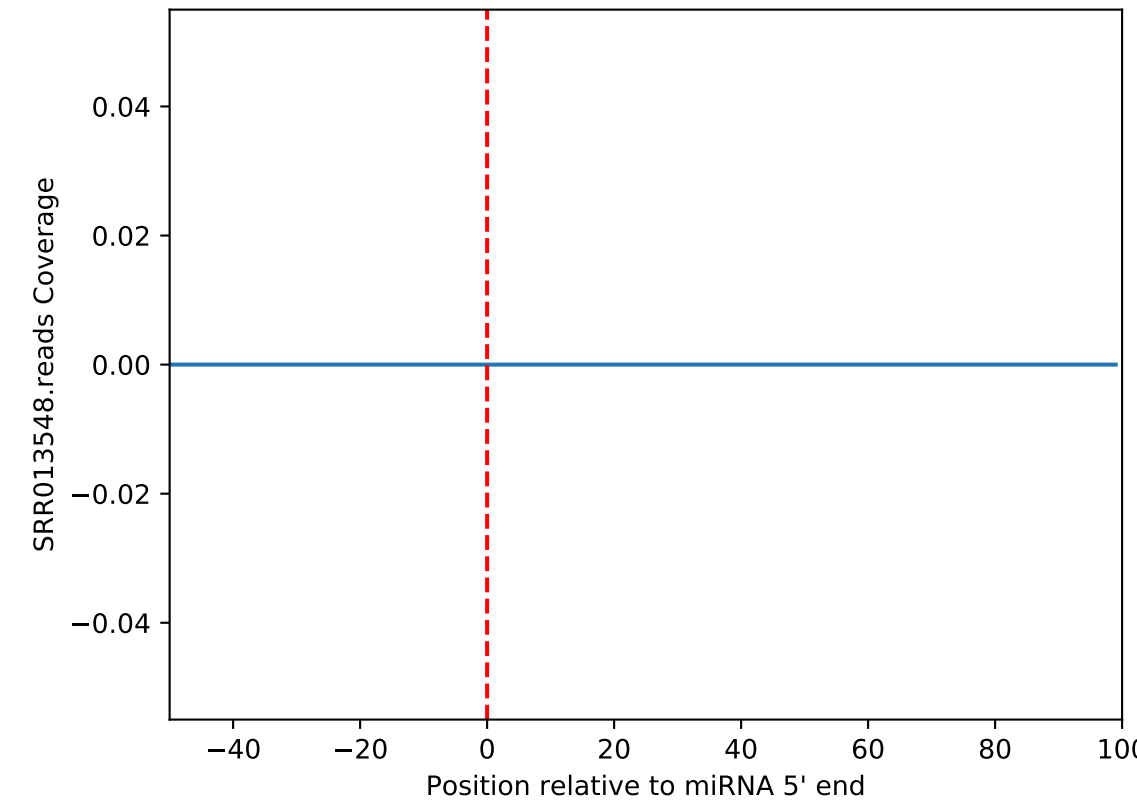

mir-1000 (chr3R:25588944(-))



mir-1000 (chr3R:25588944(-))



mir-1000 (chr3R:25588944(-))

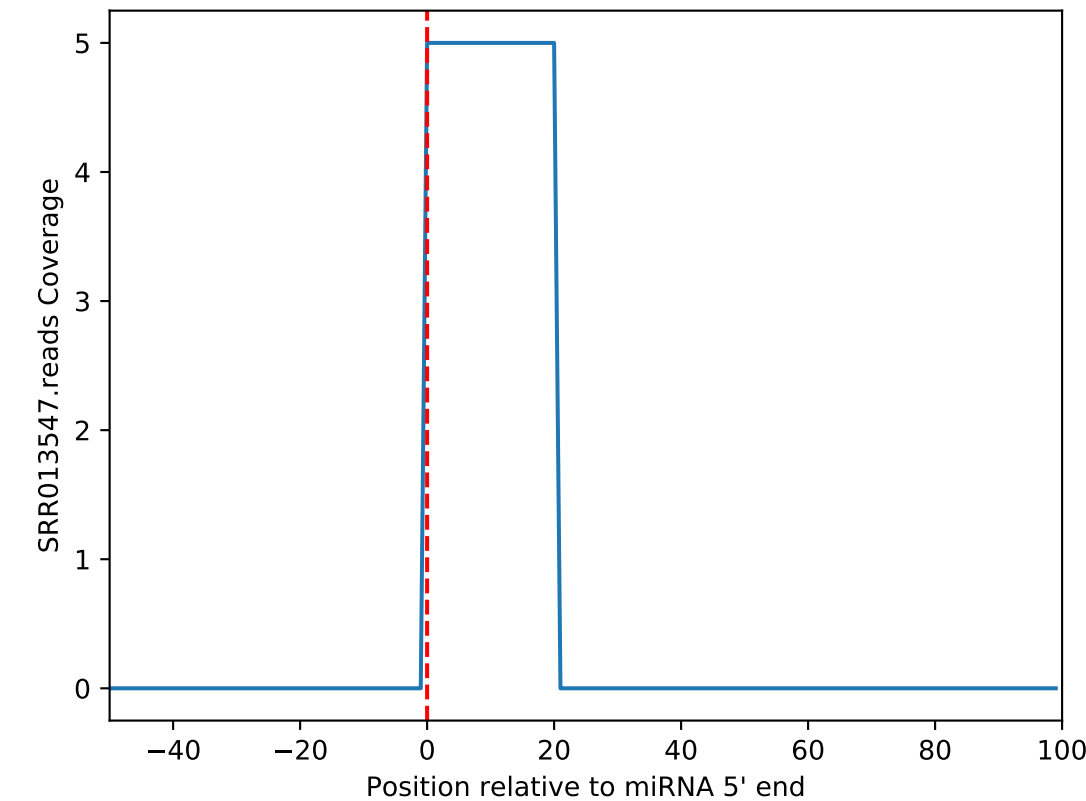

mir-1000 (chr3R:25588944(-))

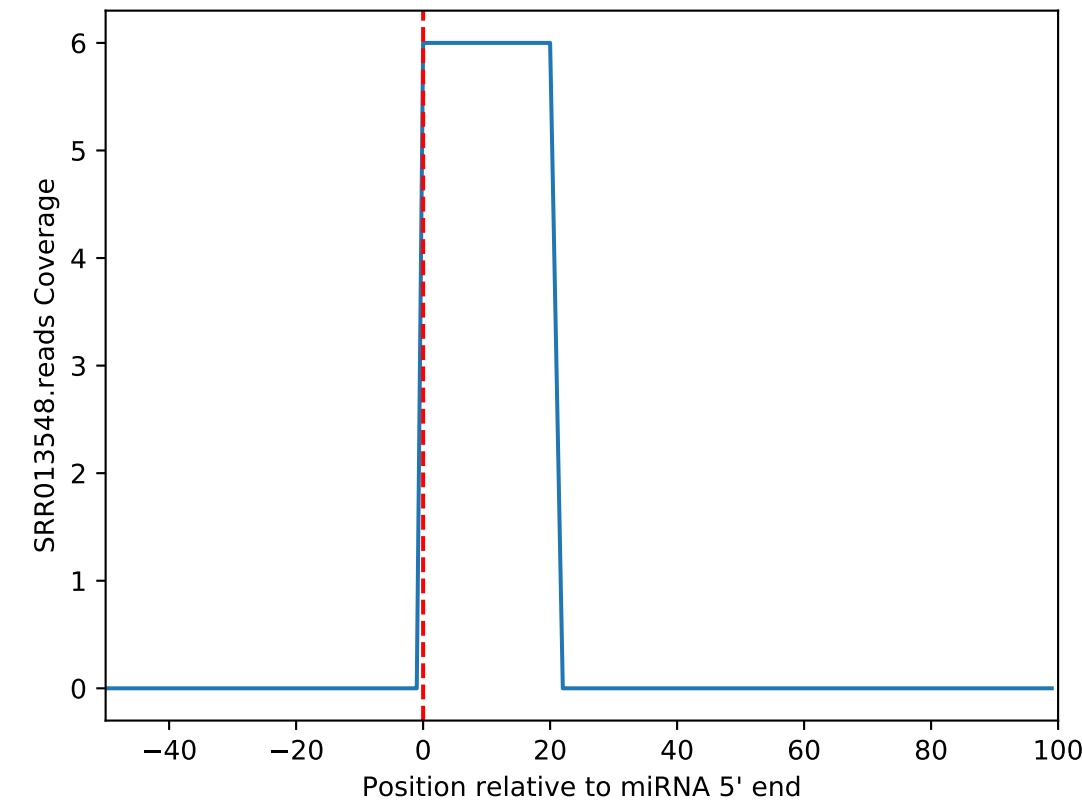

mir-1001 (chr3R:27642540(-))



mir-1001 (chr3R:27642540(-))



mir-1001 (chr3R:27642540(-))

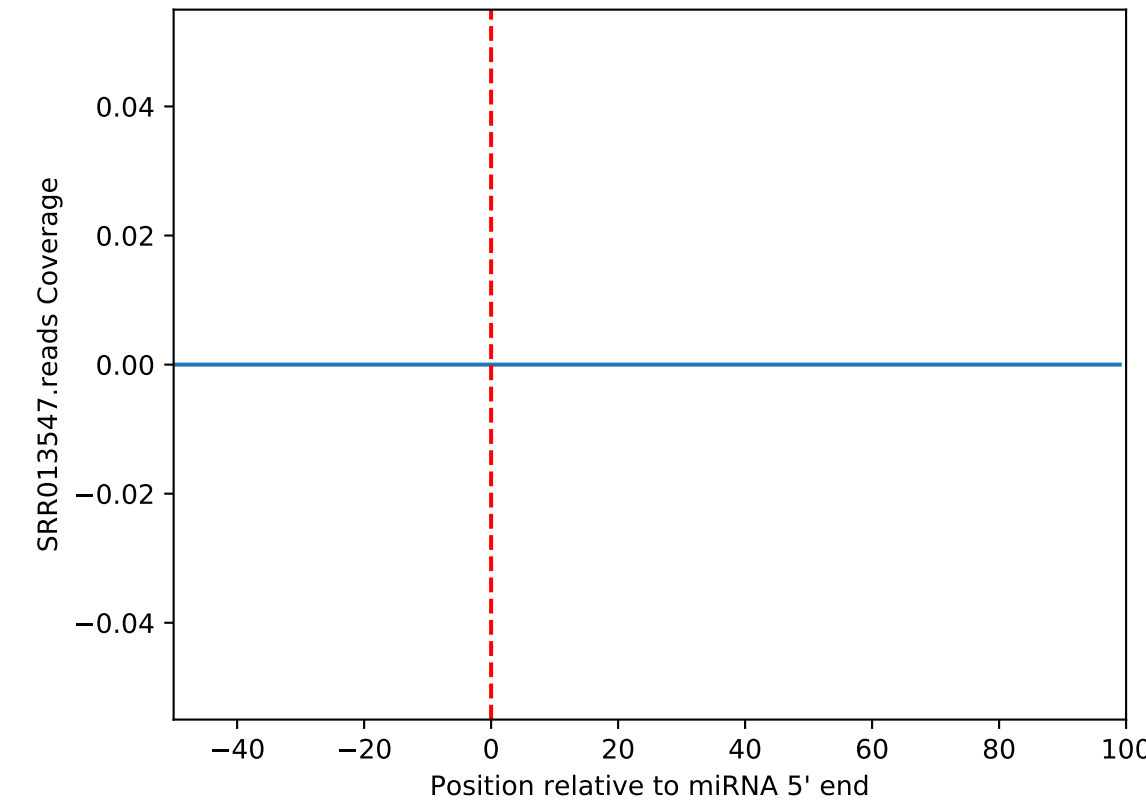

mir-1001 (chr3R:27642540(-))

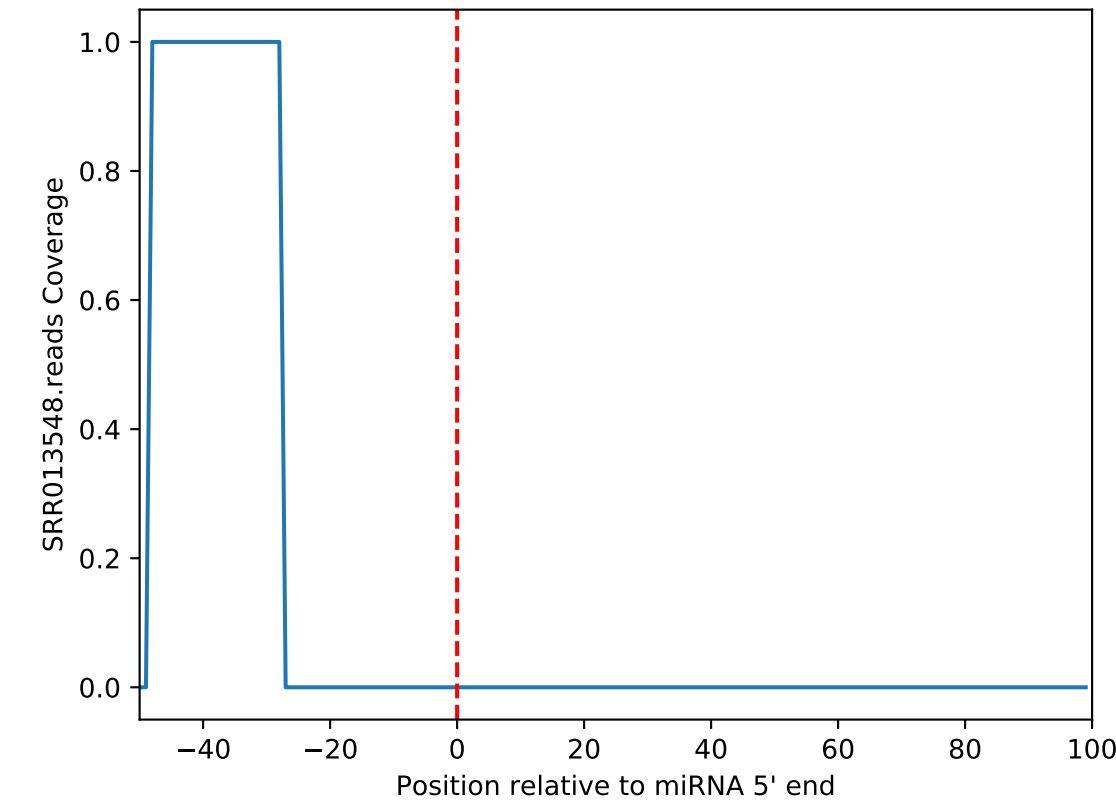

mir-954 (chr4:626142(+))



mir-954 (chr4:626142(+))



mir-954 (chr4:626142(+))

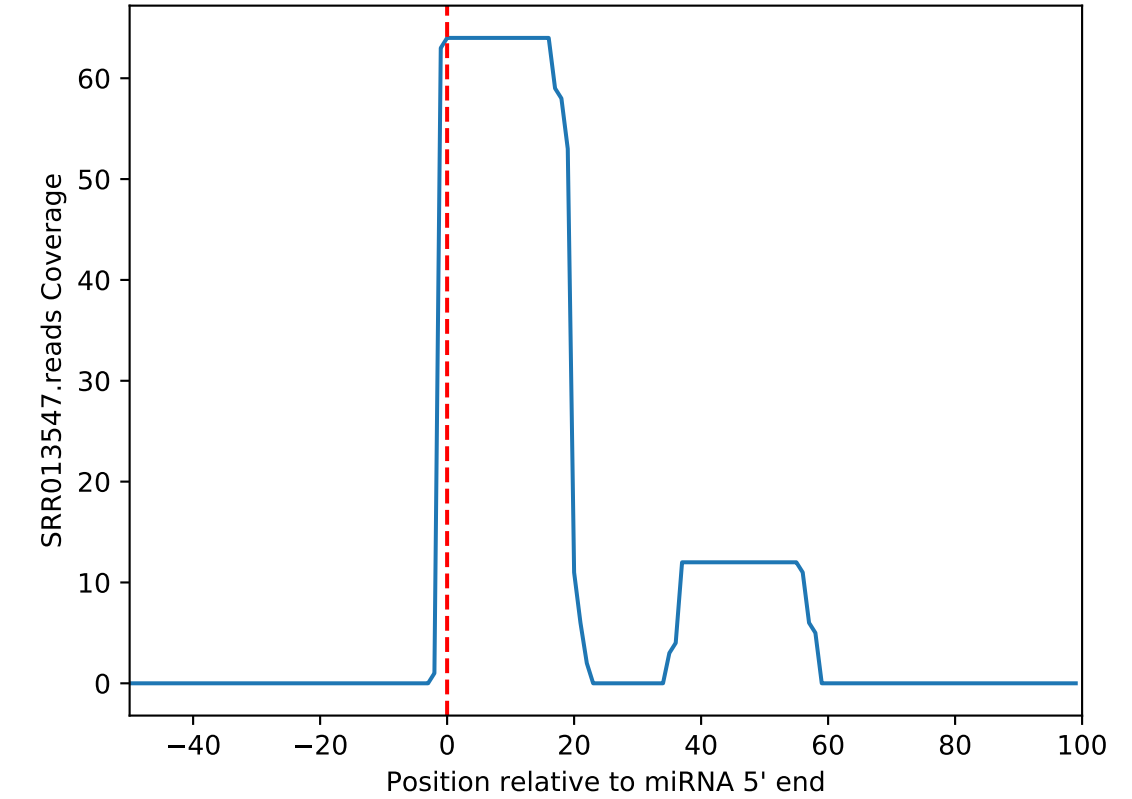

mir-954 (chr4:626142(+))

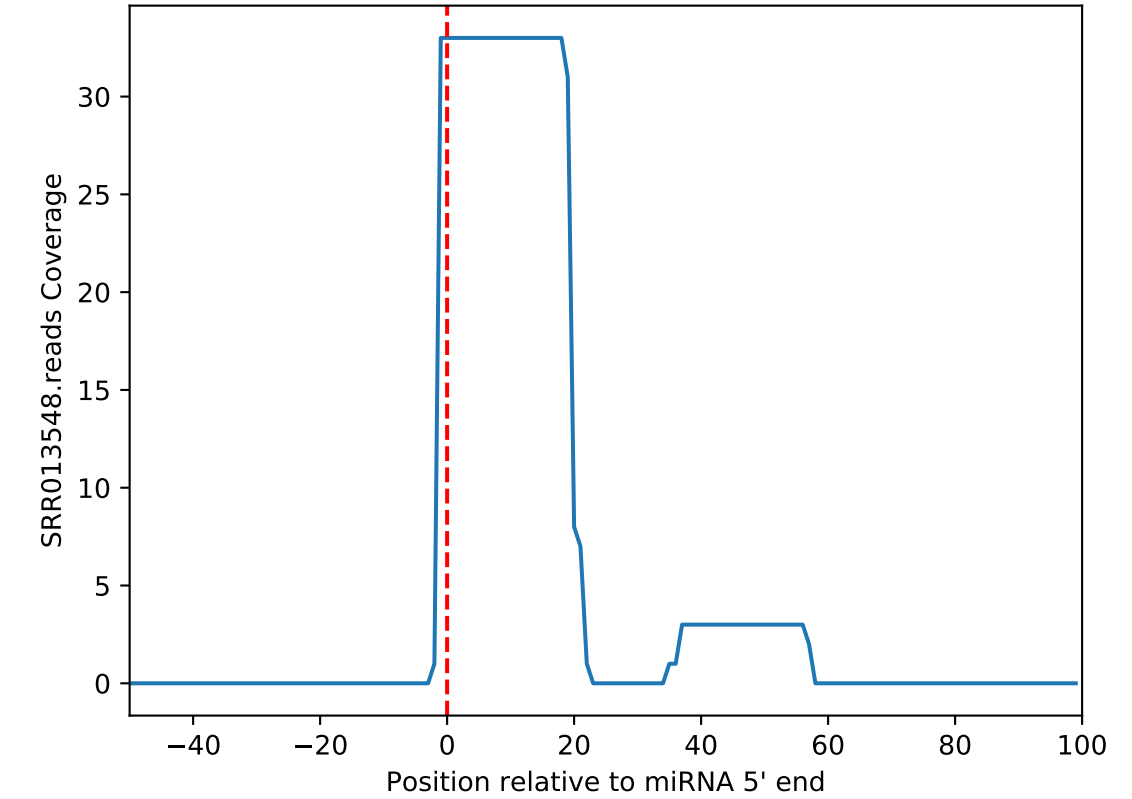

mir-3641 (chrX:2171086(+))



mir-3641 (chrX:2171086(+))



mir-3641 (chrX:2171086(+))

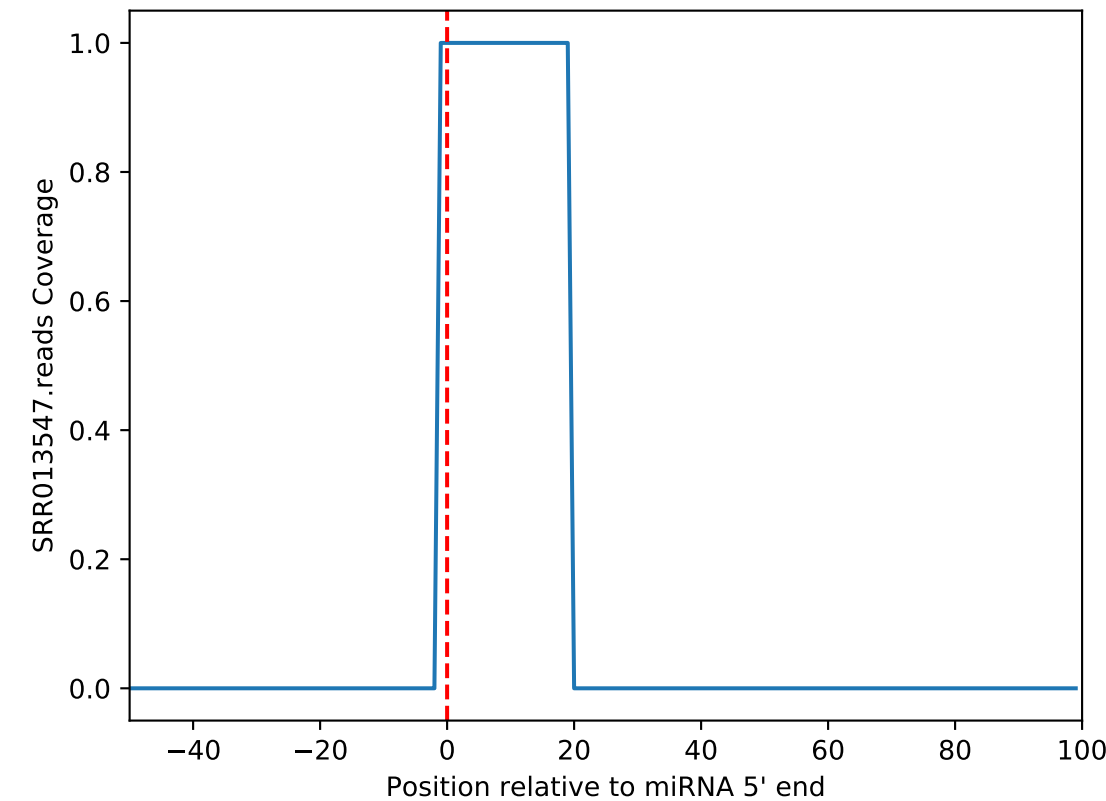

mir-3641 (chrX:2171086(+))



mir-3645 (chrX:5622416(-))



mir-3645 (chrX:5622416(-))



mir-3645 (chrX:5622416(-))



mir-3645 (chrX:5622416(-))

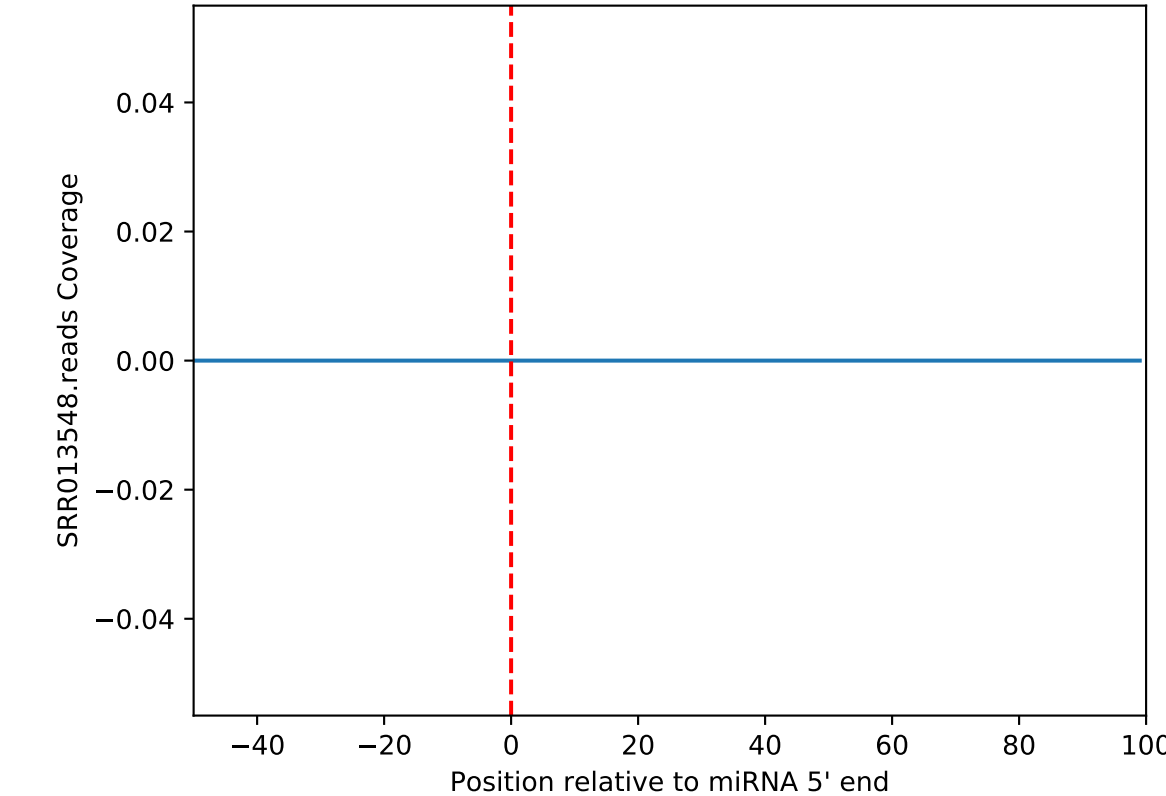

mir-971 (chrX:13062091(+))



mir-971 (chrX:13062091(+))



mir-971 (chrX:13062091(+))

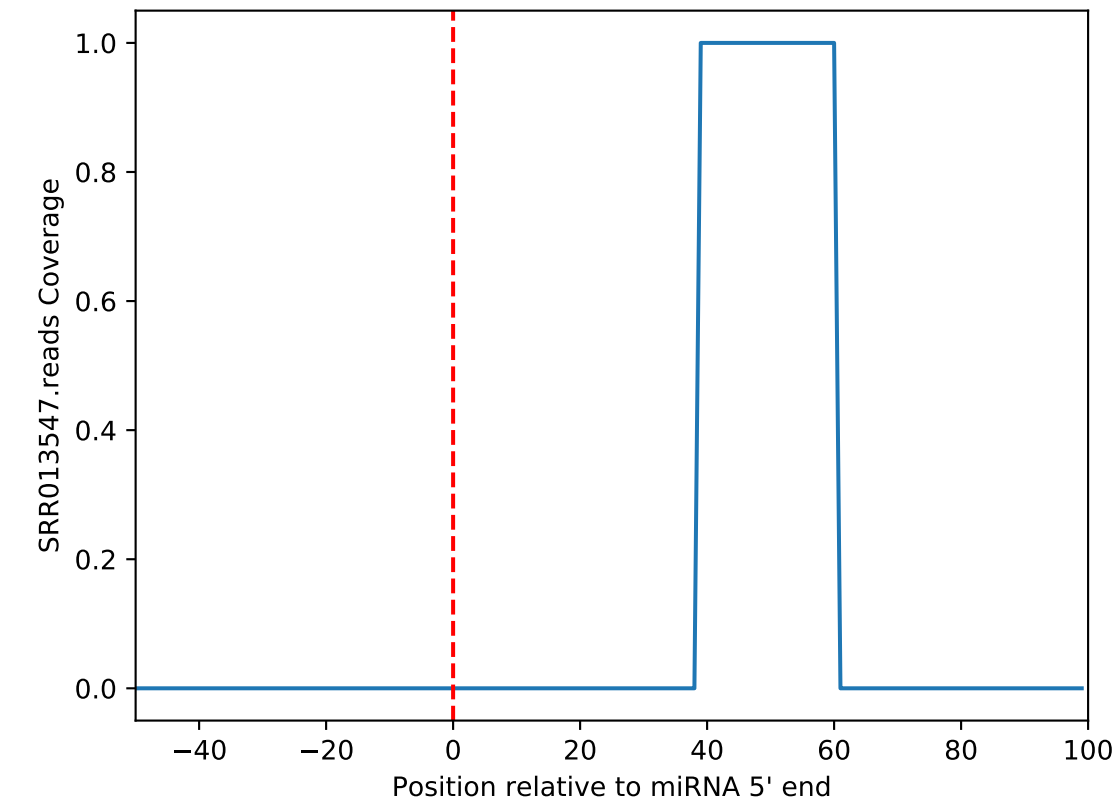

mir-971 (chrX:13062091(+))

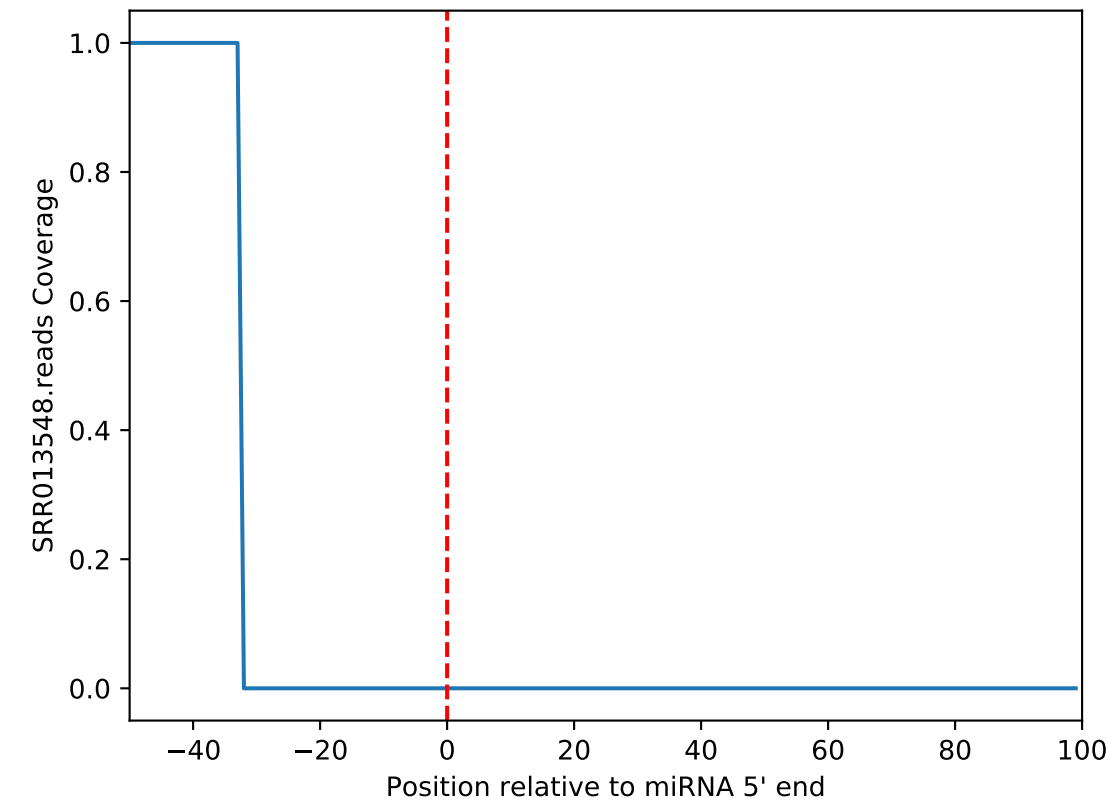

mir-4957 (chrX:15320026(-))



mir-4957 (chrX:15320026(-))

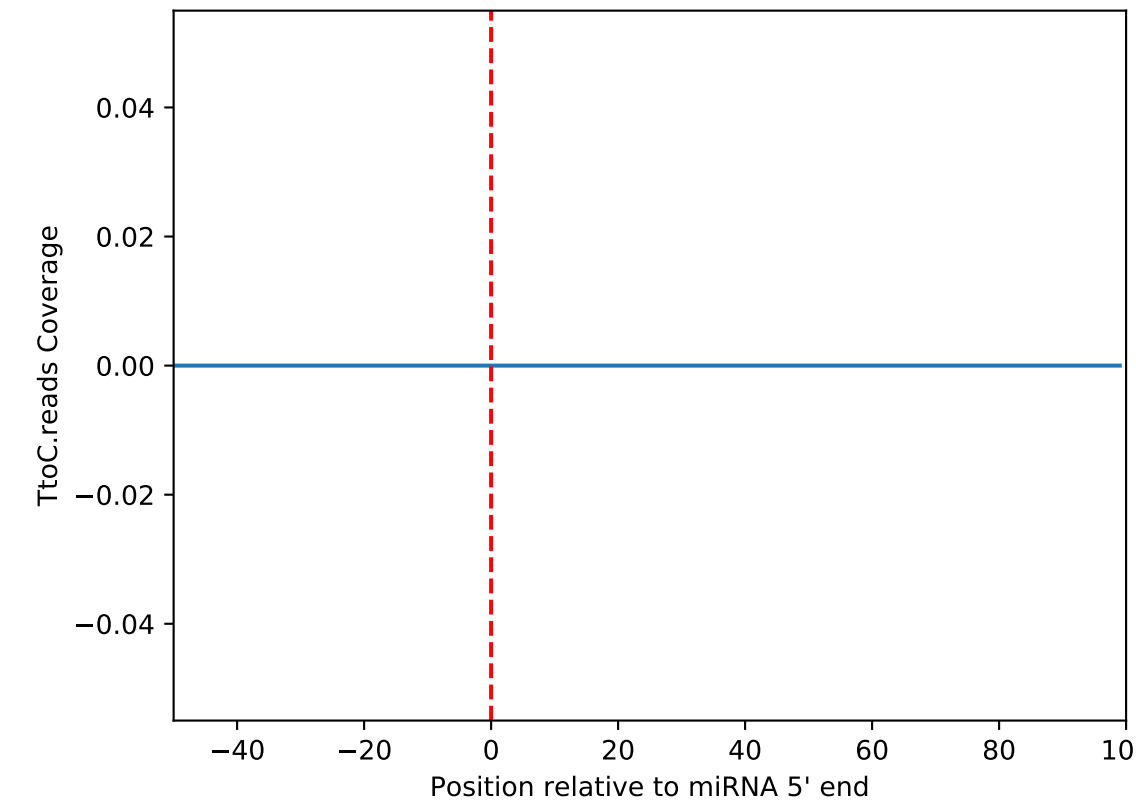

mir-4957 (chrX:15320026(-))

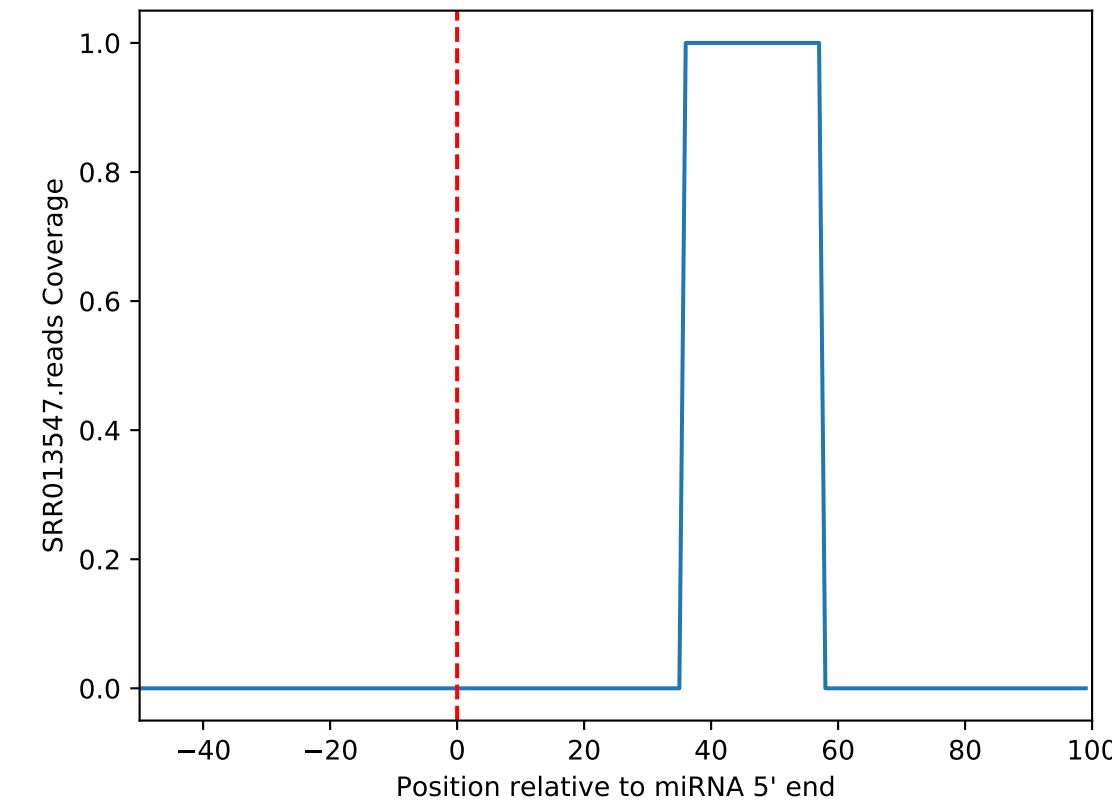

mir-4957 (chrX:15320026(-))





mir-927 (chrX:15966023(-))



mir-927 (chrX:15966023(-))



mir-927 (chrX:15966023(-))



mir-927 (chrX:15966023(-))

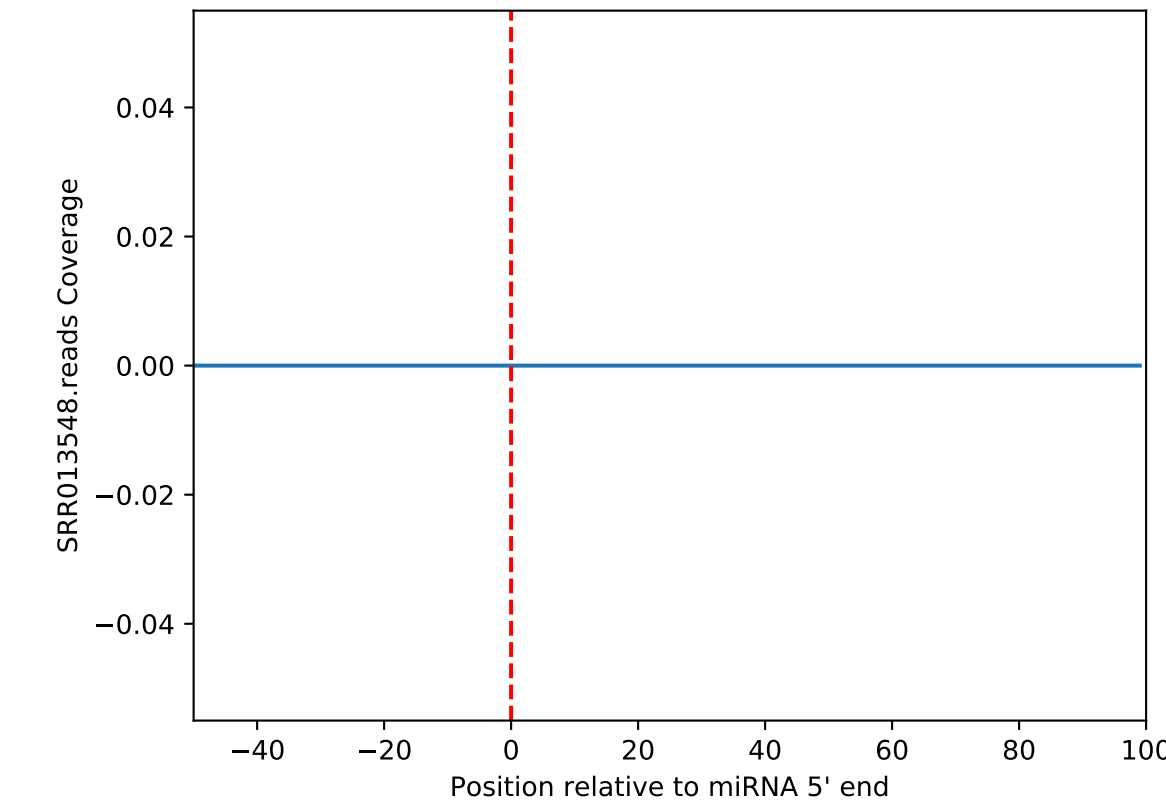

mir-4958 (chrX:16081025(-))



mir-4958 (chrX:16081025(-))



mir-4958 (chrX:16081025(-))

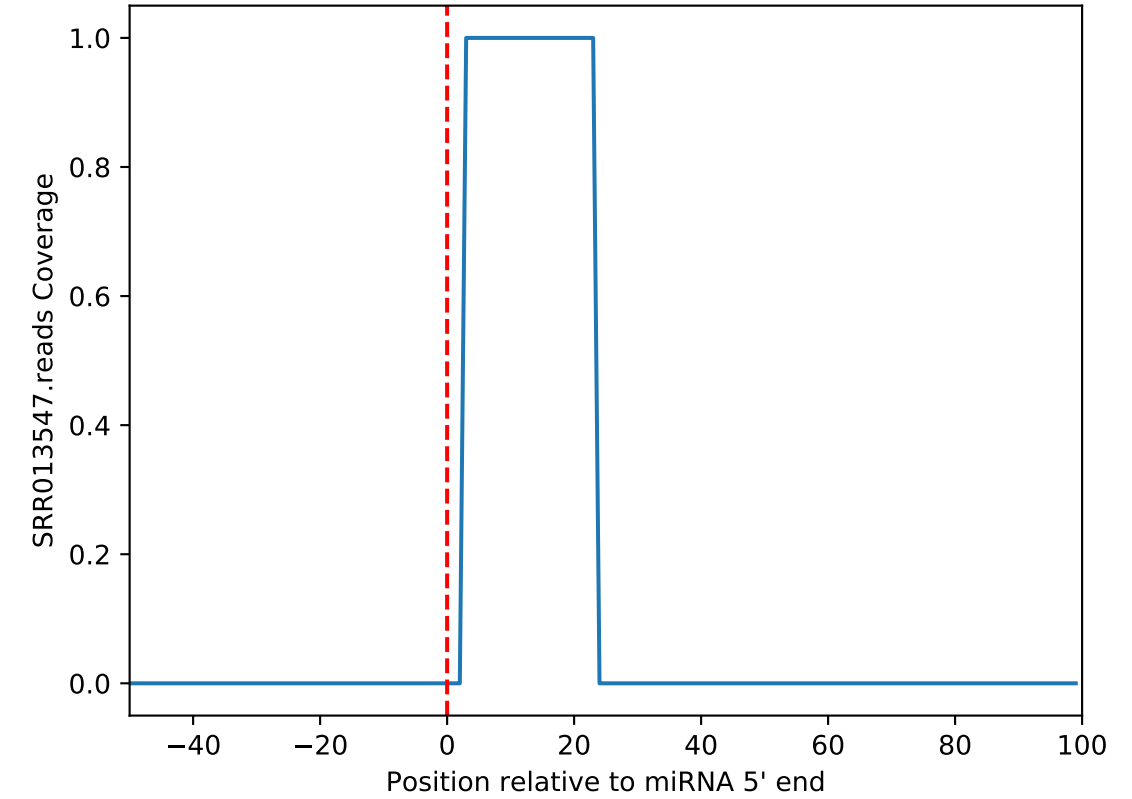

mir-4958 (chrX:16081025(-))



mir-969 (chrX:18124375(+))



mir-969 (chrX:18124375(+))



mir-969 (chrX:18124375(+))



mir-969 (chrX:18124375(+))

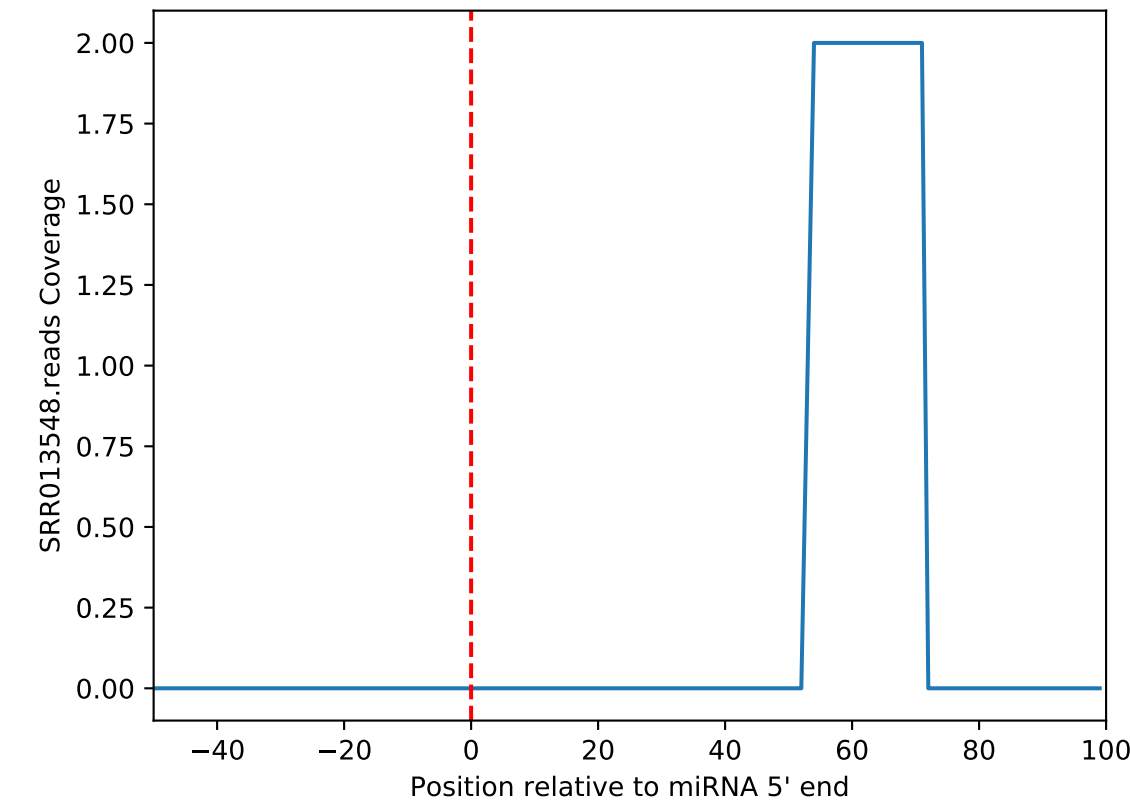

Supplement: mmc2.pdf [file mmc2.pdf]
