# Supplementary material for: Exportin-5 binding precedes 5′- and 3′-end processing of tRNA precursors in Drosophila
Source: PubMed Central journal article supplement (PMC11402290; doi:10.1016/j.jbc.2024.107632), 2024-08-02

# tRNA-Asn-GTT-1-4

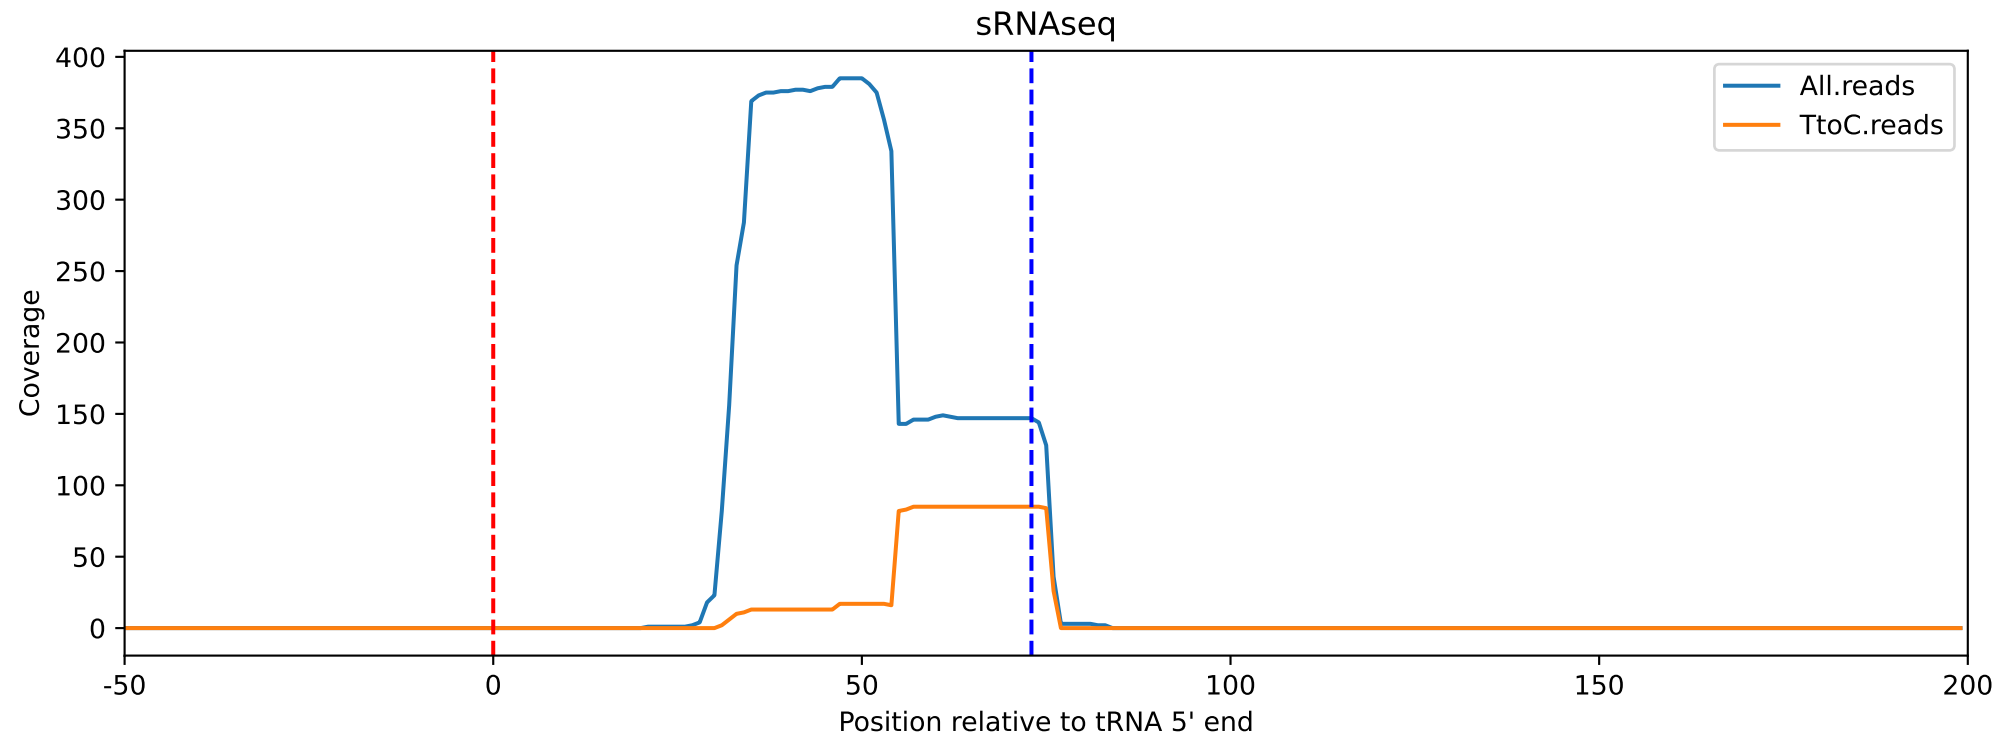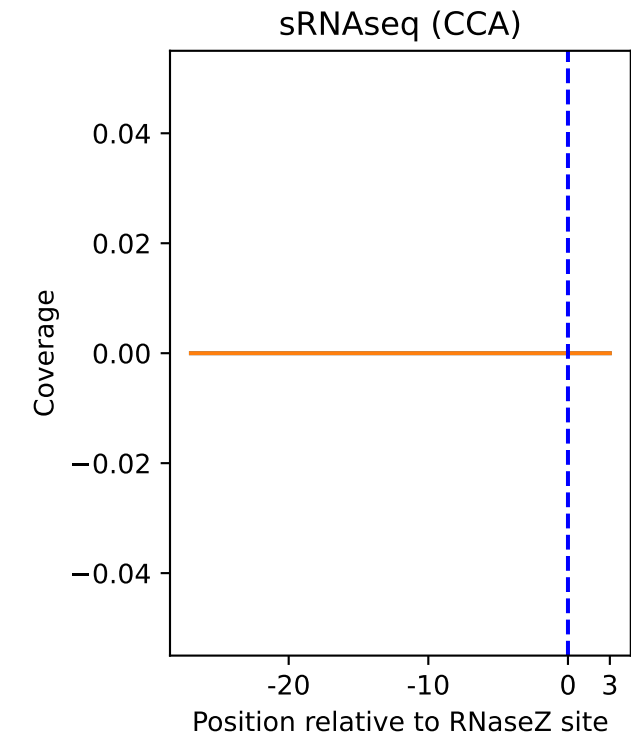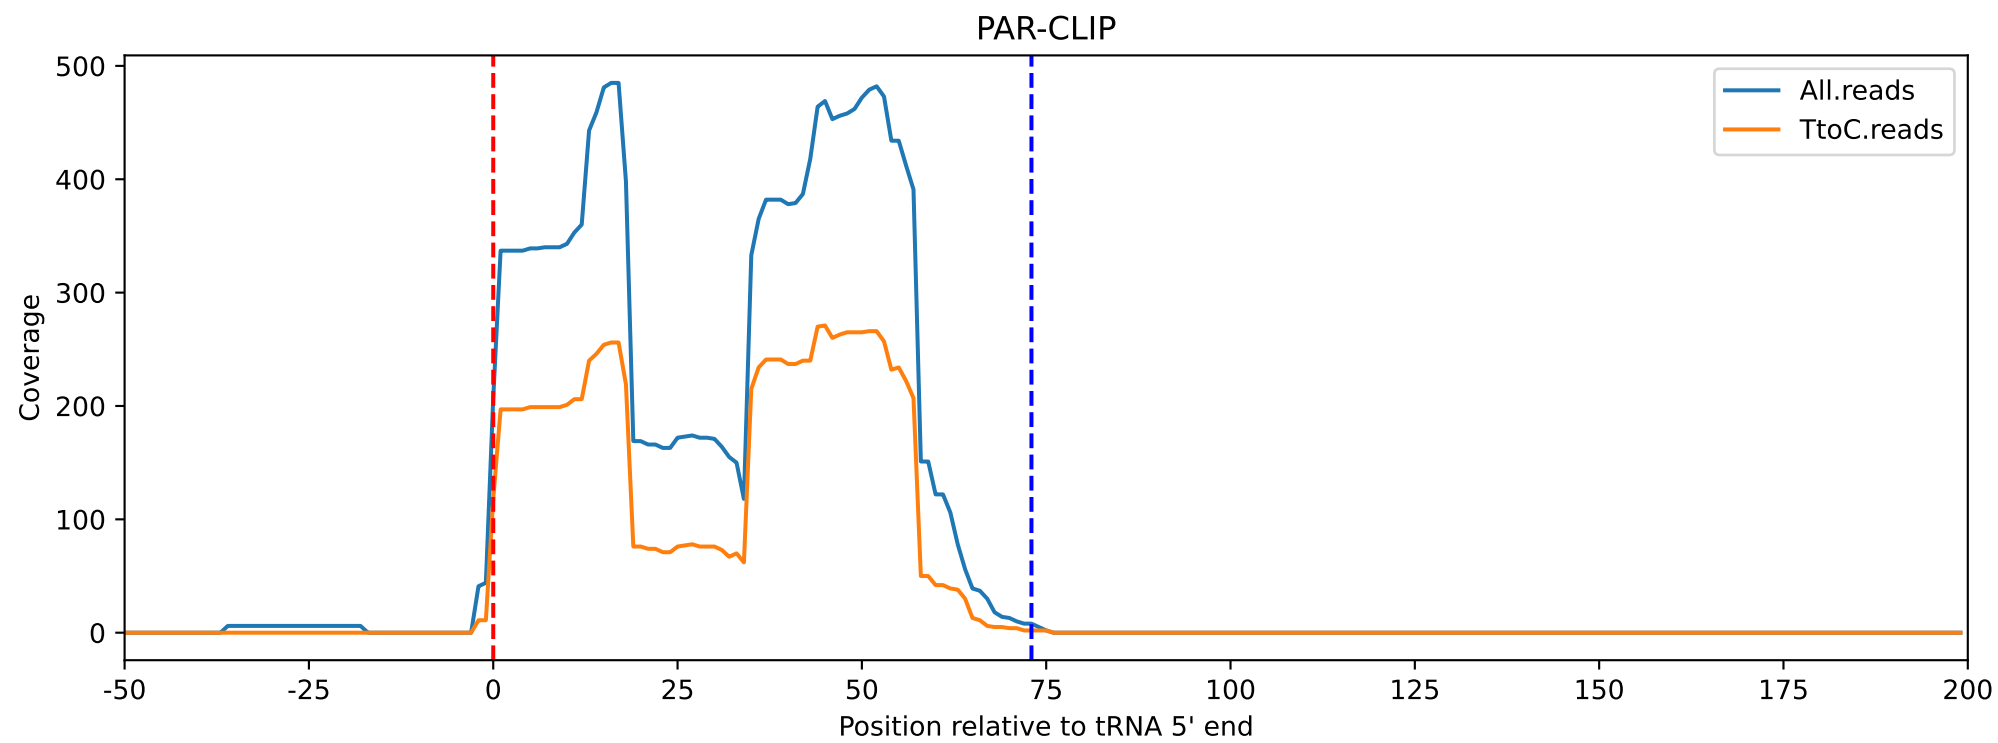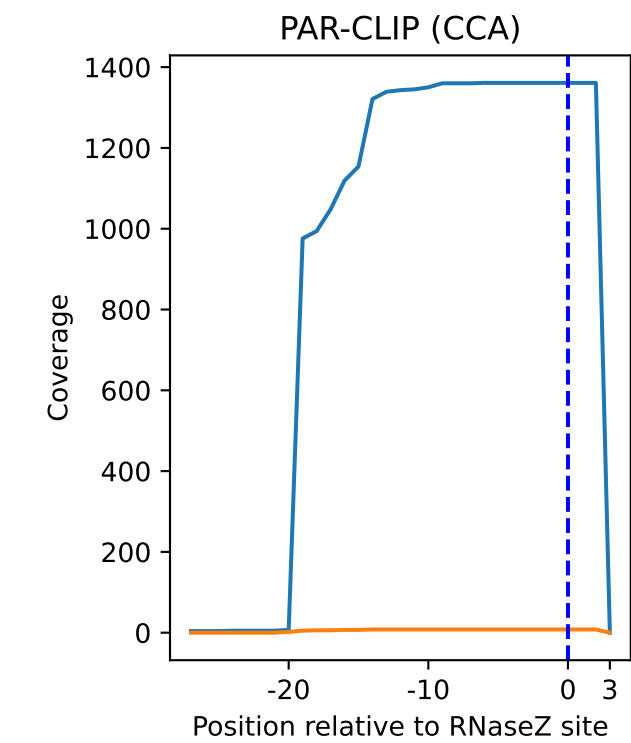

# tRNA-Leu-CAA-1-1

## sRNAseq

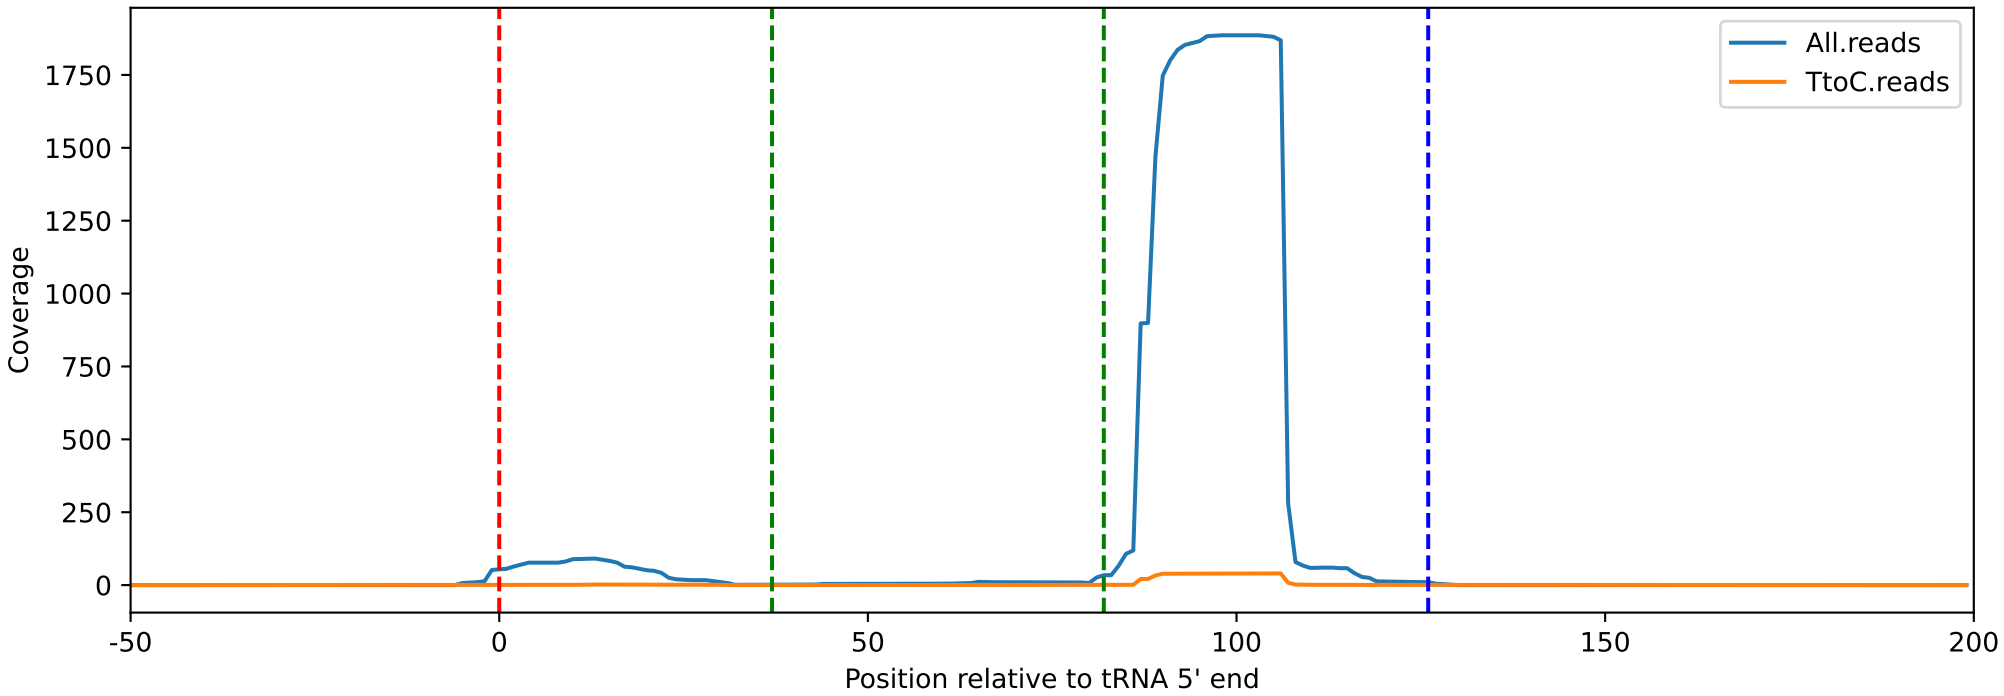

## sRNAseq (CCA)

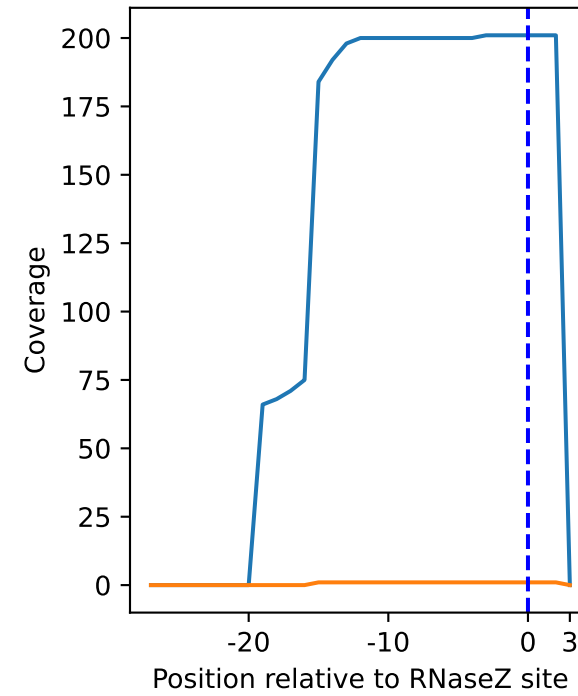

## PAR-CLIP

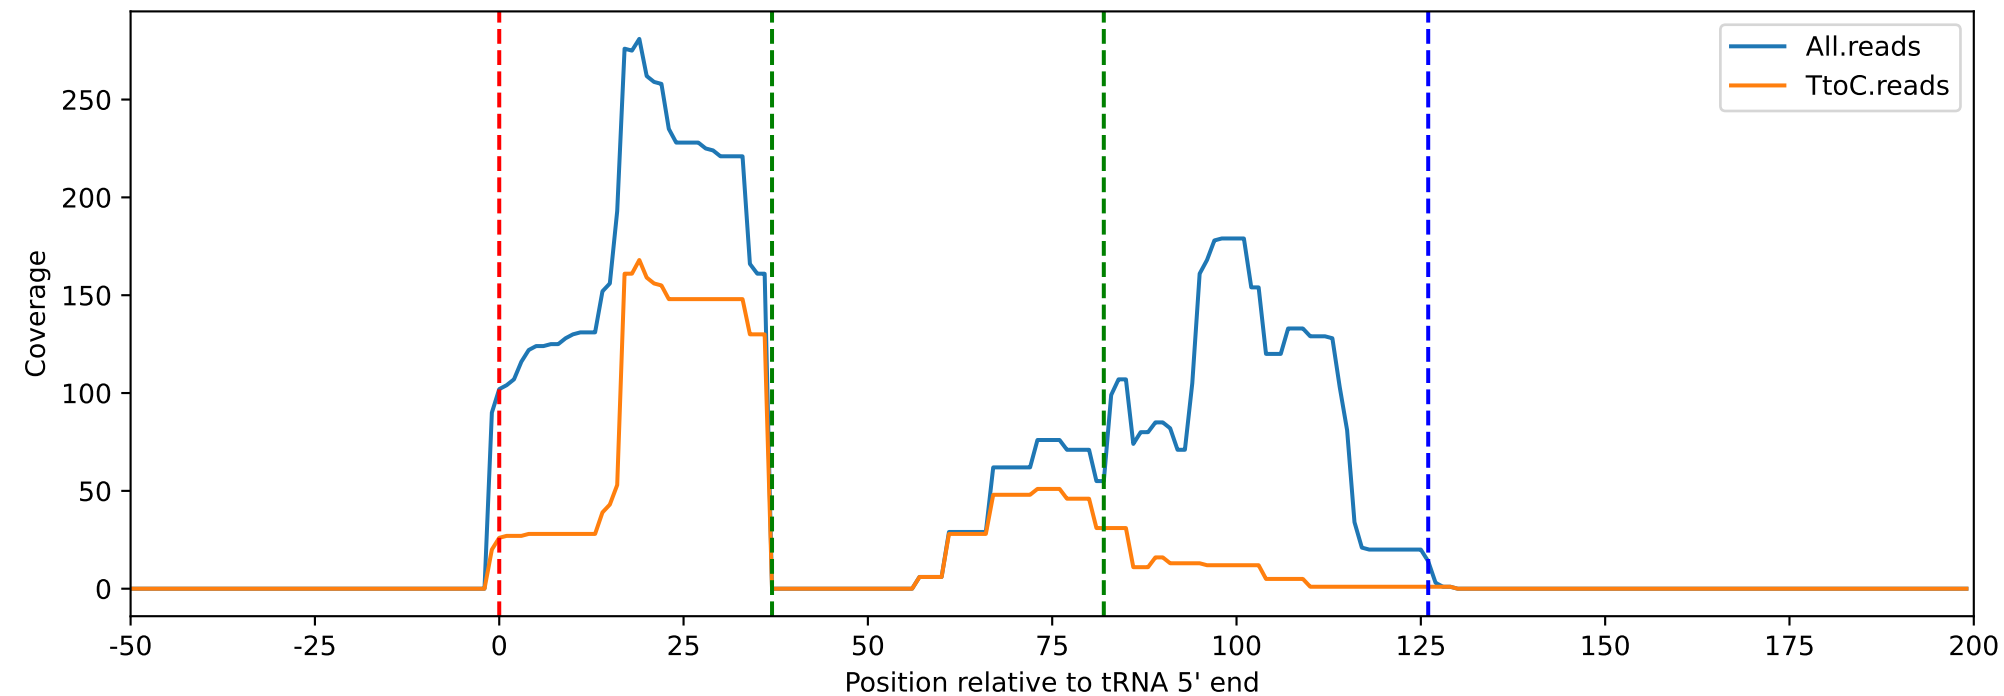

## PAR-CLIP (CCA)

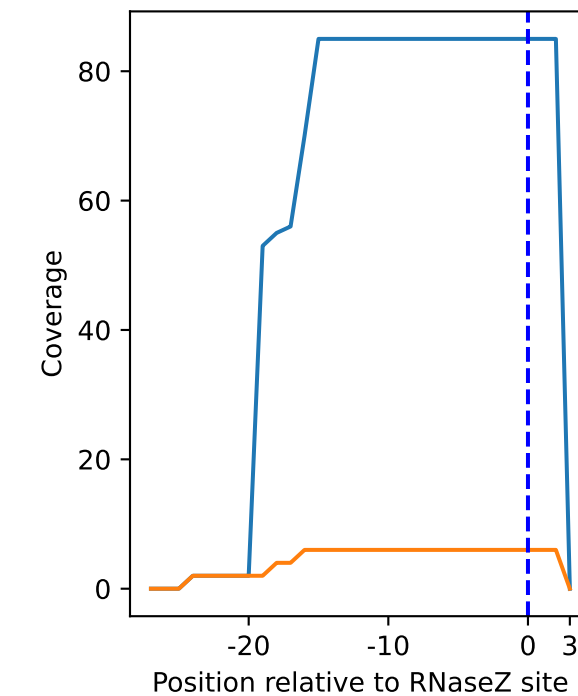

# tRNA-Ser-AGA-3-1

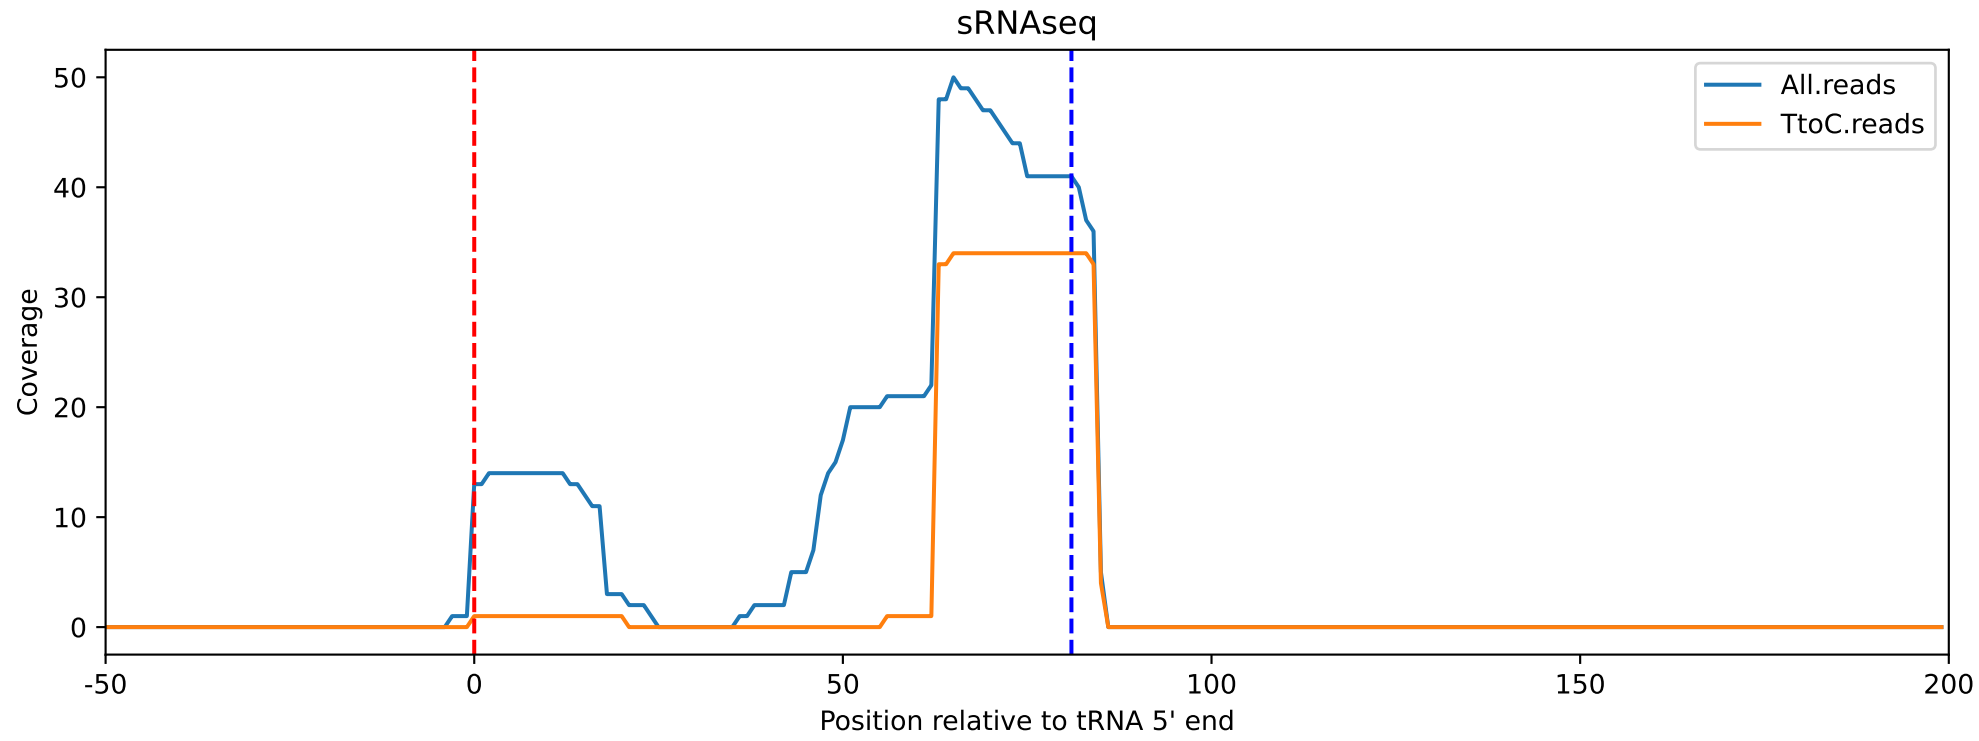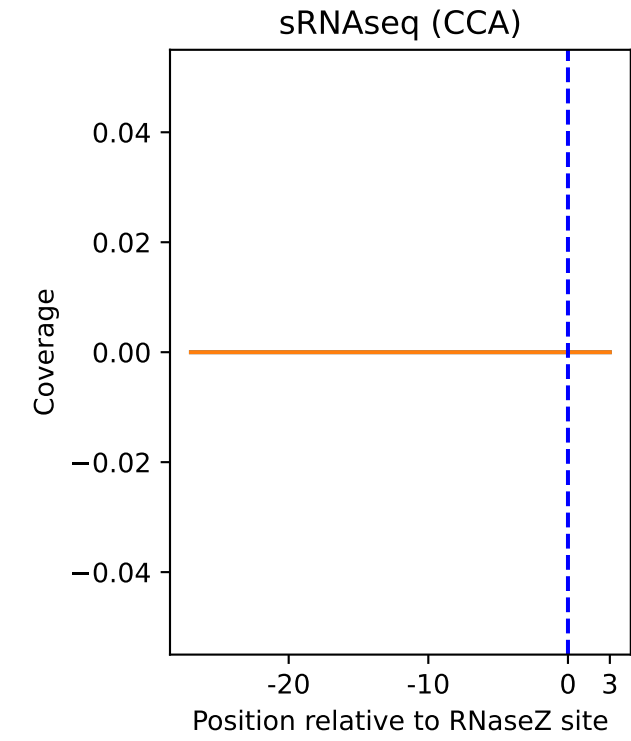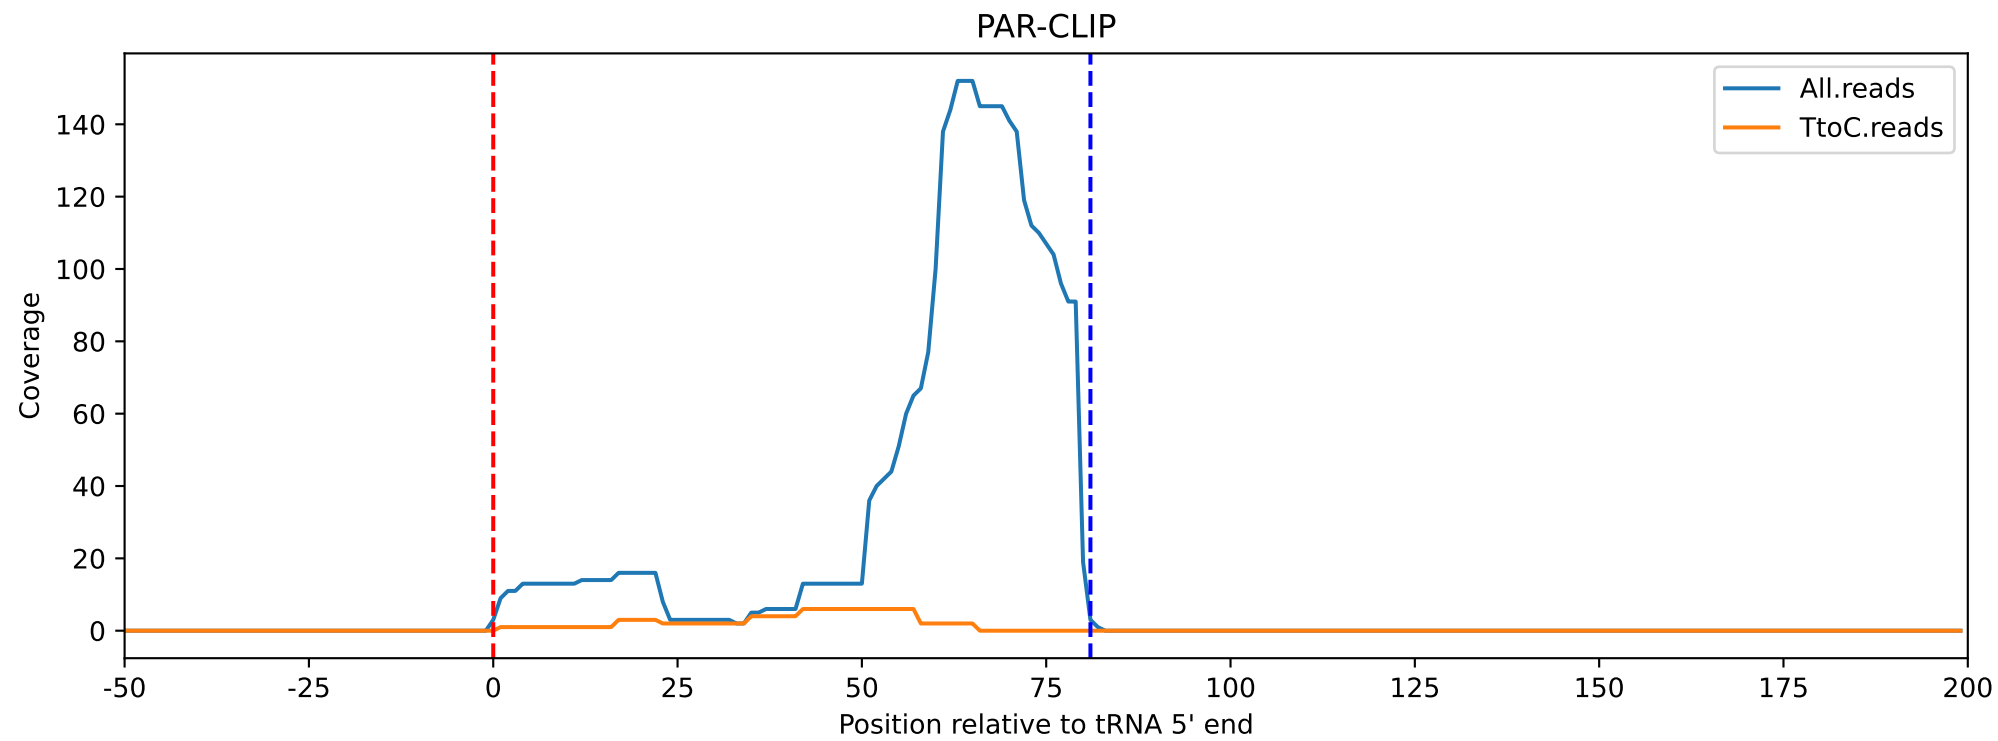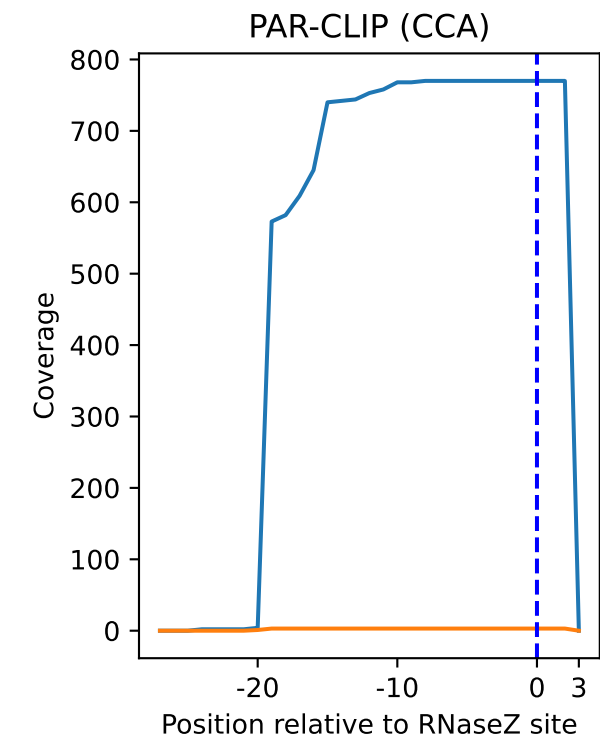

# tRNA-Asn-GTT-1-5

## sRNAseq

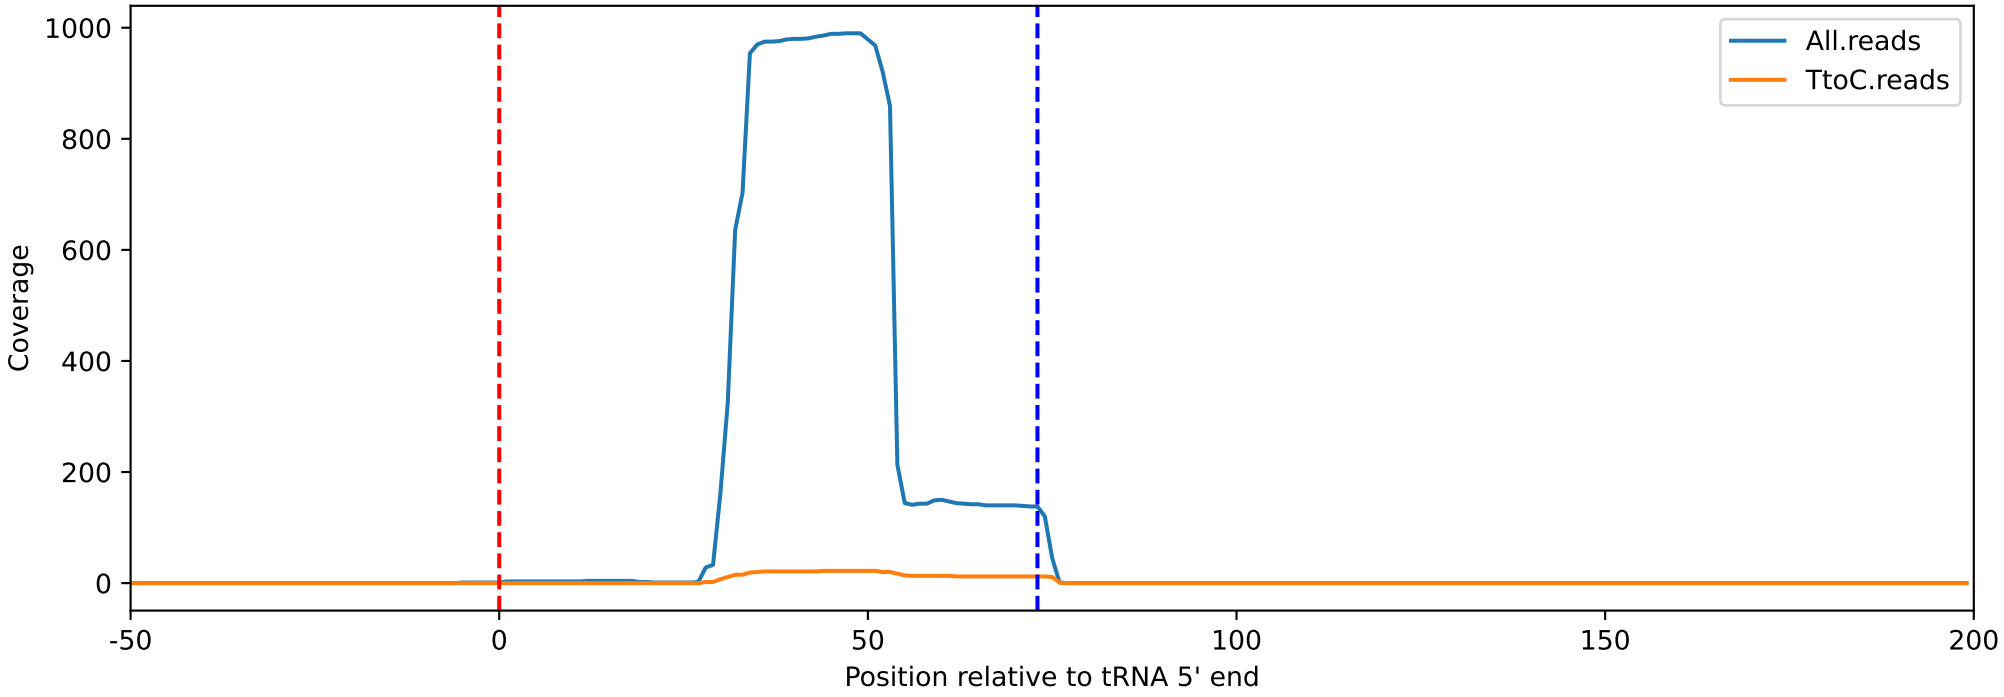

## sRNAseq (CCA)

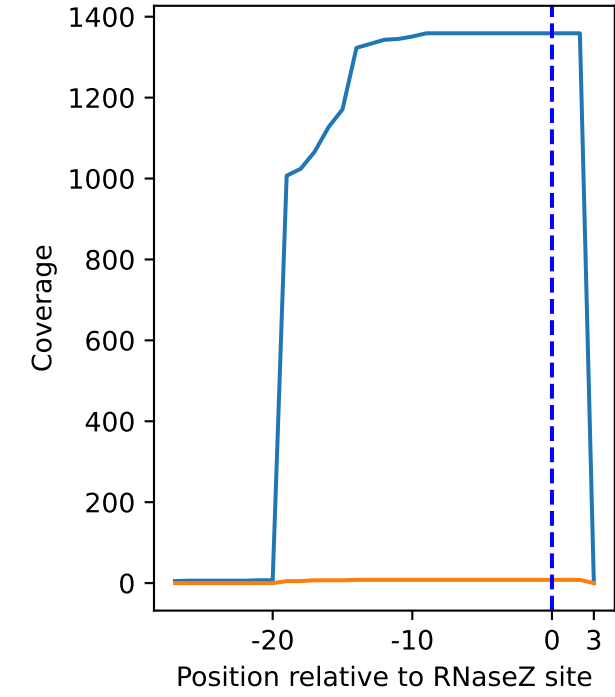

## PAR-CLIP

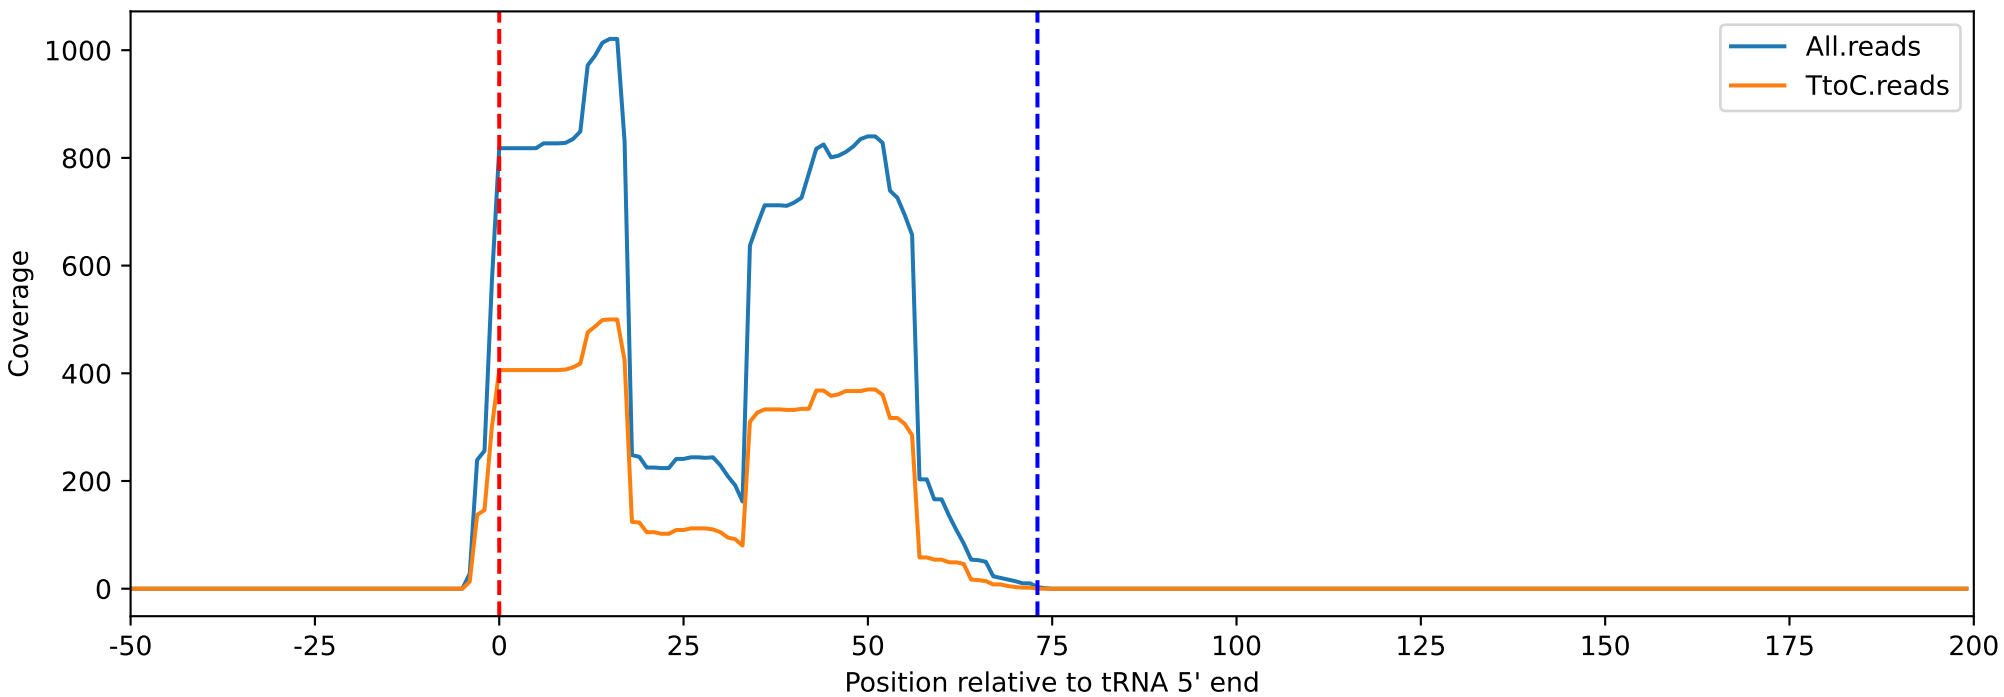

## PAR-CLIP (CCA)

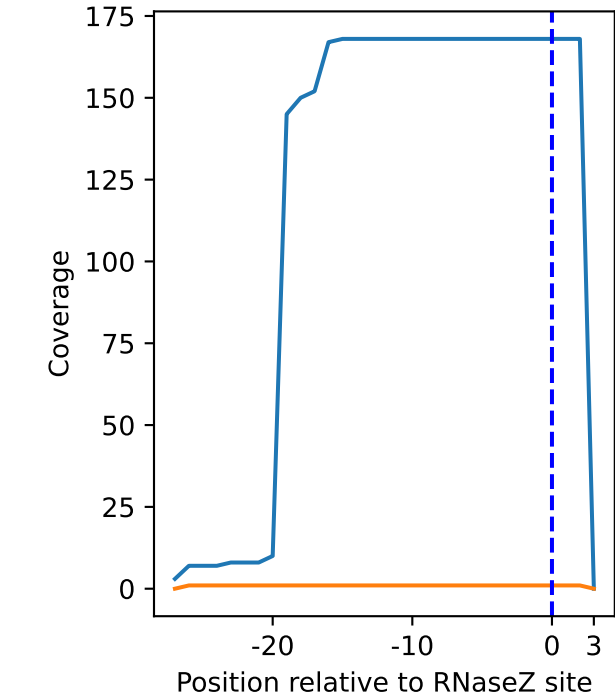

# tRNA-Asn-GTT-1-9

## sRNAseq

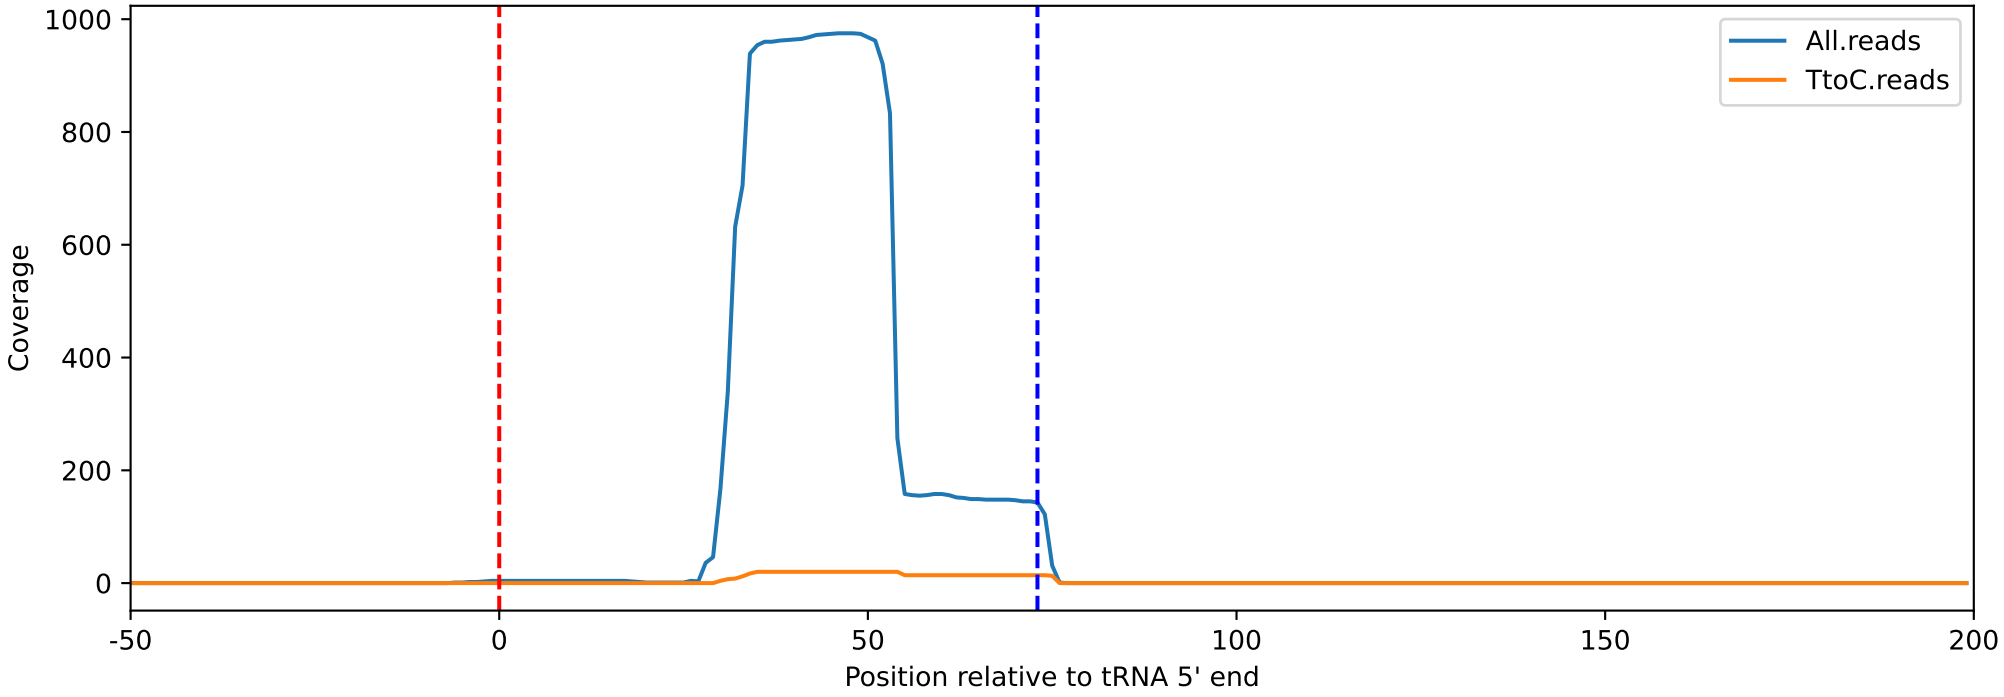

## sRNAseq (CCA)

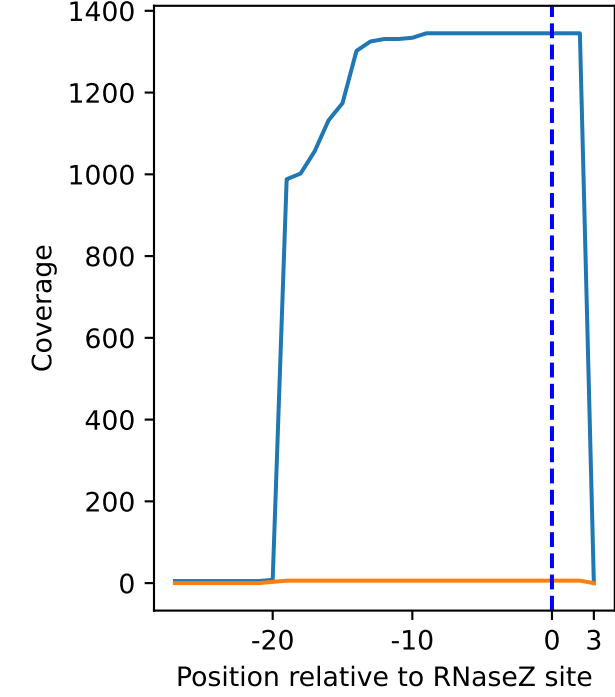

## PAR-CLIP

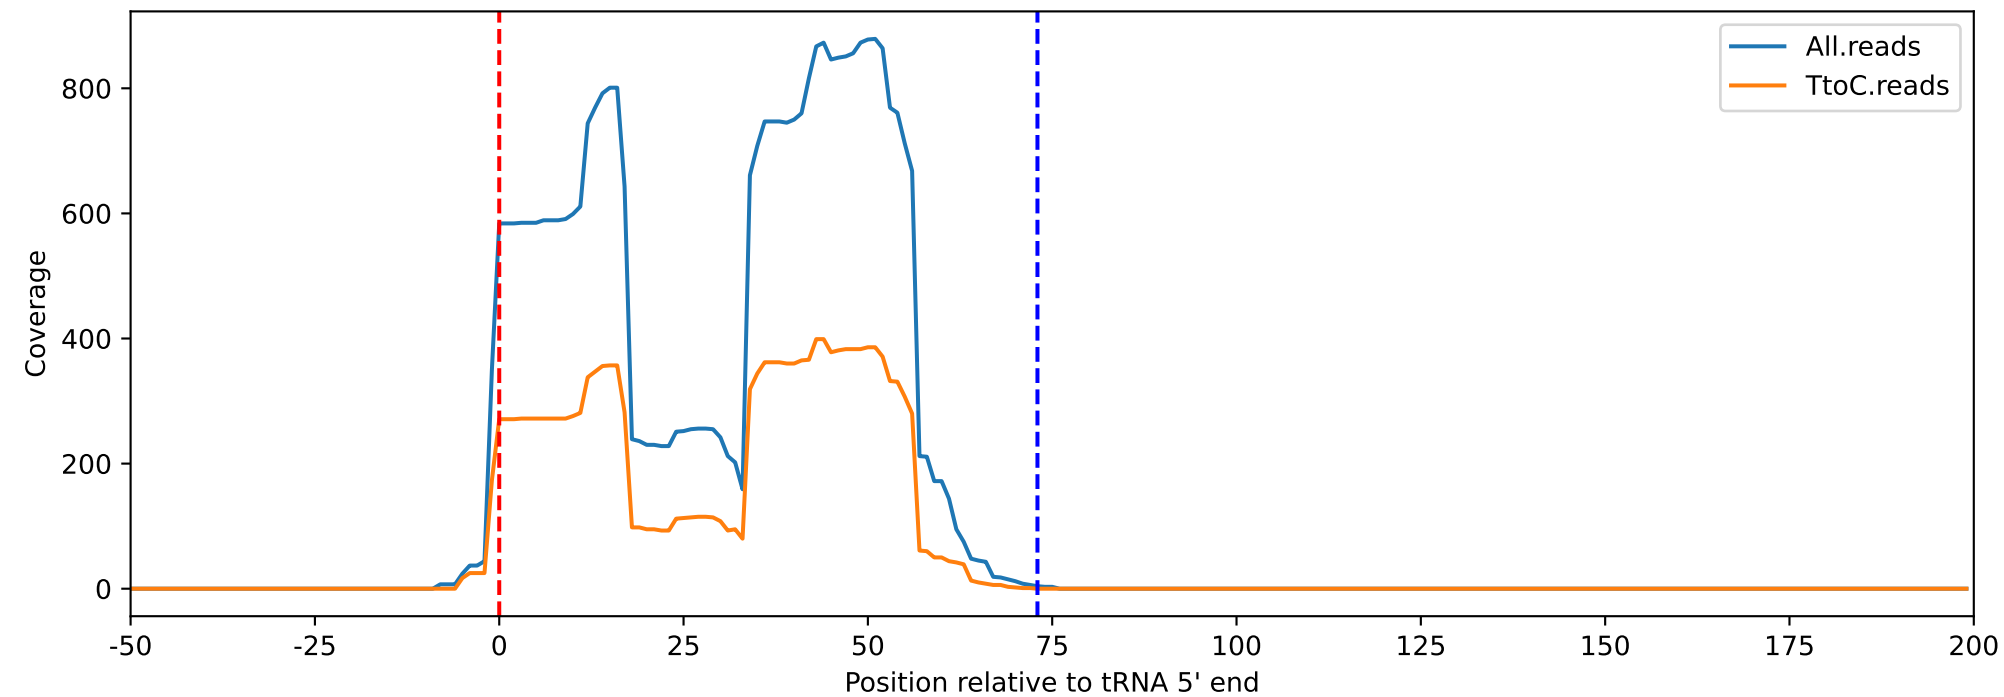

## PAR-CLIP (CCA)

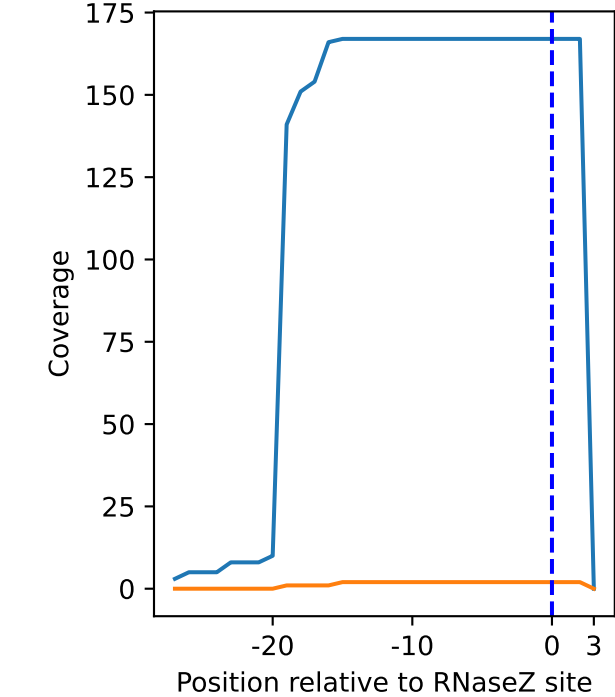

# tRNA-Asn-GTT-1-2

## sRNAseq

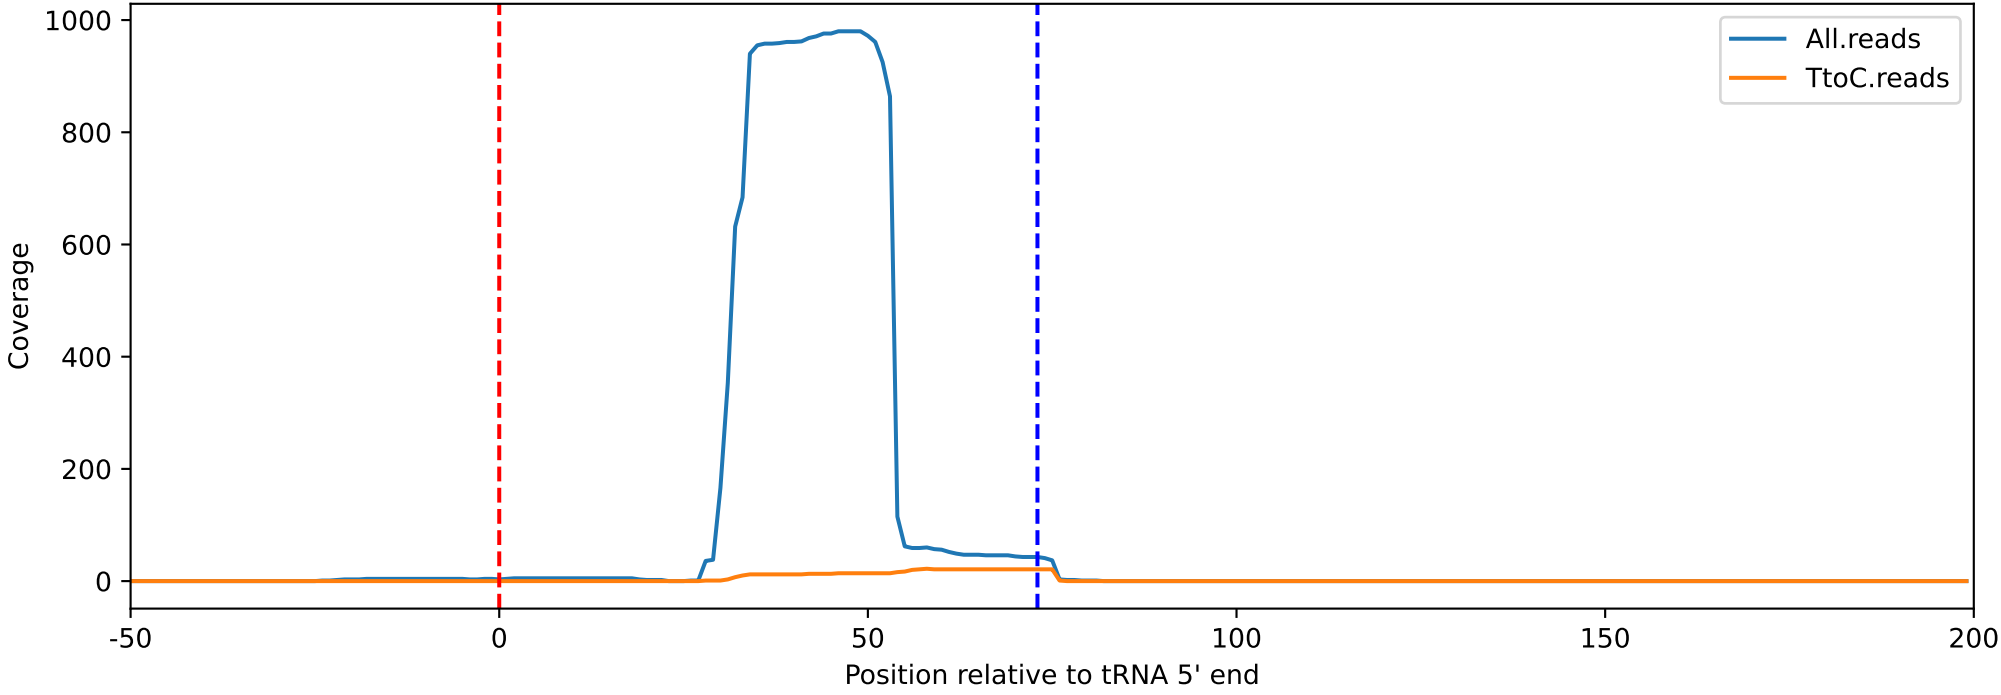

## sRNAseq (CCA)

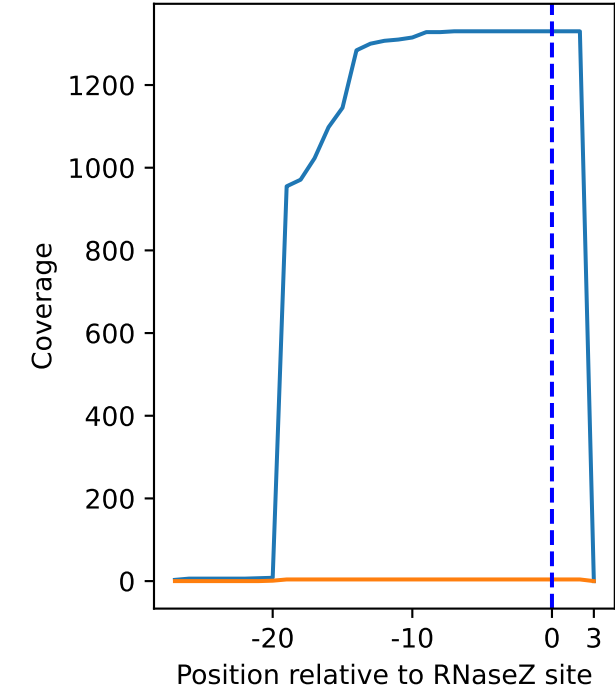

## PAR-CLIP

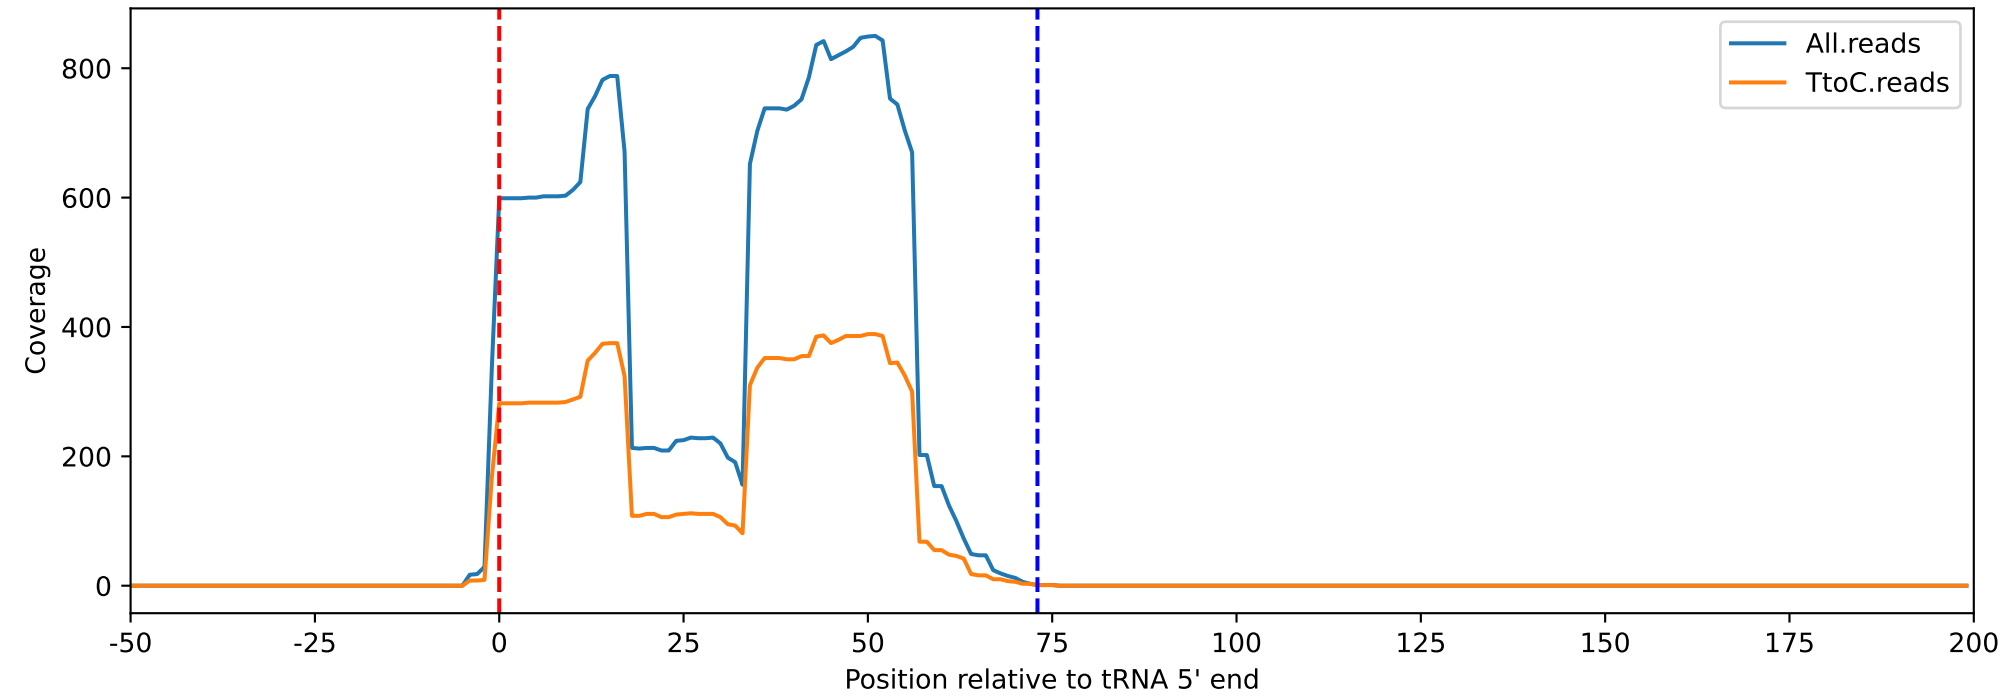

## PAR-CLIP (CCA)

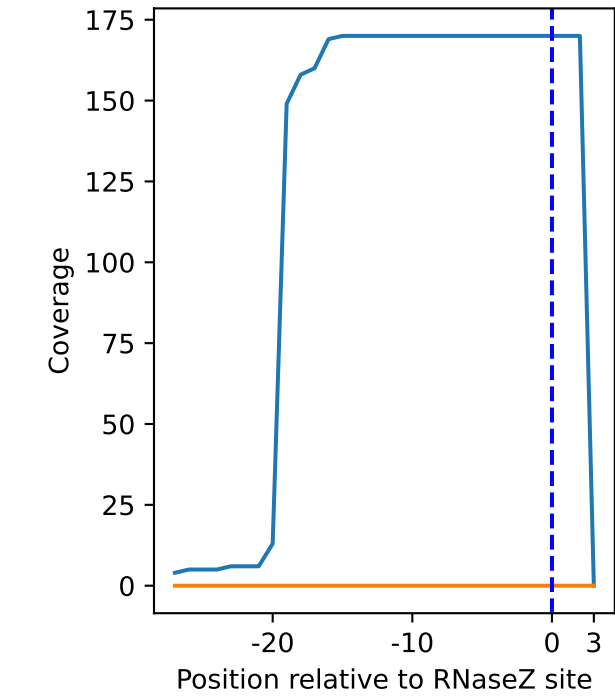

# tRNA-Arg-ACG-1-7

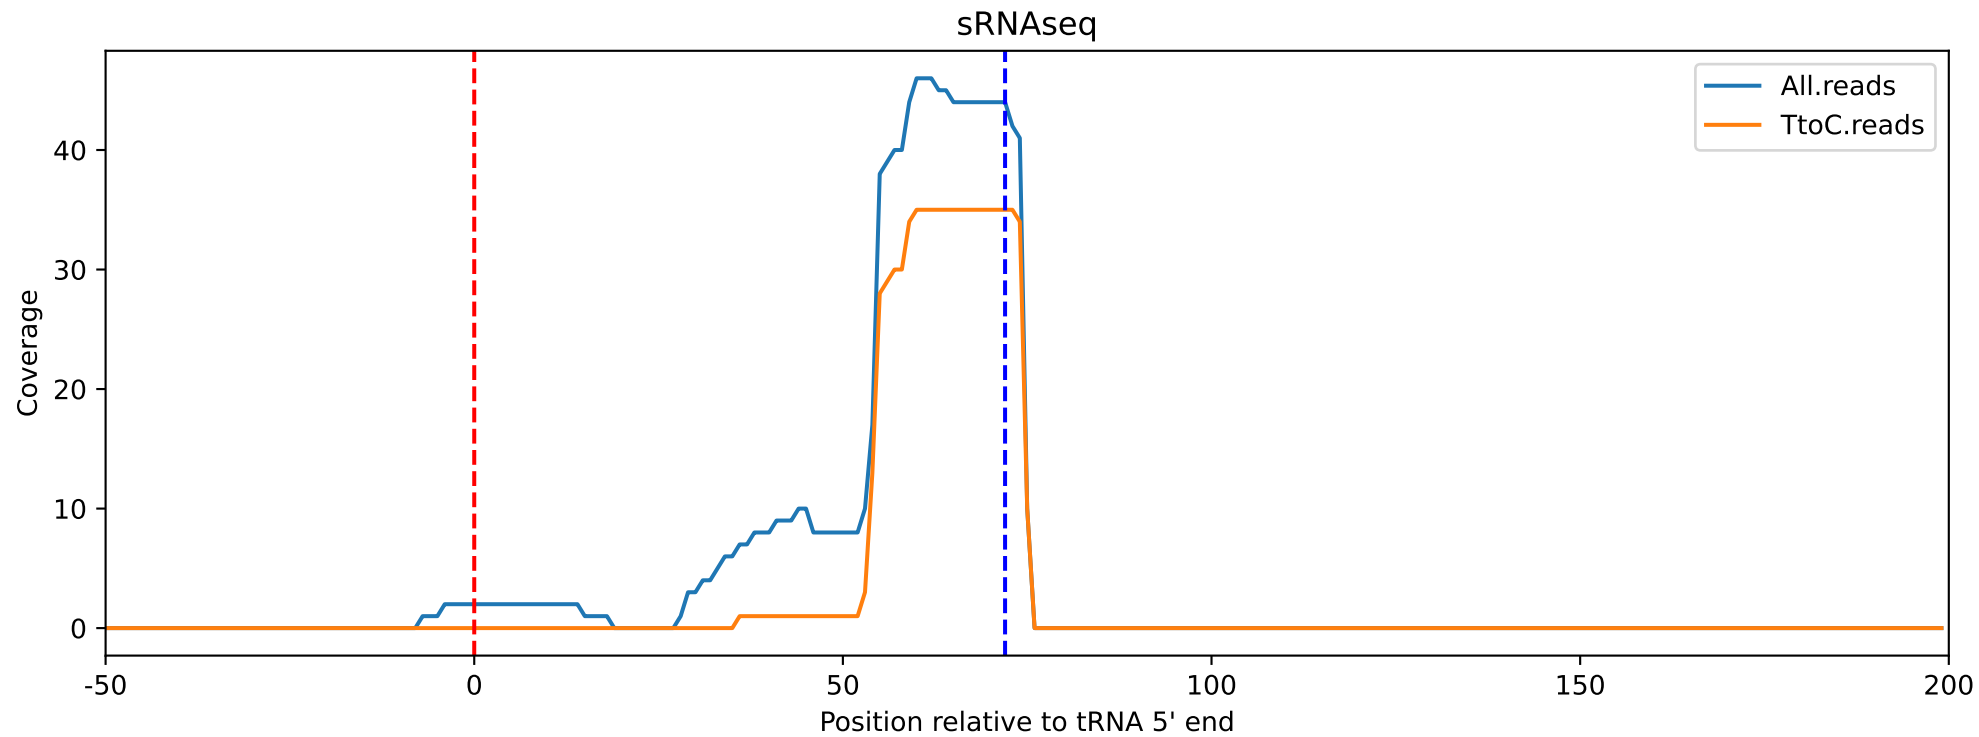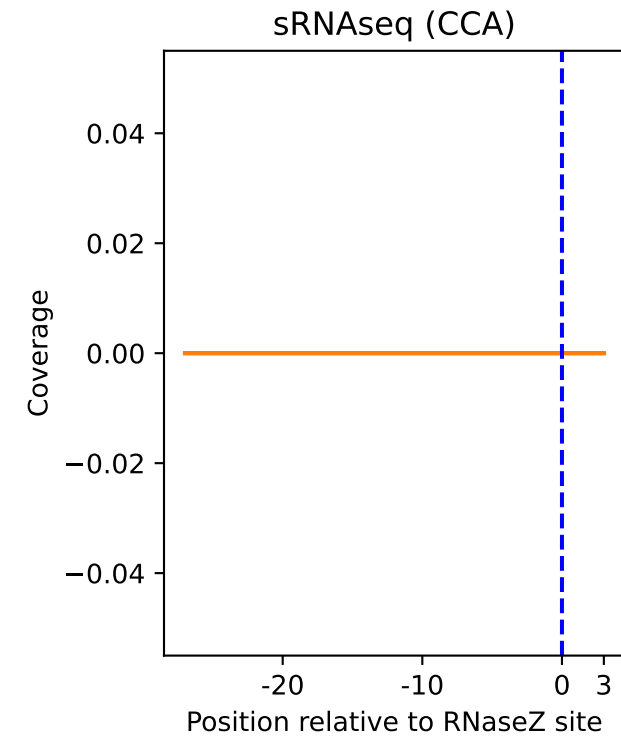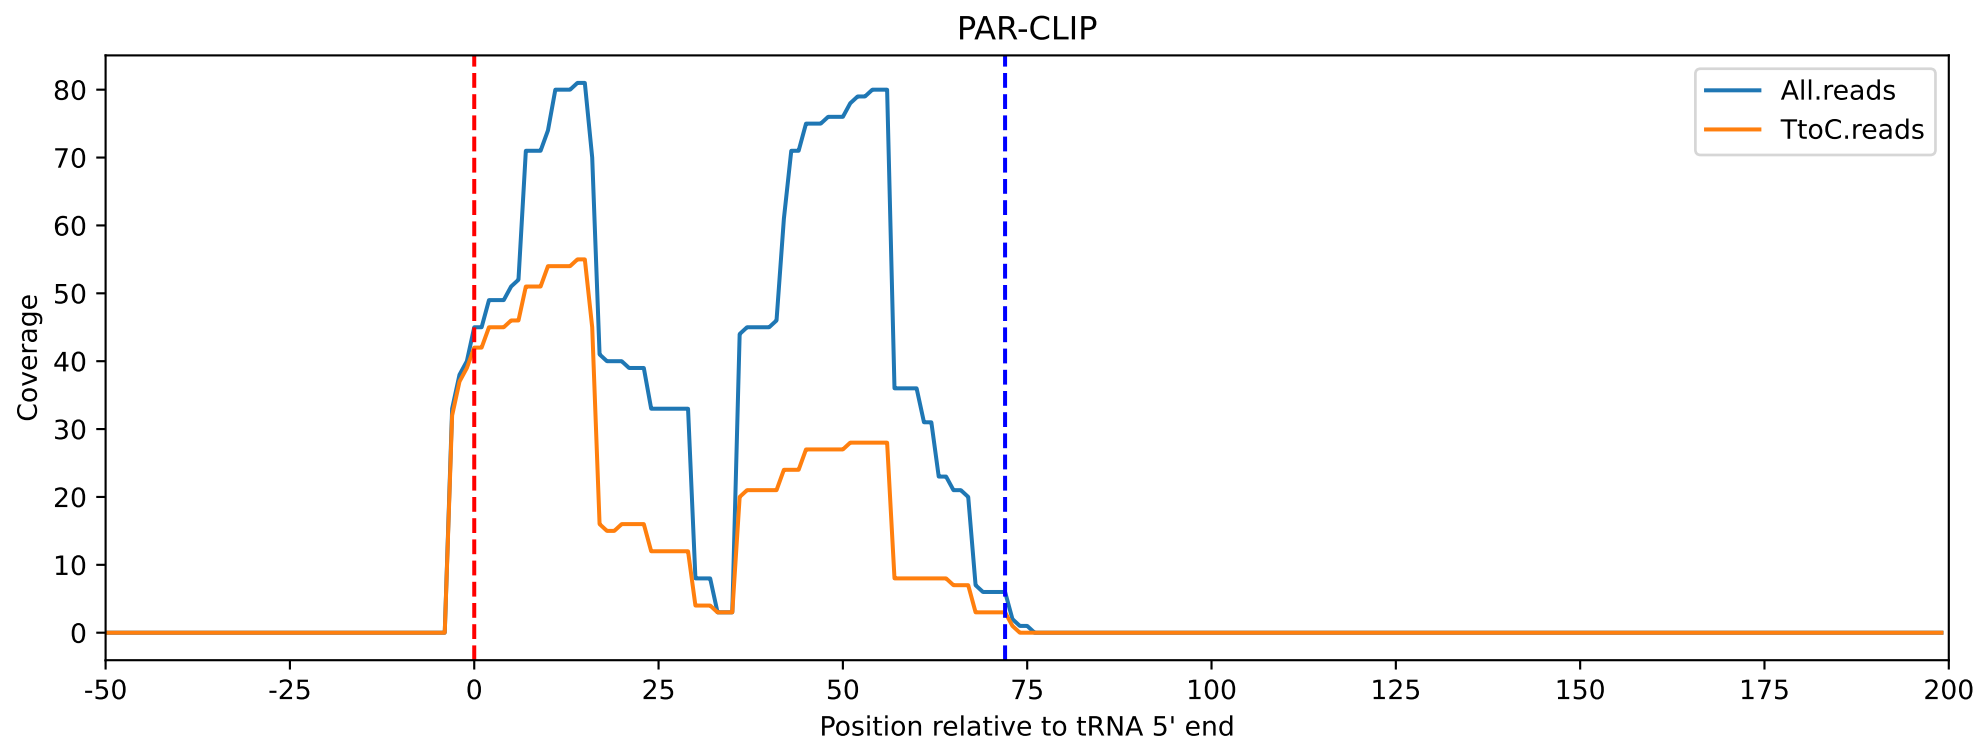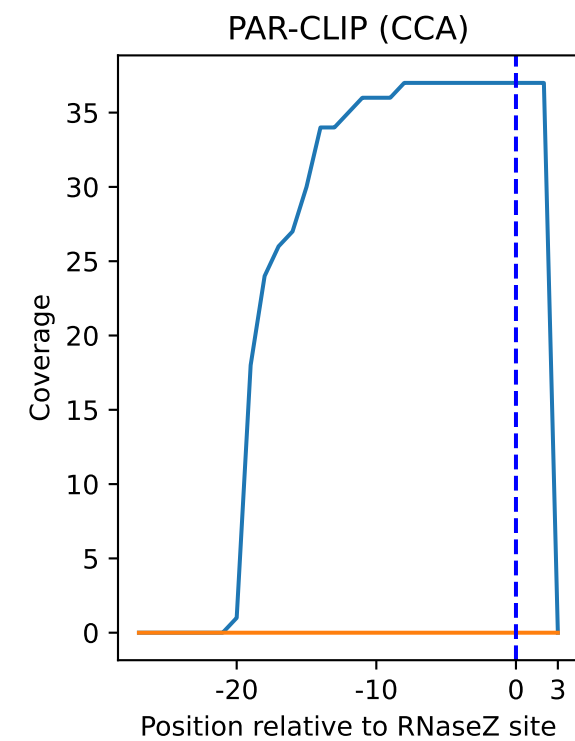

# tRNA-Asn-GTT-1-7

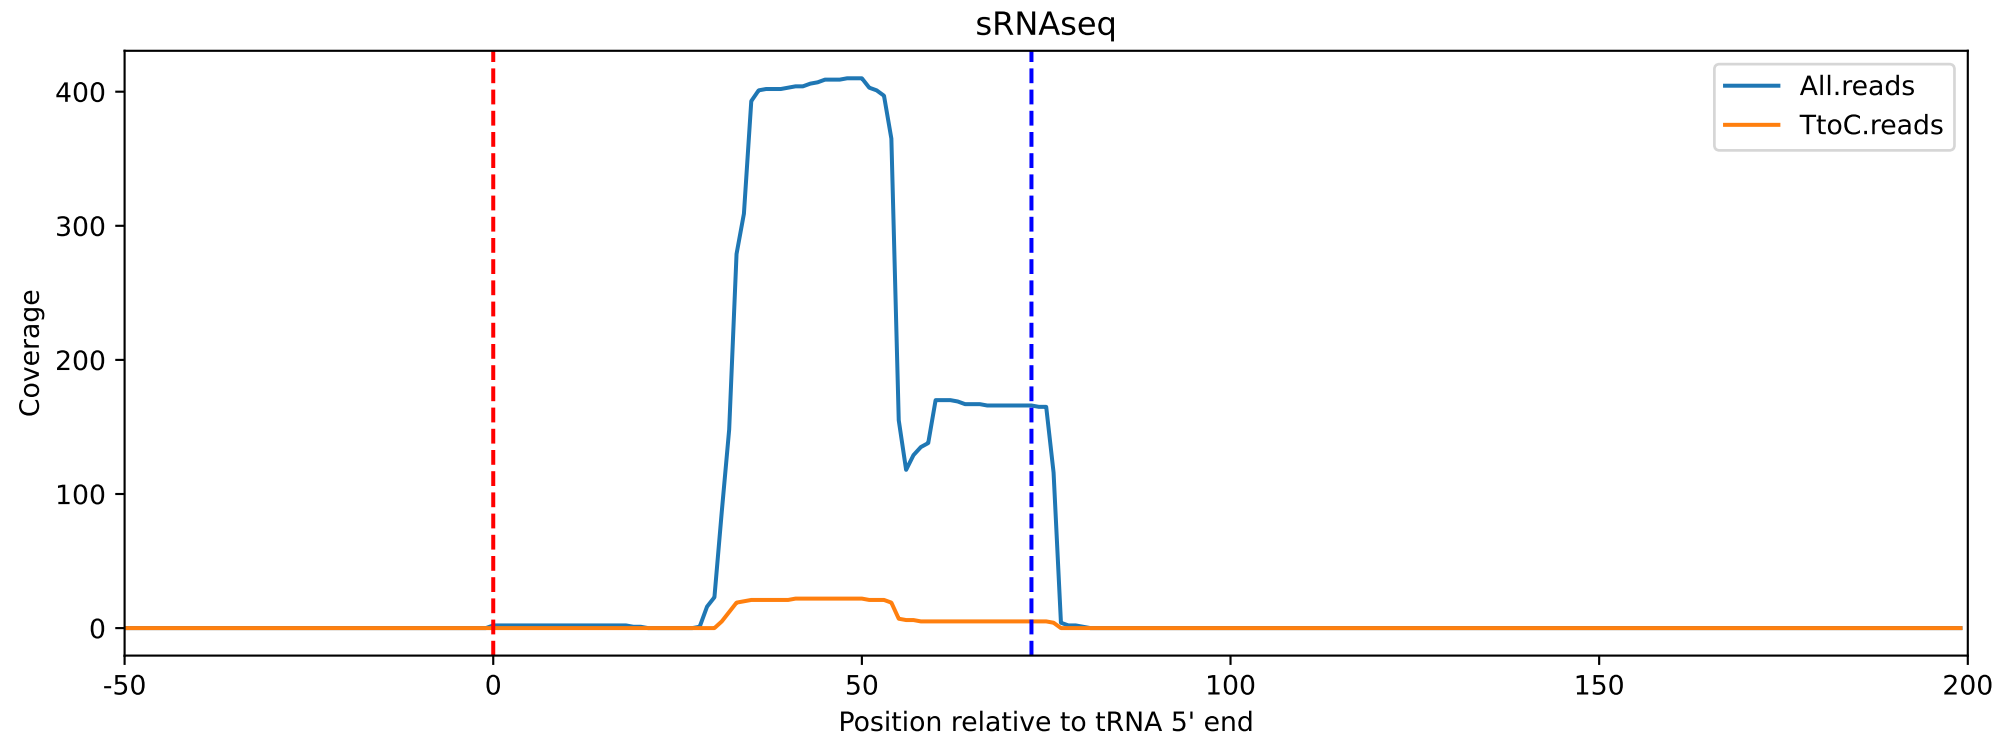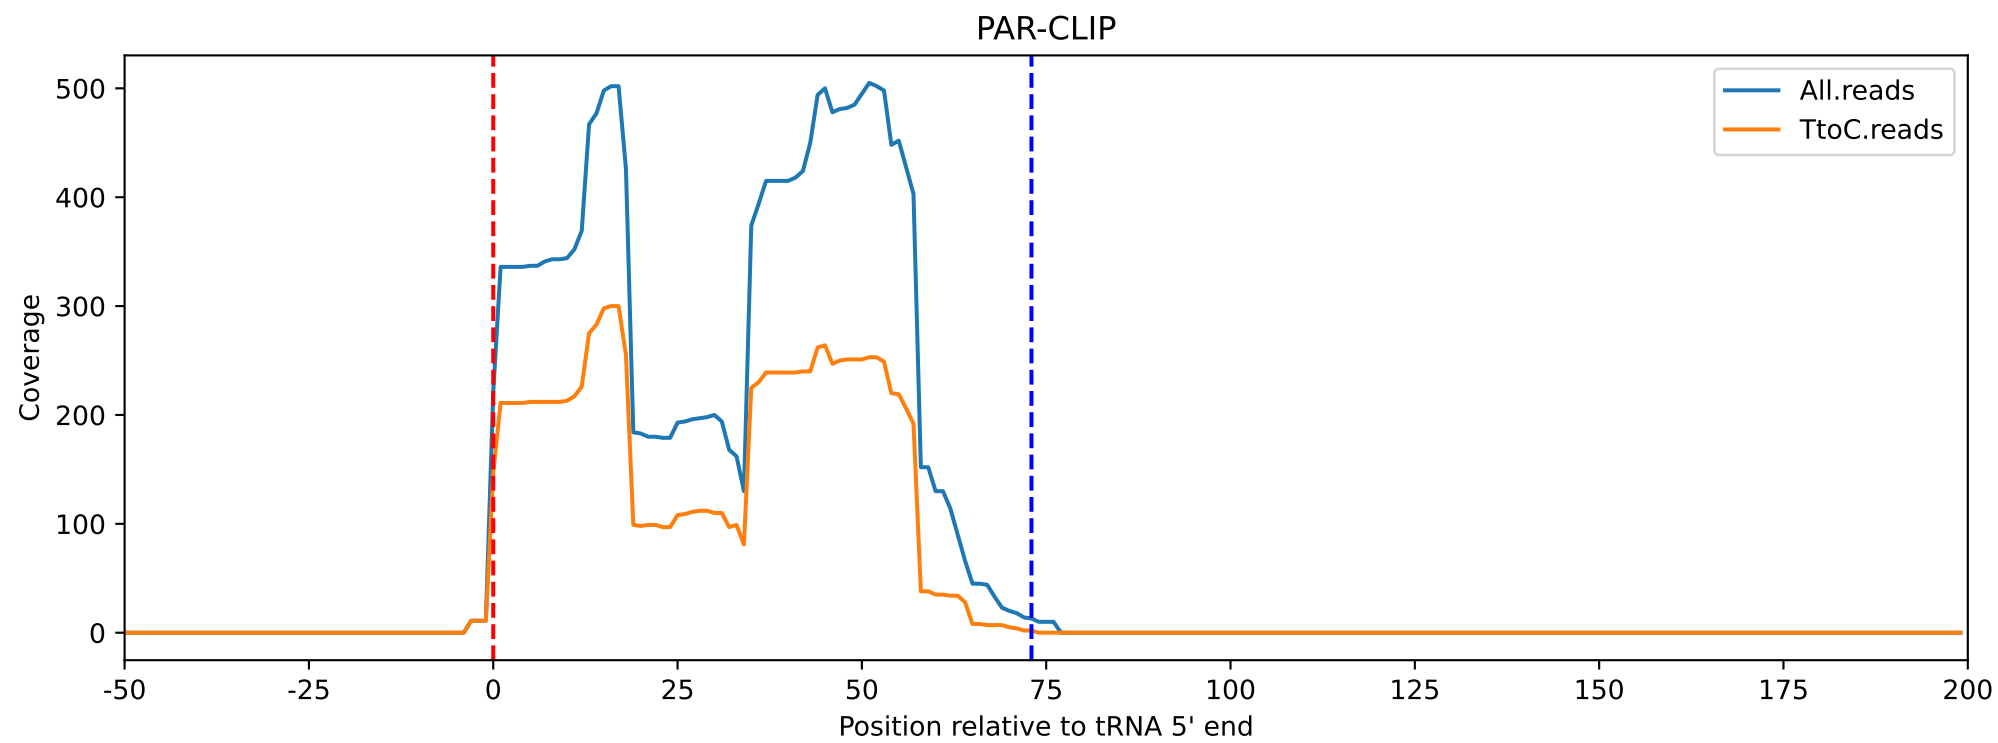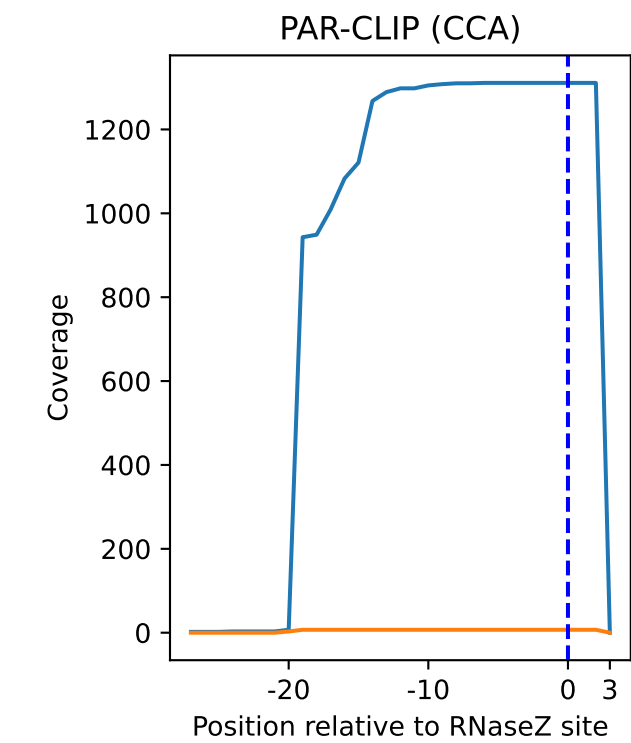



# tRNA-Asn-GTT-1-8

## sRNAseq

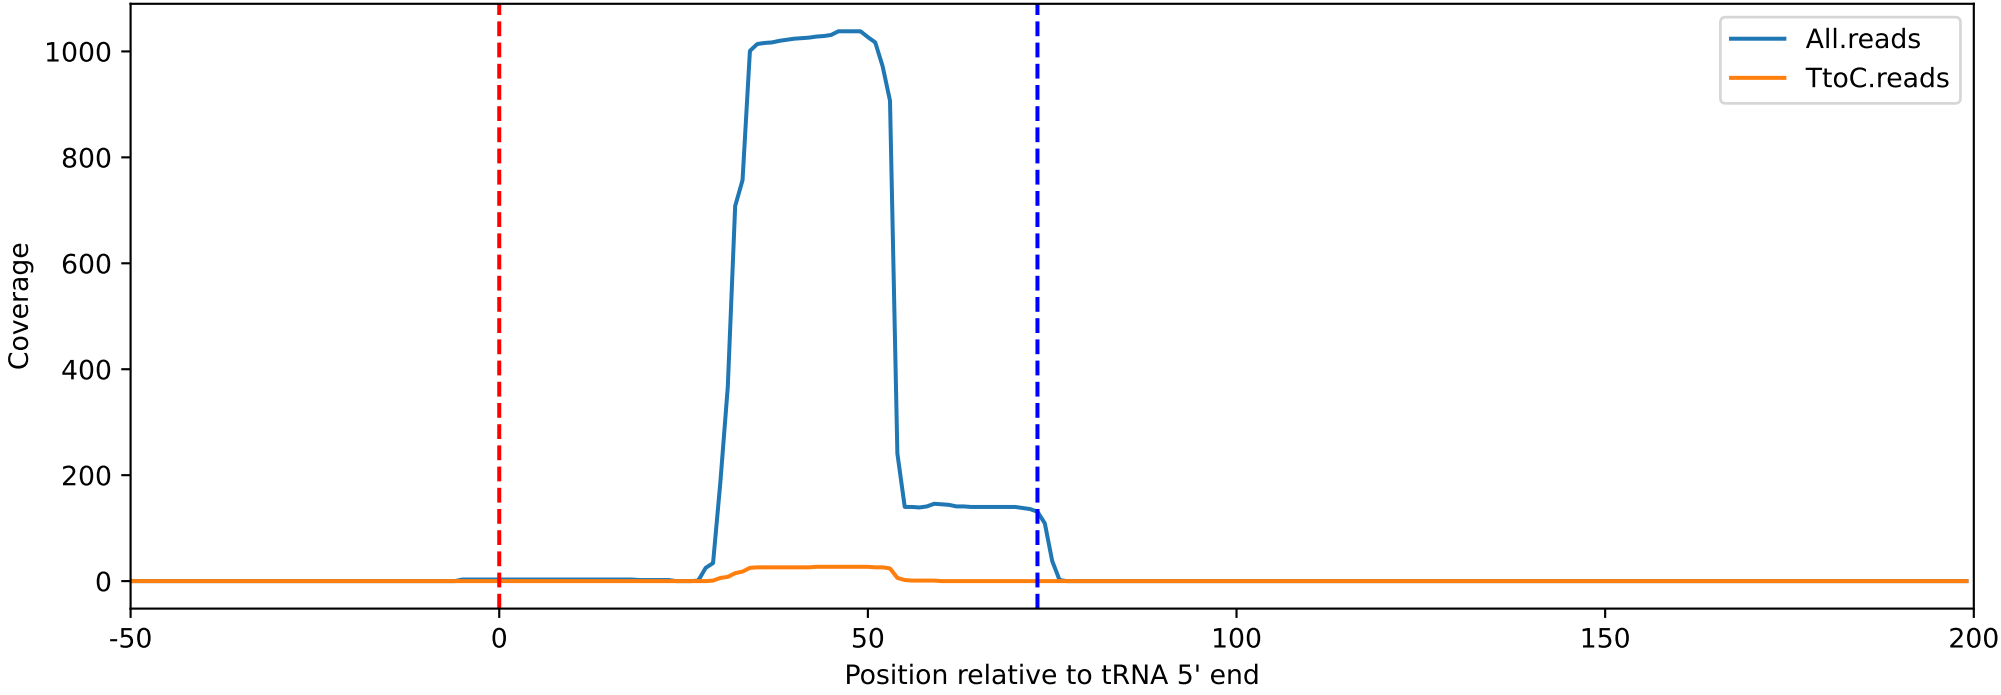

## sRNAseq (CCA)

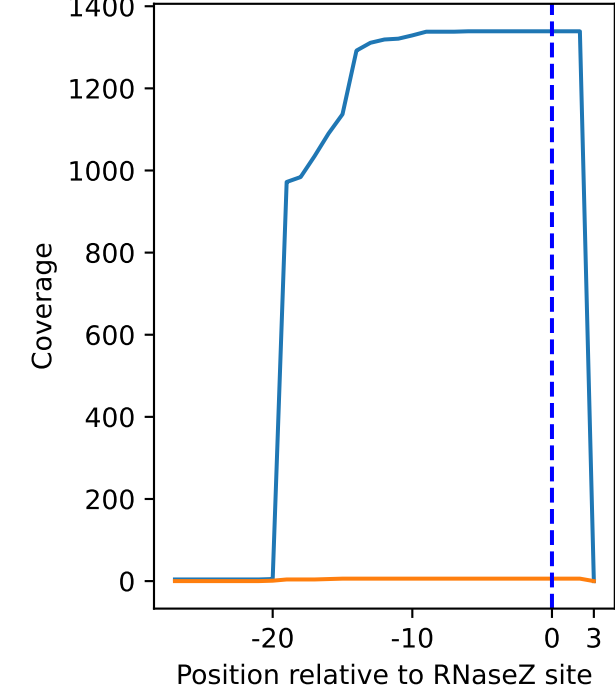

## PAR-CLIP

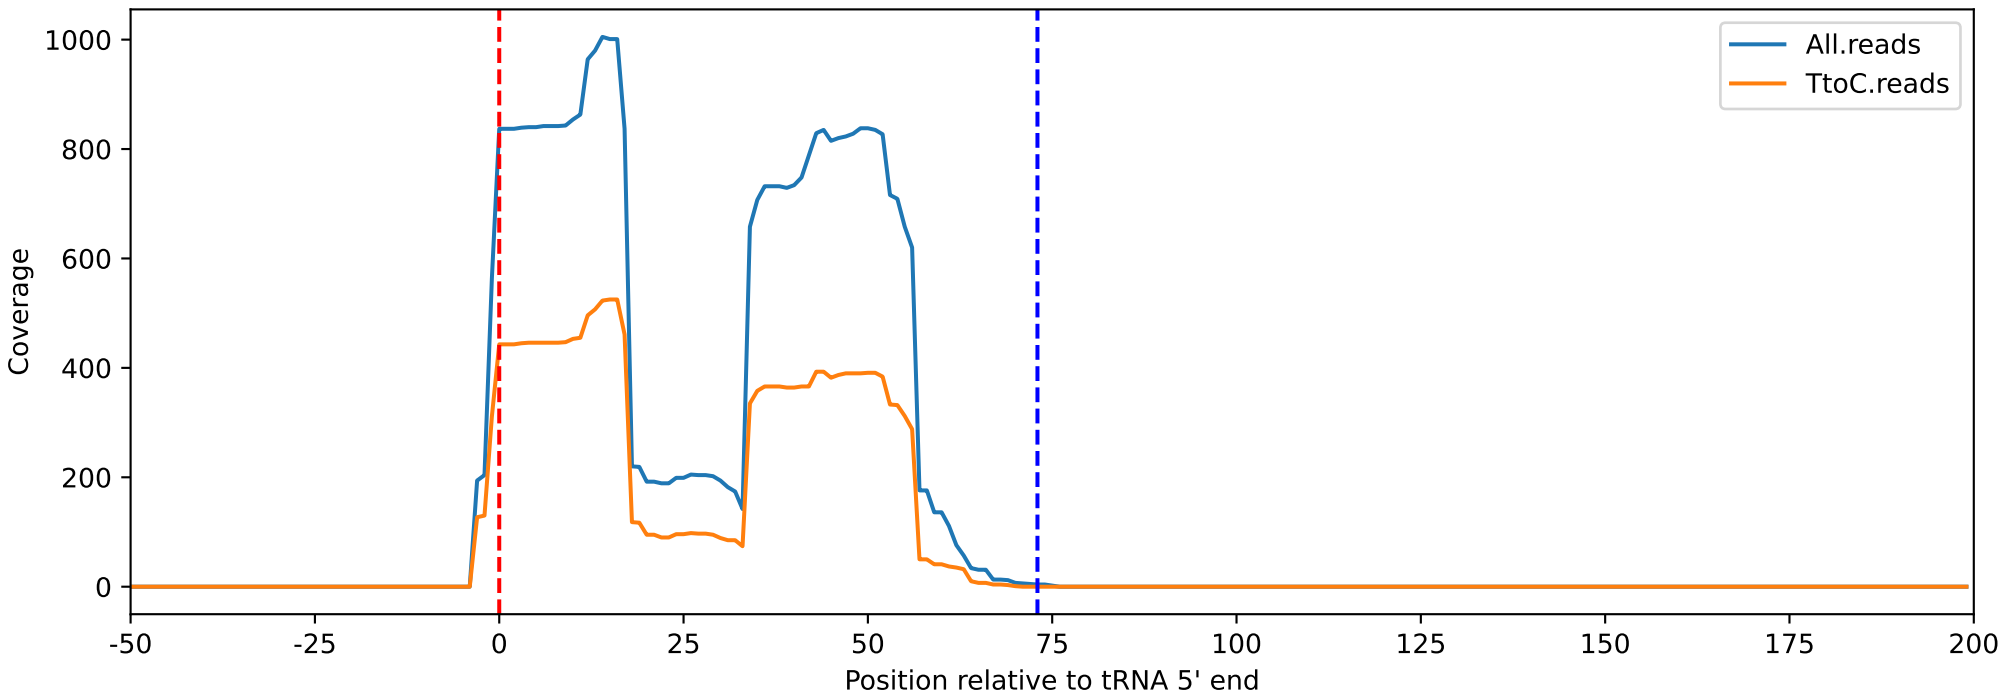

## PAR-CLIP (CCA)

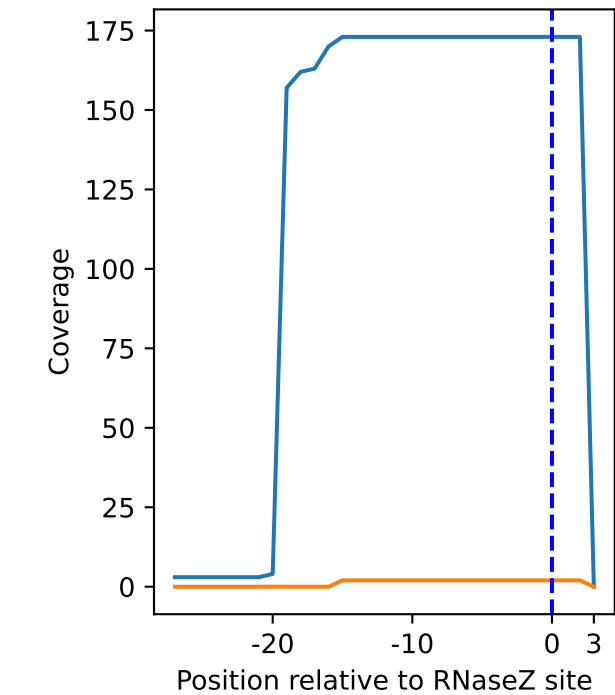

# tRNA-Ile-AAT-2-1

## sRNAseq

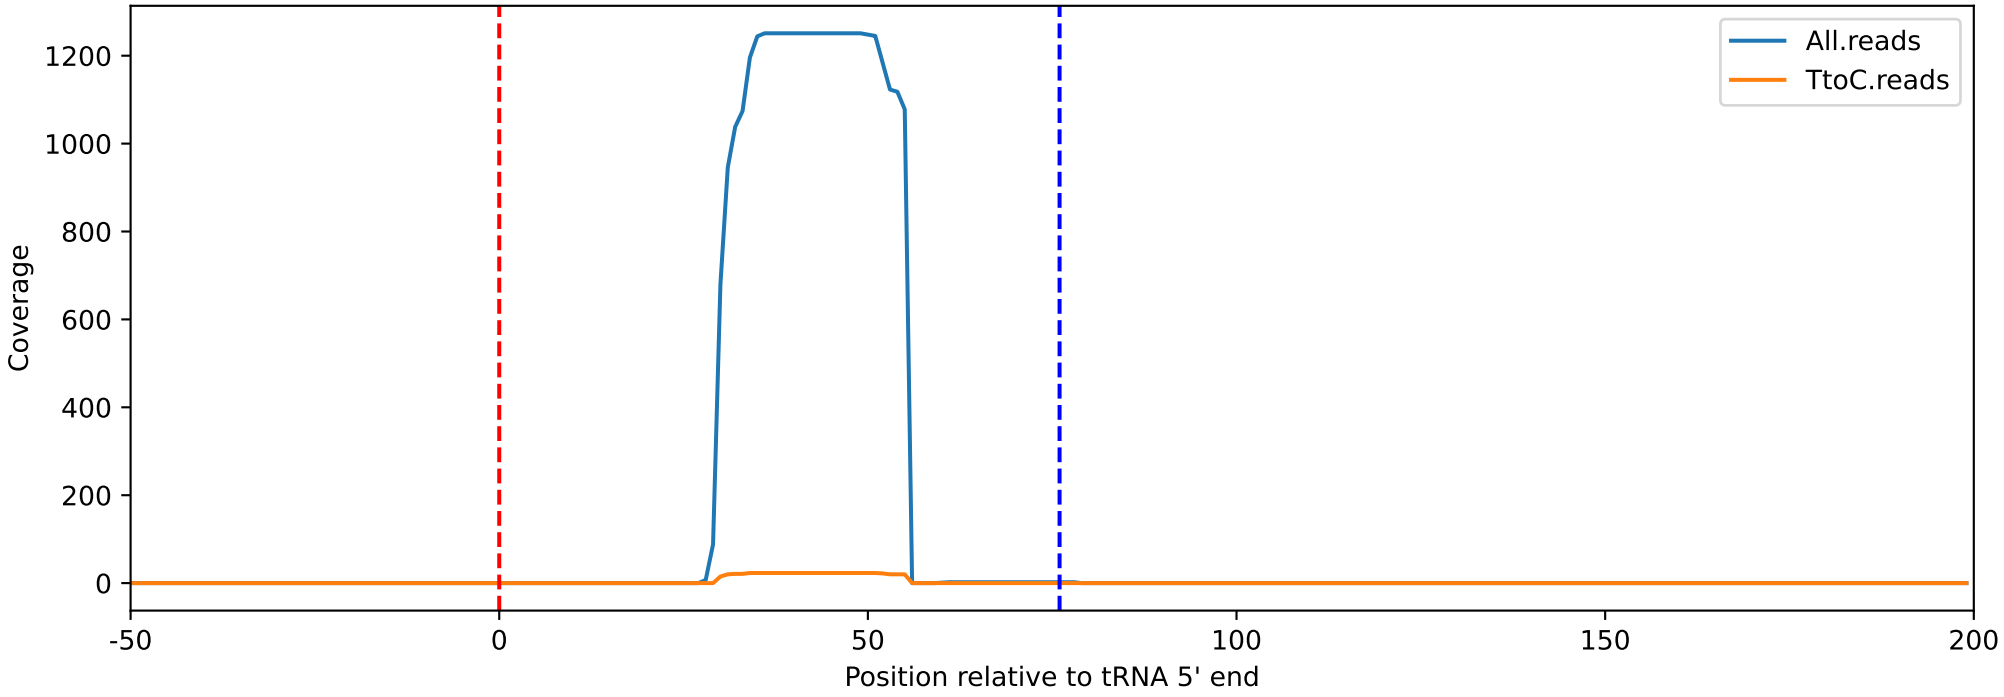

## sRNAseq (CCA)

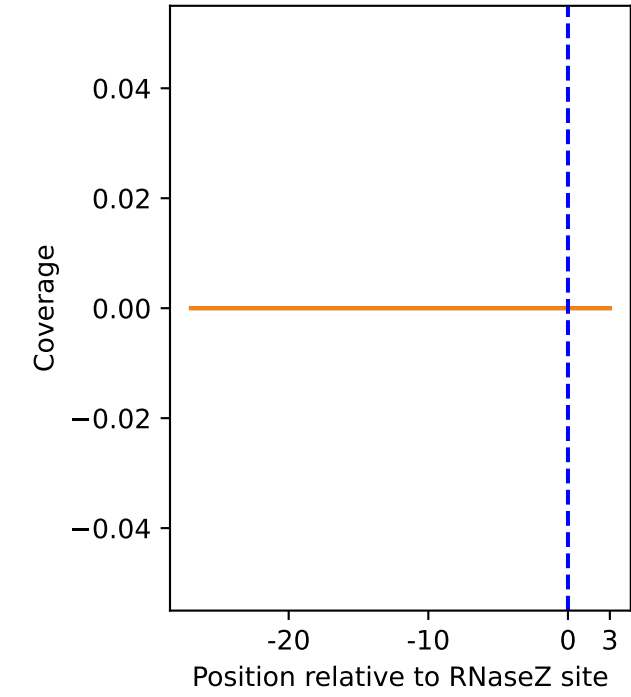

## PAR-CLIP

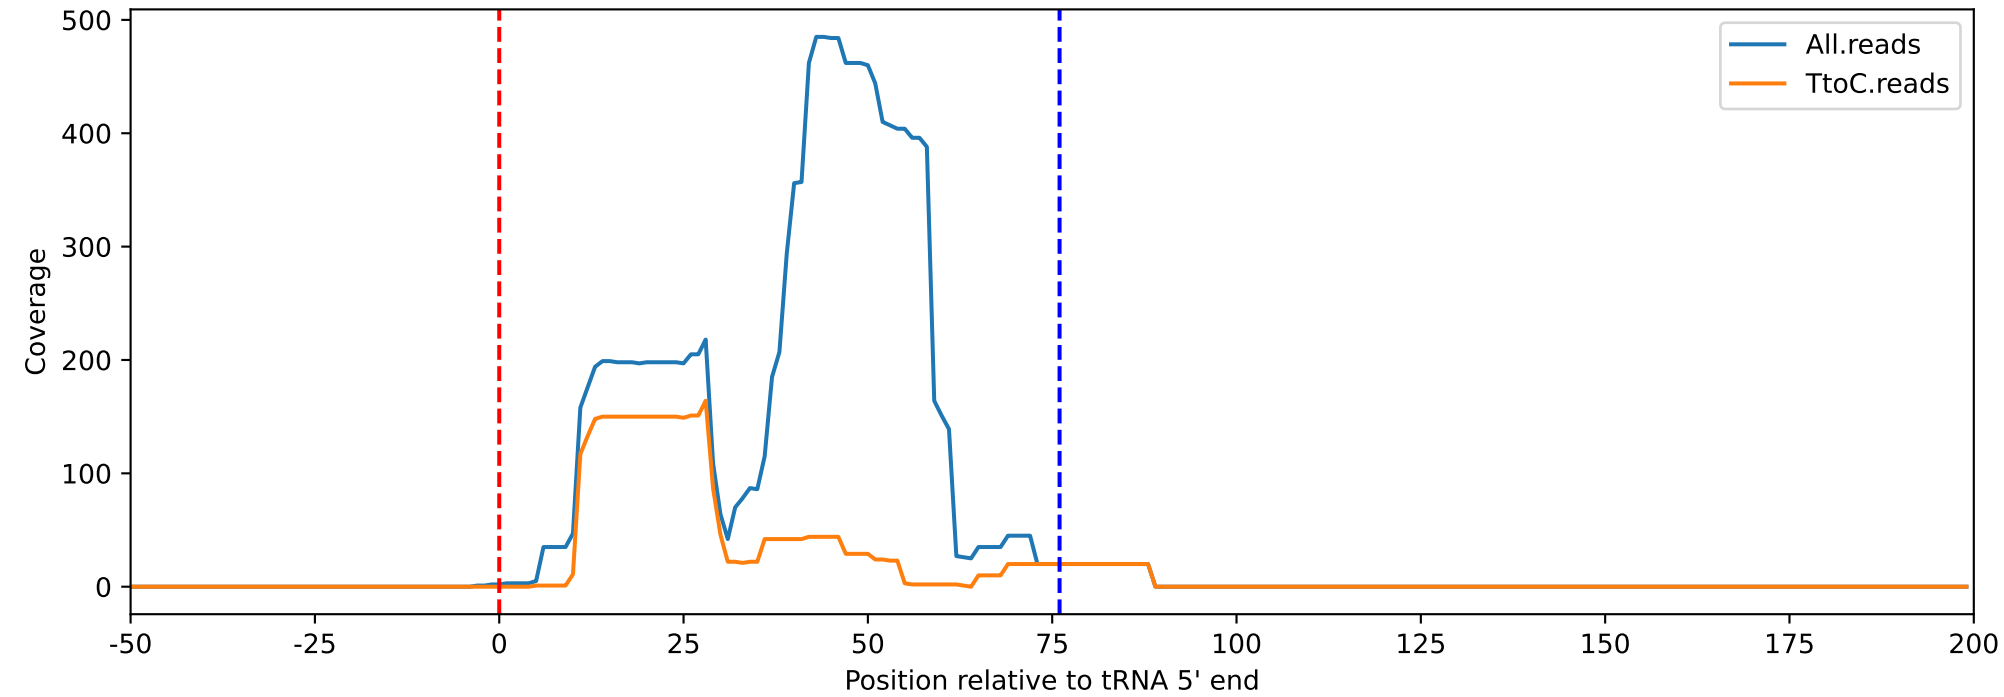

## PAR-CLIP (CCA)

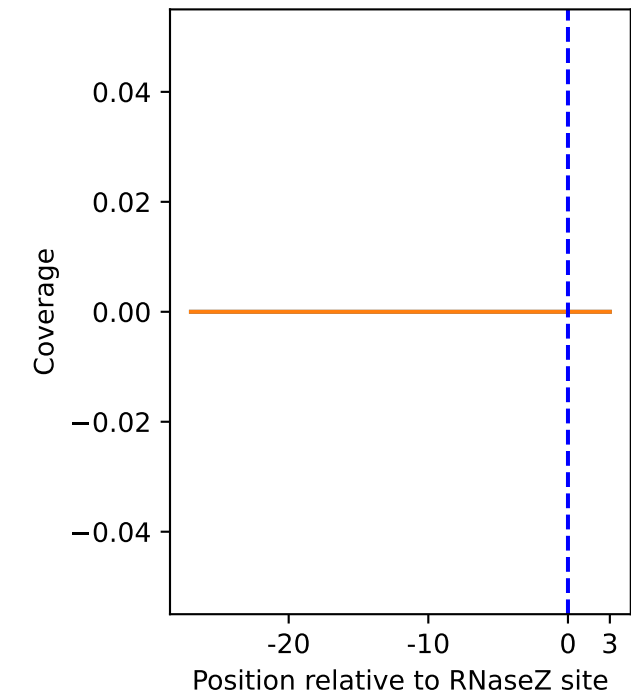

# tRNA-Asn-GTT-1-1

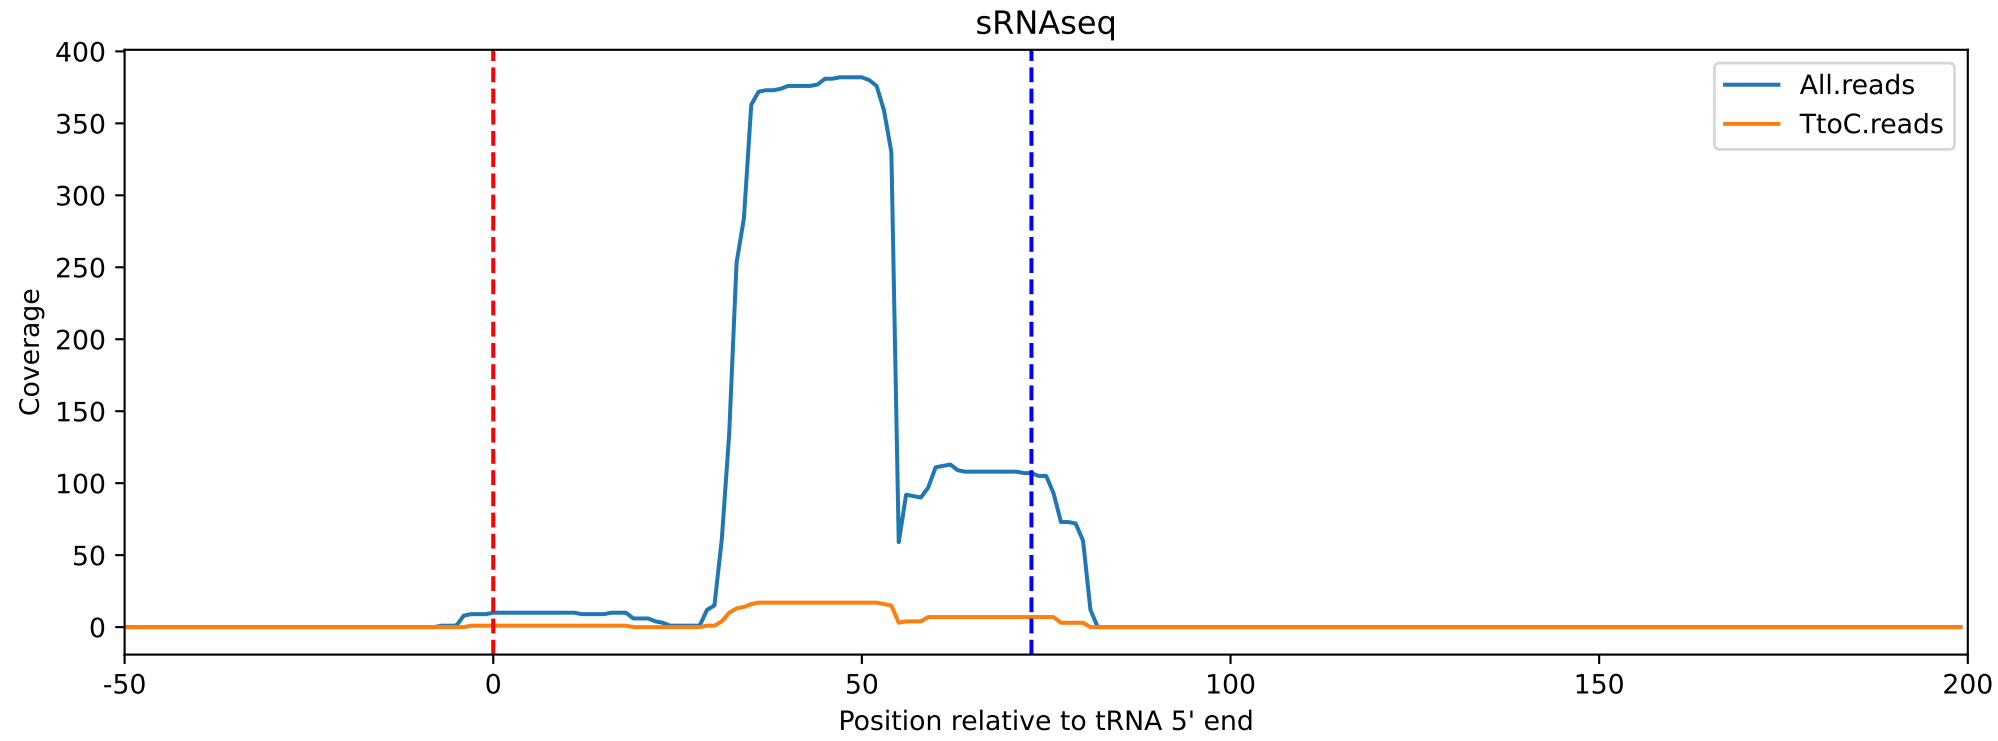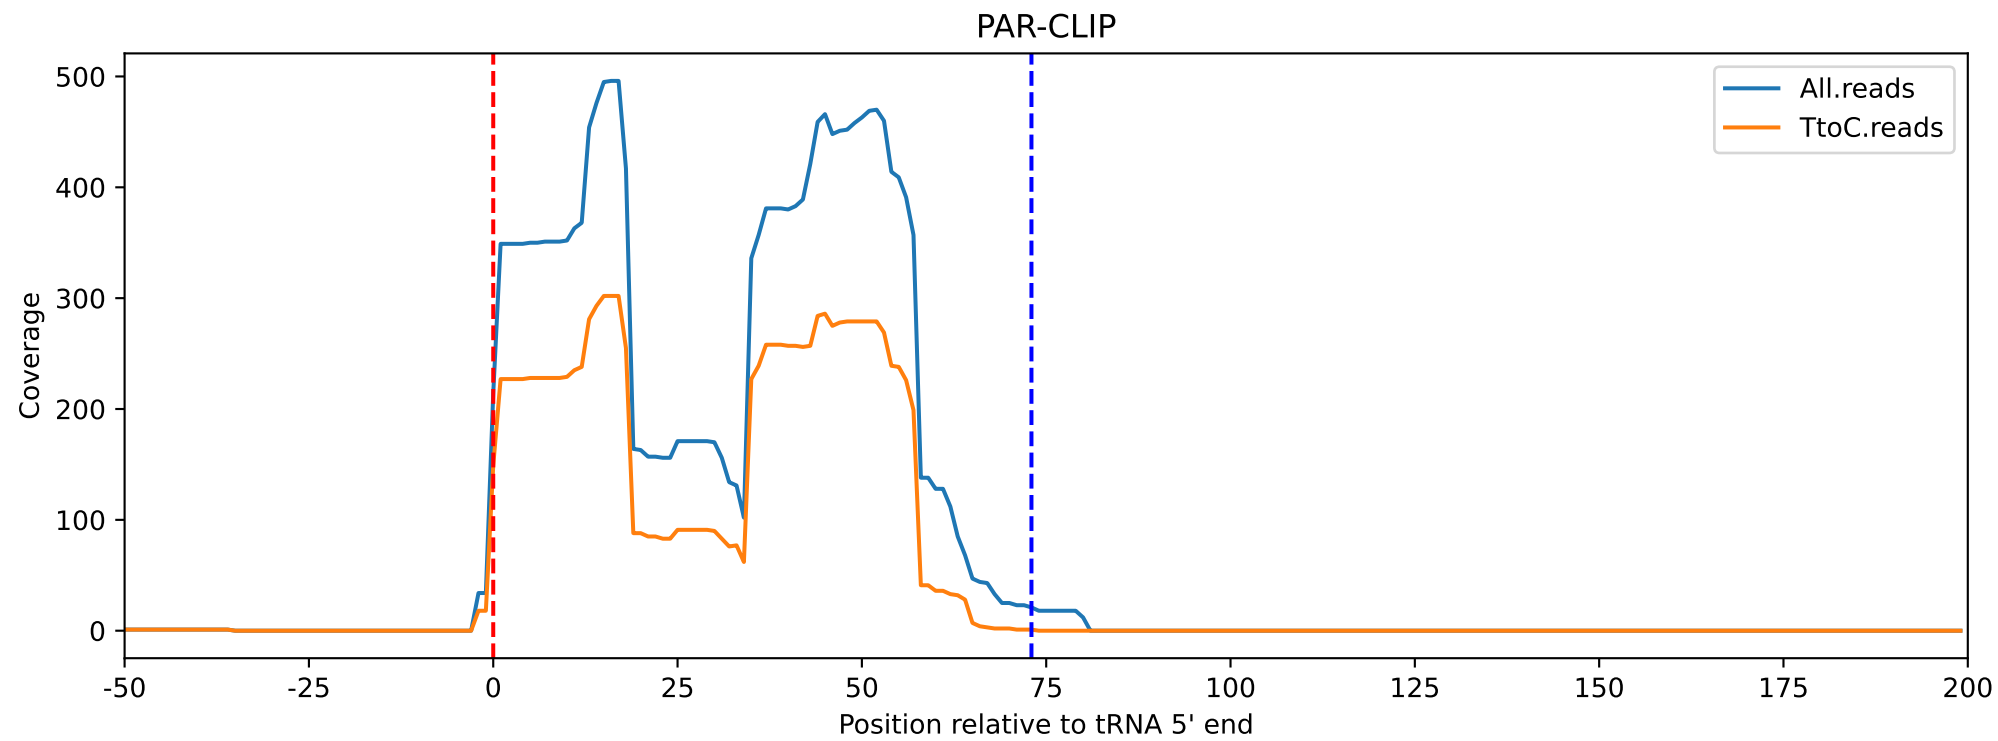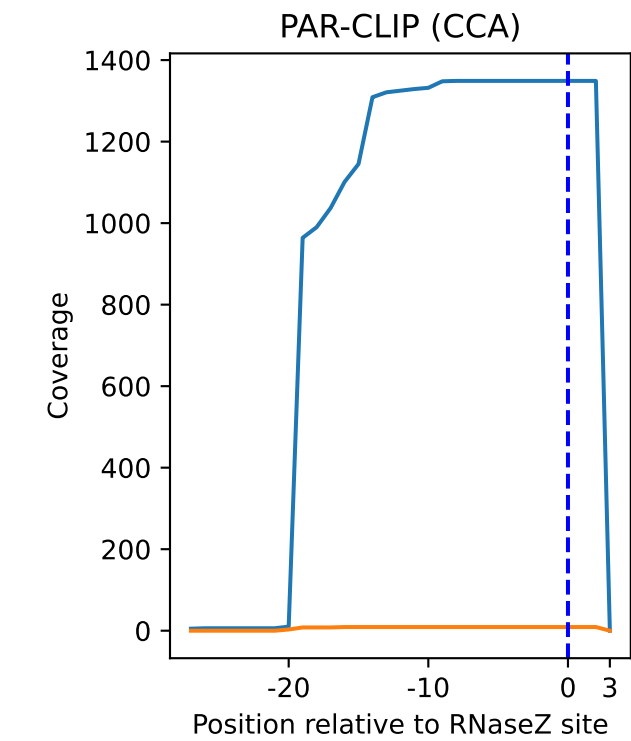

# tRNA-Cys-GCA-1-4

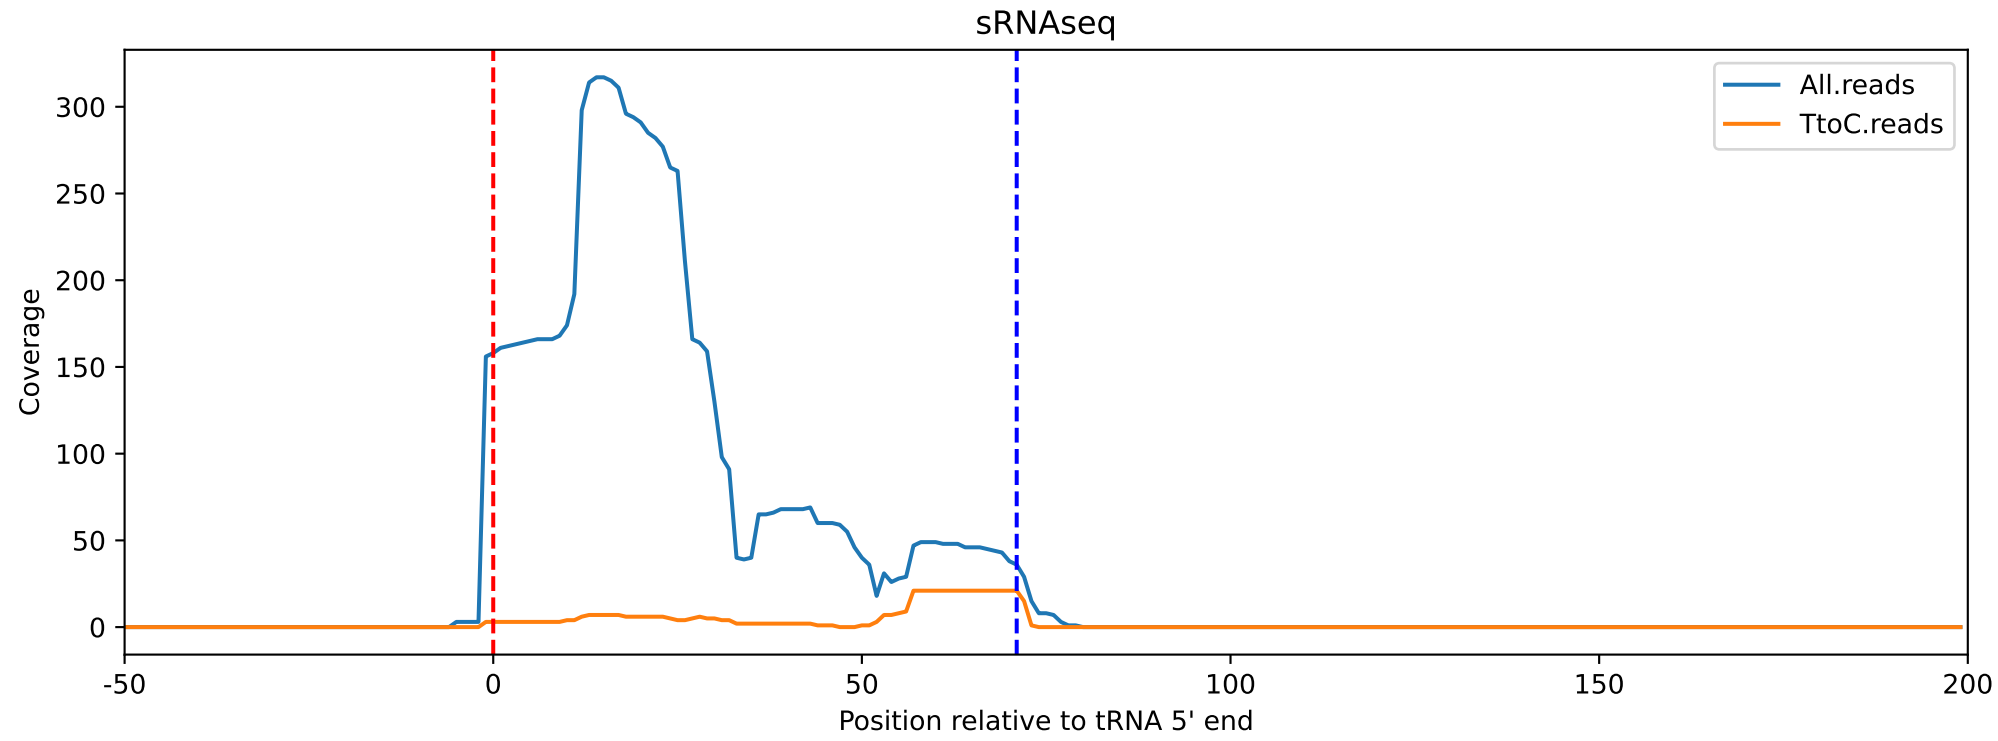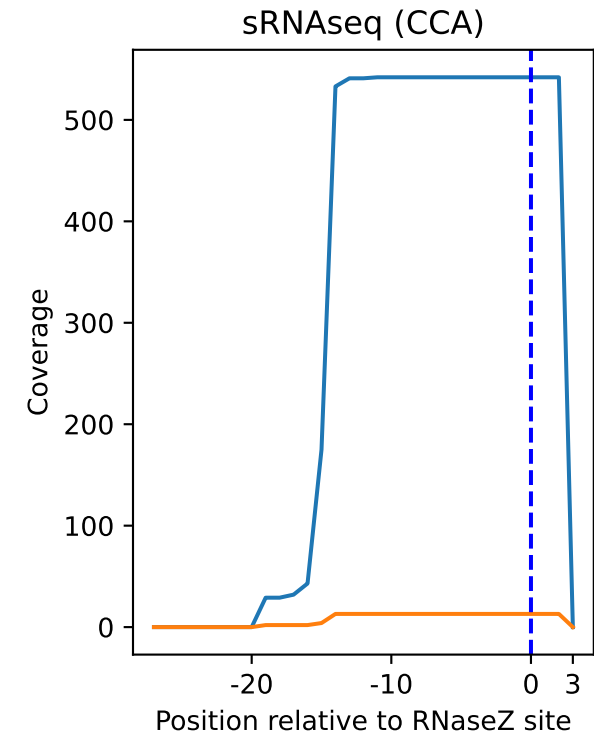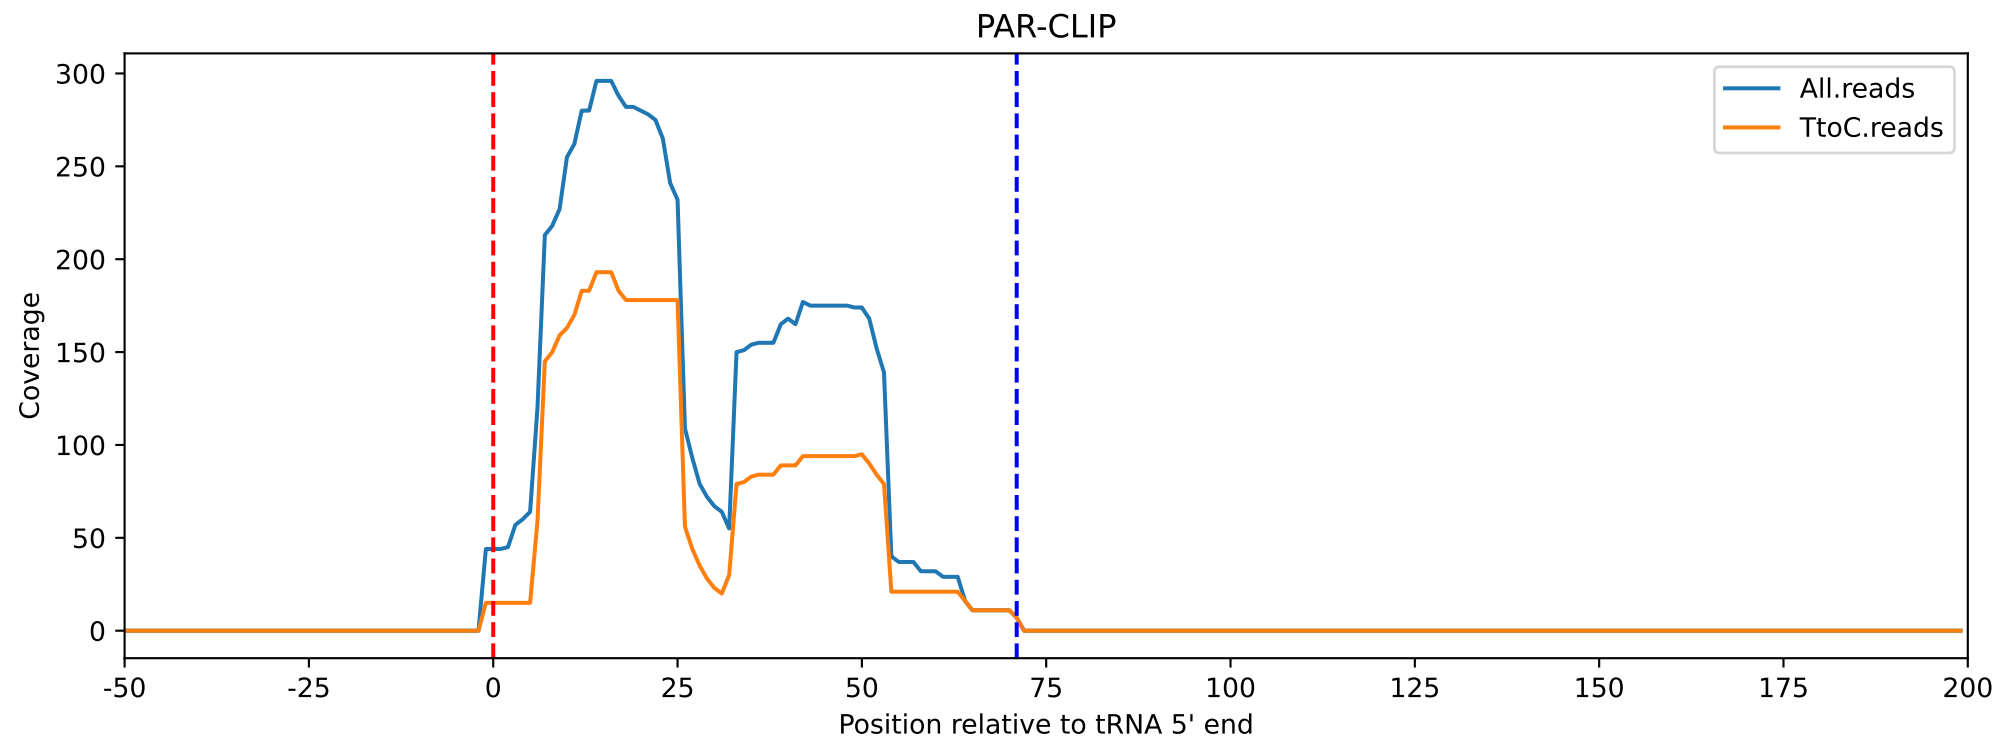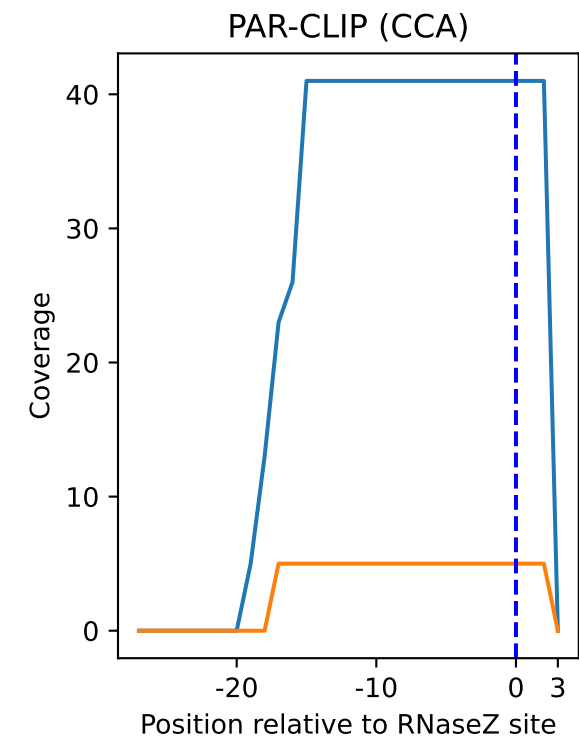

# tRNA-Asn-GTT-1-6

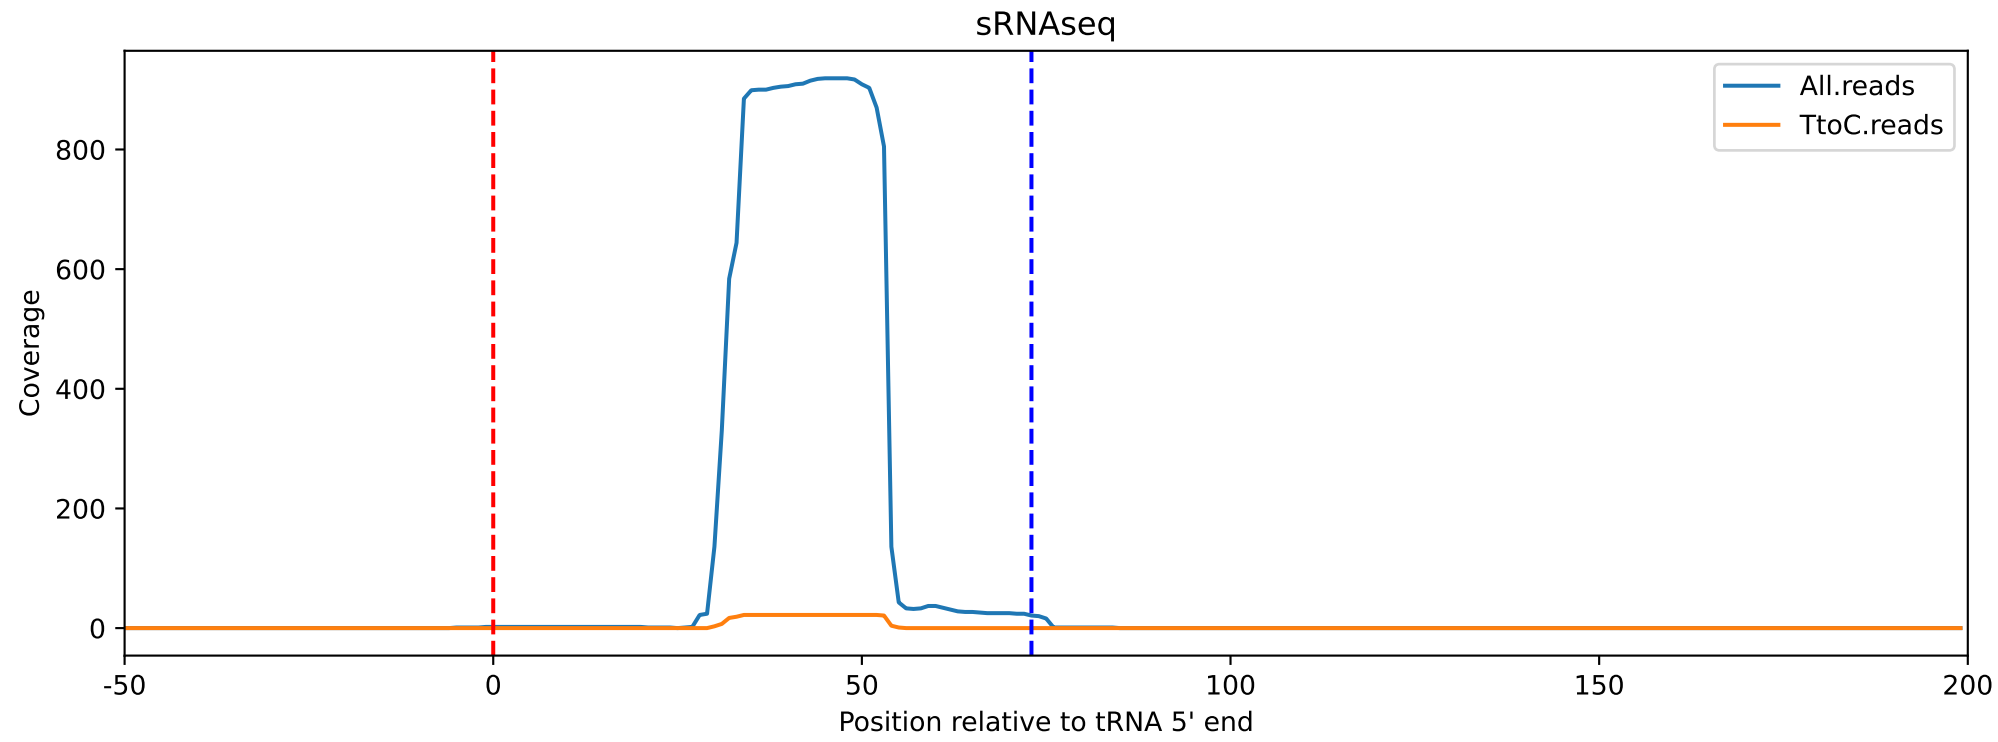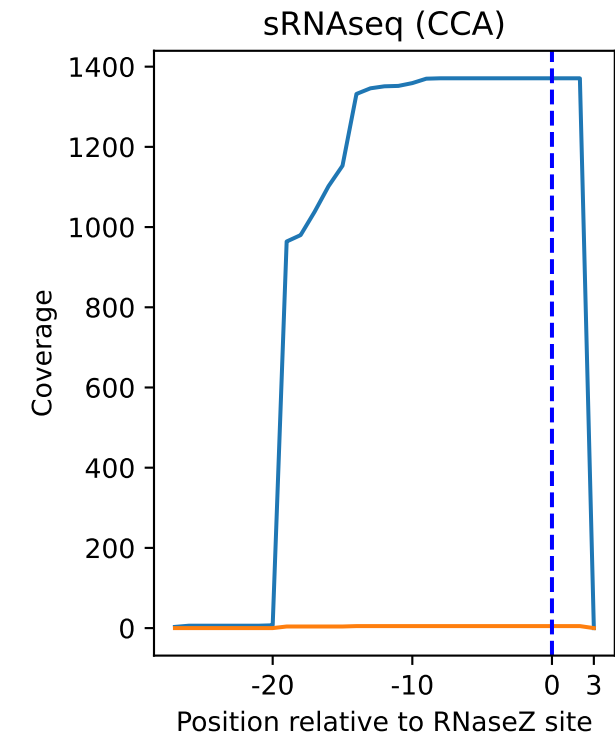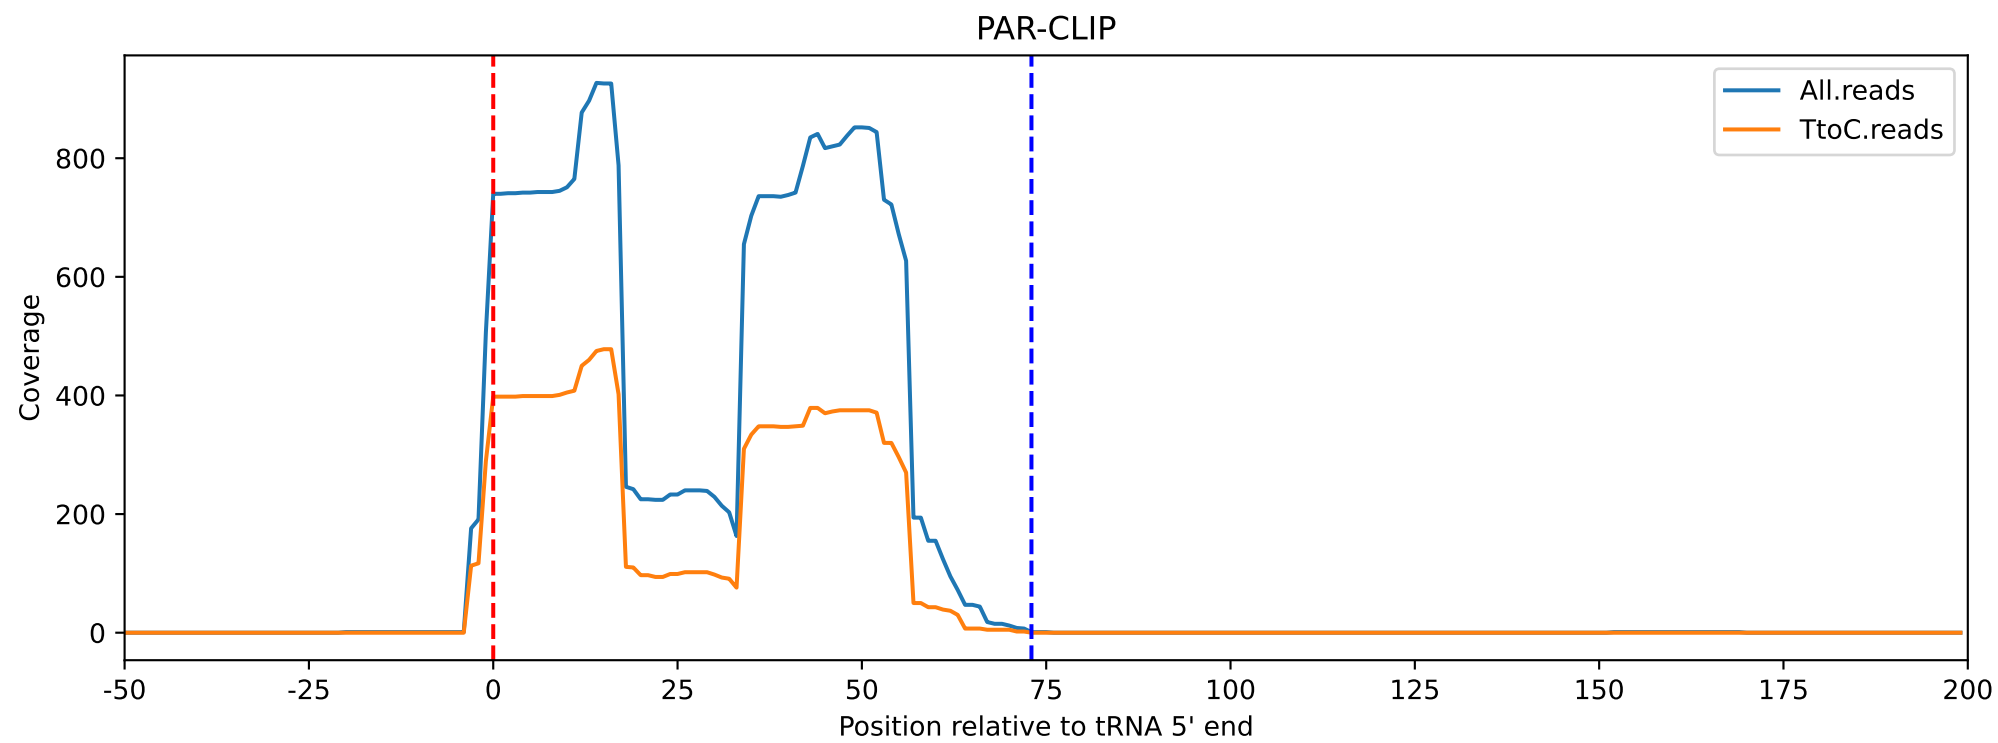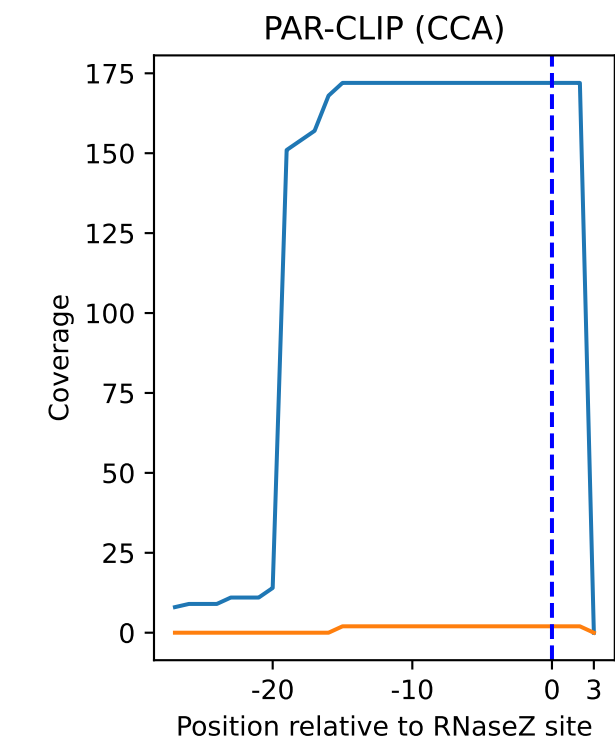

# tRNA-Cys-GCA-1-1

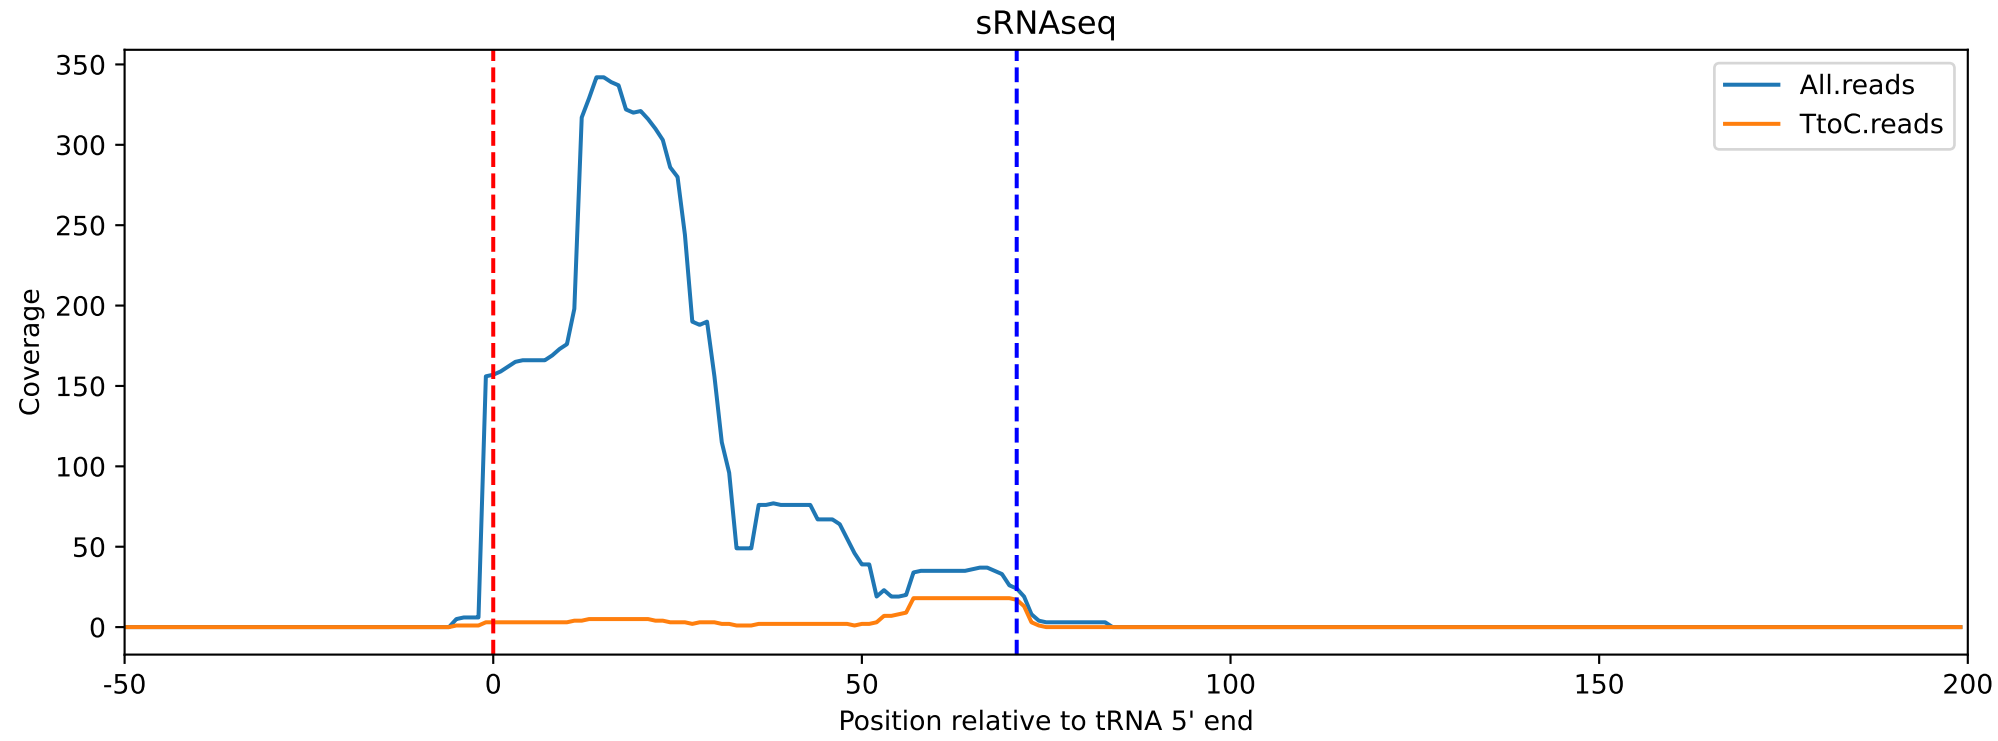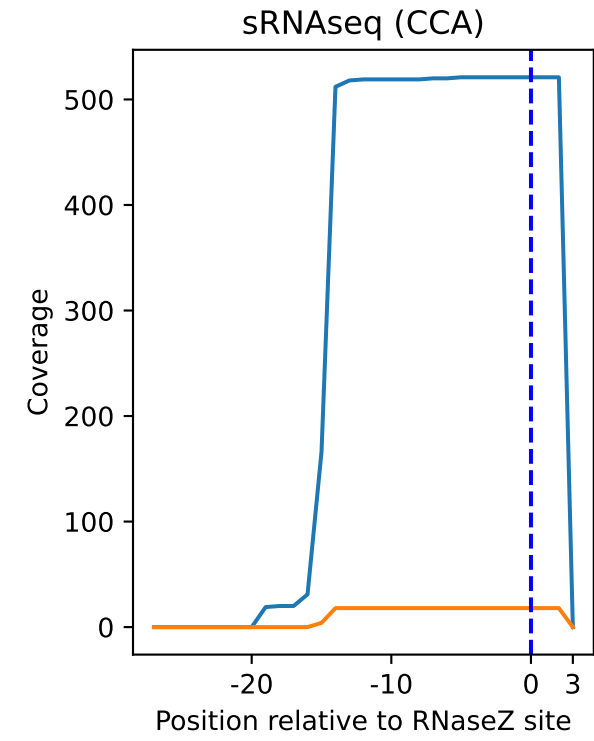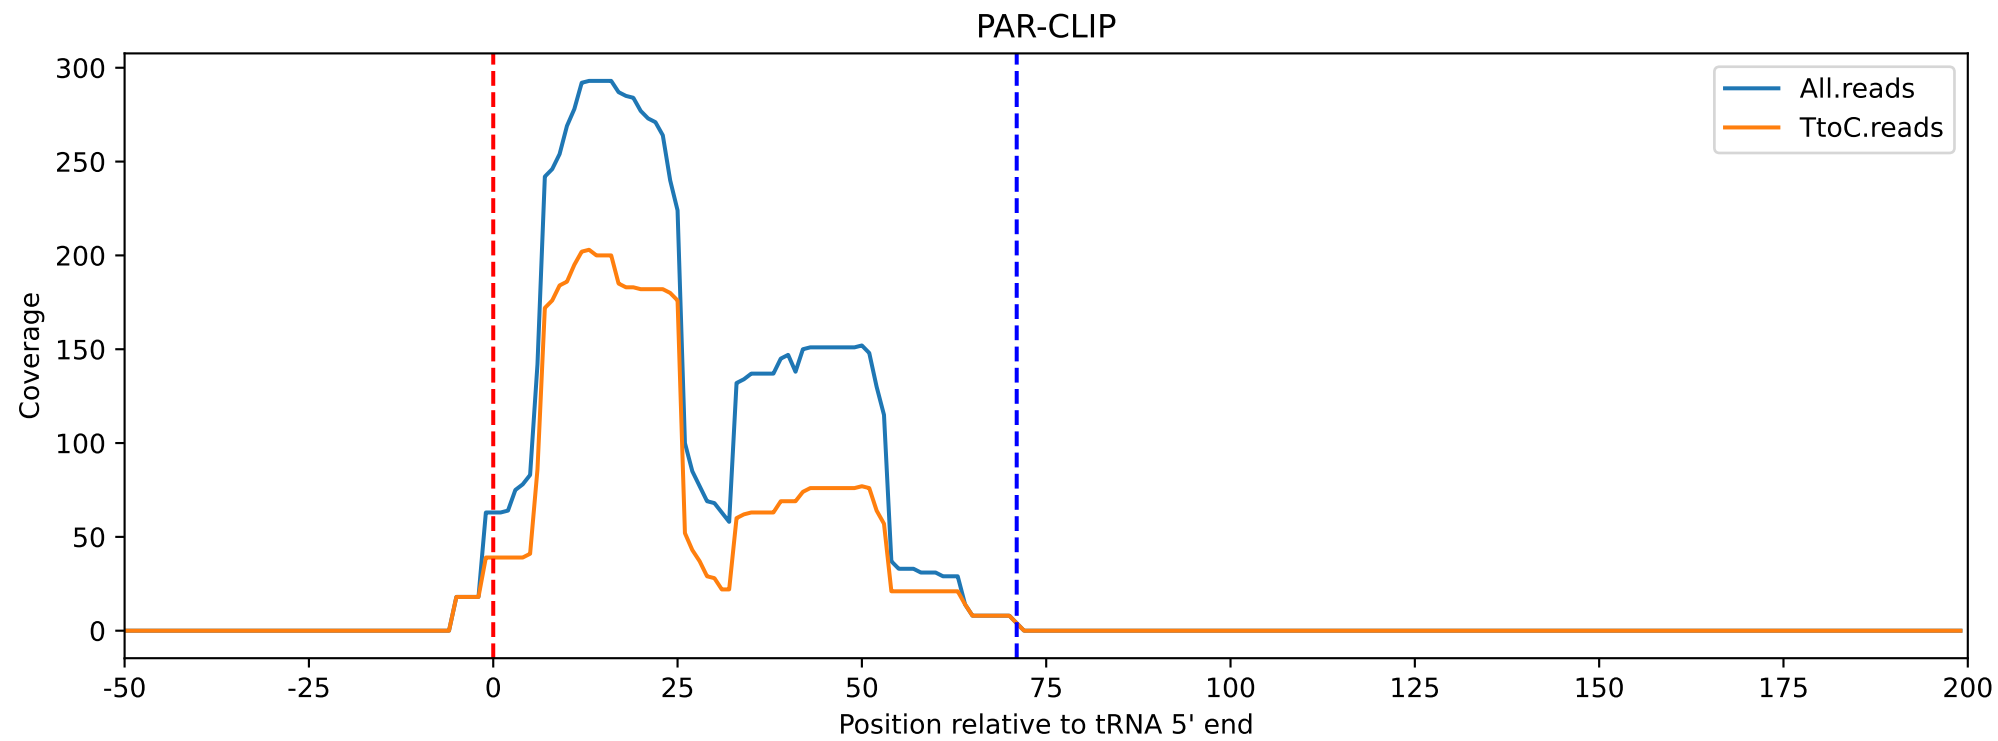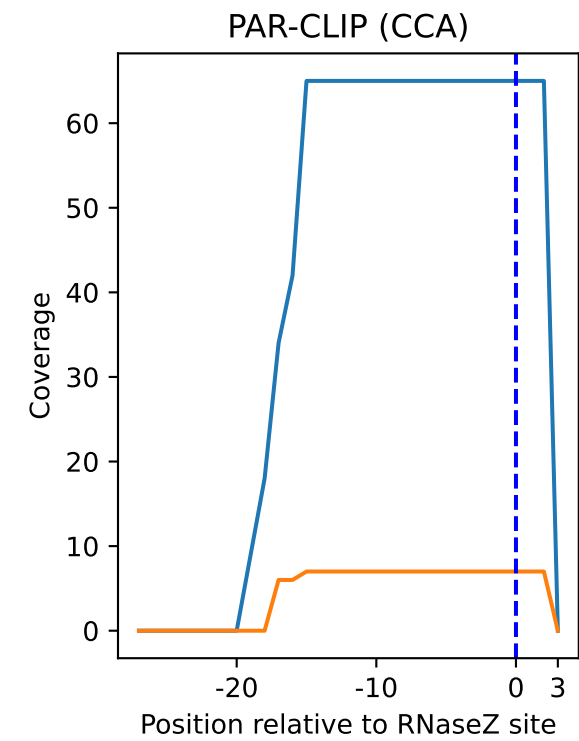

# tRNA-Ile-AAT-1-3

## sRNAseq

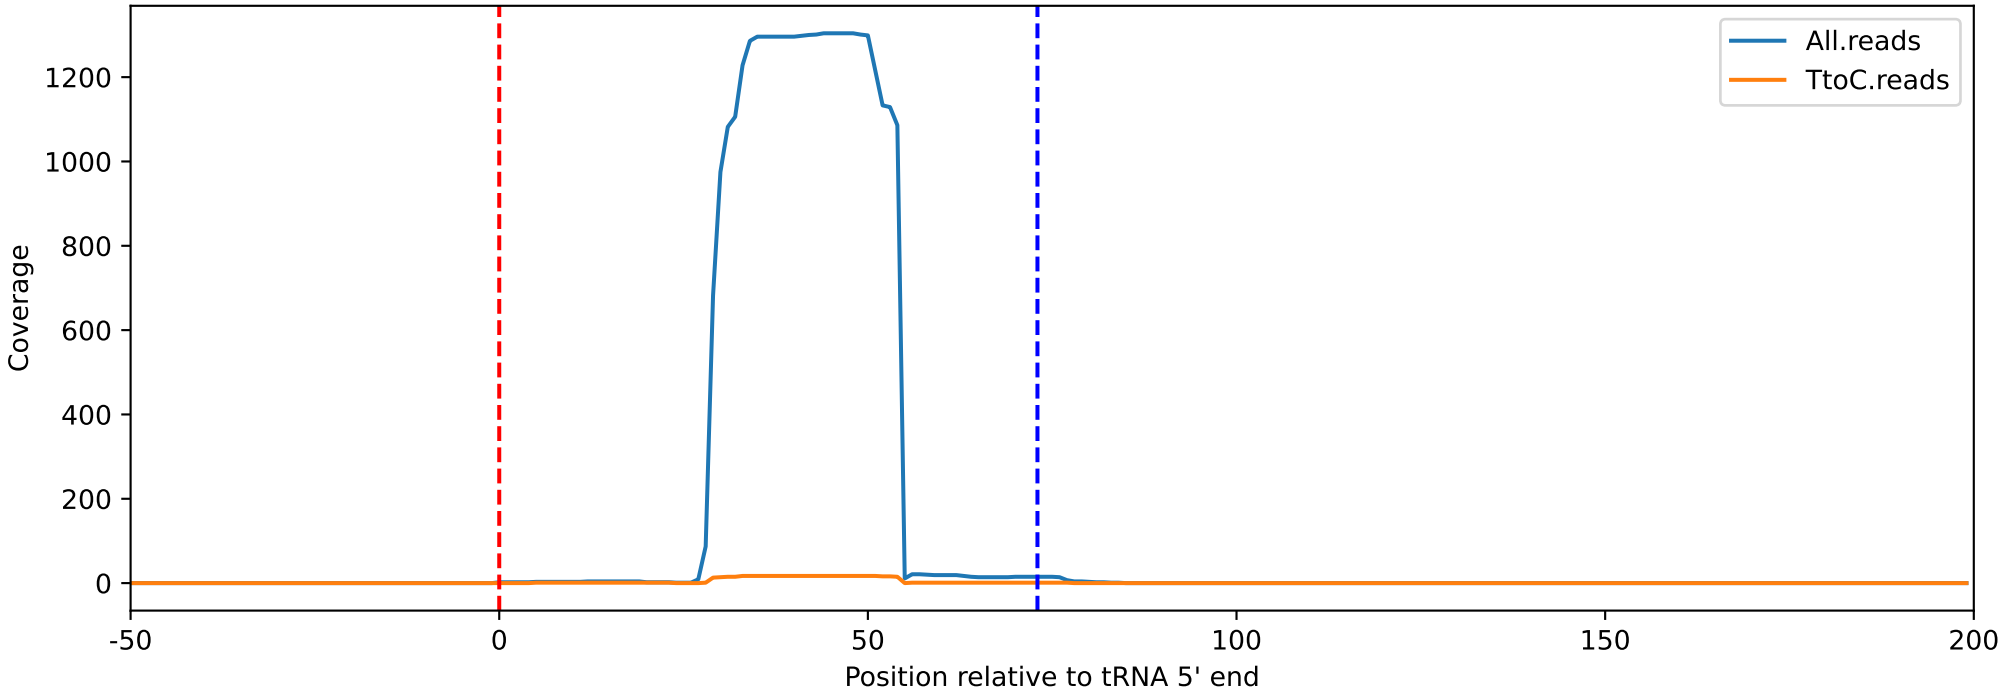

## sRNAseq (CCA)



## PAR-CLIP

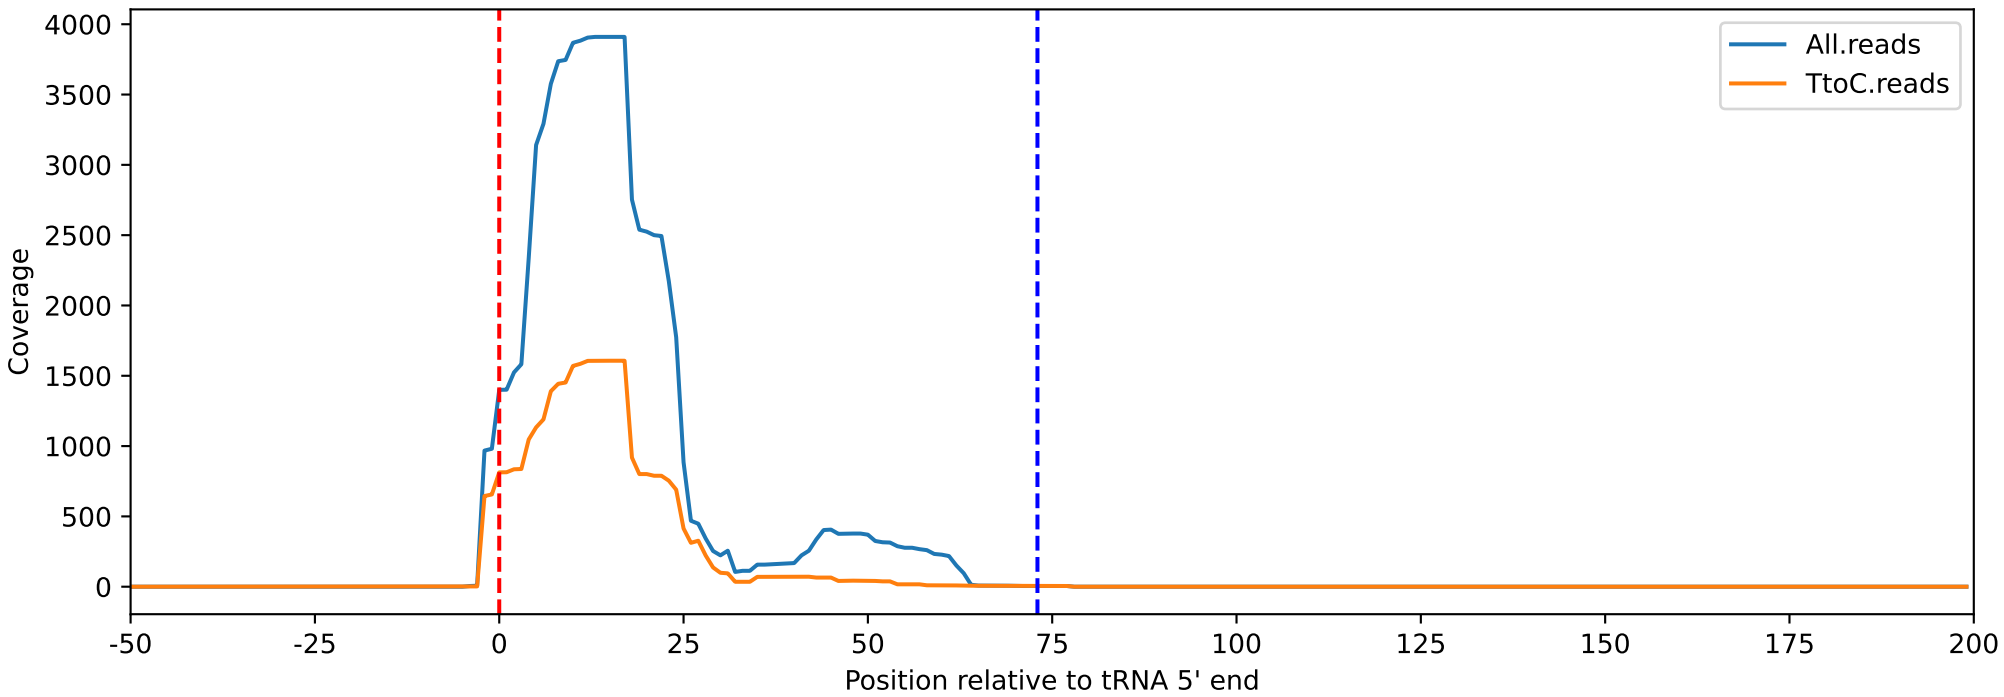

## PAR-CLIP (CCA)

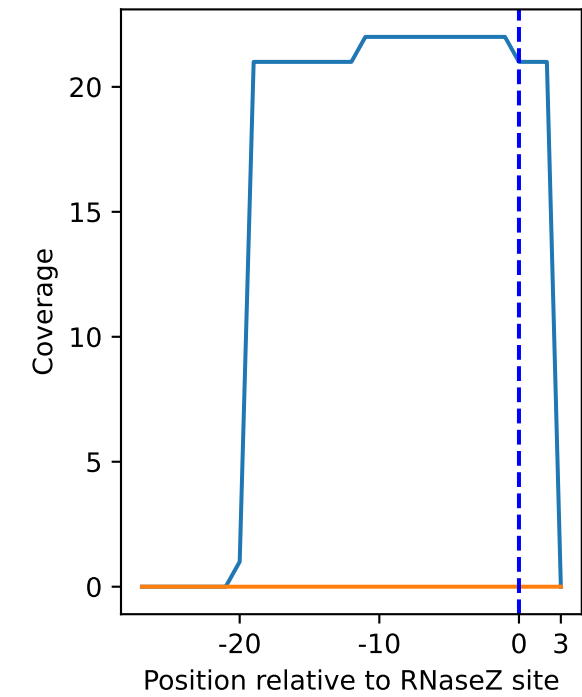

# tRNA-Asn-GTT-1-3

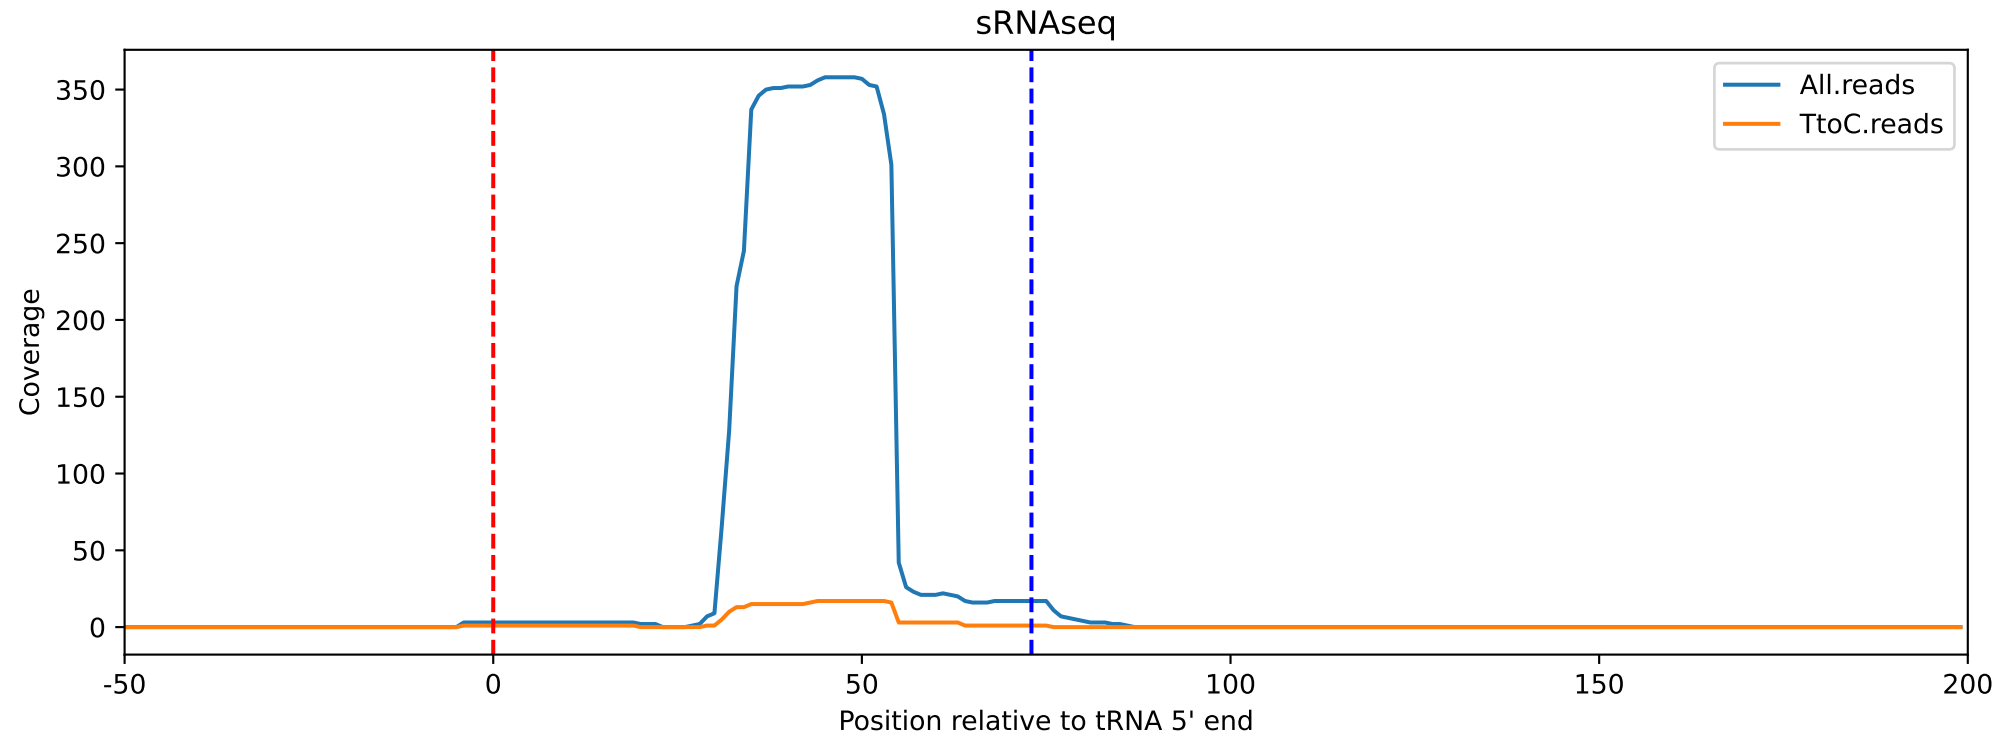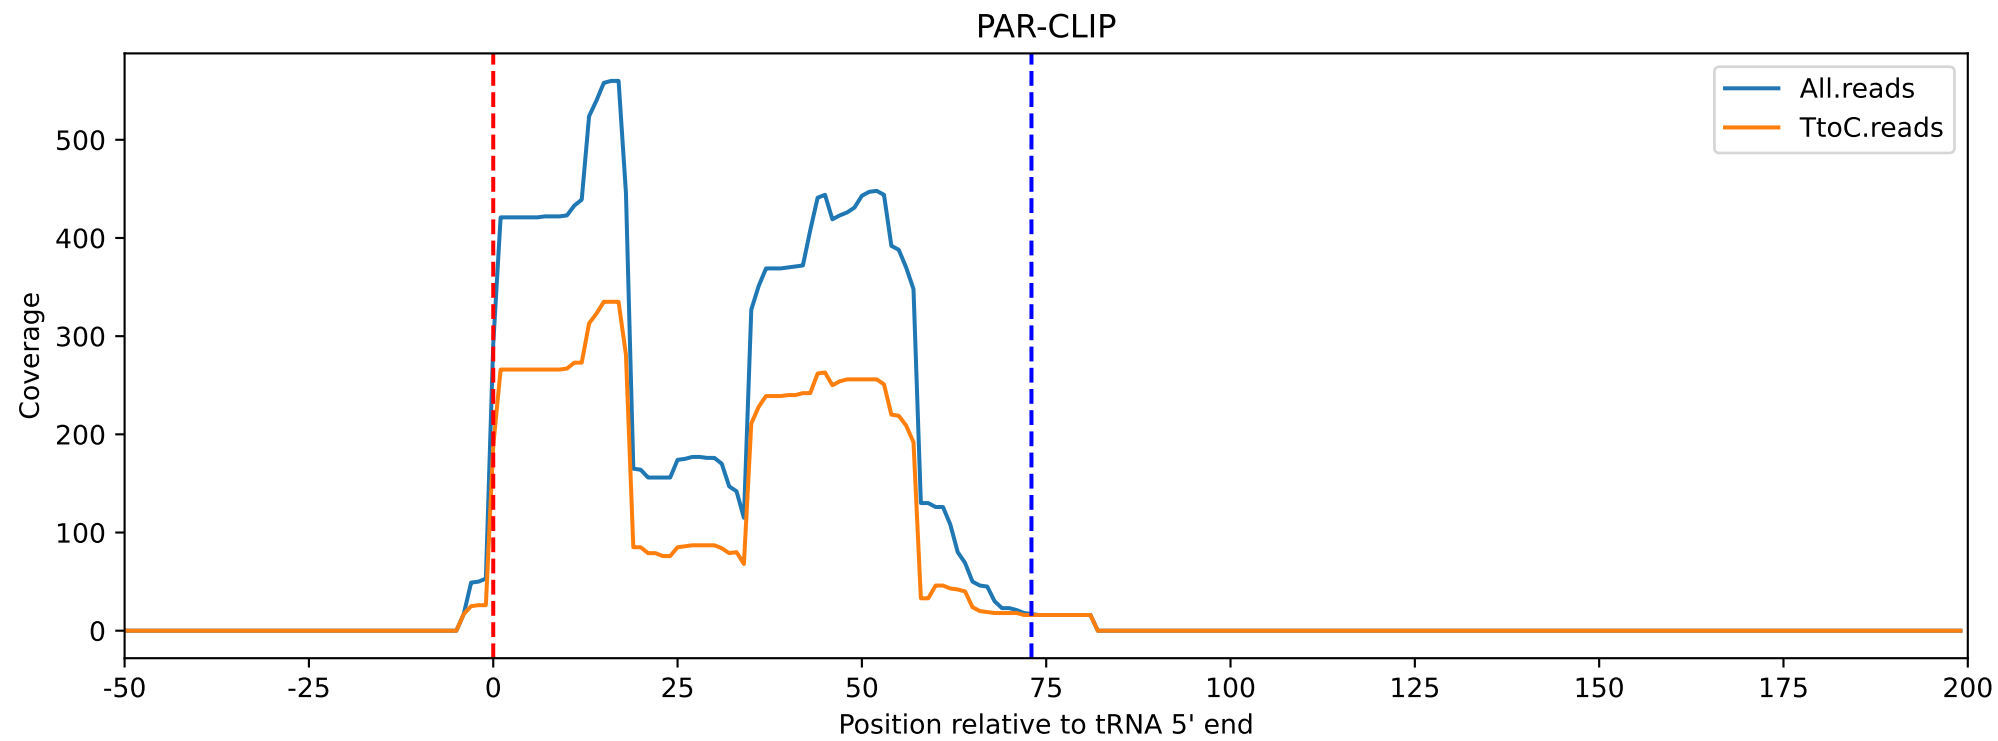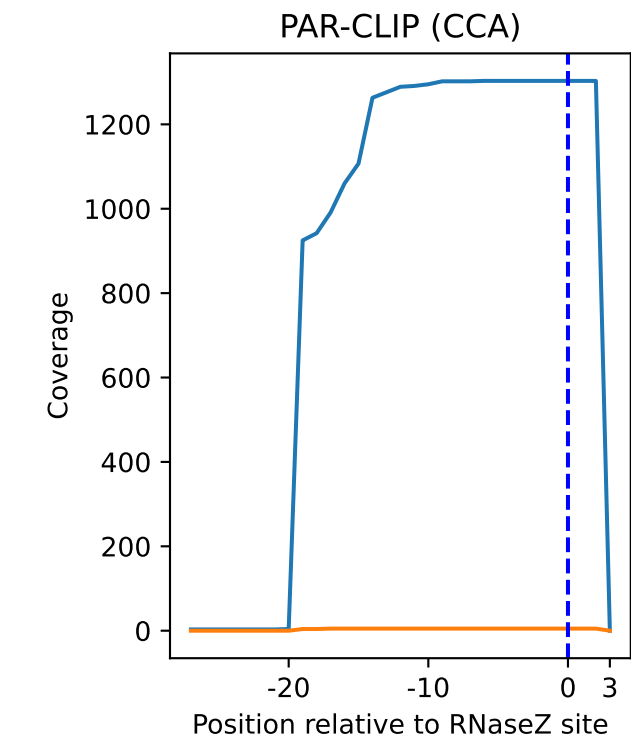



# tRNA-Ile-AAT-1-4

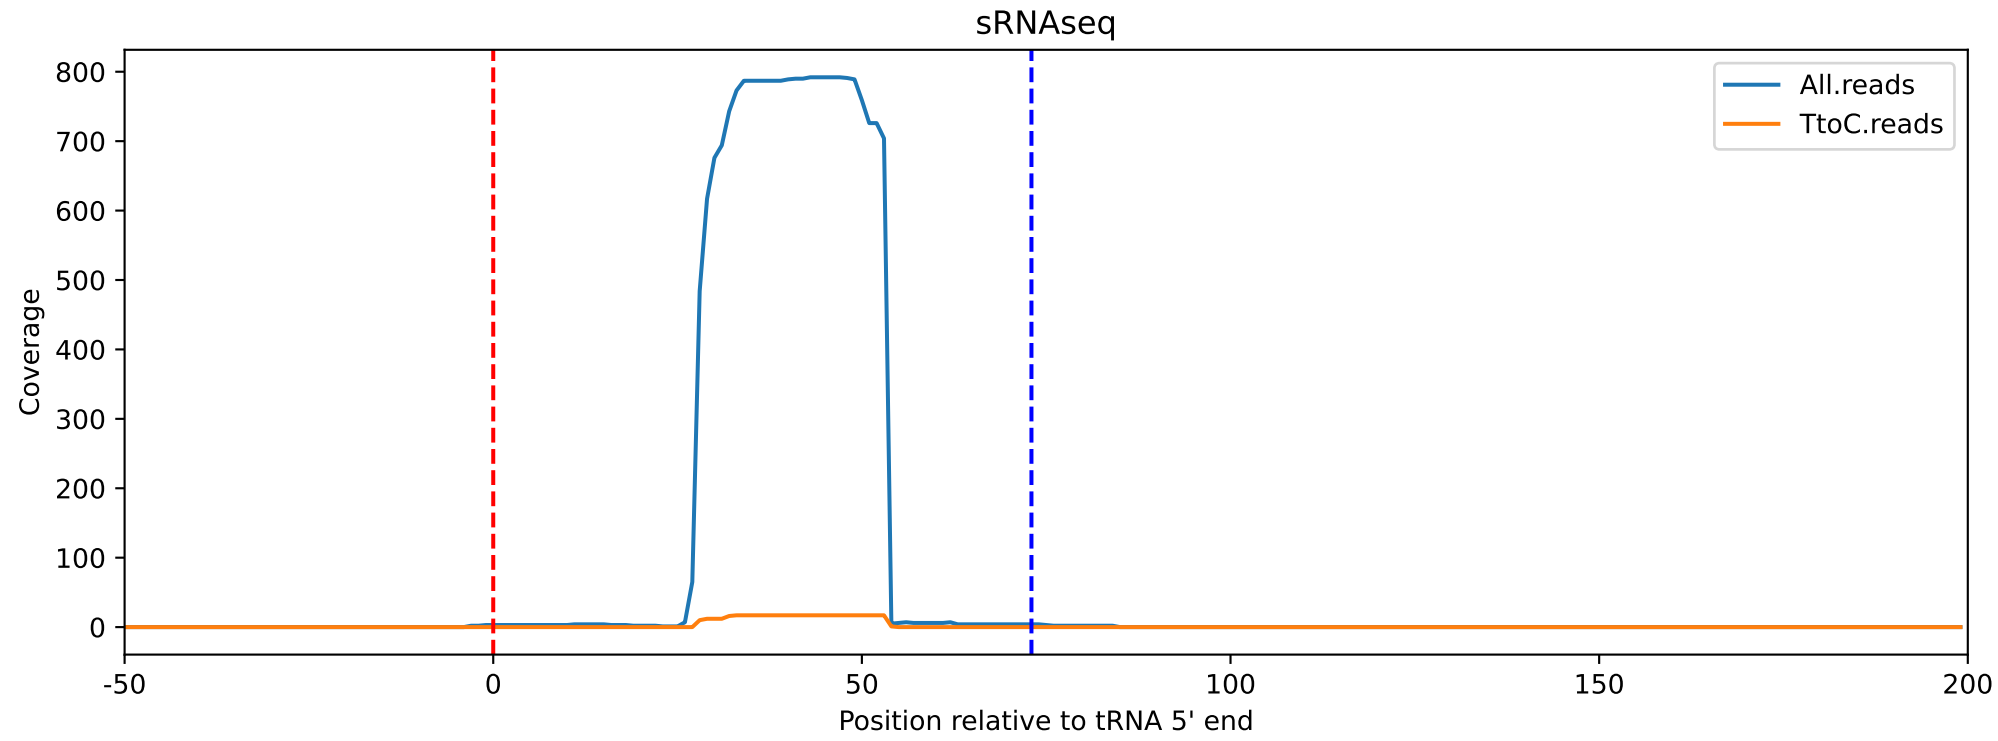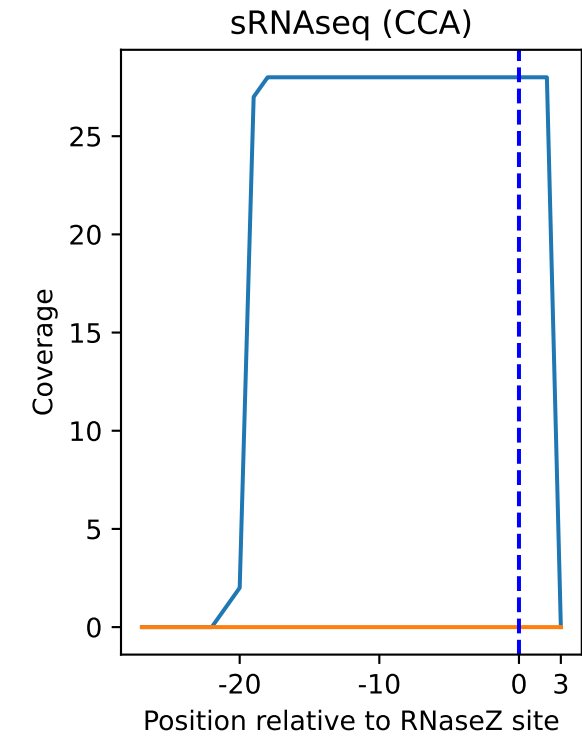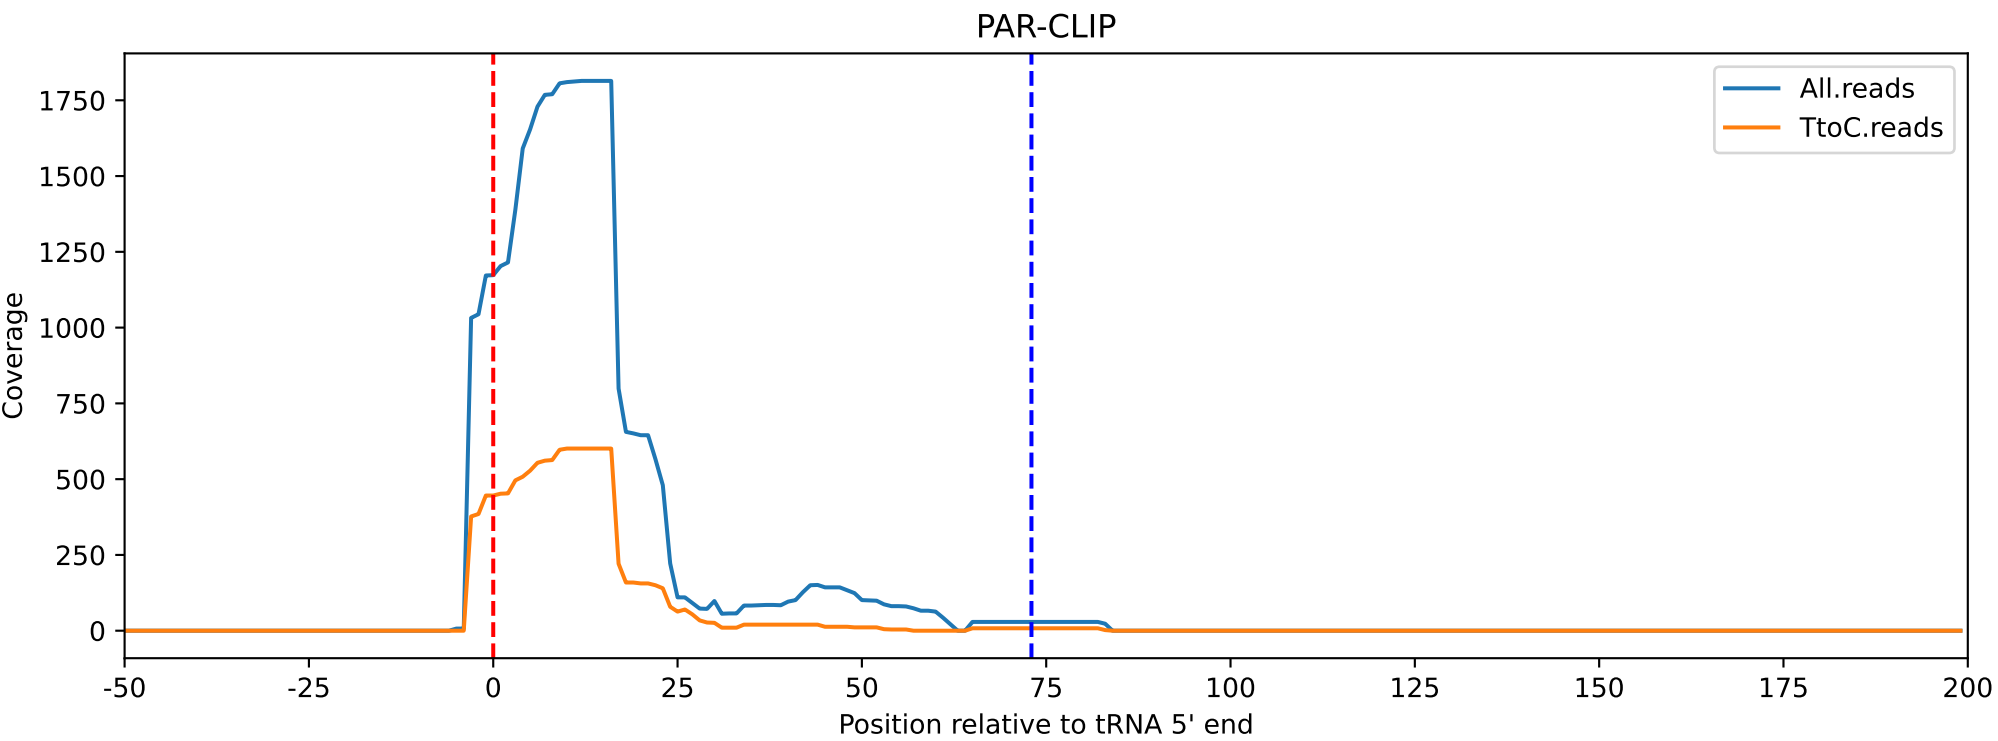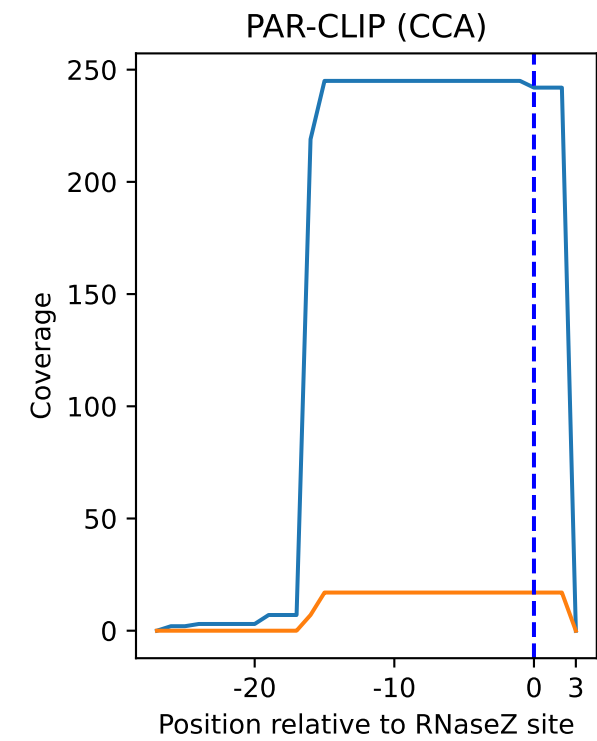

# tRNA-Phe-GAA-1-8

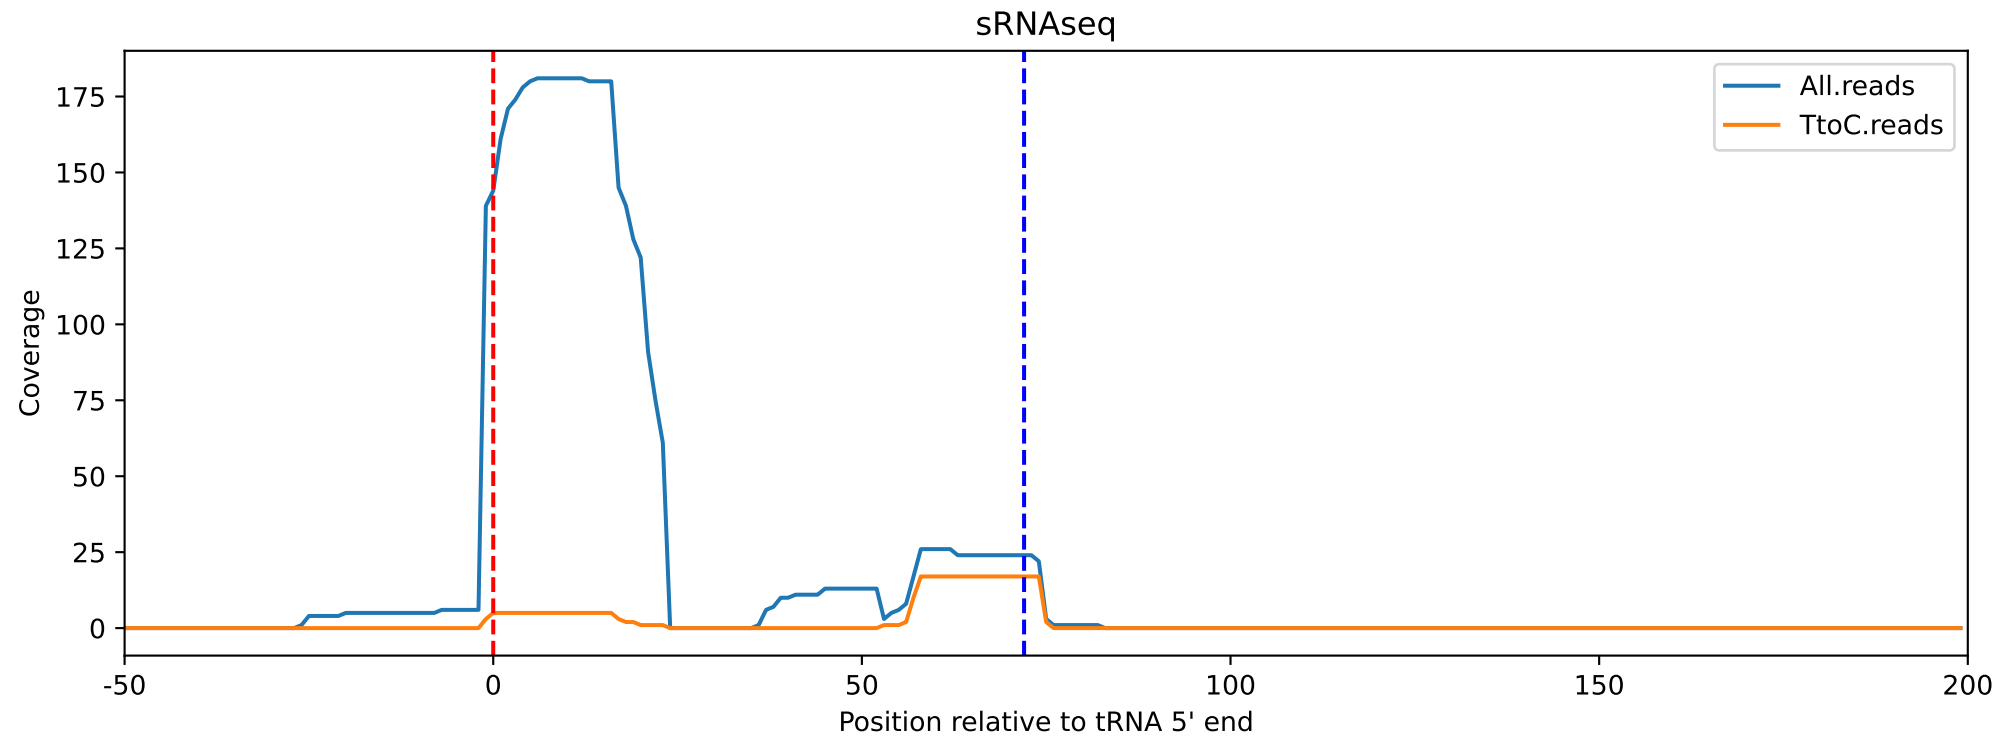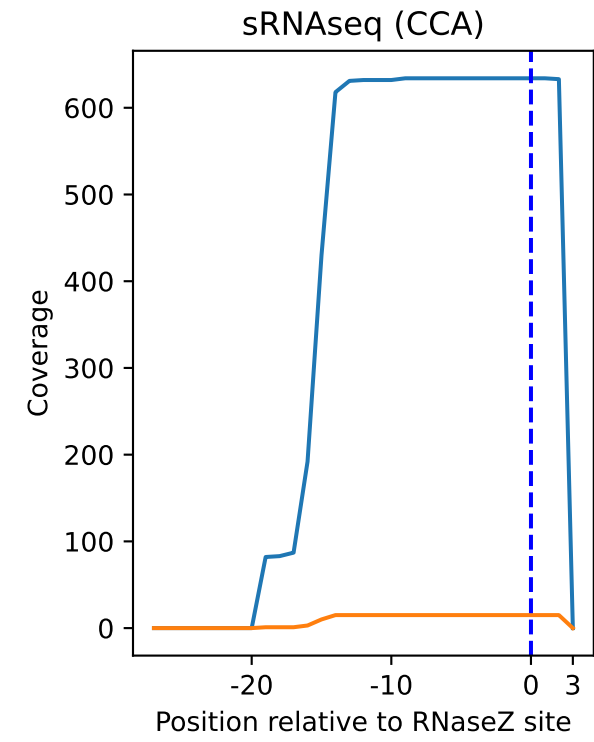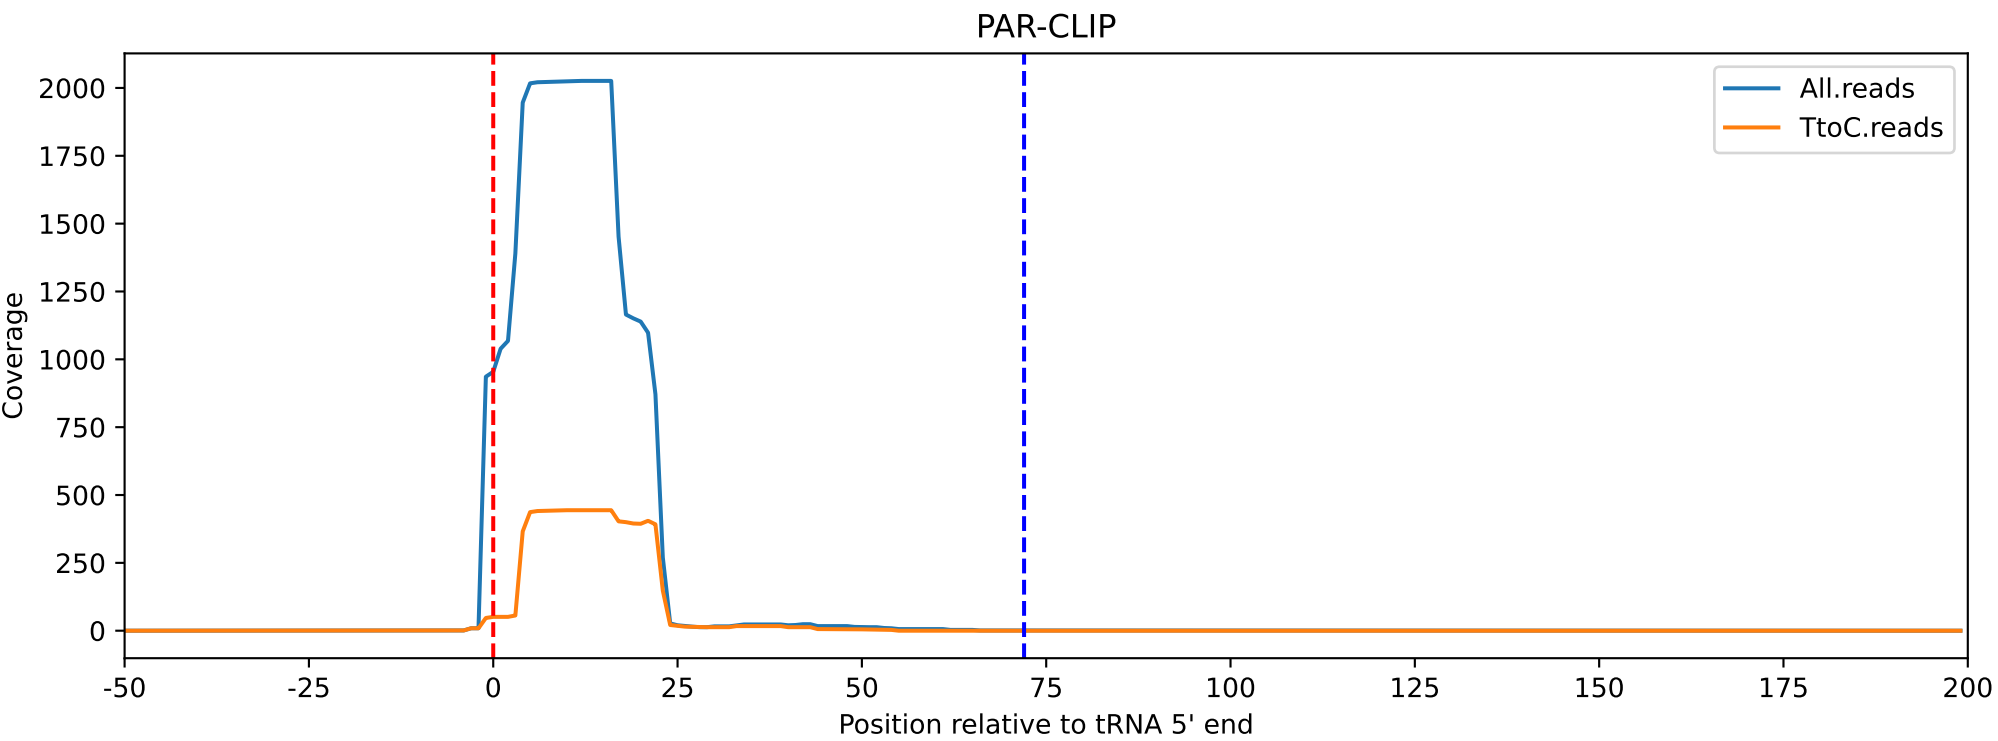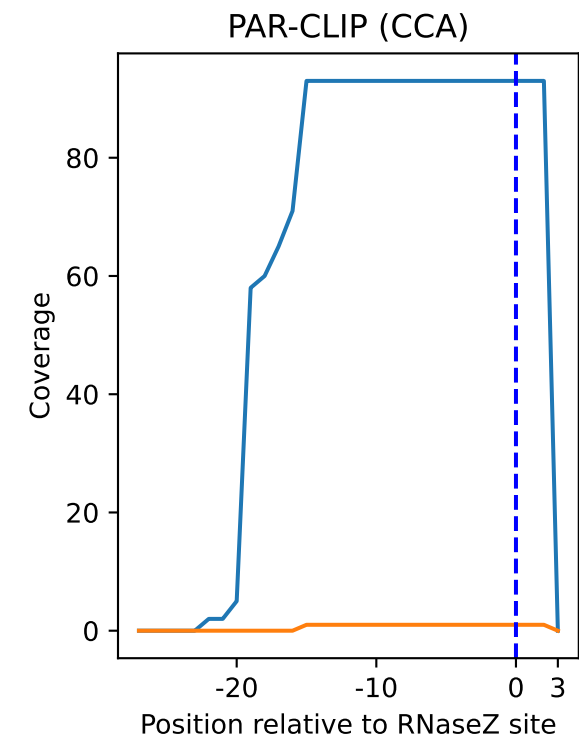

# tRNA-Asn-GTT-1-10

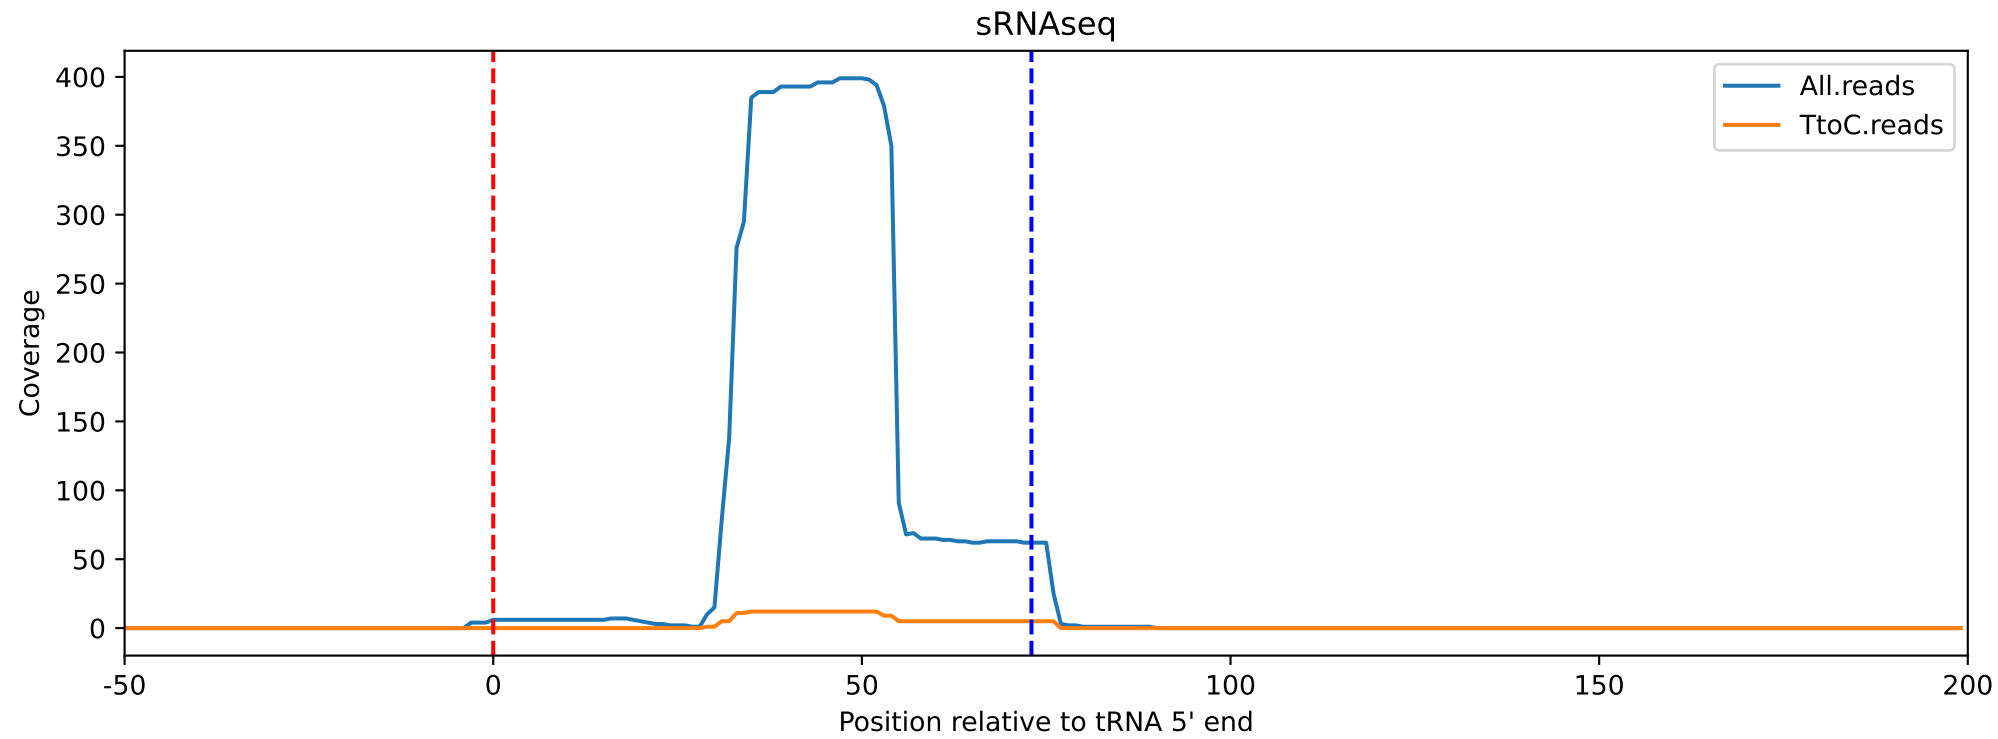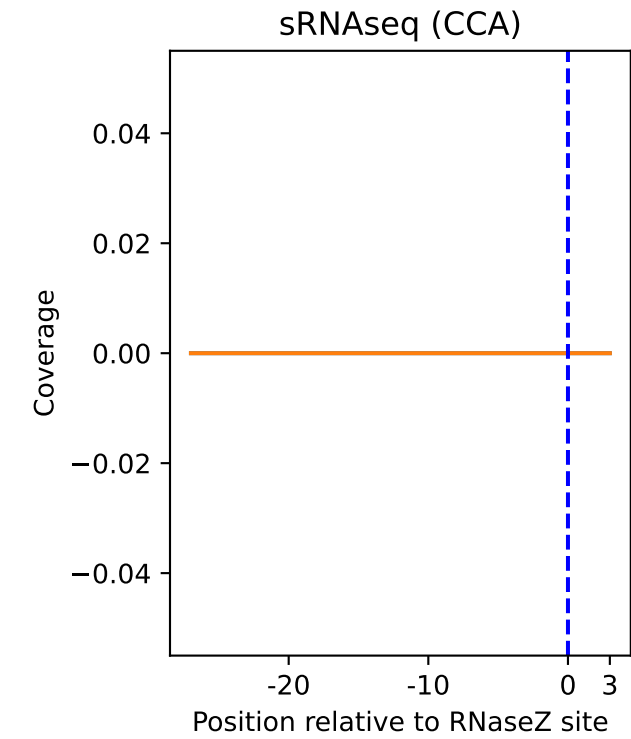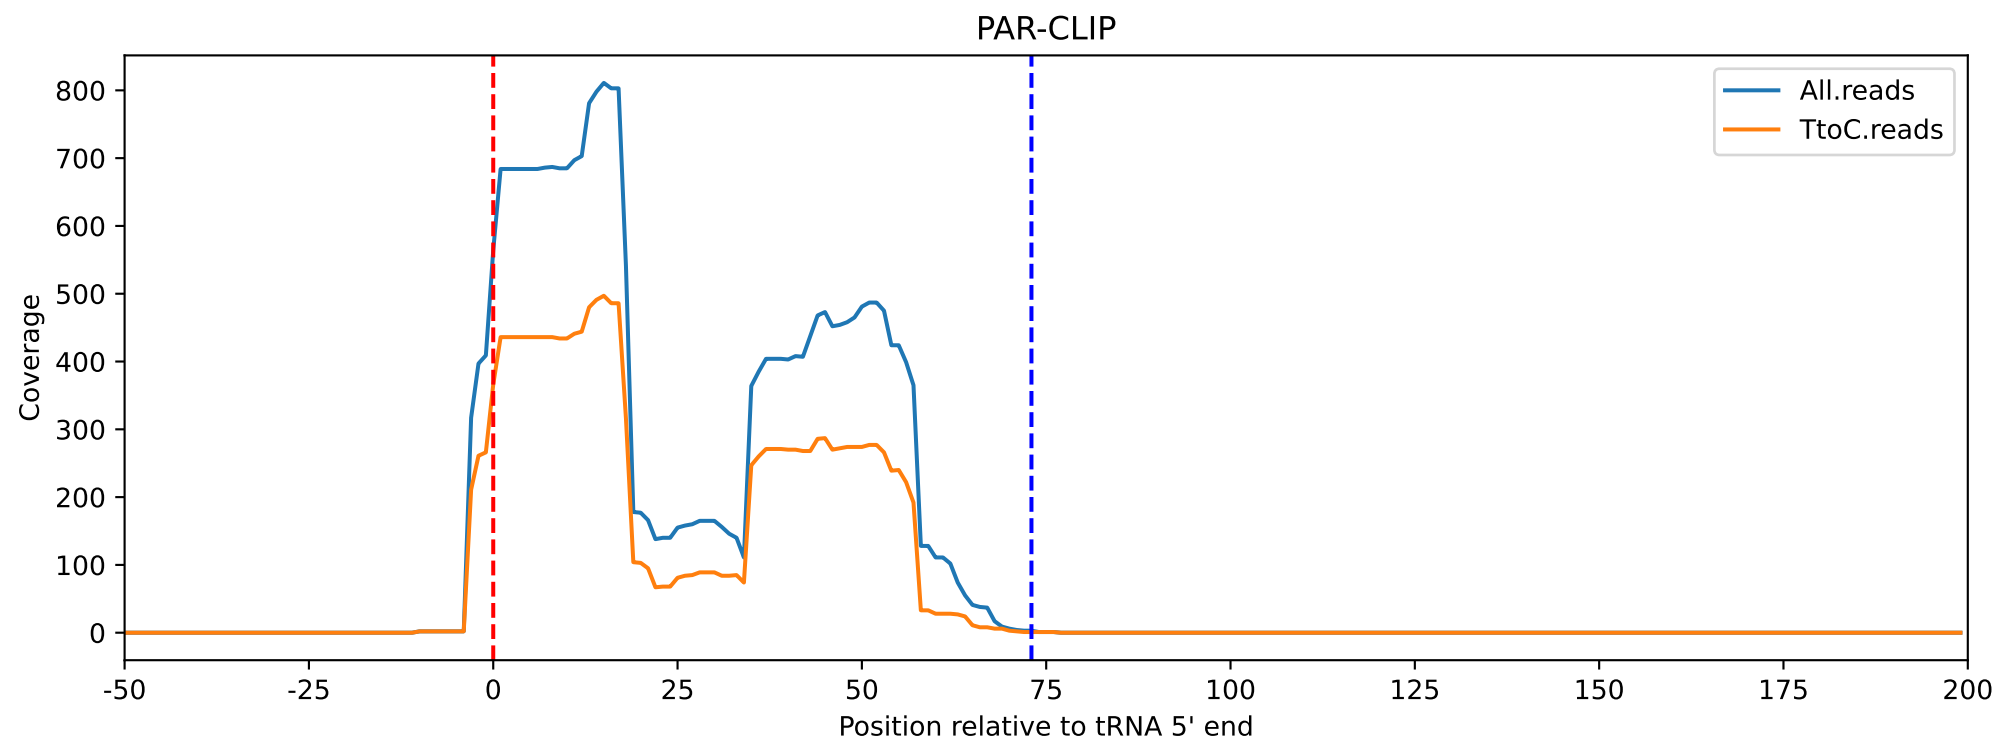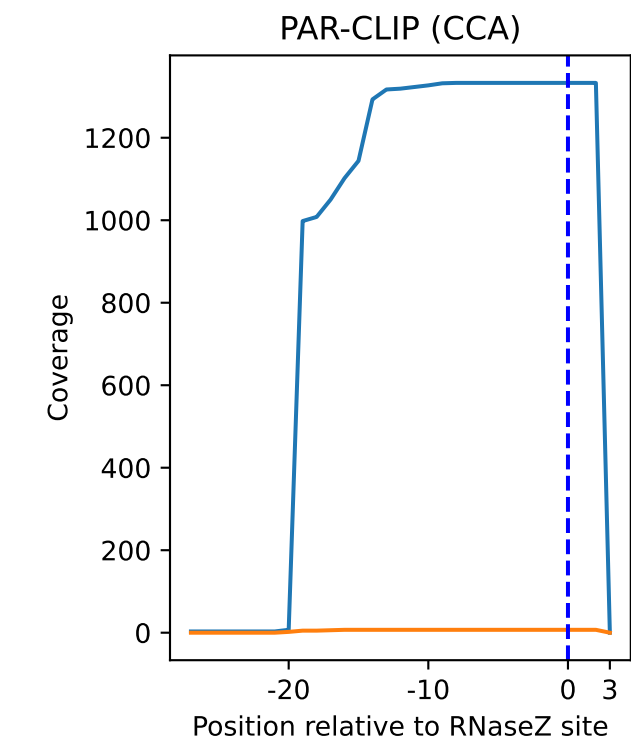

# tRNA-Cys-GCA-1-3

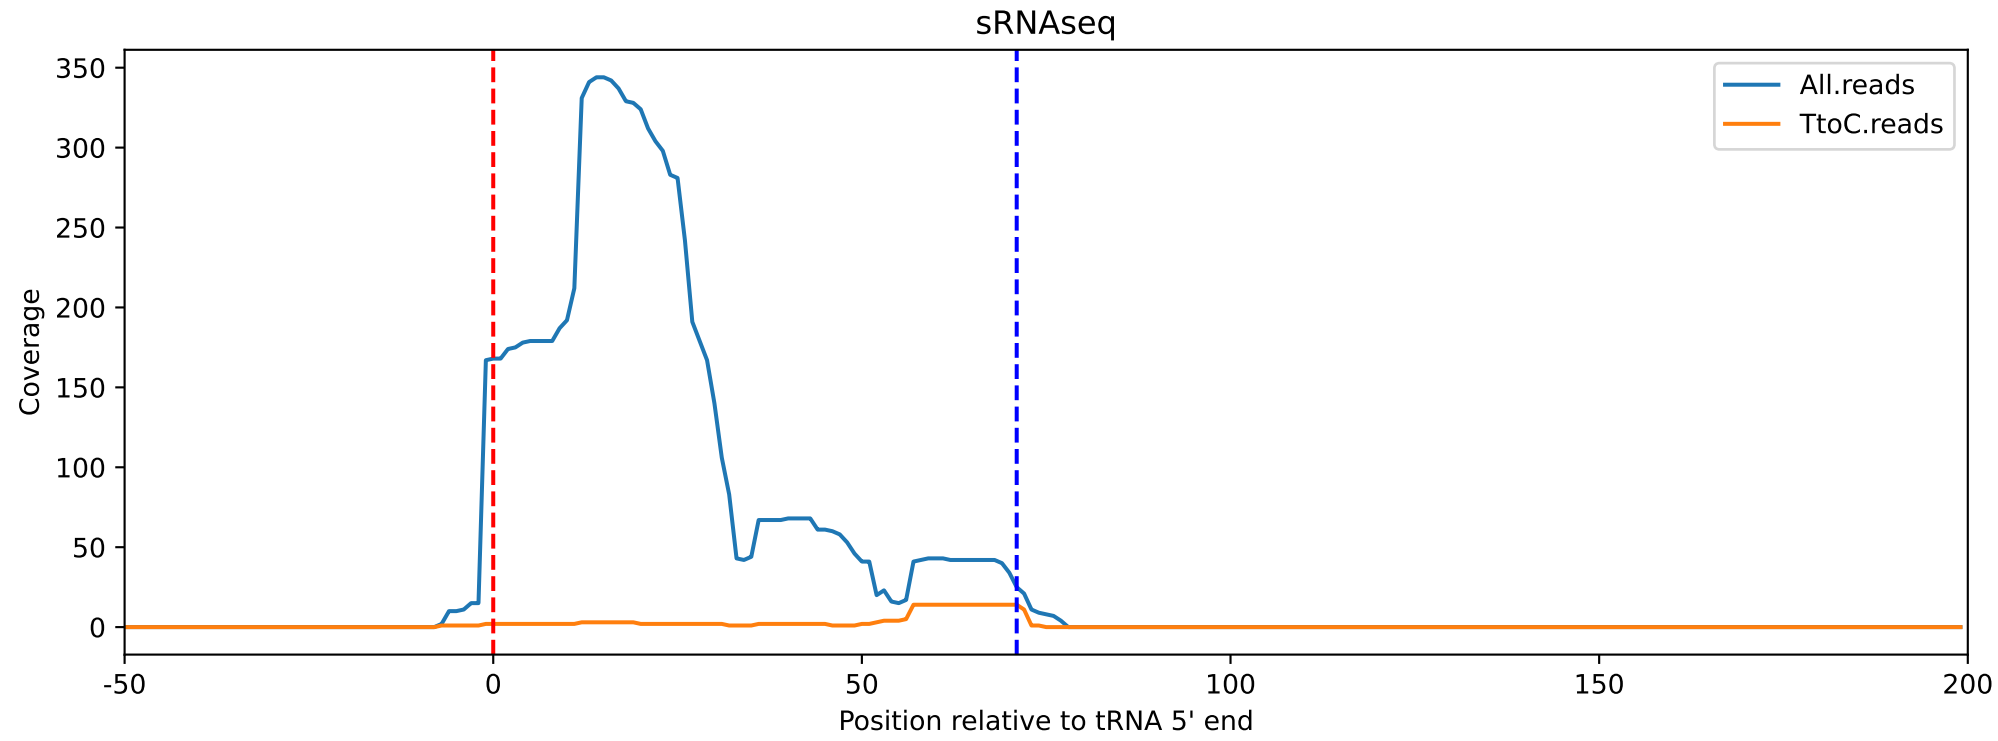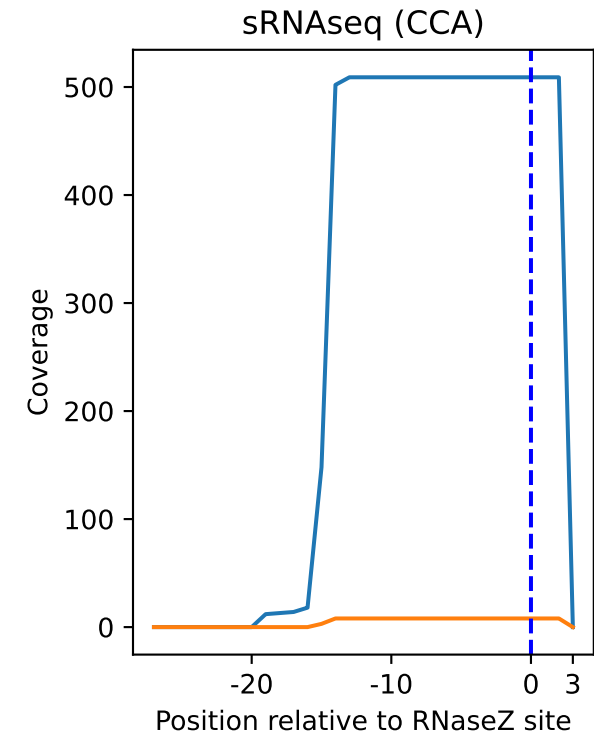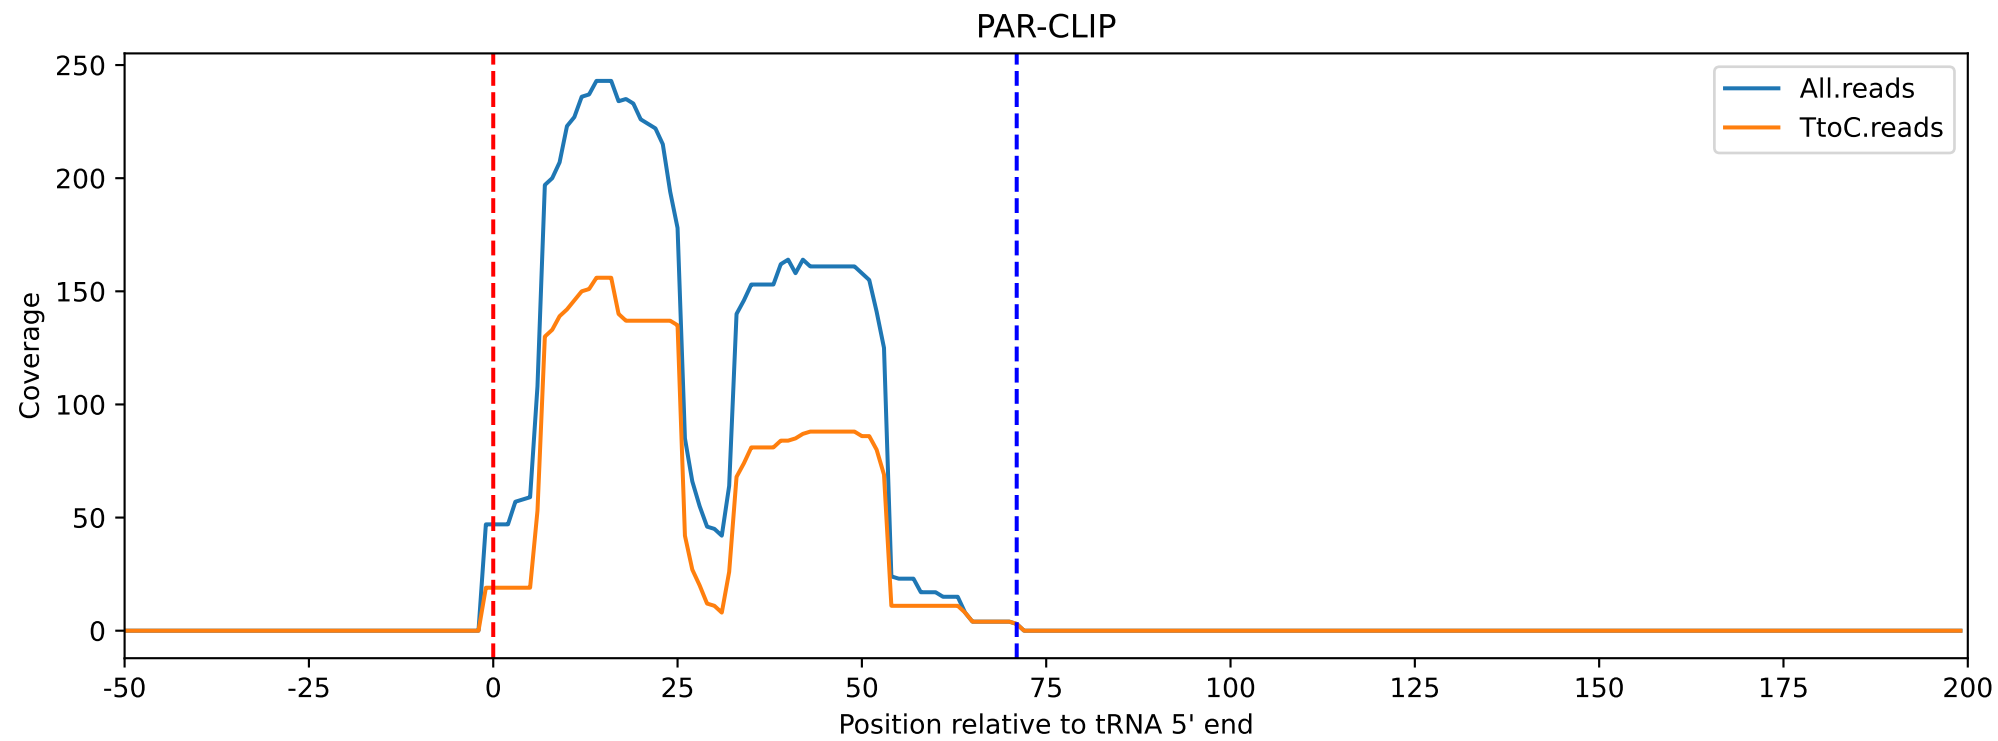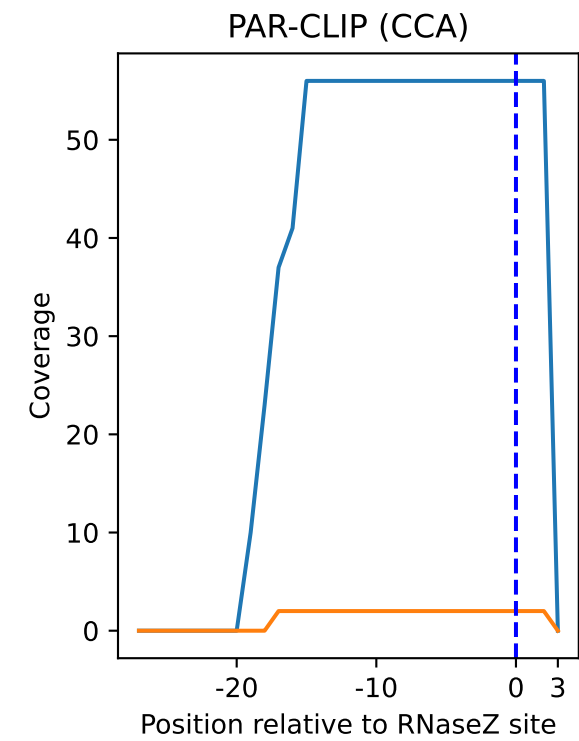

# tRNA-Pro-TGG-1-5

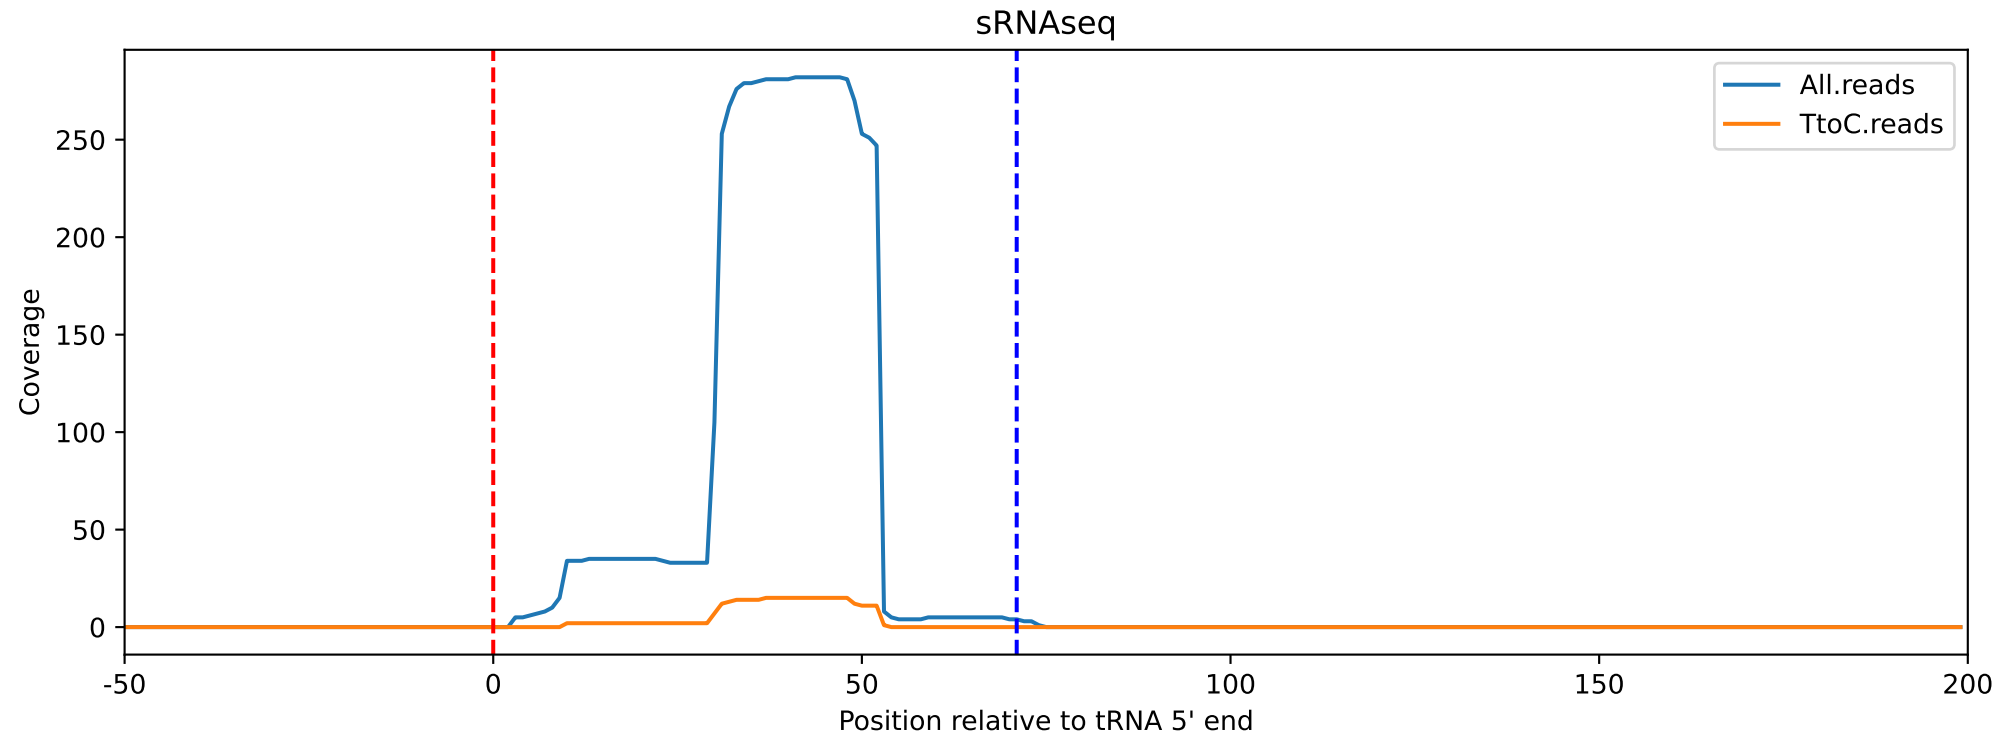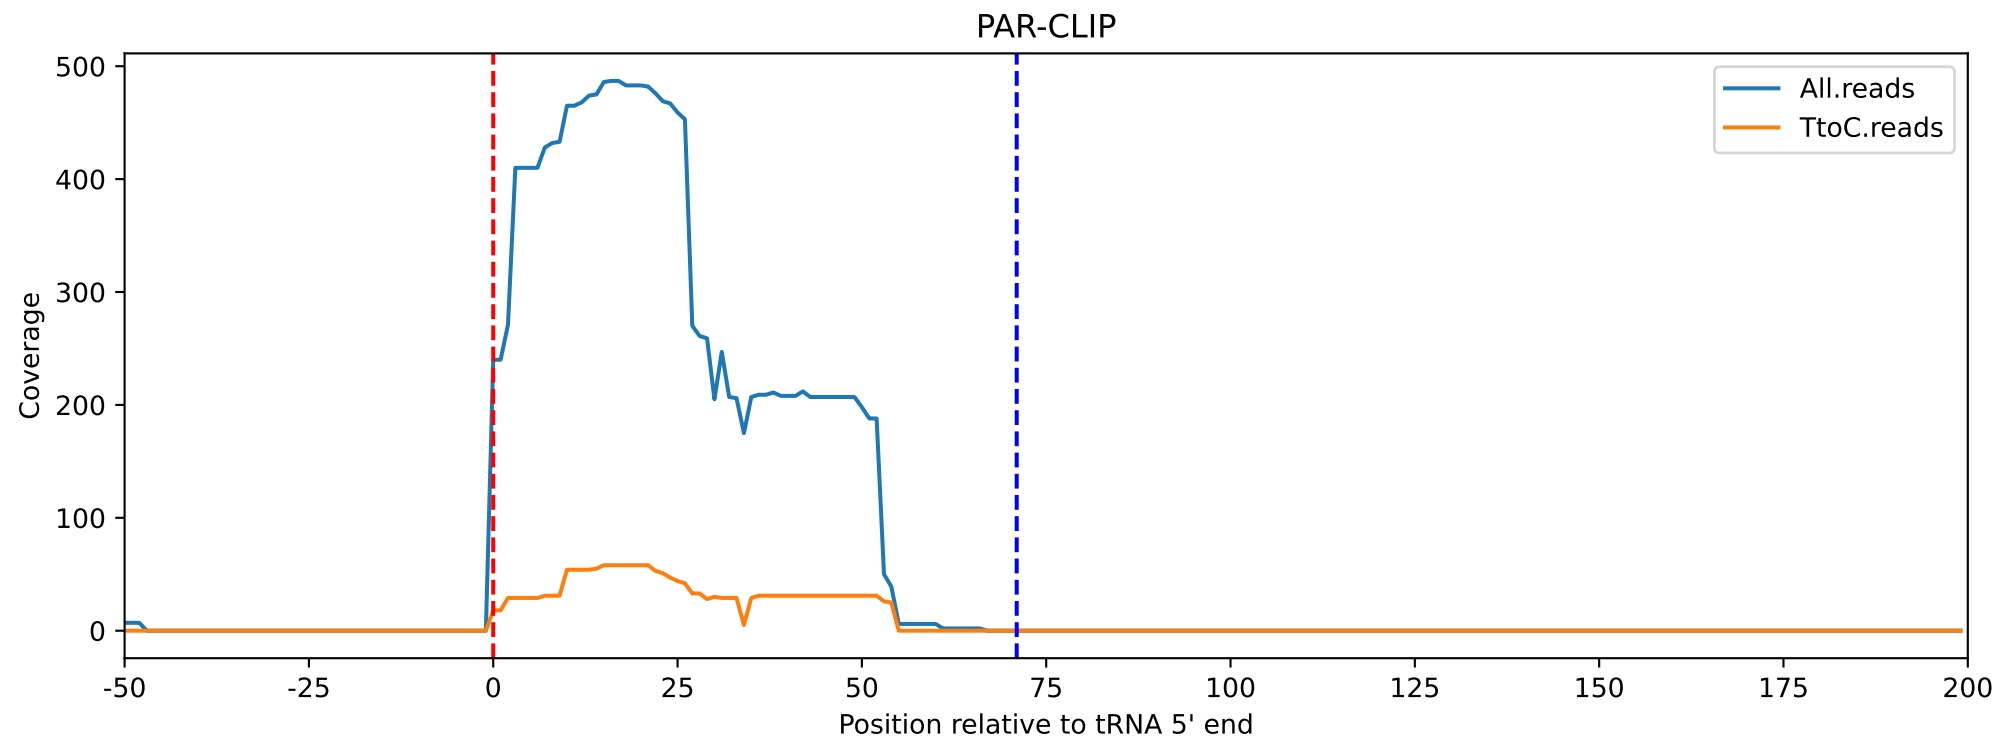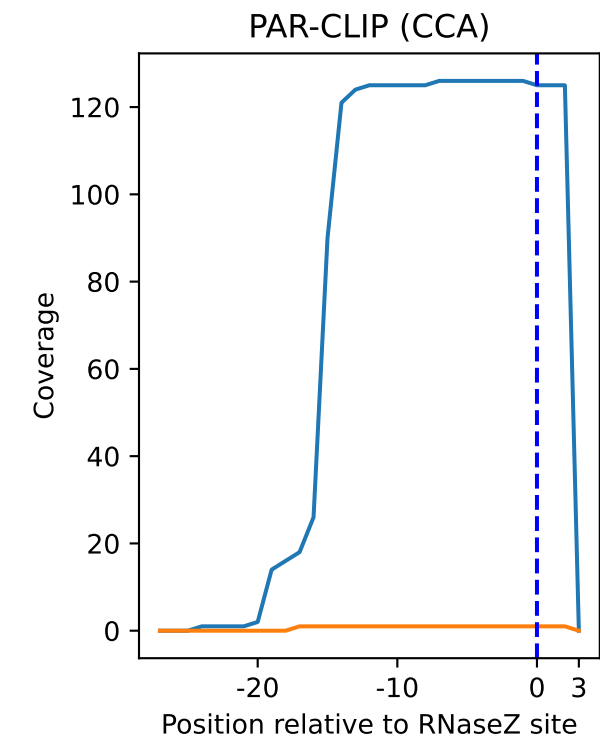

# tRNA-Gln-CTG-2-1

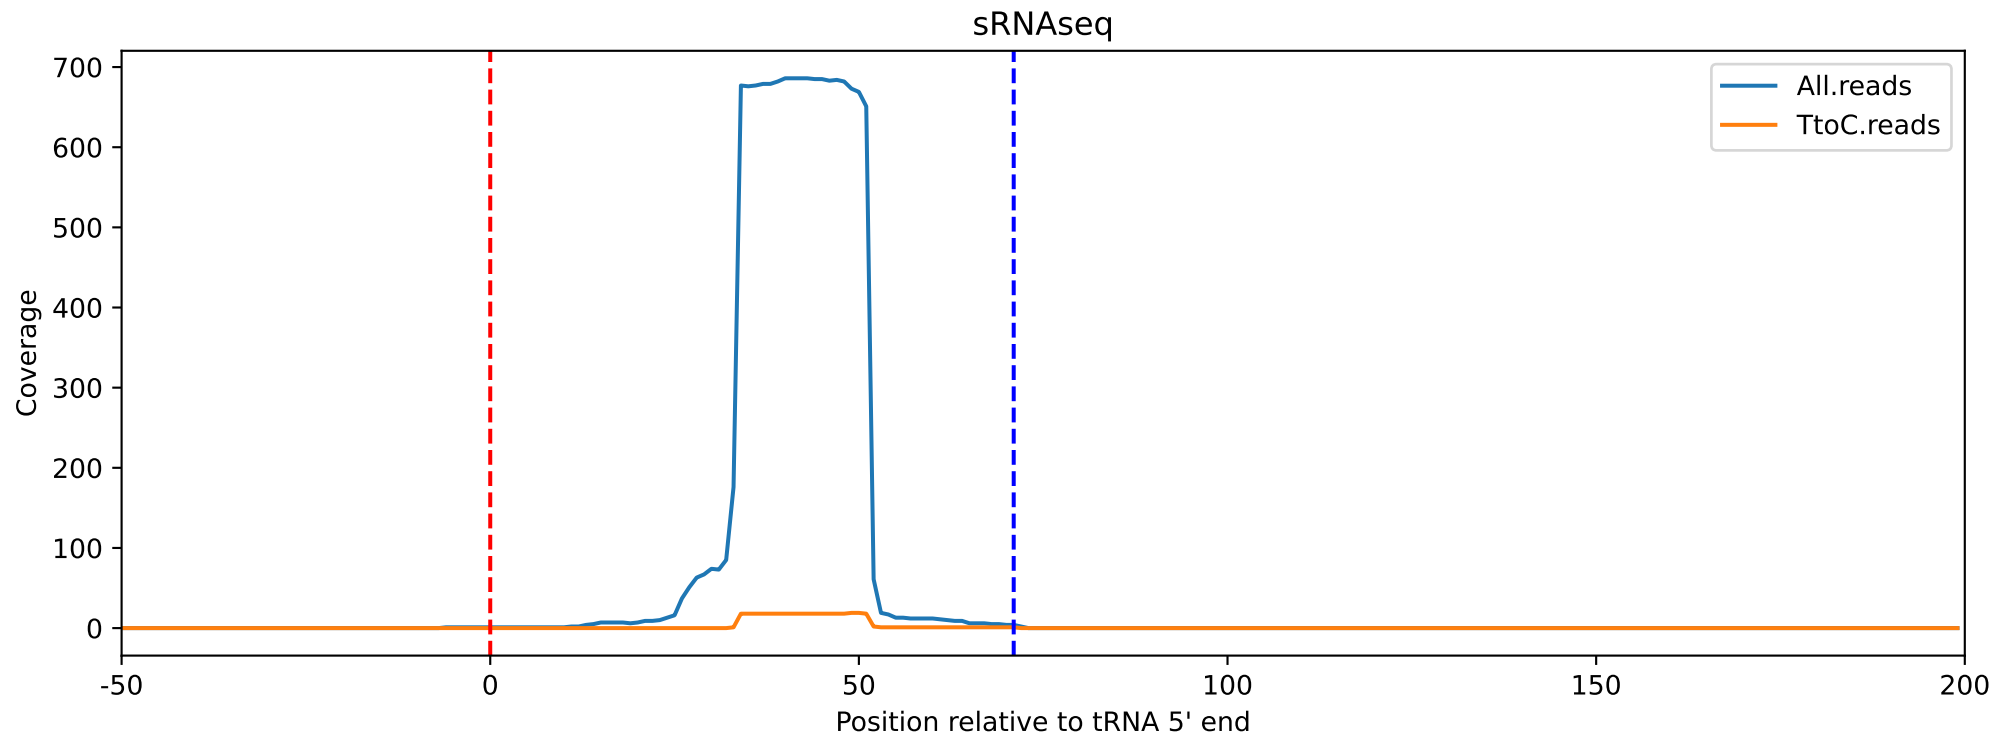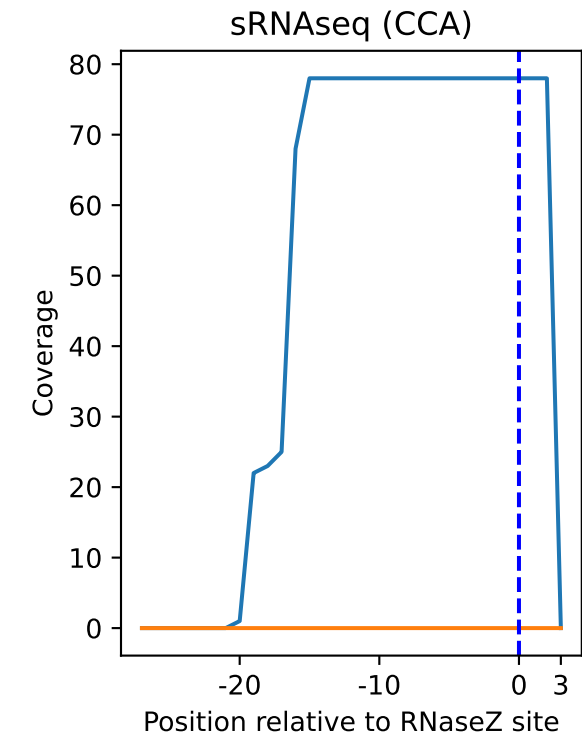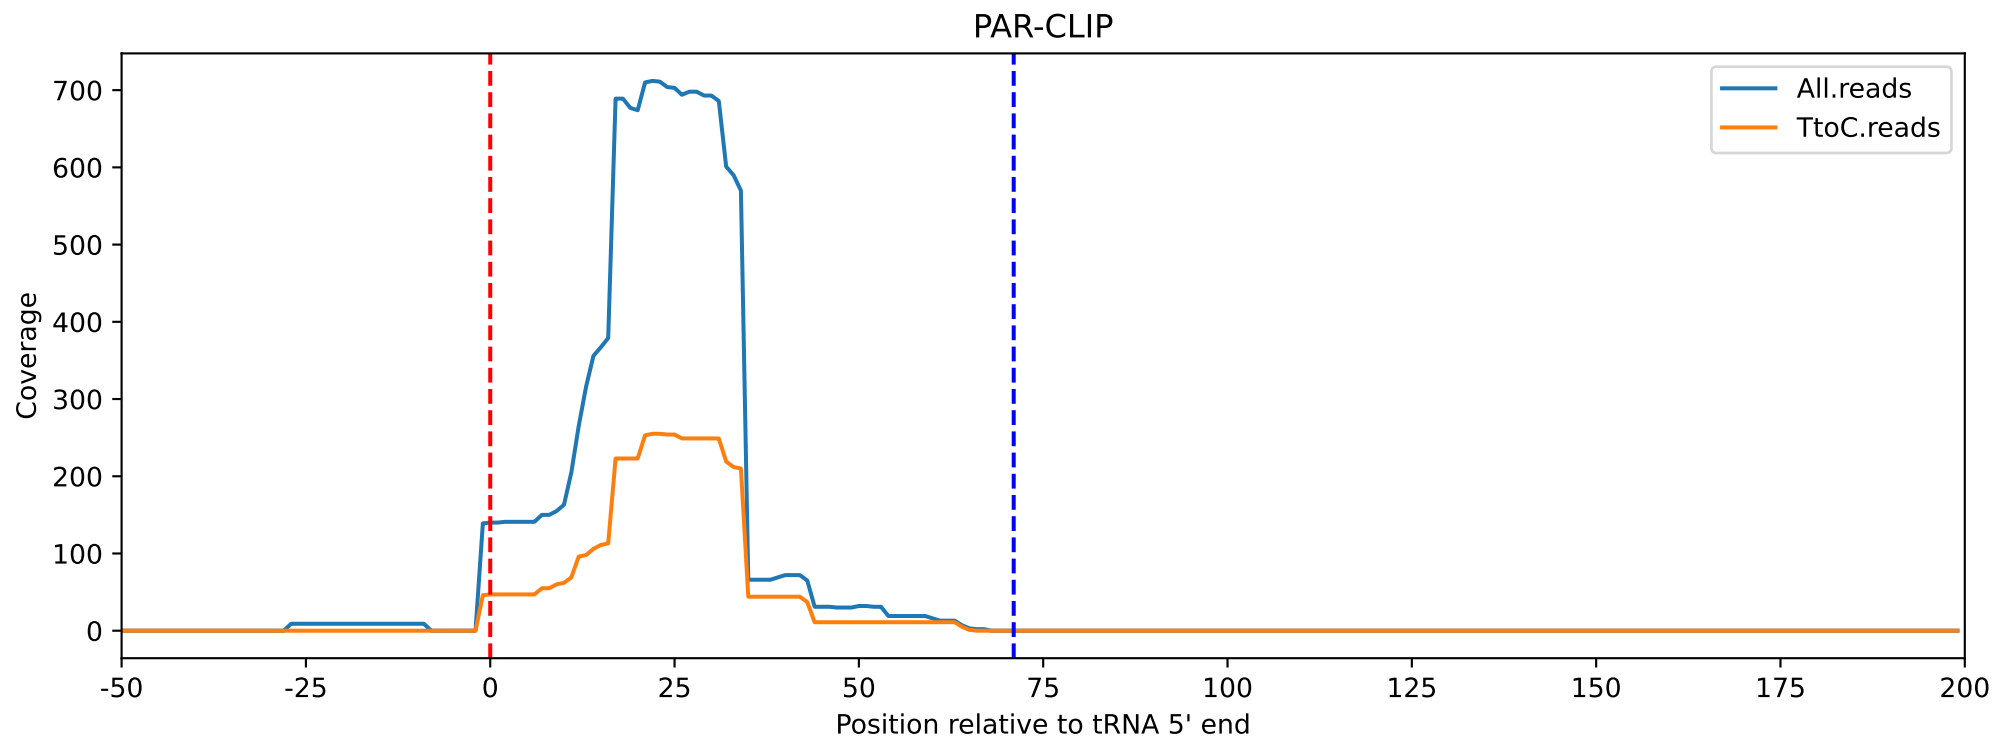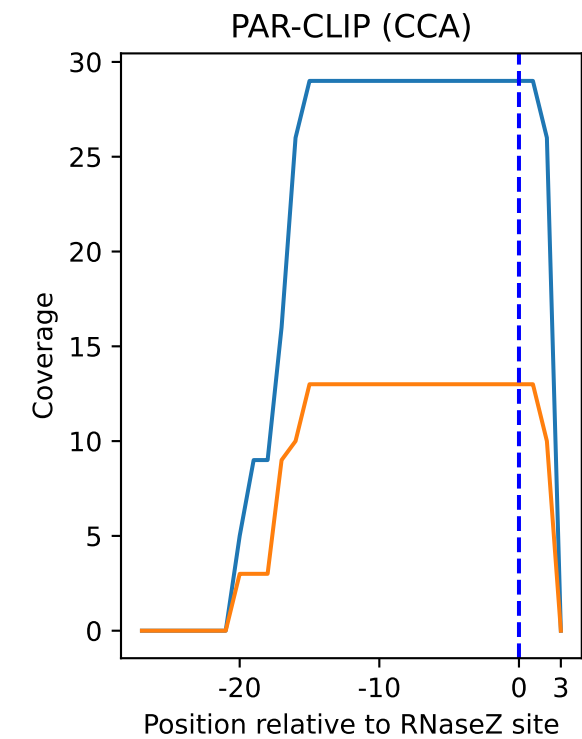

# tRNA-Met-CAT-1-1

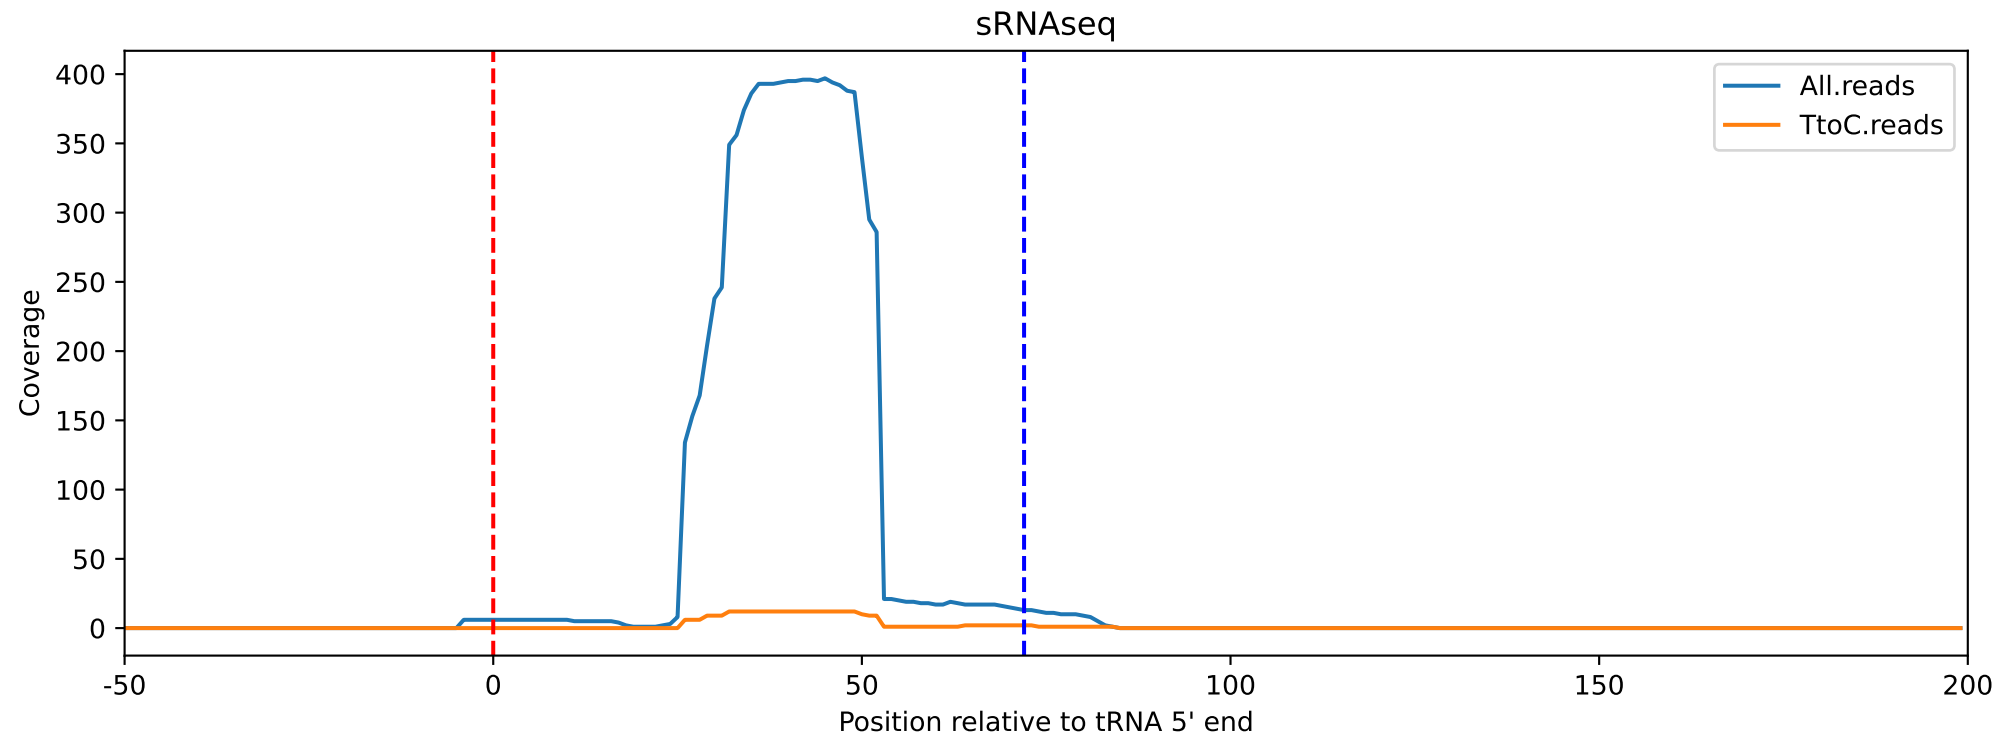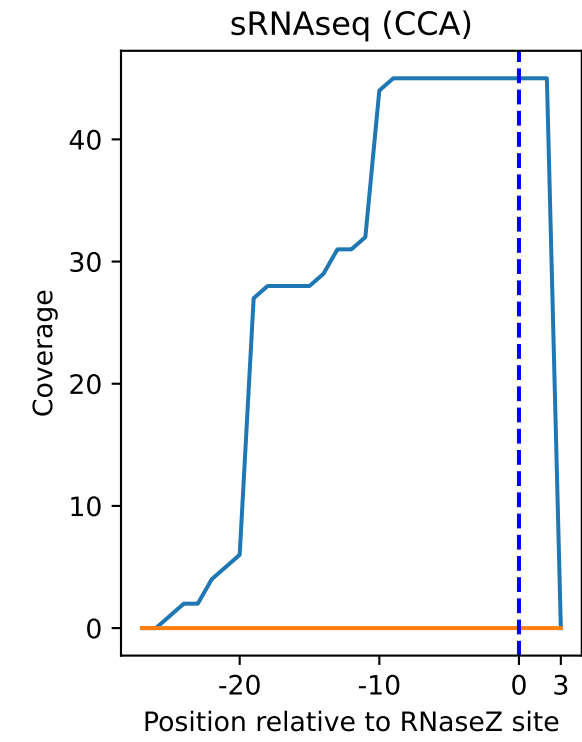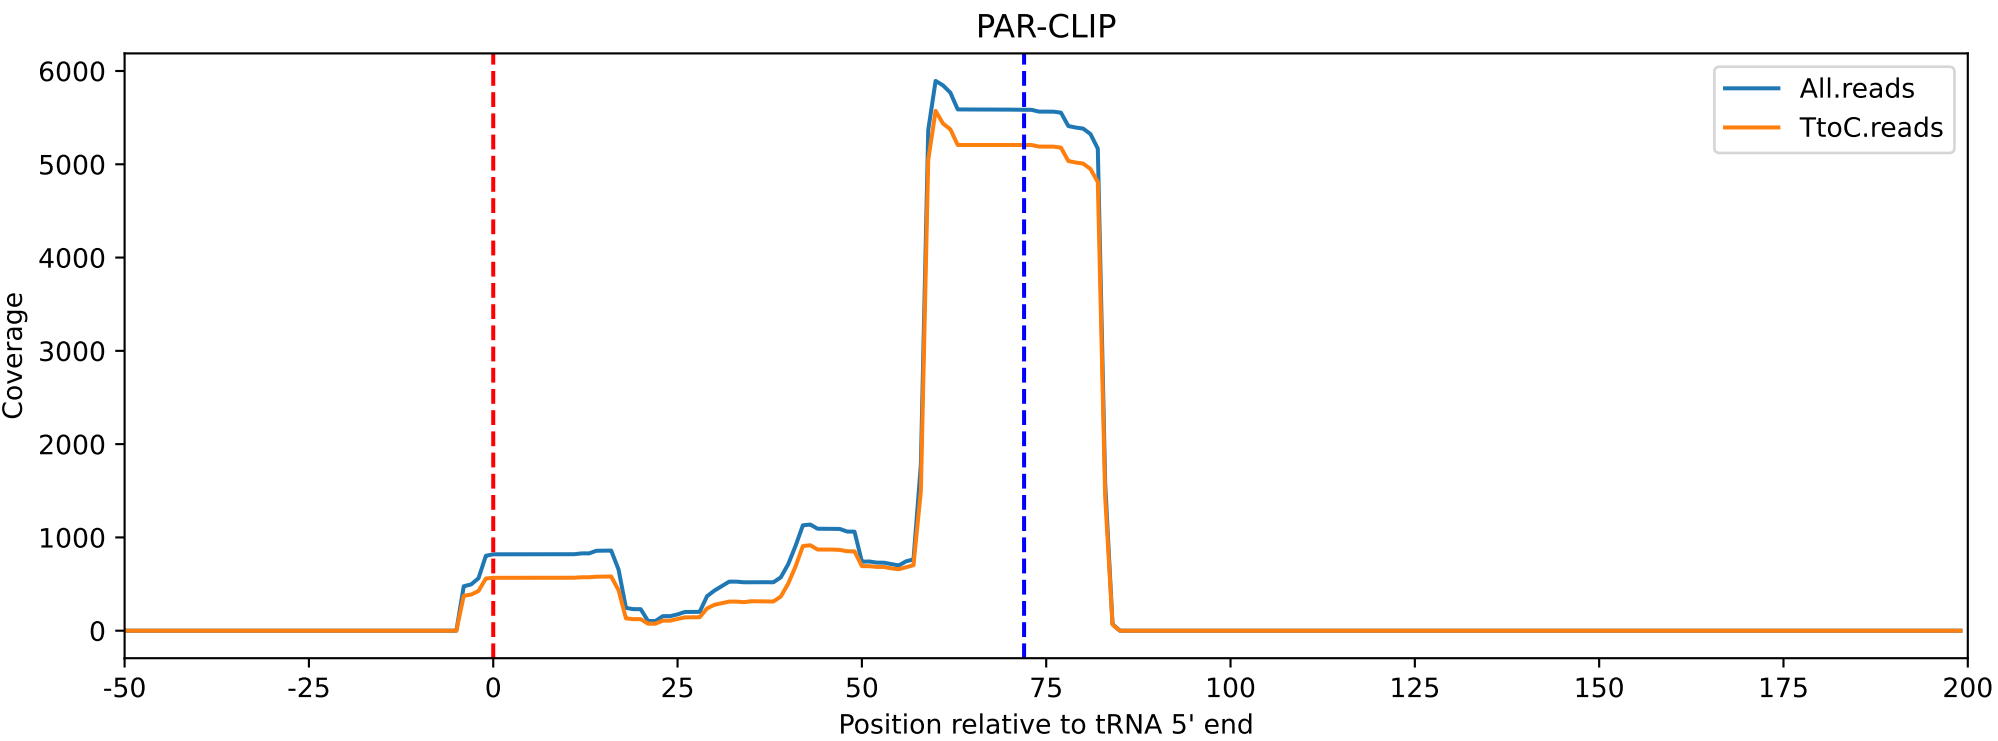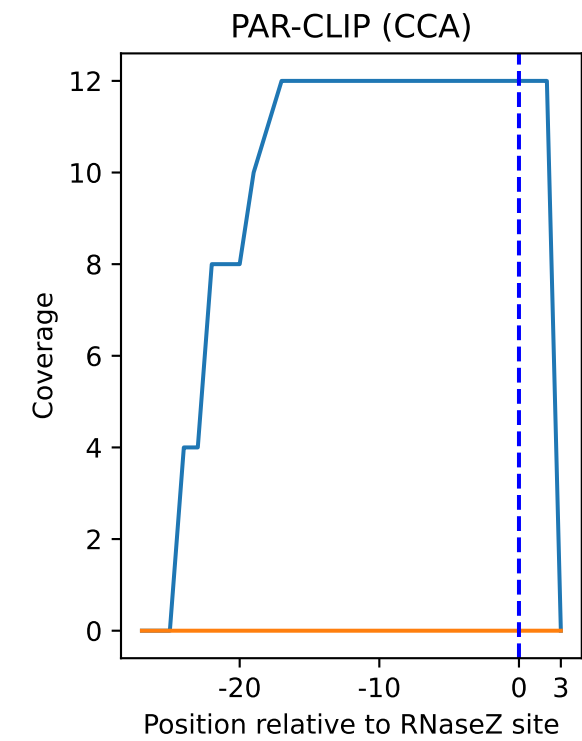

# tRNA-Gly-GCC-1-13

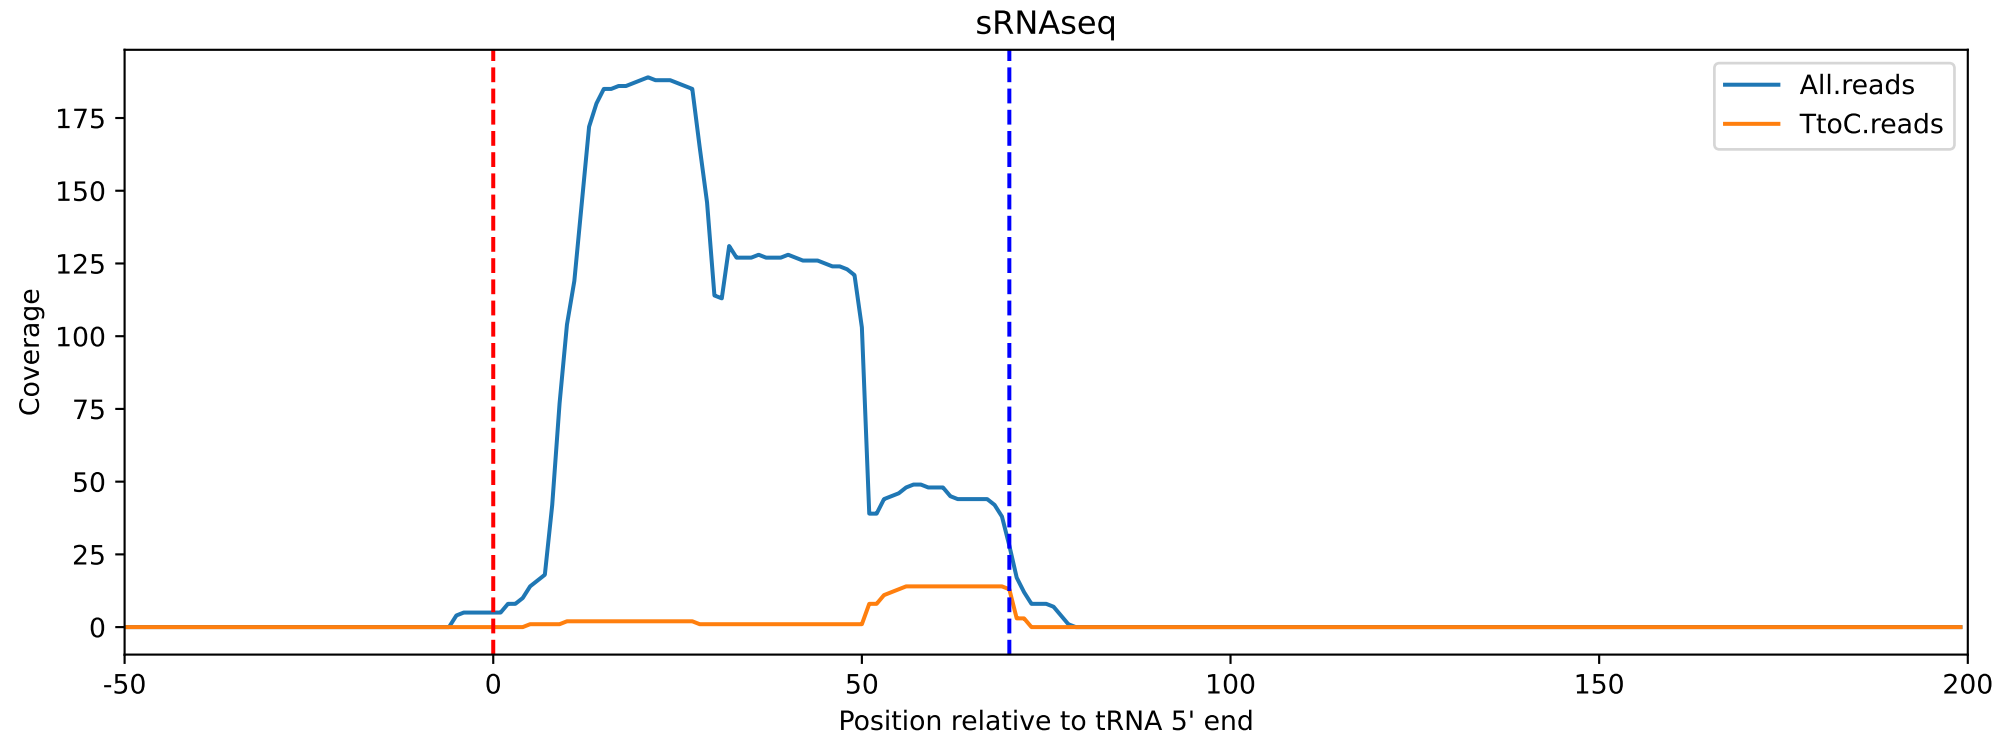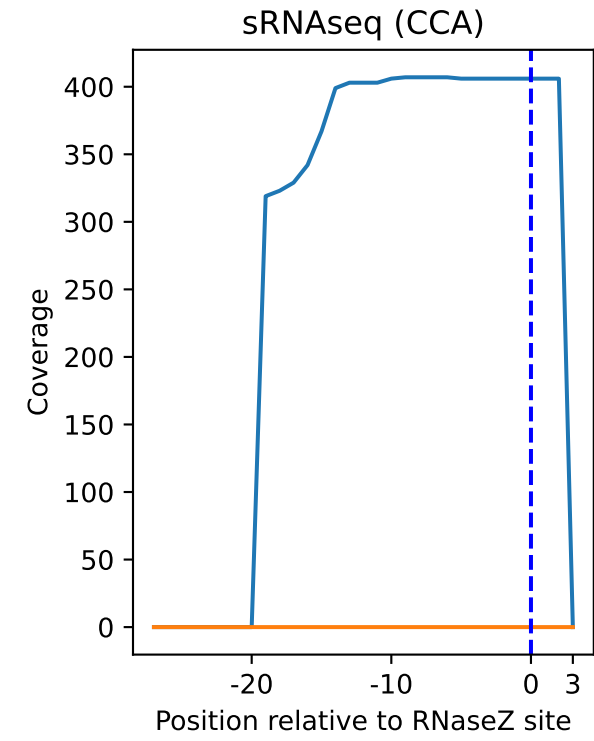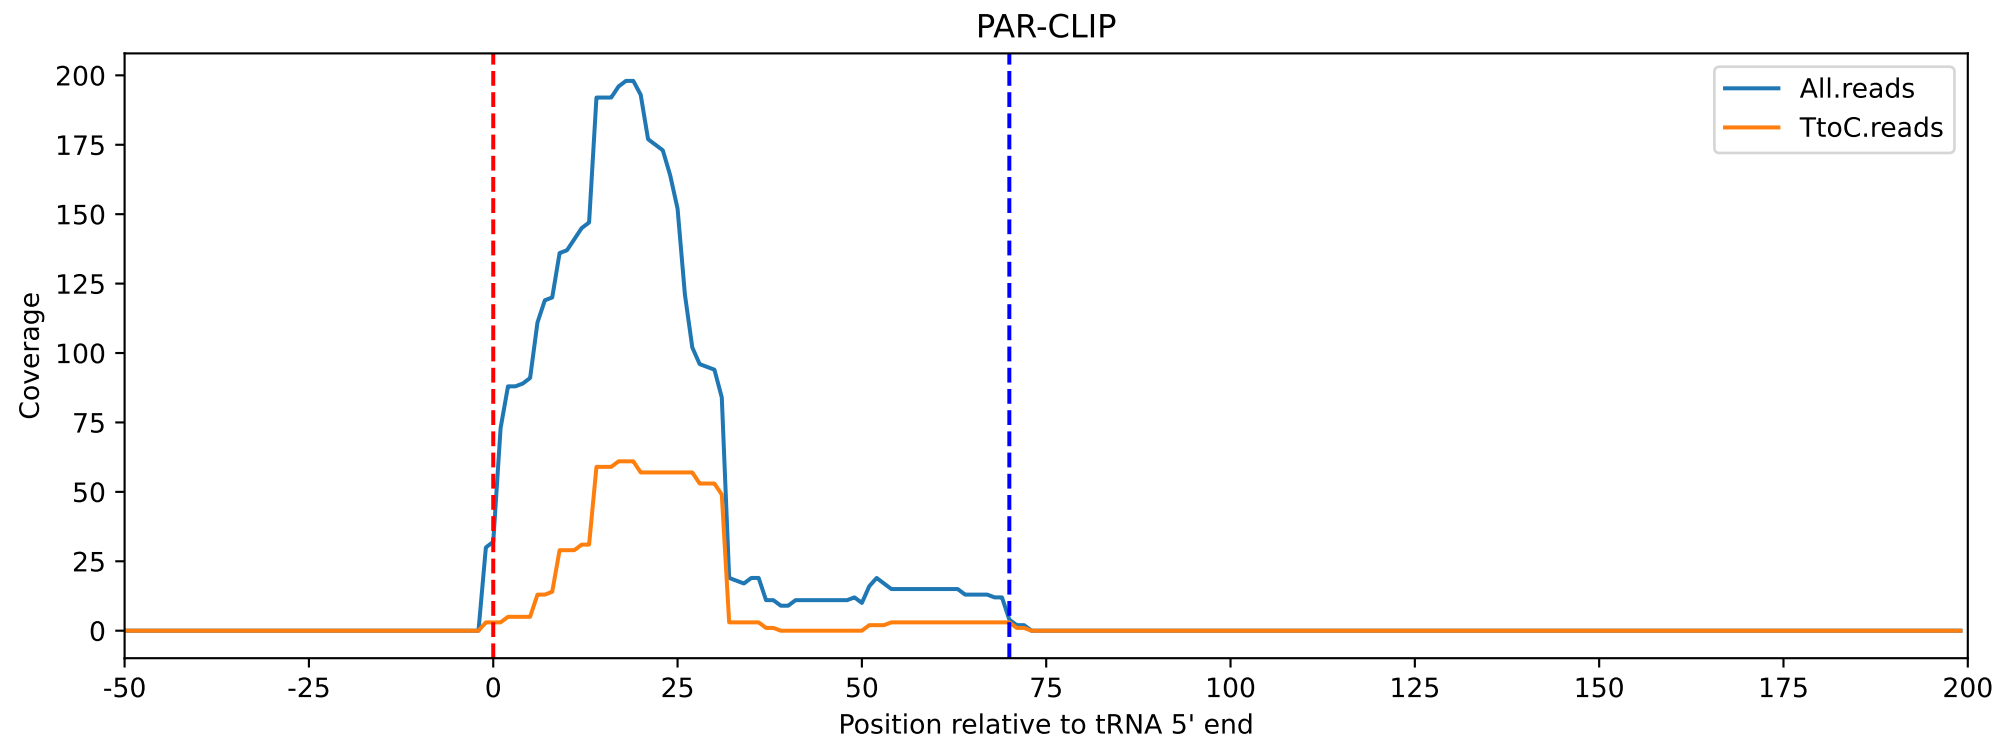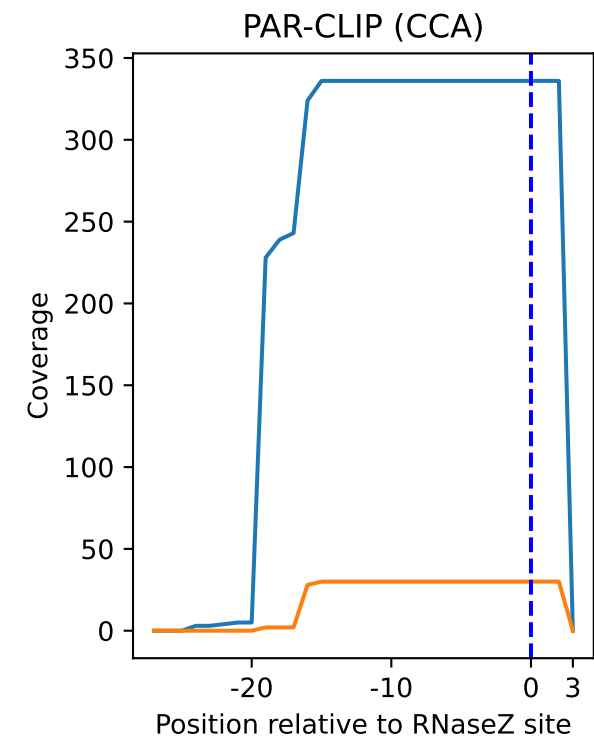



# tRNA-Glu-TTC-1-5

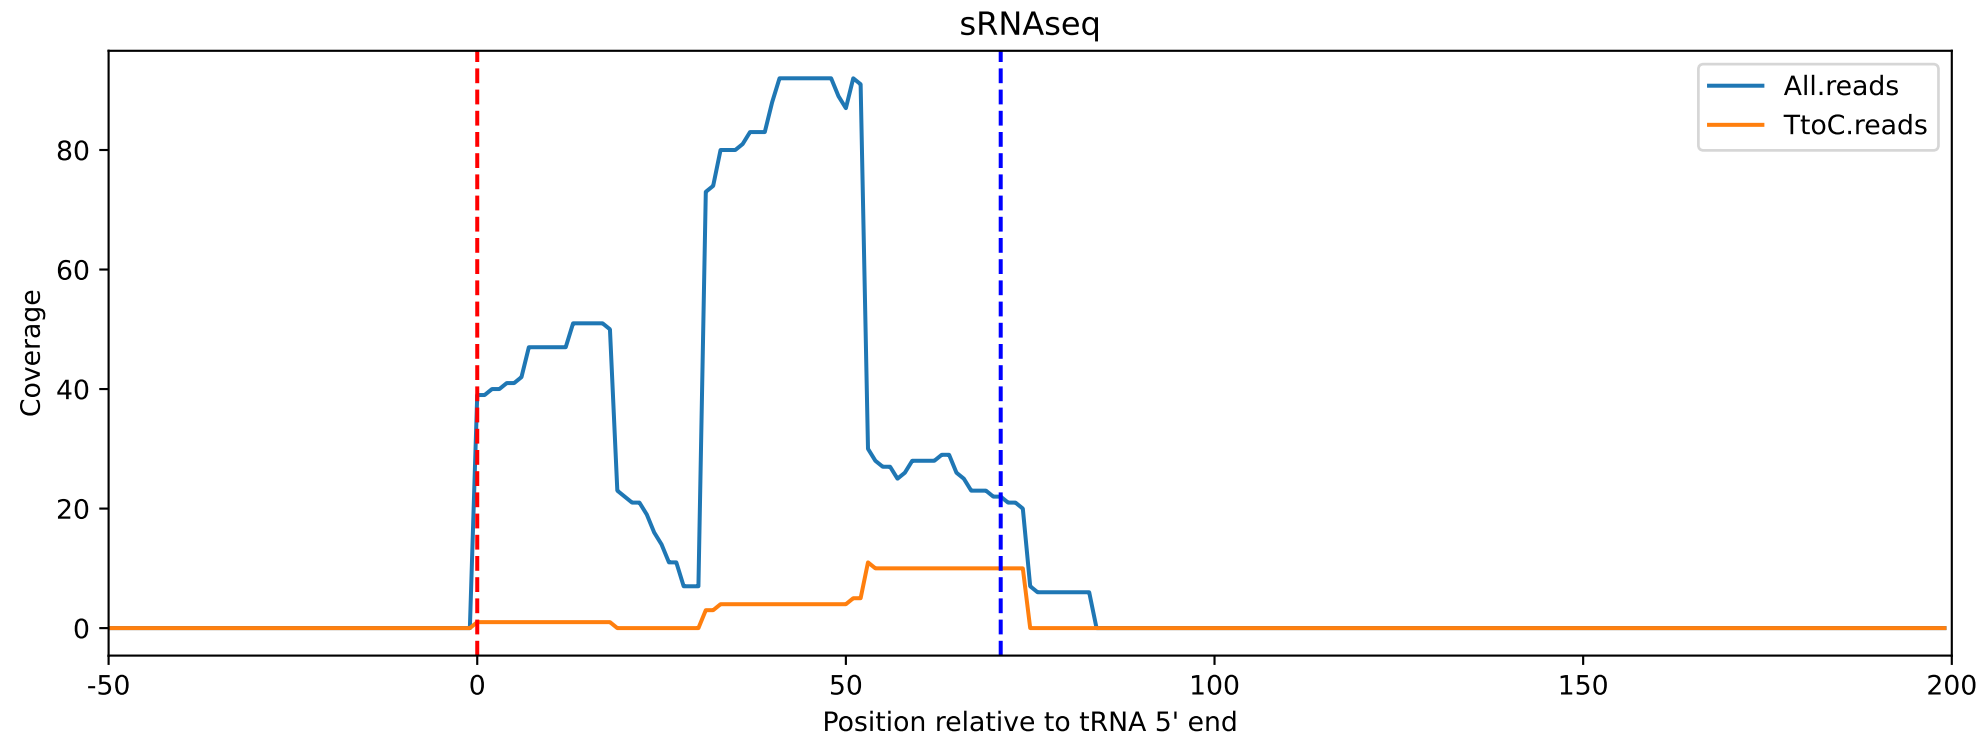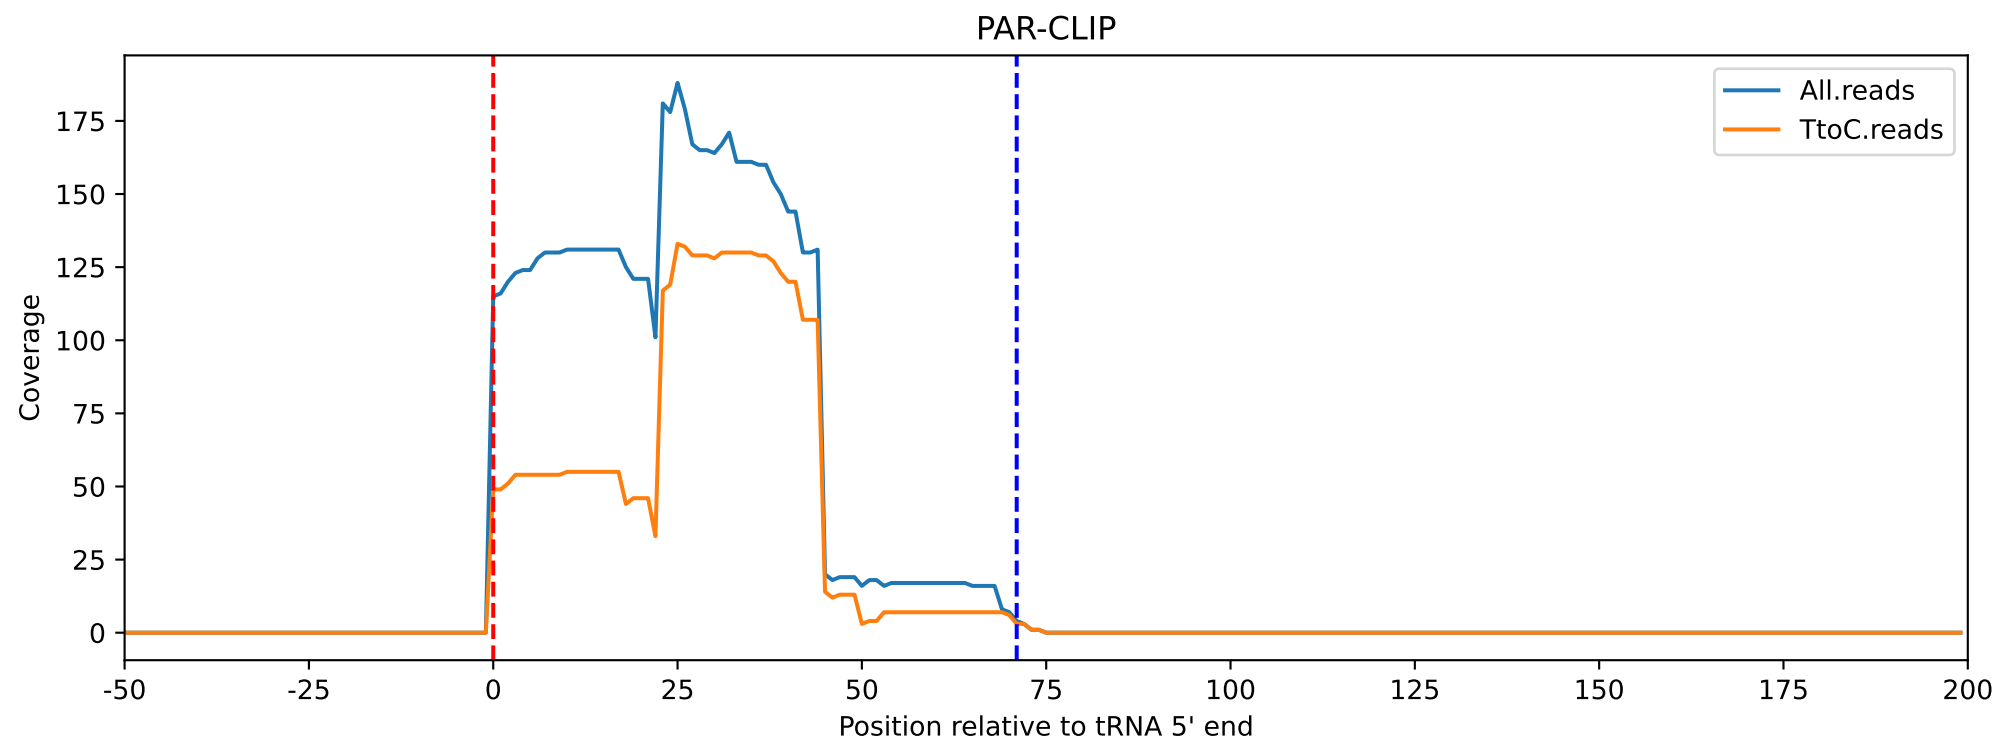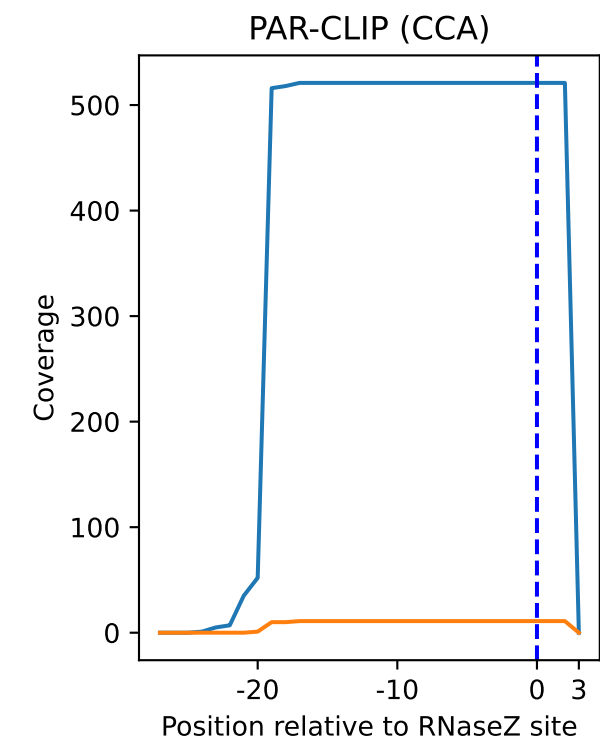

# tRNA-Glu-TTC-1-2

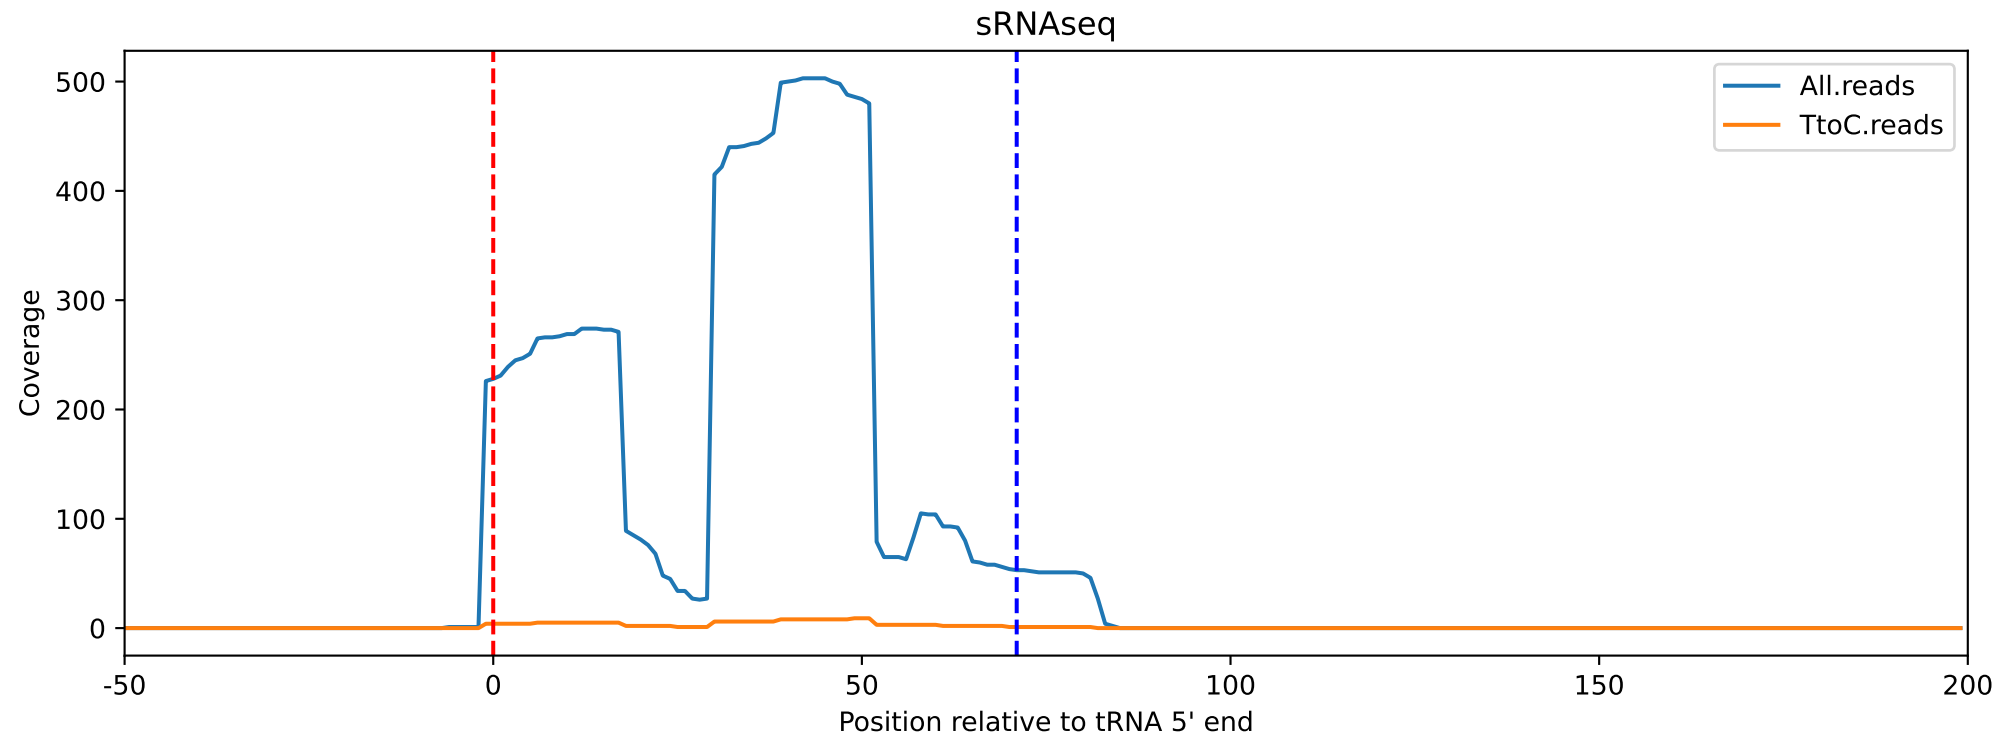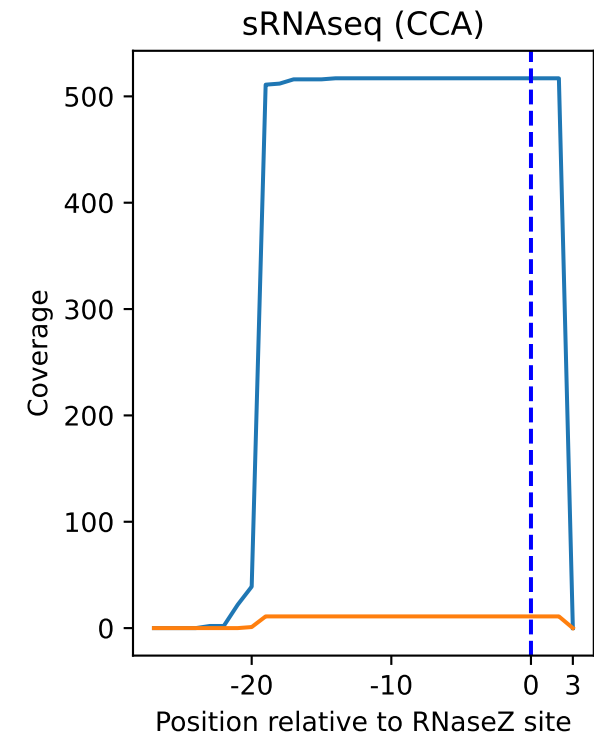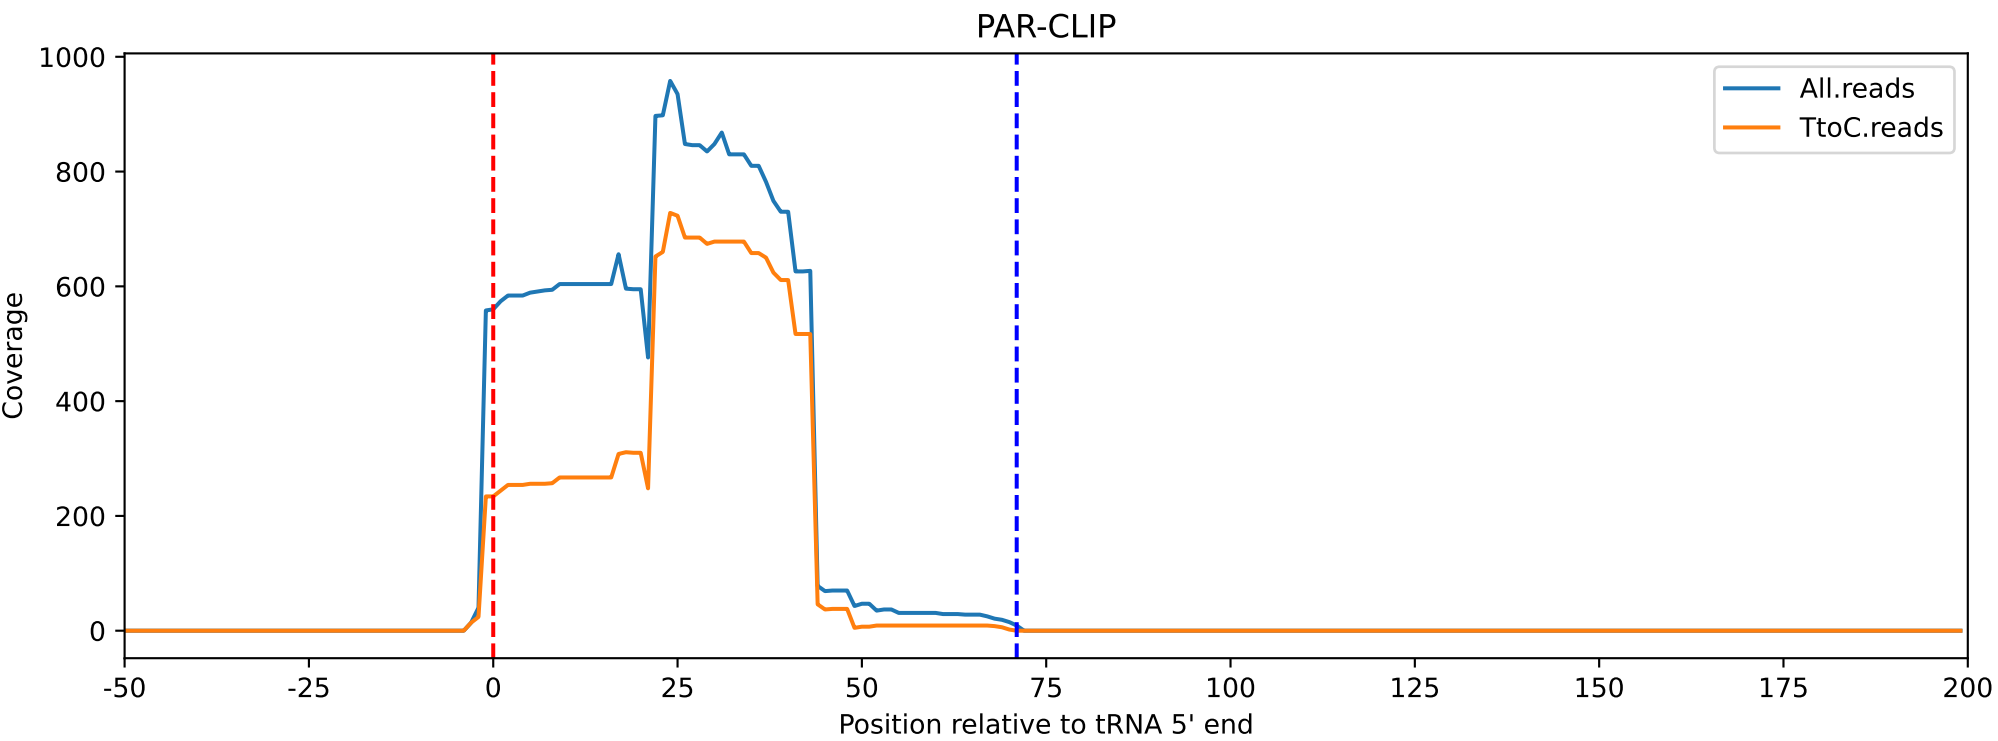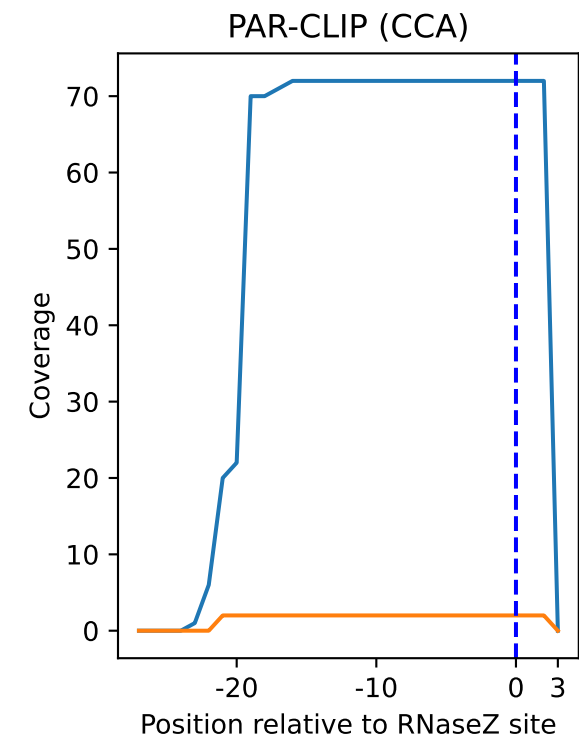

# tRNA-Ala-CGC-1-1

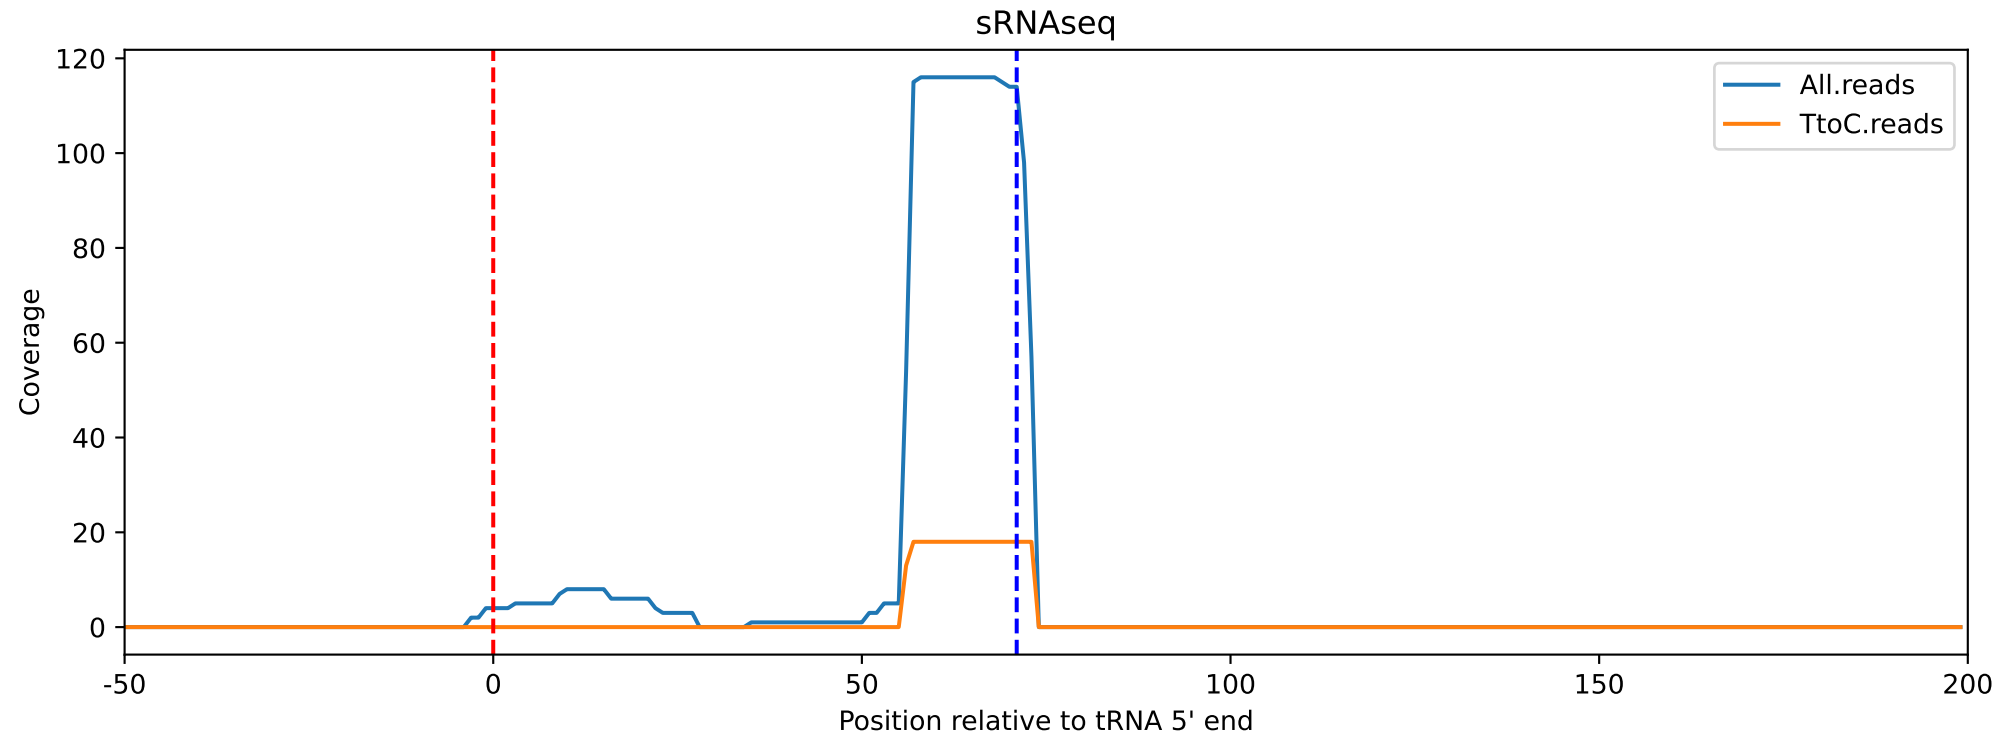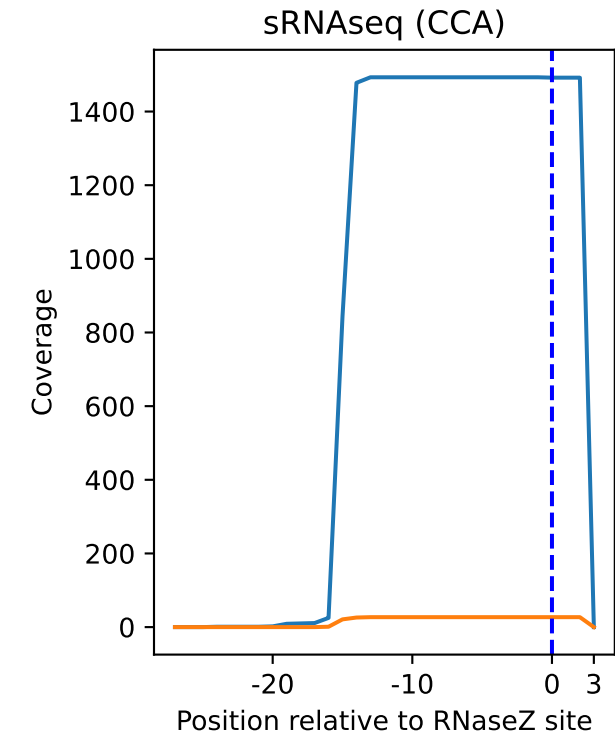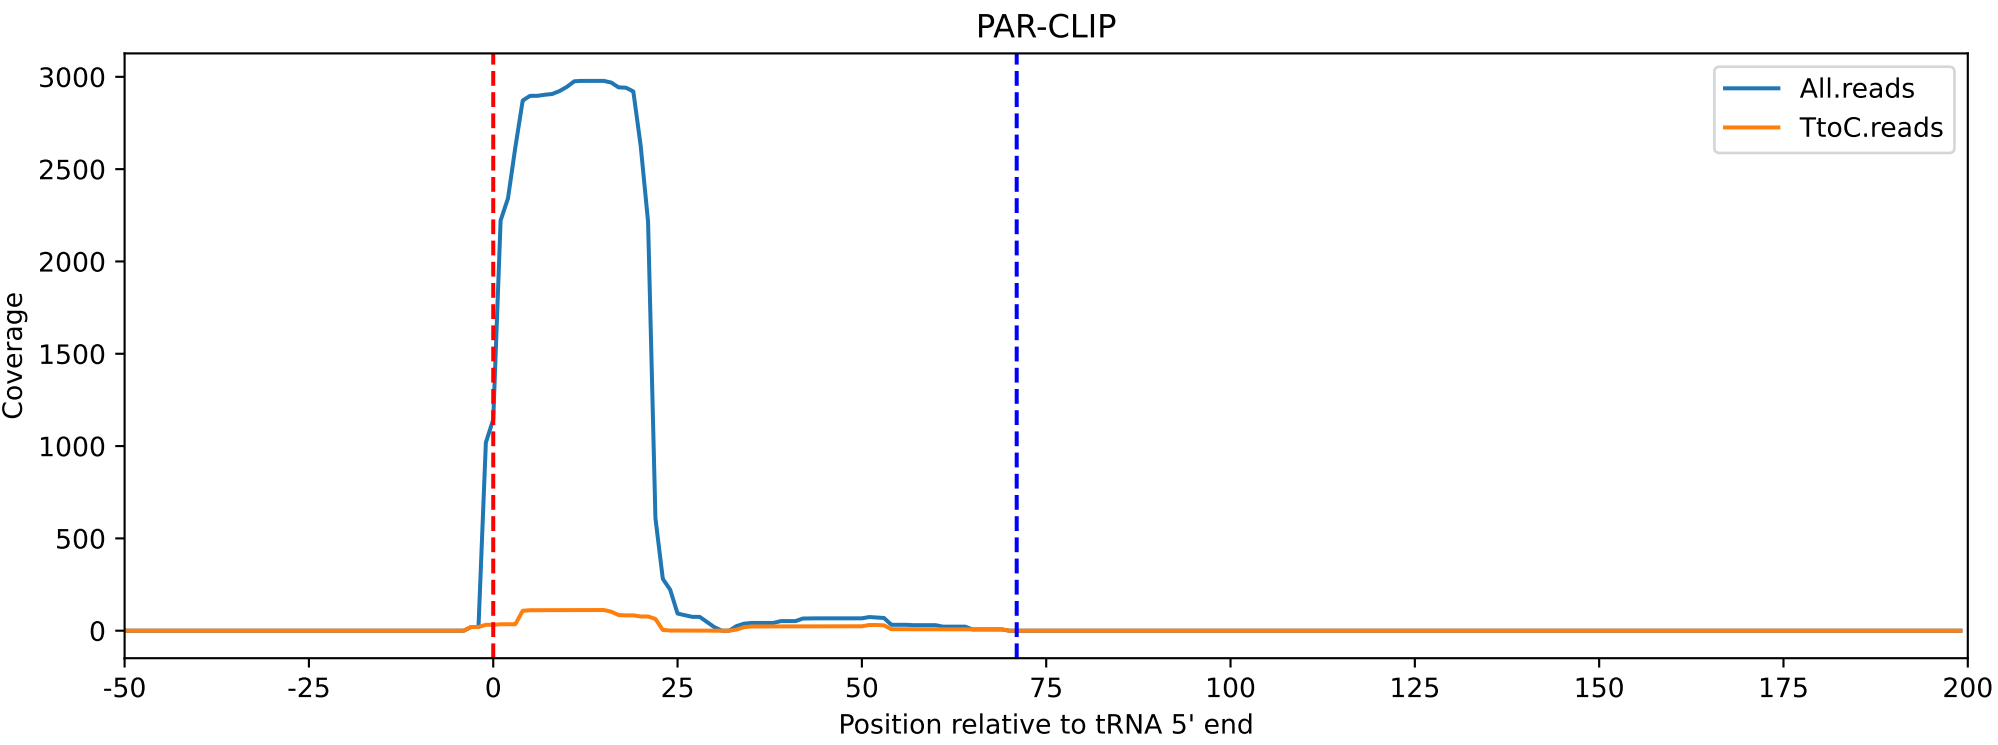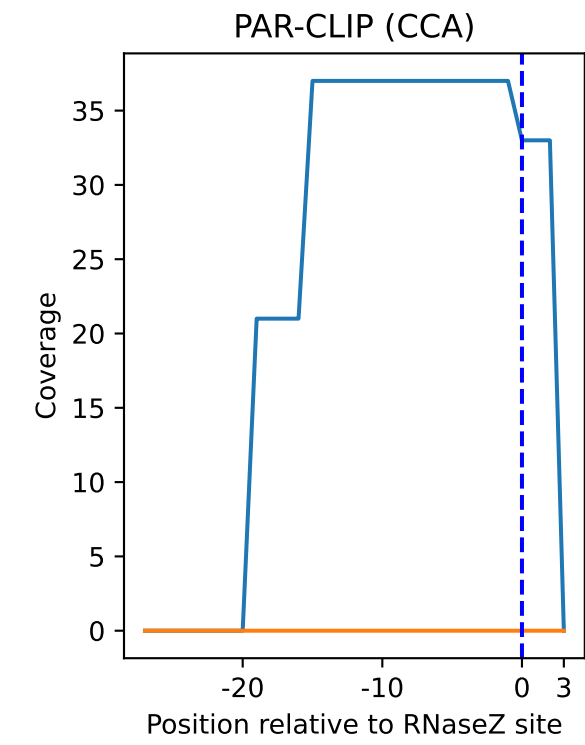

# tRNA-Glu-CTC-1-1

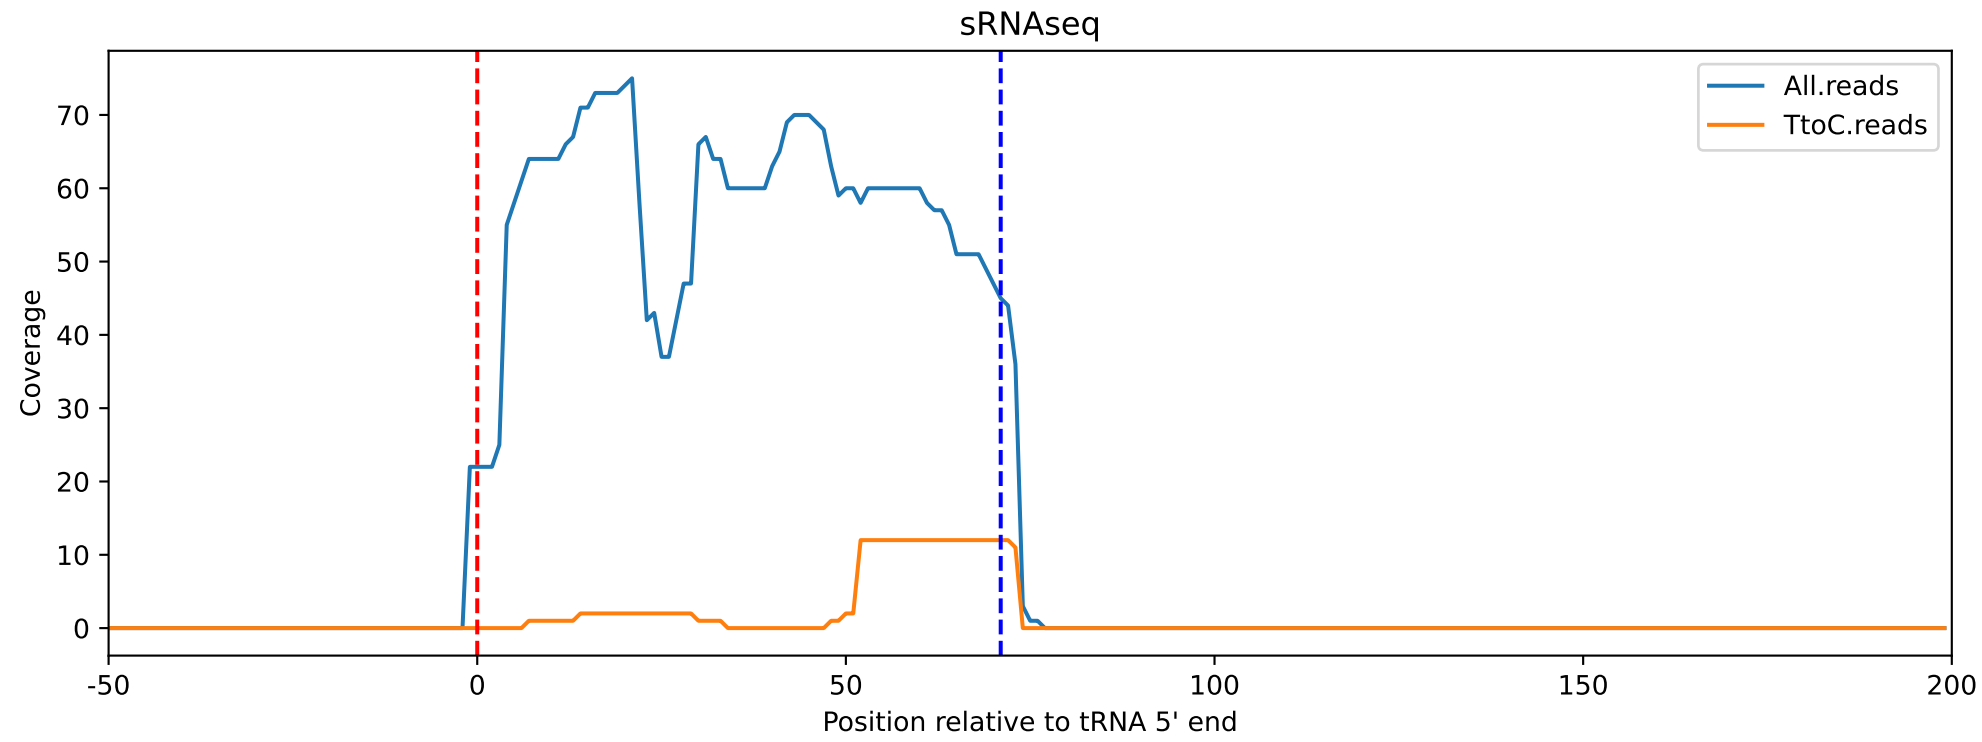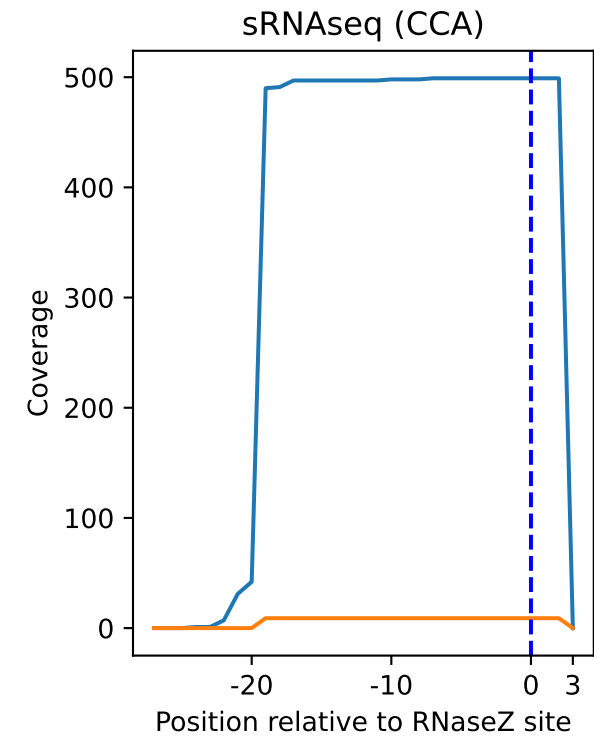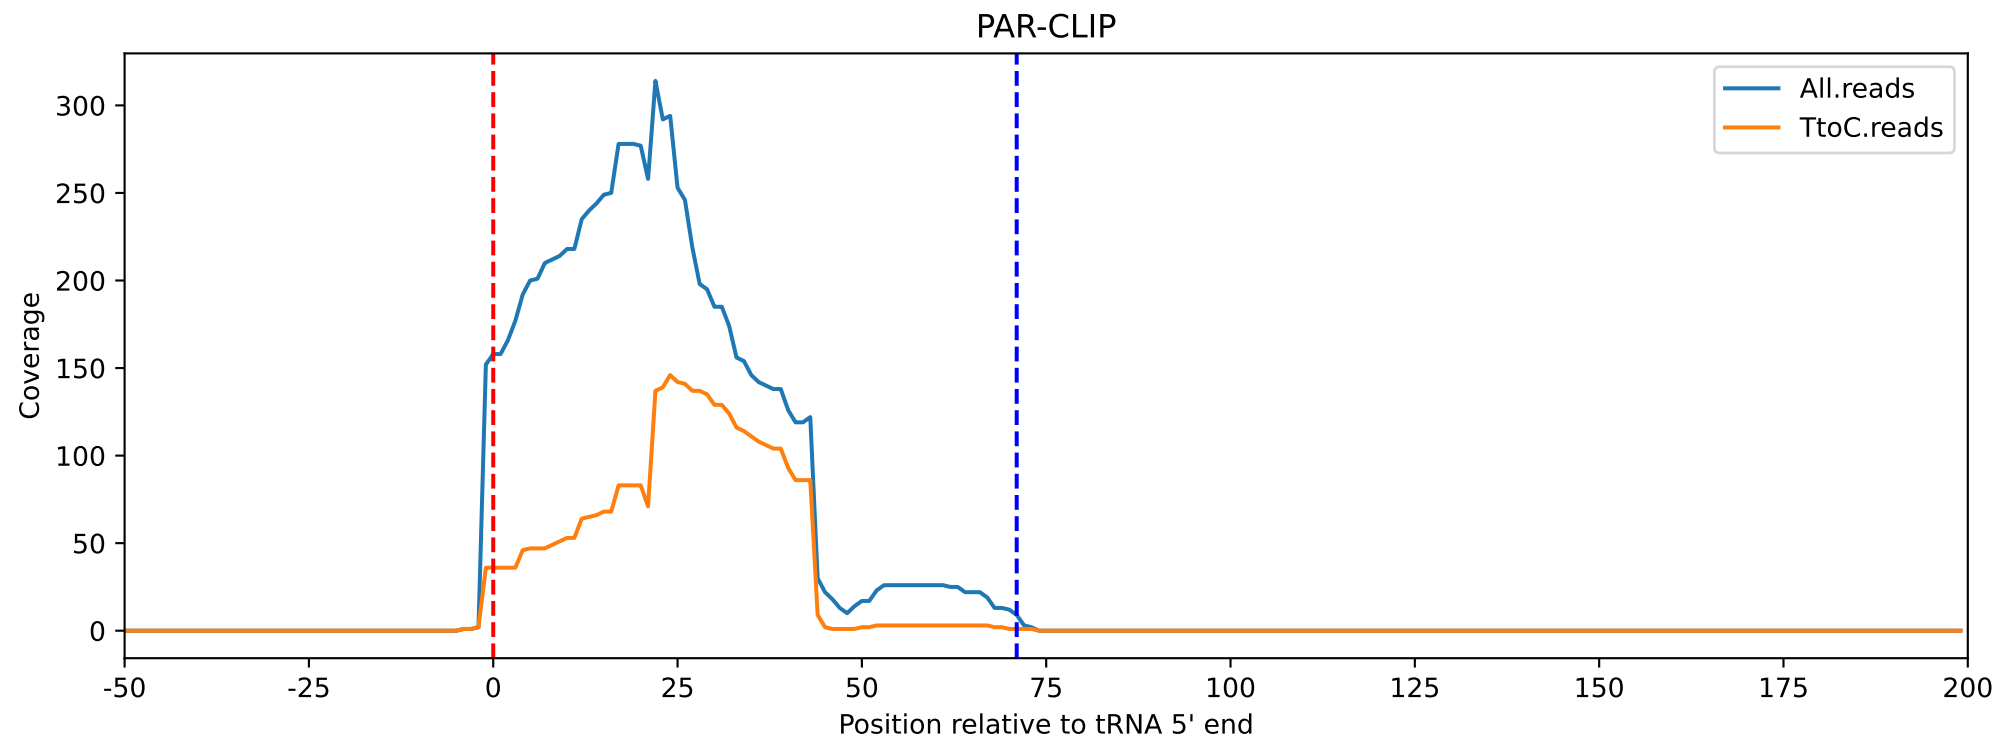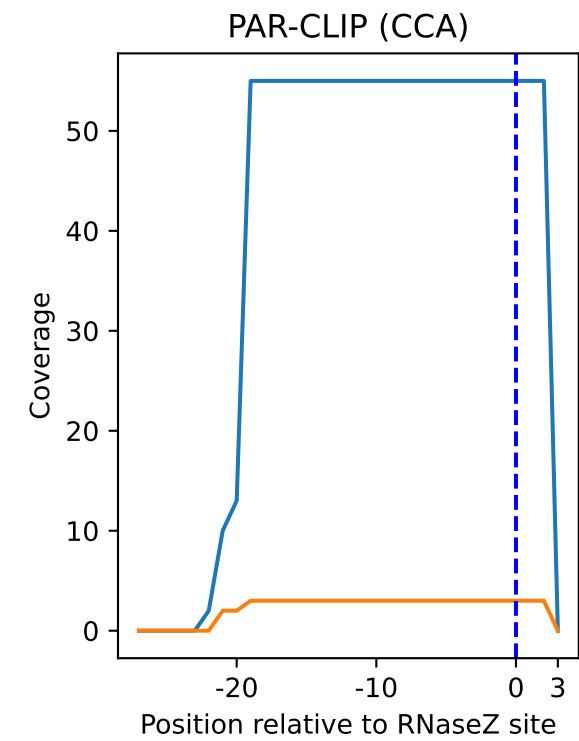

# tRNA-Ser-AGA-3-2

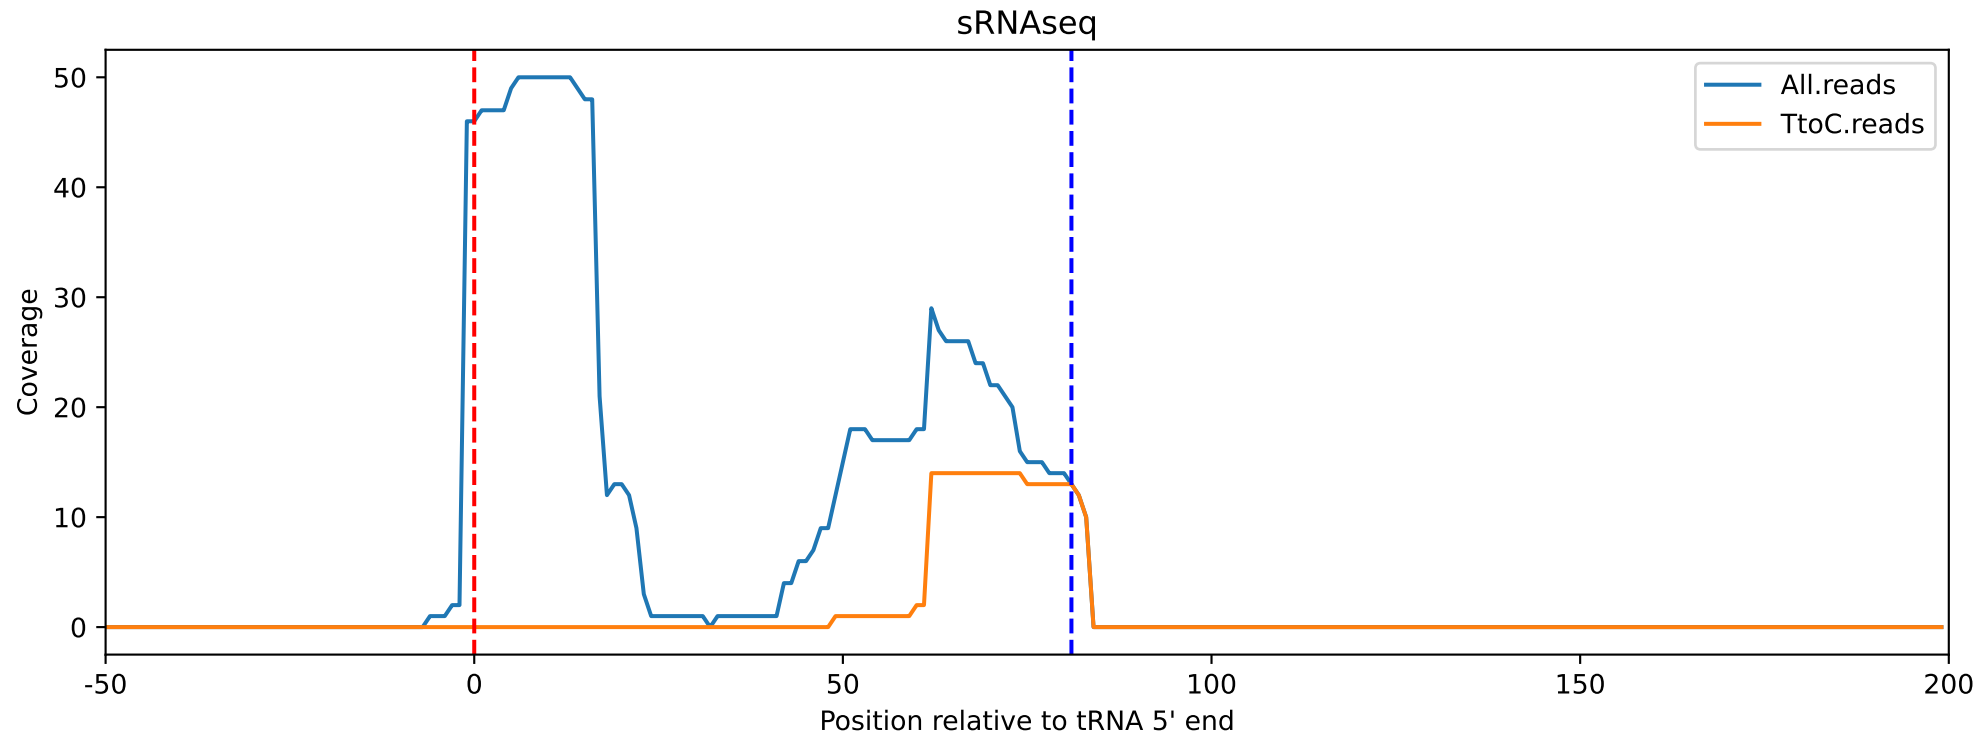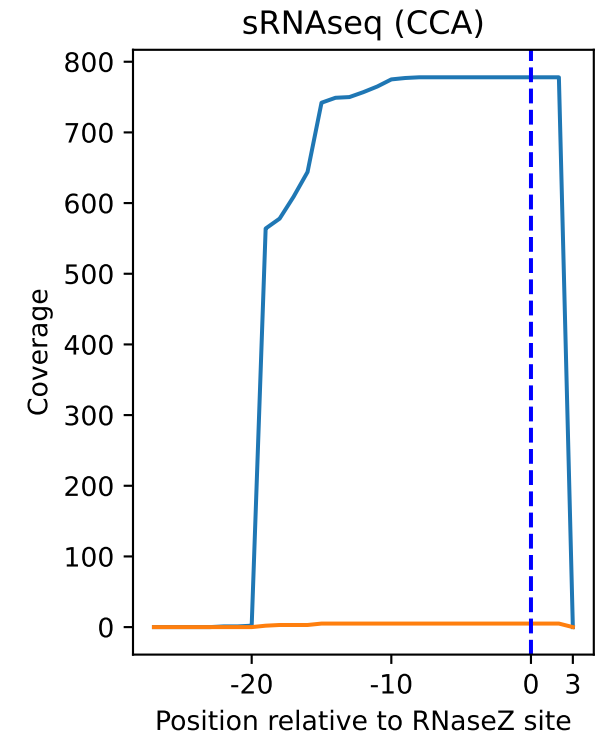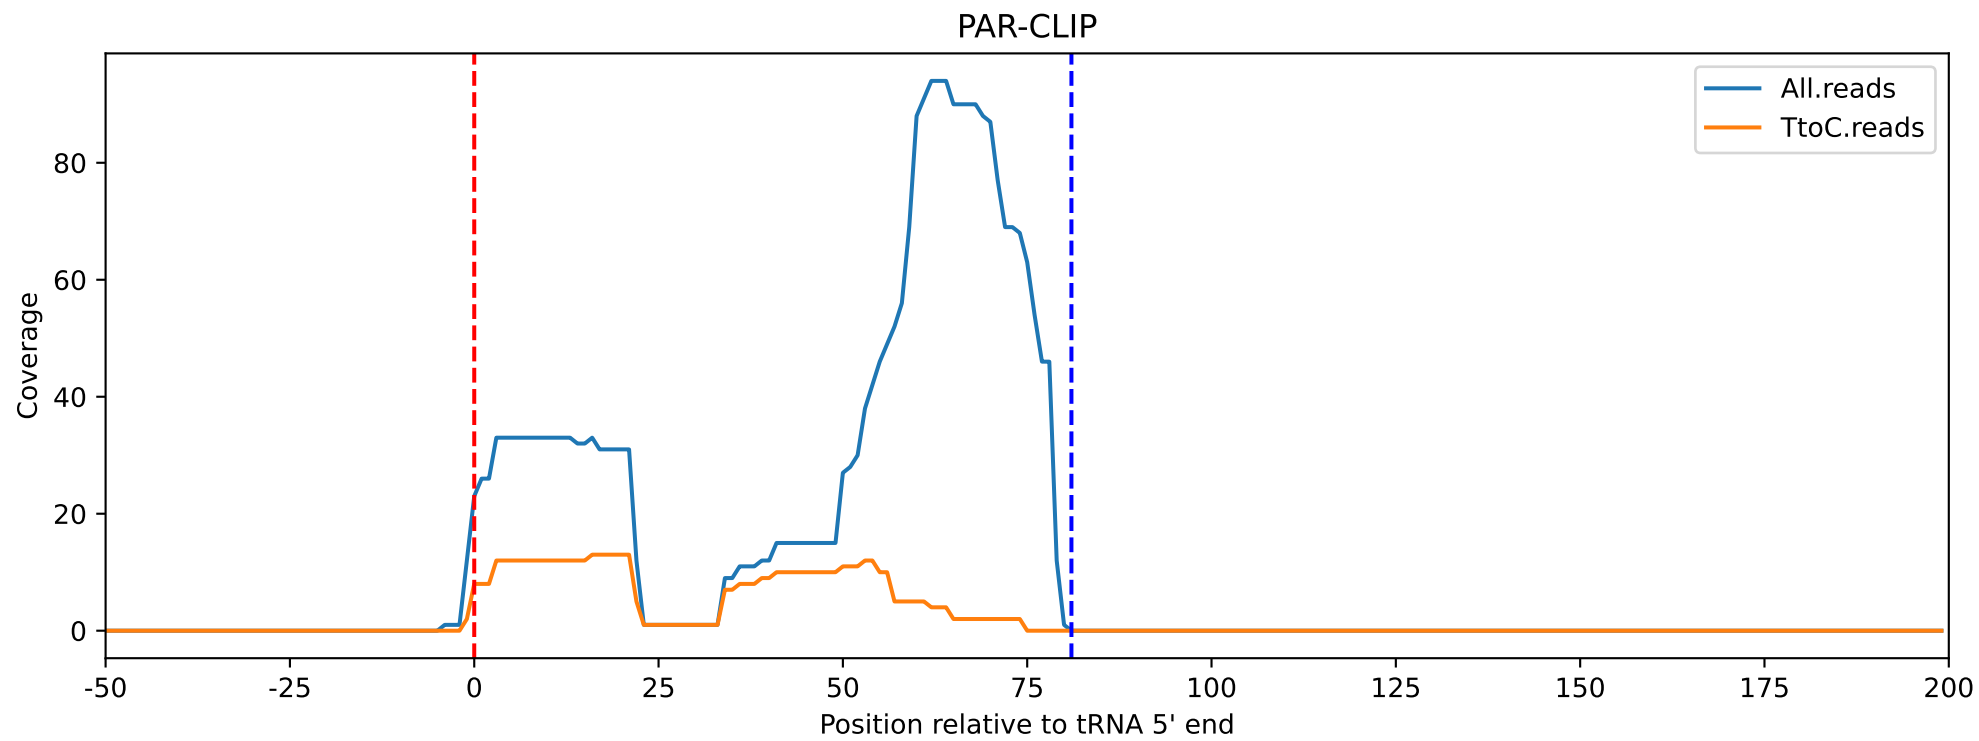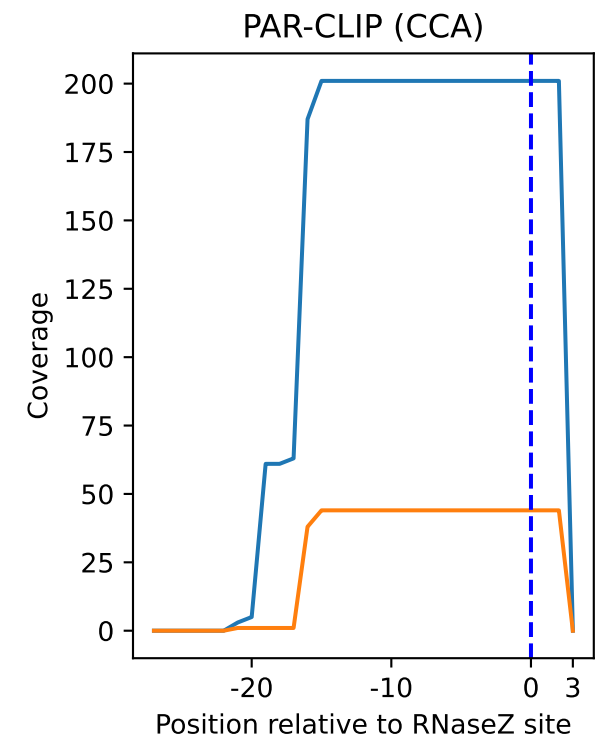

# tRNA-Phe-GAA-1-3

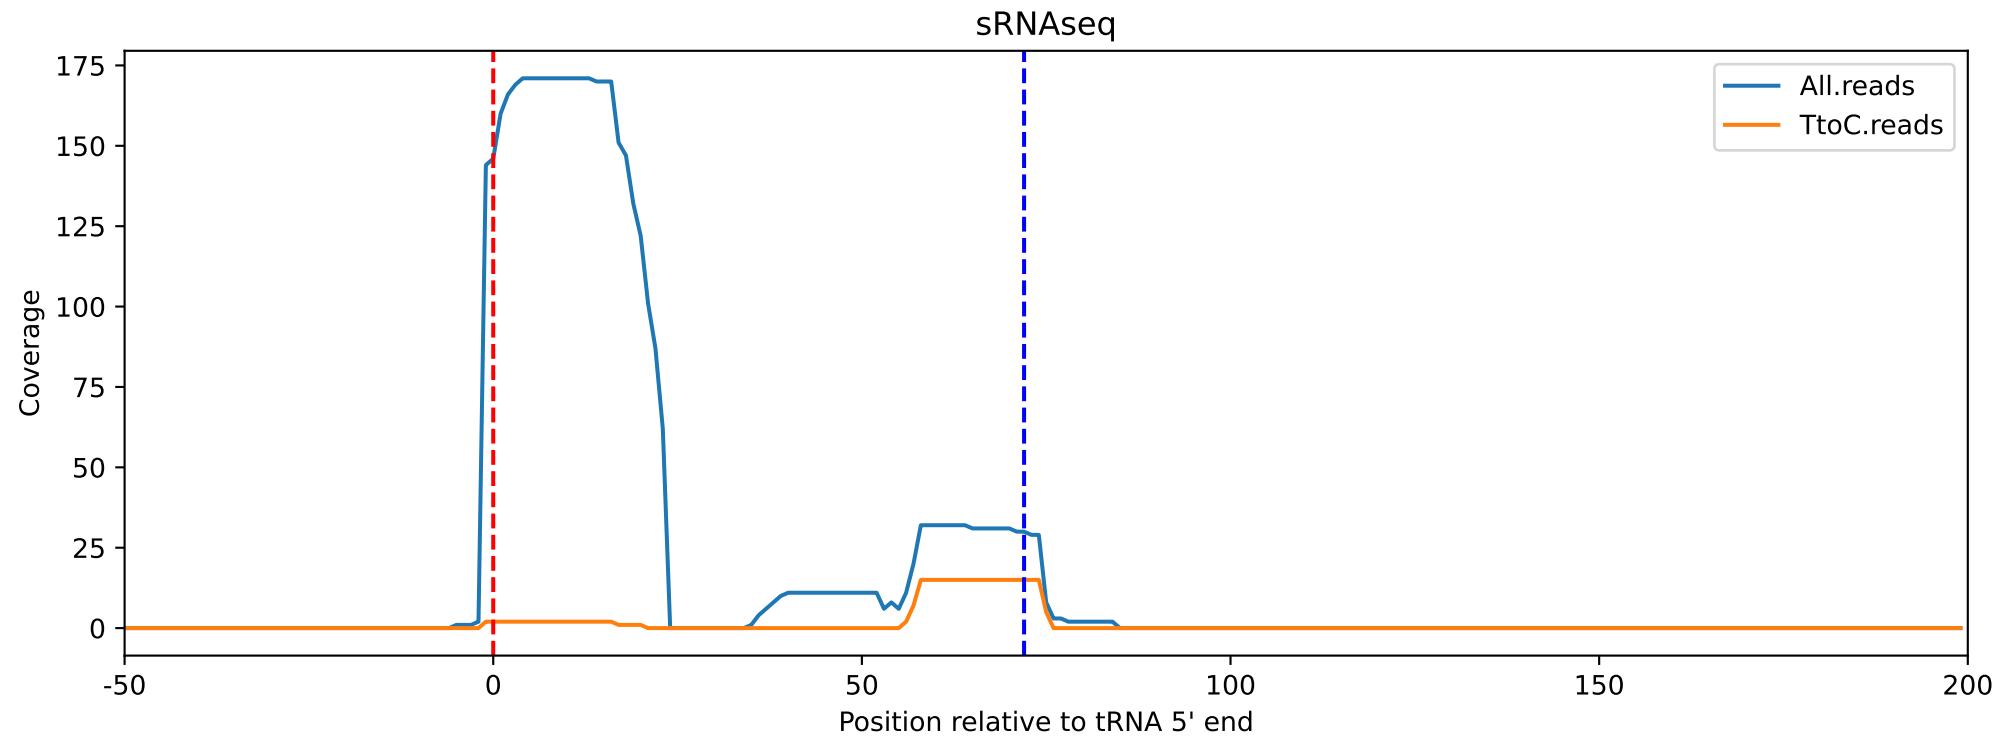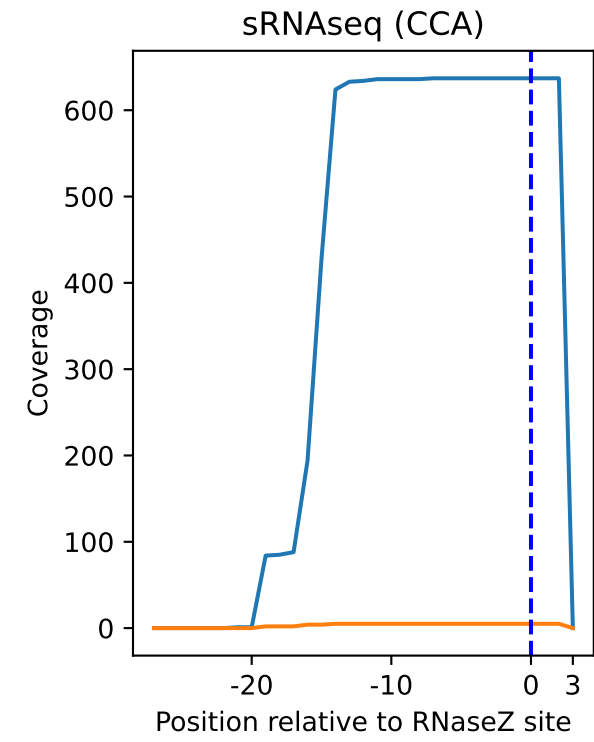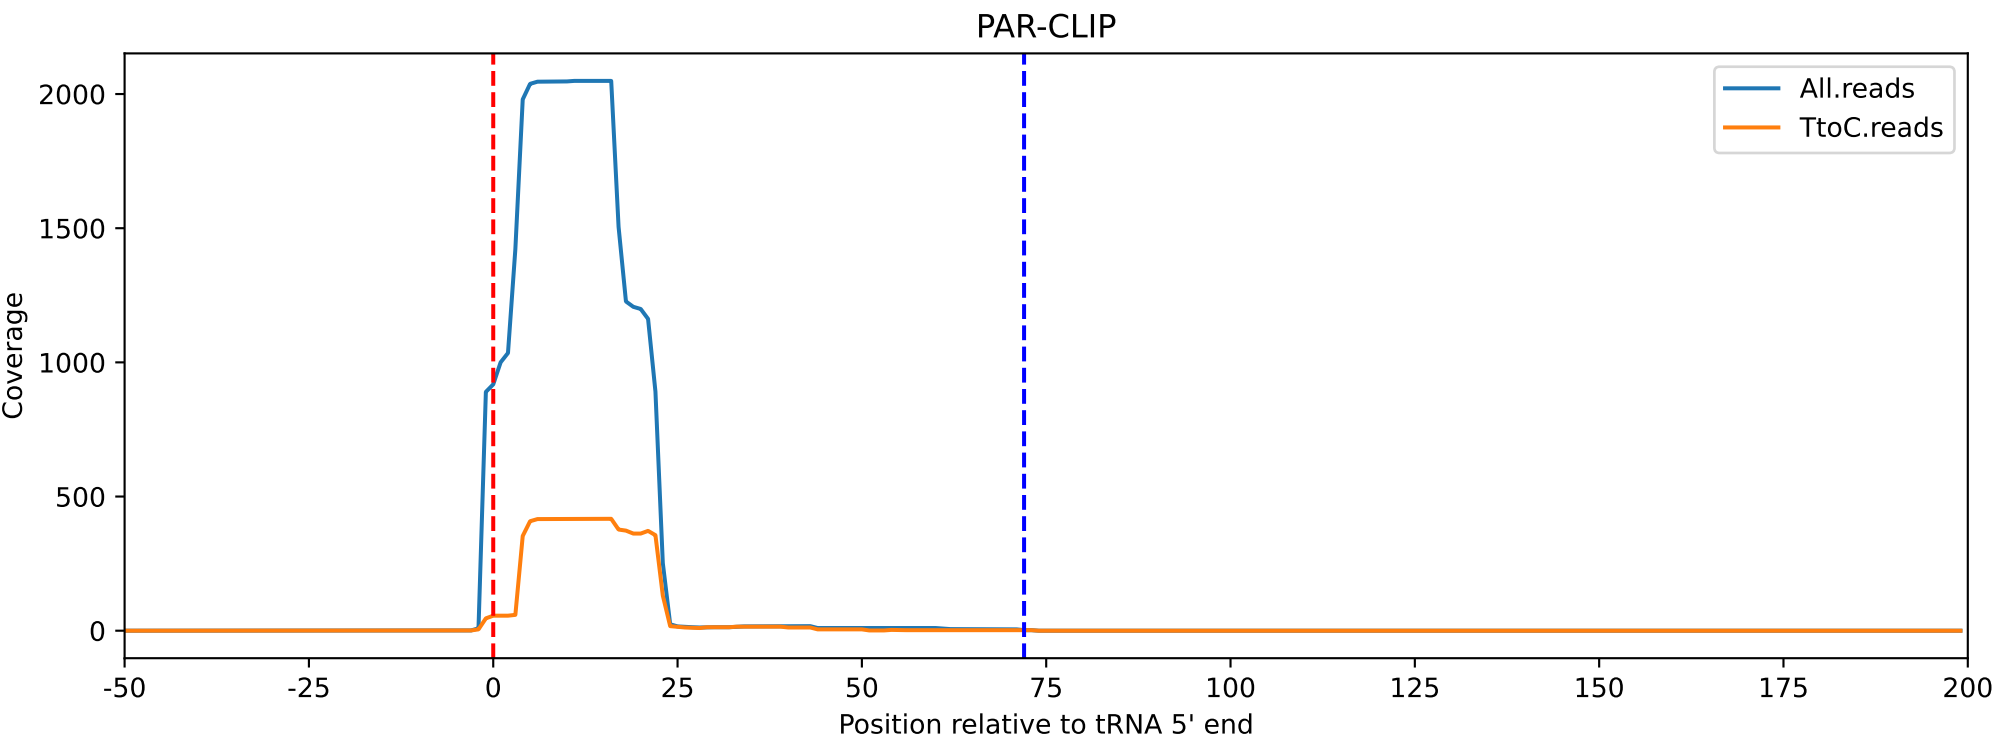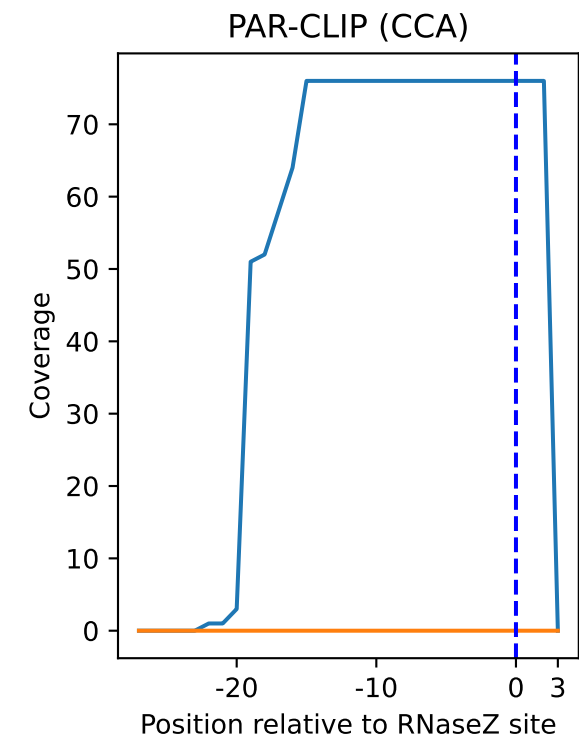

# tRNA-Lys-CTT-1-12

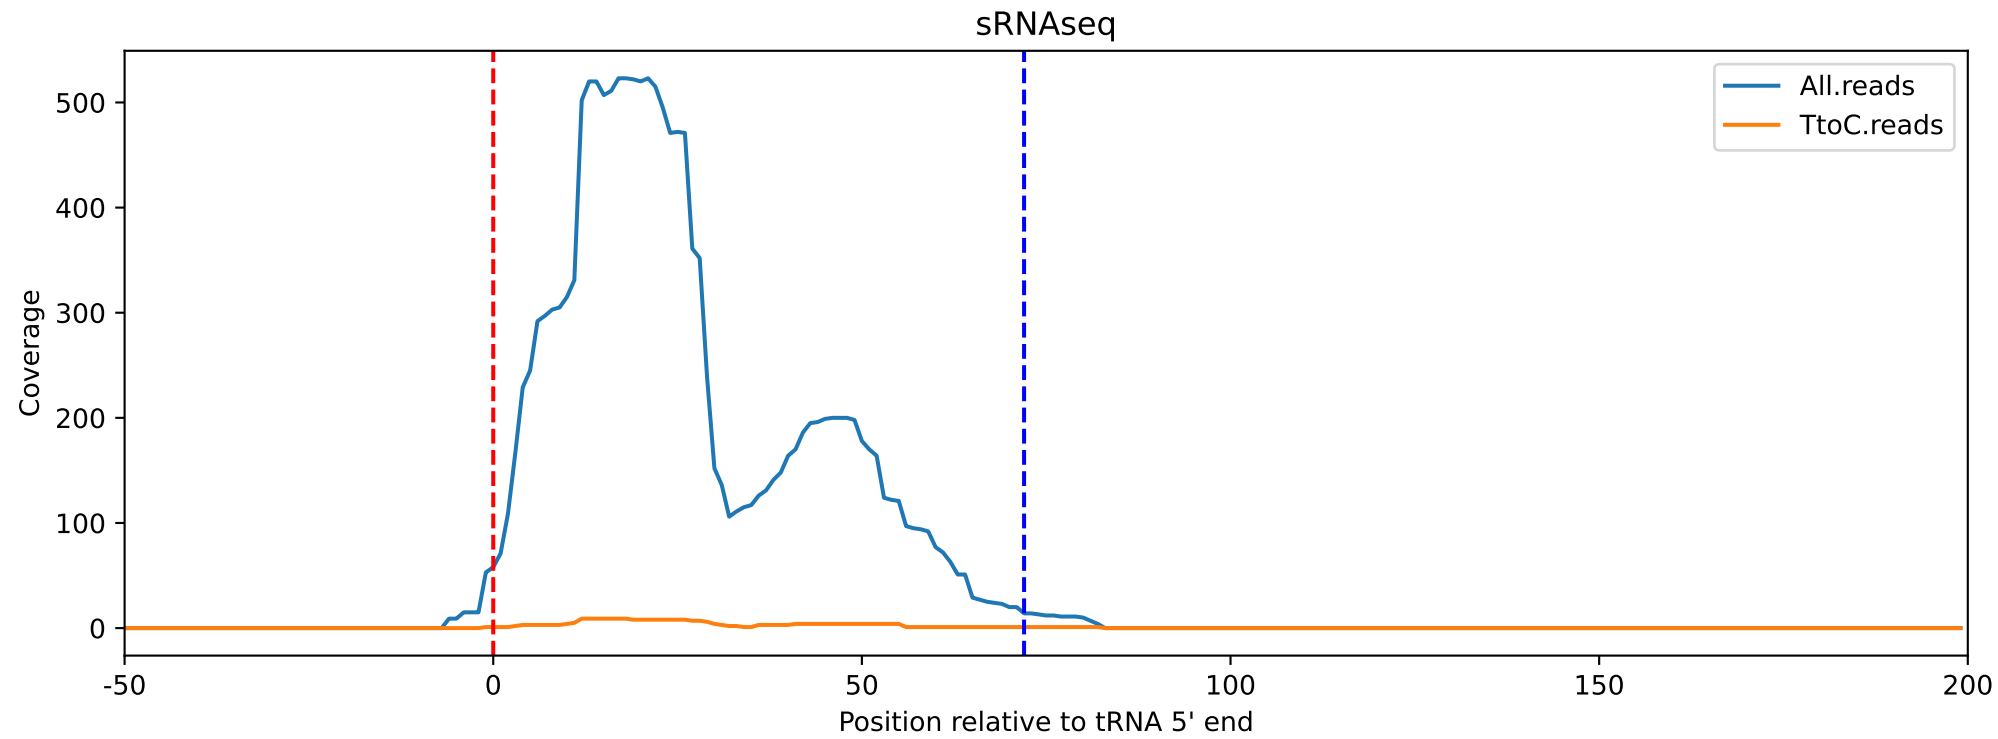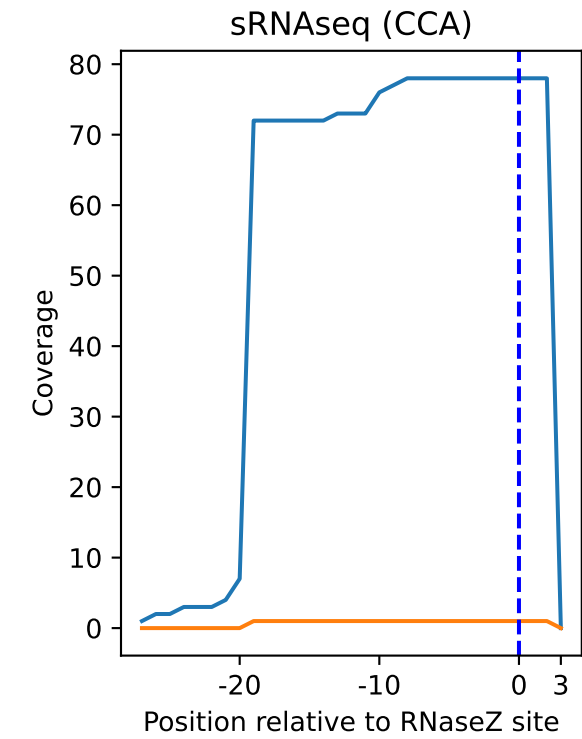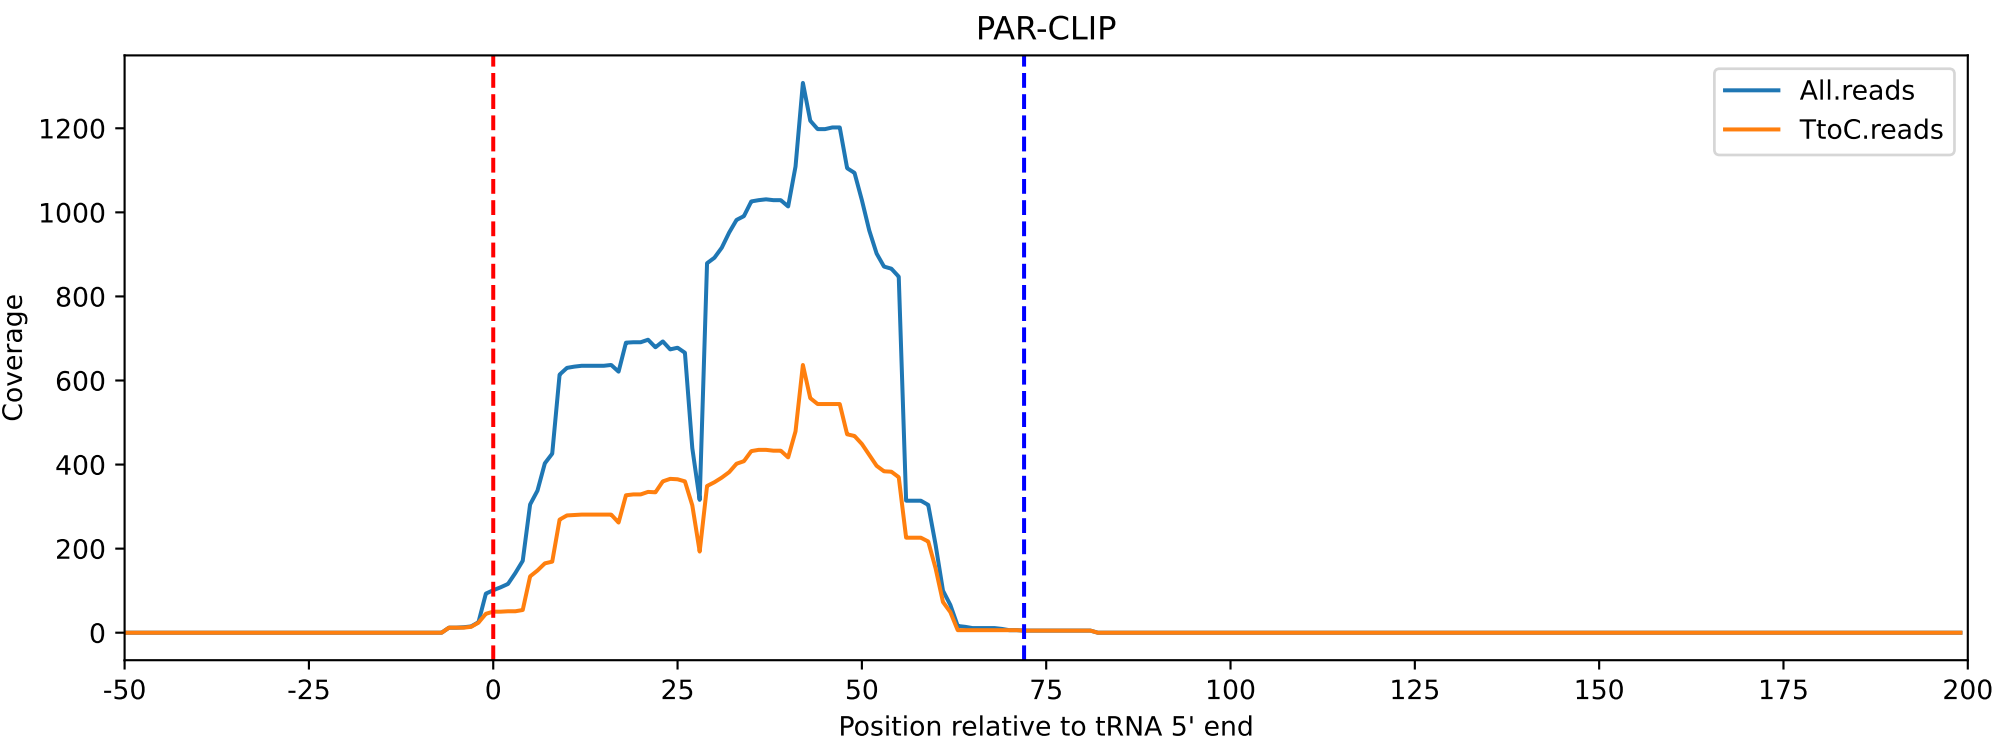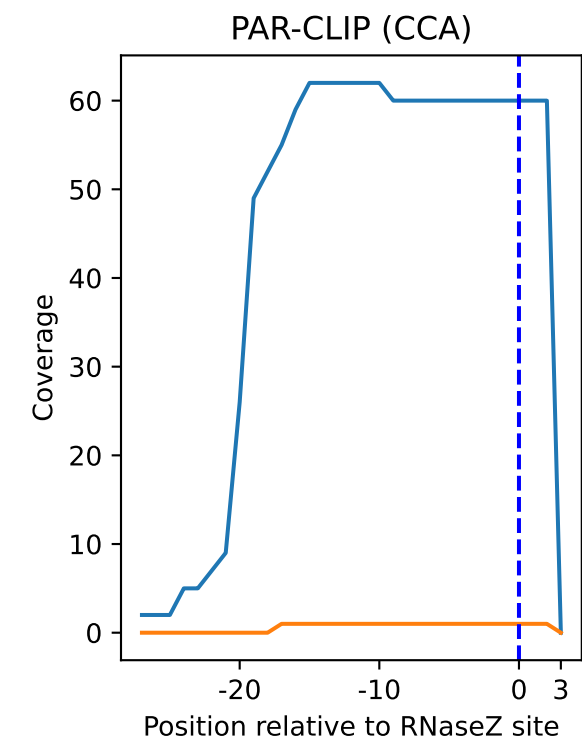

# tRNA-Asp-GTC-1-11

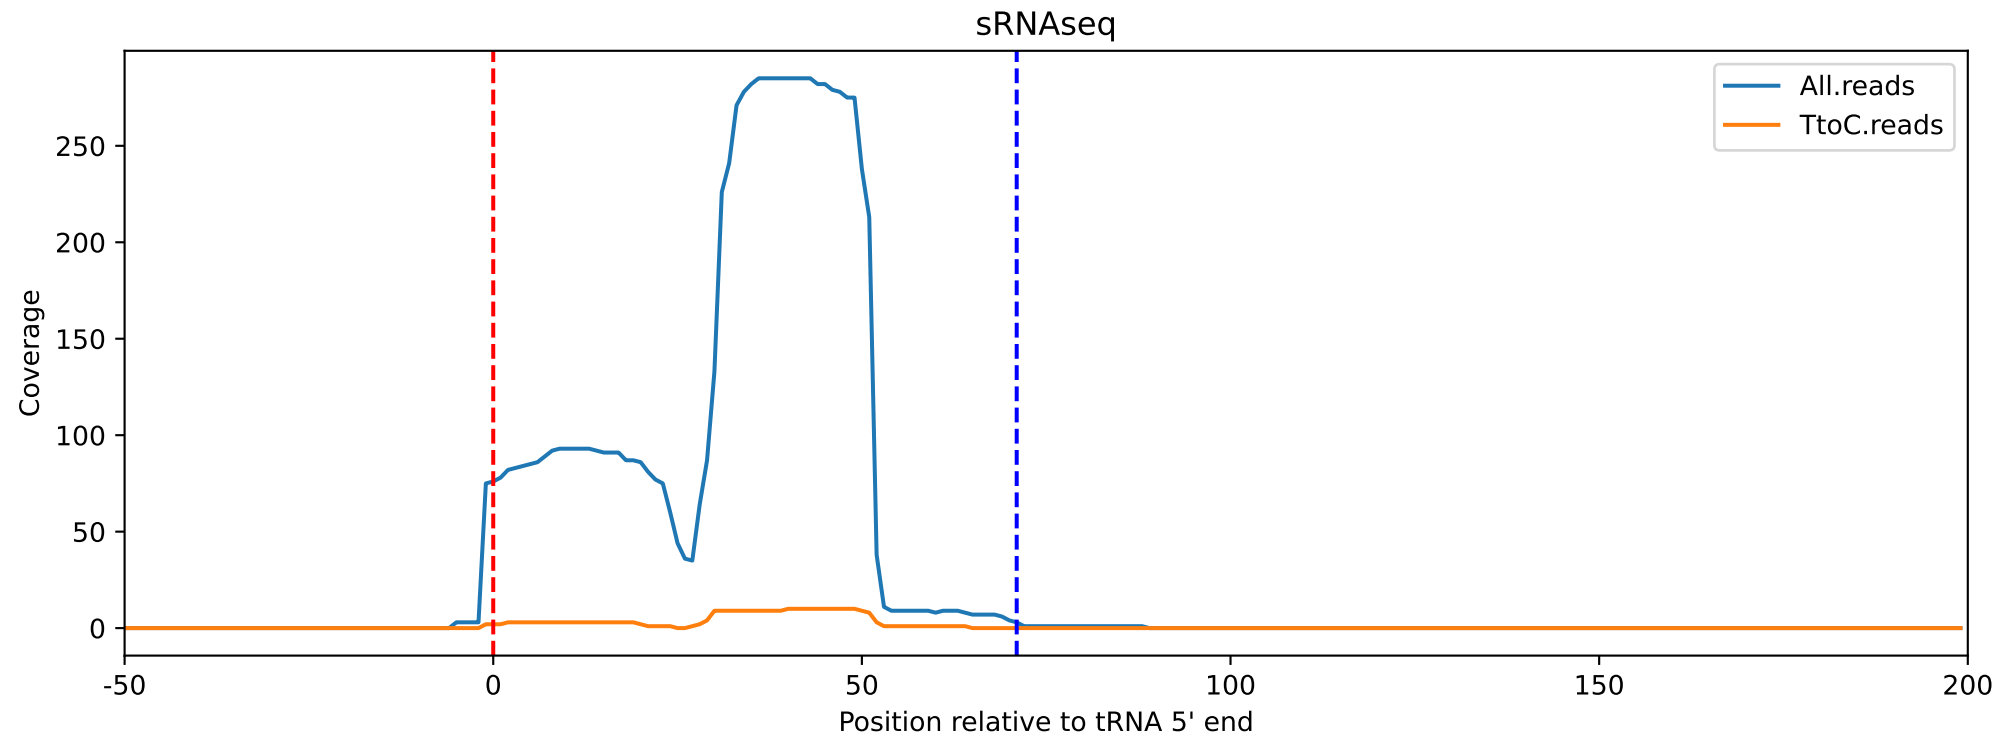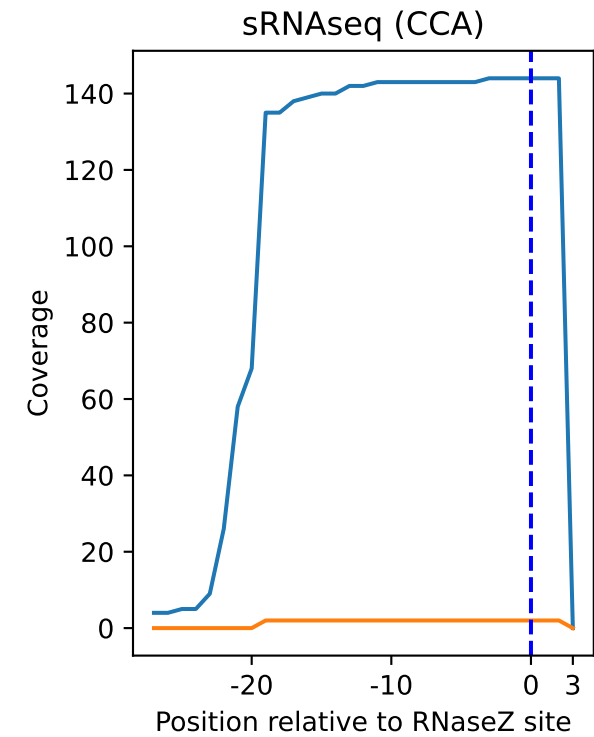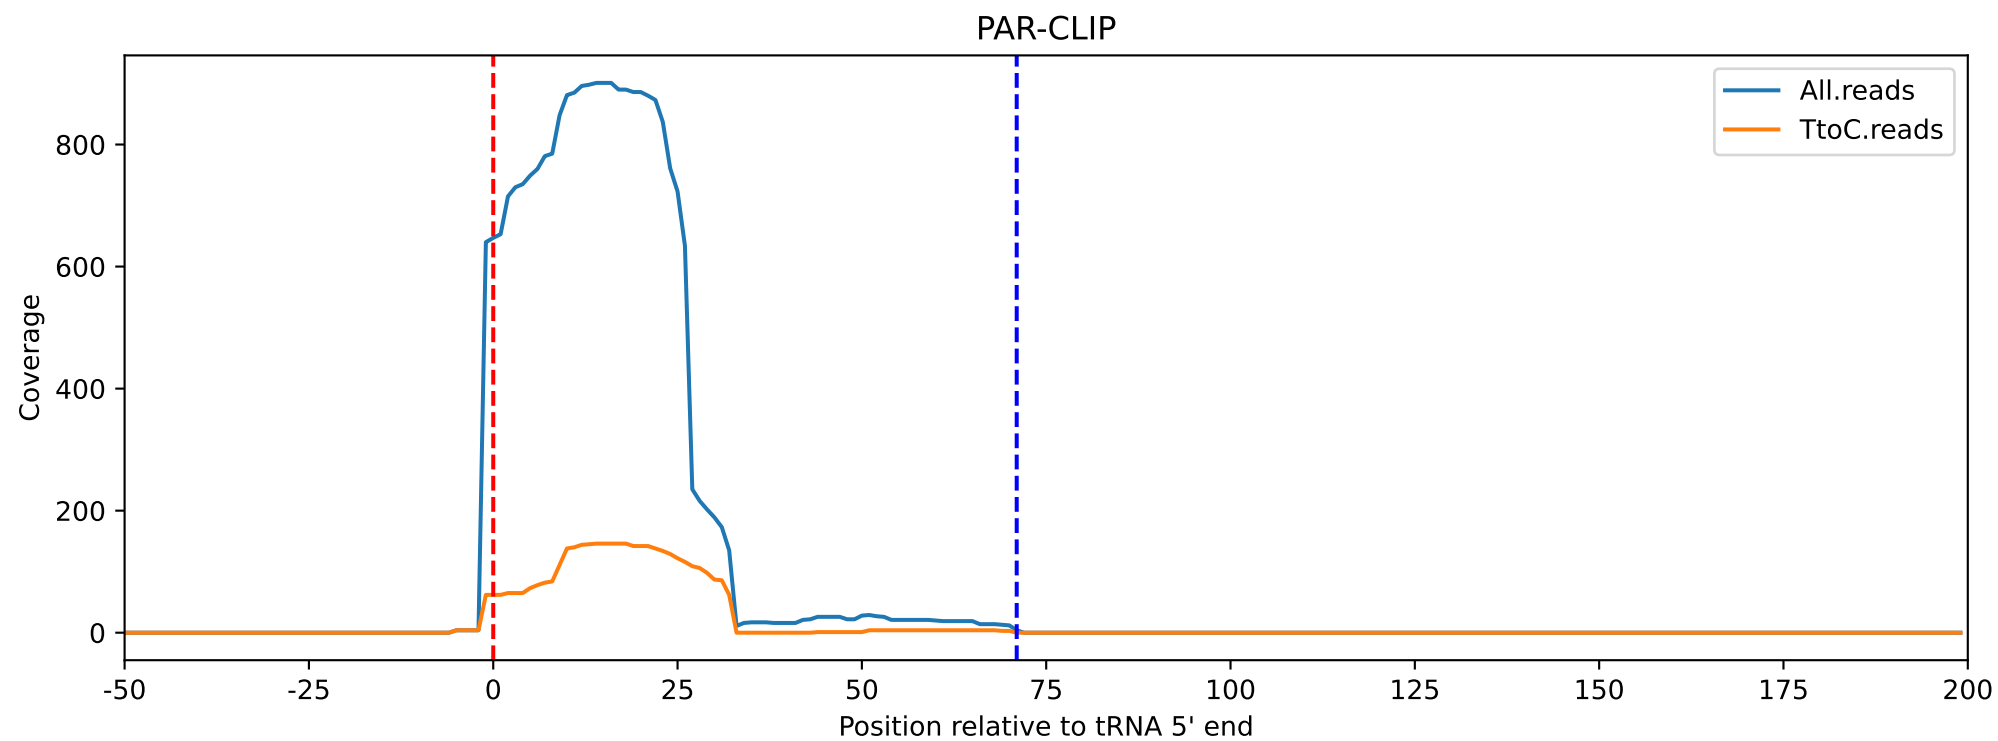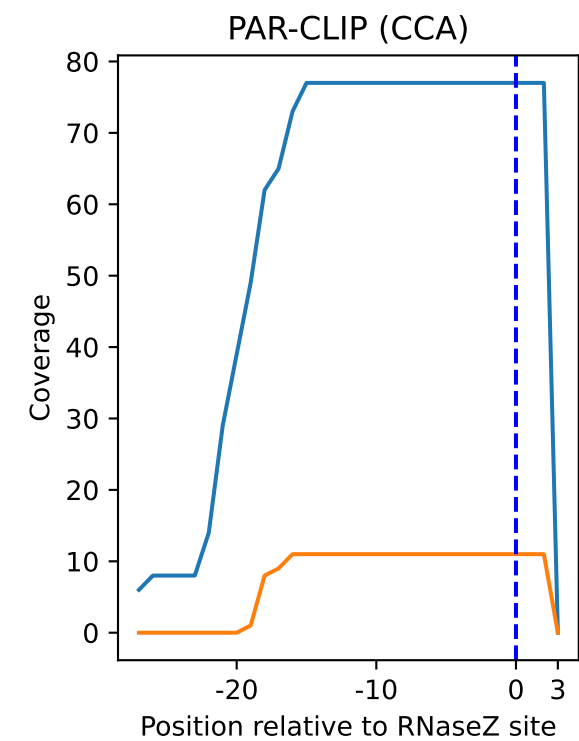



# tRNA-Lys-CTT-1-4

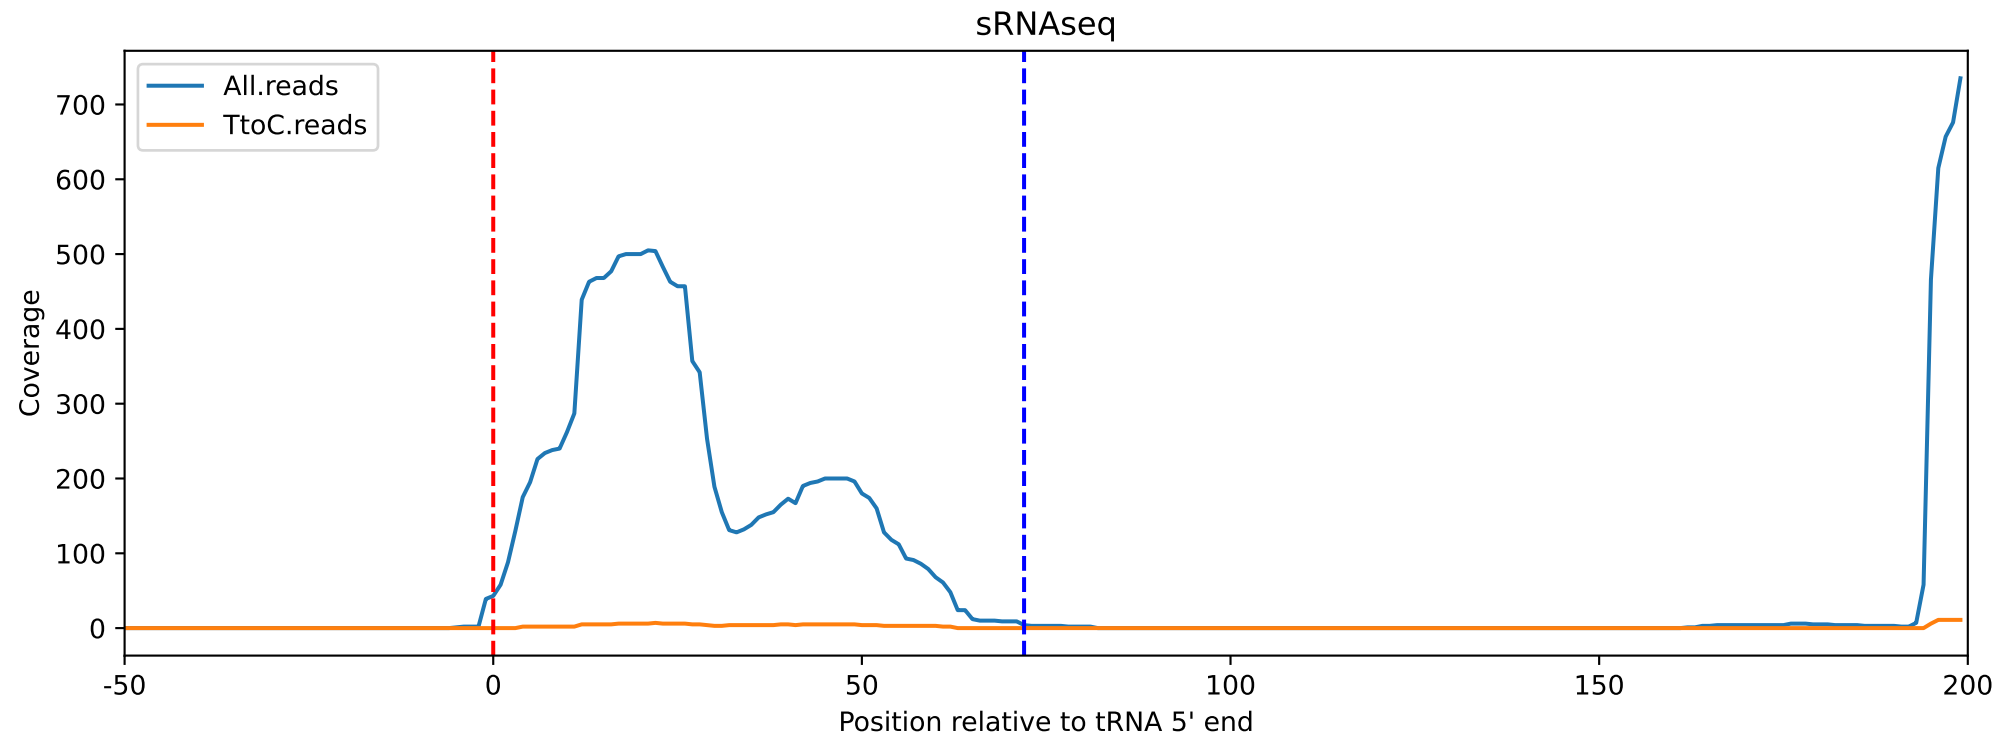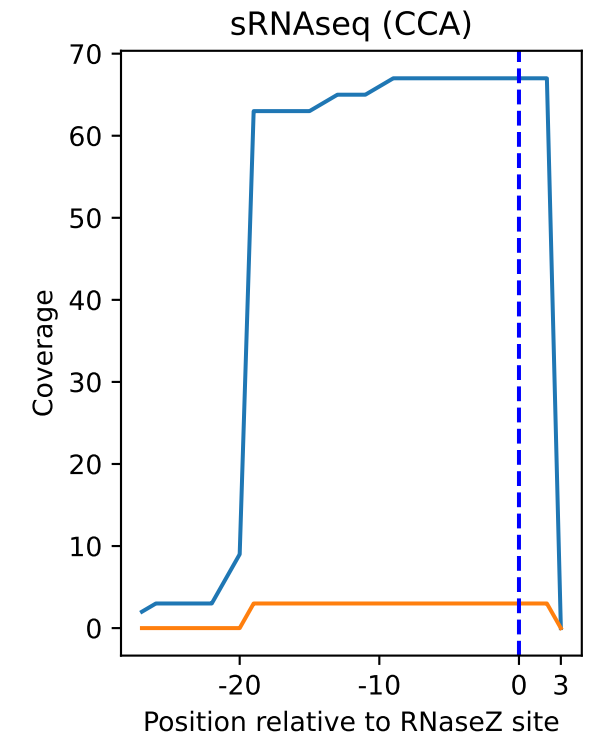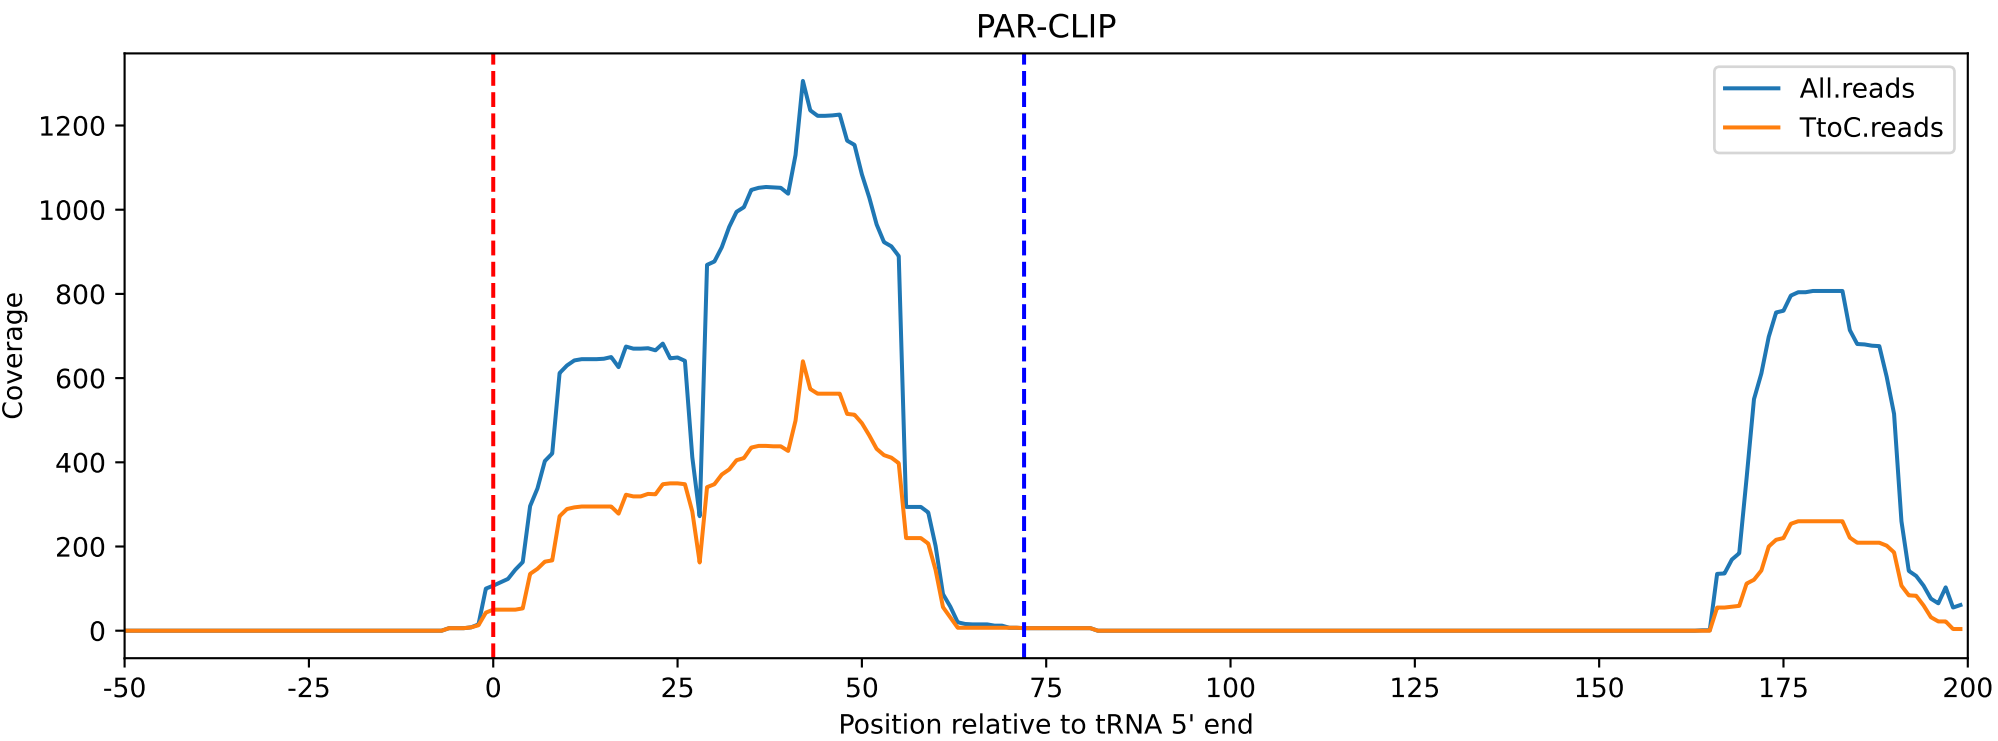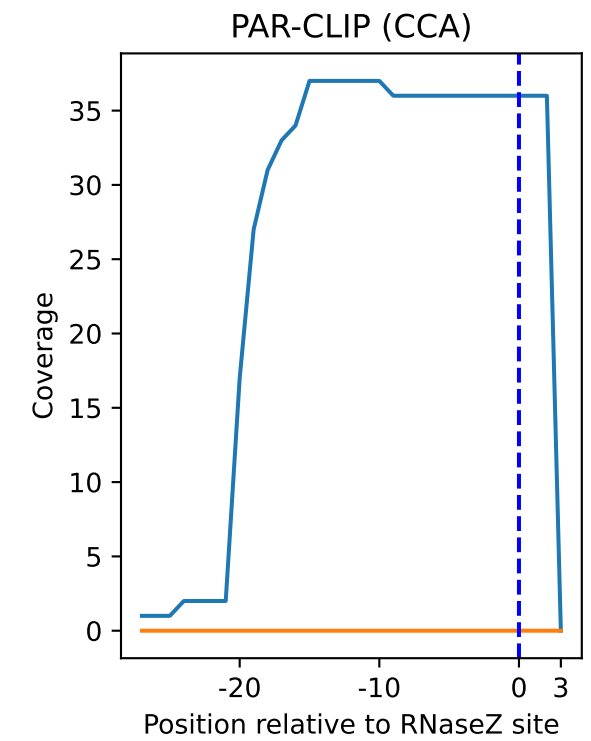

# tRNA-Pro-TGG-1-3

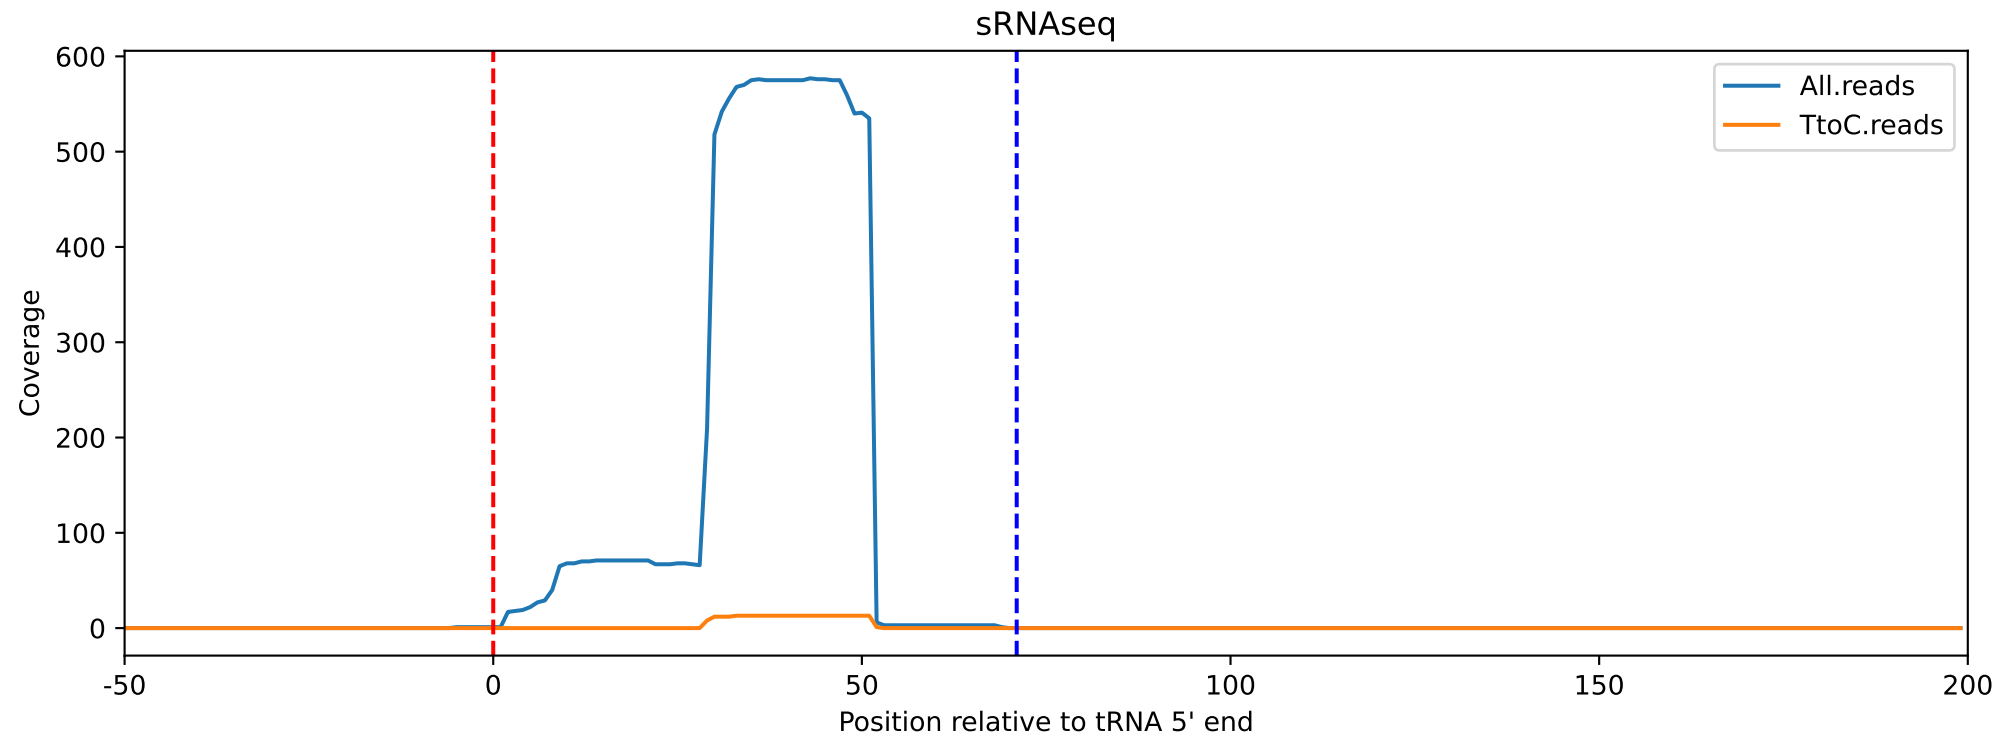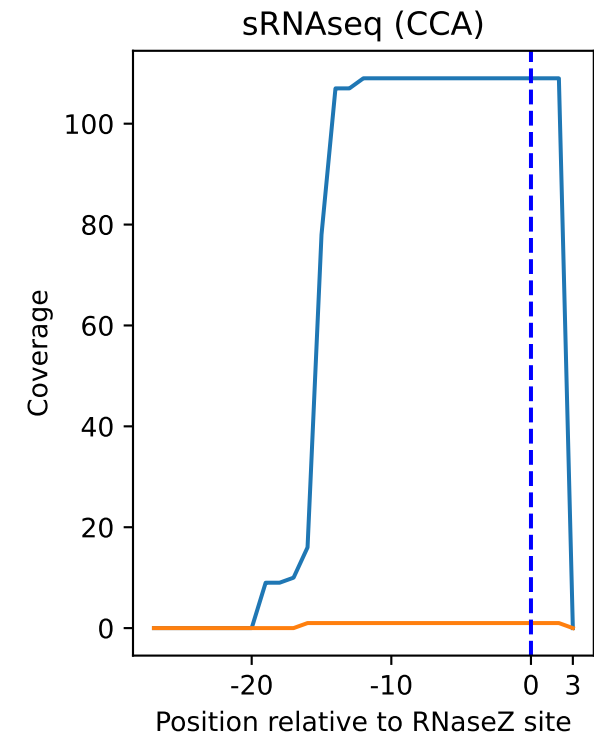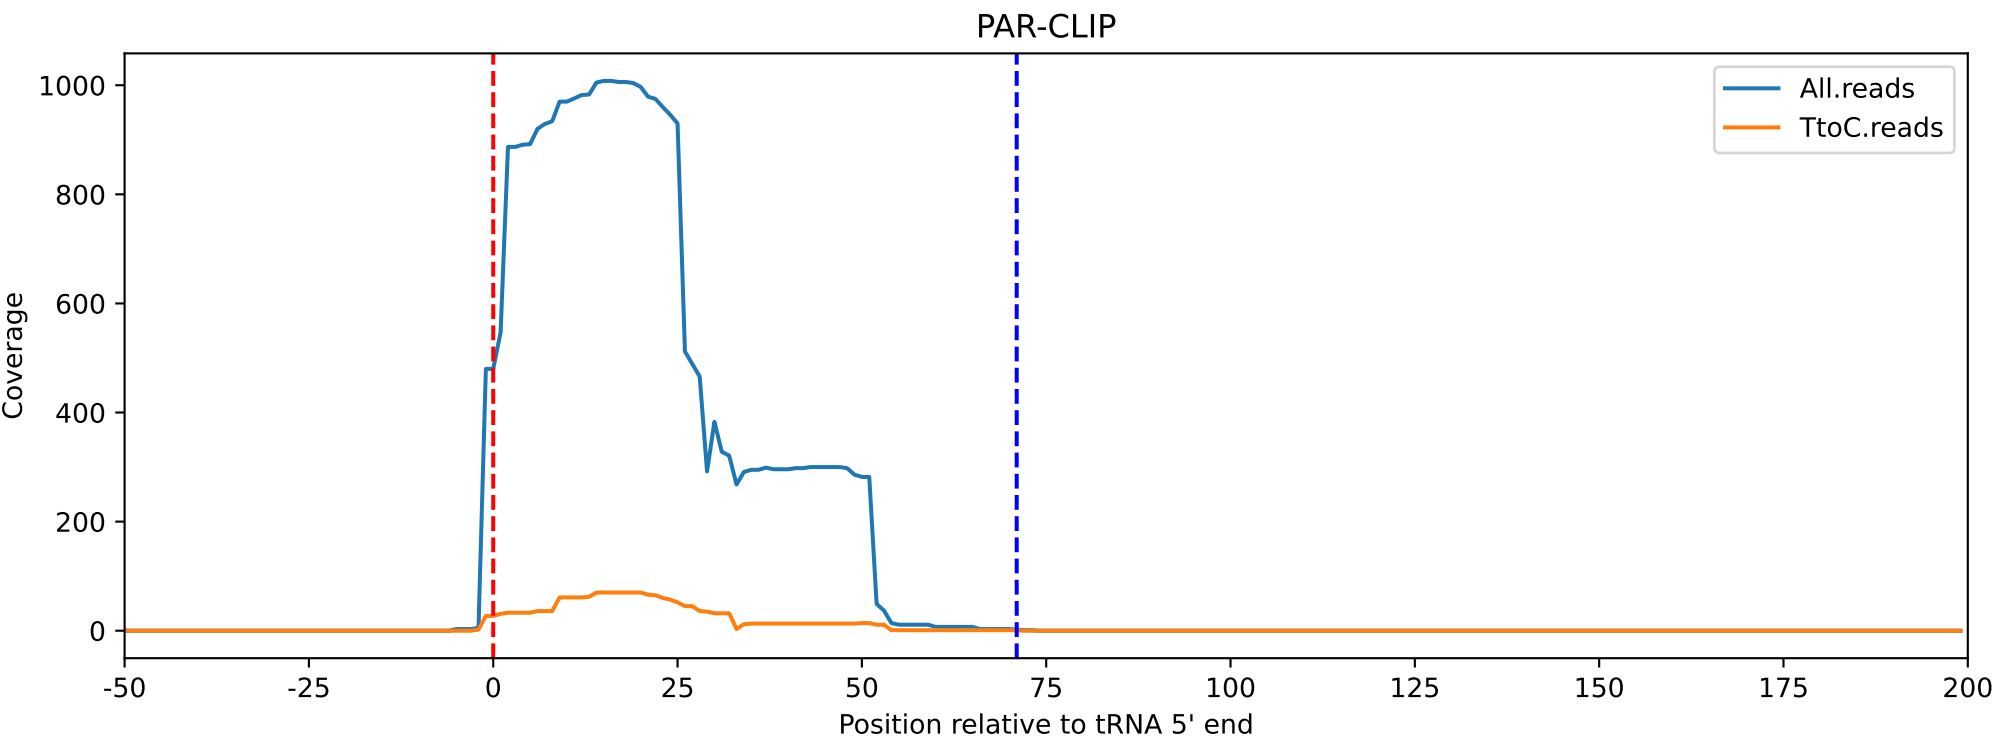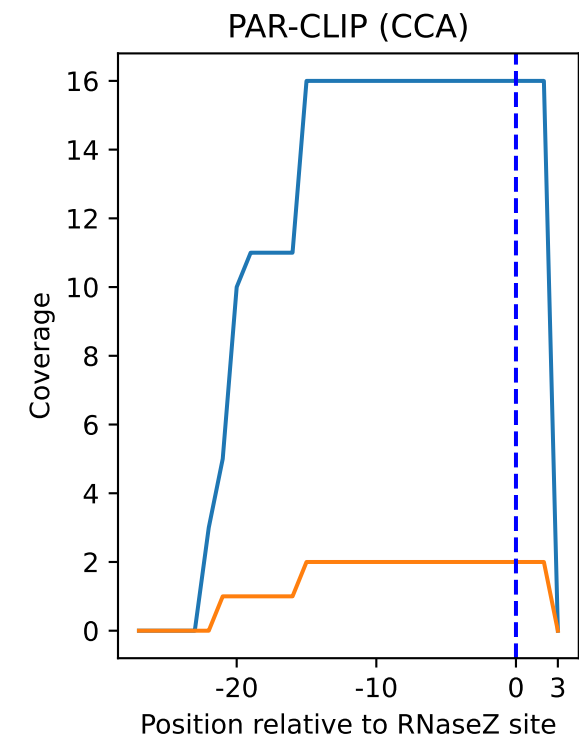

# tRNA-Pro-TGG-1-4

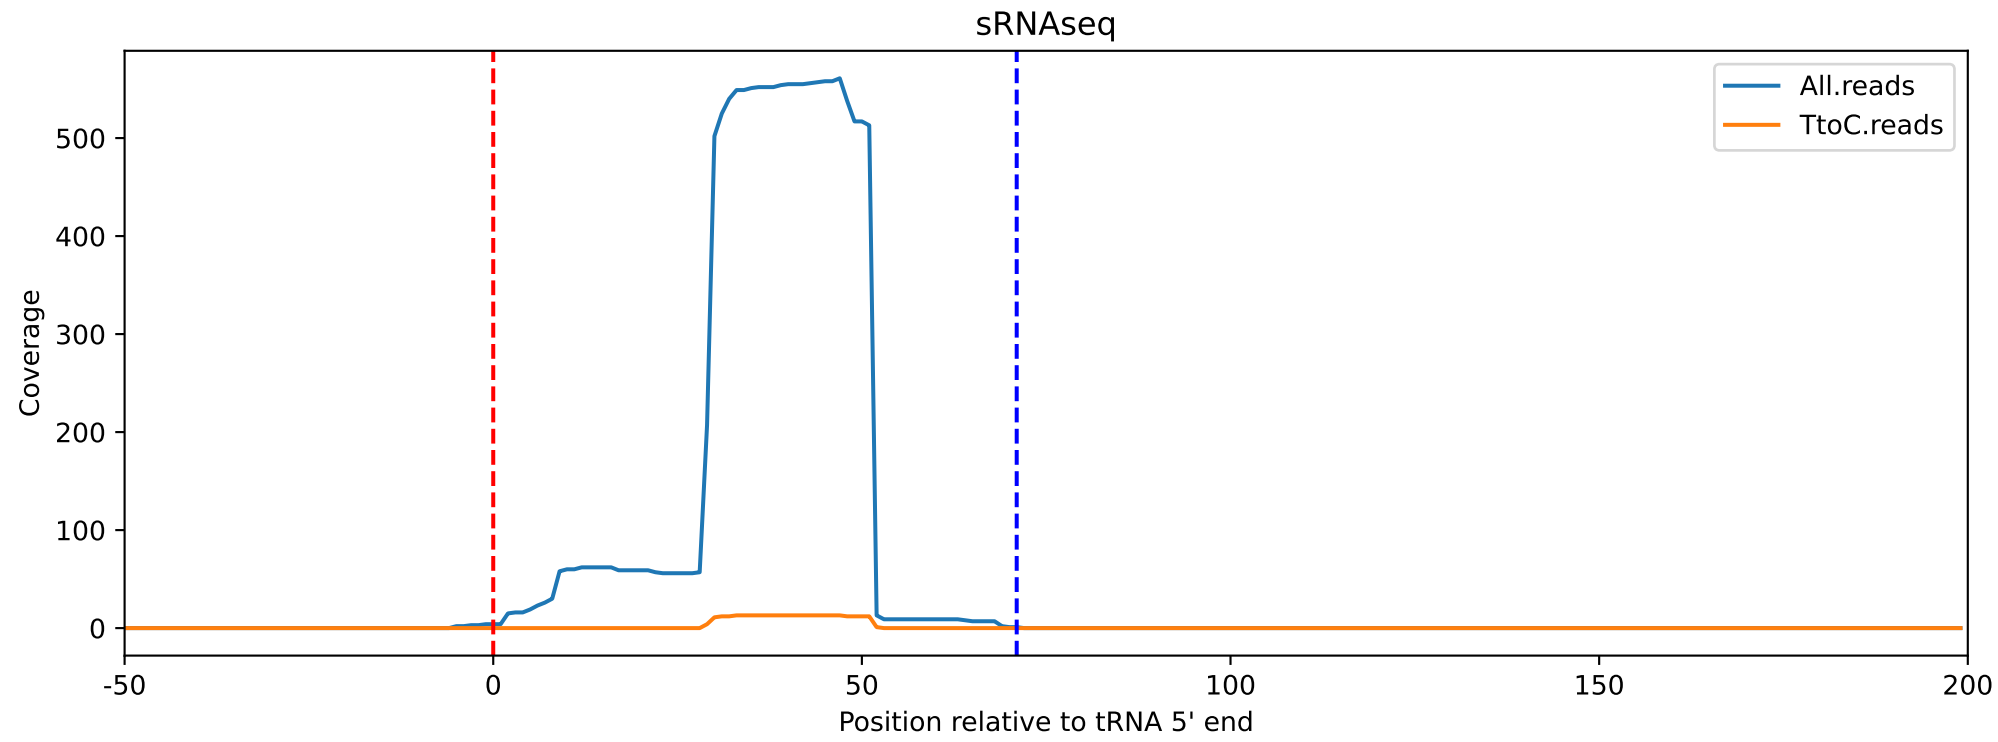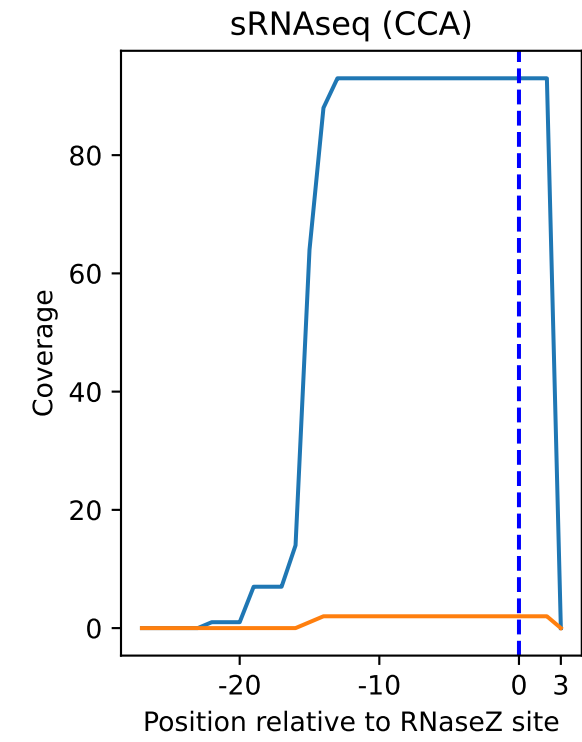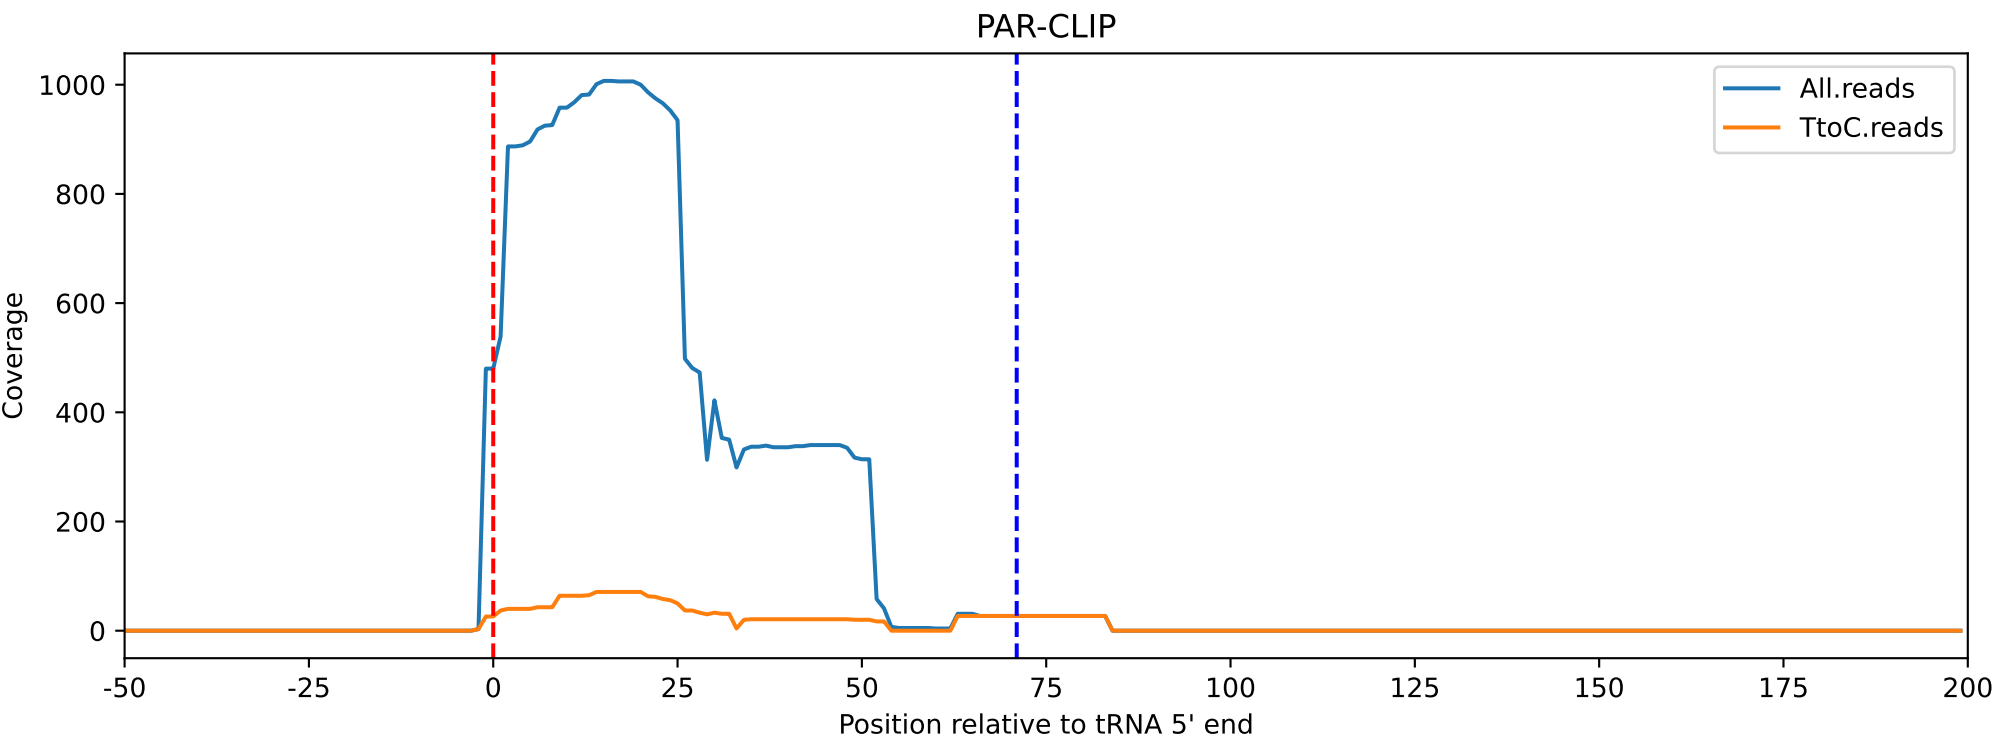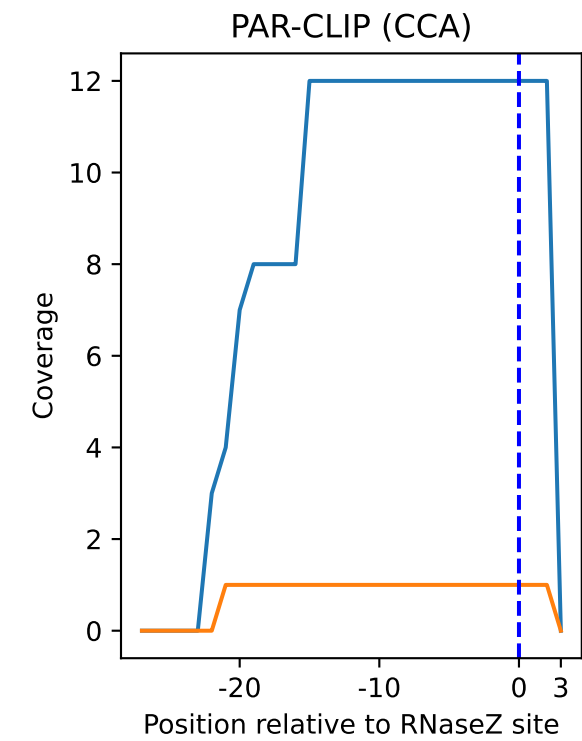

# tRNA-Ile-AAT-1-1

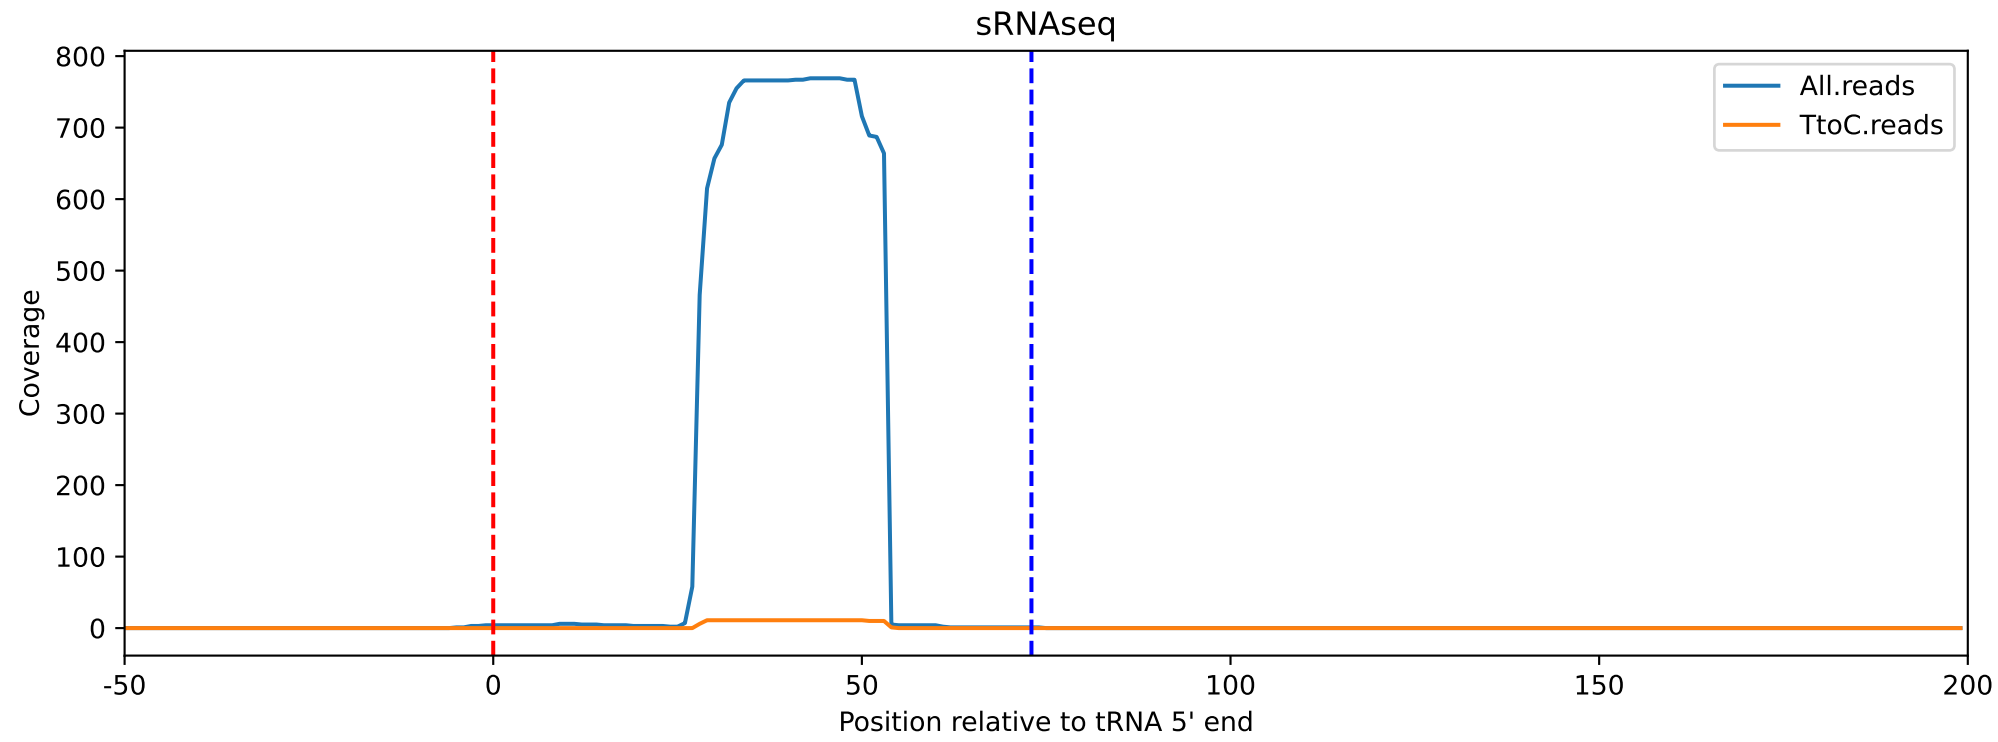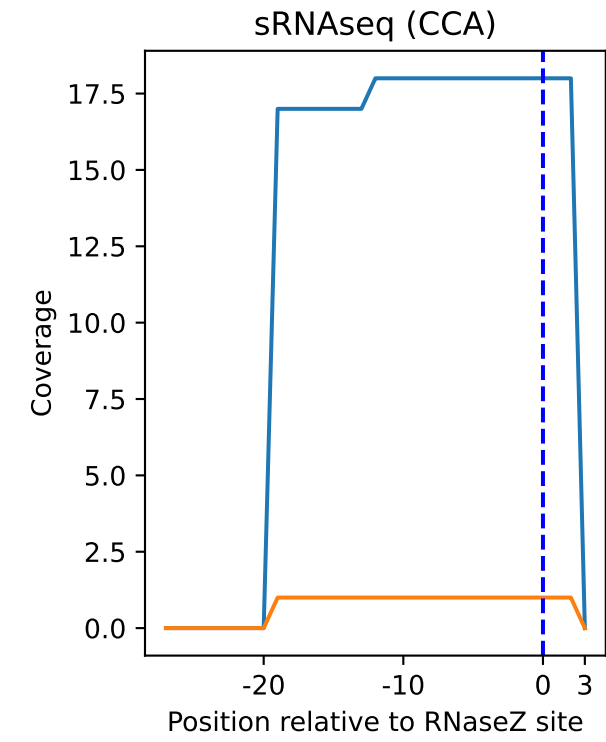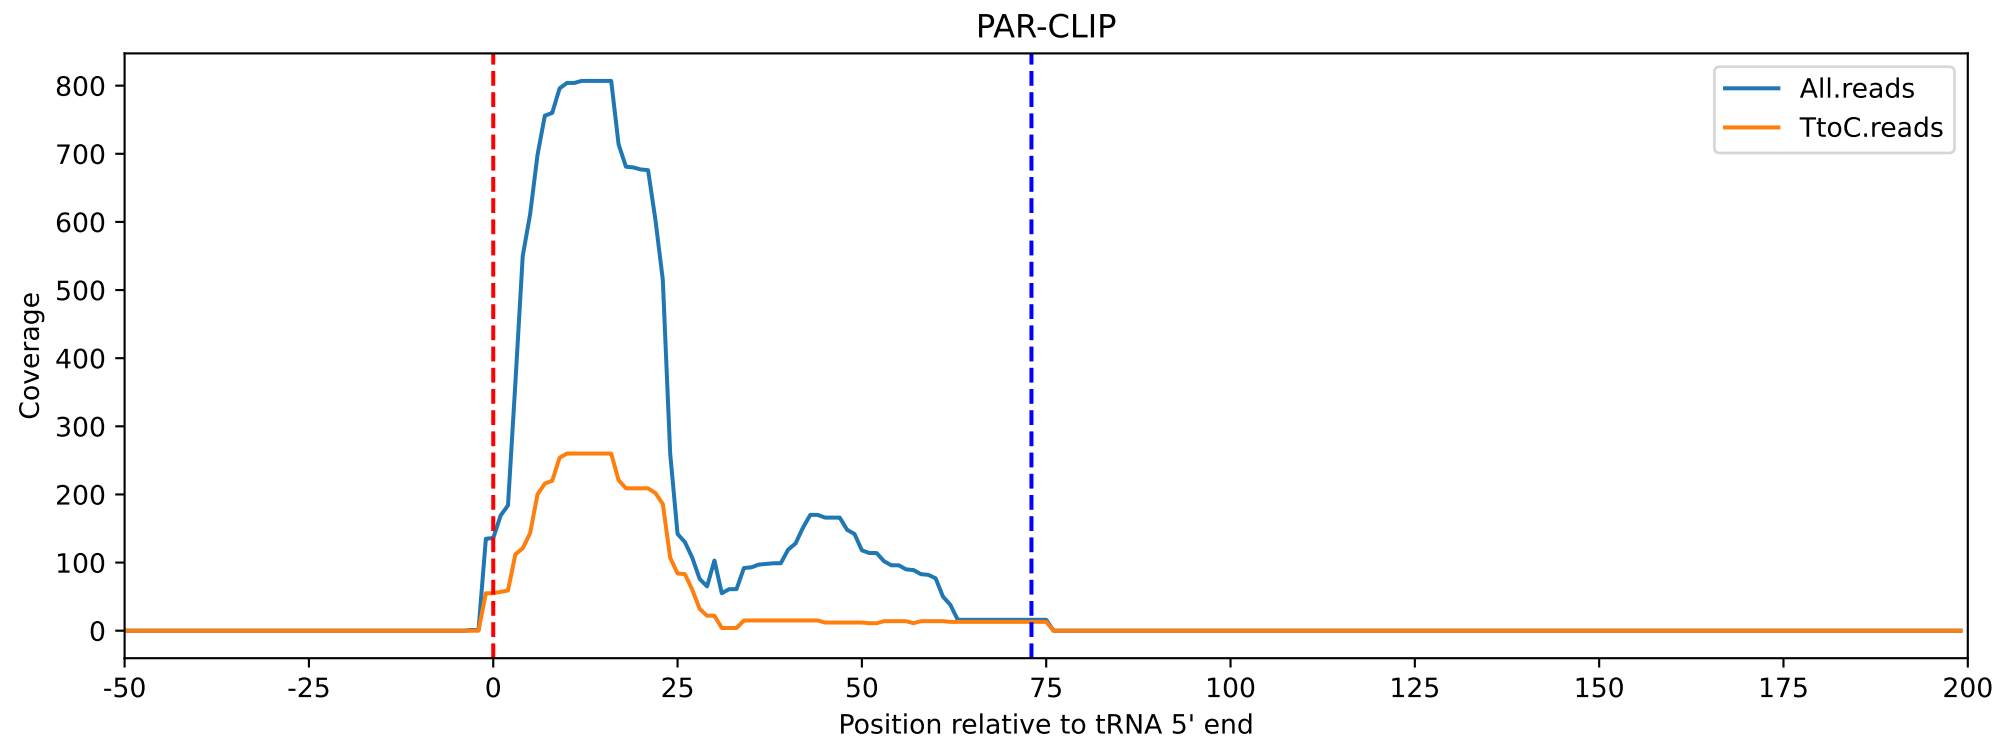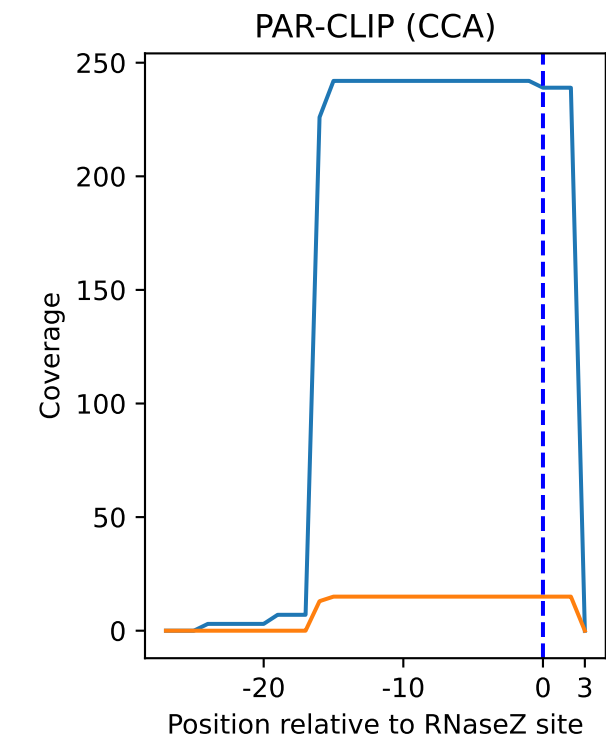

# tRNA-Leu-TAA-1-1

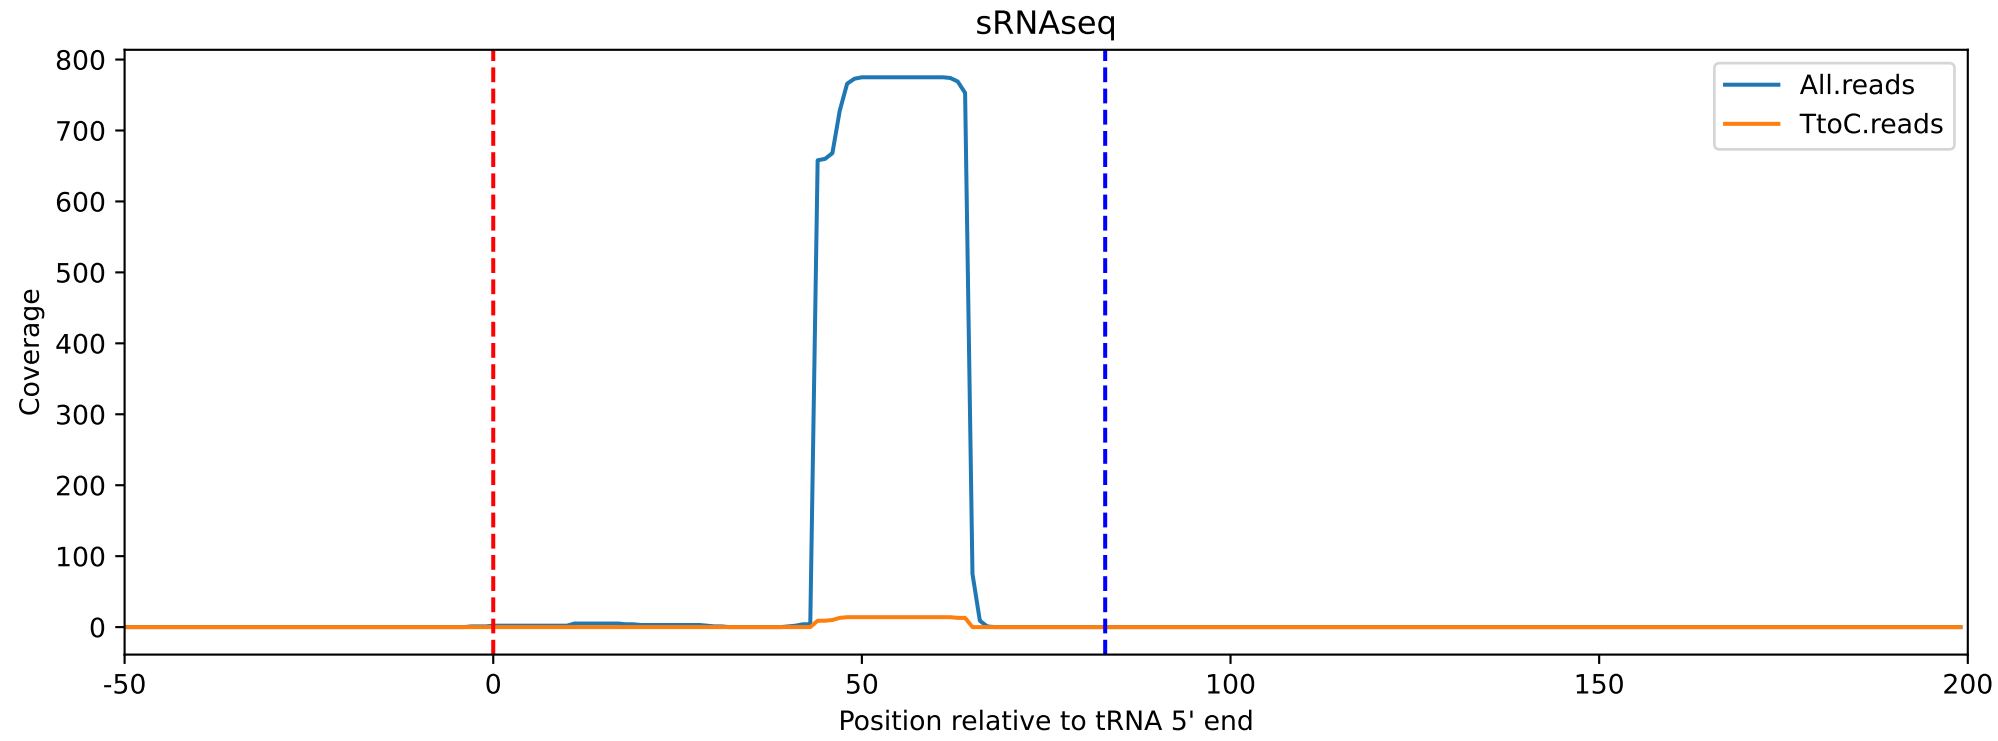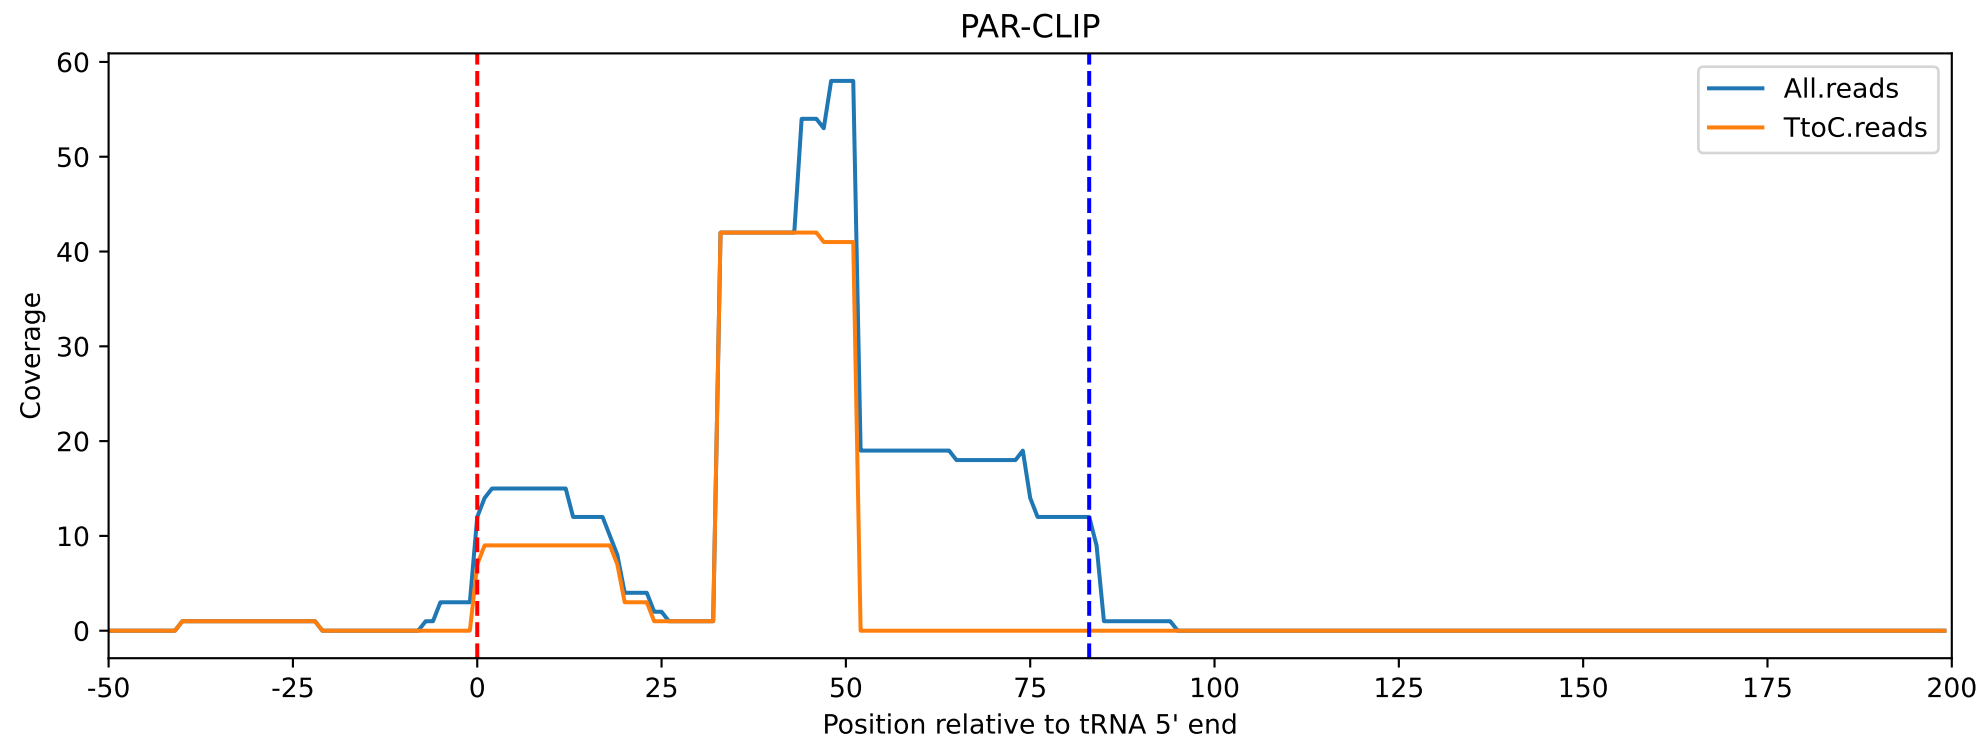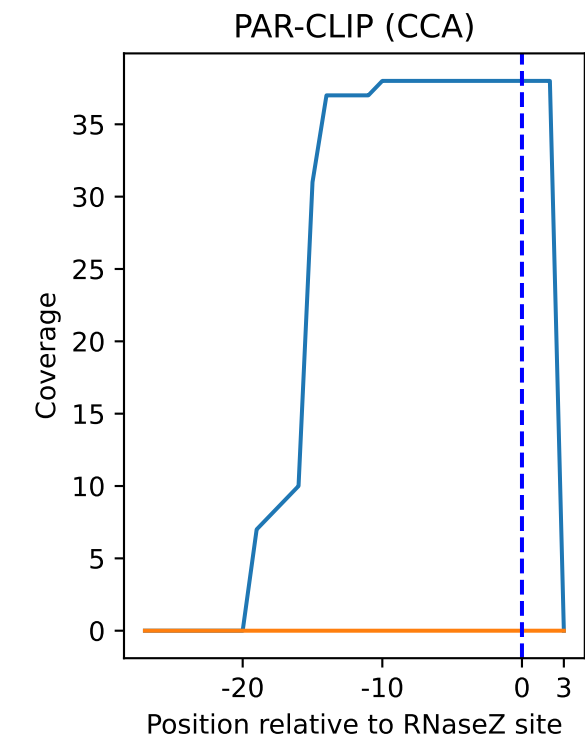

# tRNA-Cys-GCA-4-1

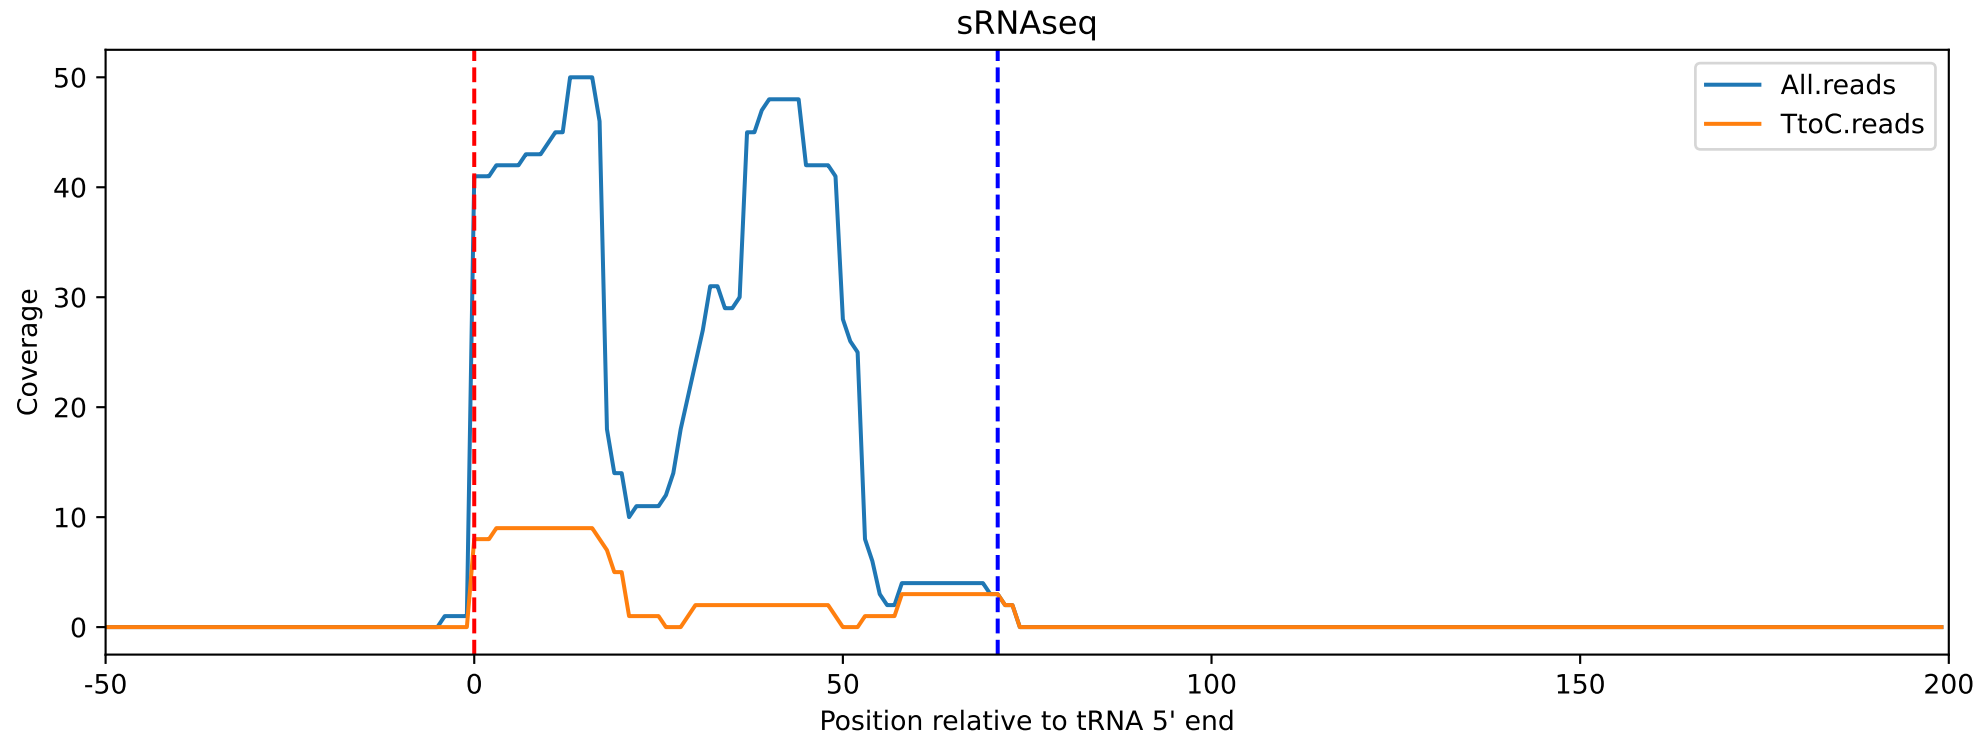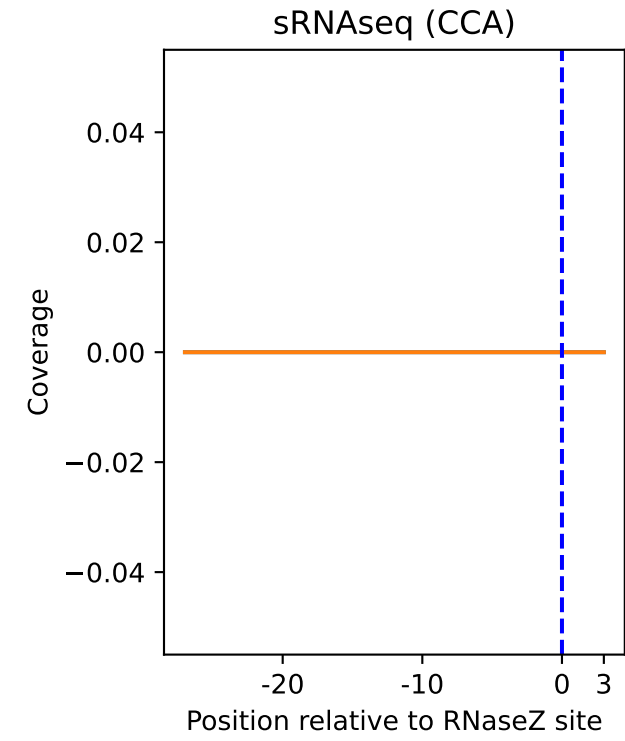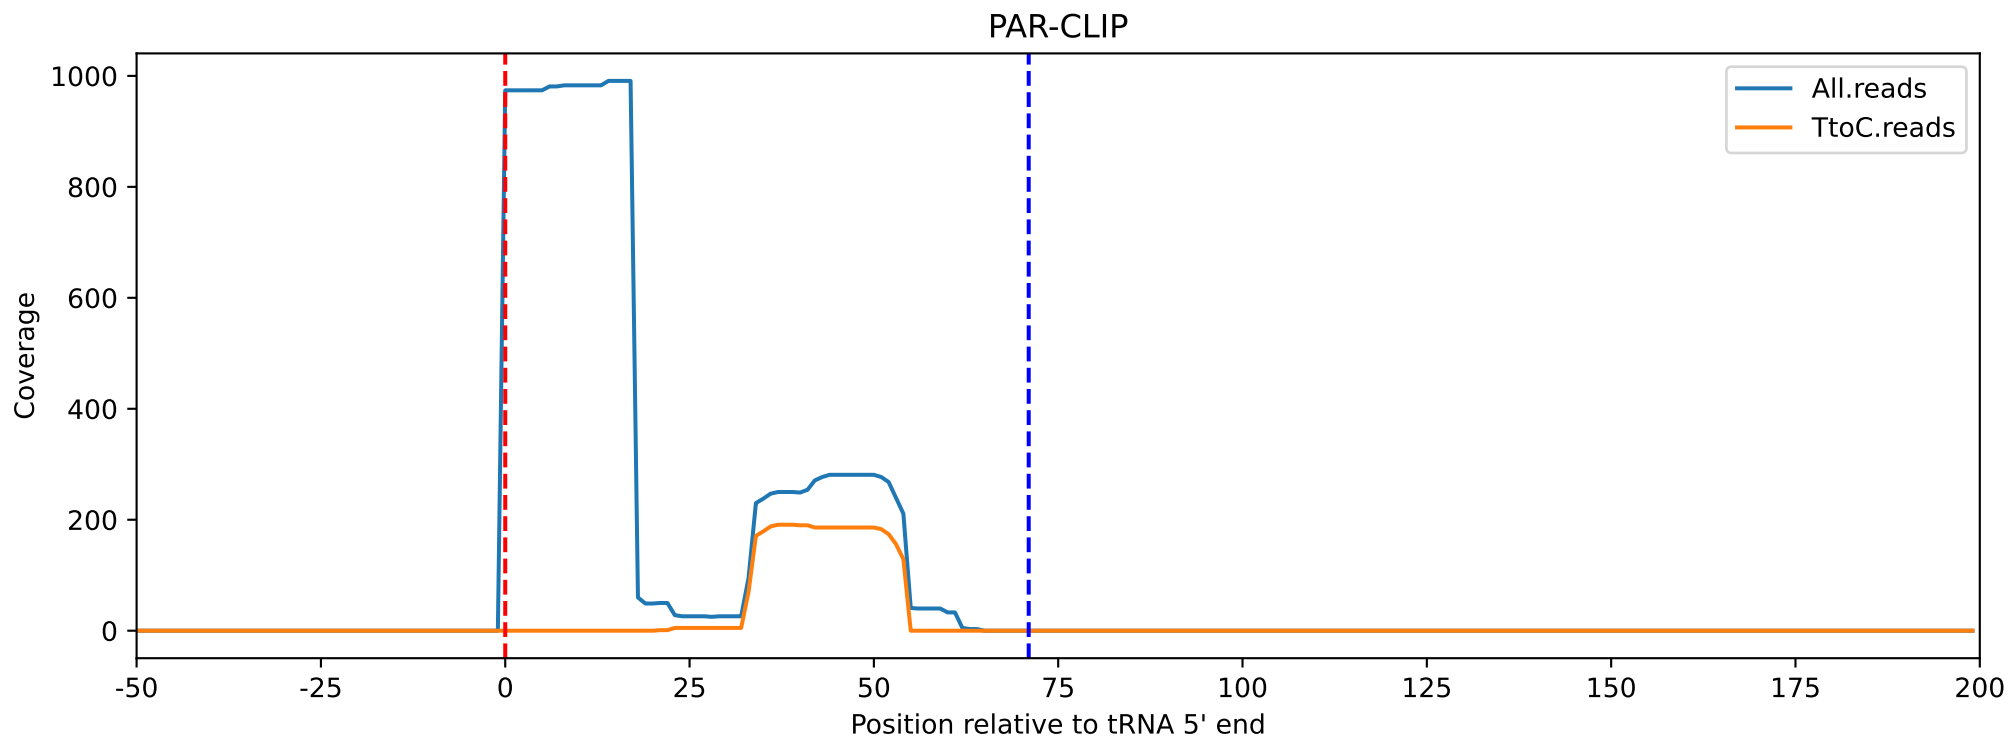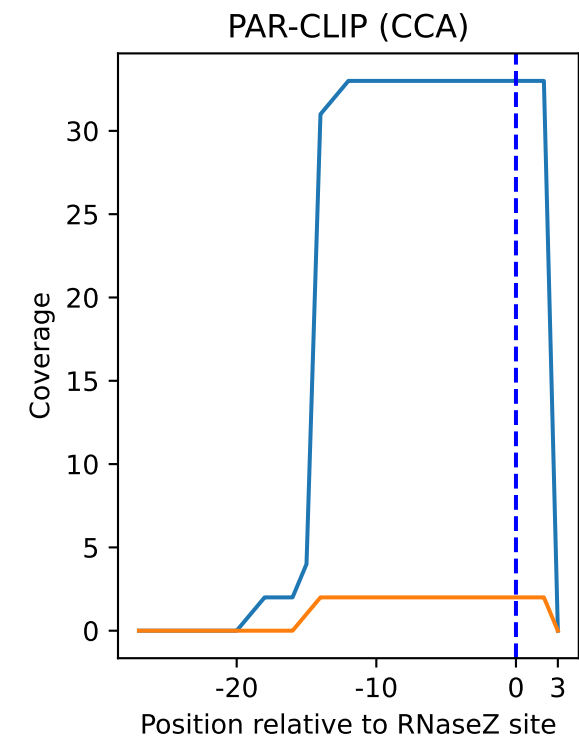

# tRNA-Gln-CTG-2-4

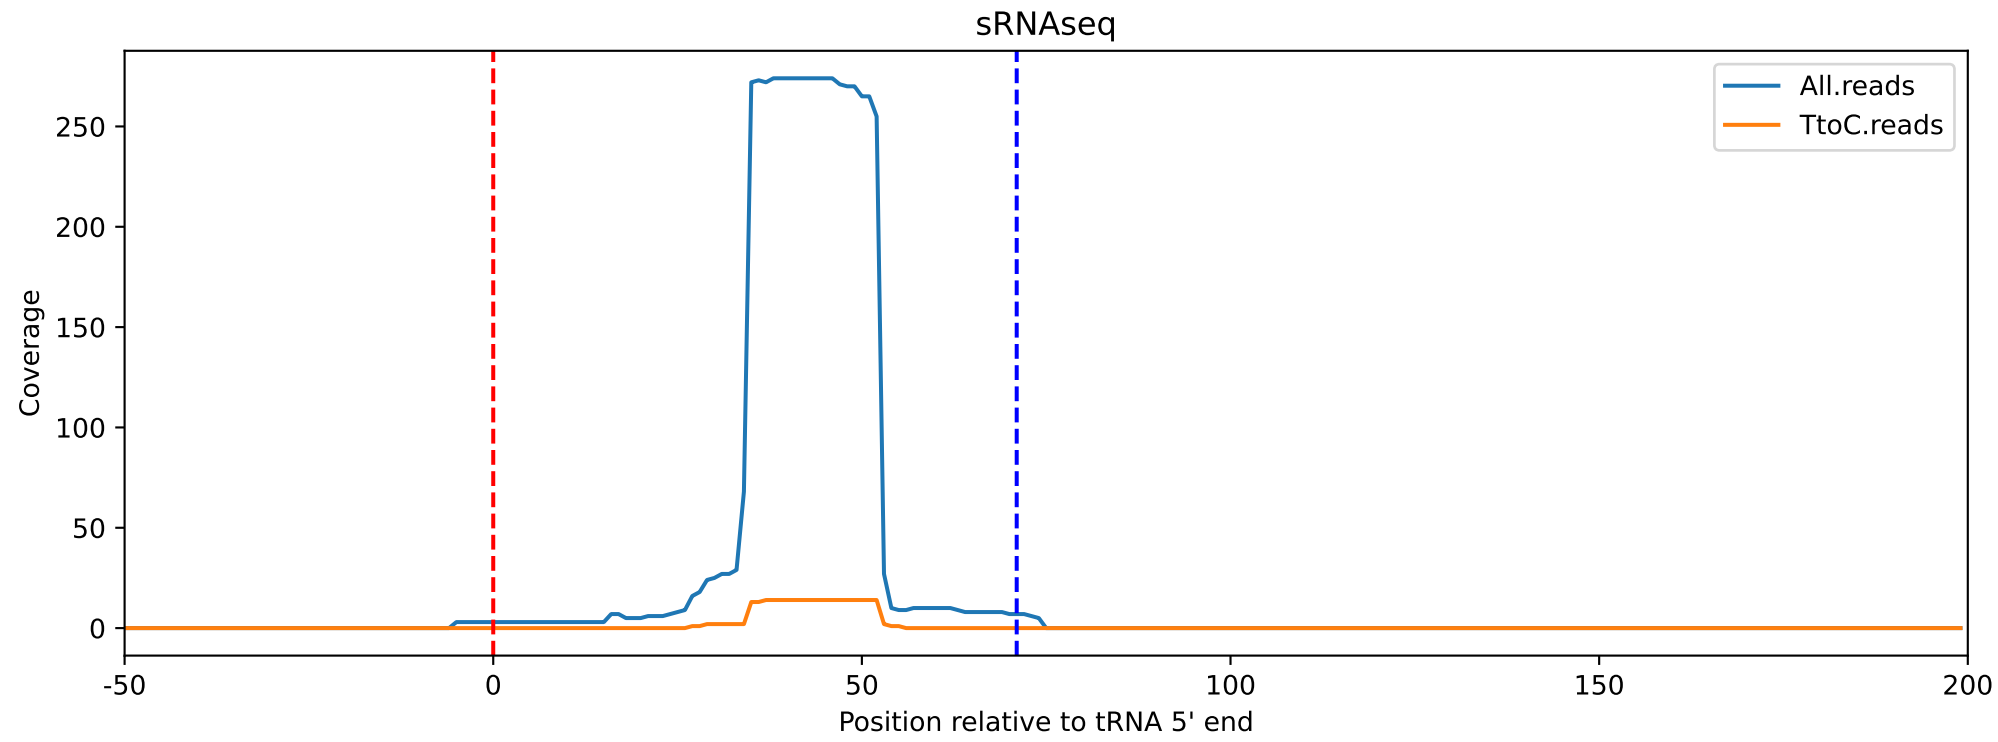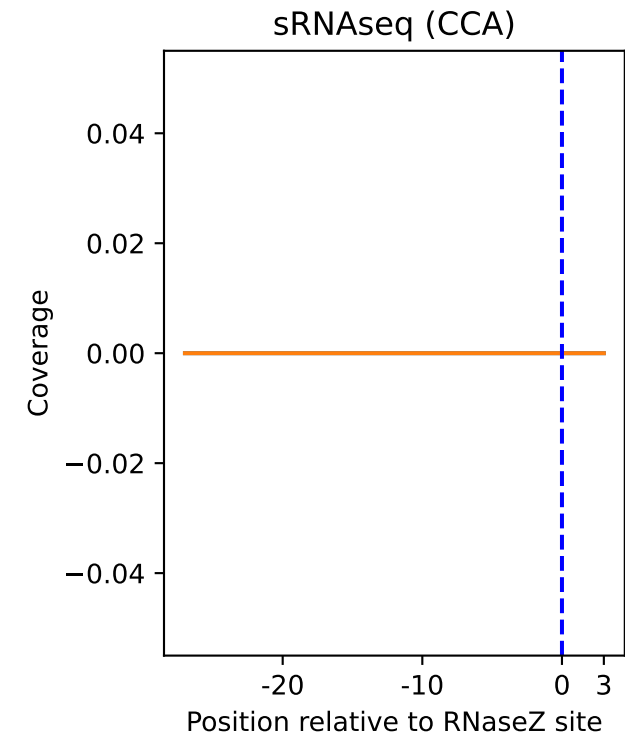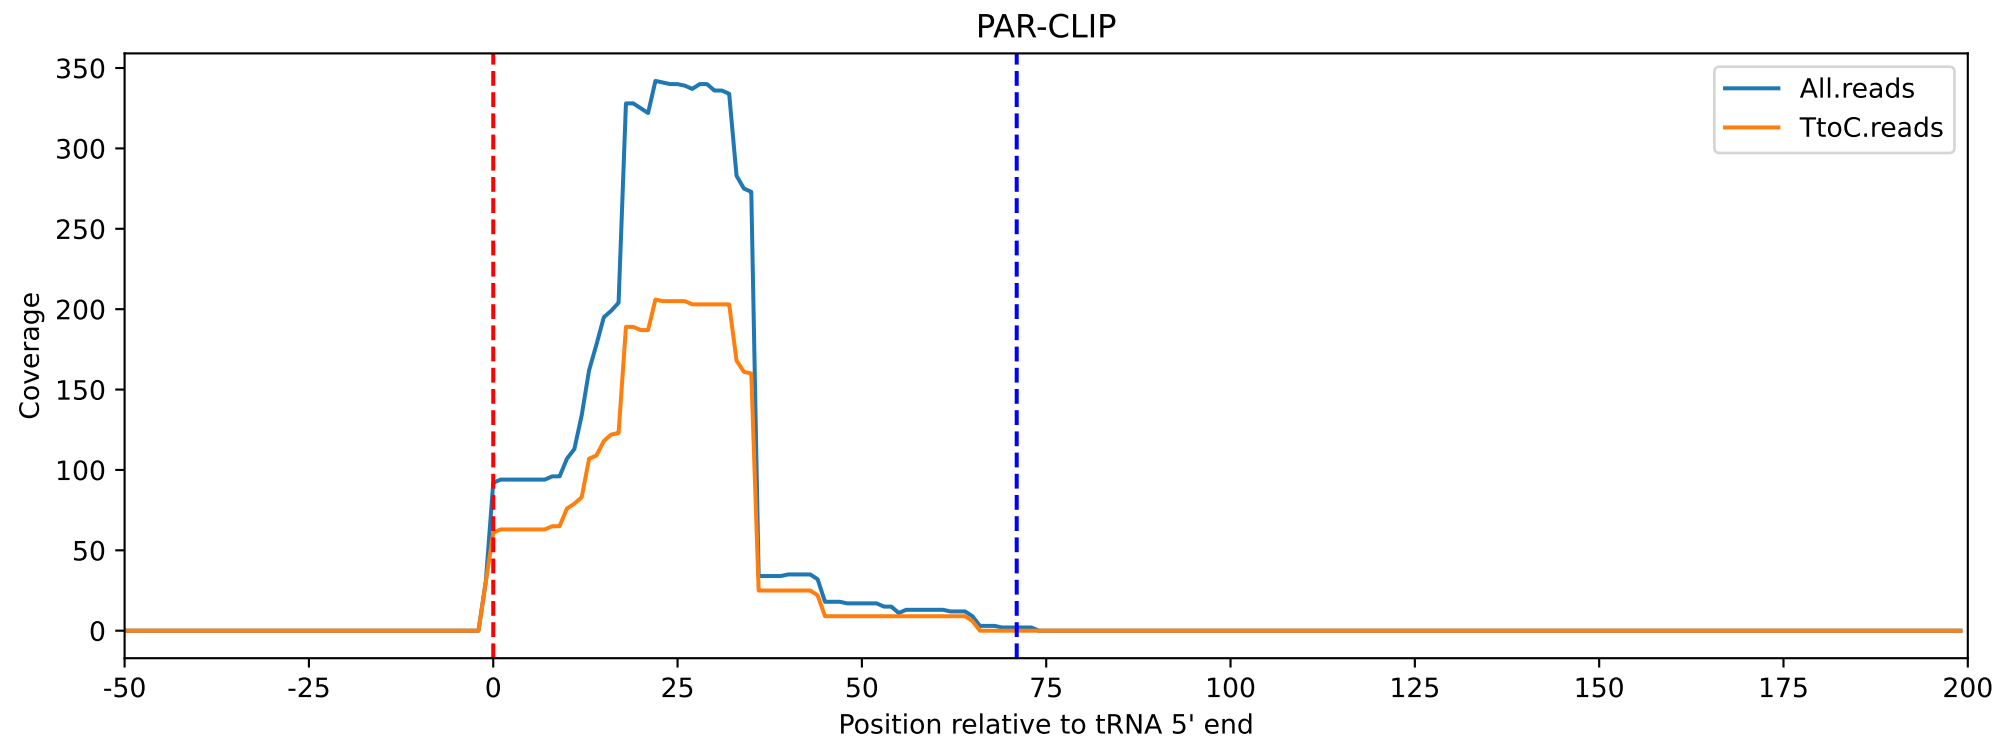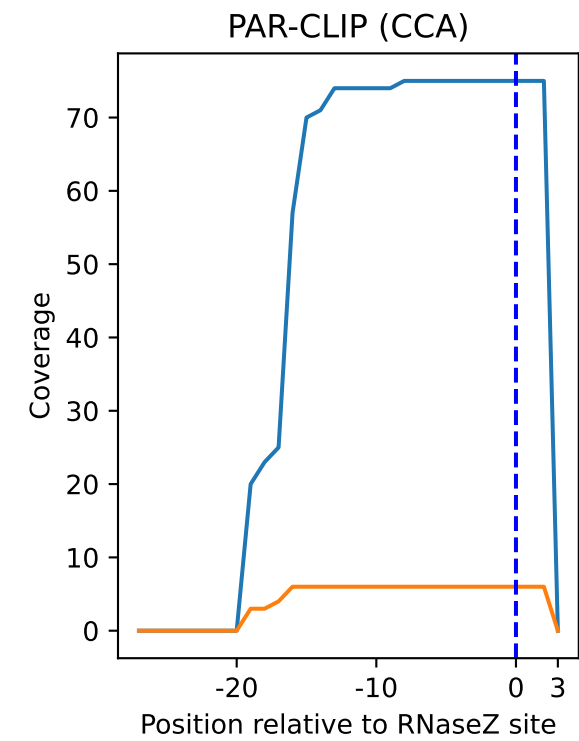

# tRNA-Asp-GTC-1-4

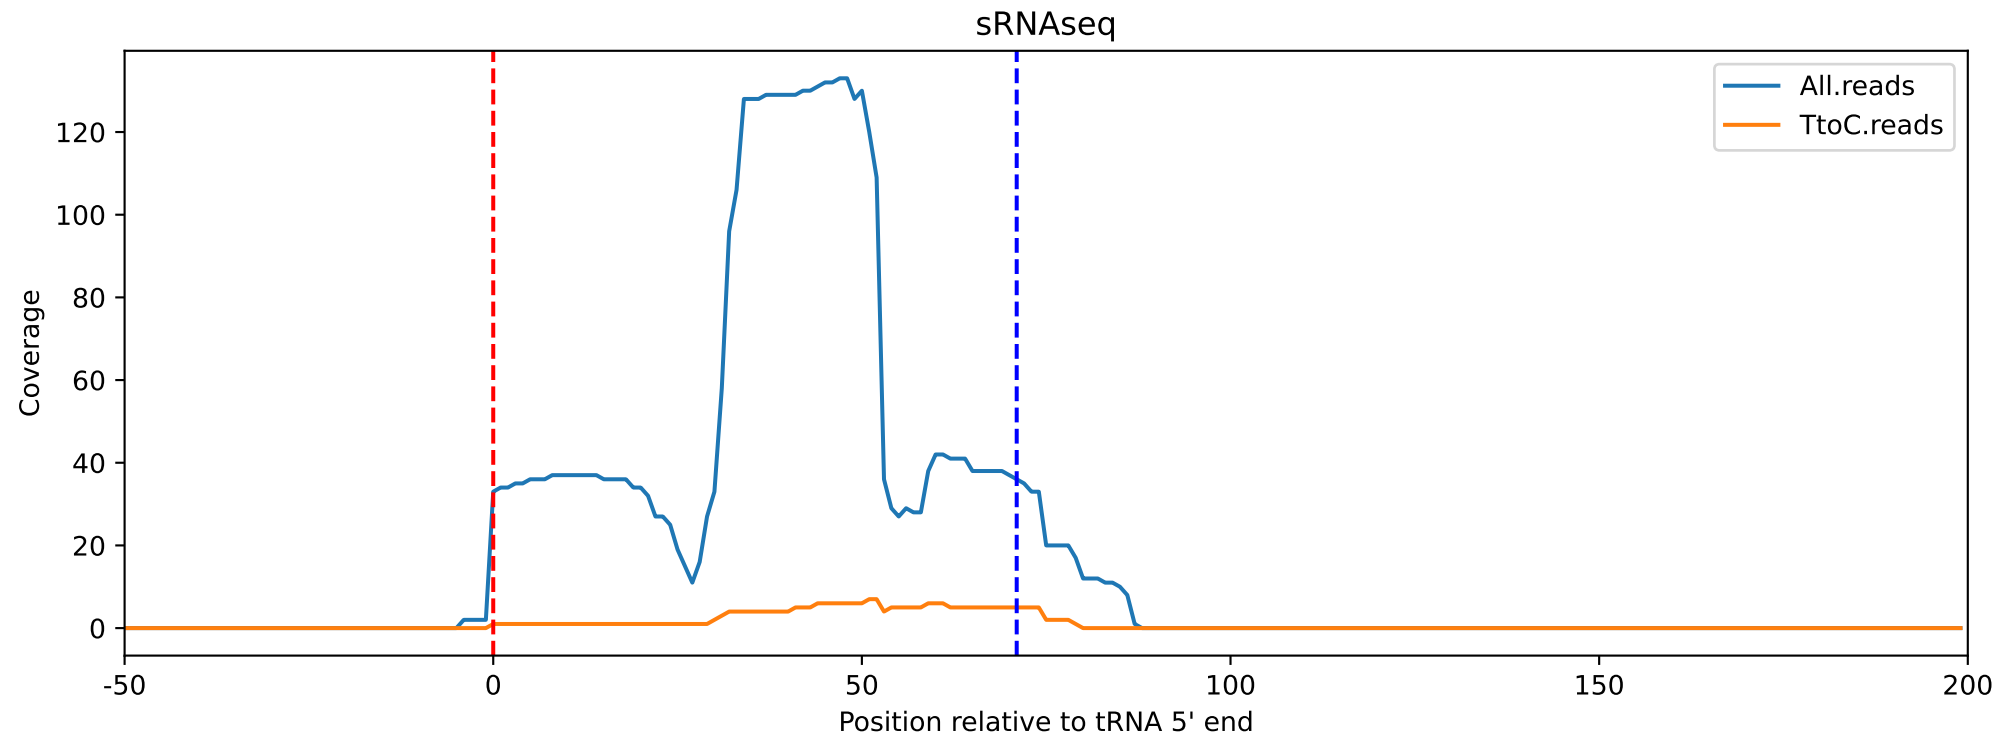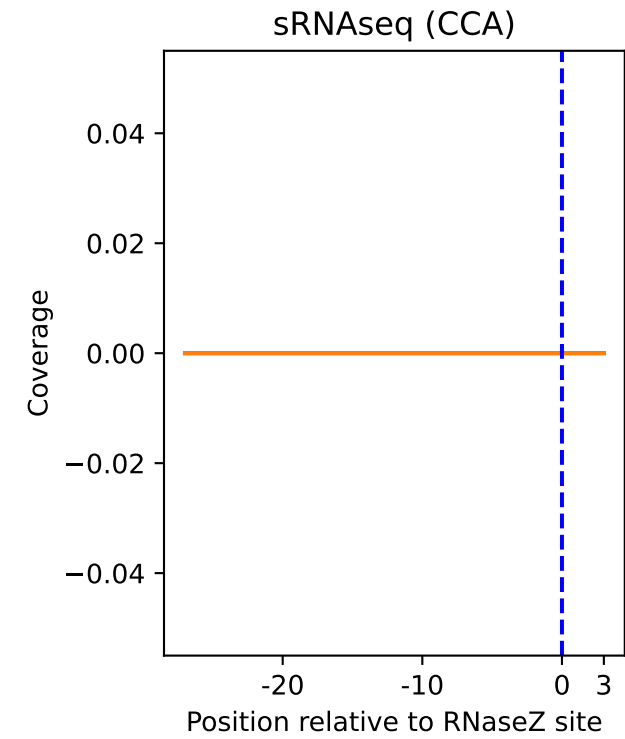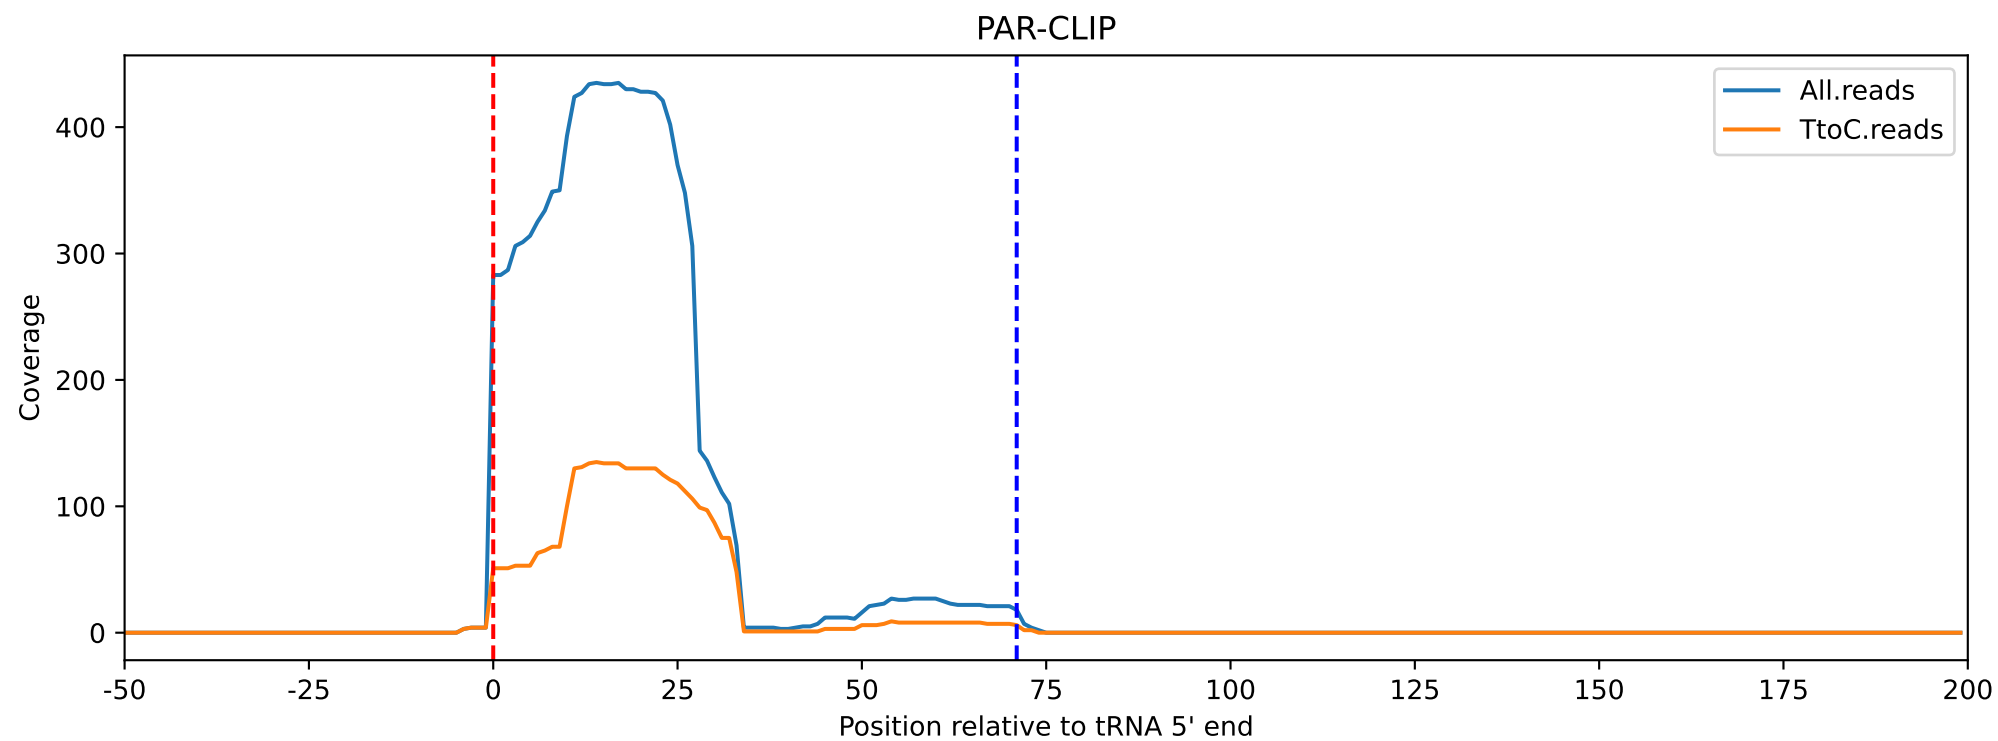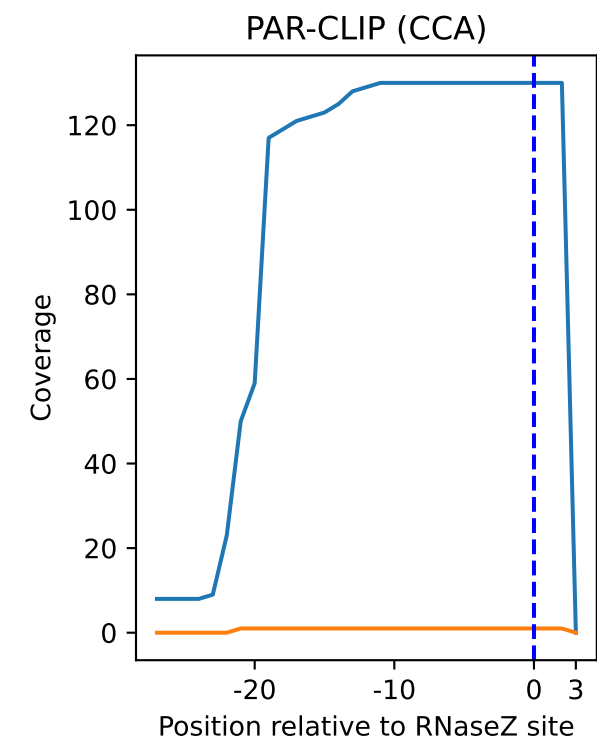



# tRNA-Ser-AGA-1-1

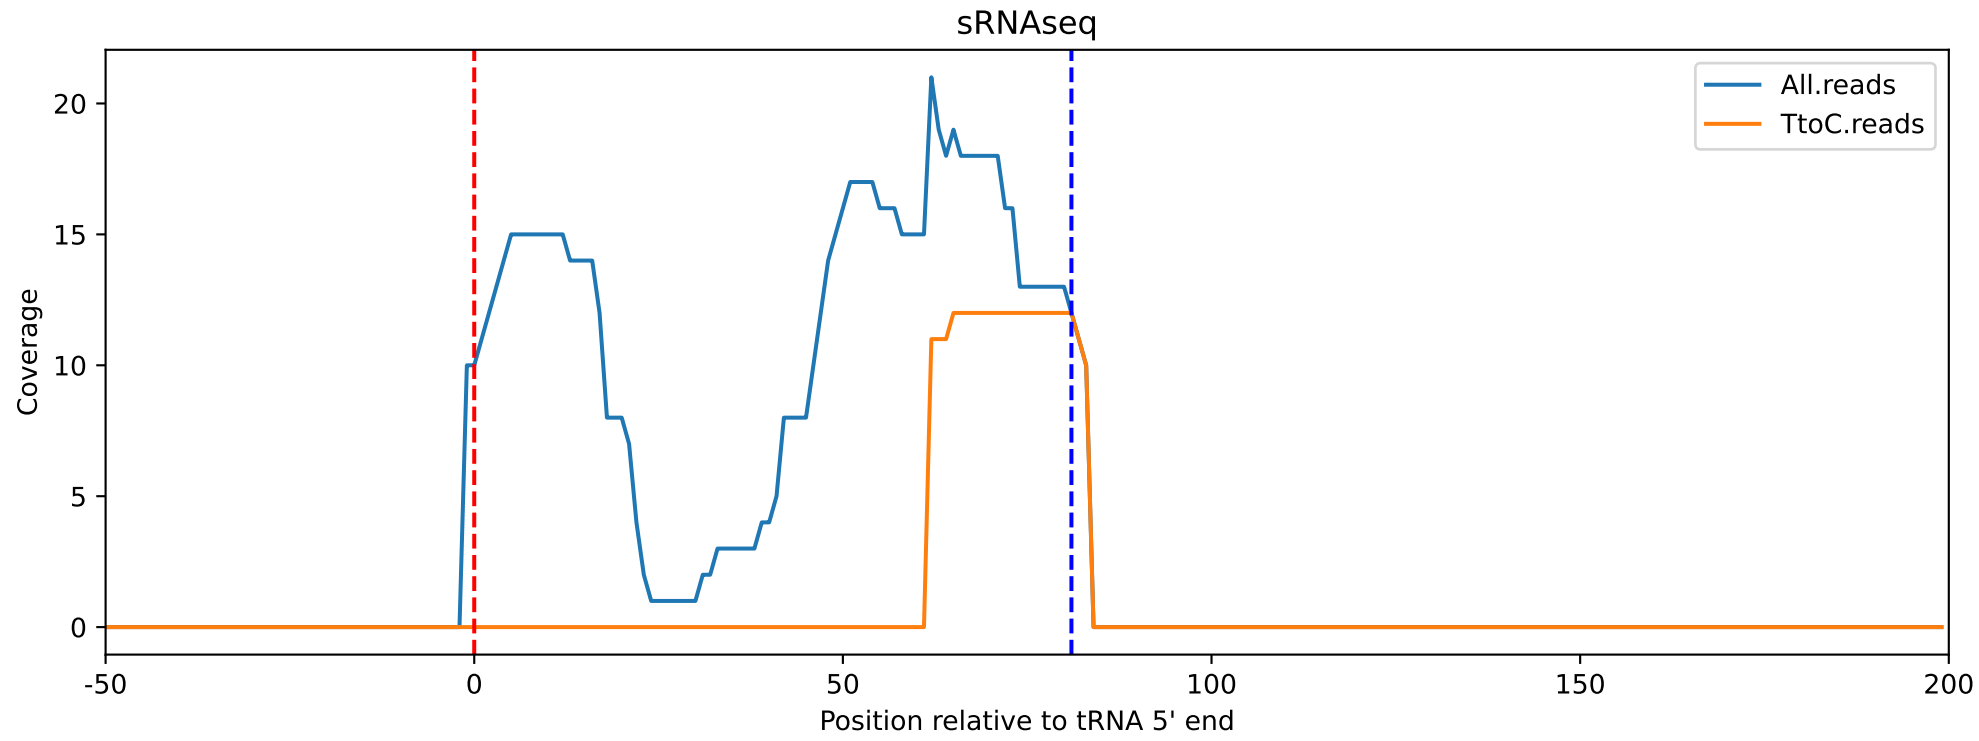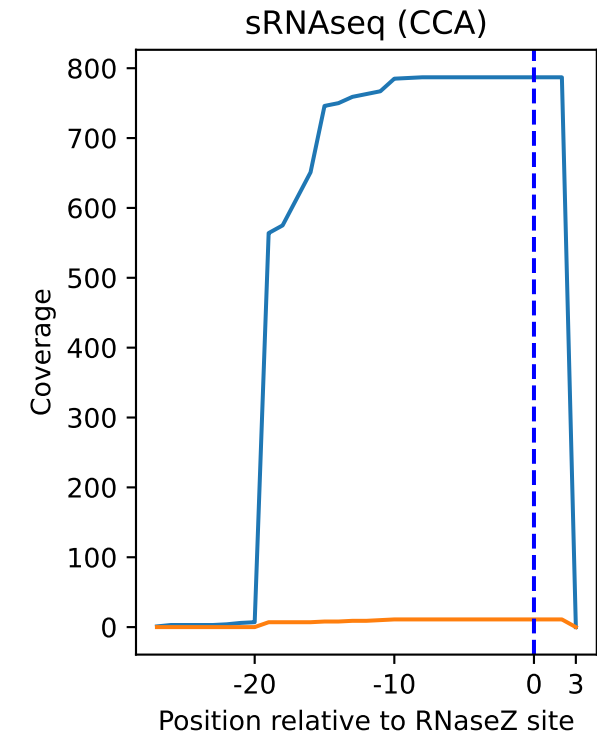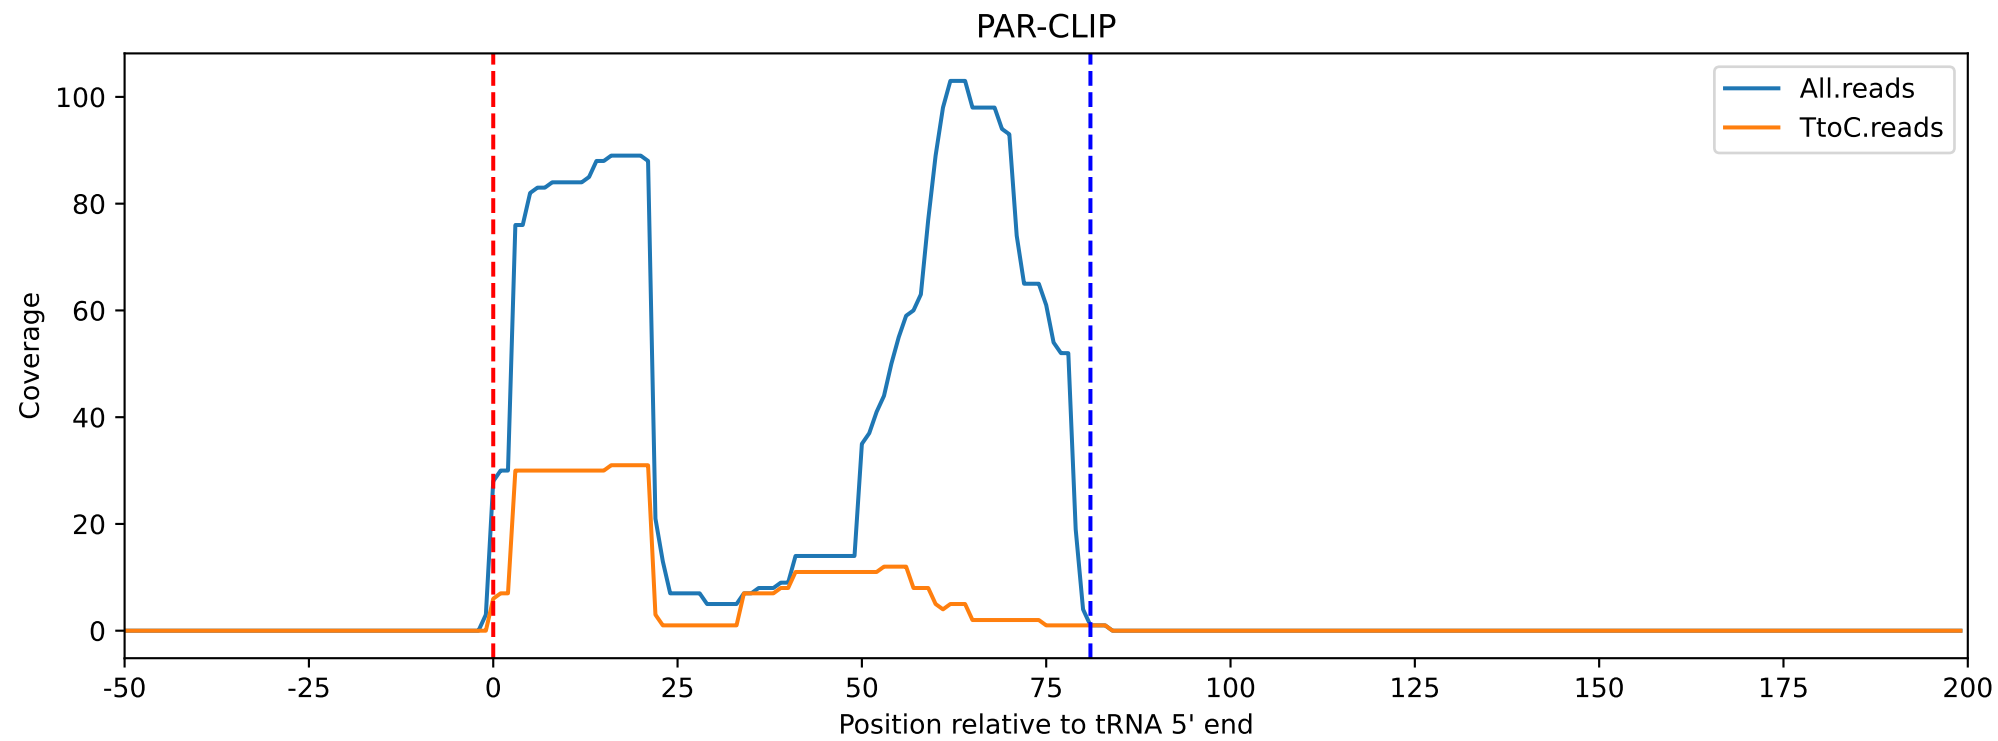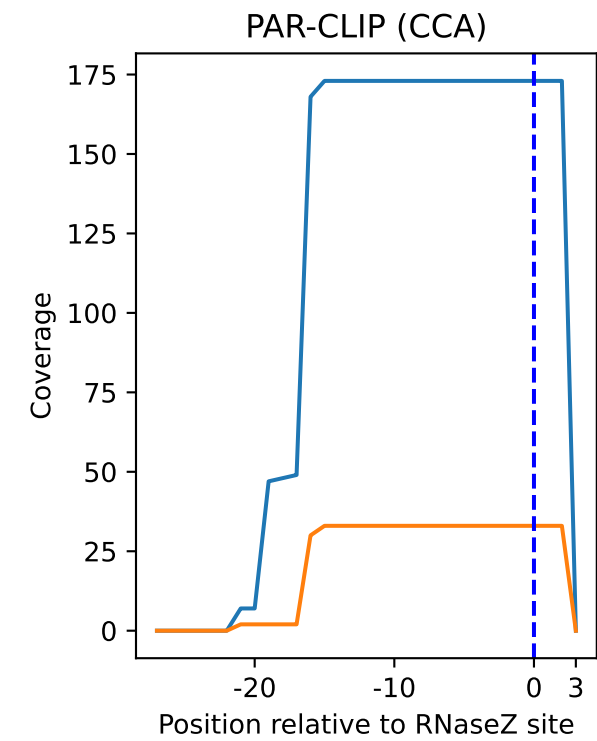

# tRNA-Leu-TAA-4-1

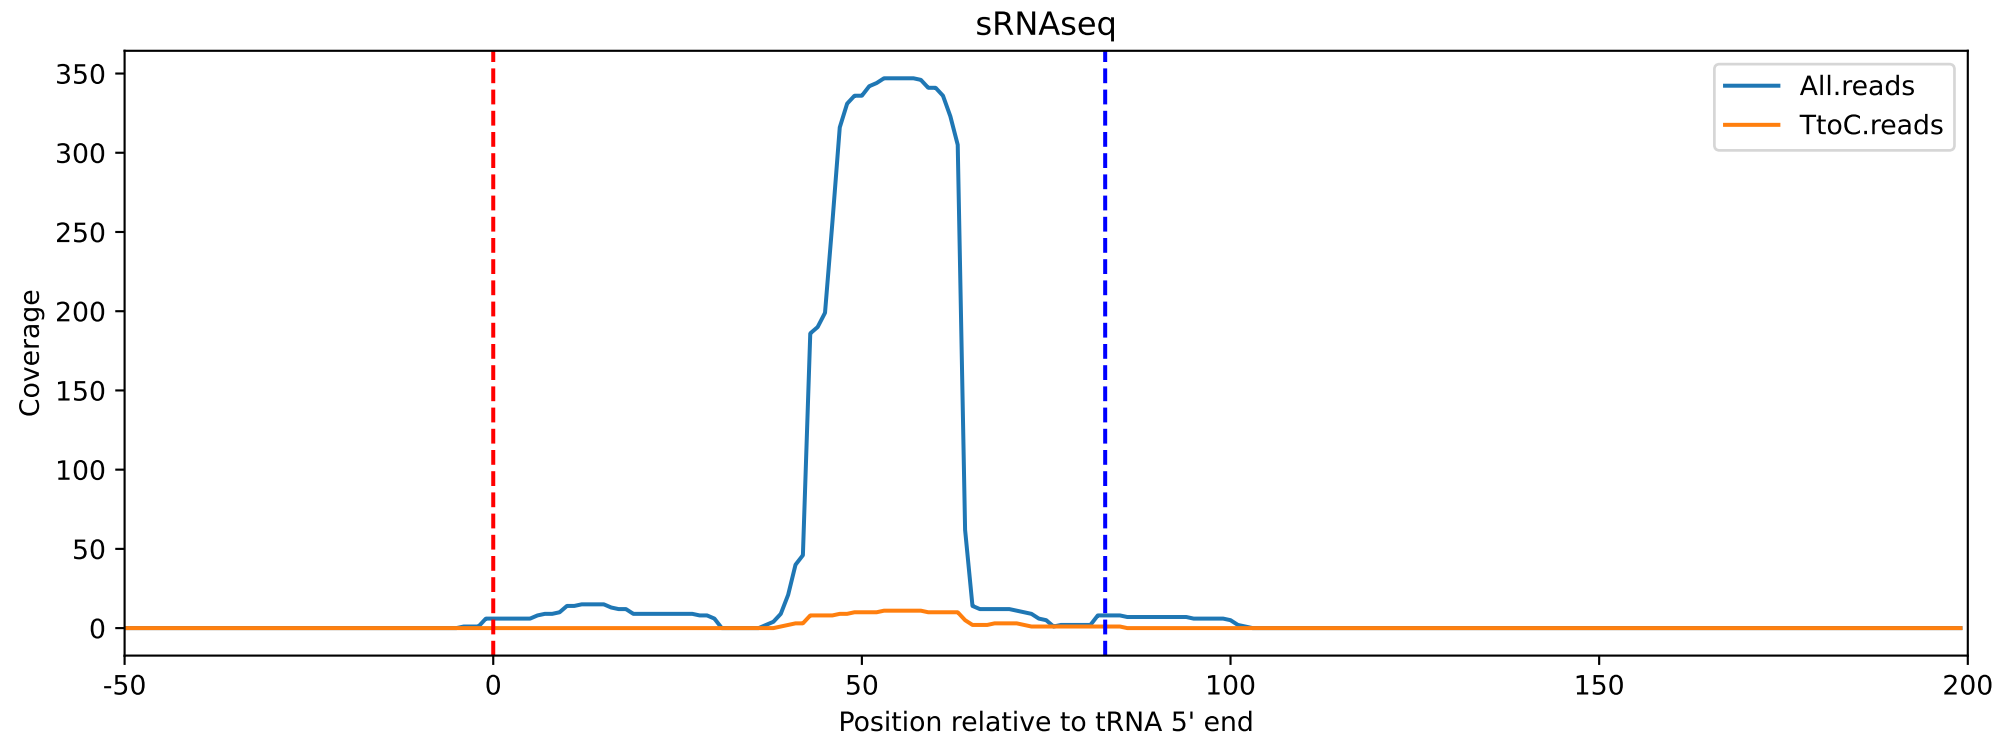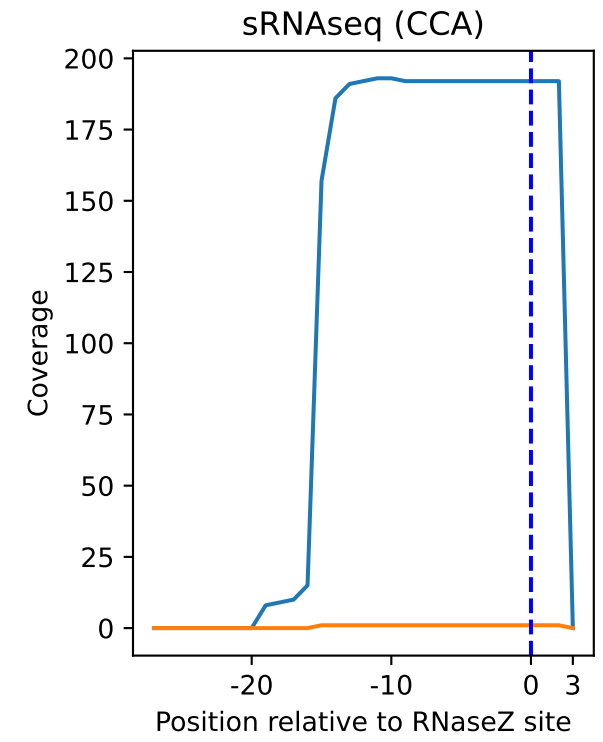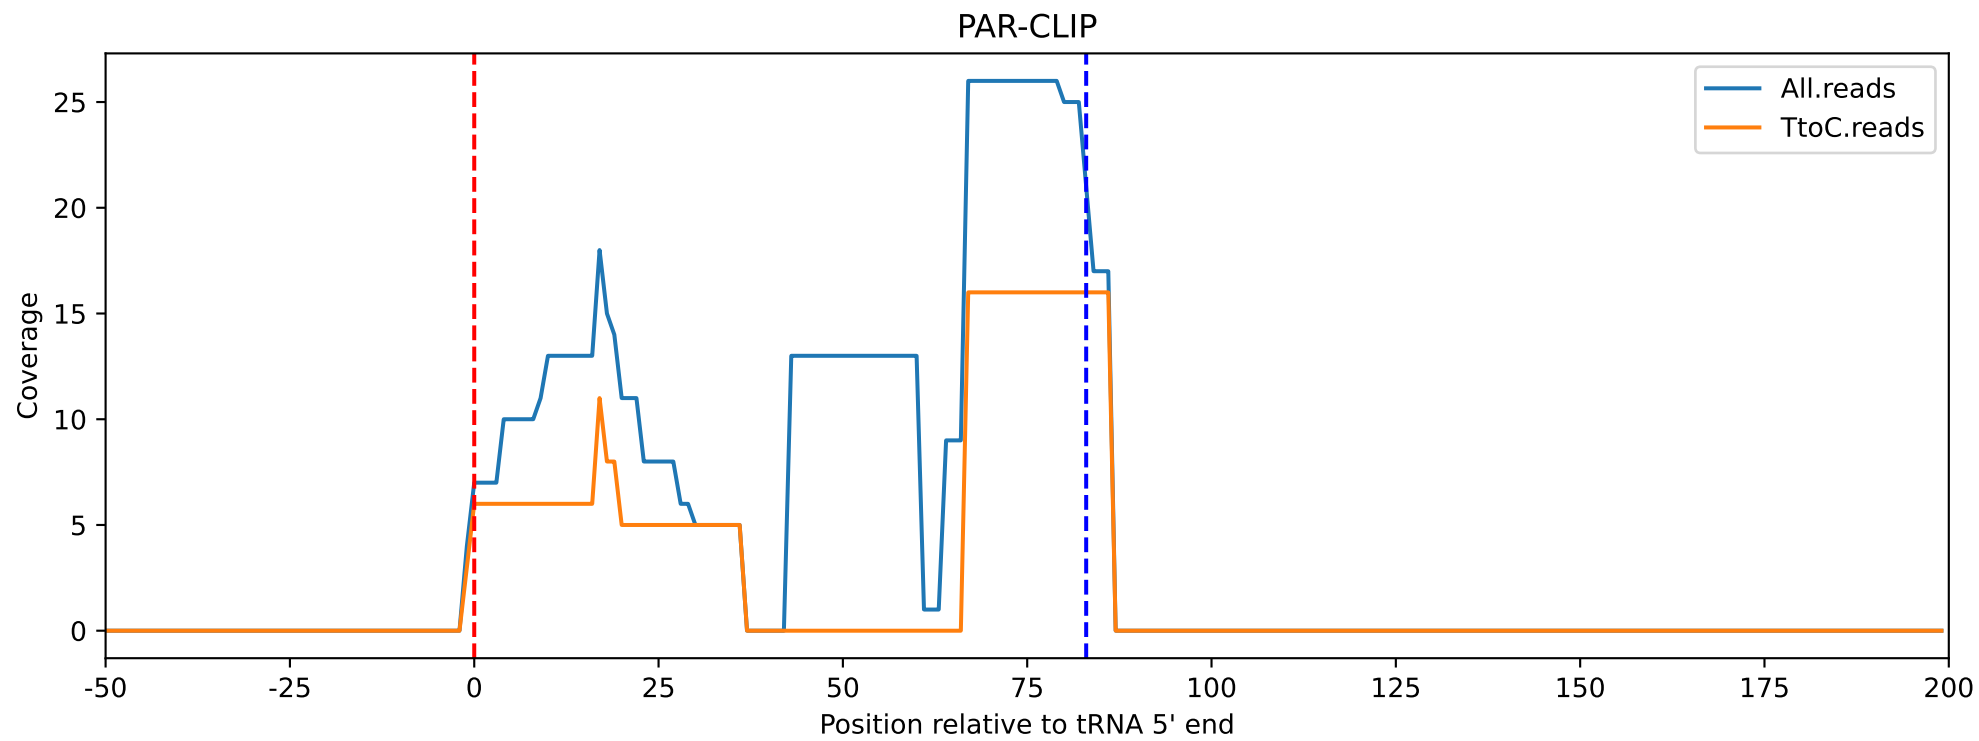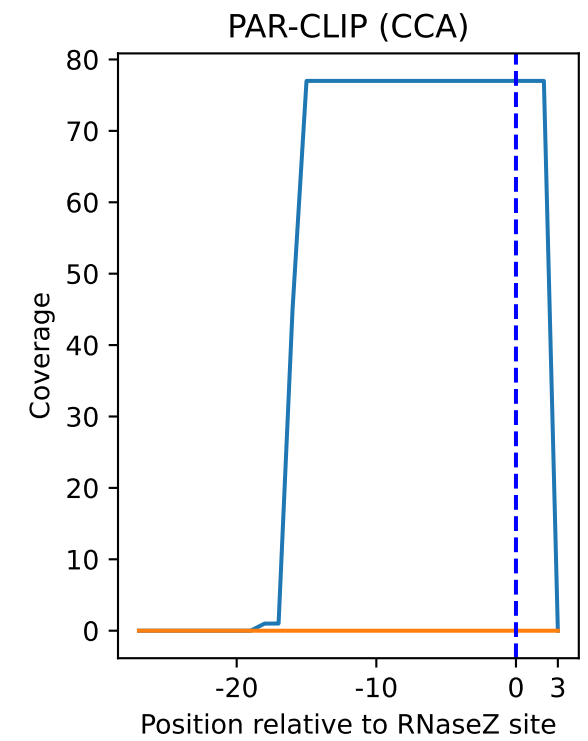

# tRNA-Gln-CTG-3-1

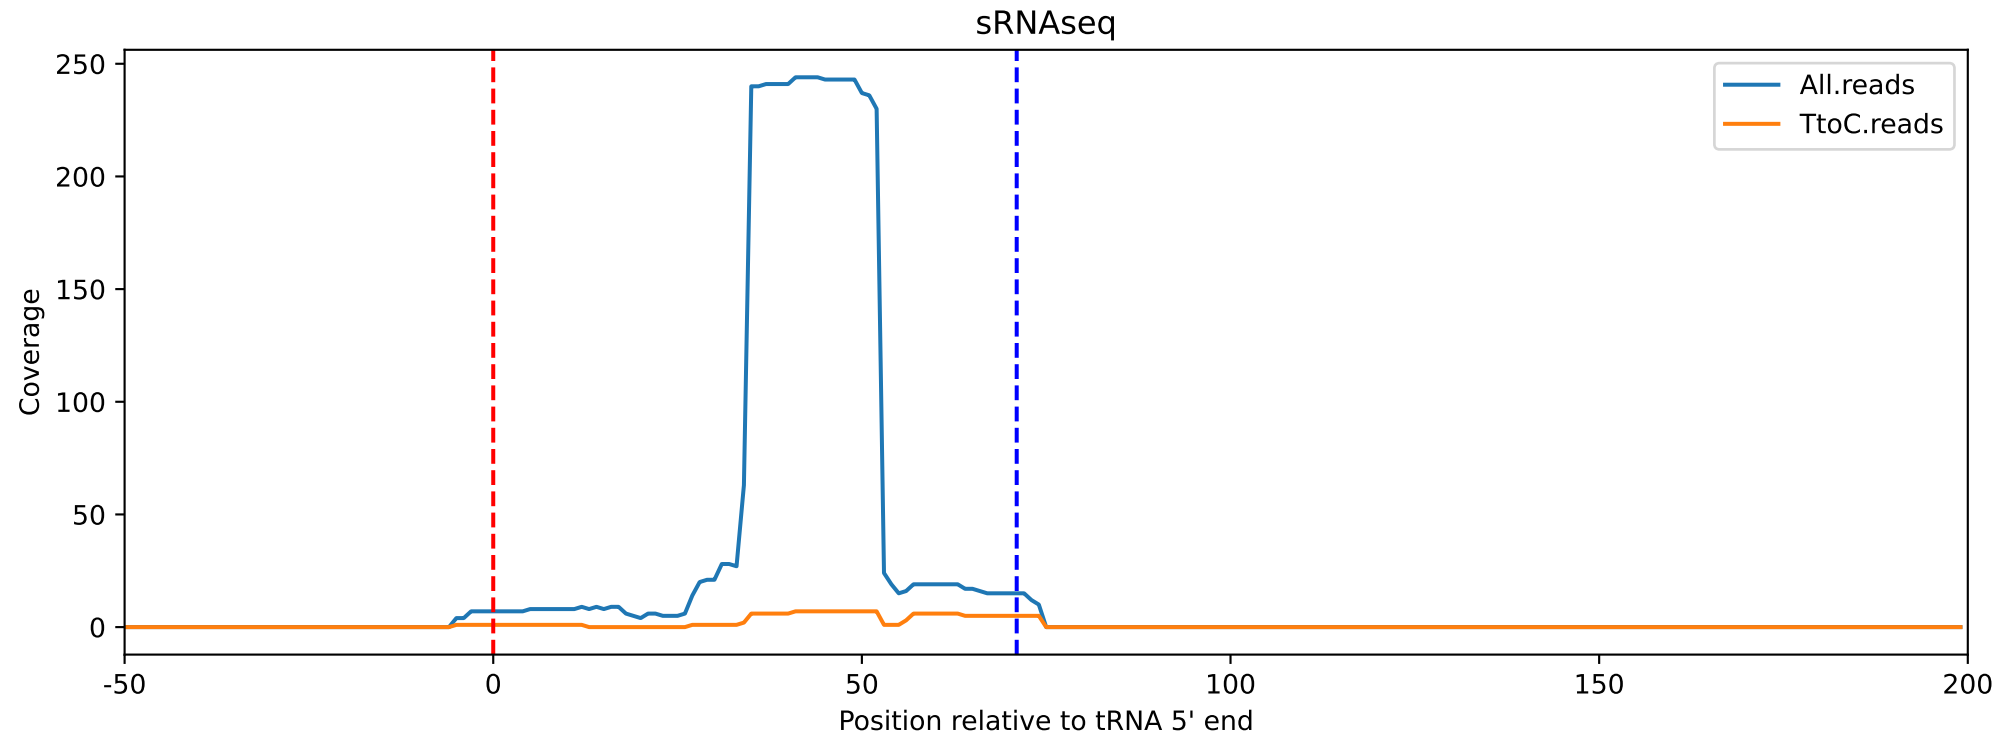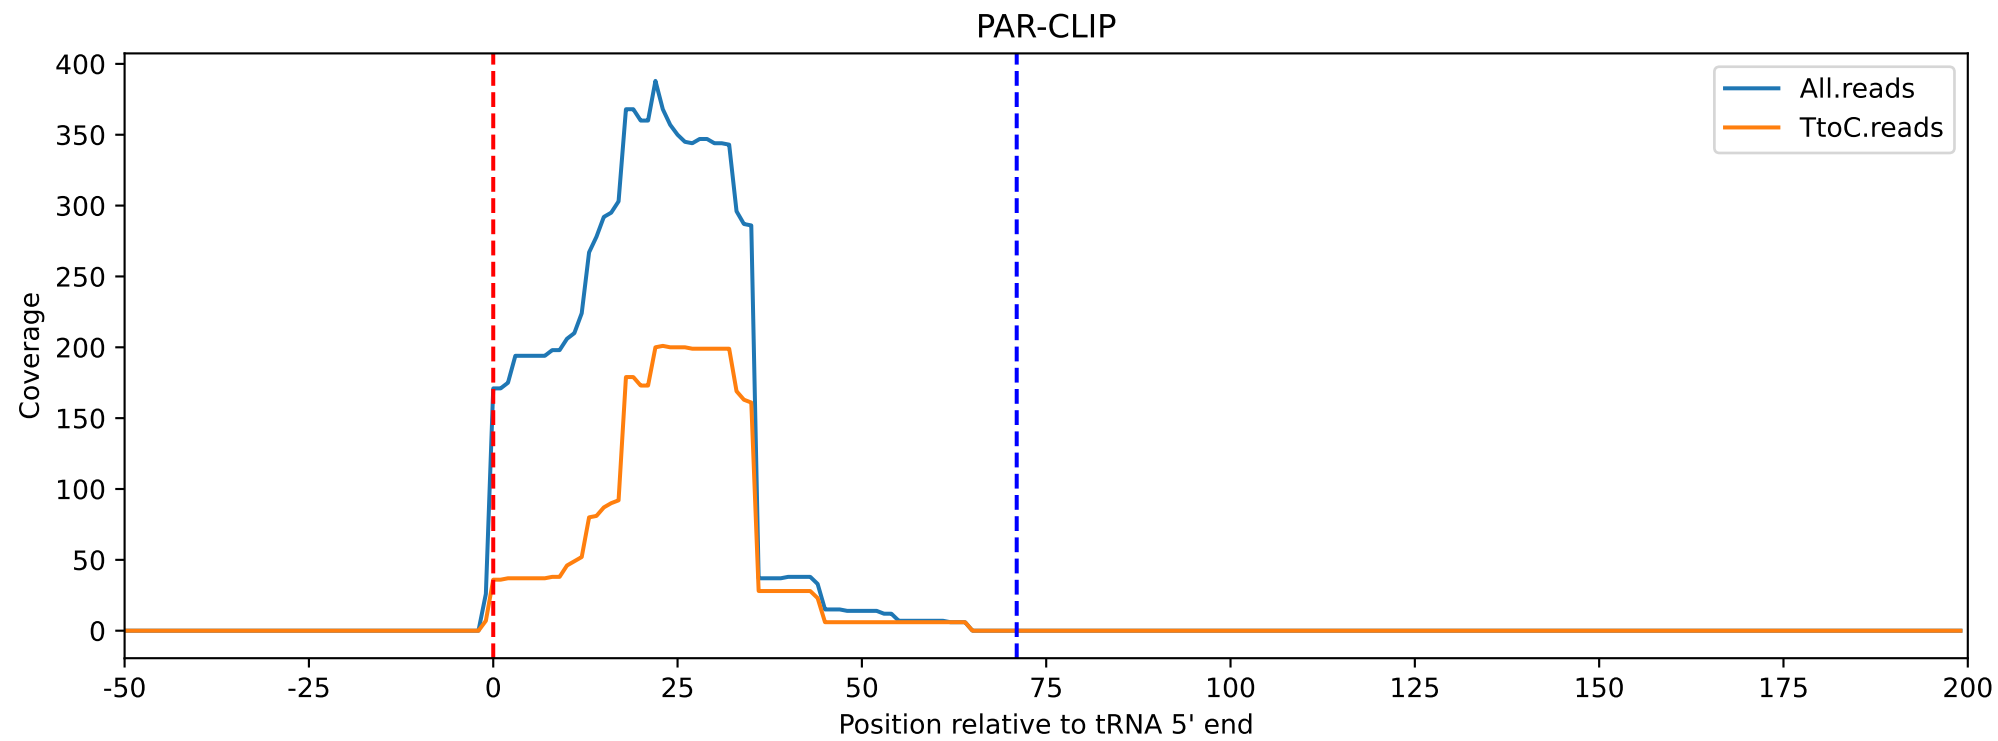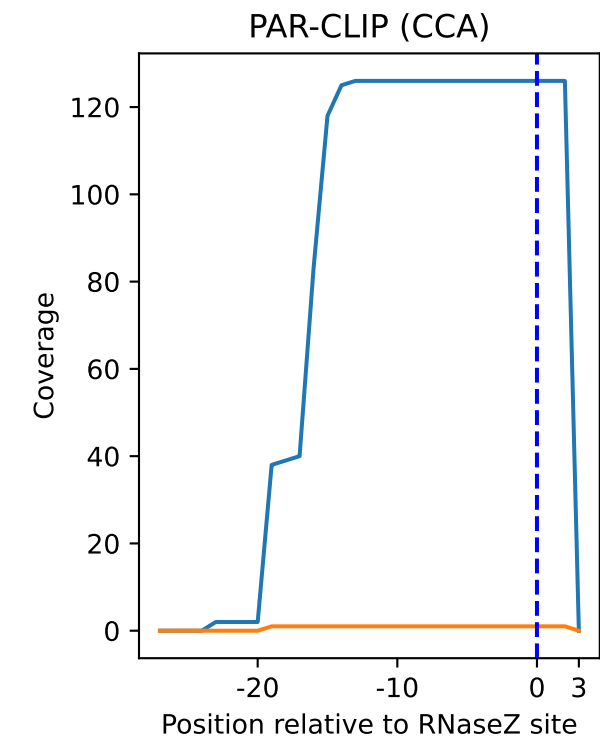

# tRNA-Pro-TGG-1-1

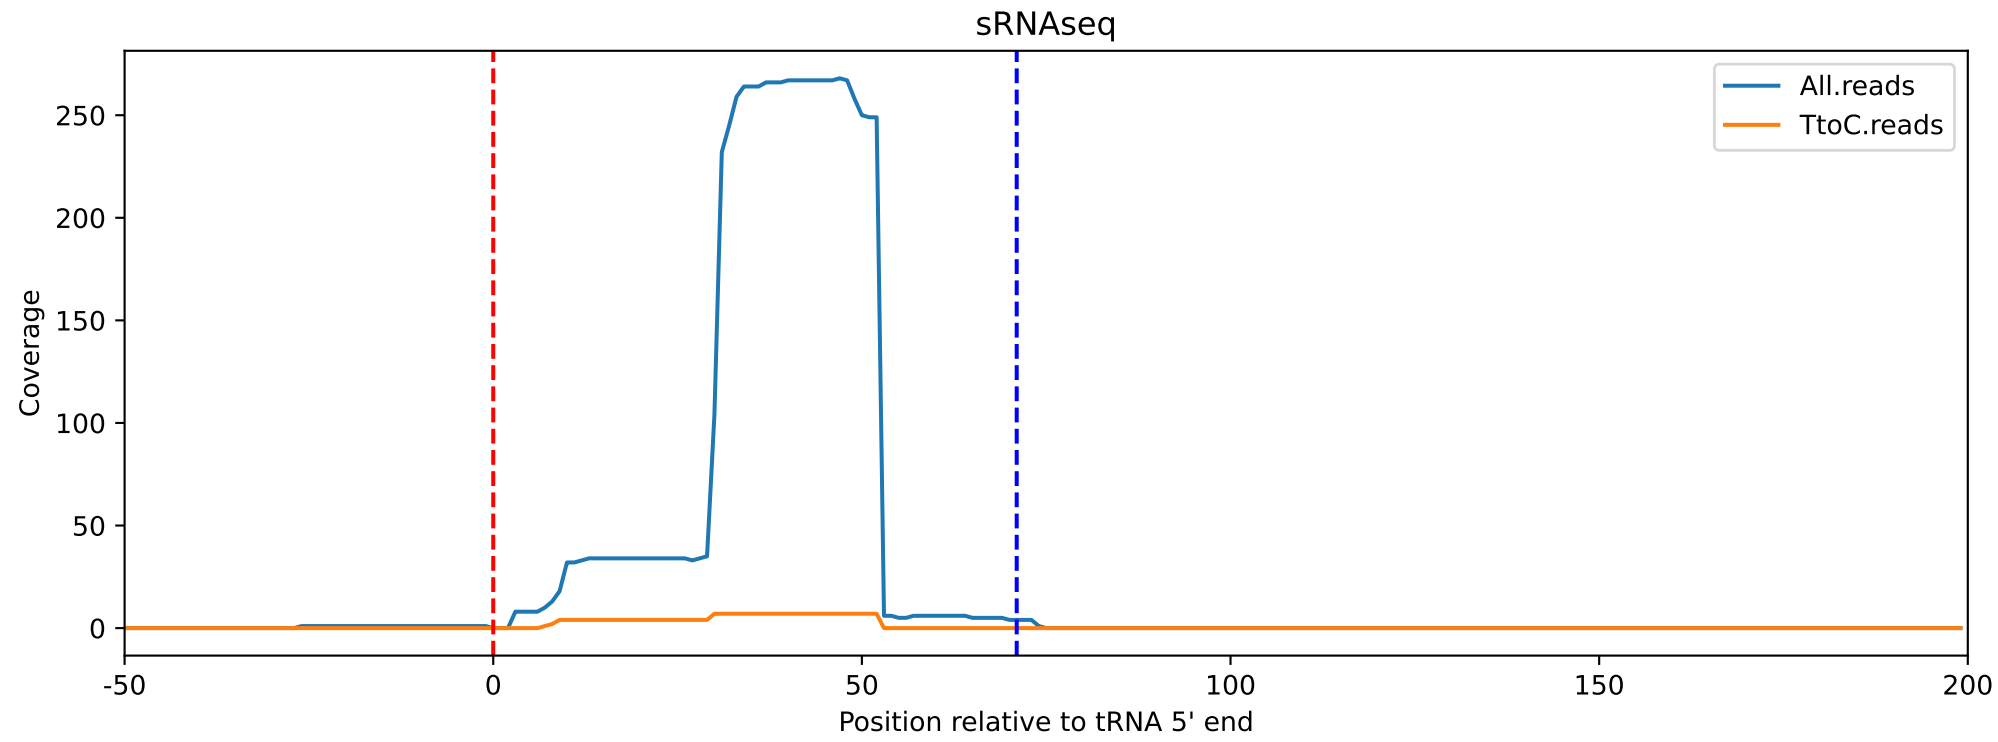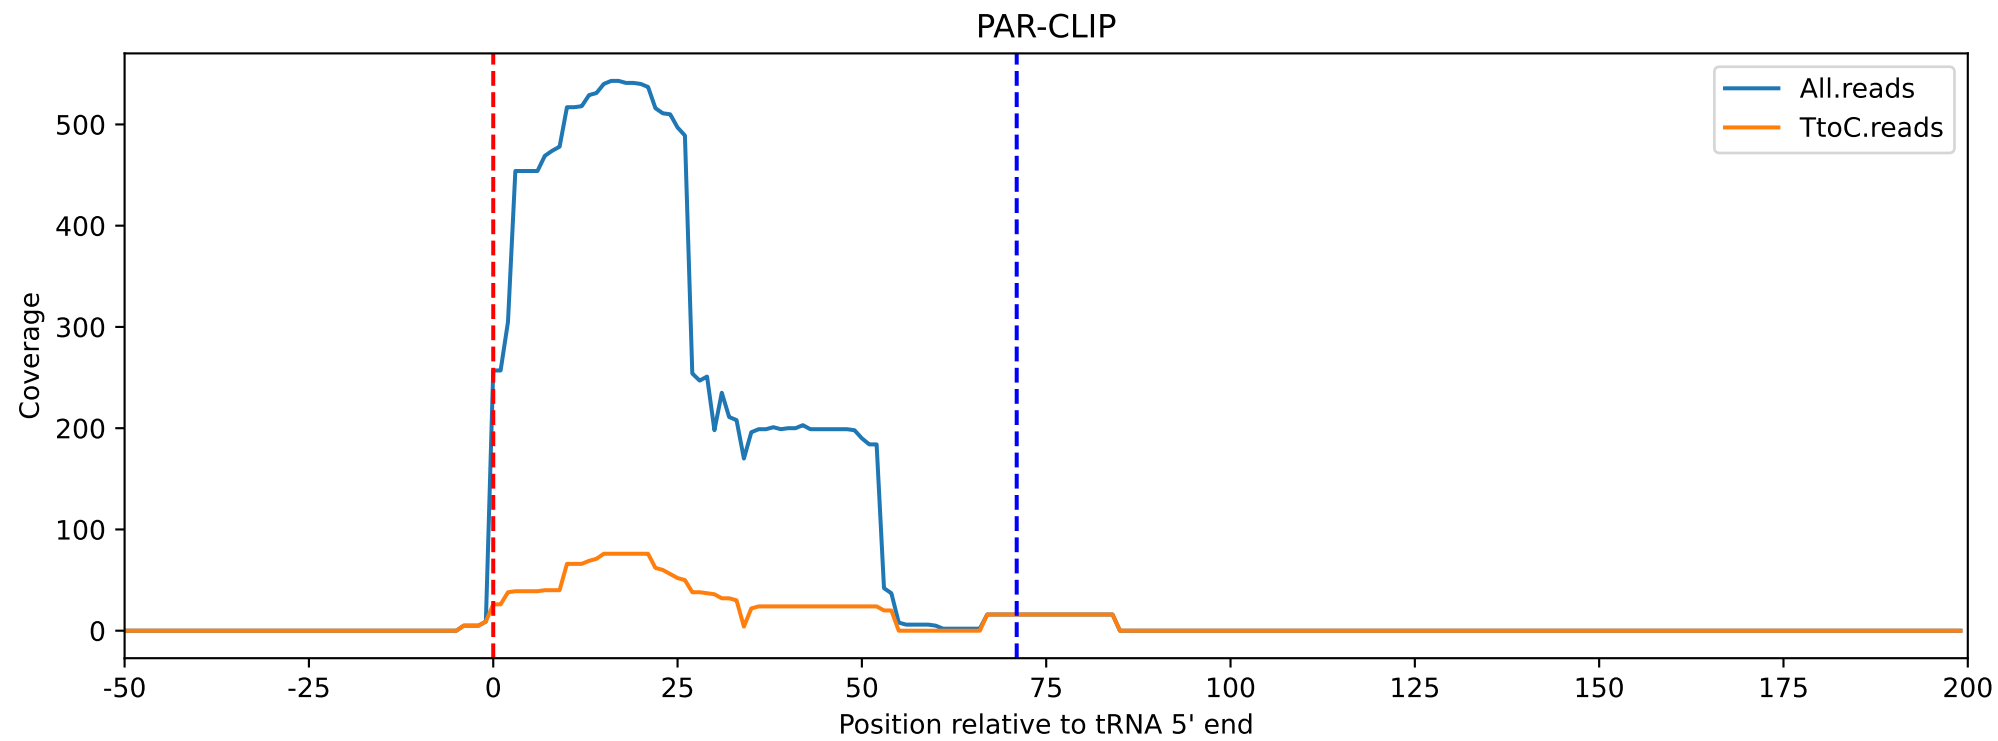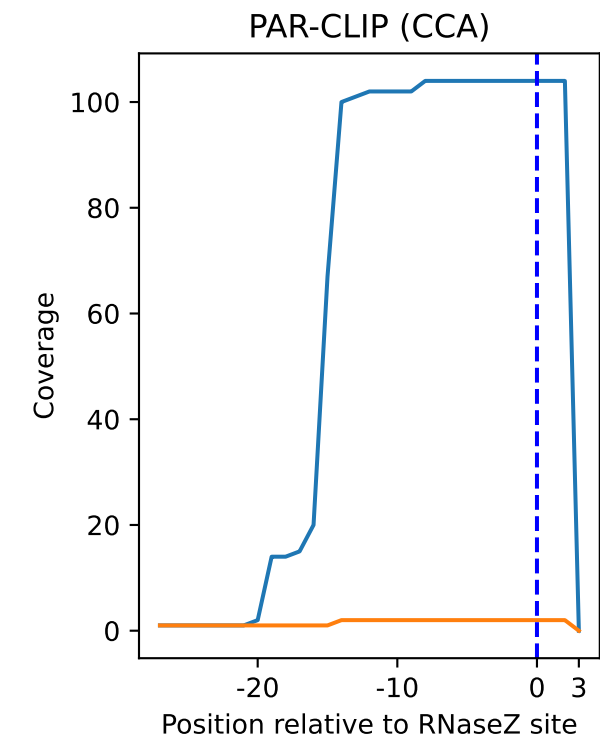

# tRNA-Ile-AAT-1-7

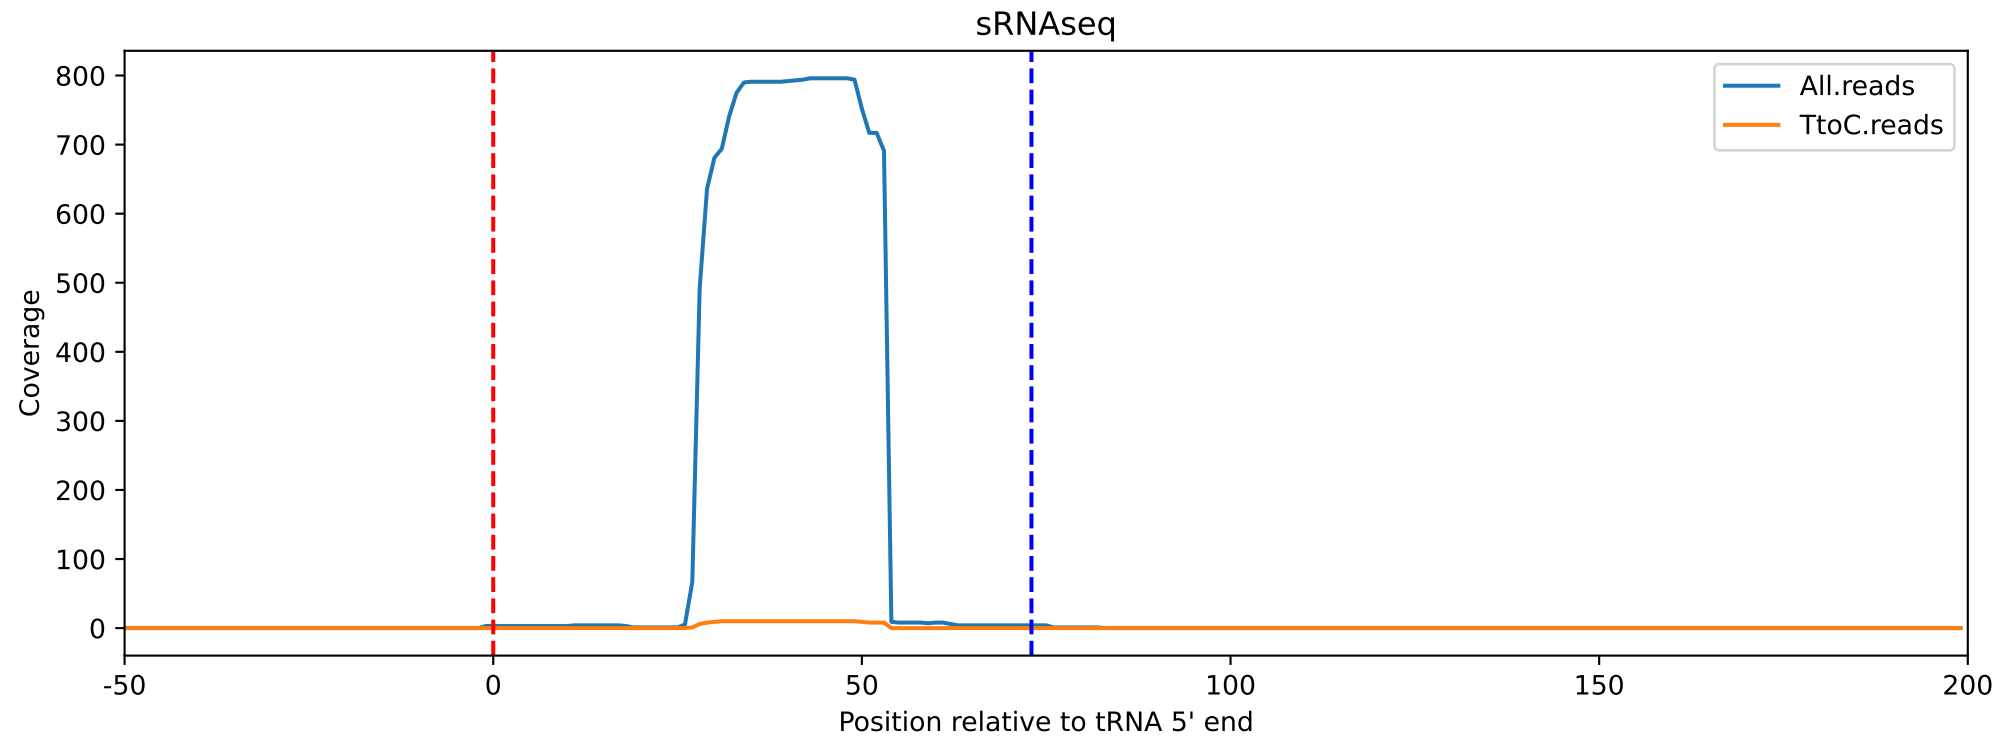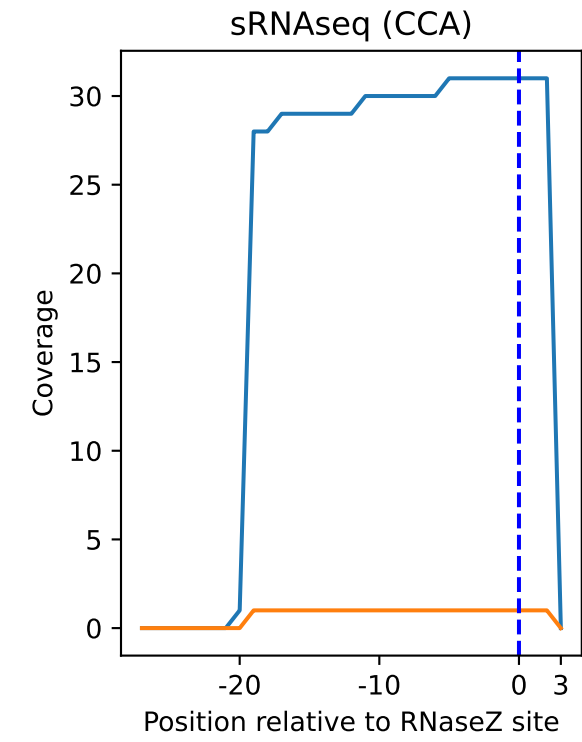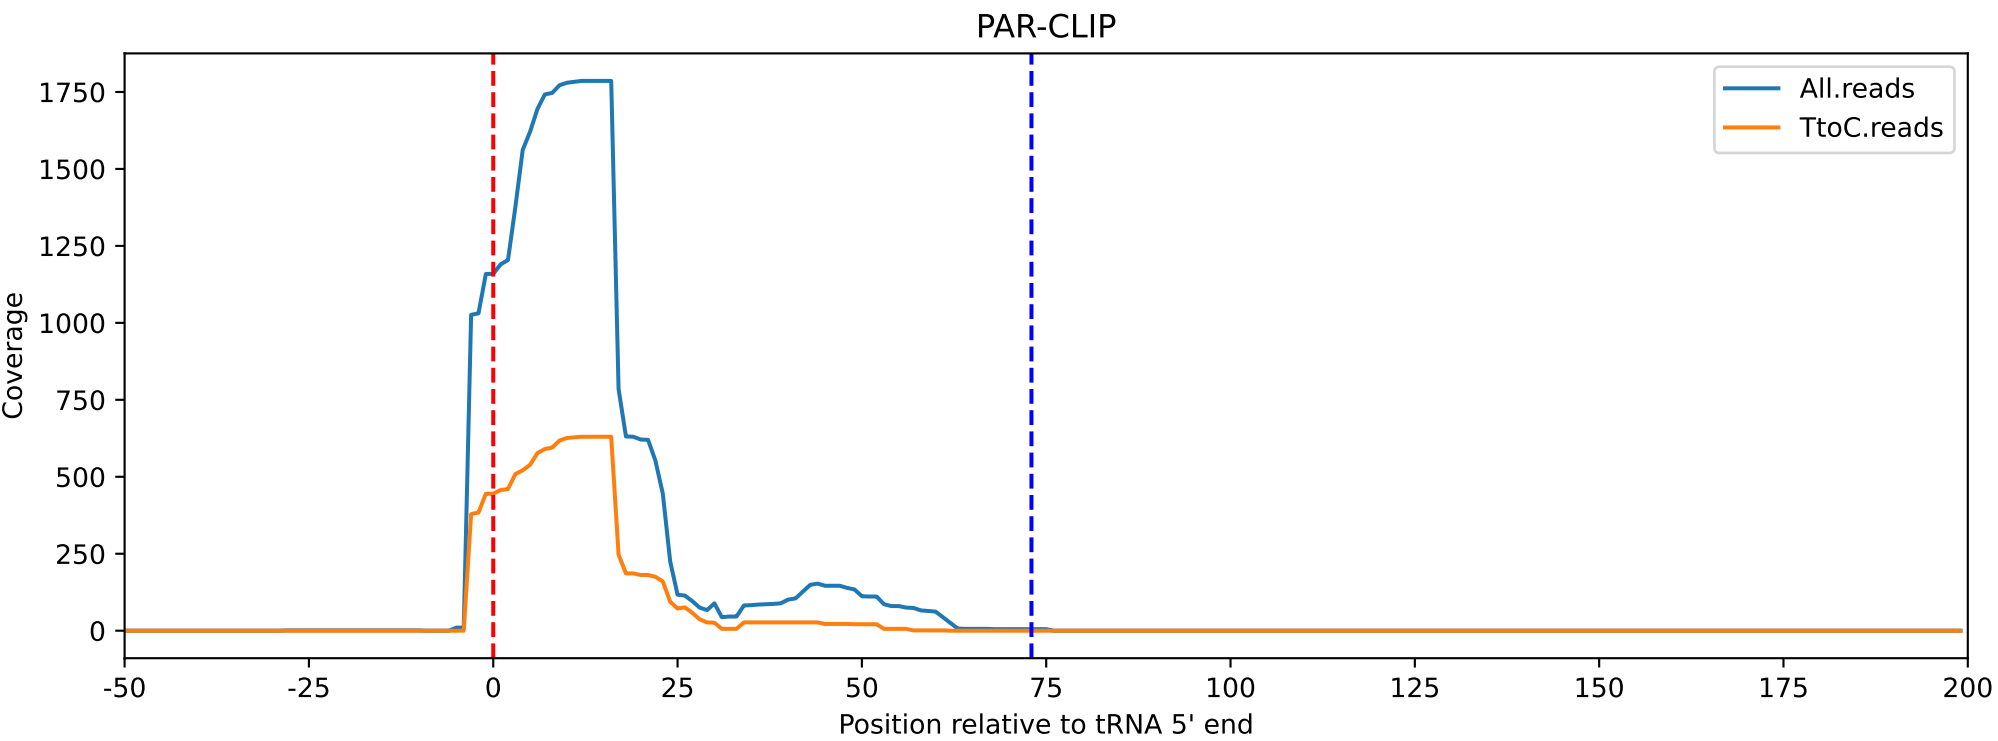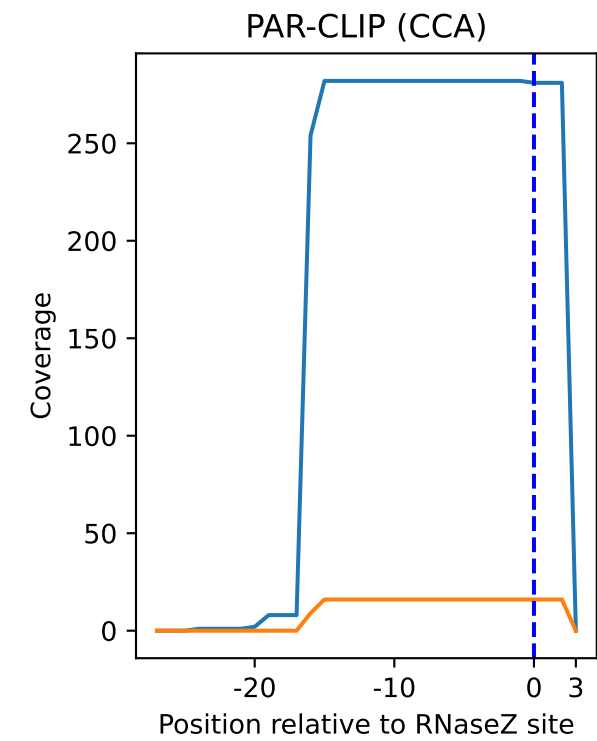

# tRNA-Gln-TTG-2-1

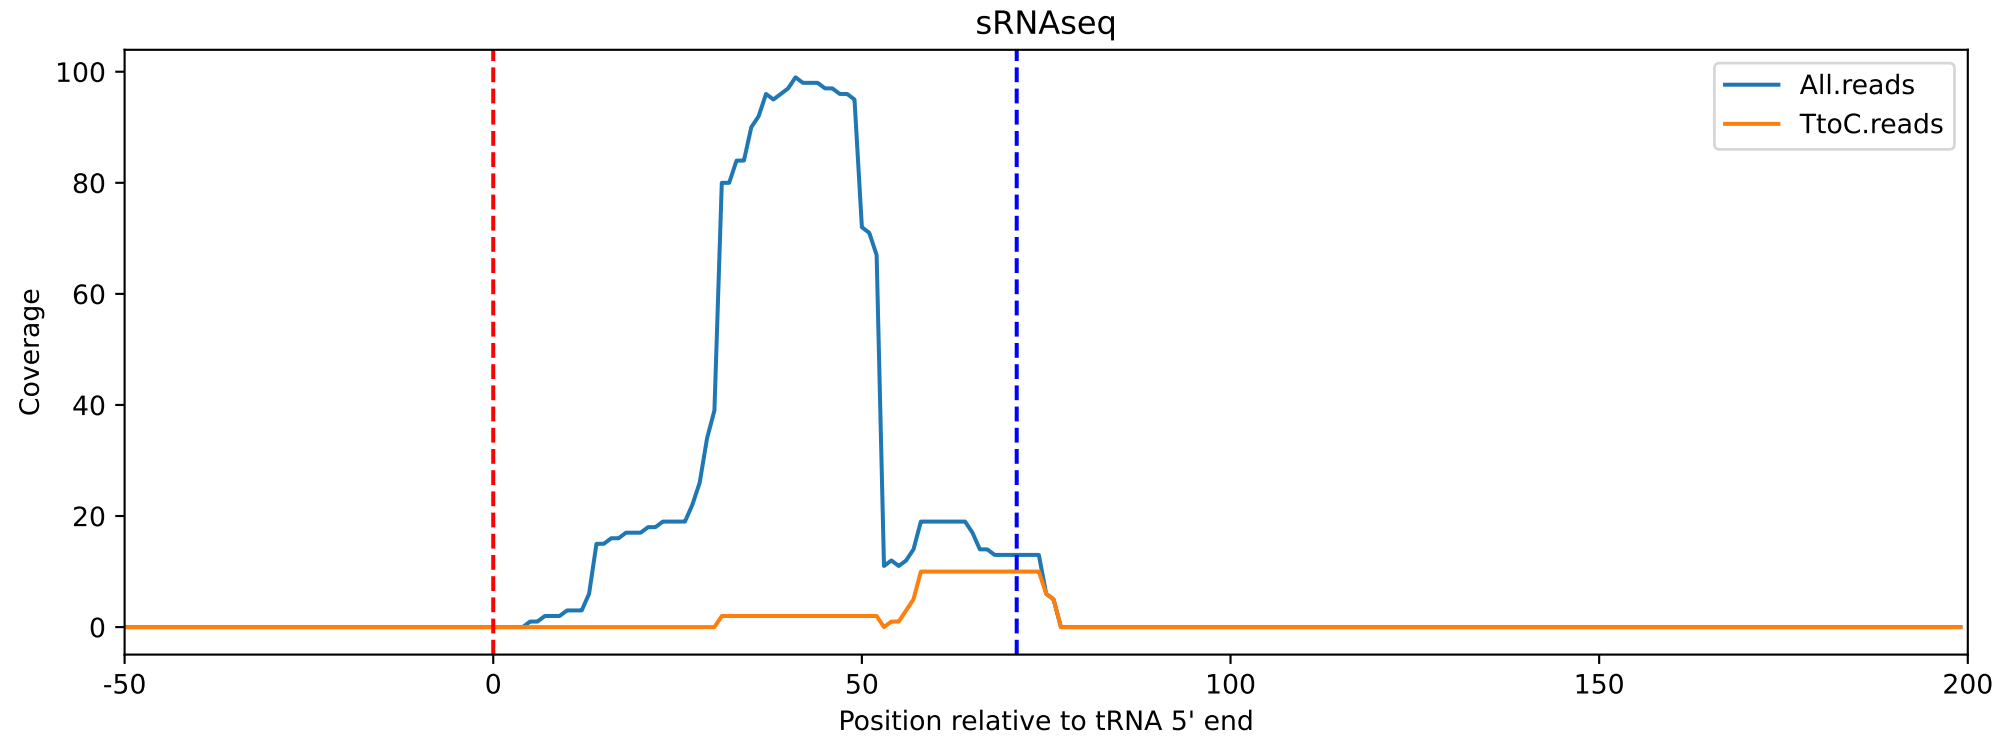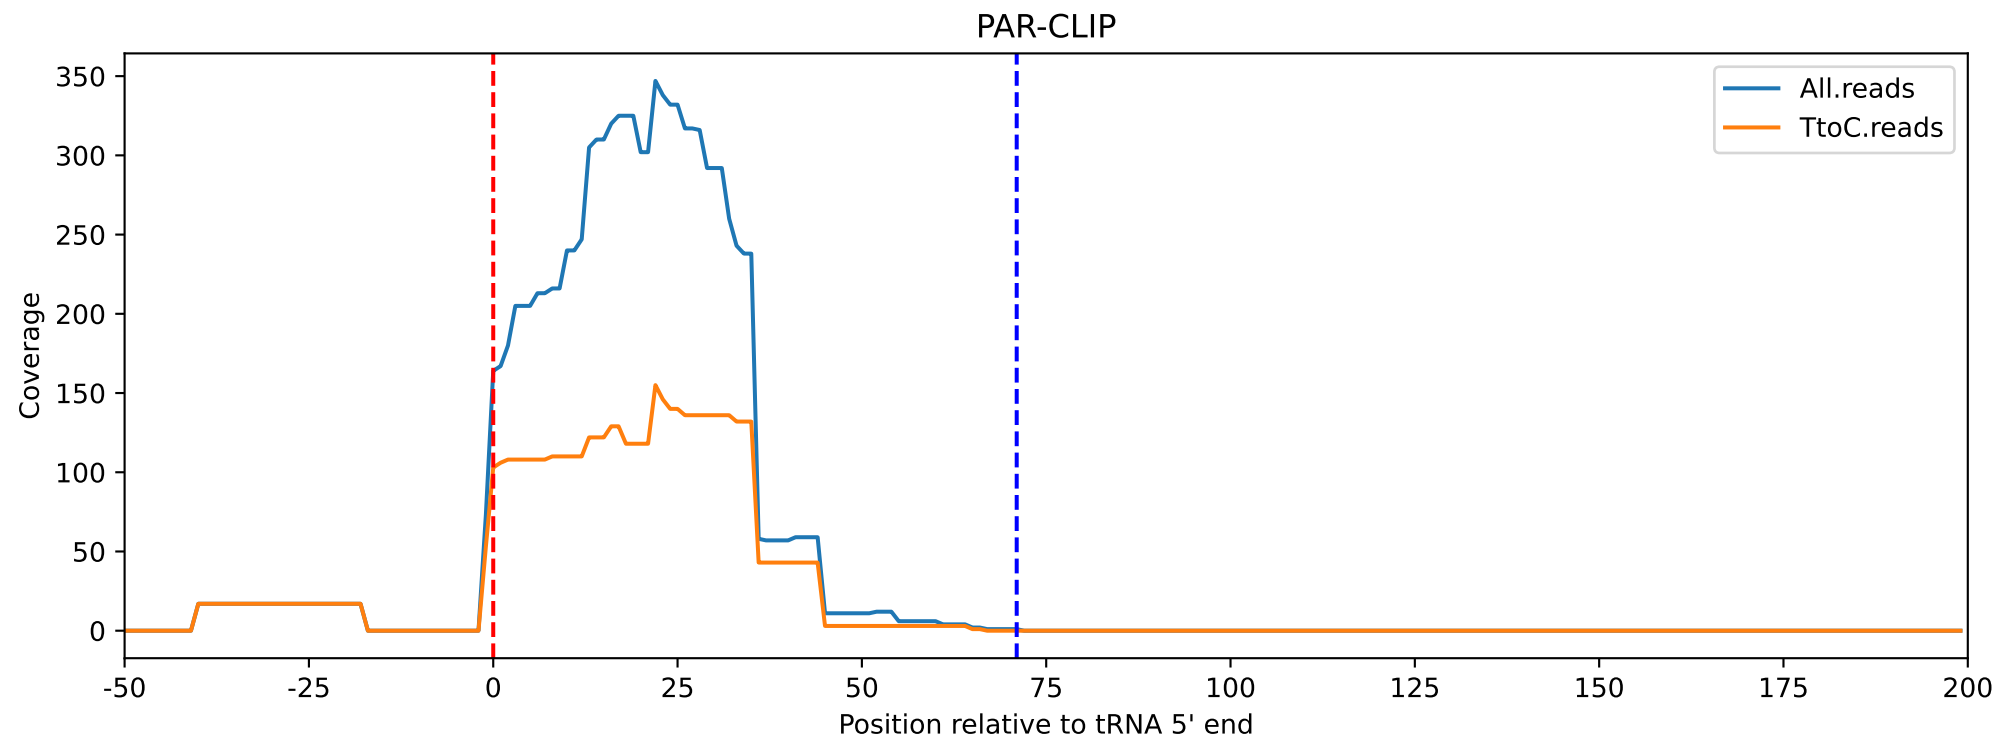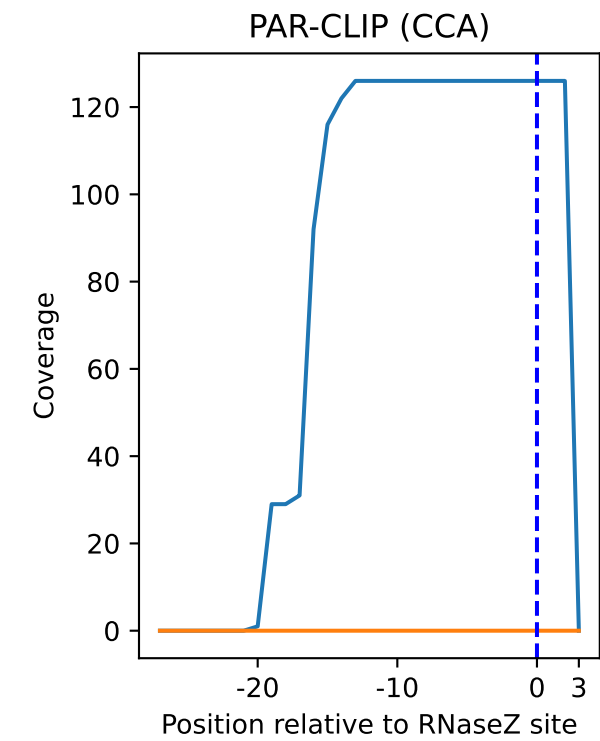

# tRNA-Phe-GAA-1-1

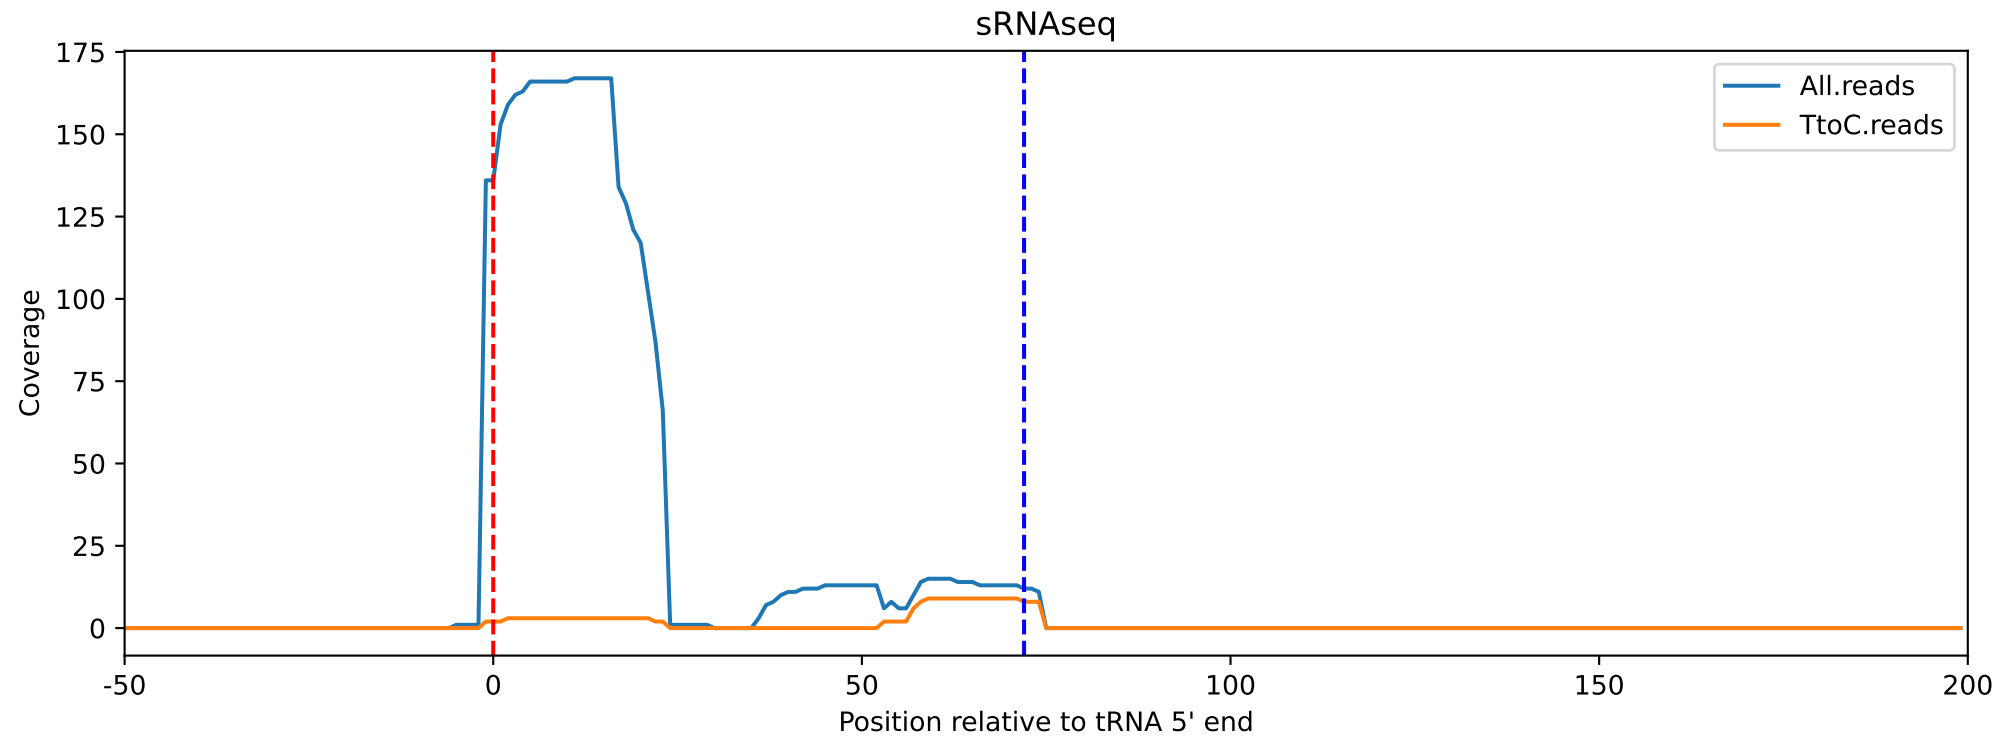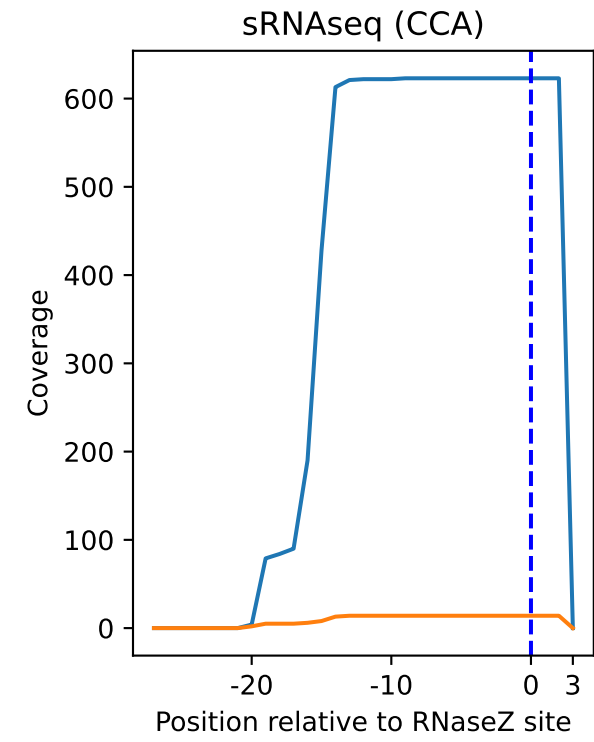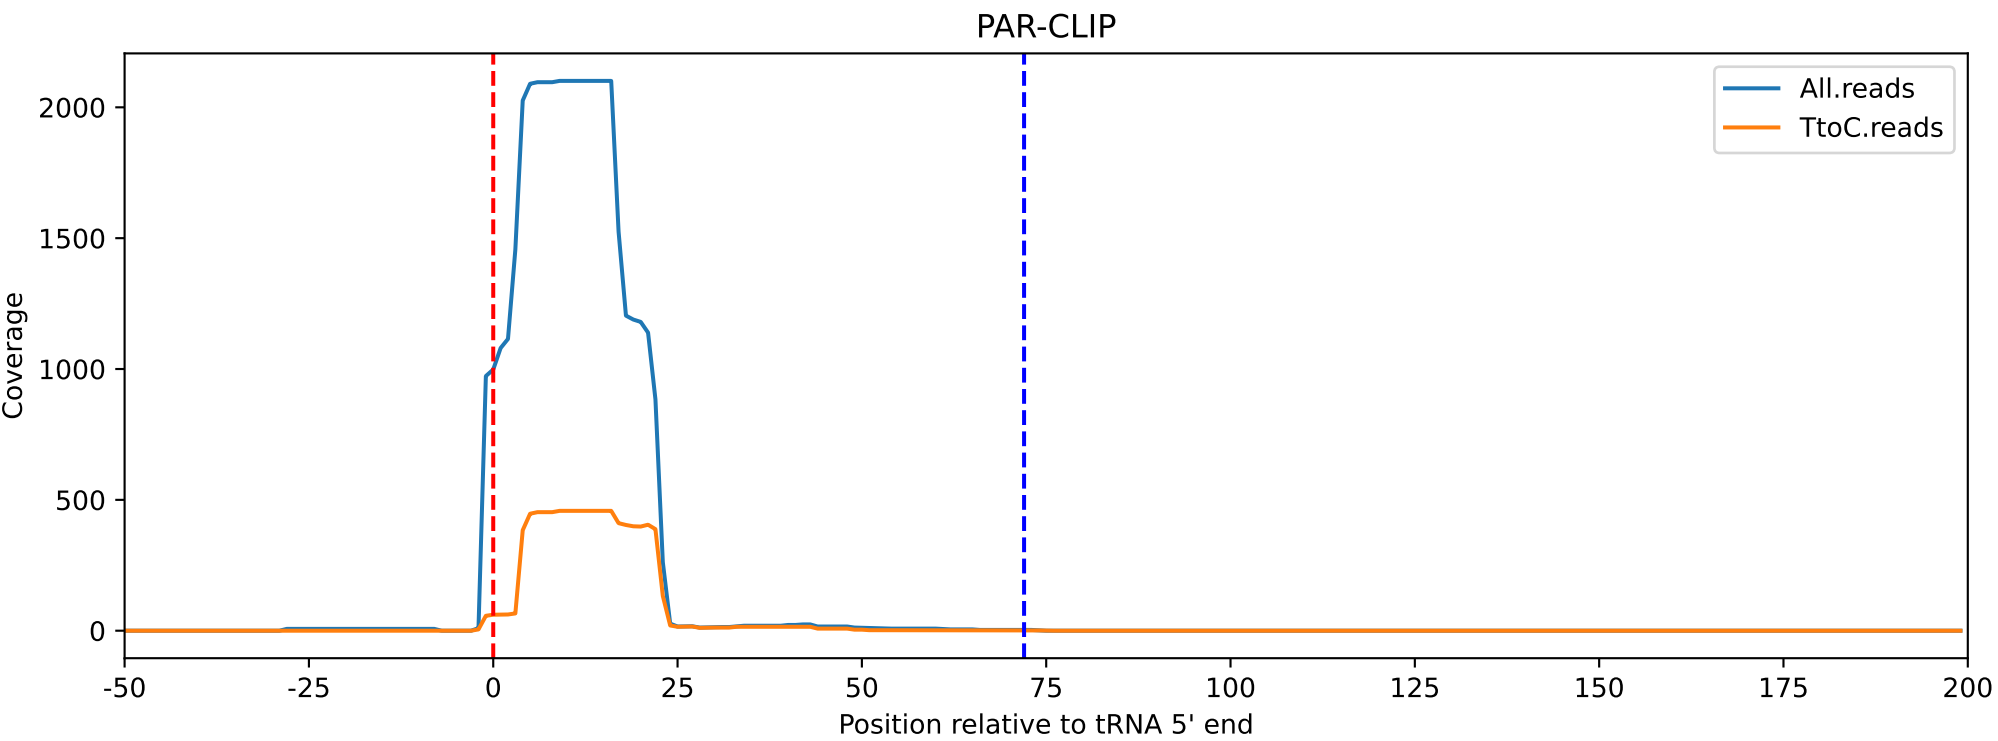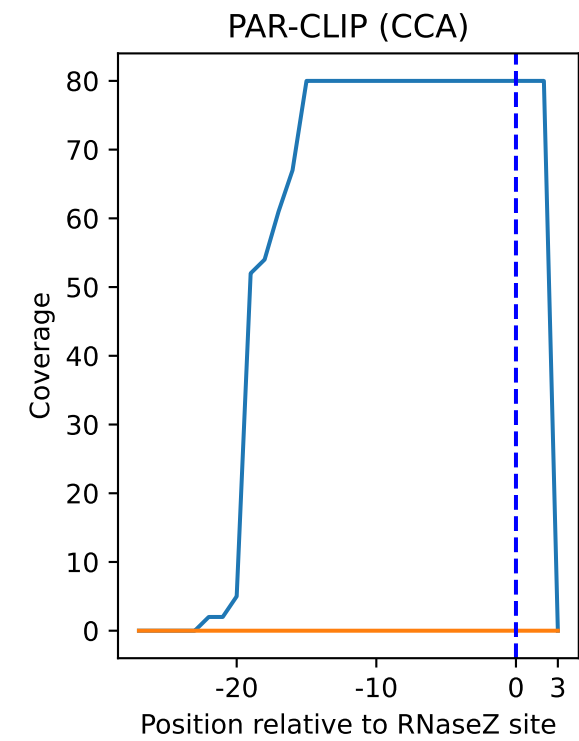

# tRNA-Ile-AAT-1-9

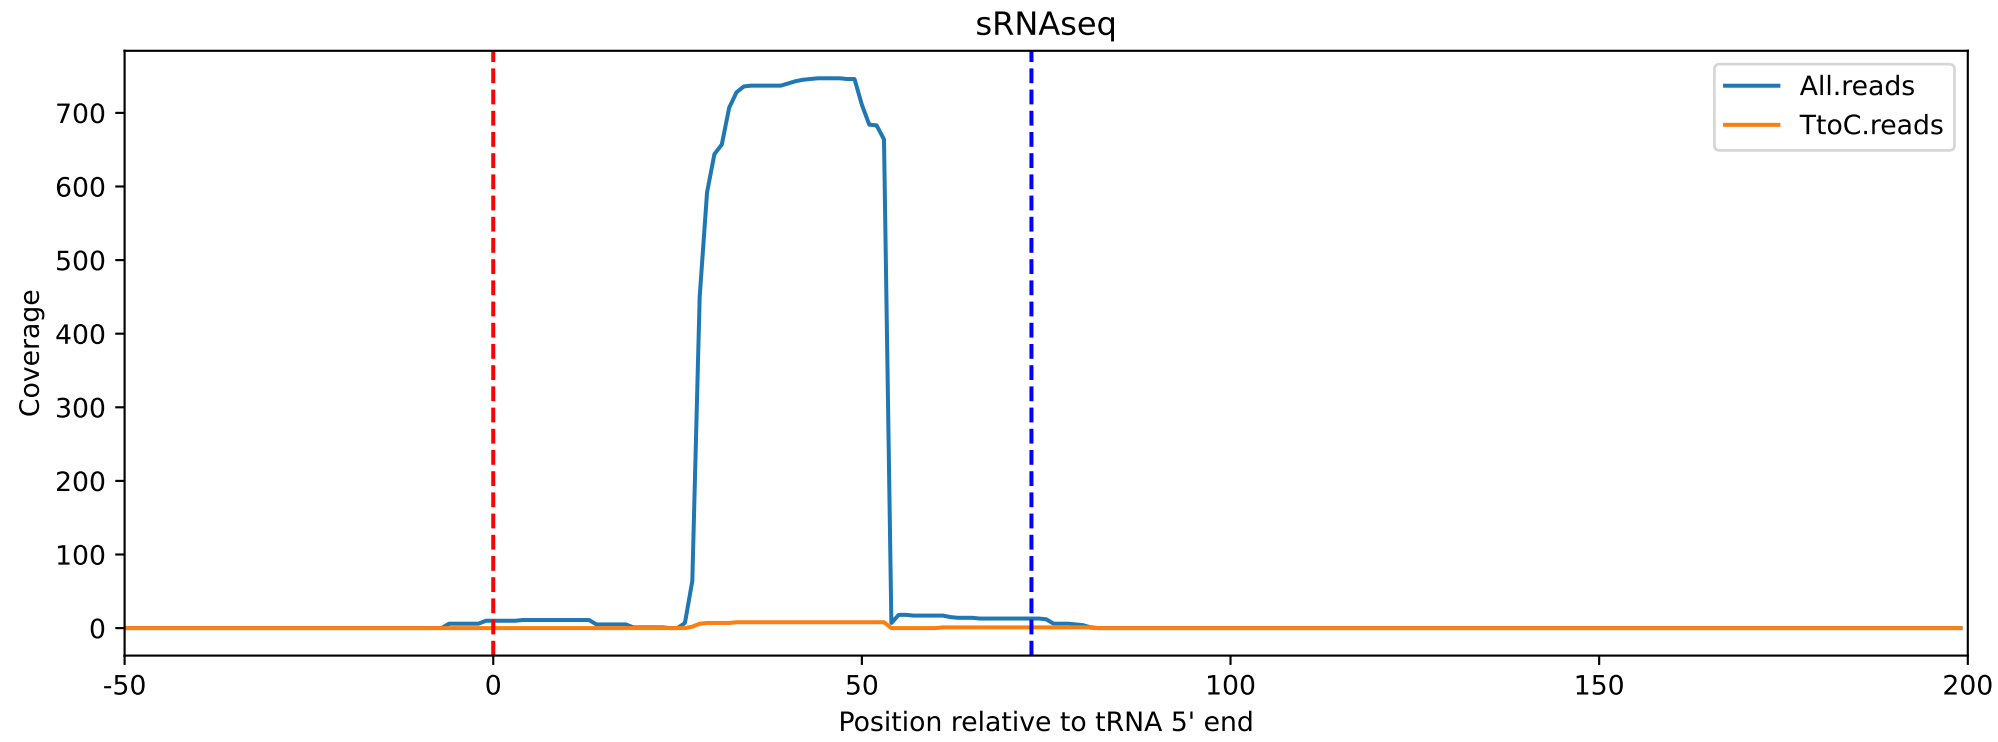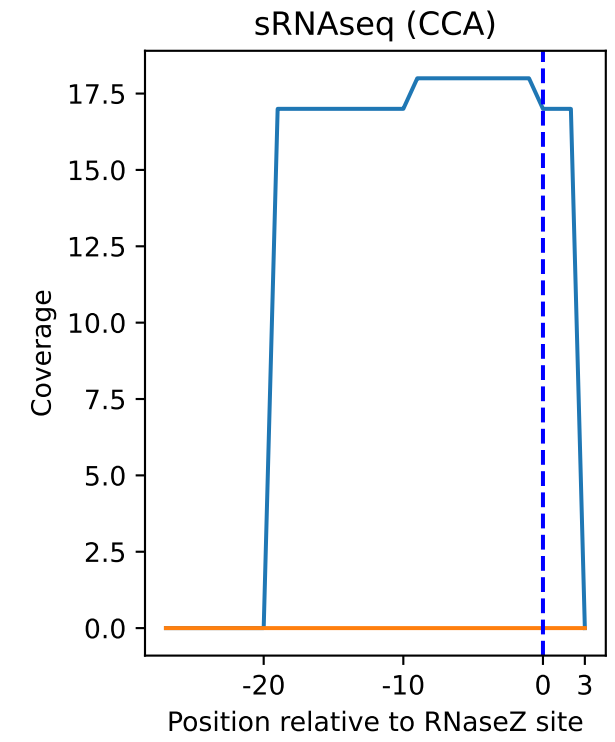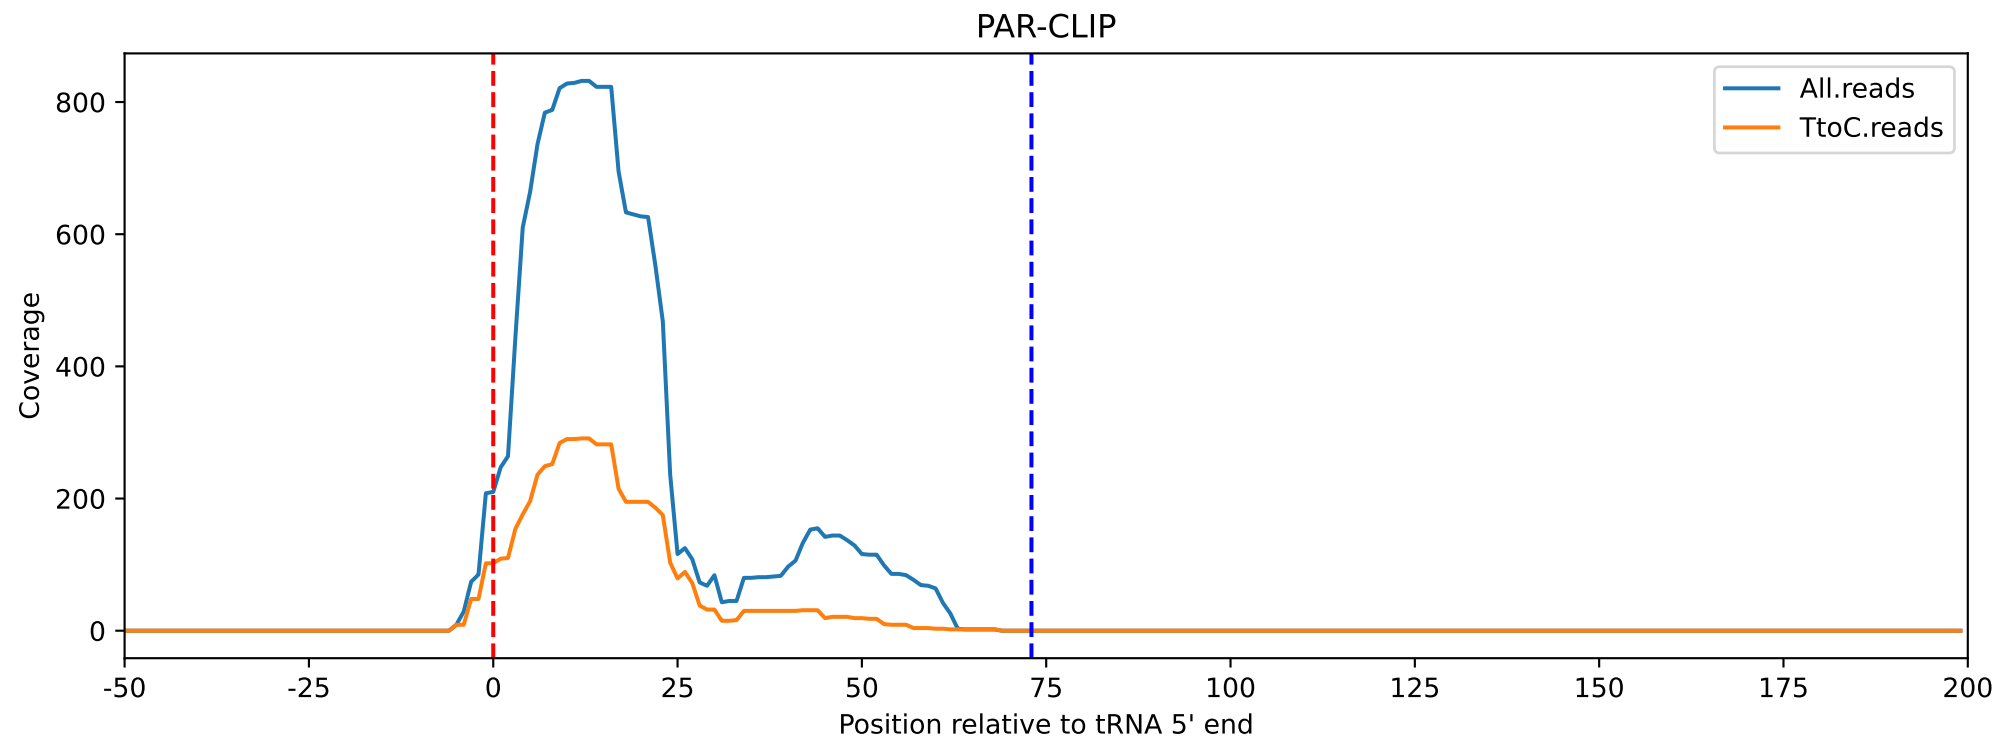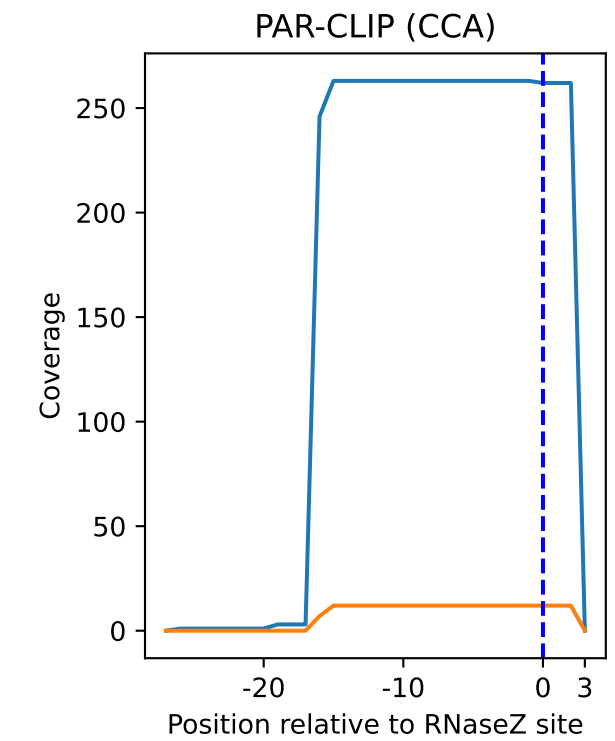



# tRNA-Gly-GCC-1-1

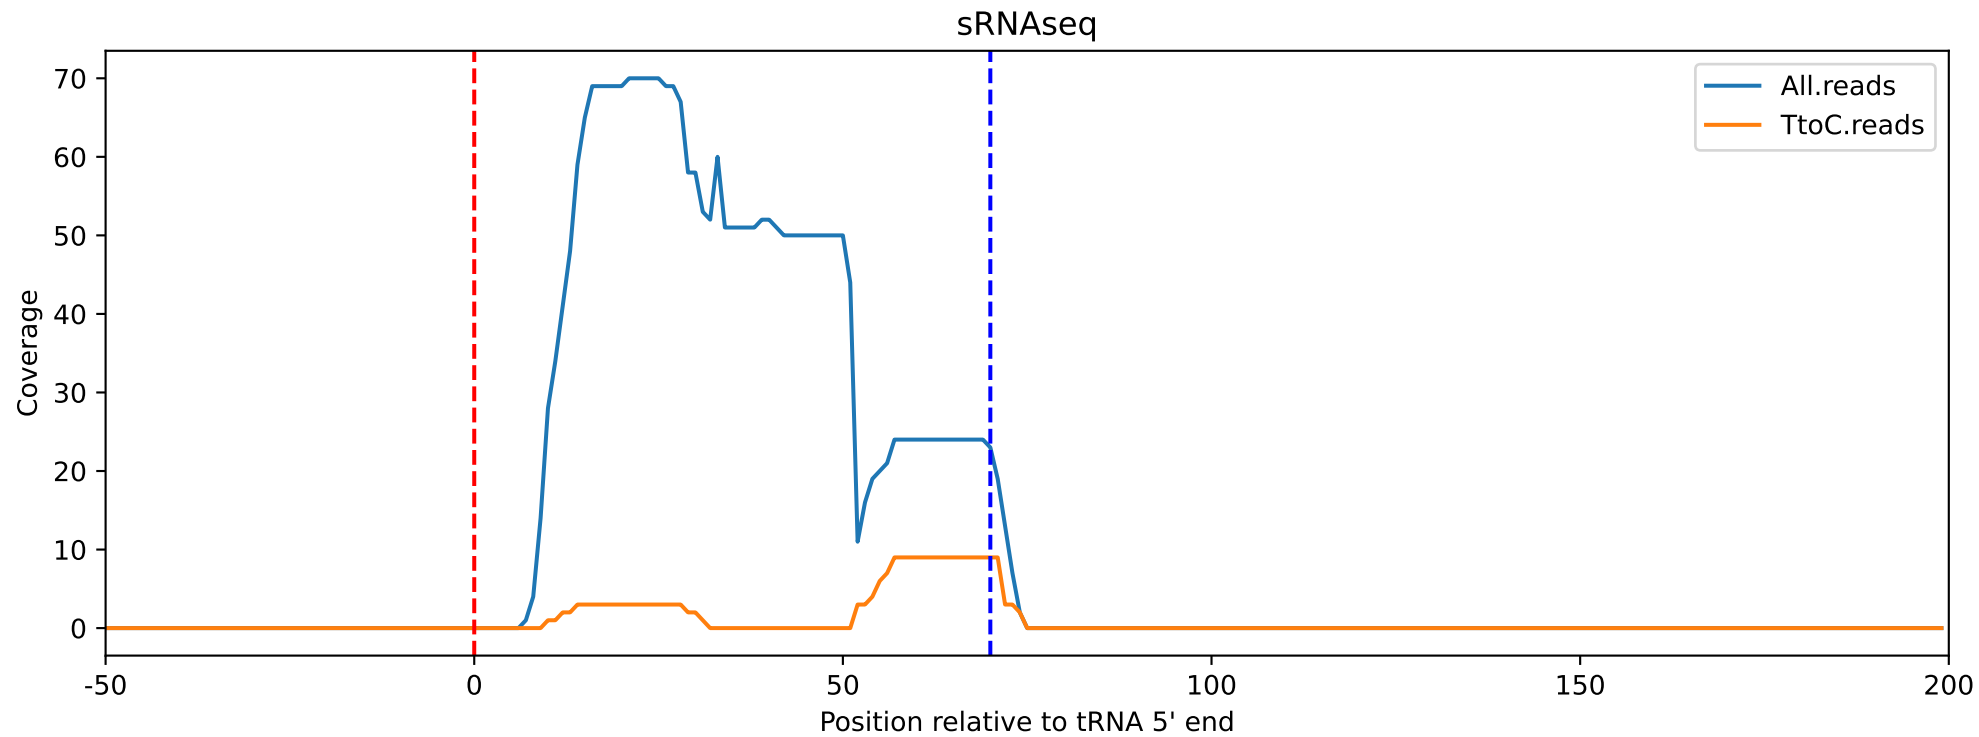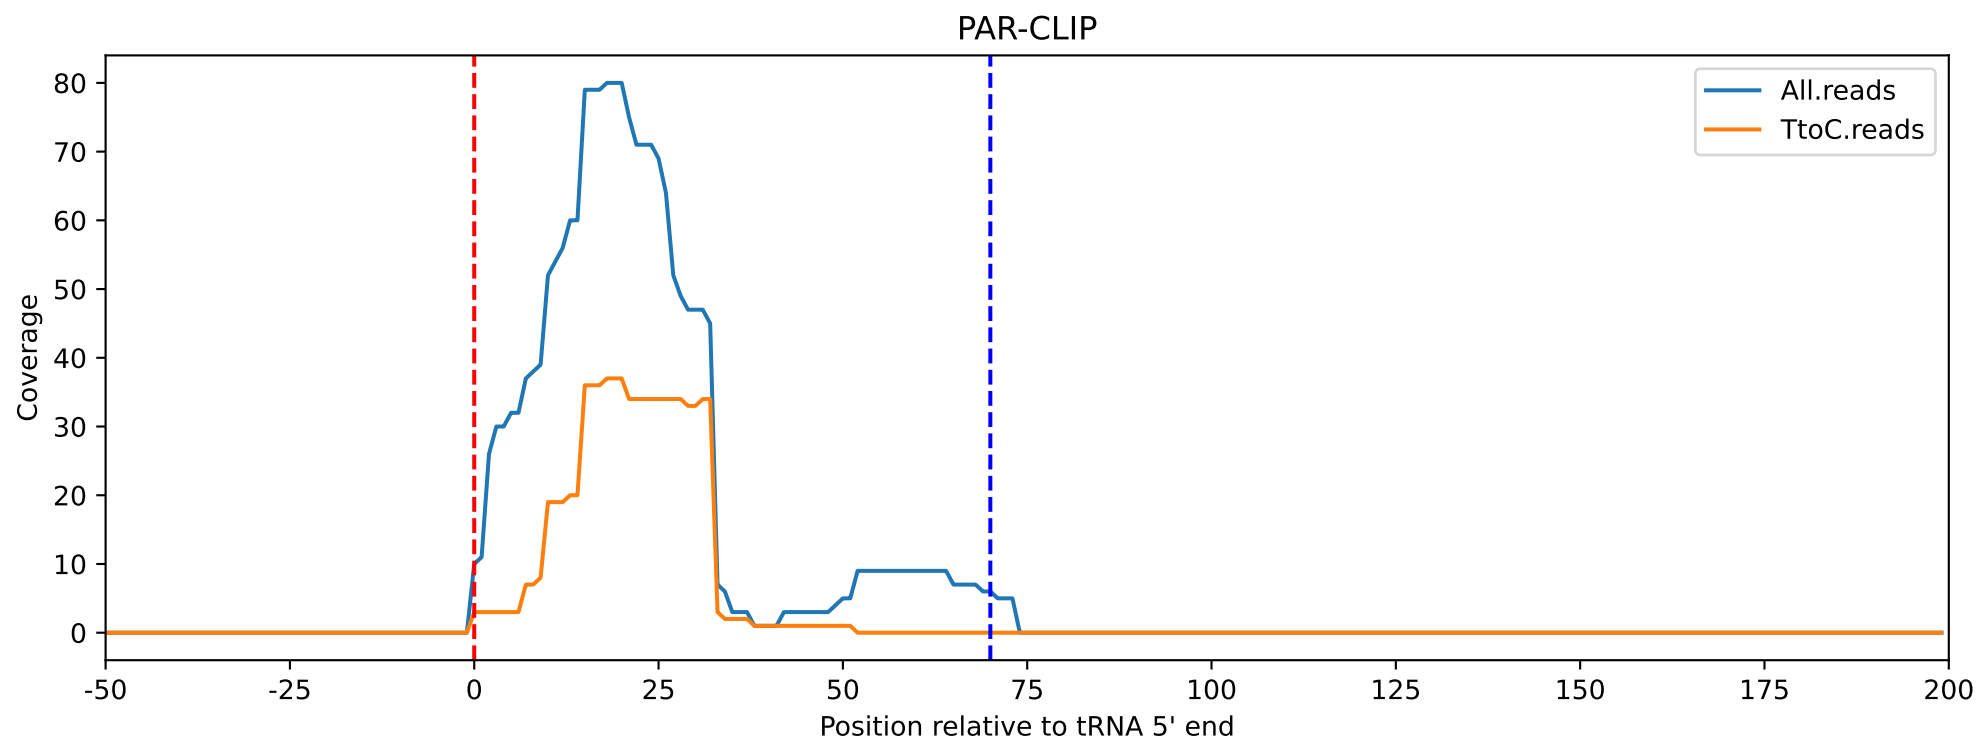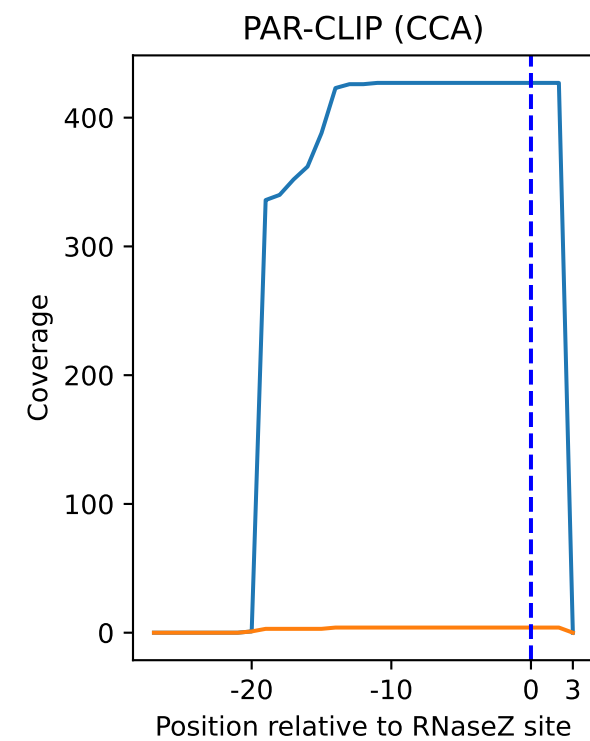

# tRNA-Ser-CGA-1-4

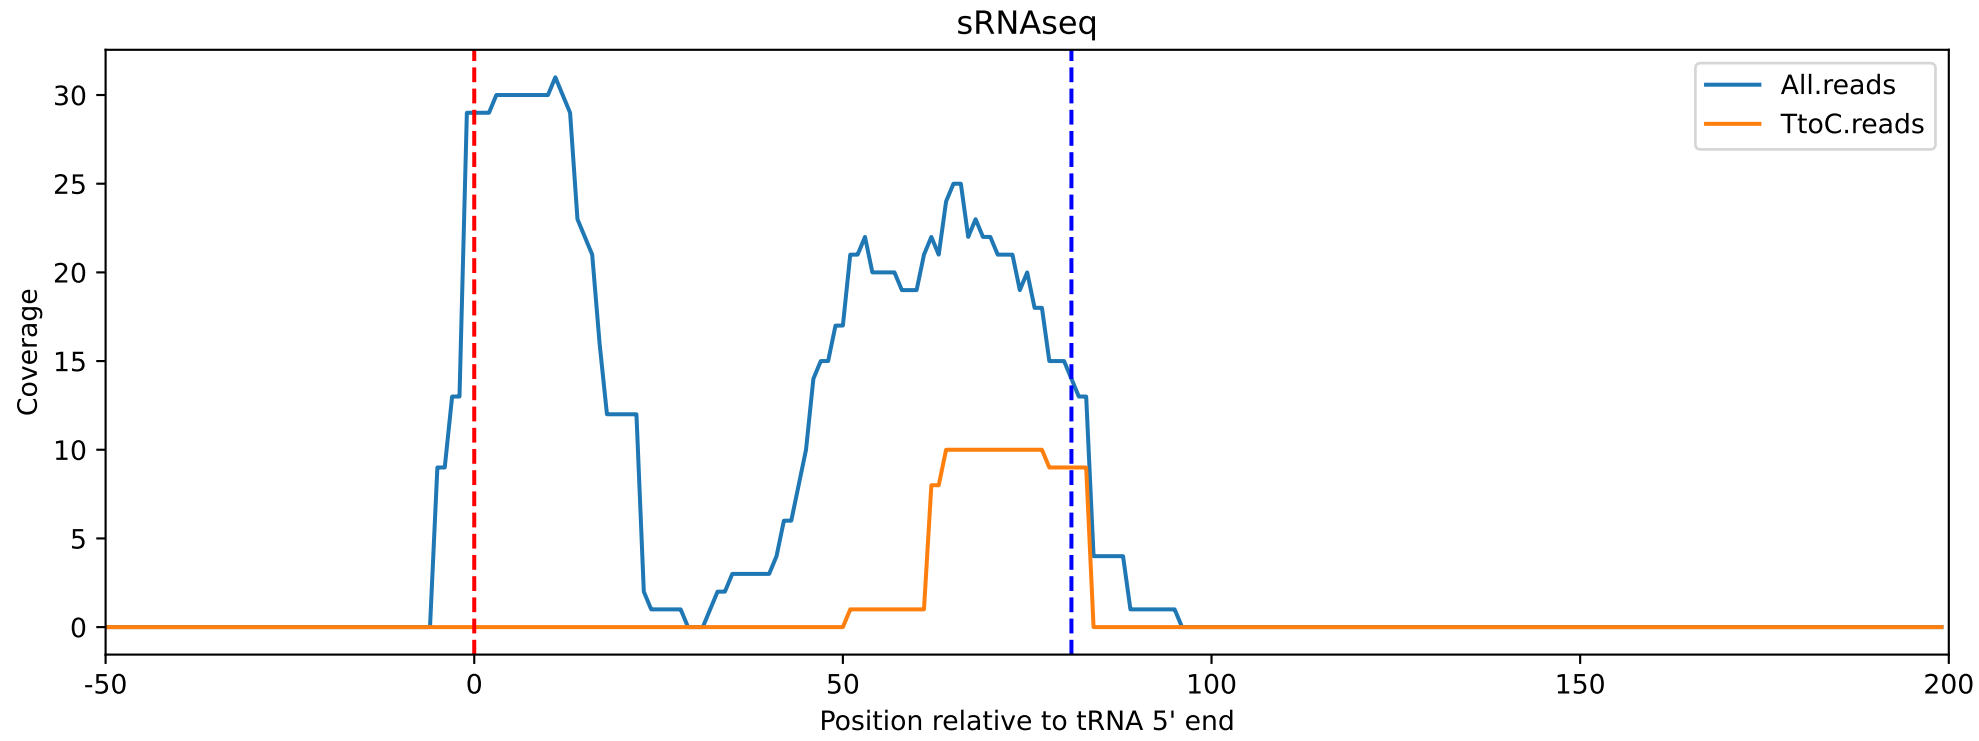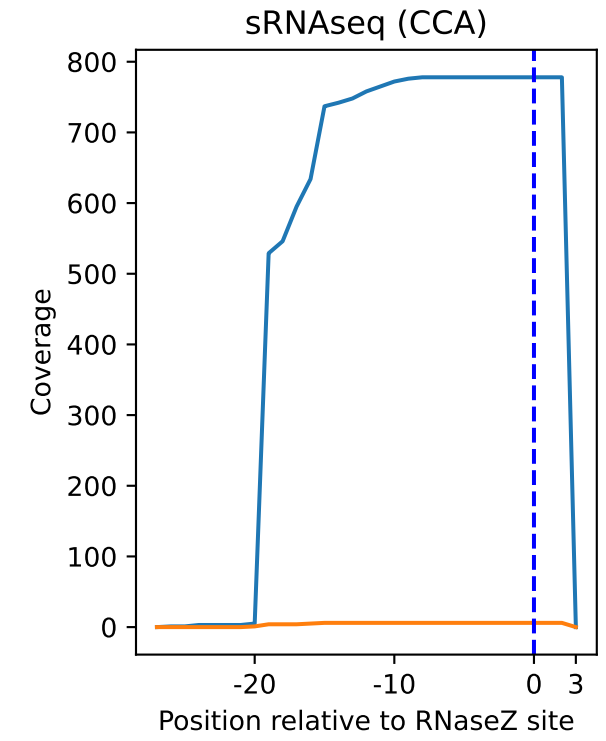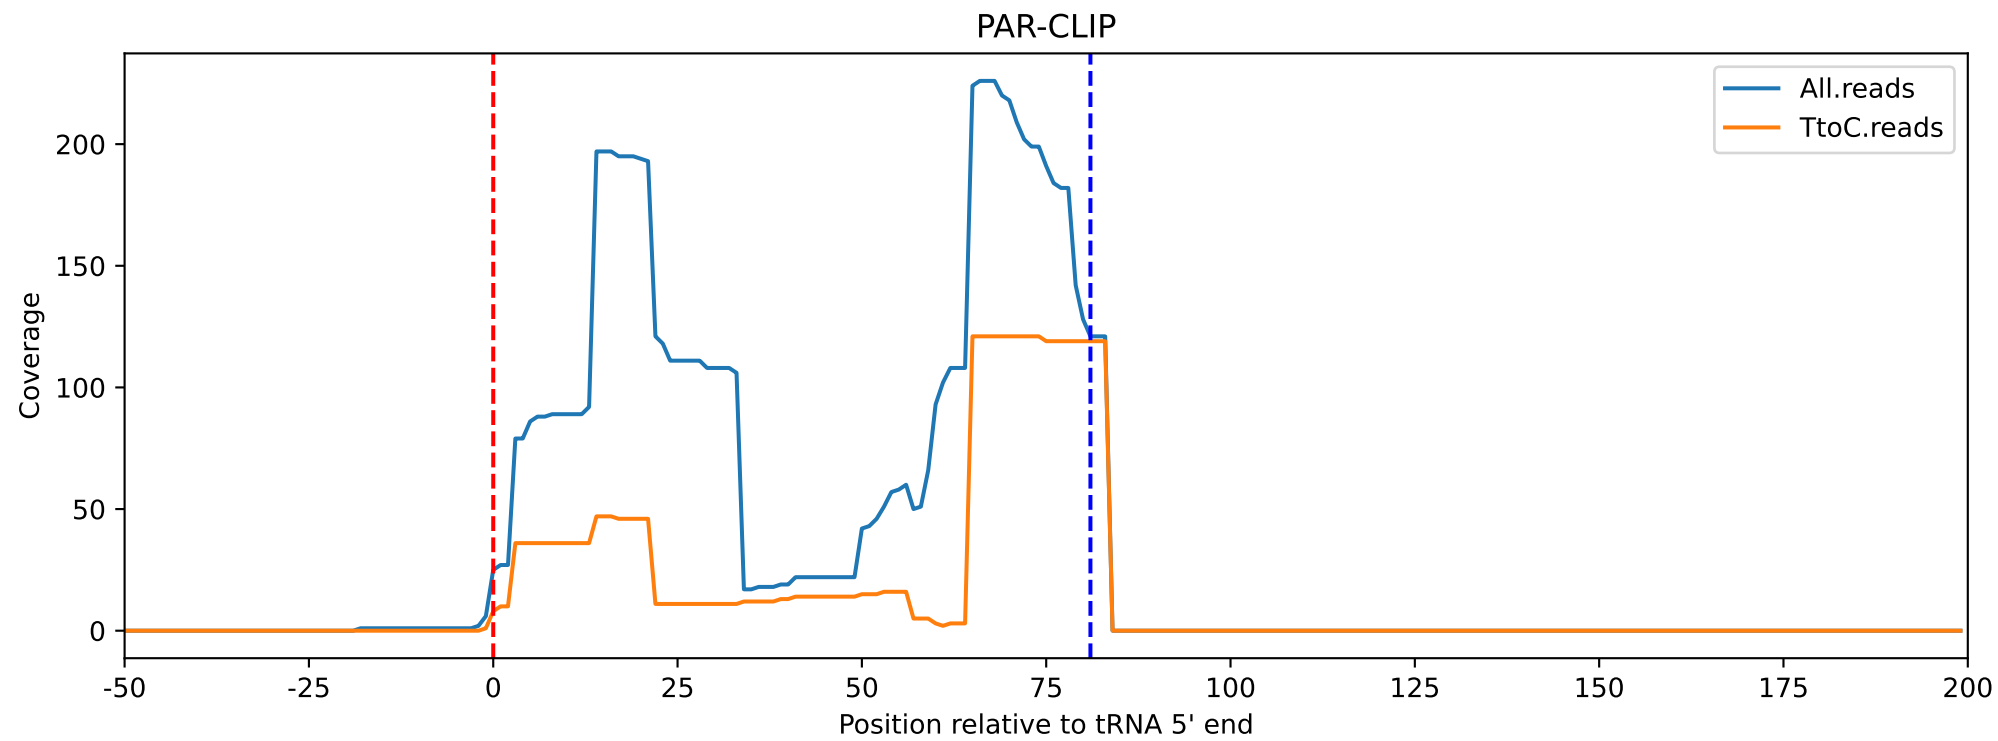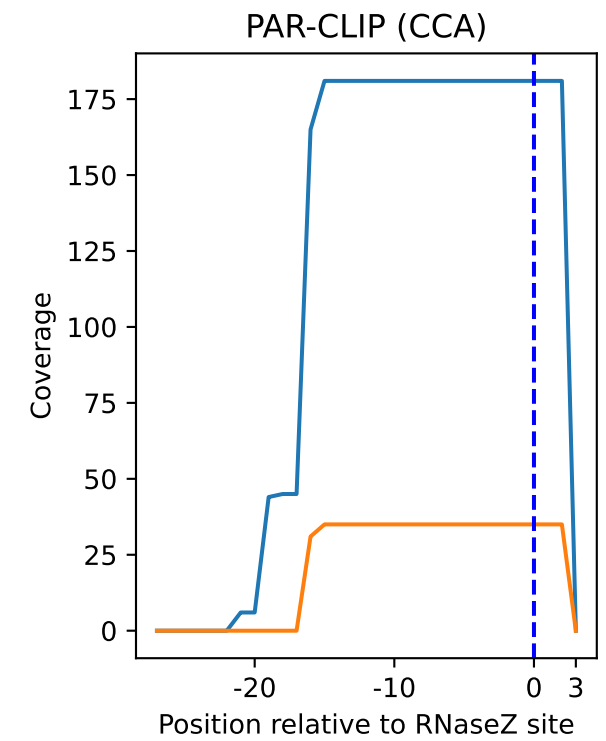

# tRNA-Val-AAC-2-1

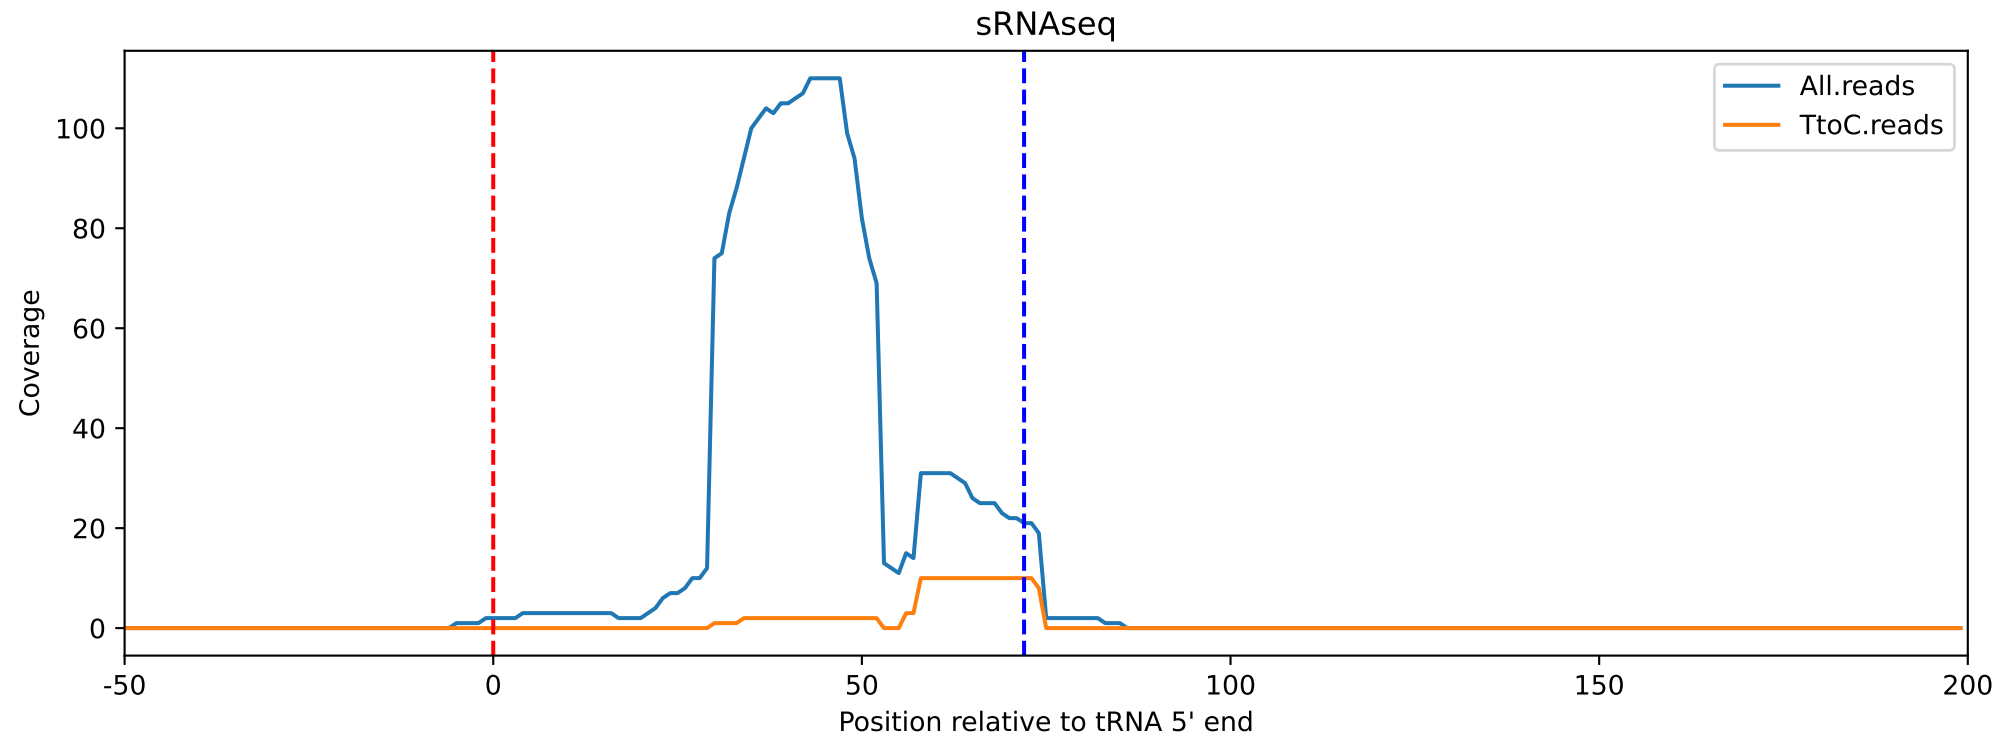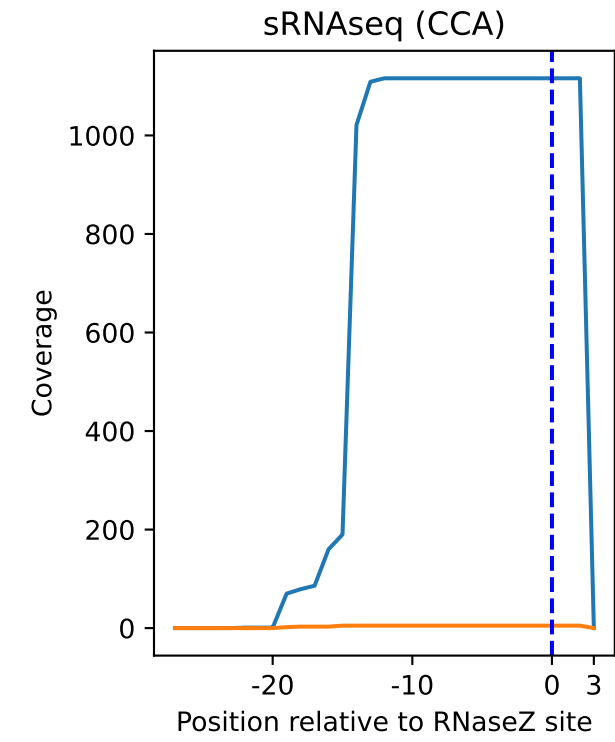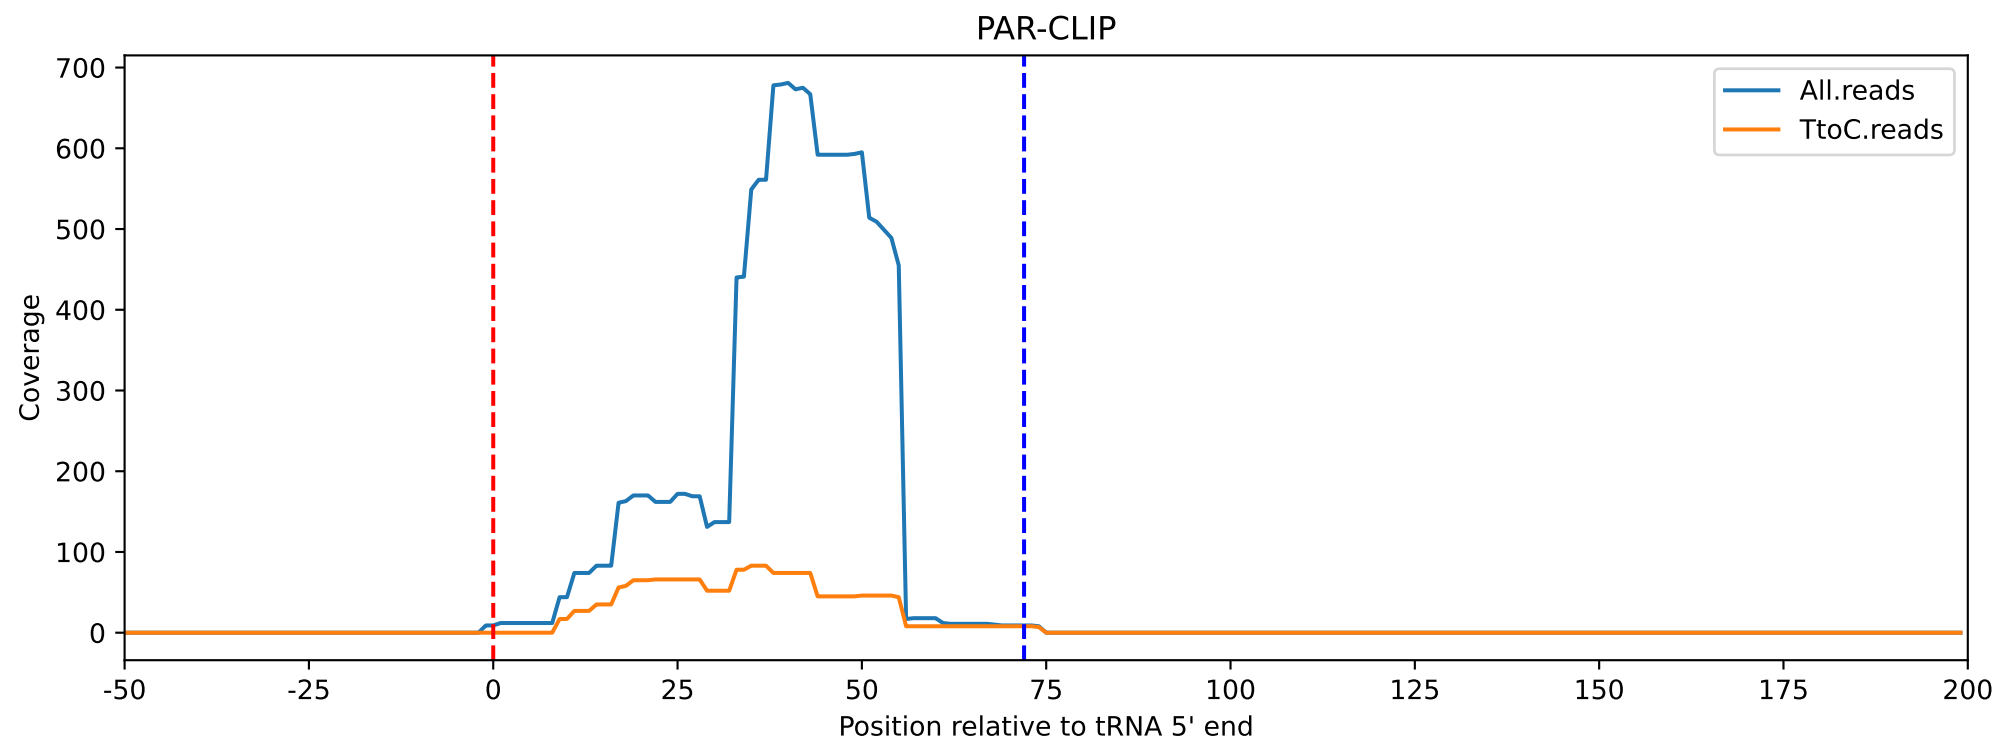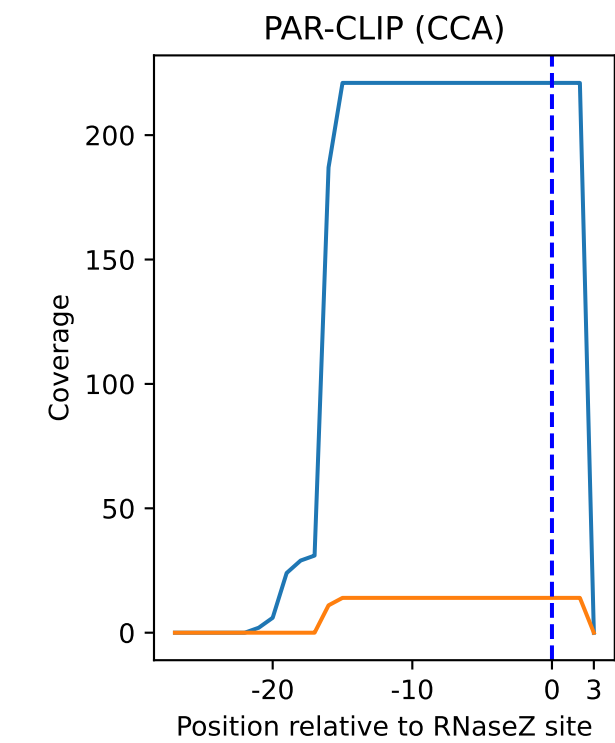

# tRNA-Gly-GCC-1-4

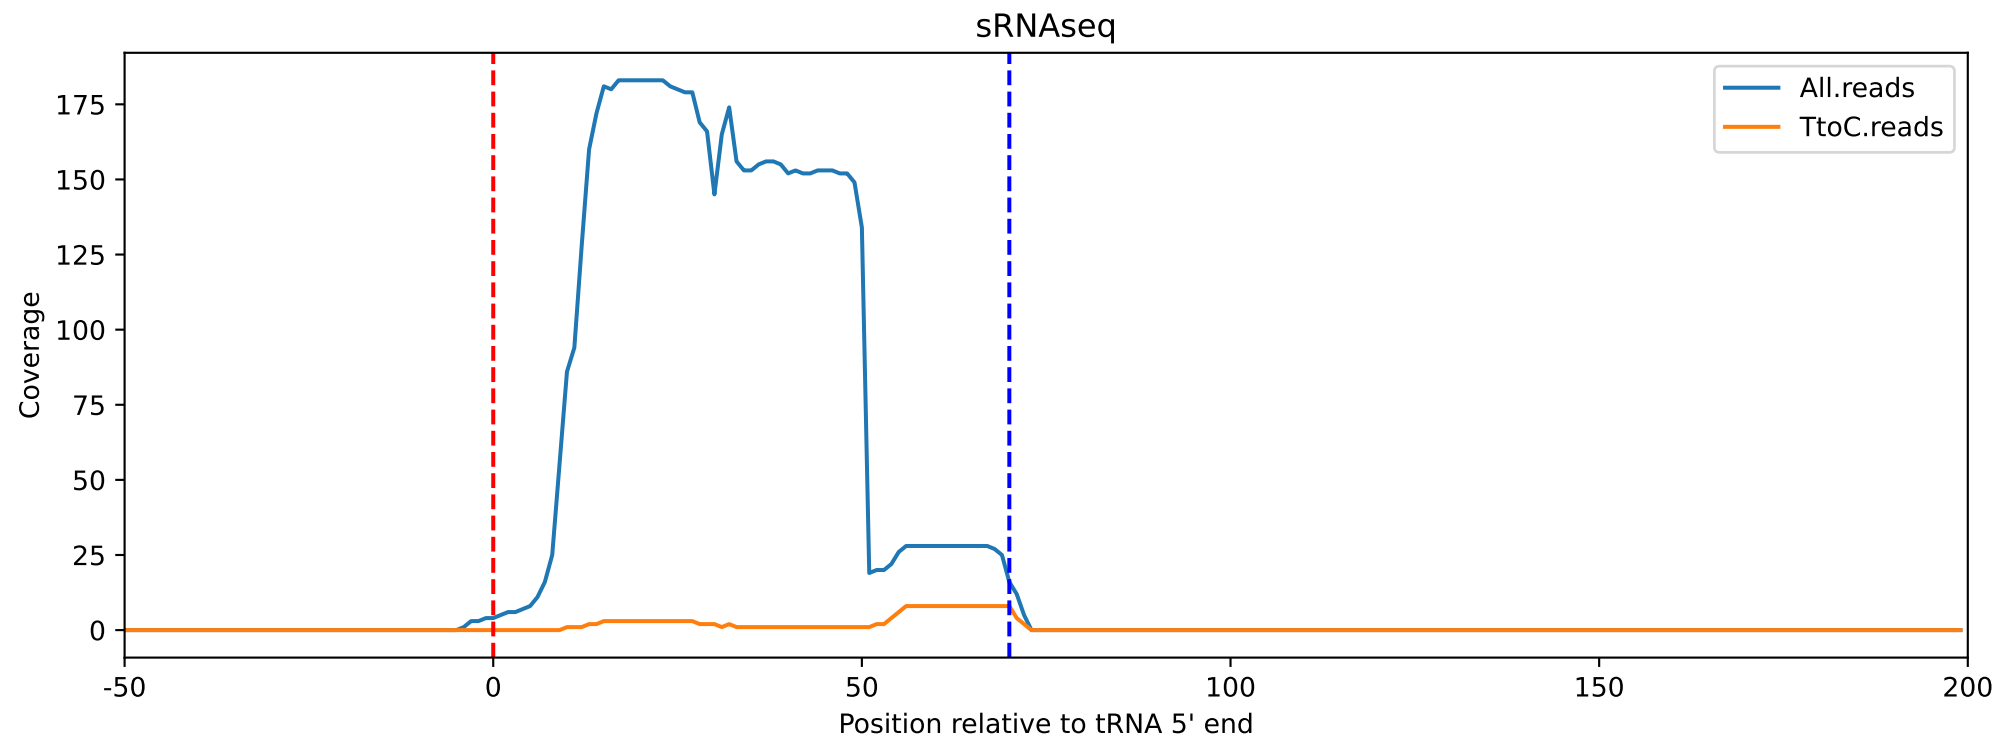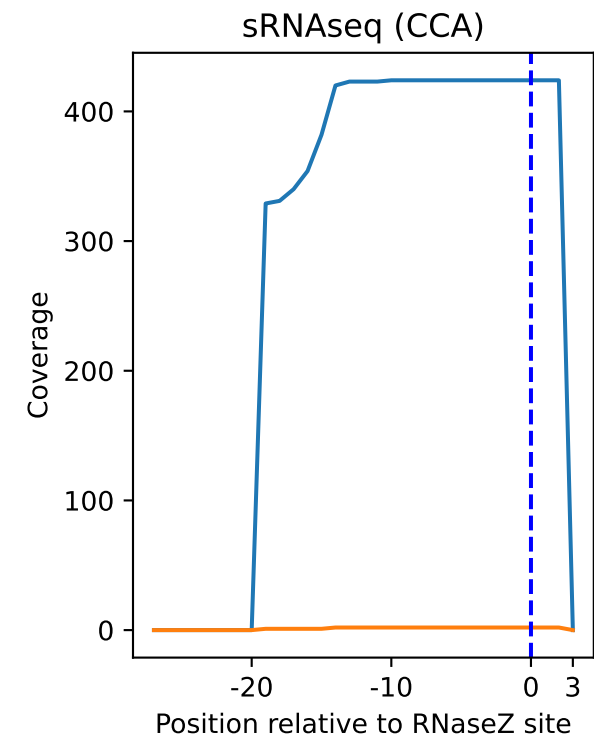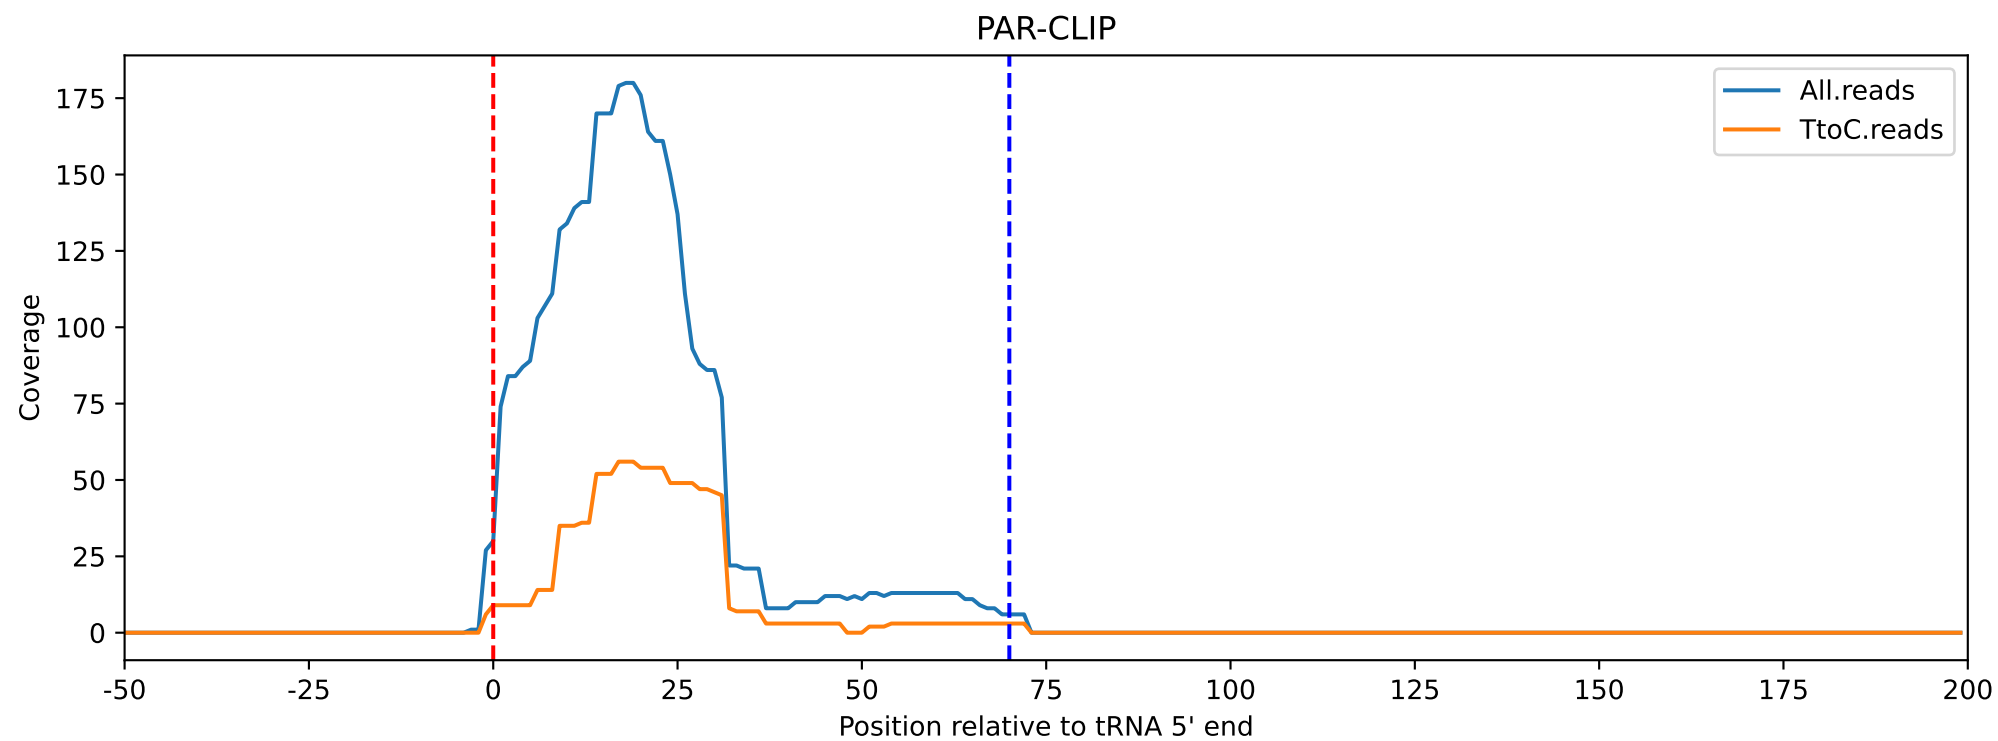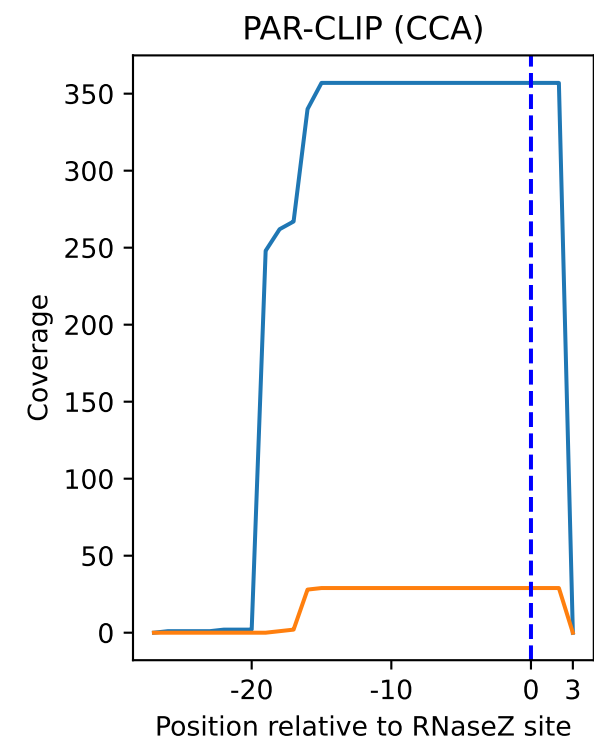

# tRNA-Val-TAC-1-2

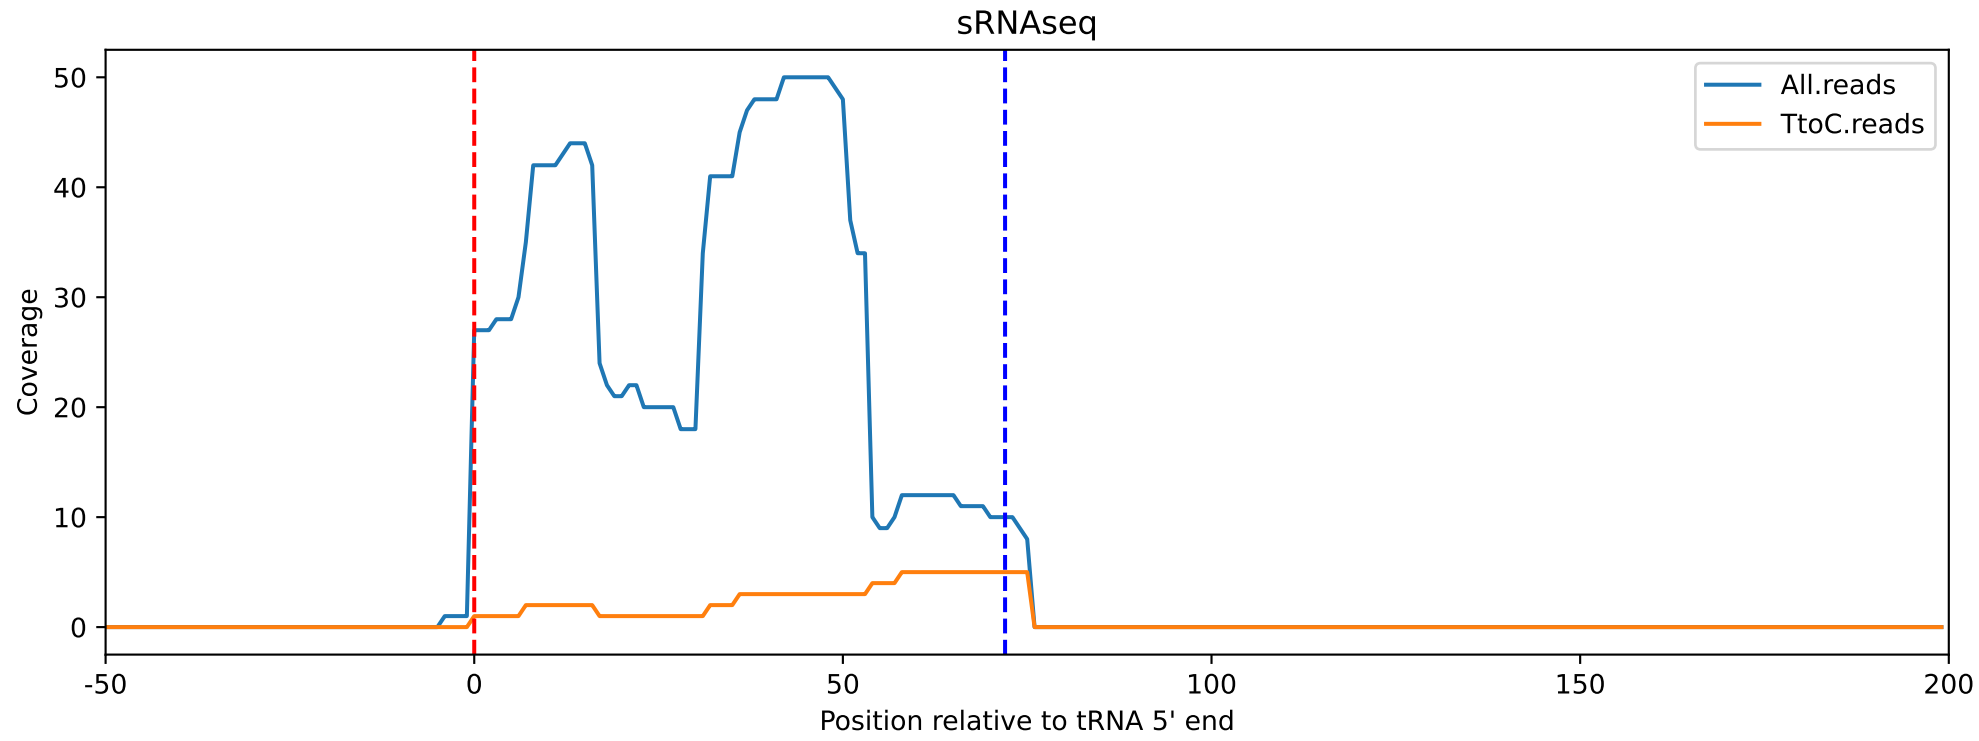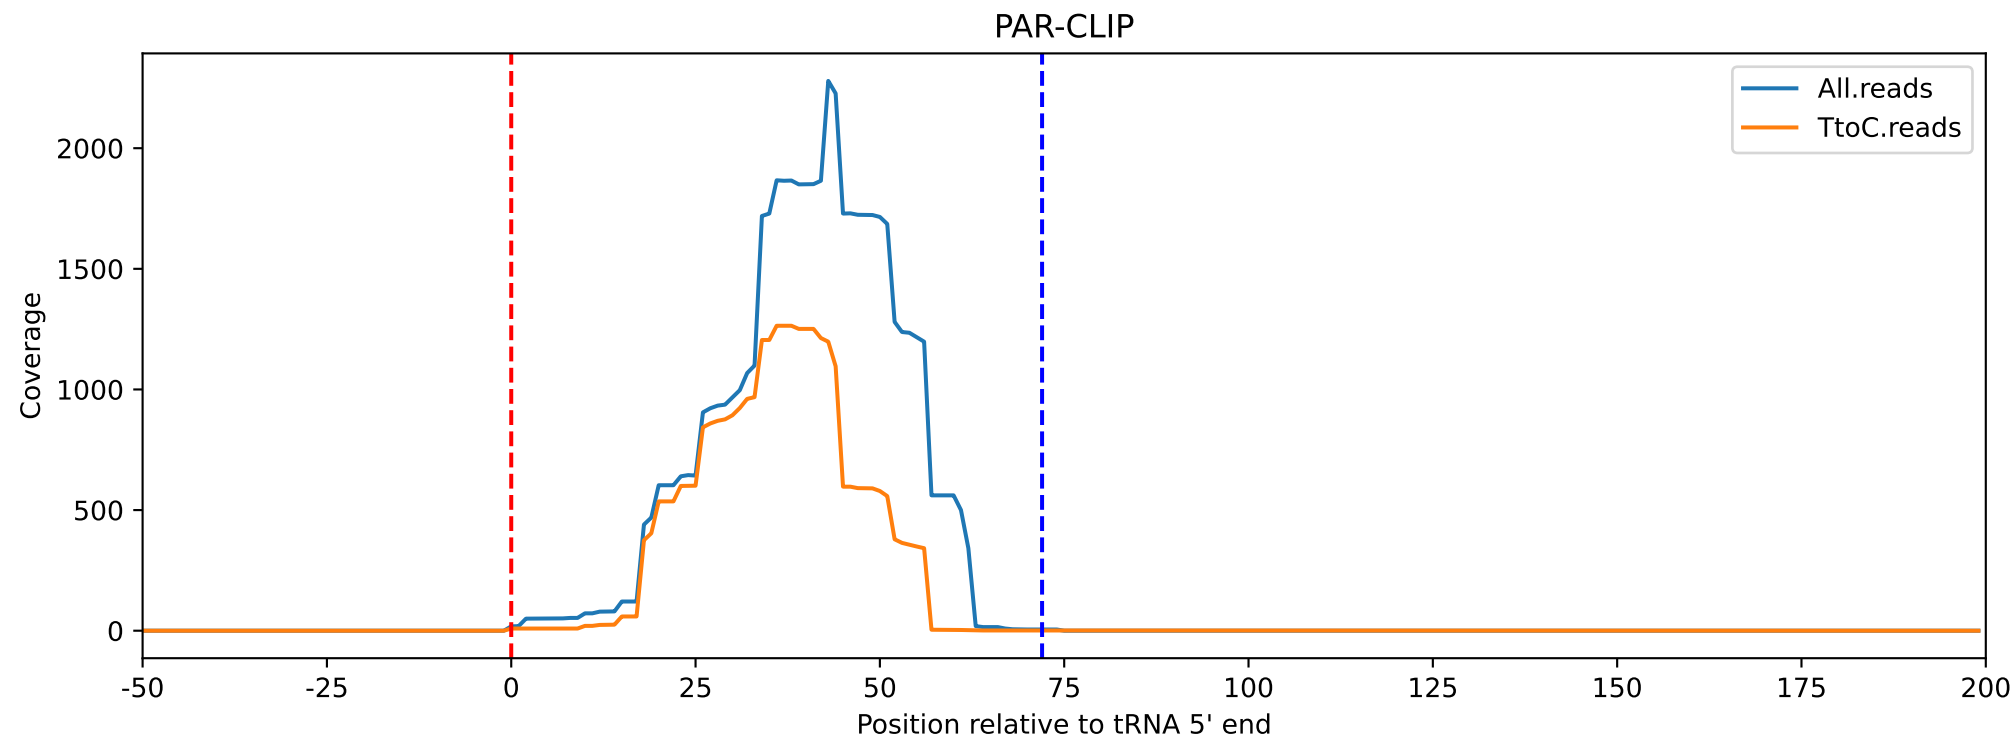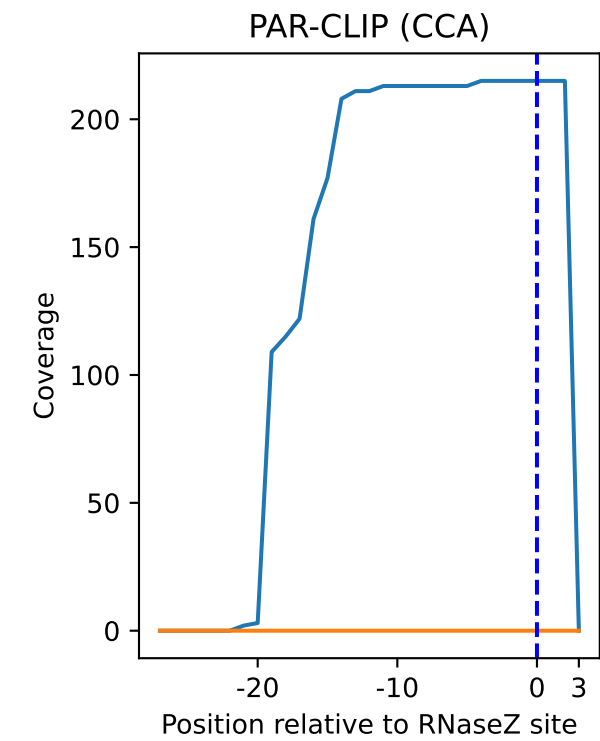

# tRNA-Pro-AGG-1-3

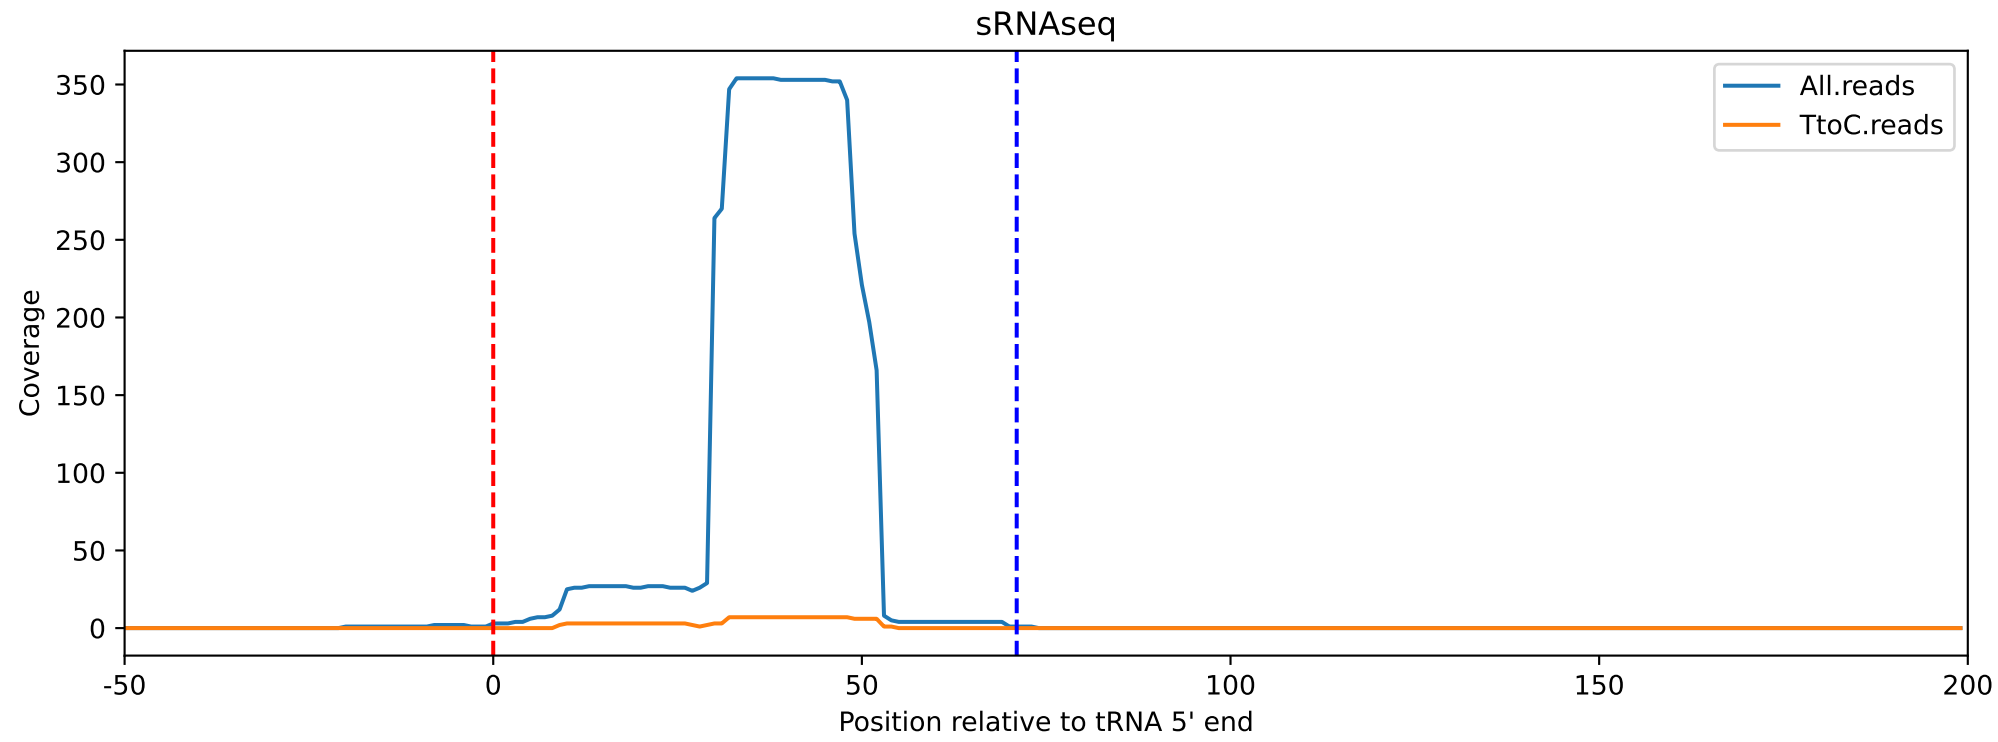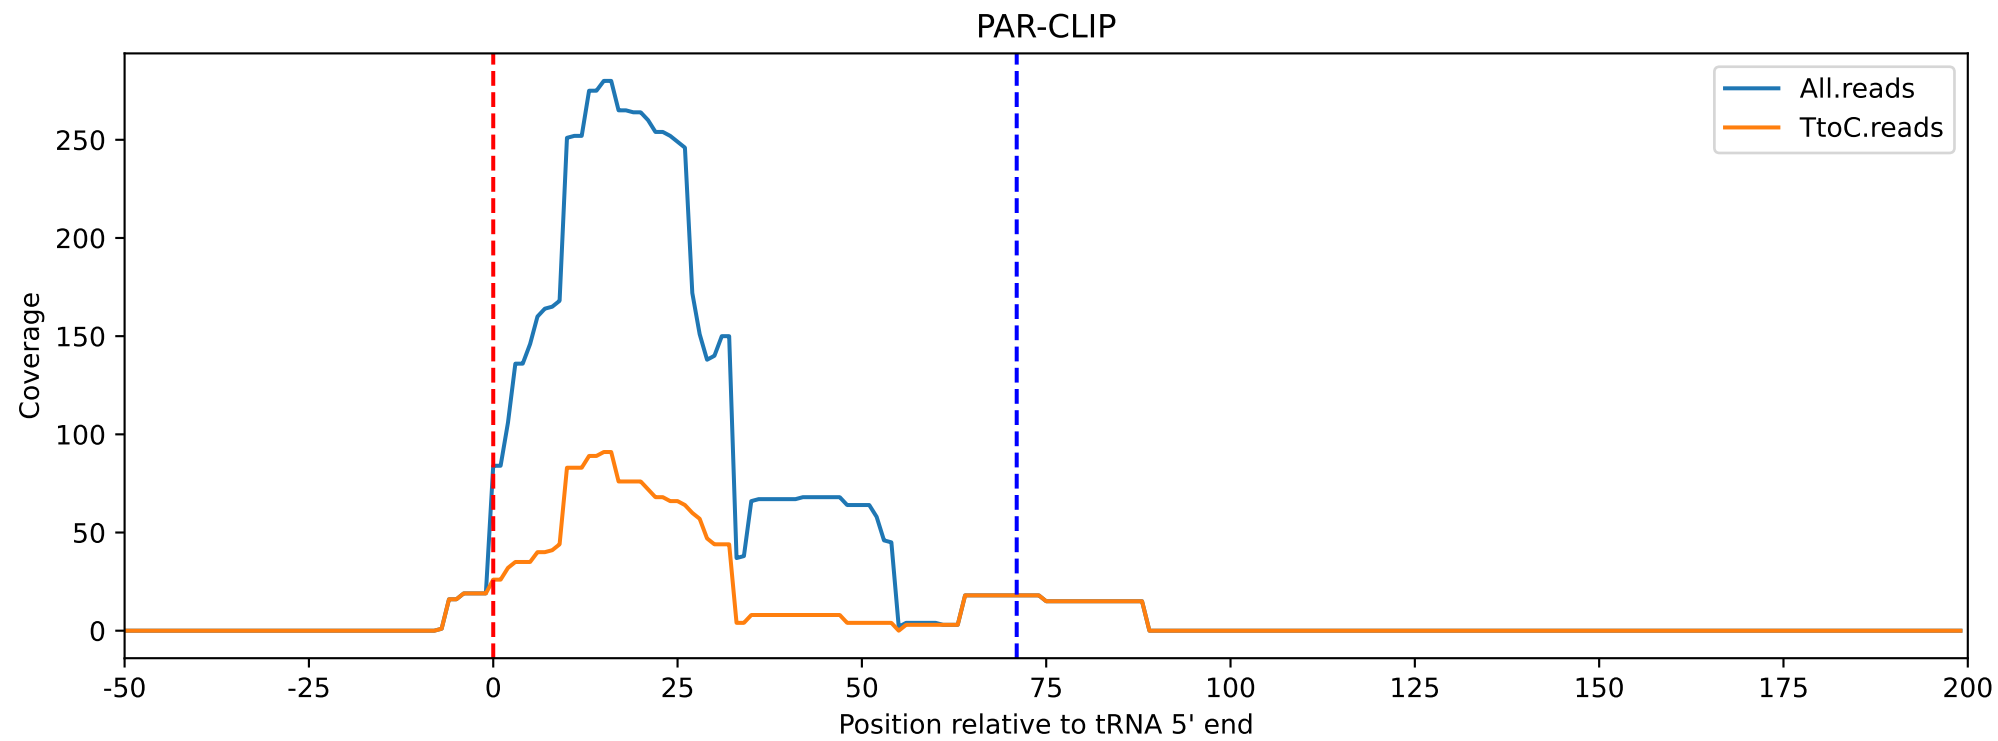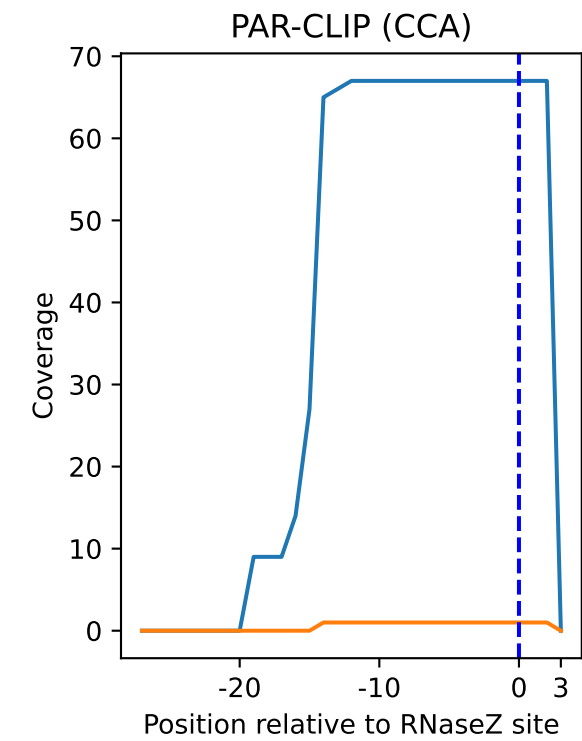

# tRNA-Ile-AAT-1-8

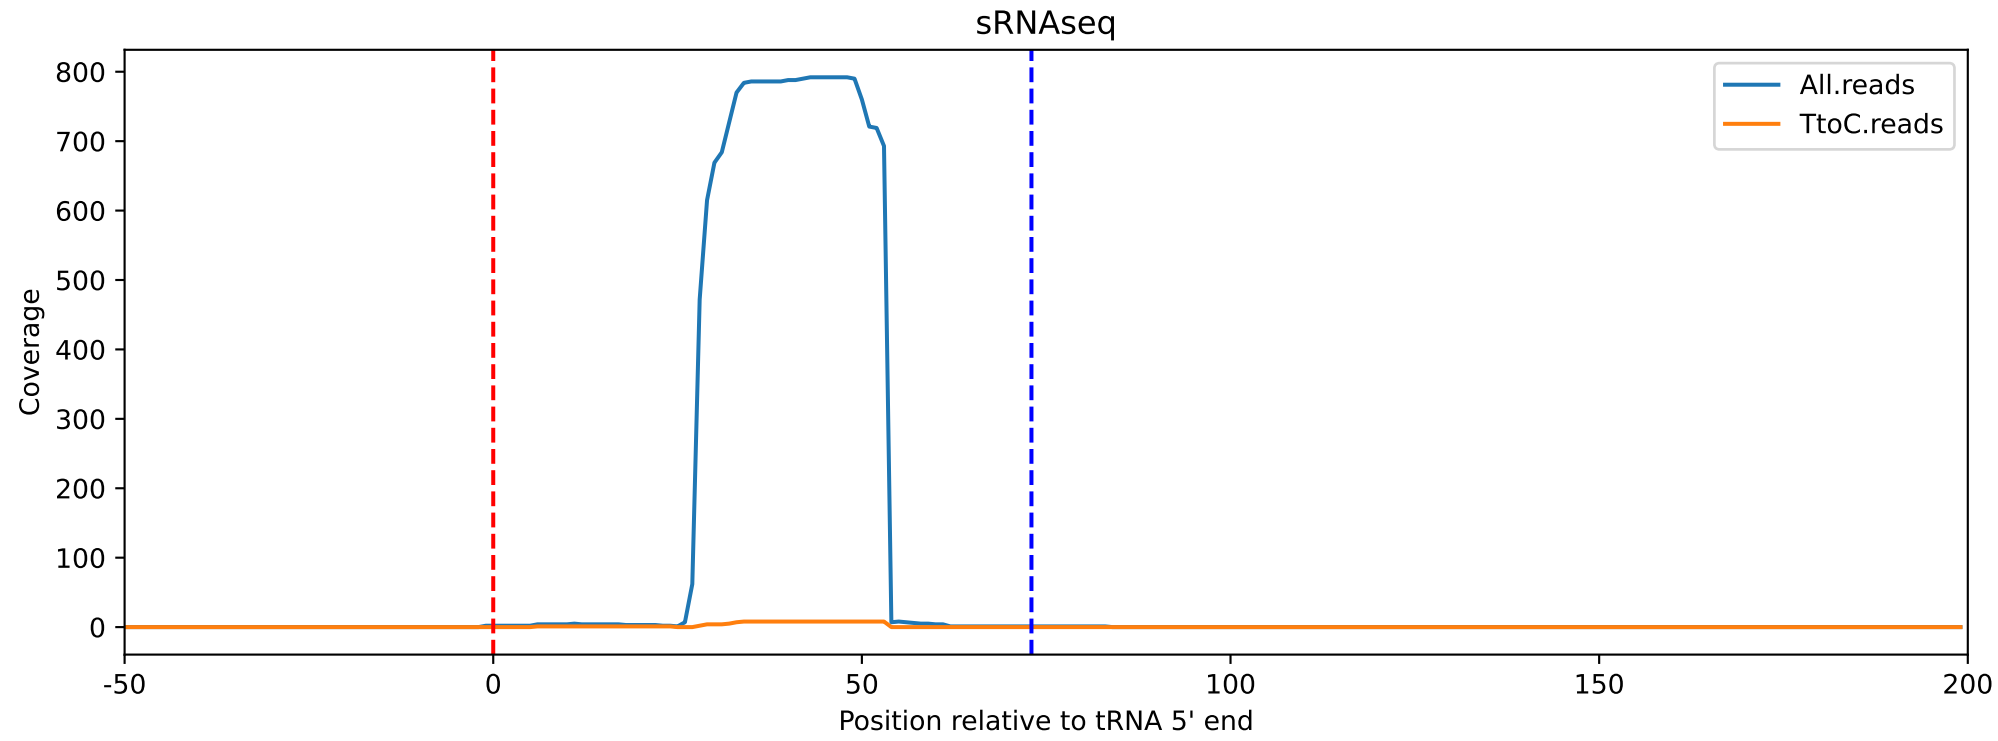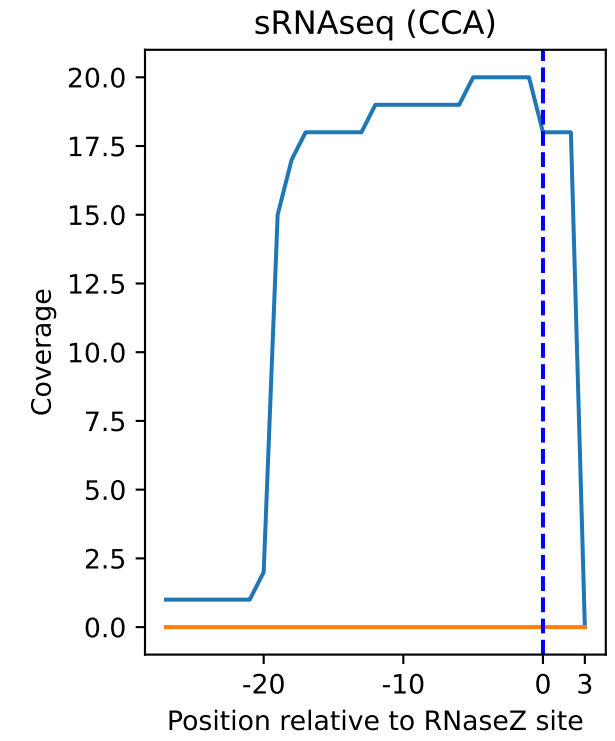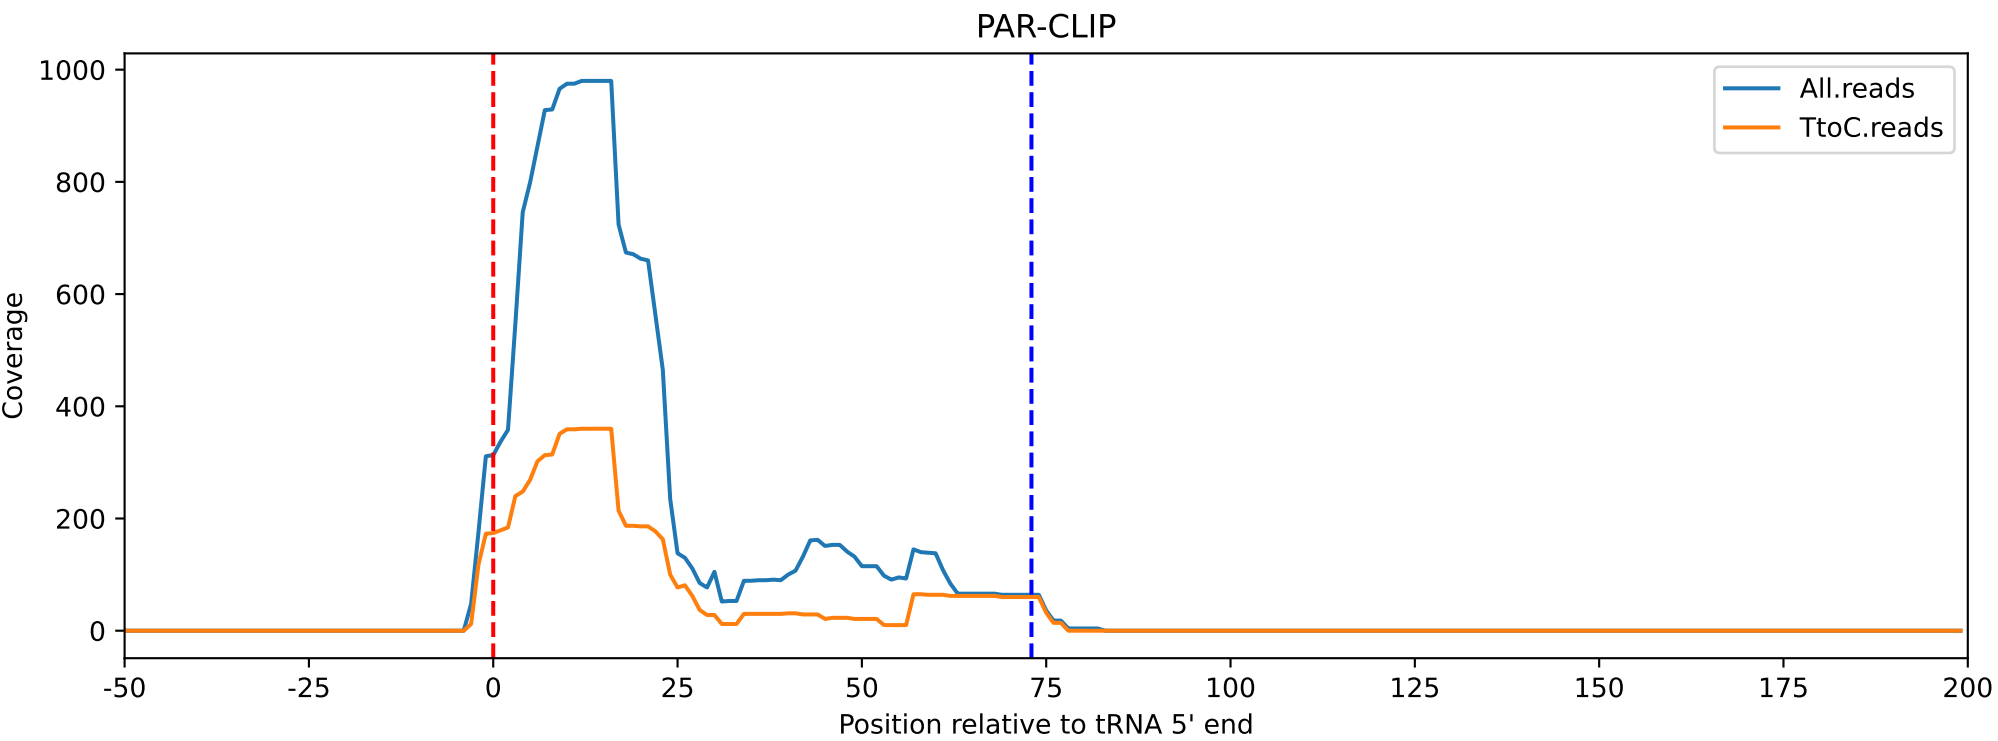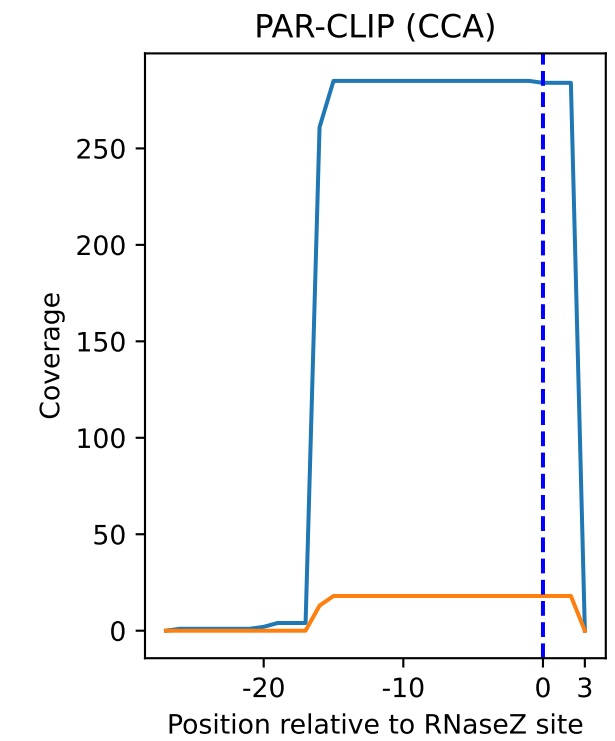

# tRNA-Gly-GCC-1-9

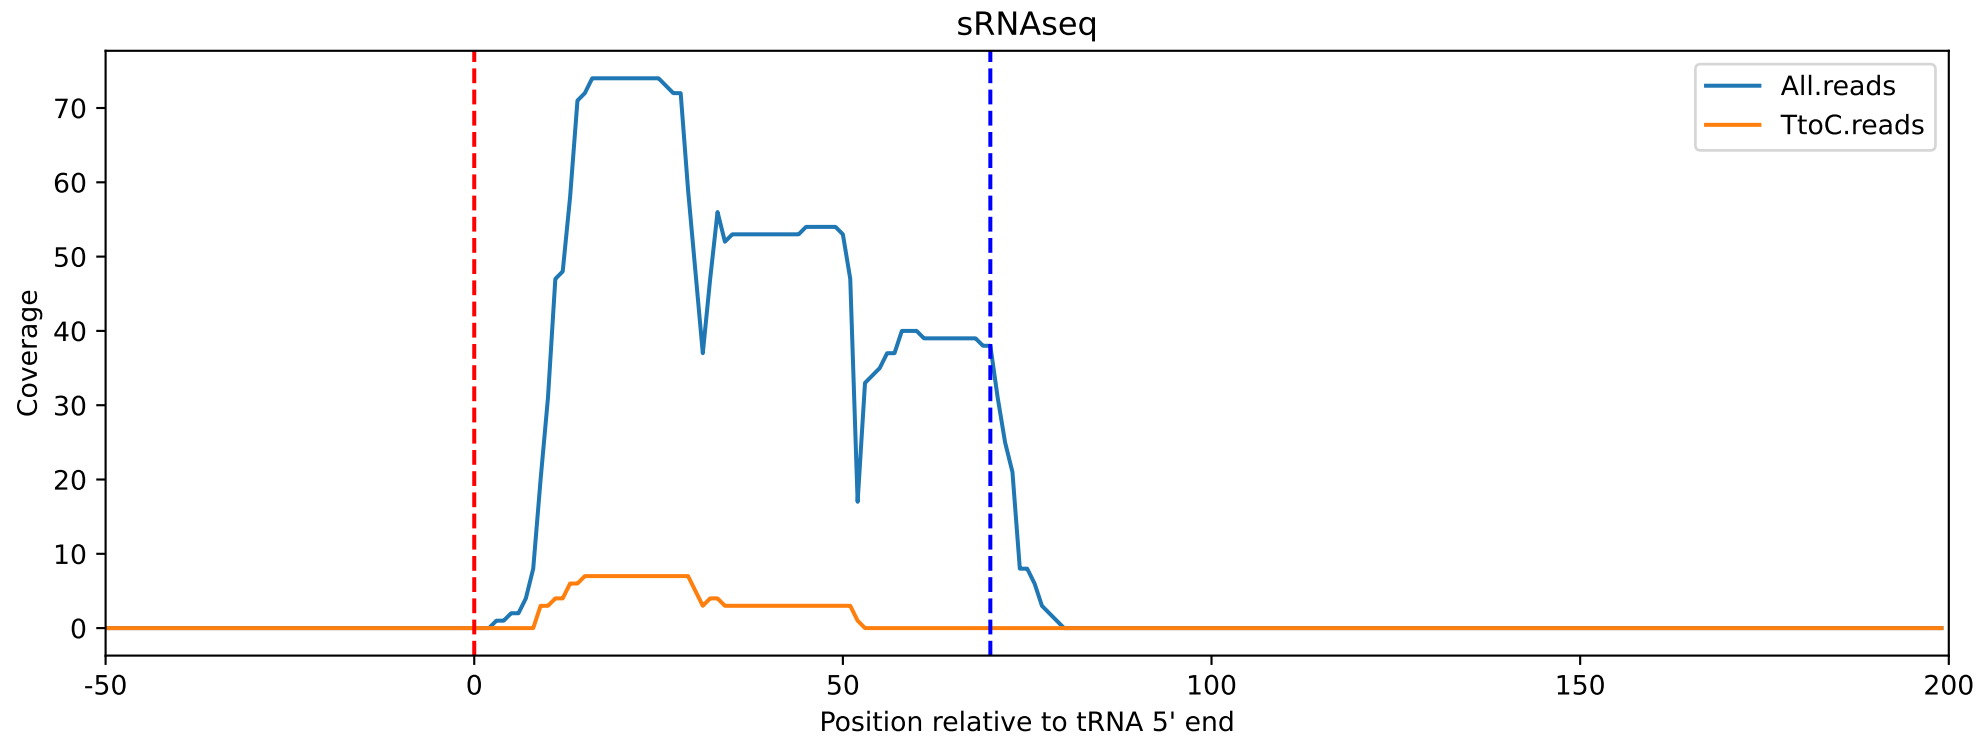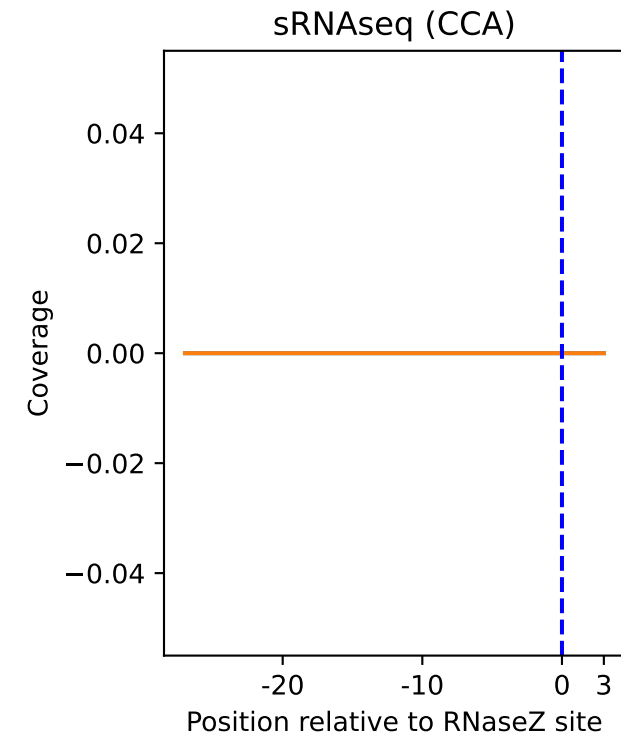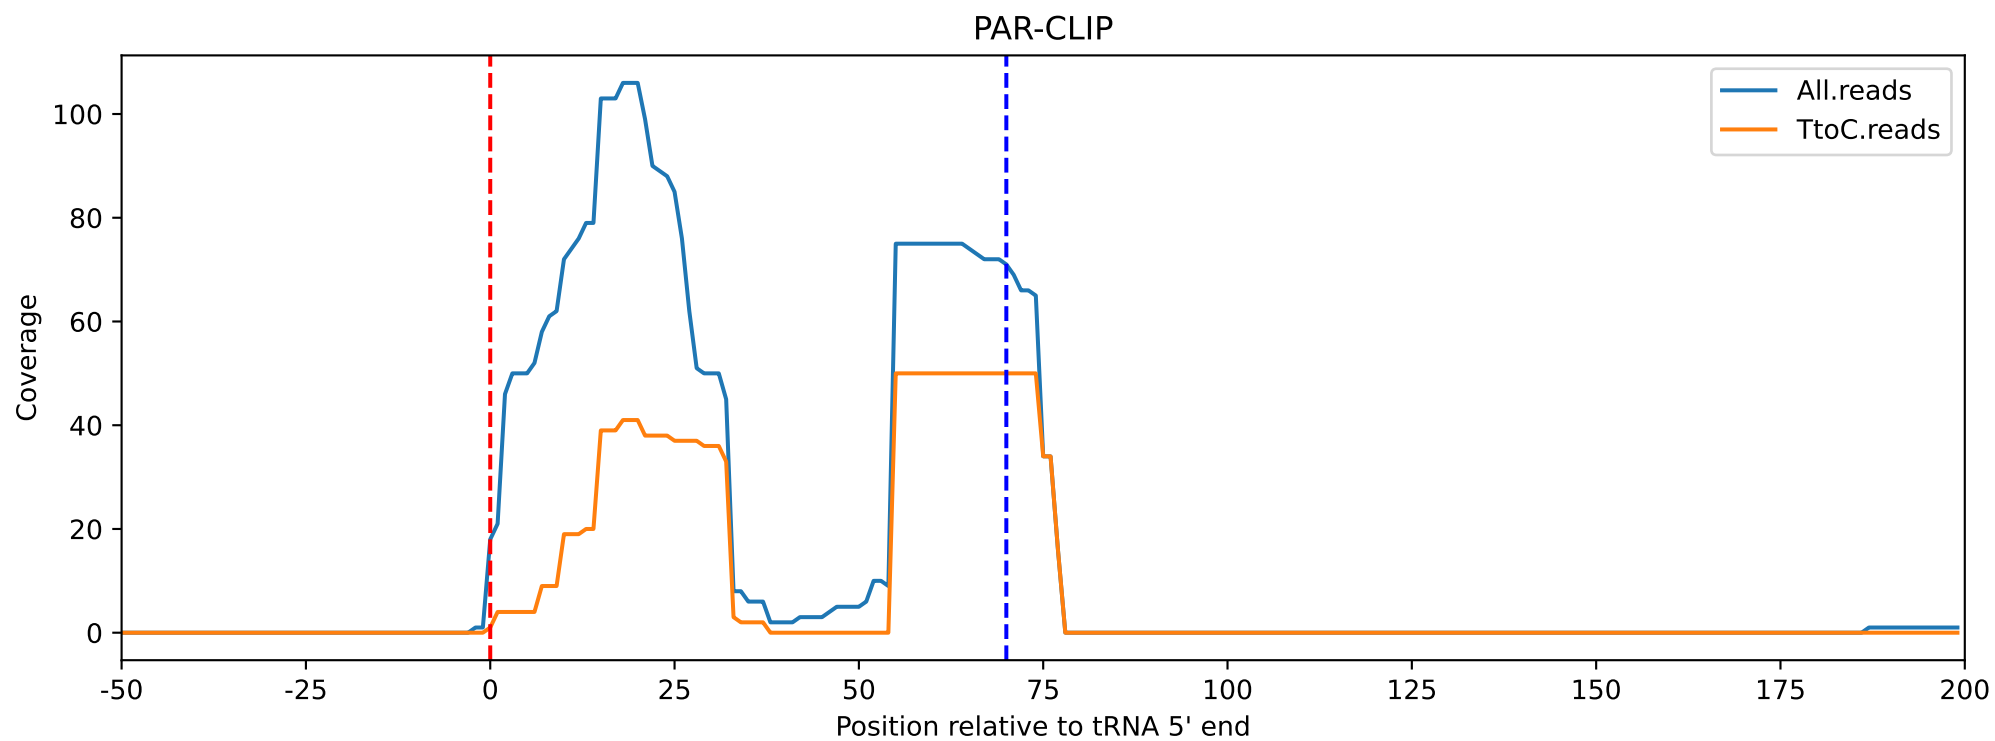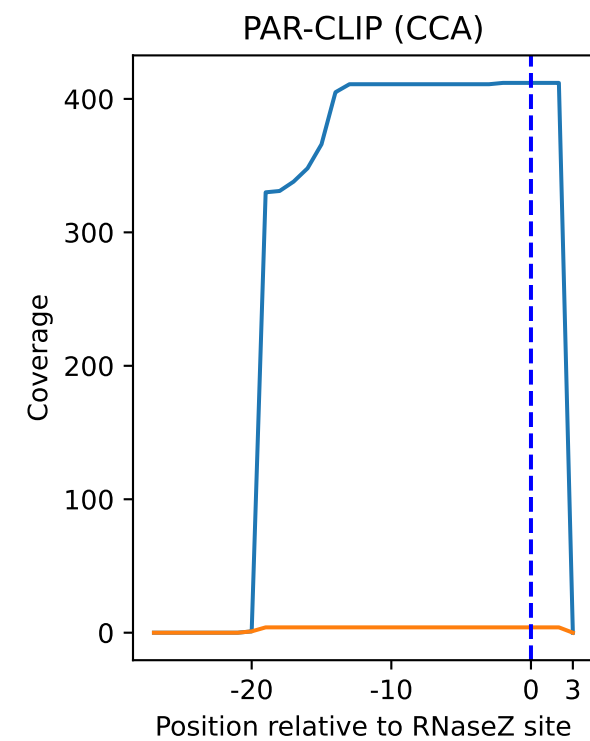



# tRNA-Phe-GAA-1-5

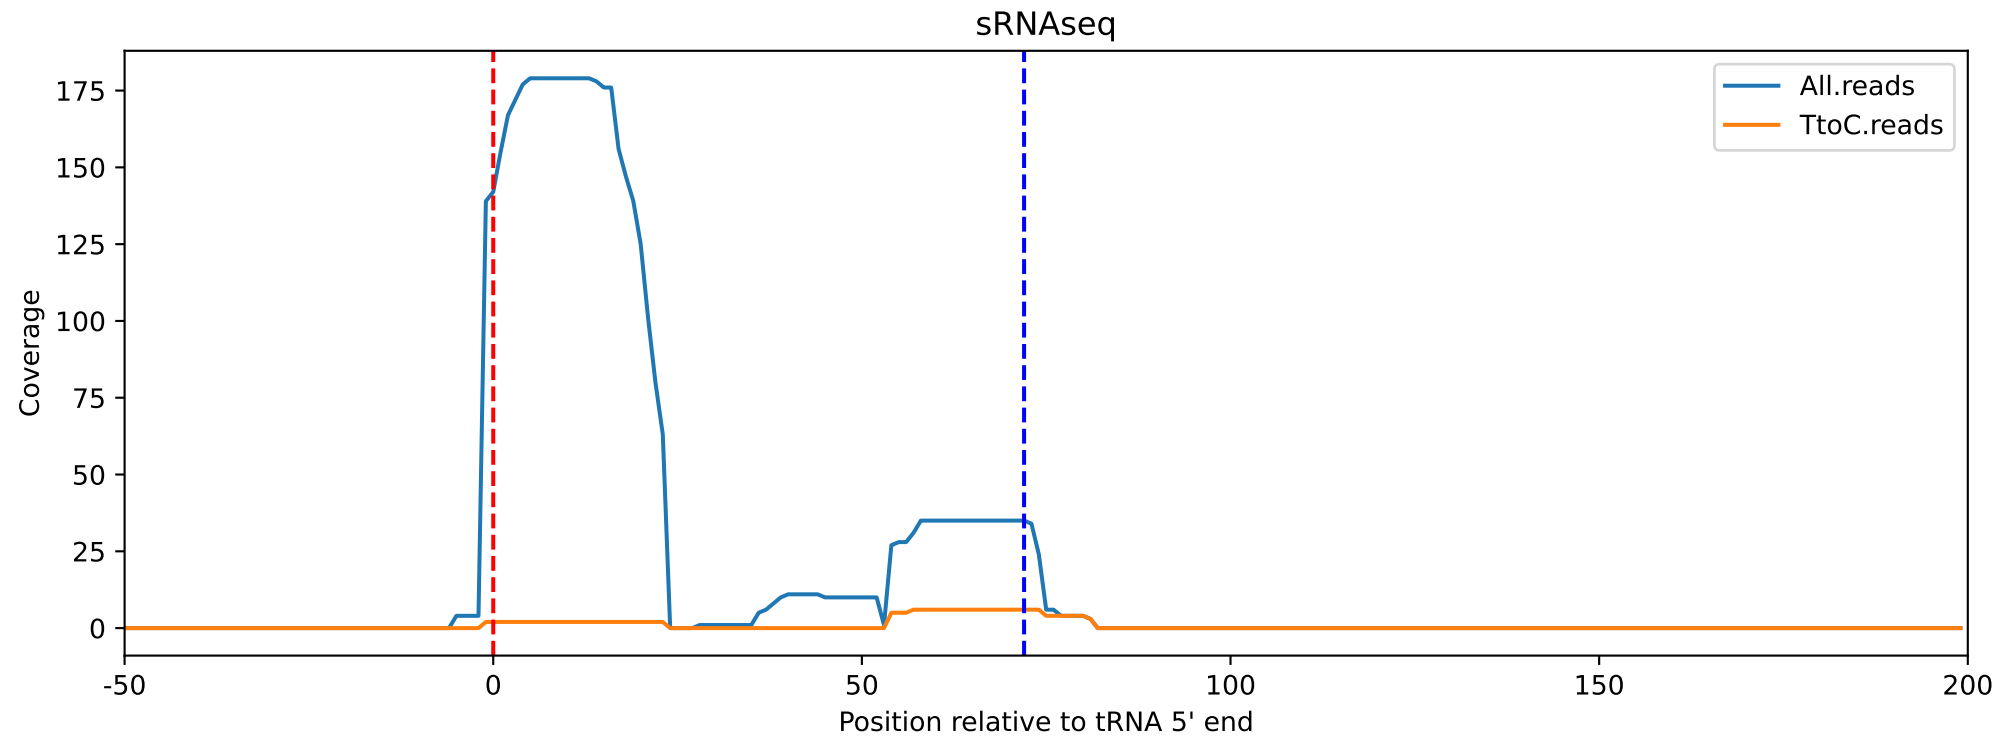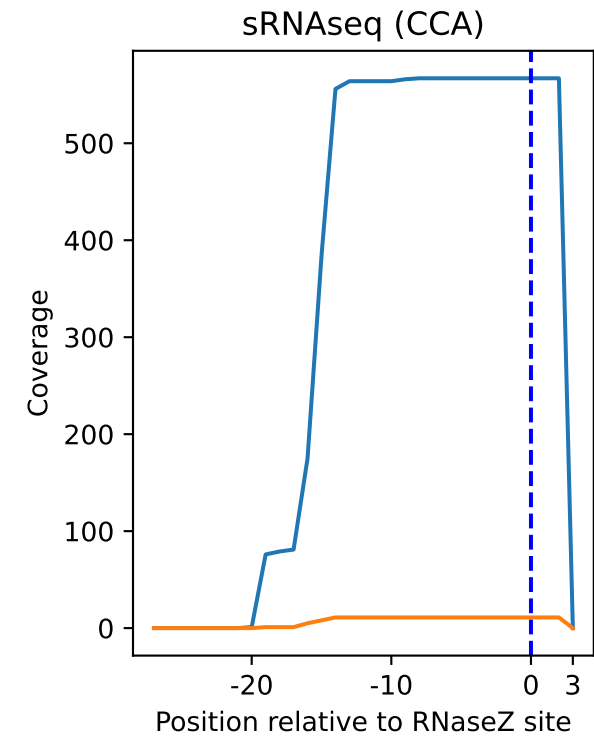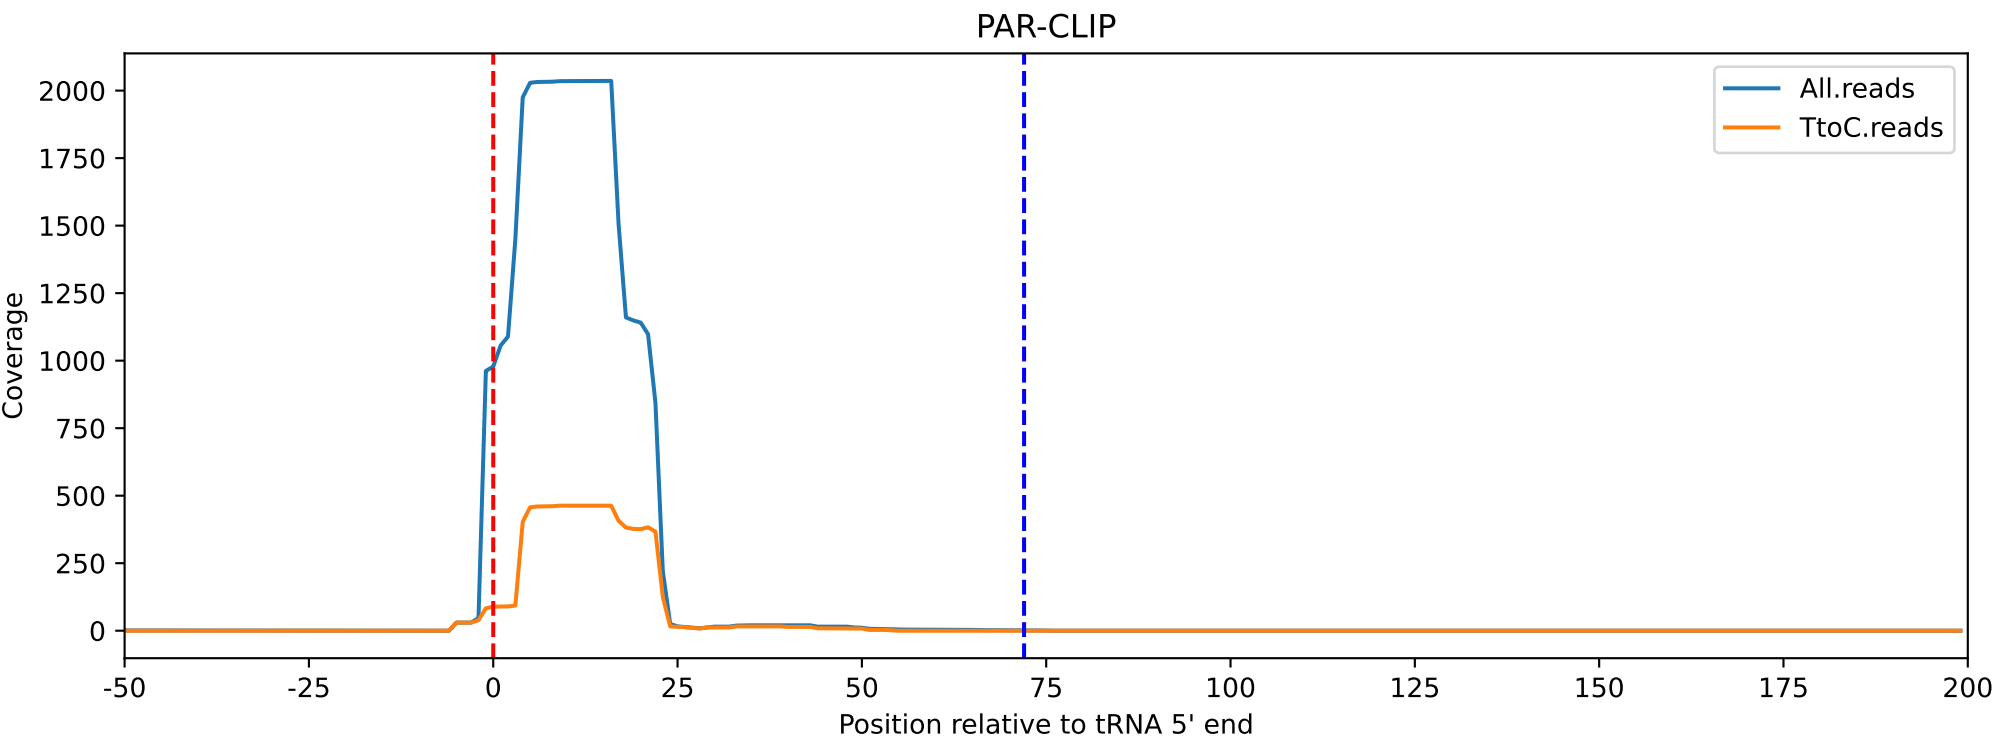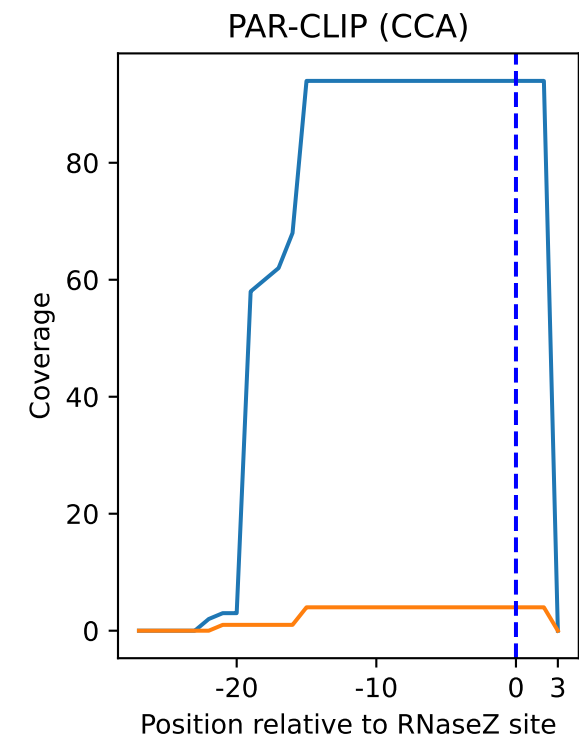

# tRNA-Pro-TGG-1-2

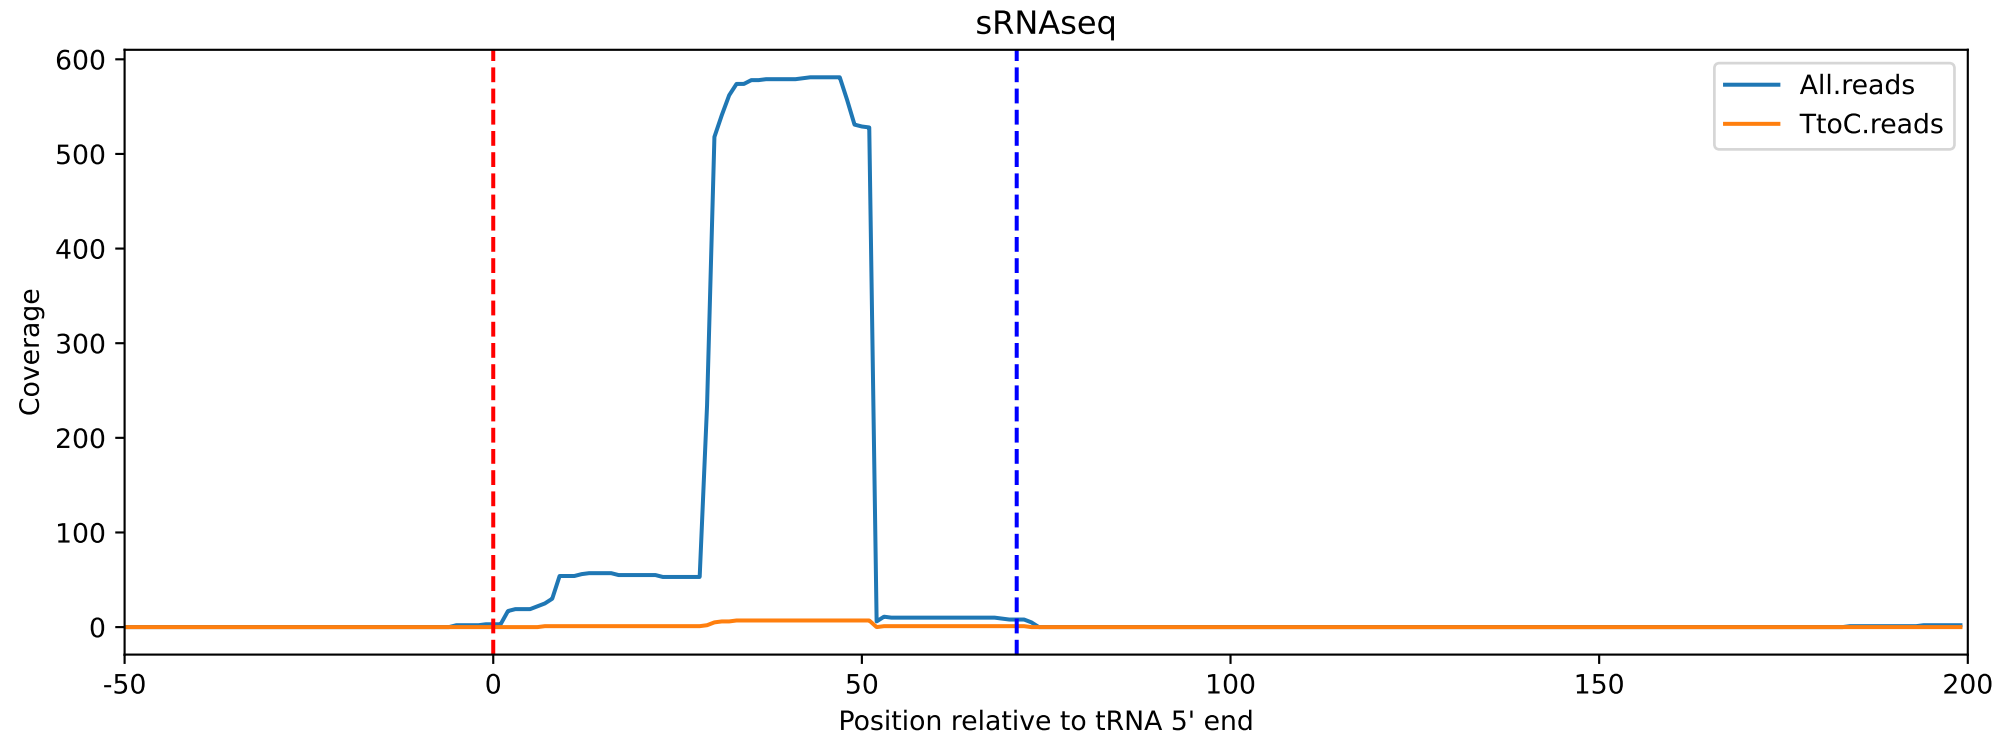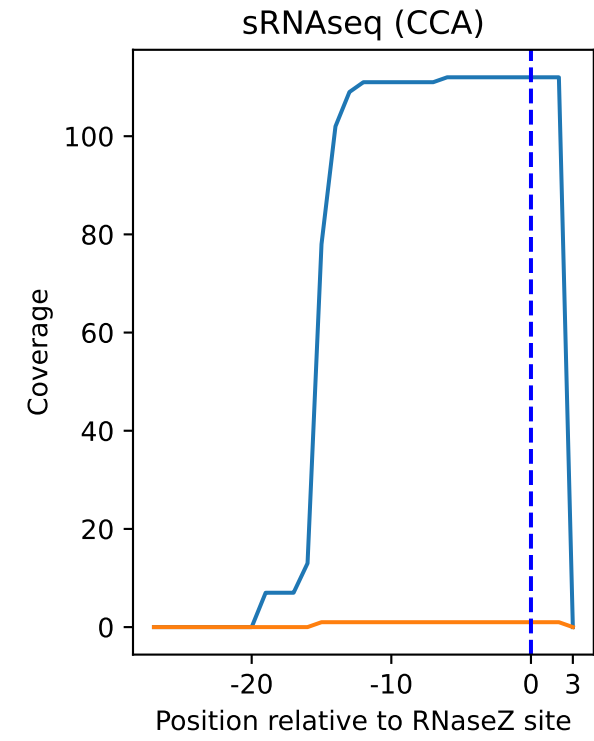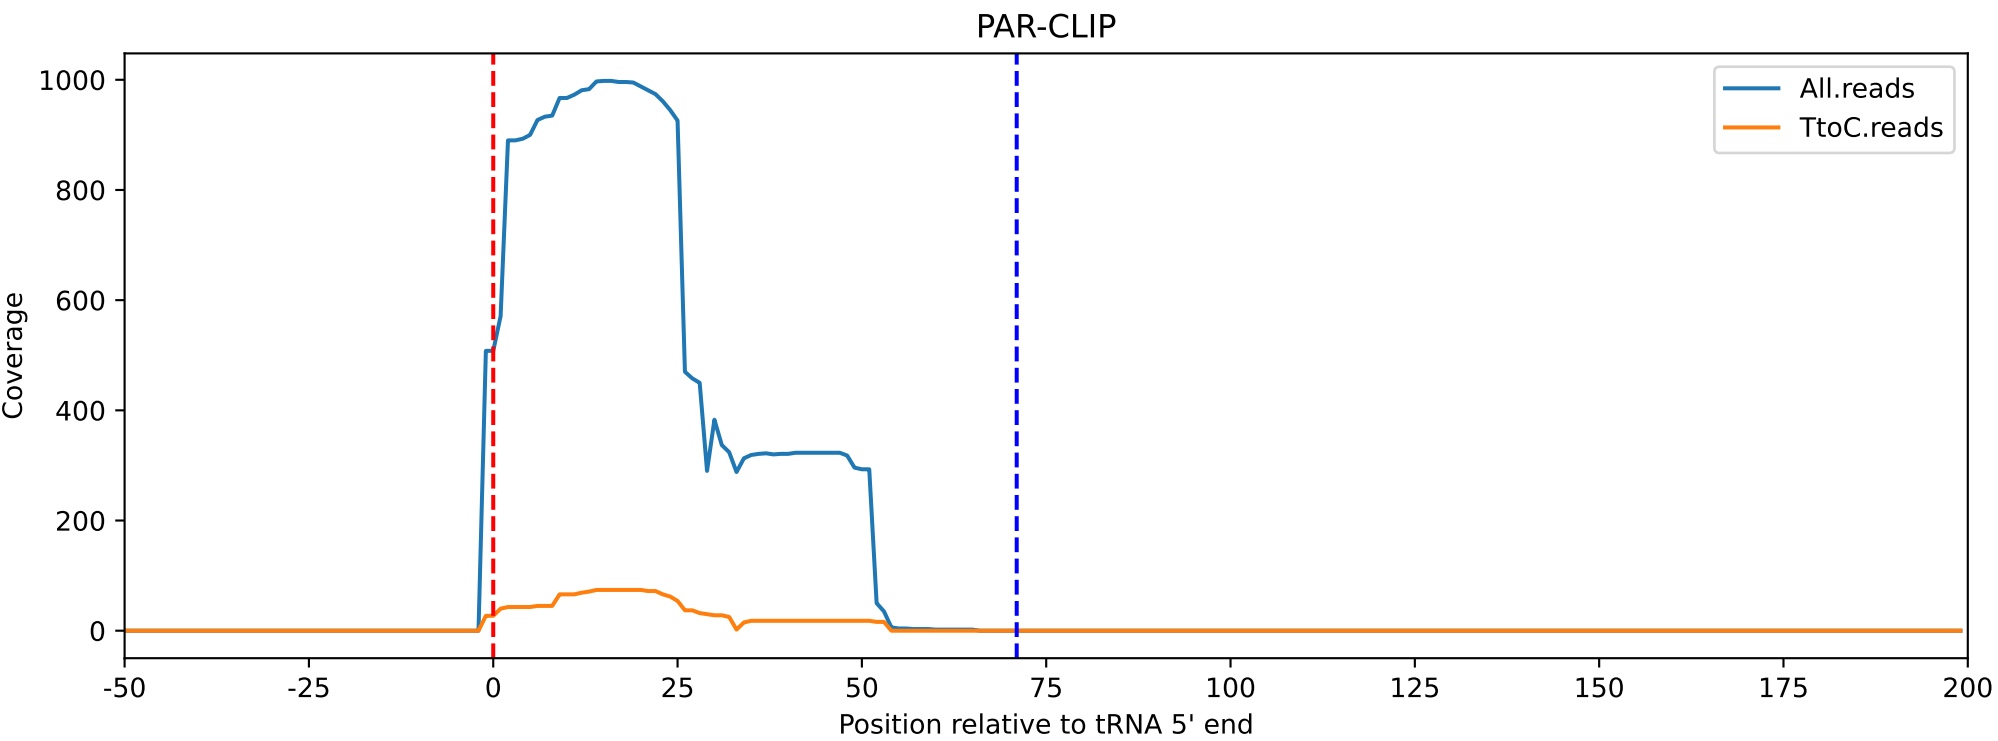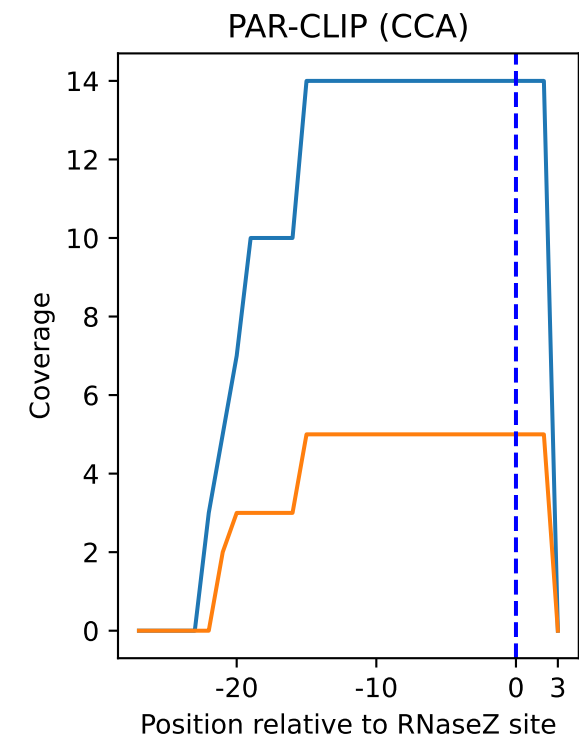

# tRNA-Phe-GAA-1-7

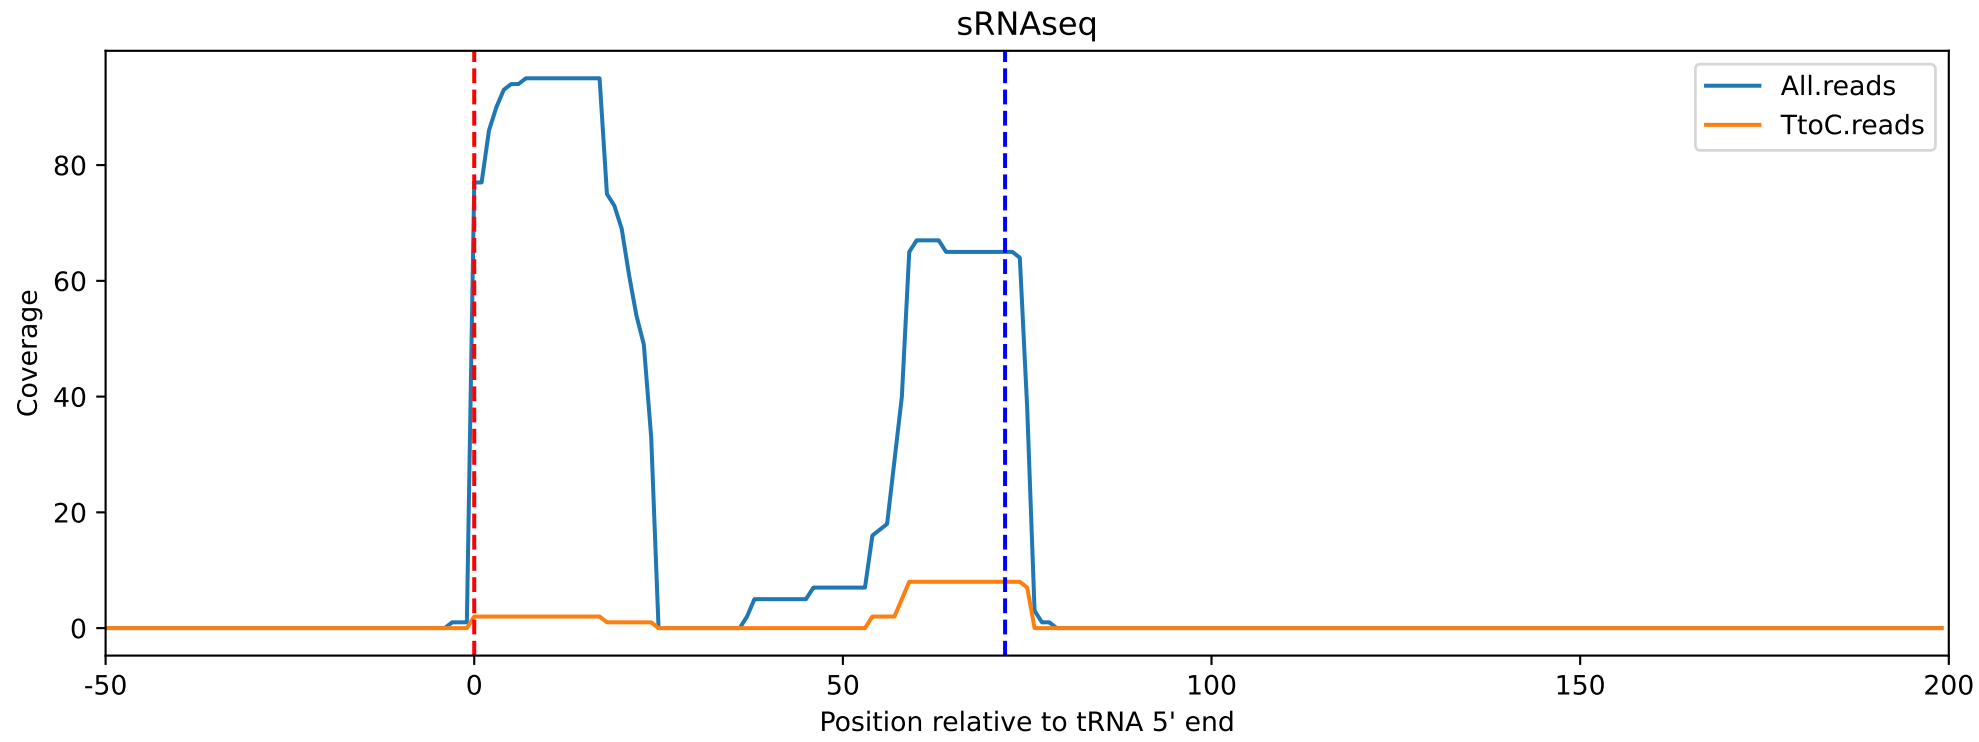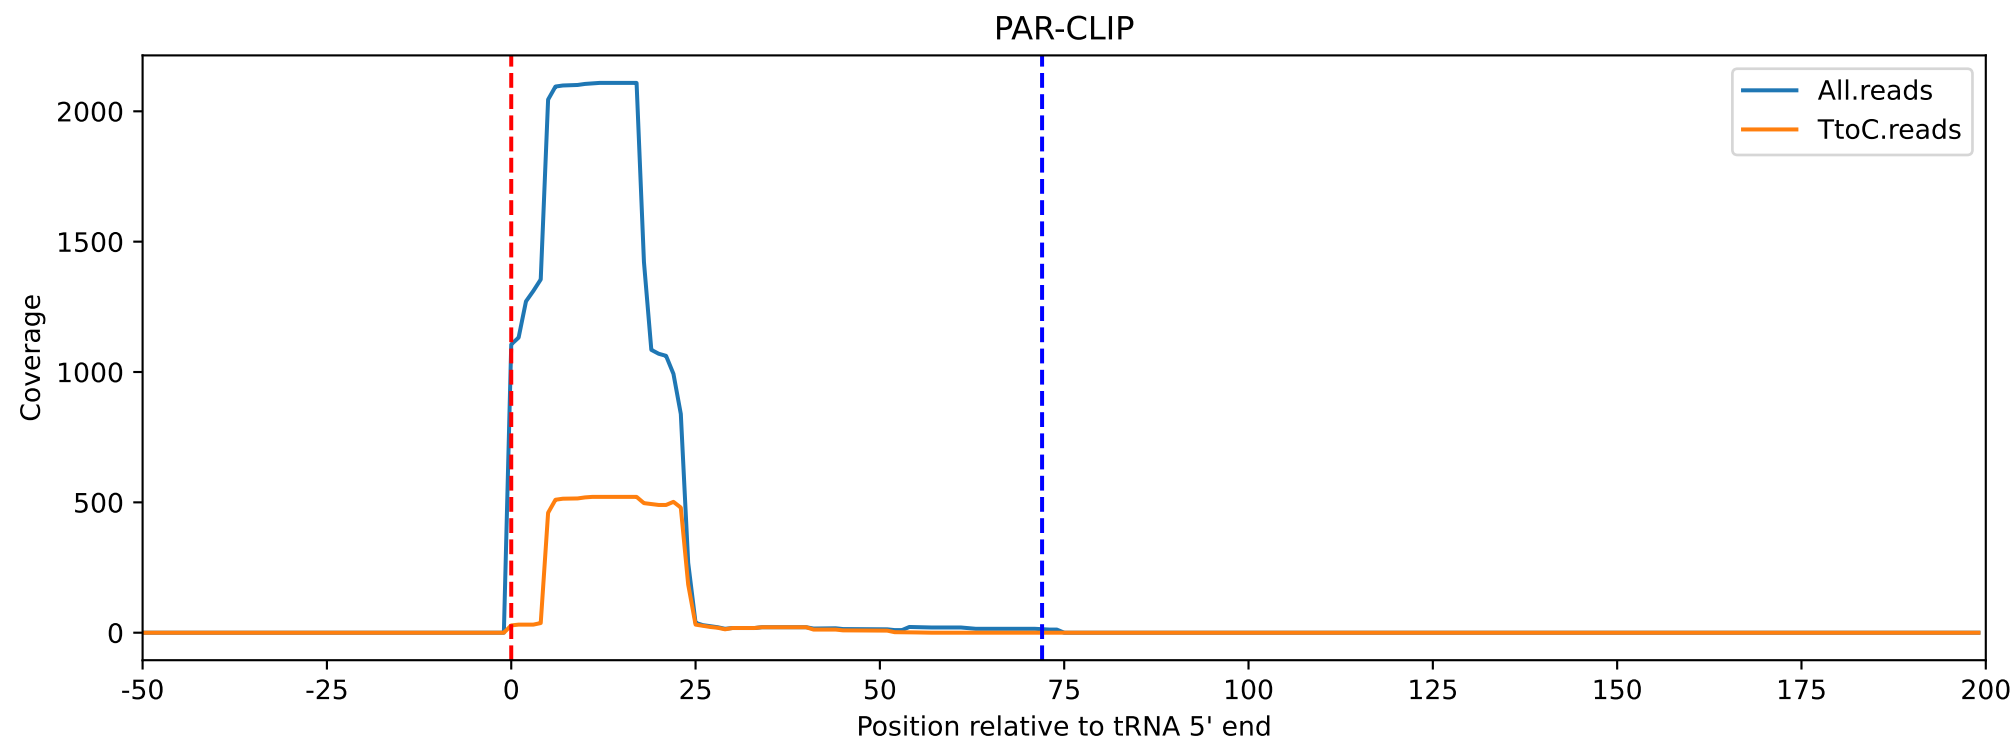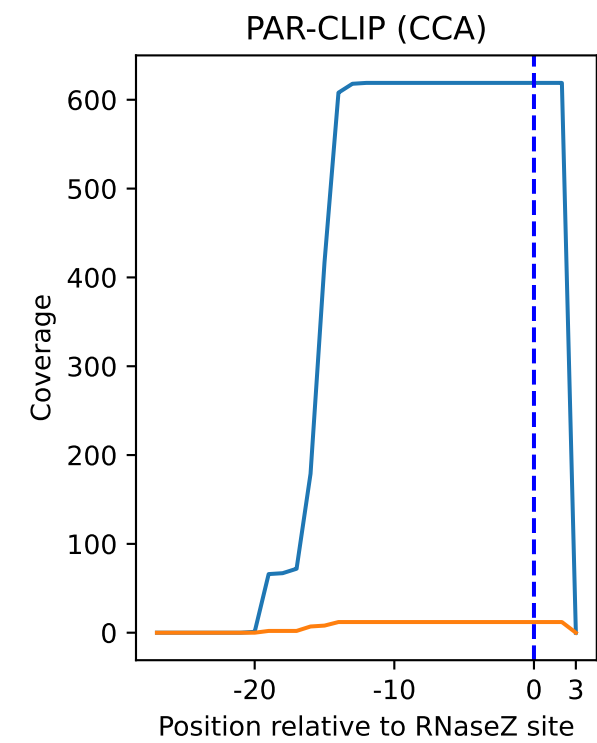

# tRNA-Met-CAT-2-1

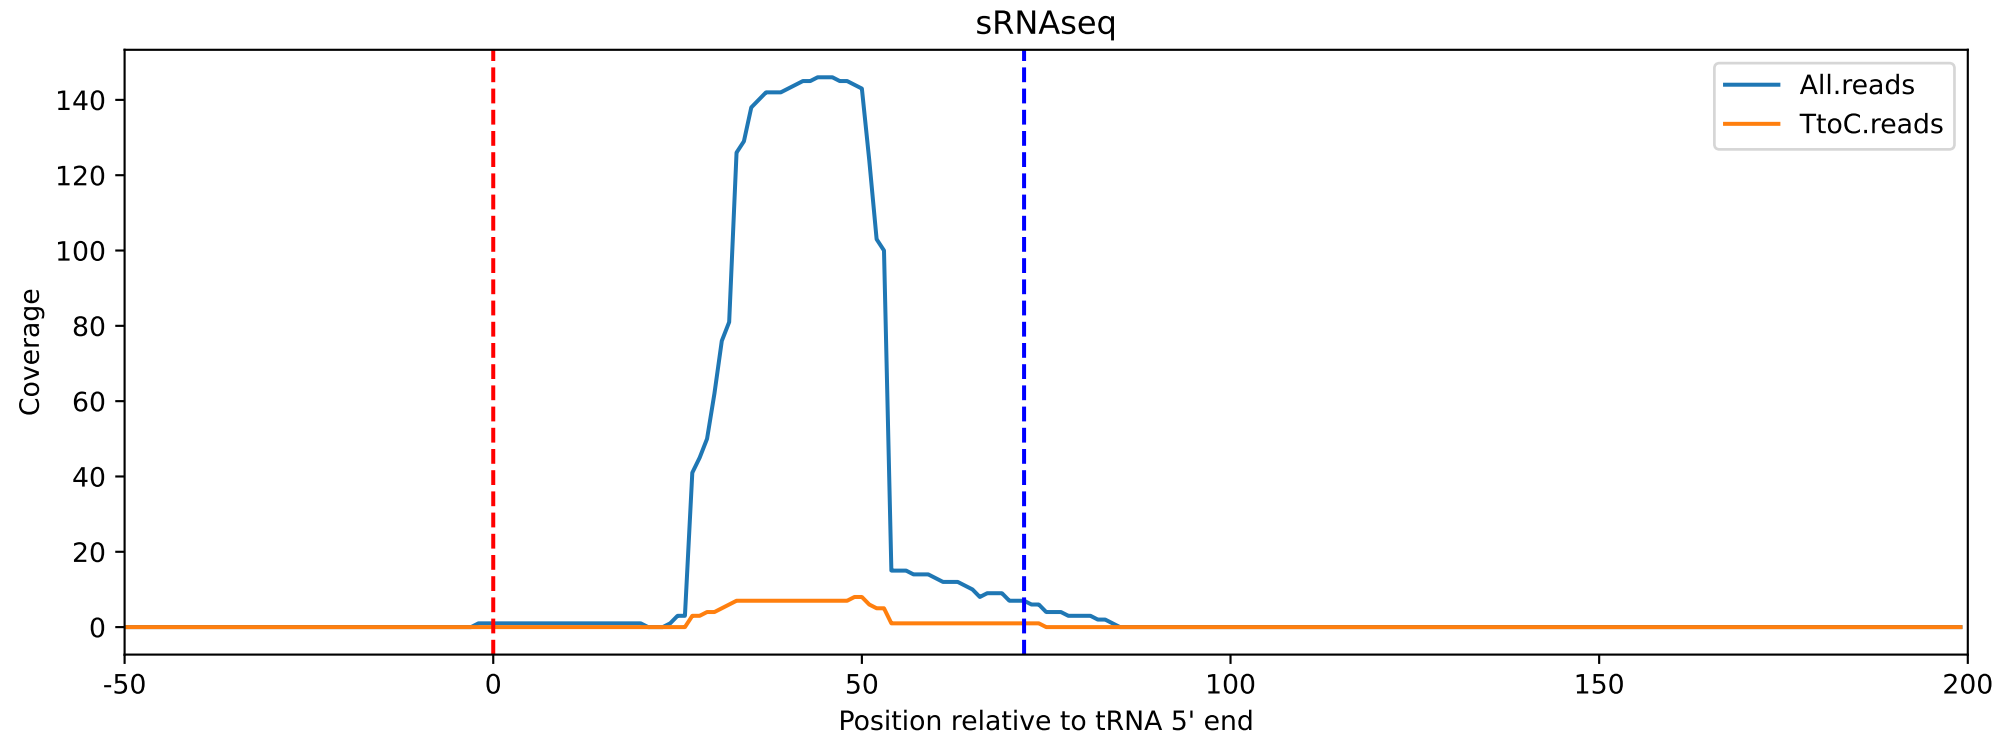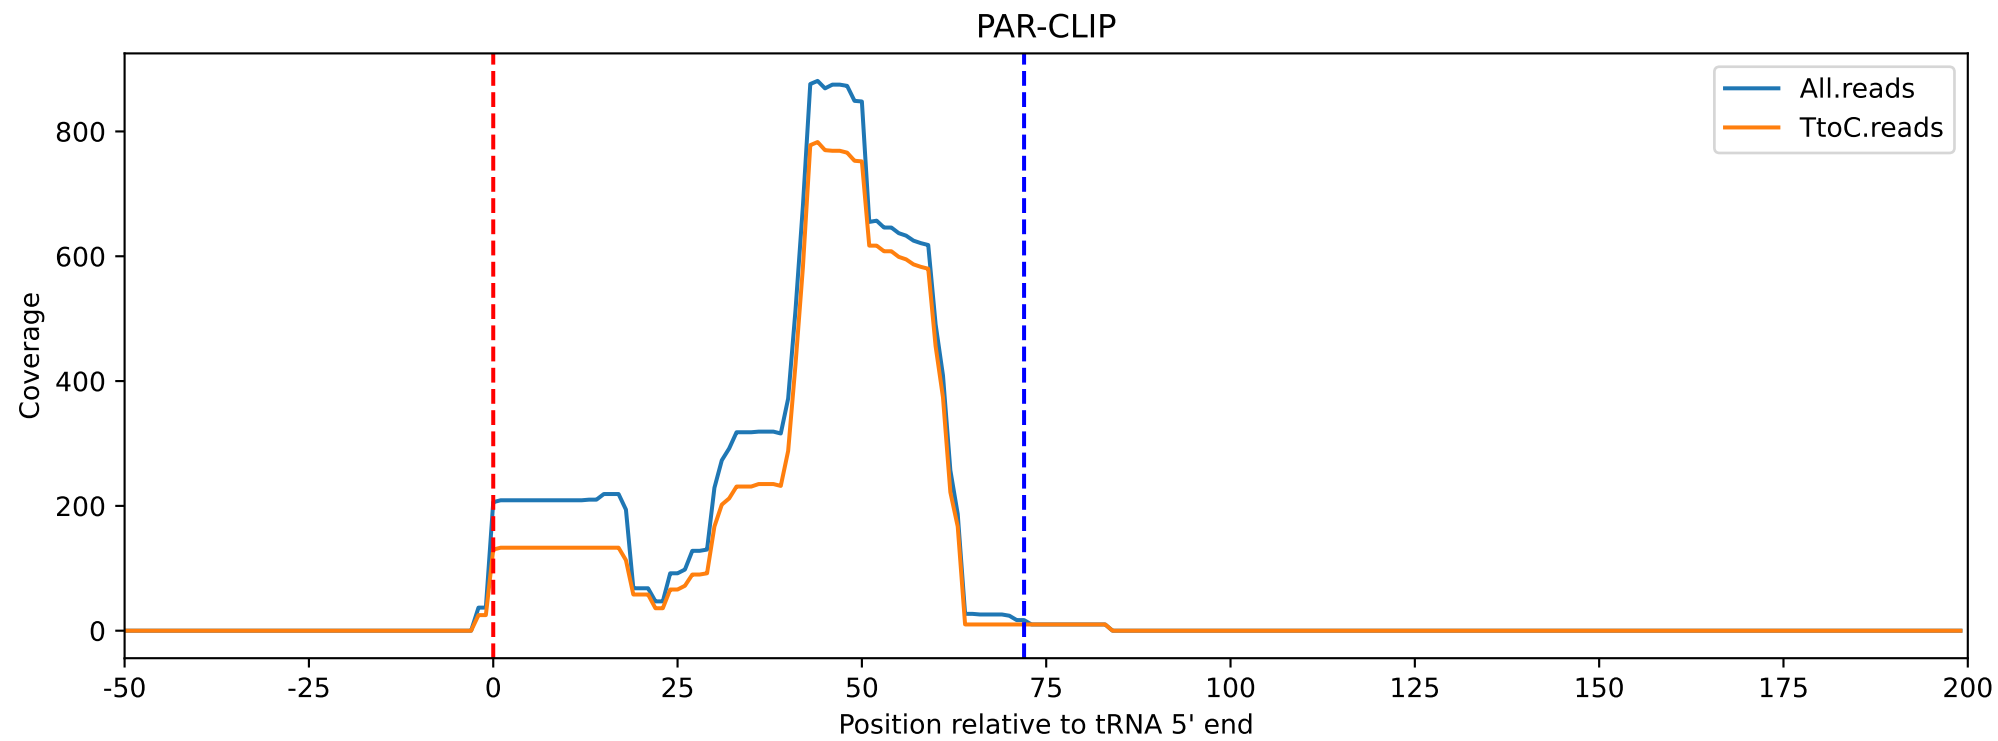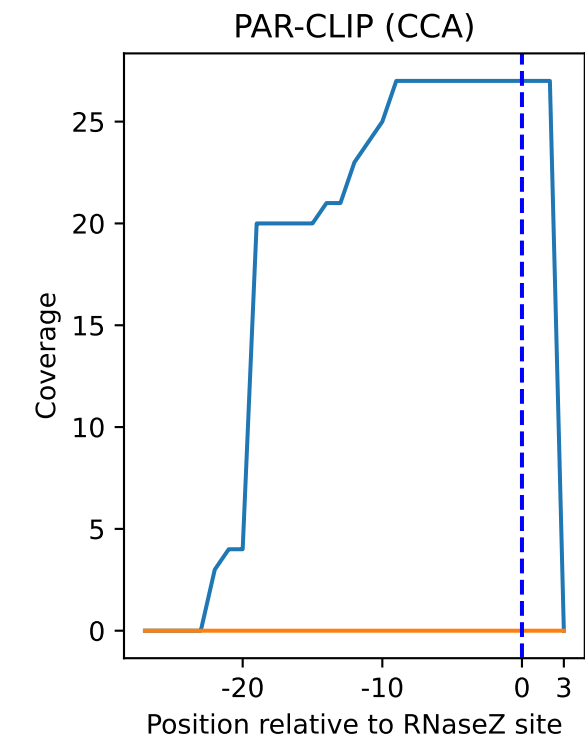

# tRNA-Arg-CCT-1-3

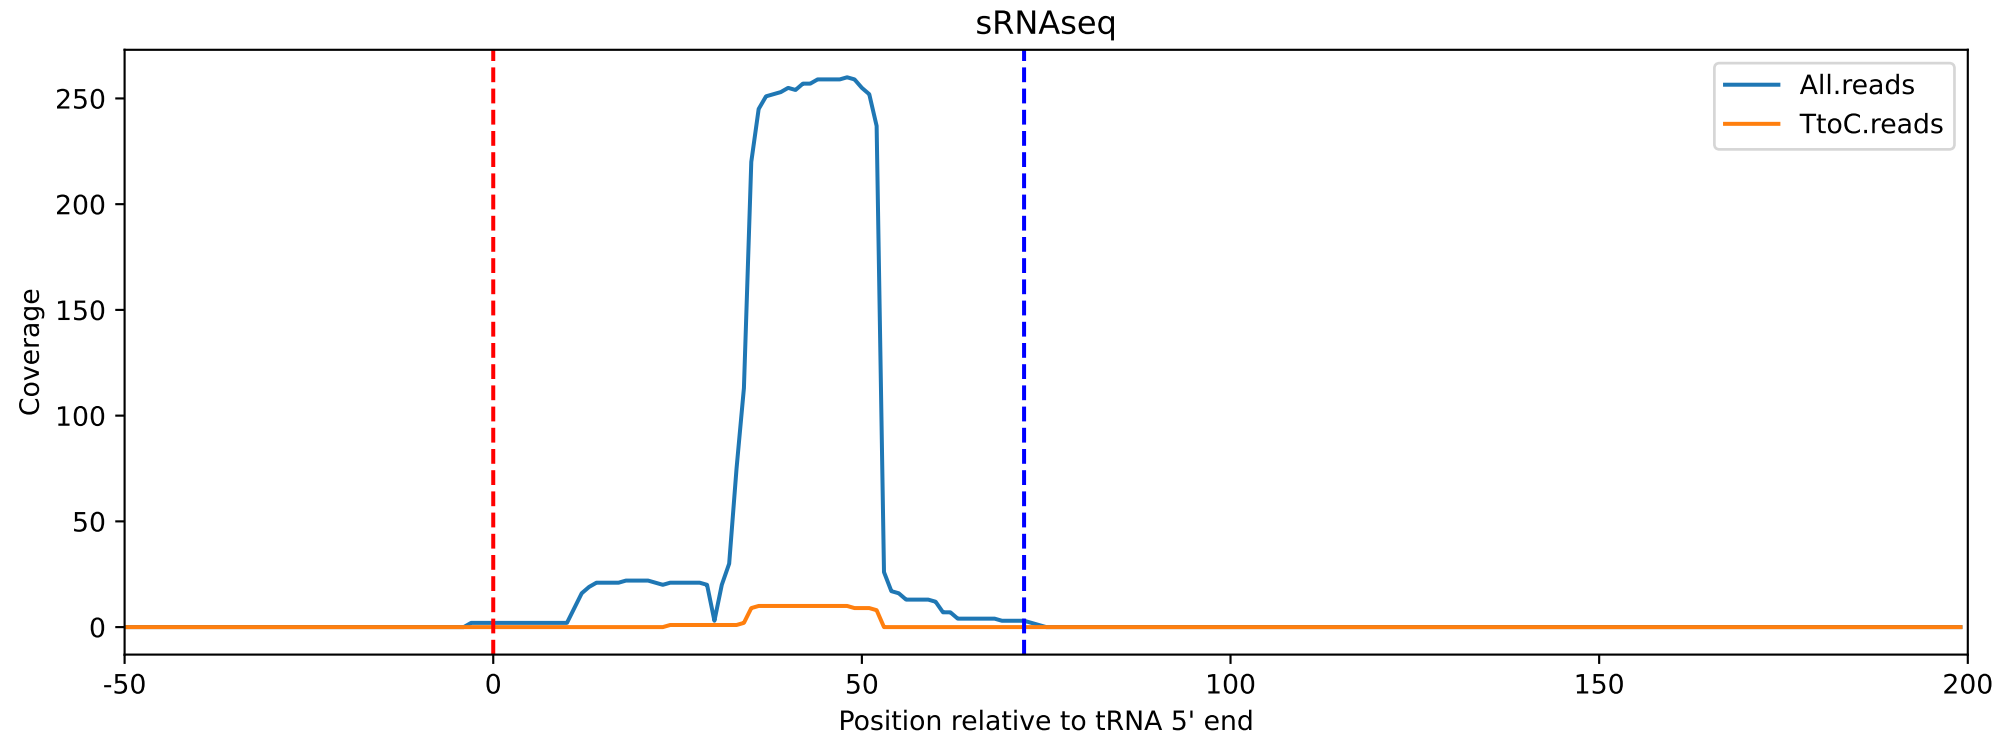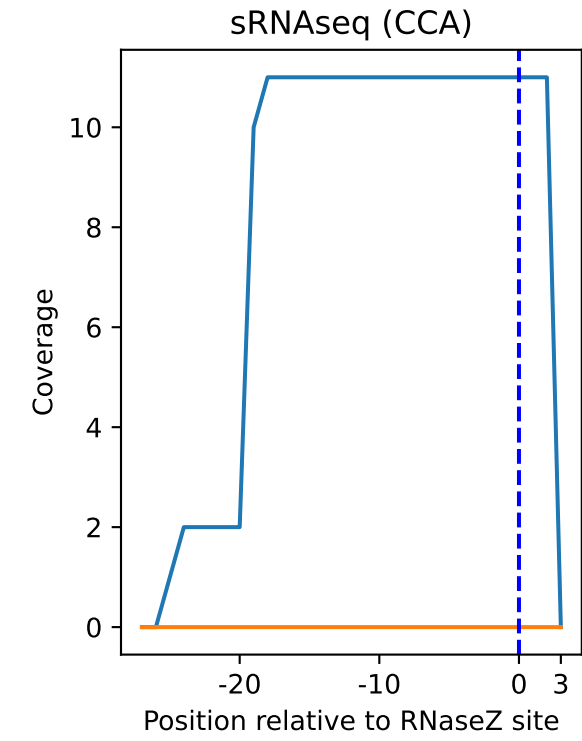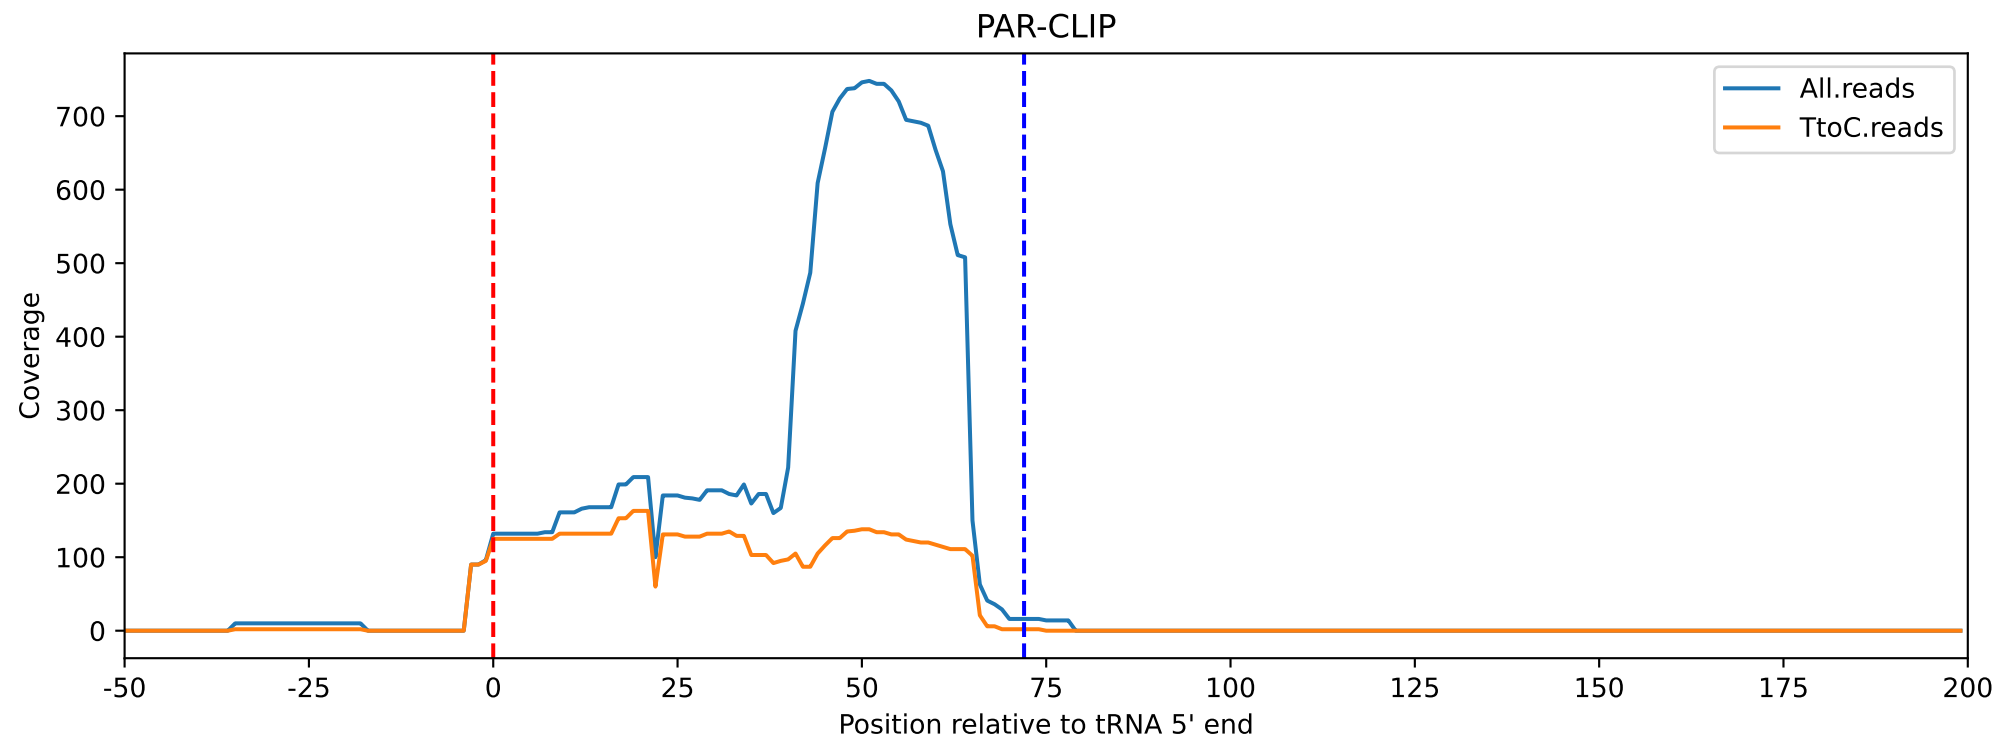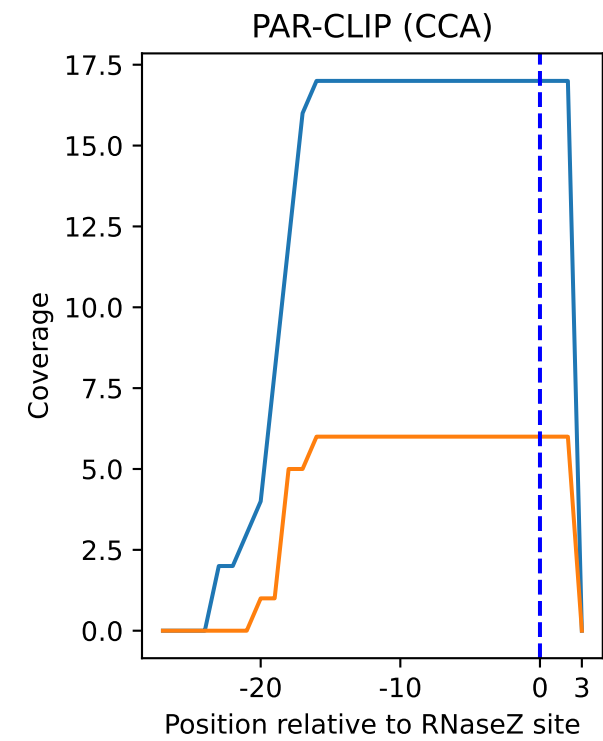

# tRNA-Asp-GTC-1-1

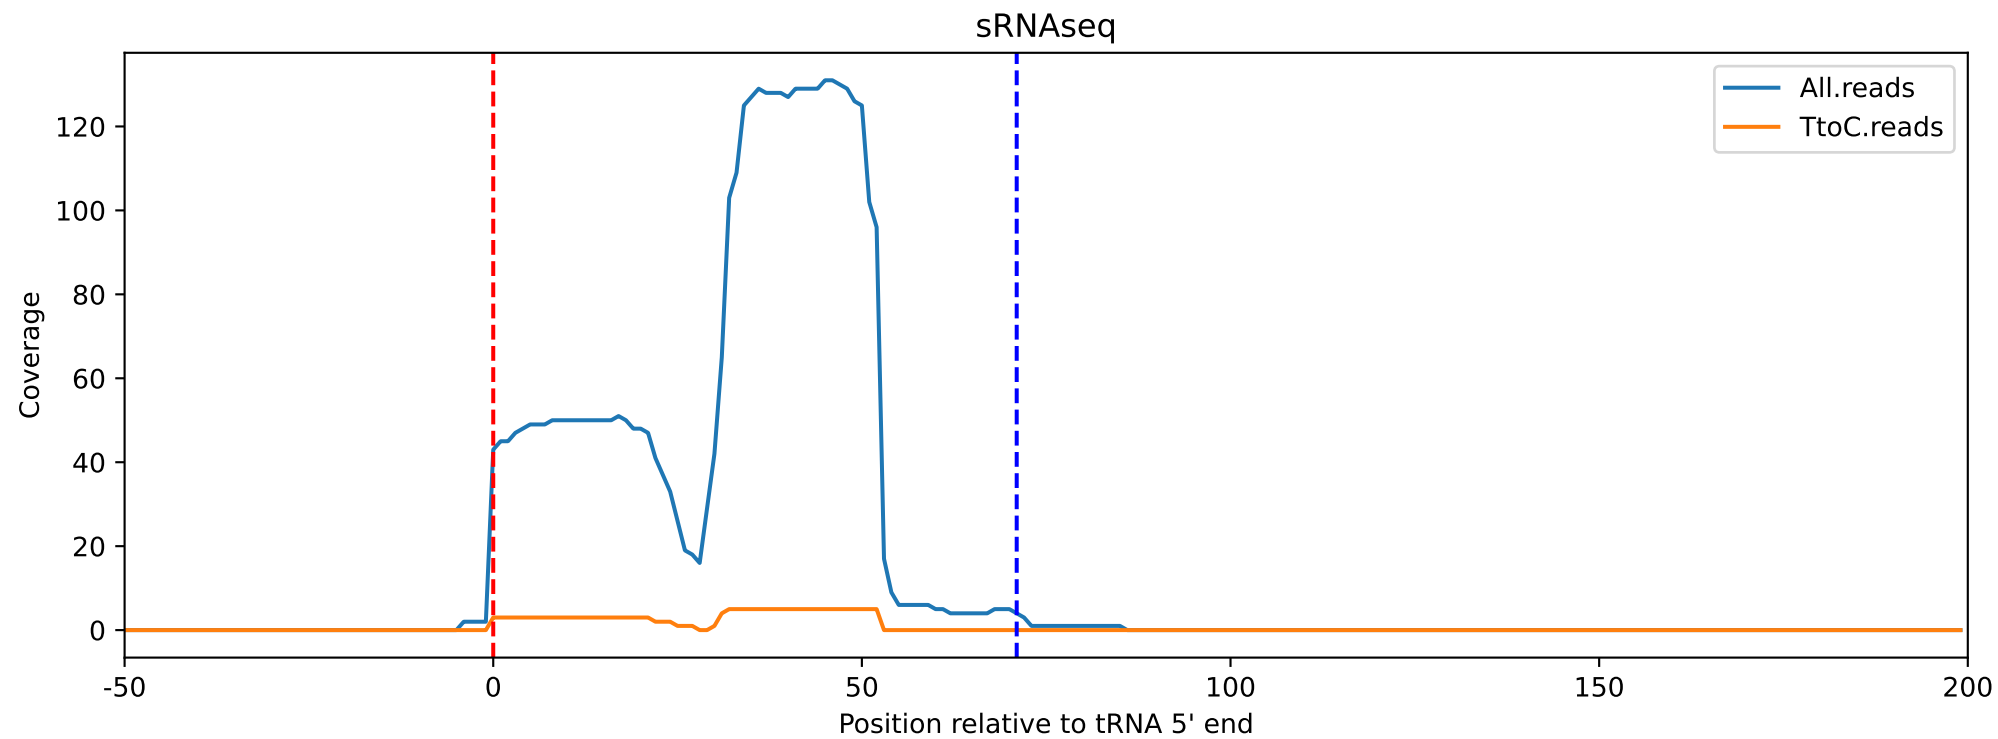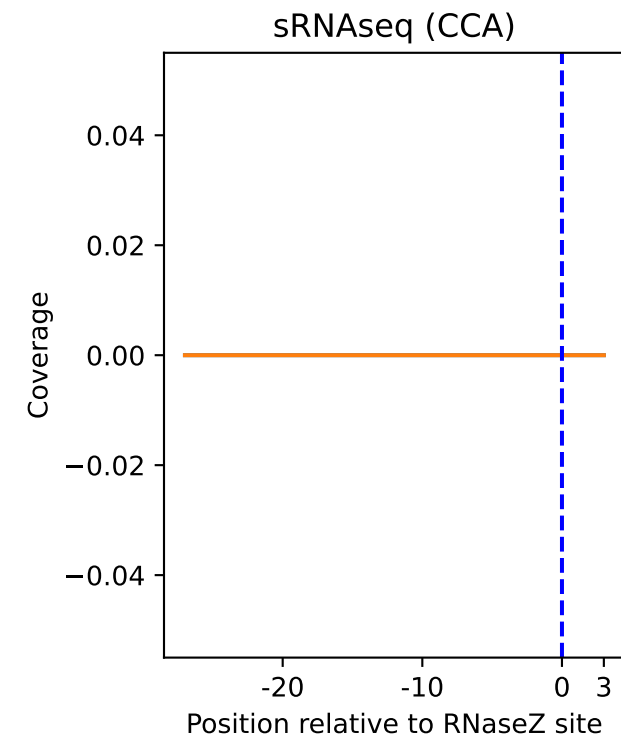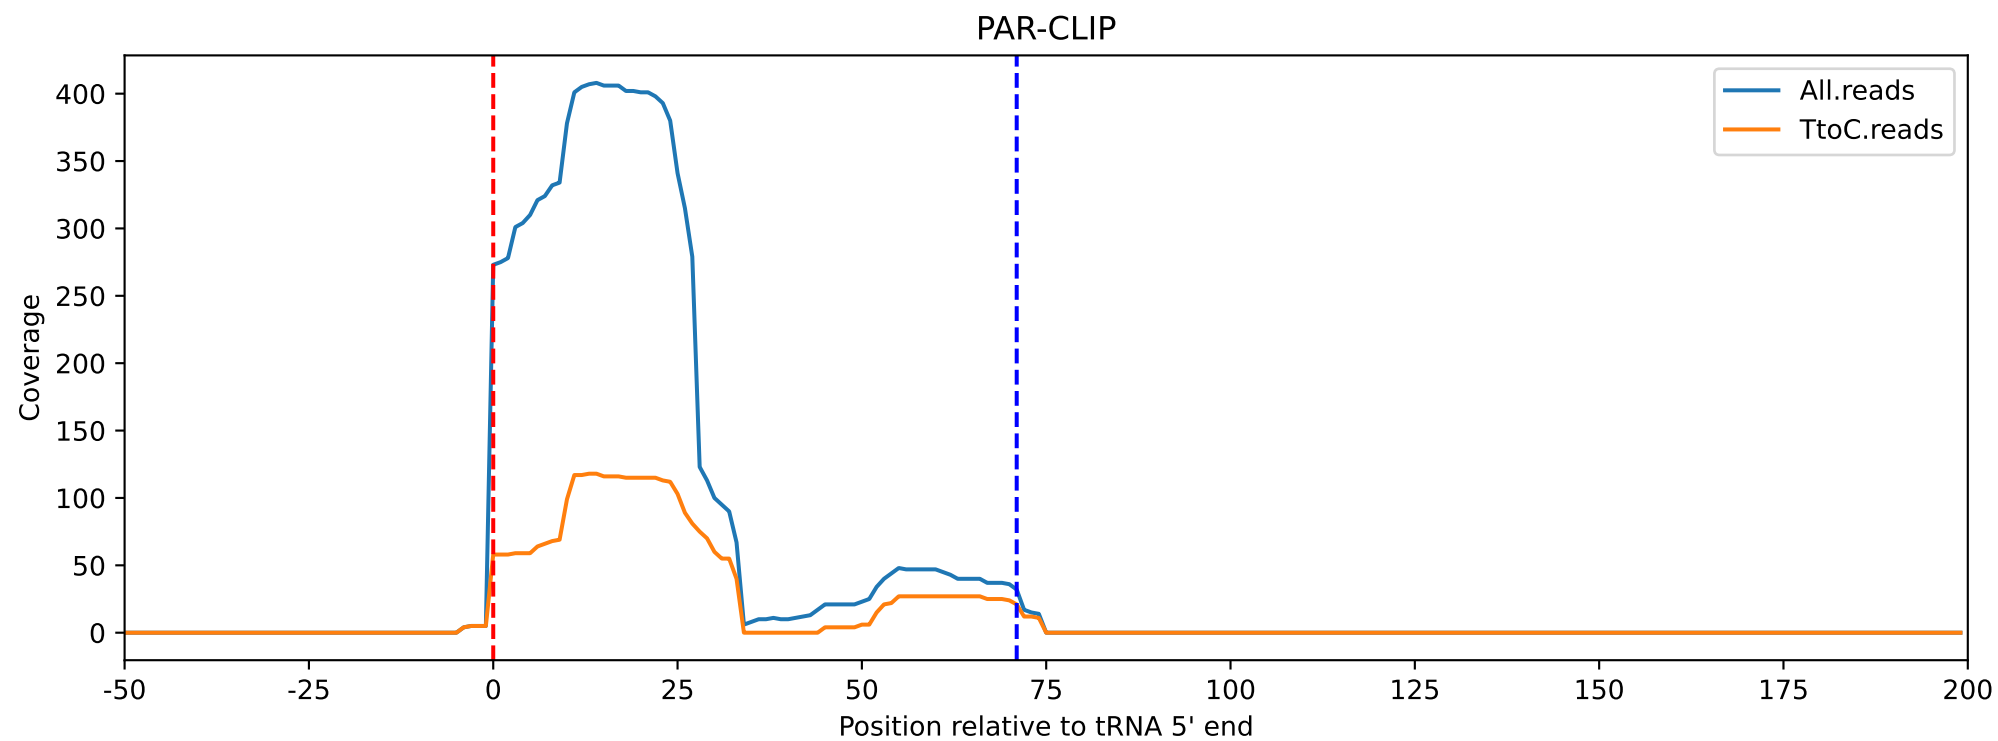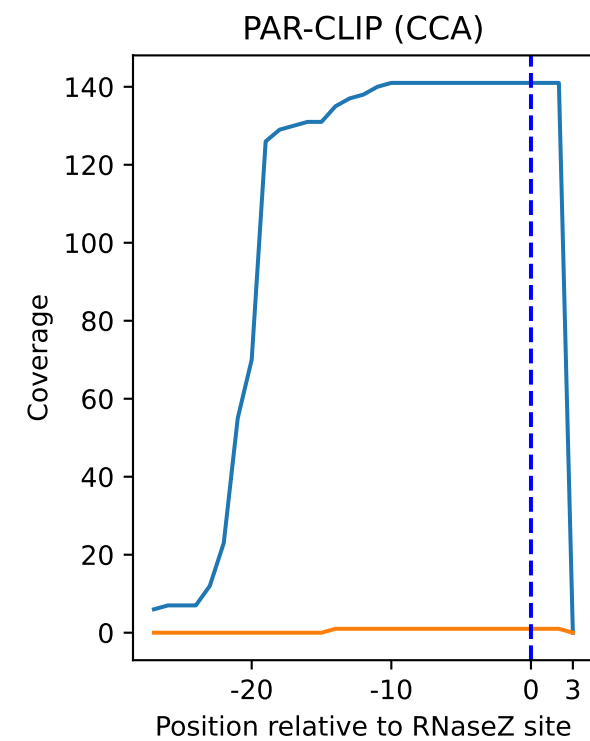

# tRNA-Lys-TTT-2-5

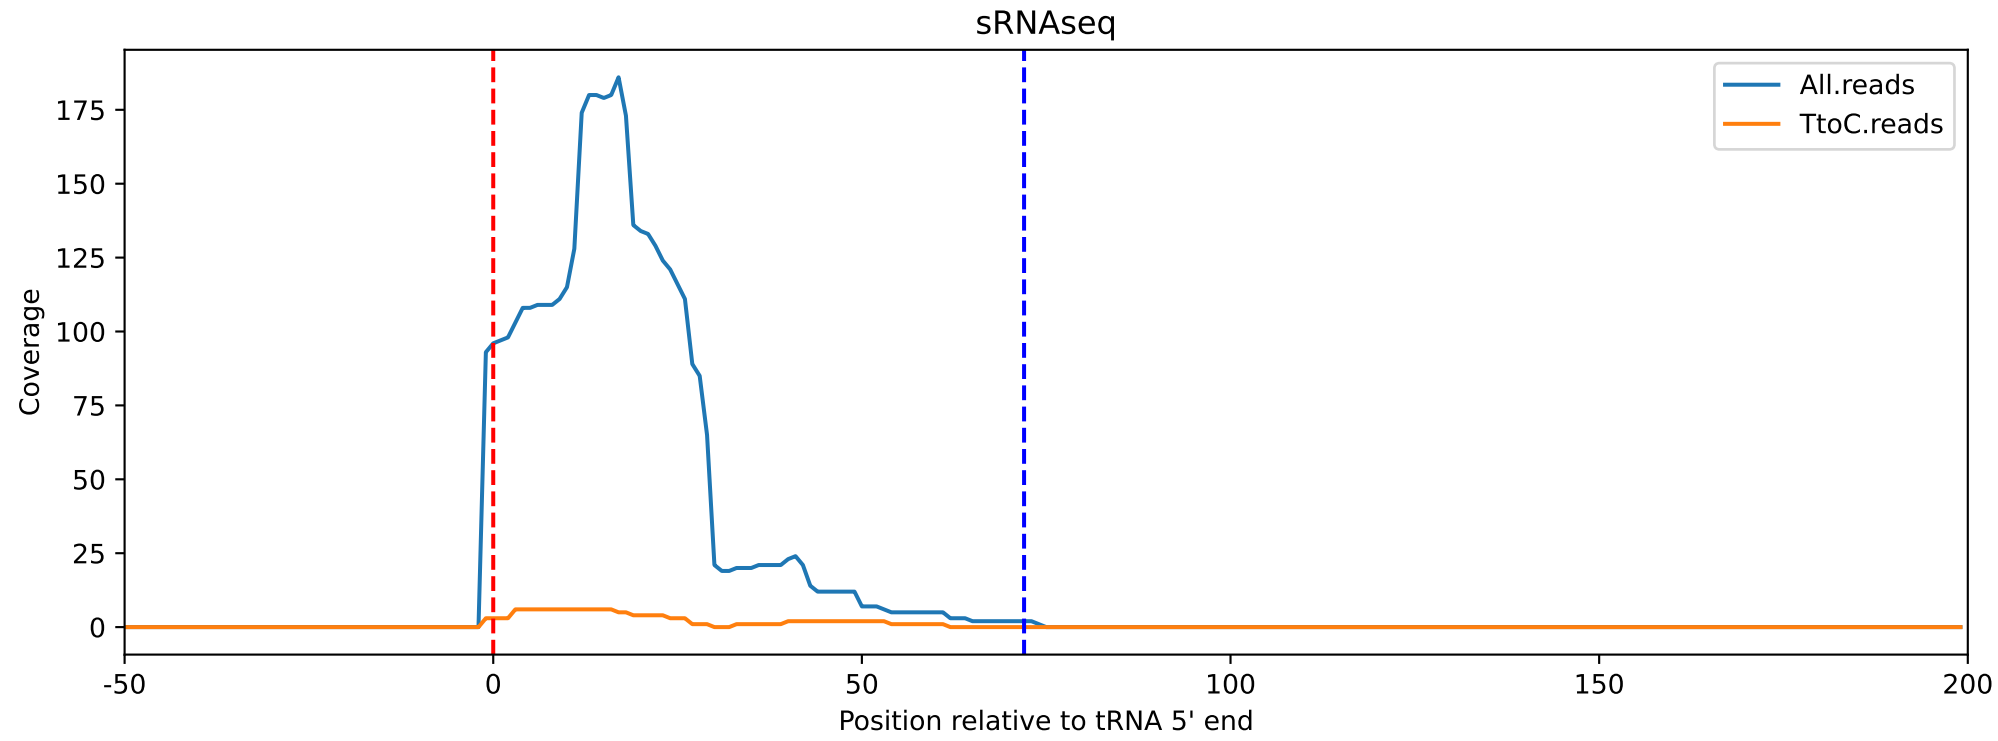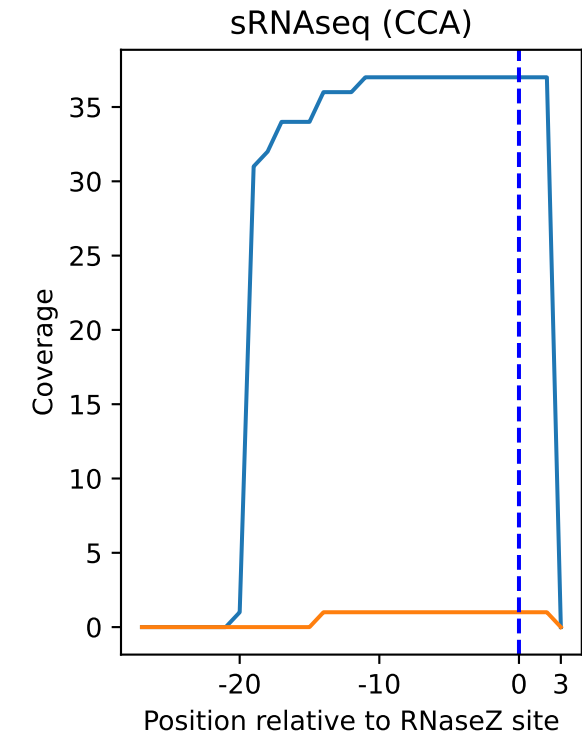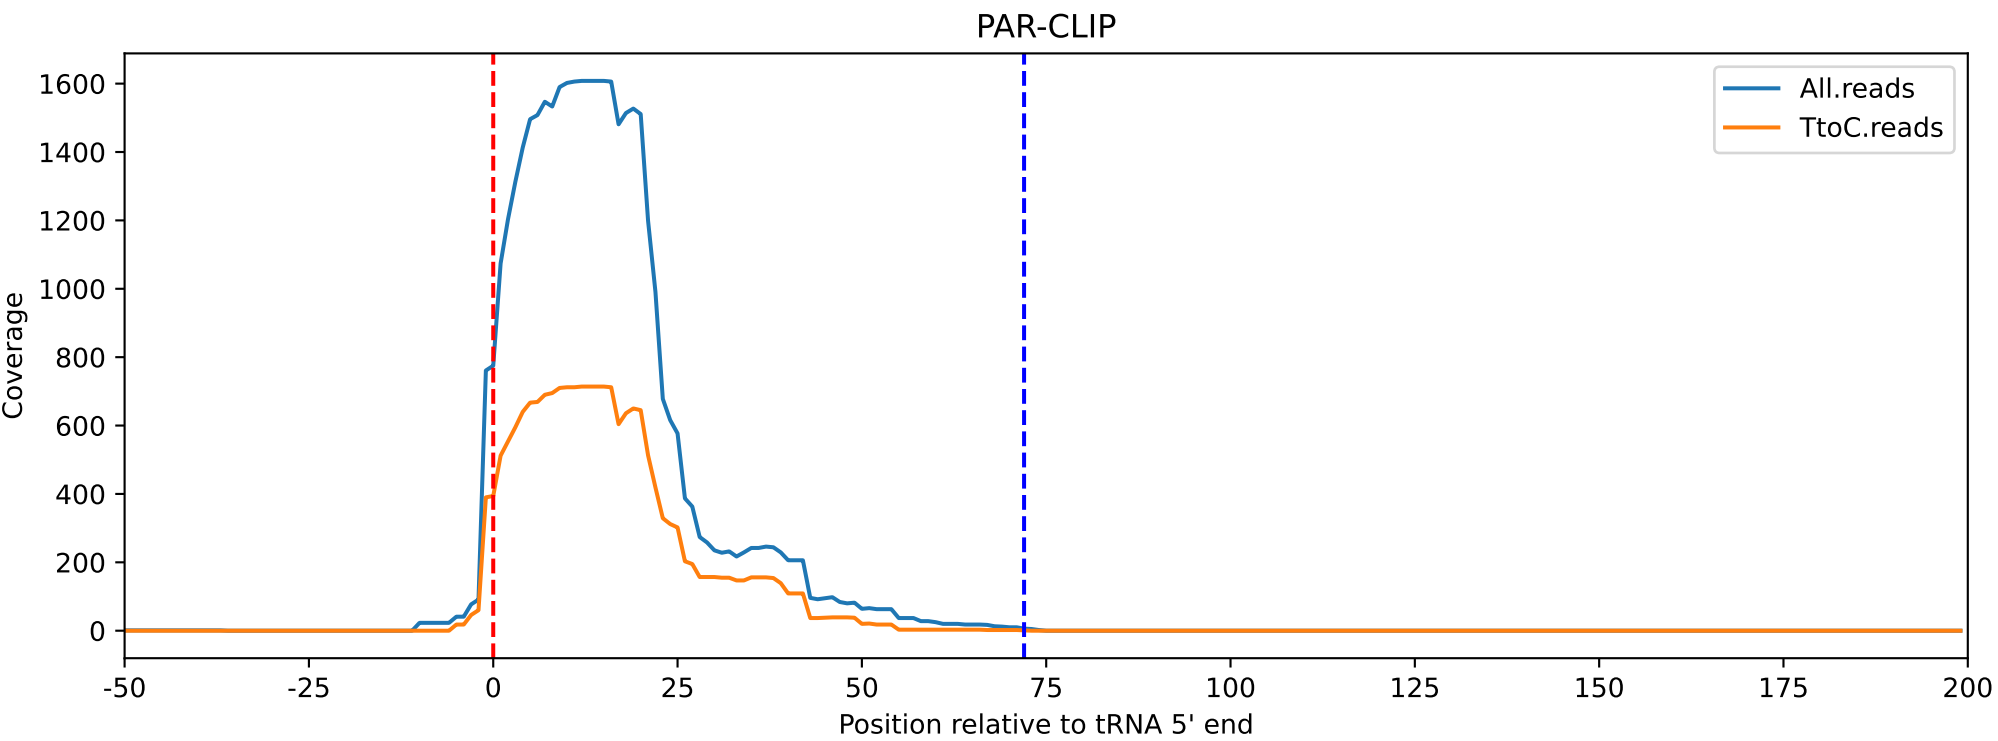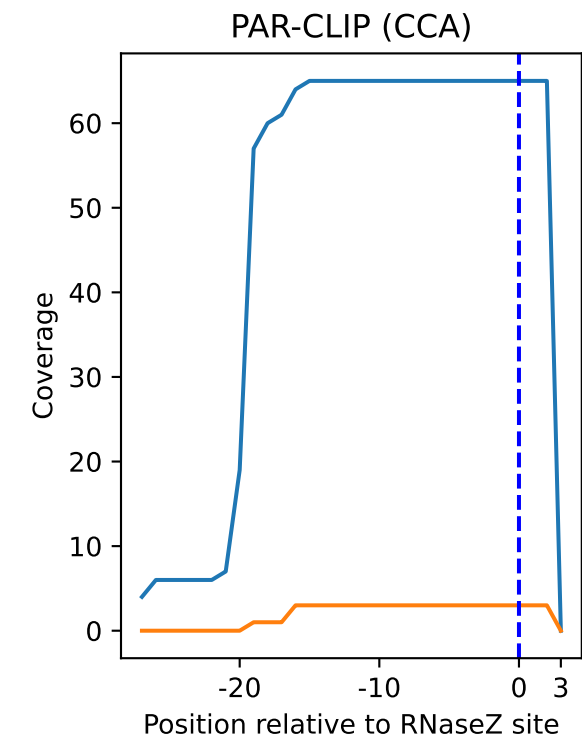

# tRNA-Gly-GCC-1-7

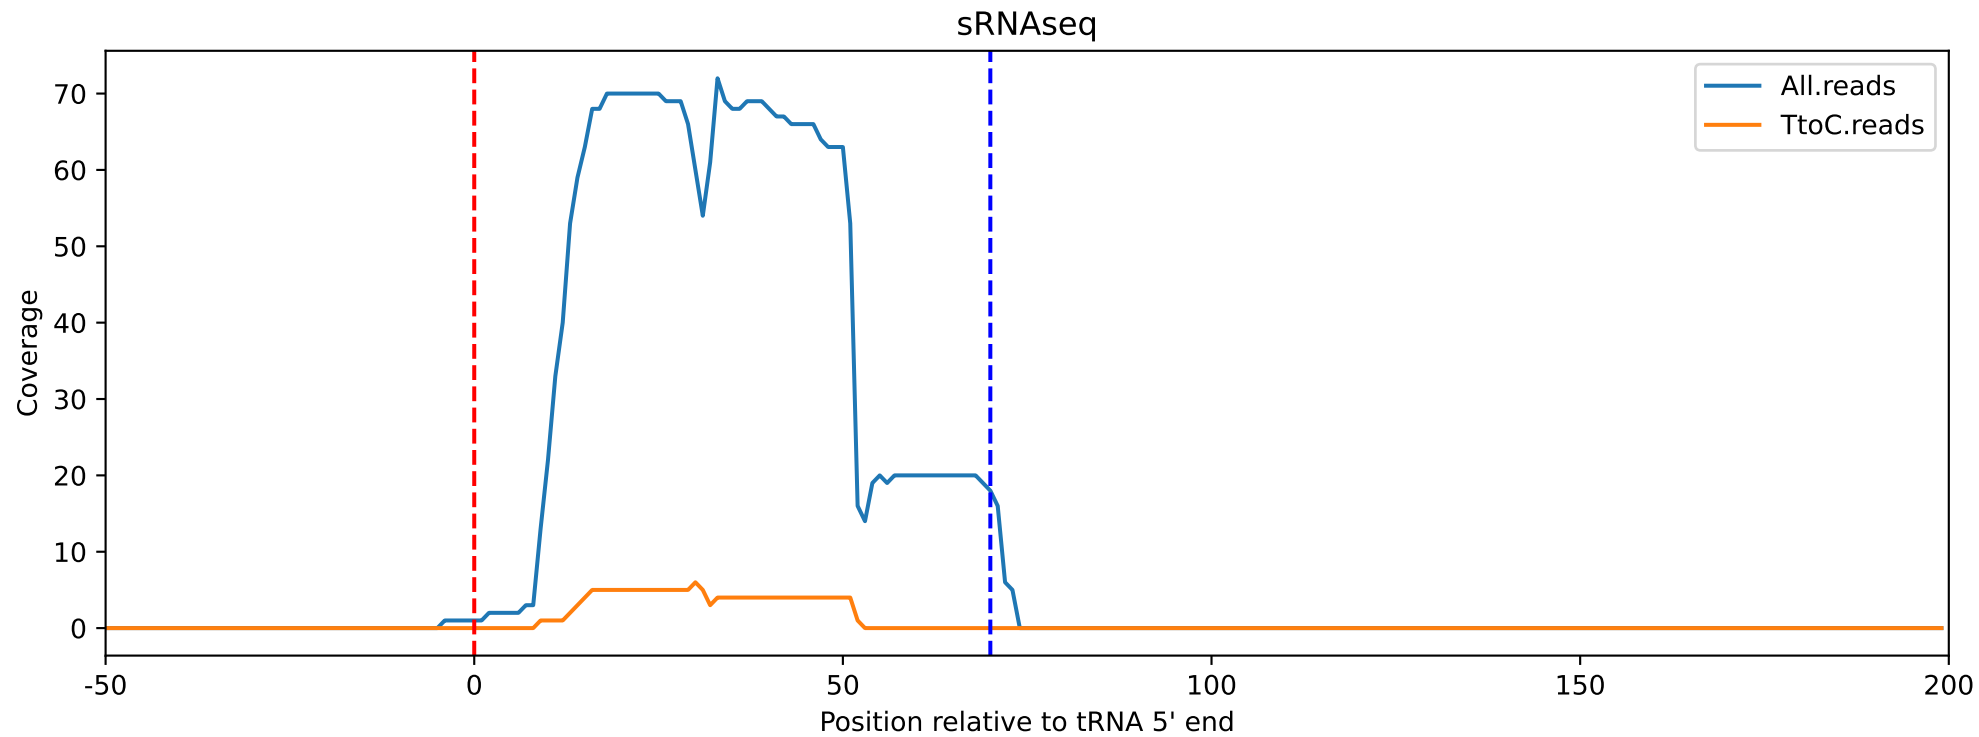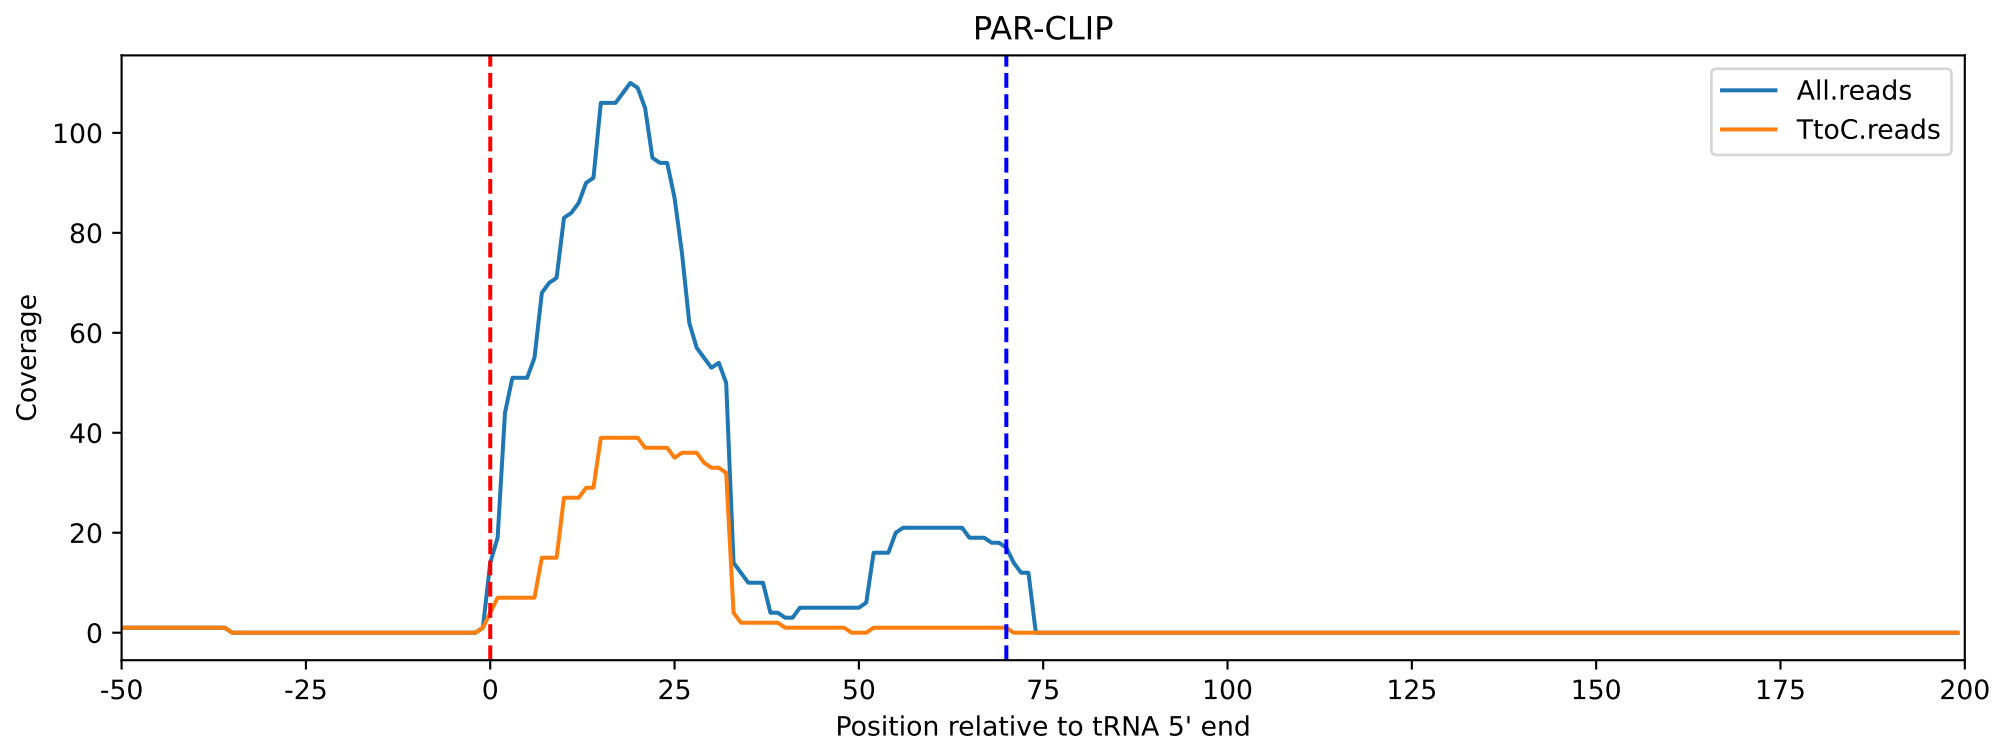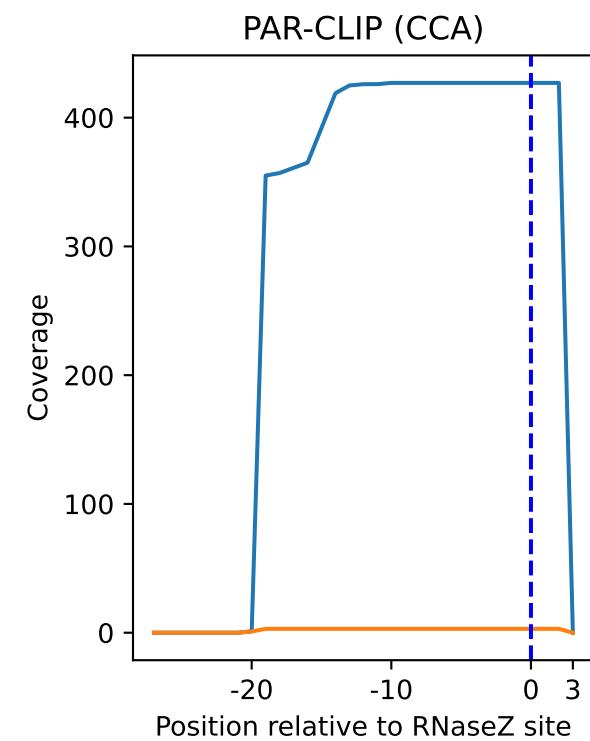



# tRNA-Leu-AAG-1-4

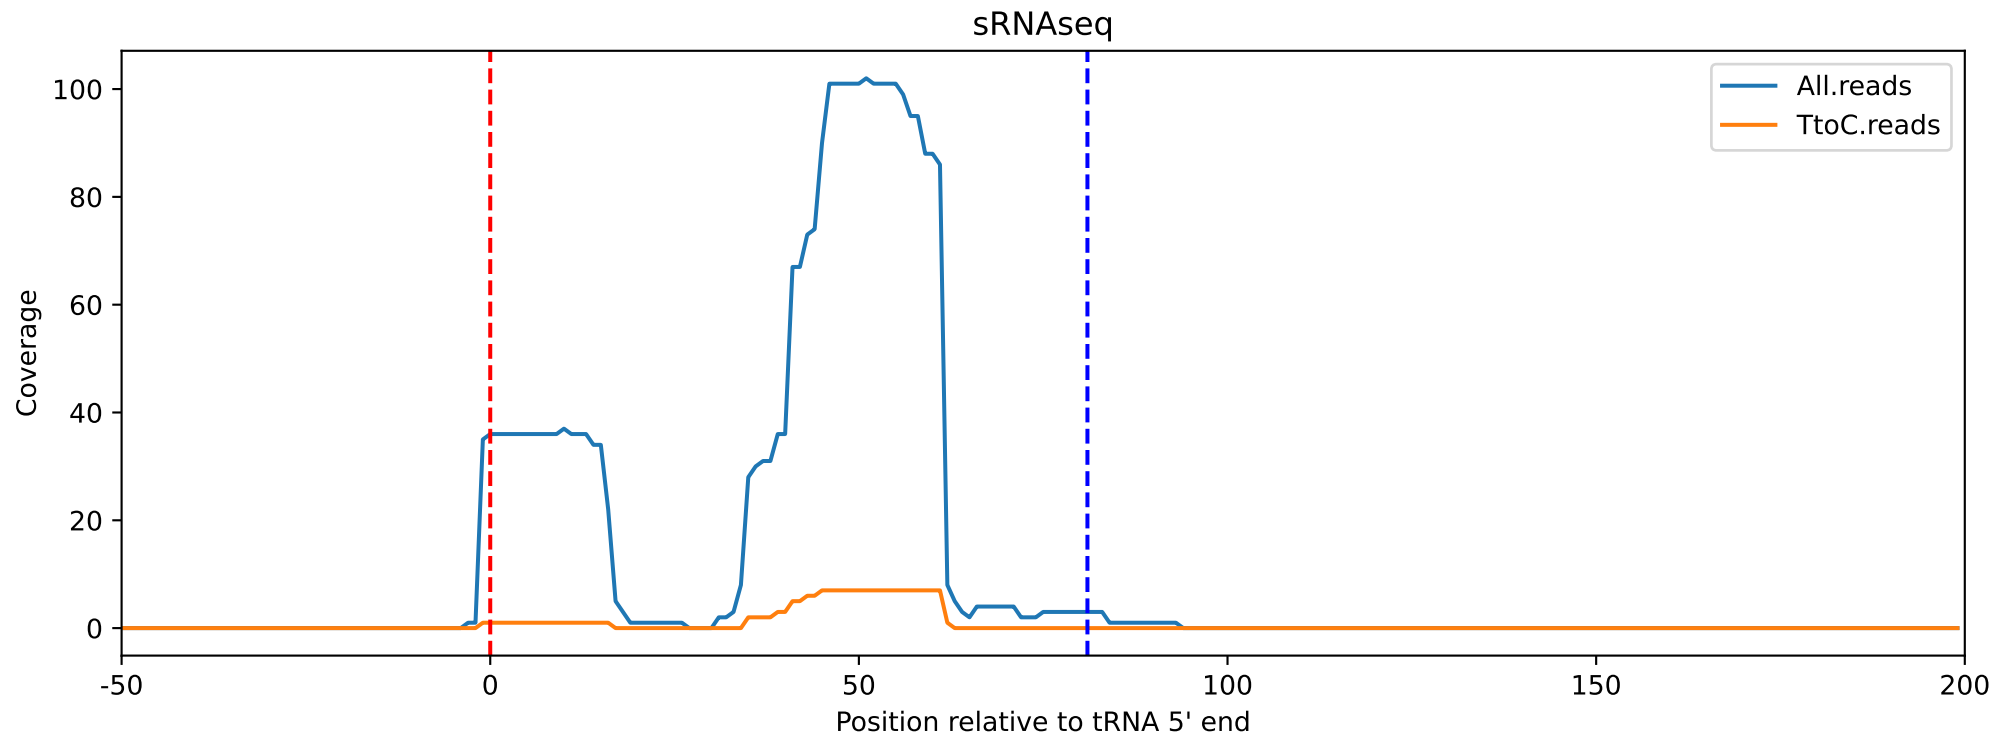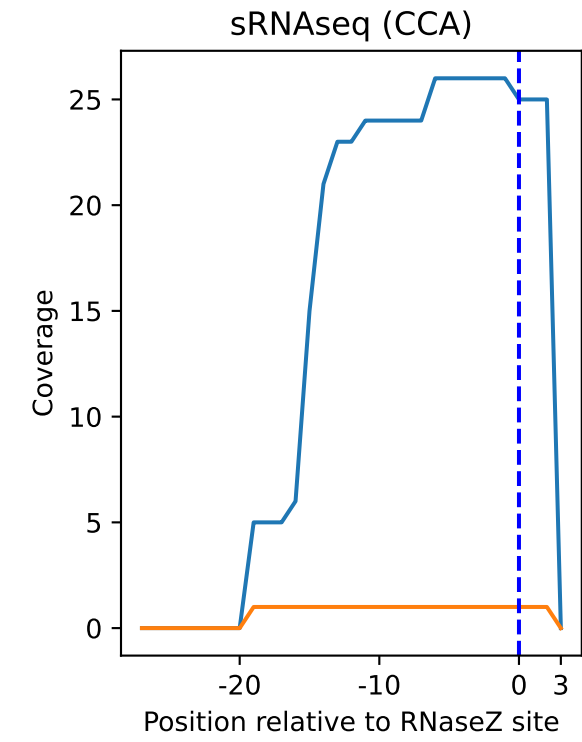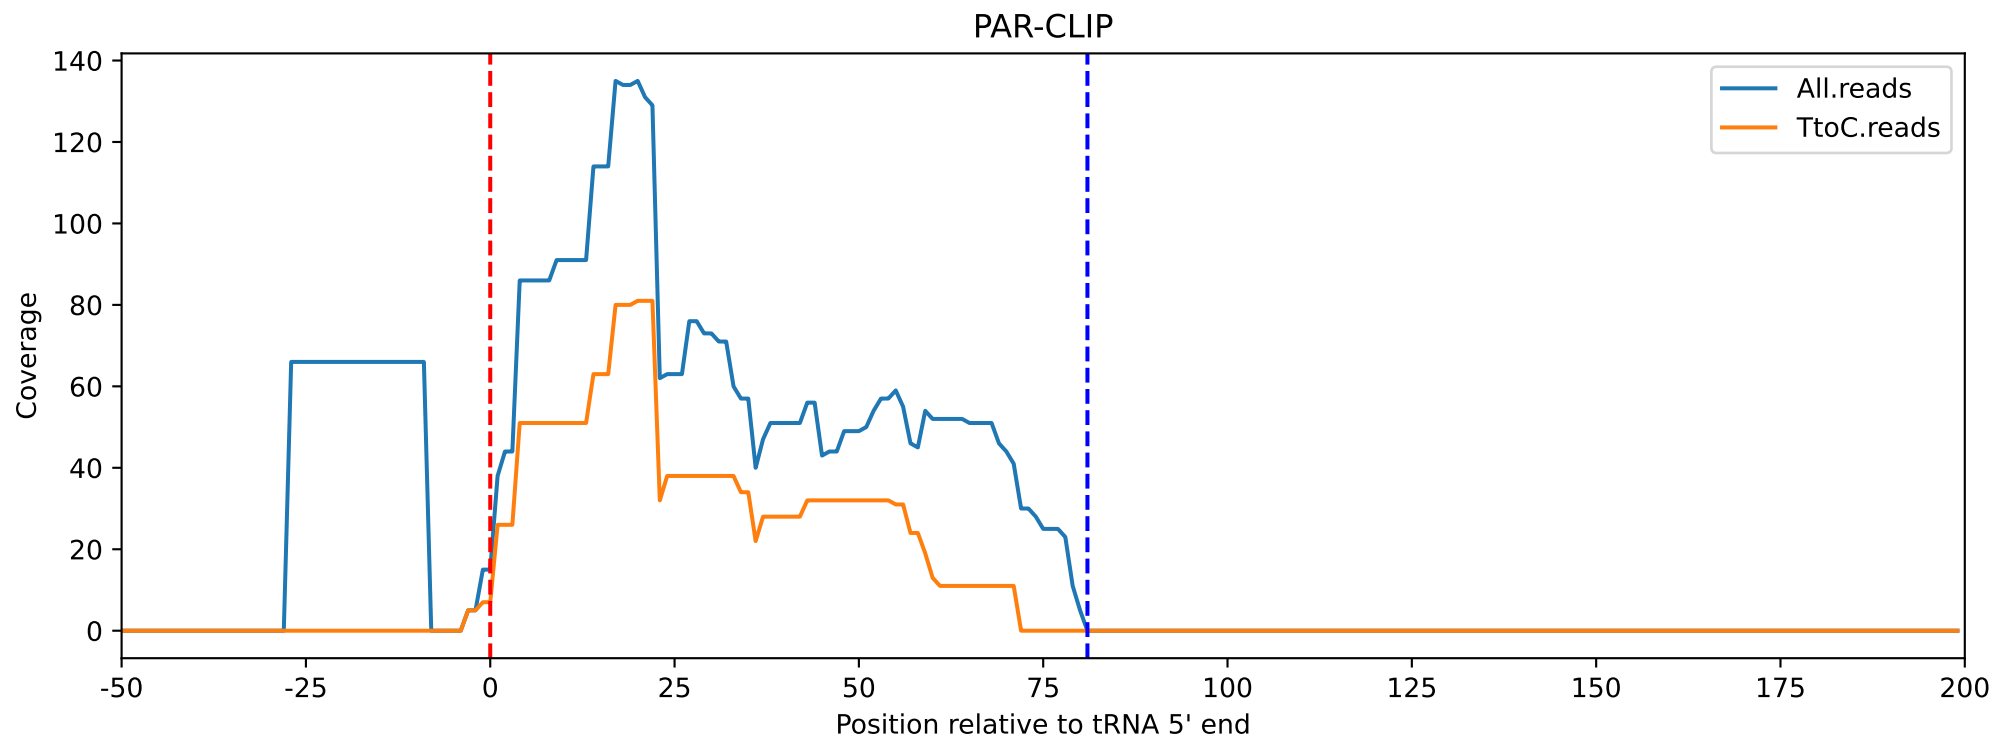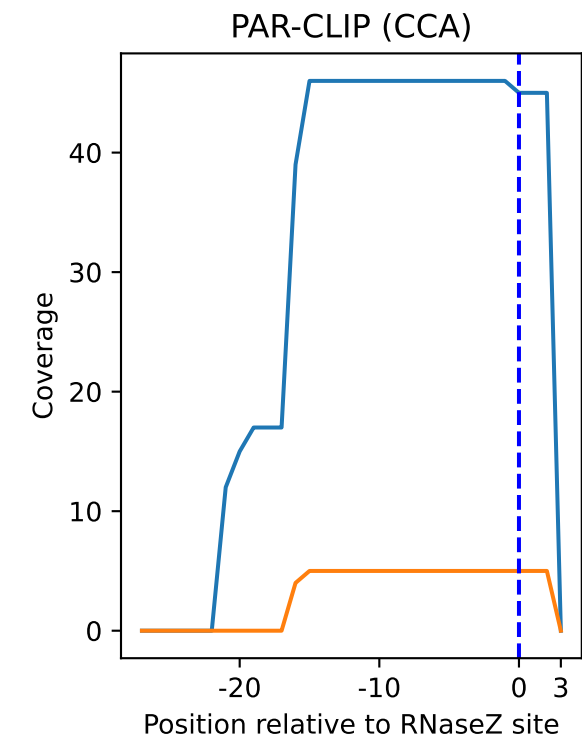

# tRNA-Lys-CTT-1-11

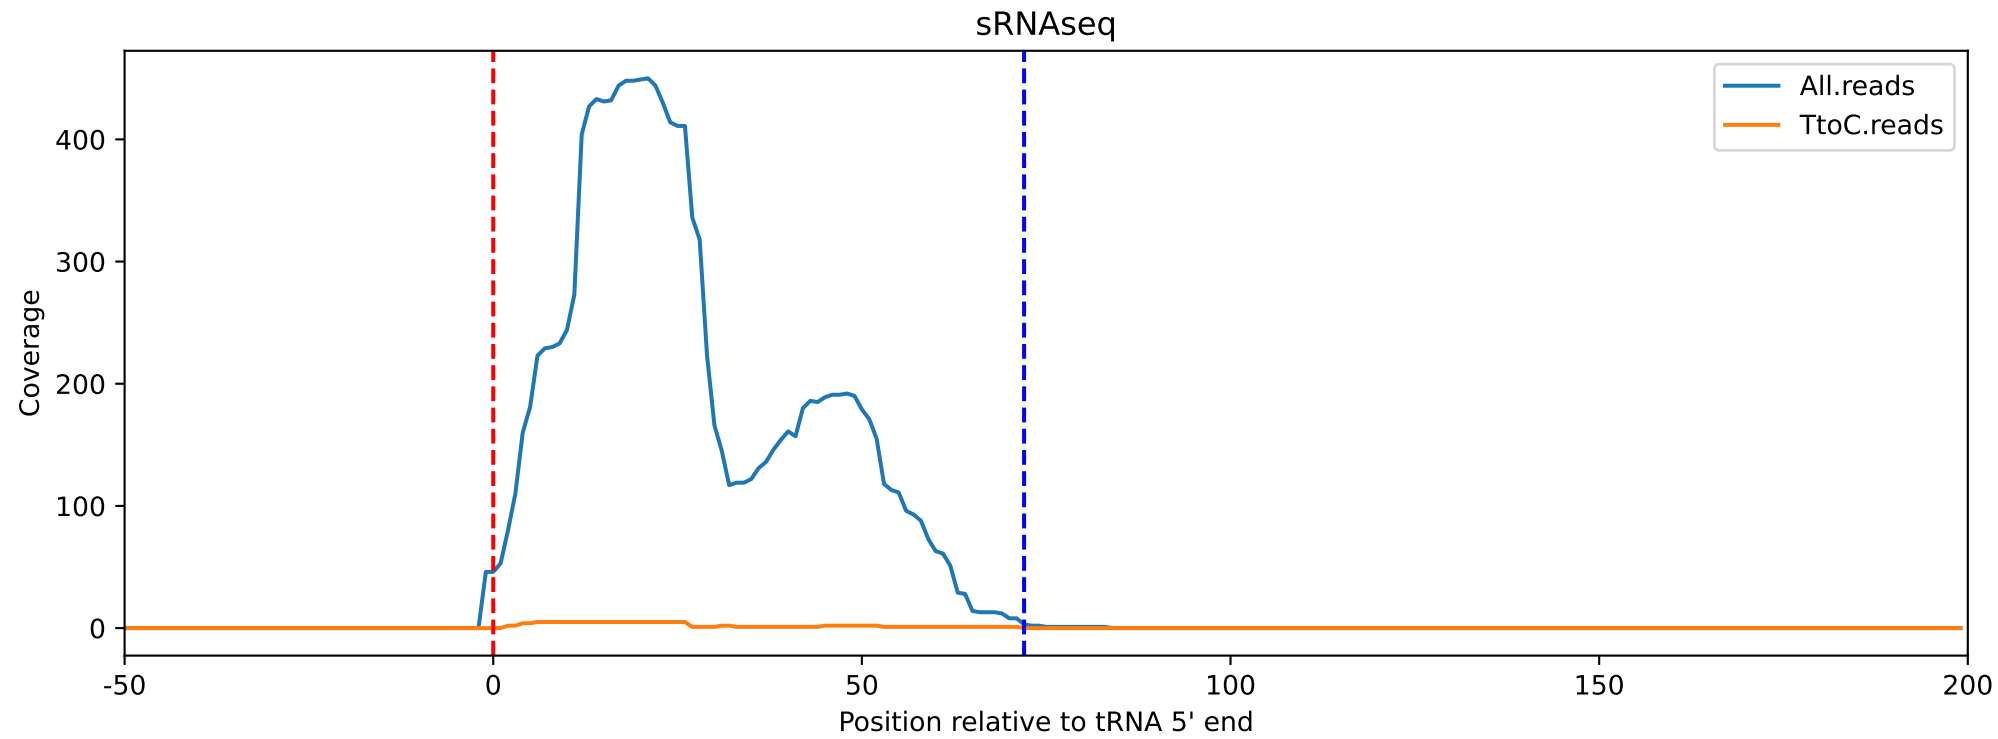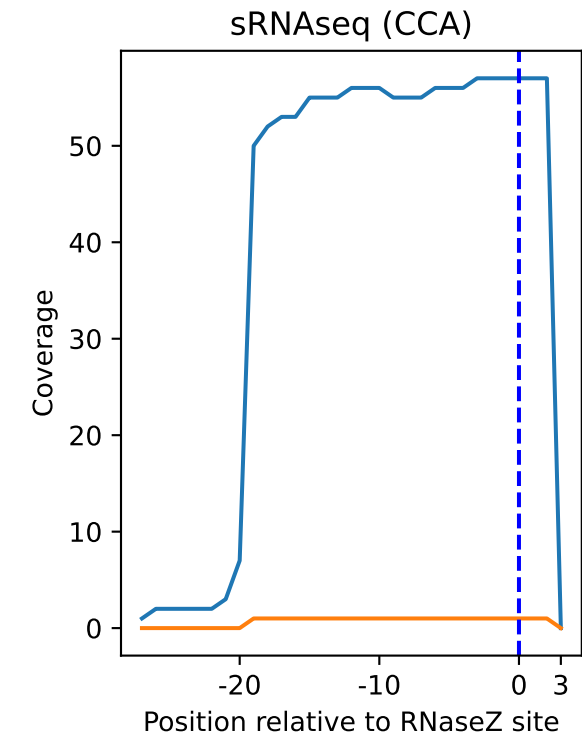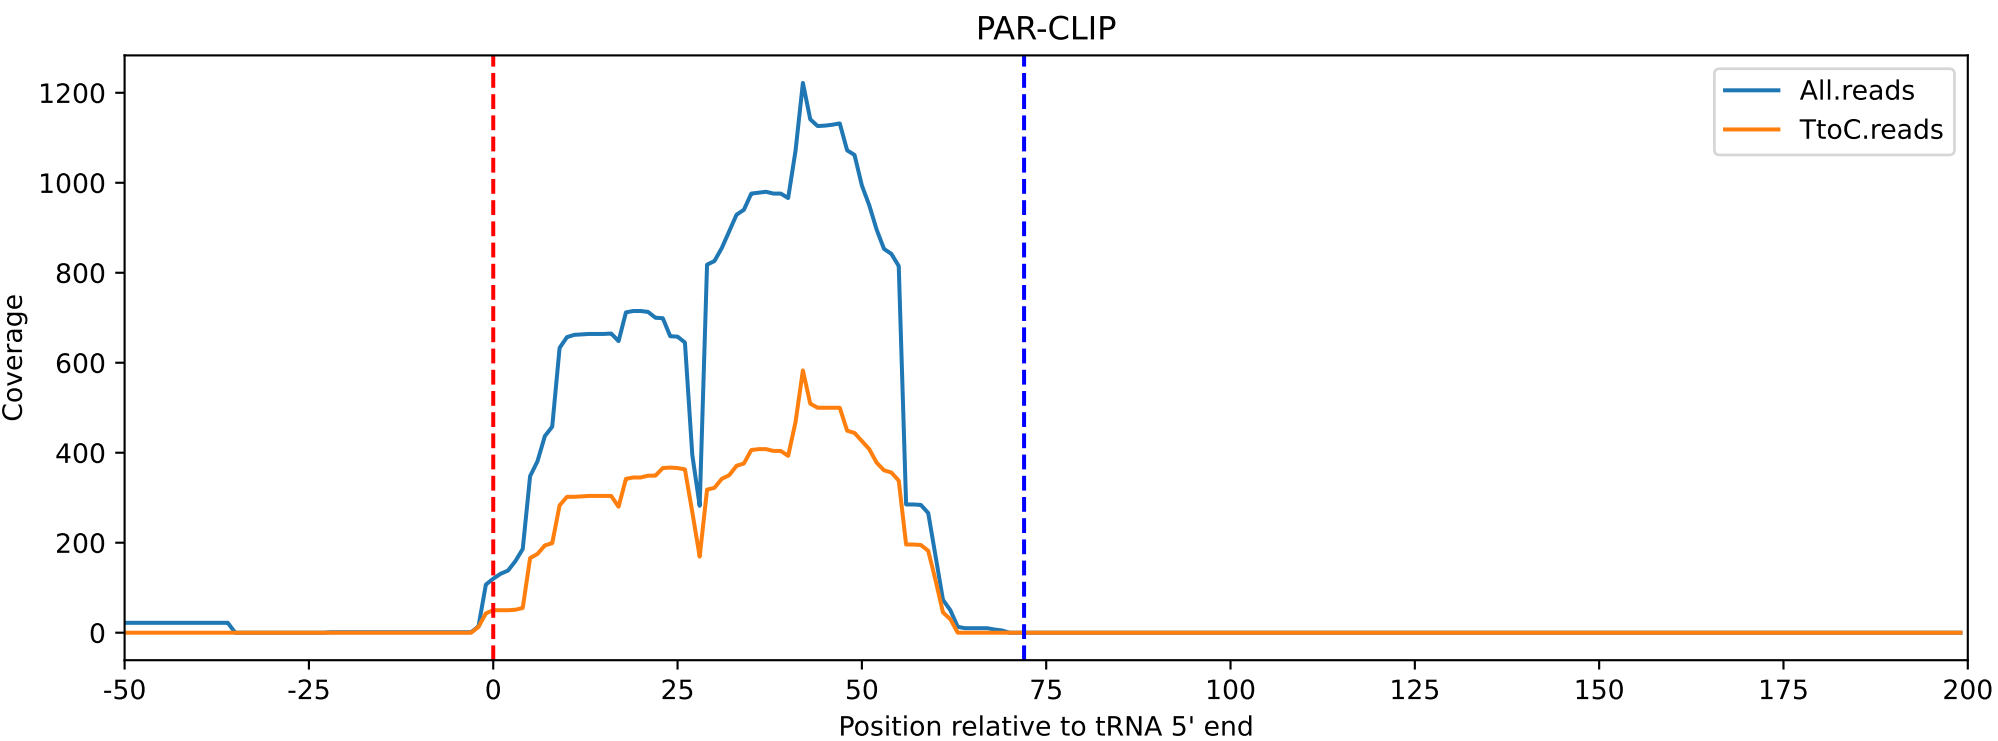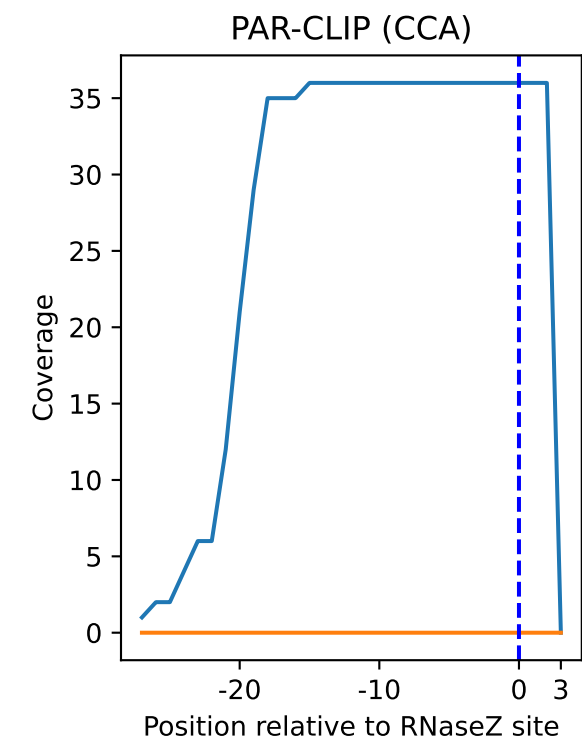

# tRNA-Ser-GCT-1-1

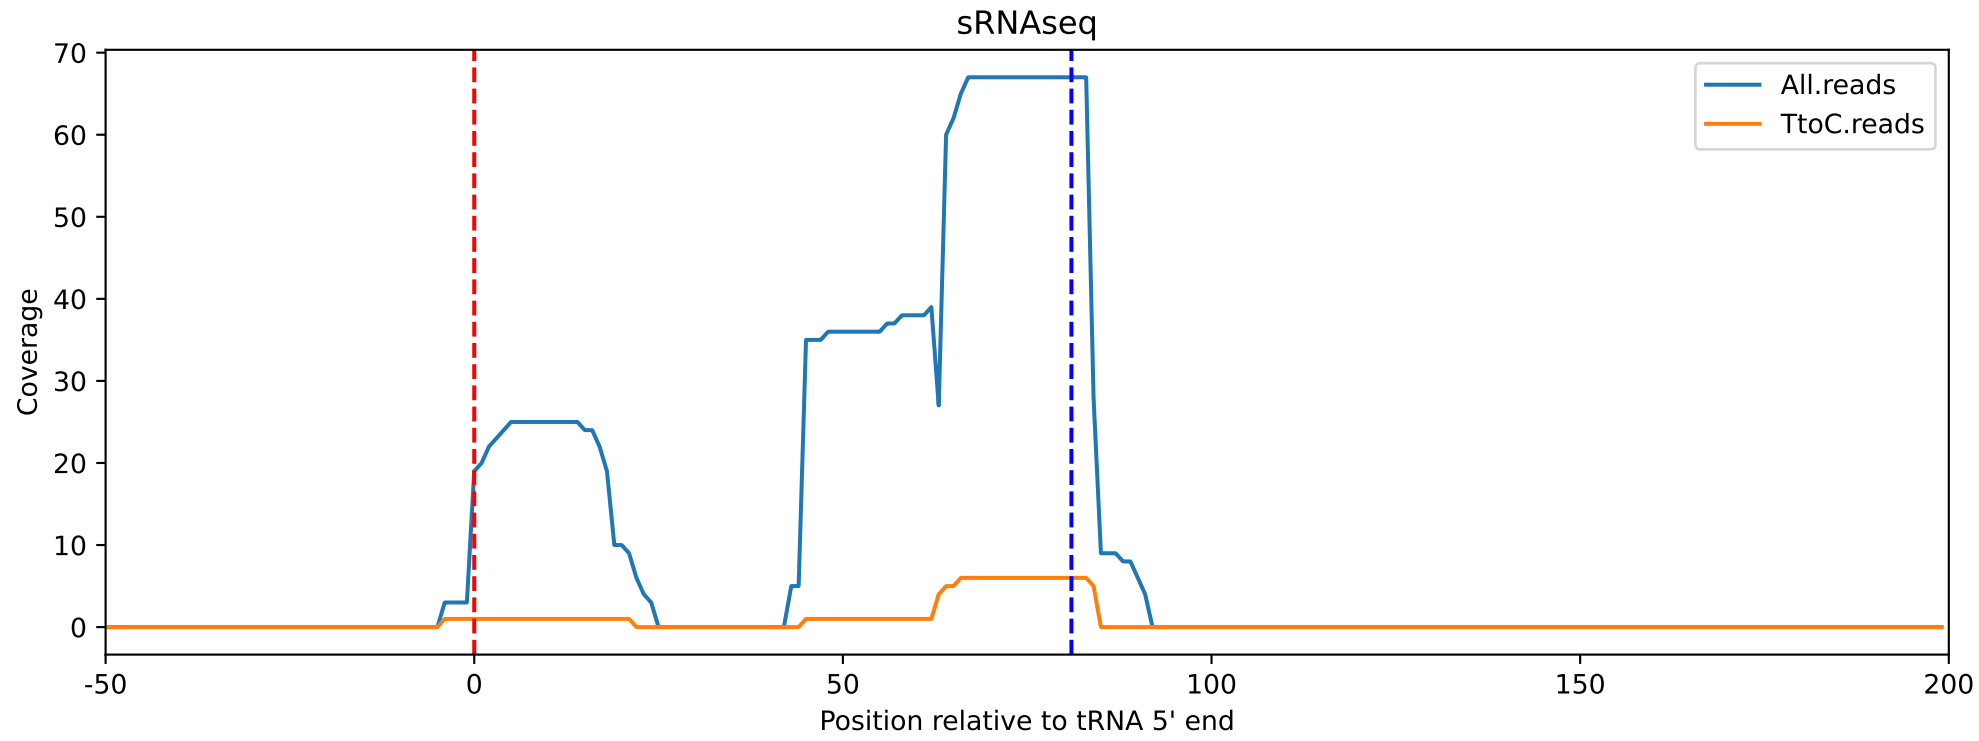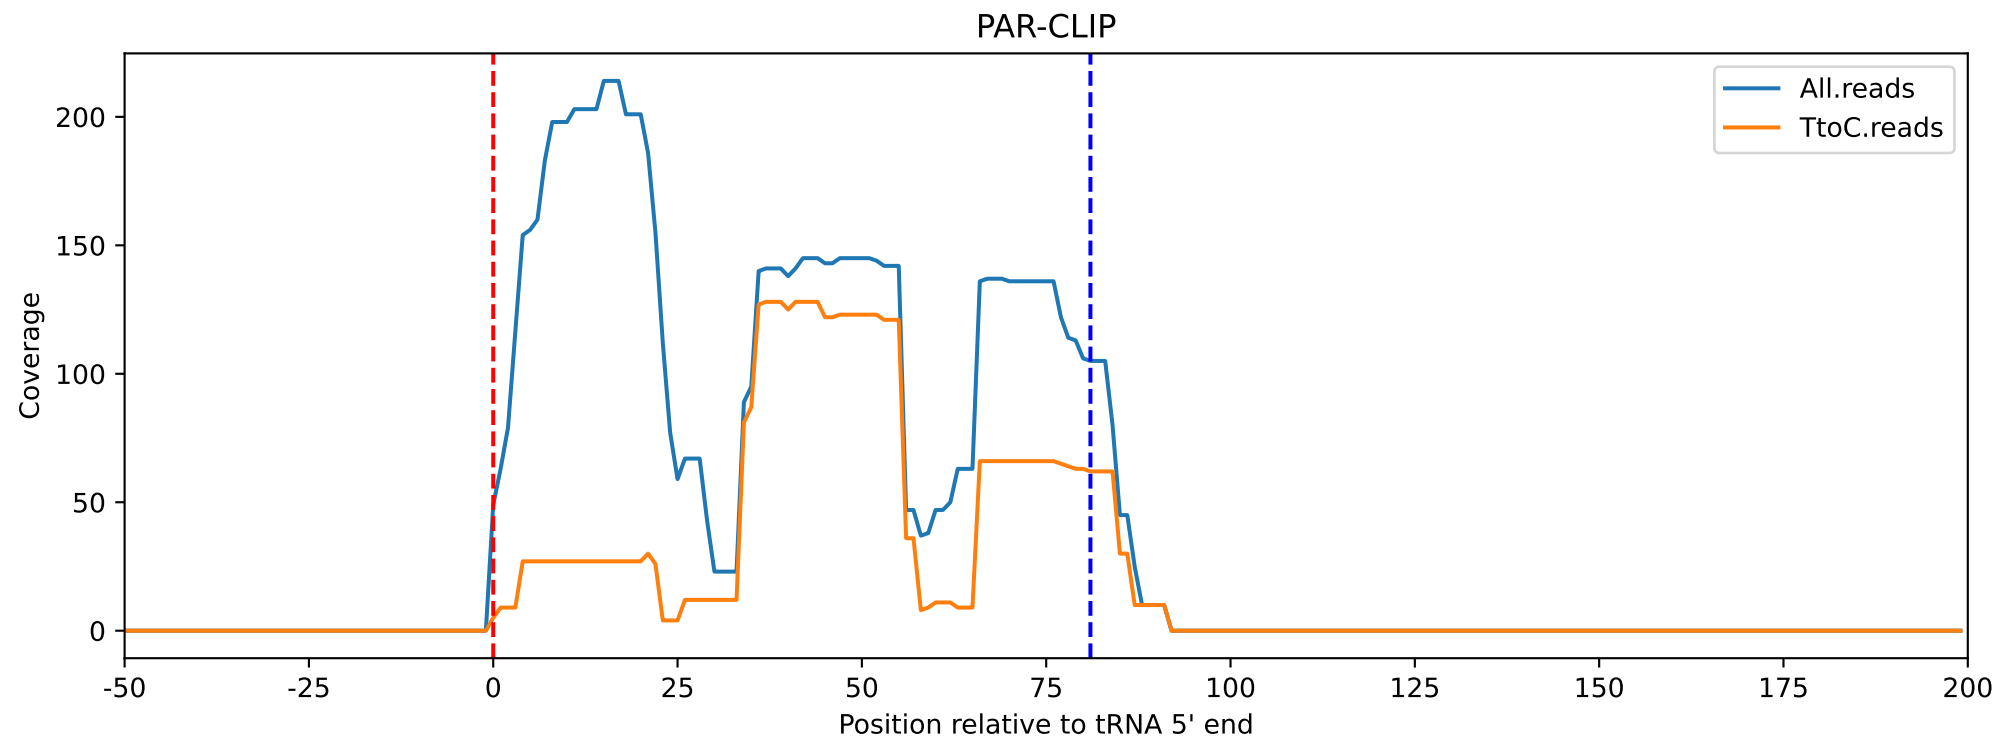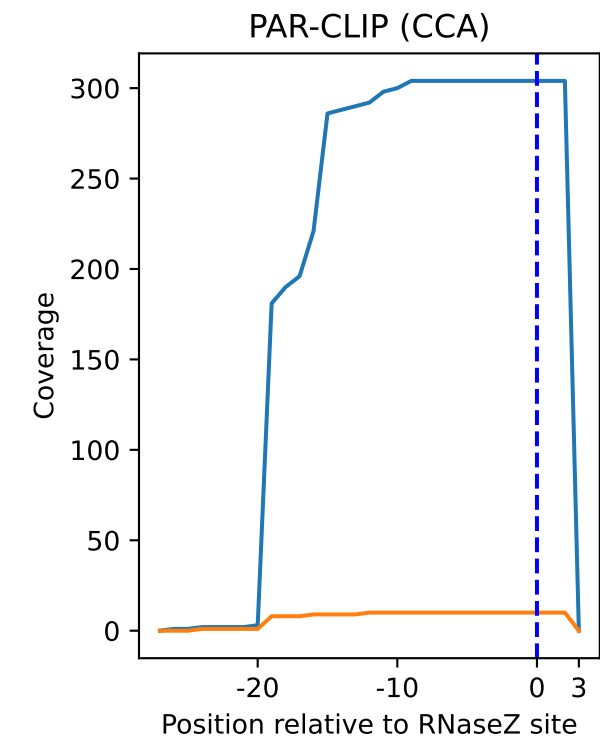

# tRNA-Gly-GCC-1-10

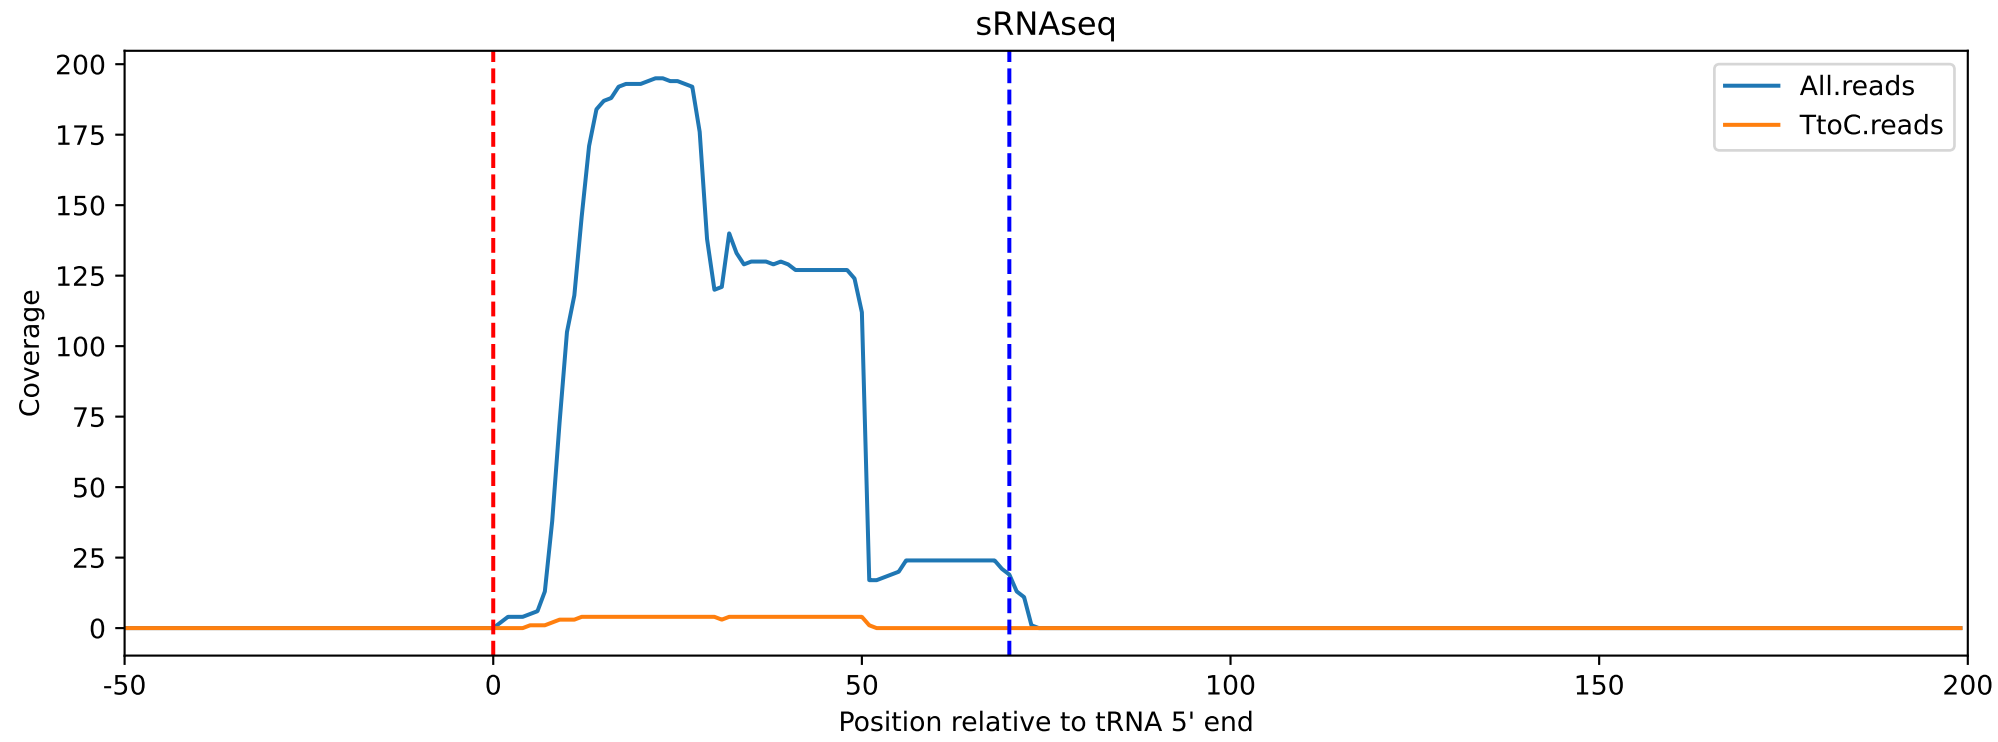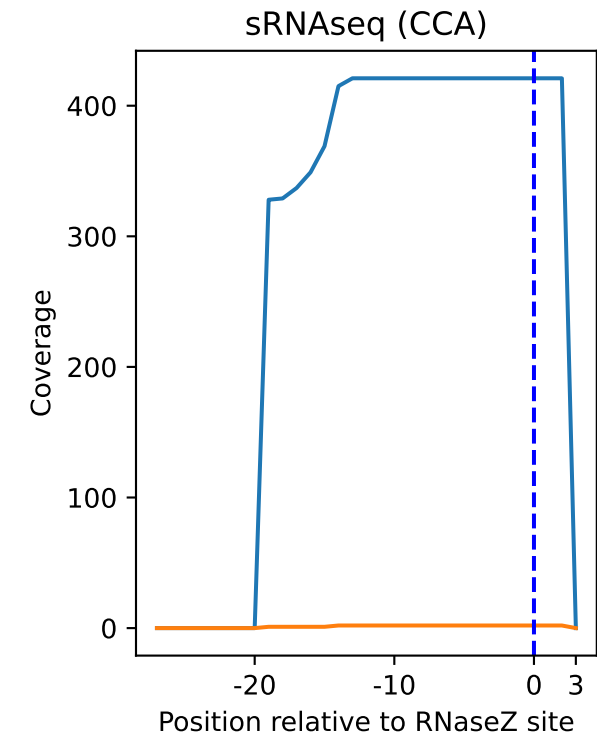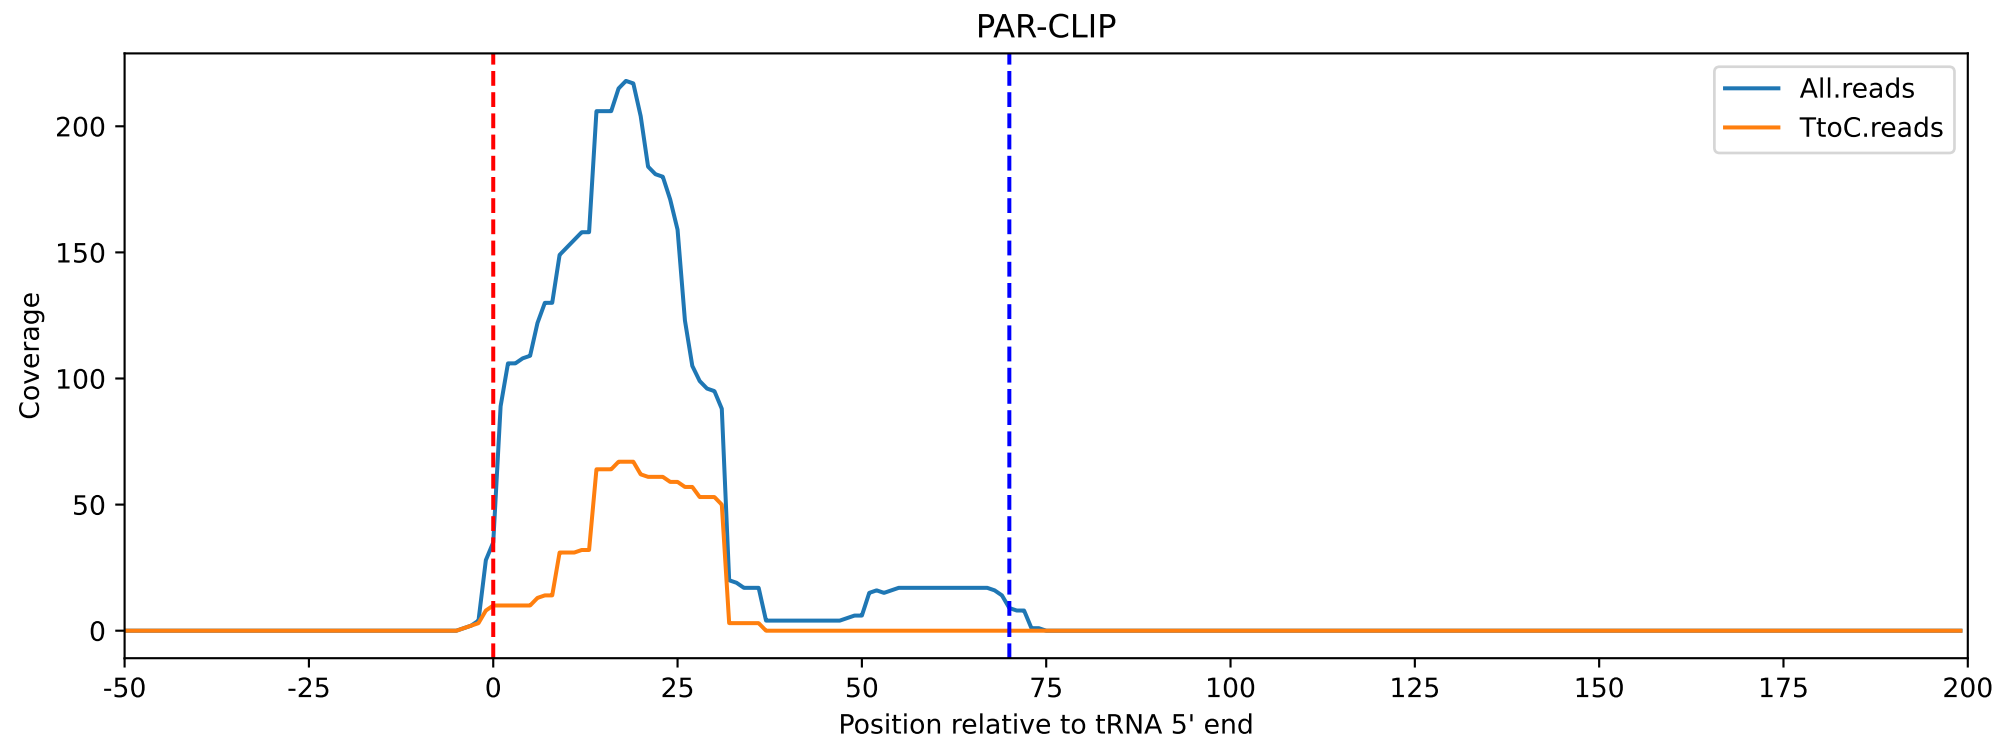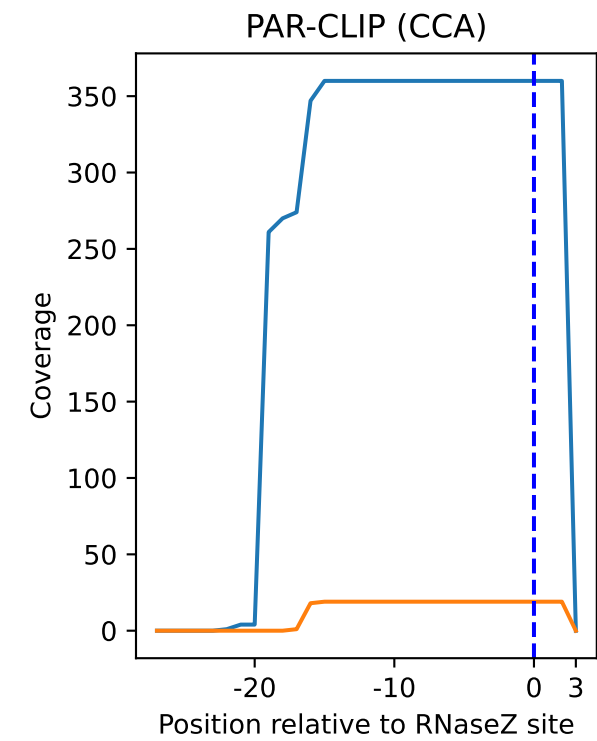

# tRNA-Gly-GCC-1-11

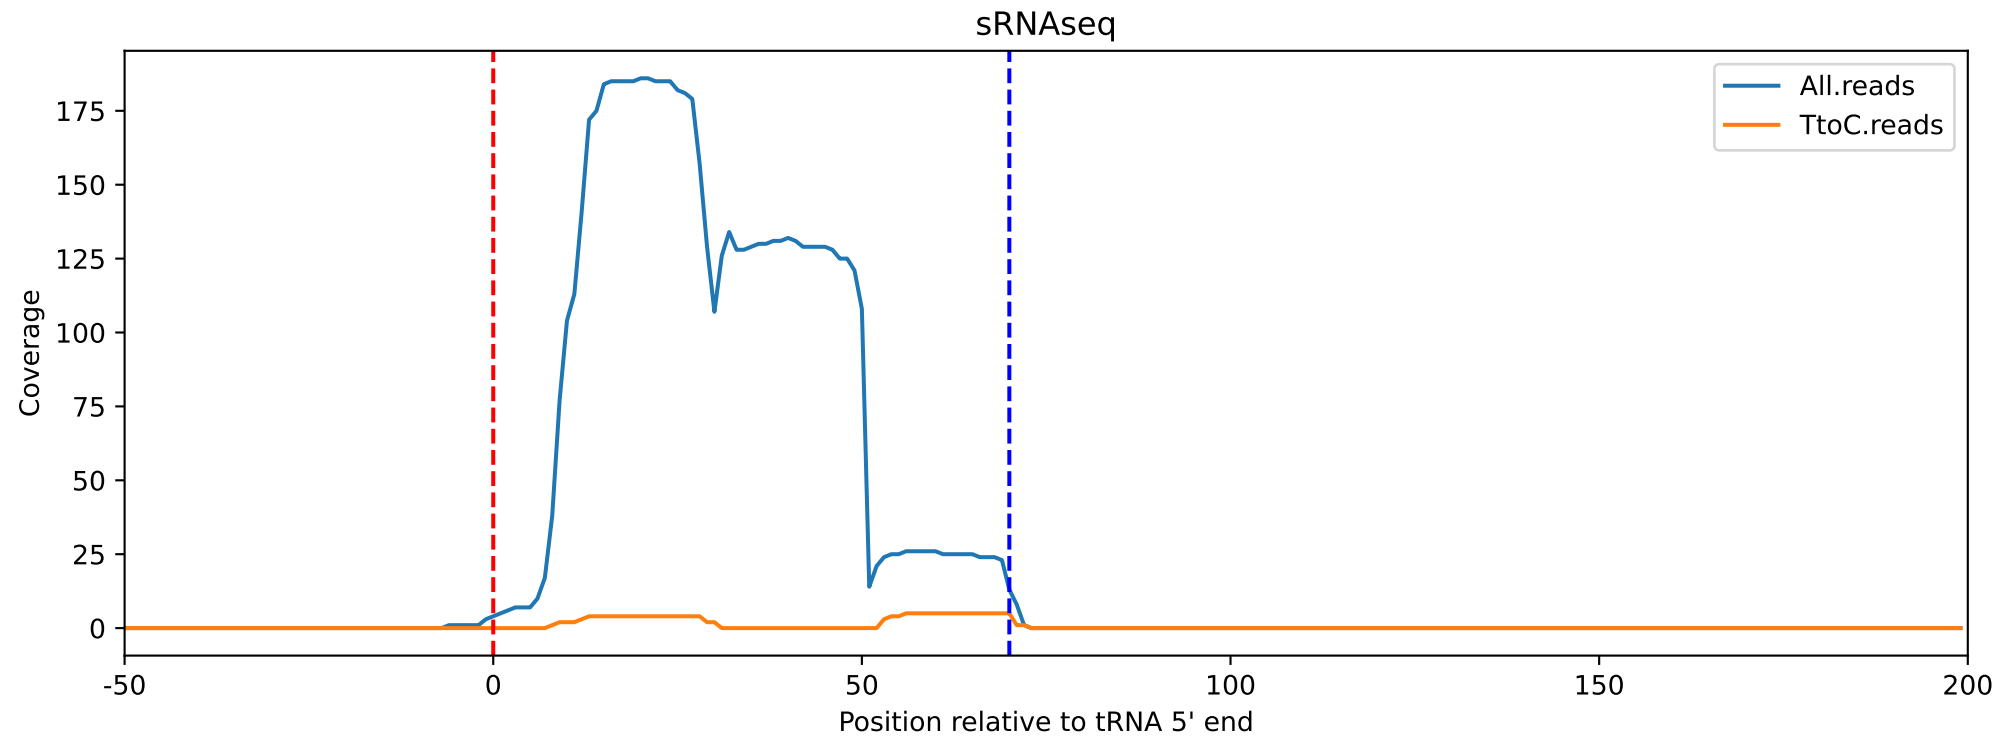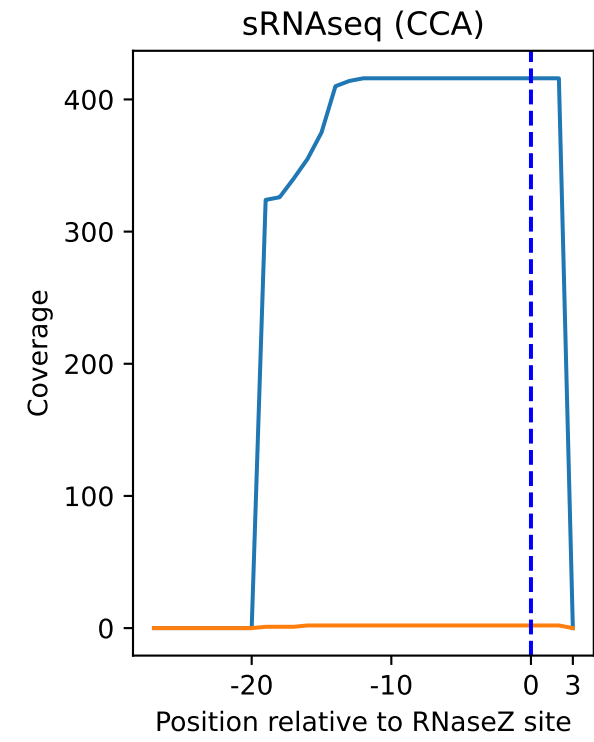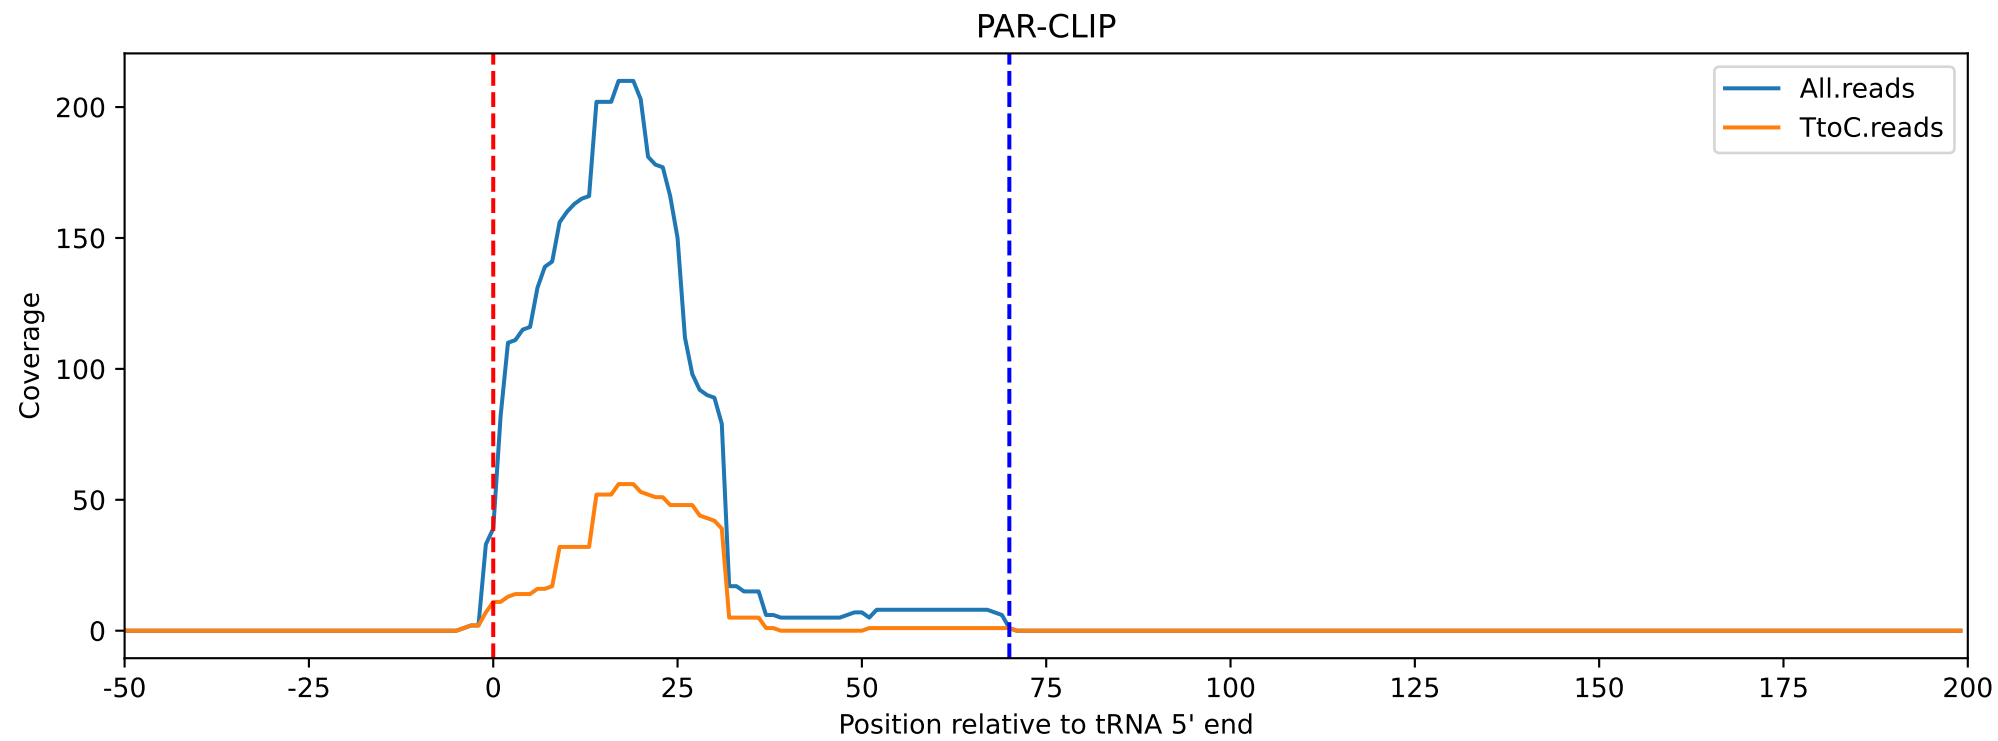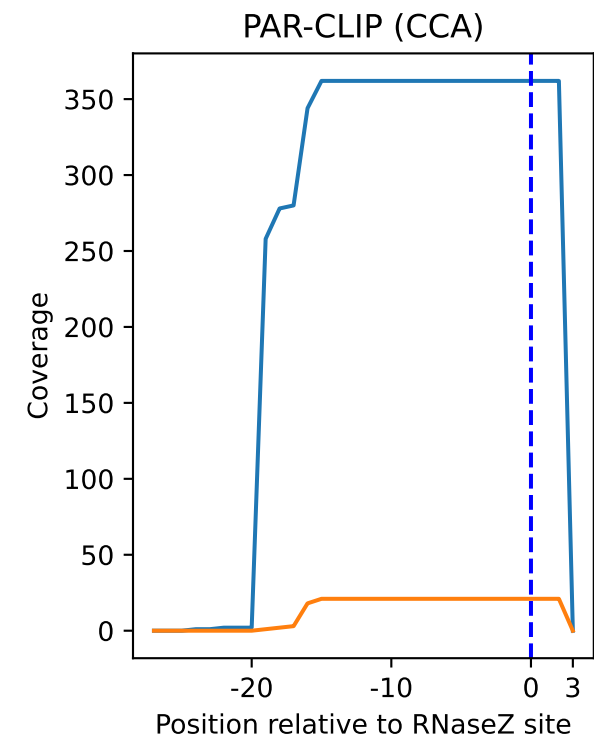

# tRNA-Leu-TAA-2-1

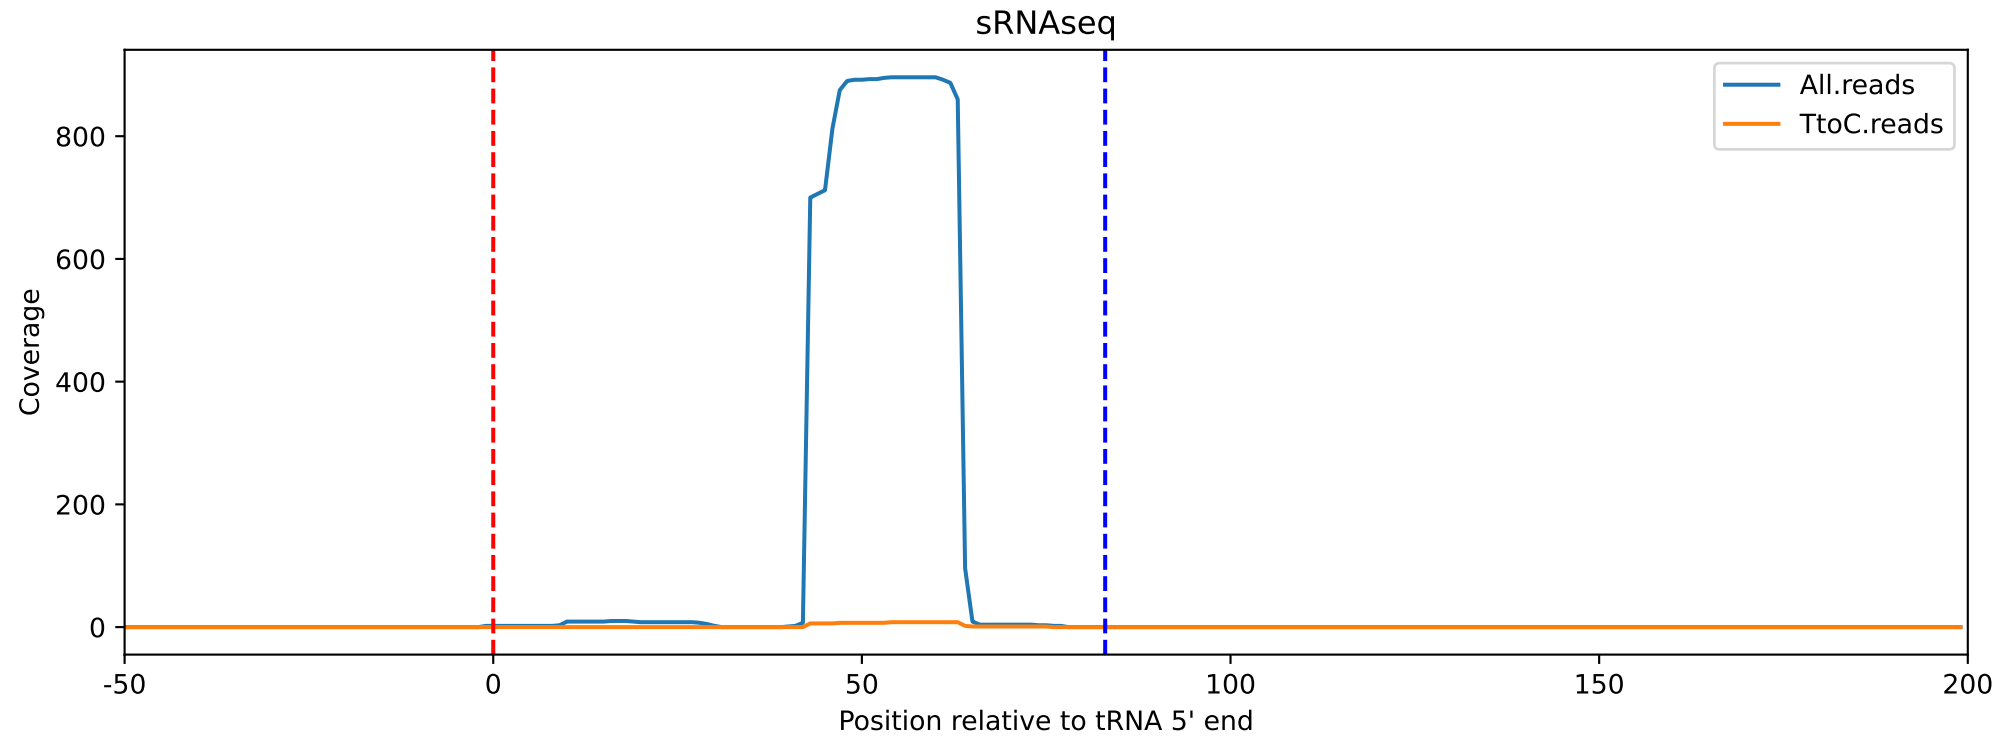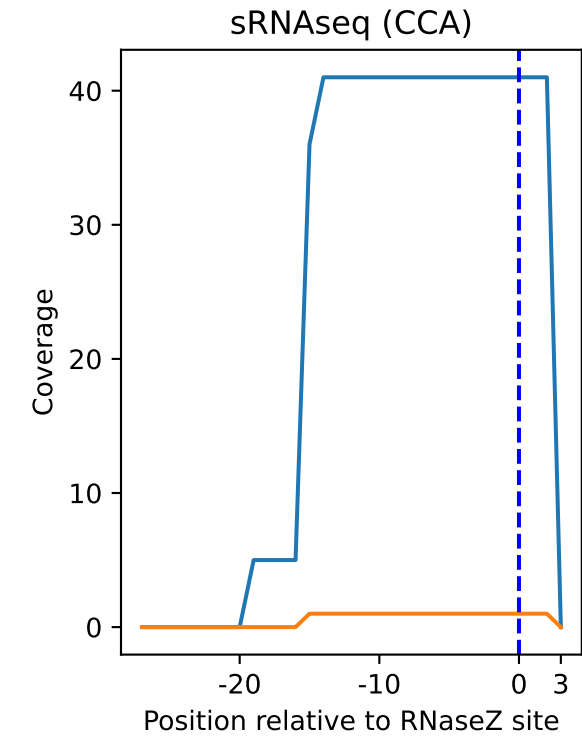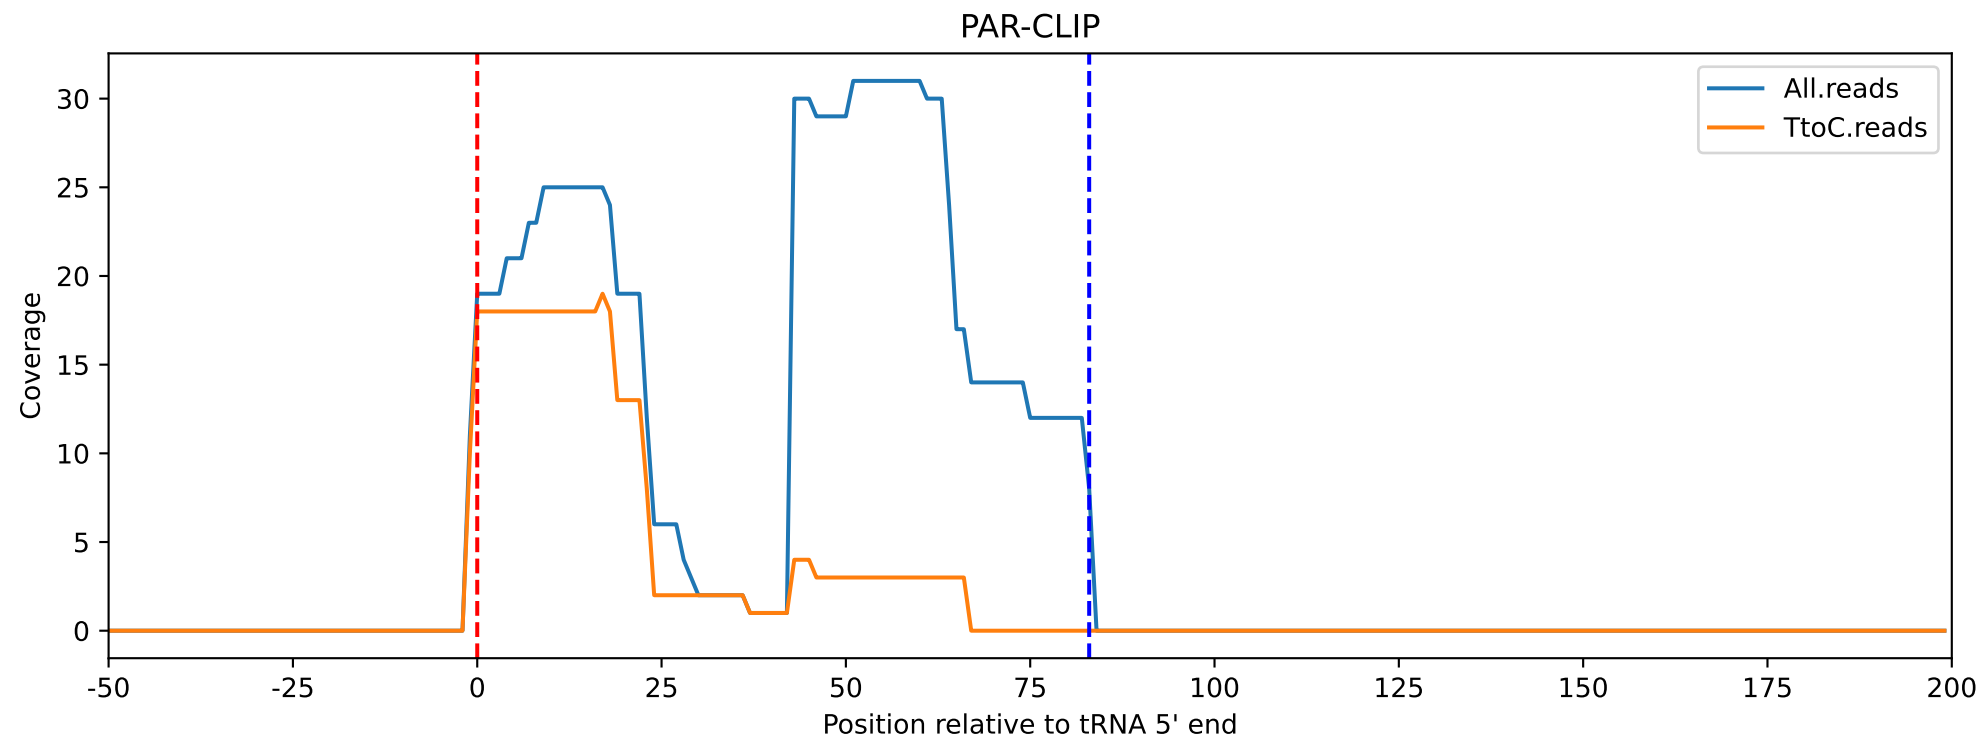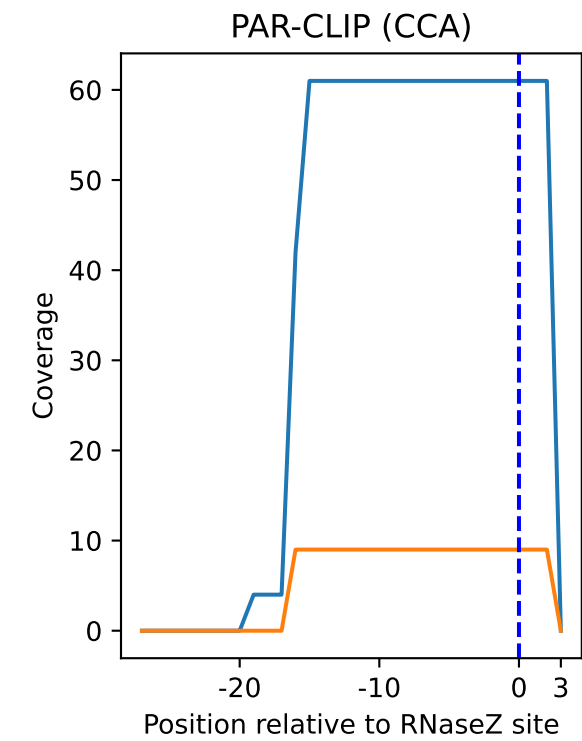

# tRNA-Lys-CTT-1-10

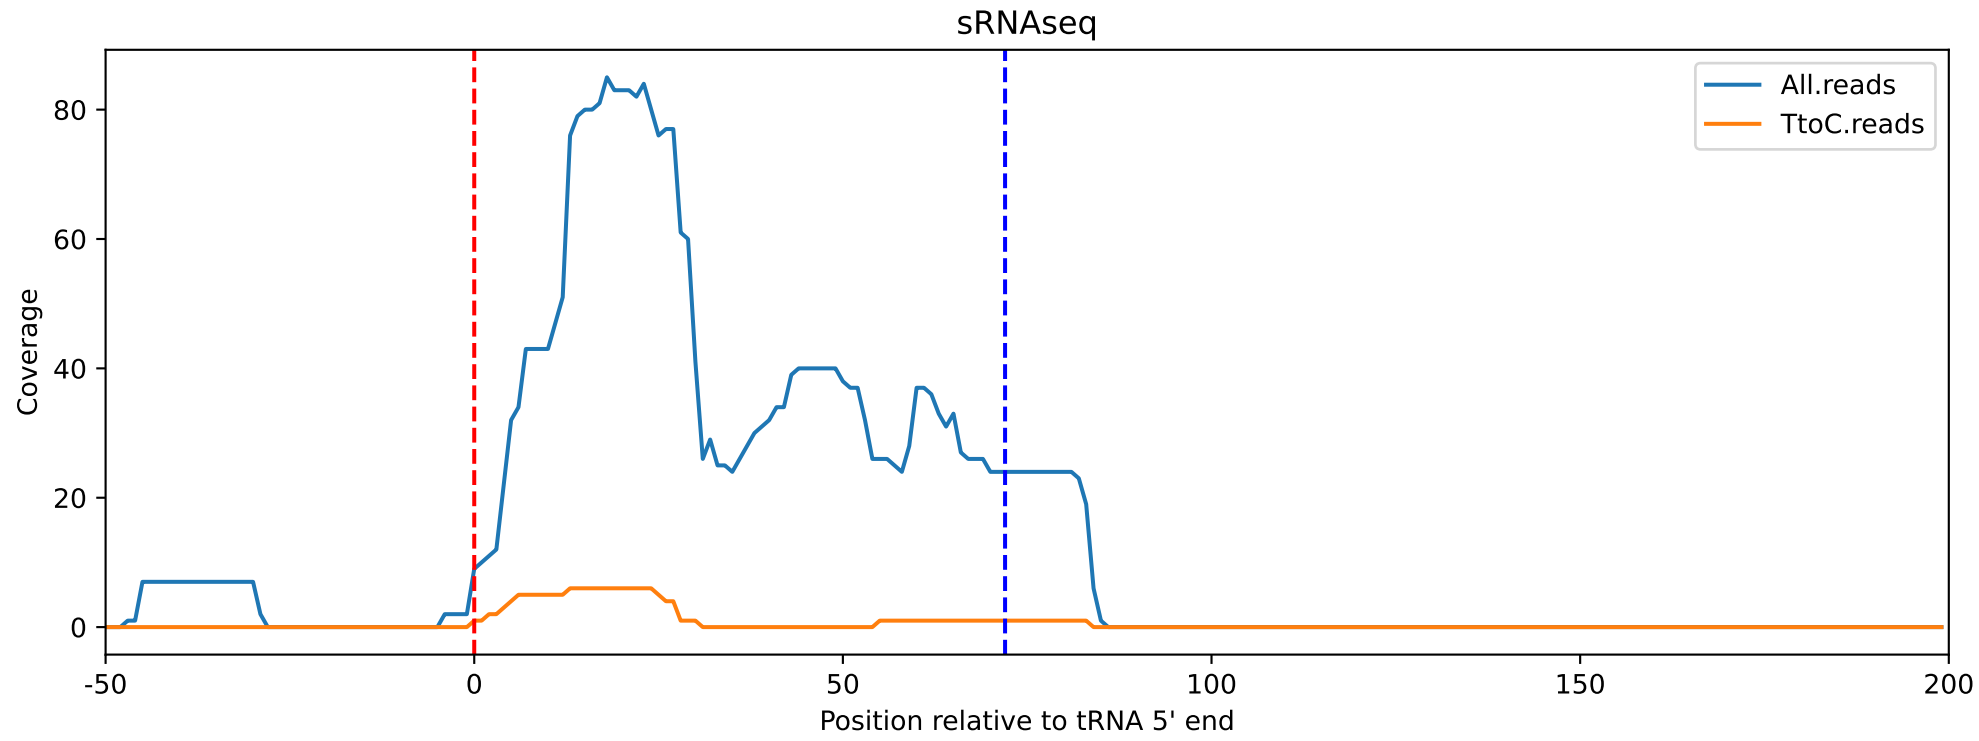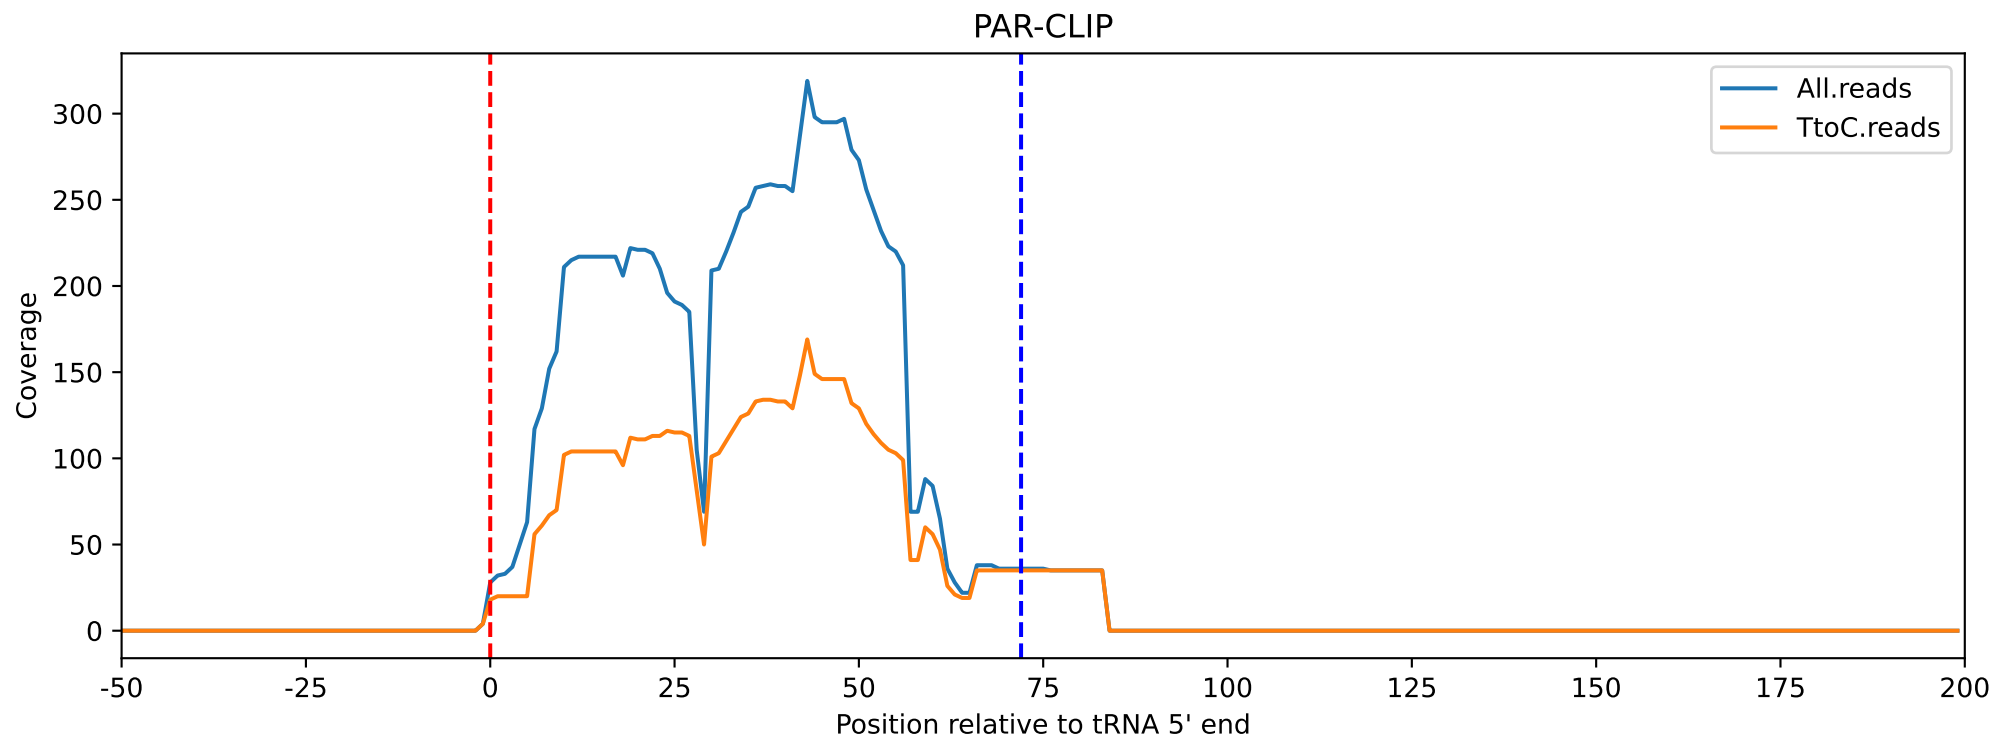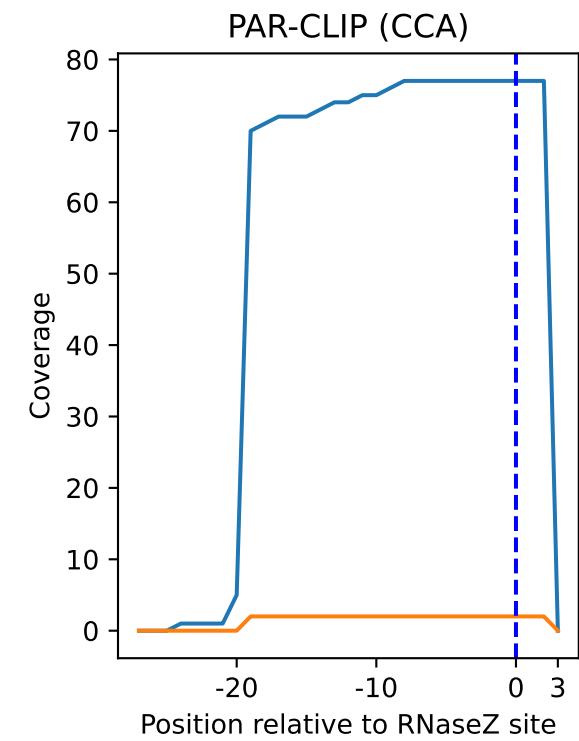

# tRNA-Asp-GTC-1-6

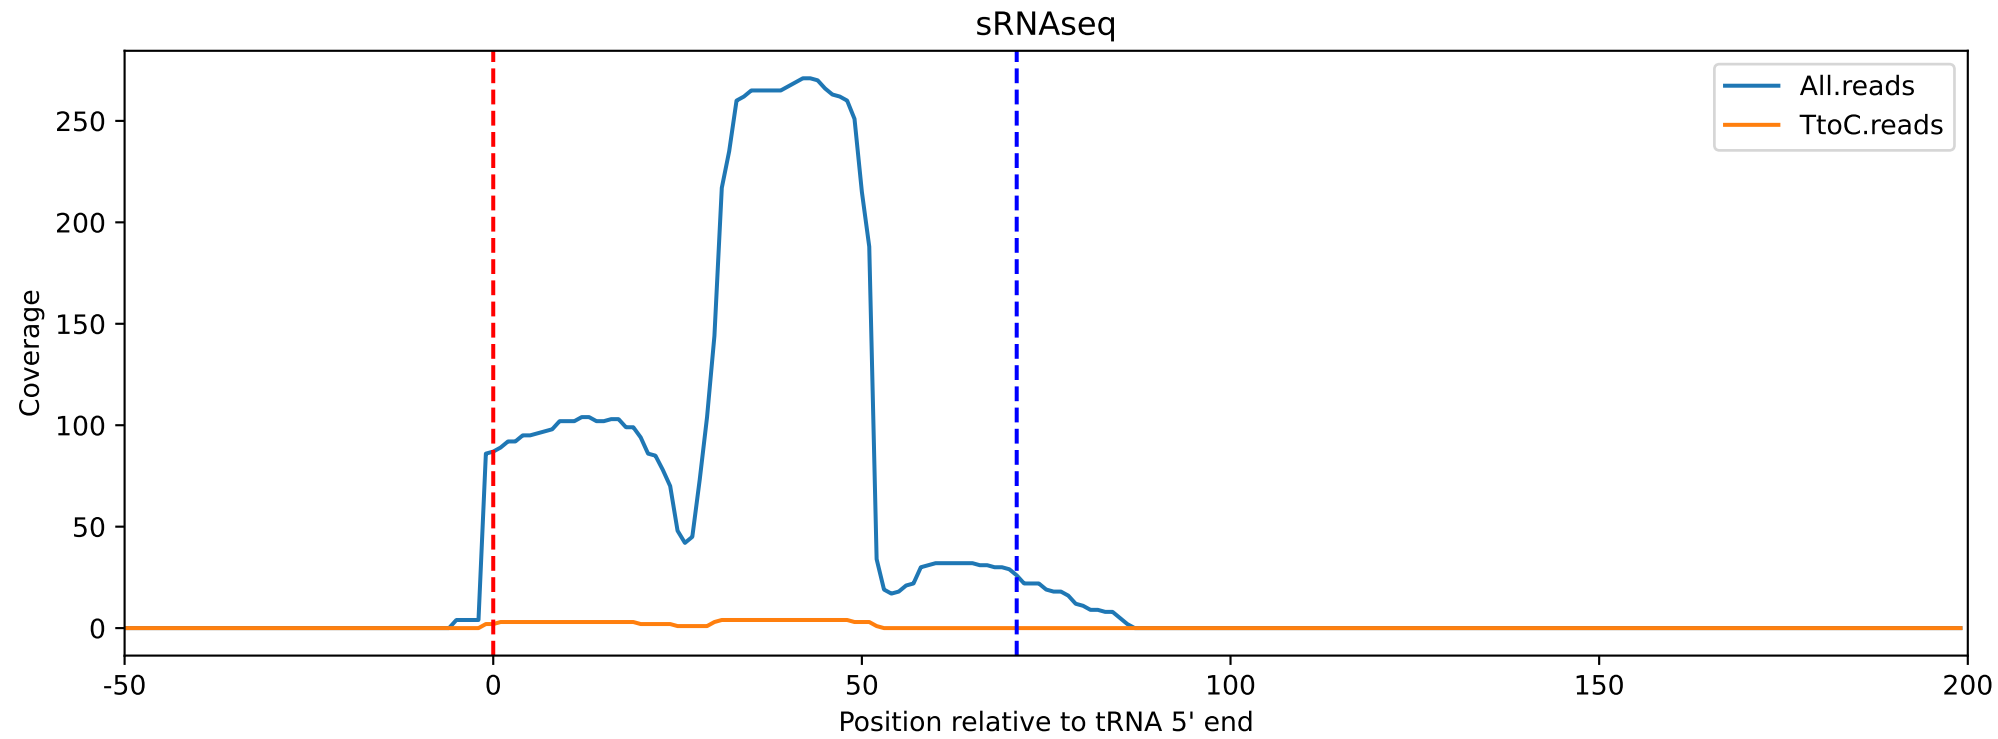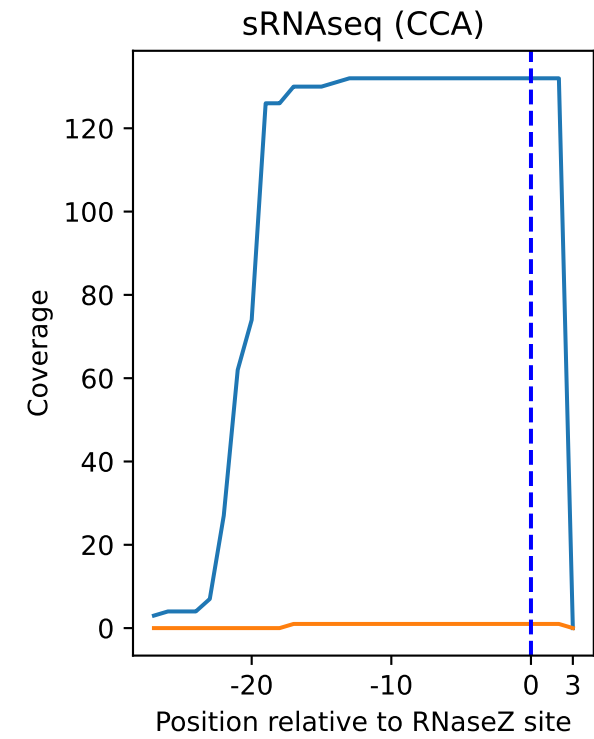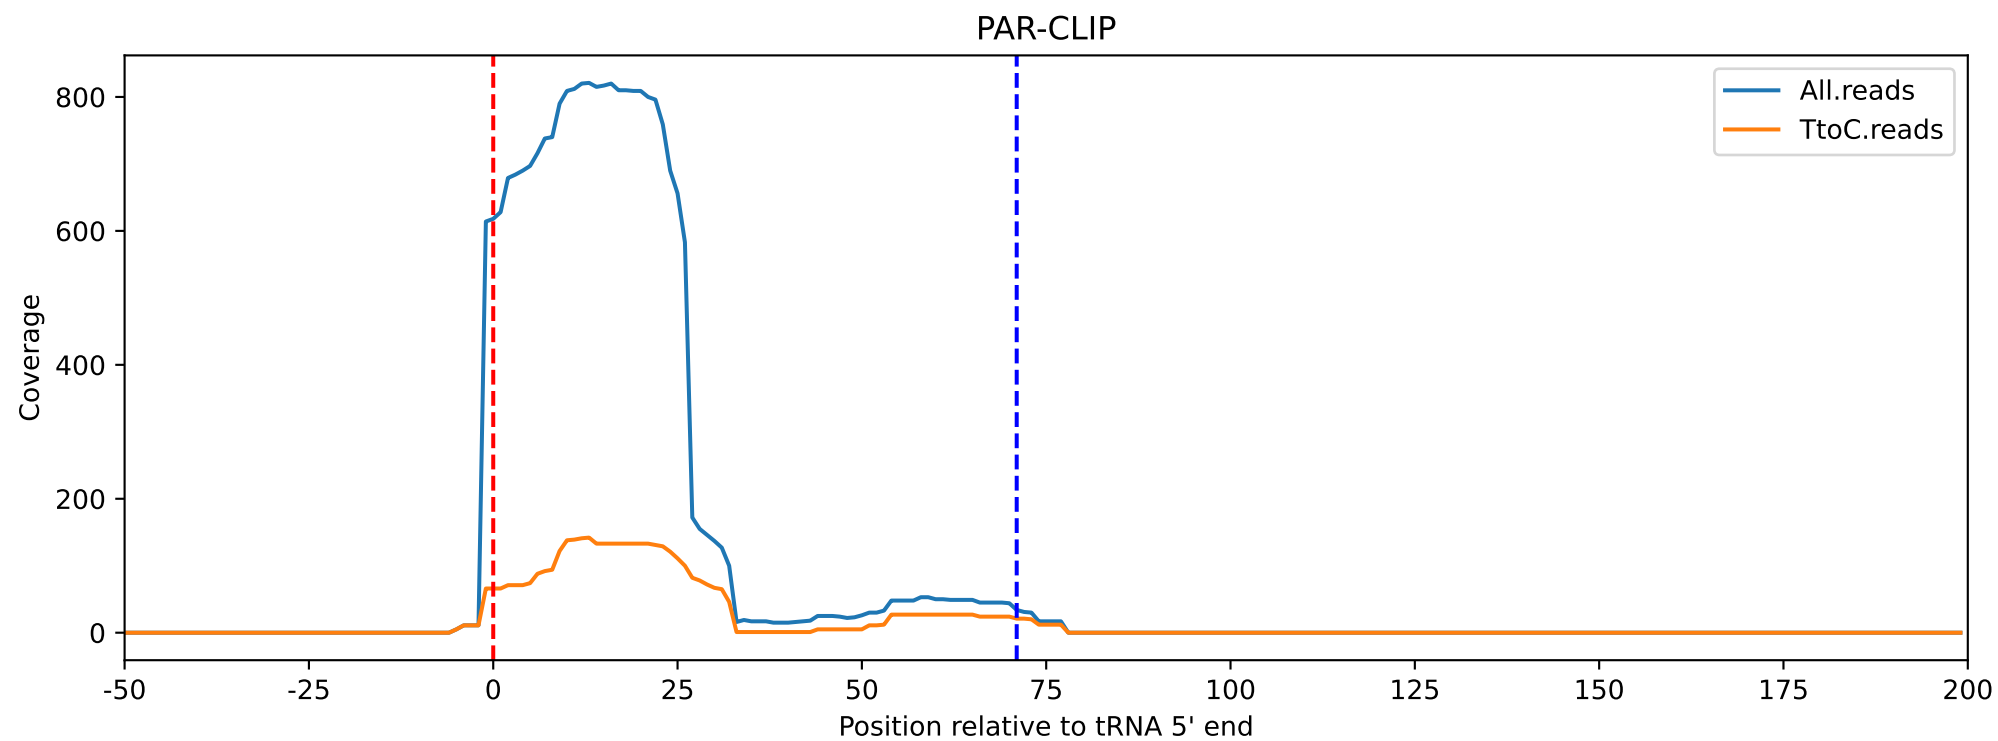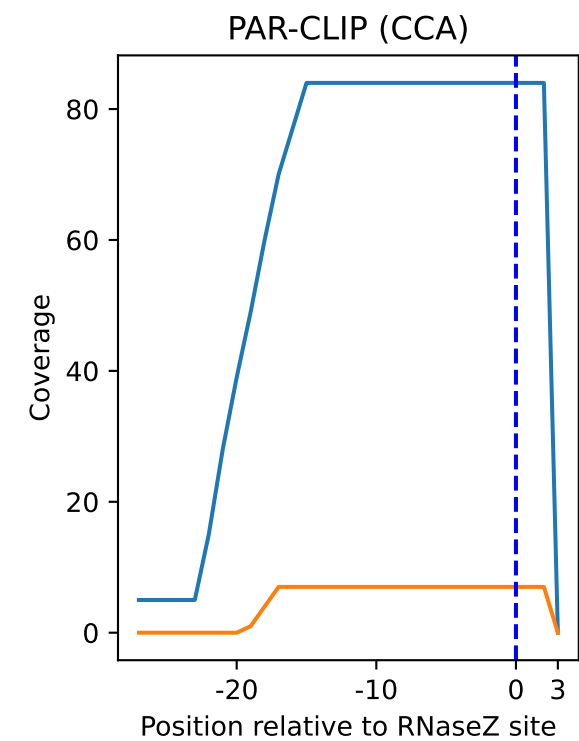



# tRNA-Met-CAT-1-2

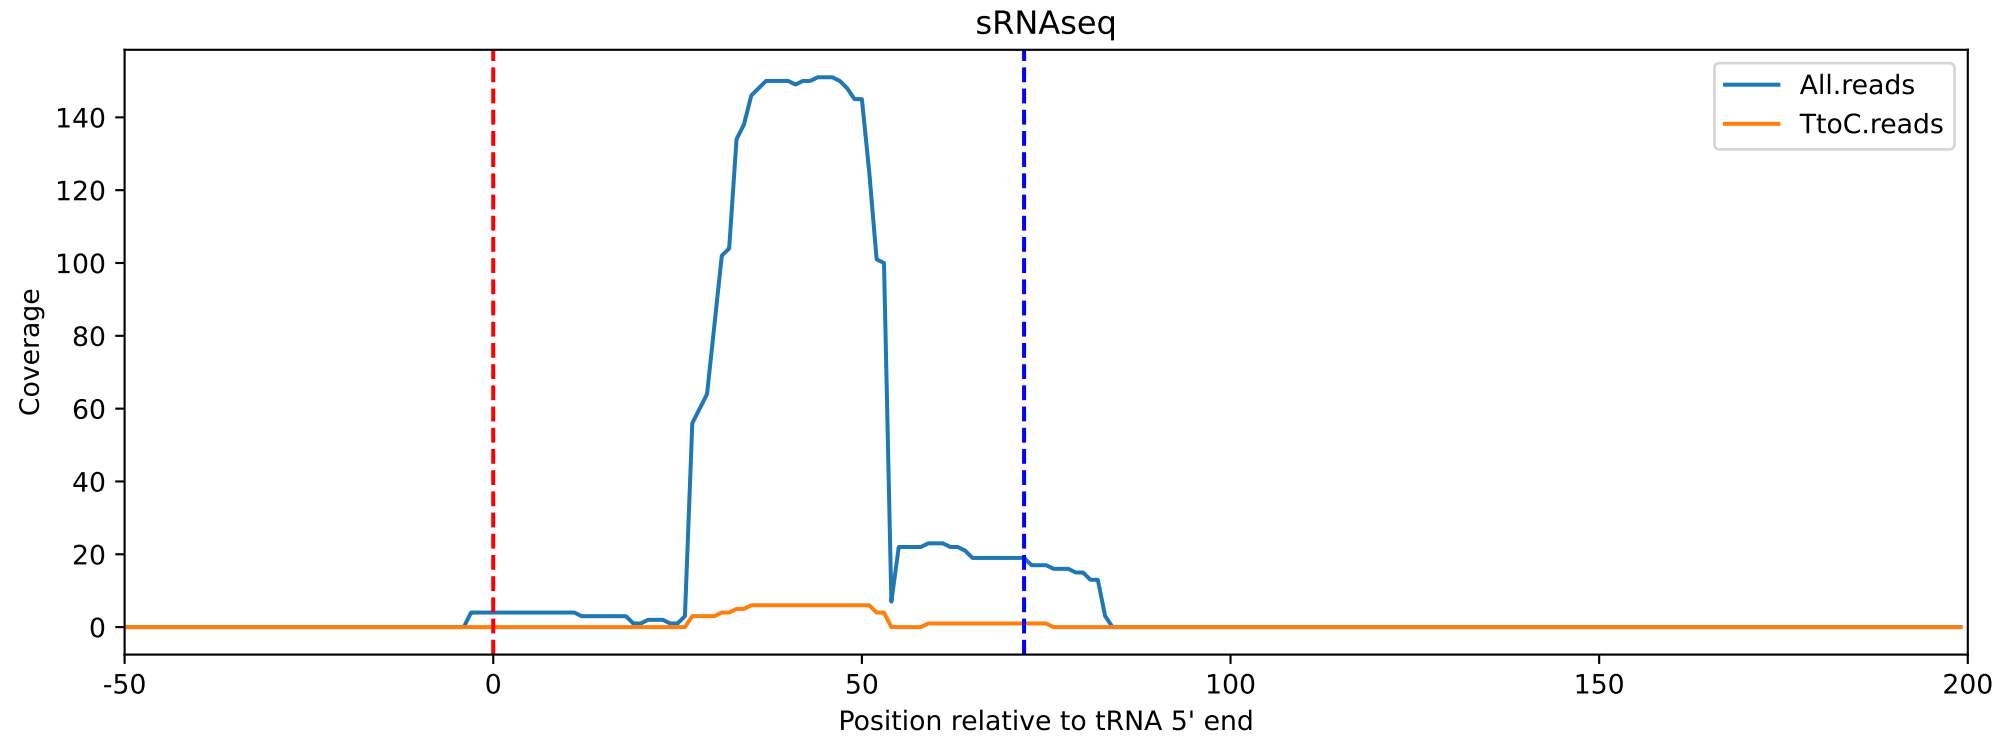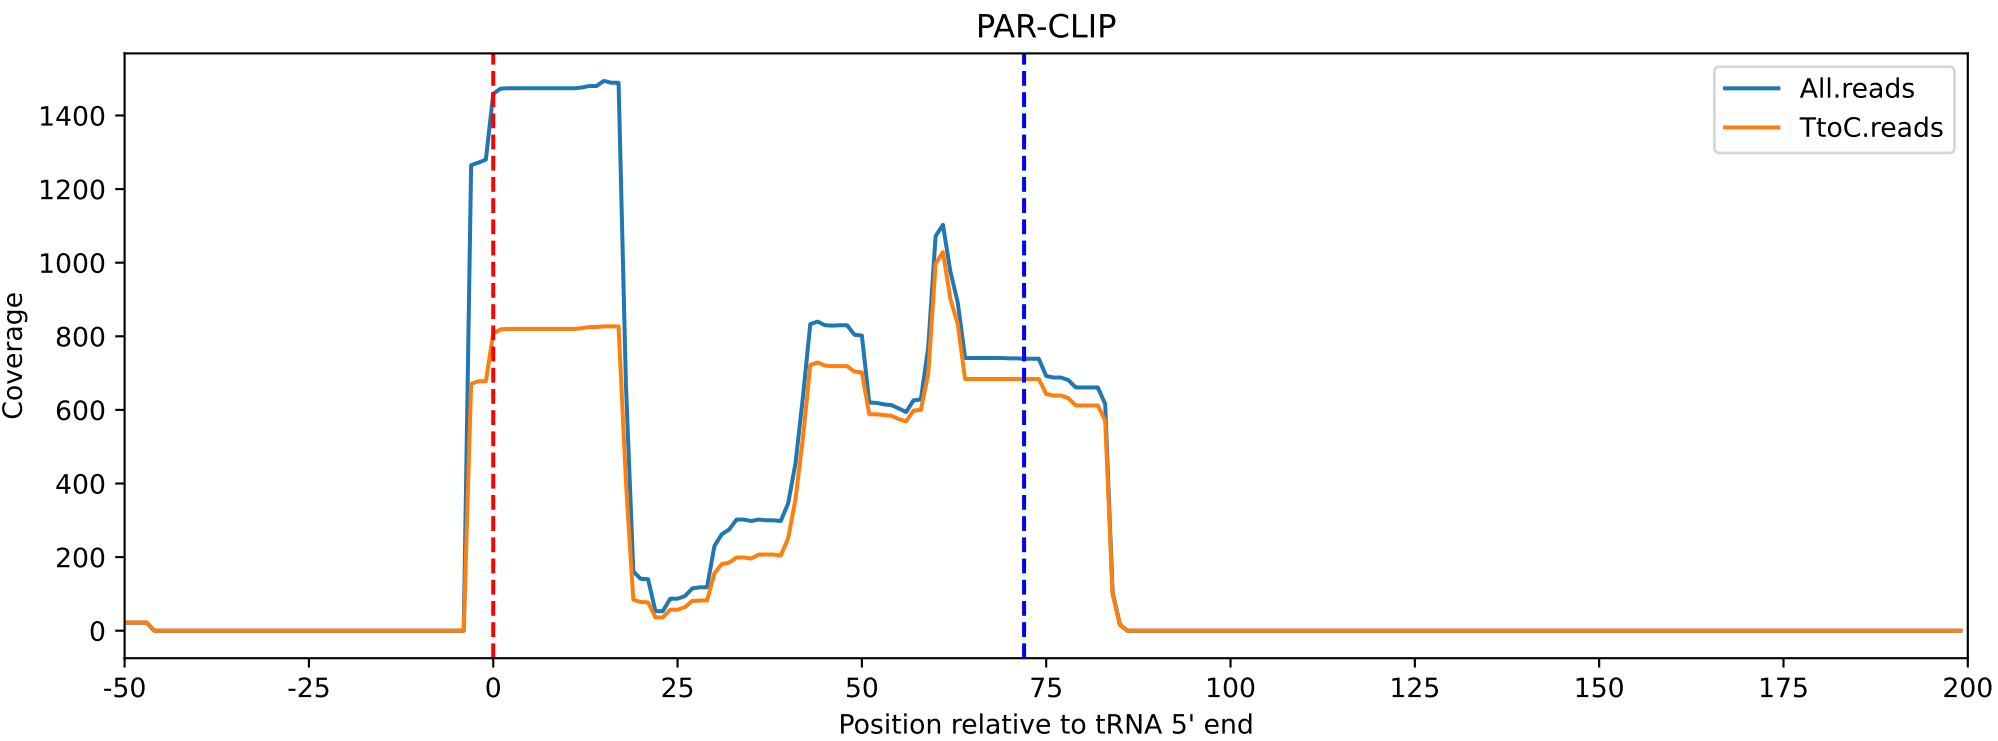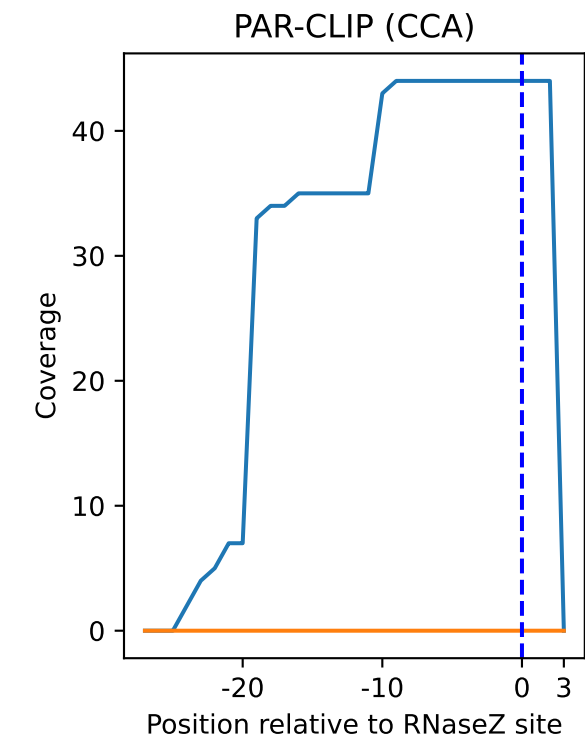

# tRNA-Glu-TTC-1-4

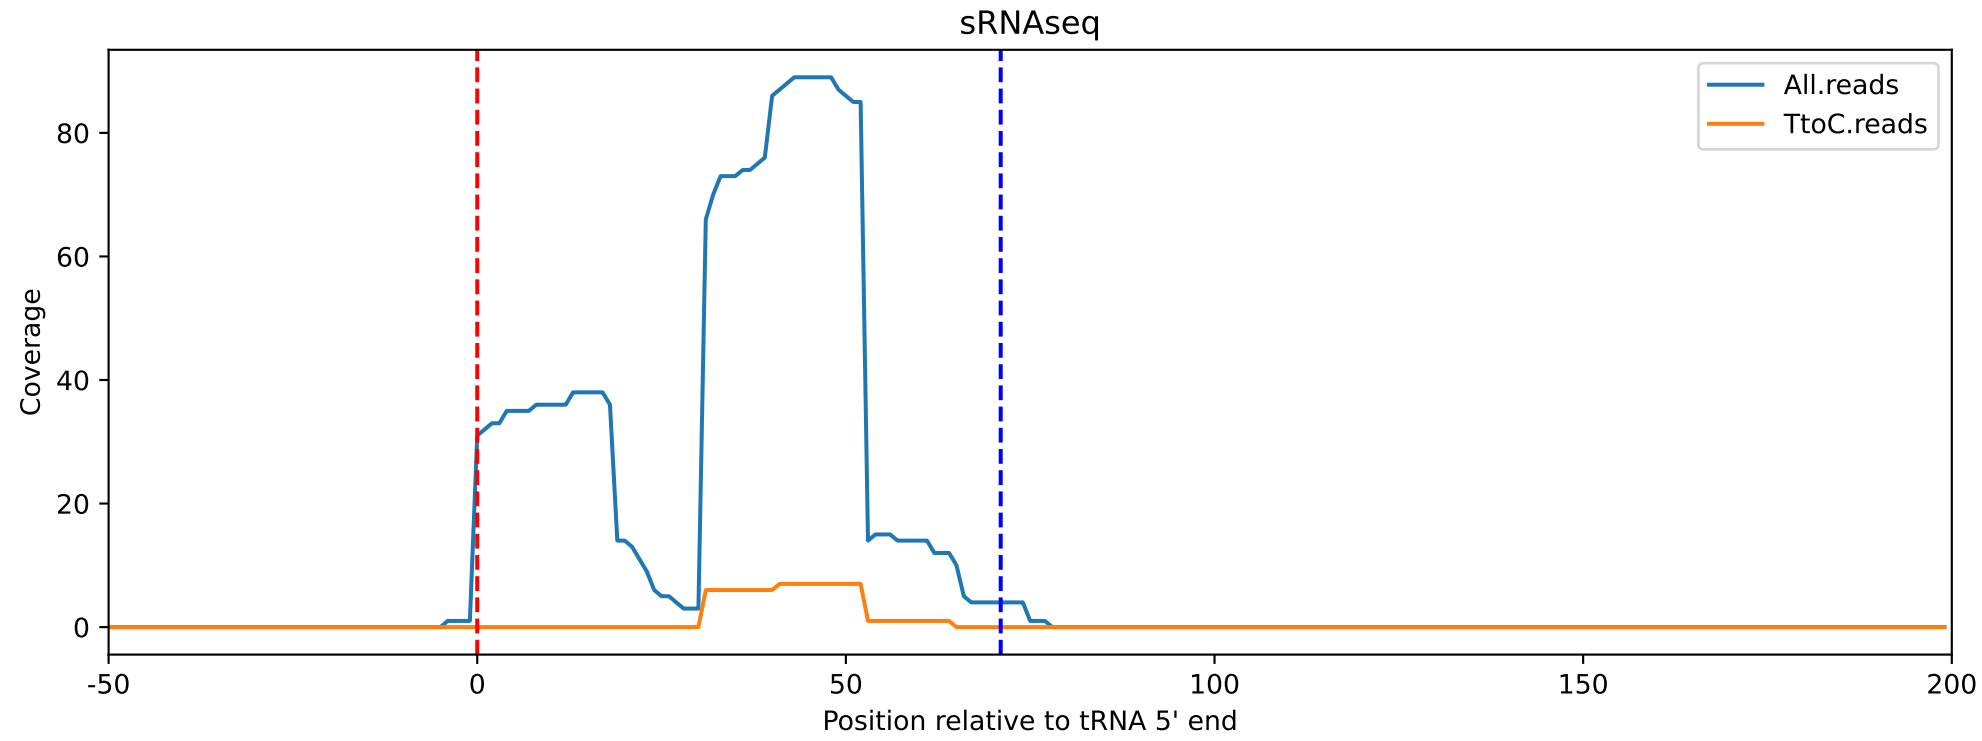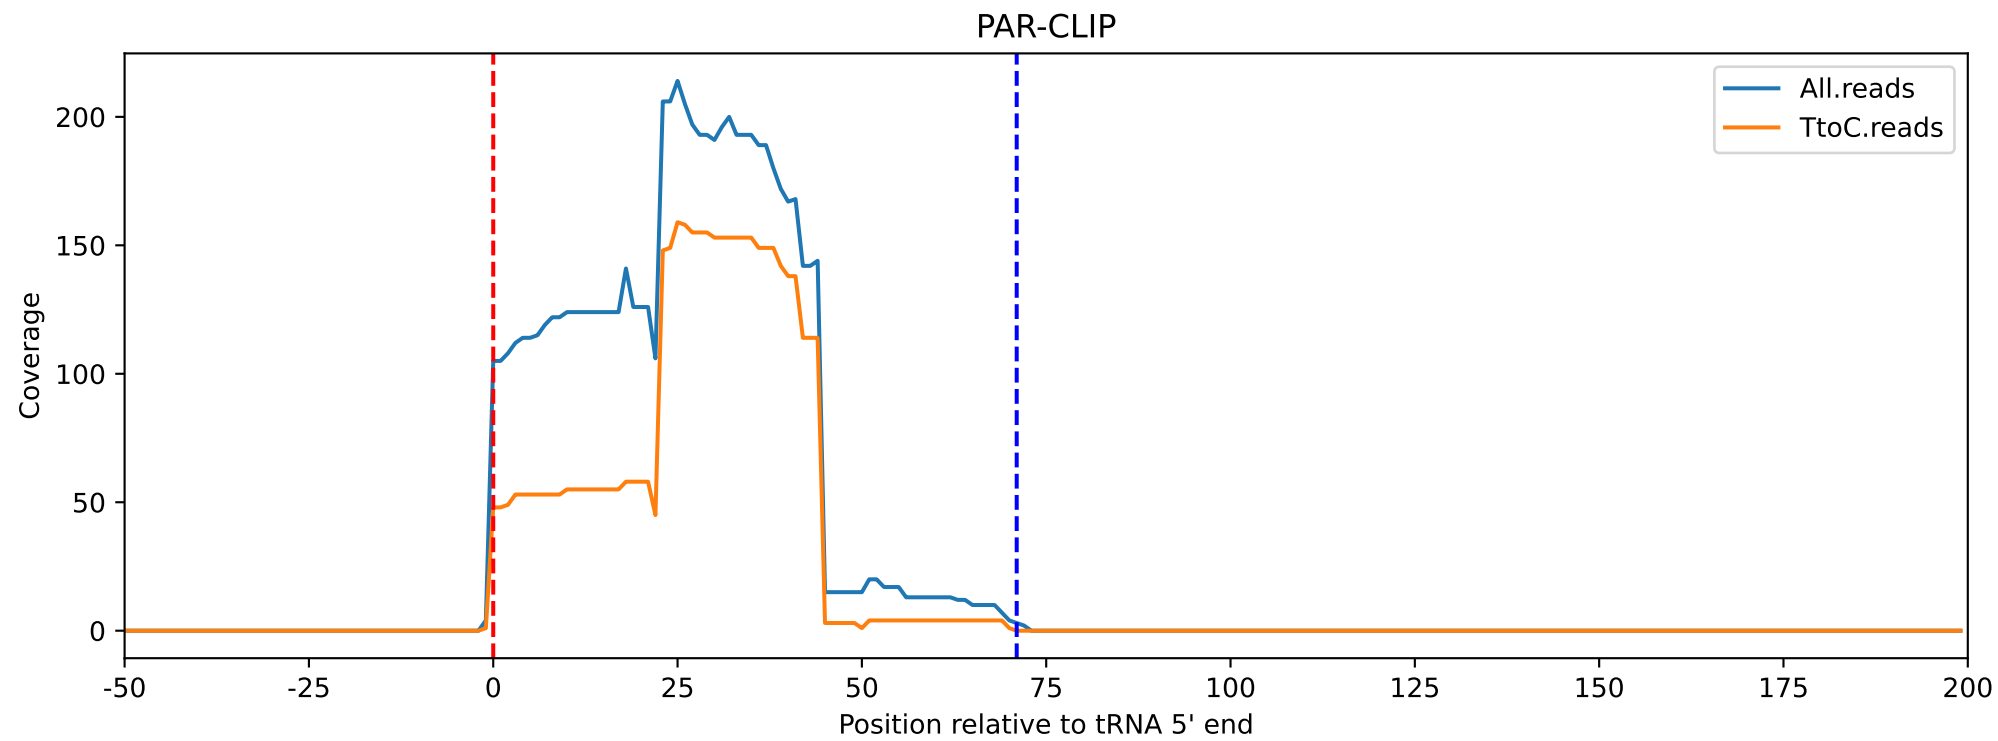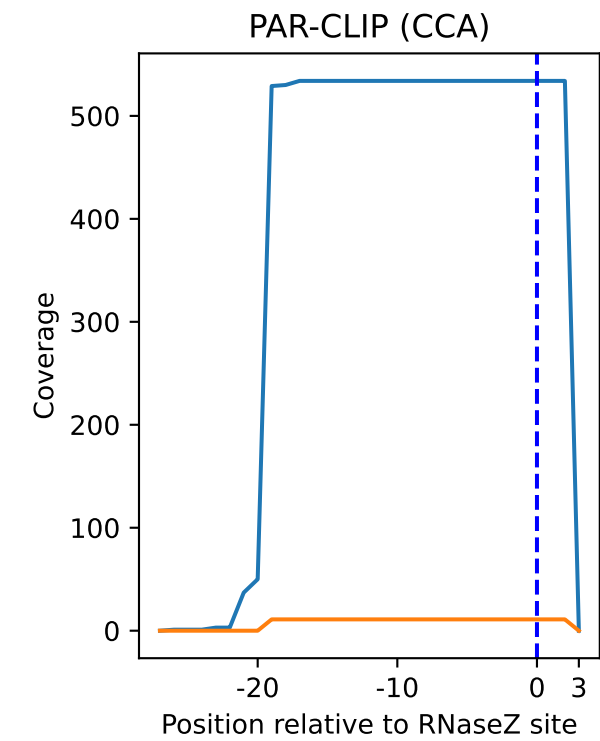

# tRNA-Met-CAT-1-5

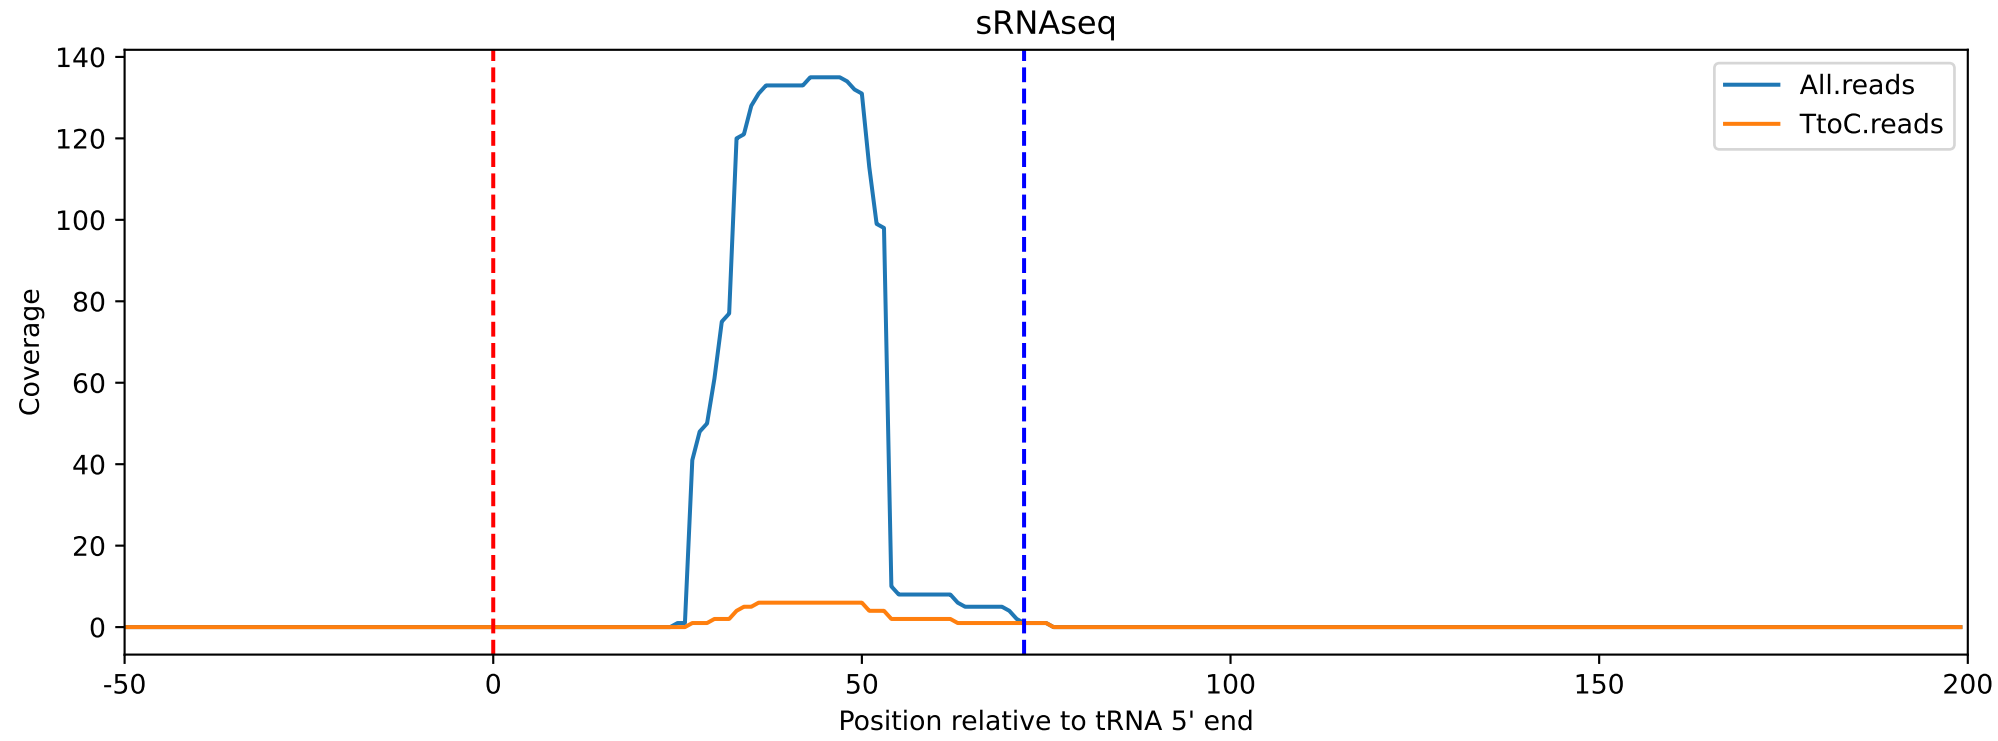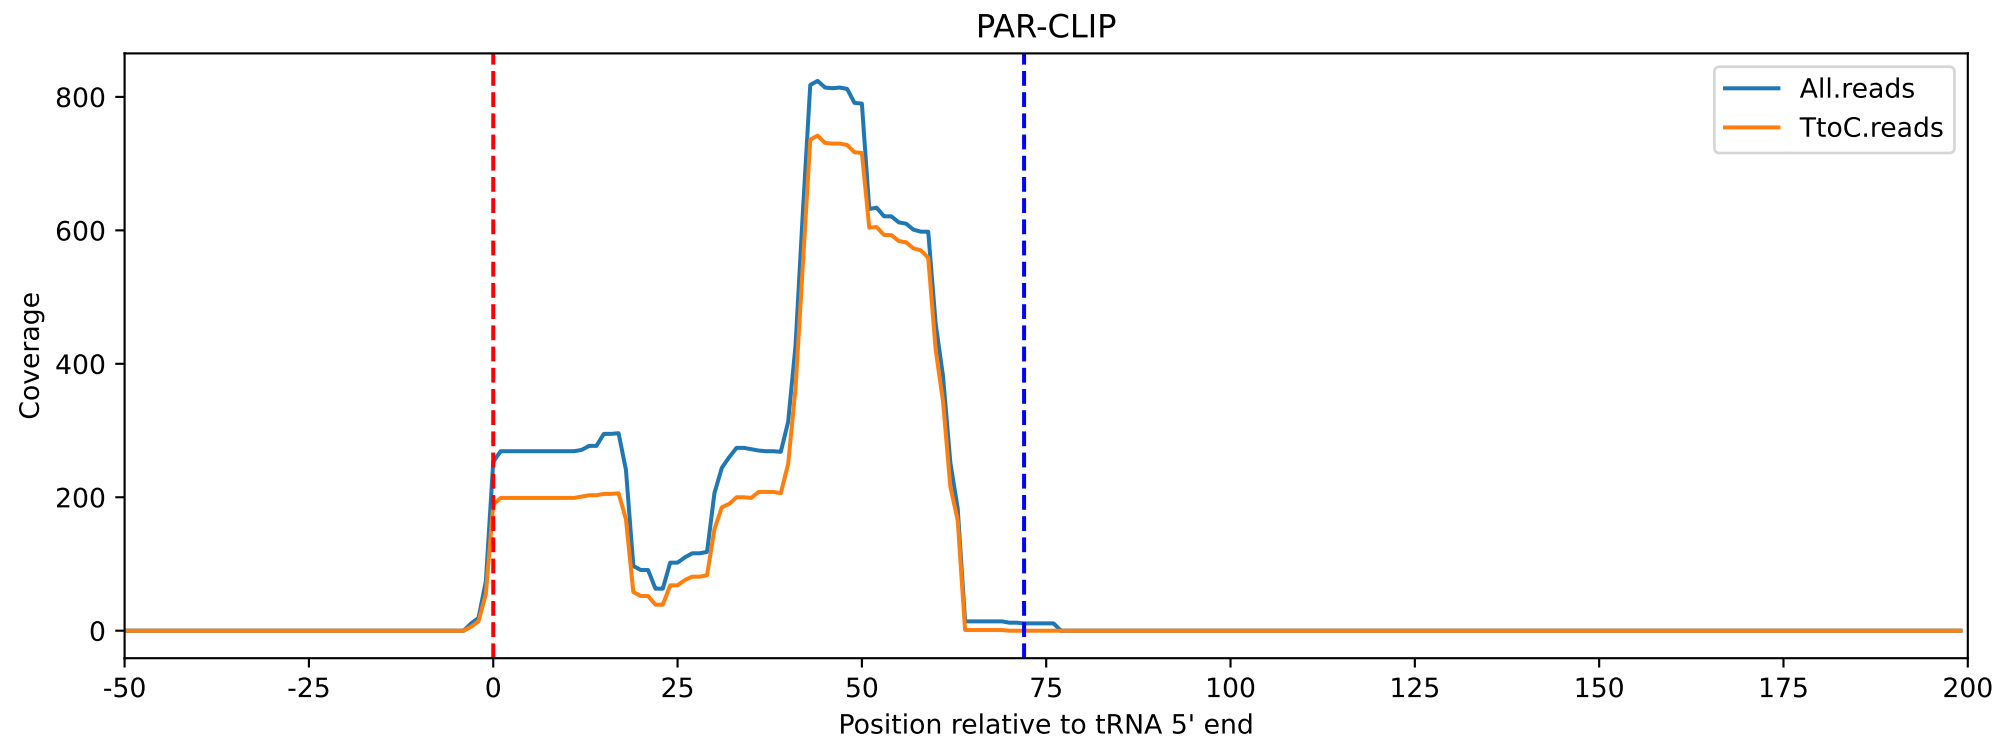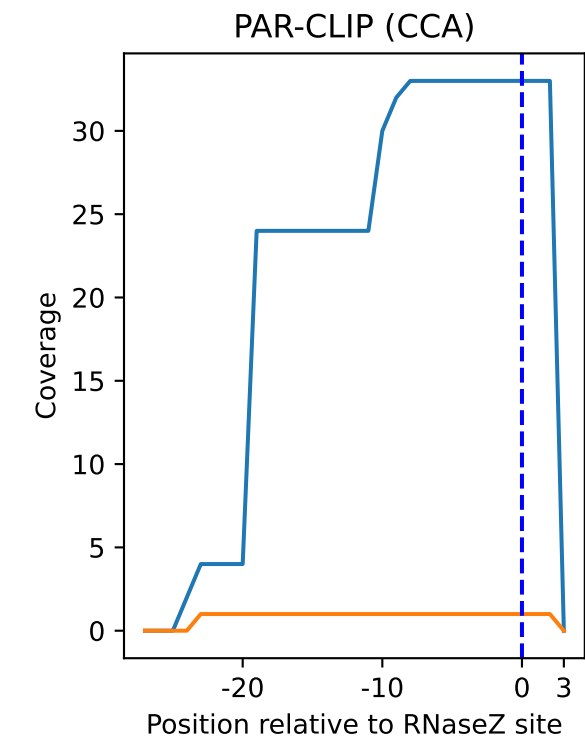

# tRNA-His-GTG-1-2

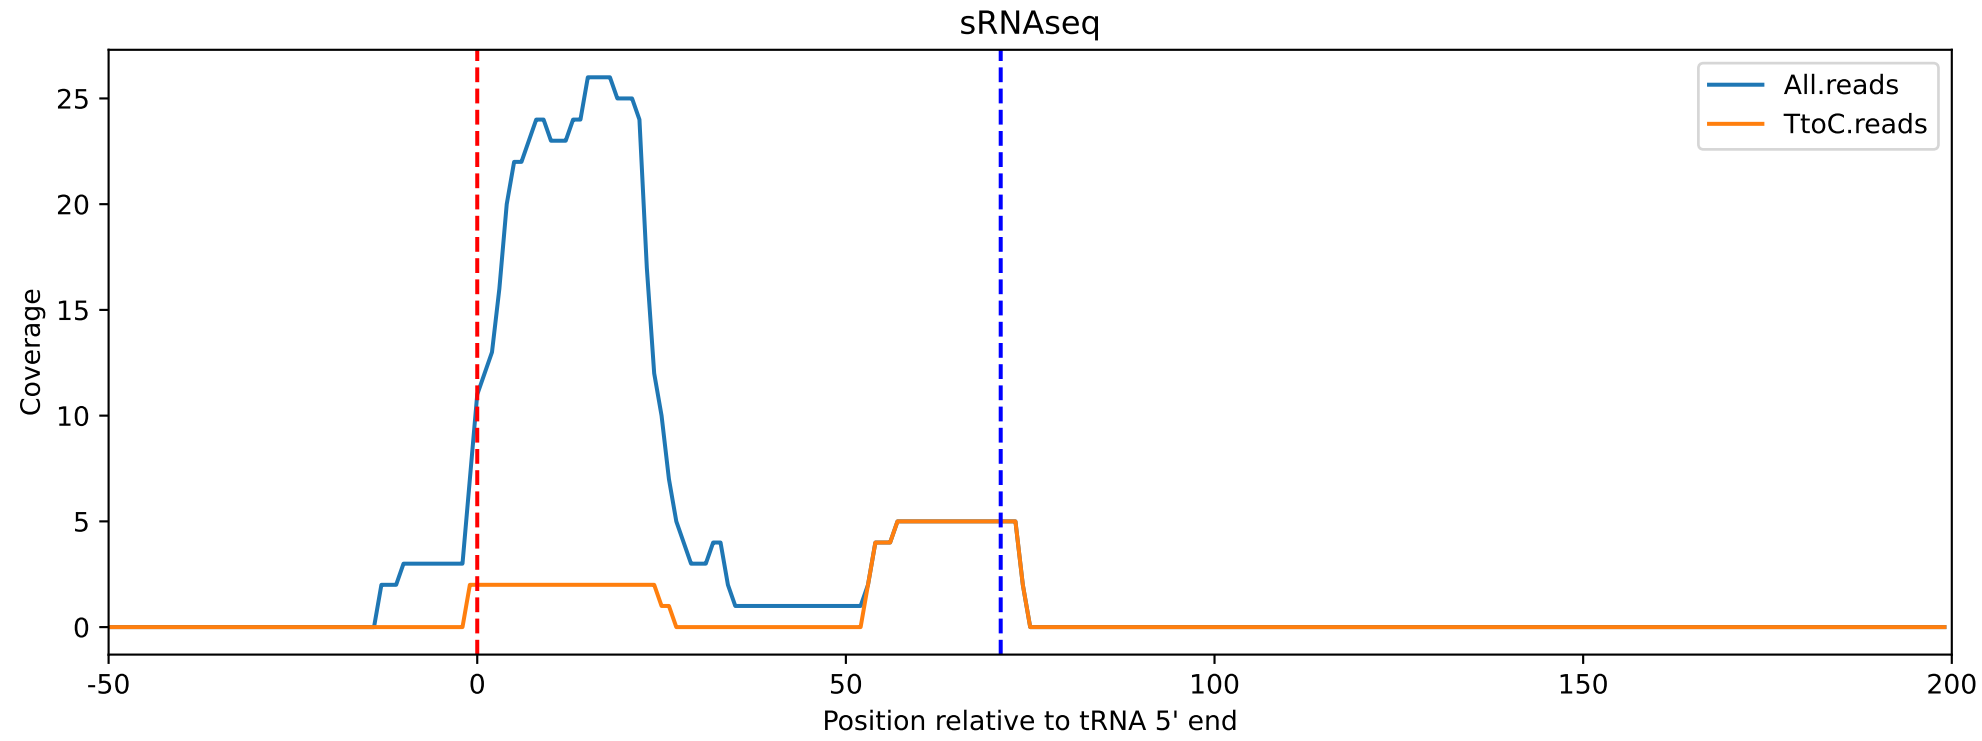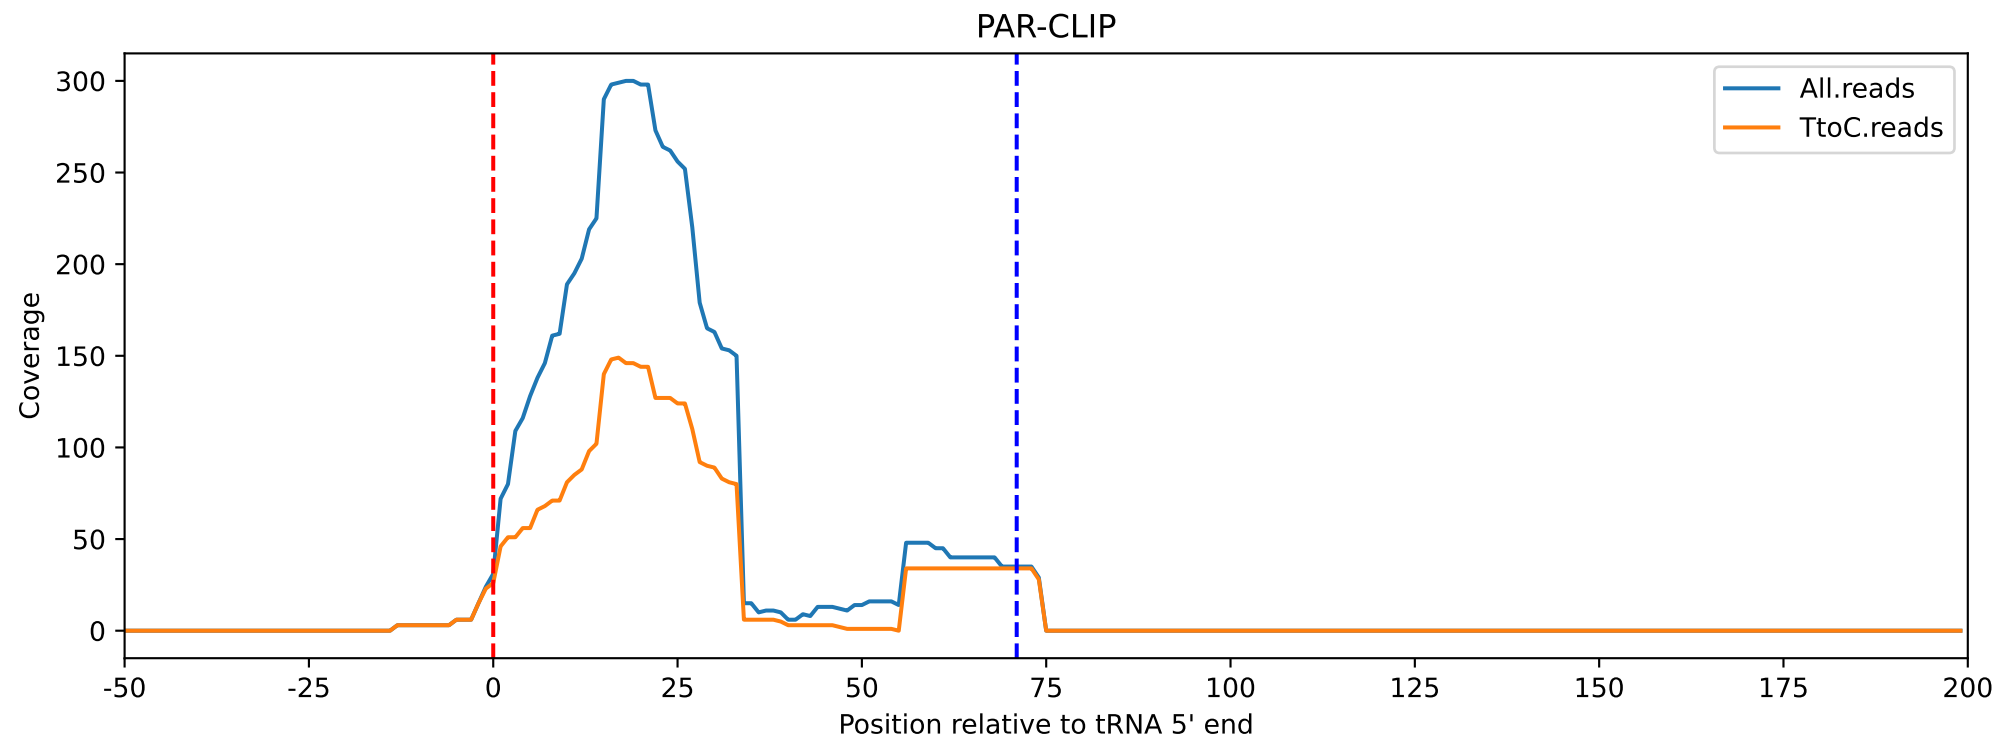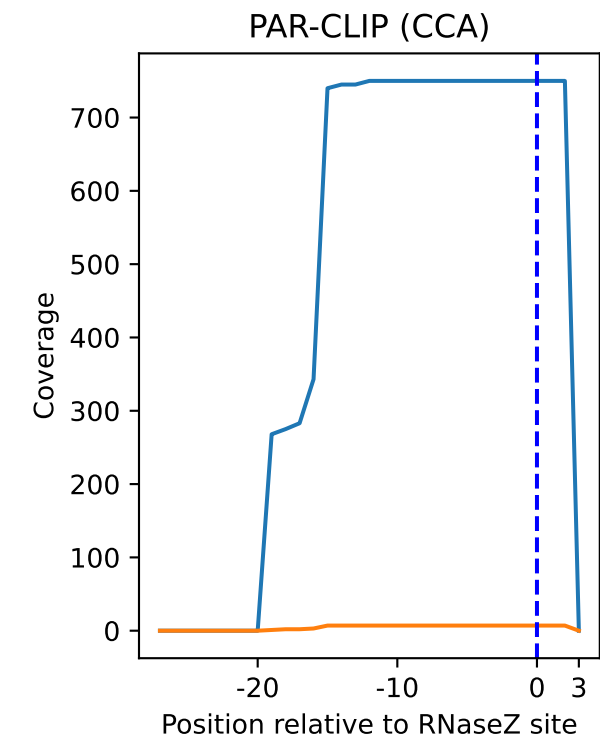

# tRNA-Arg-CCT-1-1

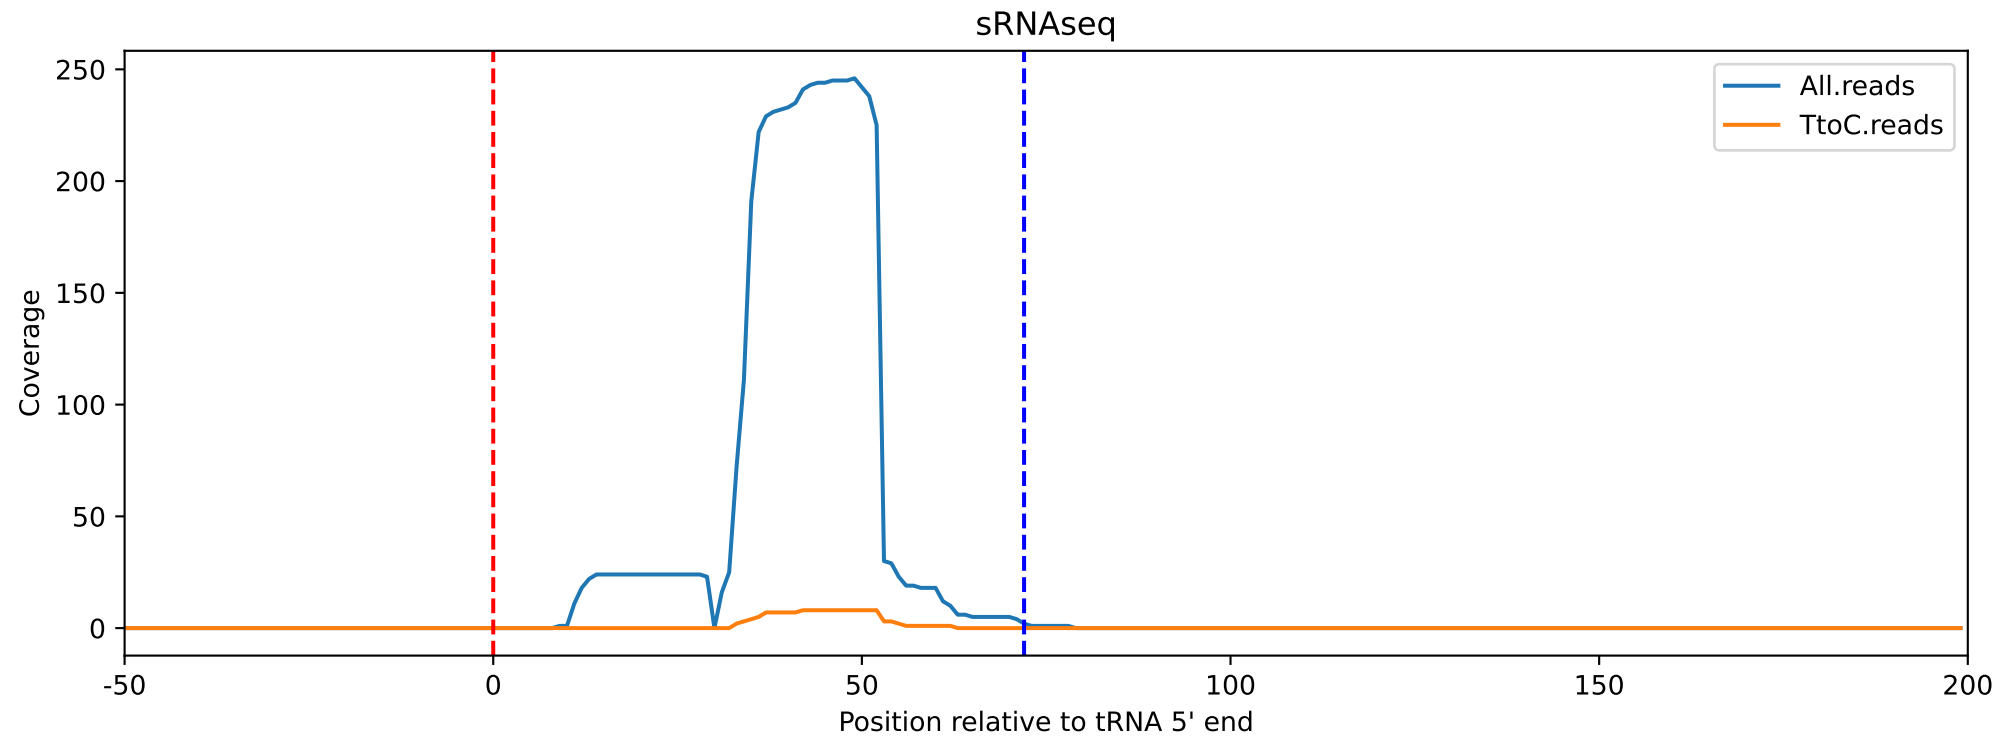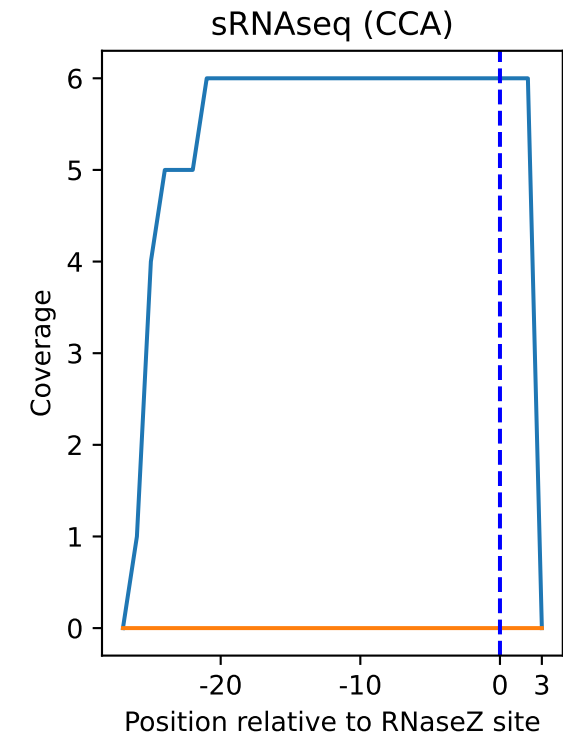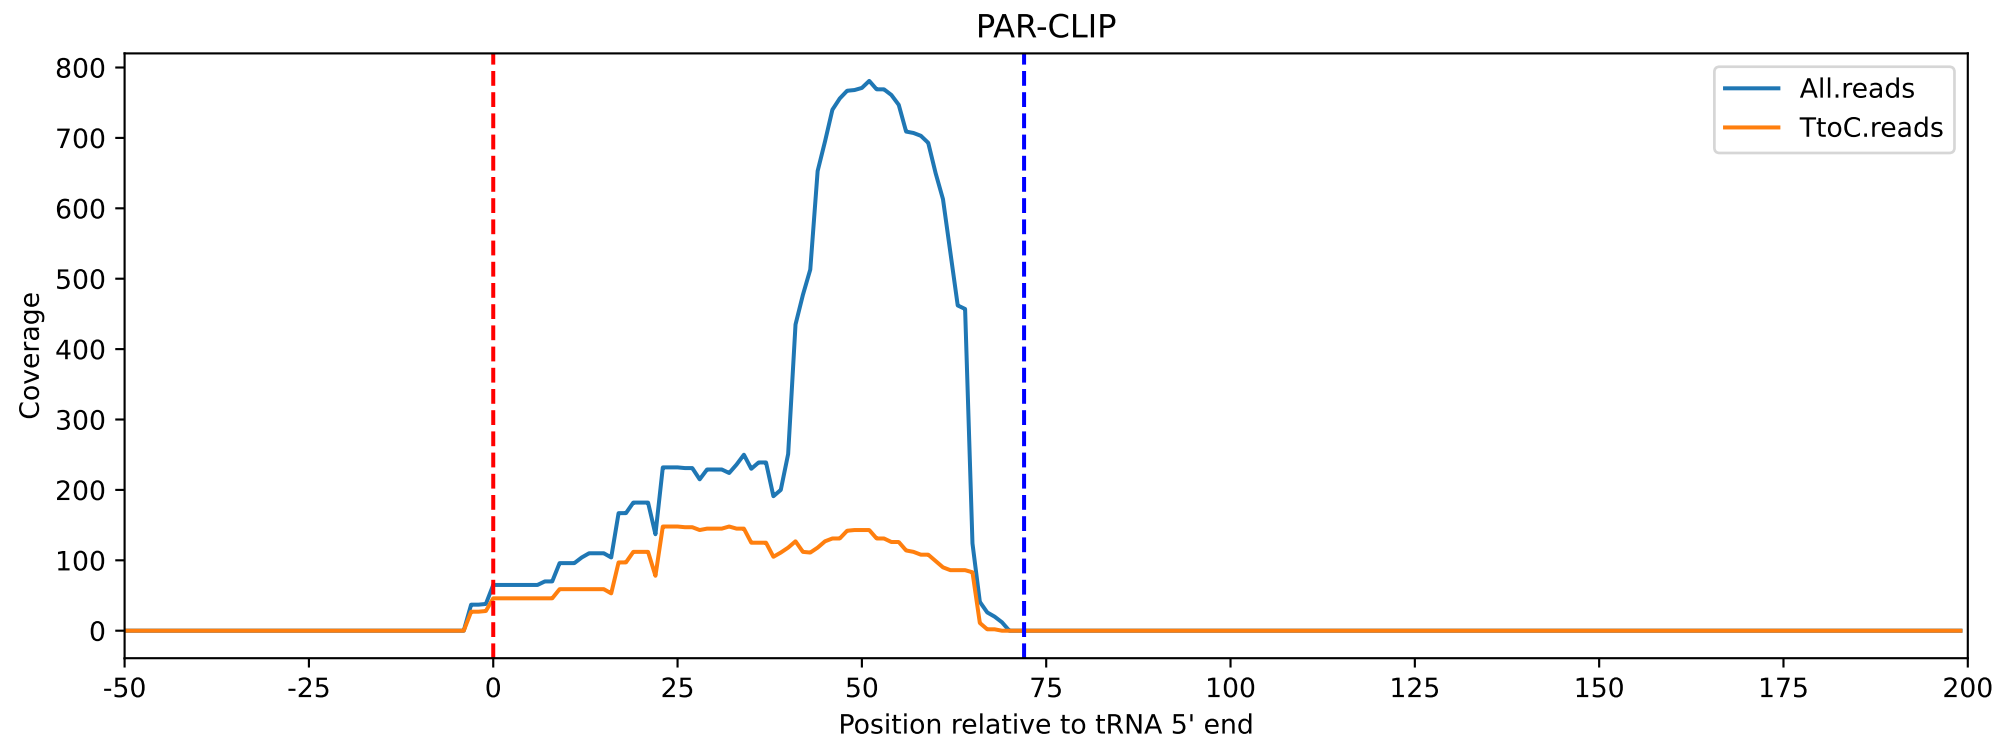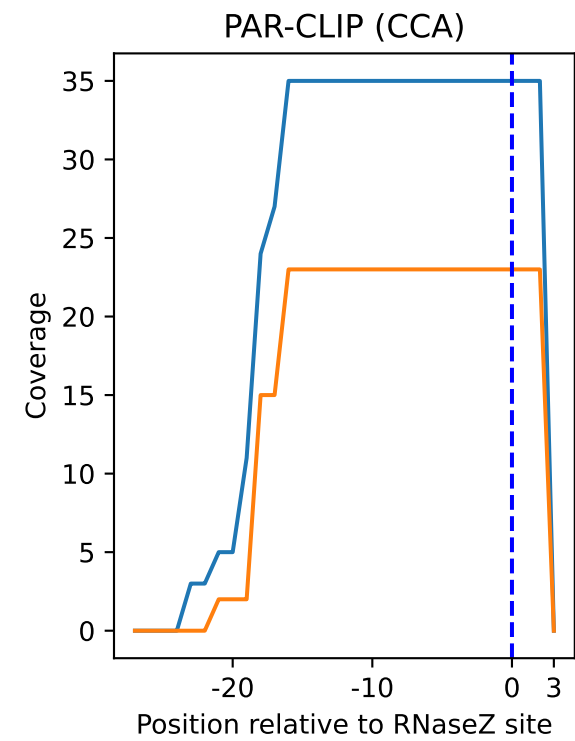

# tRNA-Ala-AGC-2-11

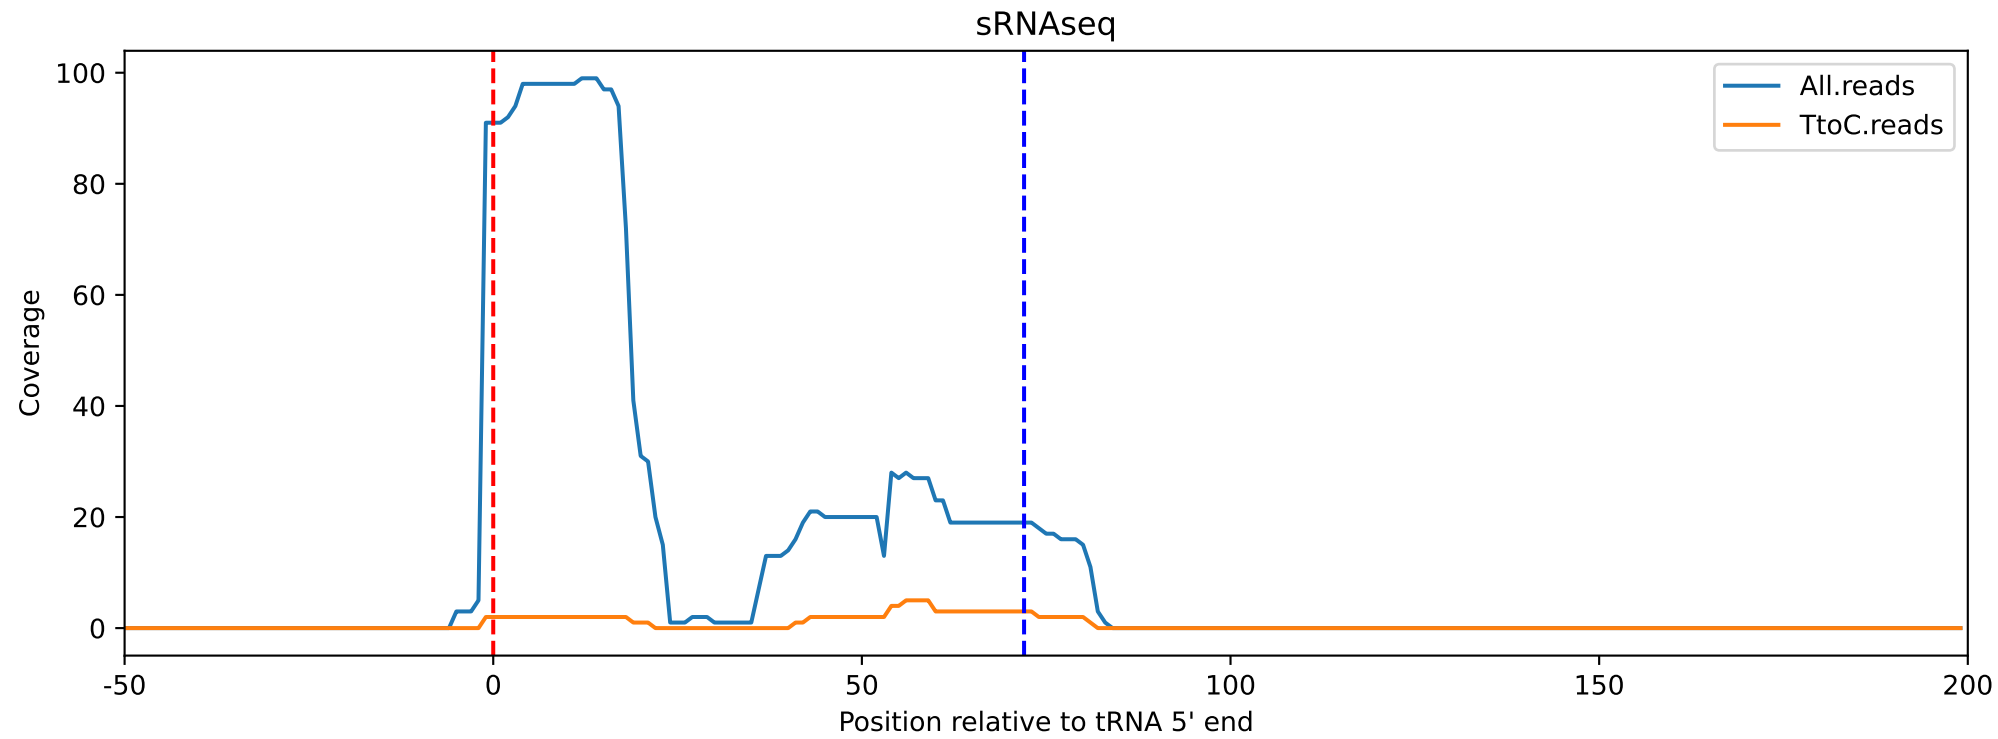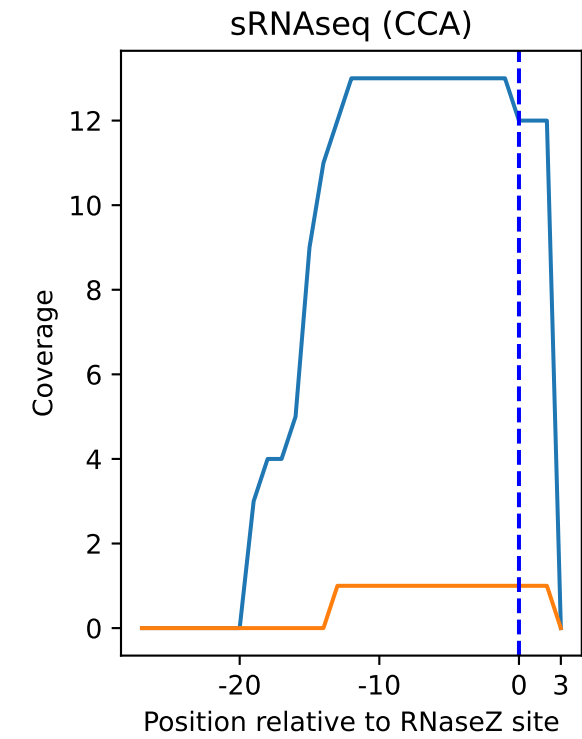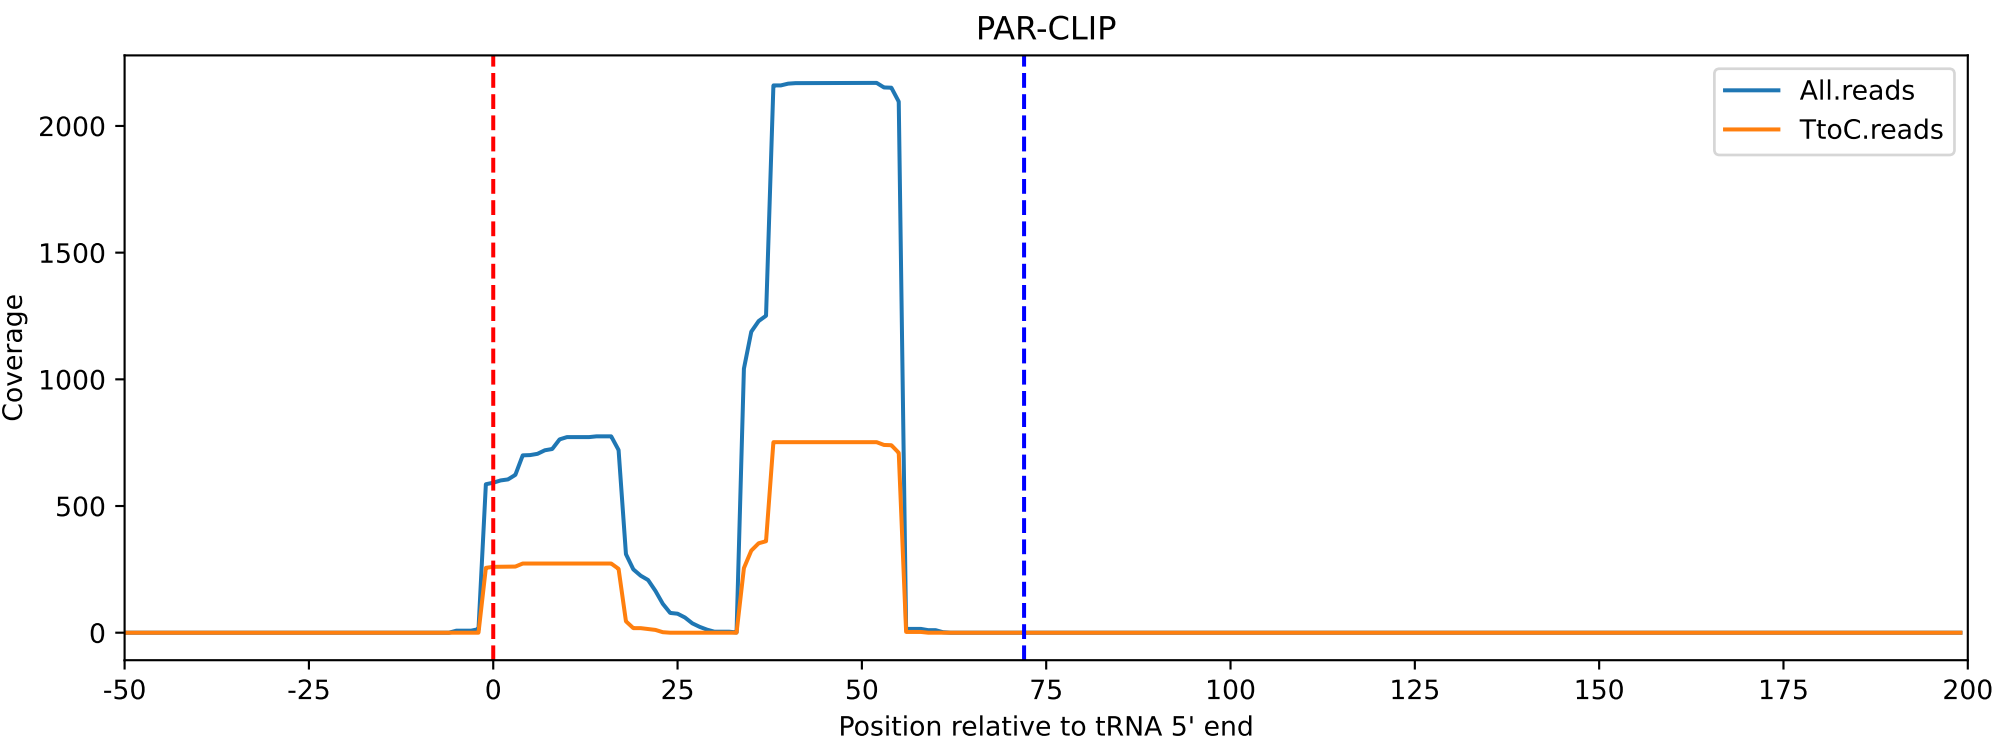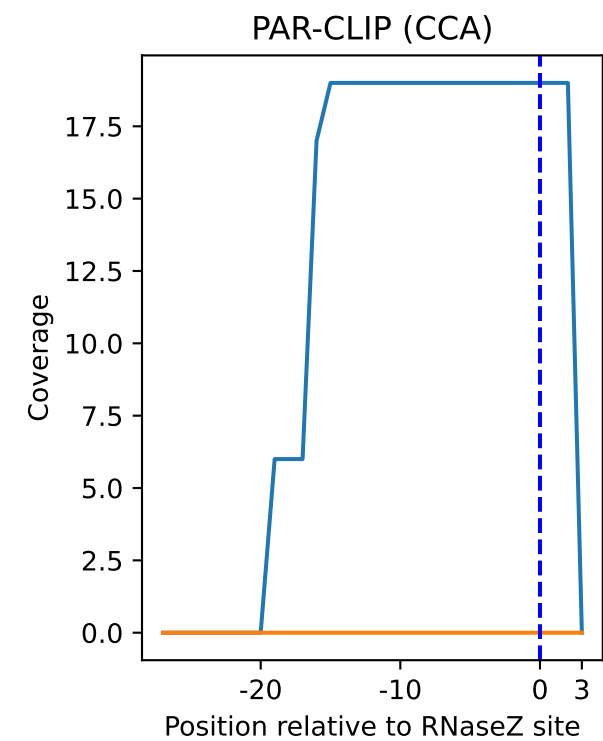

# tRNA-Ser-GCT-2-1

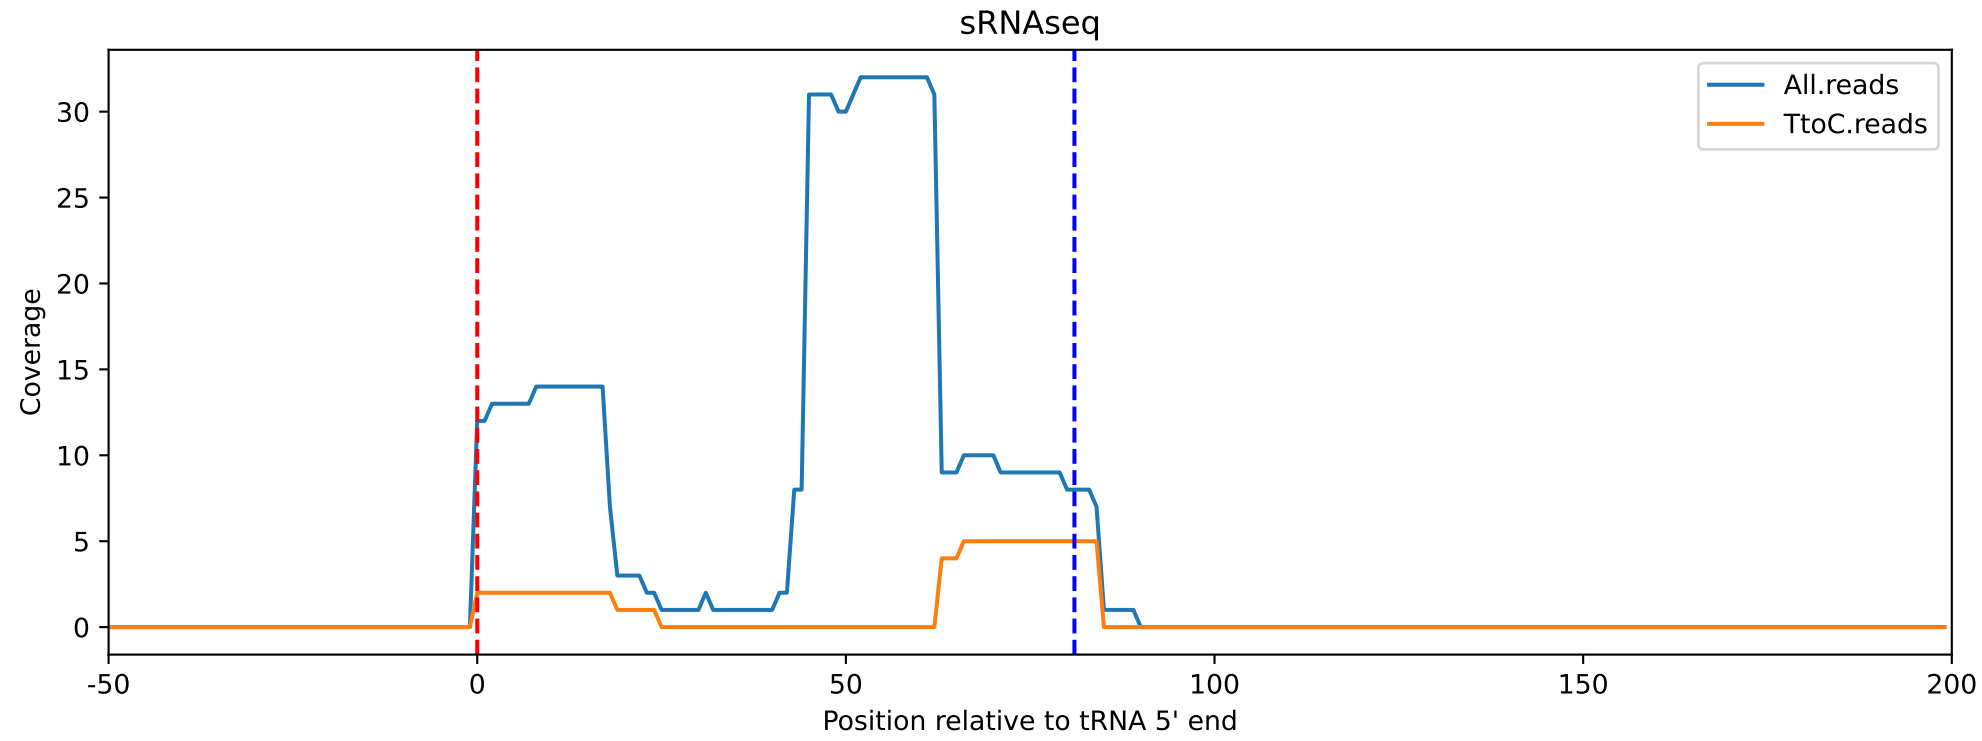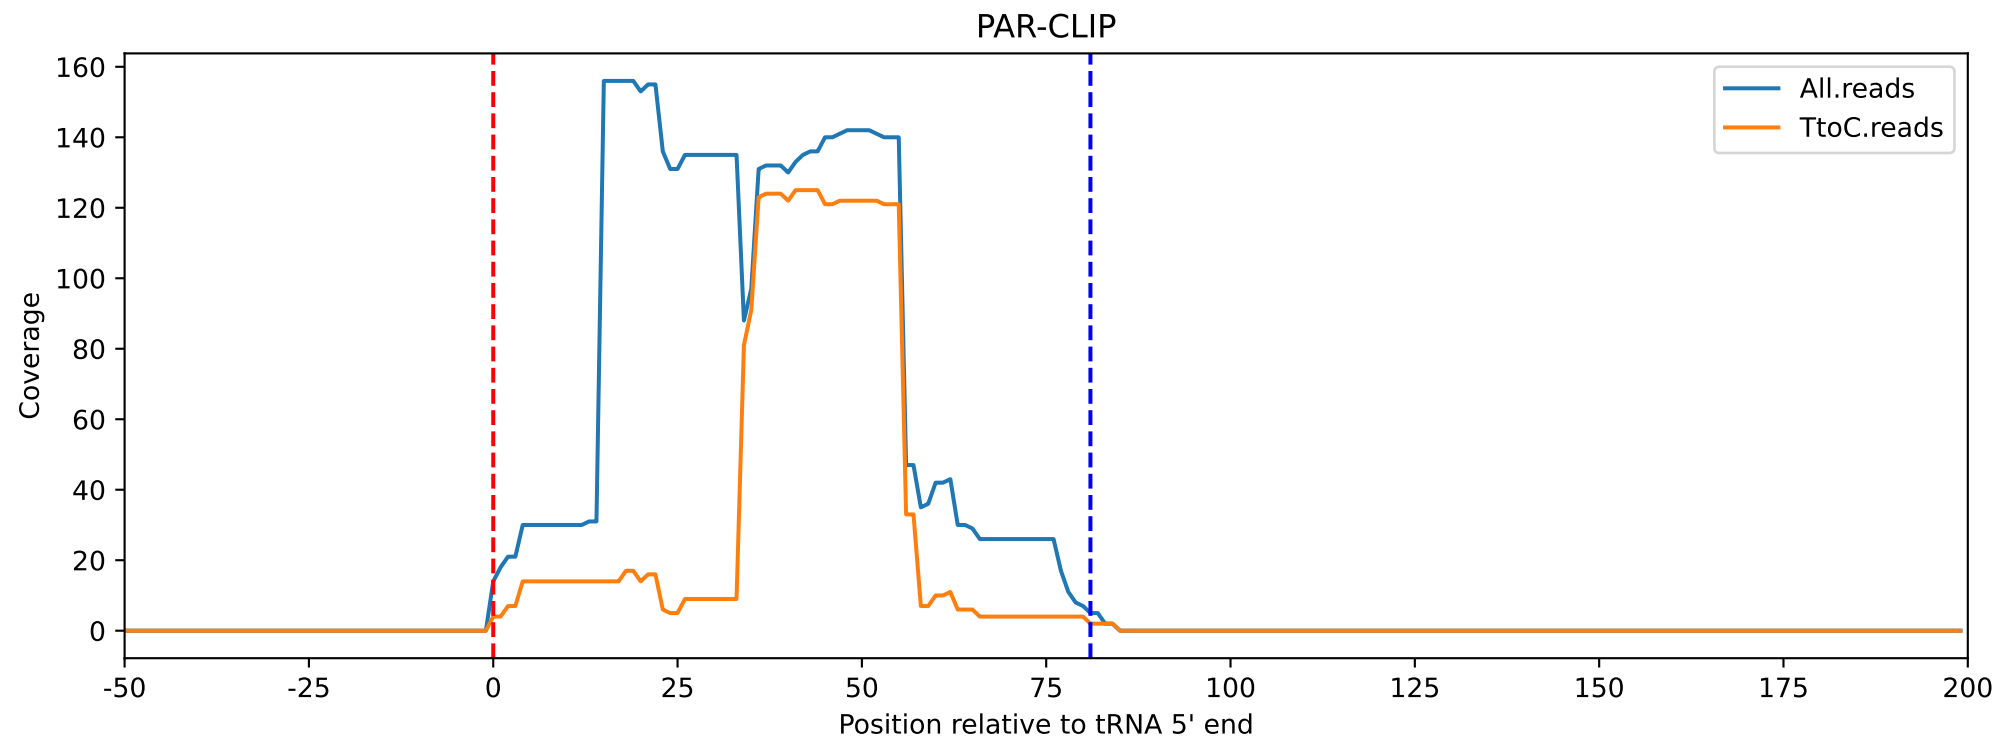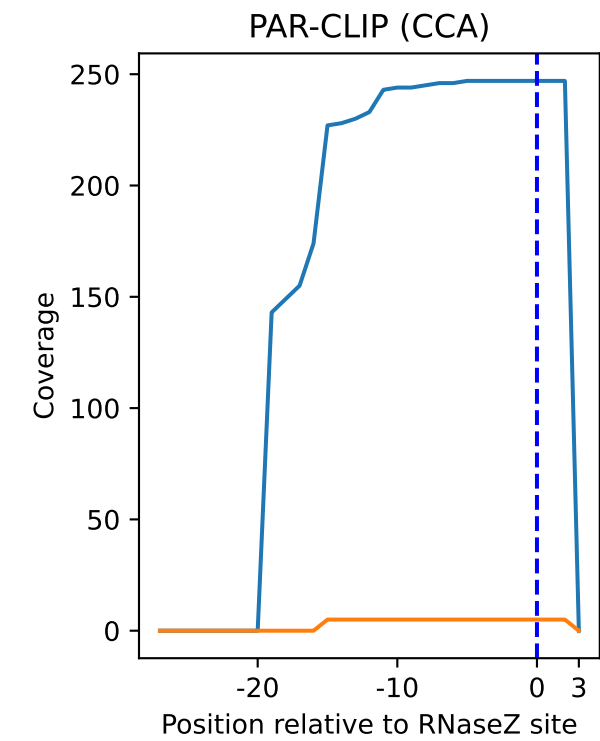

# tRNA-Leu-CAA-2-3

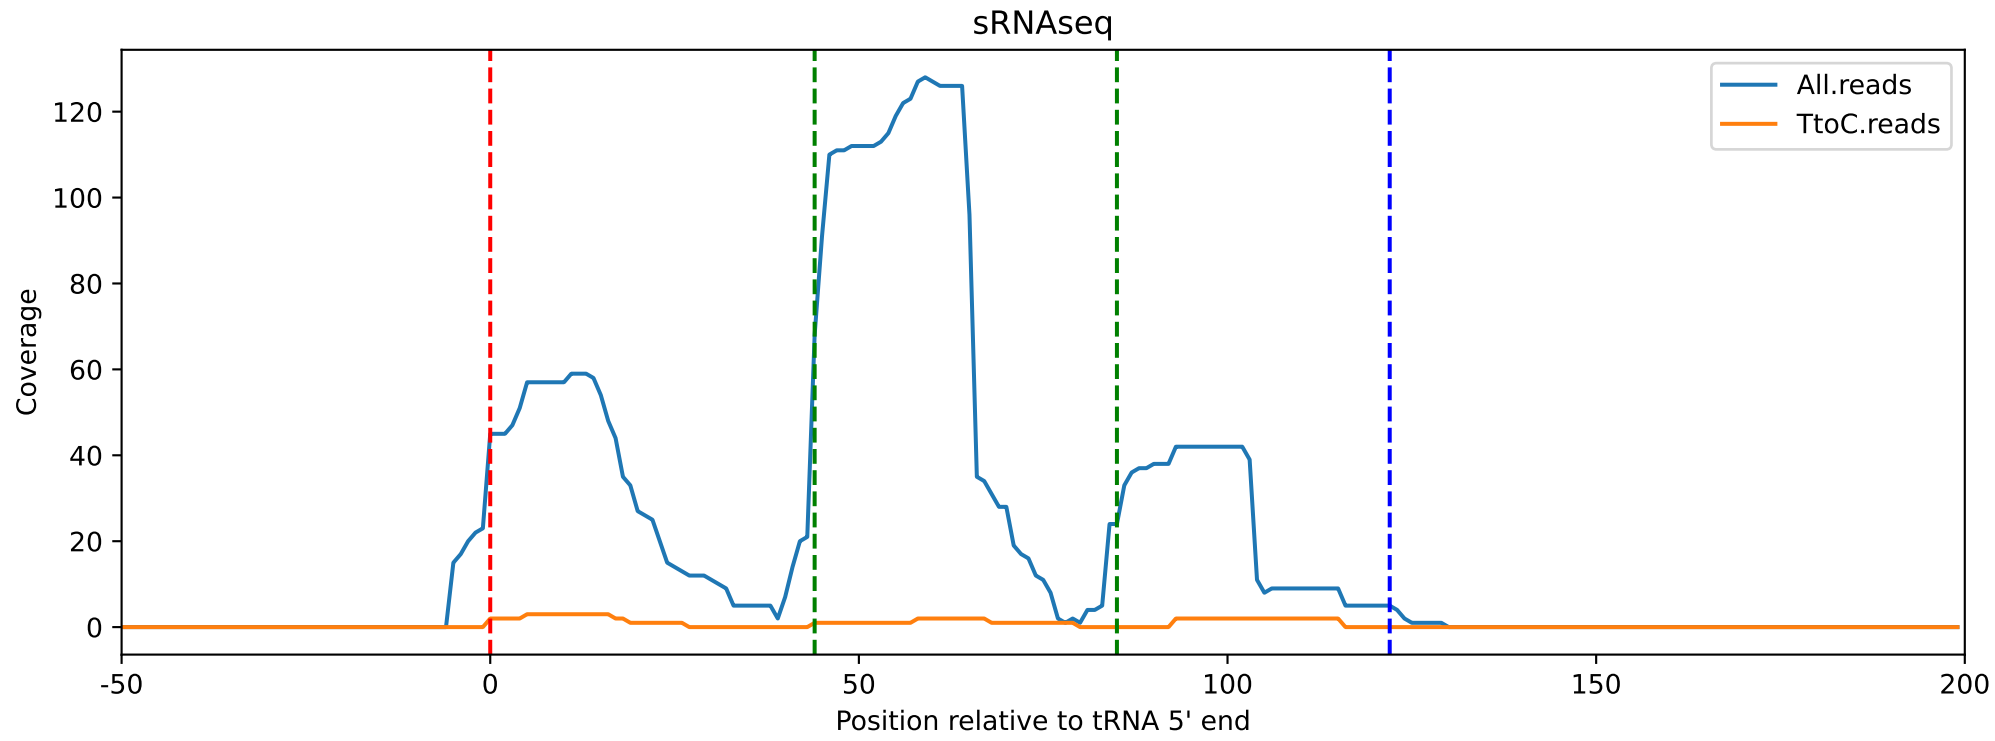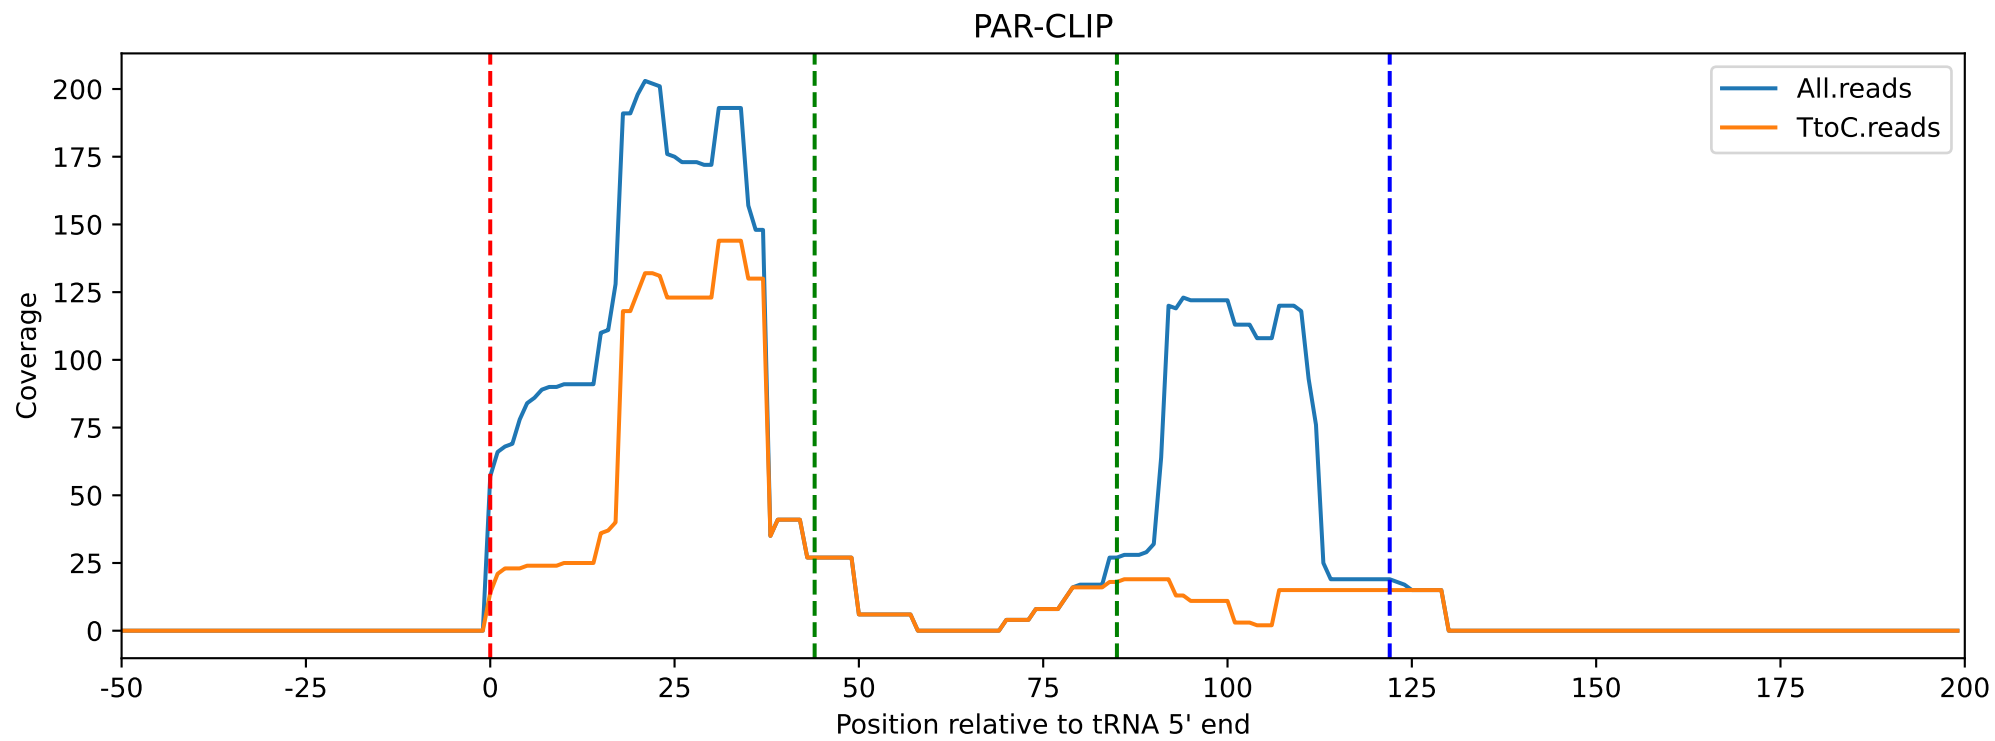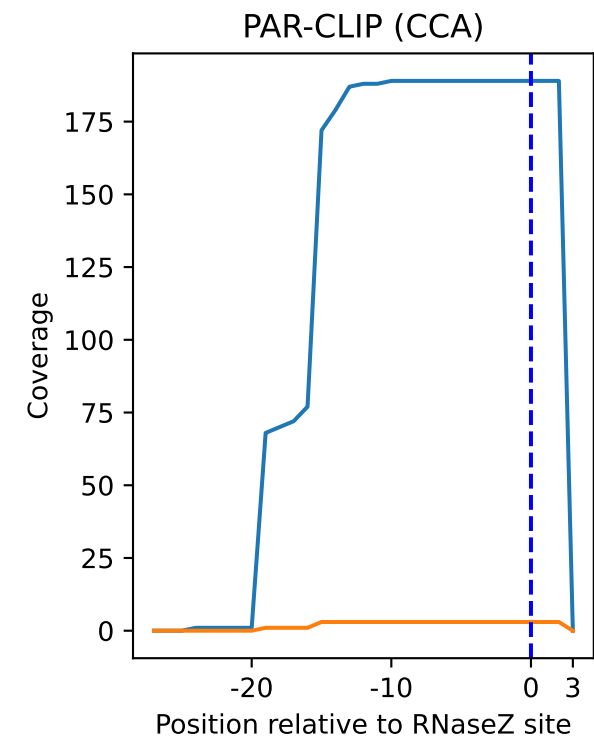



# tRNA-Gln-CTG-2-5

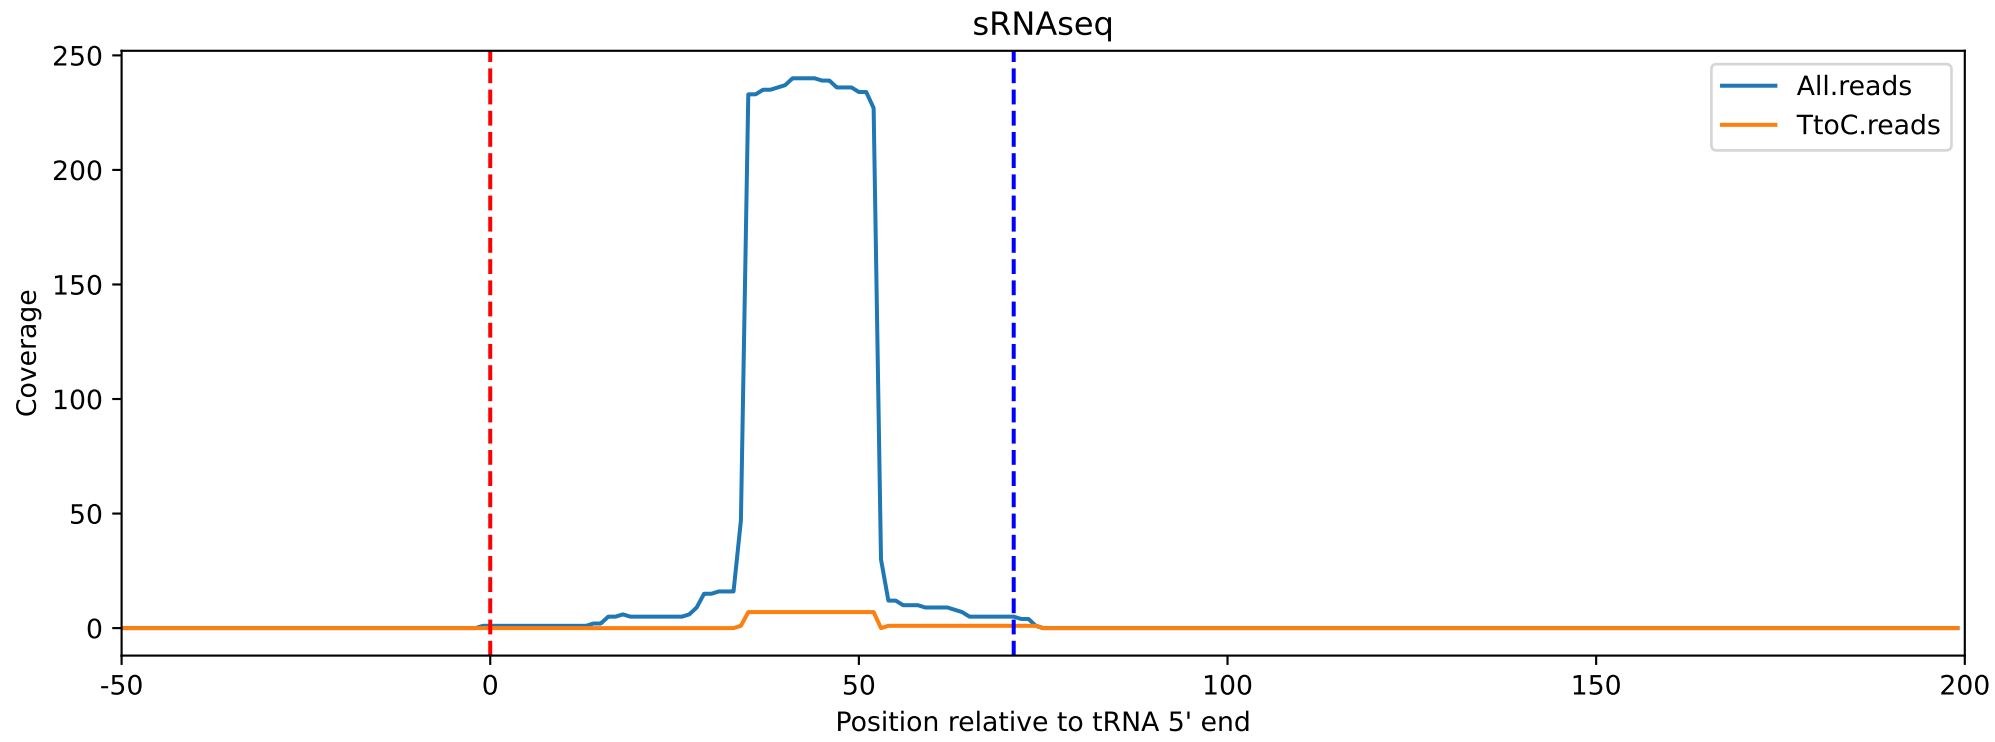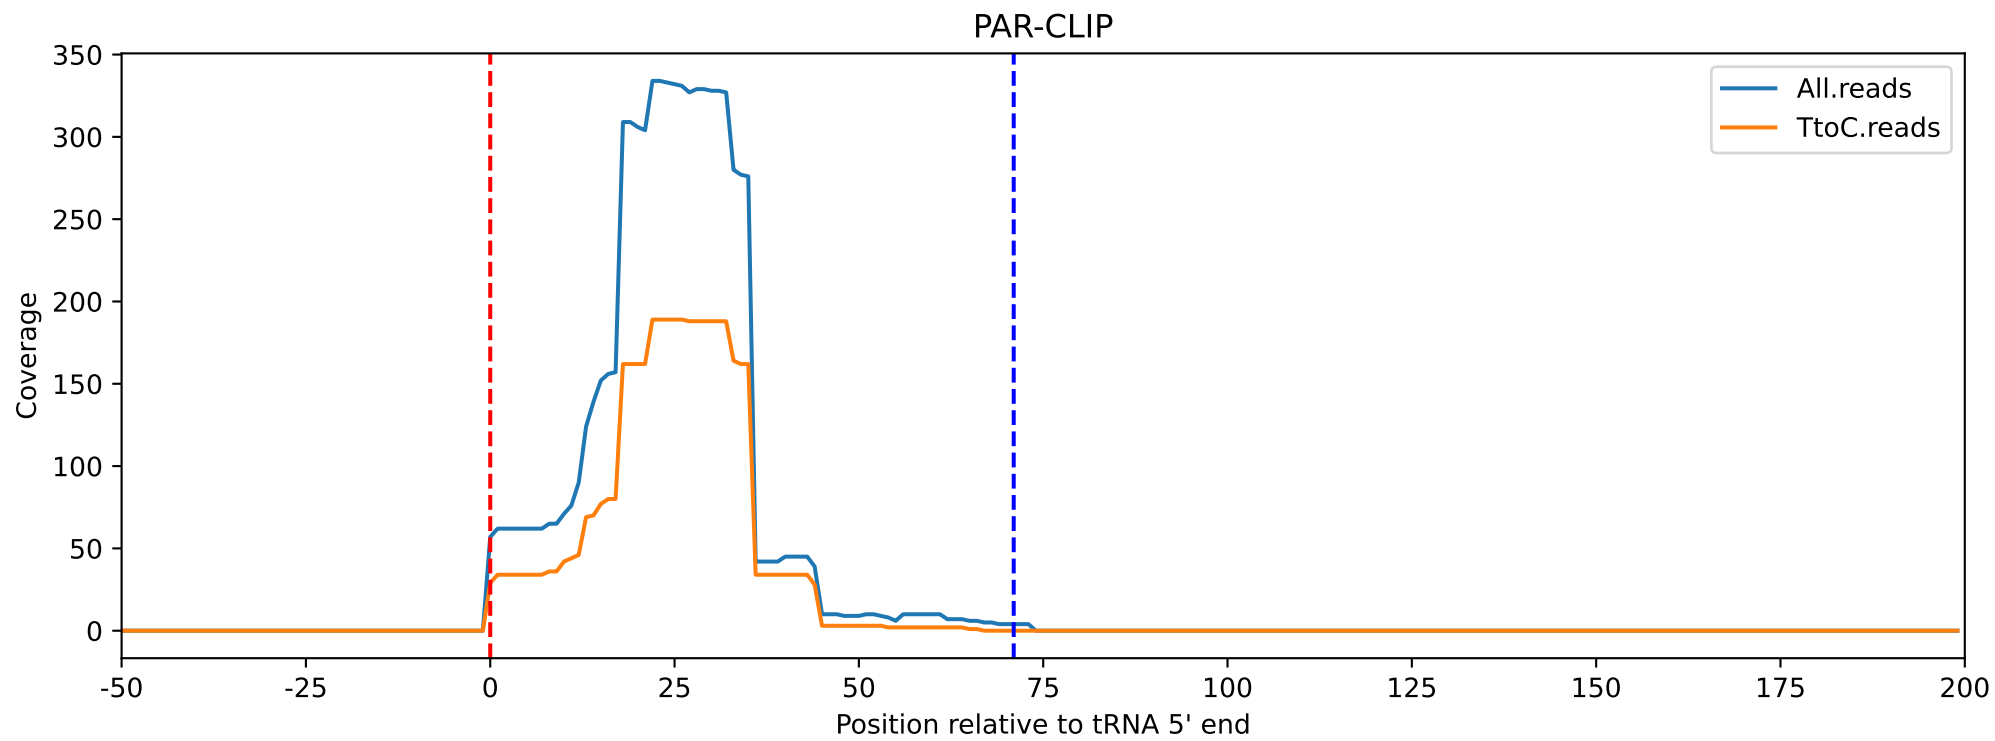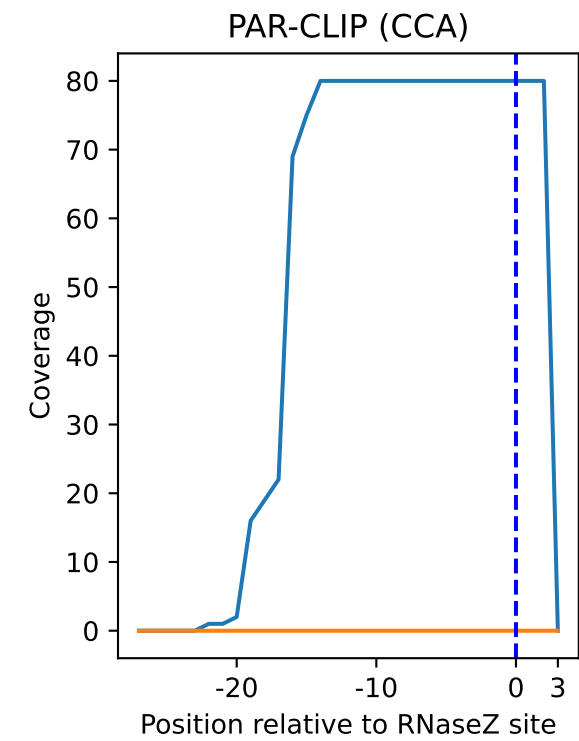

# tRNA-Asp-GTC-1-3

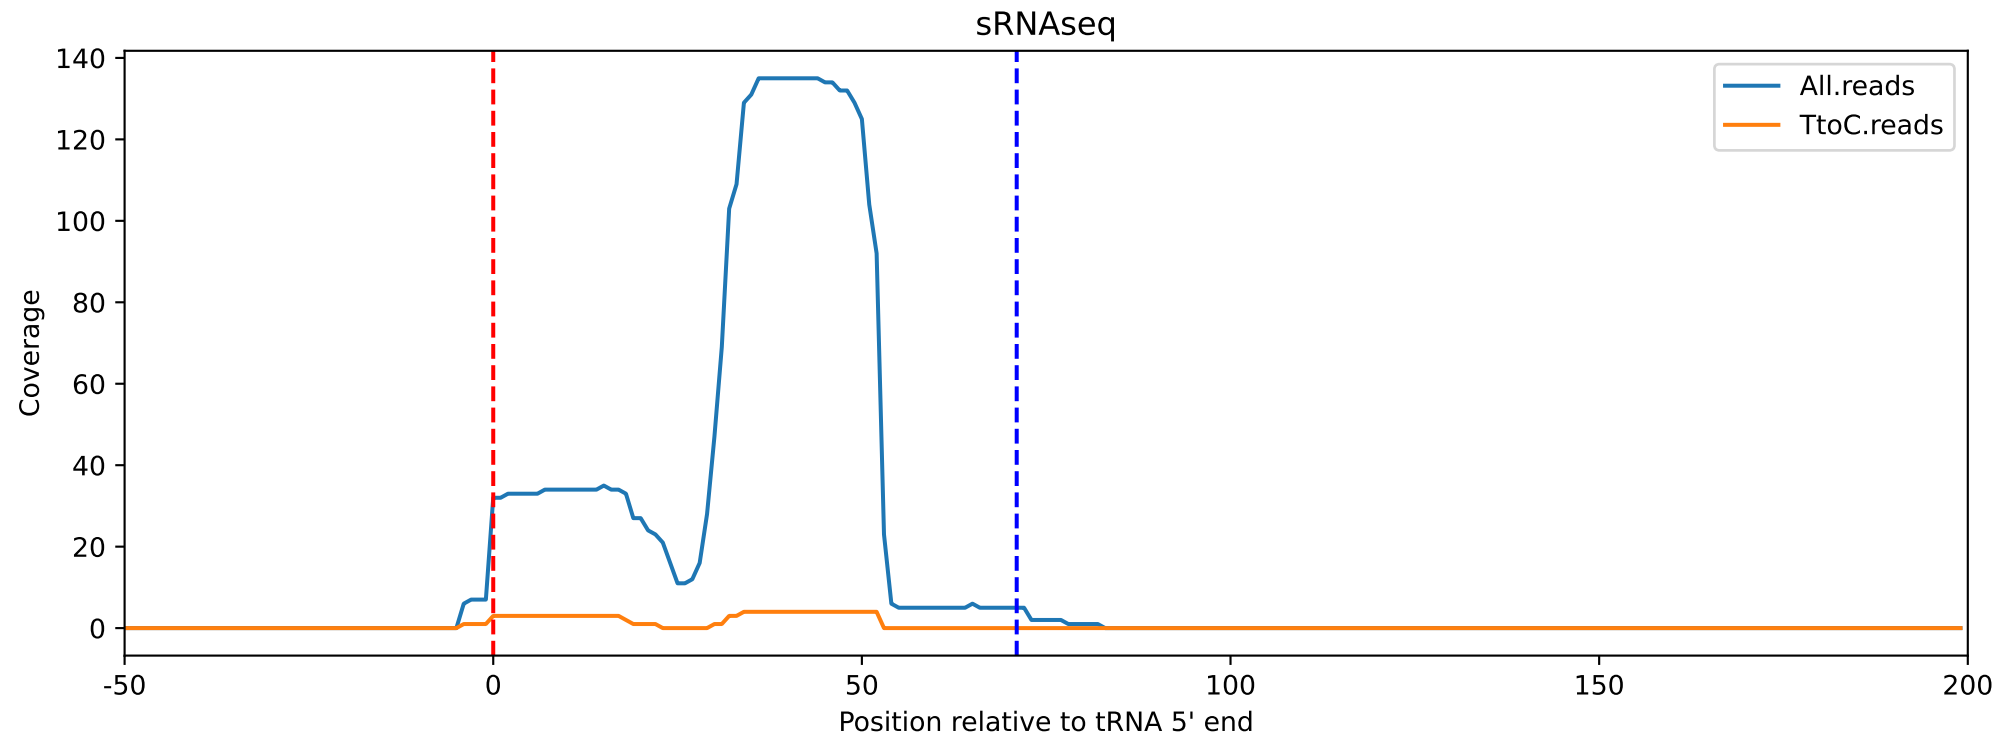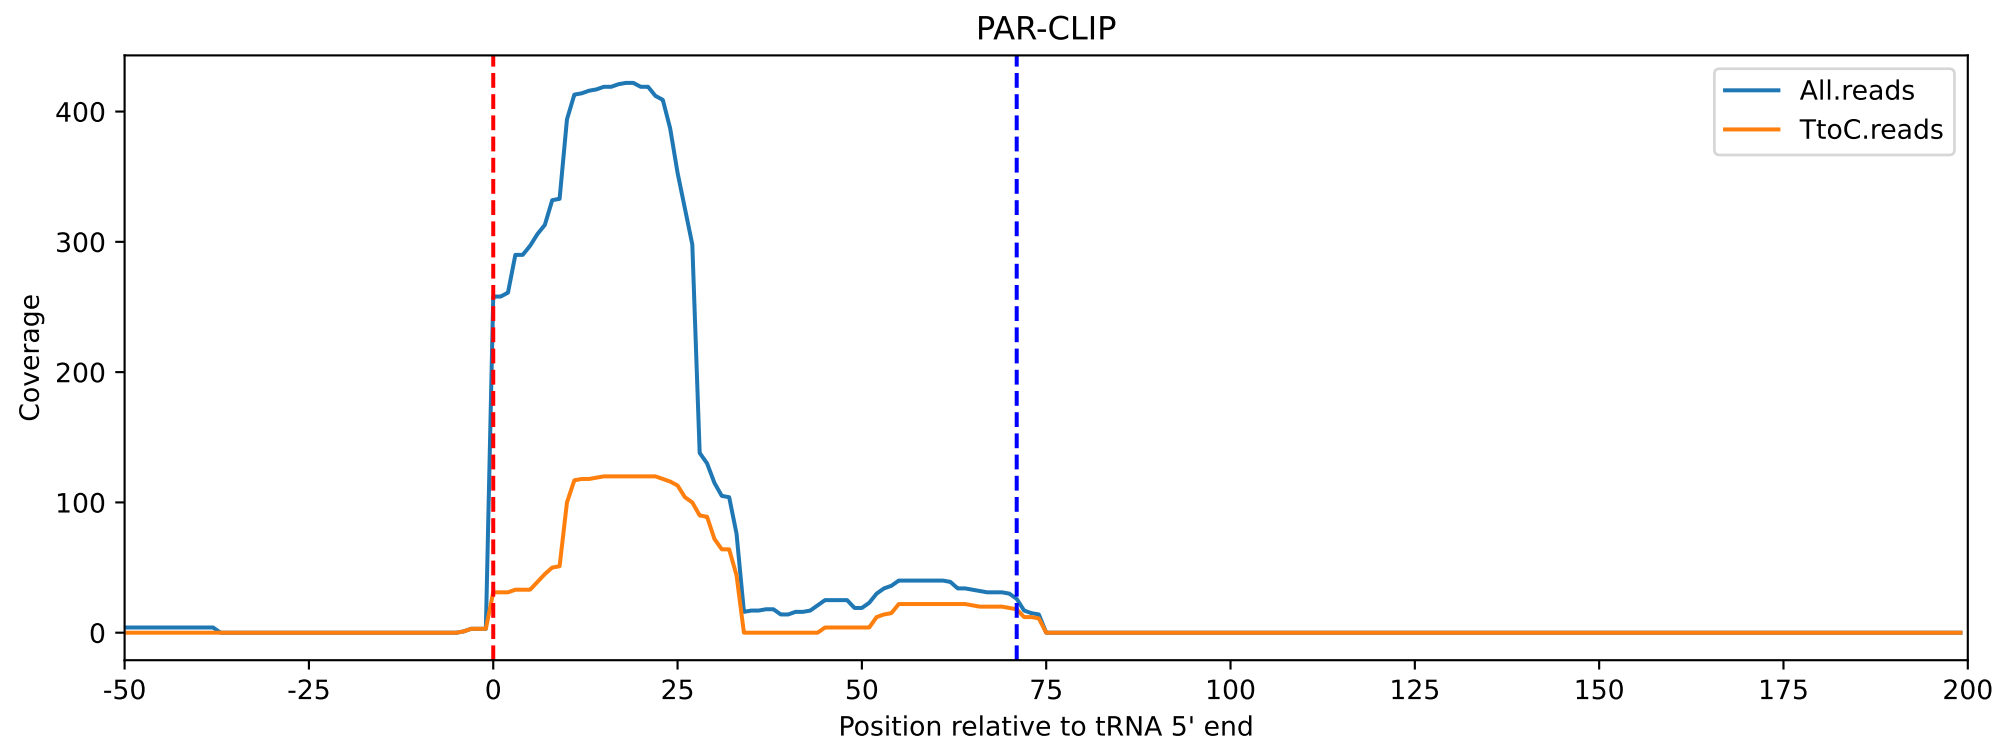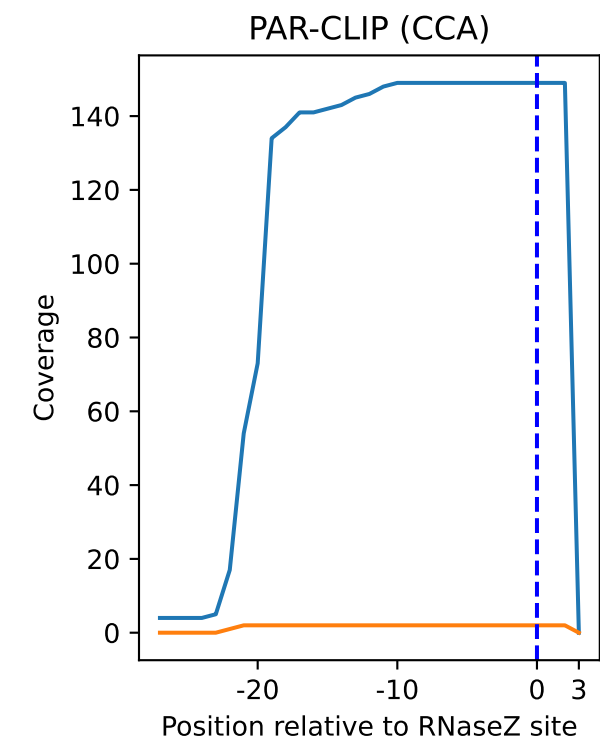

# tRNA-Gly-TCC-1-4

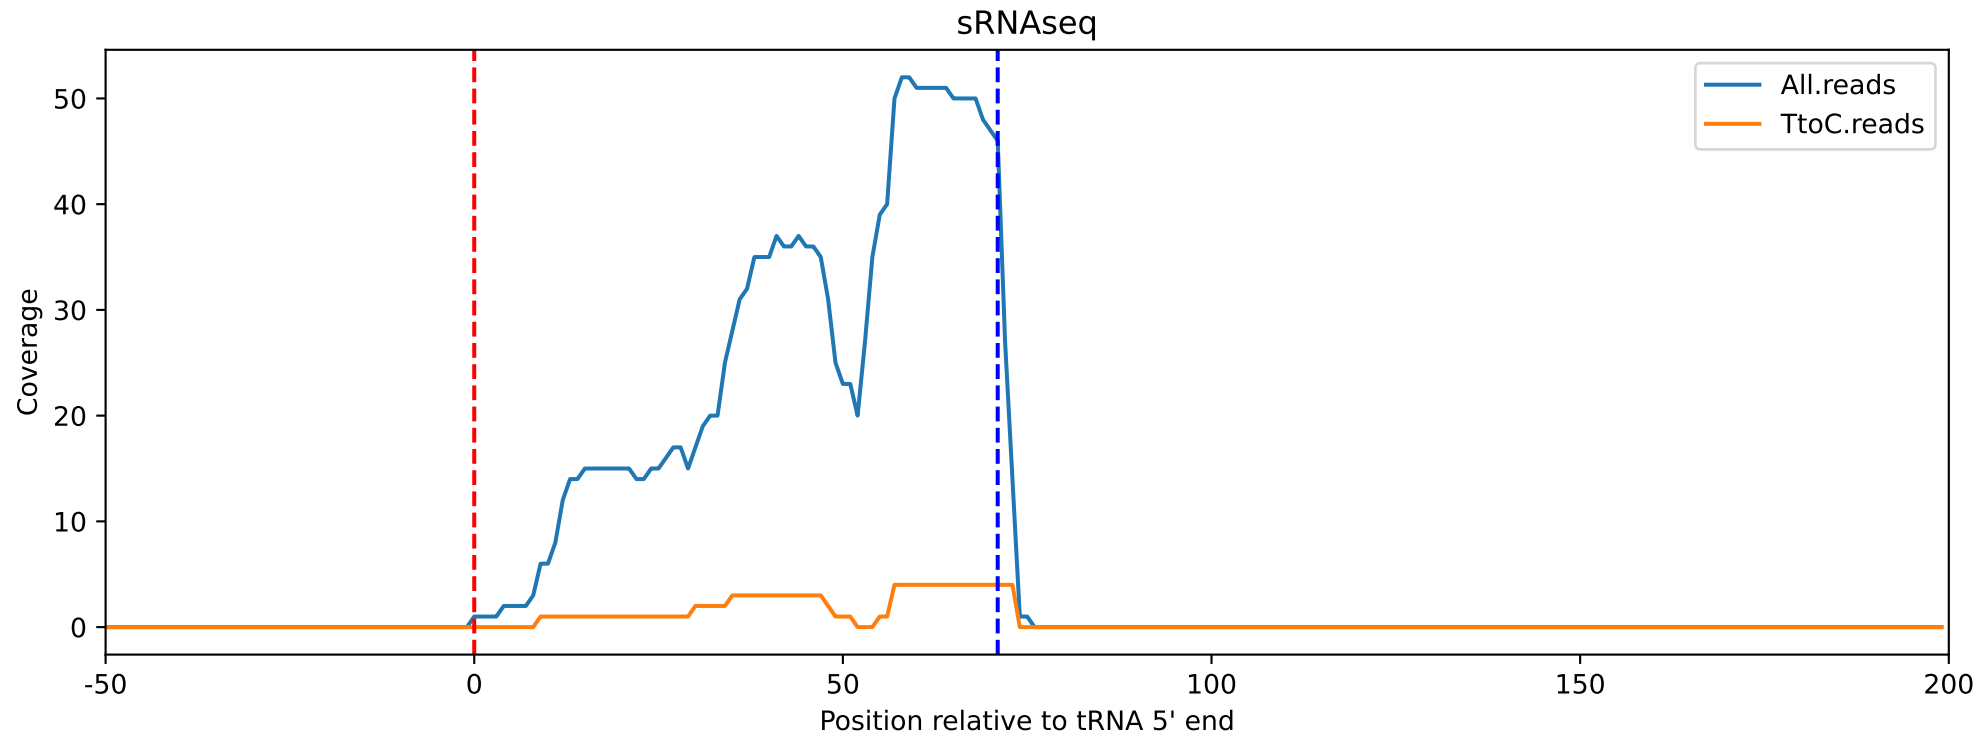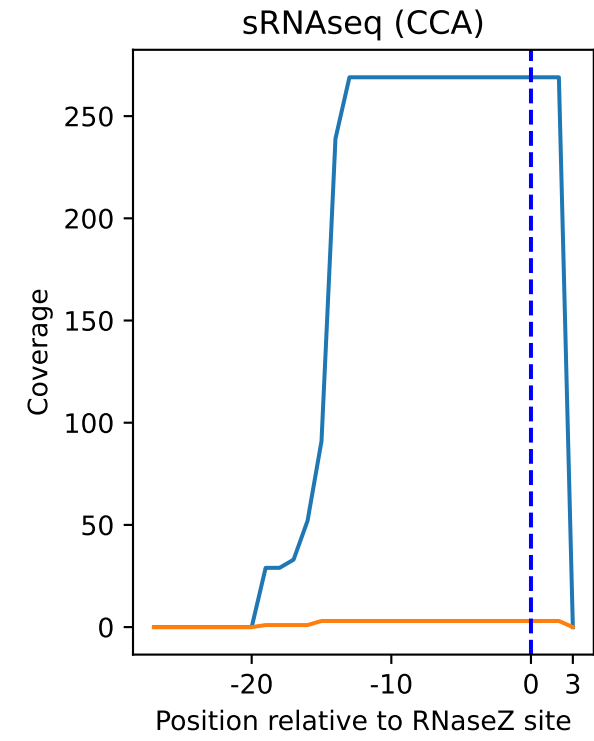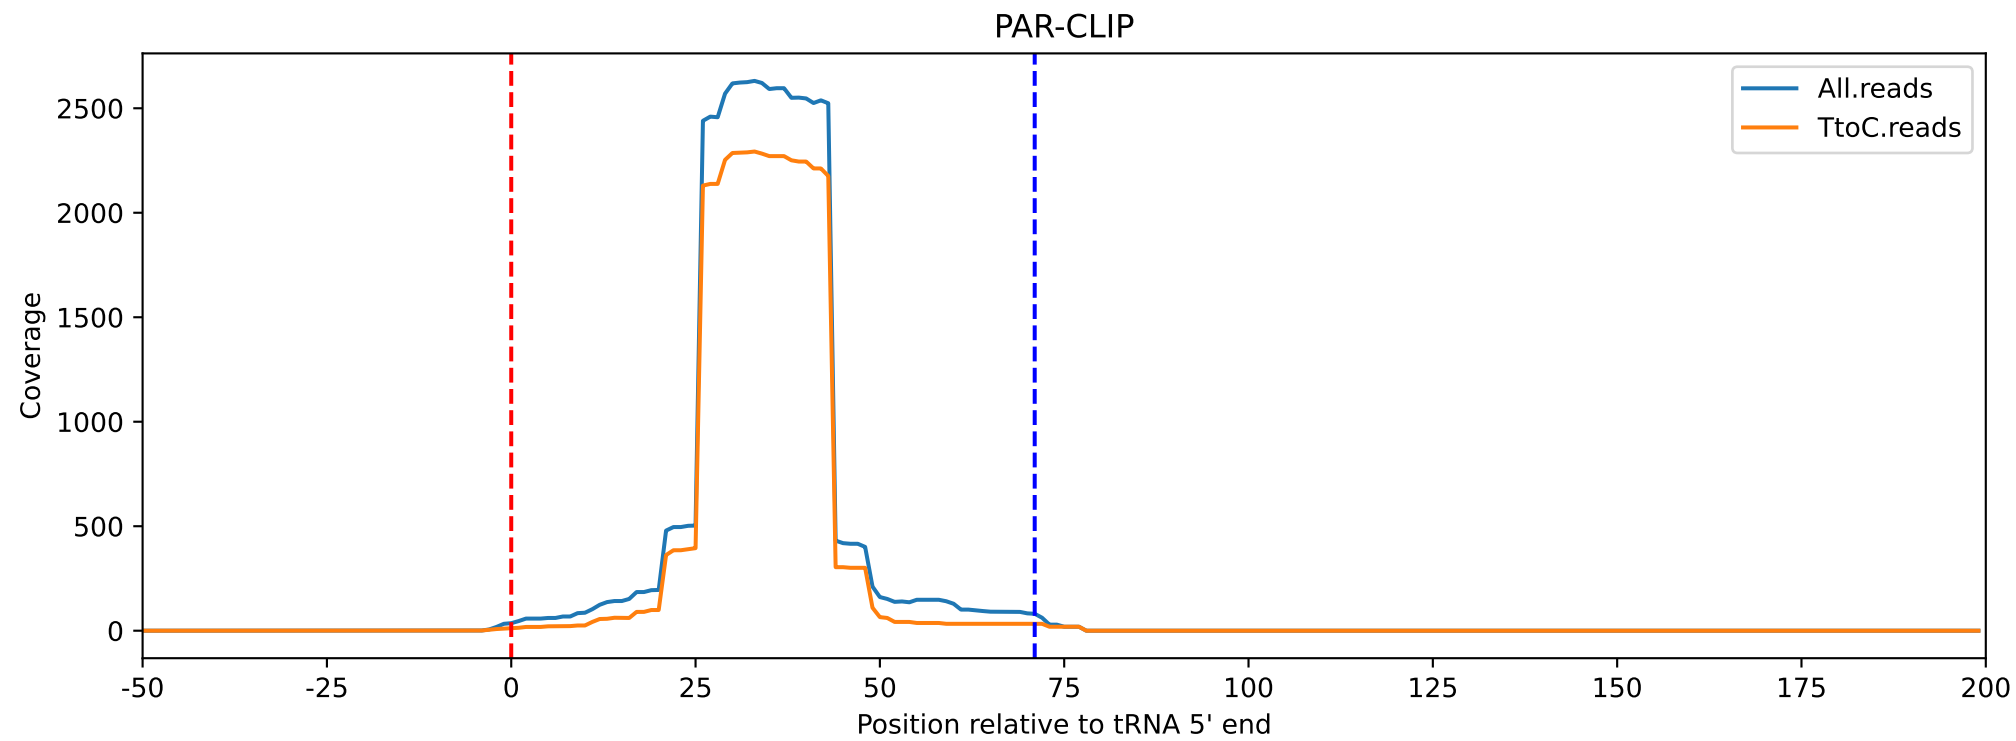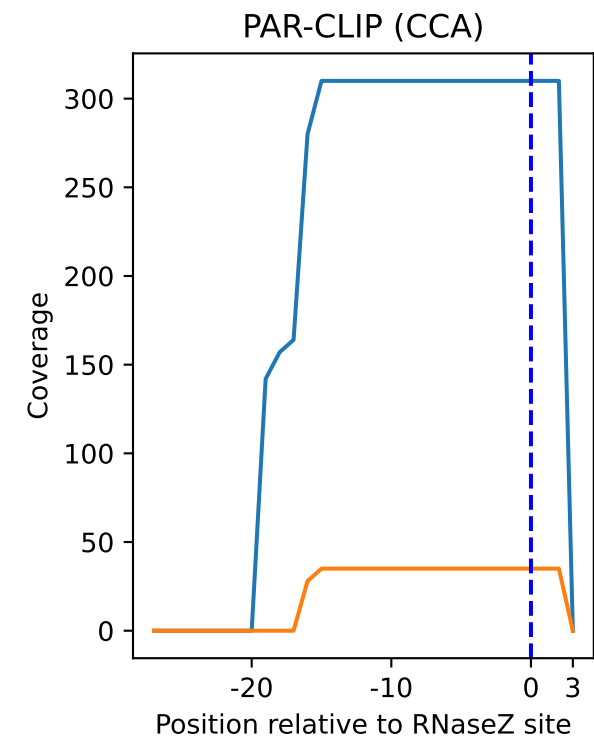

# tRNA-Leu-TAA-3-1

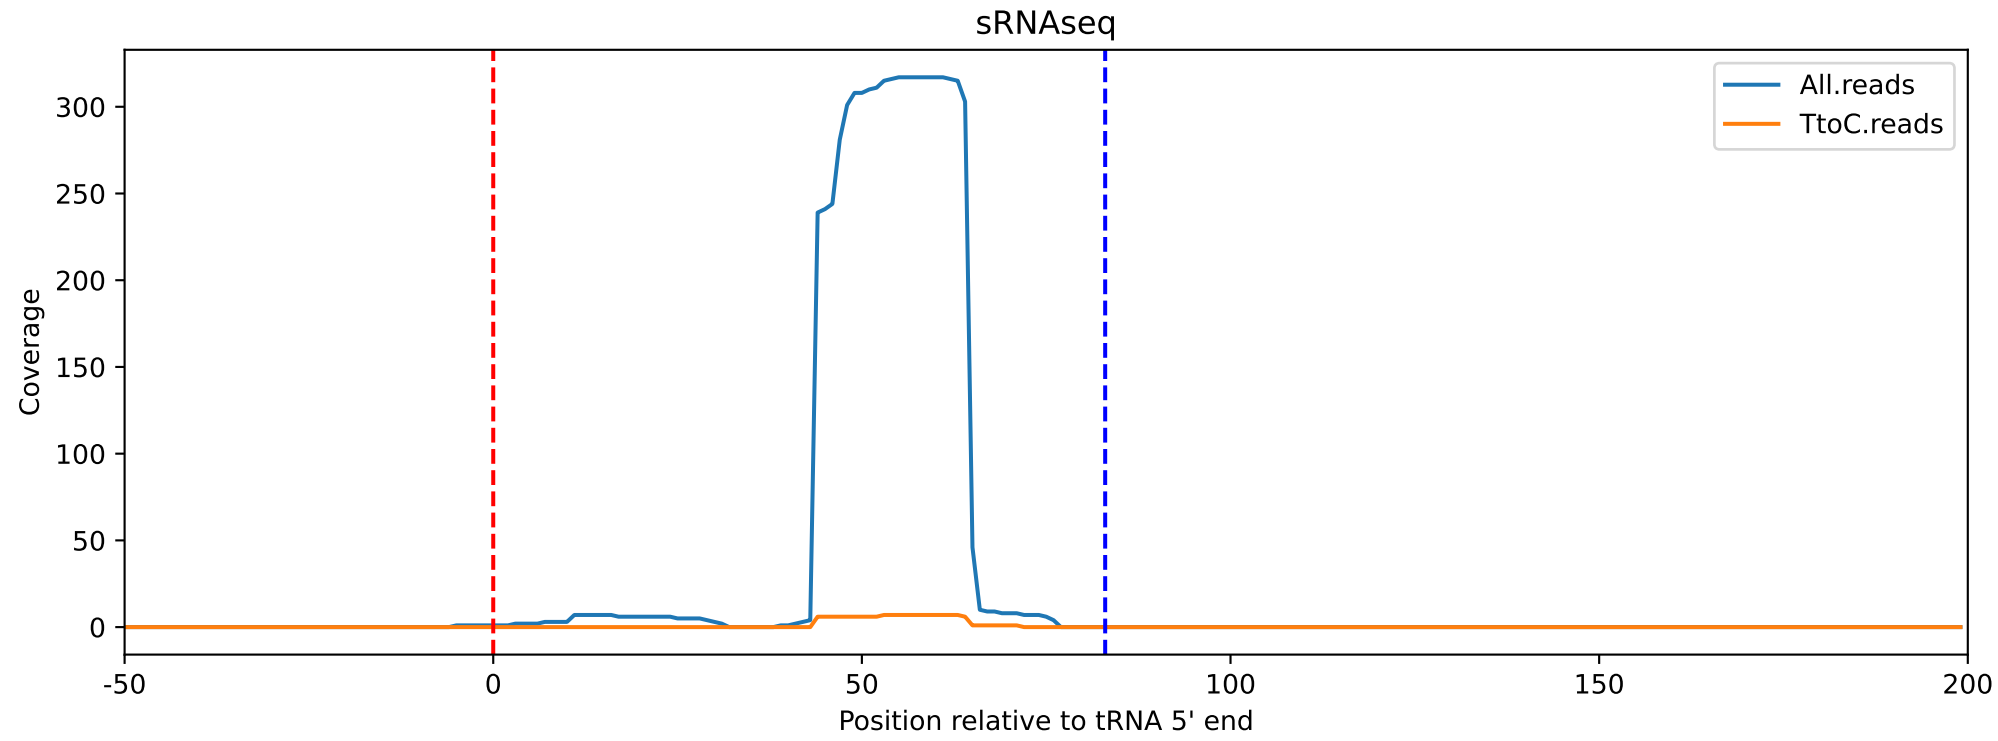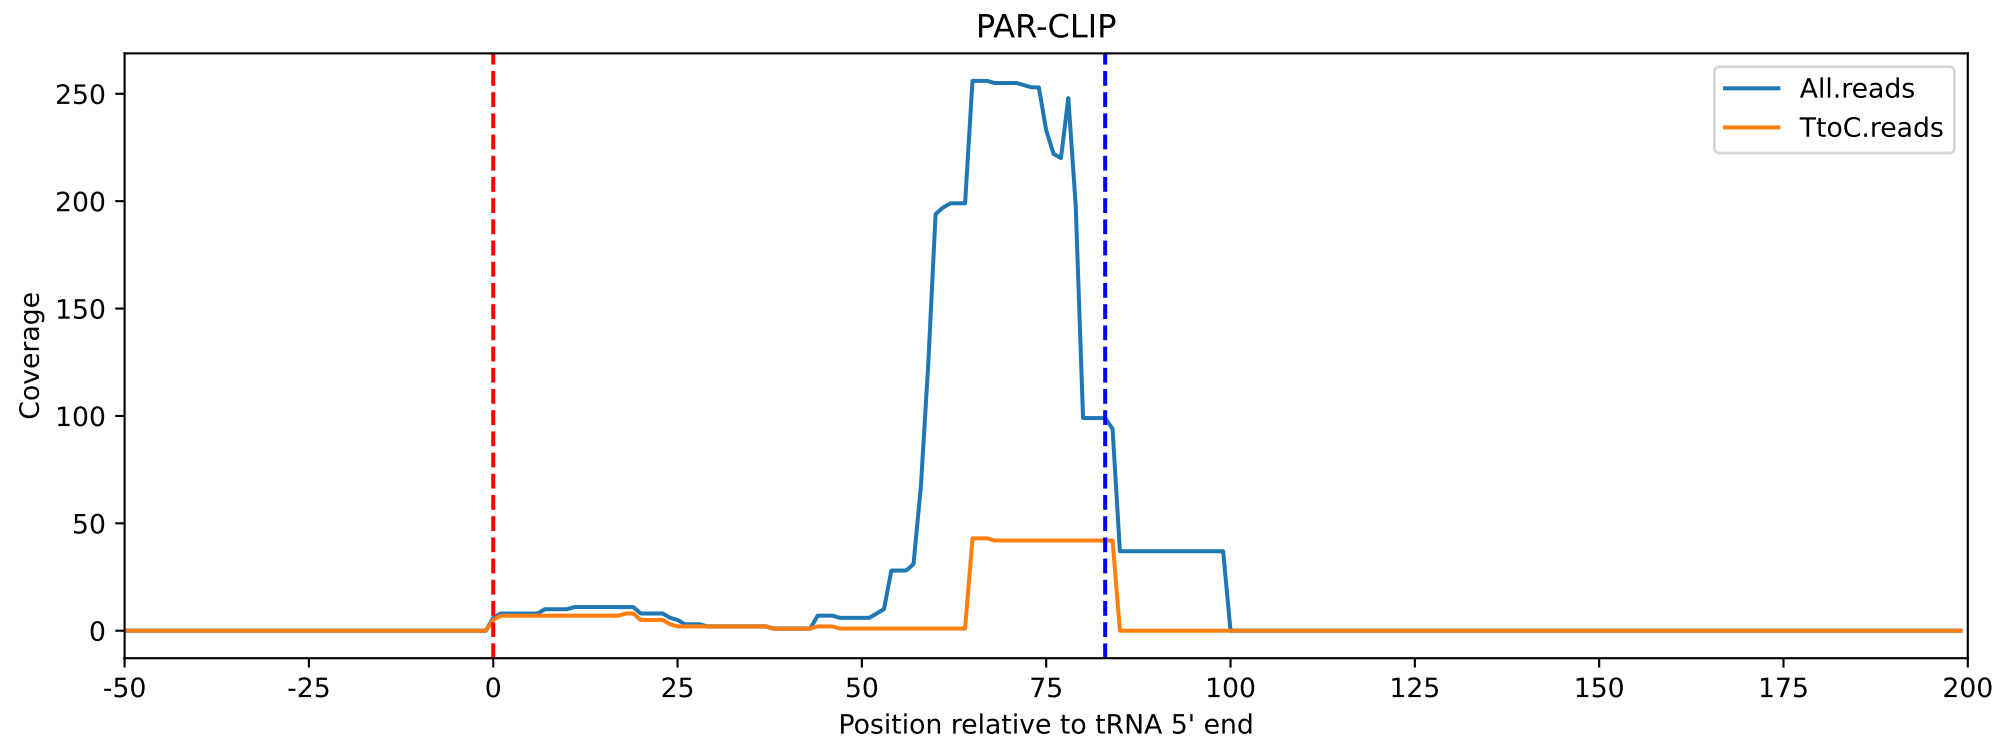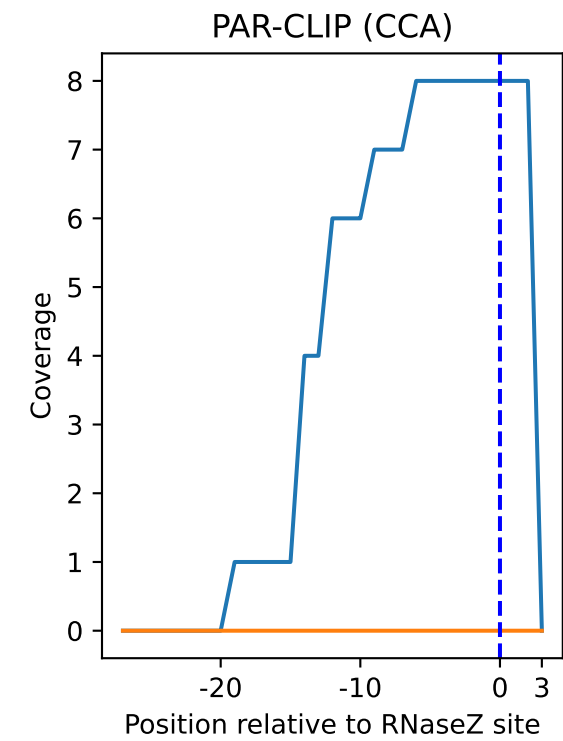

# tRNA-Thr-AGT-1-5

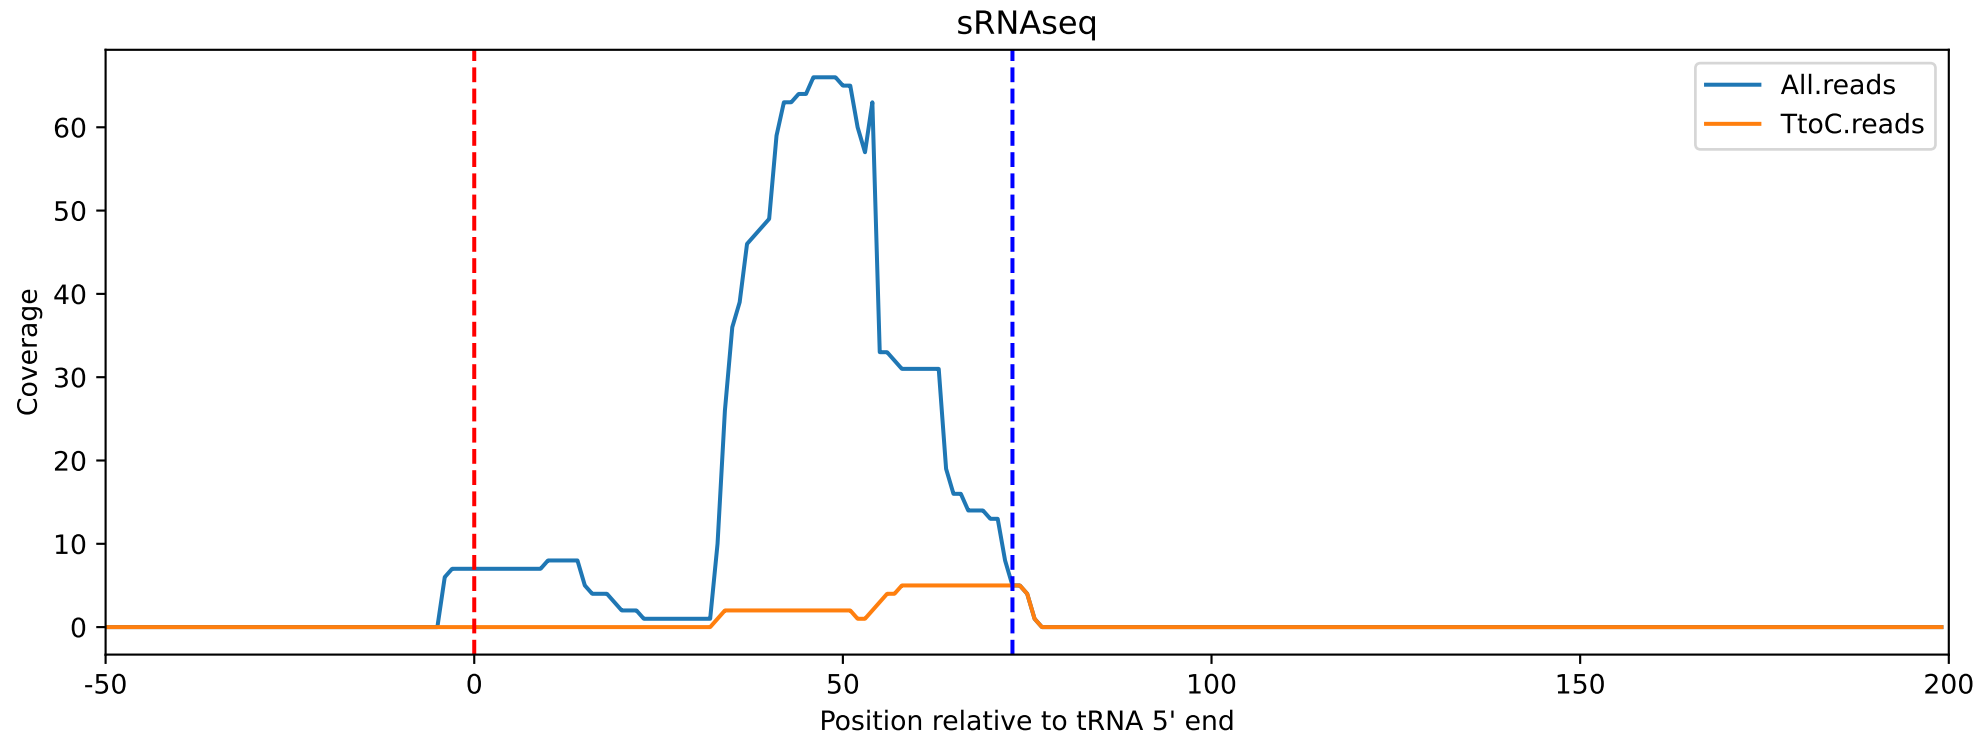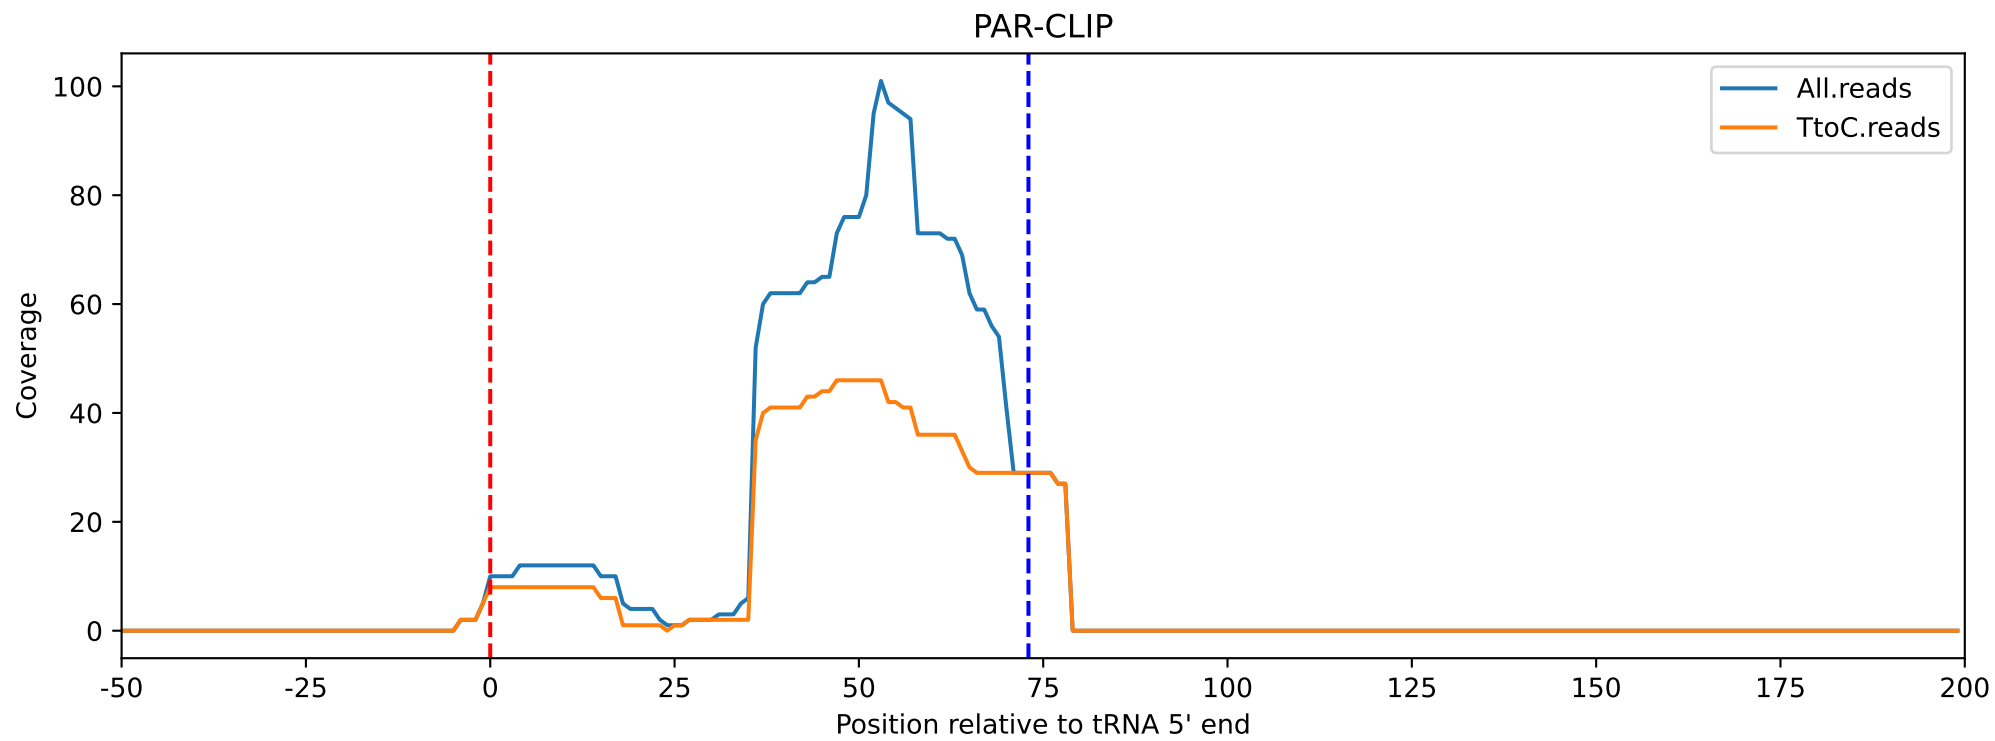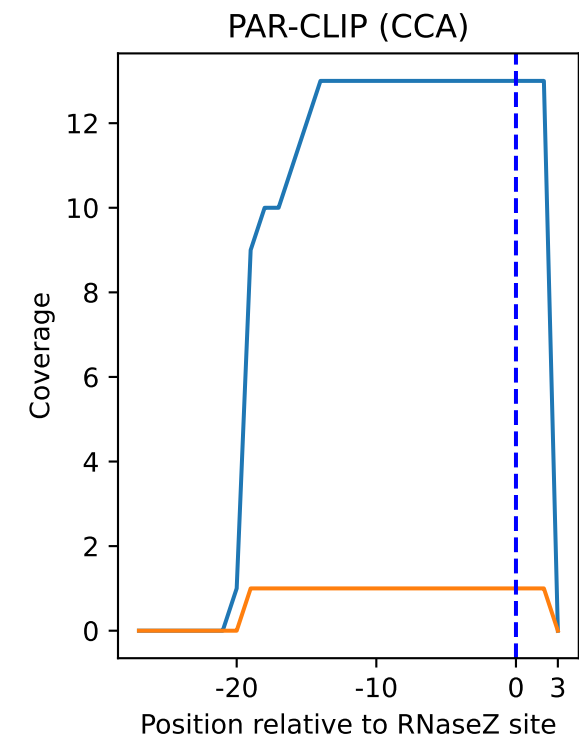

# tRNA-Lys-CTT-1-6

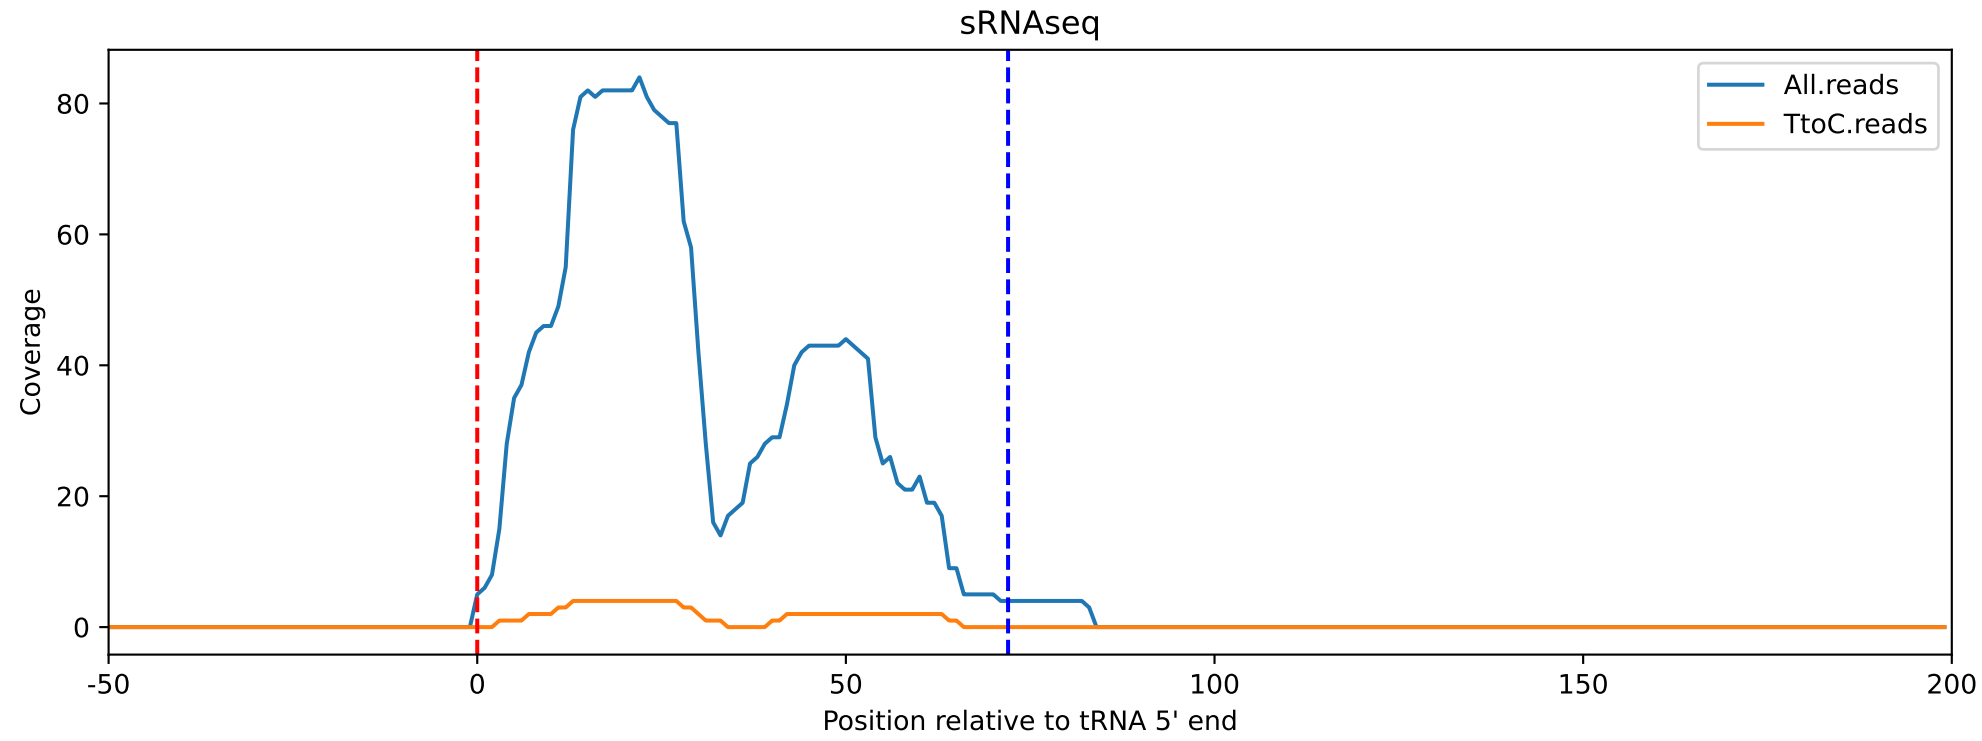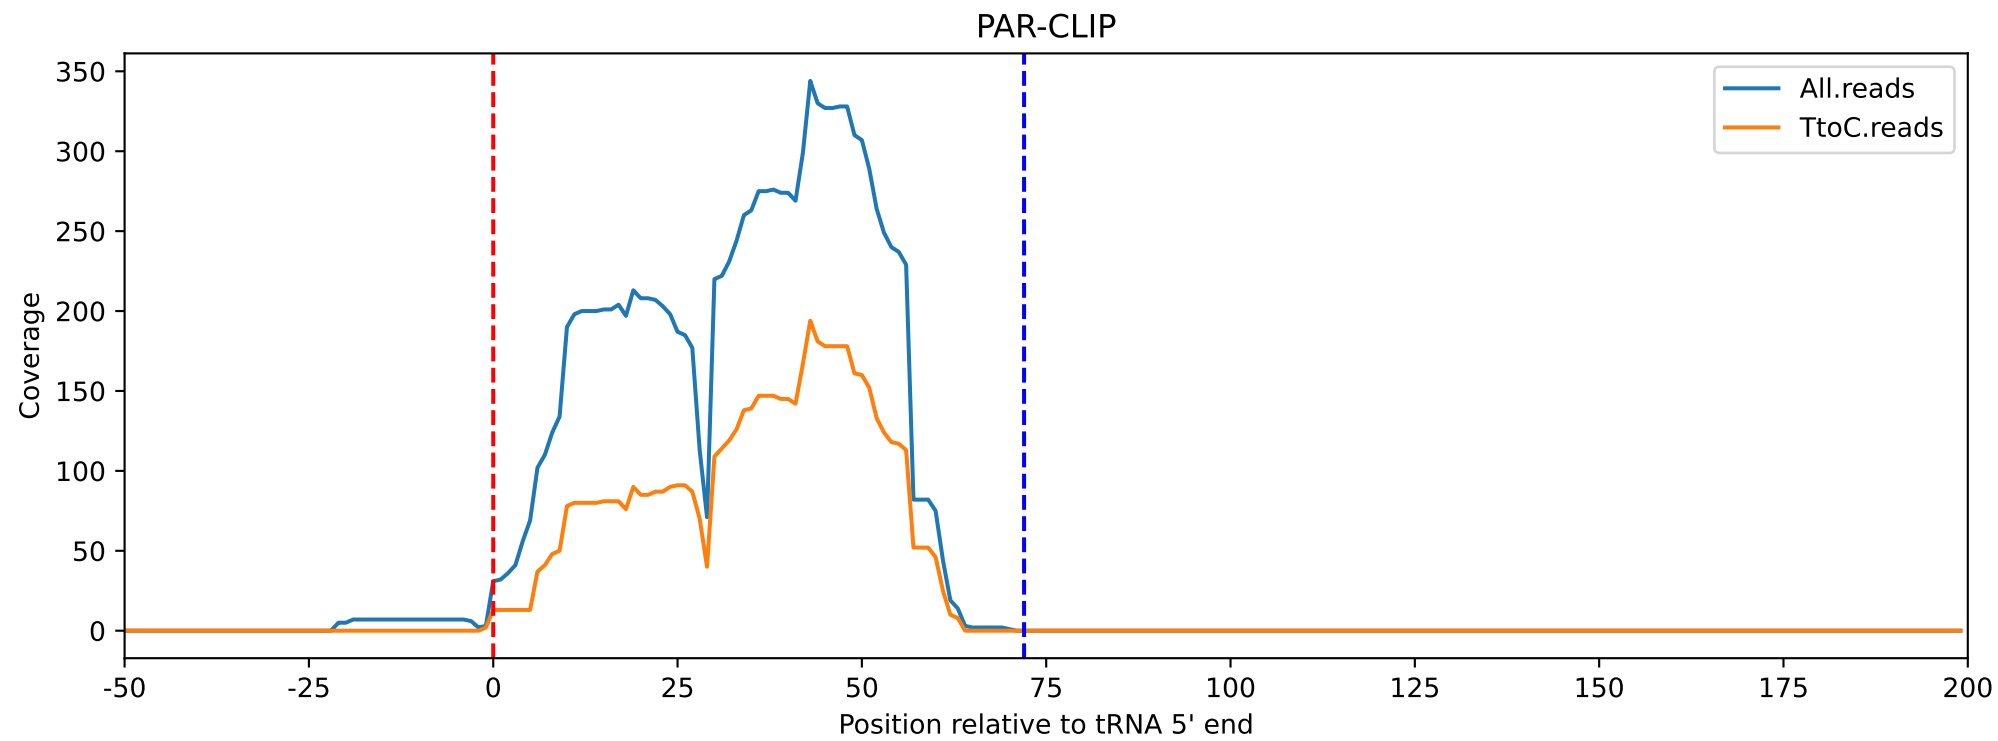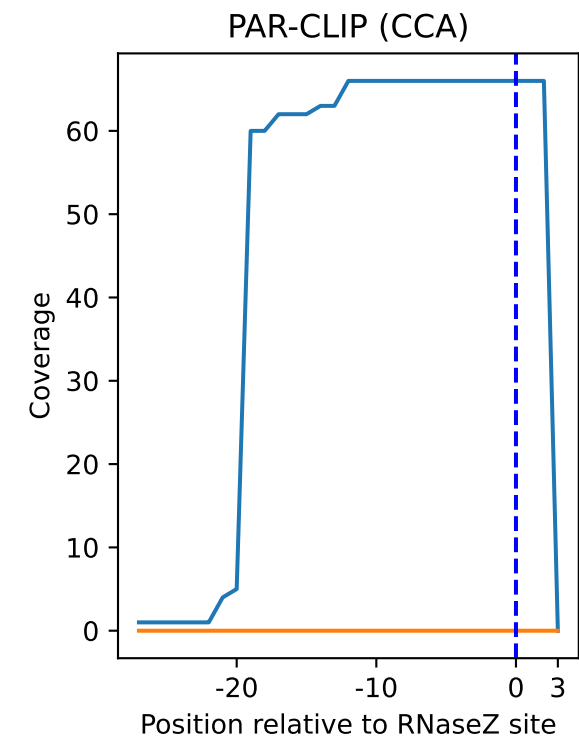

# tRNA-Cys-GCA-1-2

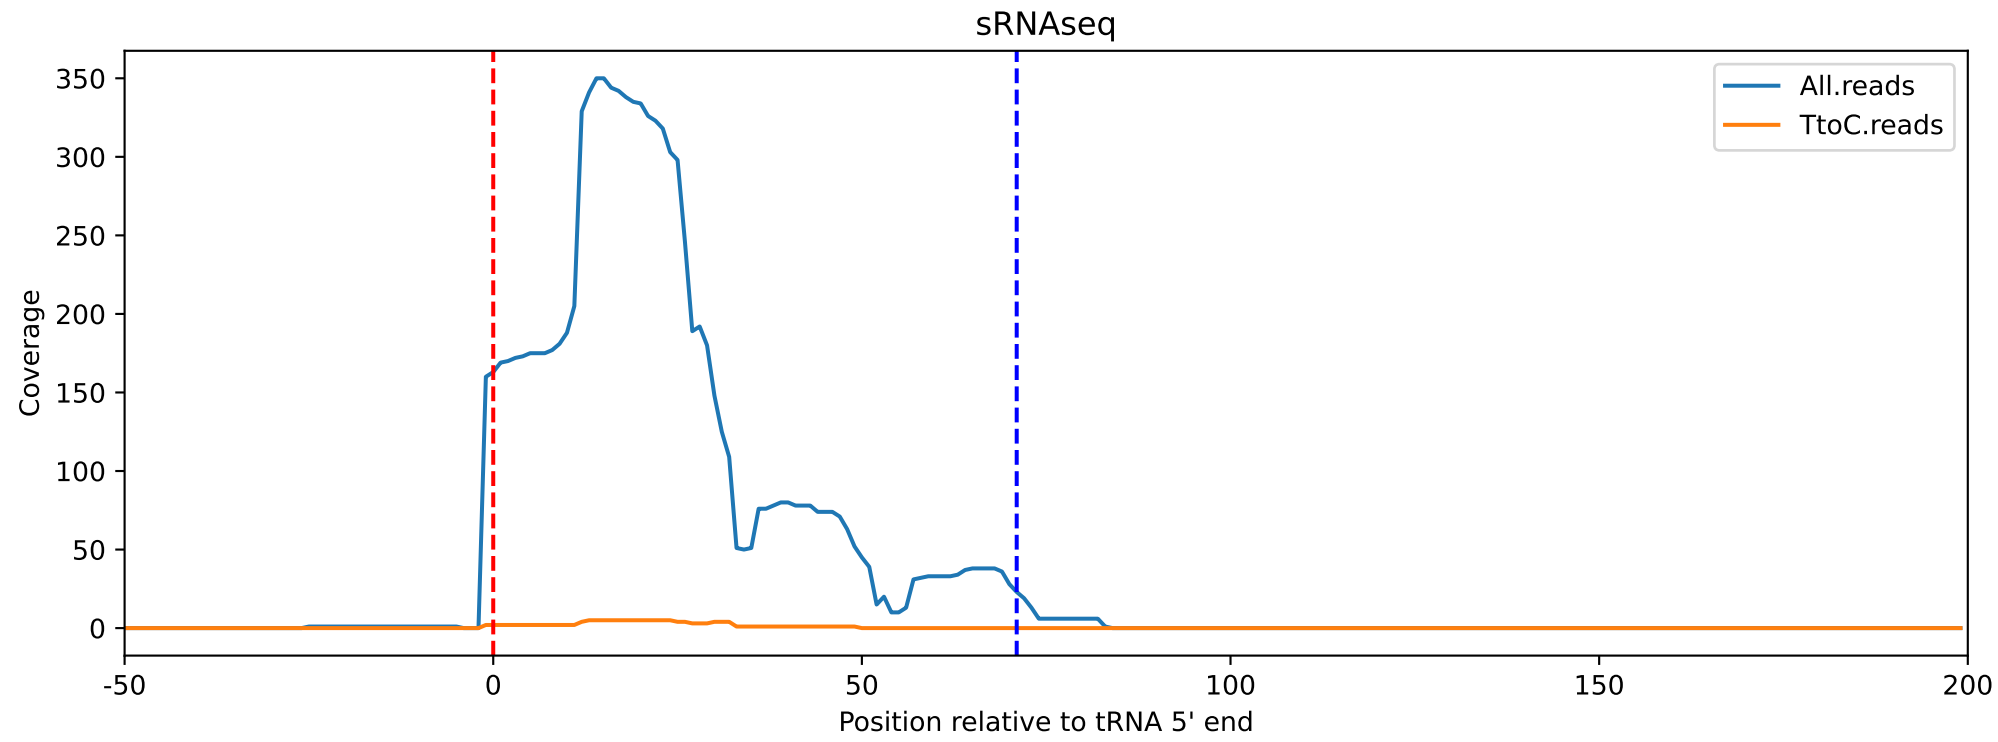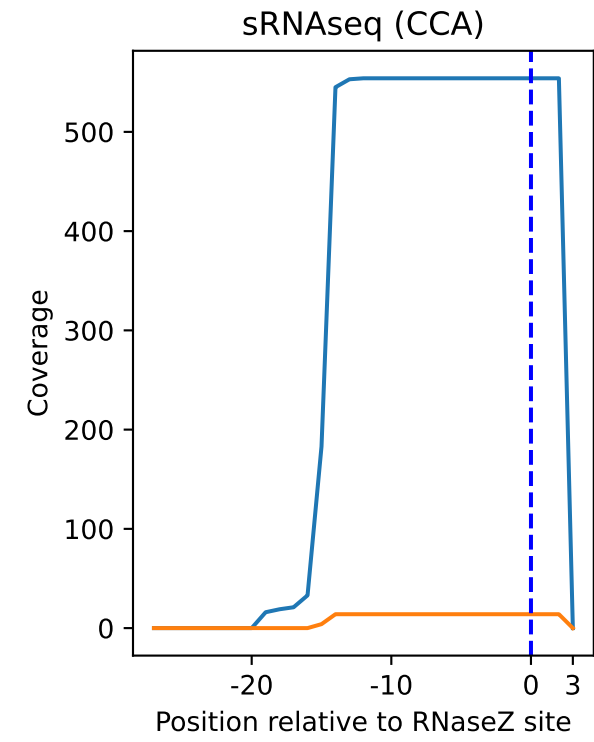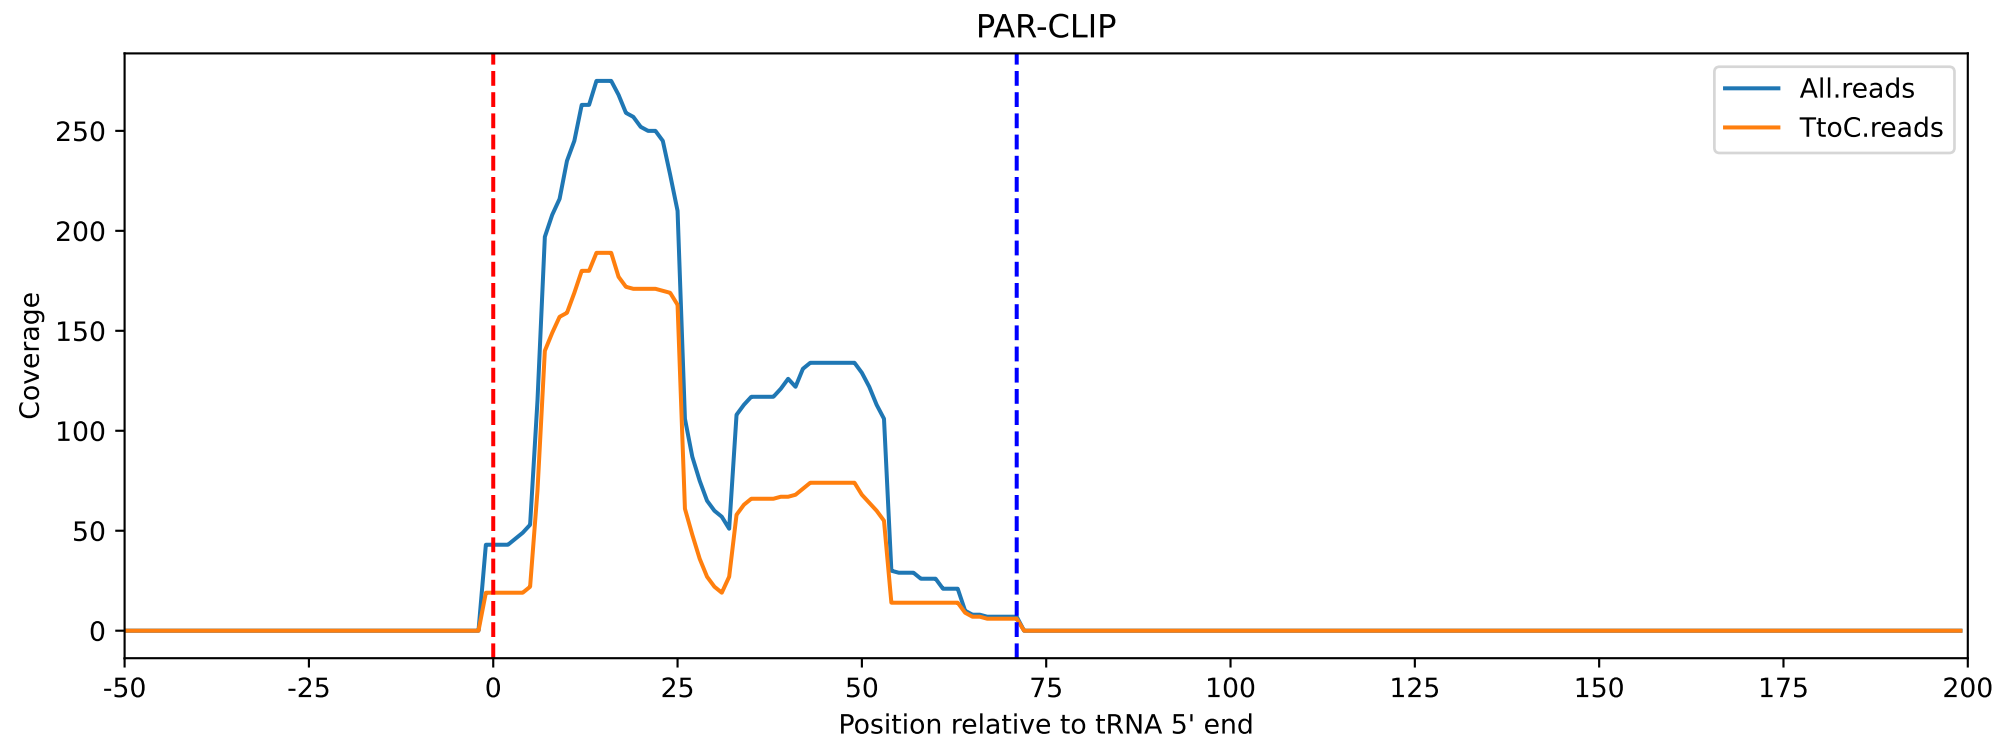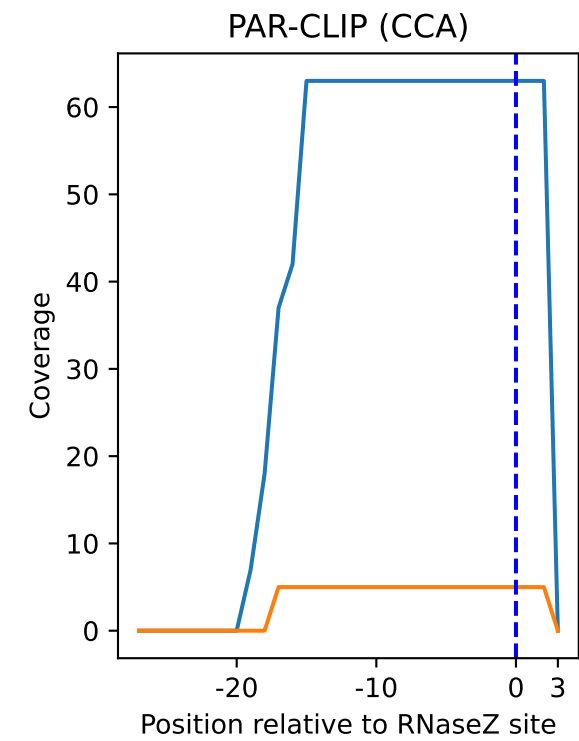

# tRNA-Ala-AGC-2-10

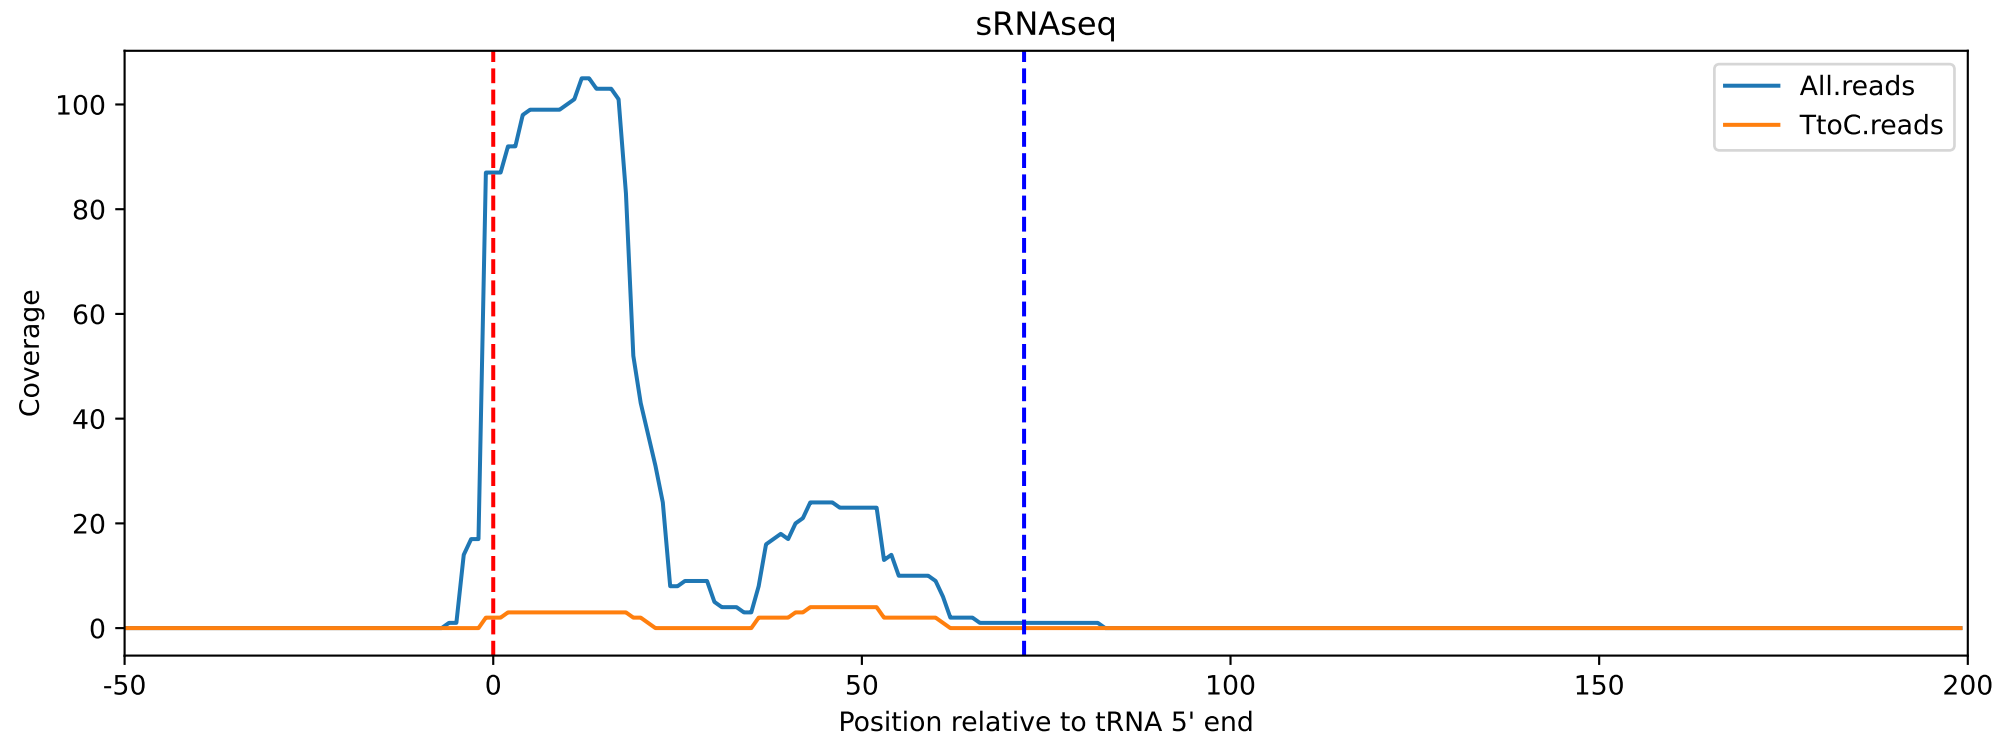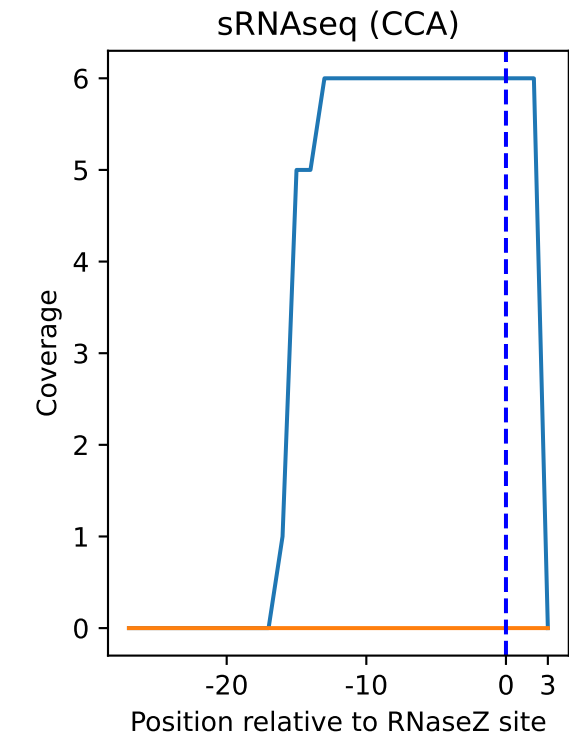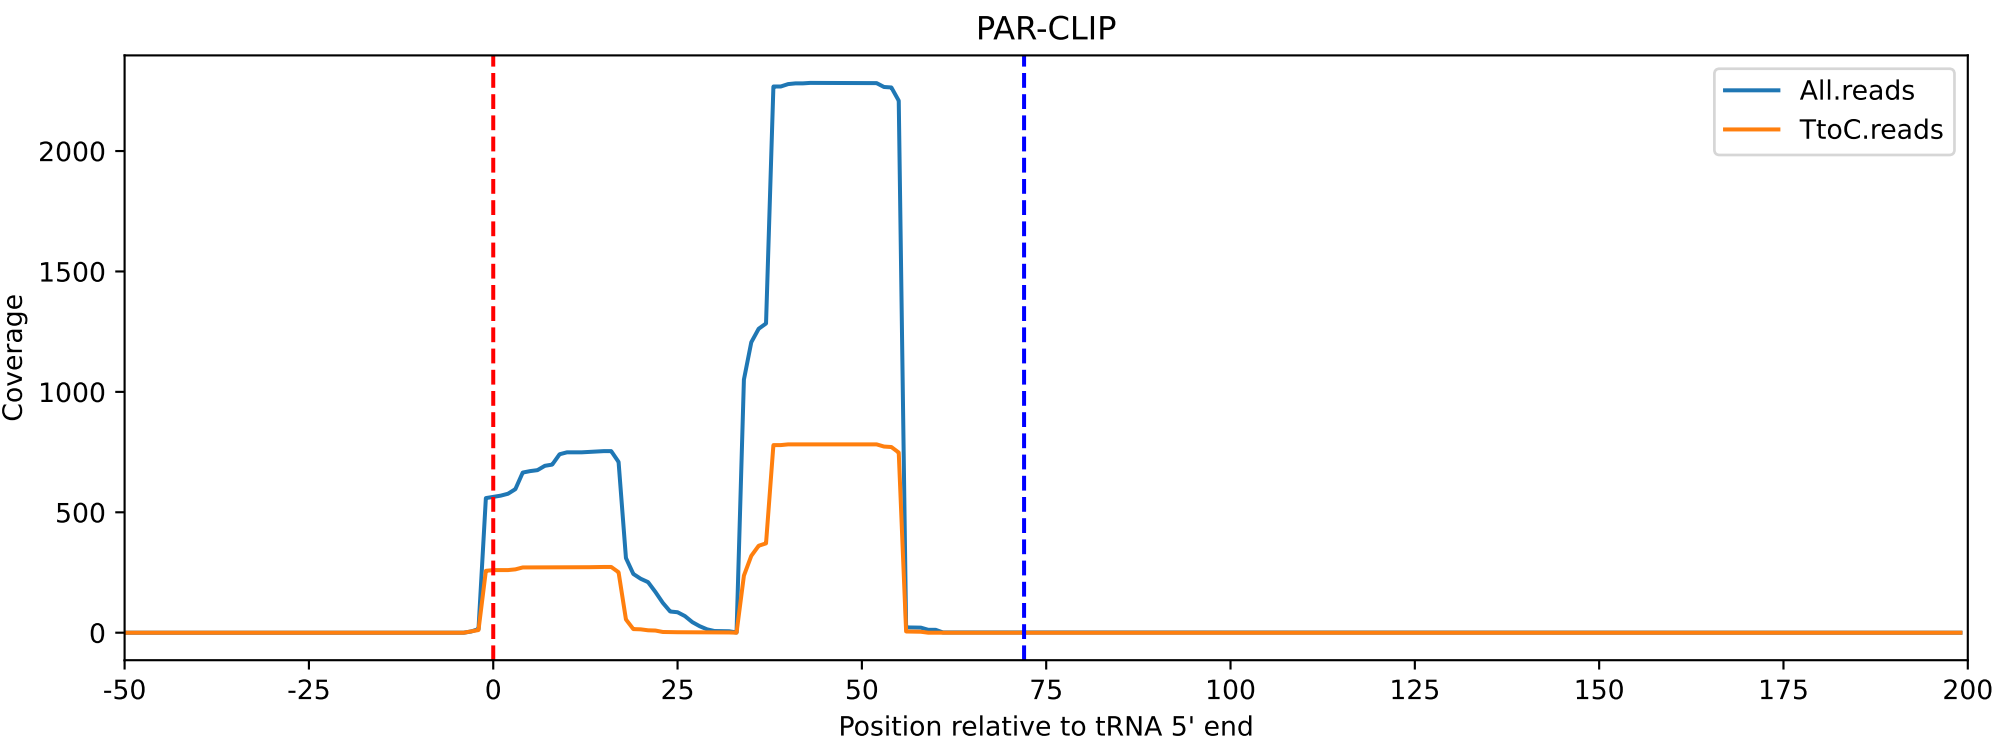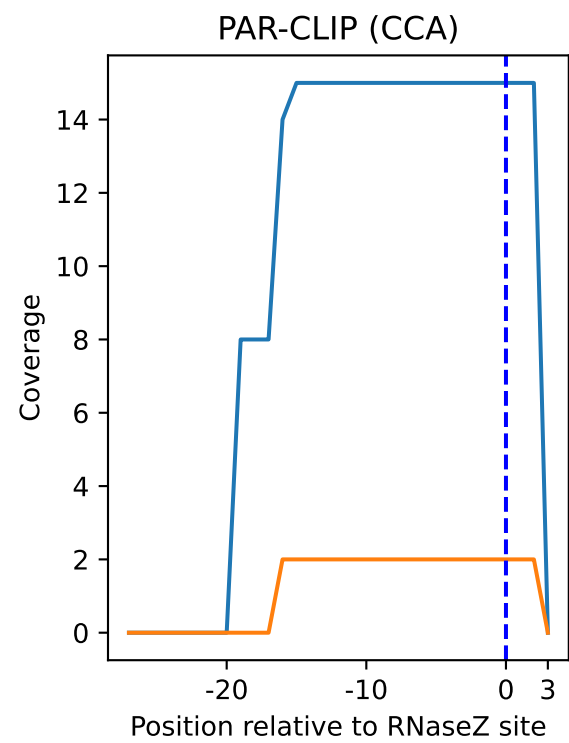



# tRNA-Lys-CTT-1-1

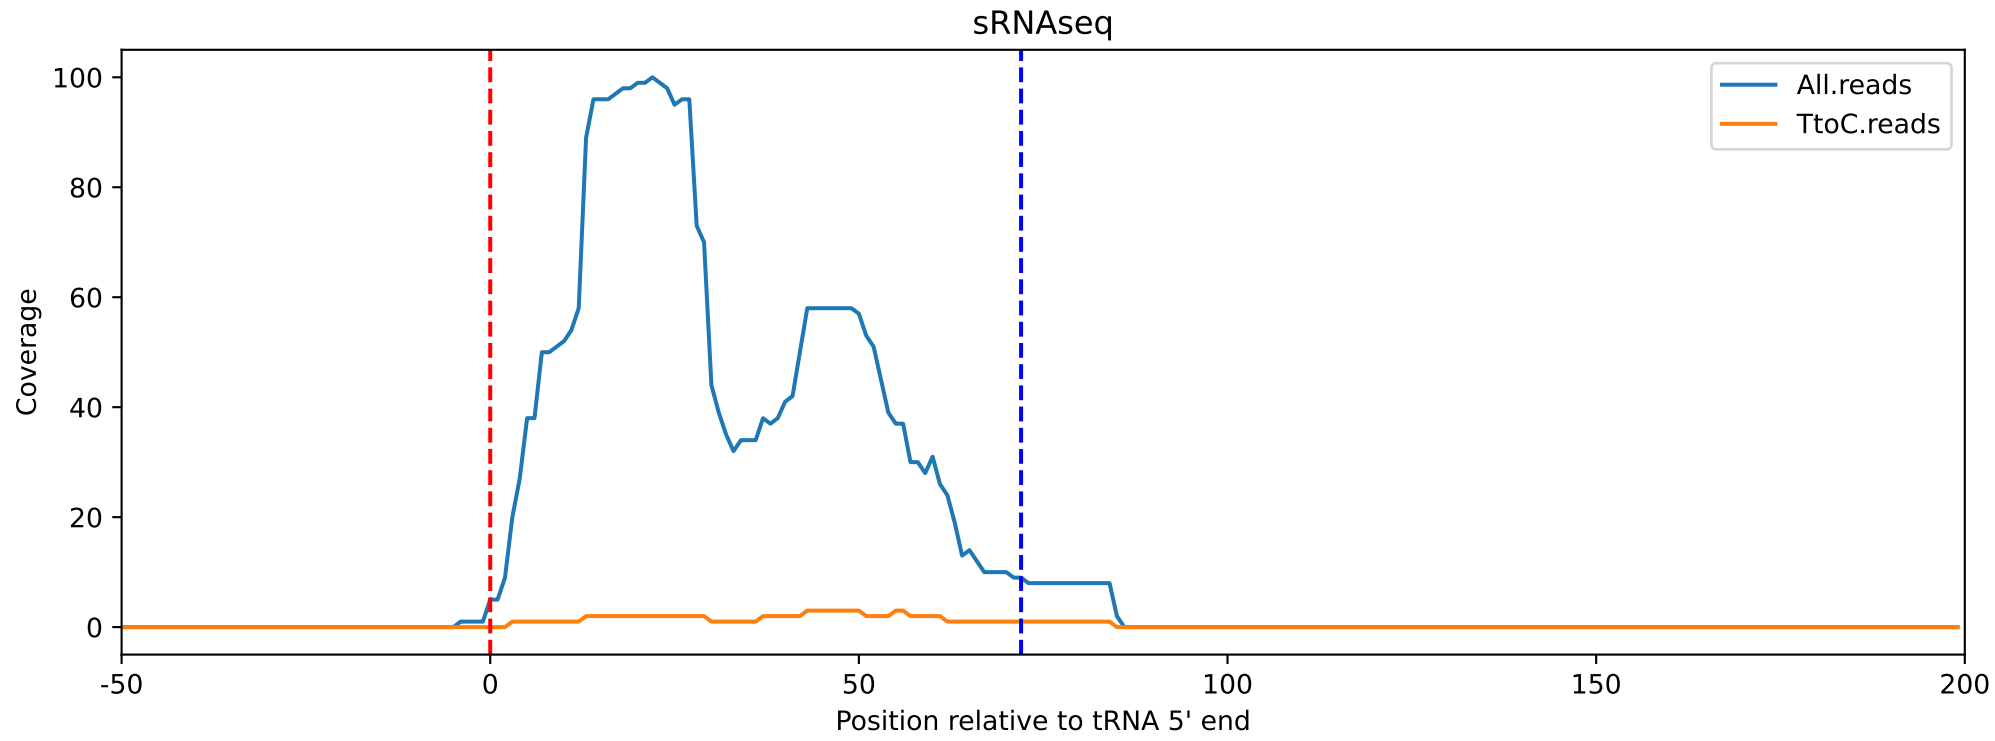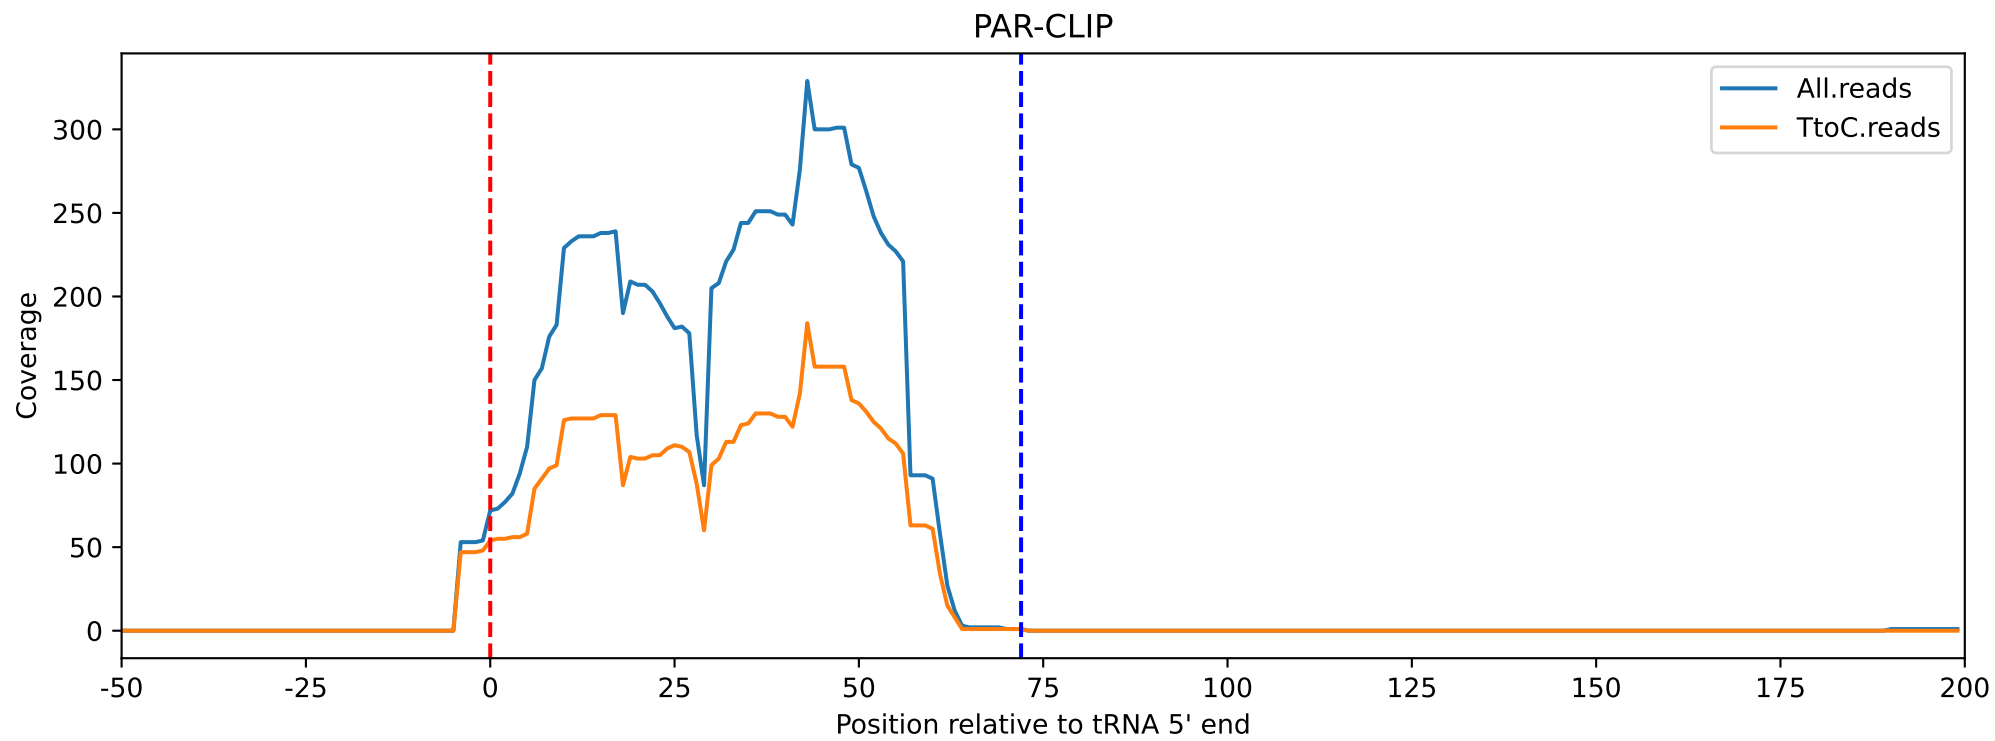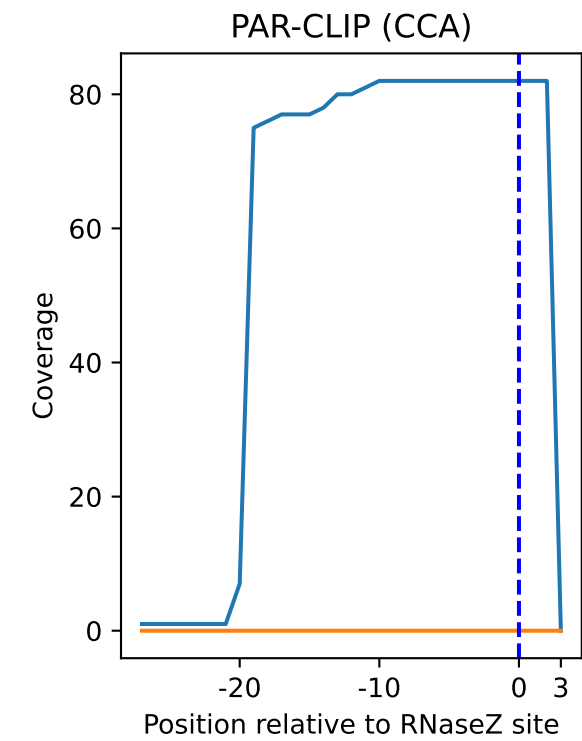

# tRNA-Val-AAC-1-1

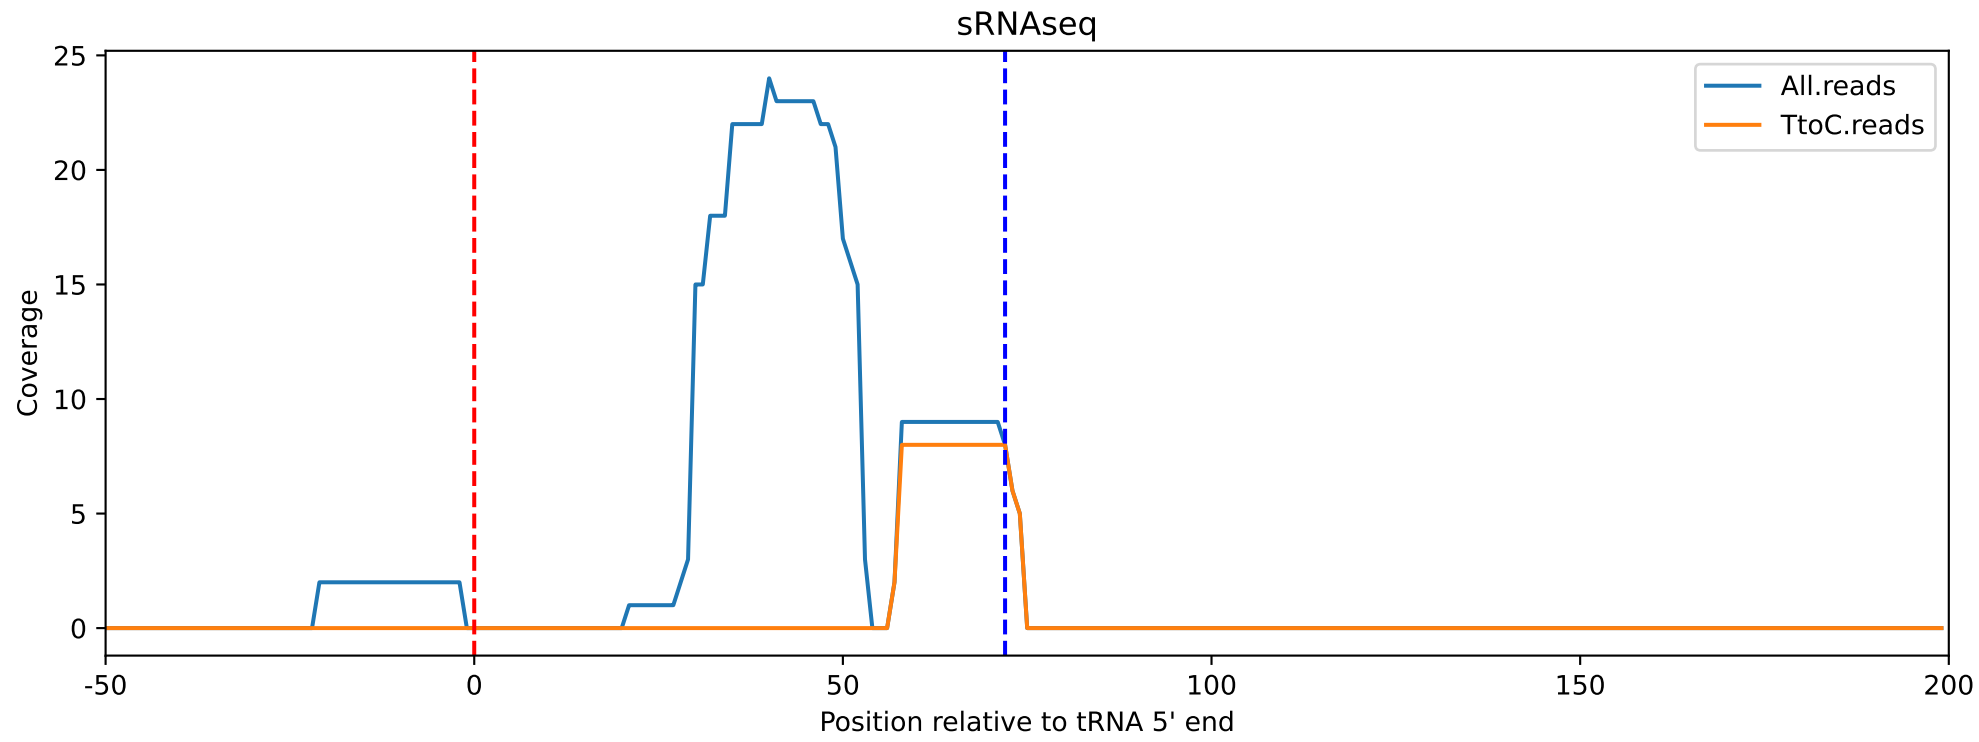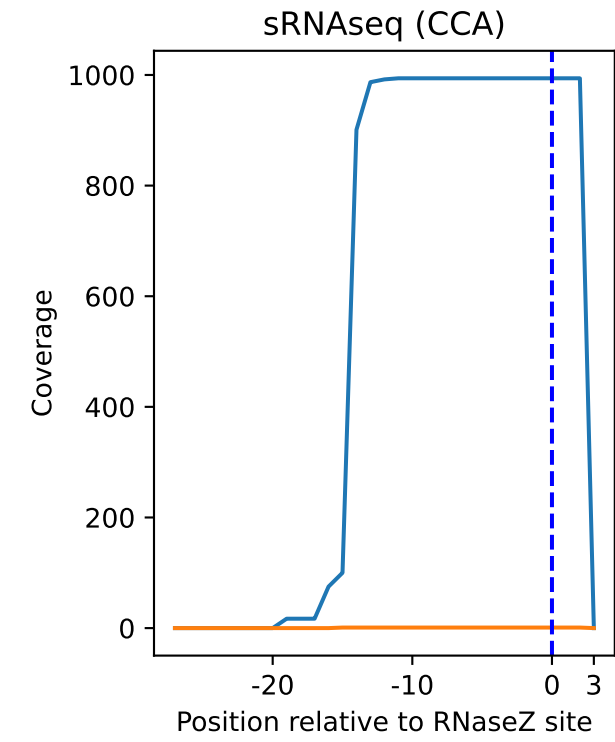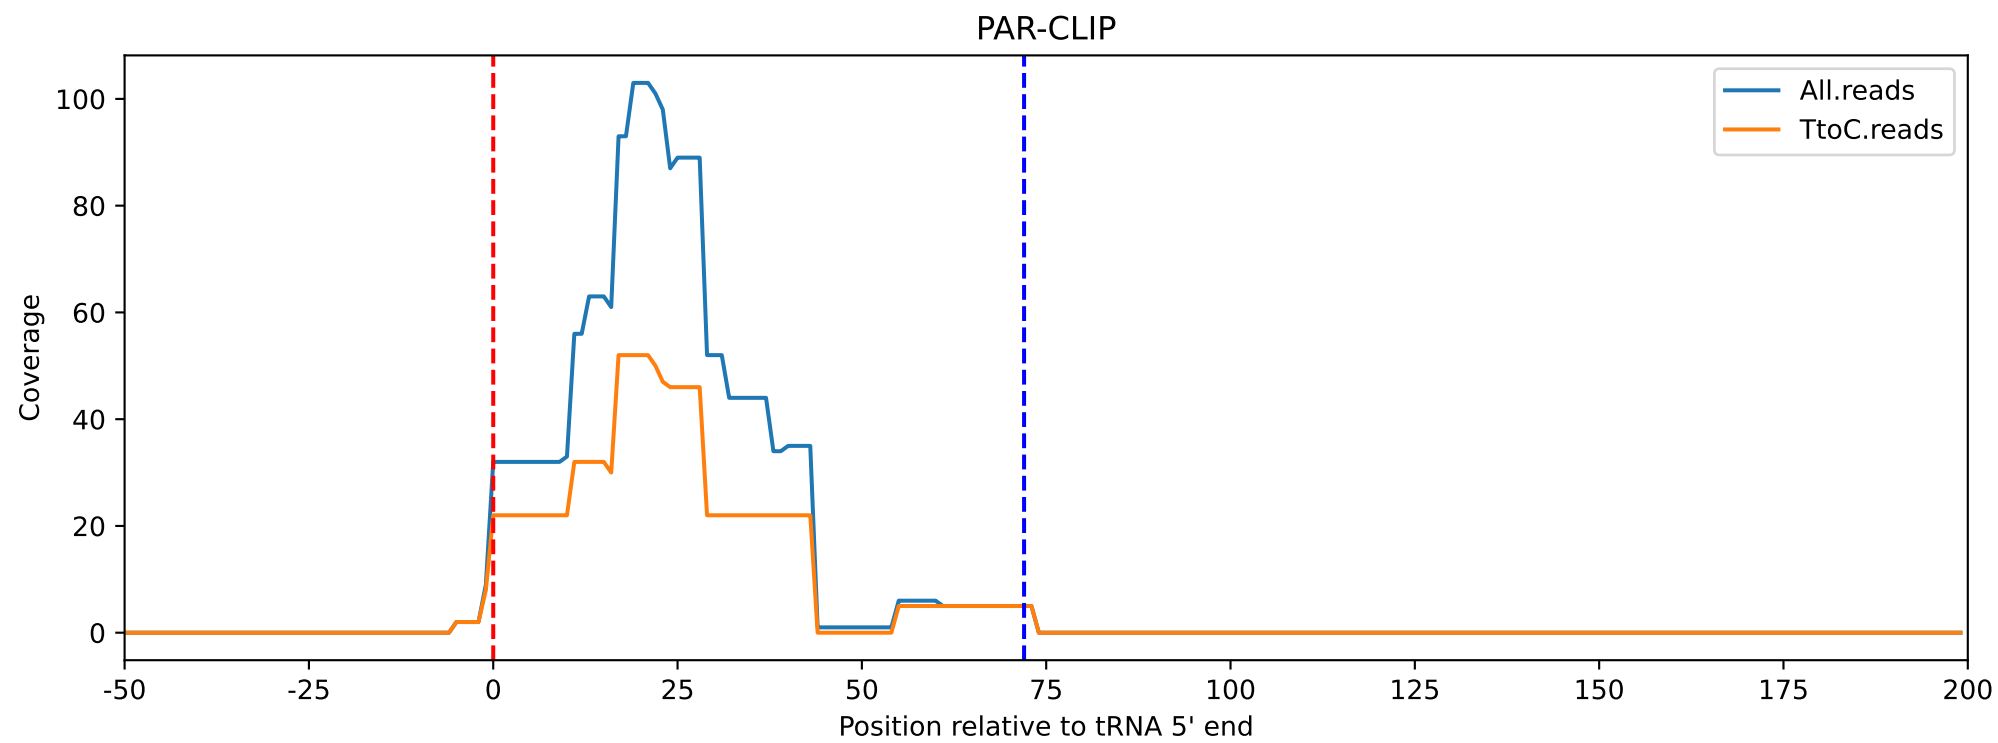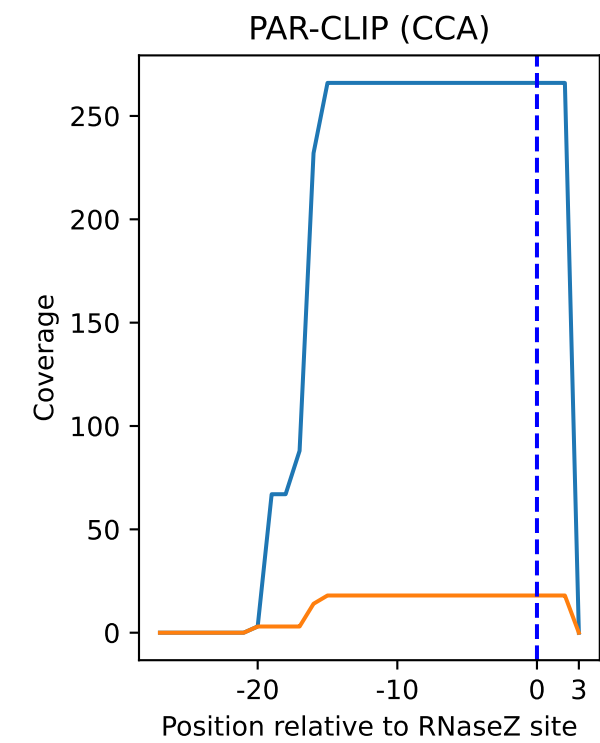

# tRNA-Asp-GTC-1-8

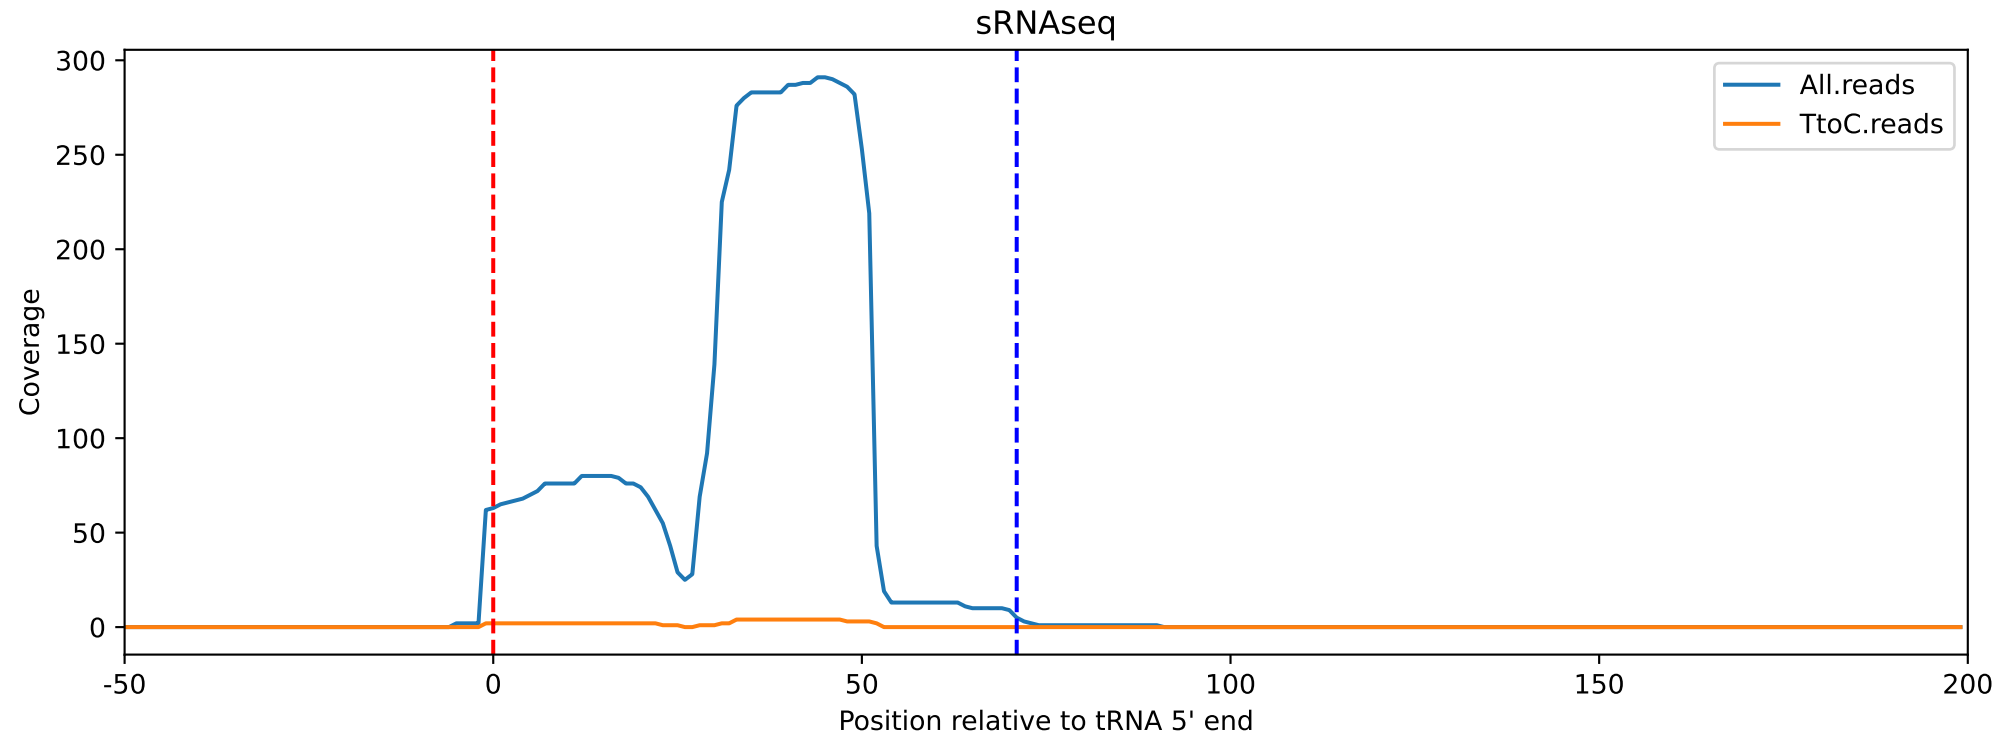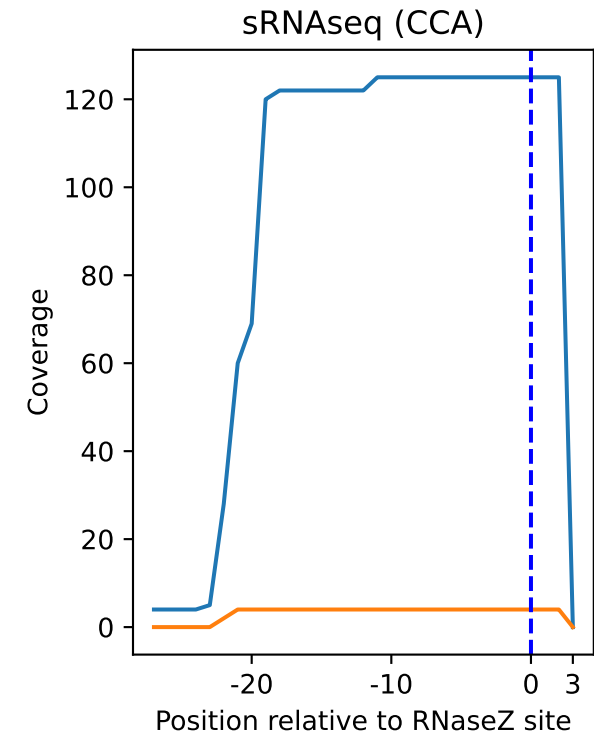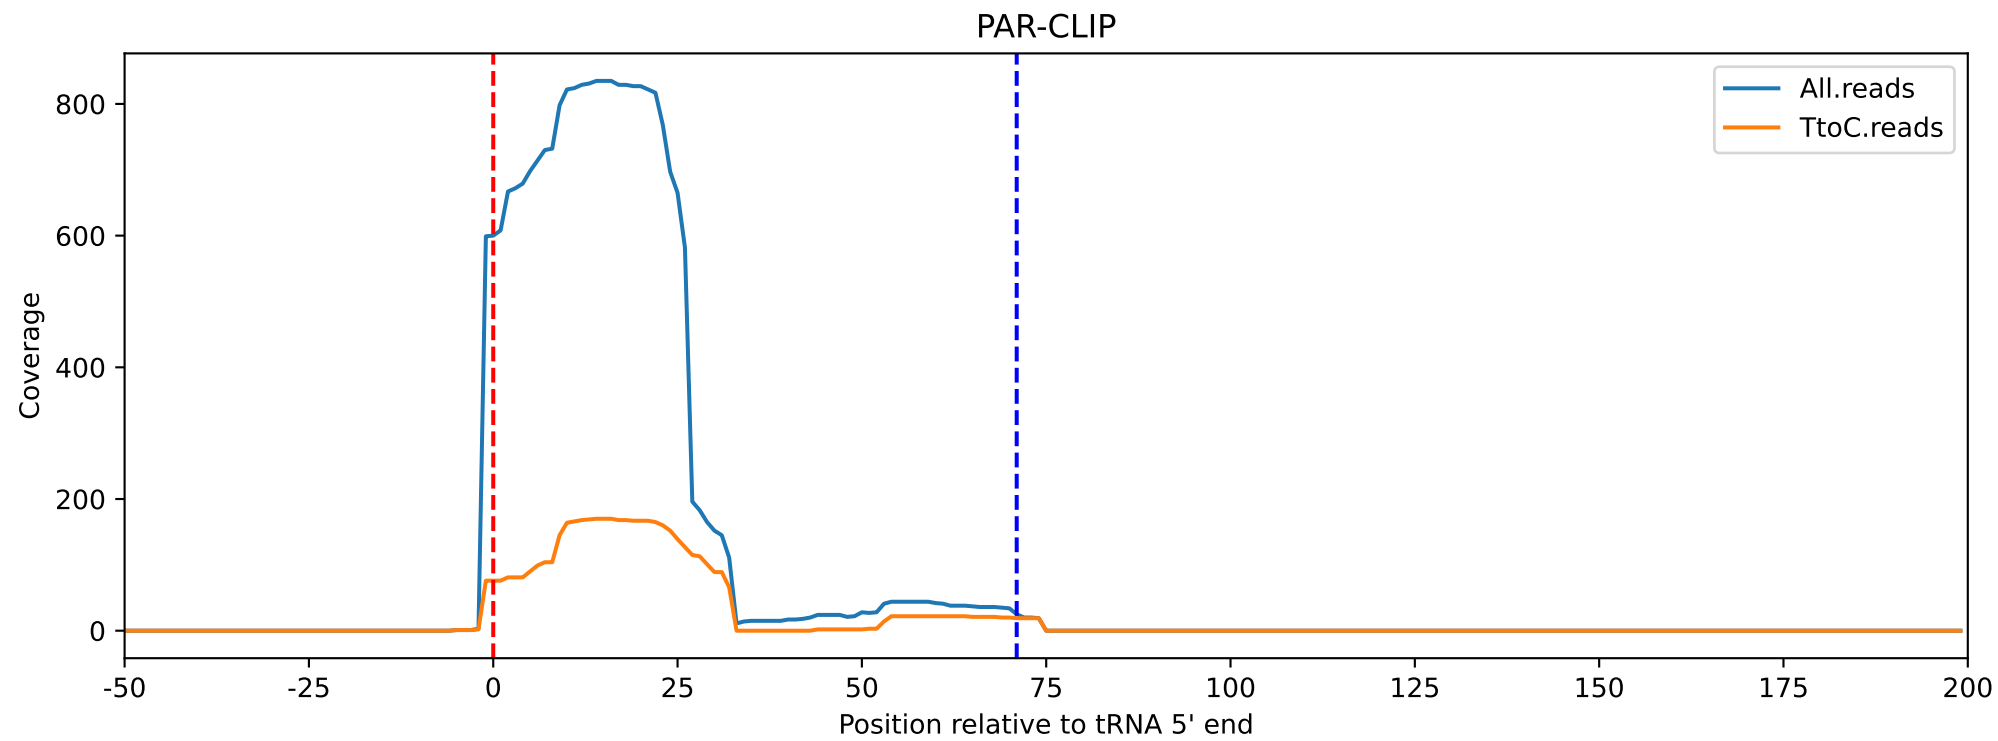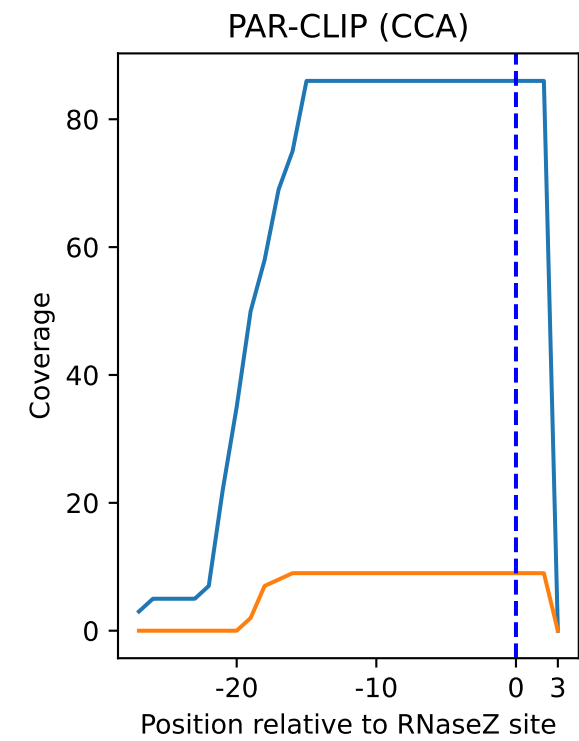

# tRNA-Gln-CTG-2-2

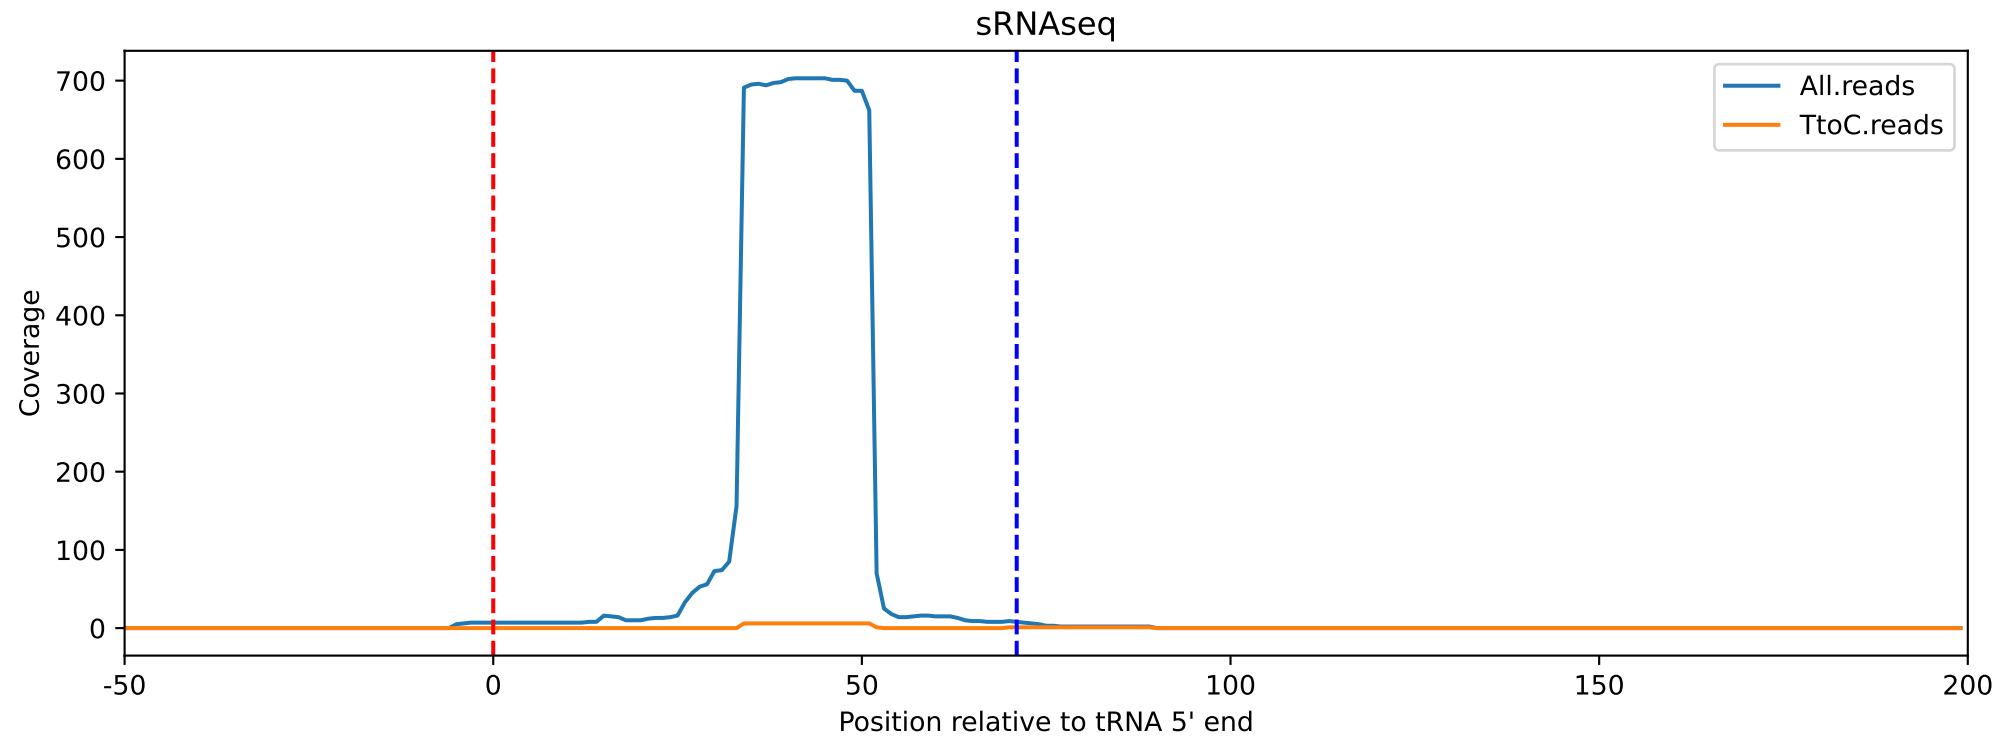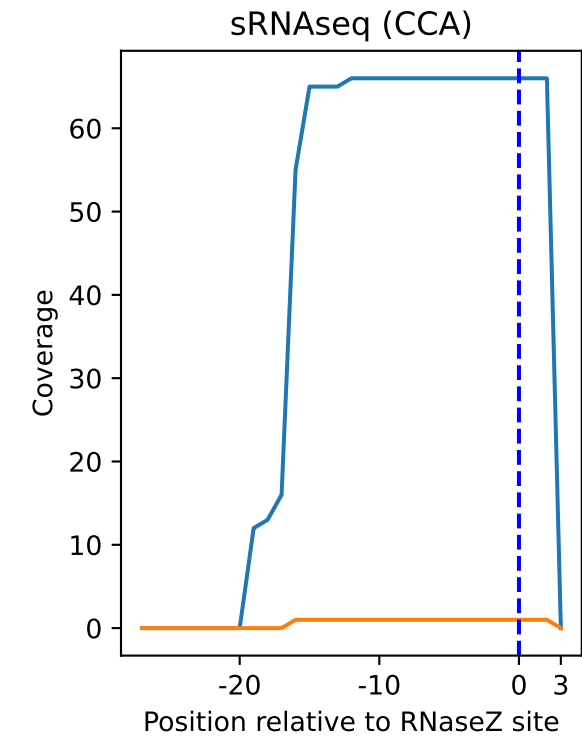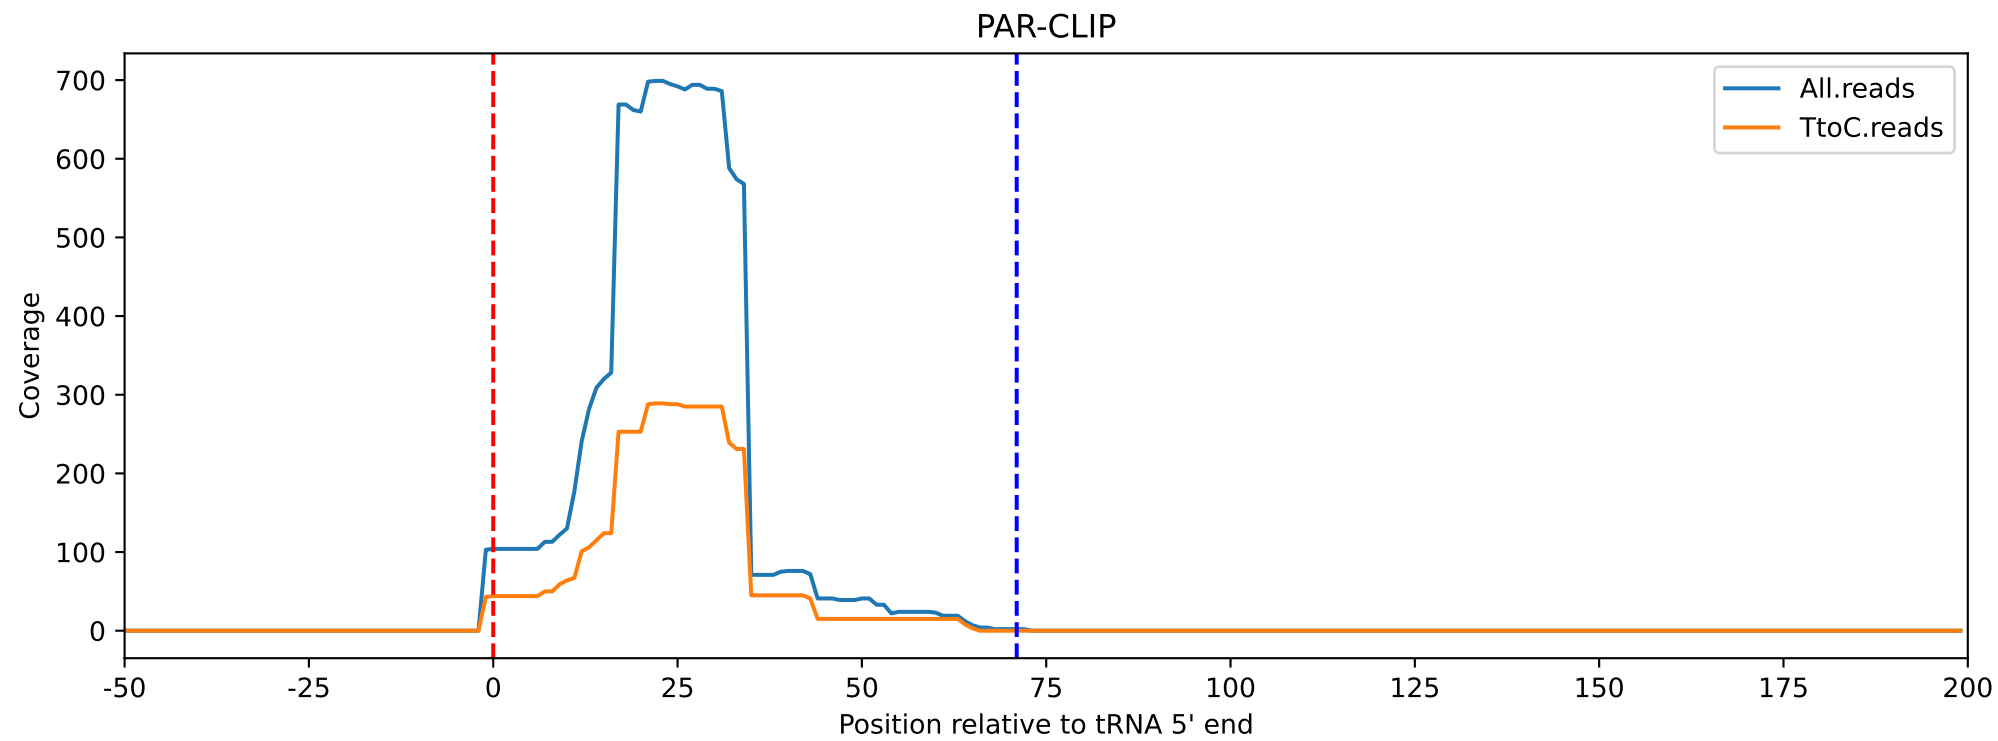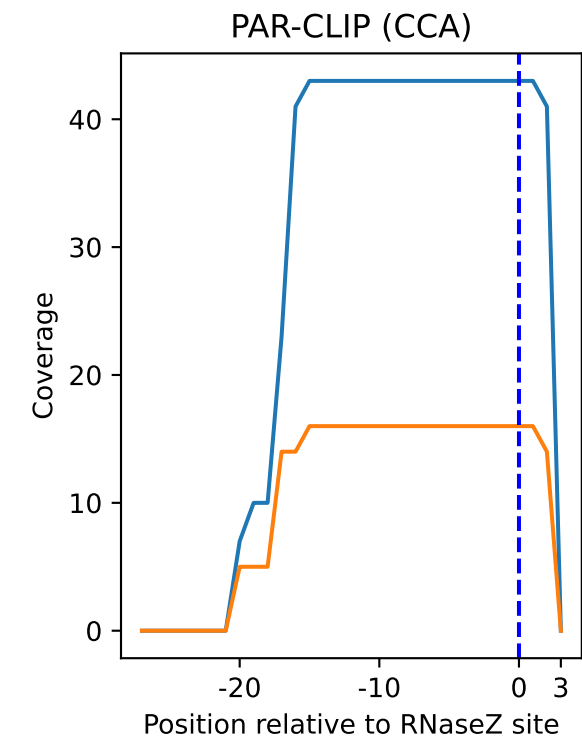

# tRNA-Ser-AGA-2-2

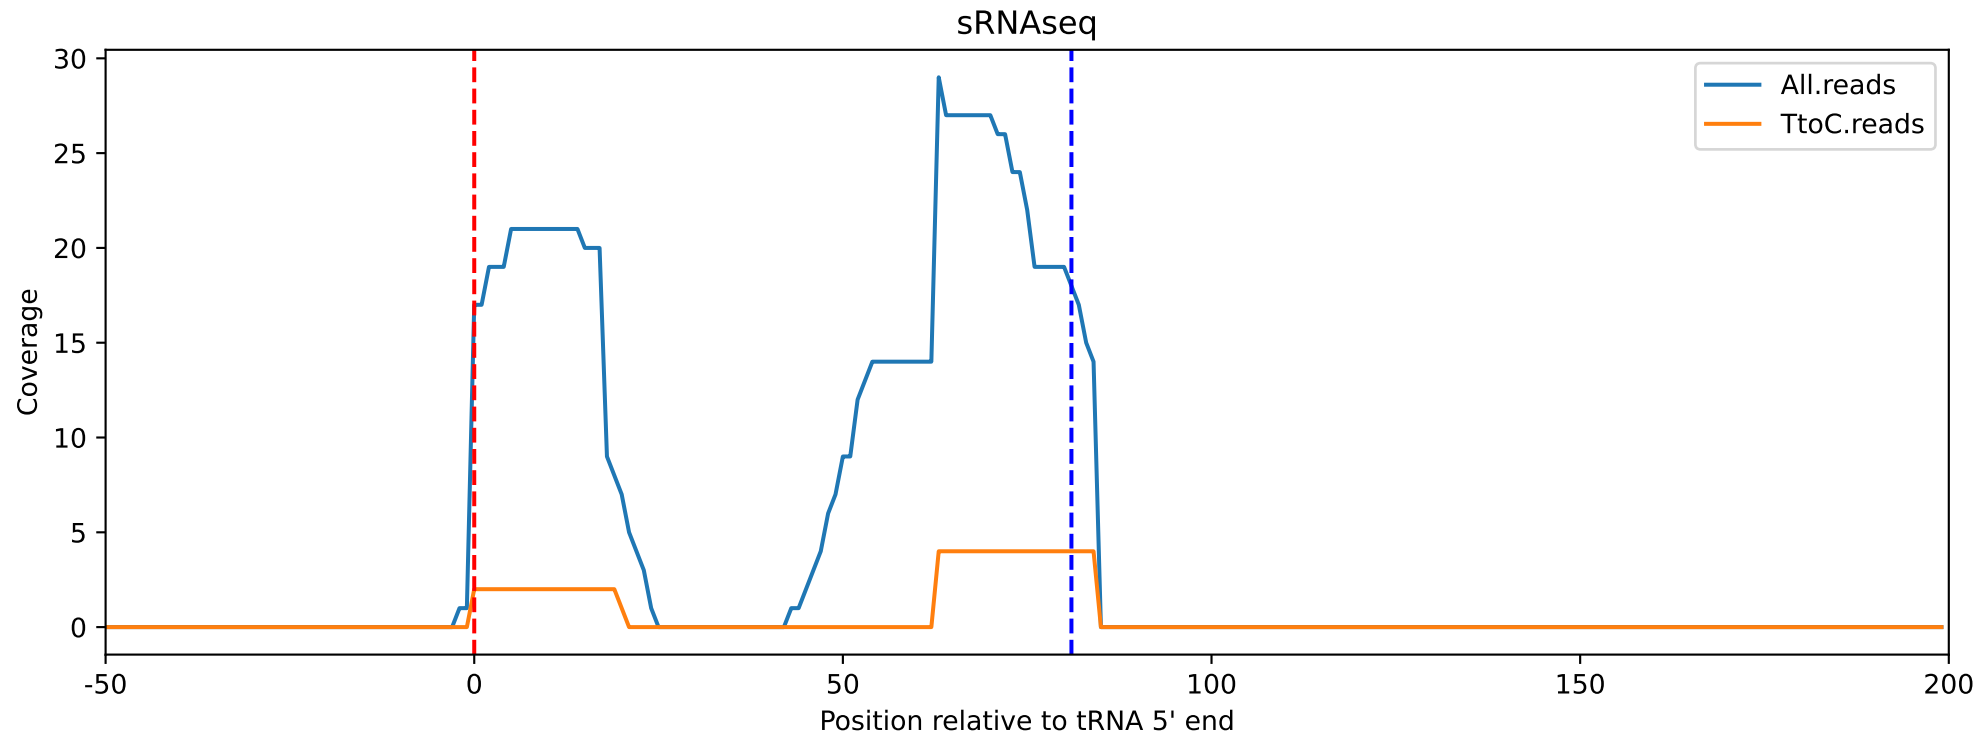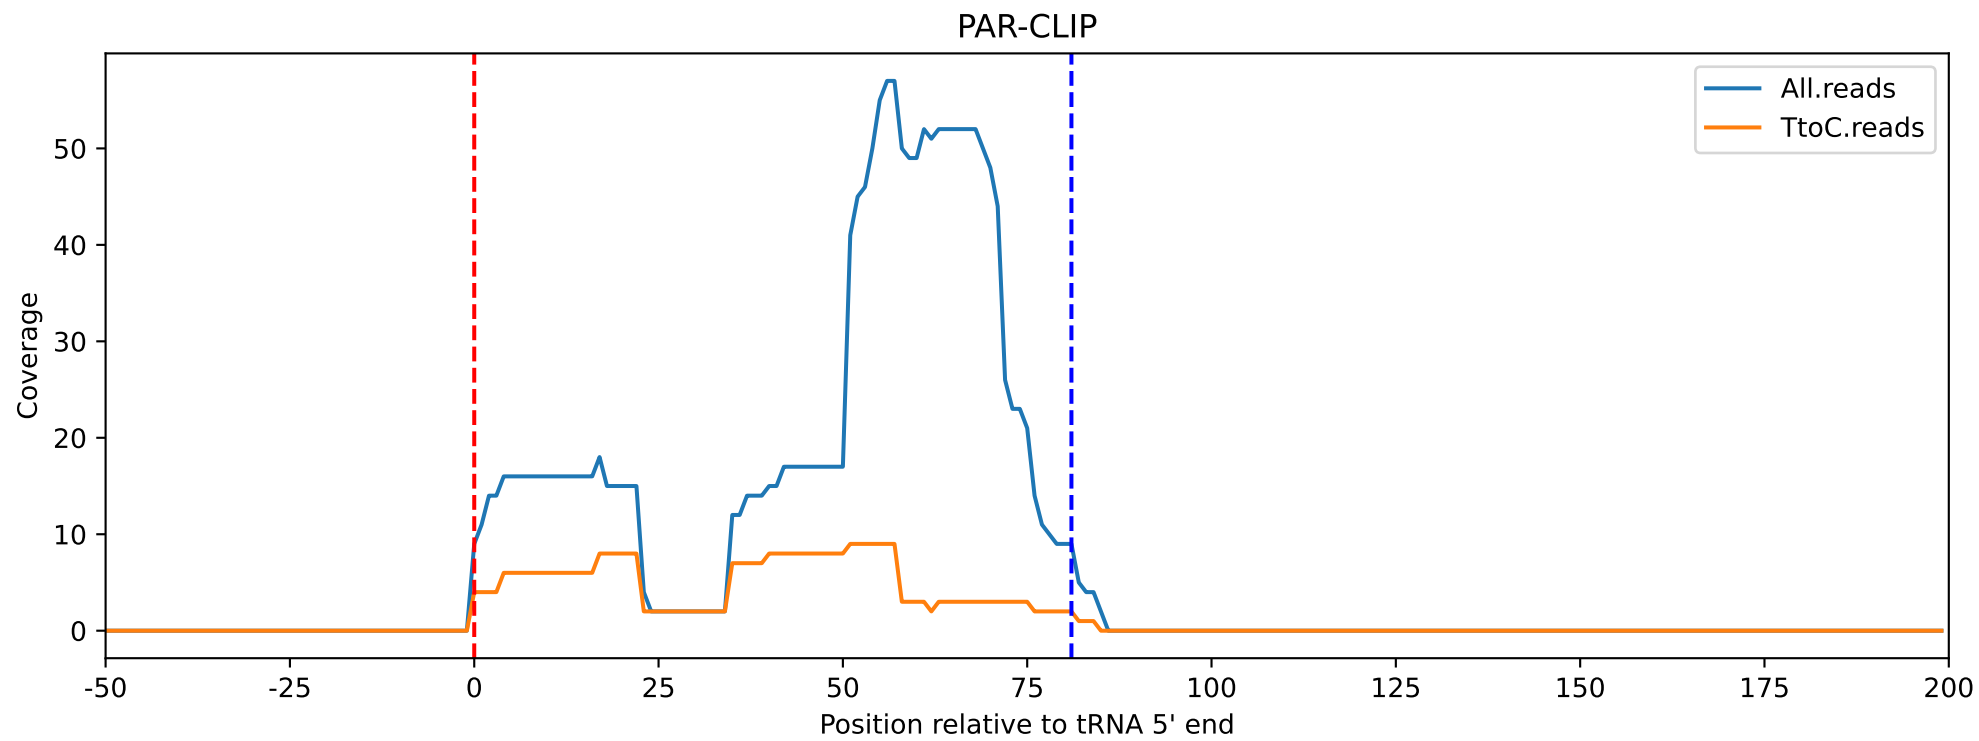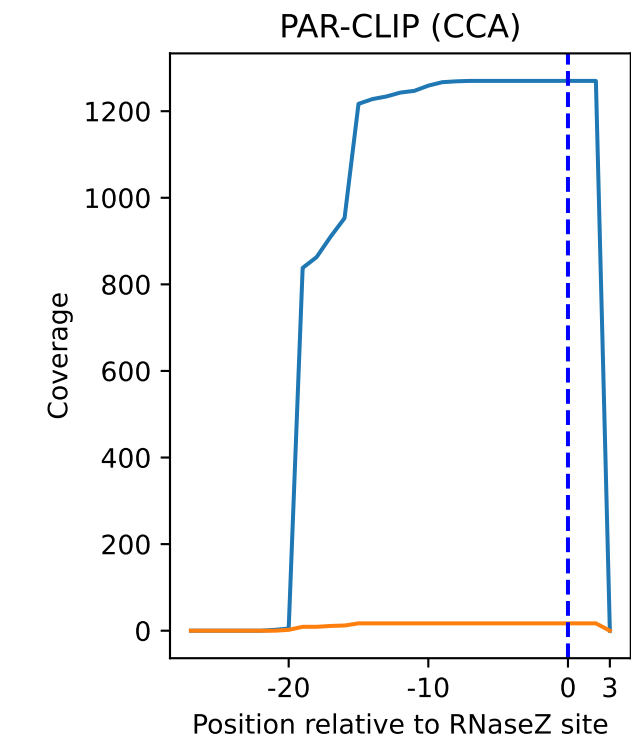

# tRNA-Asp-GTC-1-2

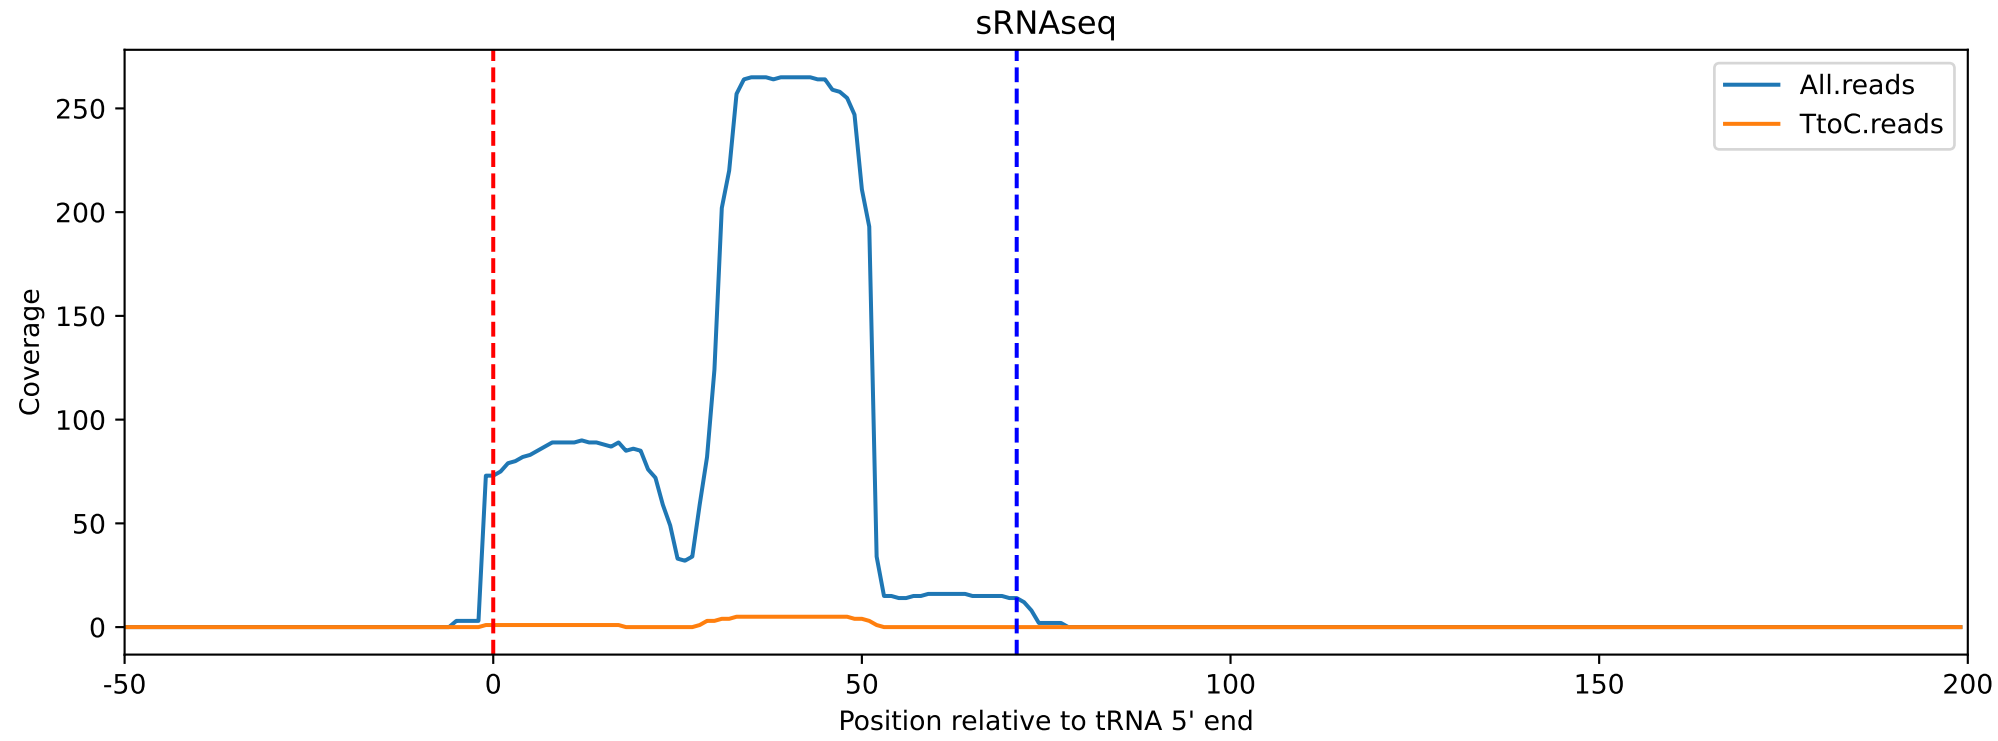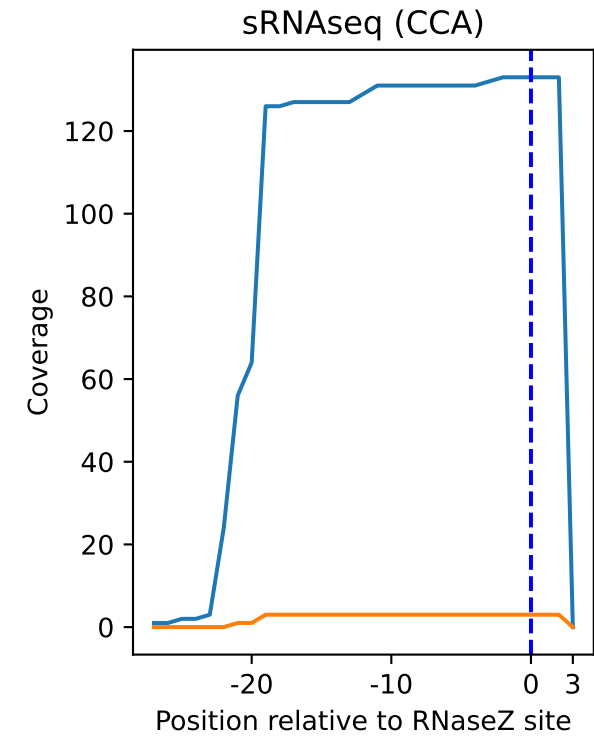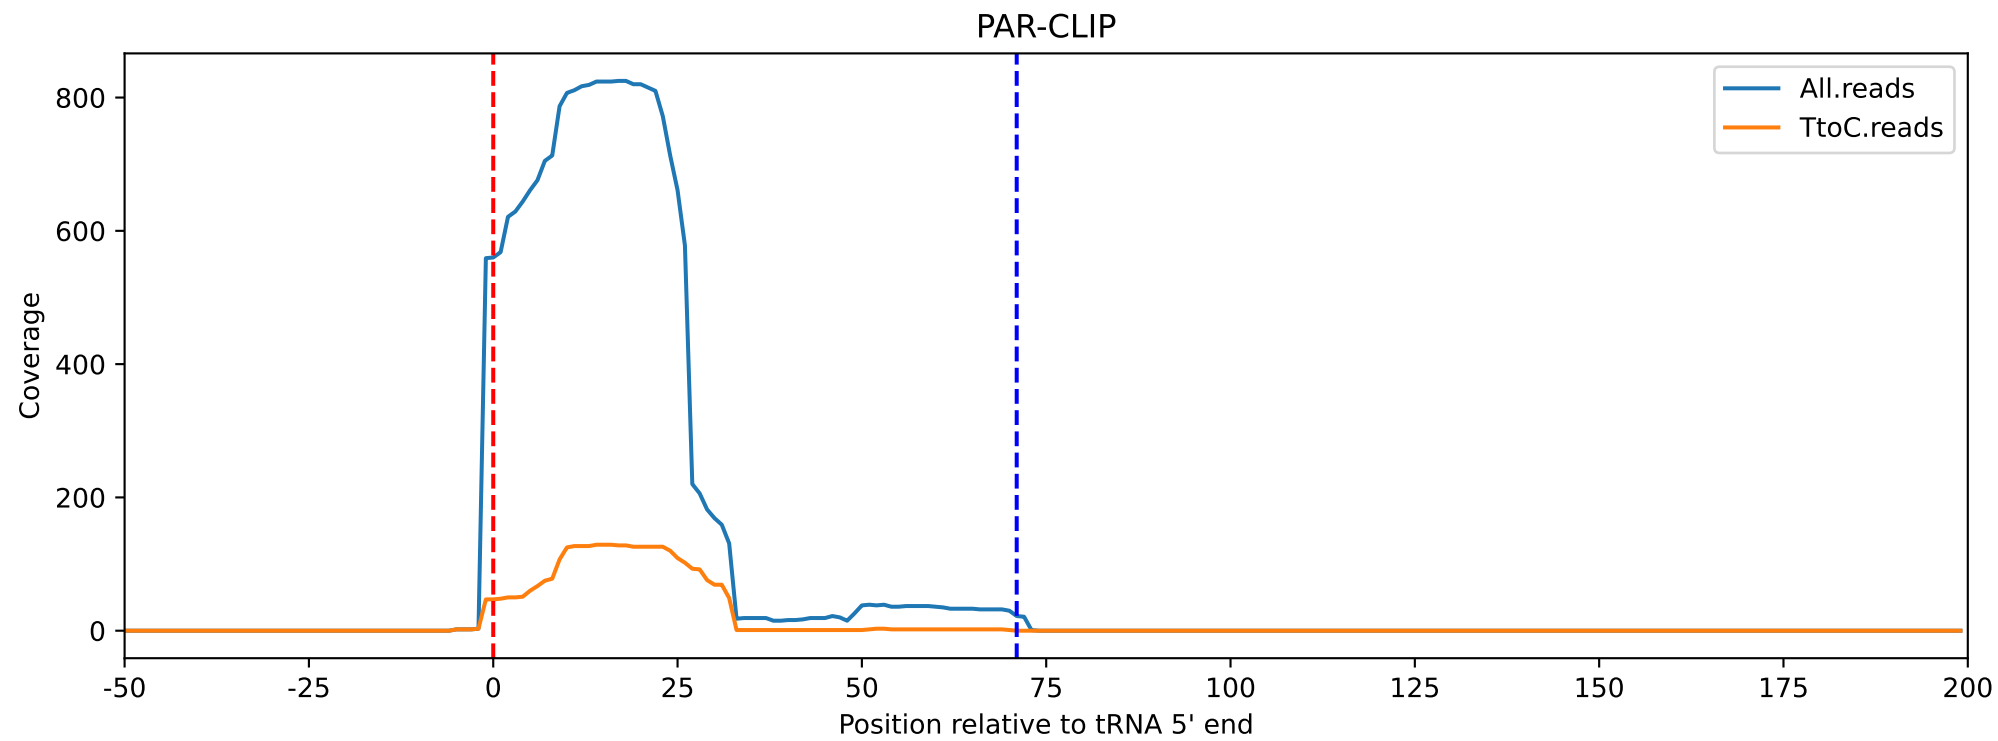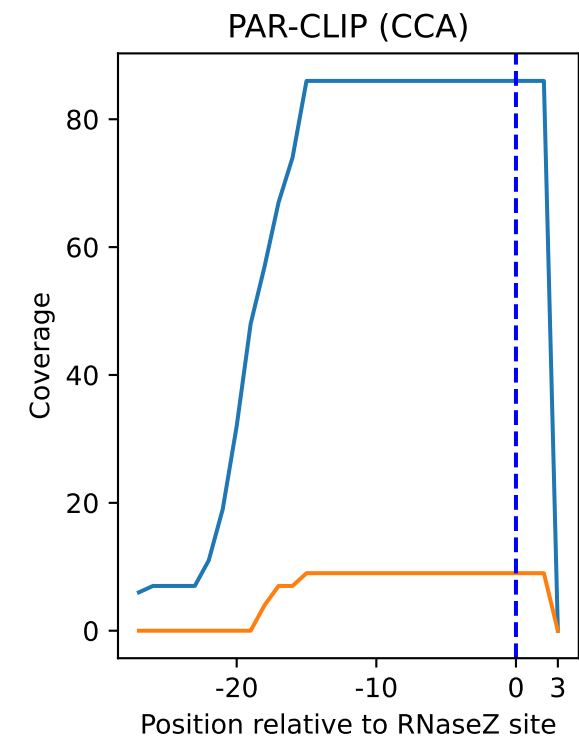

# tRNA-Arg-CCT-1-2

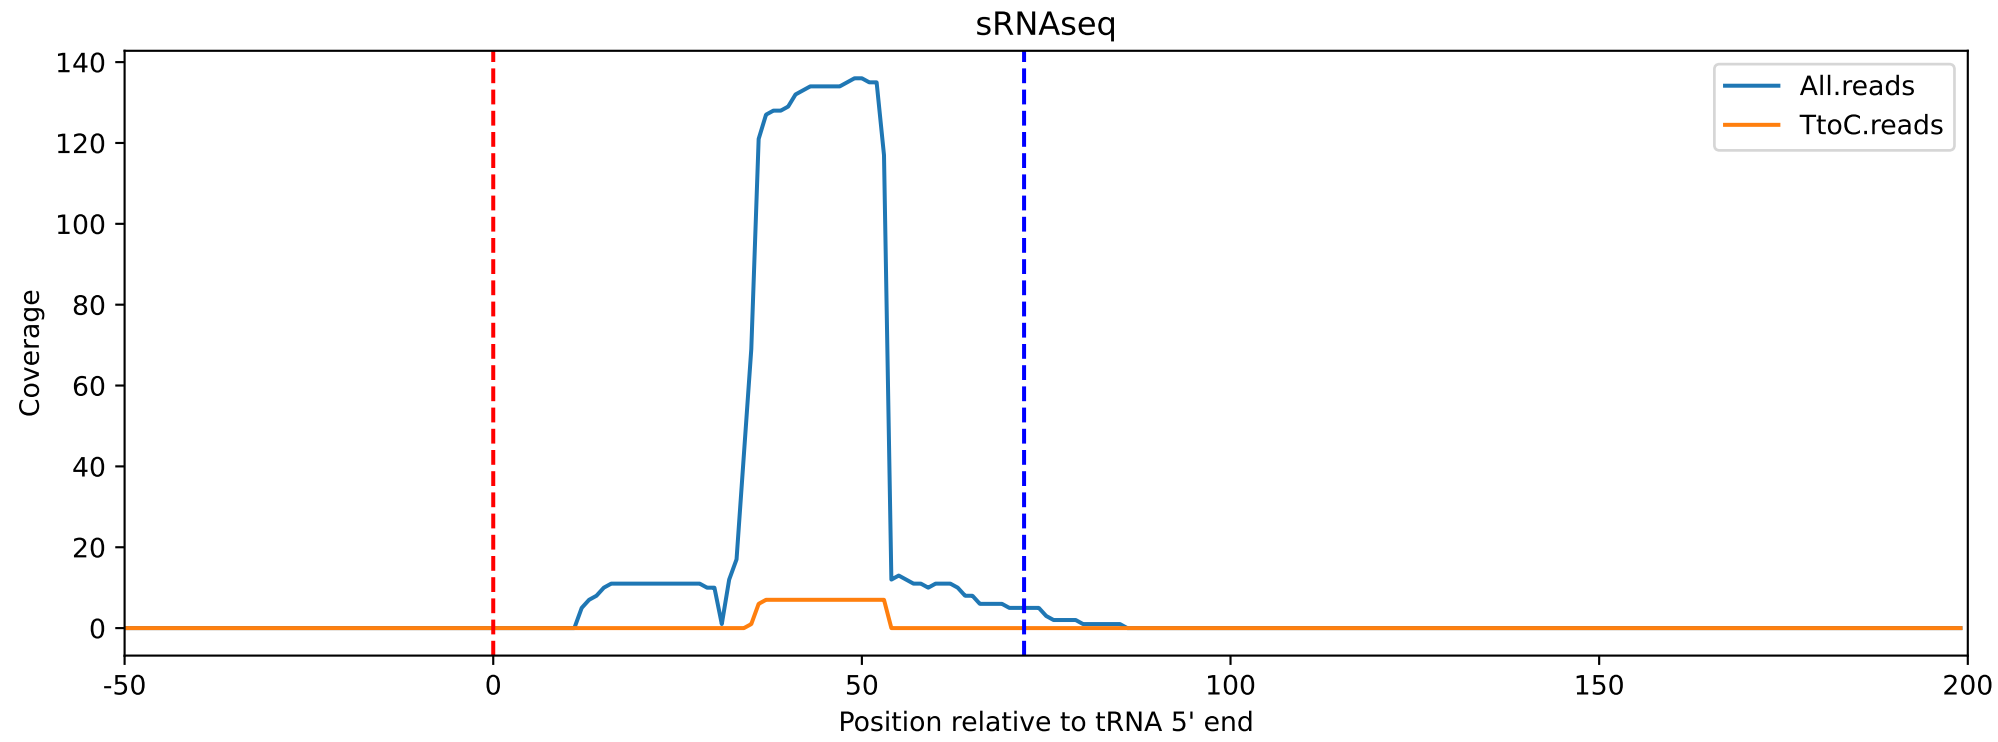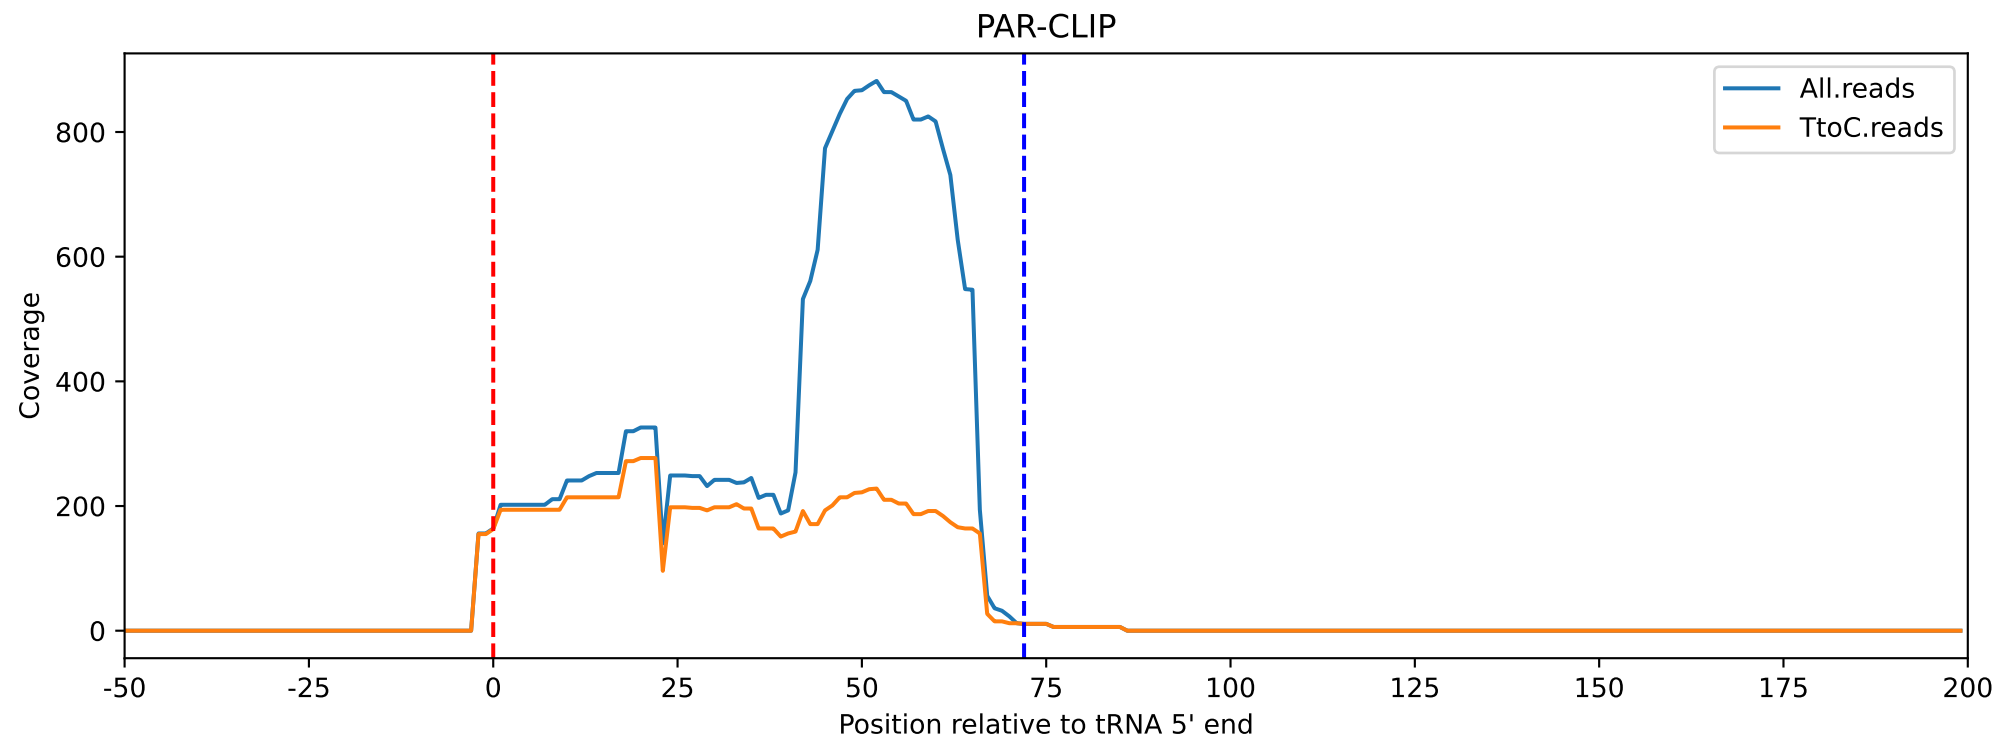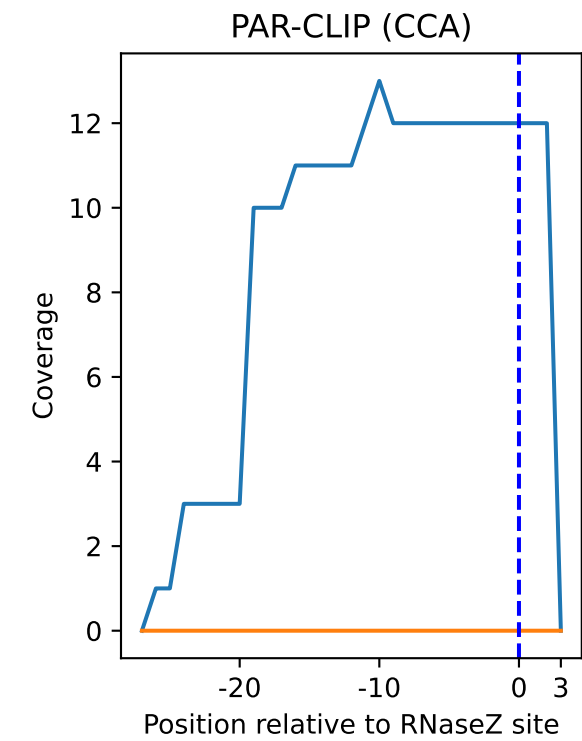

# tRNA-Lys-CTT-1-3

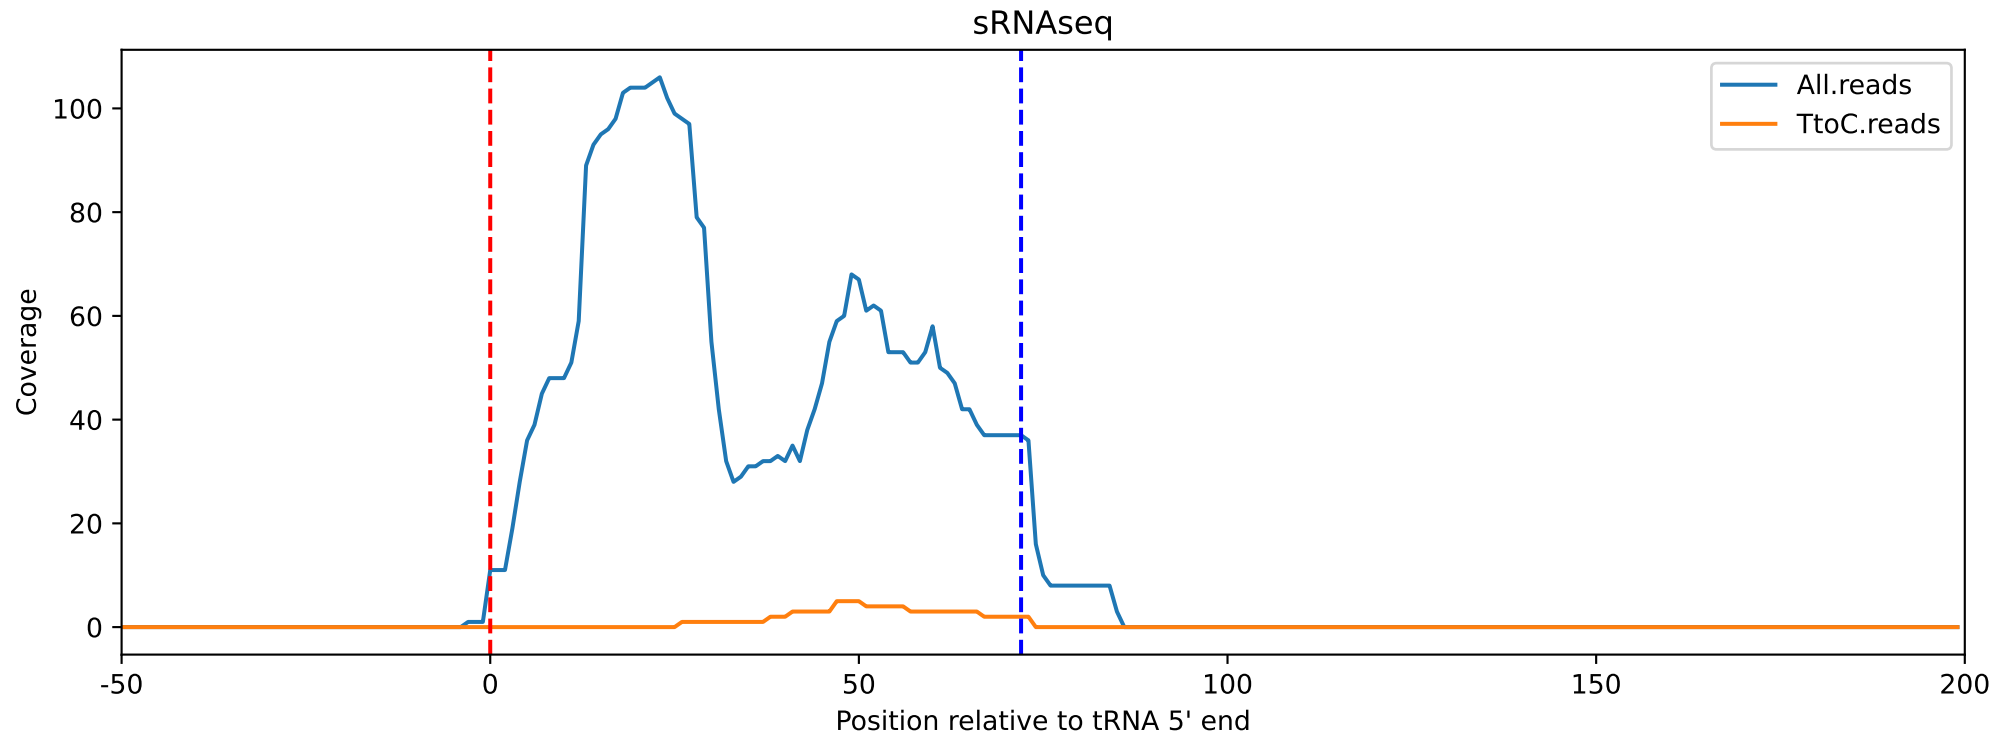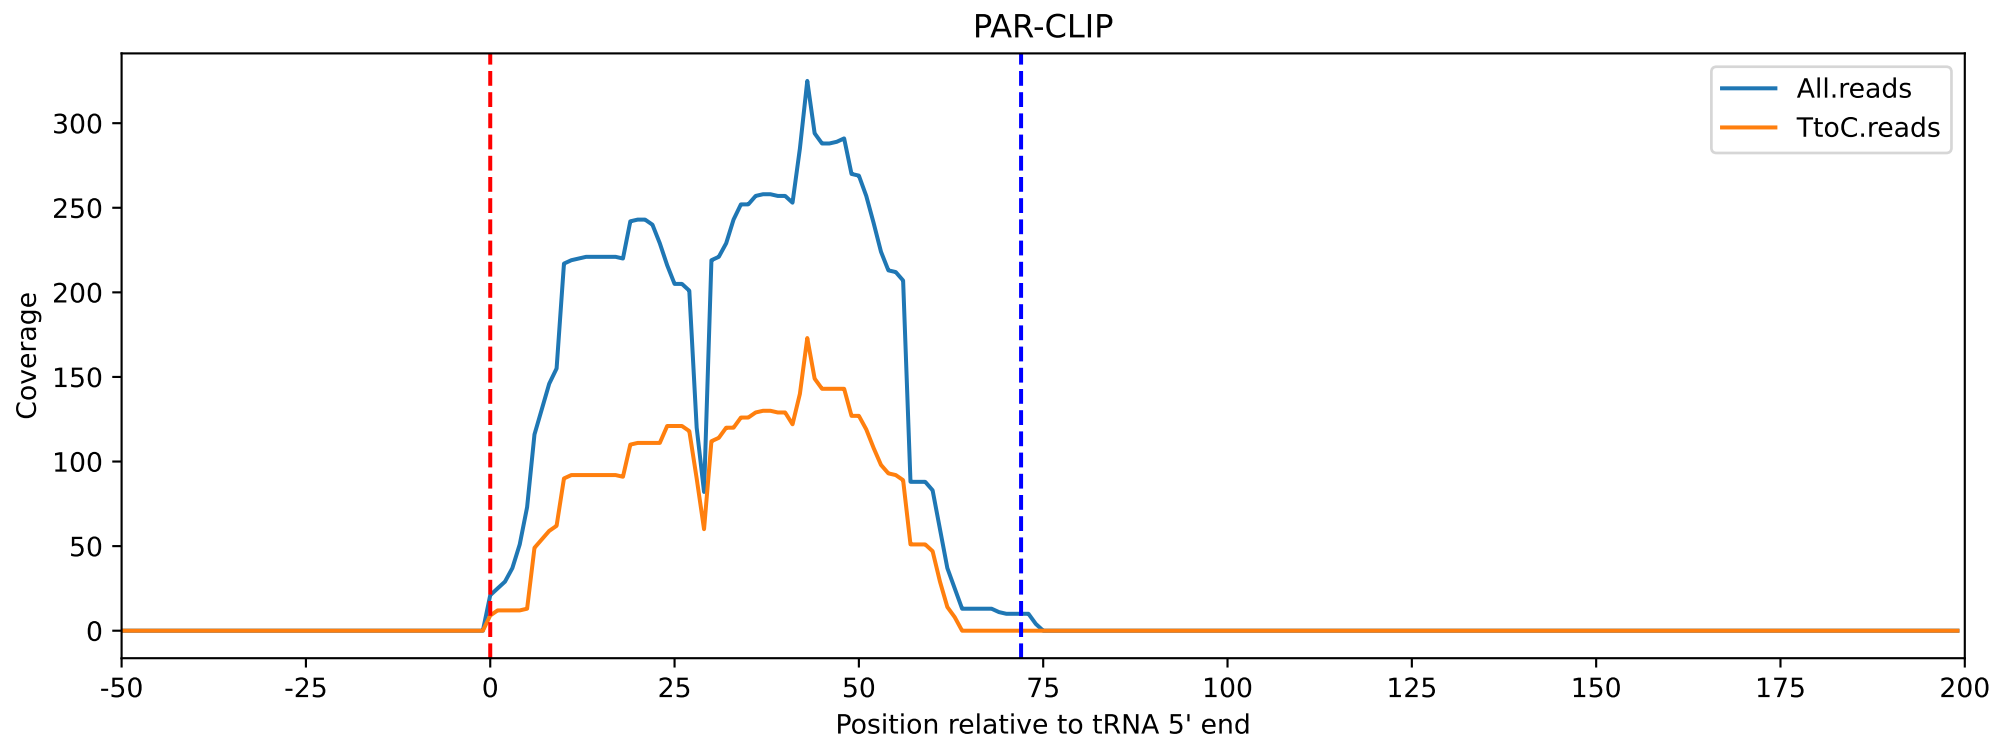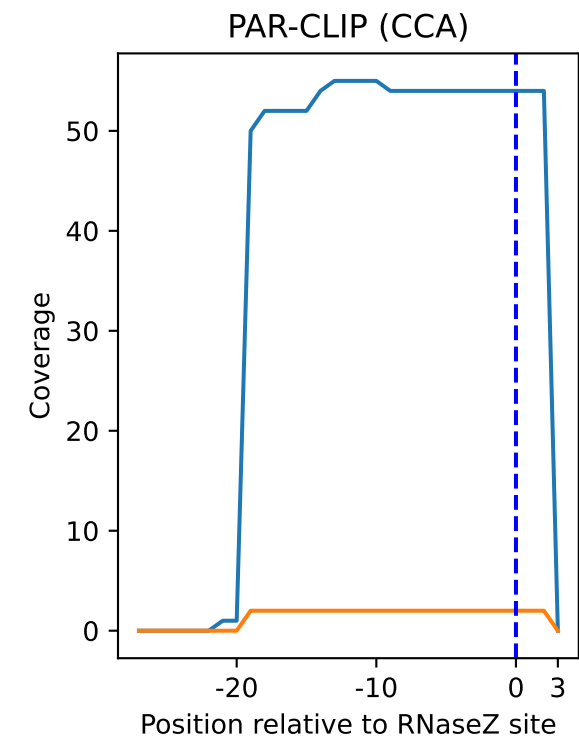



# tRNA-Cys-GCA-2-1

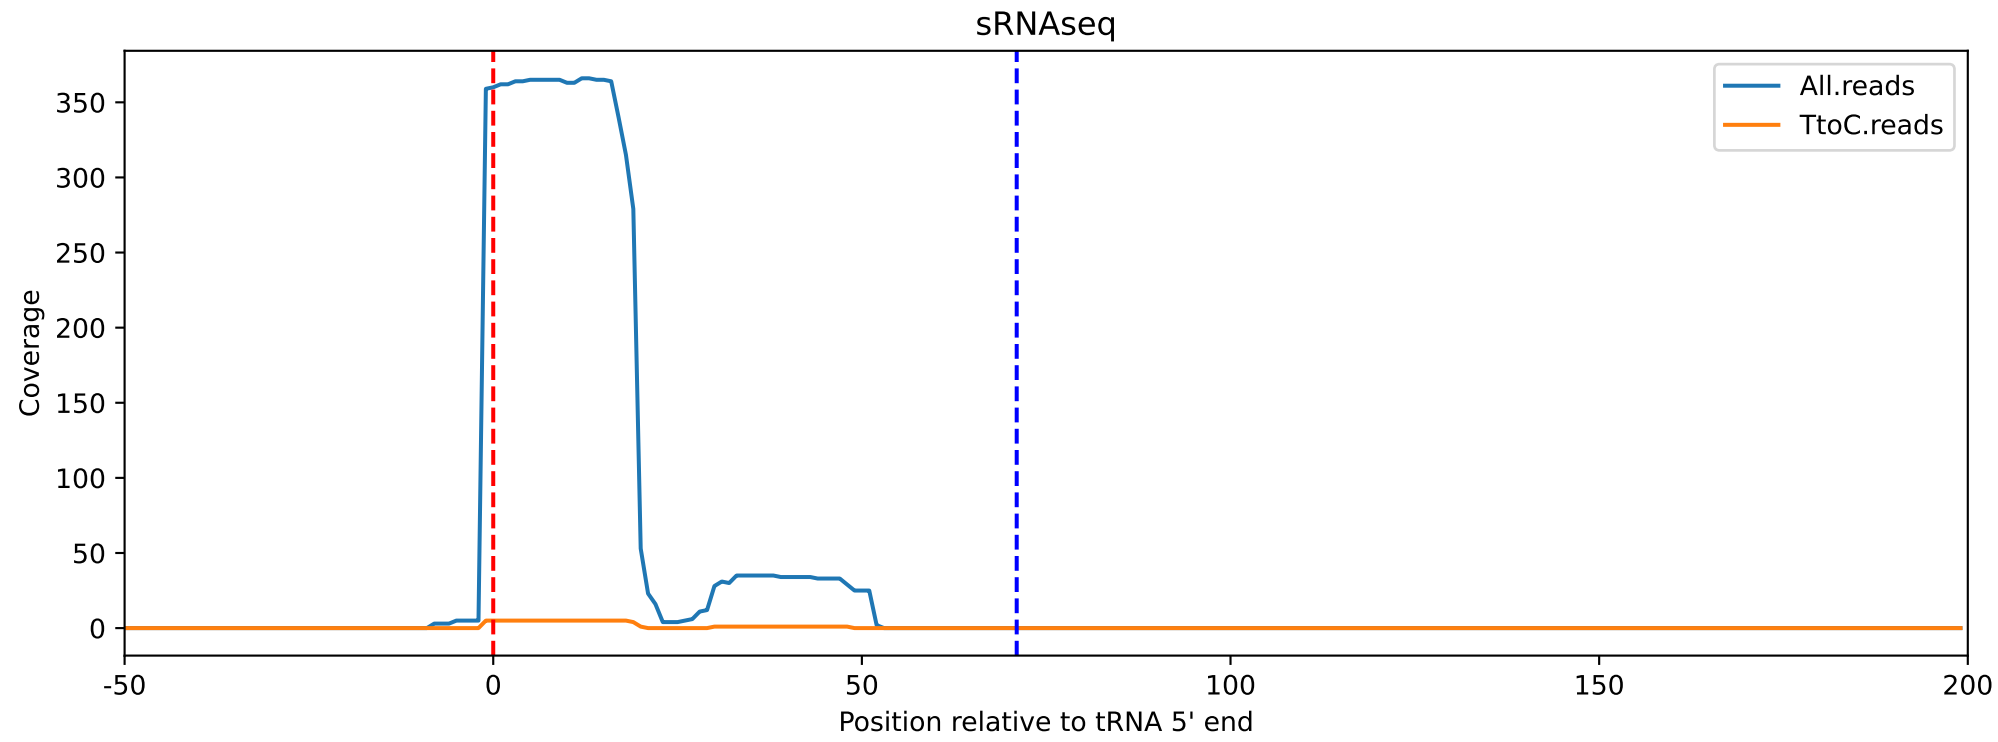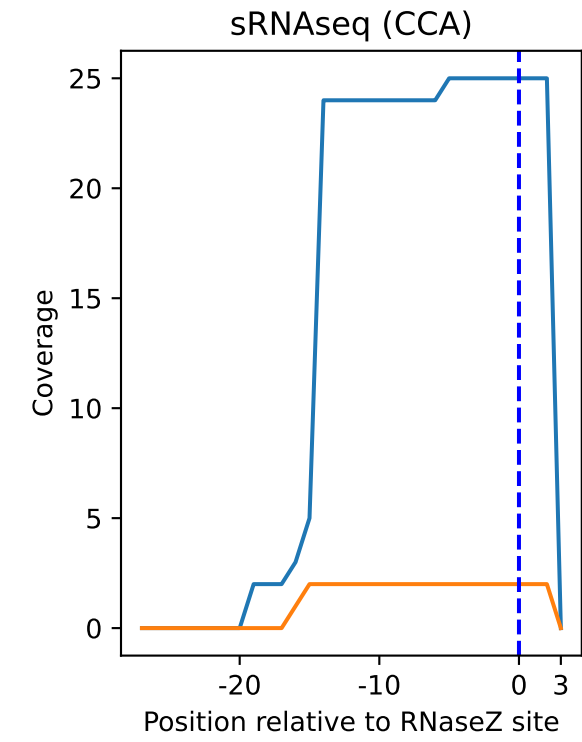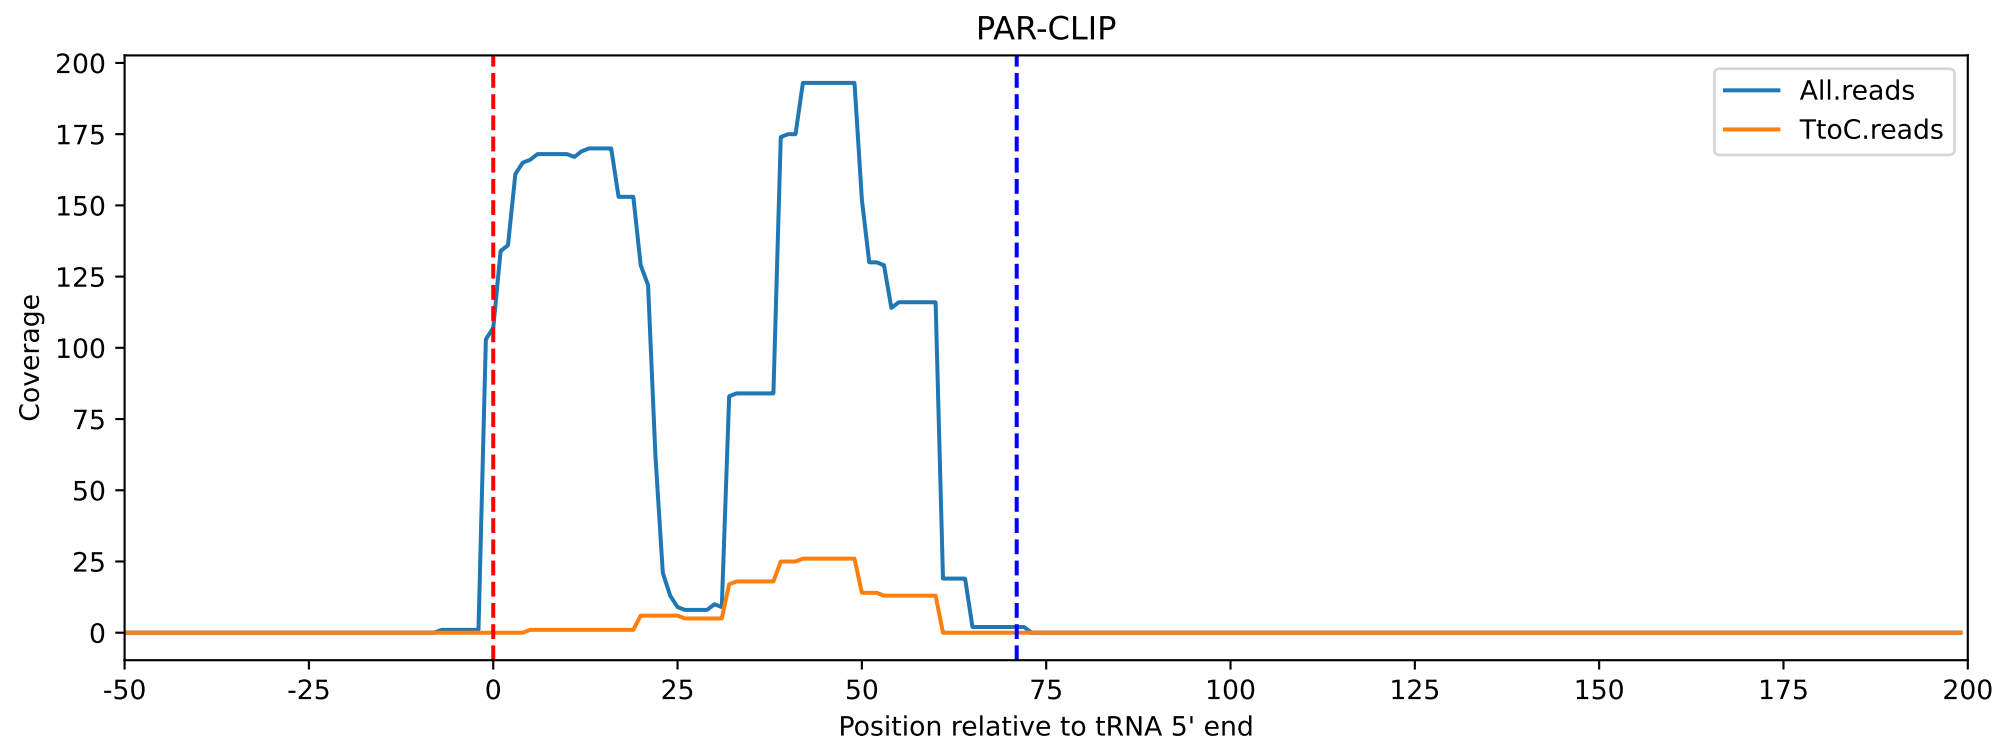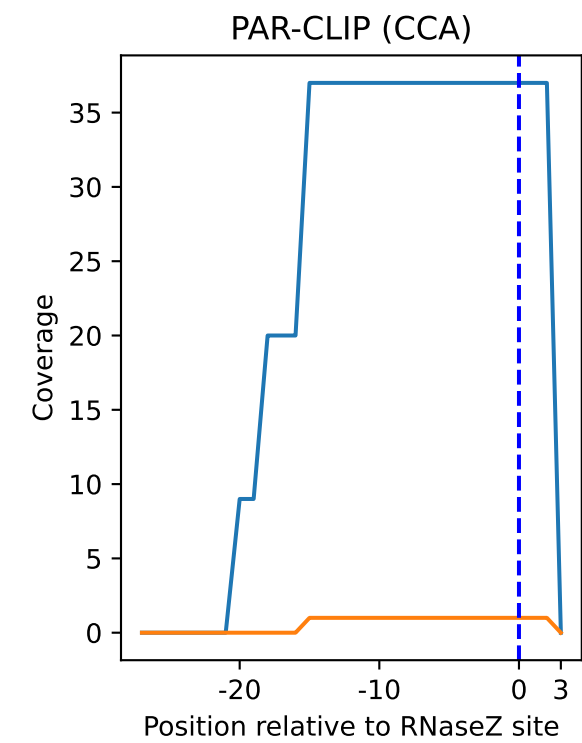

# tRNA-His-GTG-1-4

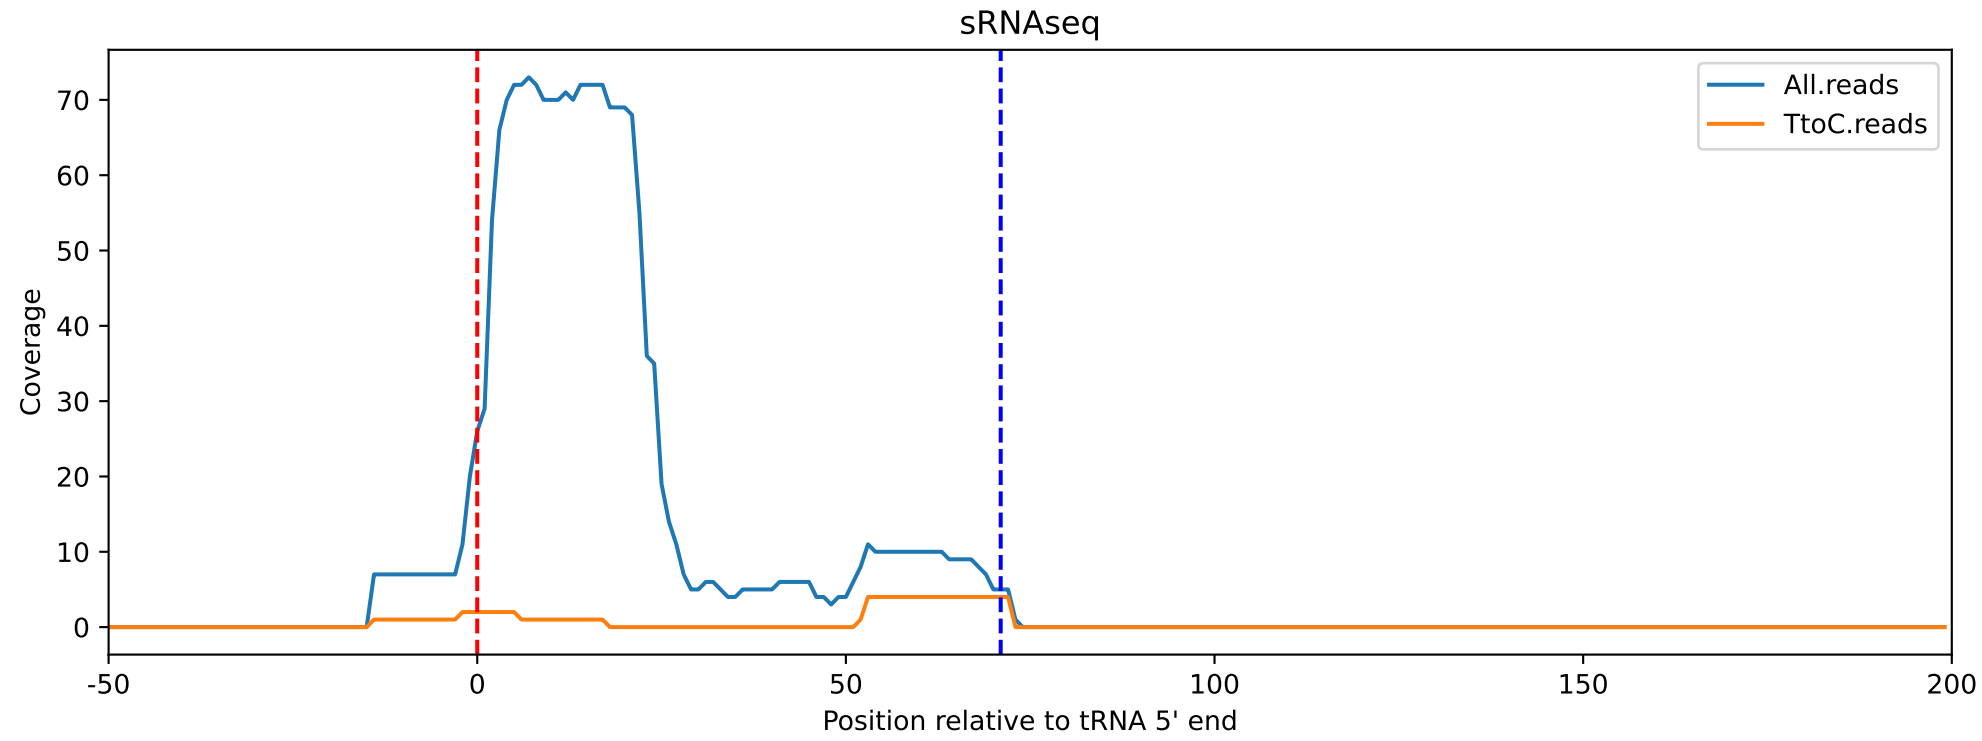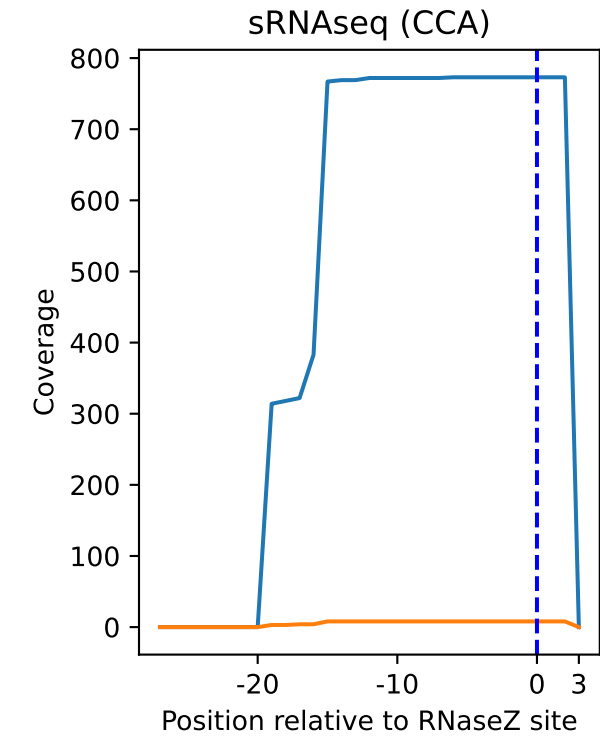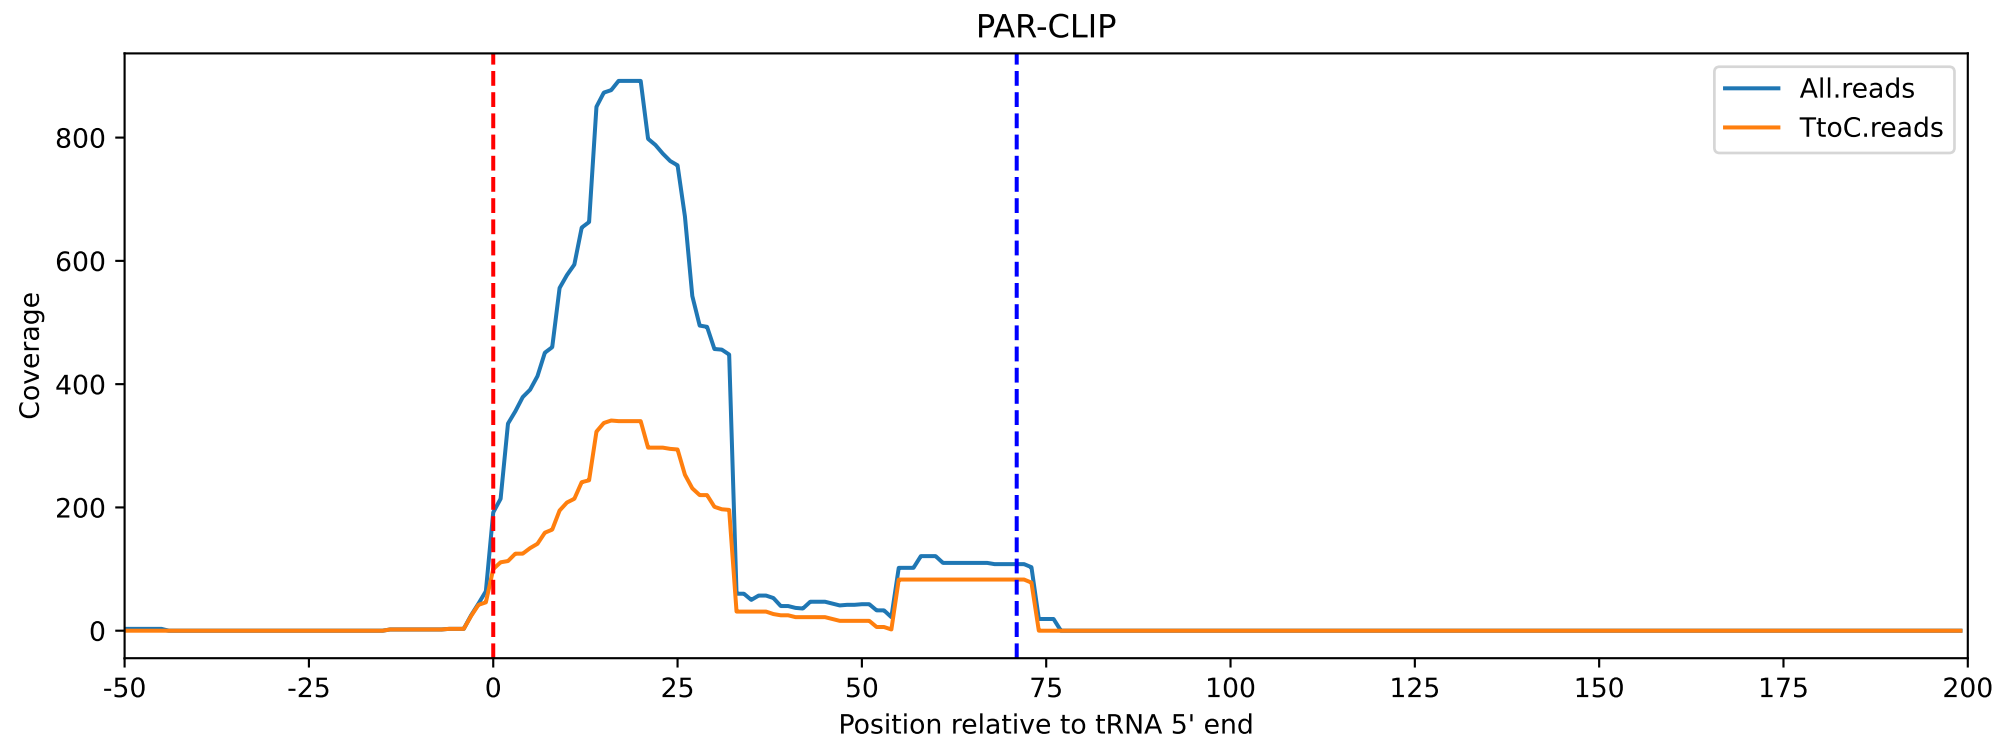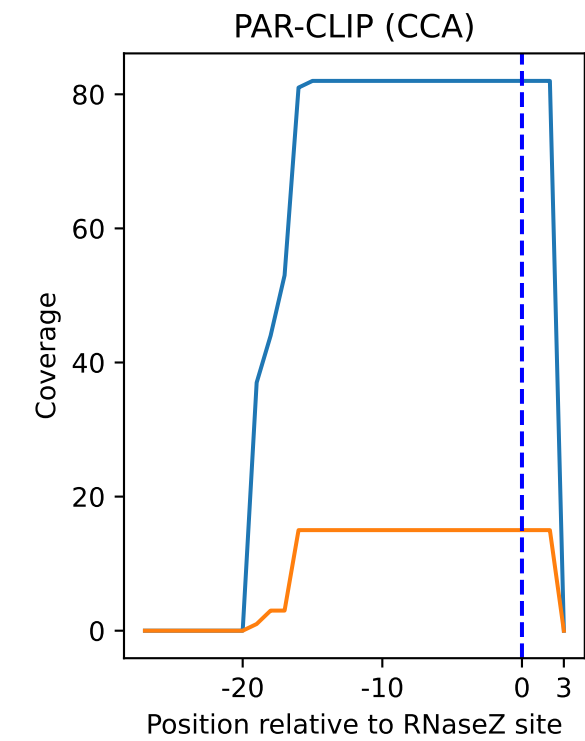

# tRNA-Ser-GCT-2-5

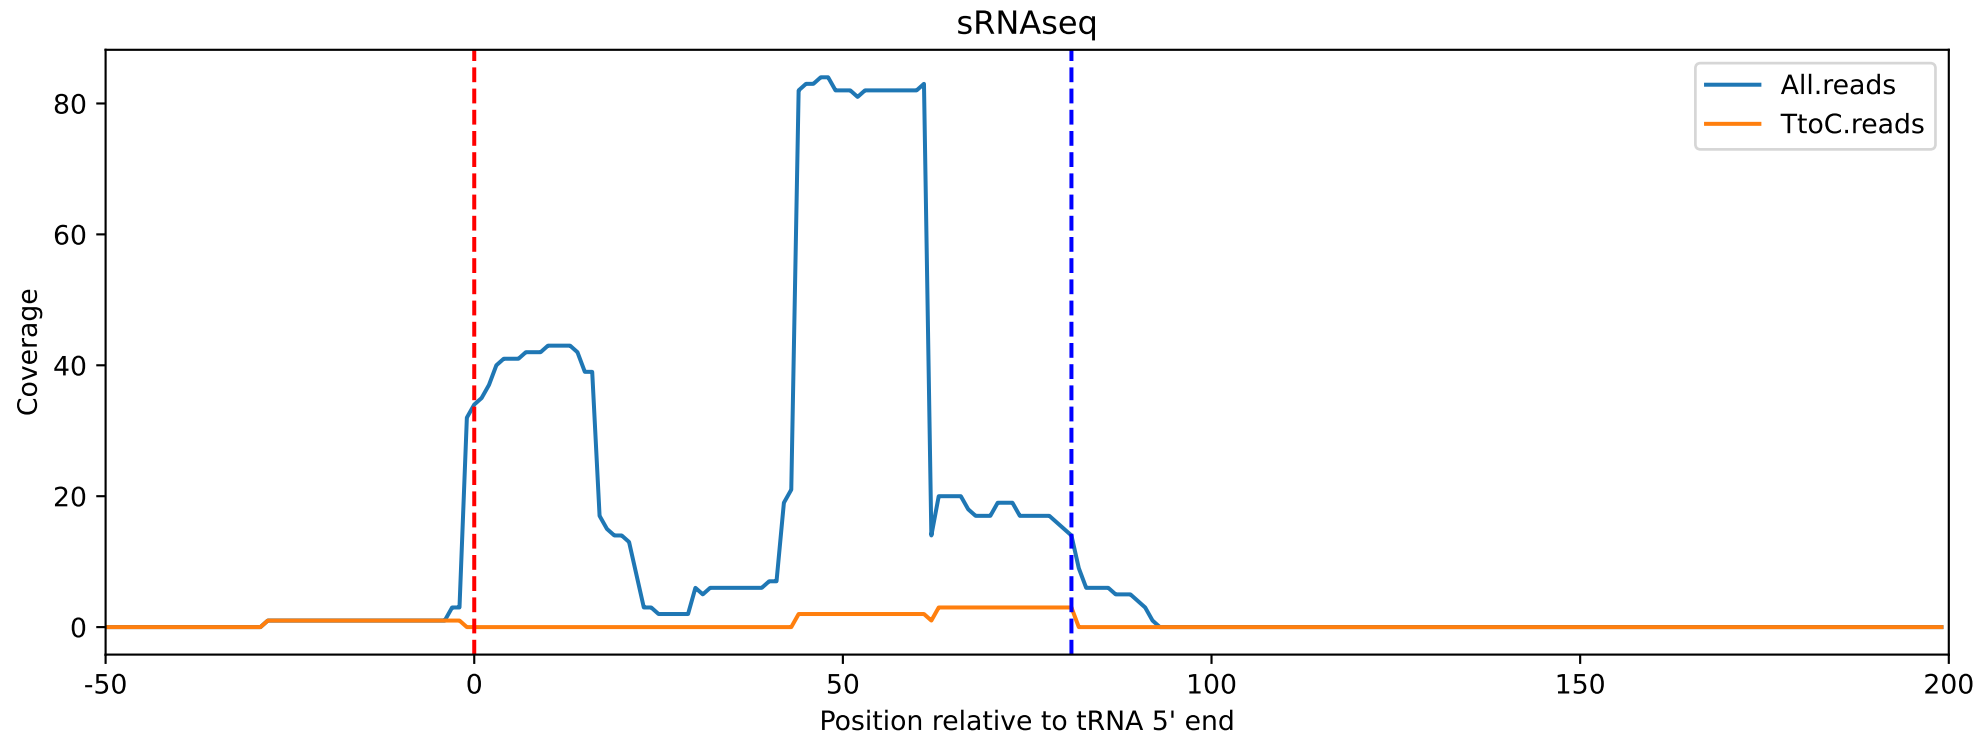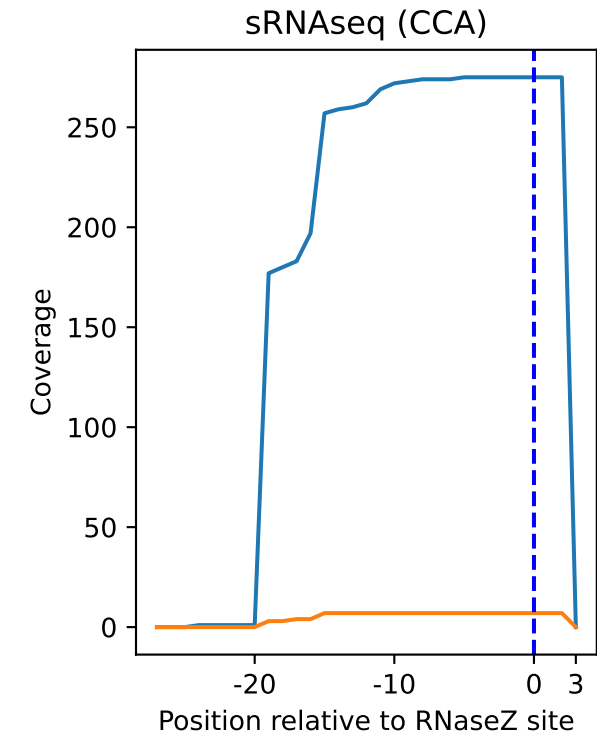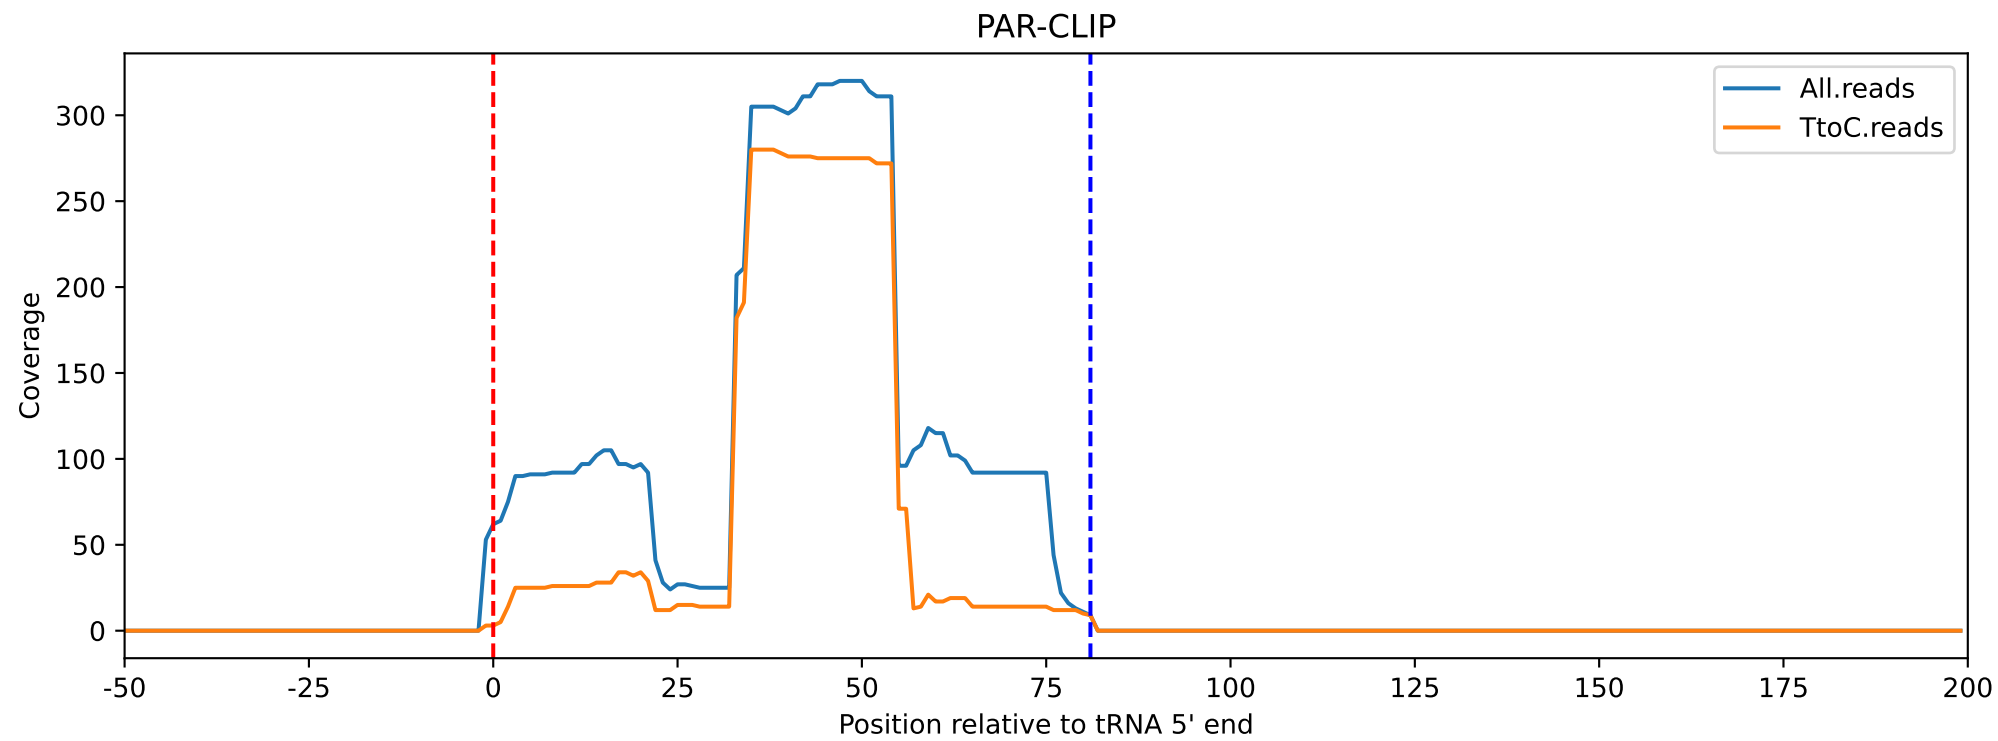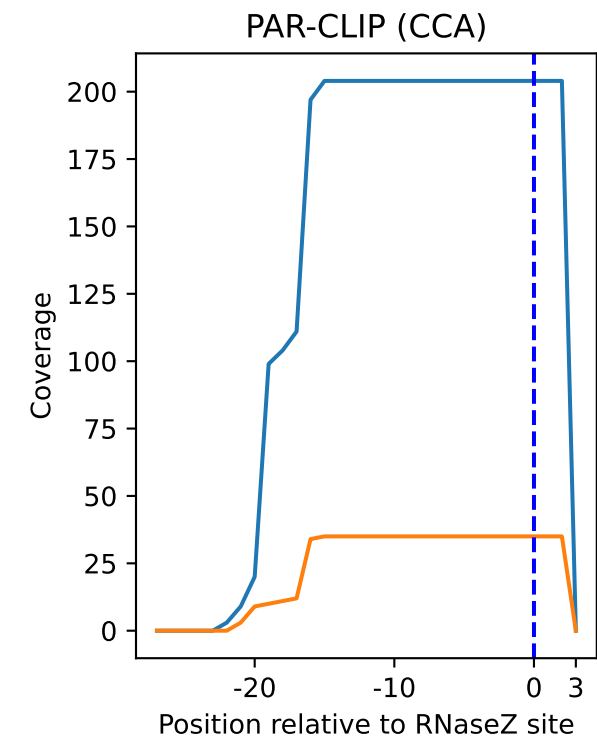

# tRNA-His-GTG-2-1

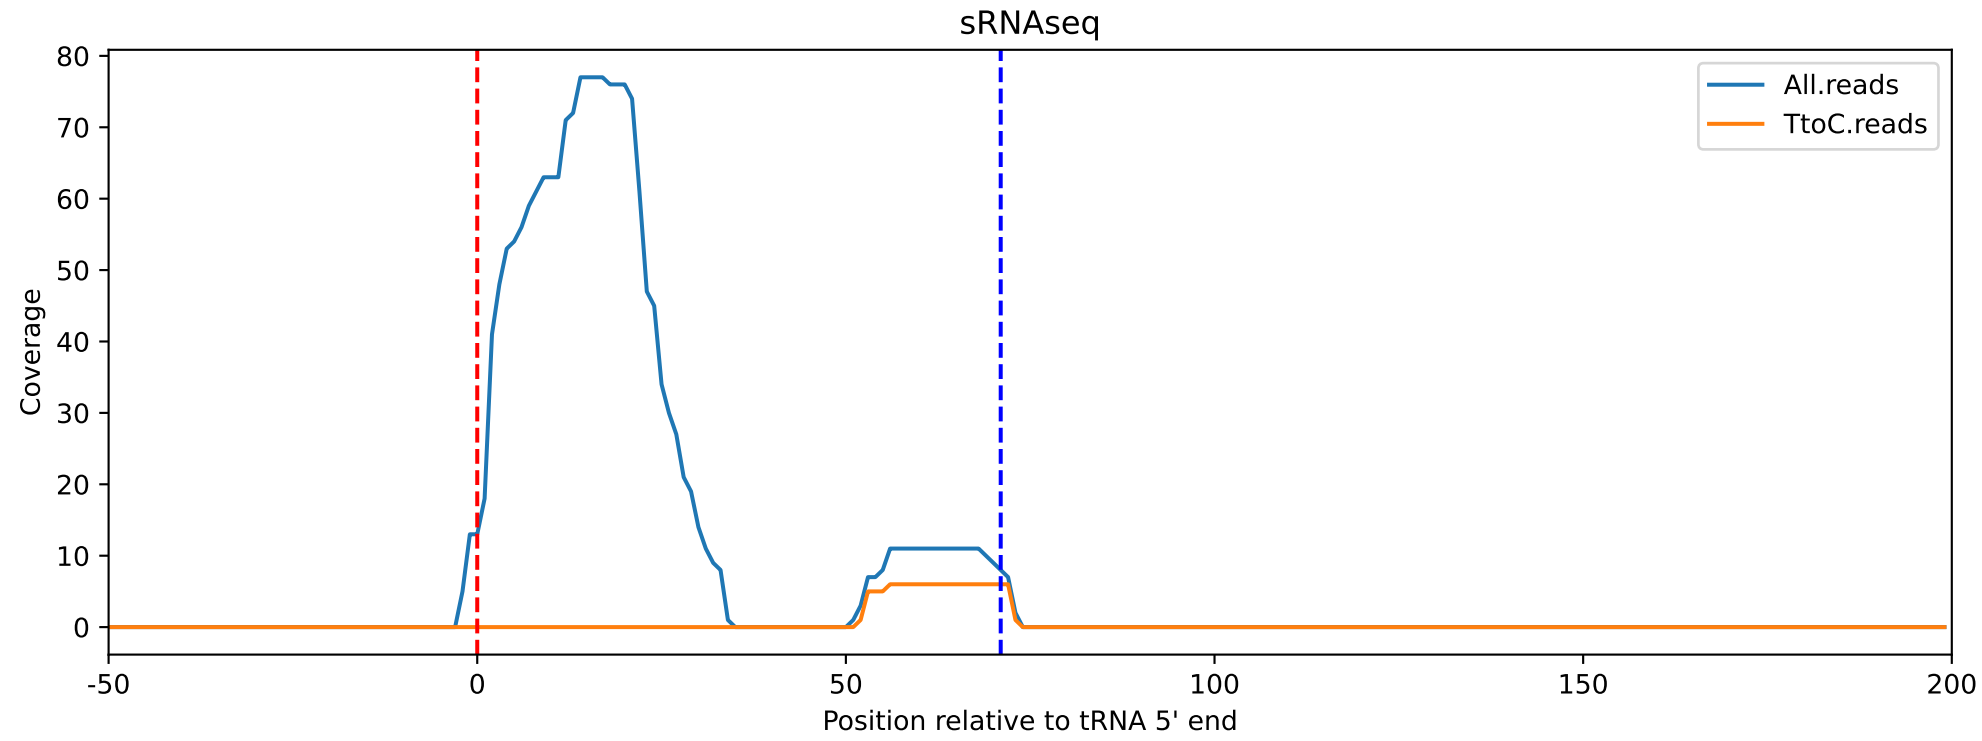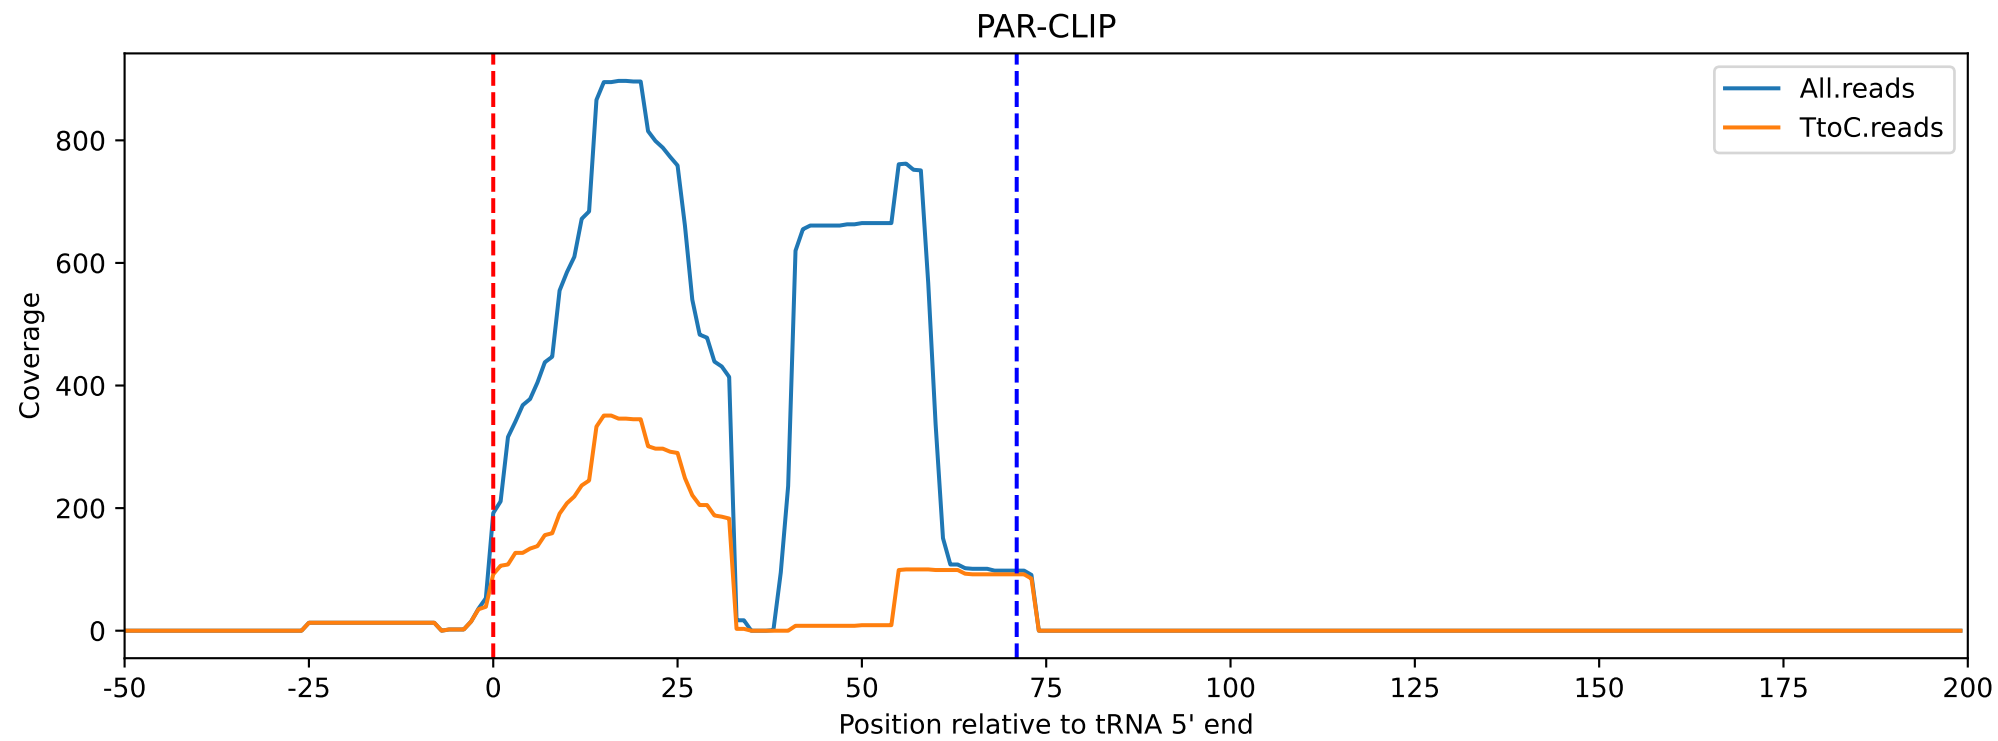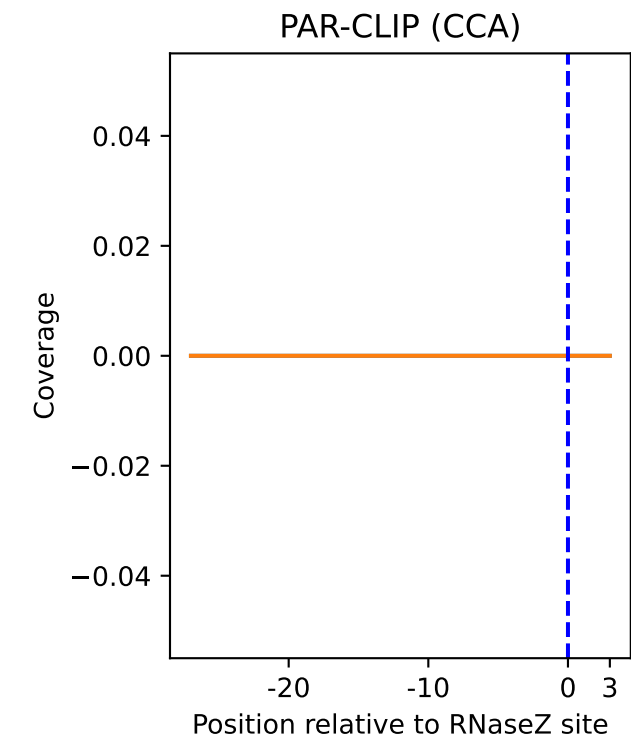

# tRNA-Glu-CTC-3-5

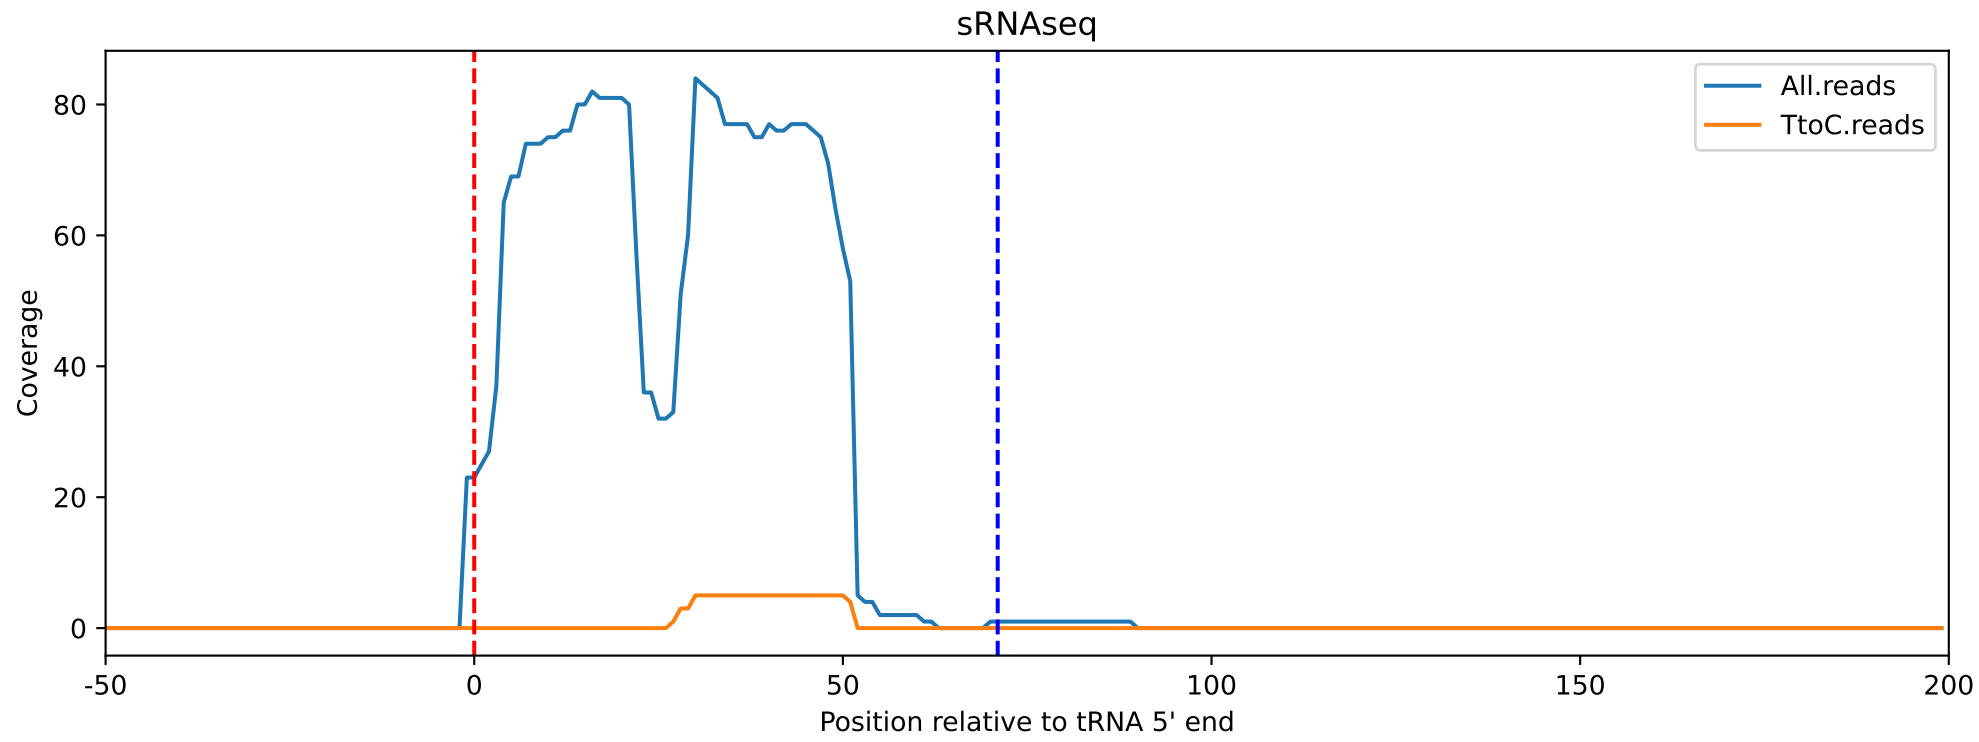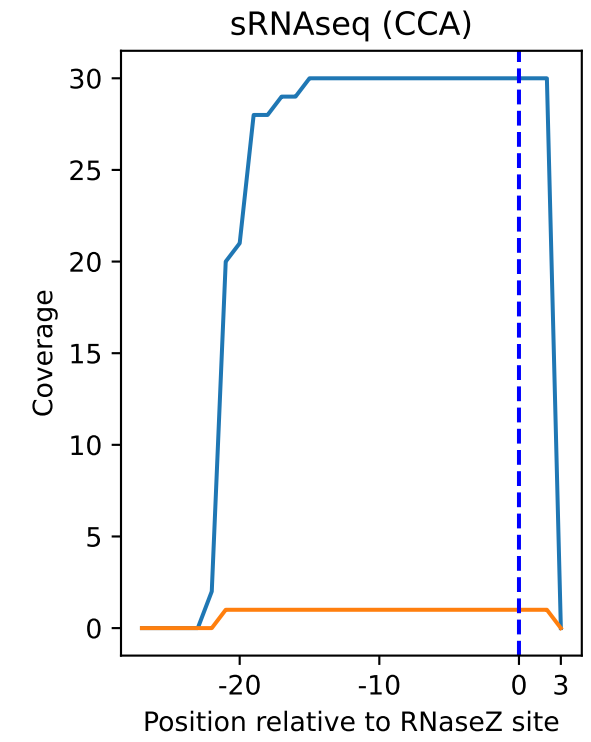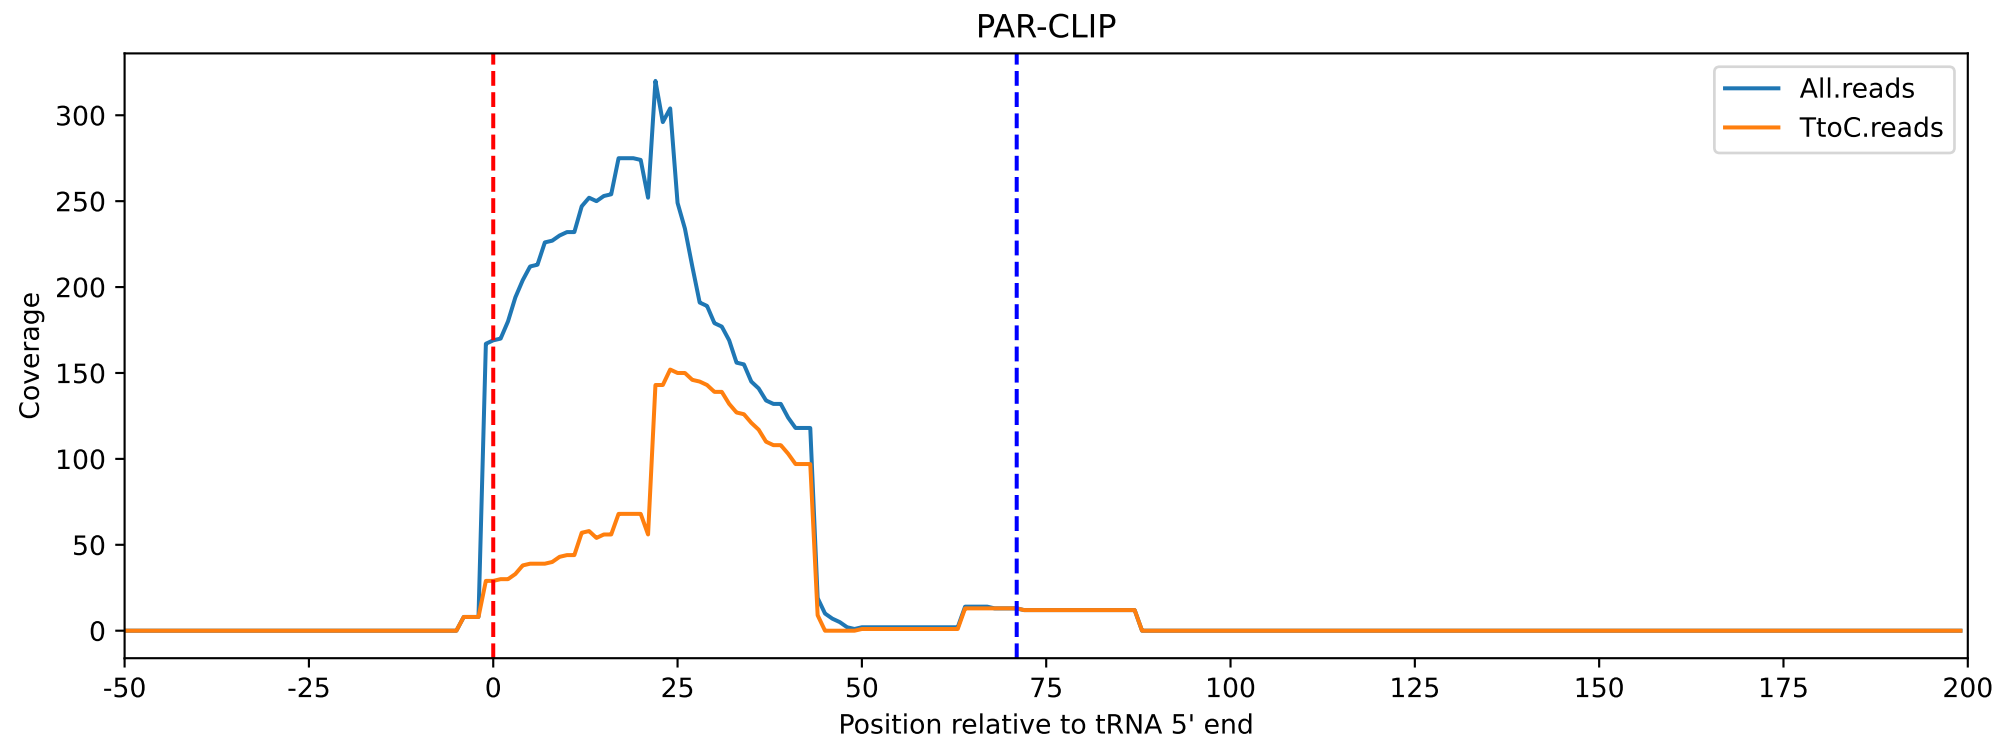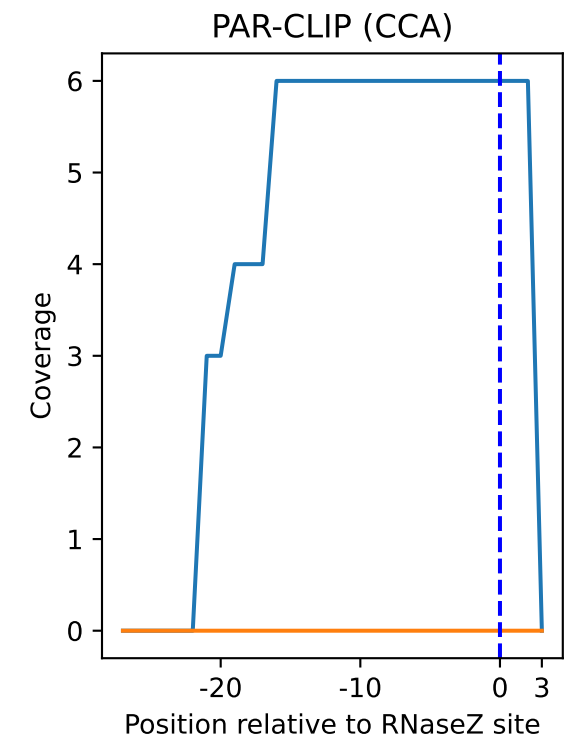

# tRNA-Glu-CTC-2-3

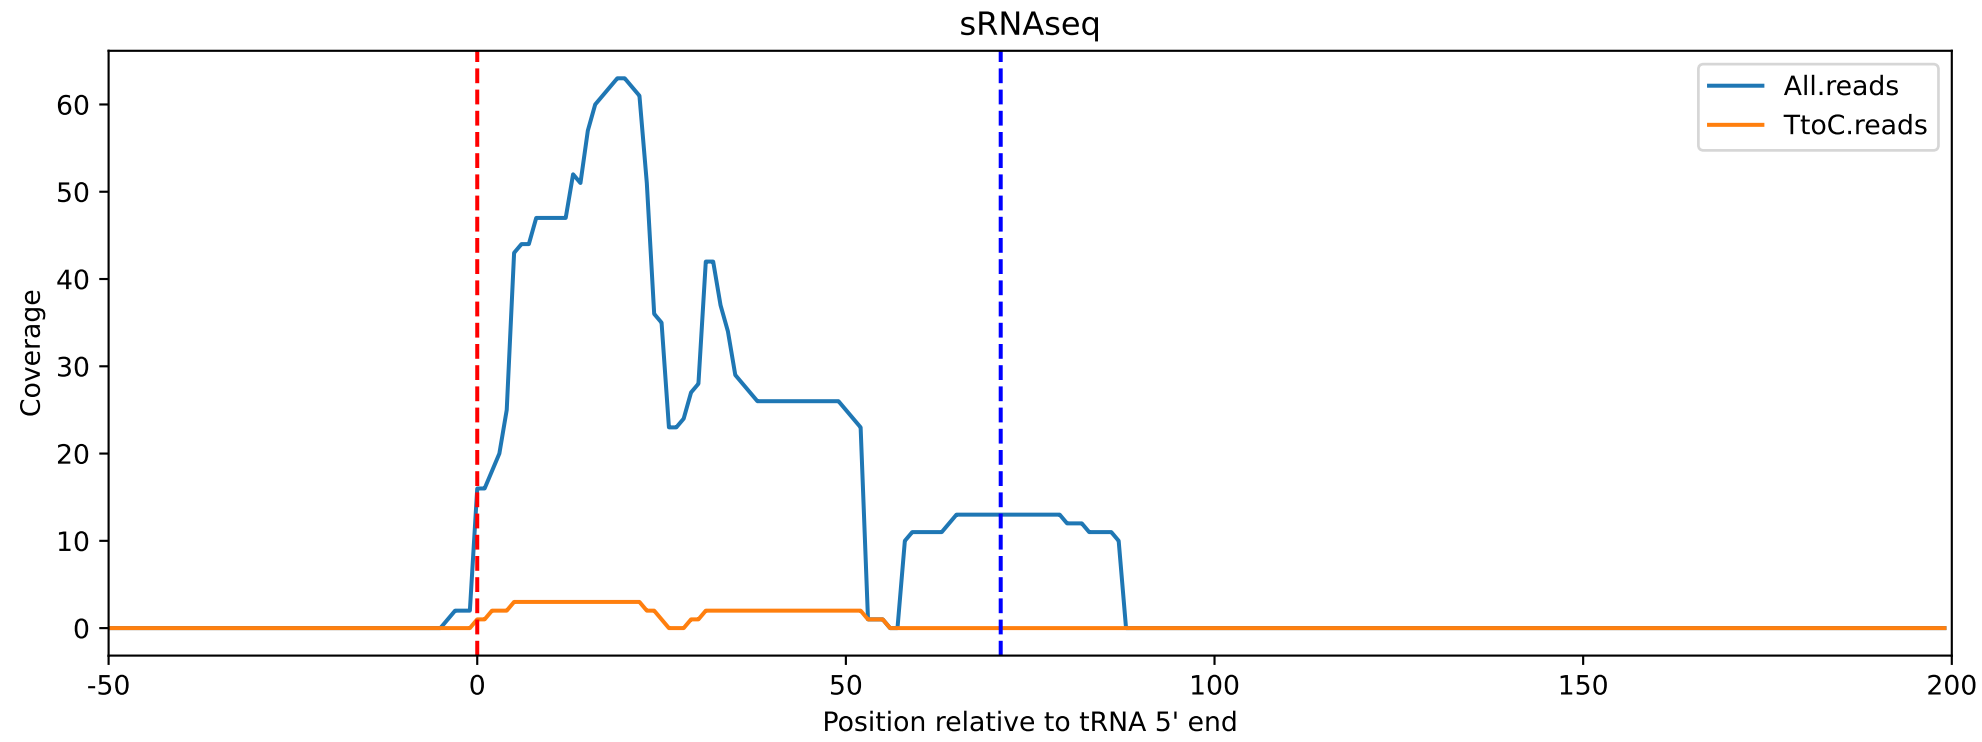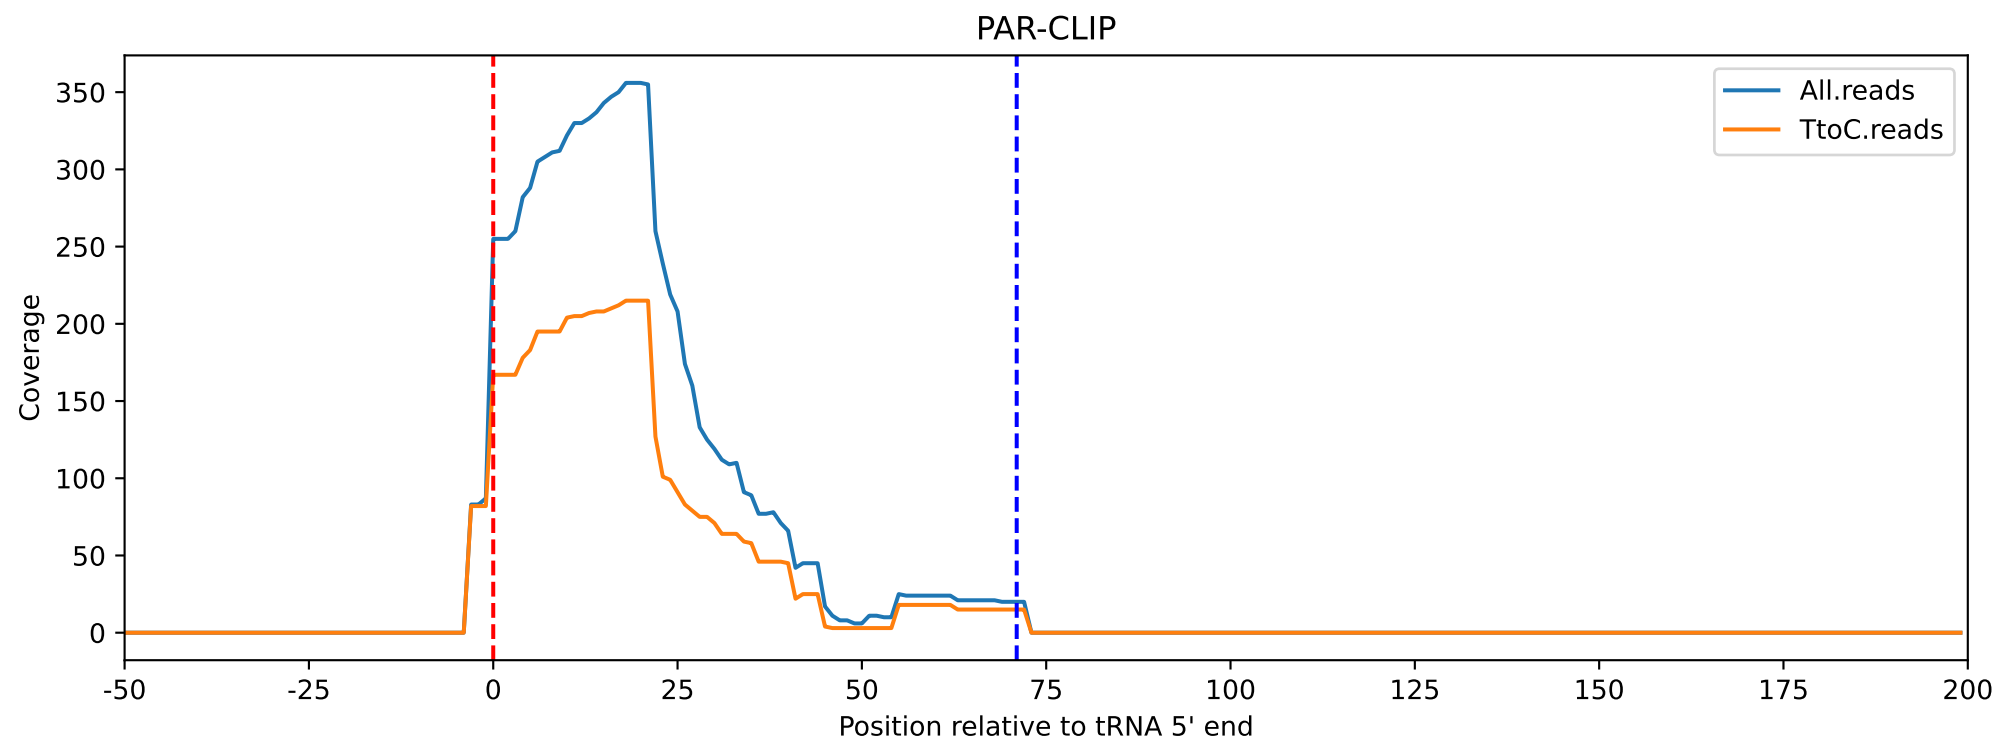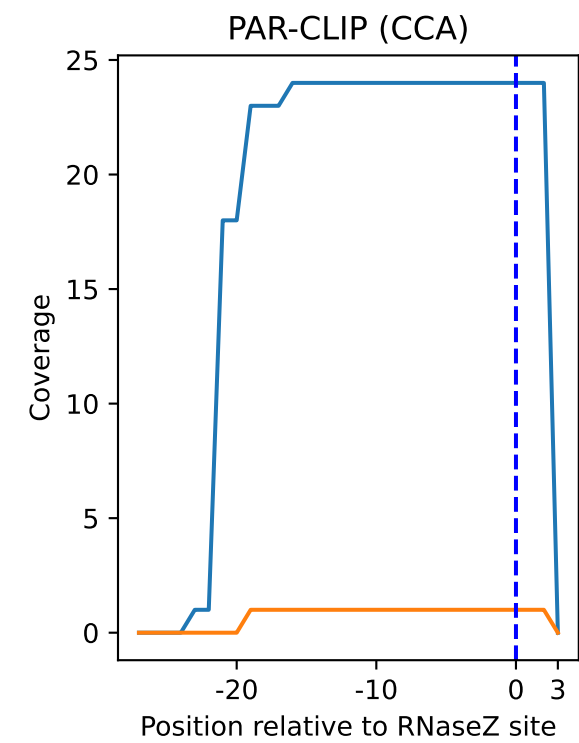

# tRNA-Ile-AAT-1-2

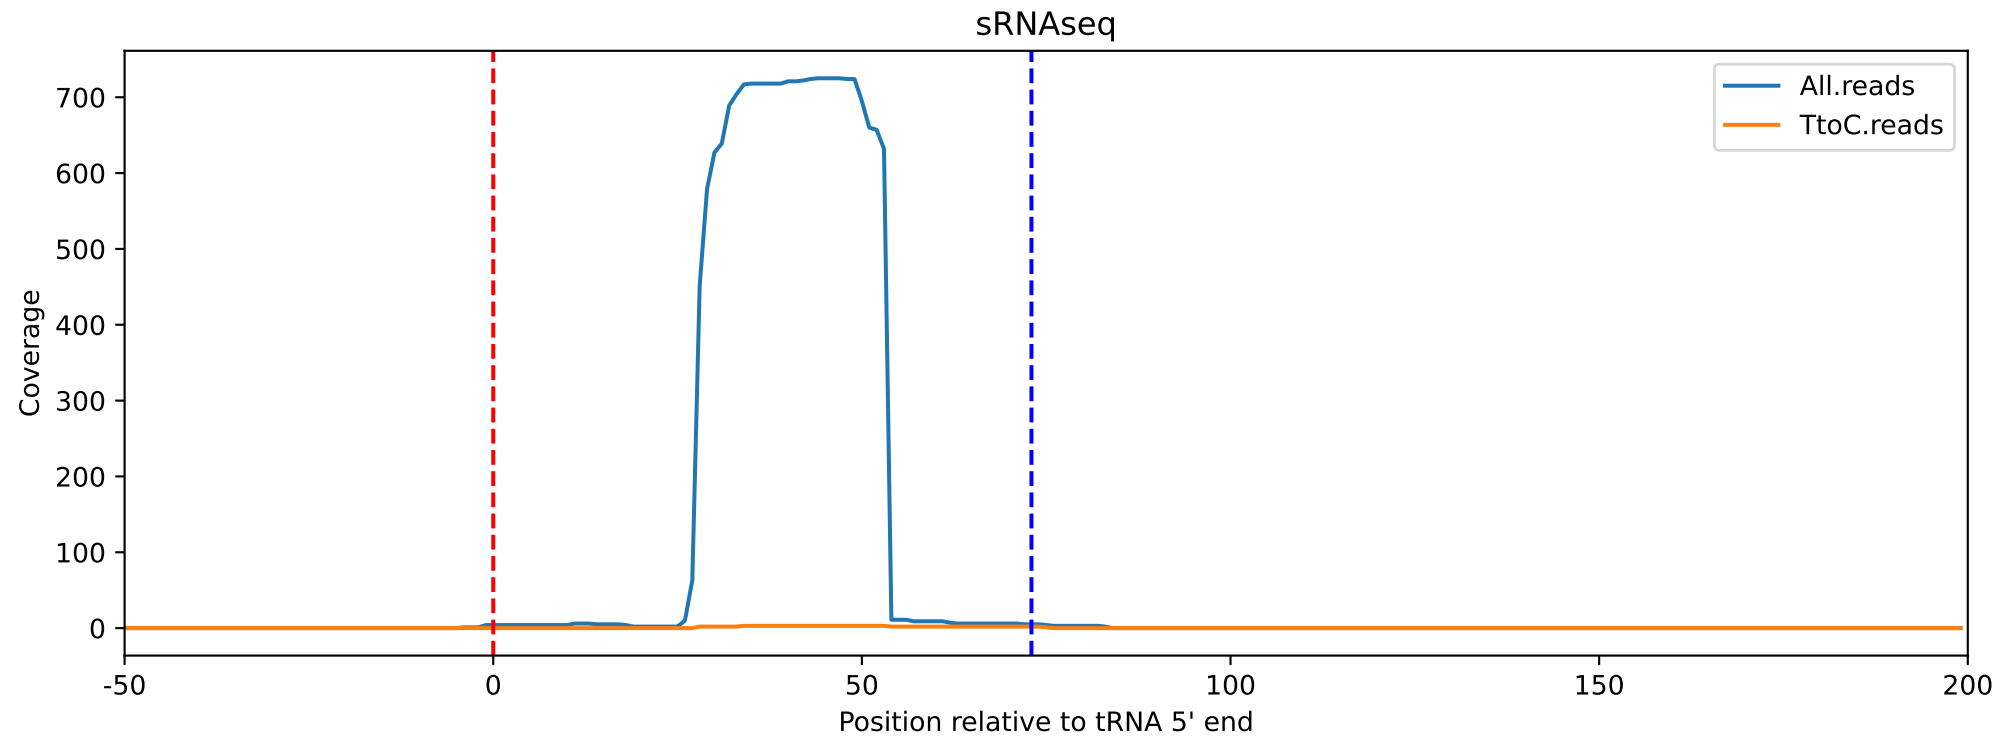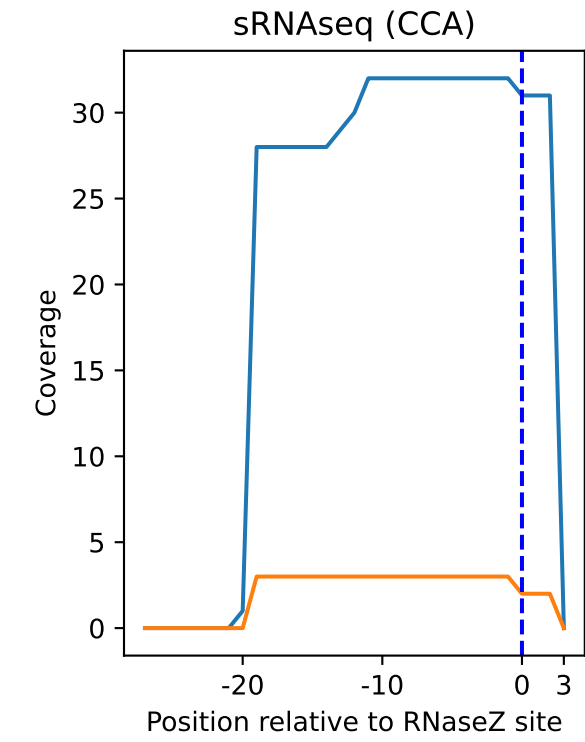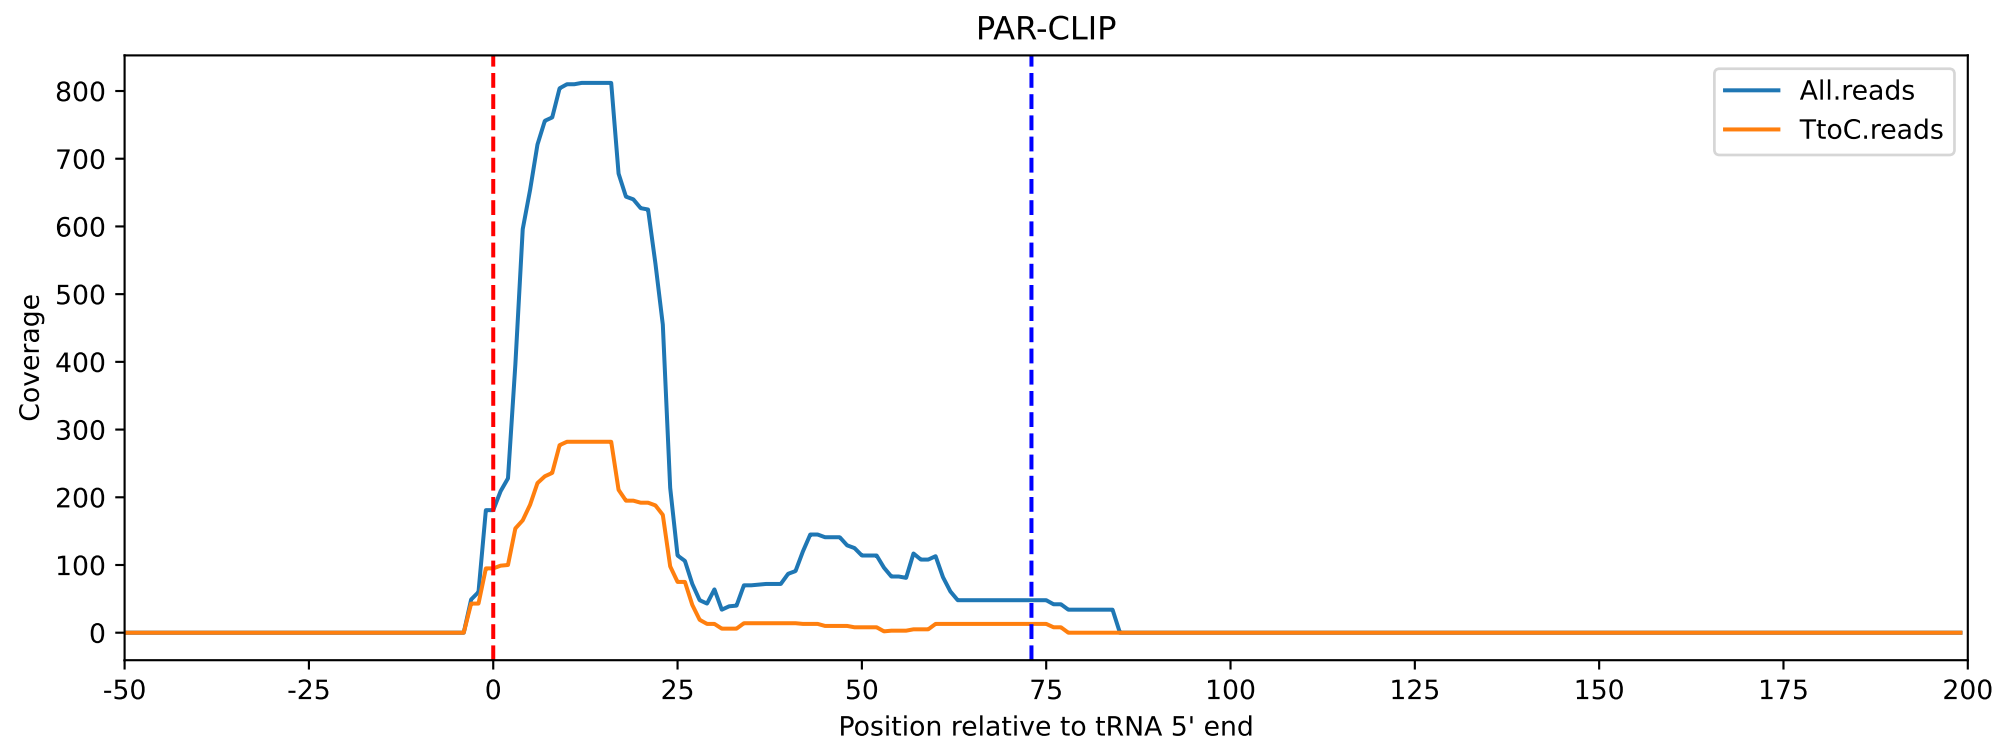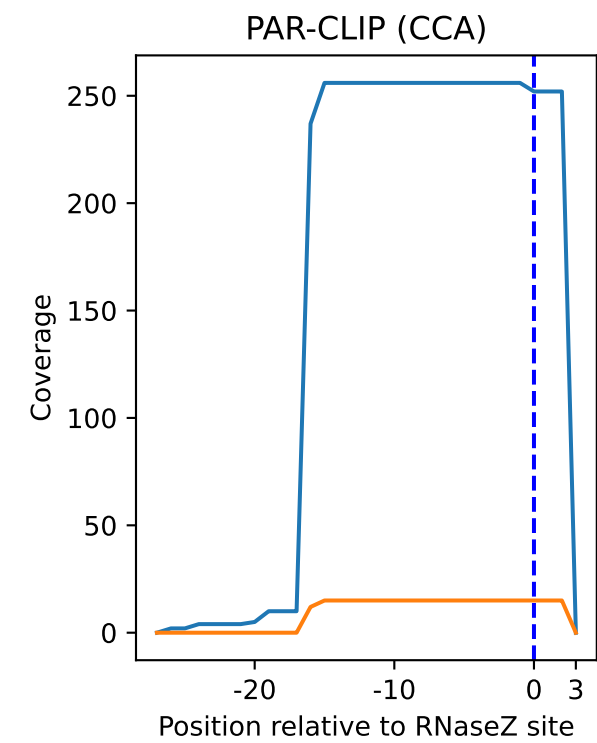

# tRNA-Glu-CTC-2-1

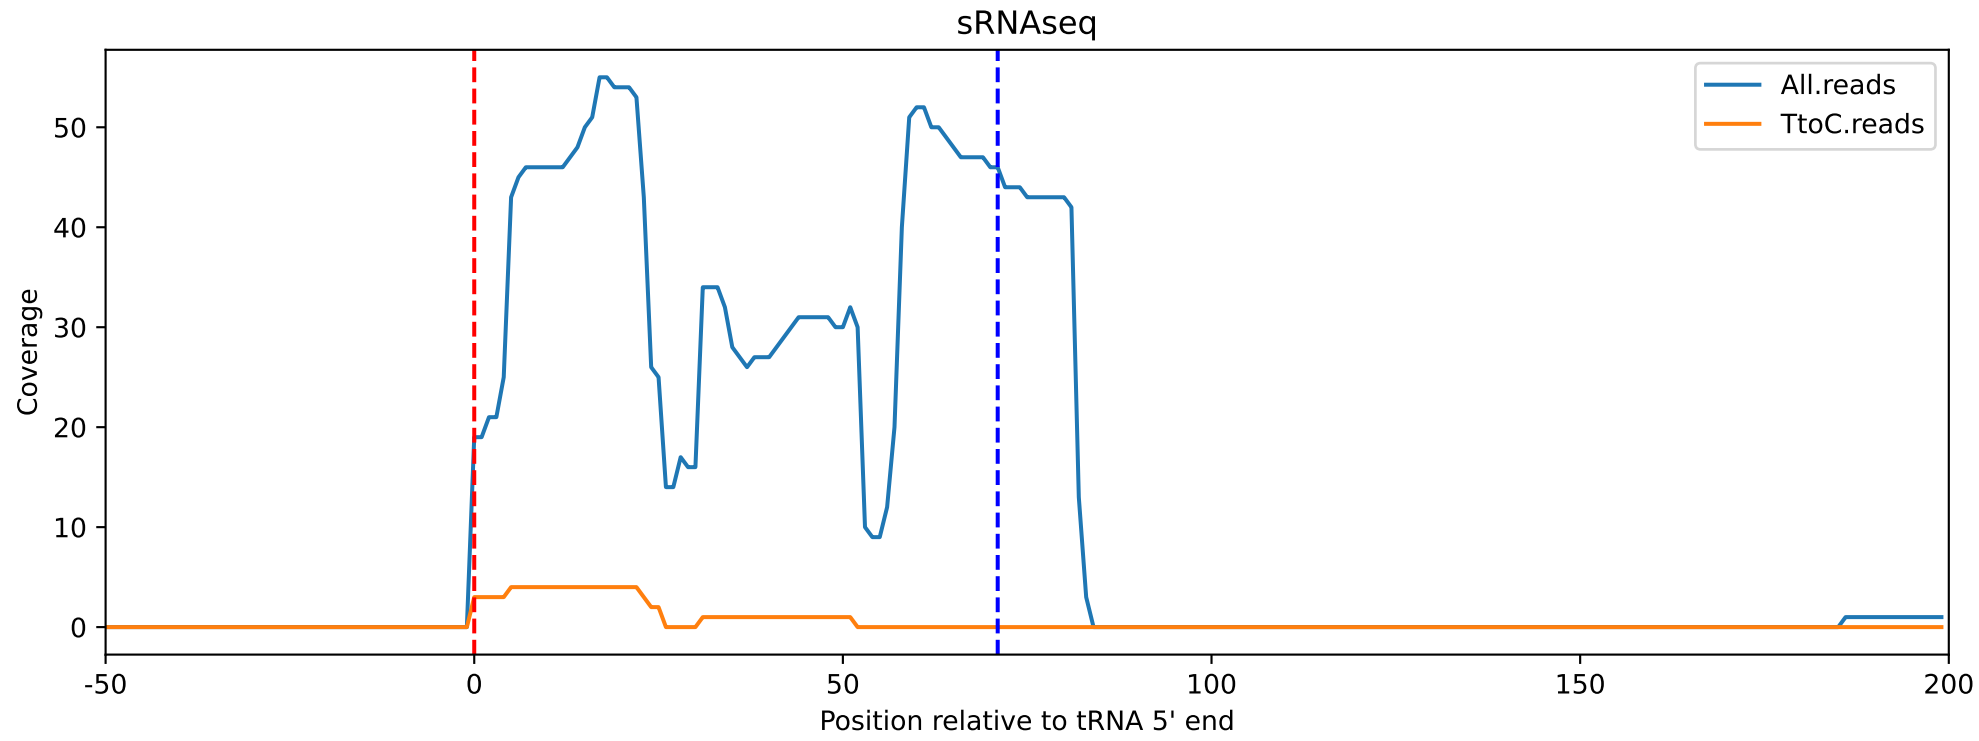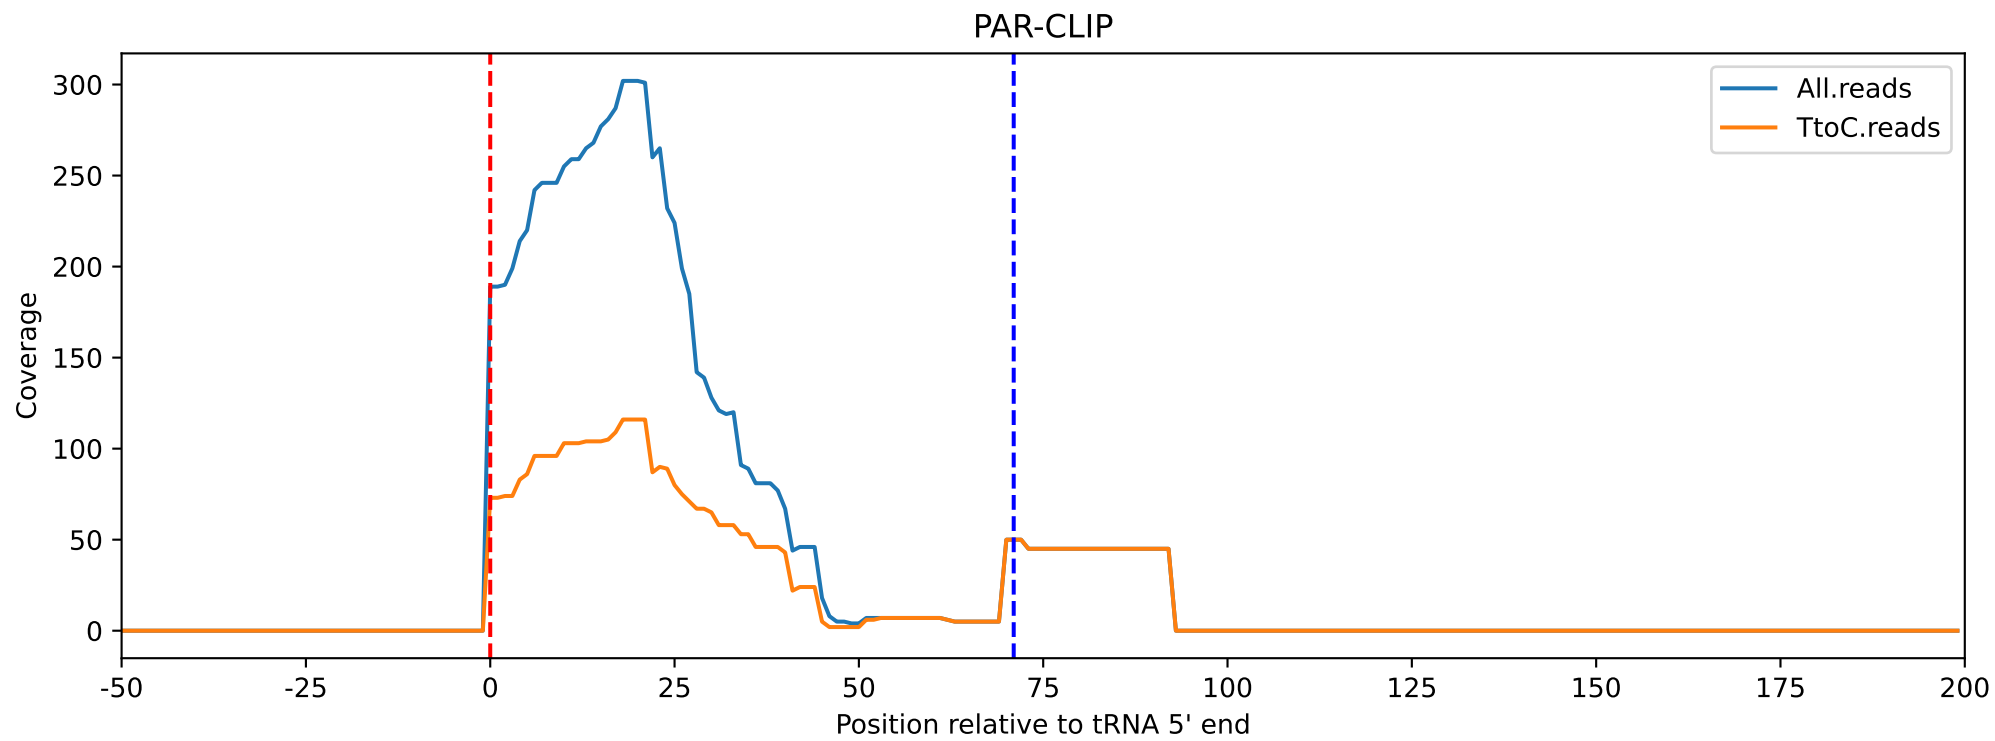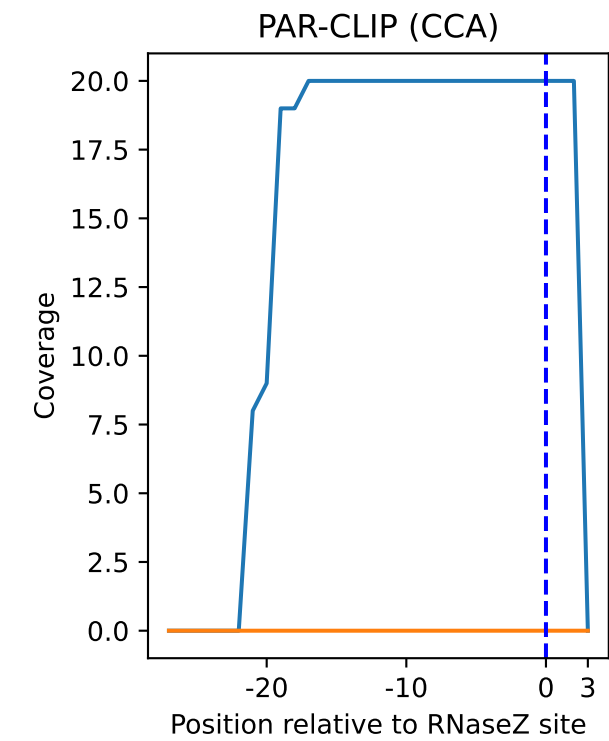



# tRNA-Thr-AGT-1-7

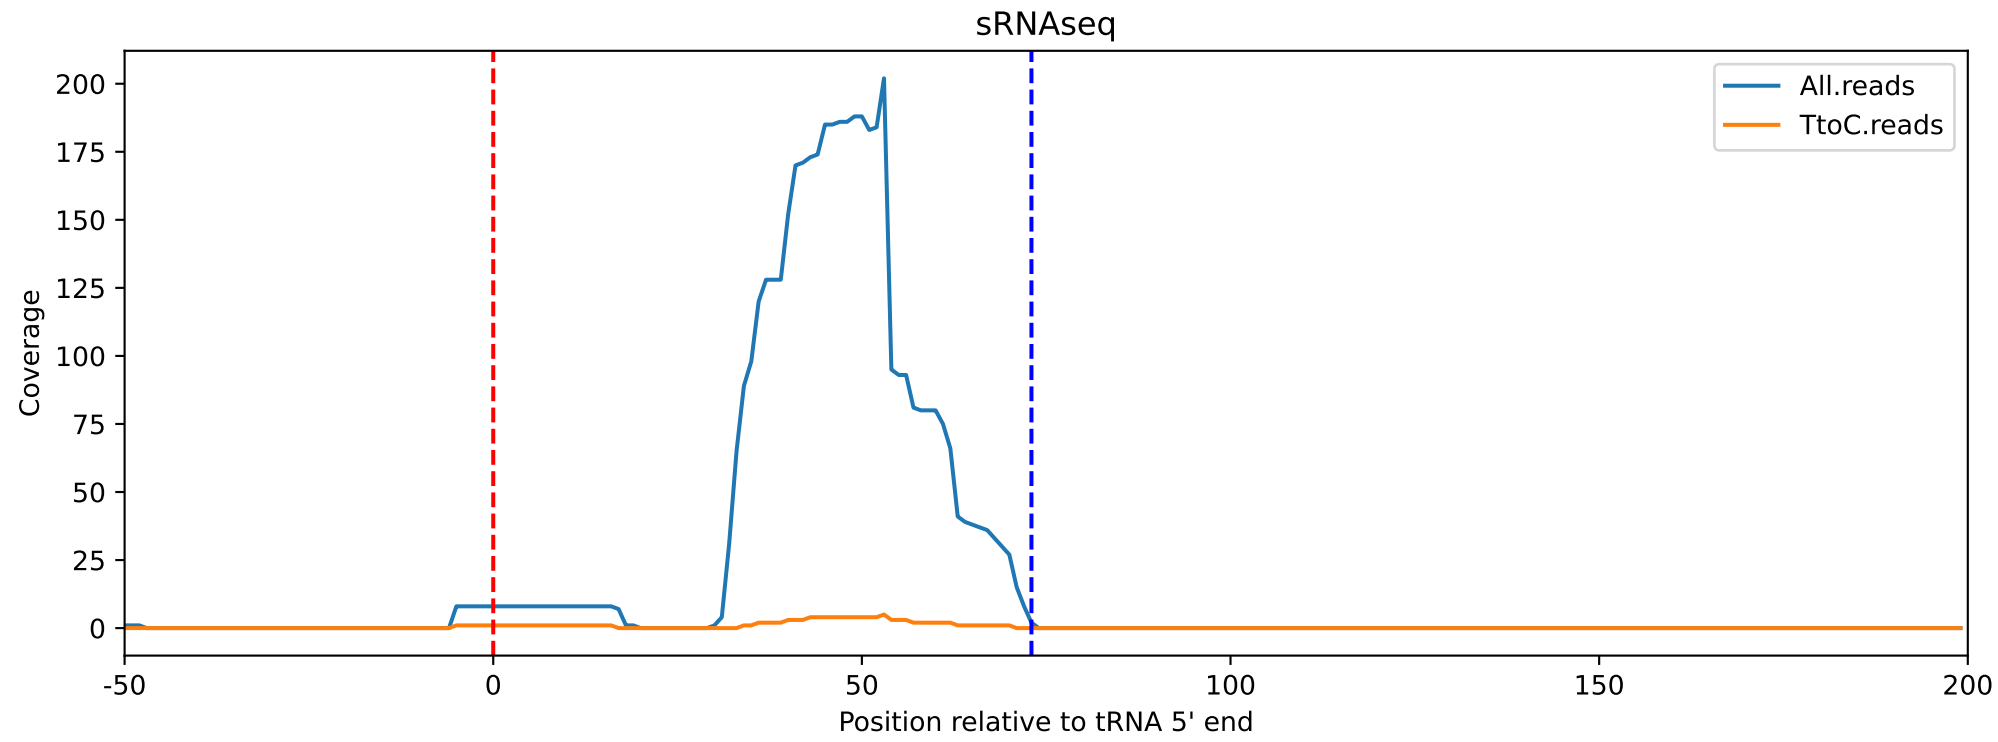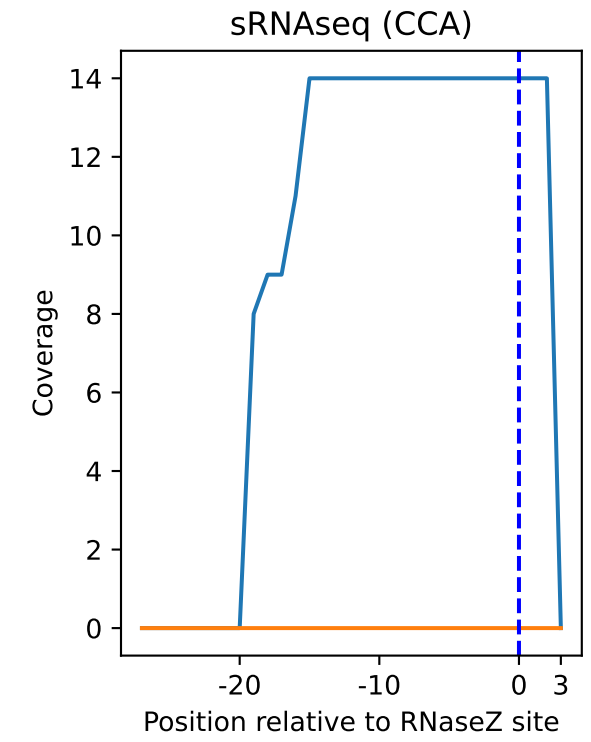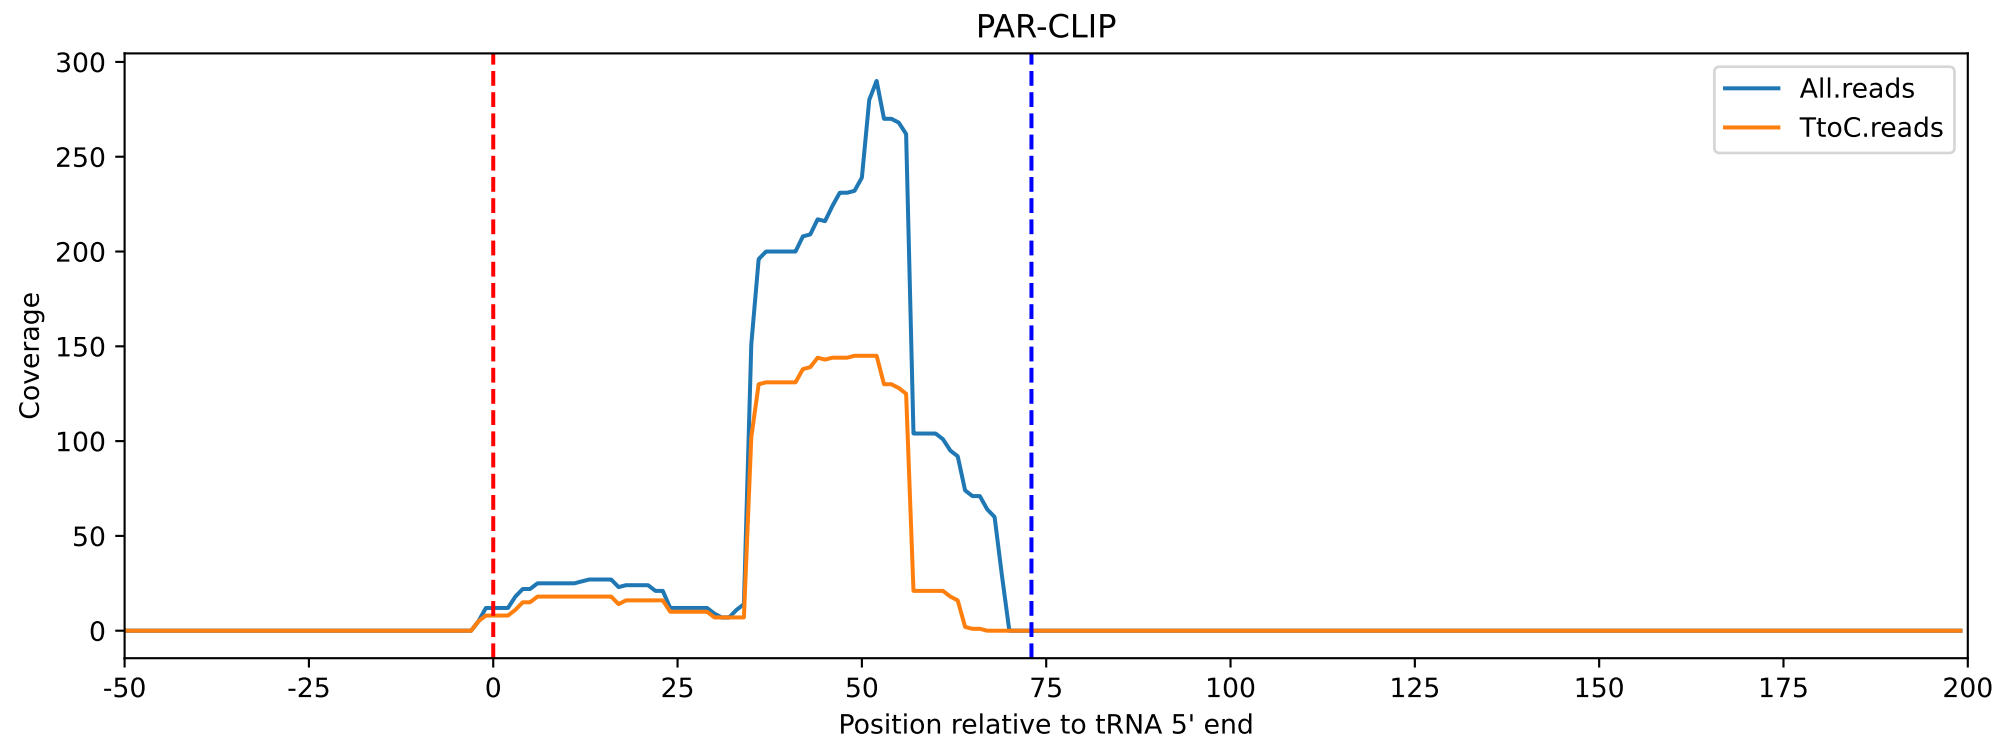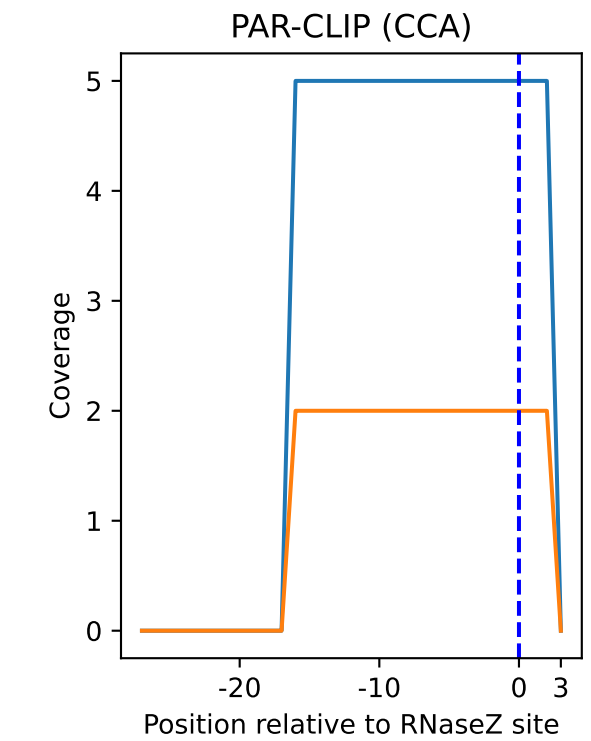

# tRNA-Ala-TGC-2-1

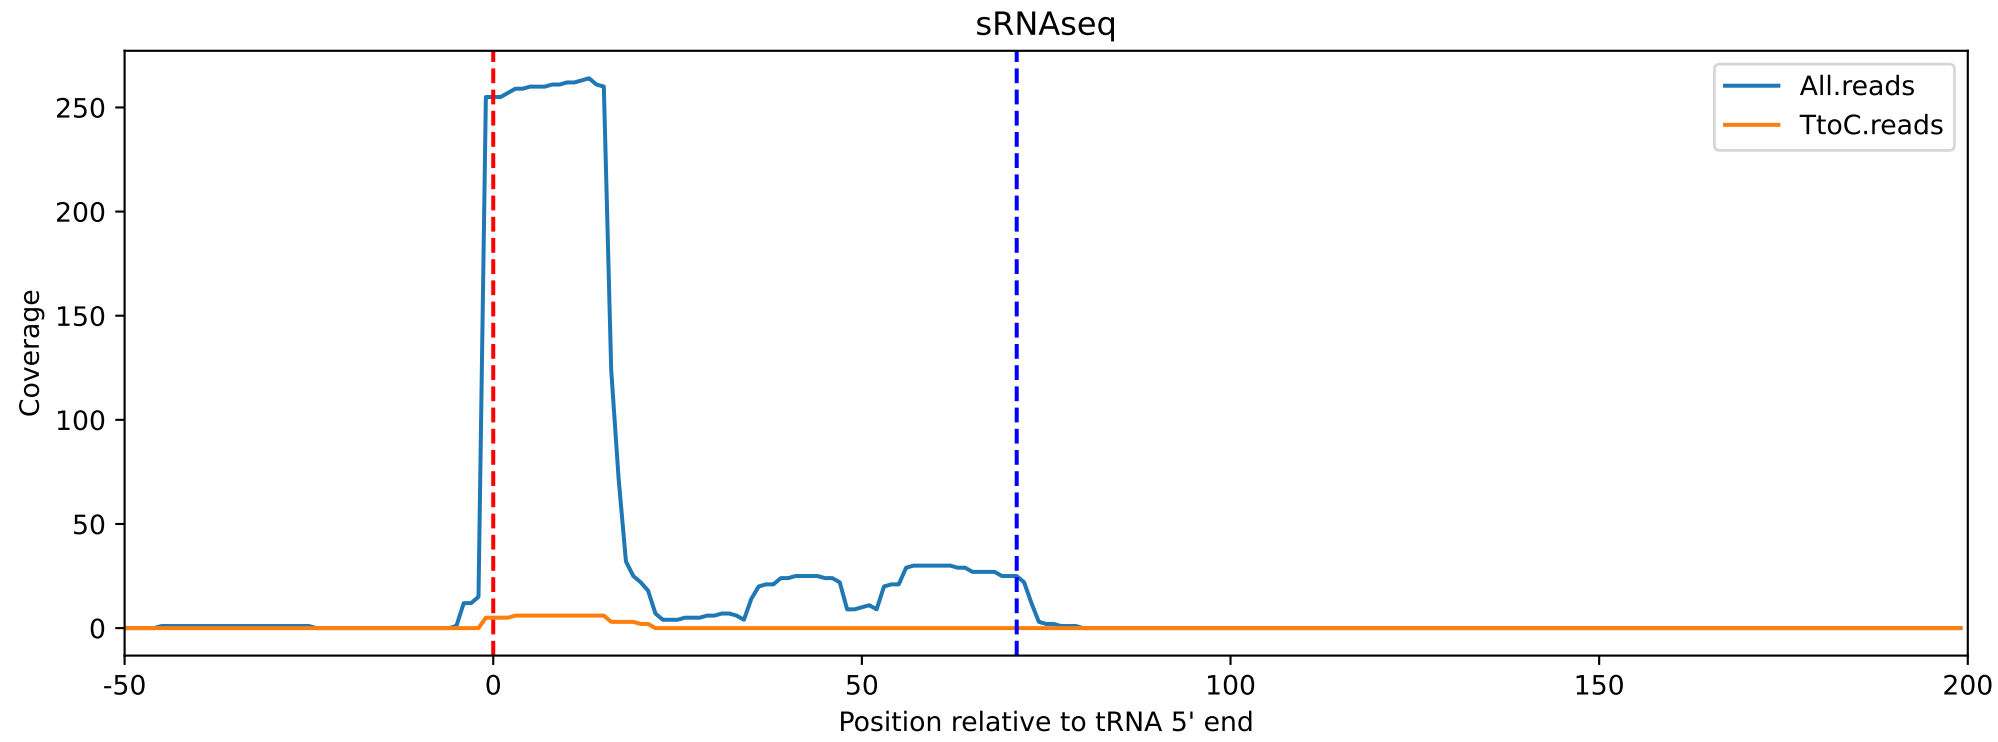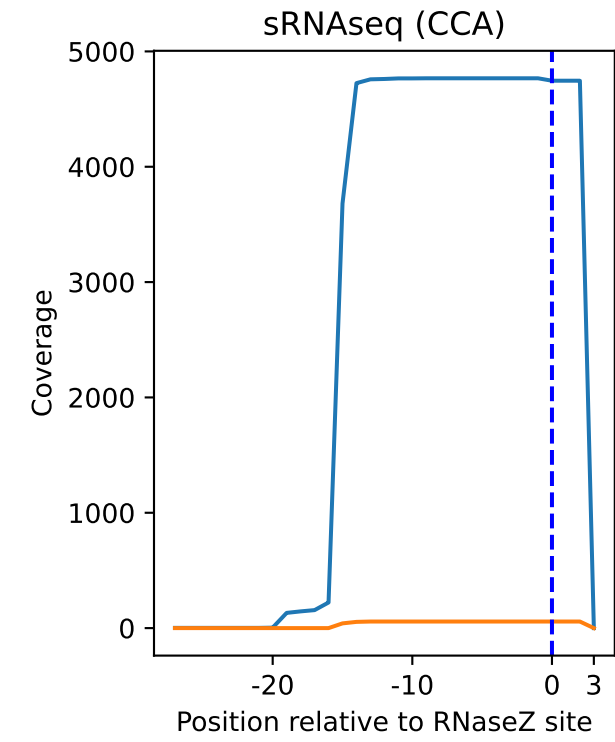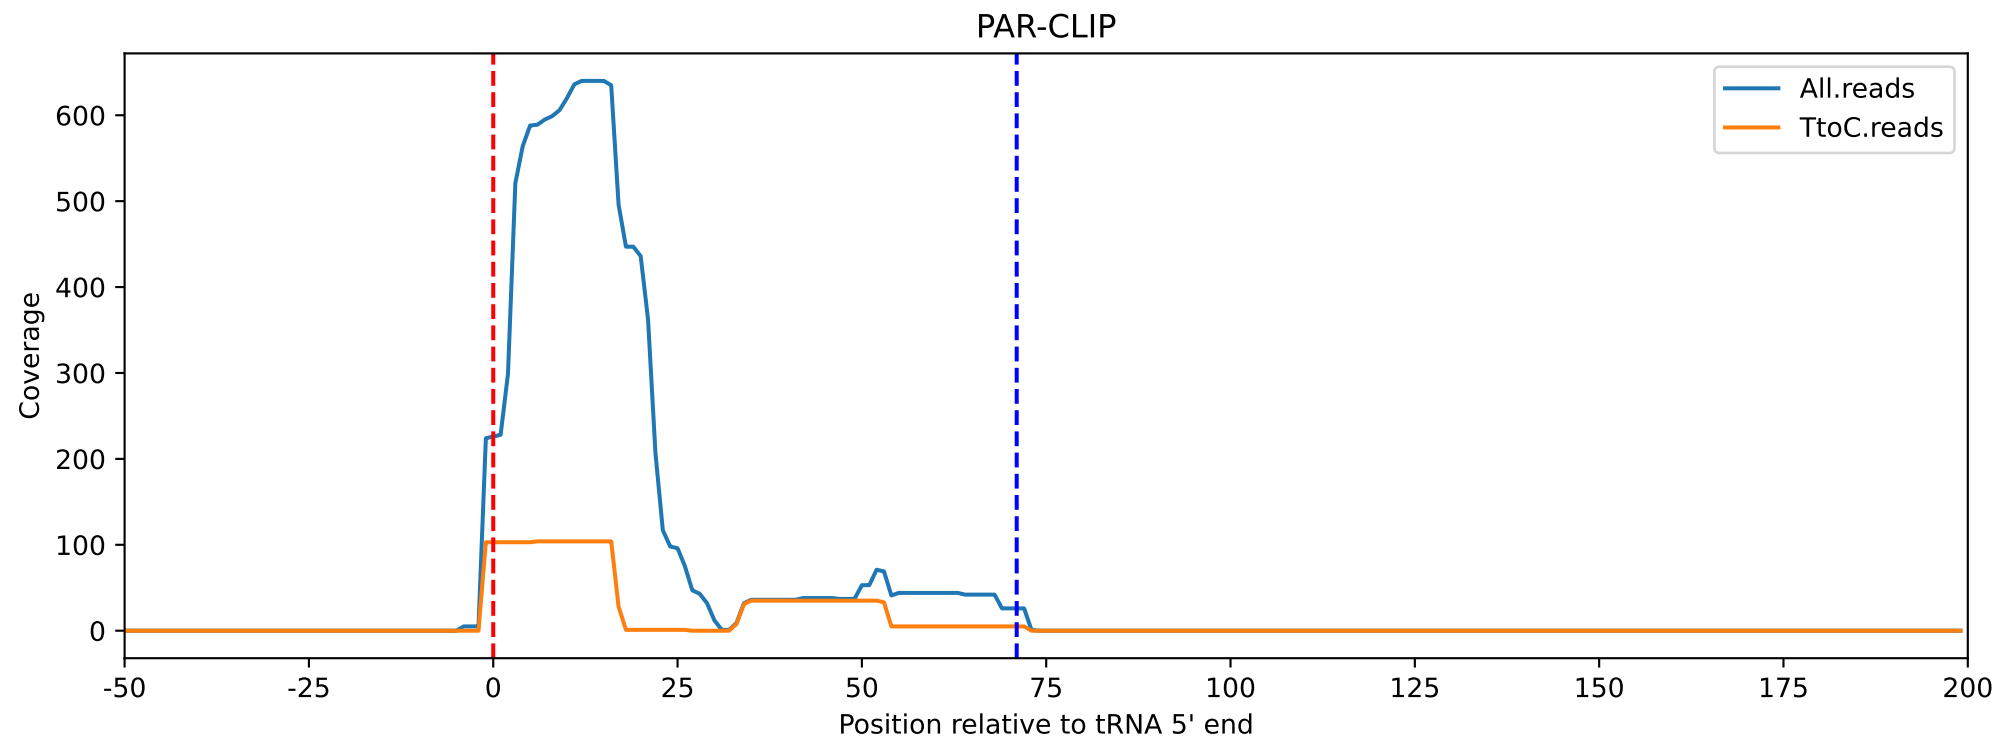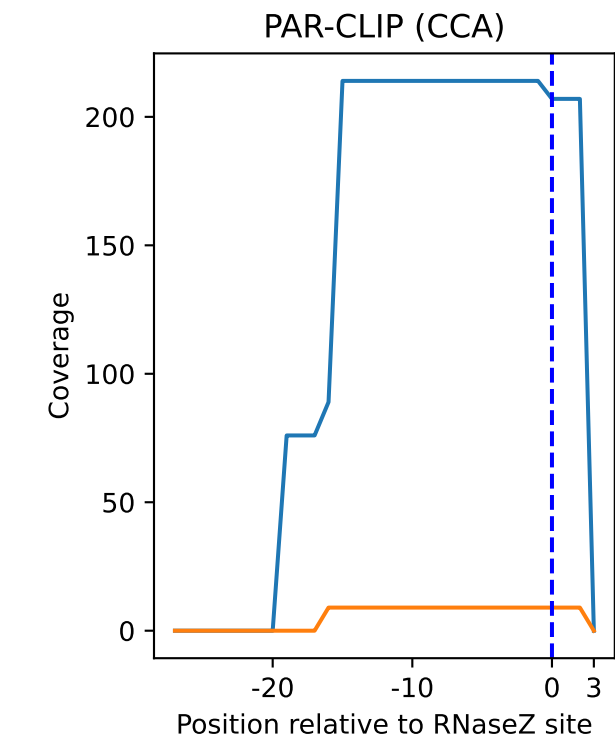

# tRNA-Met-CAT-1-3

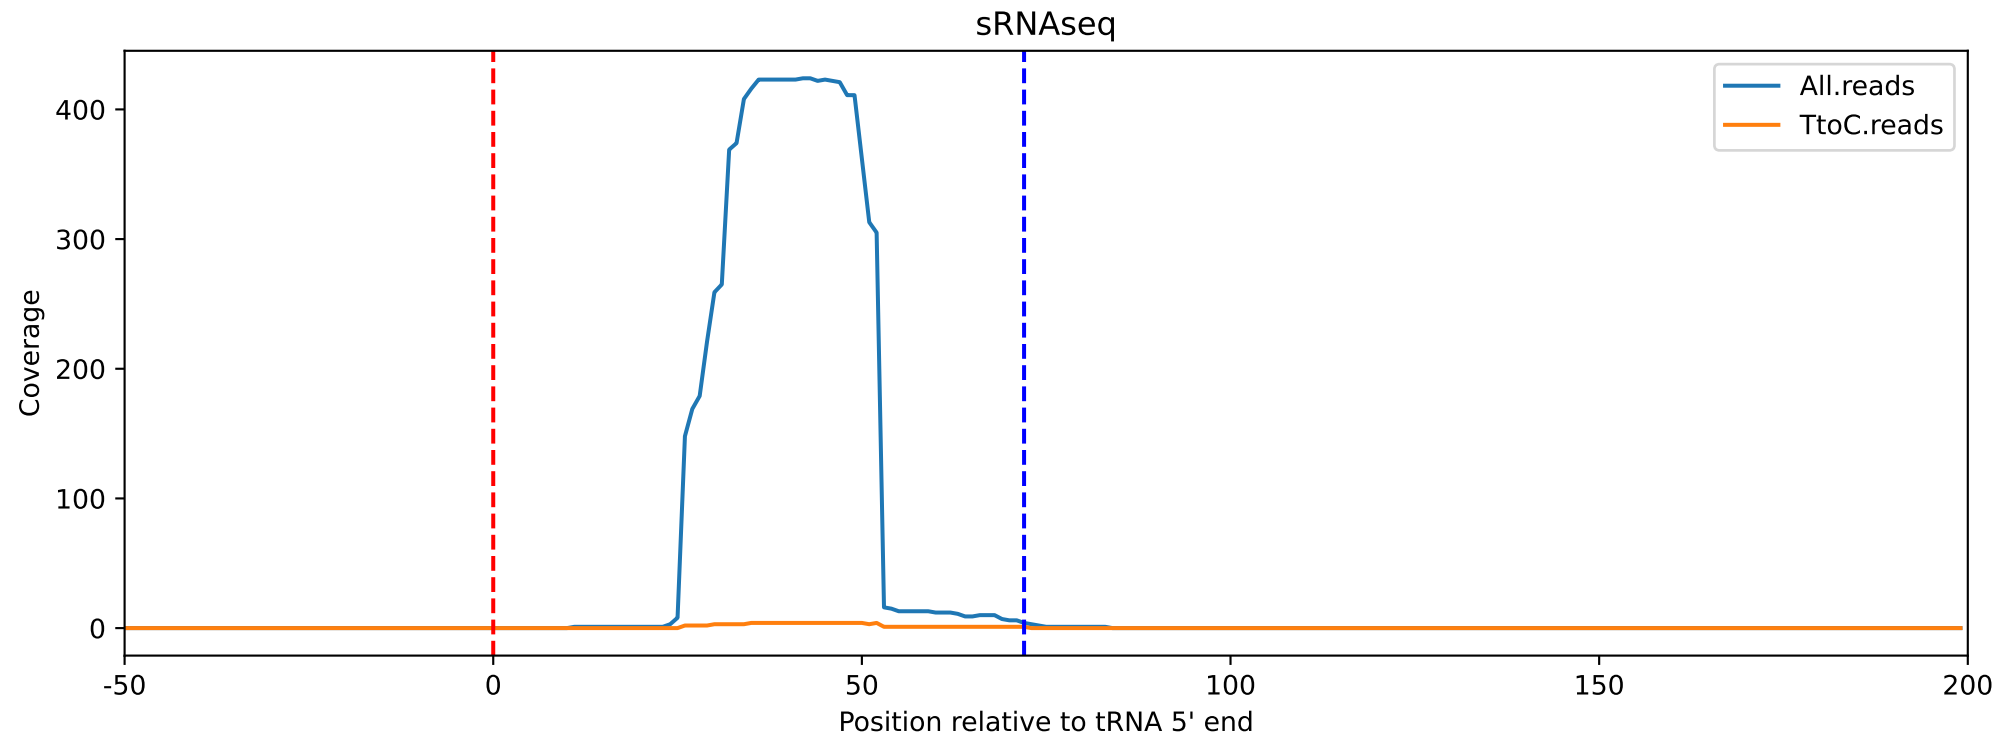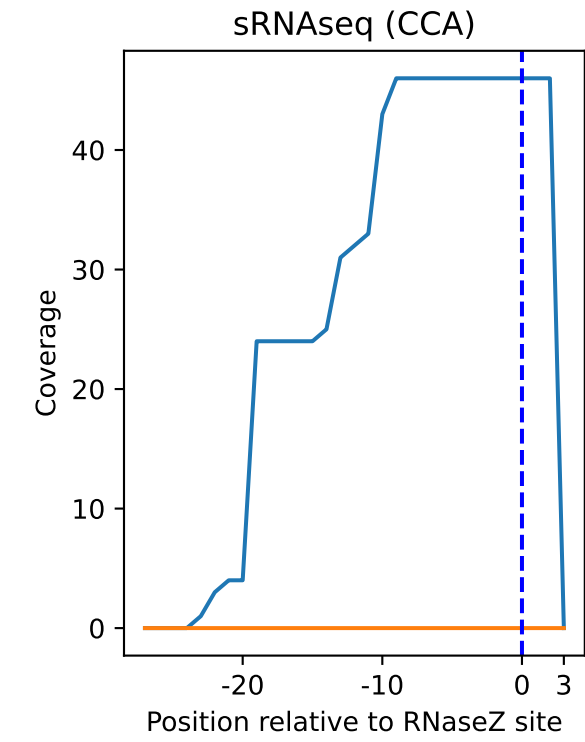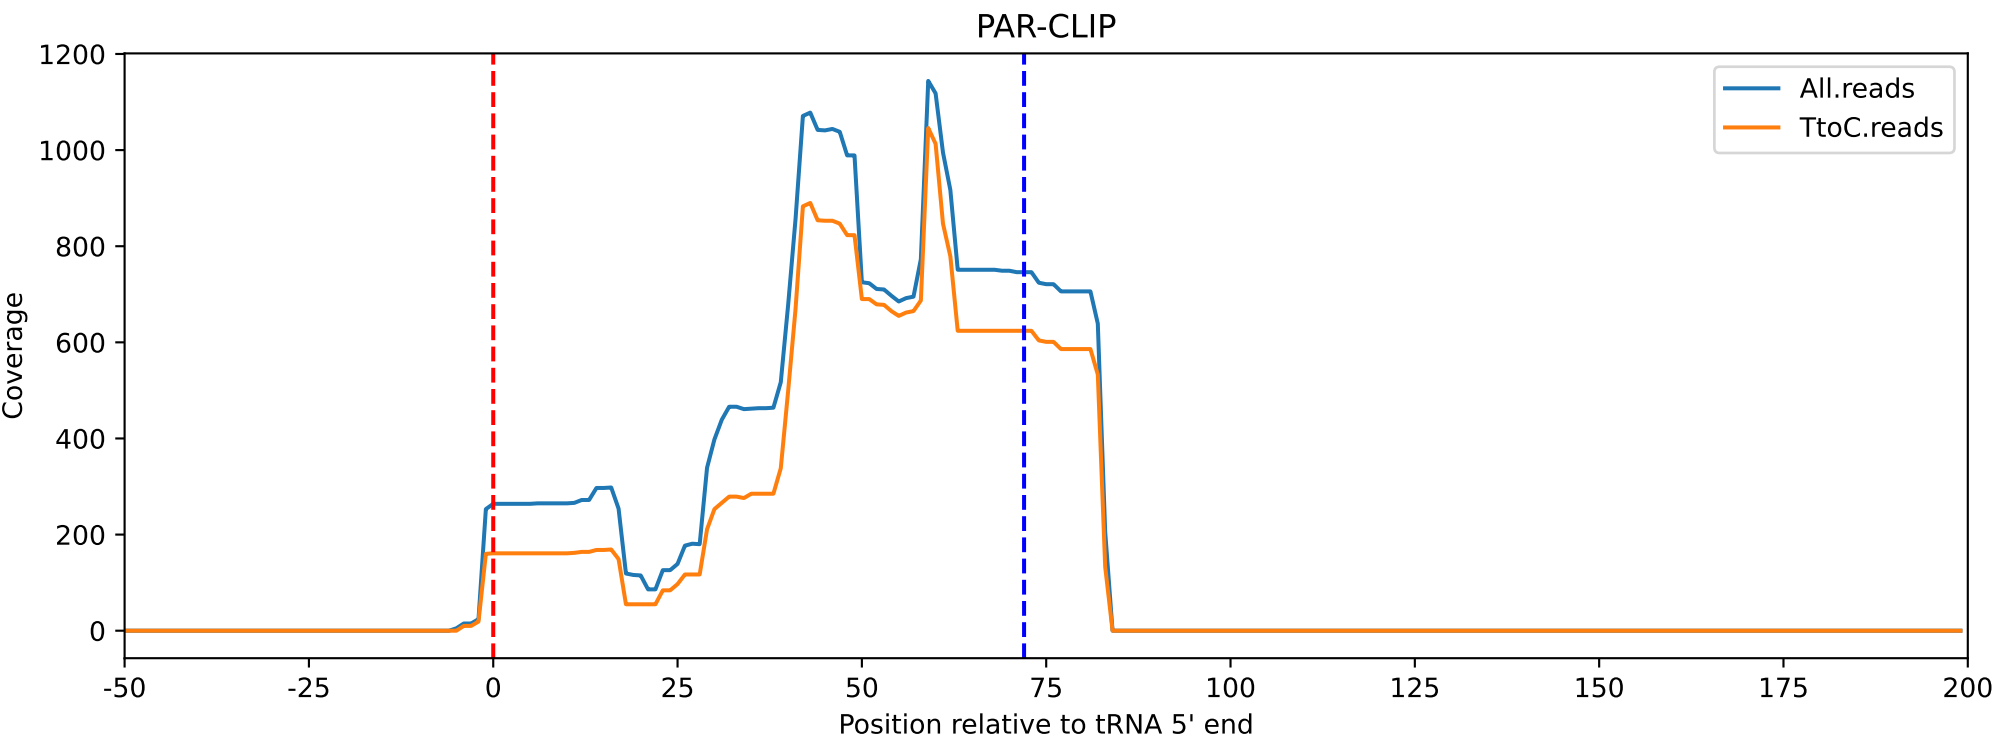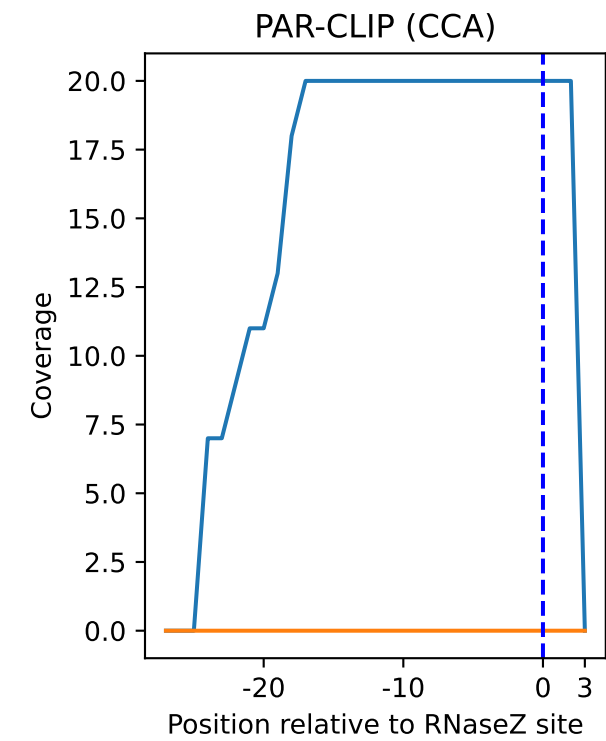

# tRNA-Glu-CTC-2-2

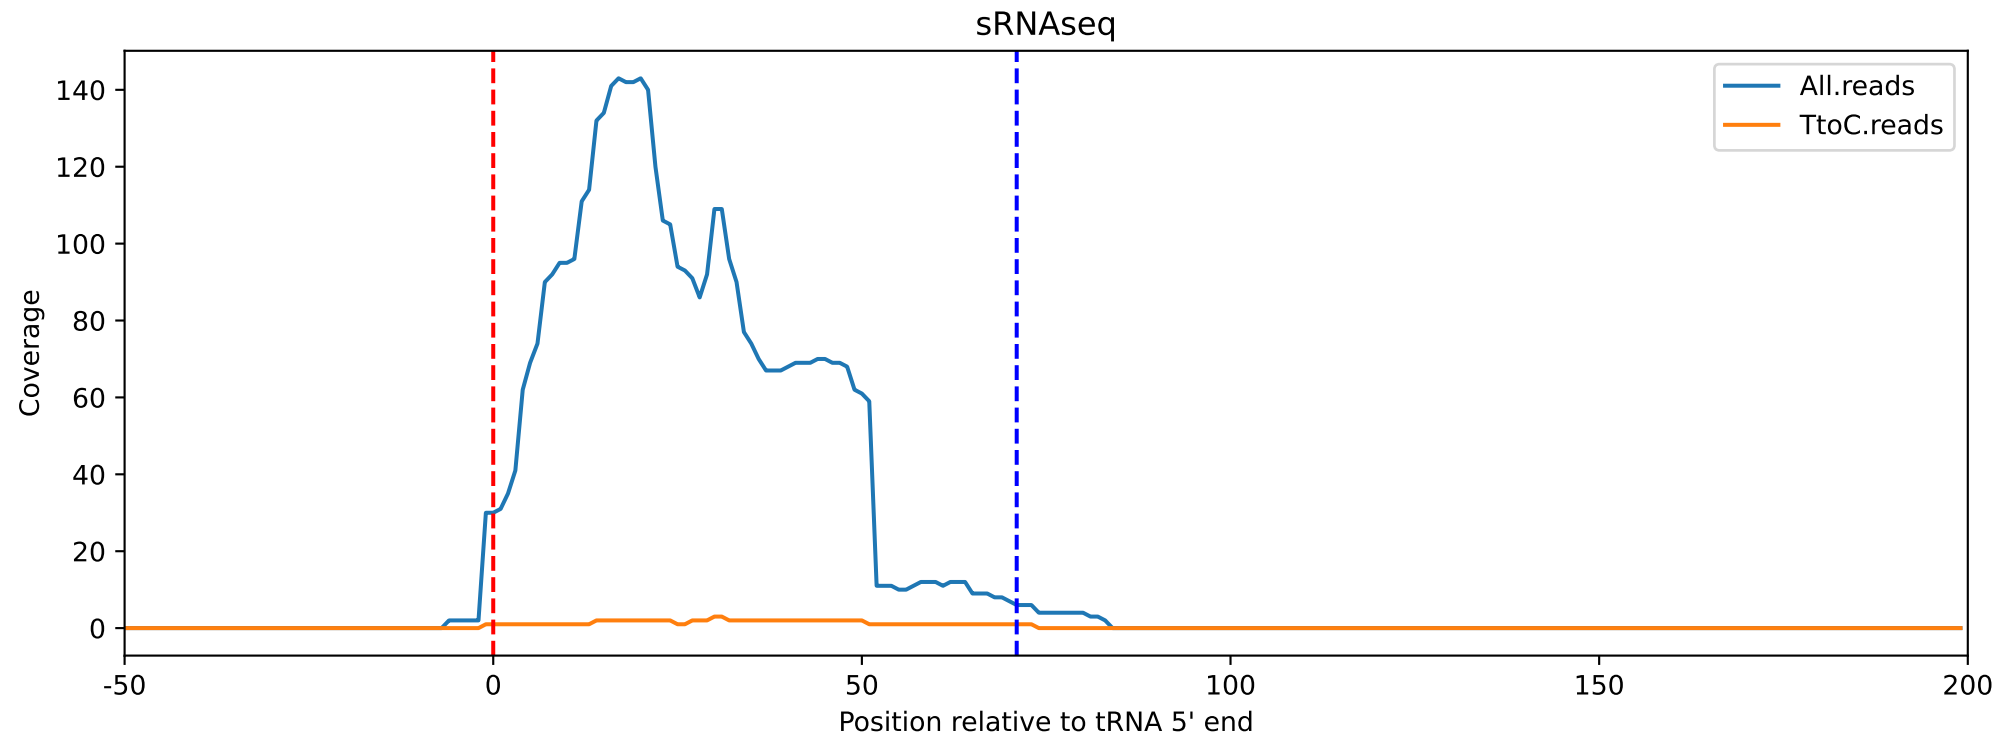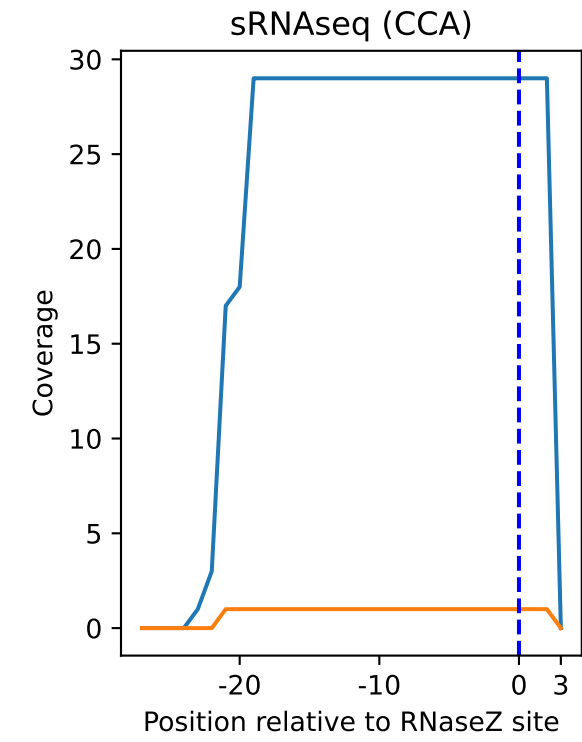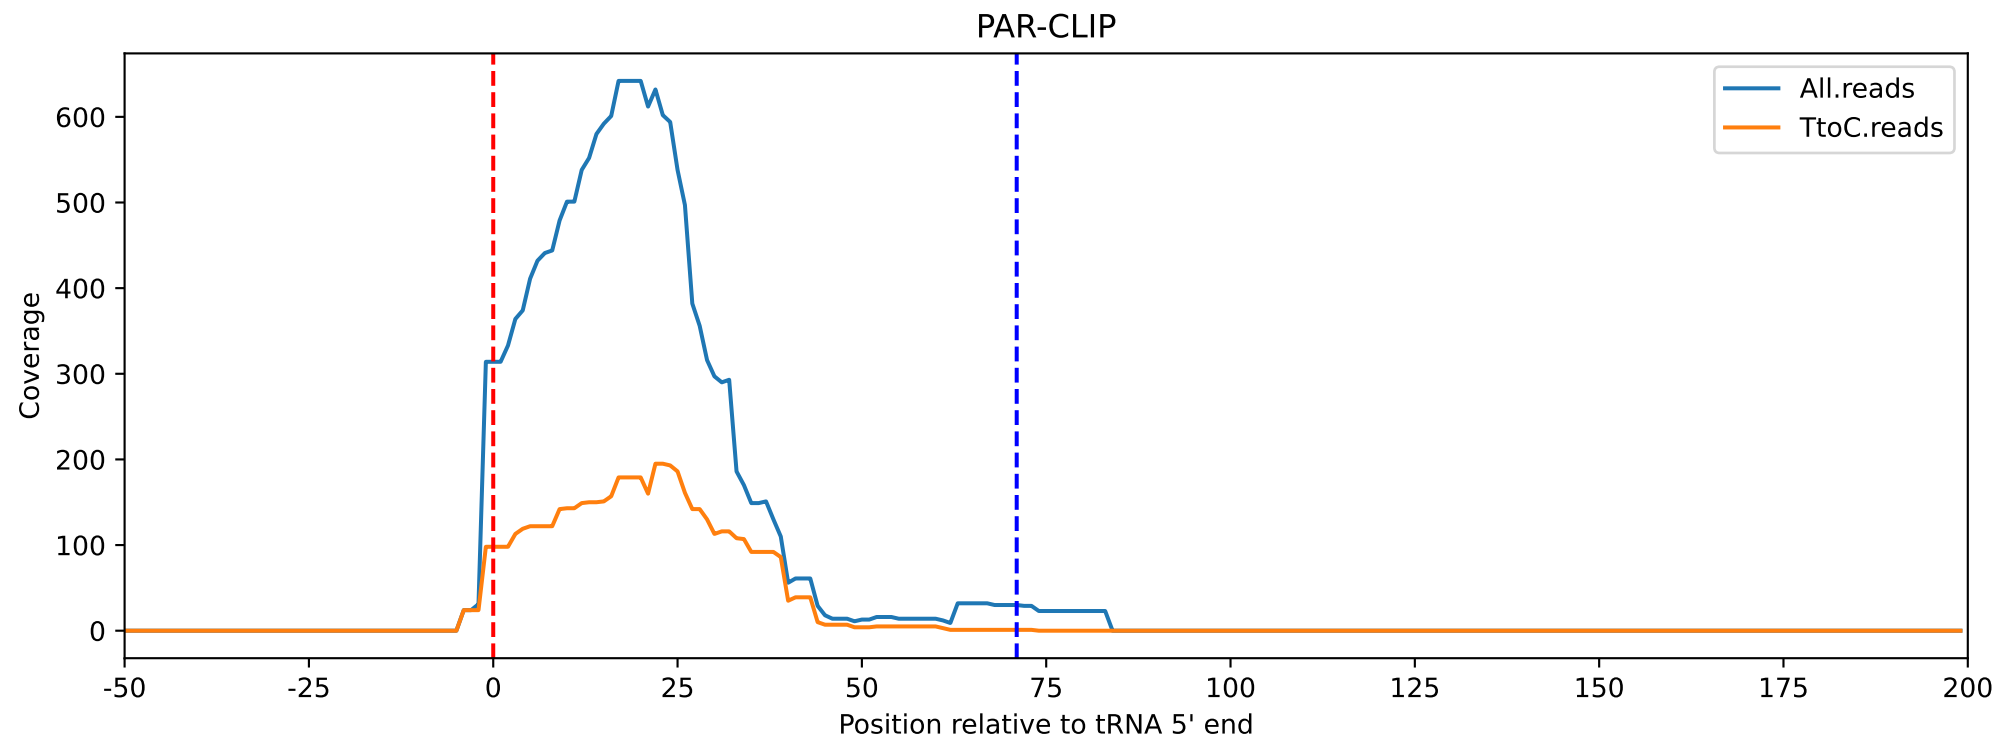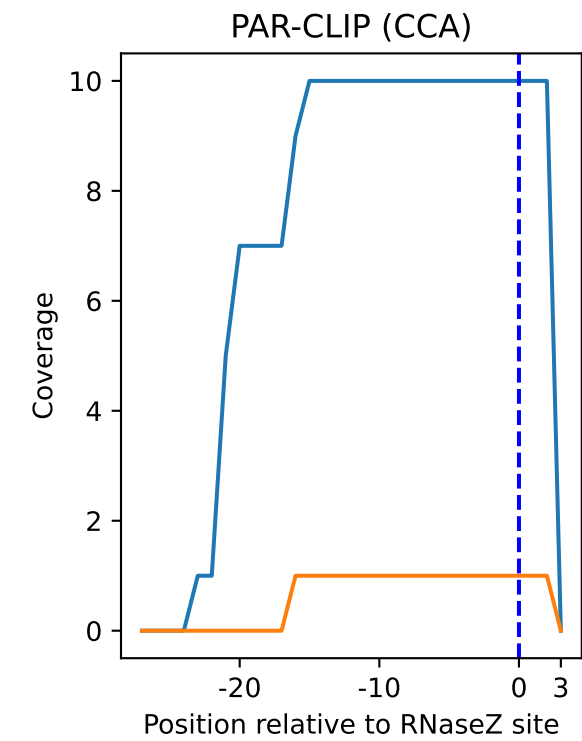

# tRNA-Ser-AGA-2-3

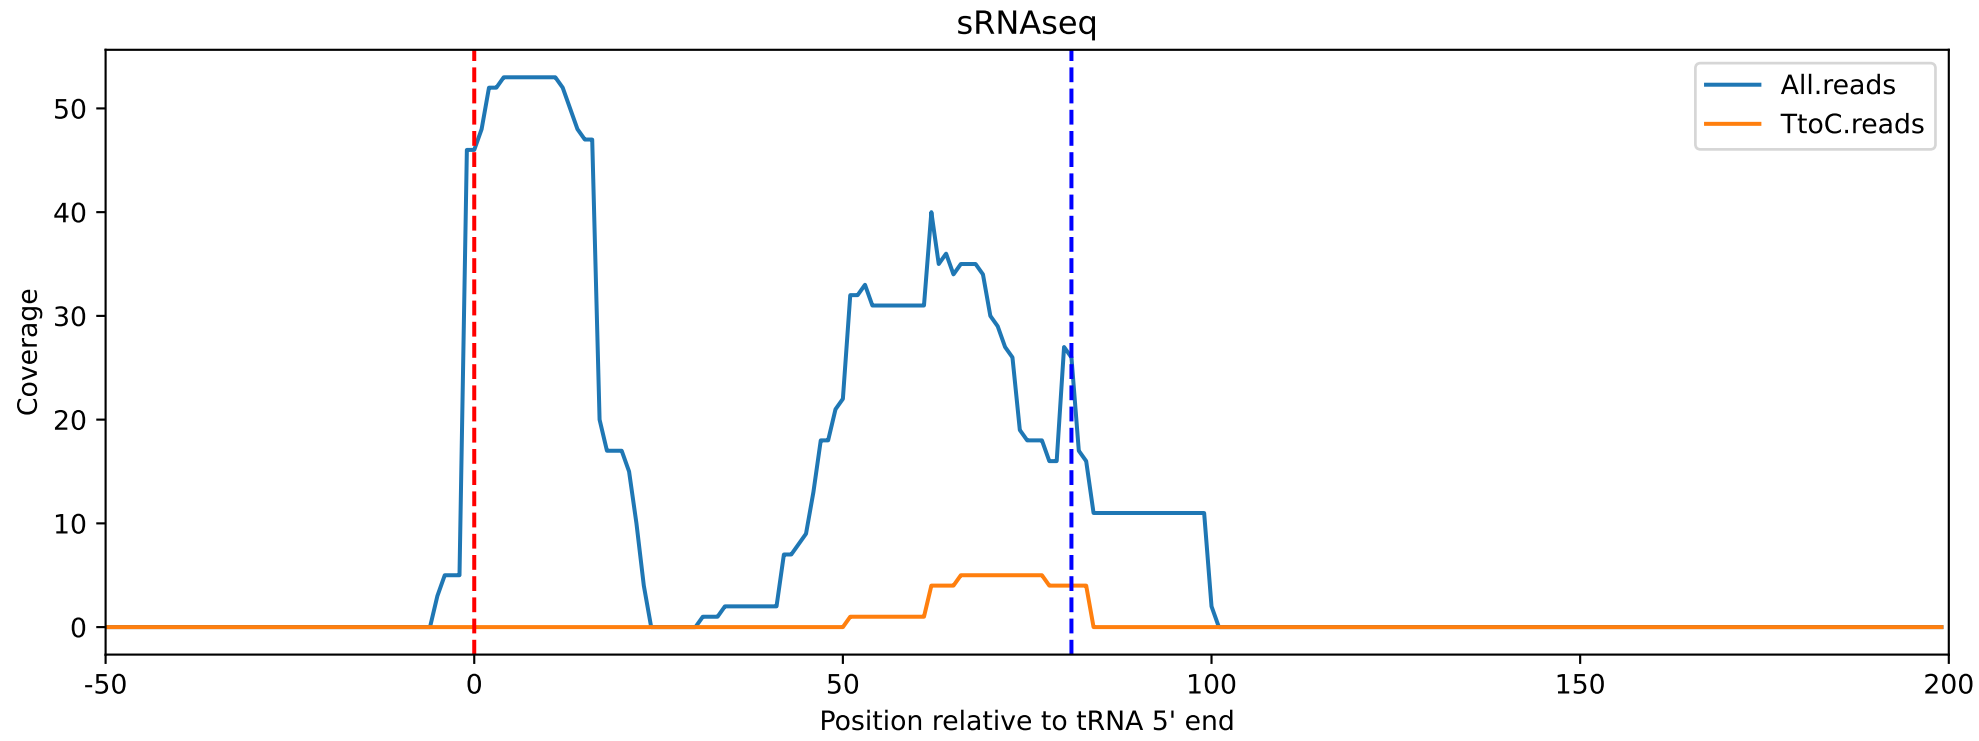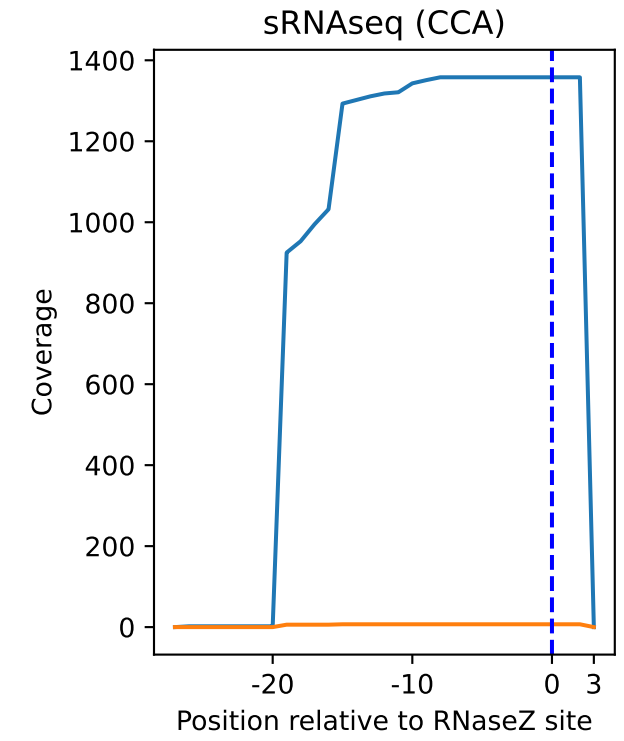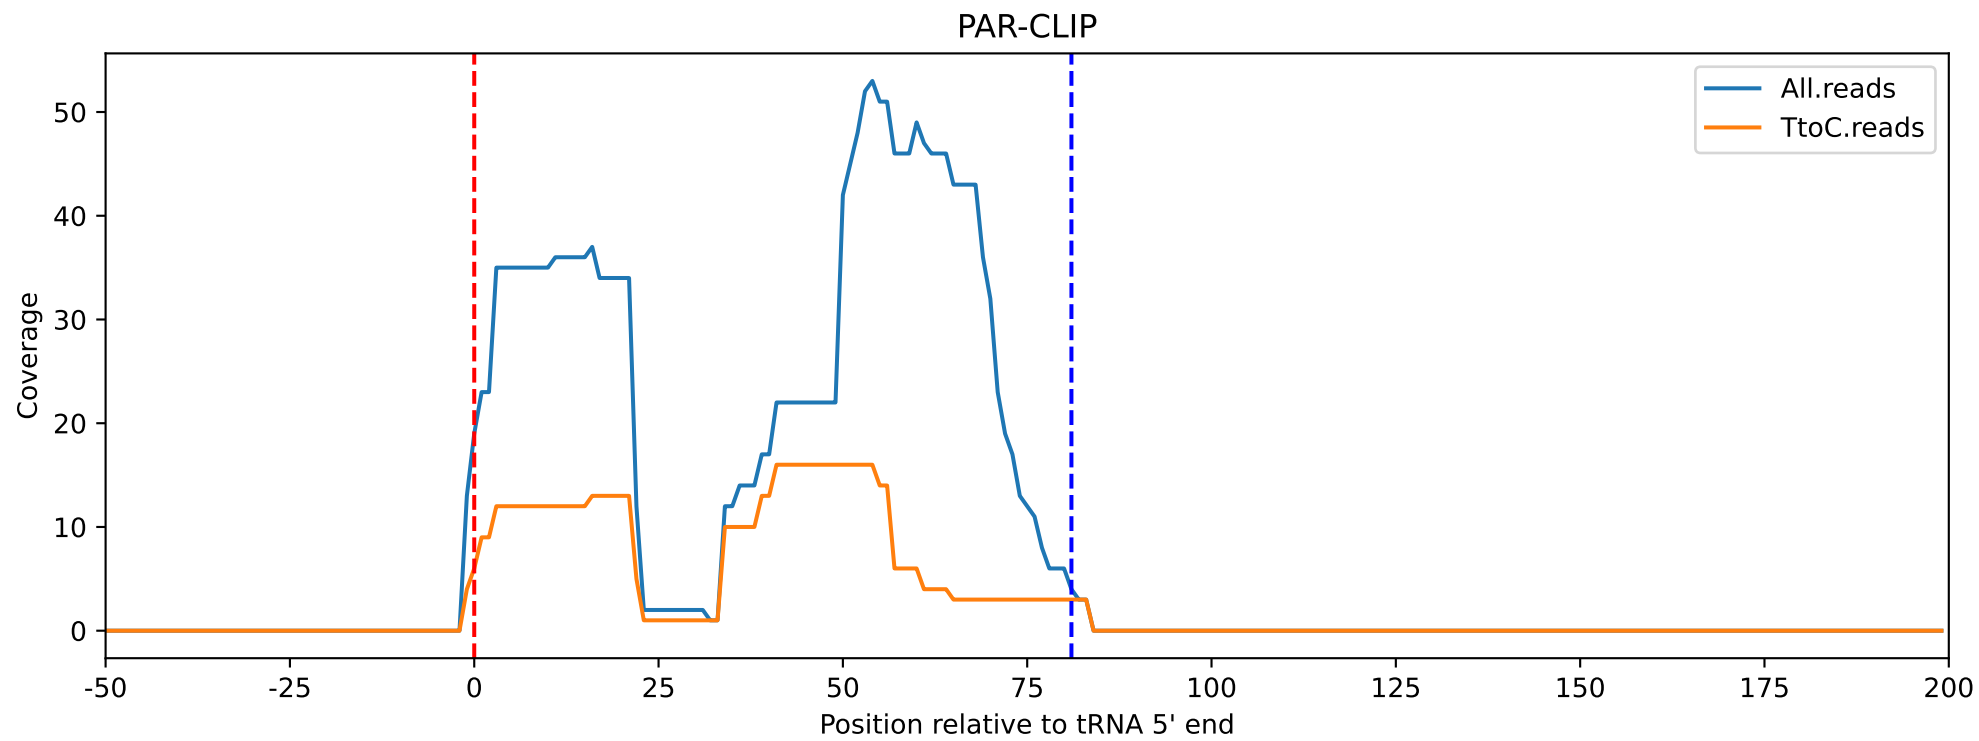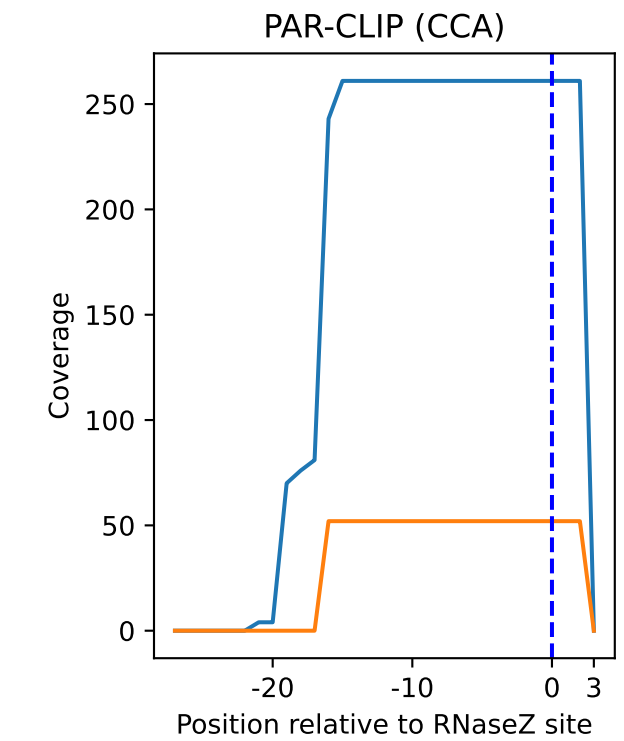

# tRNA-Val-AAC-2-2

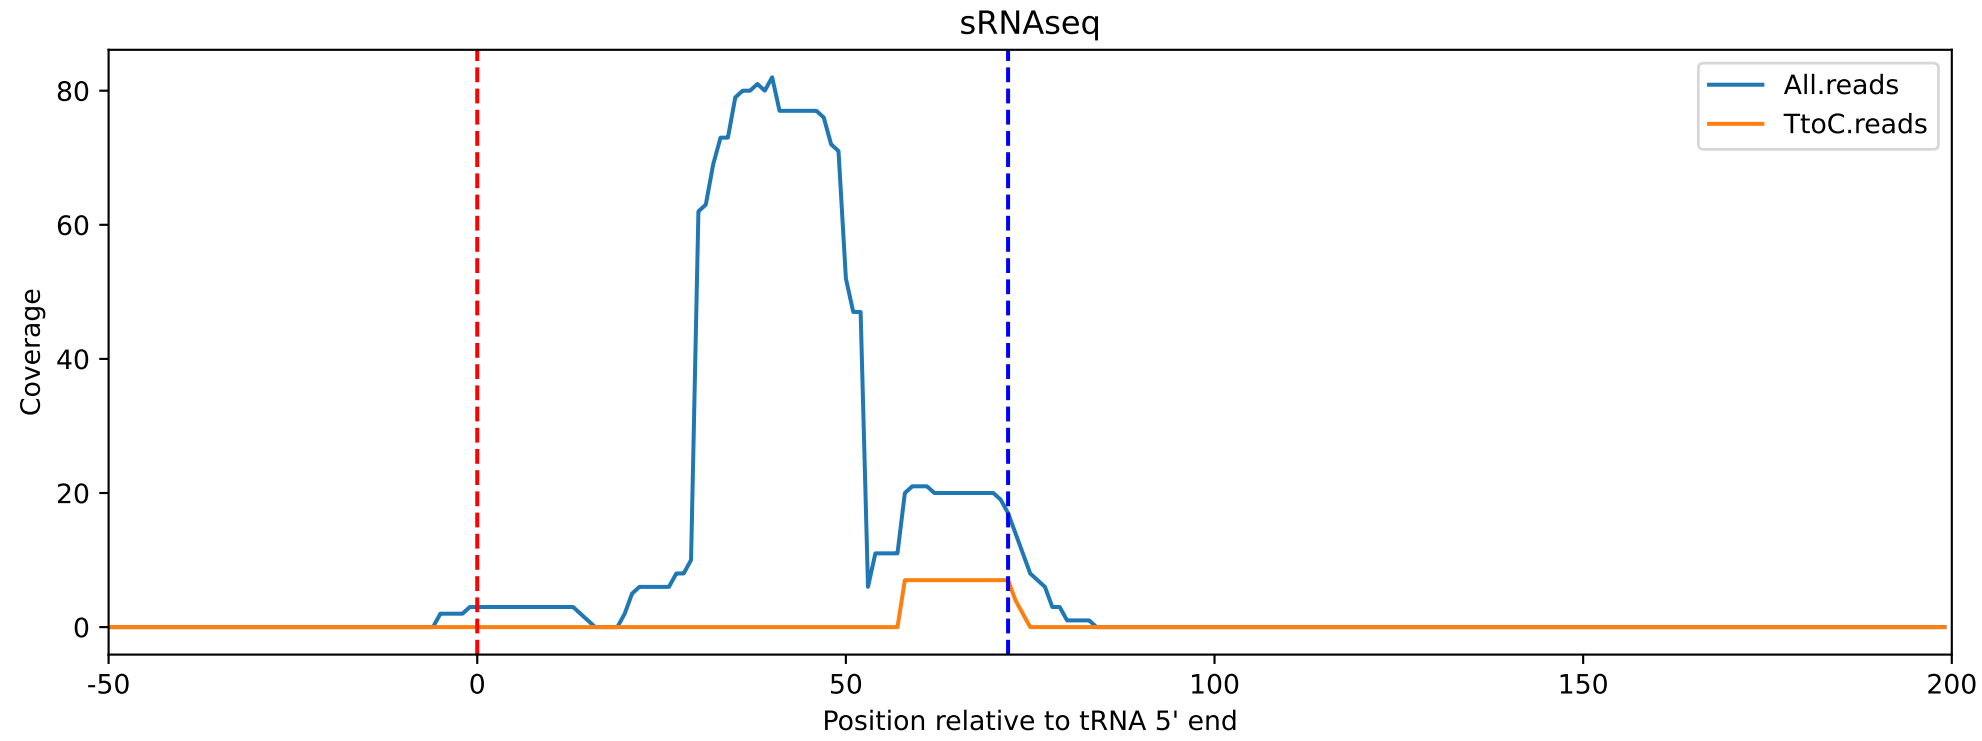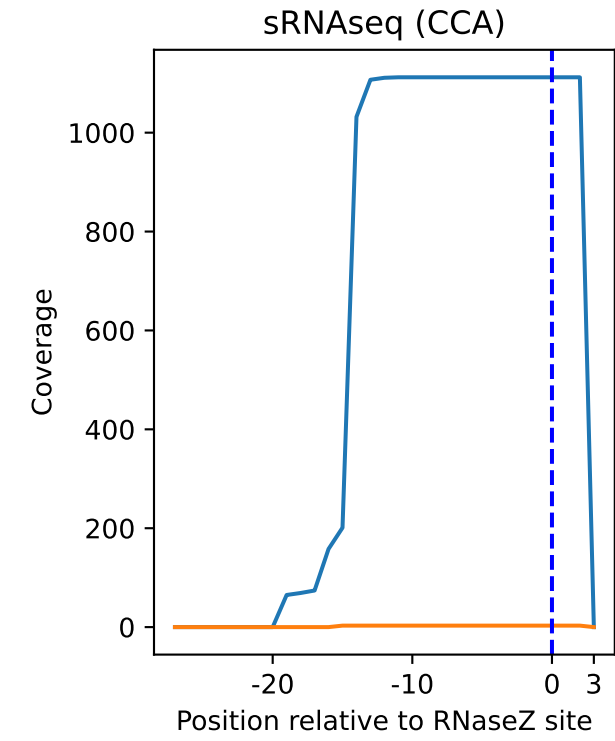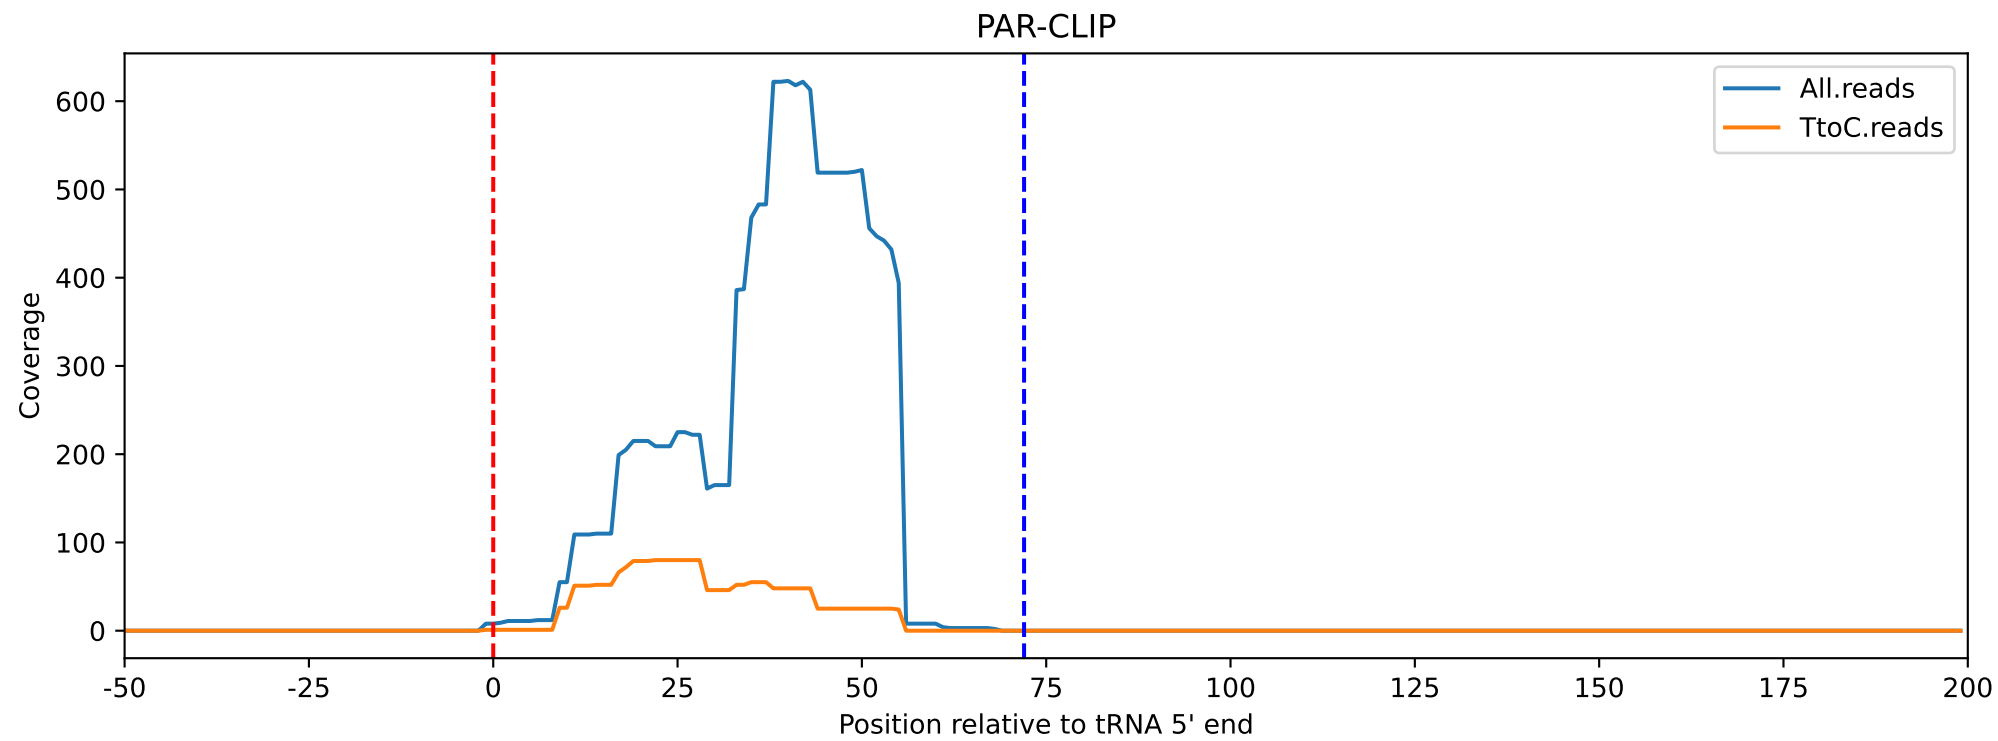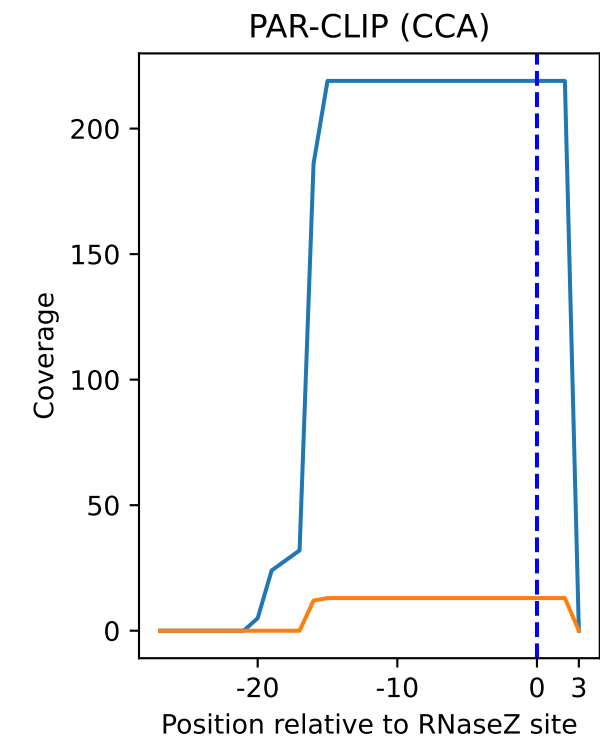

# tRNA-Gln-CTG-2-3

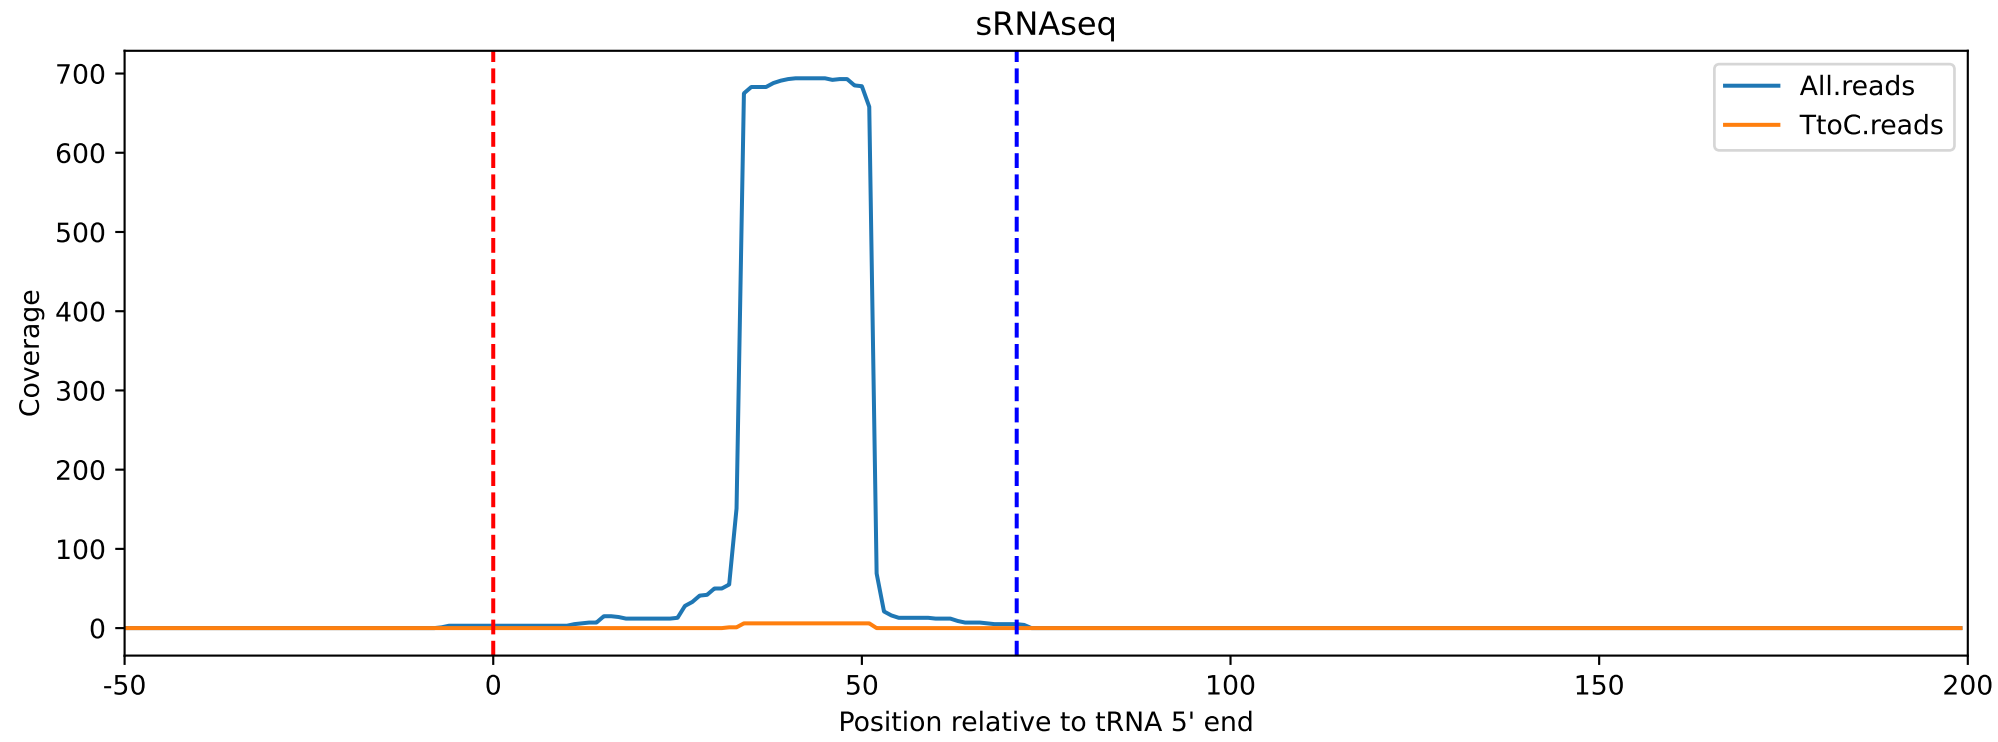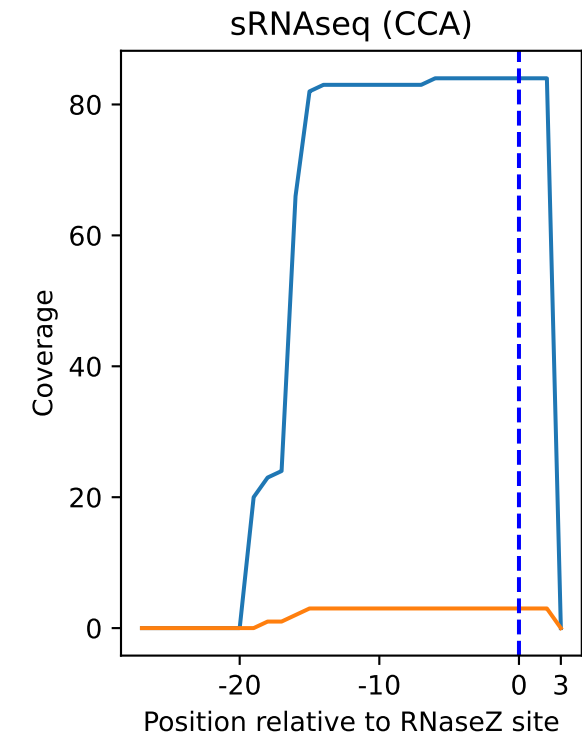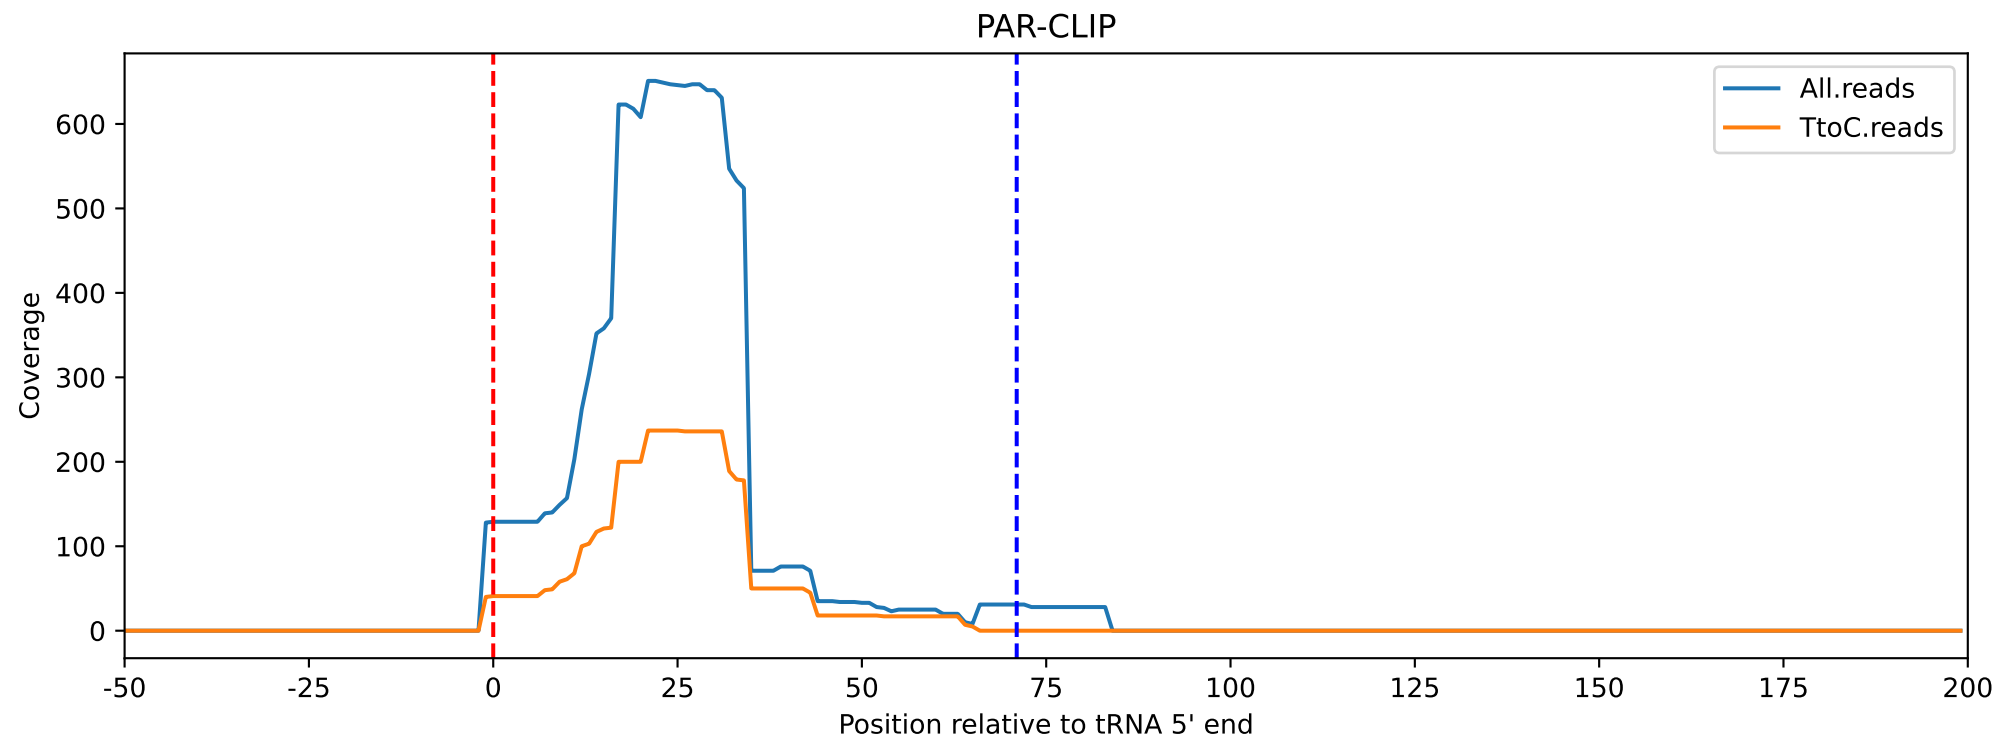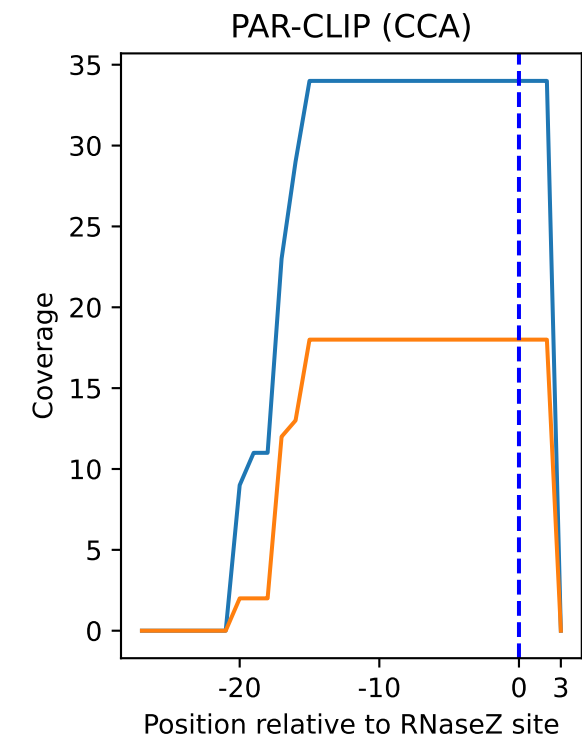

# tRNA-Ser-AGA-2-5

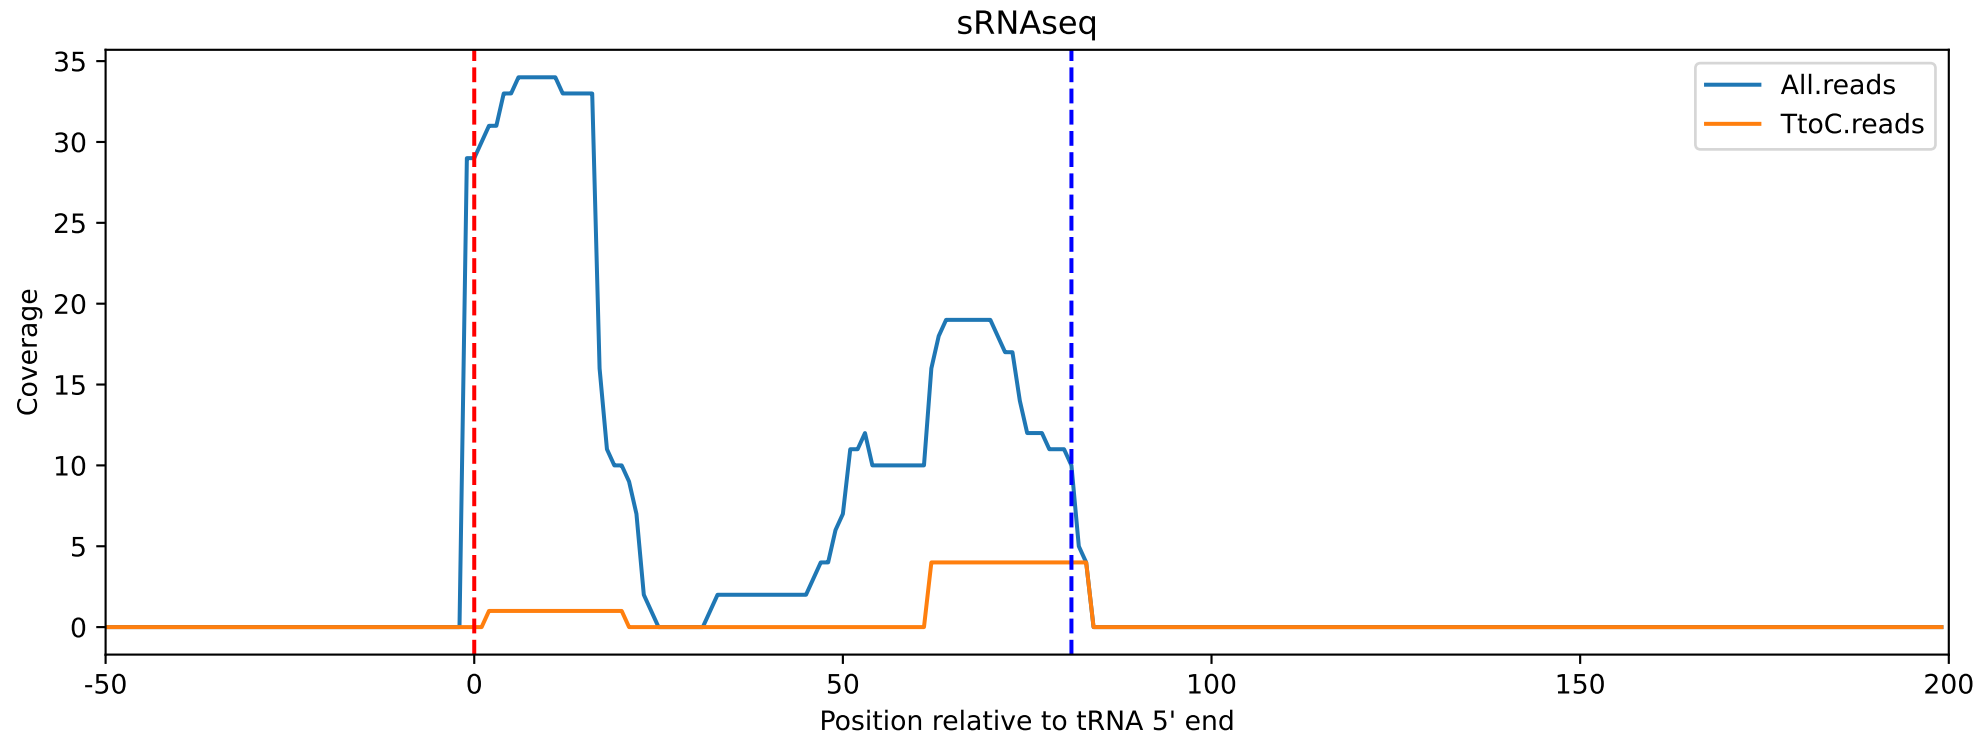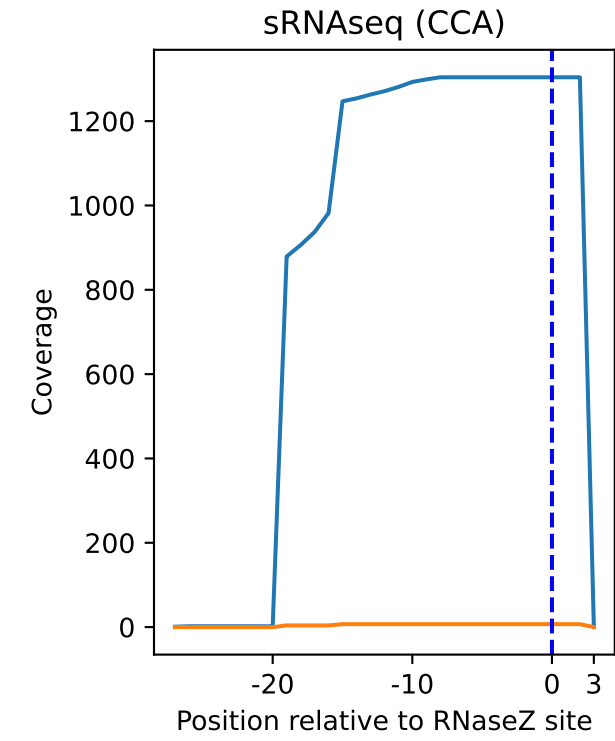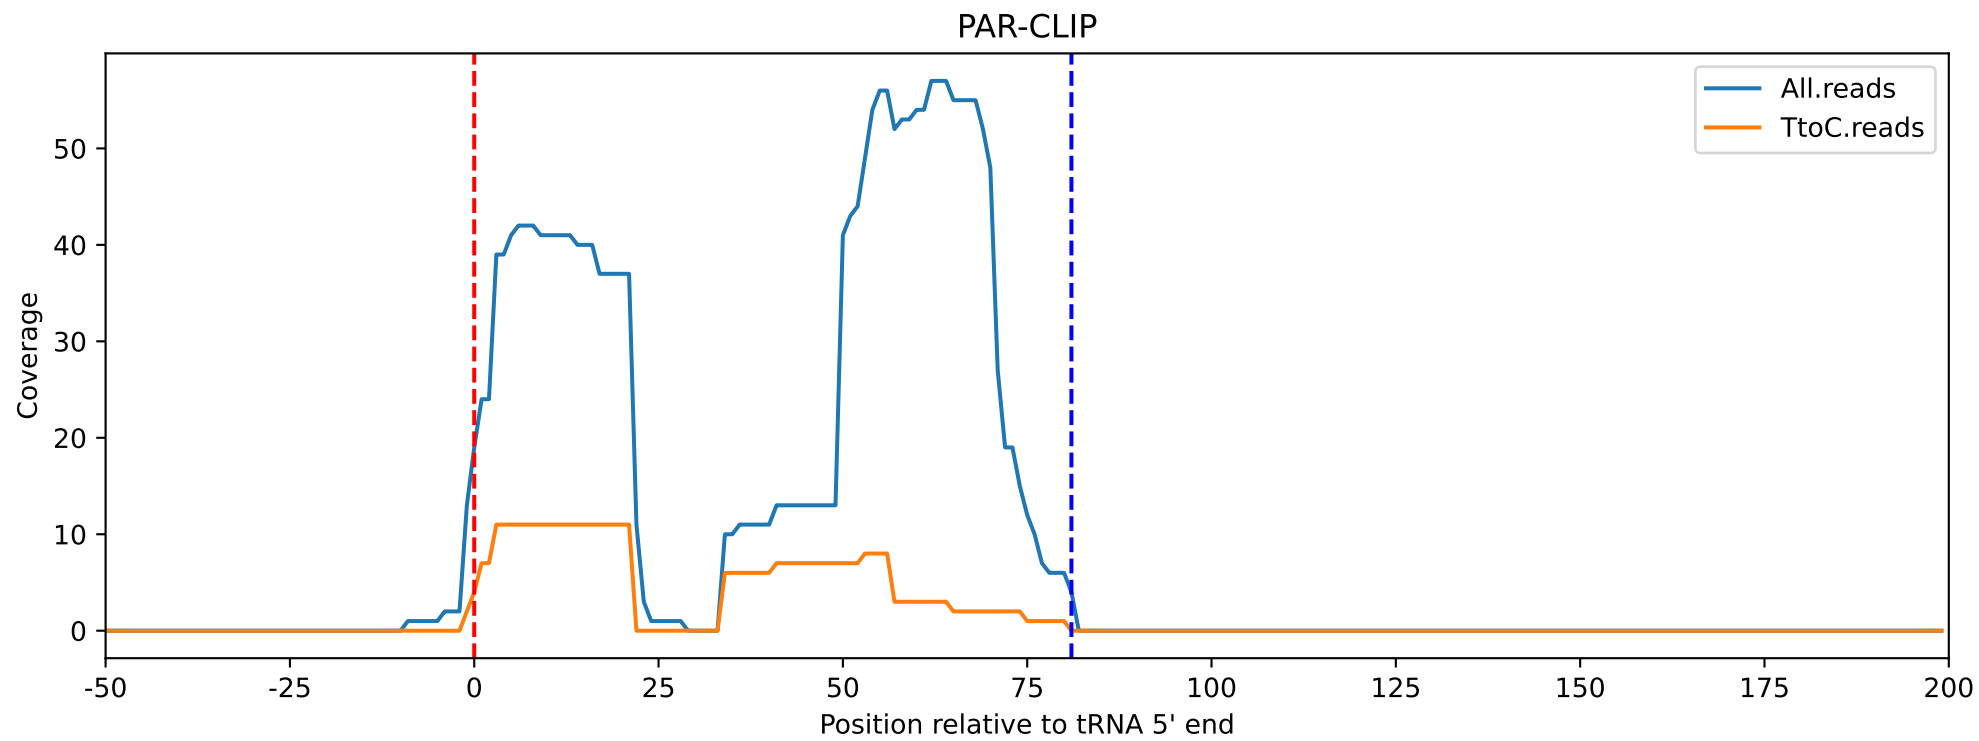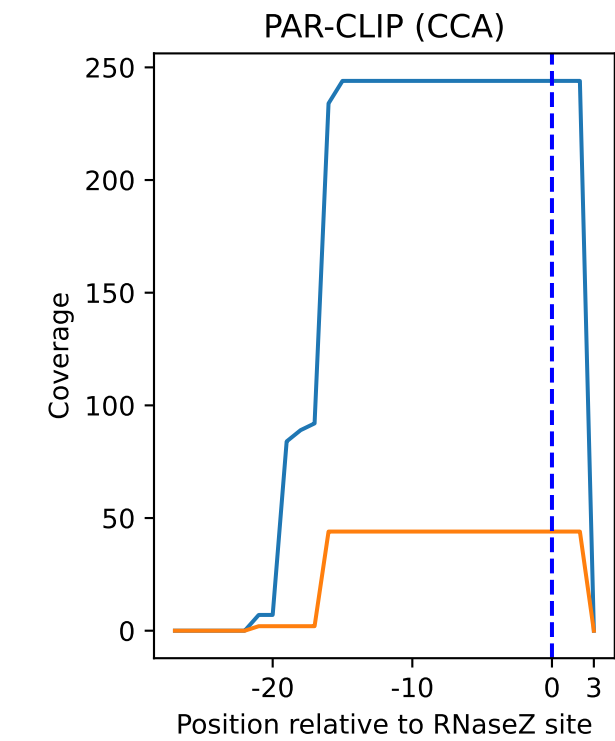



# tRNA-Gly-GCC-1-5

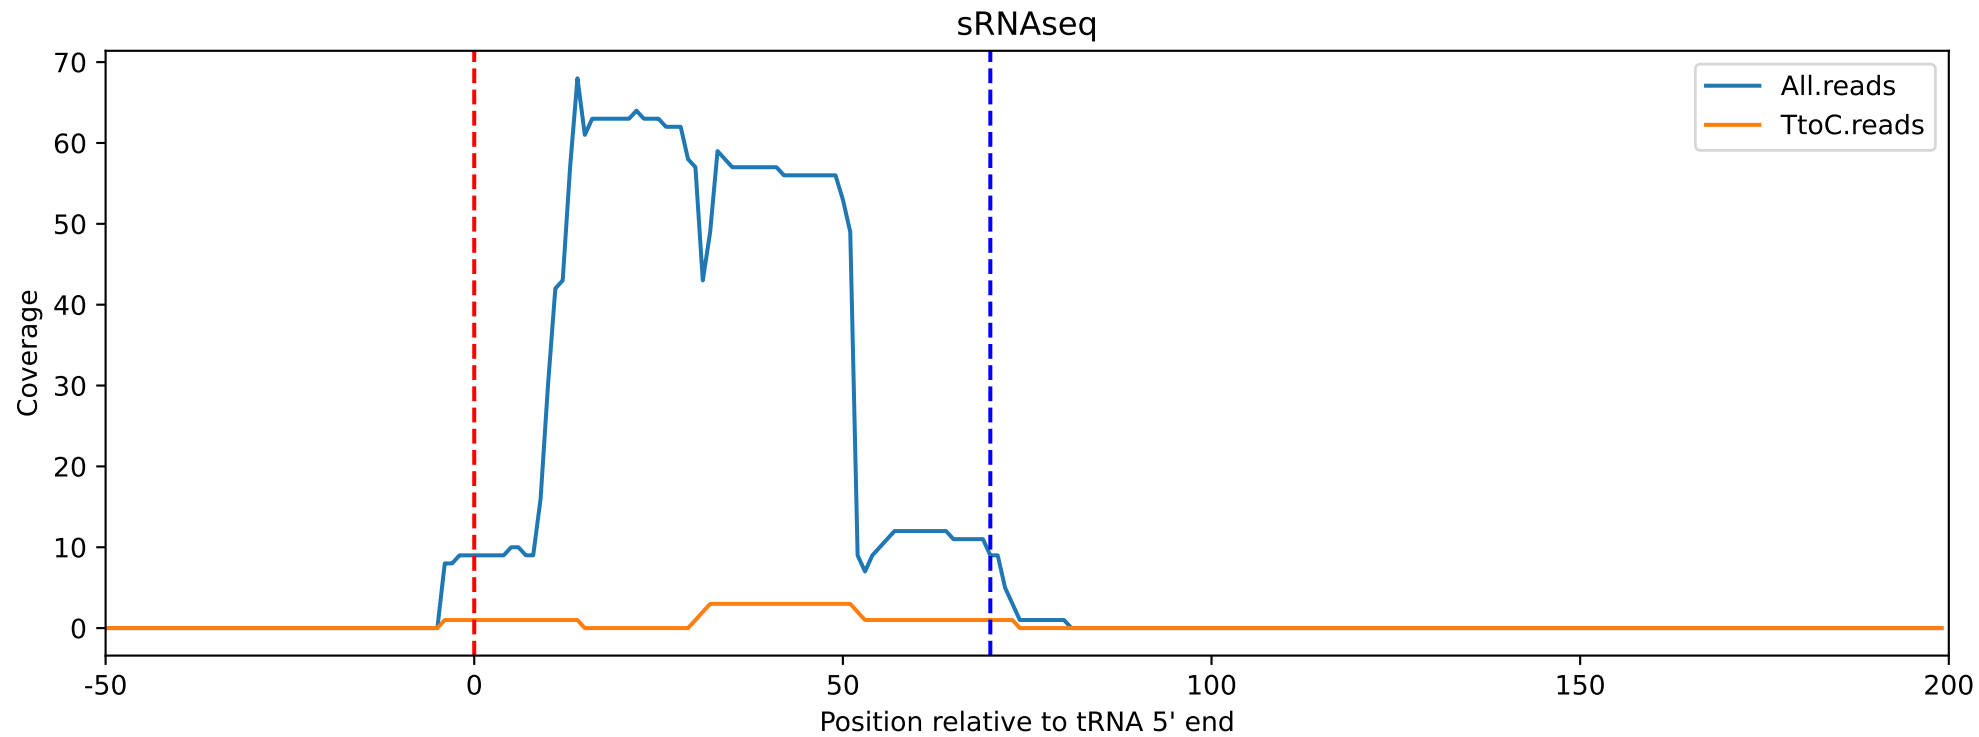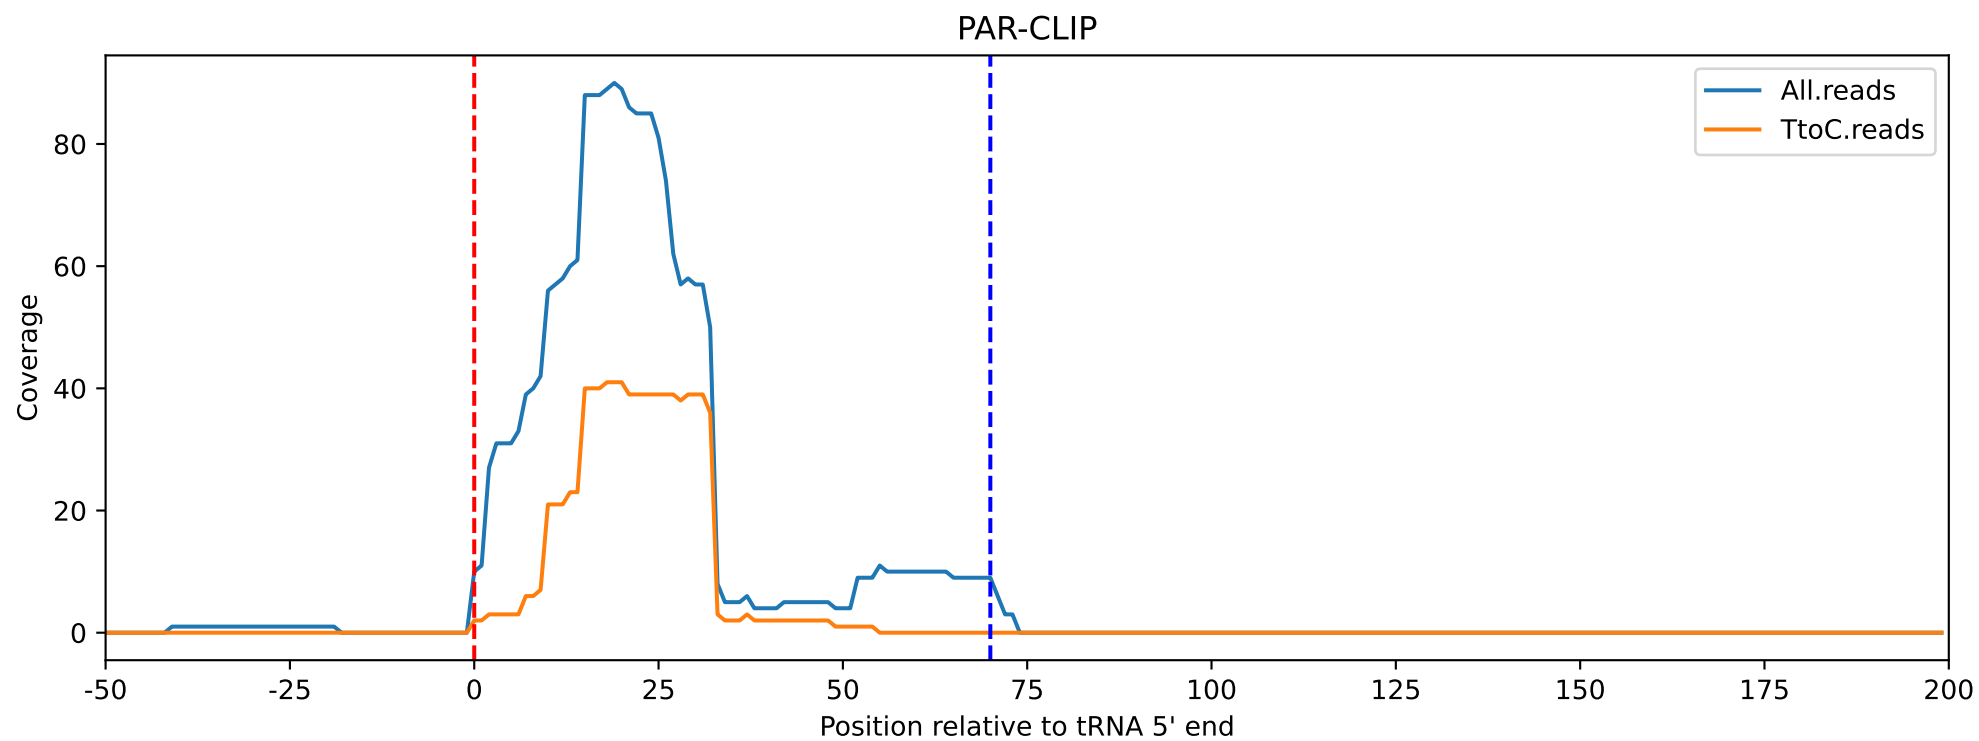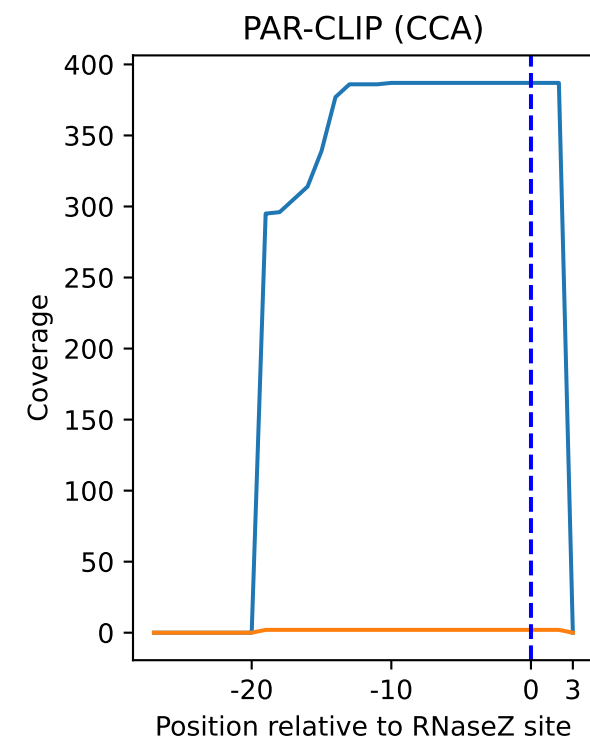

# tRNA-Ile-AAT-1-5

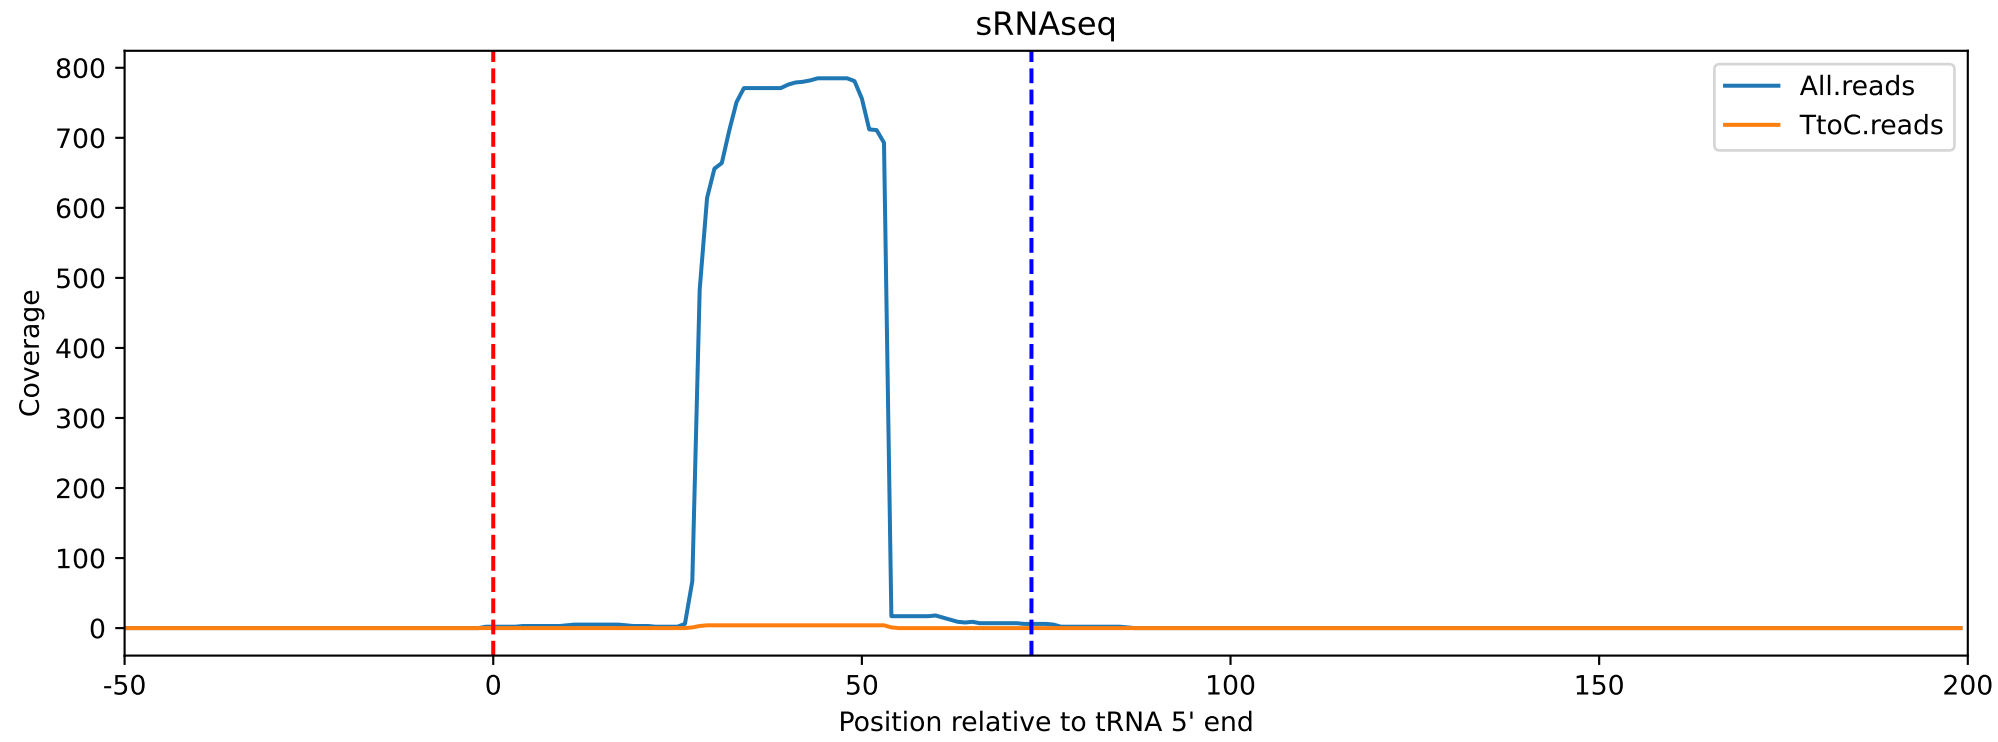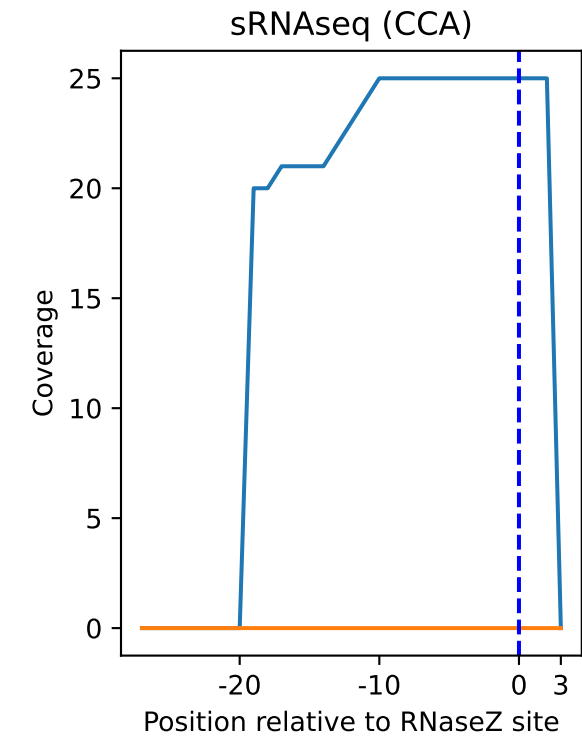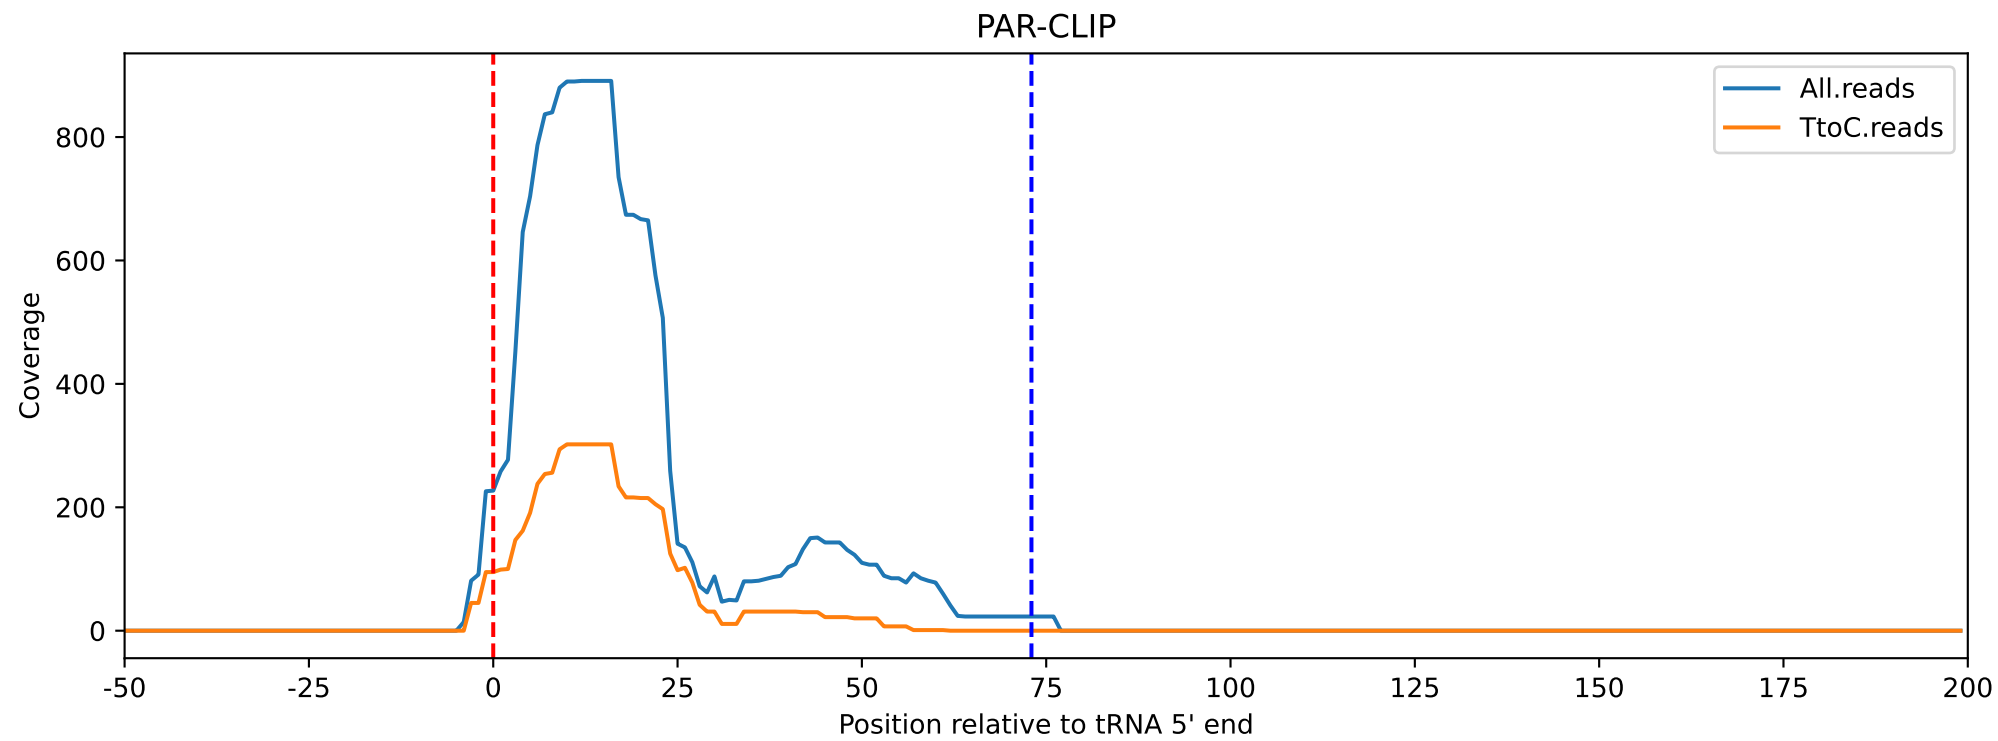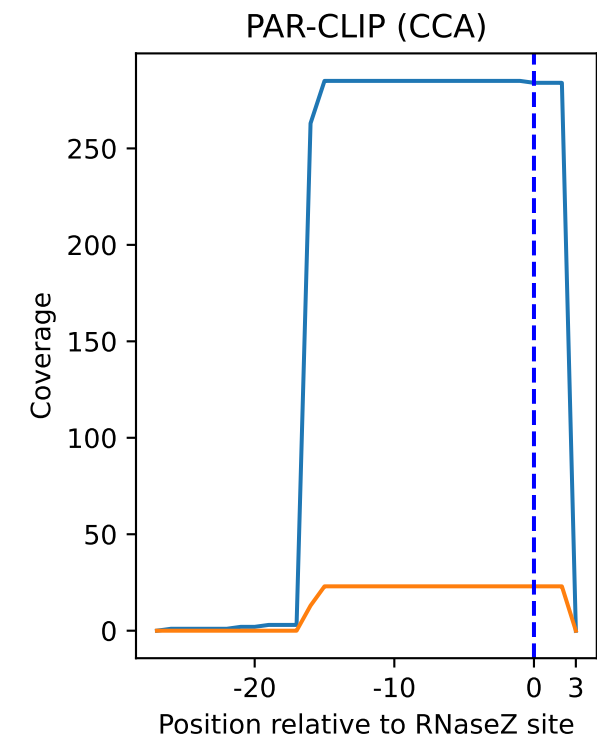

# tRNA-Val-TAC-1-1

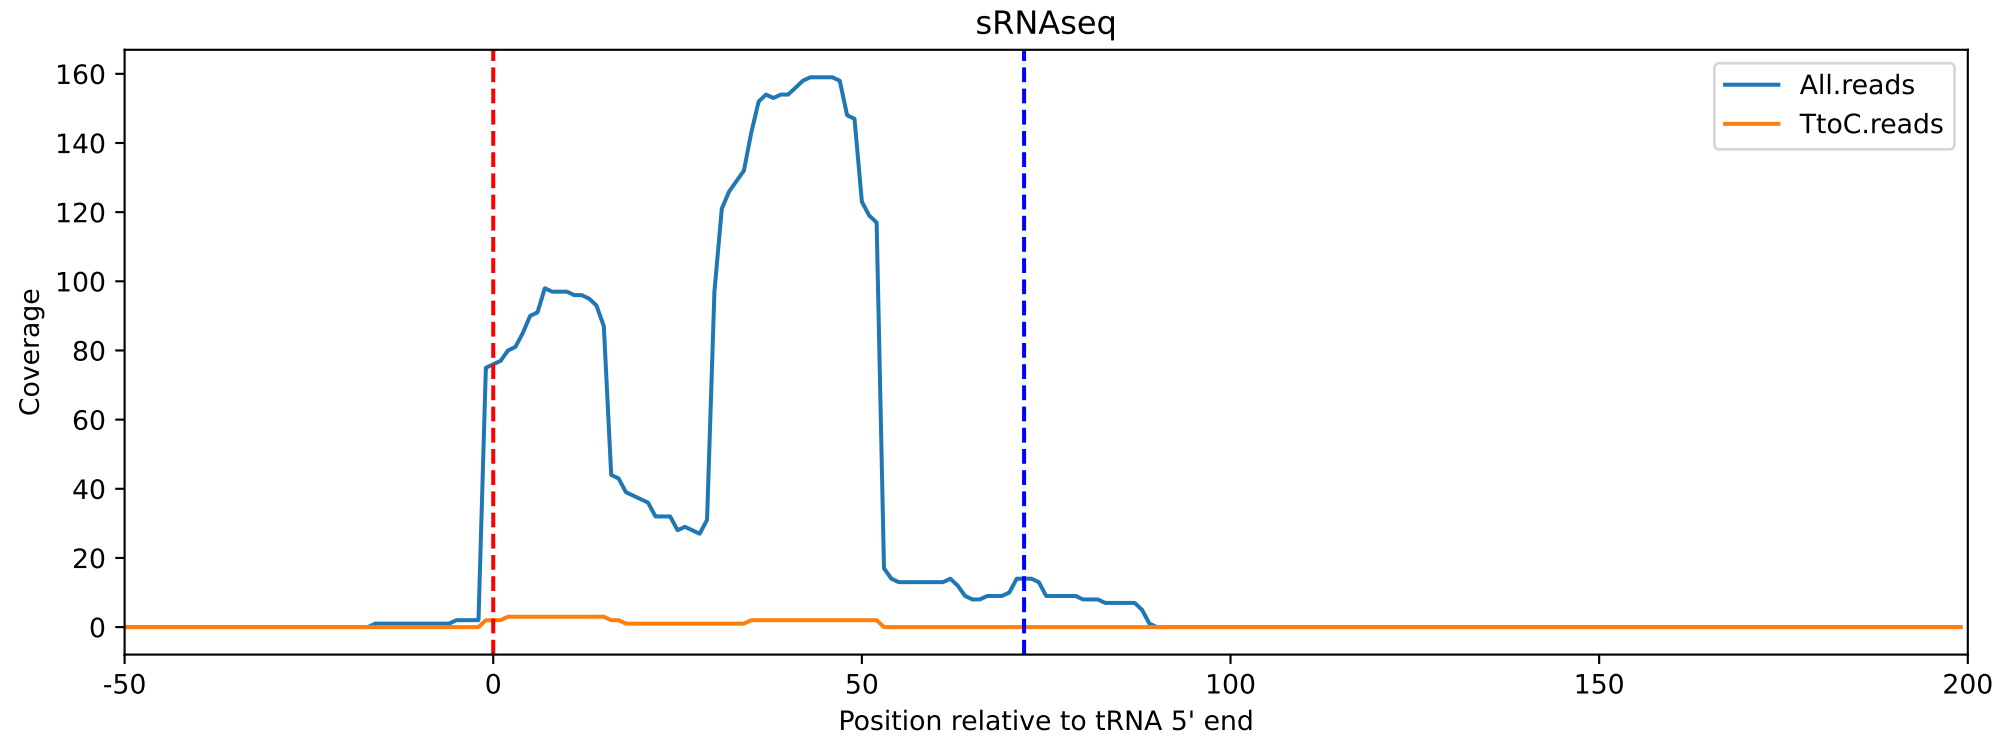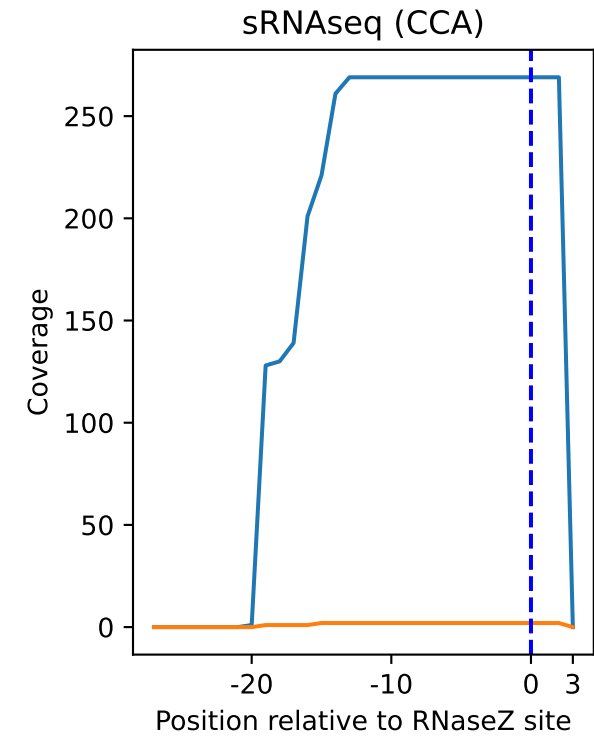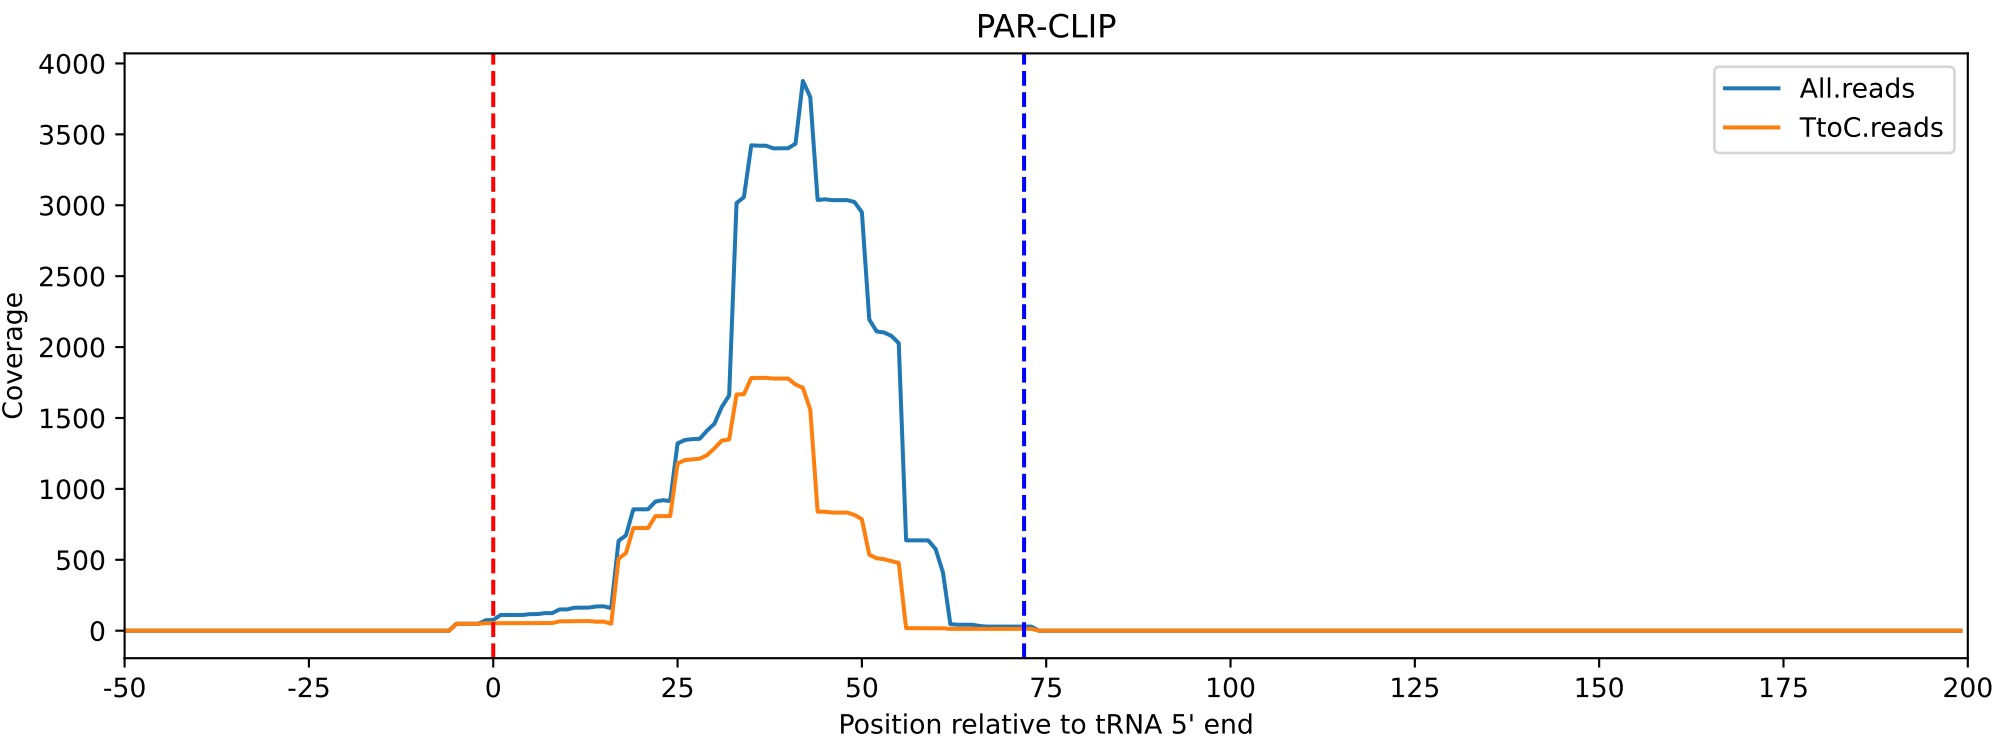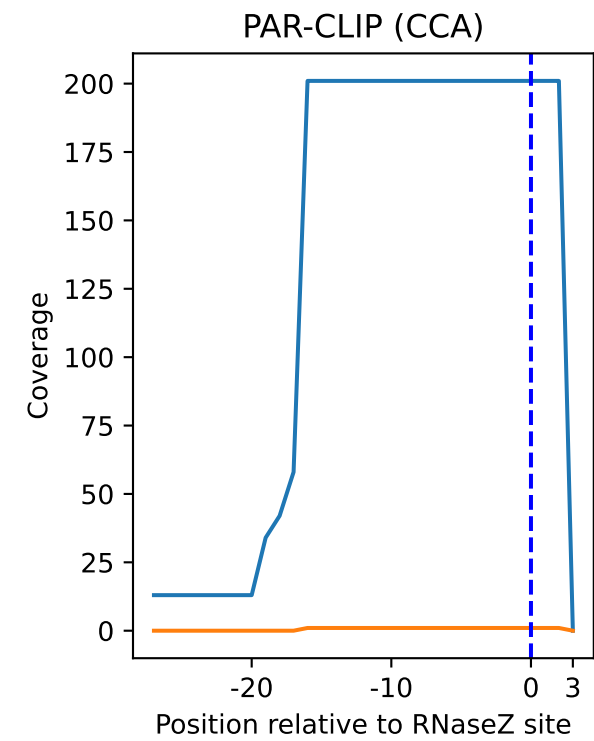

# tRNA-Lys-CTT-1-9

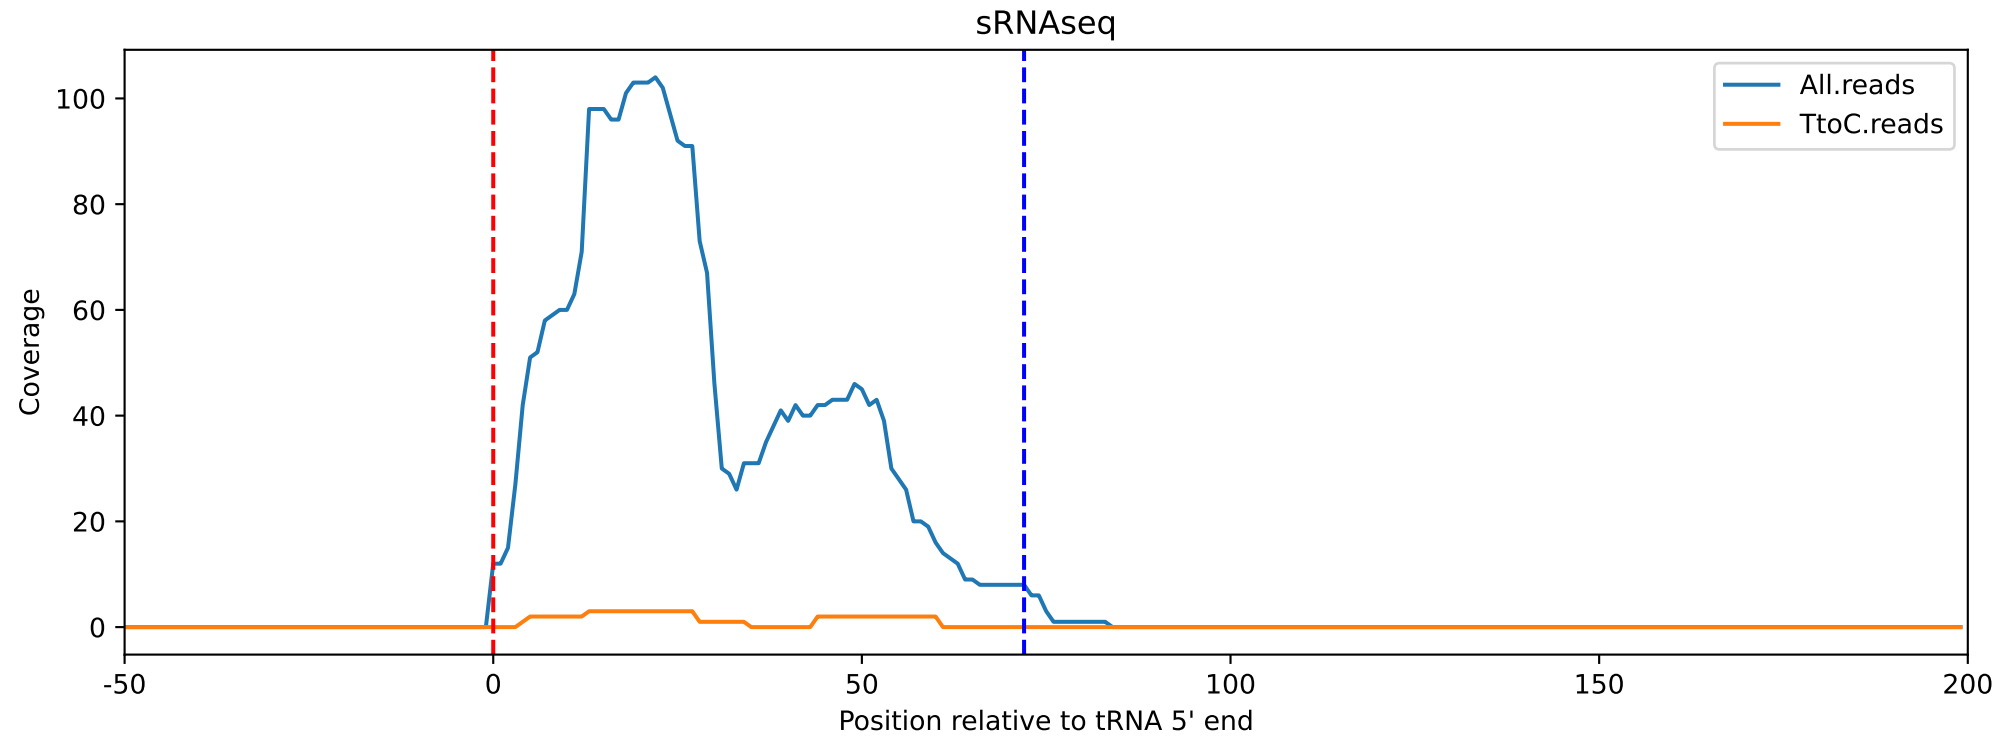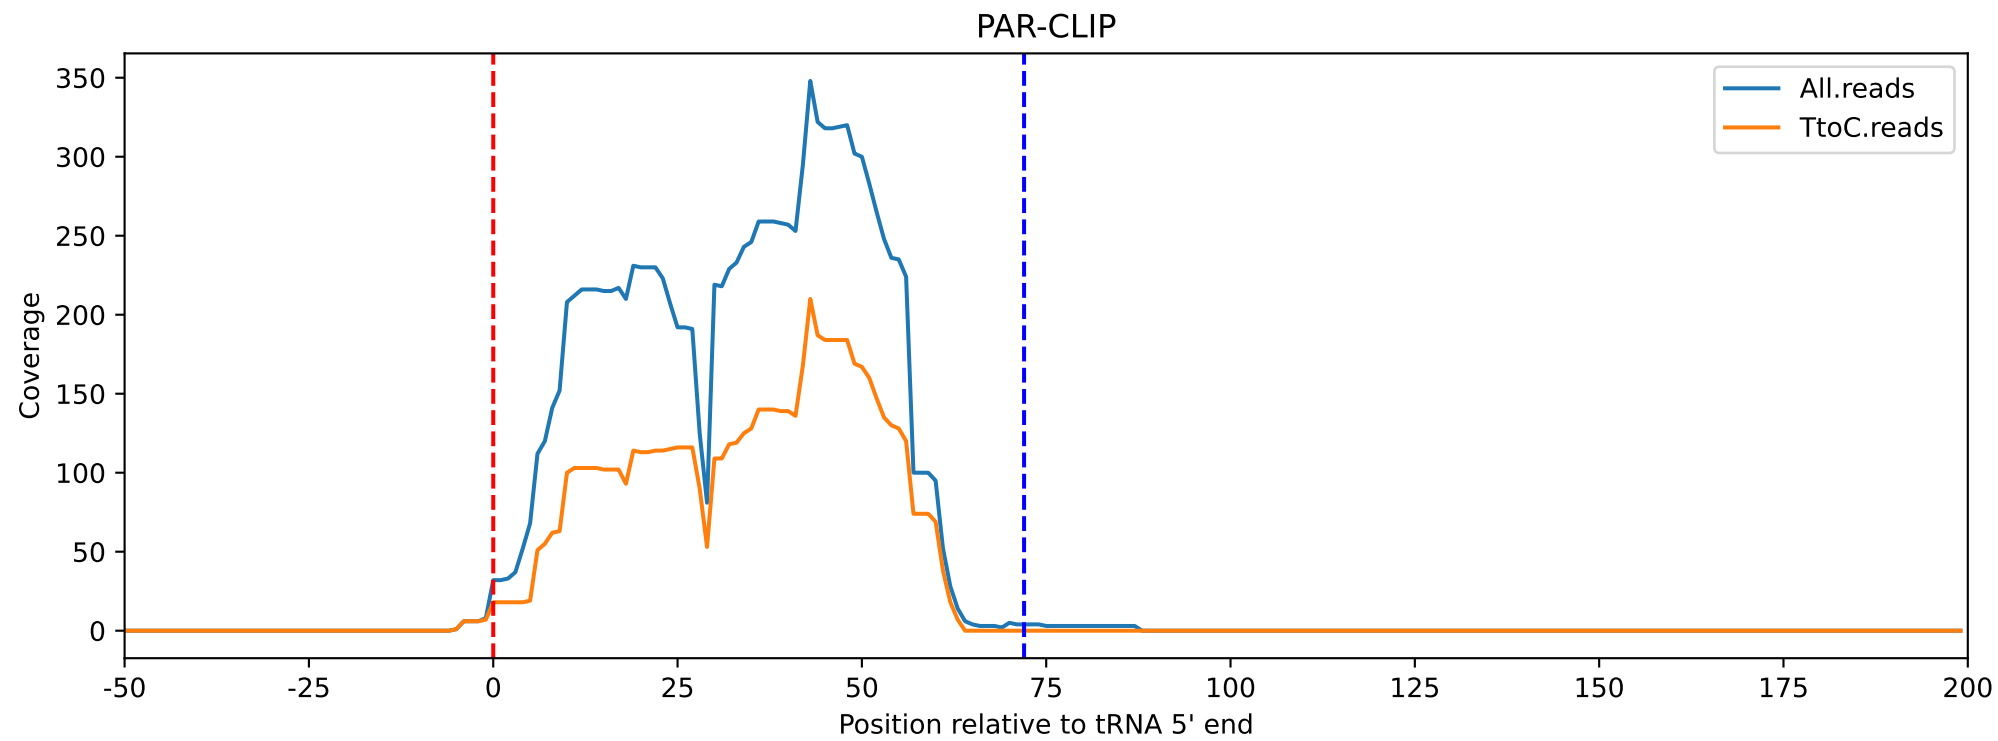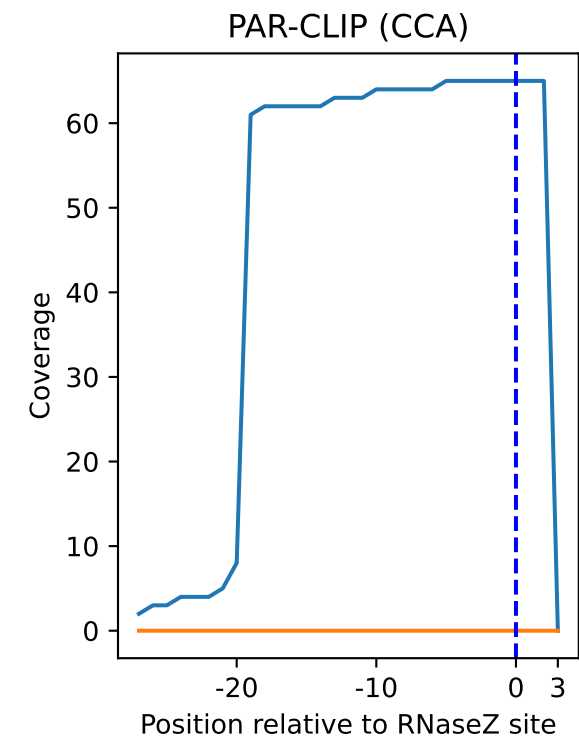

# tRNA-Met-CAT-1-4

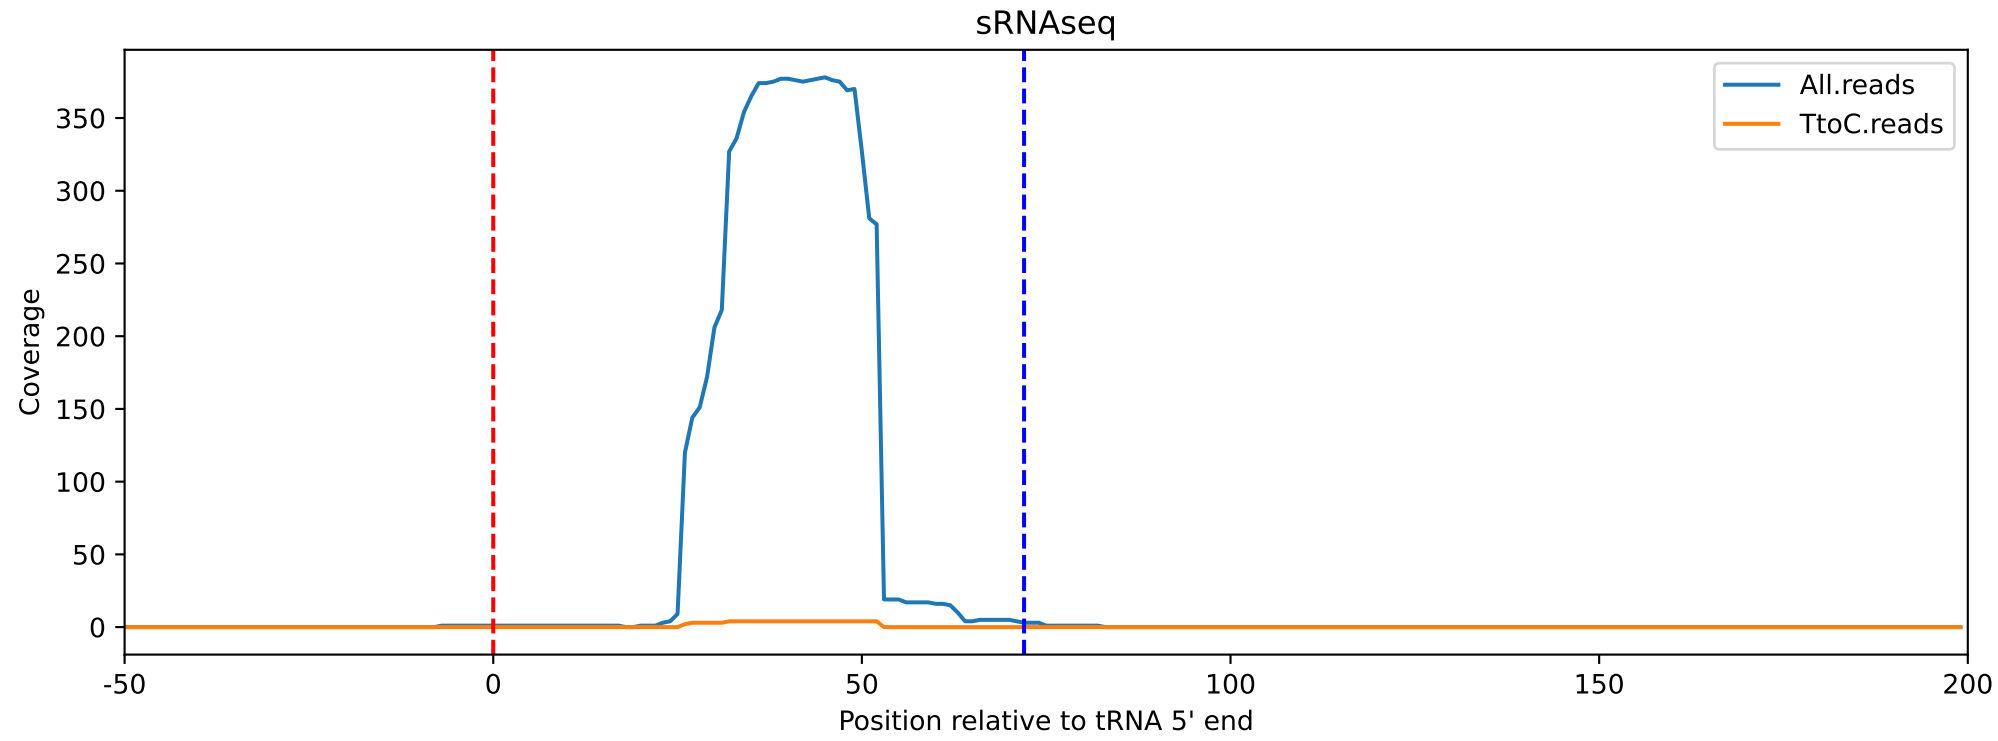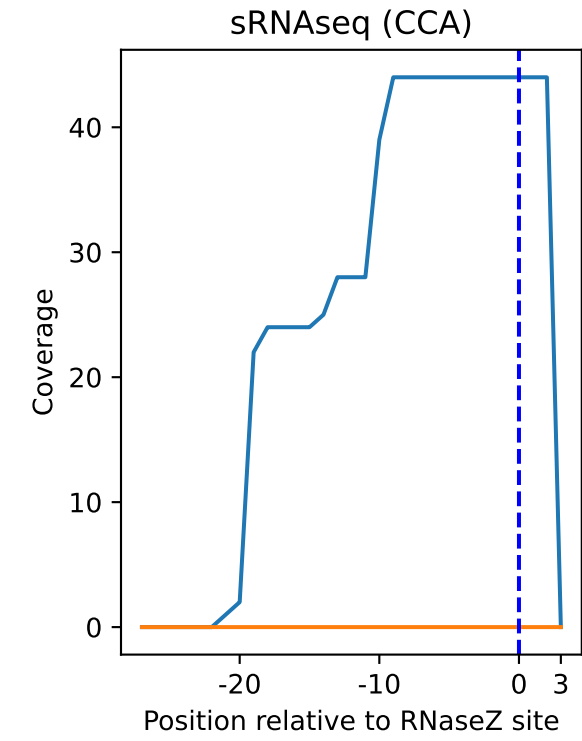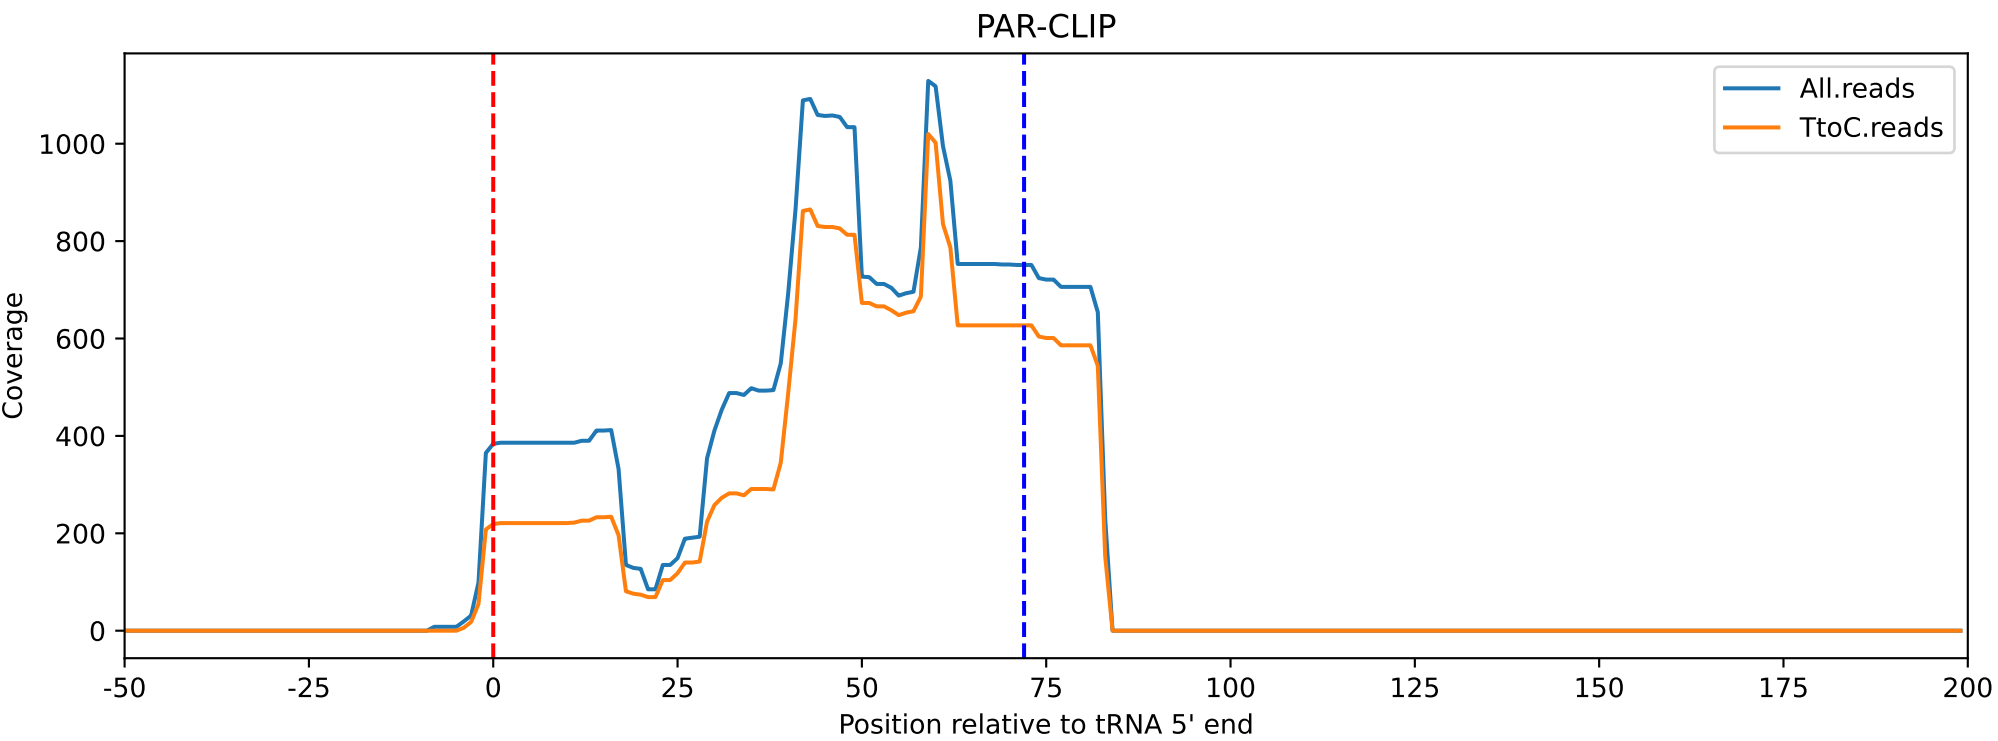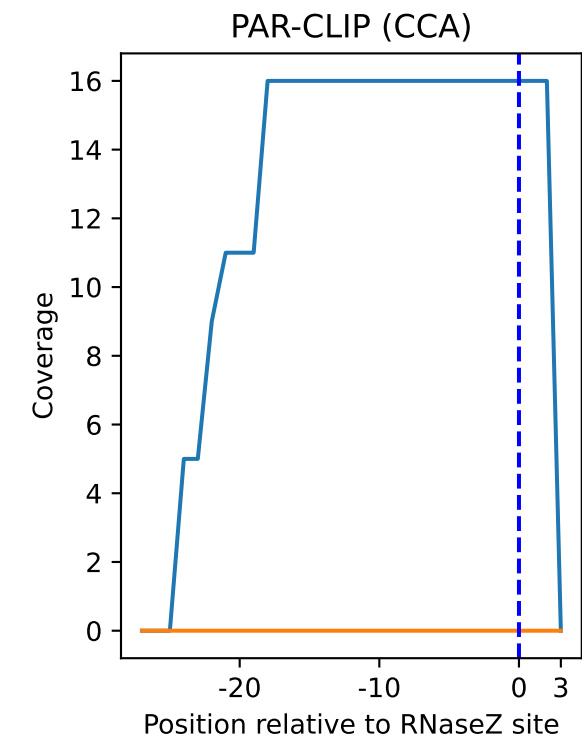

# tRNA-Leu-CAA-2-2

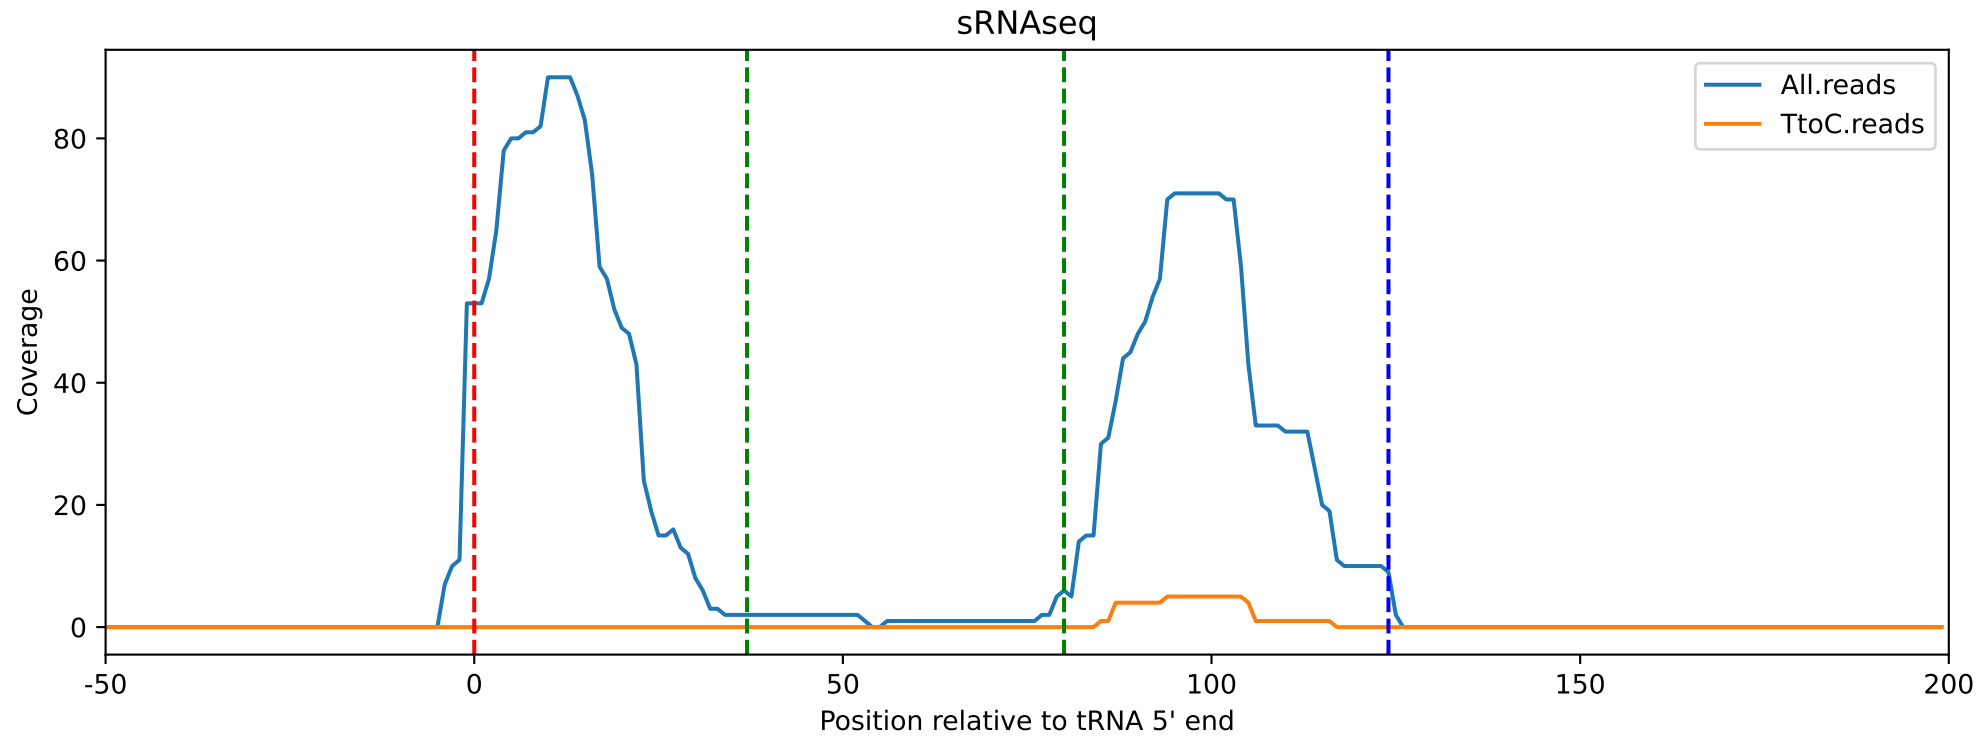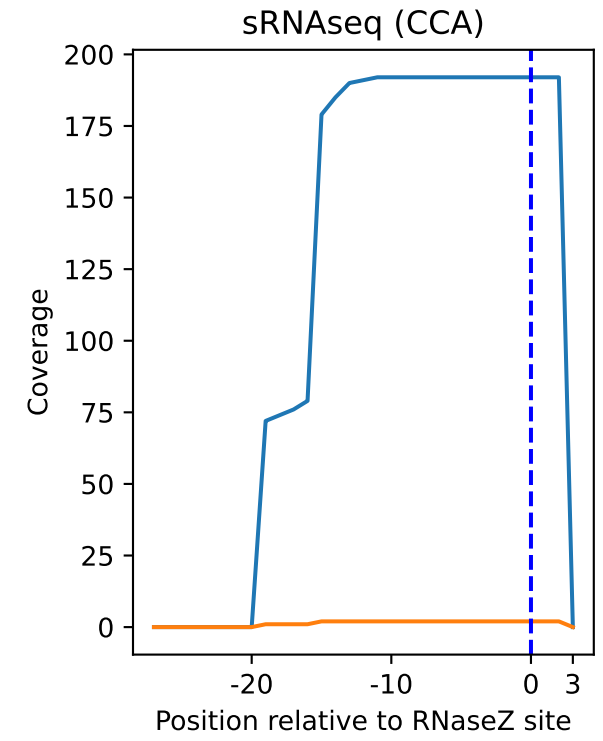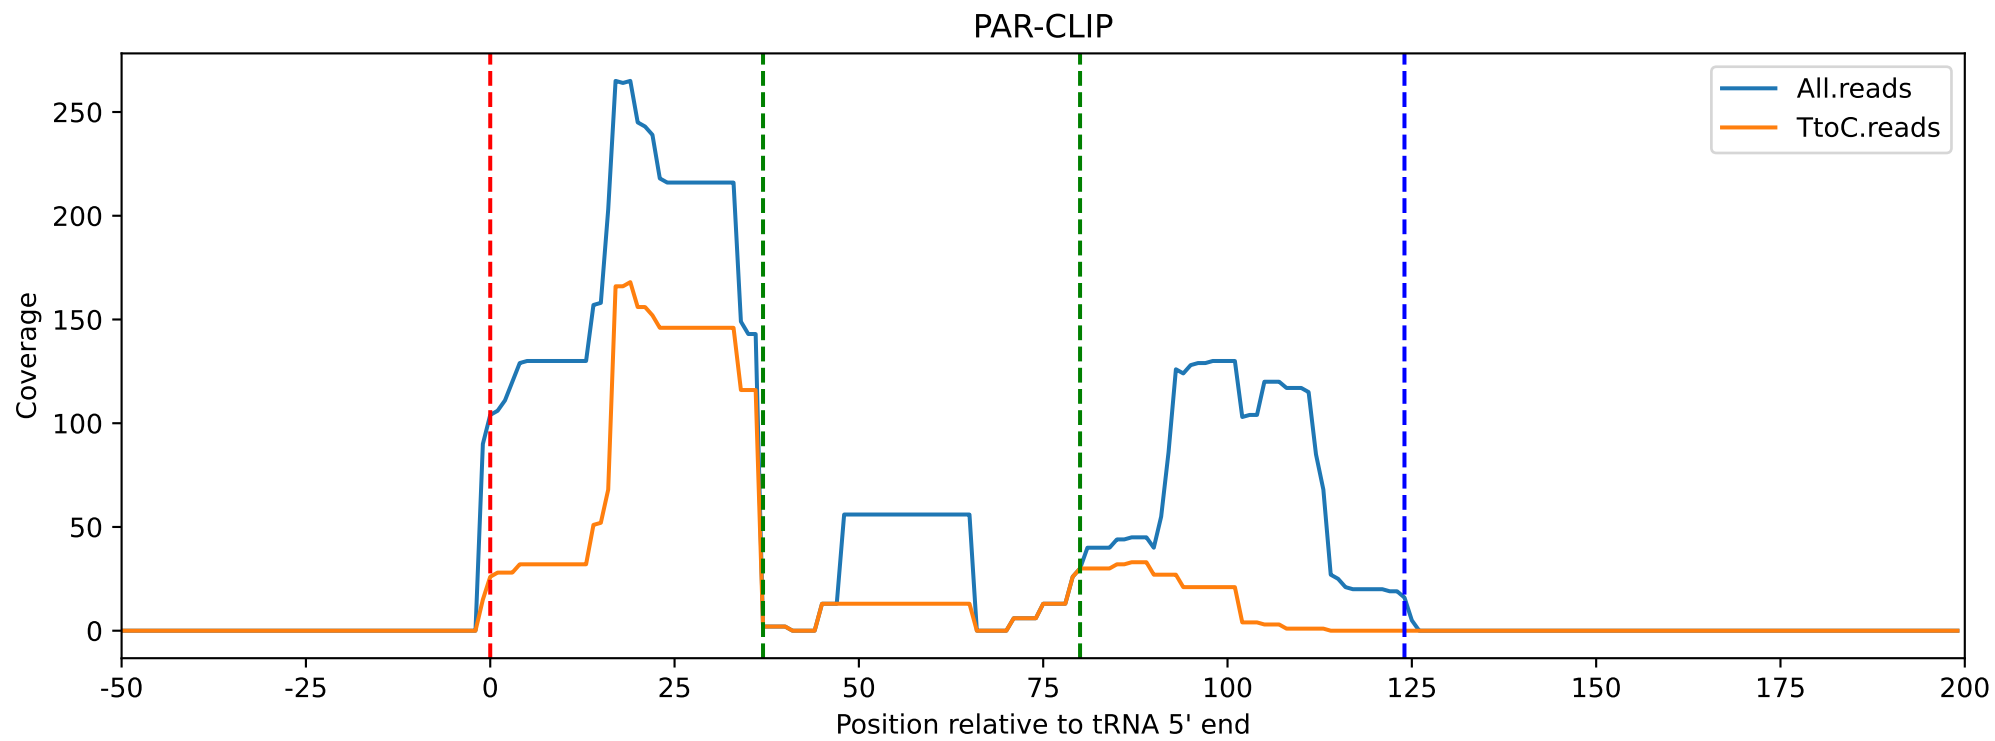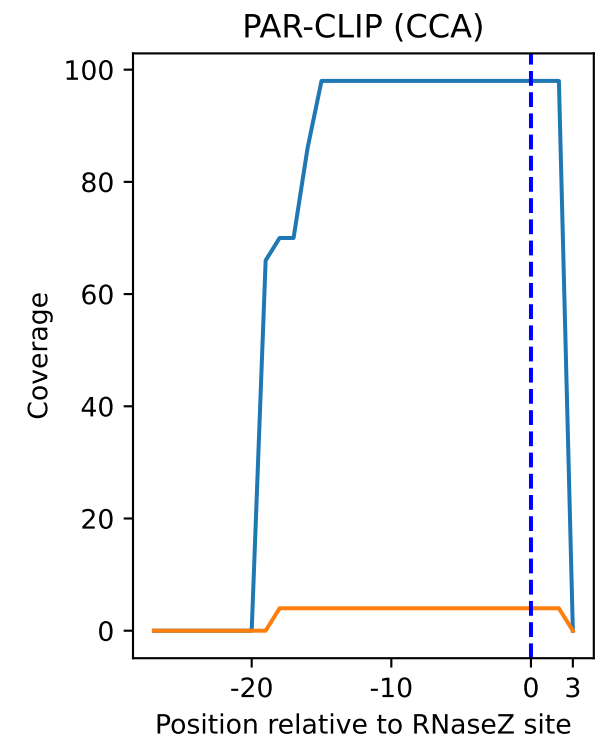

# tRNA-Gly-GCC-1-8

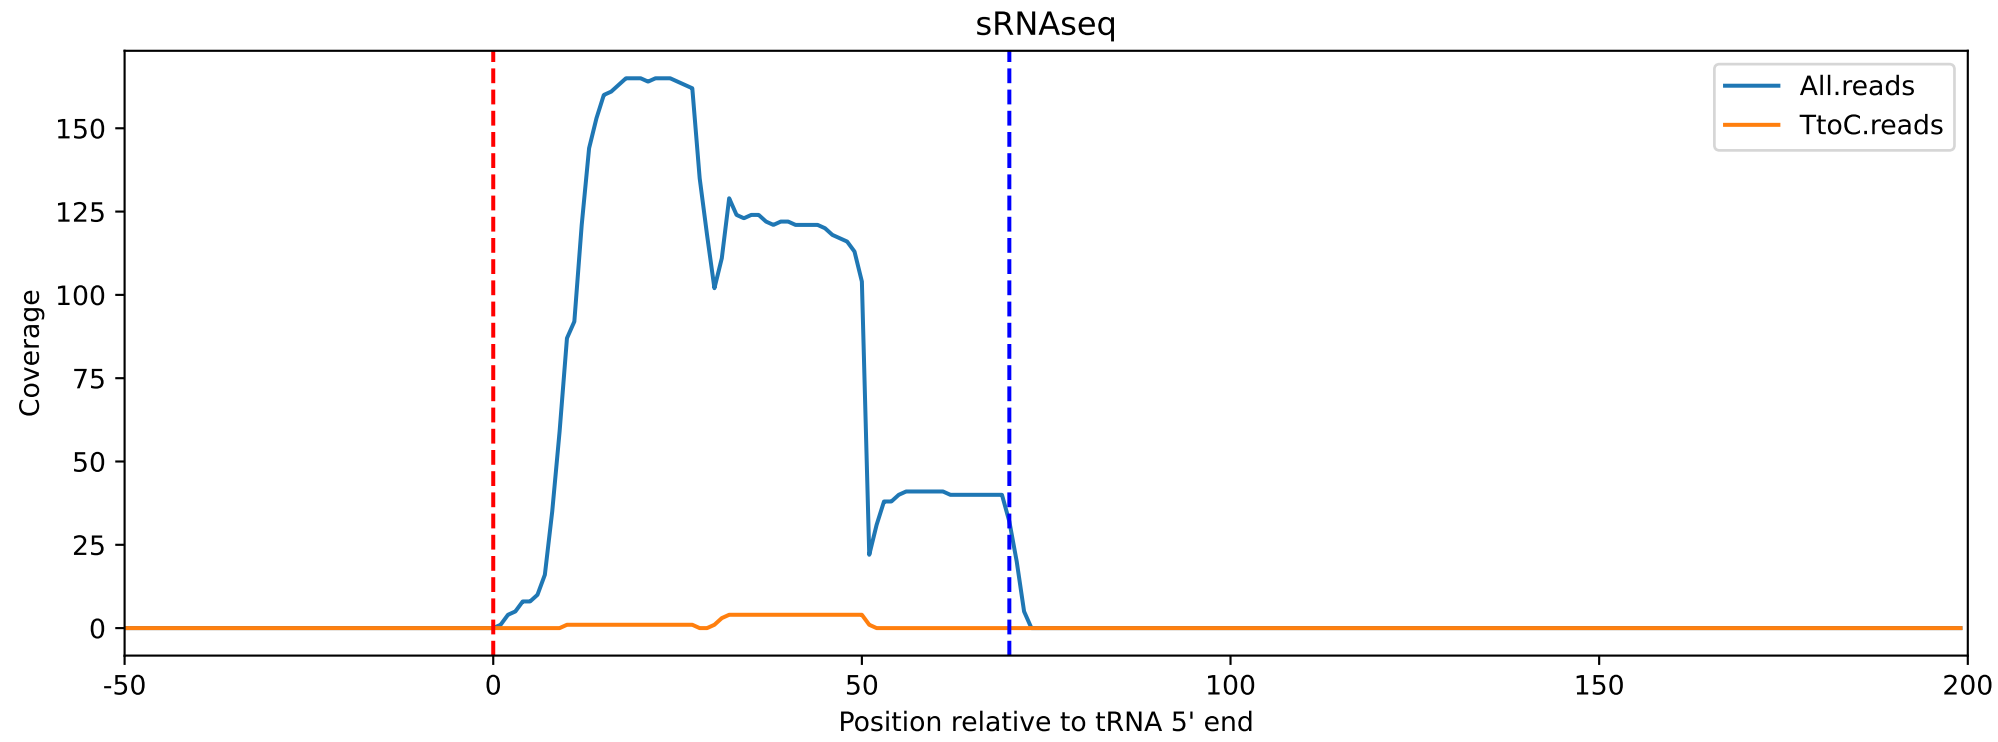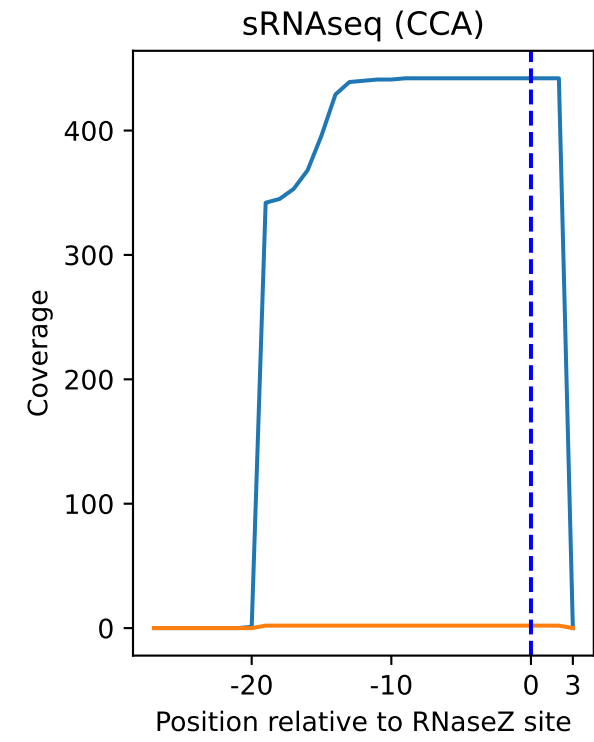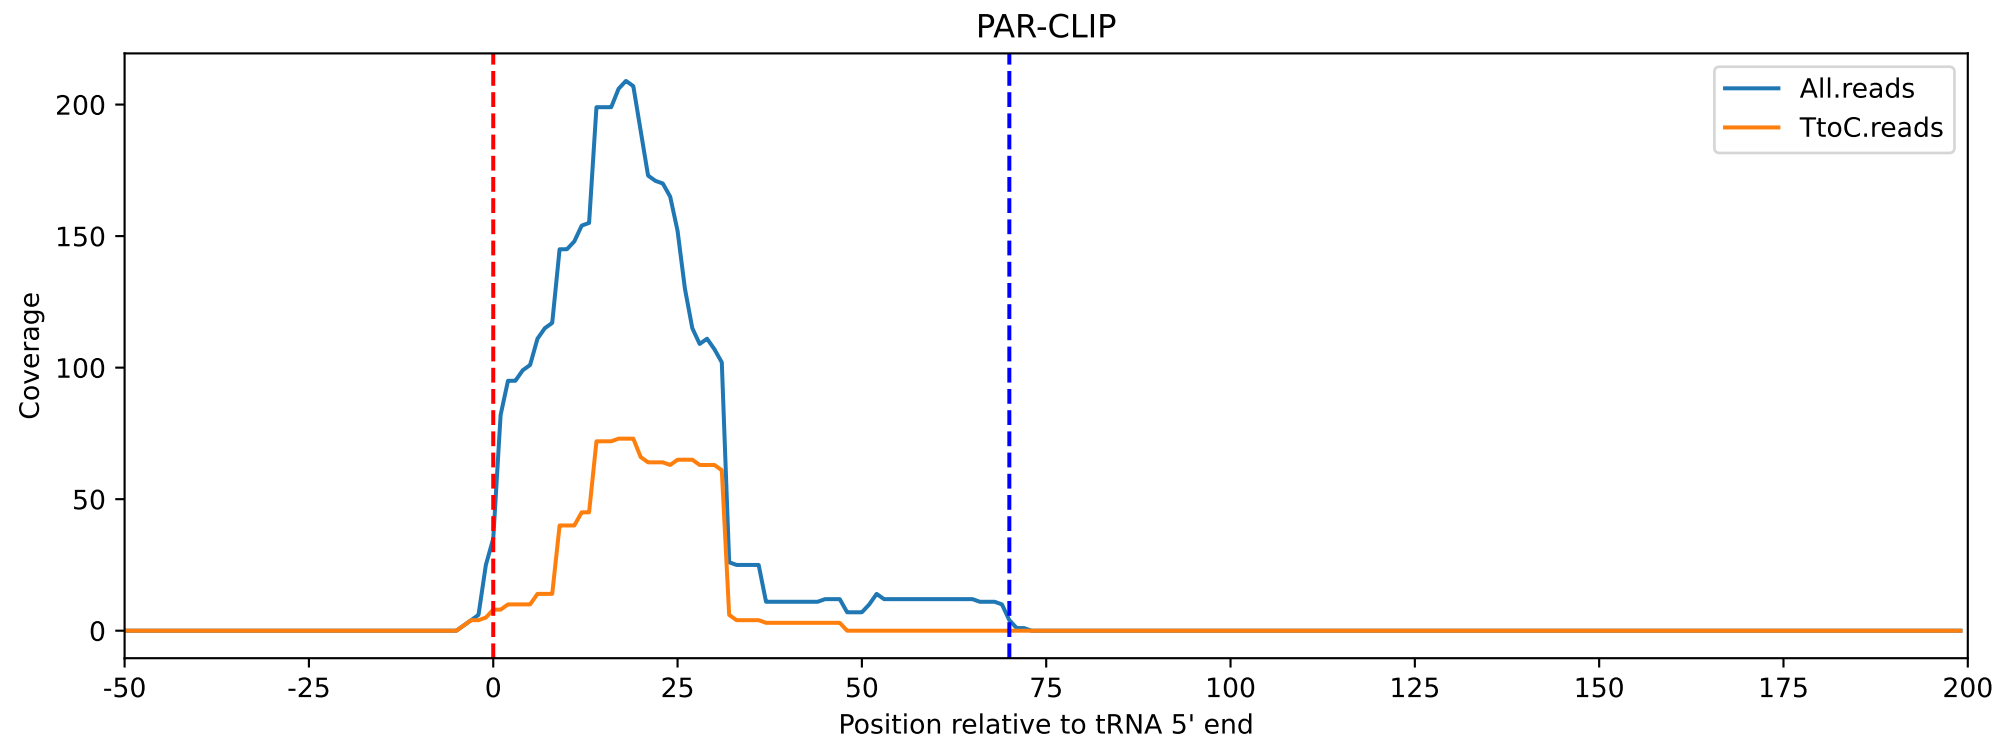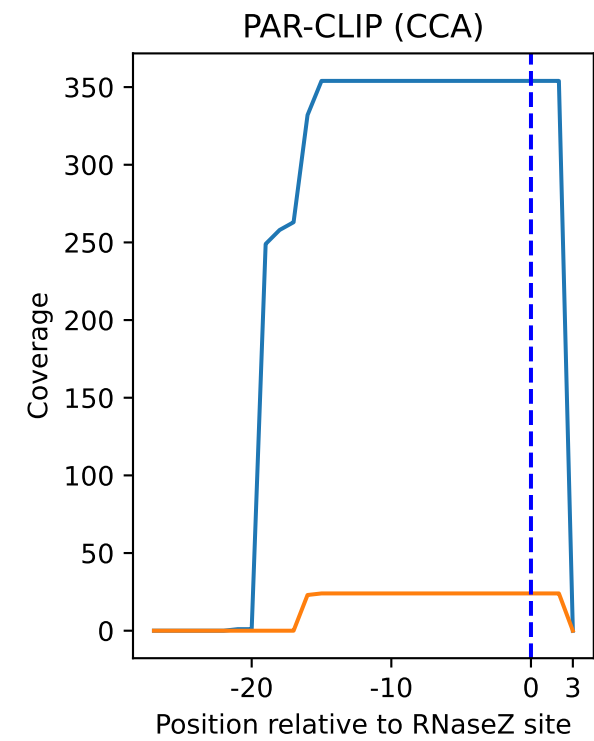

# tRNA-His-GTG-1-3

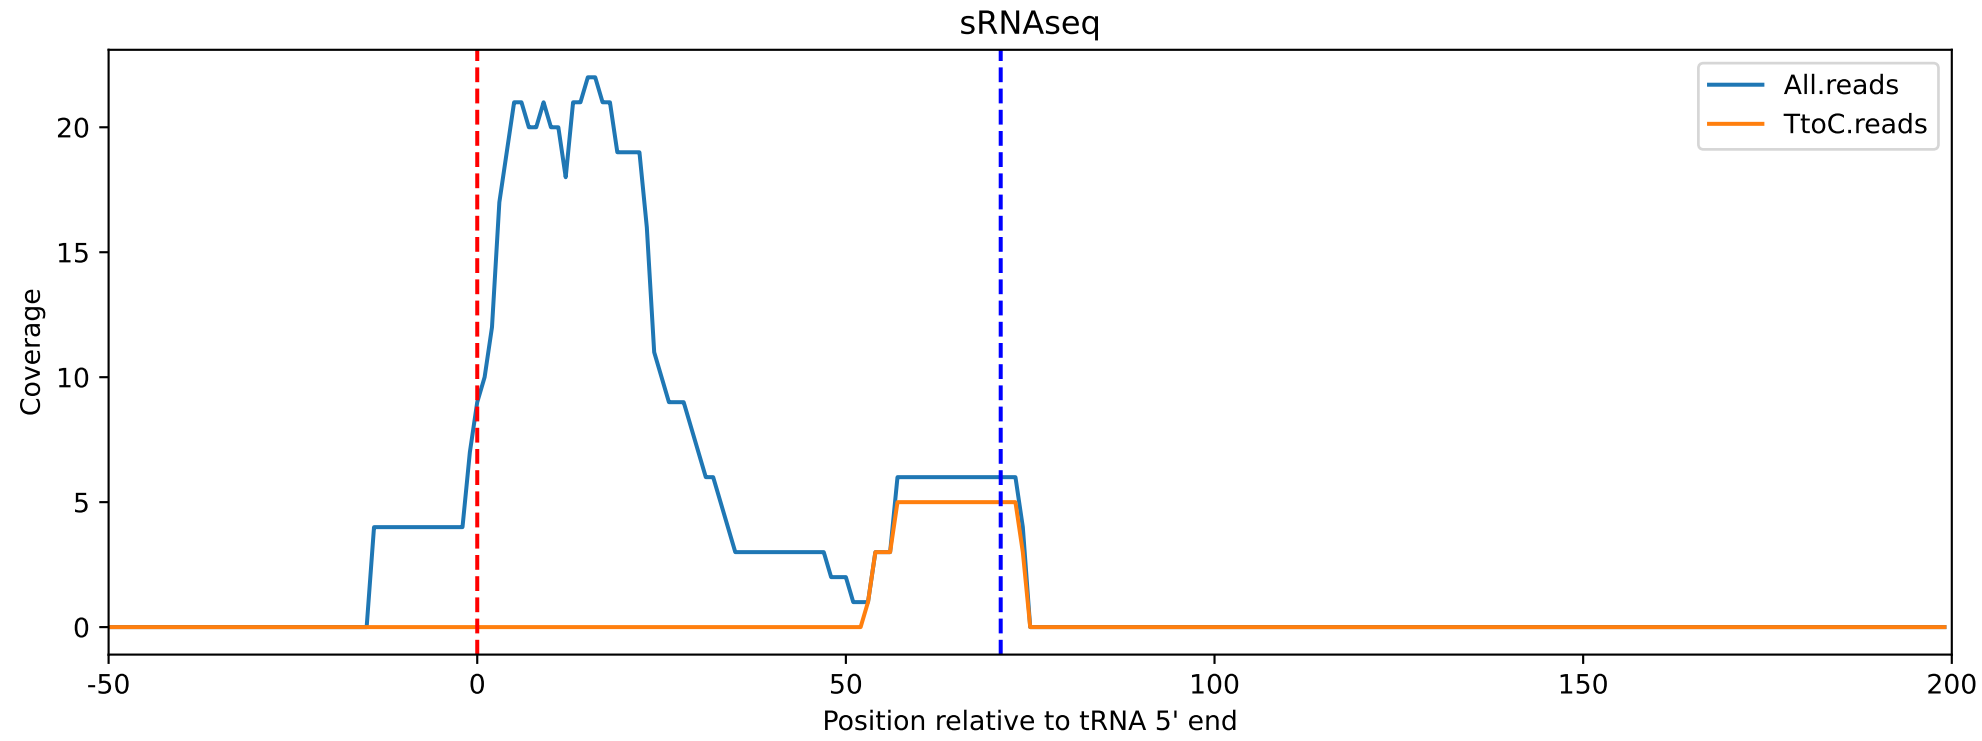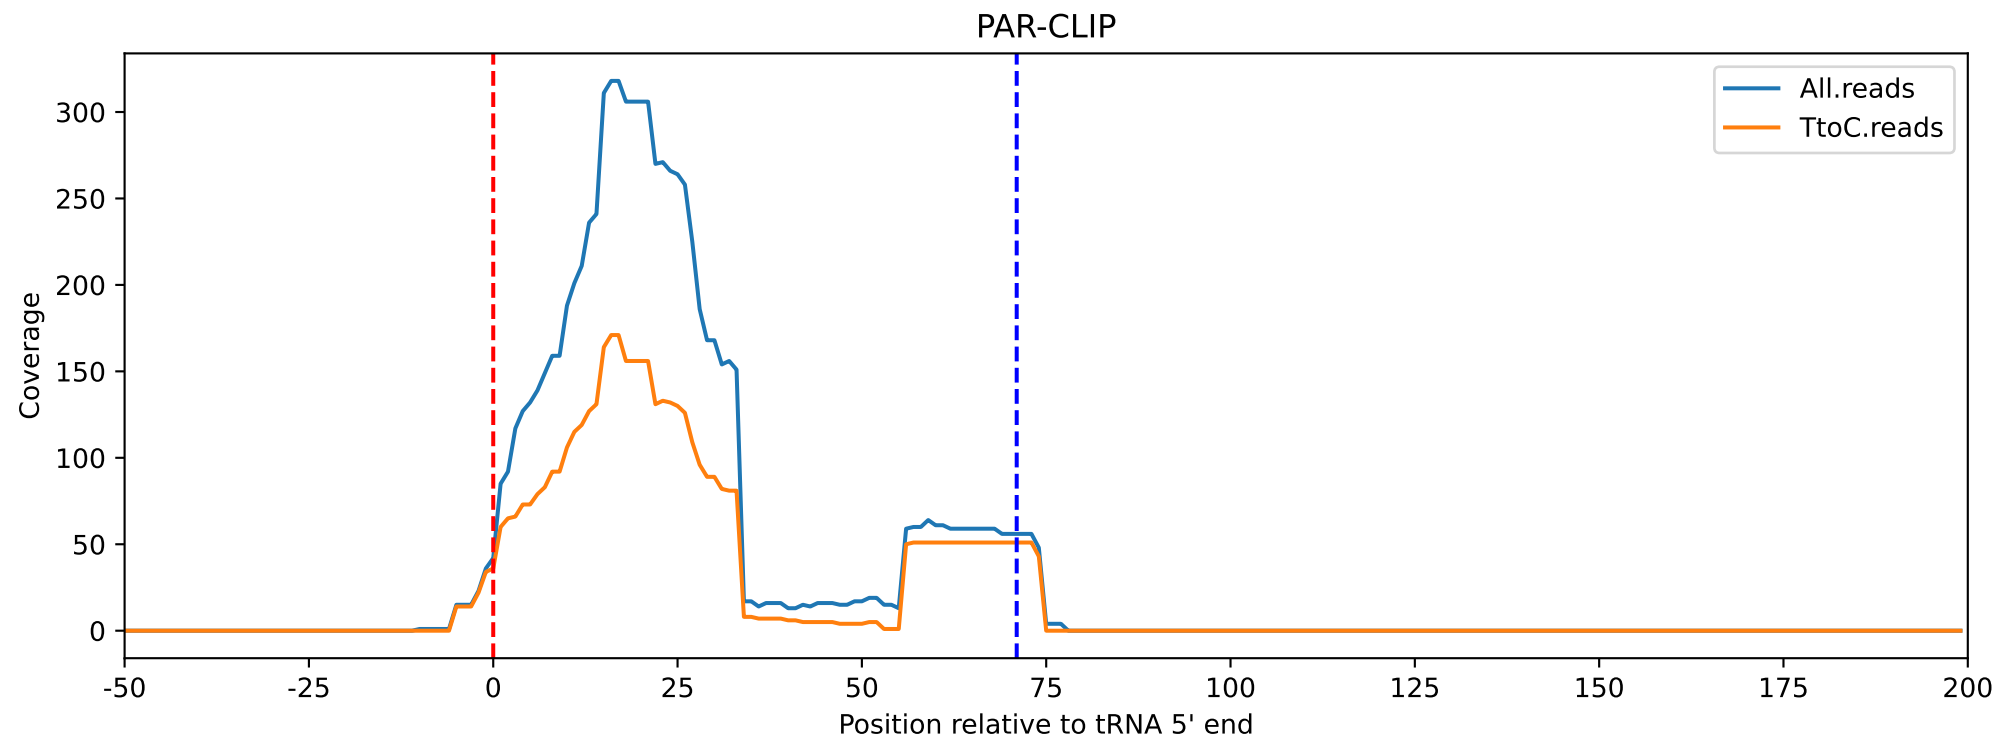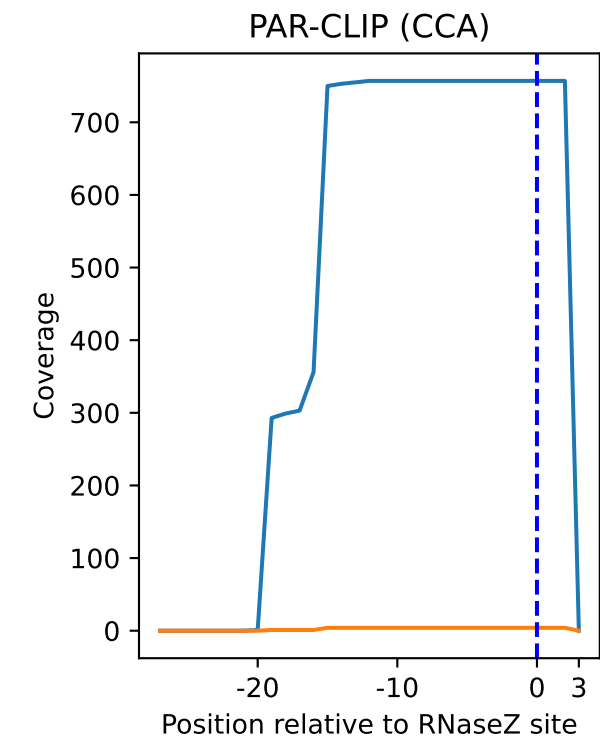



# tRNA-Gly-GCC-1-2

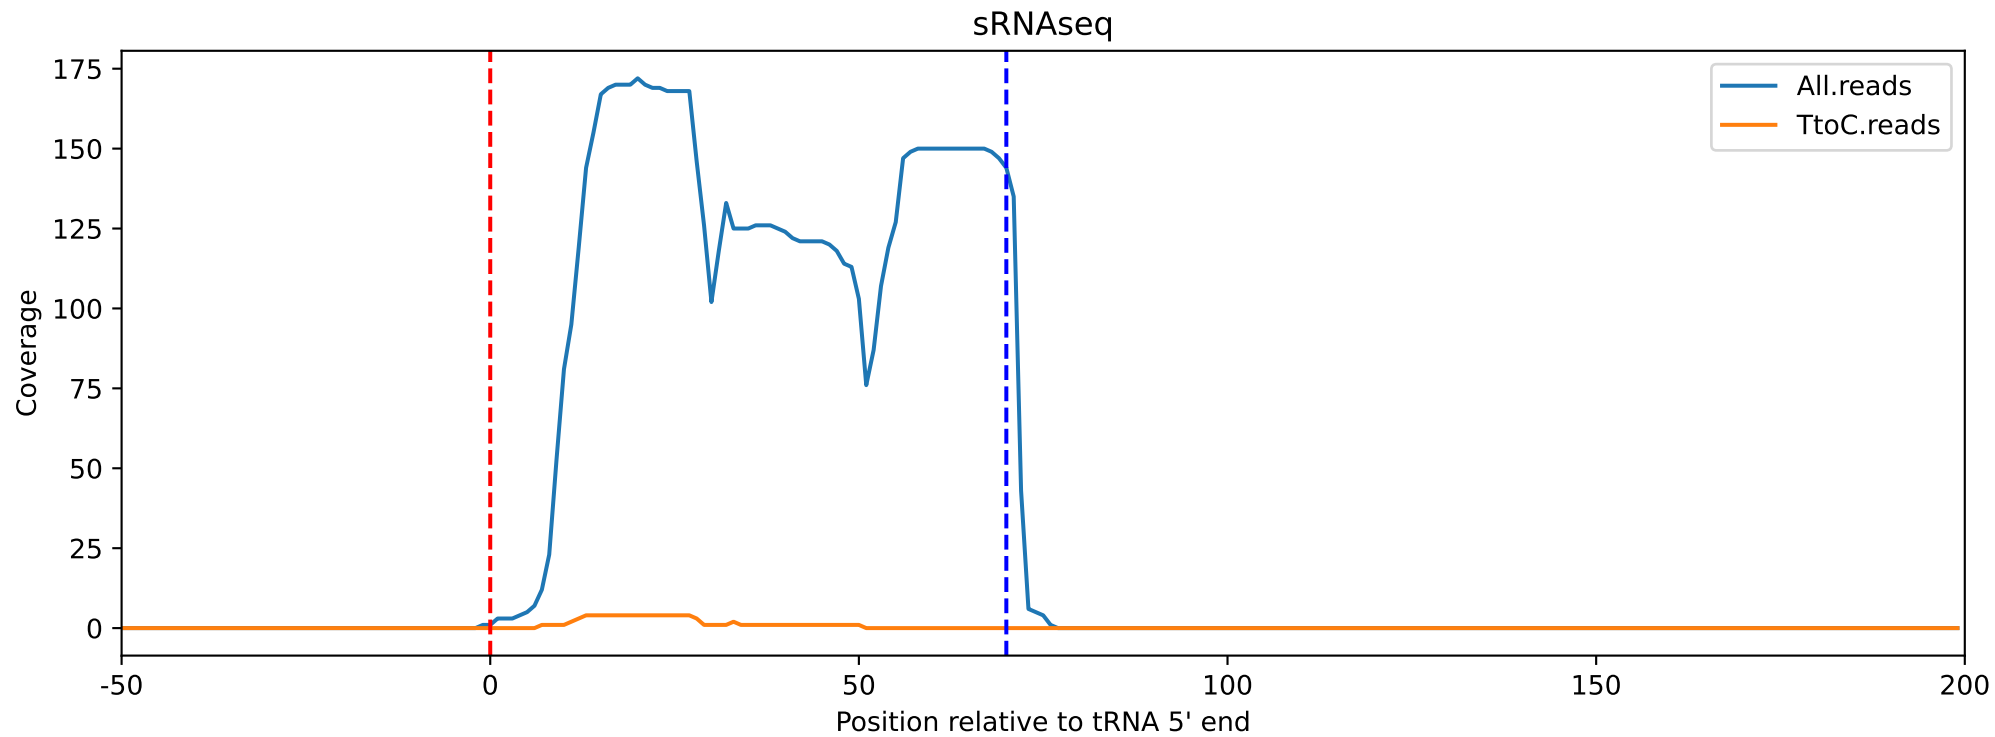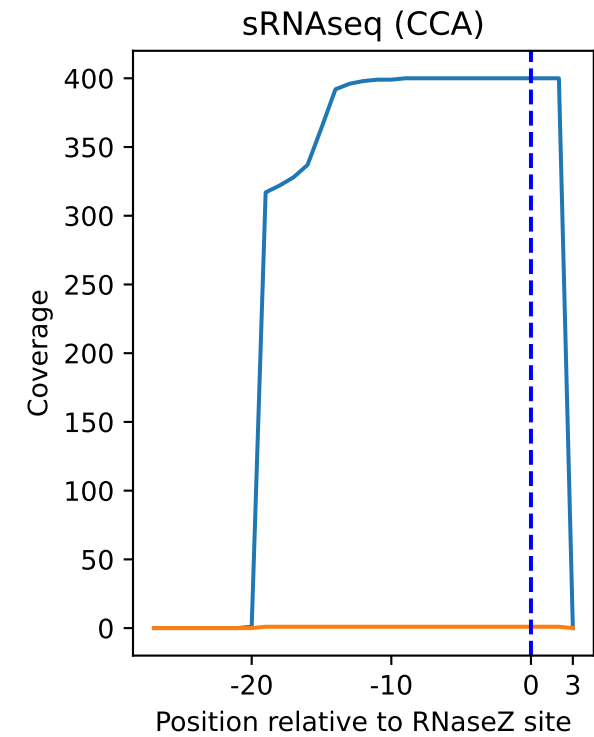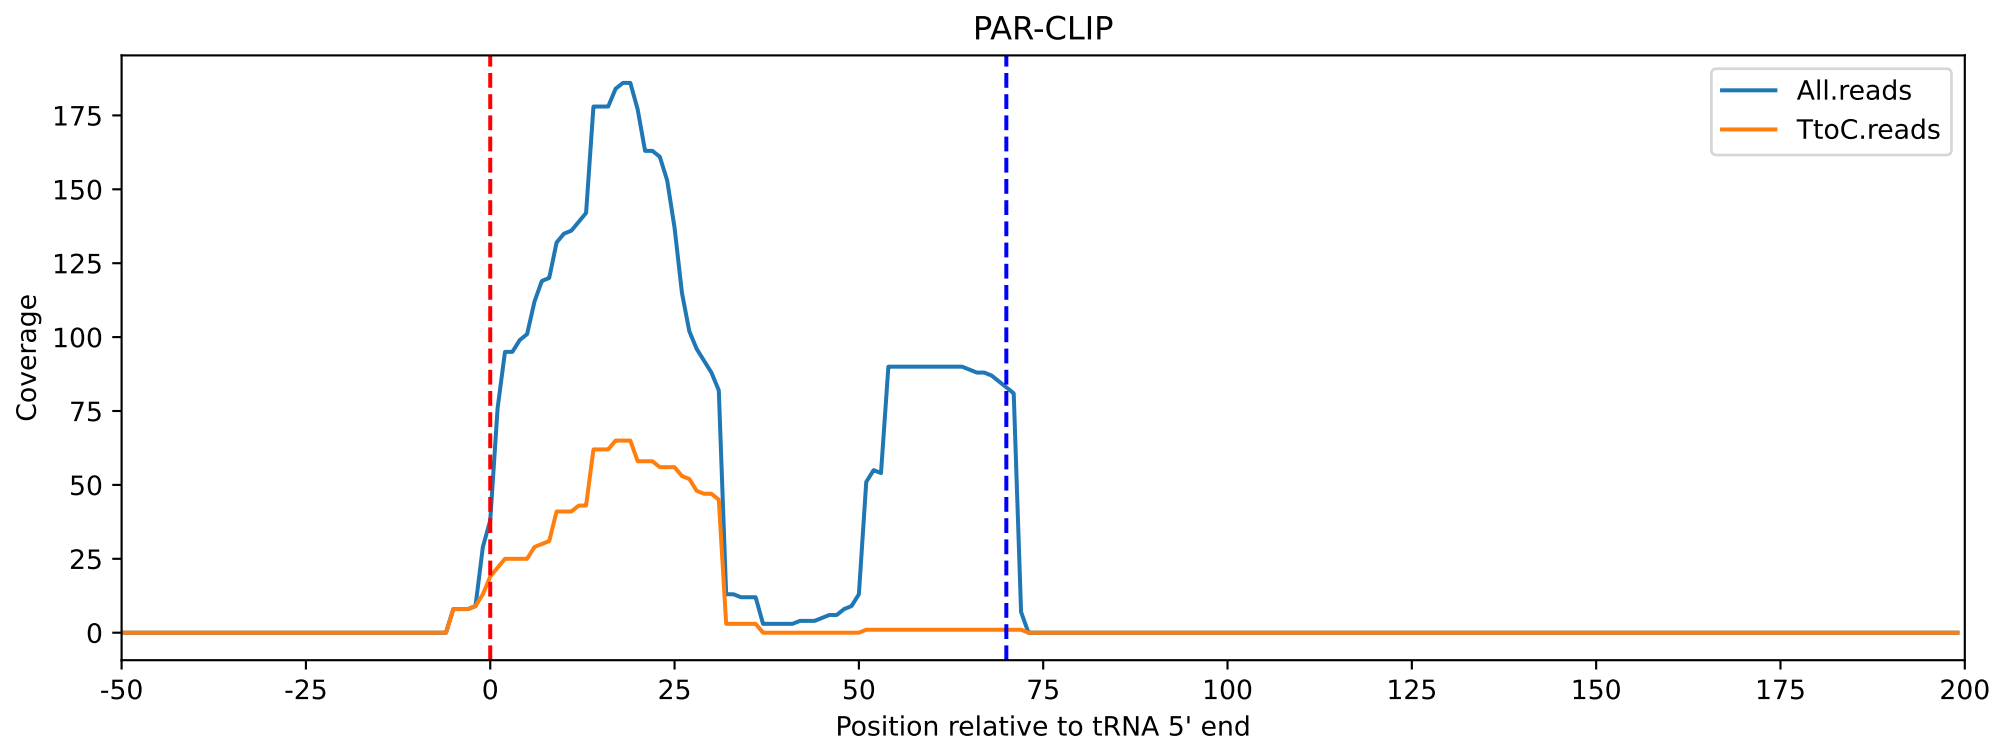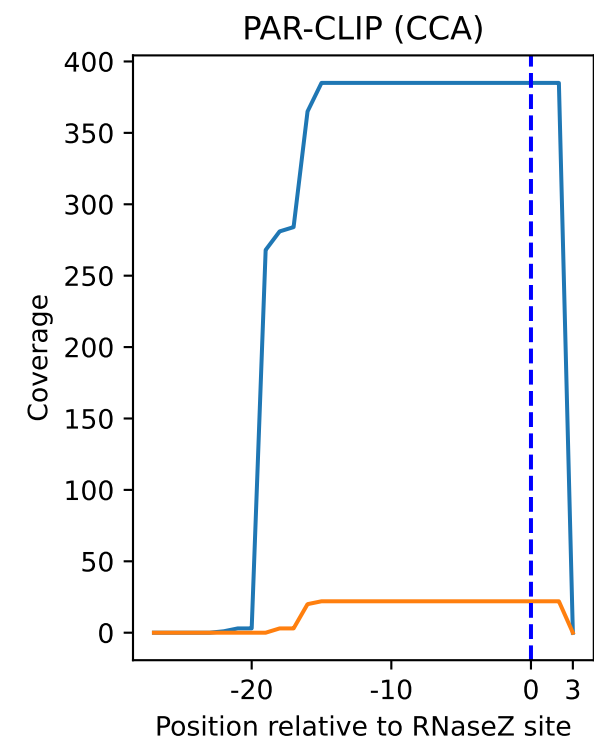

# tRNA-Asp-GTC-3-1

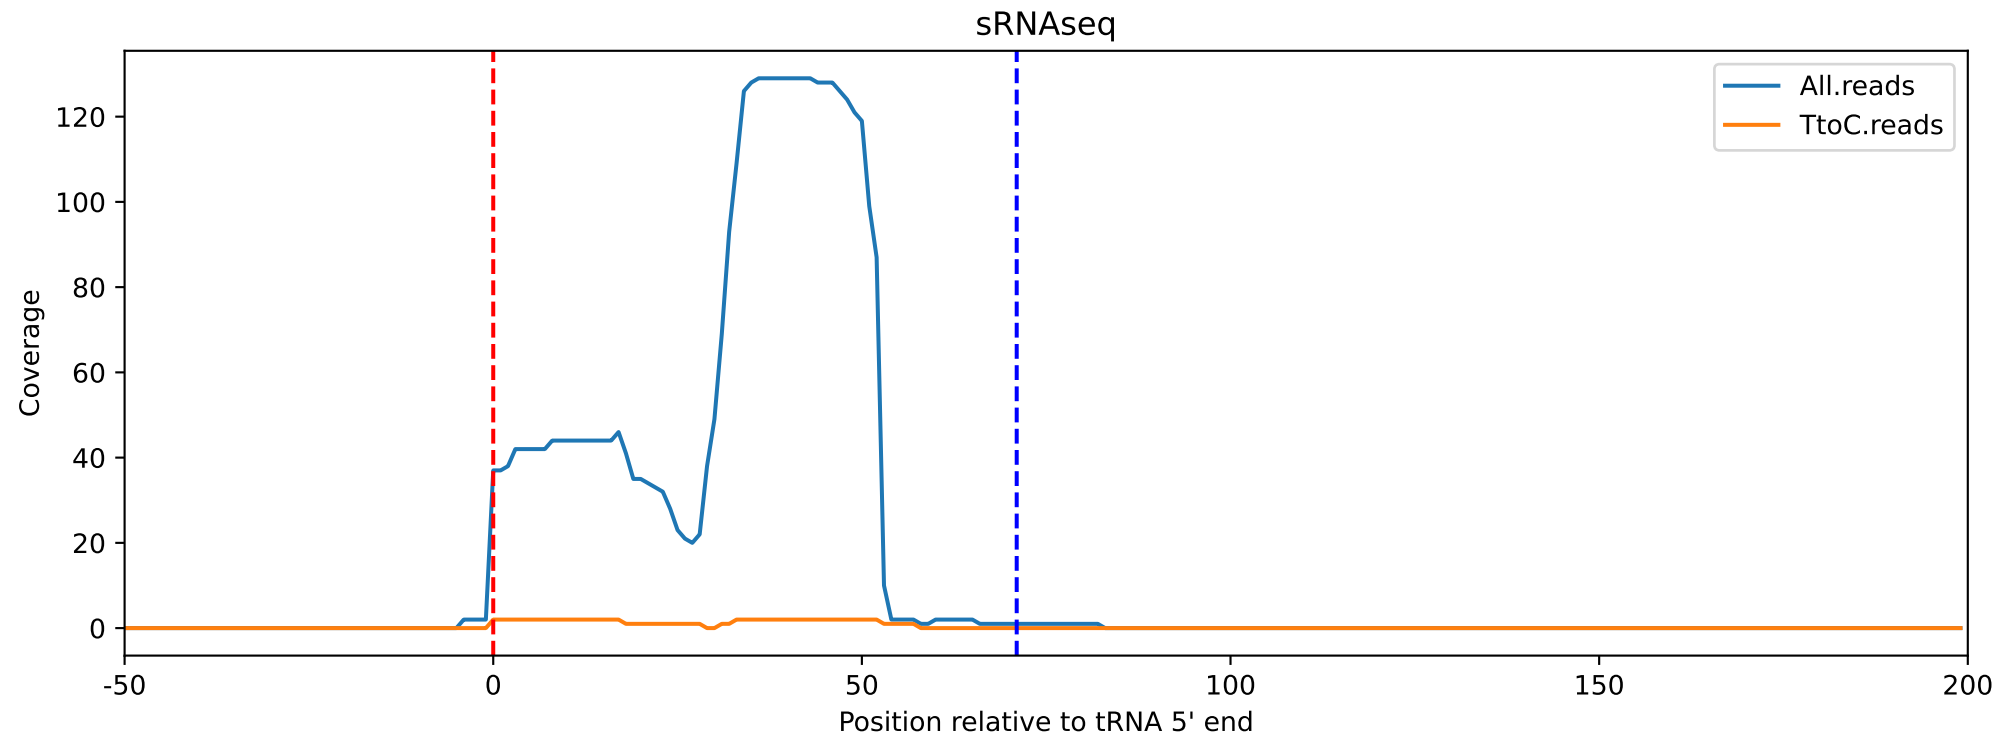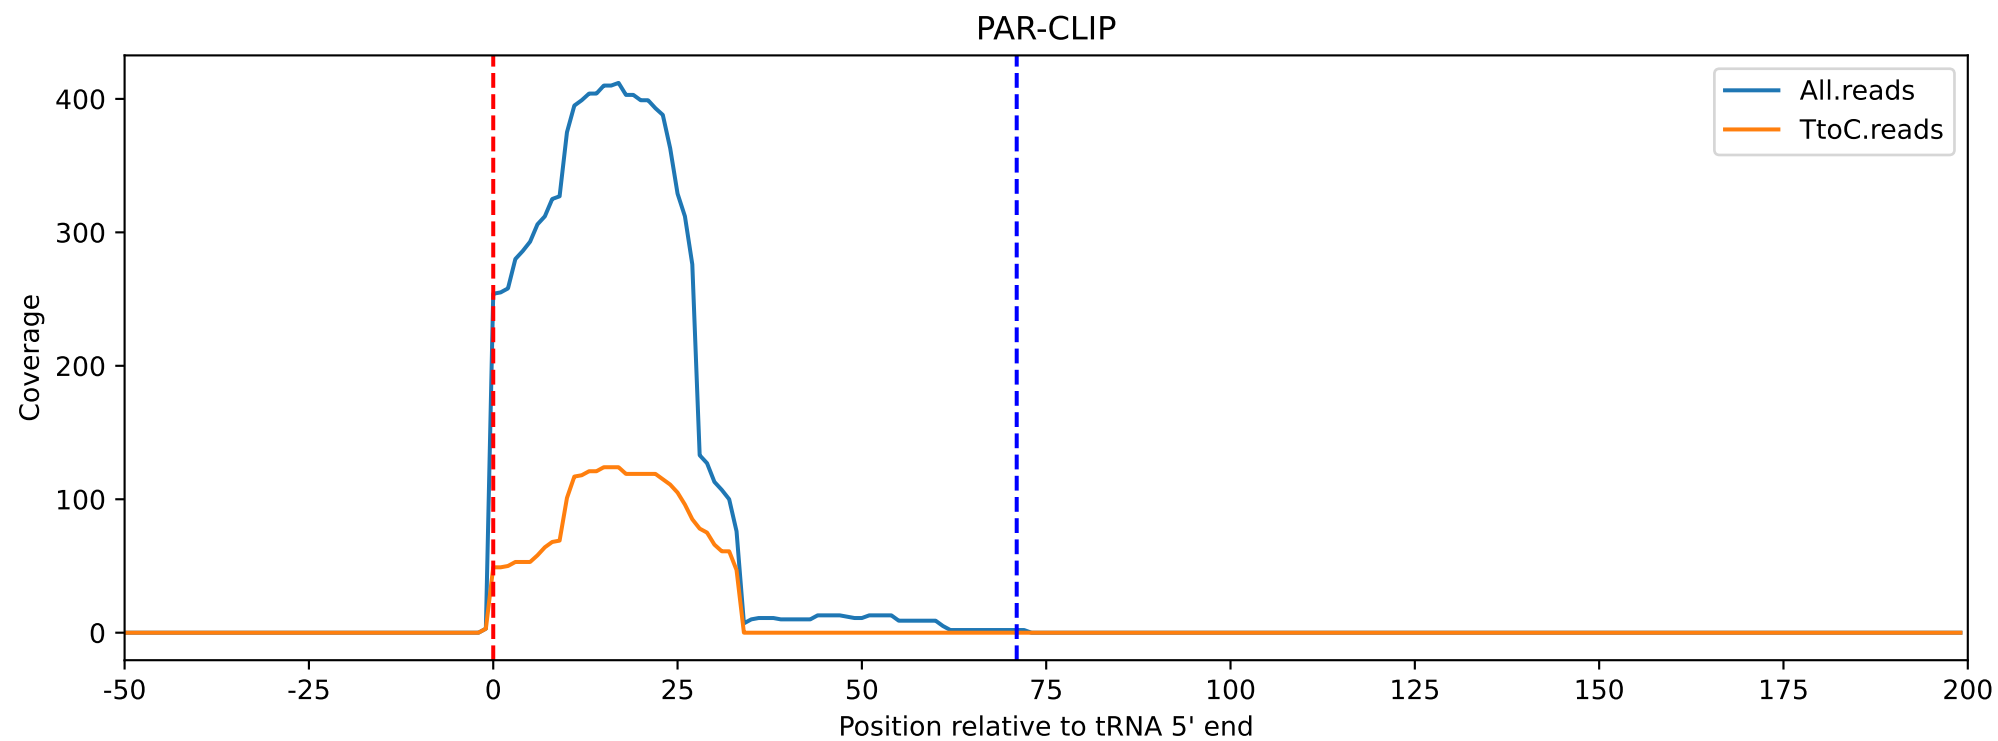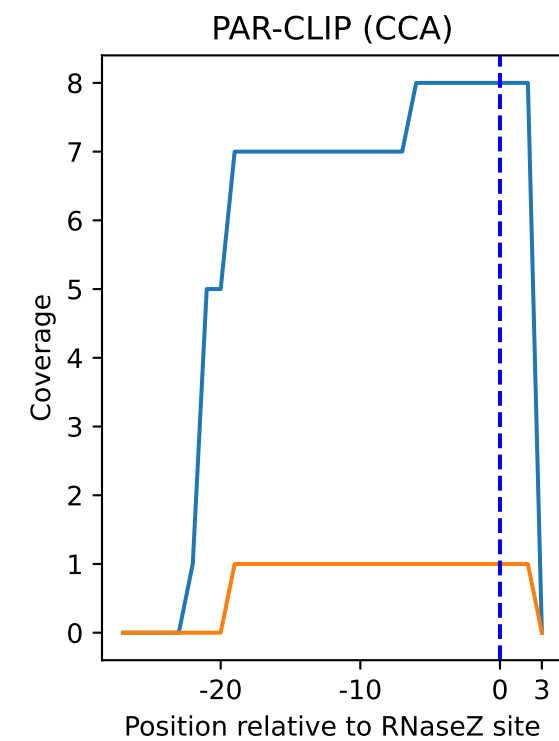

# tRNA-Cys-GCA-3-1

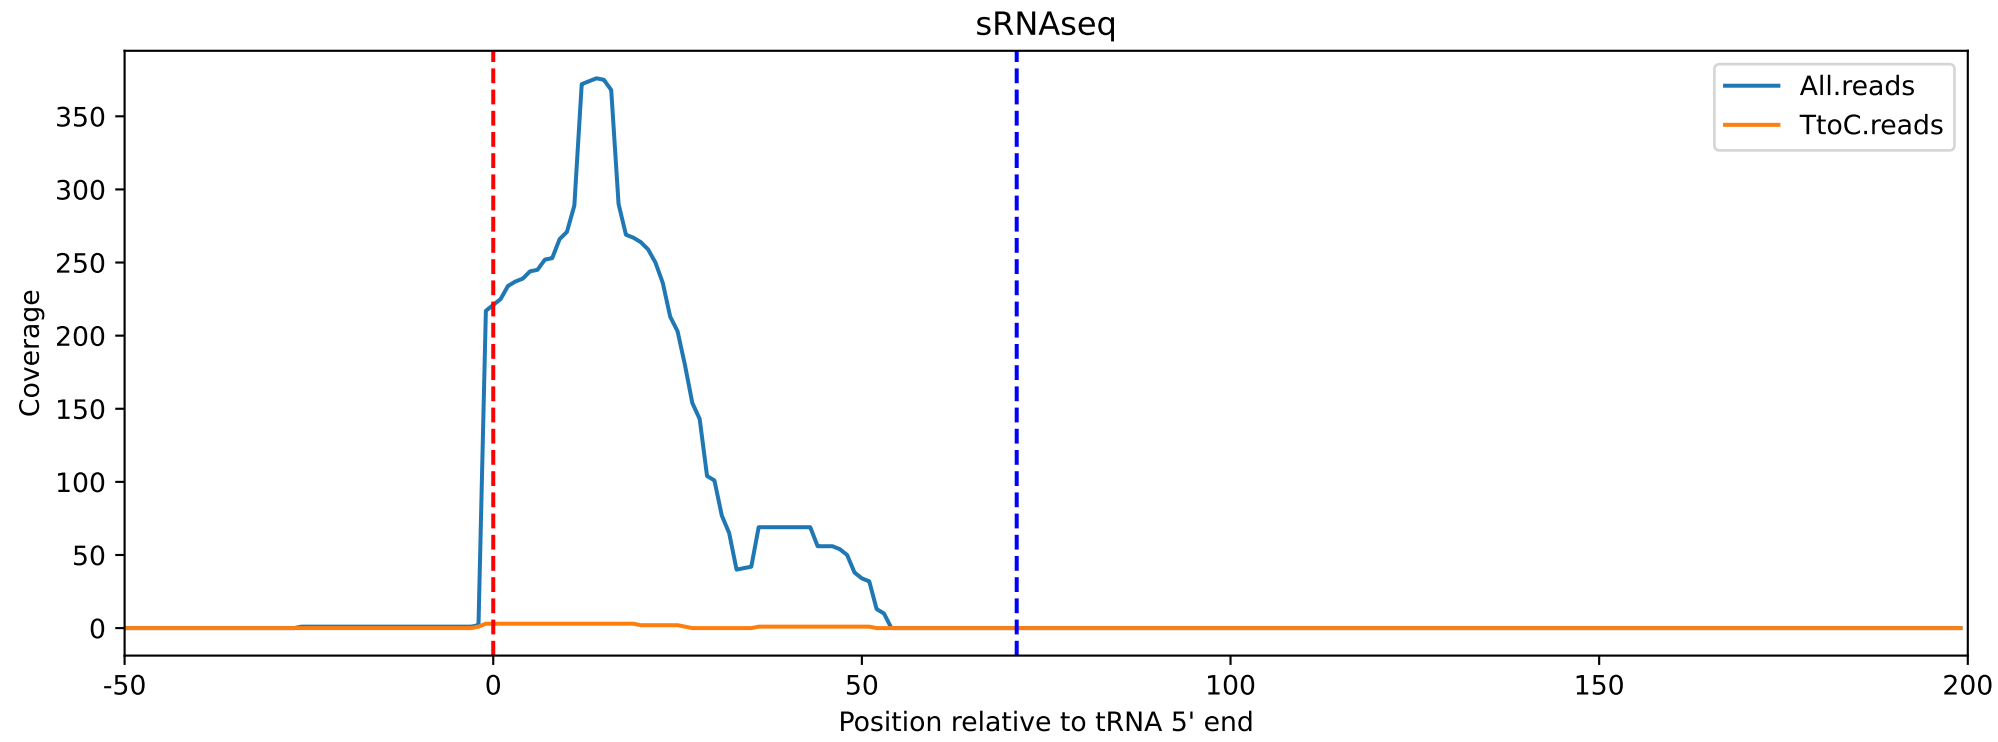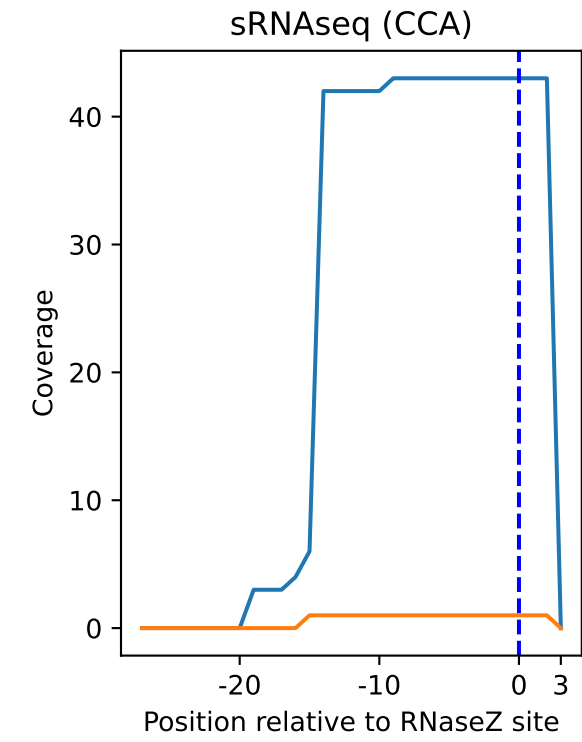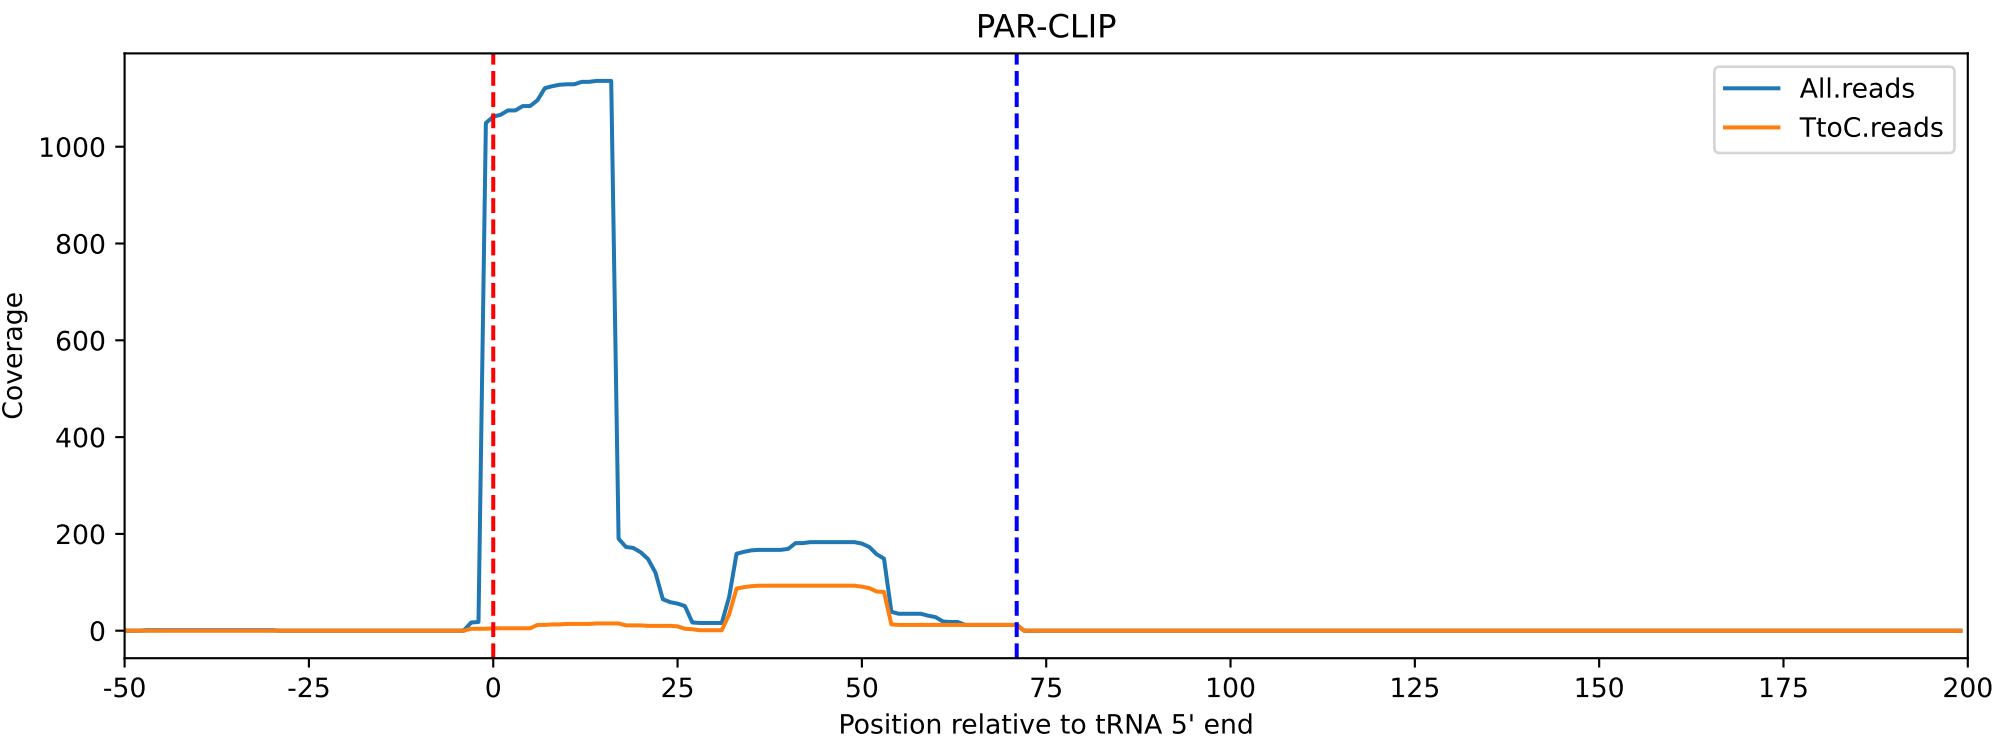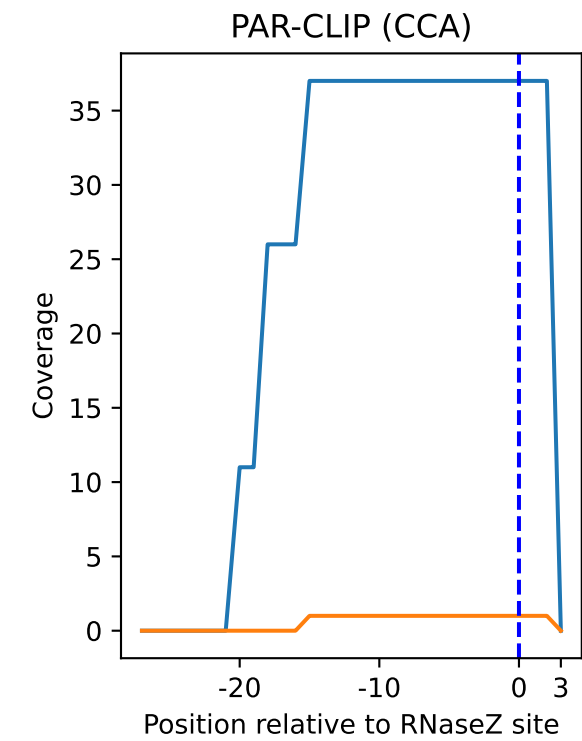

# tRNA-Asp-GTC-1-5

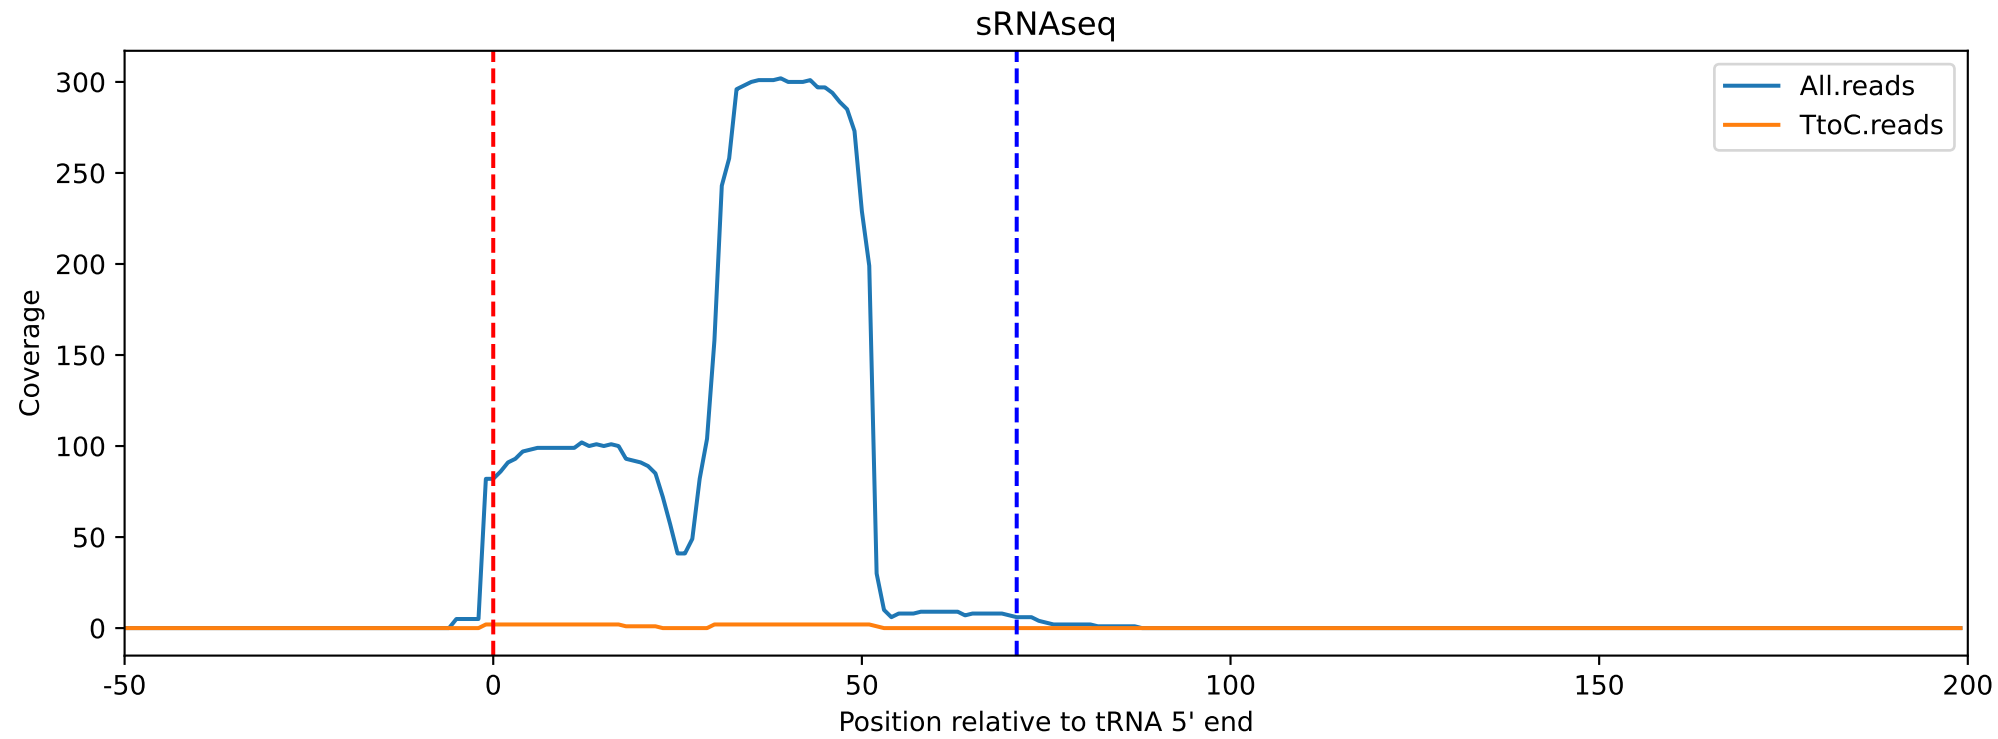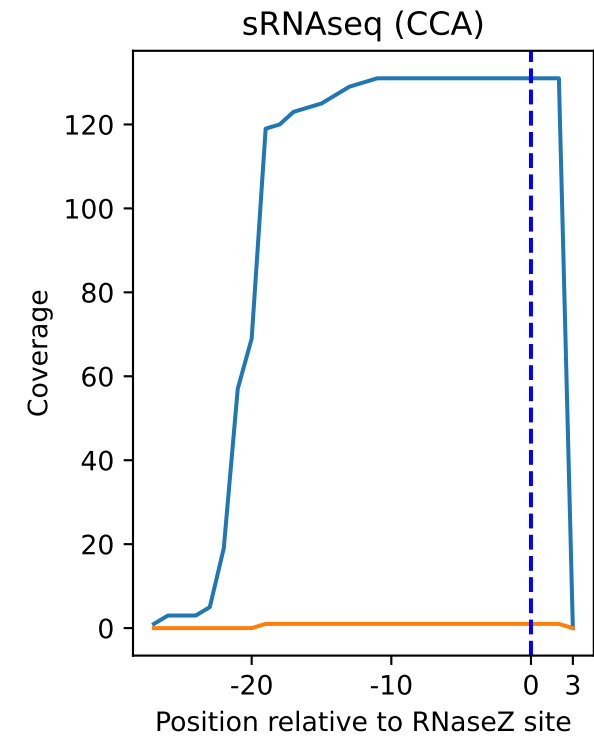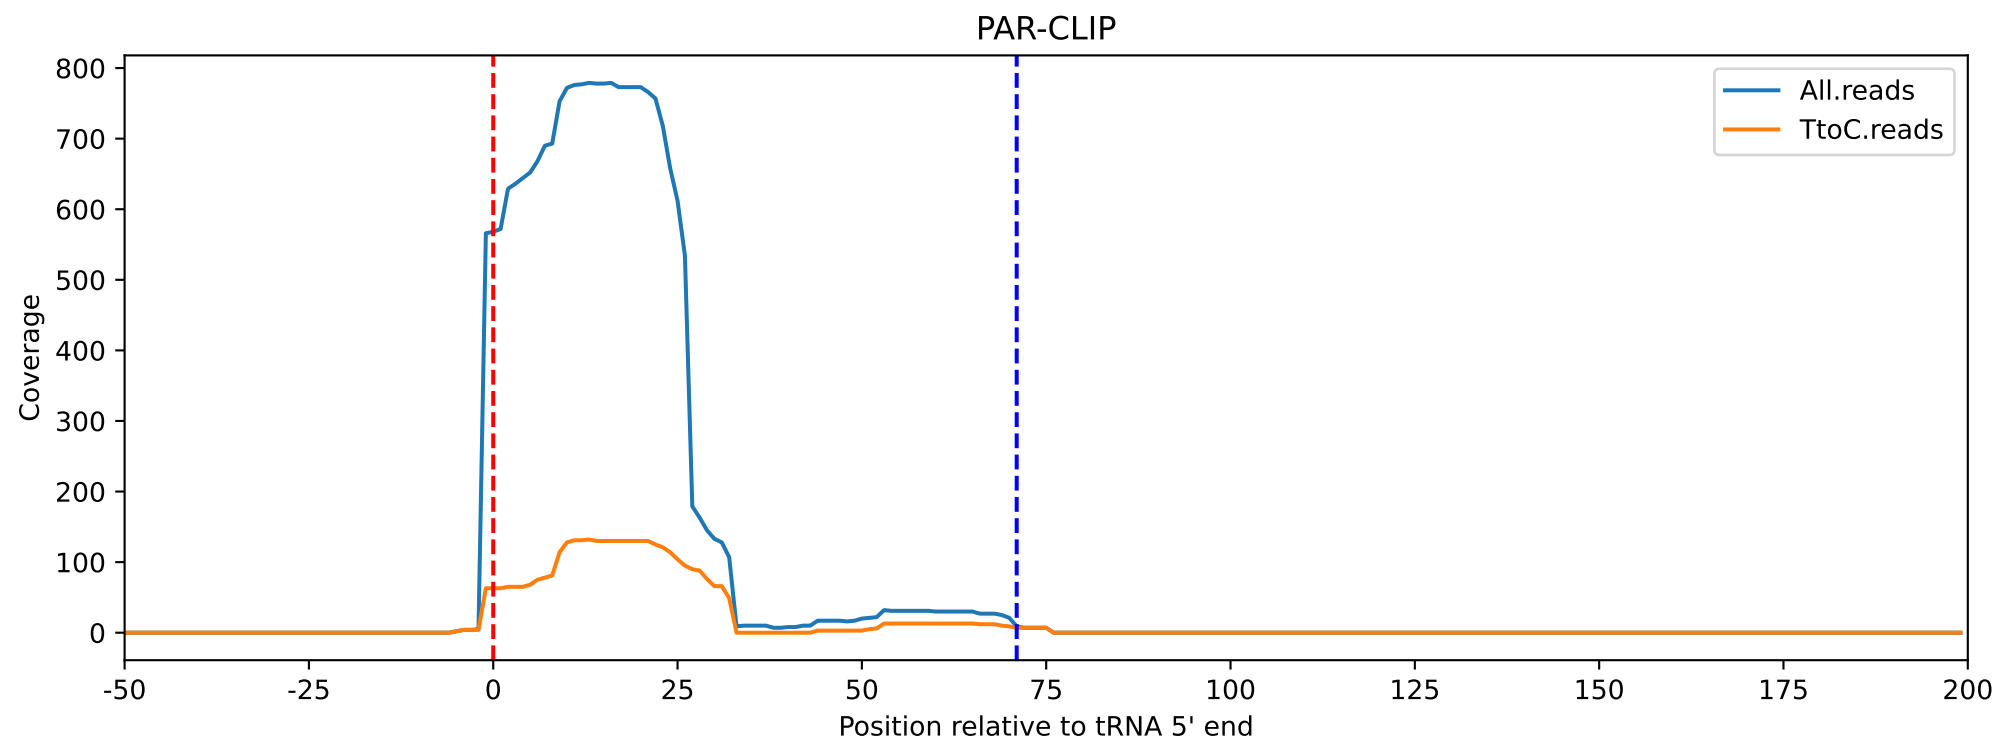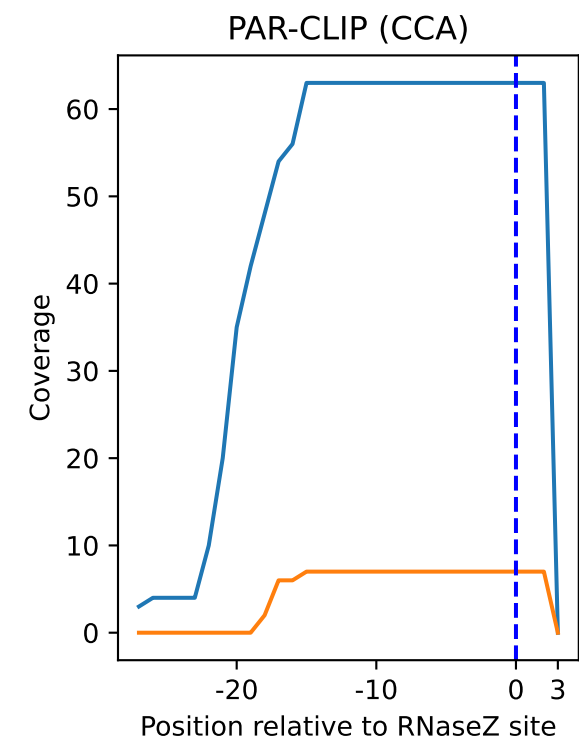

# tRNA-Pro-AGG-1-1

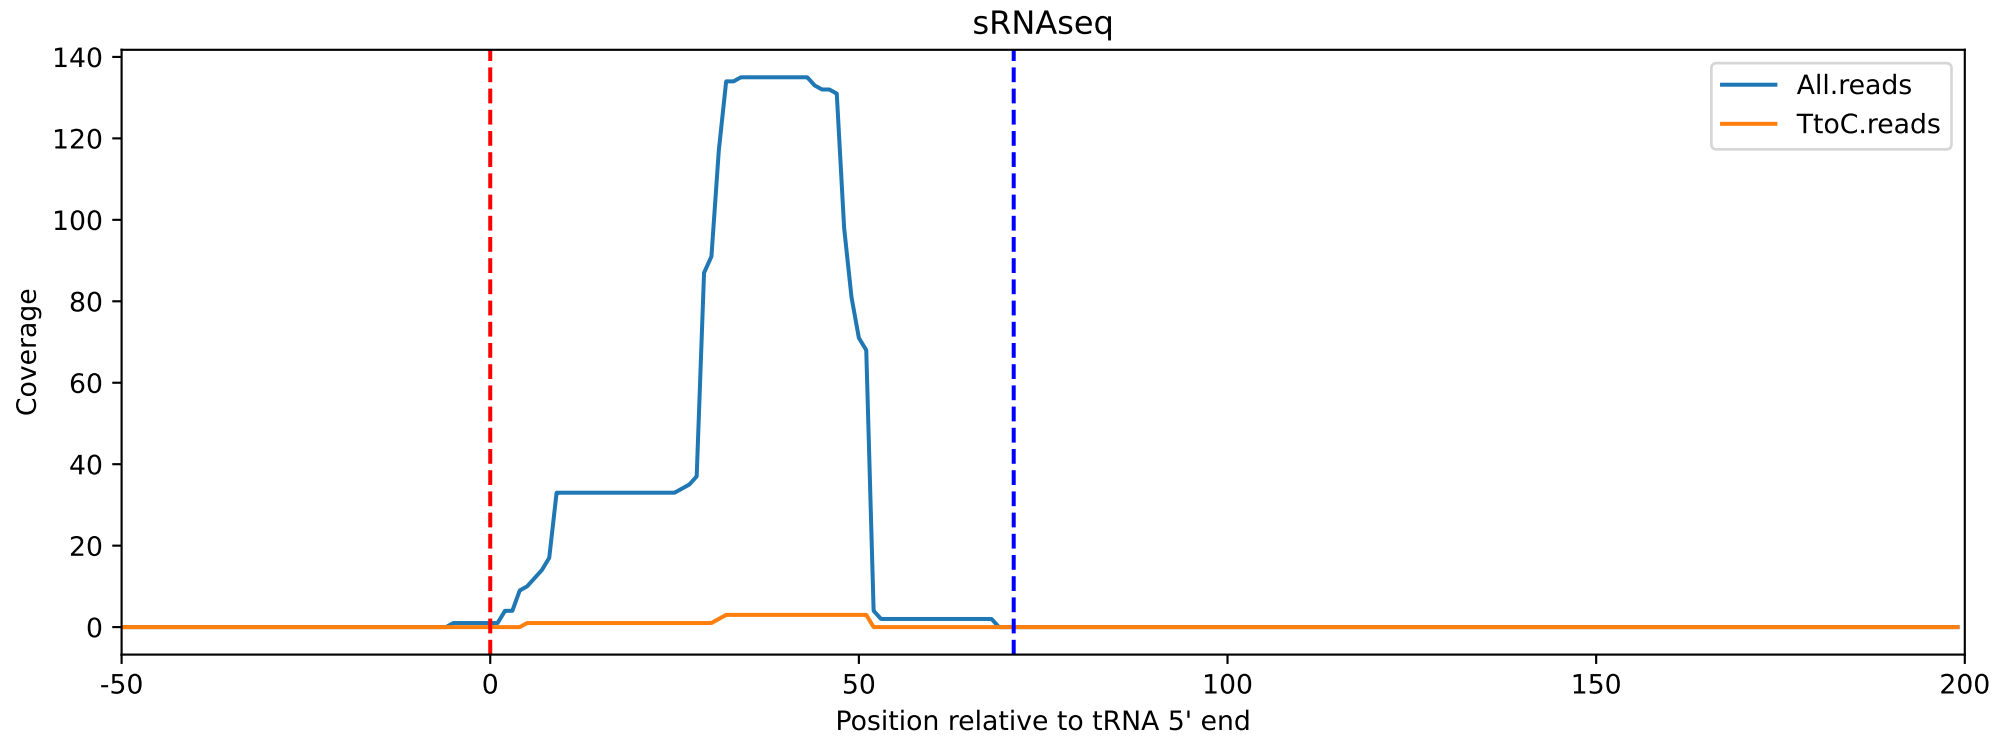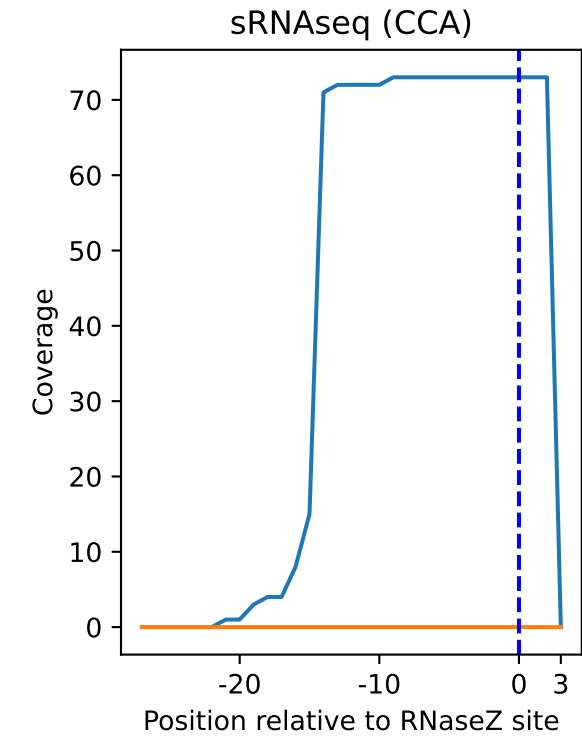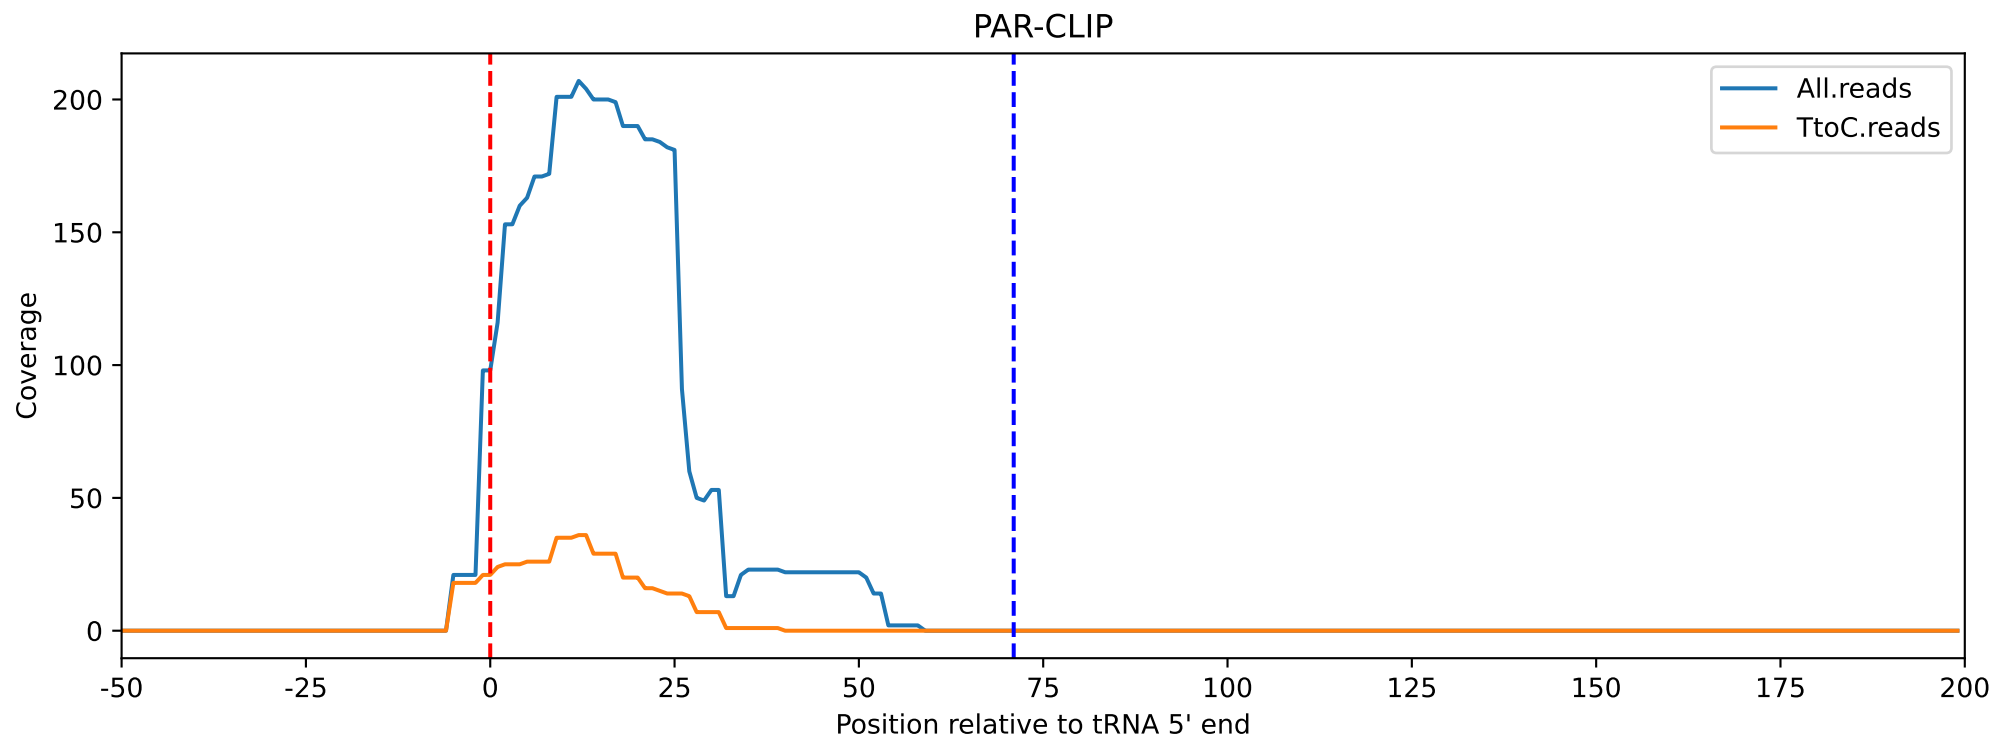

# tRNA-iMet-CAT-1-3

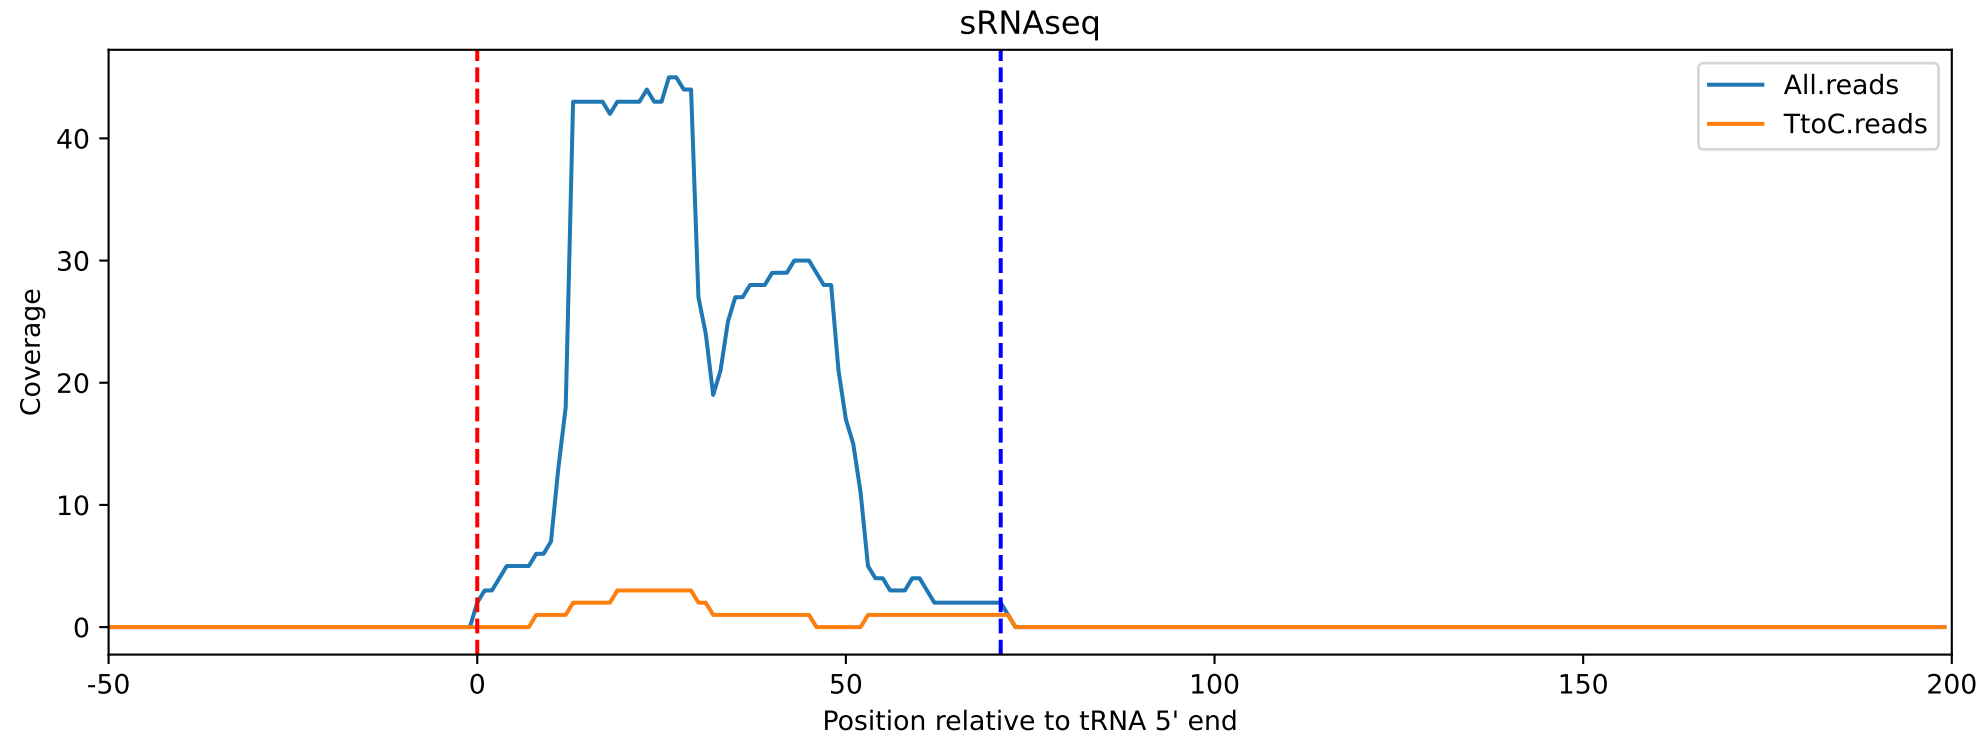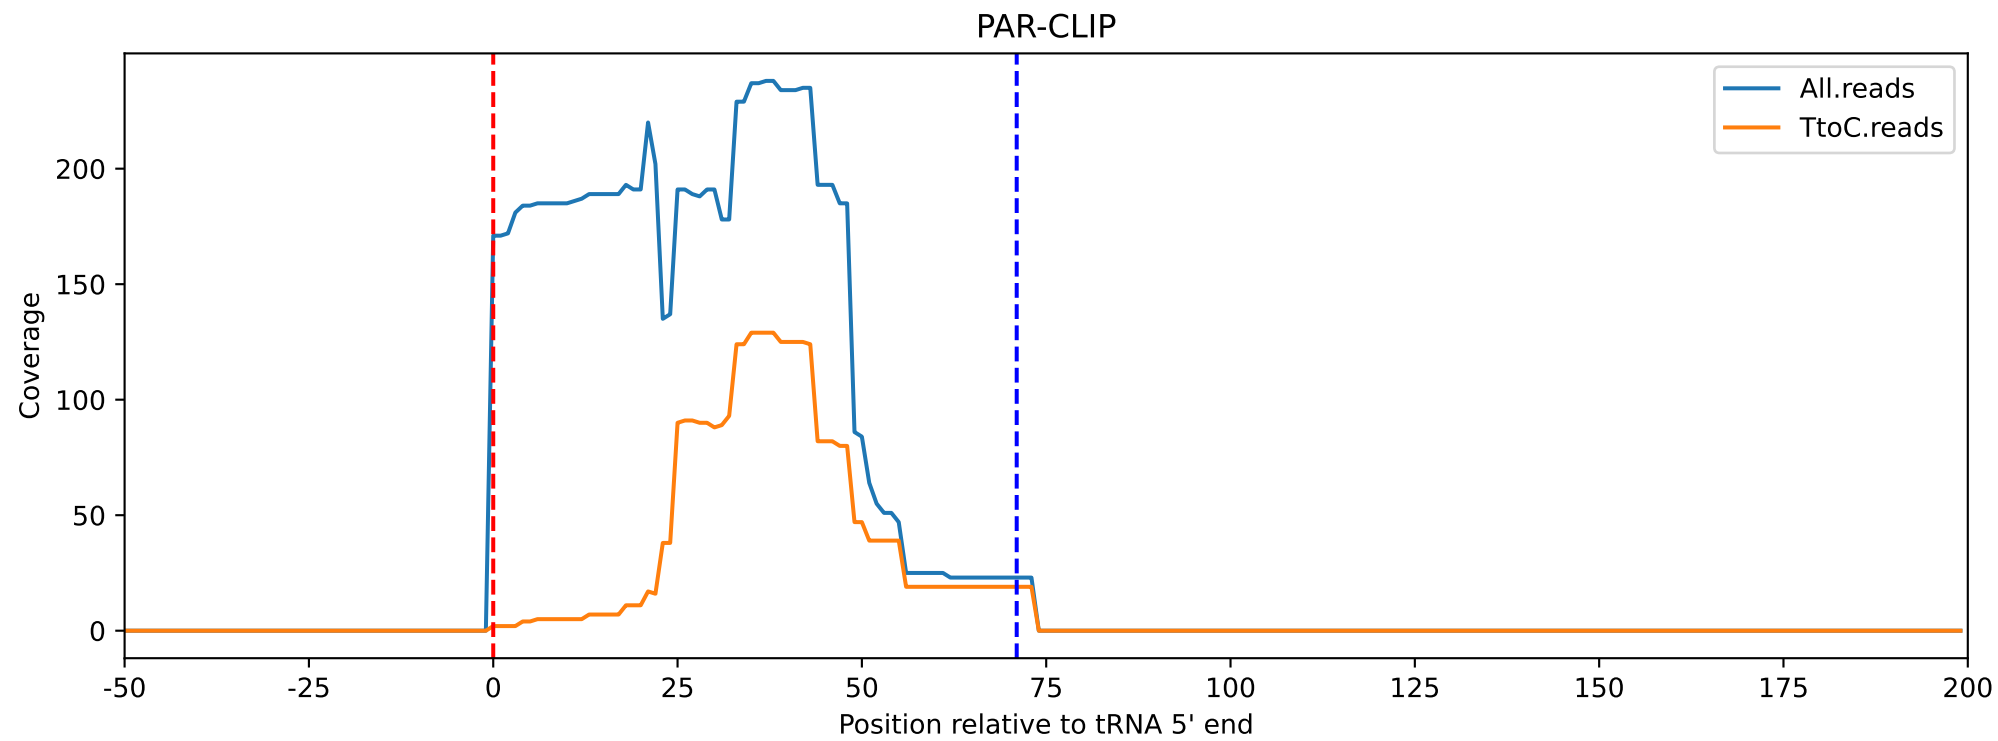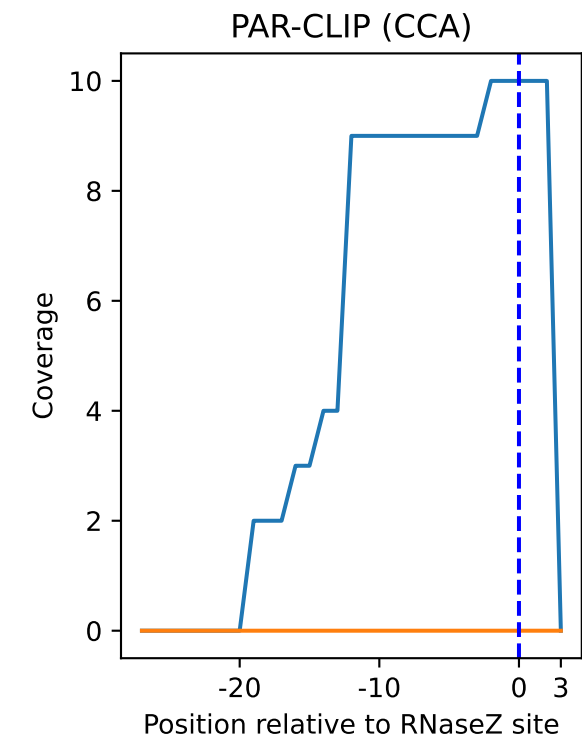

# tRNA-Glu-TTC-1-3

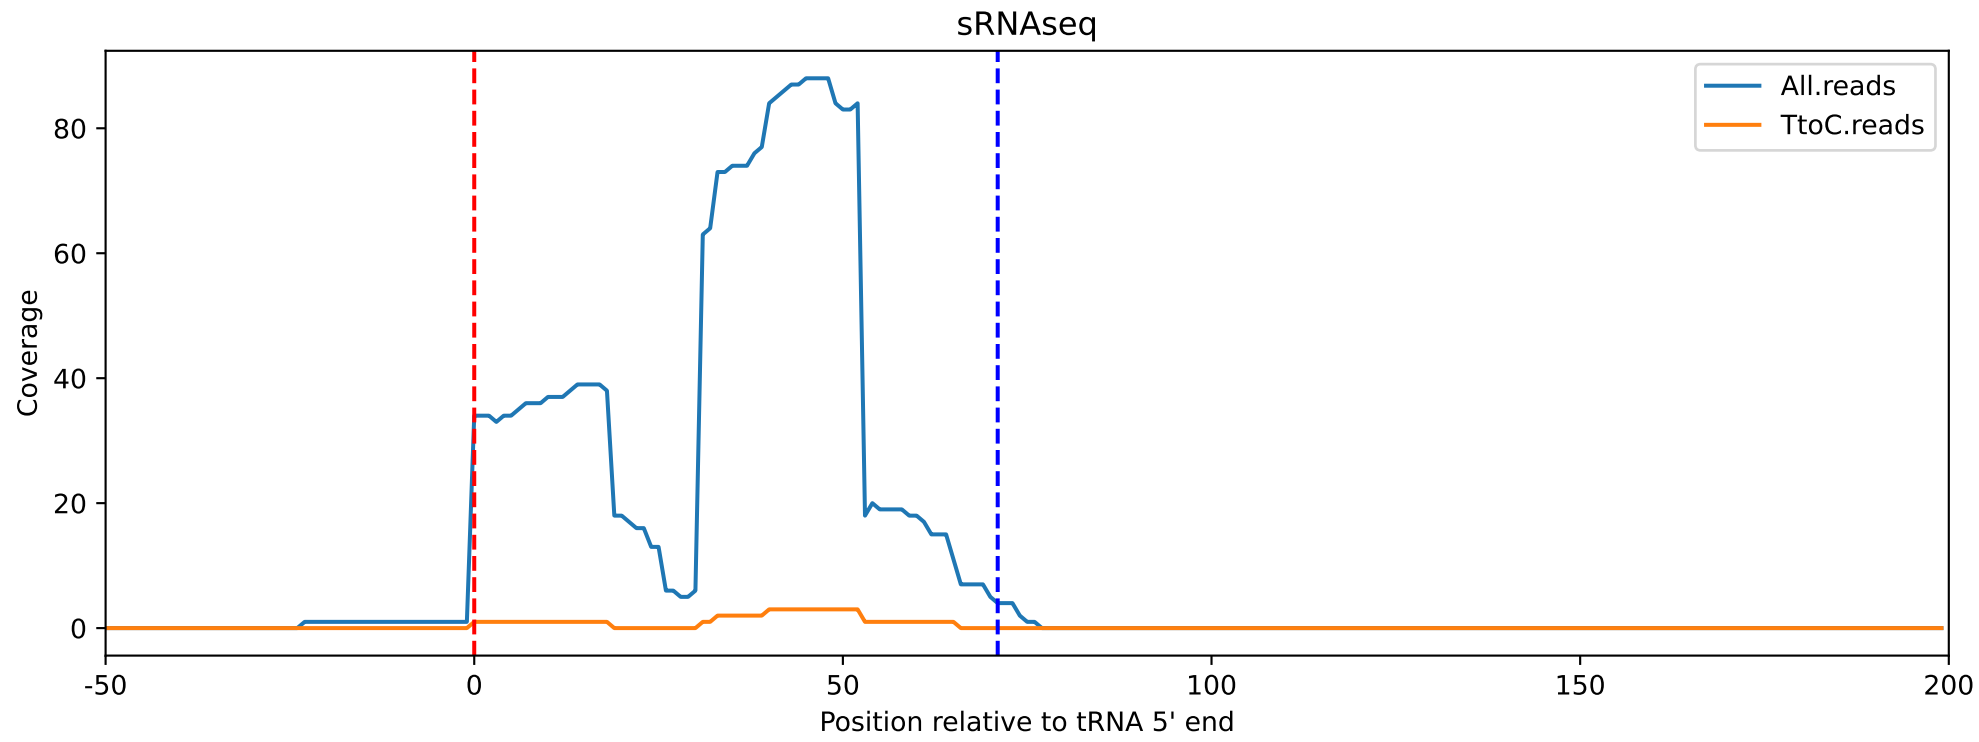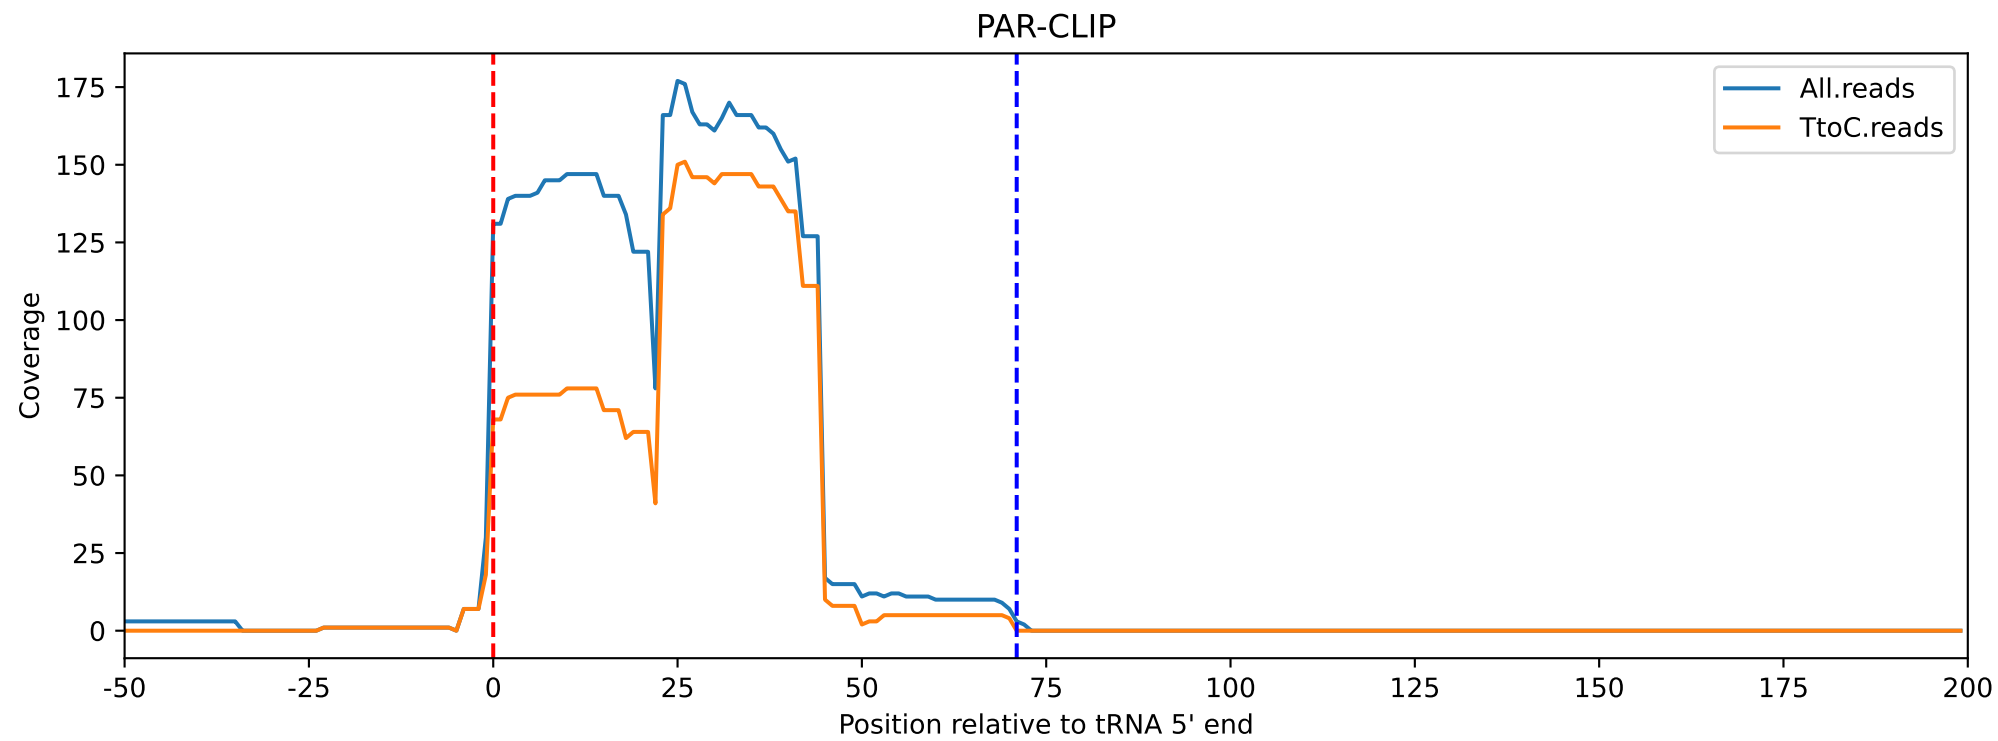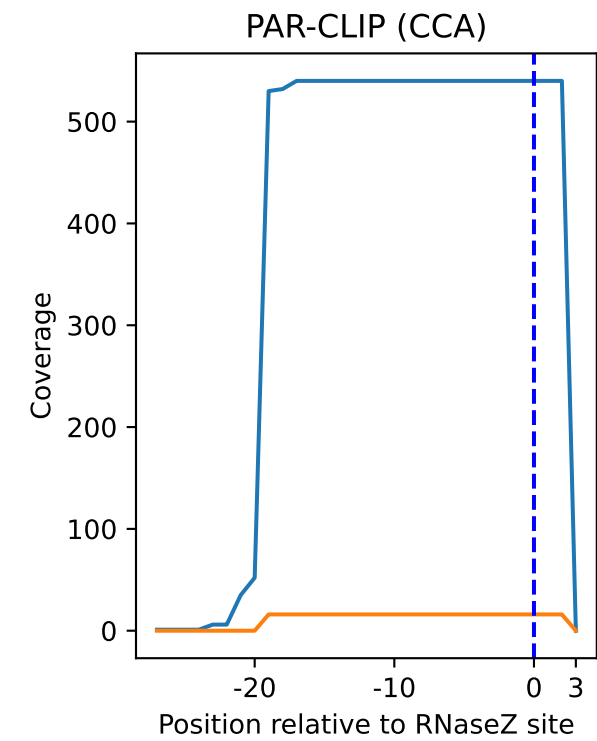

# tRNA-Val-CAC-2-2

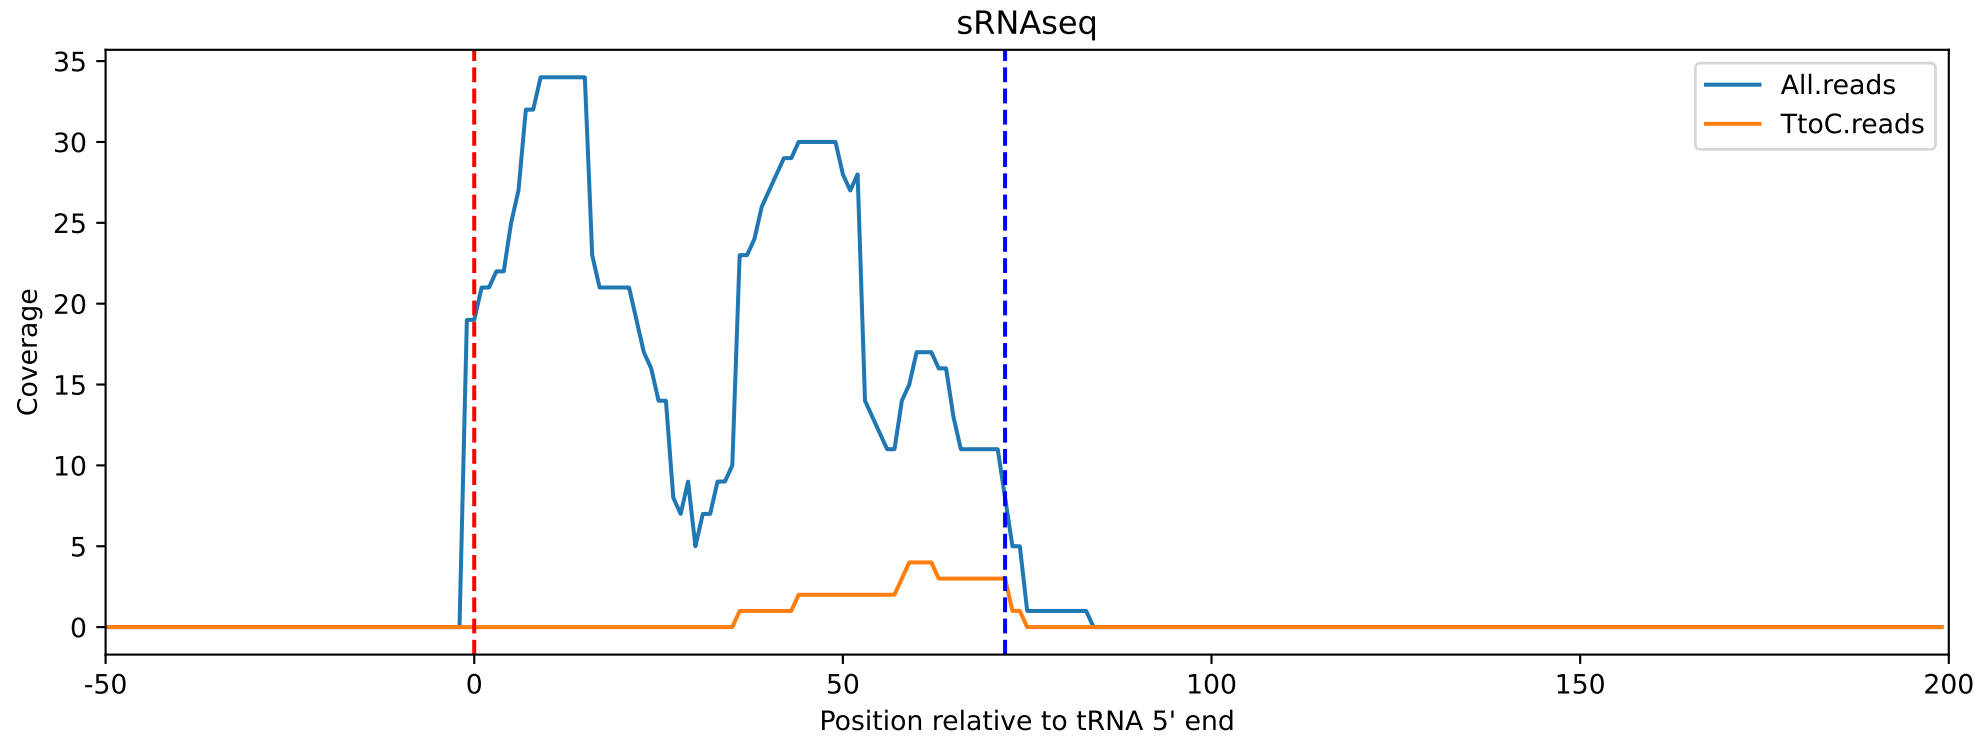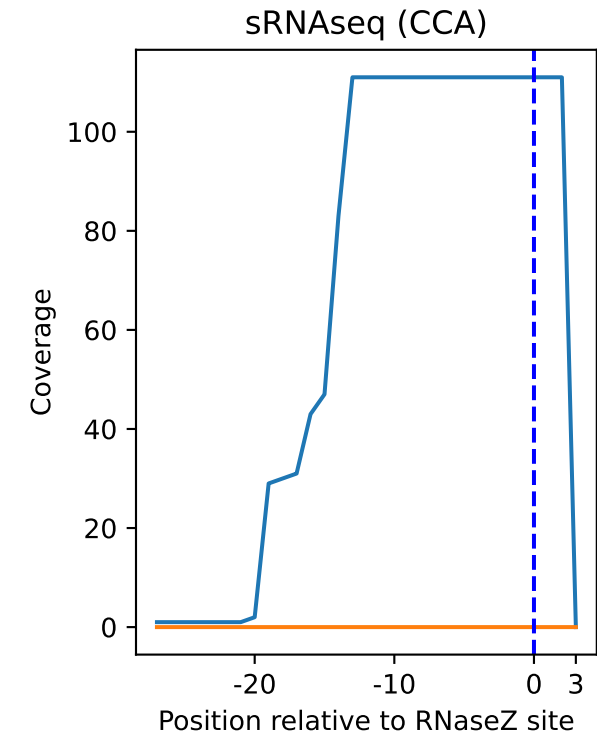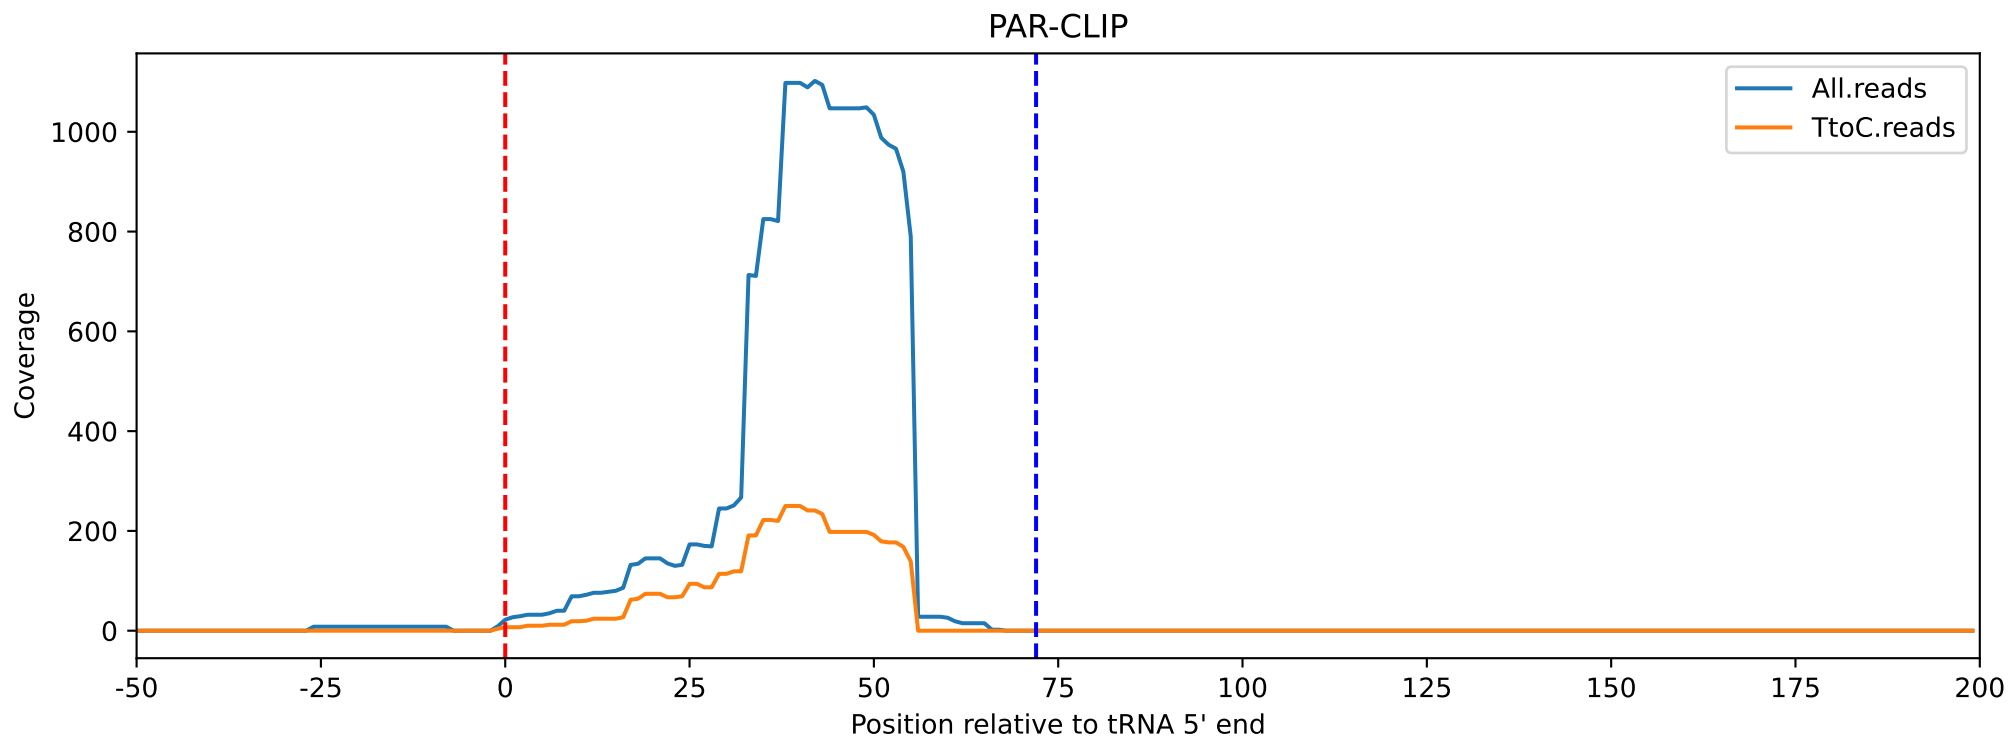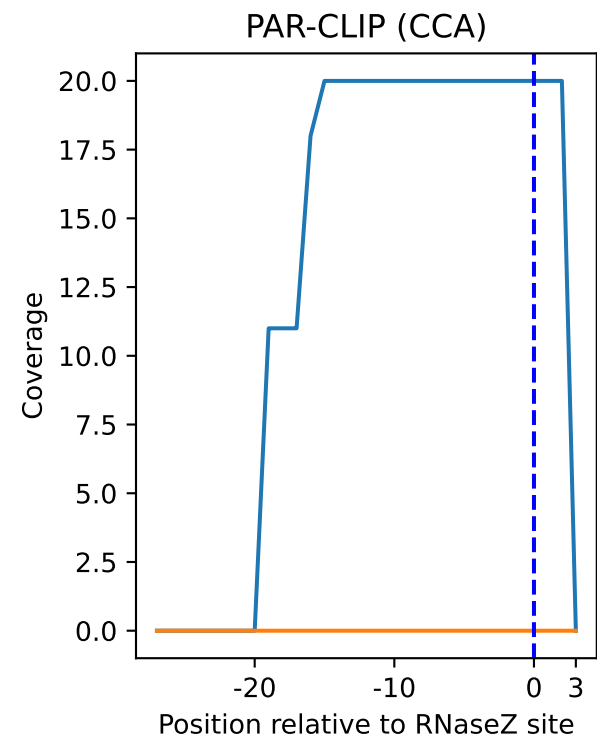



# tRNA-Leu-AAG-1-2

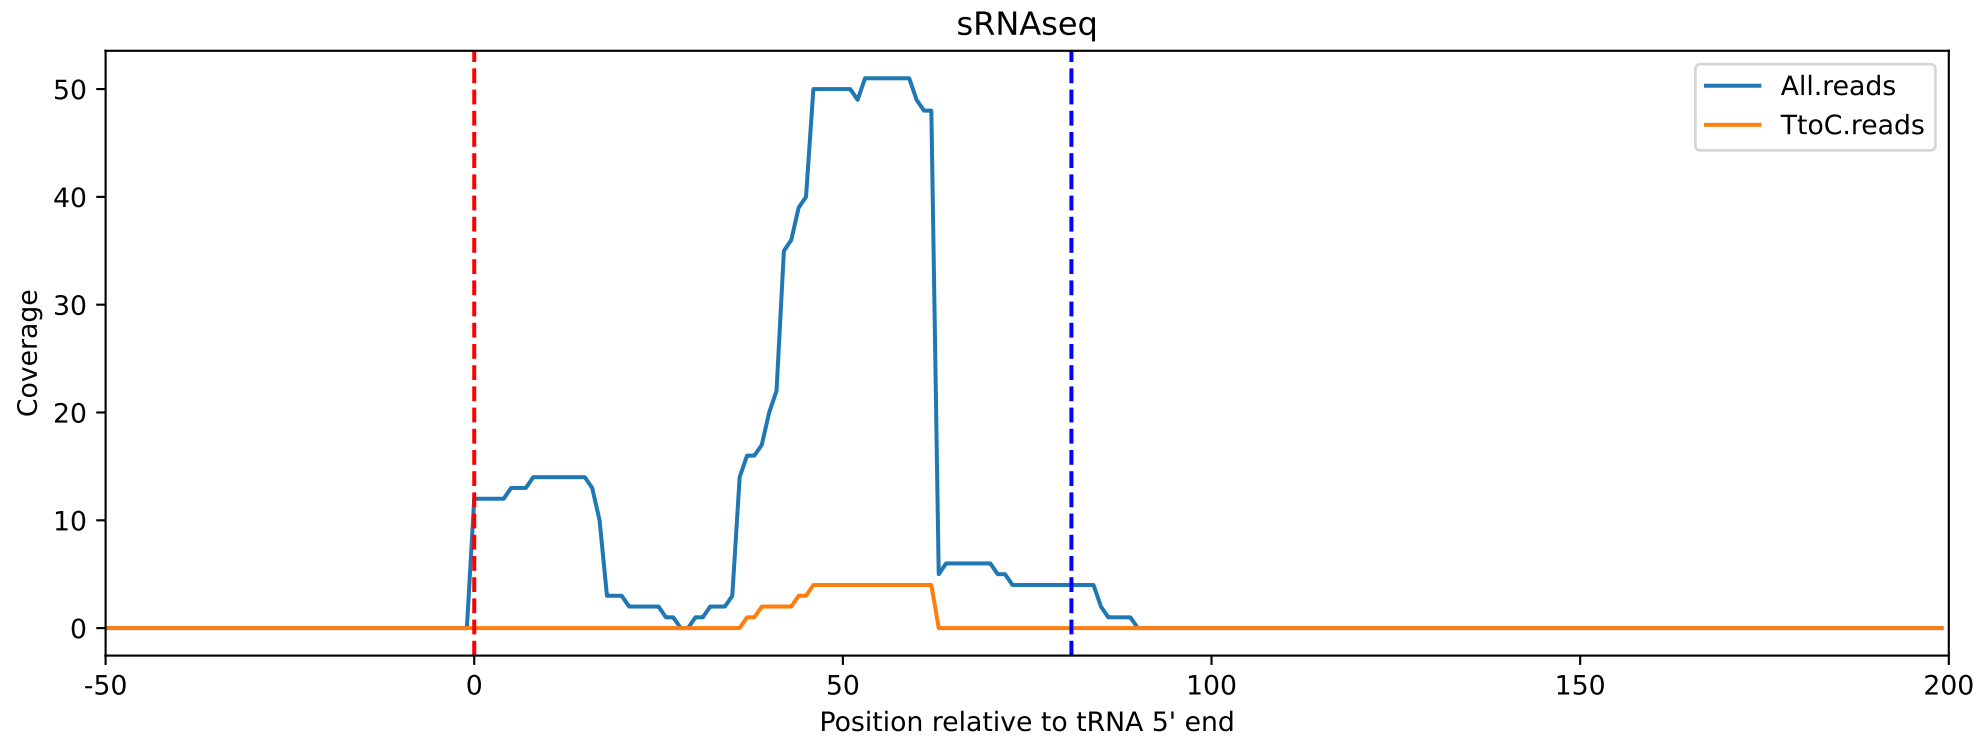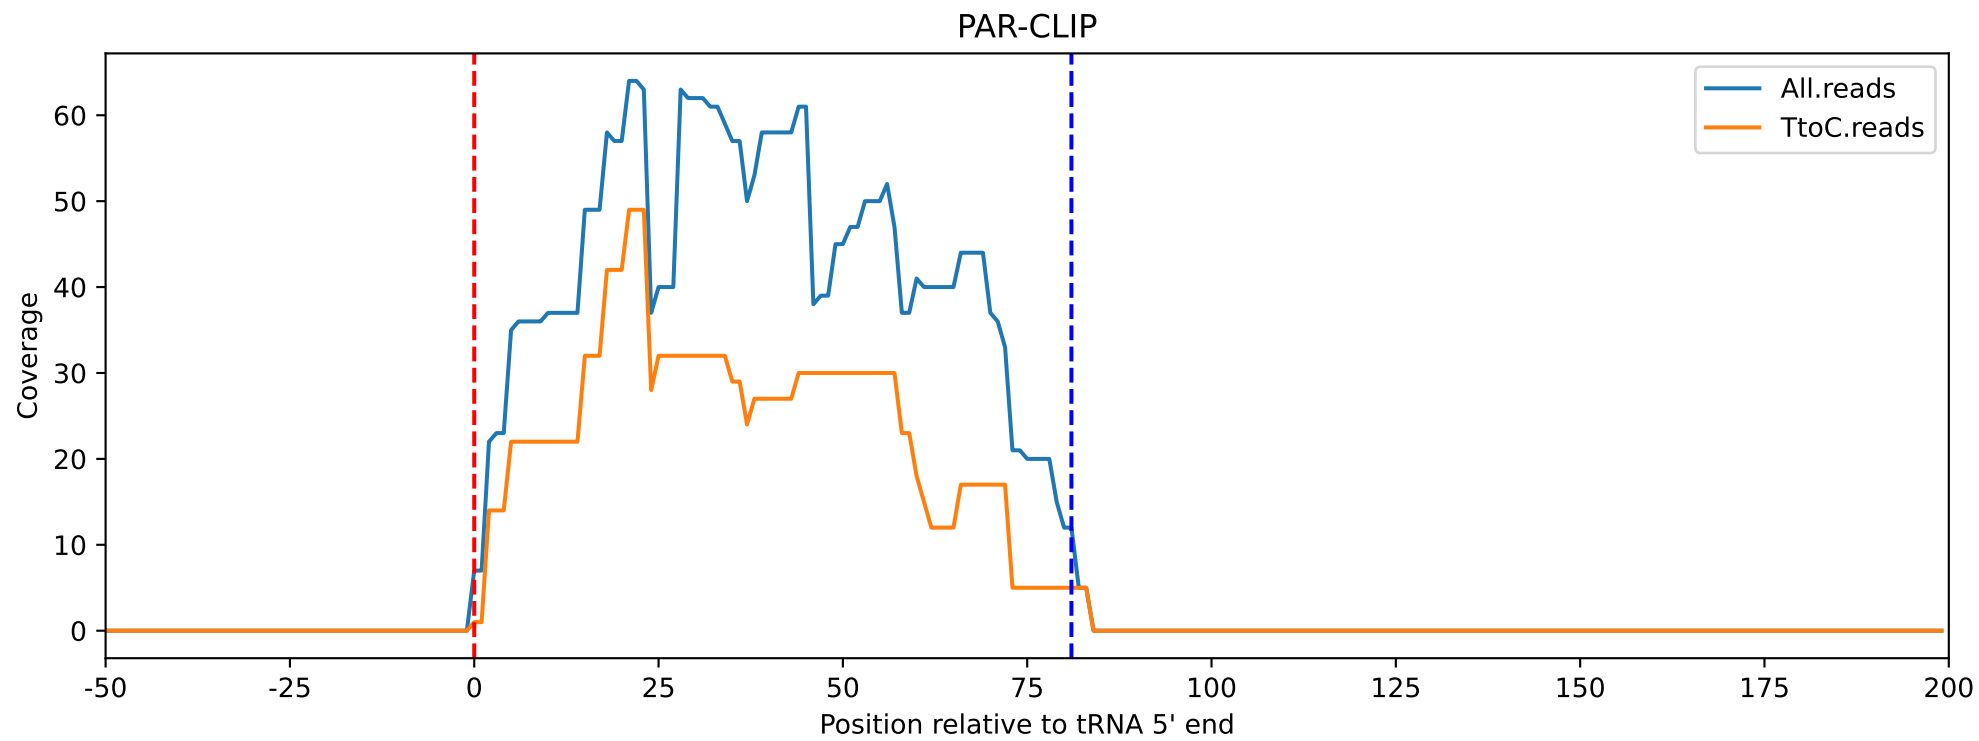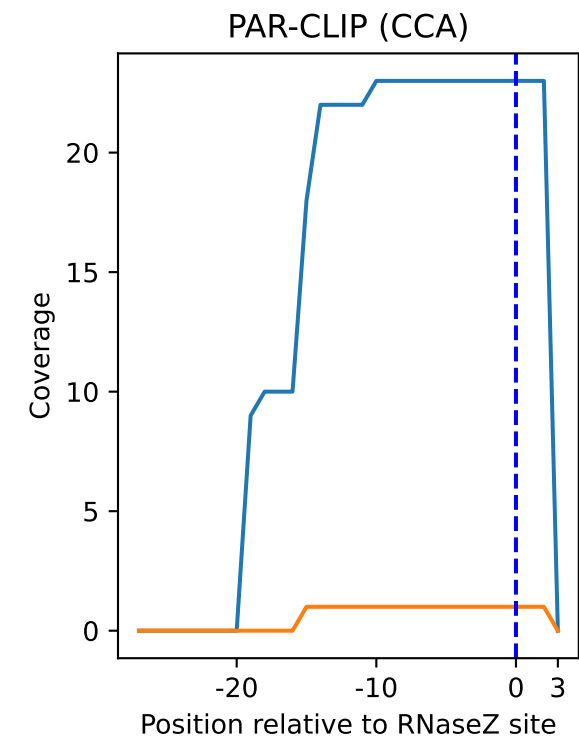

# tRNA-Leu-AAG-1-3

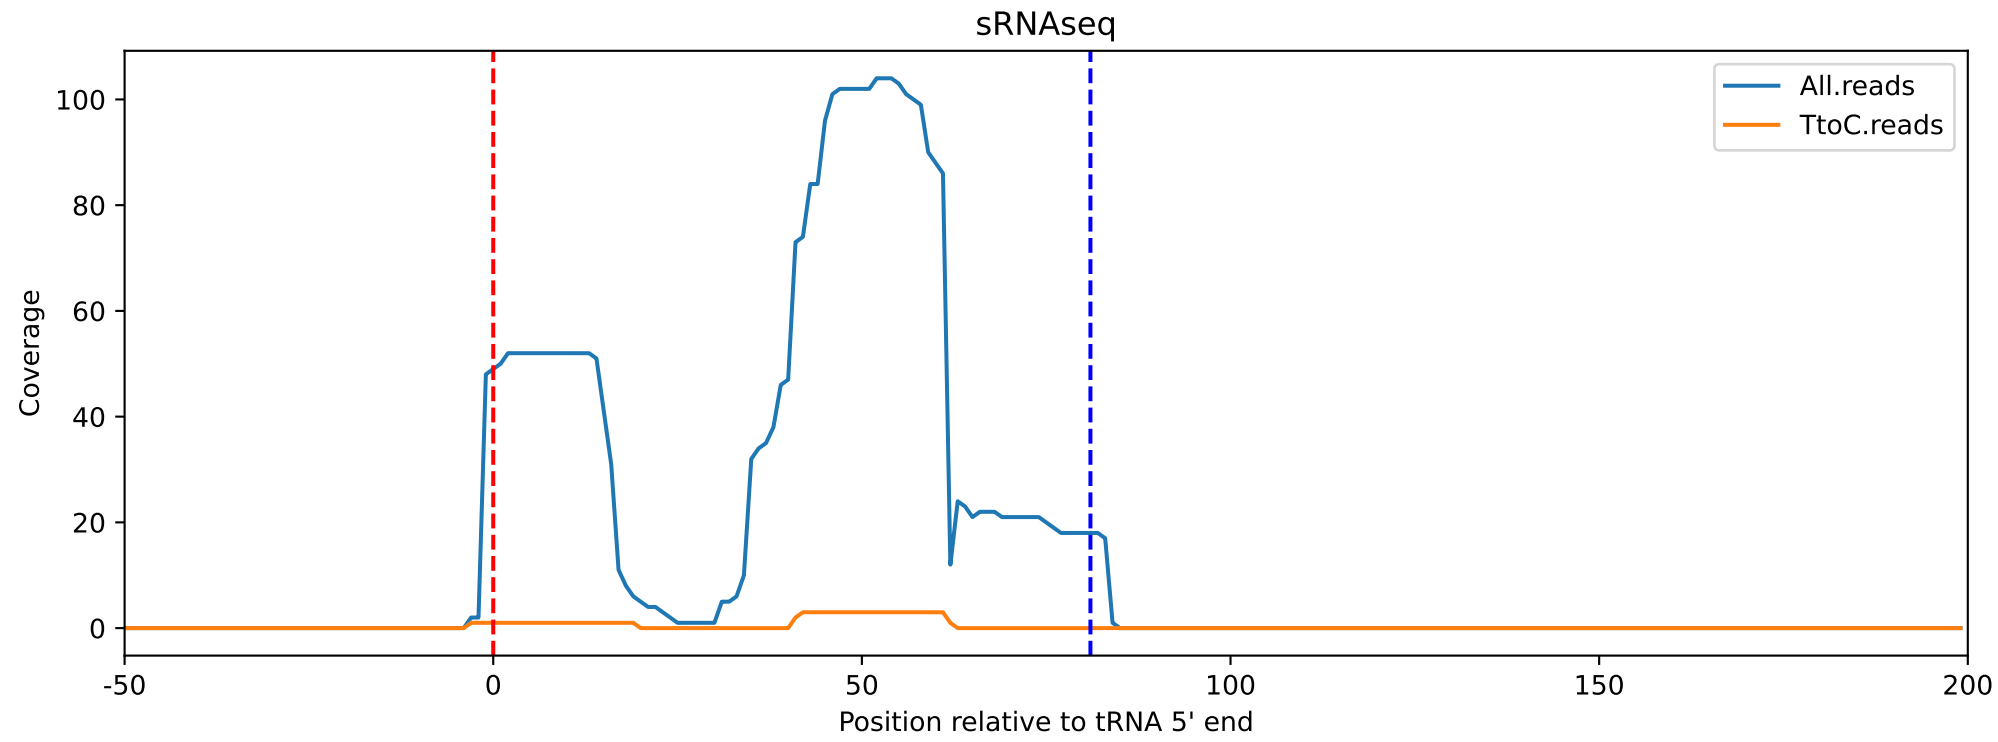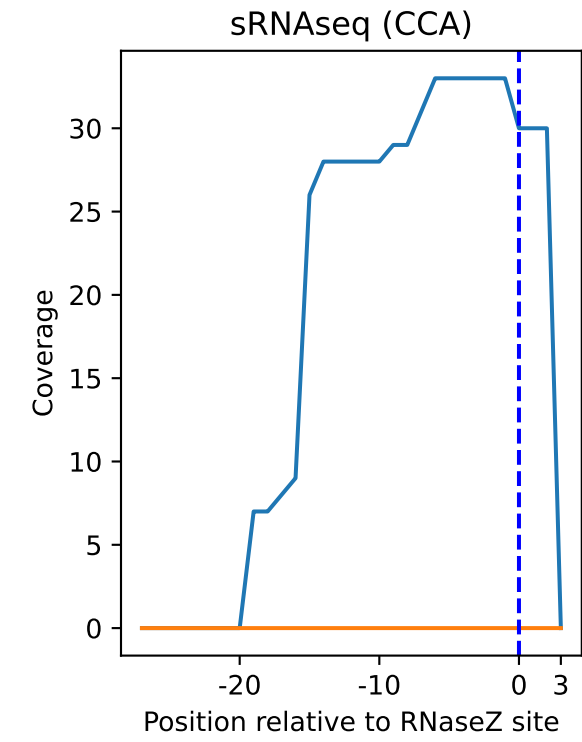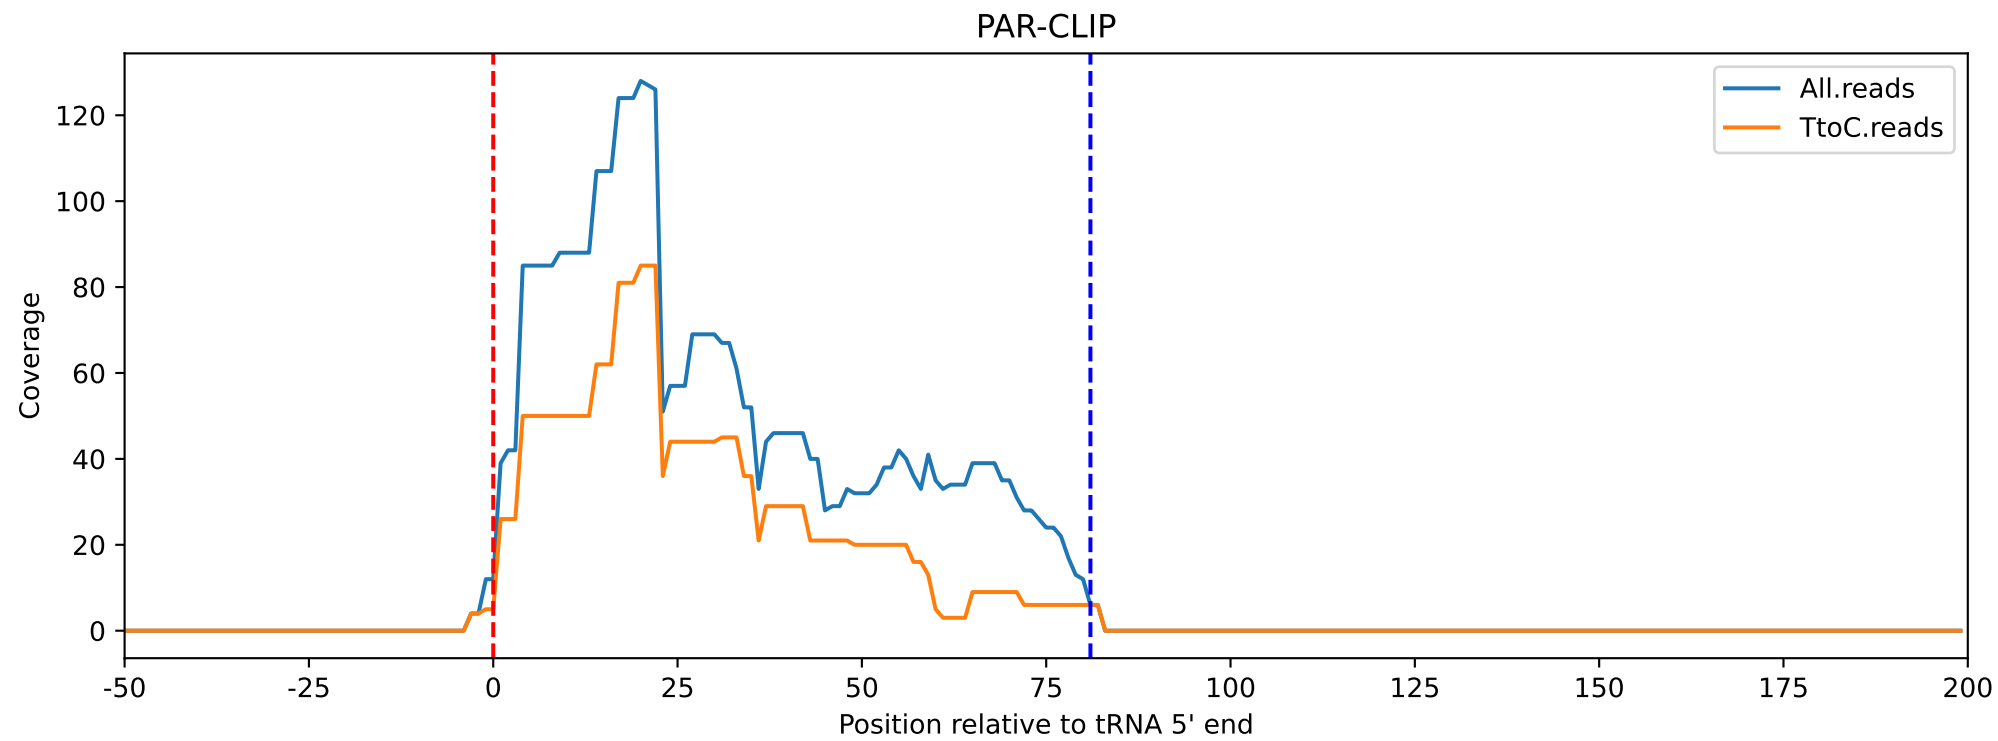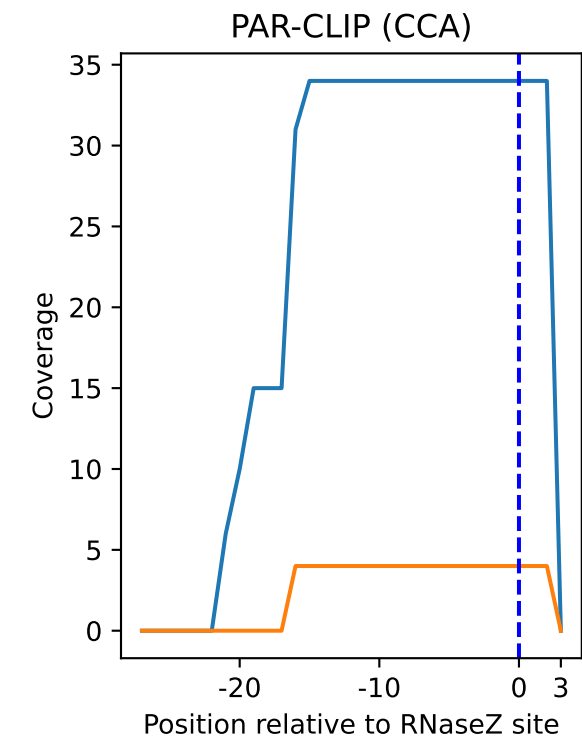

# tRNA-Glu-CTC-3-7

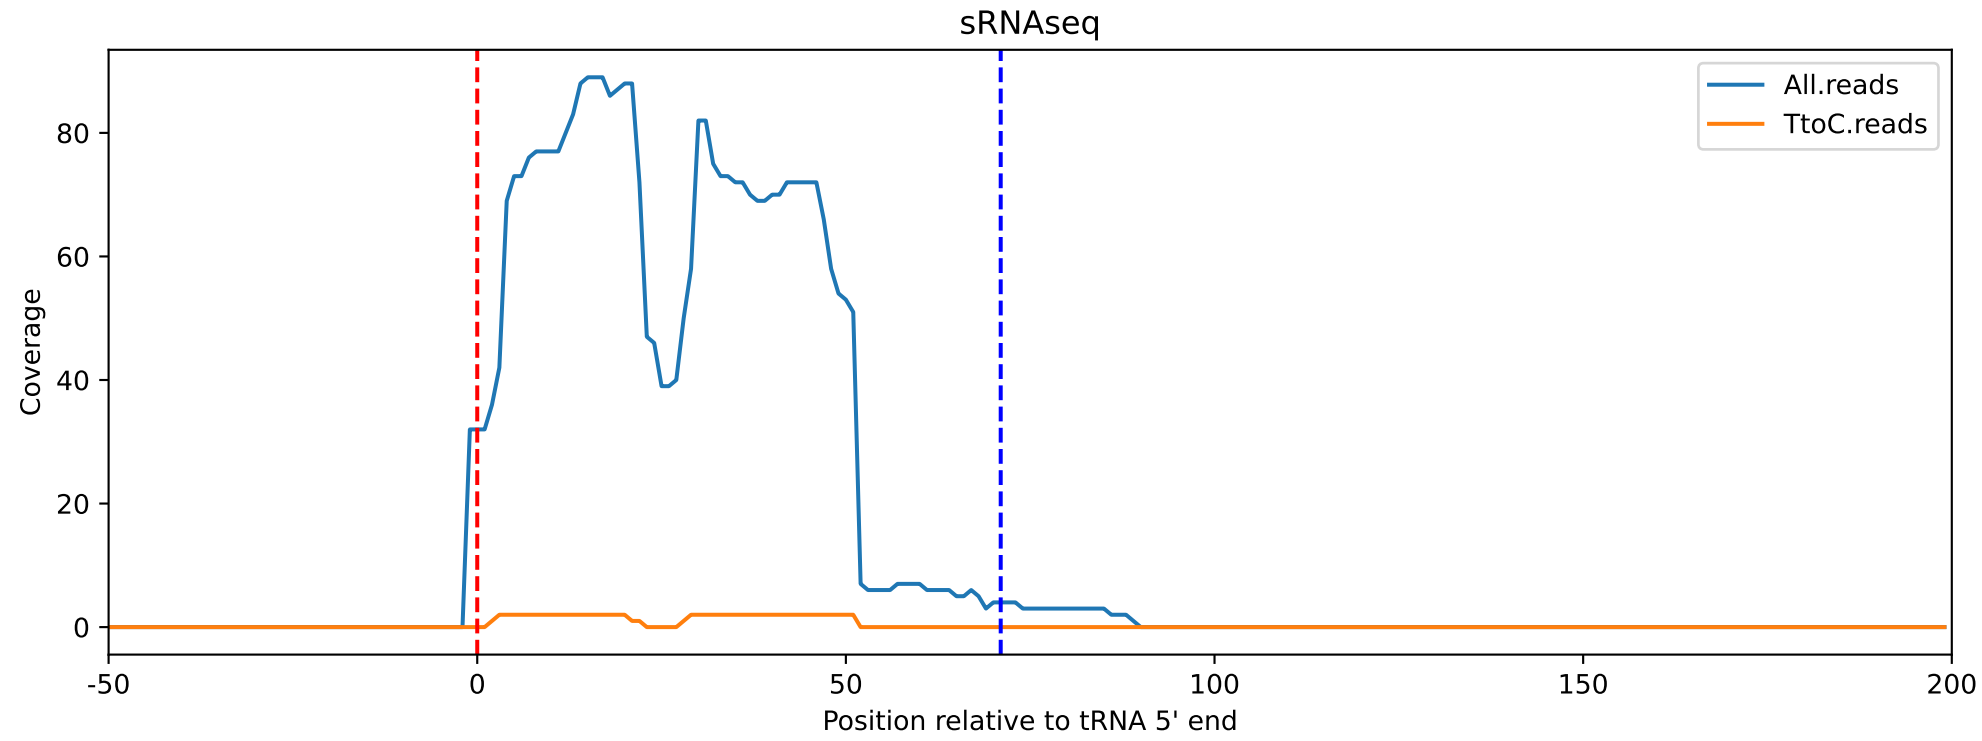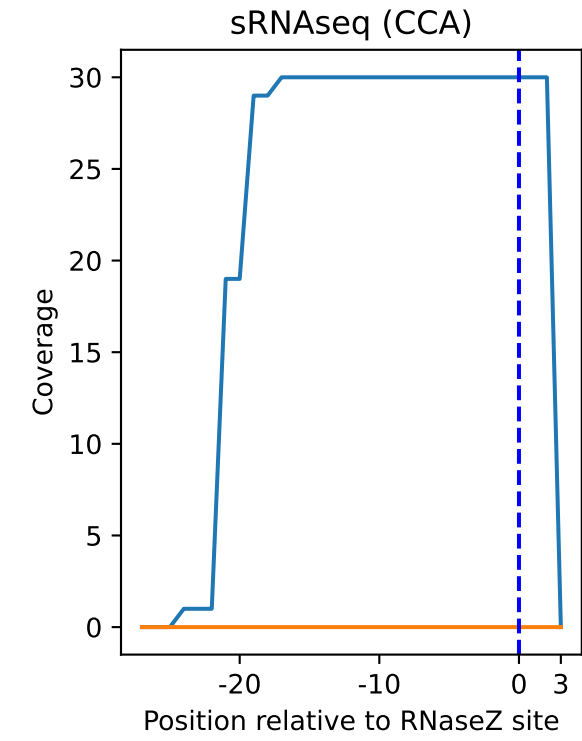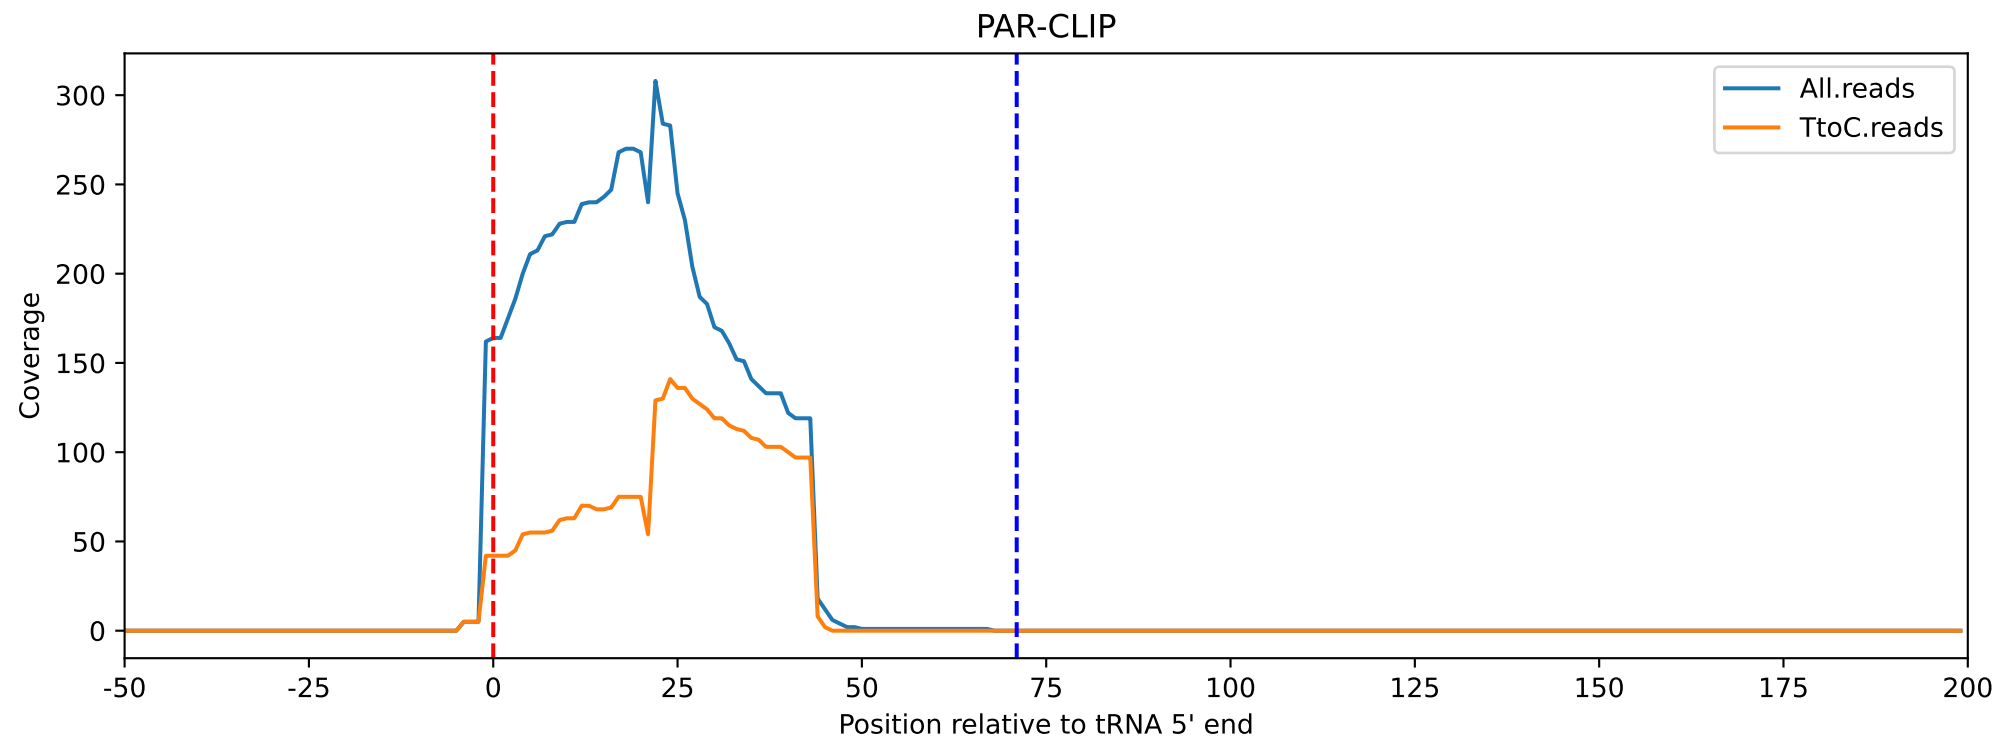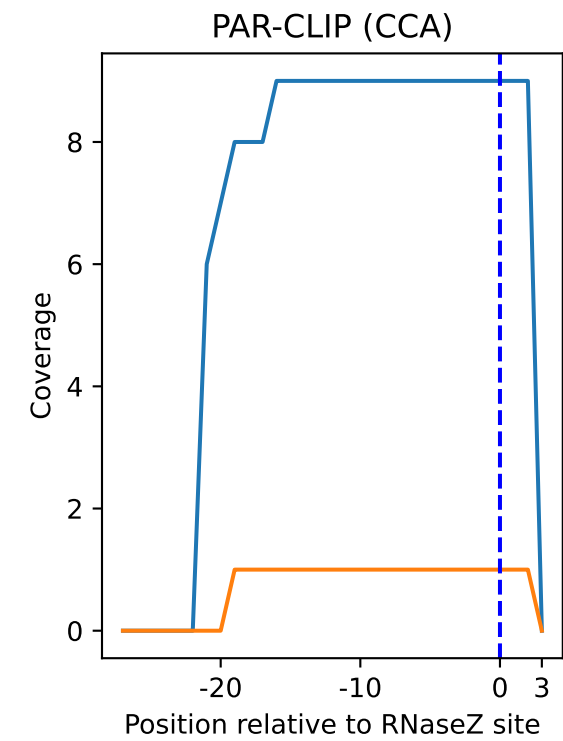

# tRNA-Asp-GTC-1-12

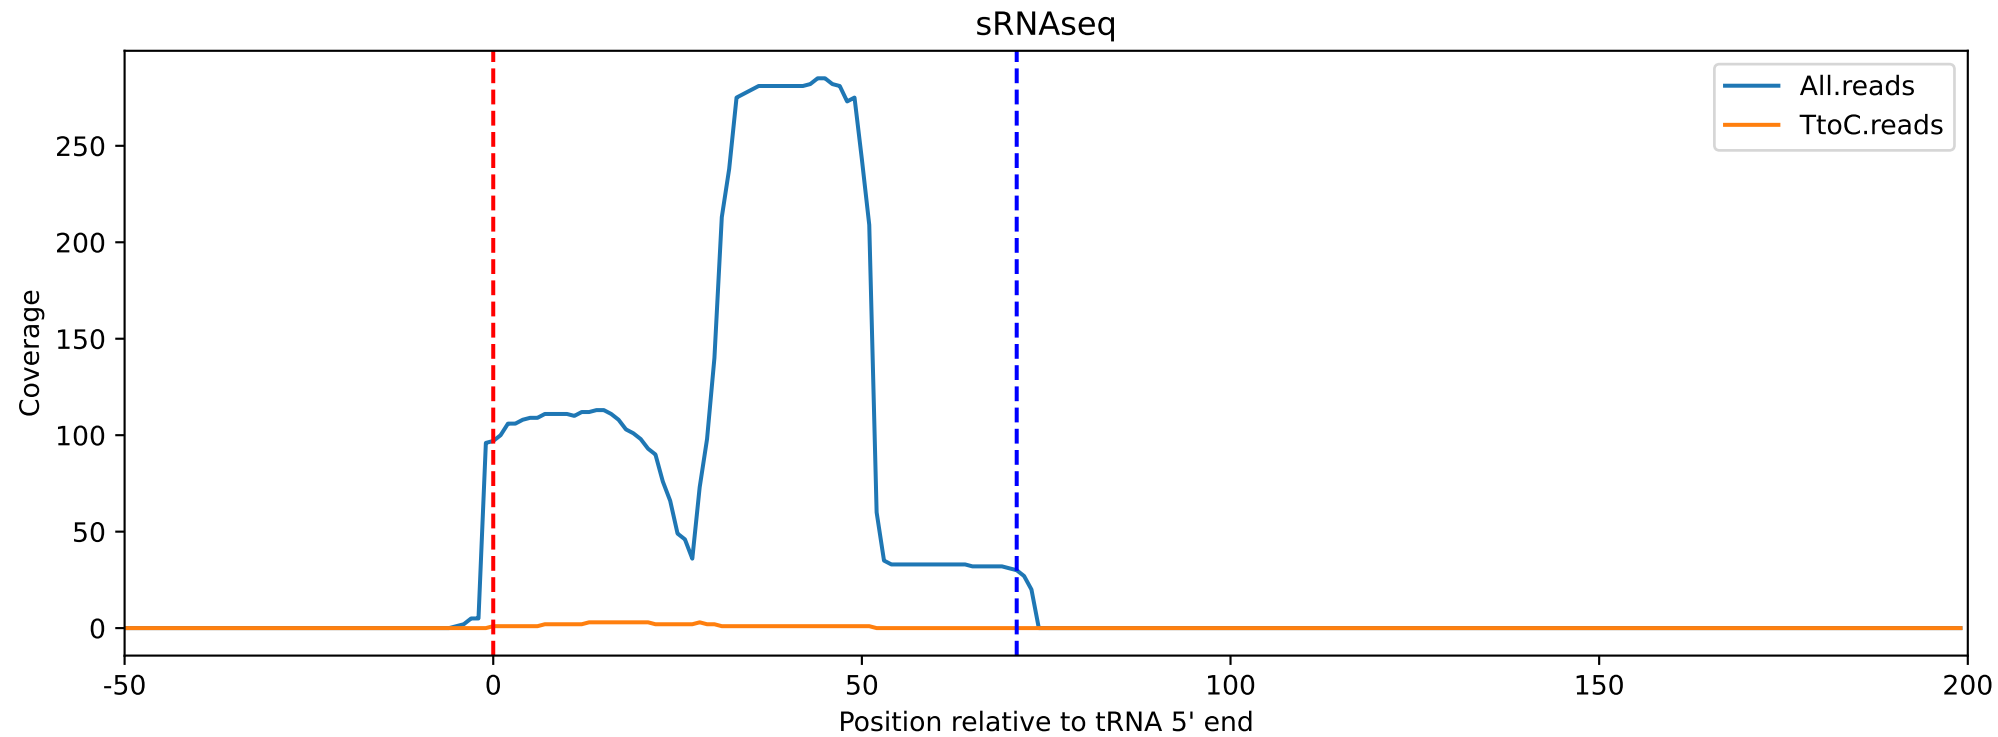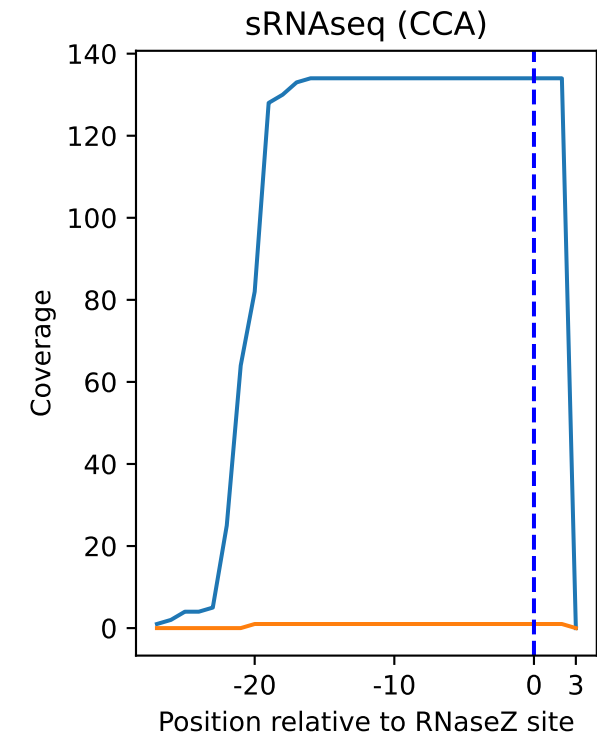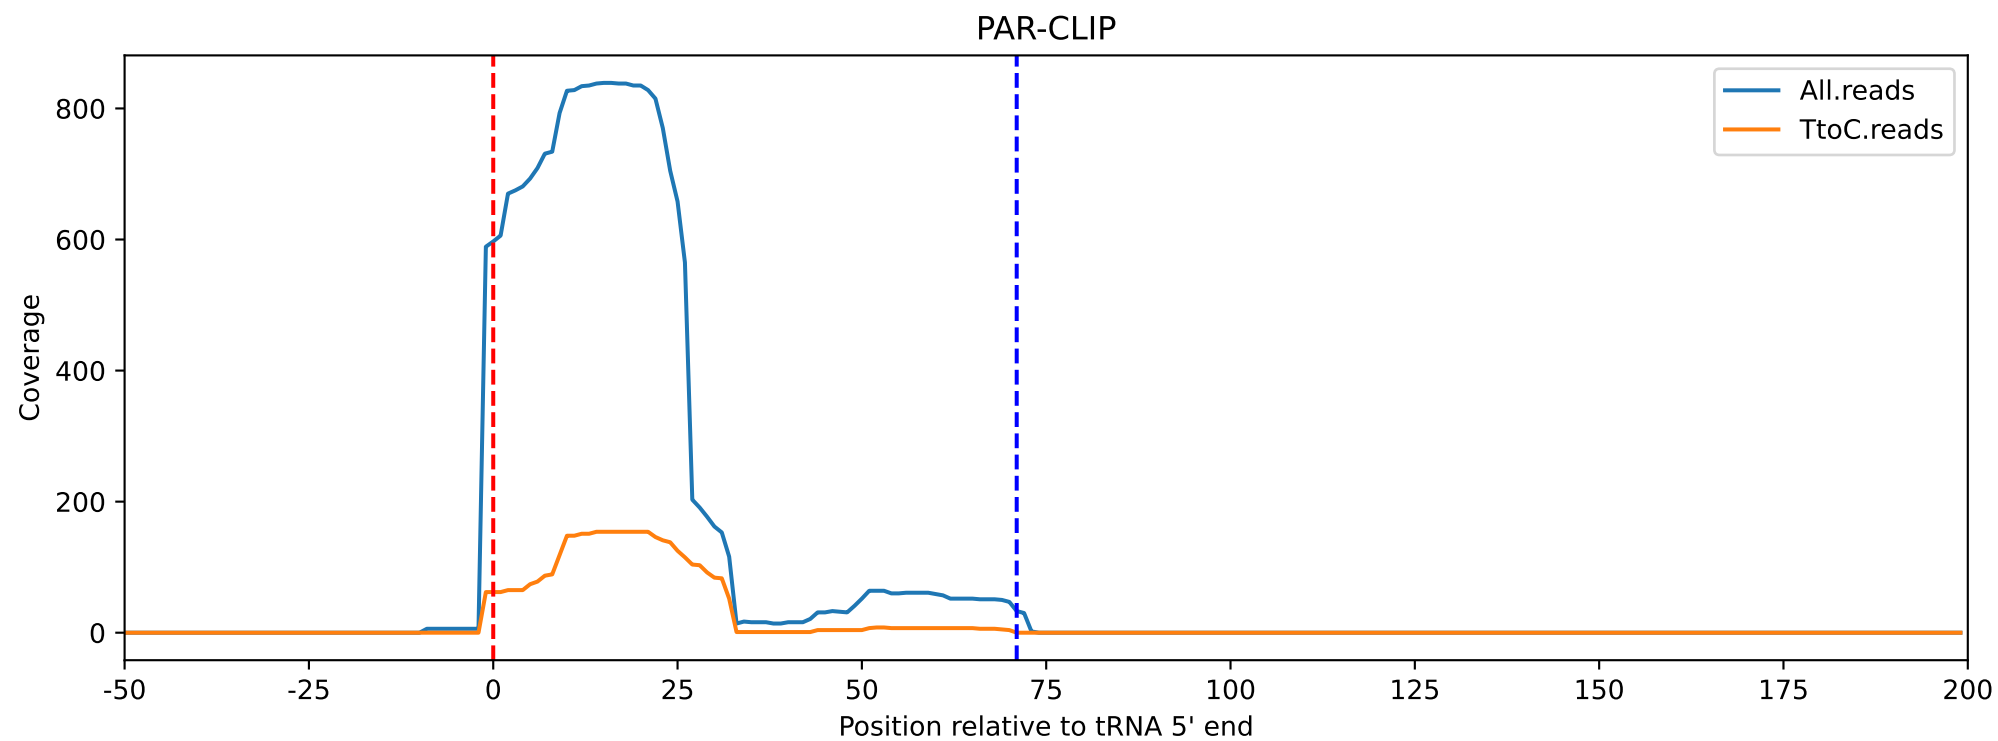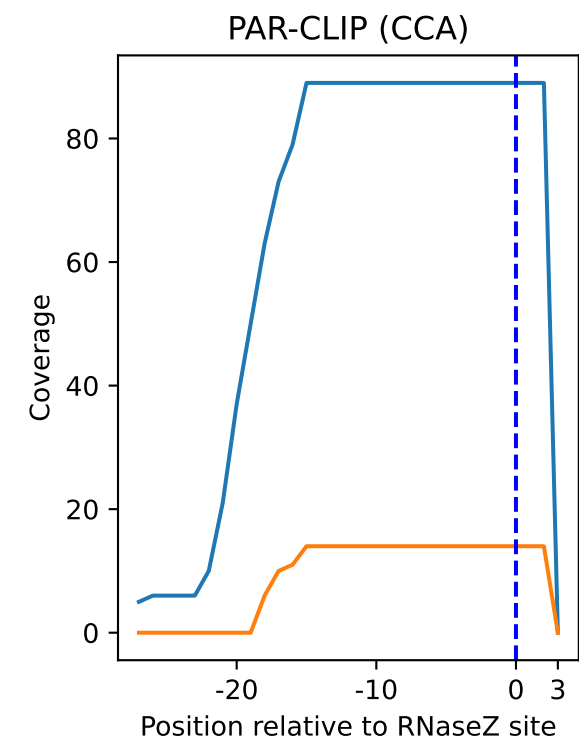

# tRNA-Thr-AGT-1-1

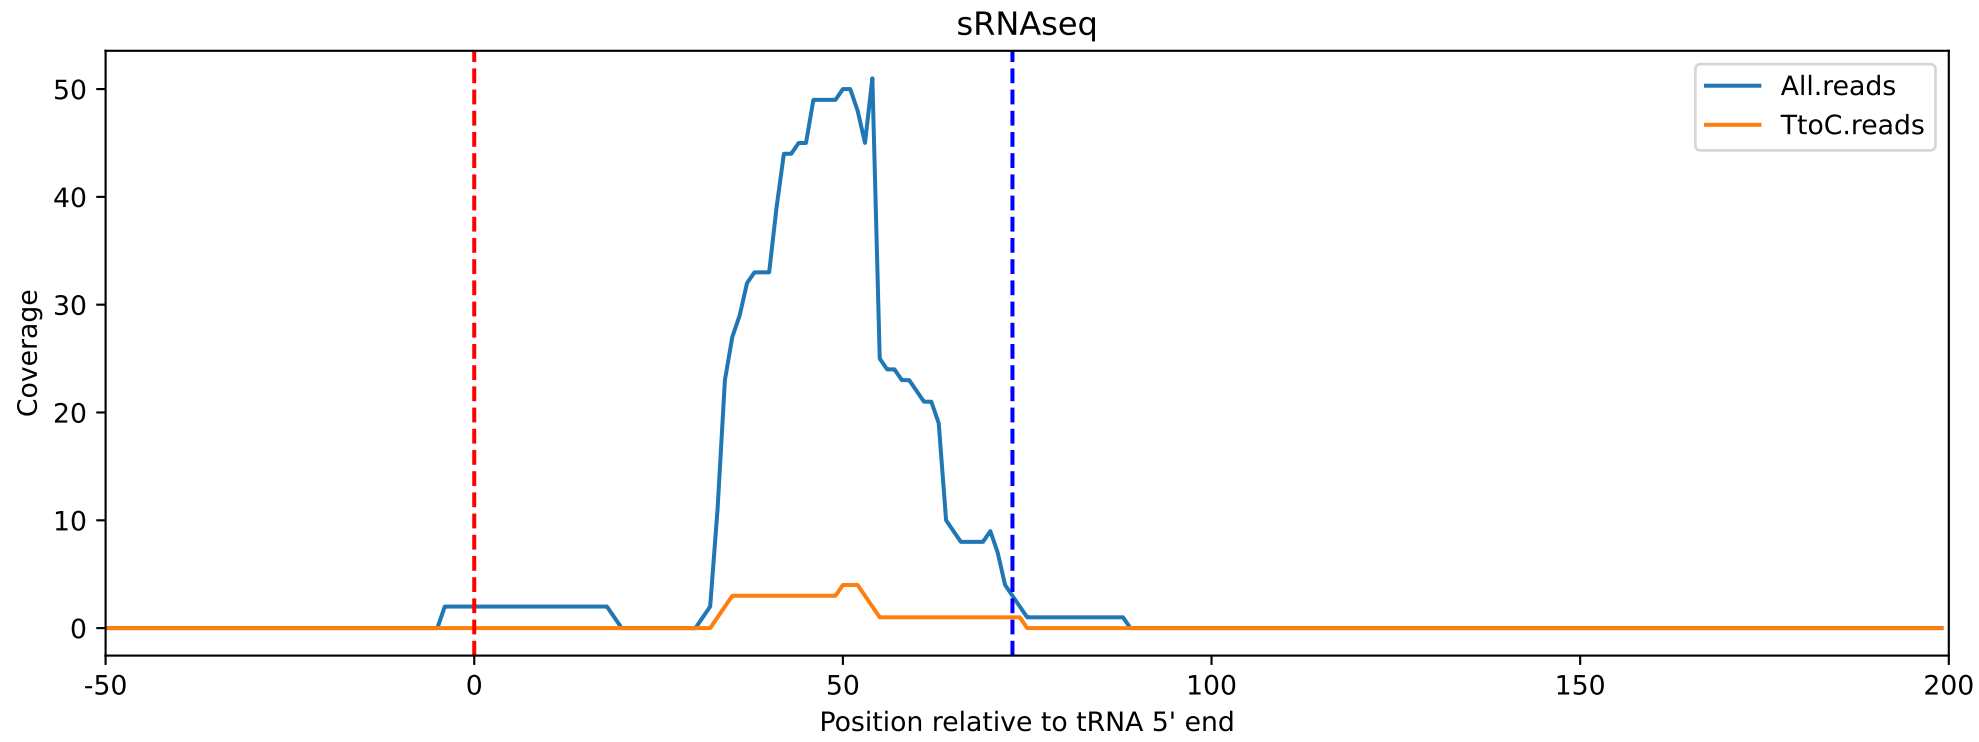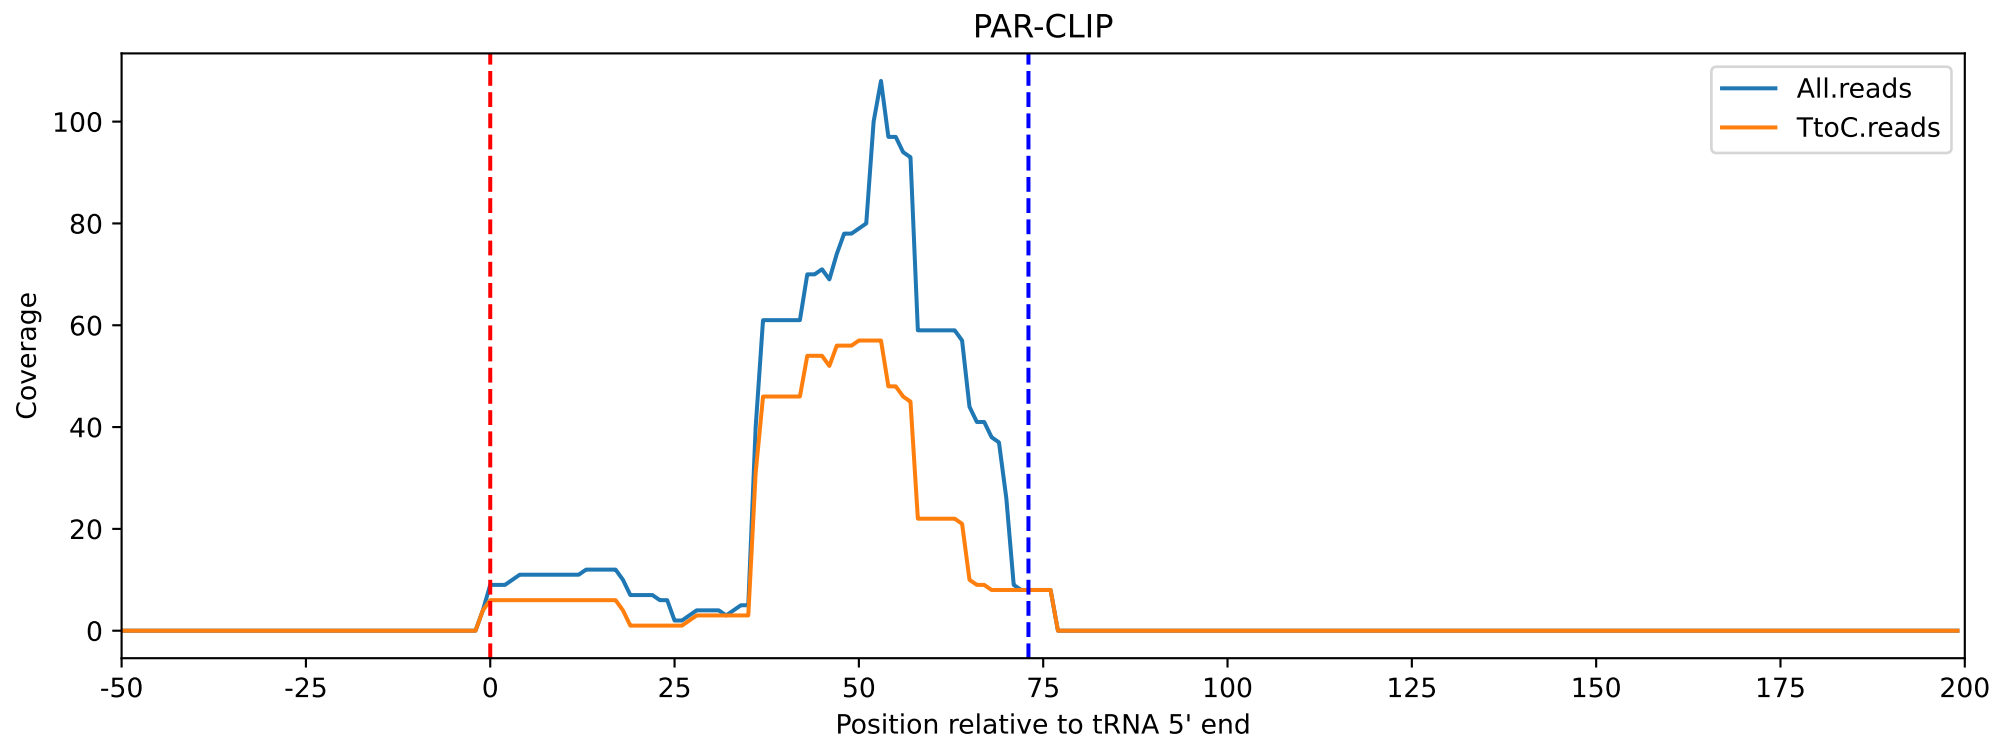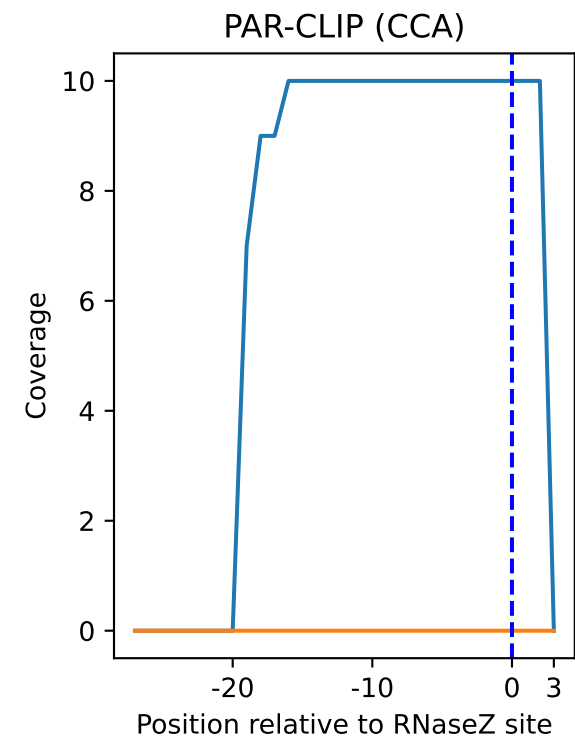

# tRNA-Lys-CTT-1-13

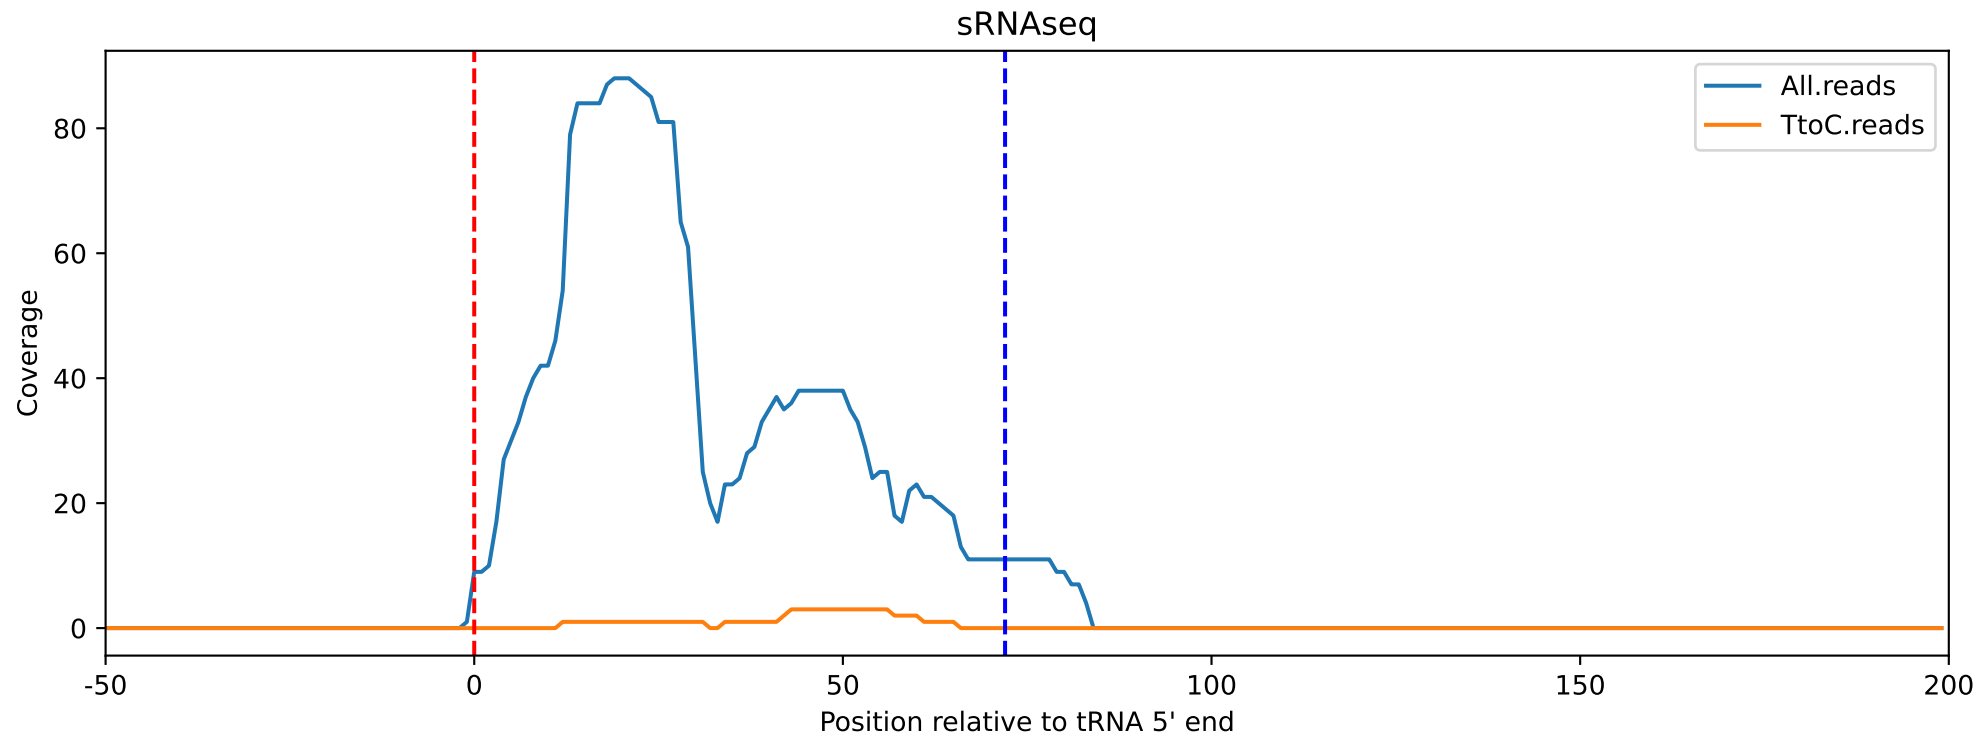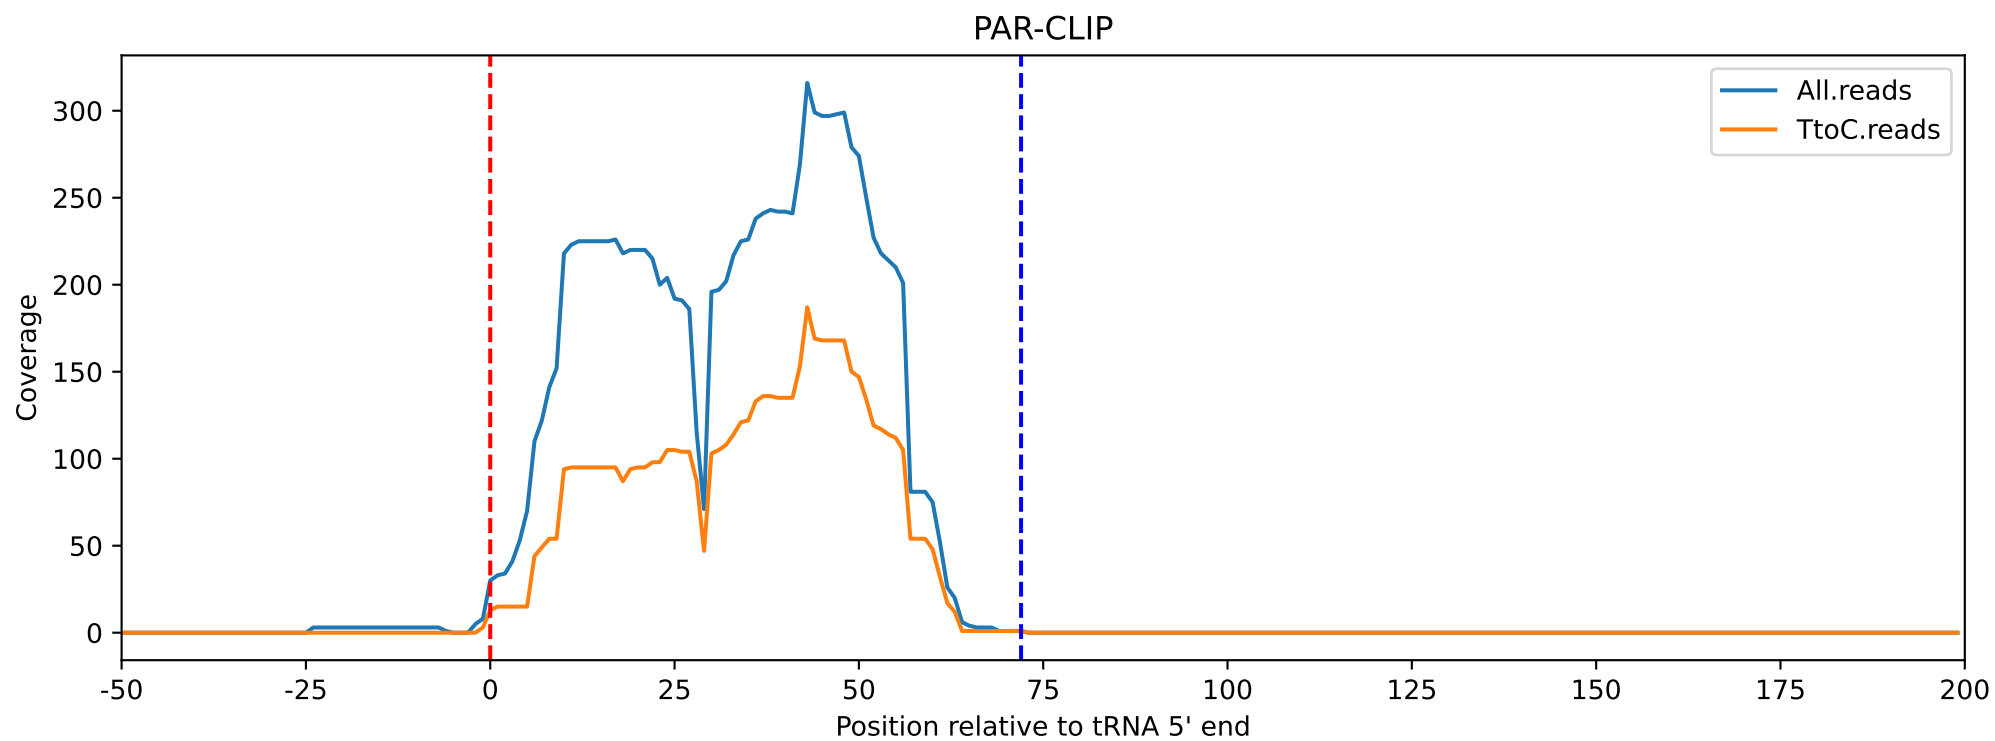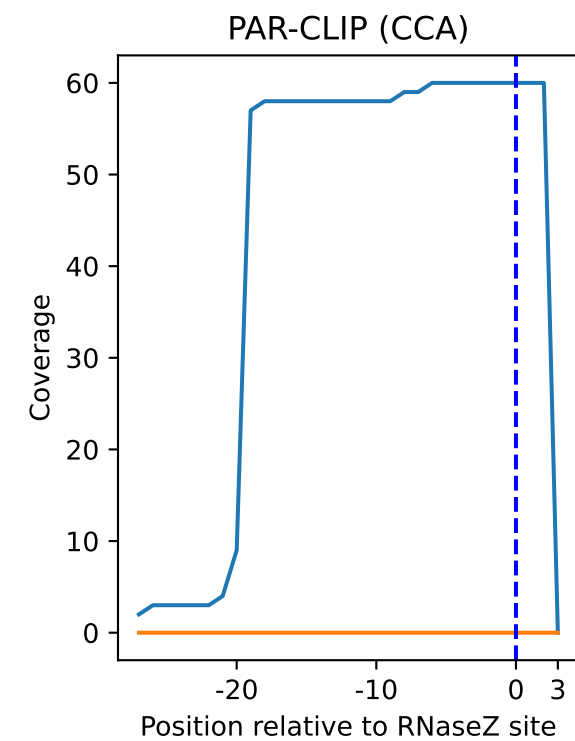

# tRNA-Gln-TTG-1-2

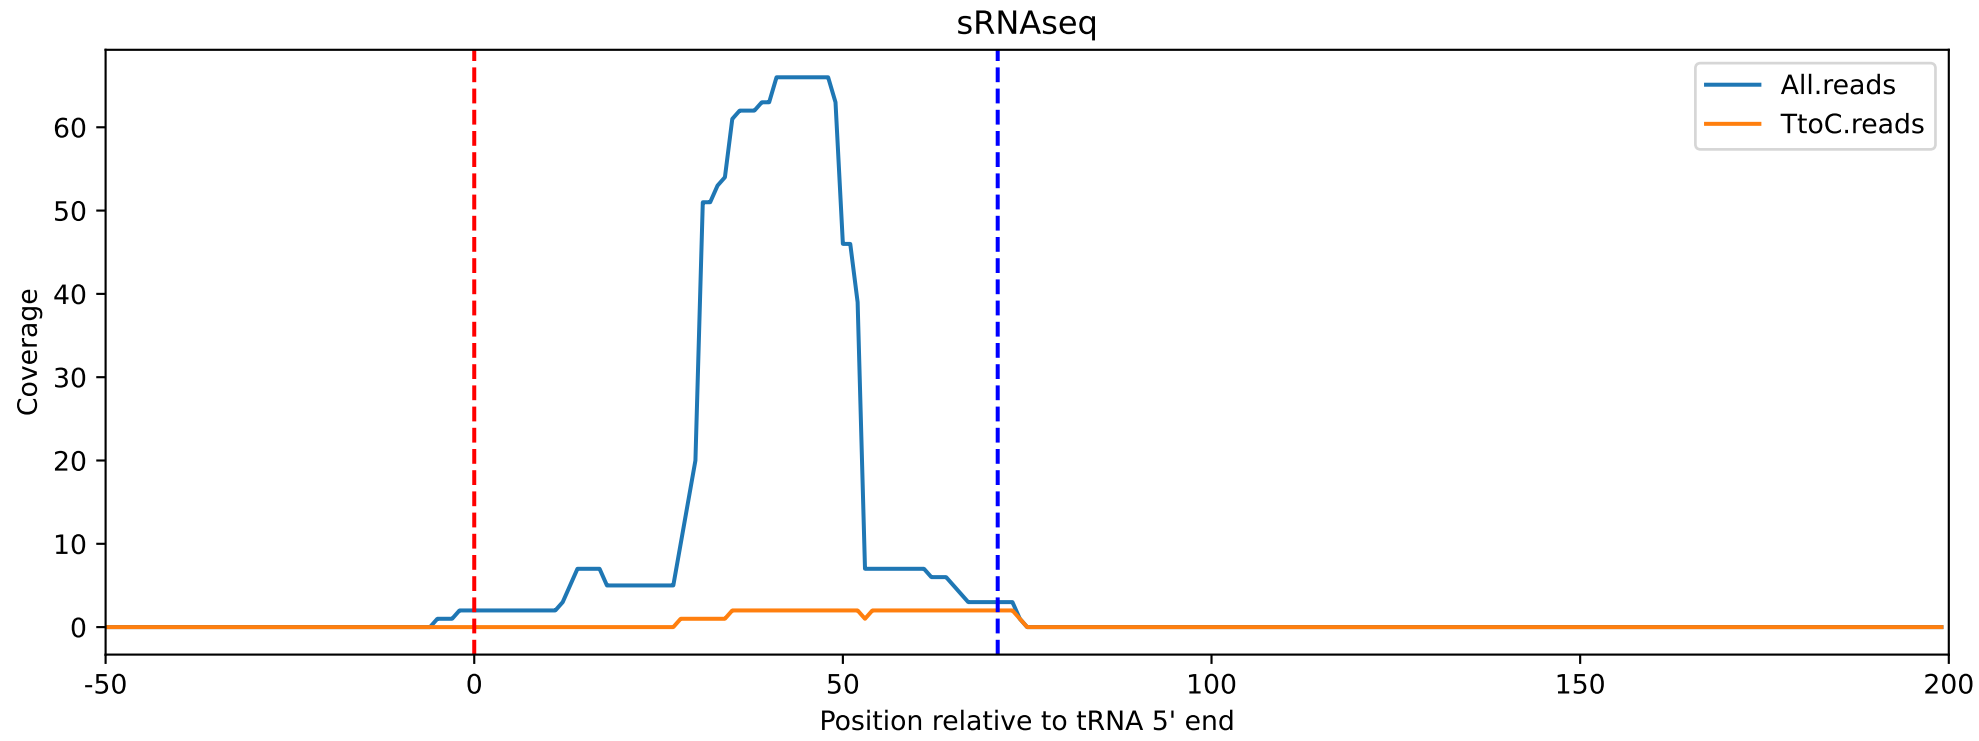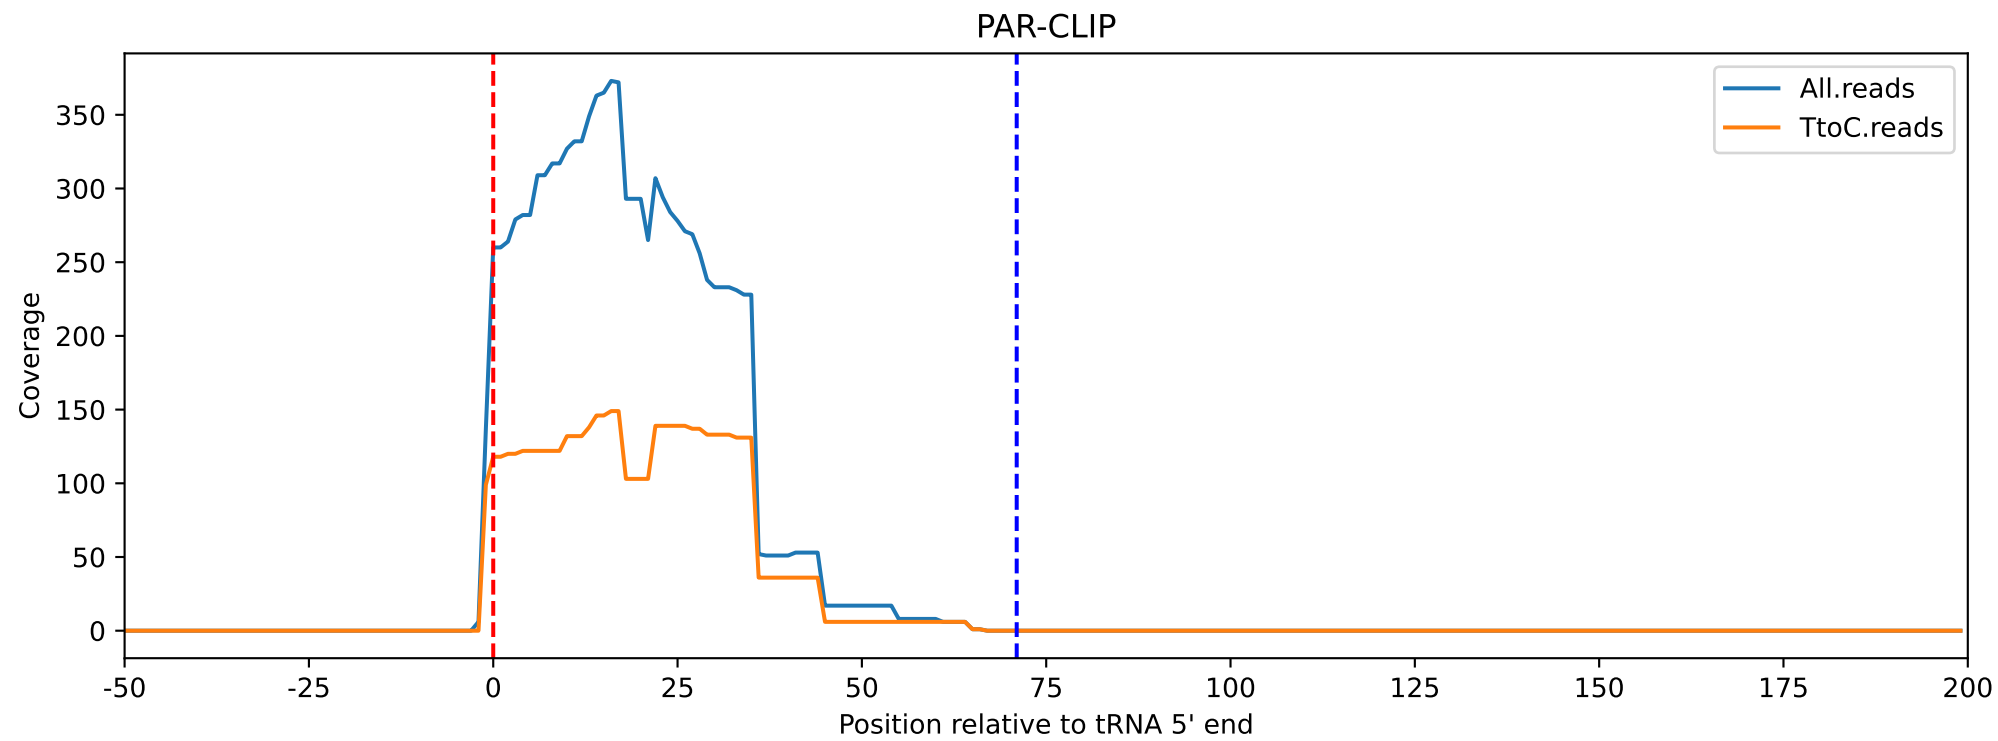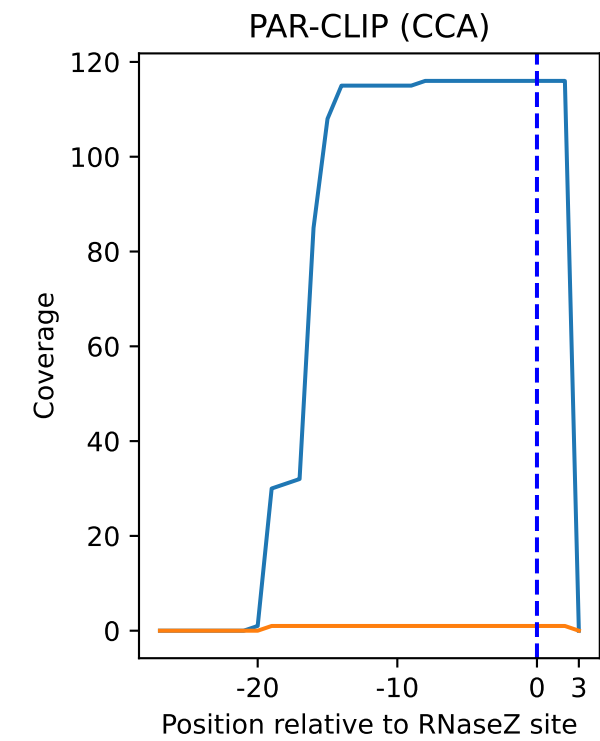

# tRNA-Arg-ACG-1-1

## sRNAseq

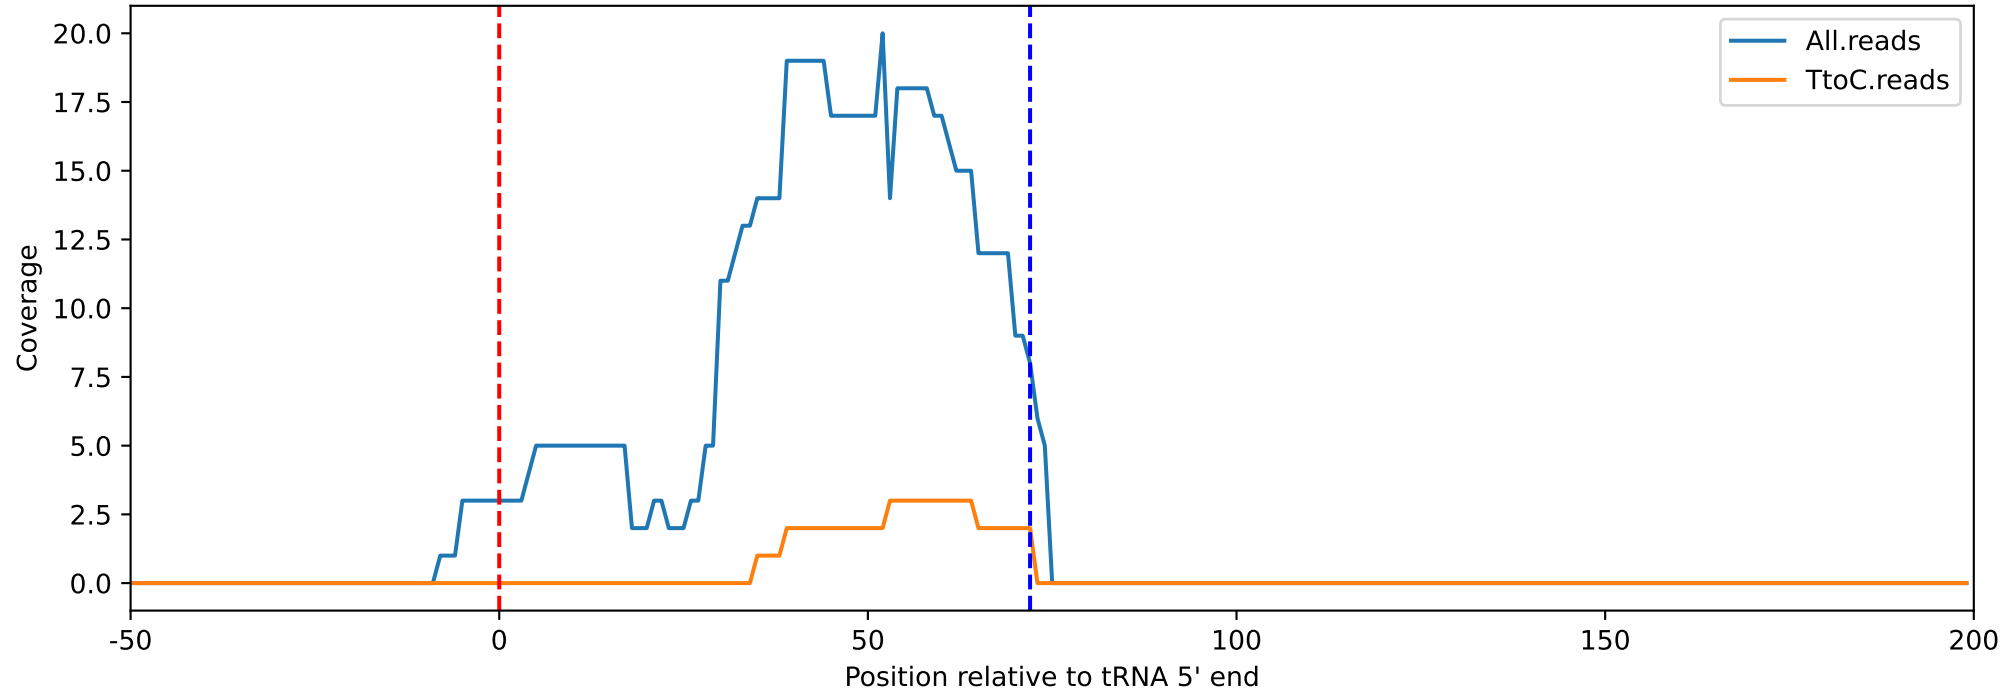

## sRNAseq (CCA)

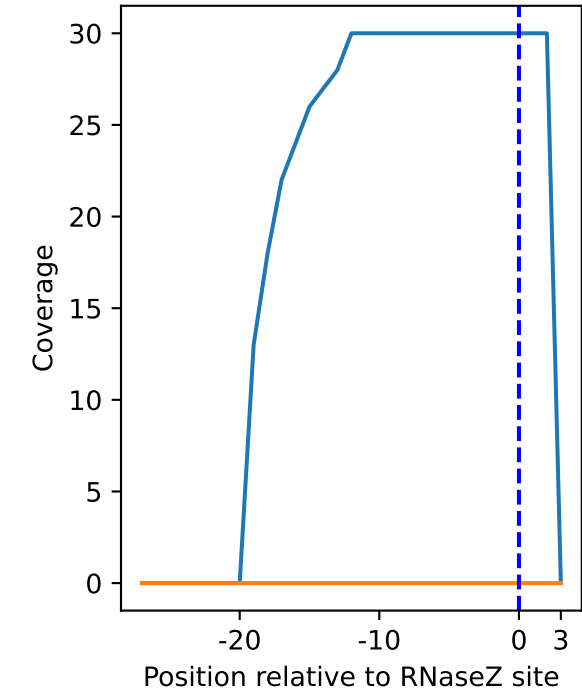

## PAR-CLIP

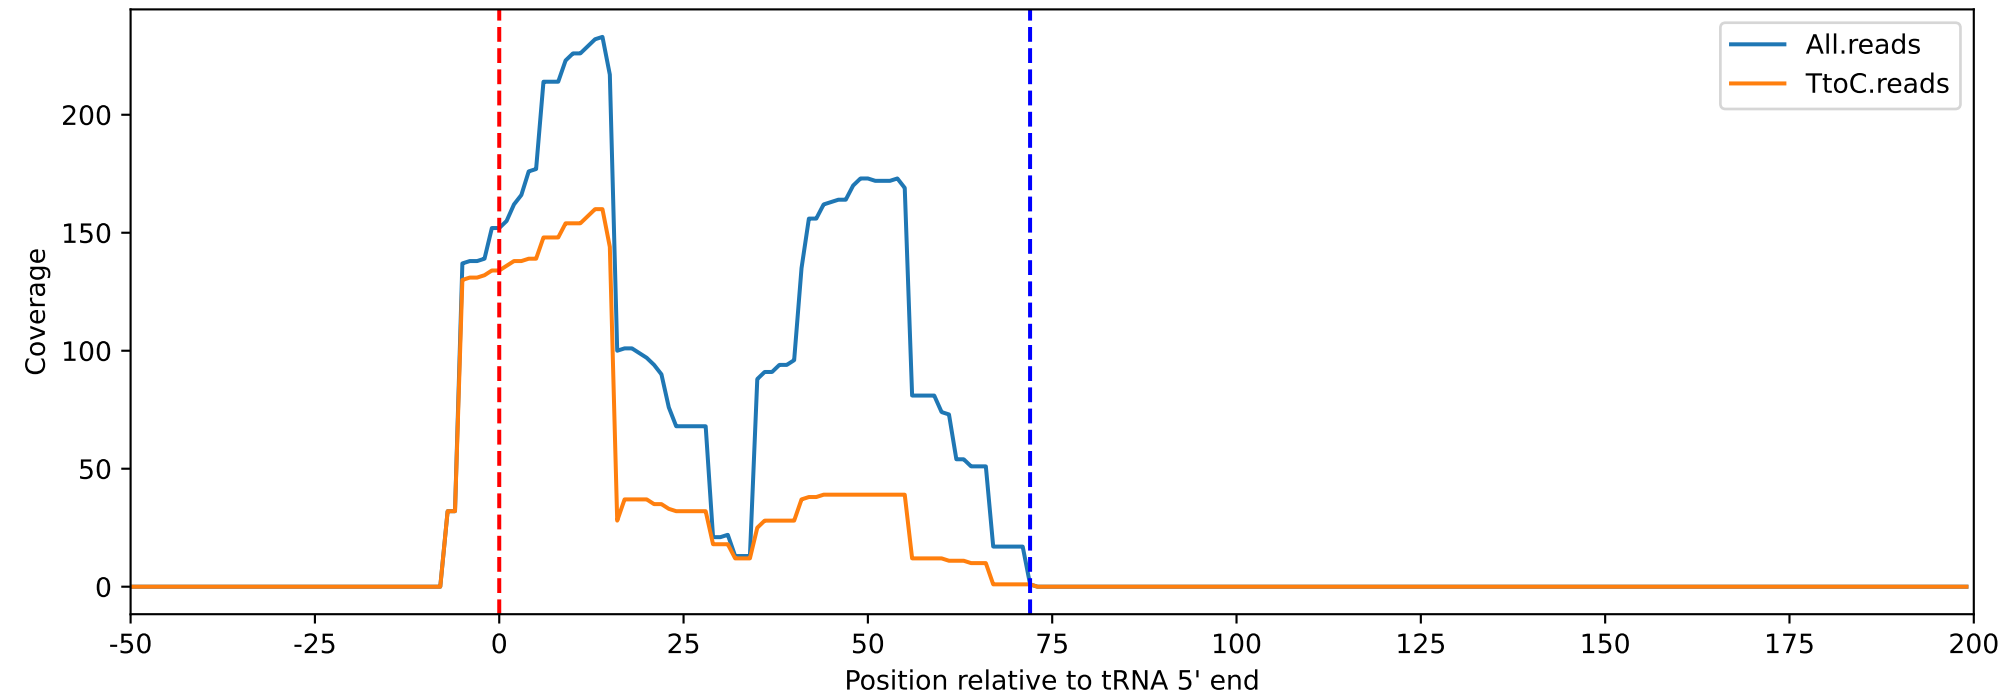

## PAR-CLIP (CCA)

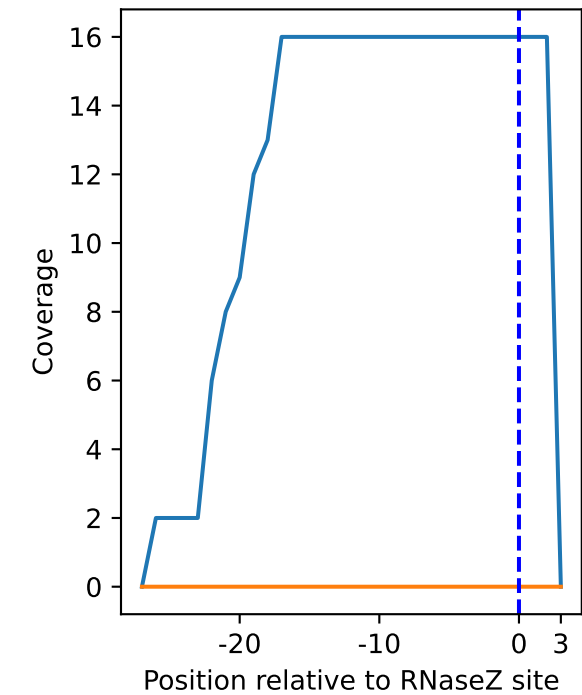



# tRNA-Lys-CTT-1-8

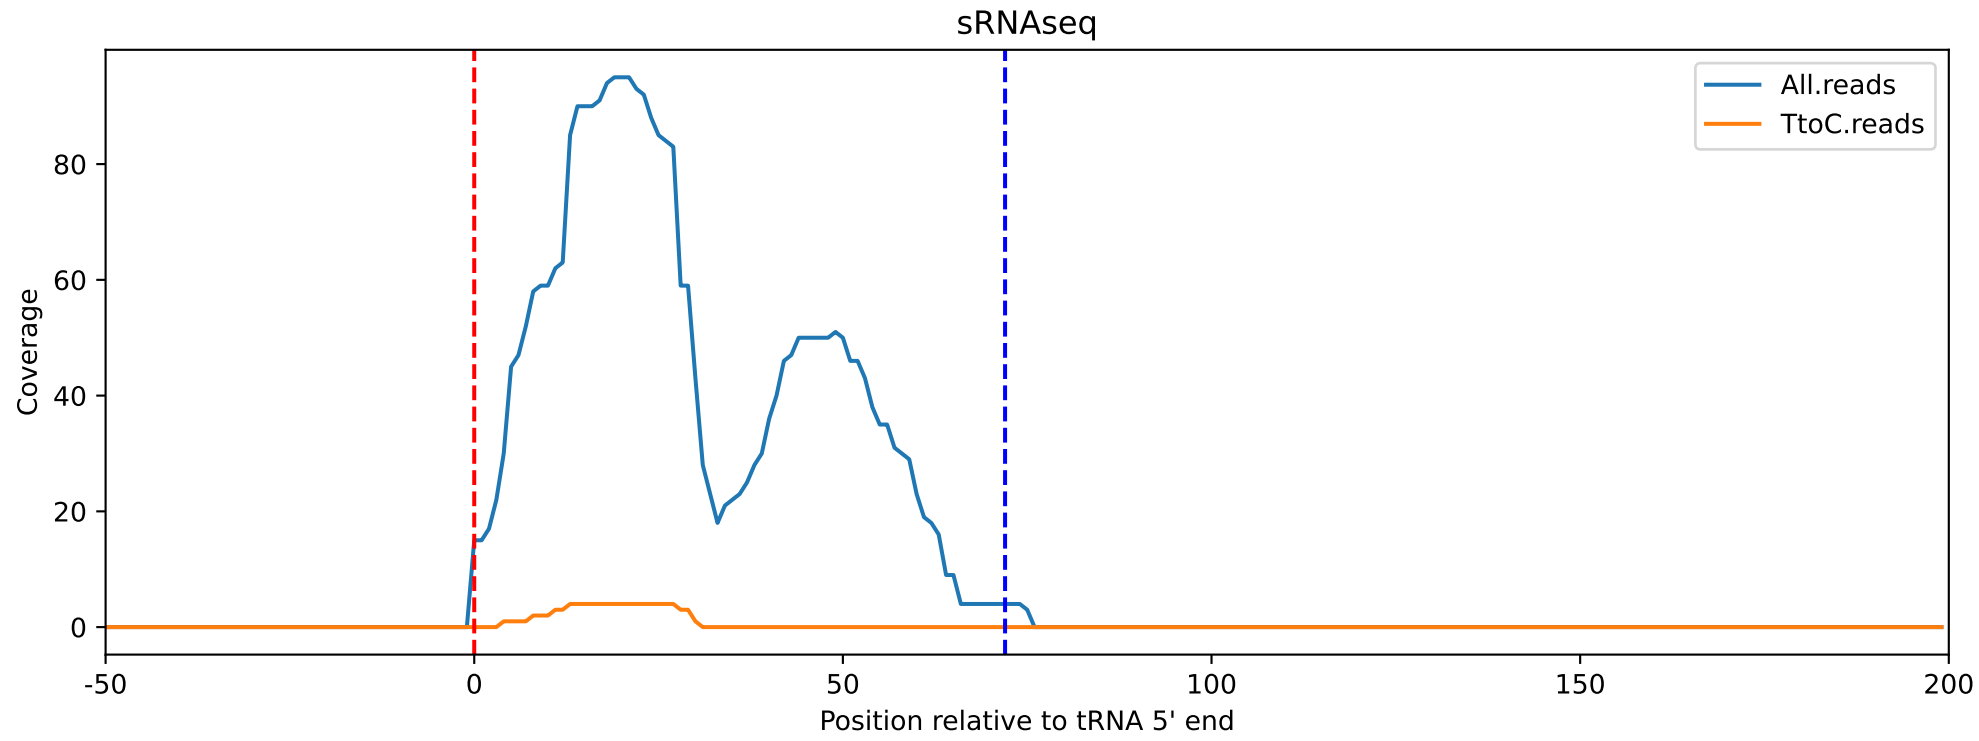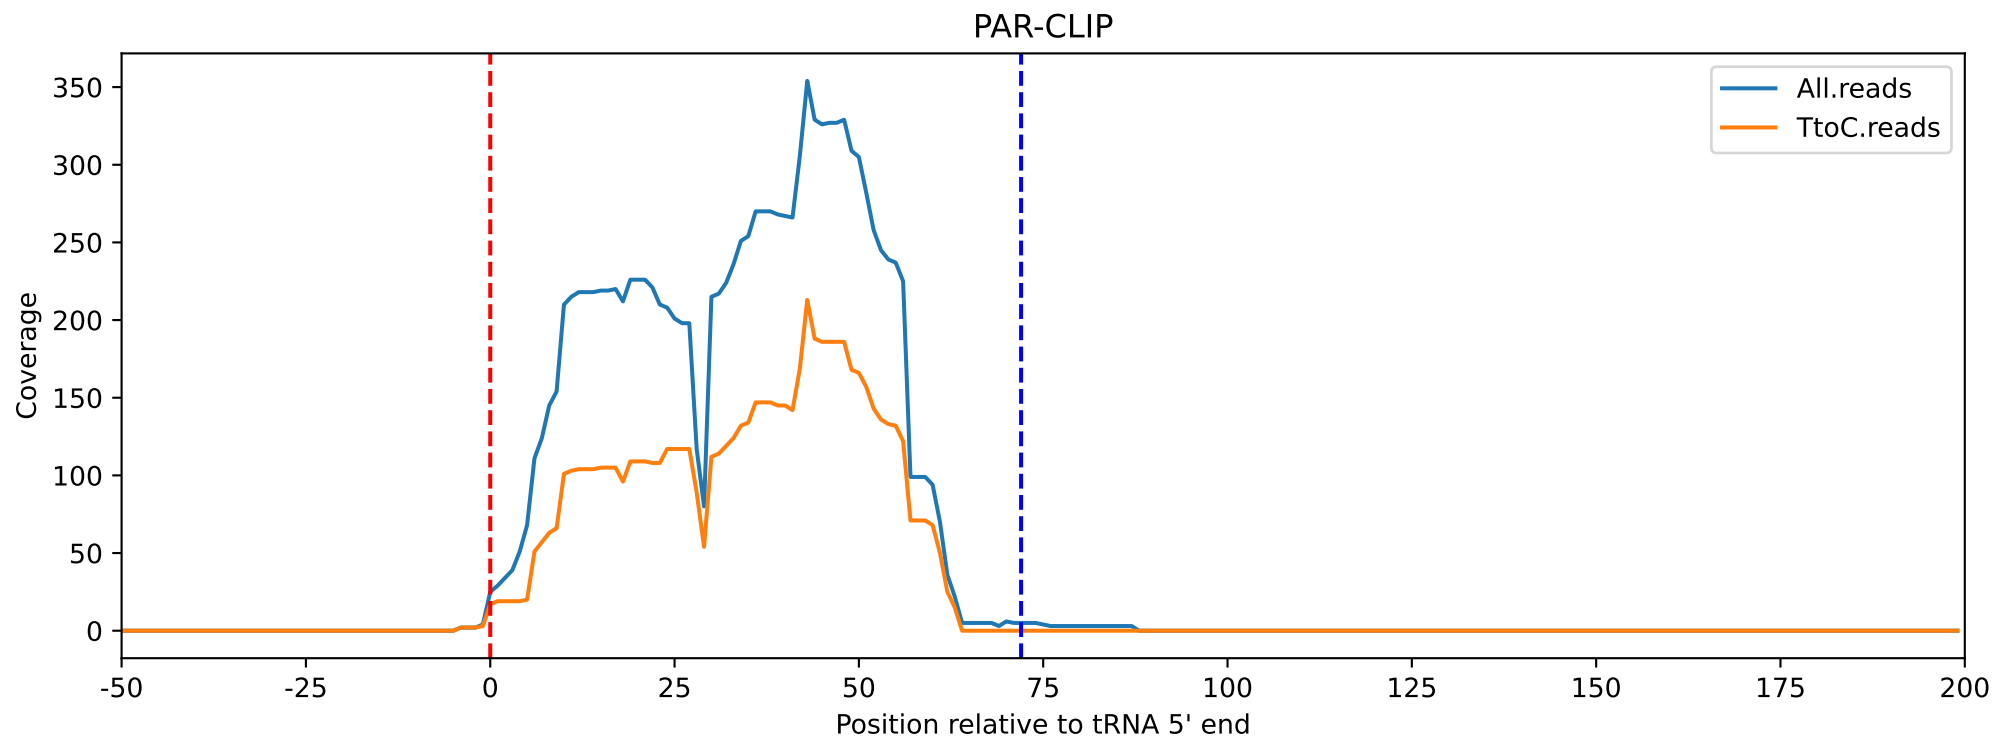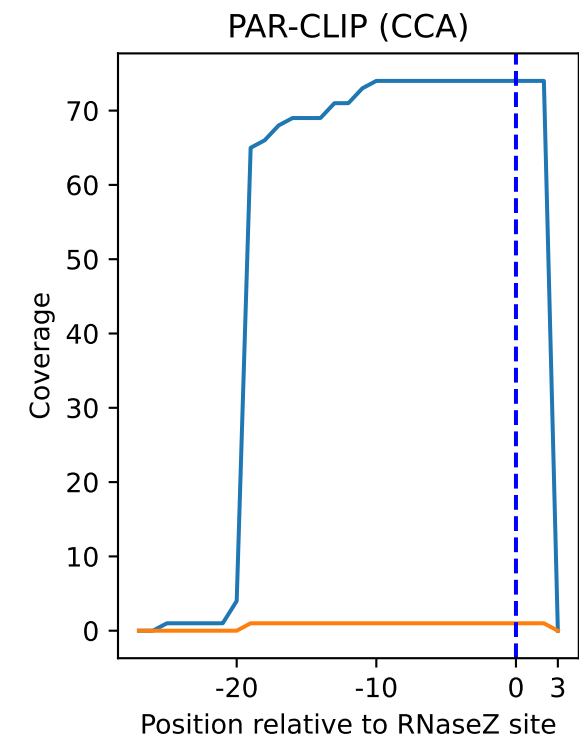

# tRNA-Gly-GCC-1-3

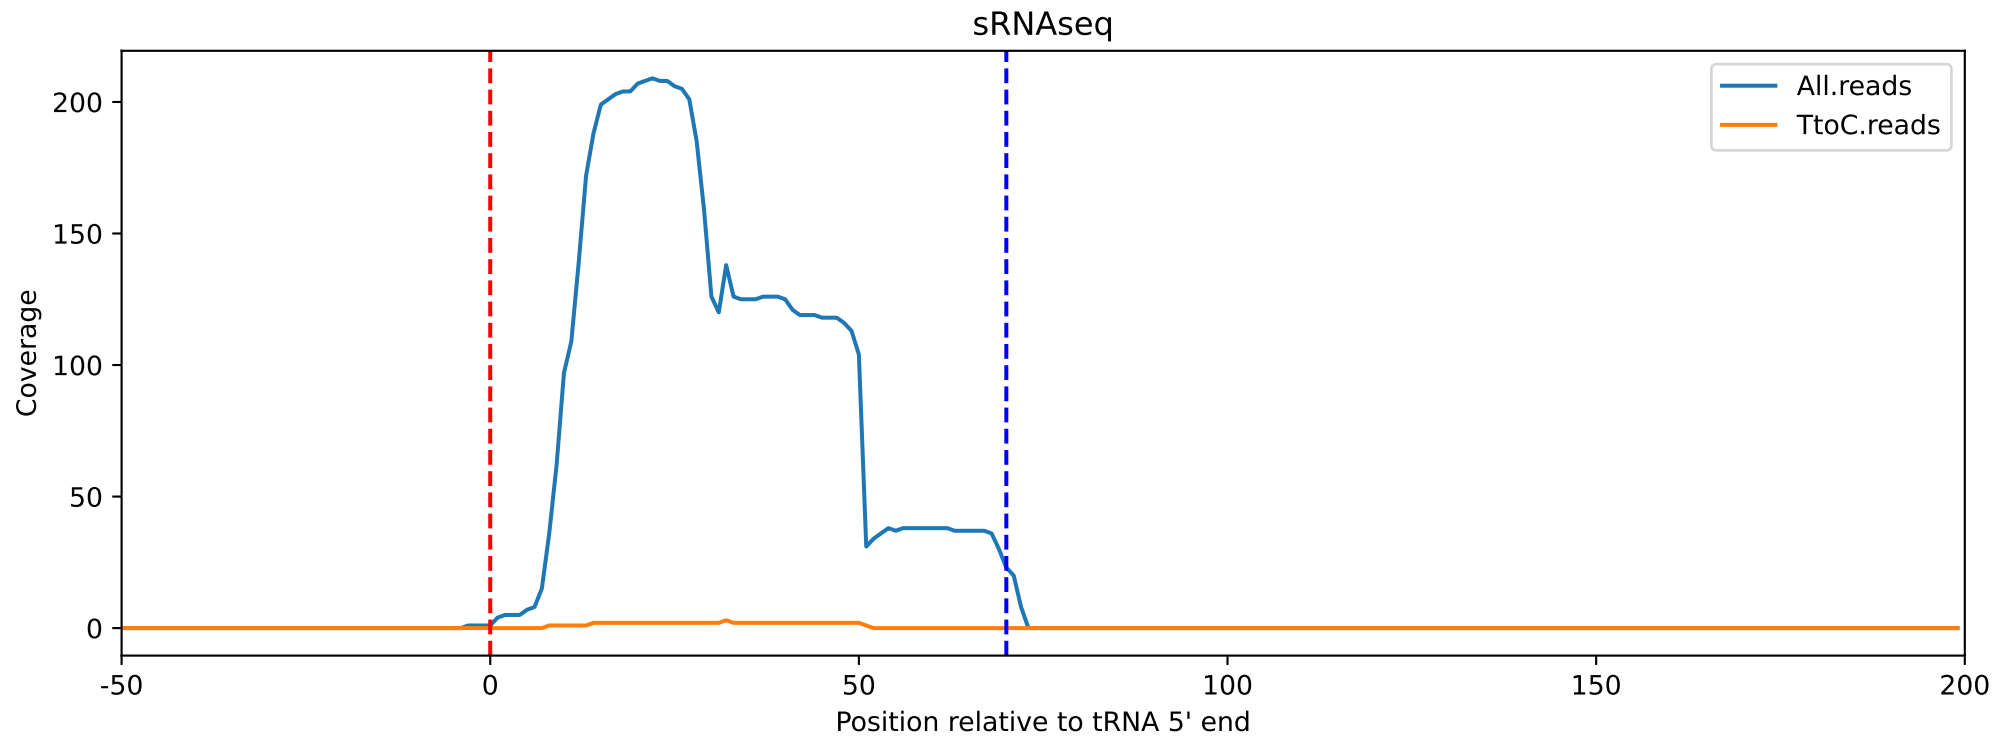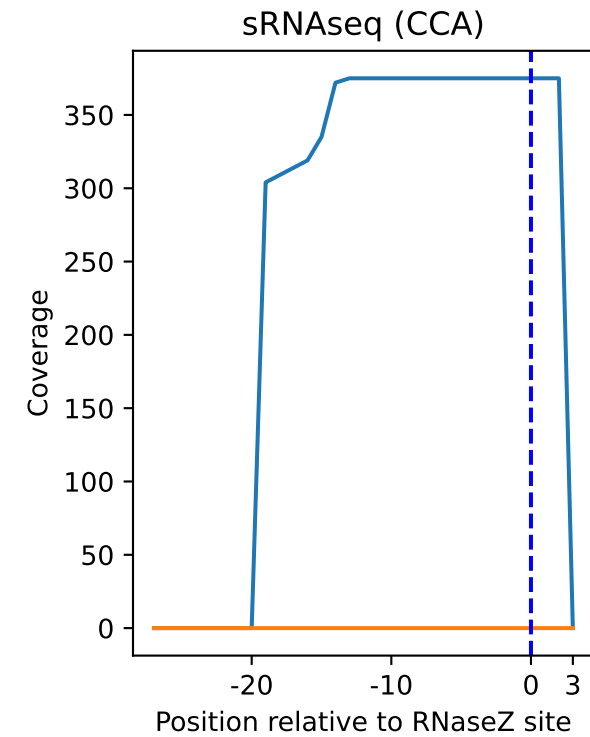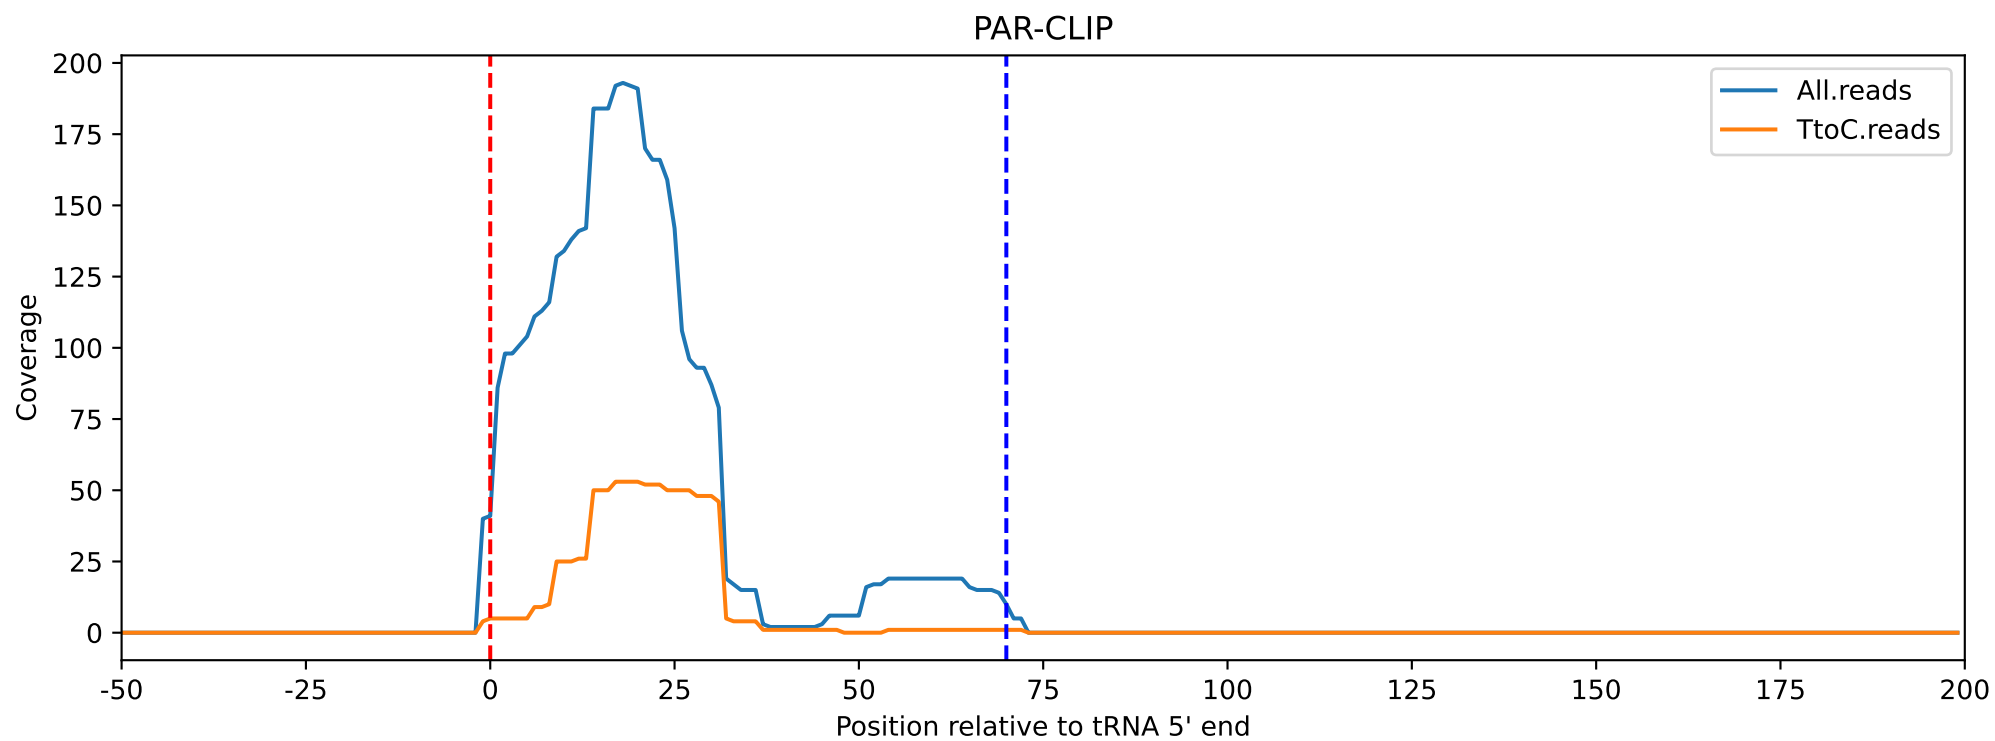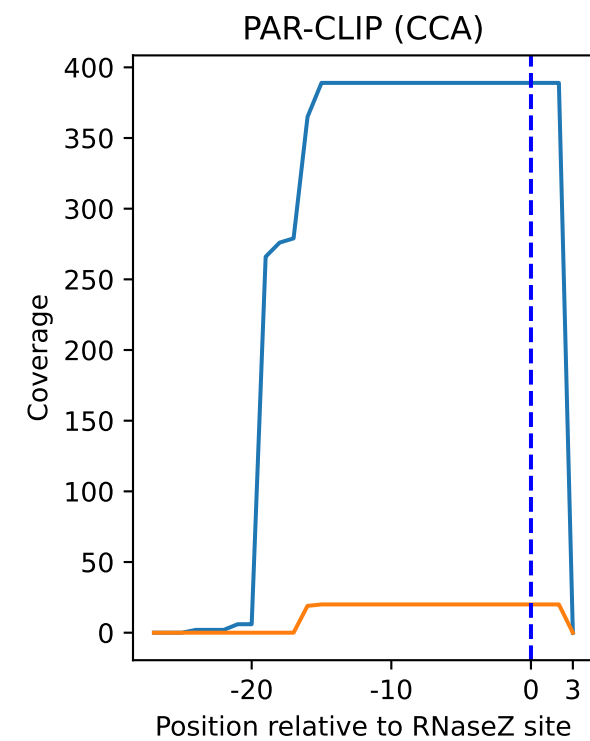

# tRNA-Asp-GTC-1-7

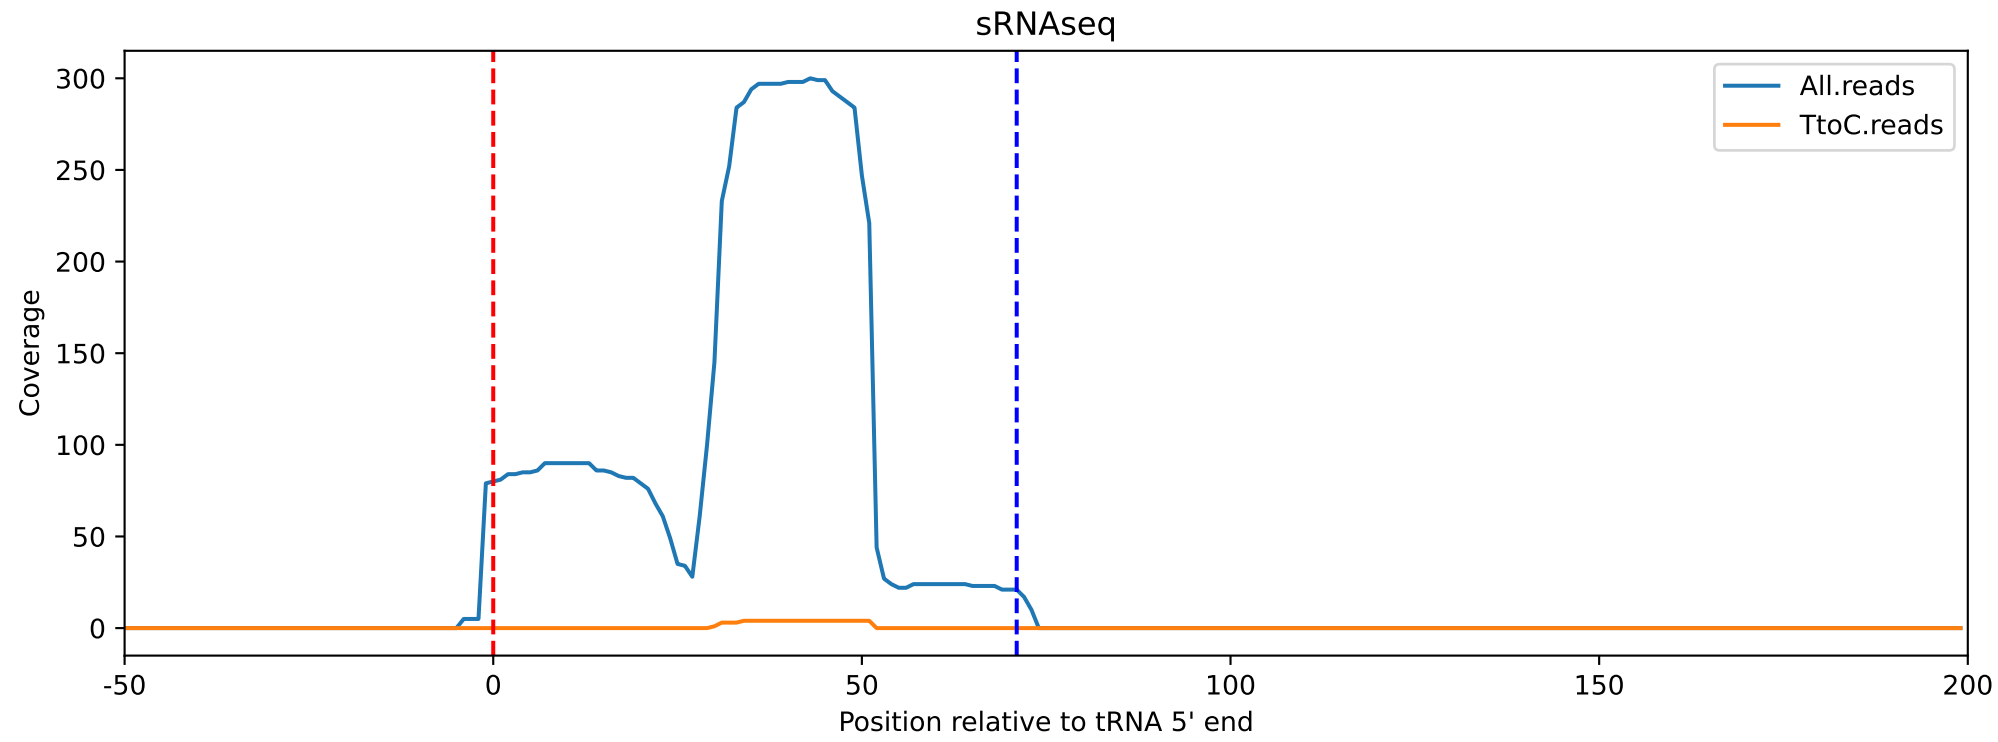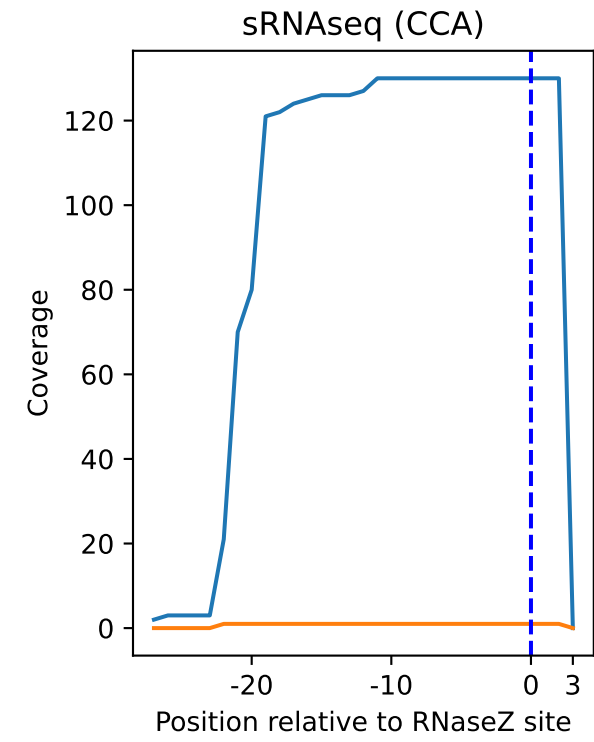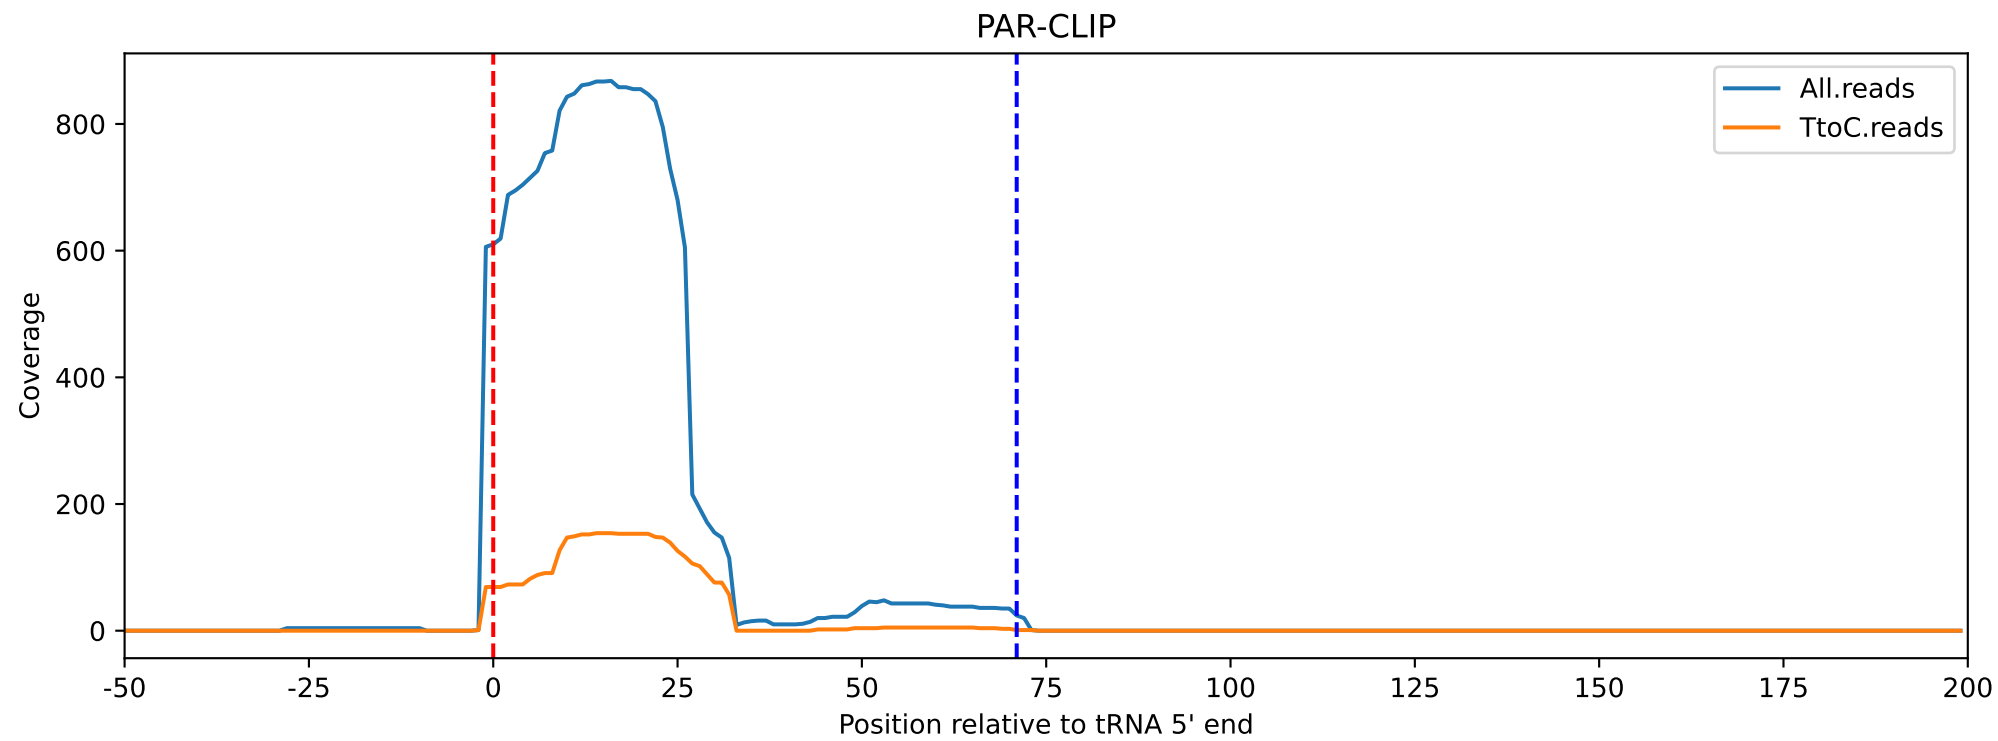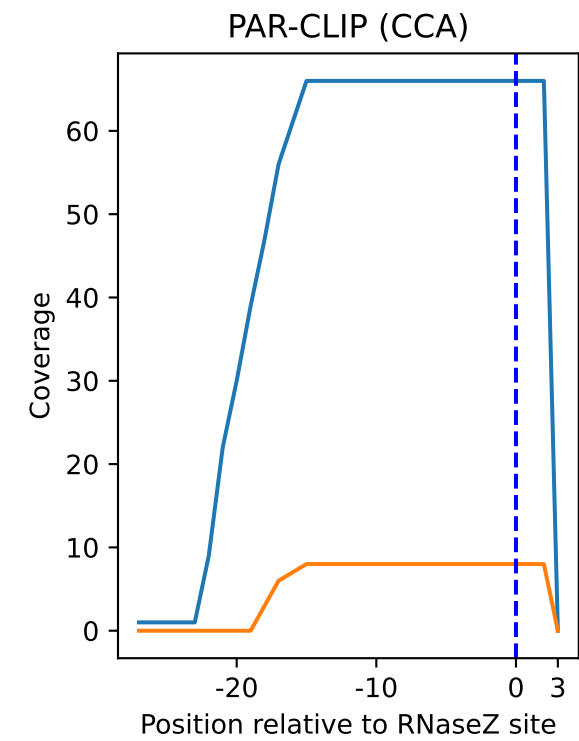

# tRNA-Glu-TTC-1-6

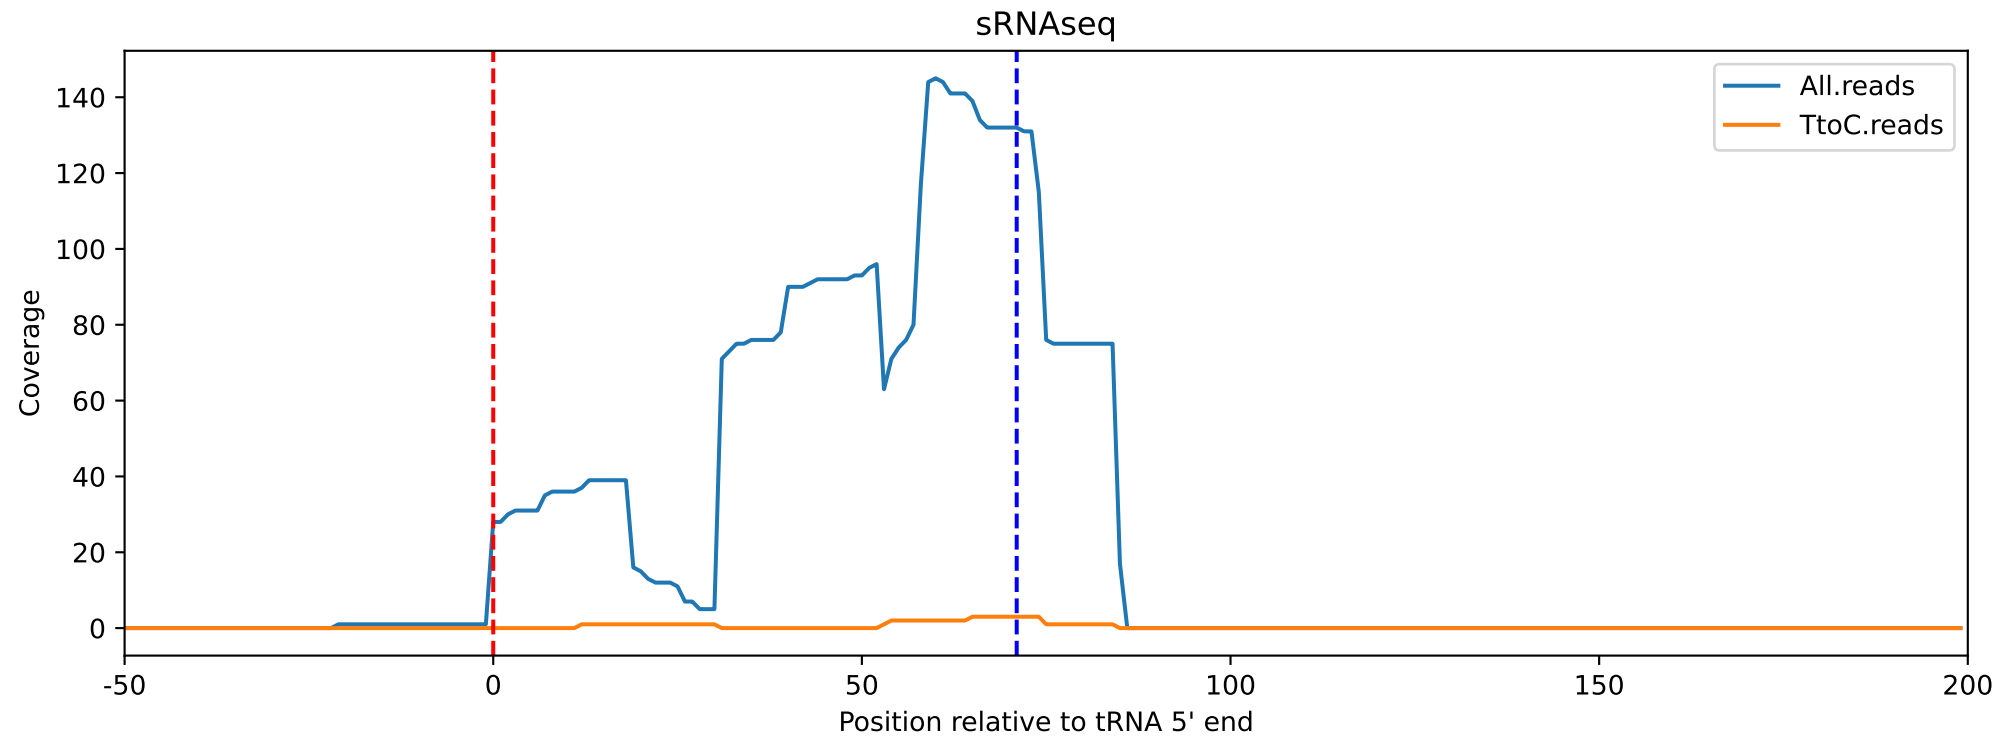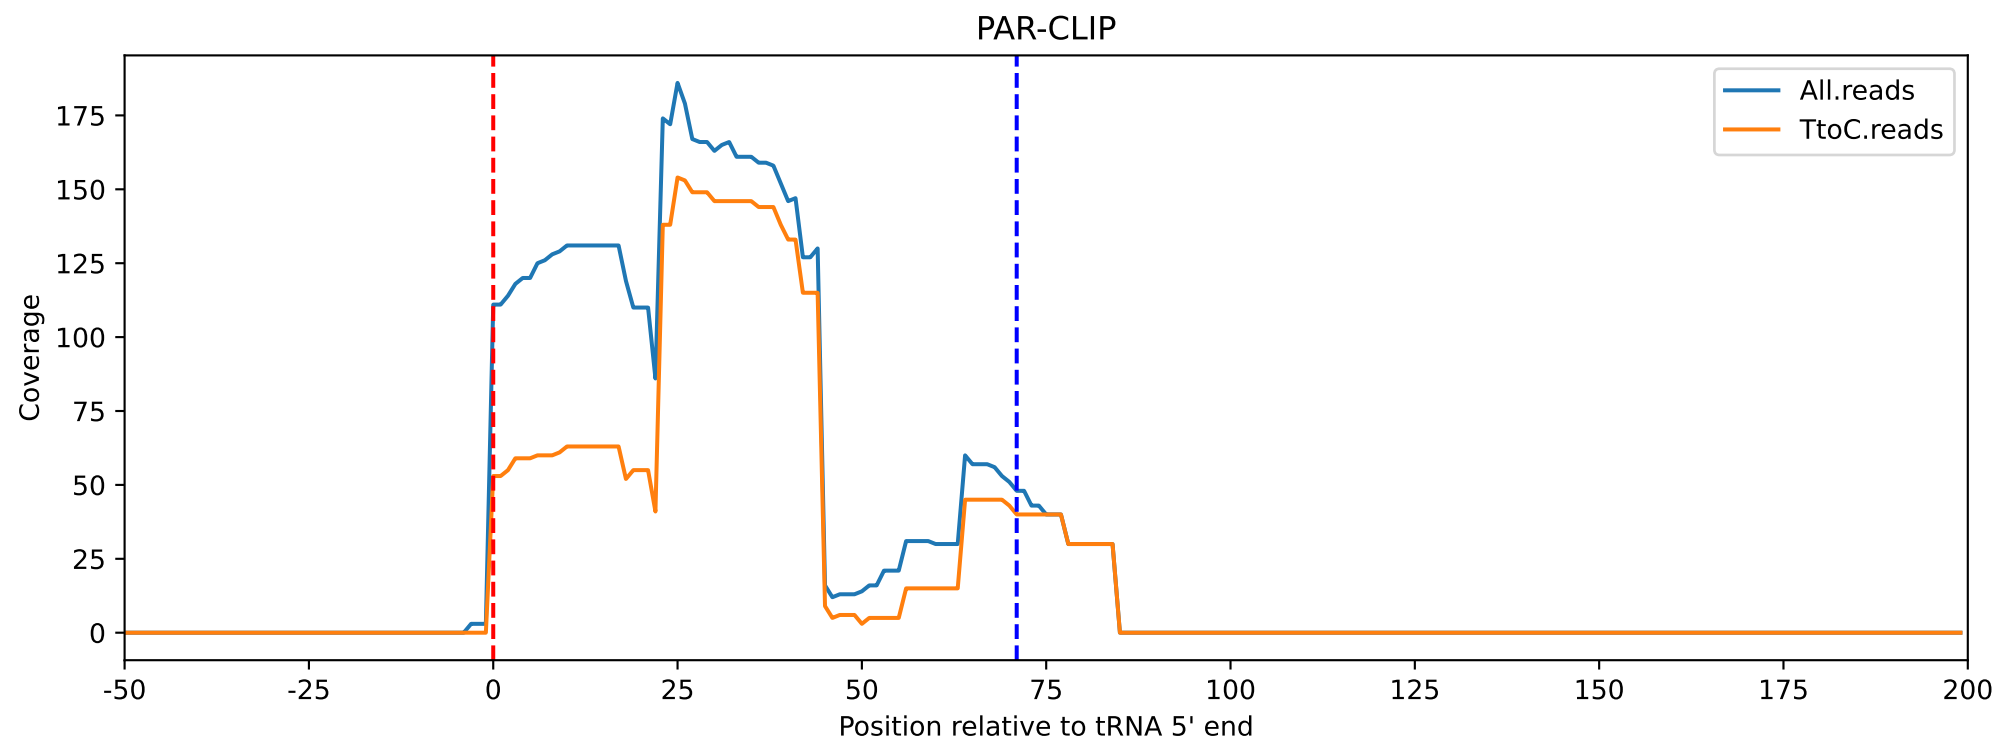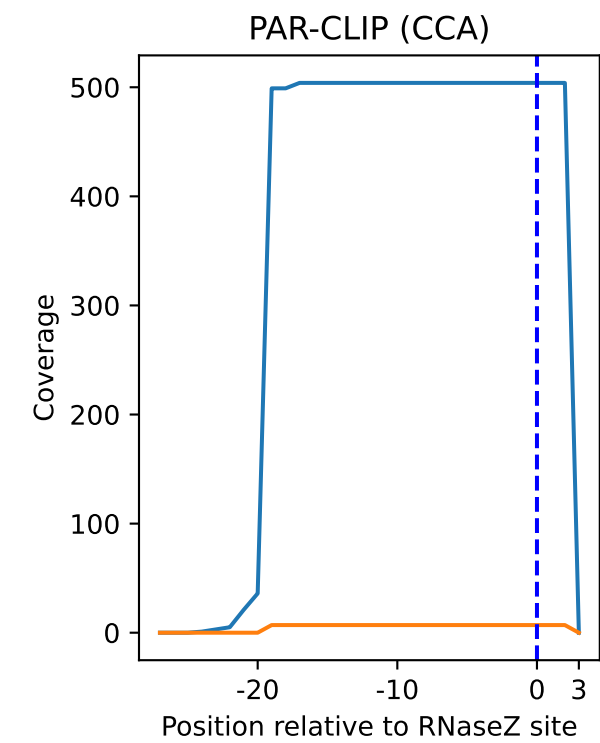

# tRNA-Pro-AGG-1-6

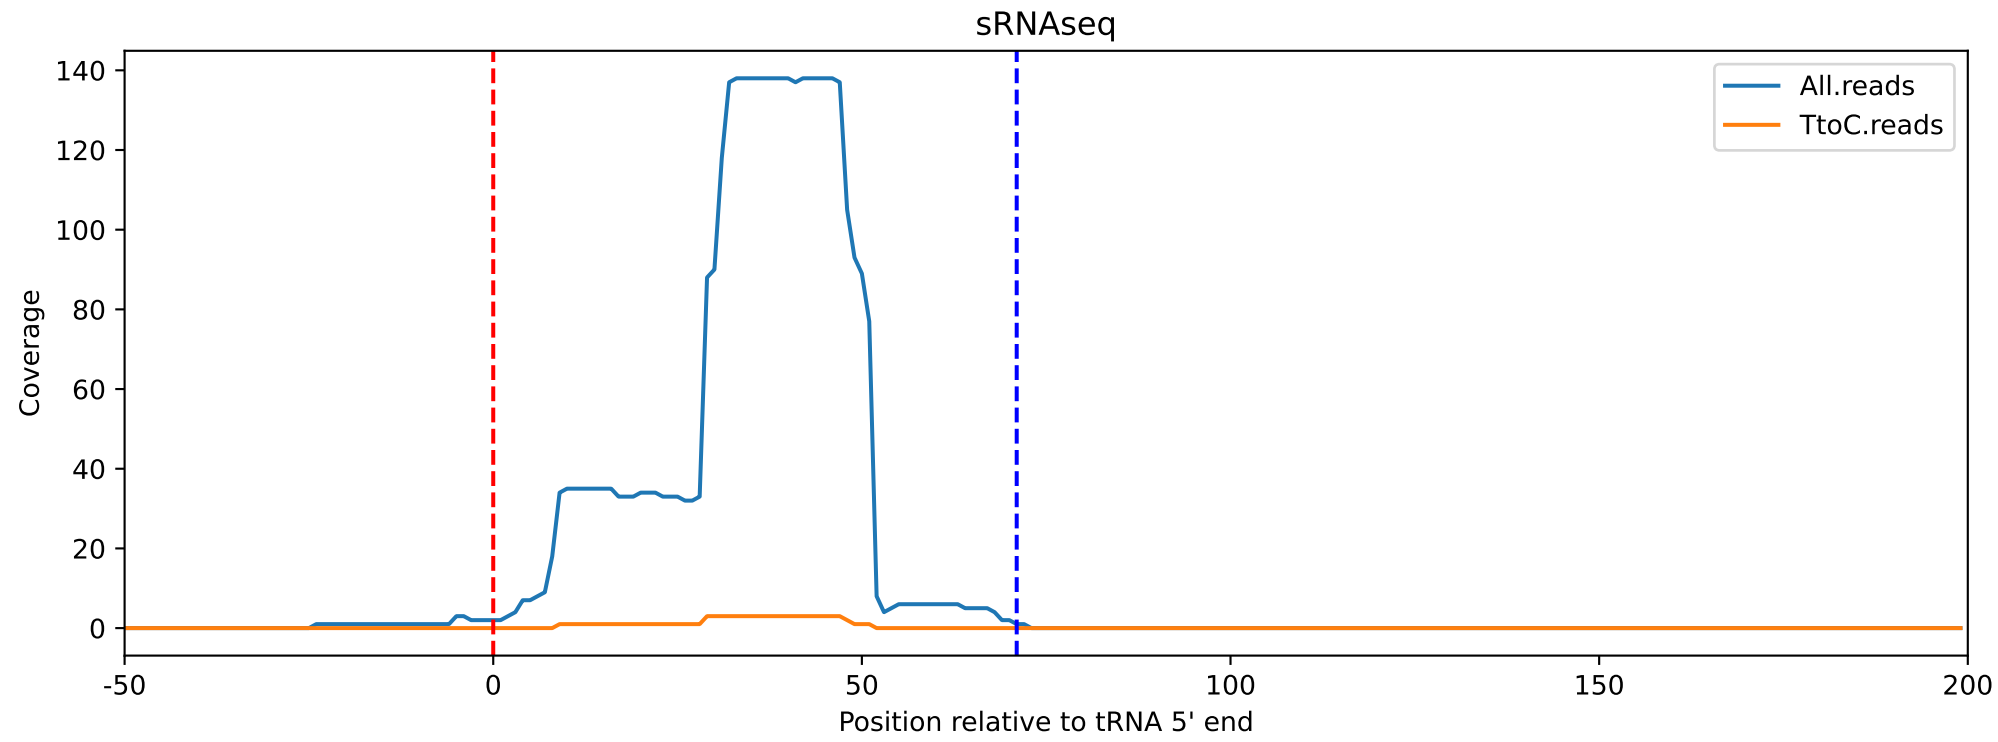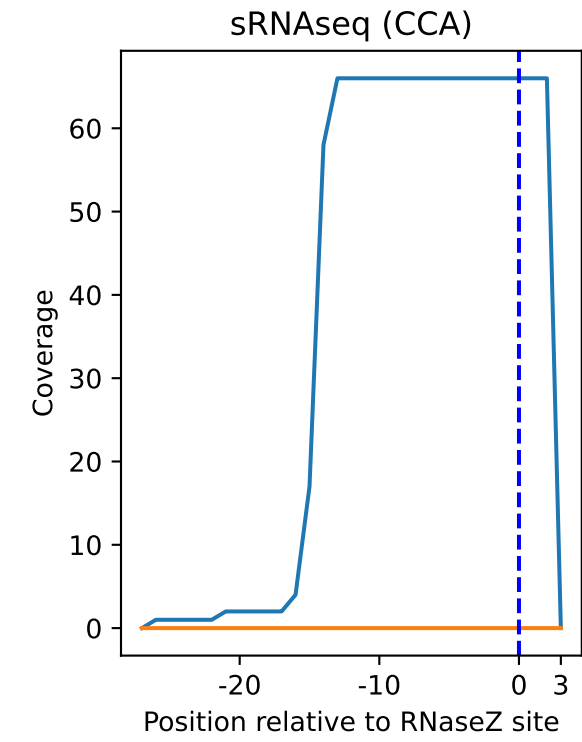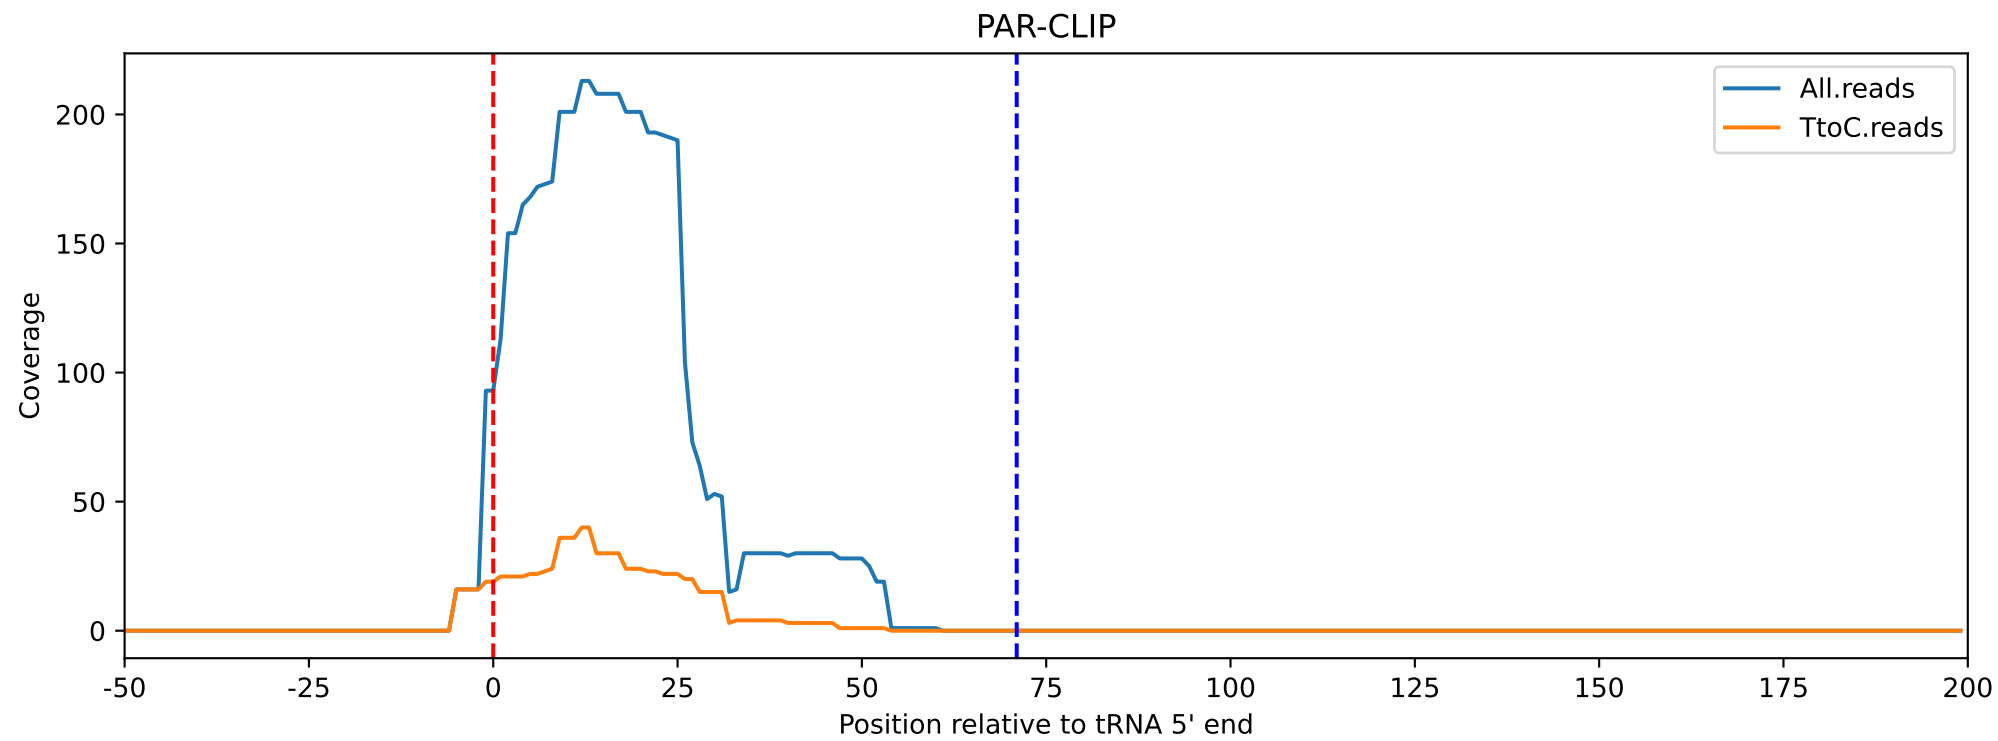

# tRNA-Glu-CTC-3-1

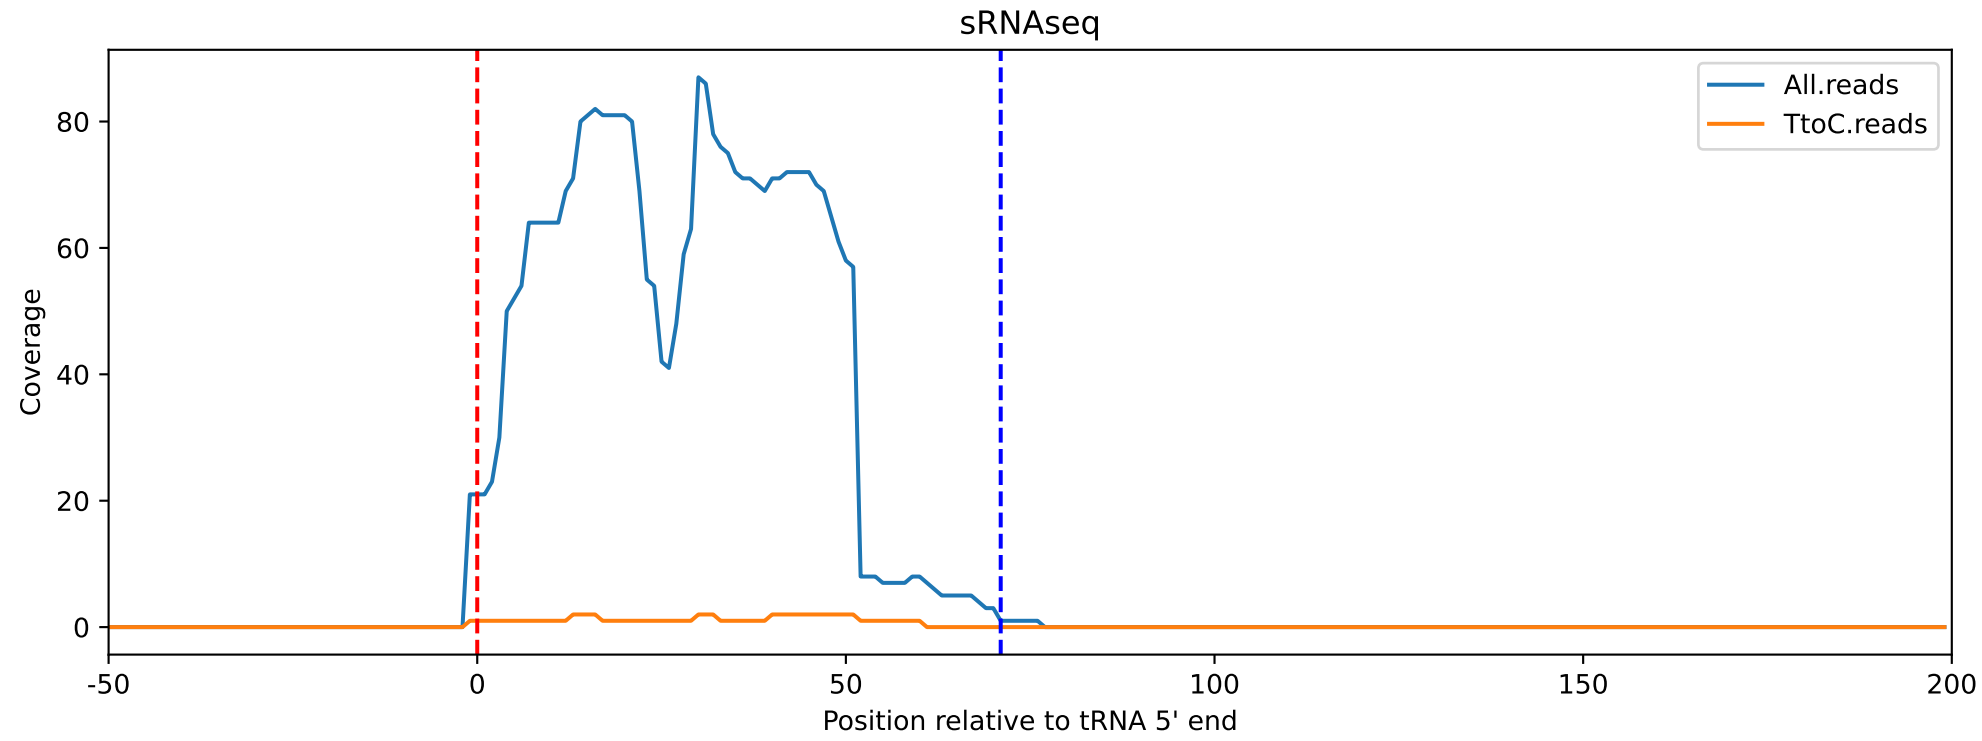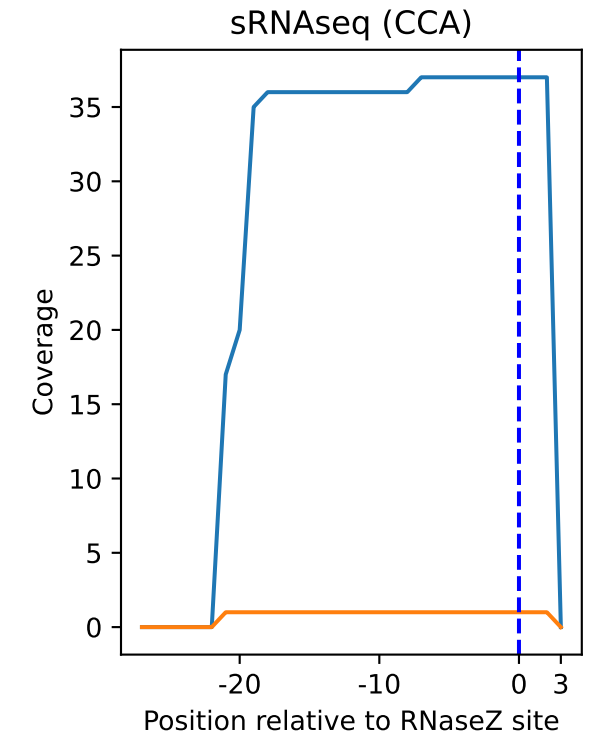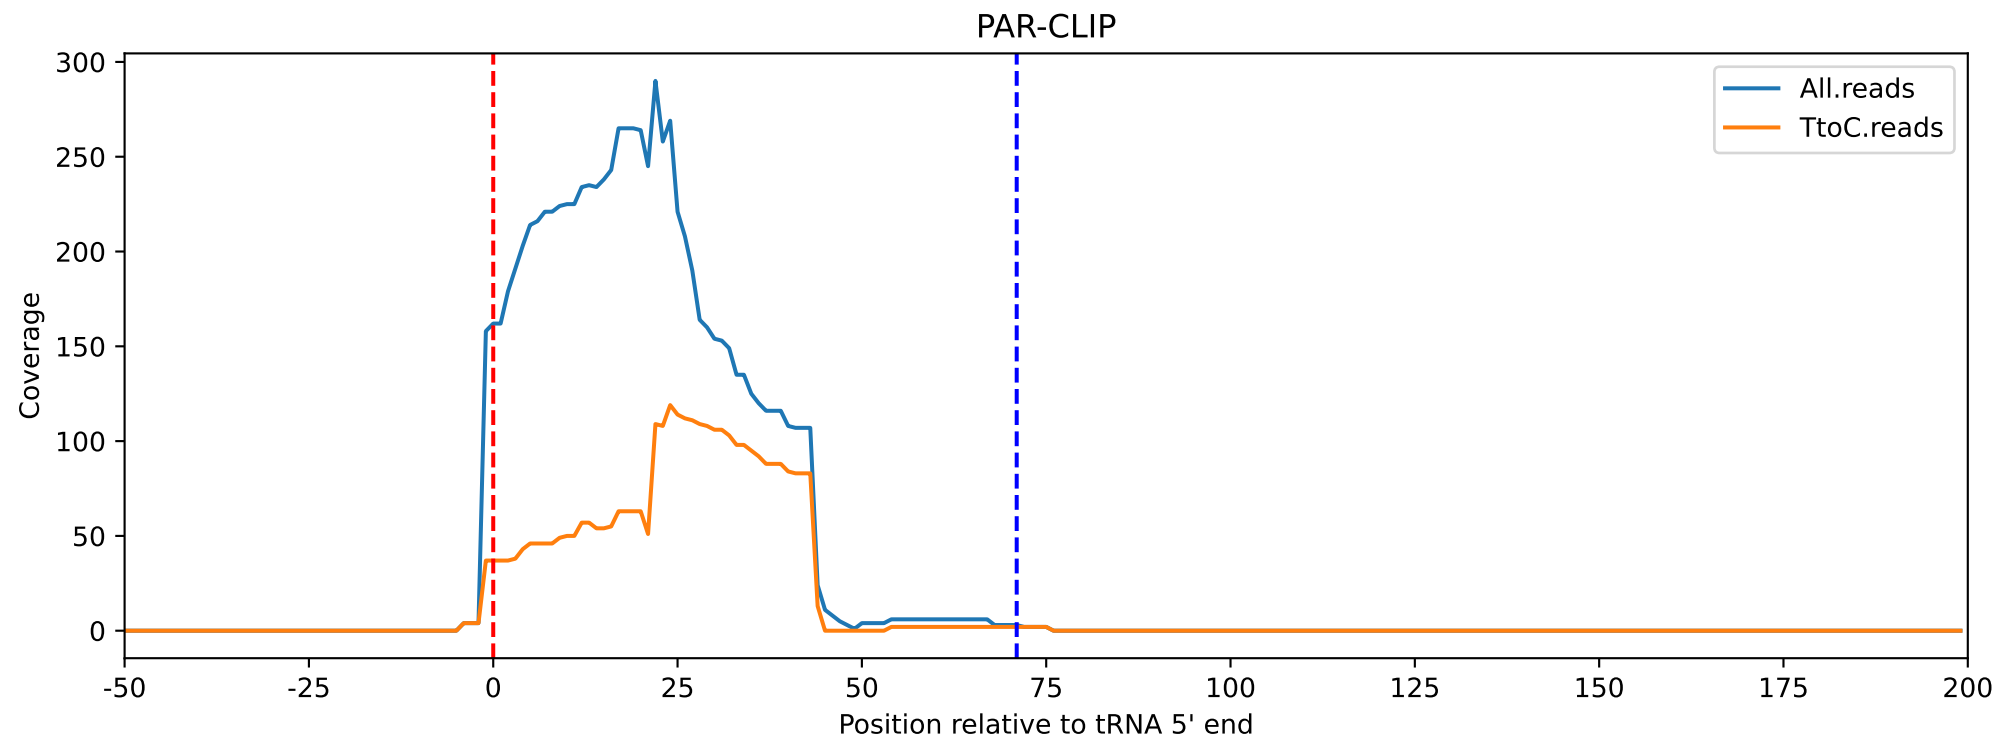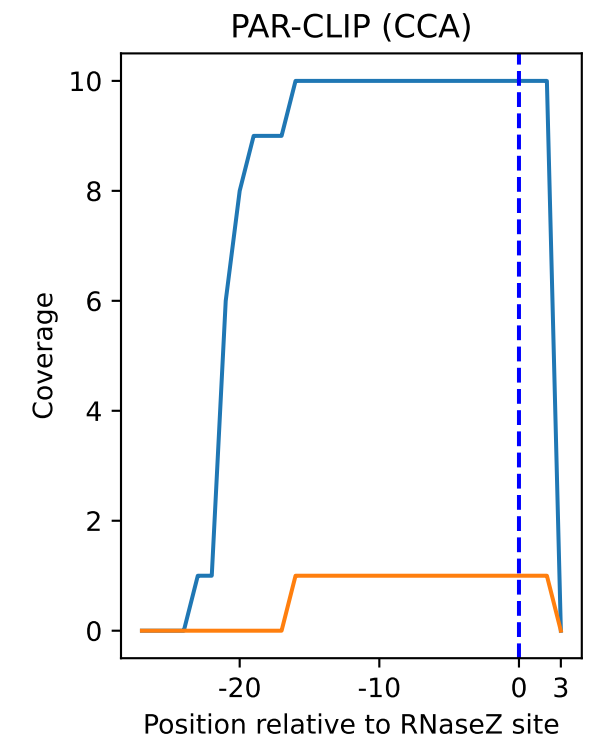

# tRNA-Lys-CTT-1-2

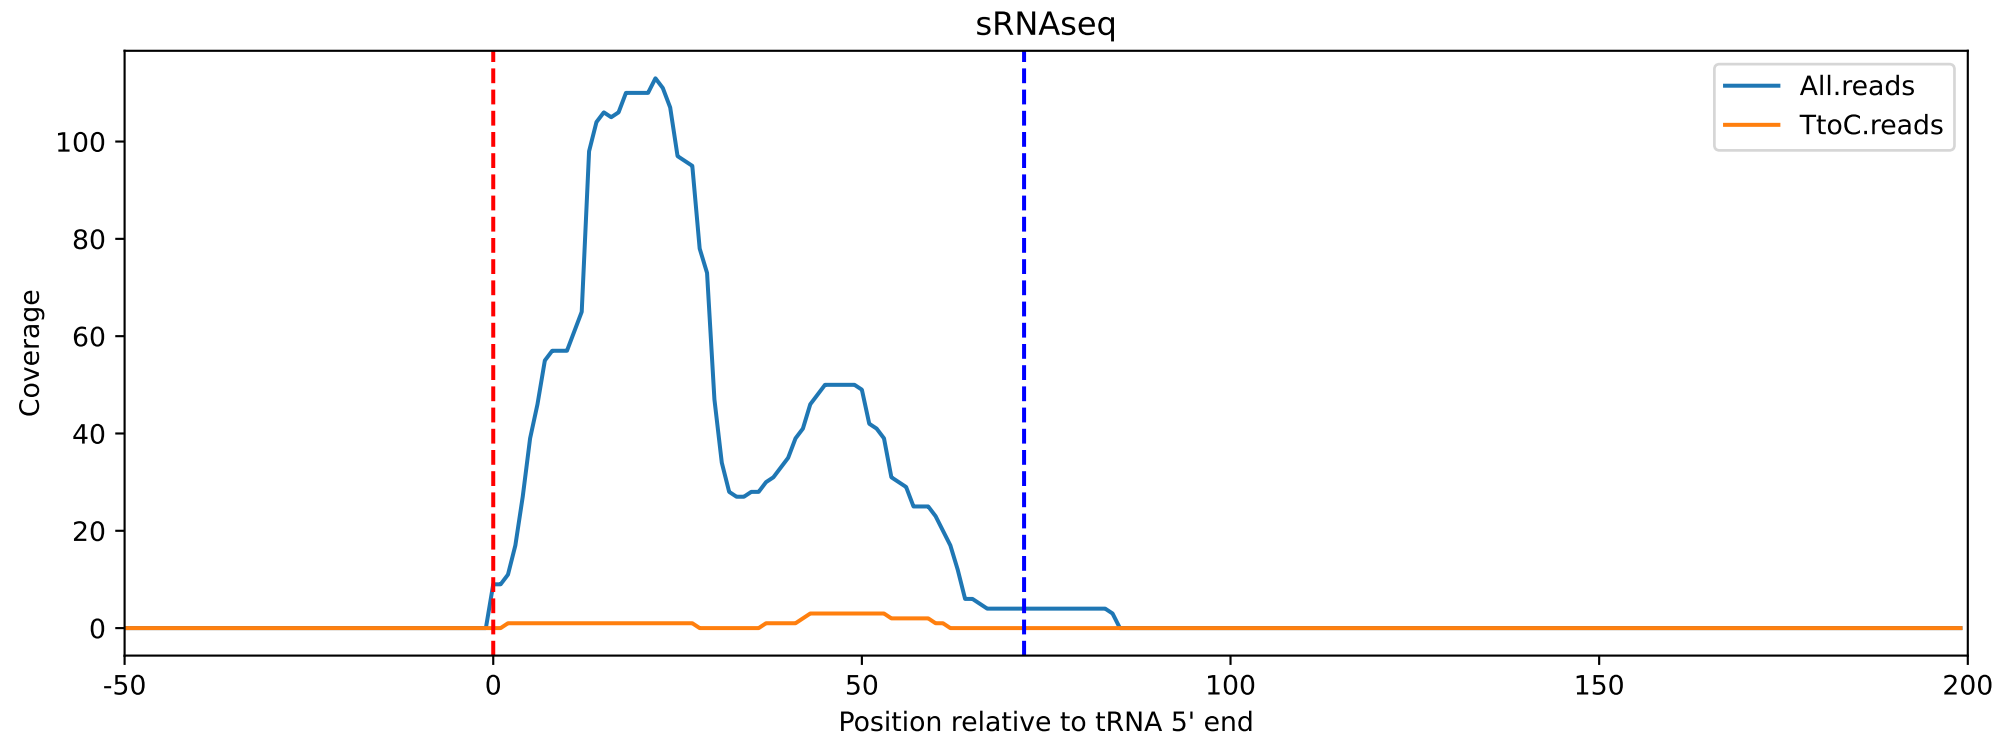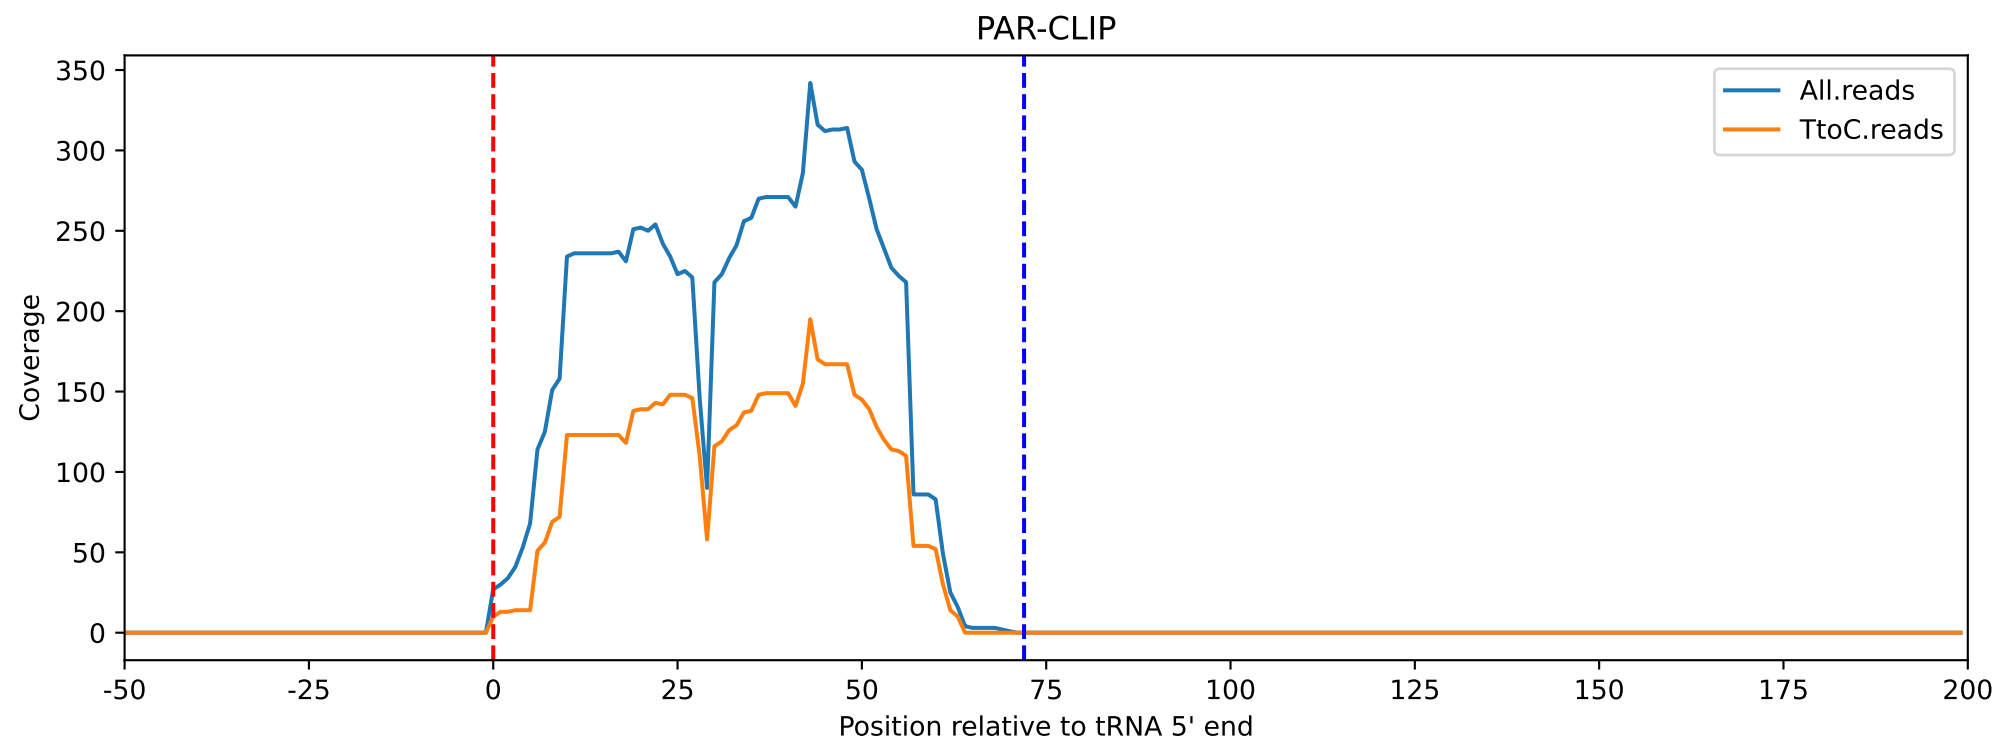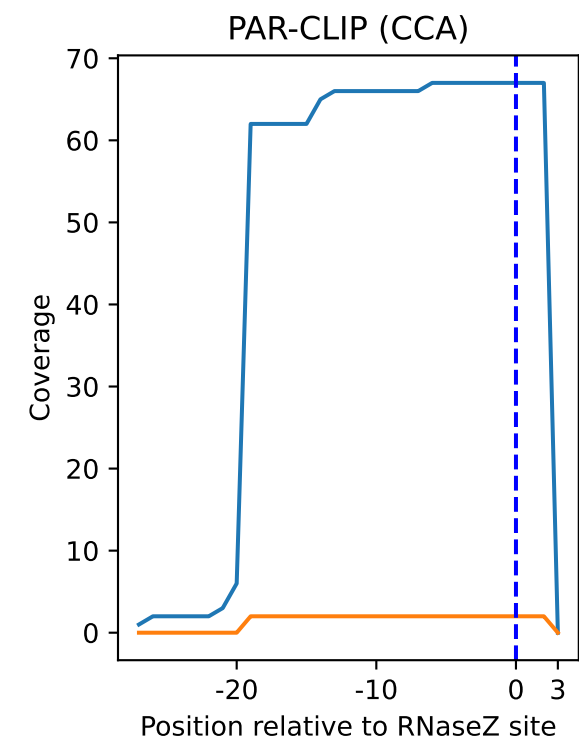

# tRNA-Gly-GCC-1-12

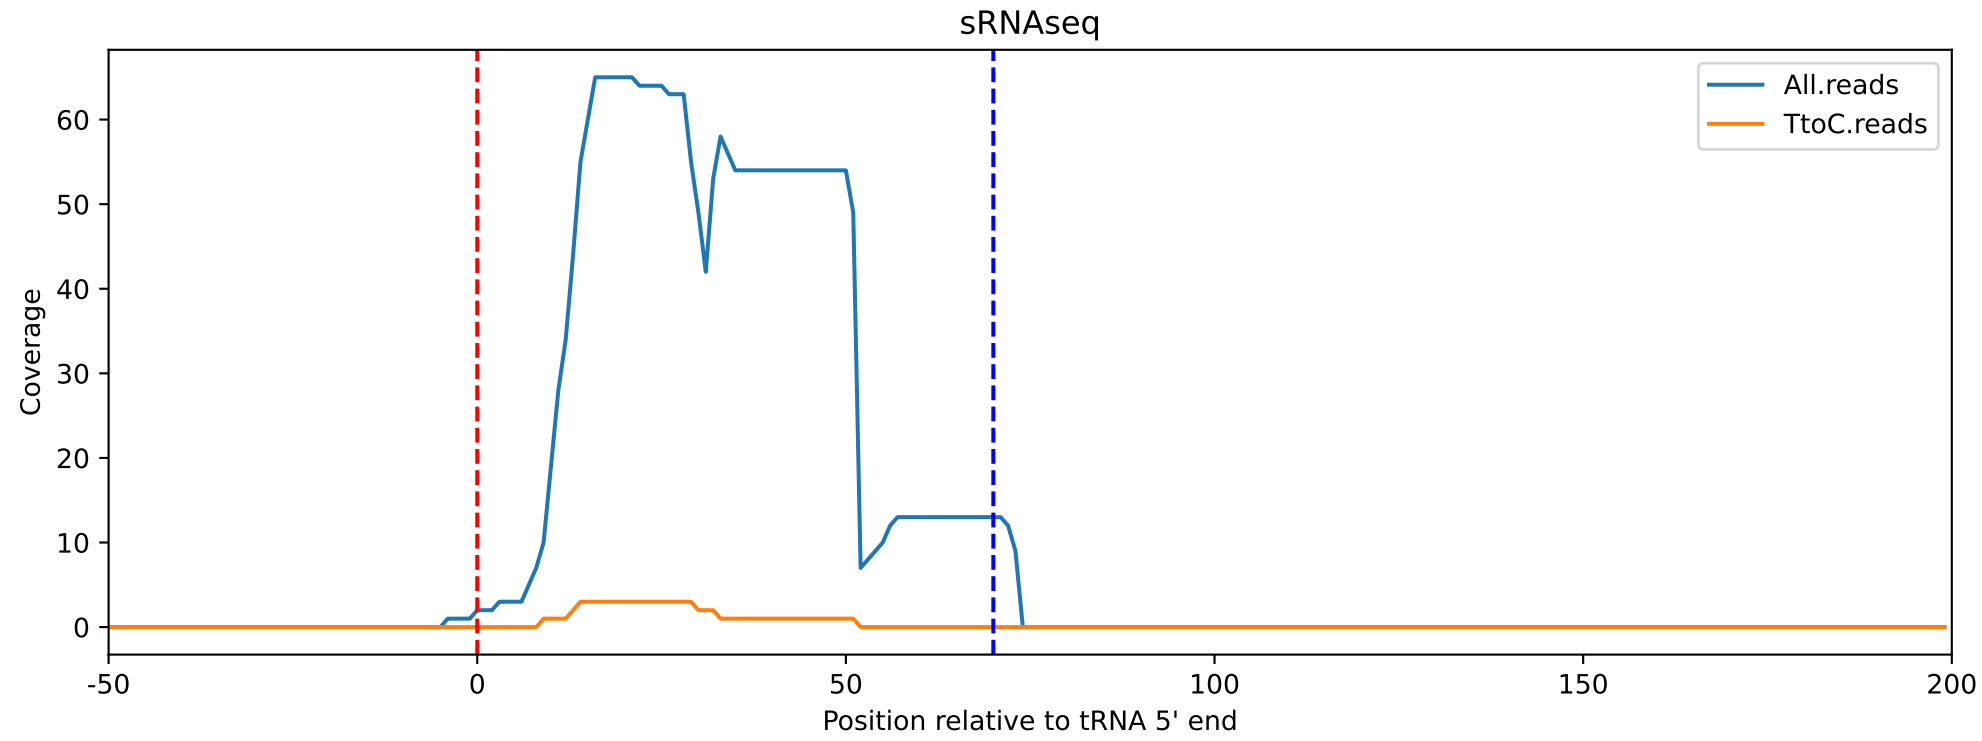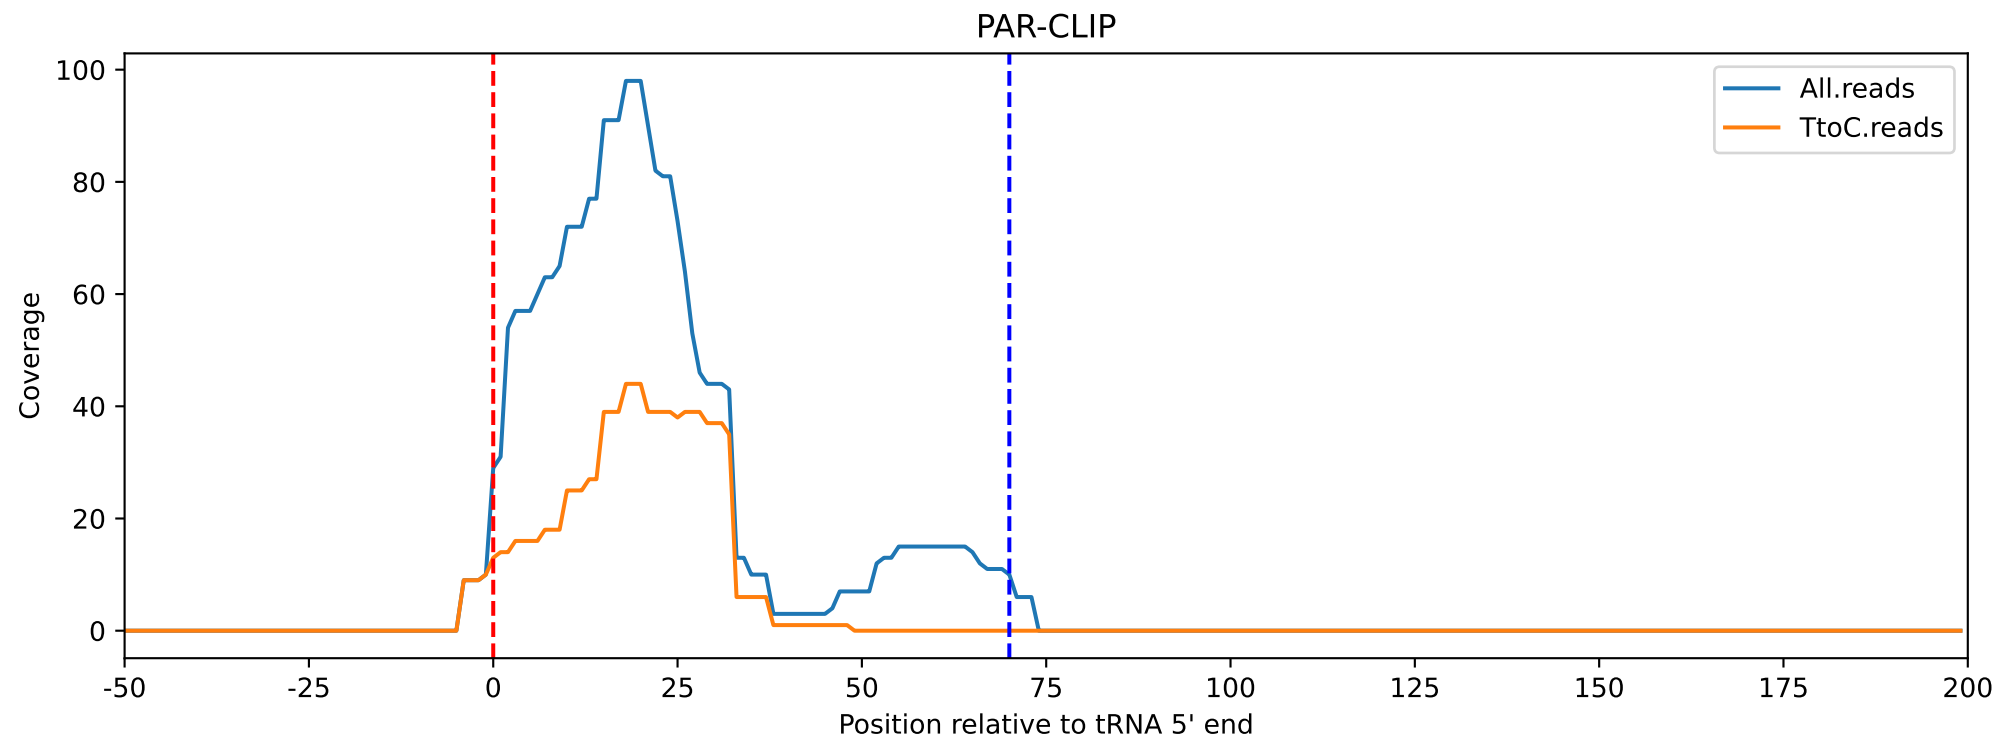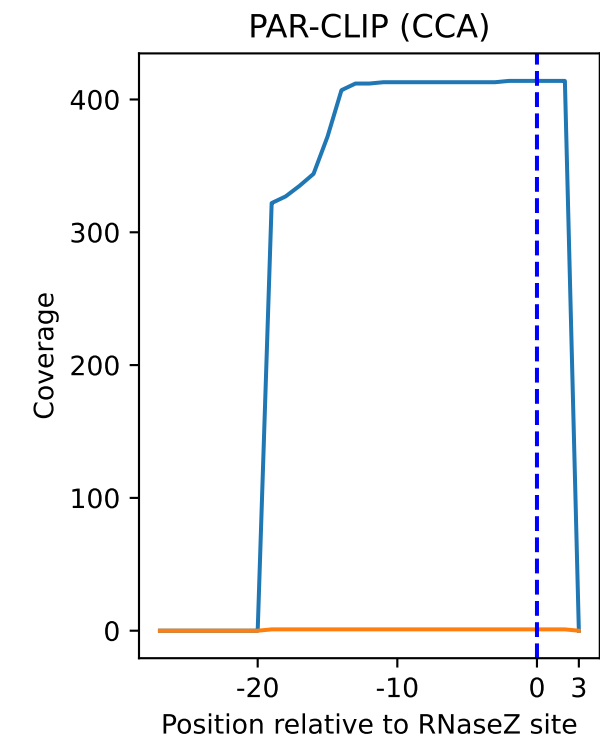



# tRNA-Thr-CGT-1-2

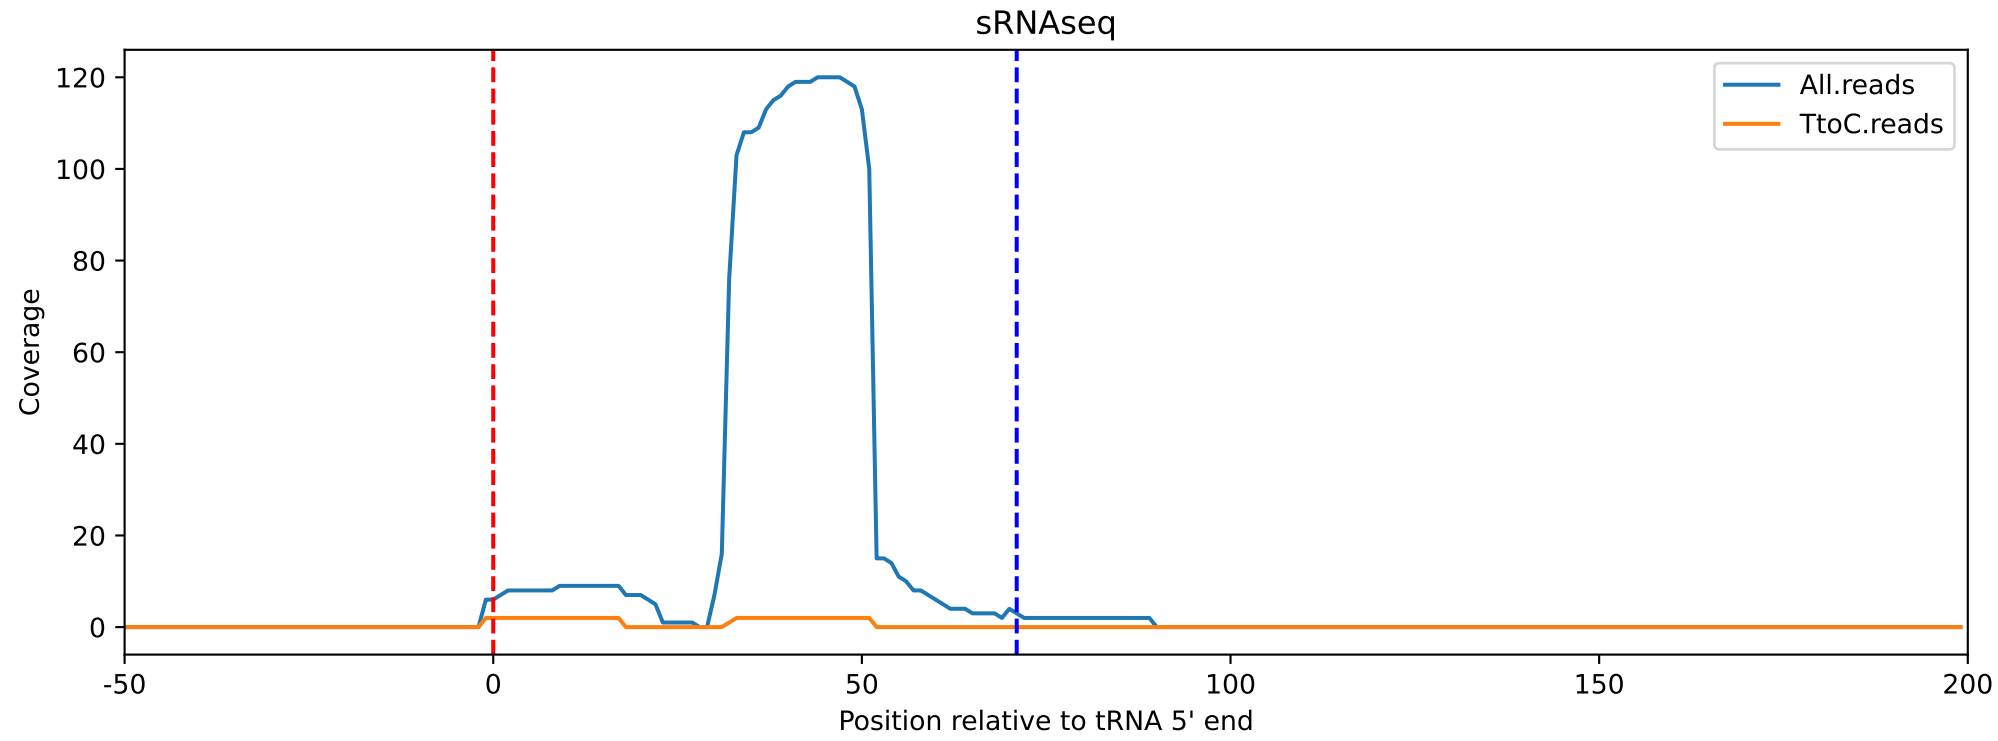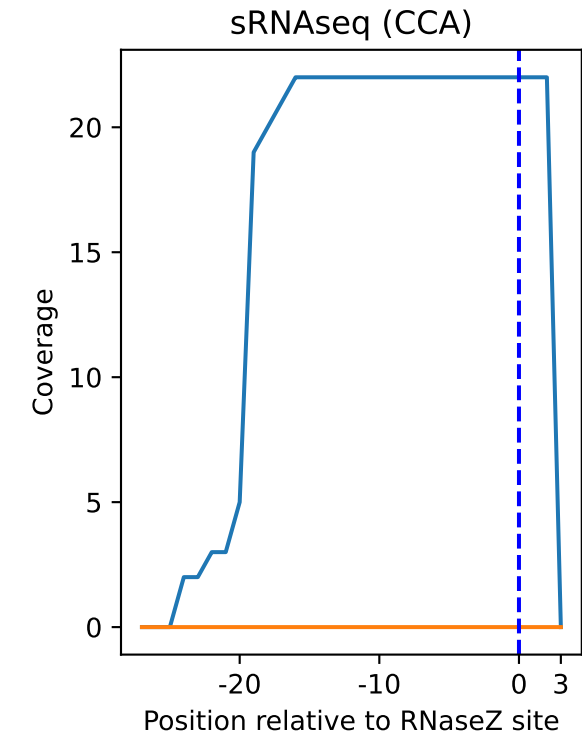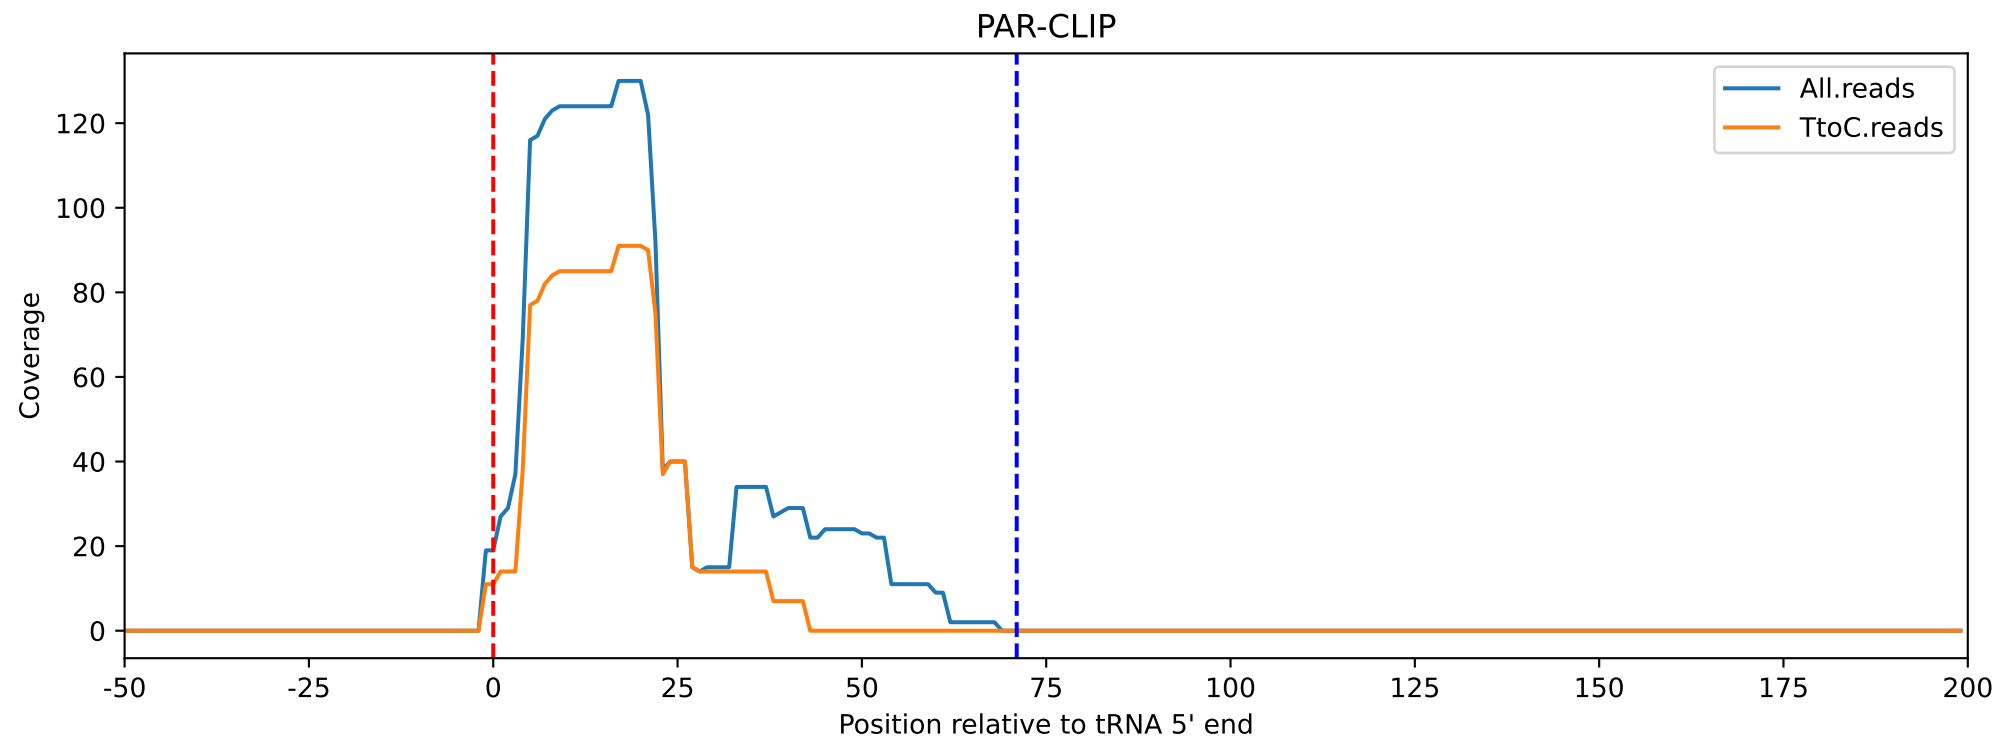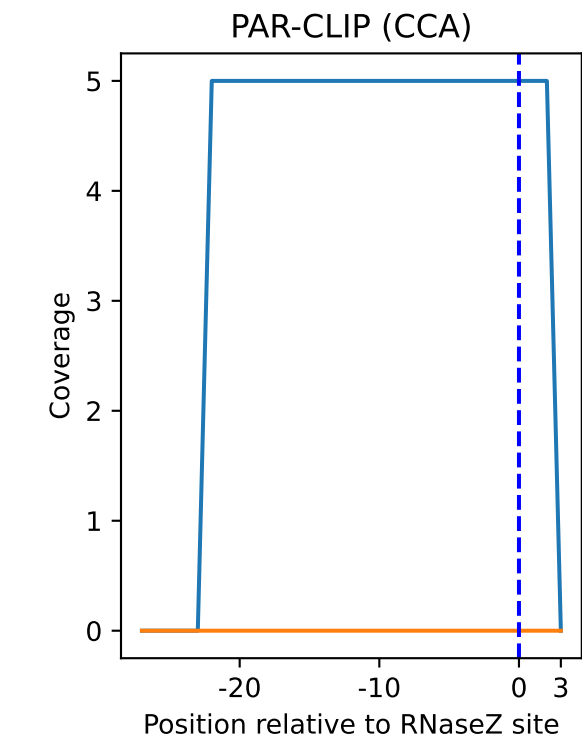

# tRNA-Asp-GTC-2-1

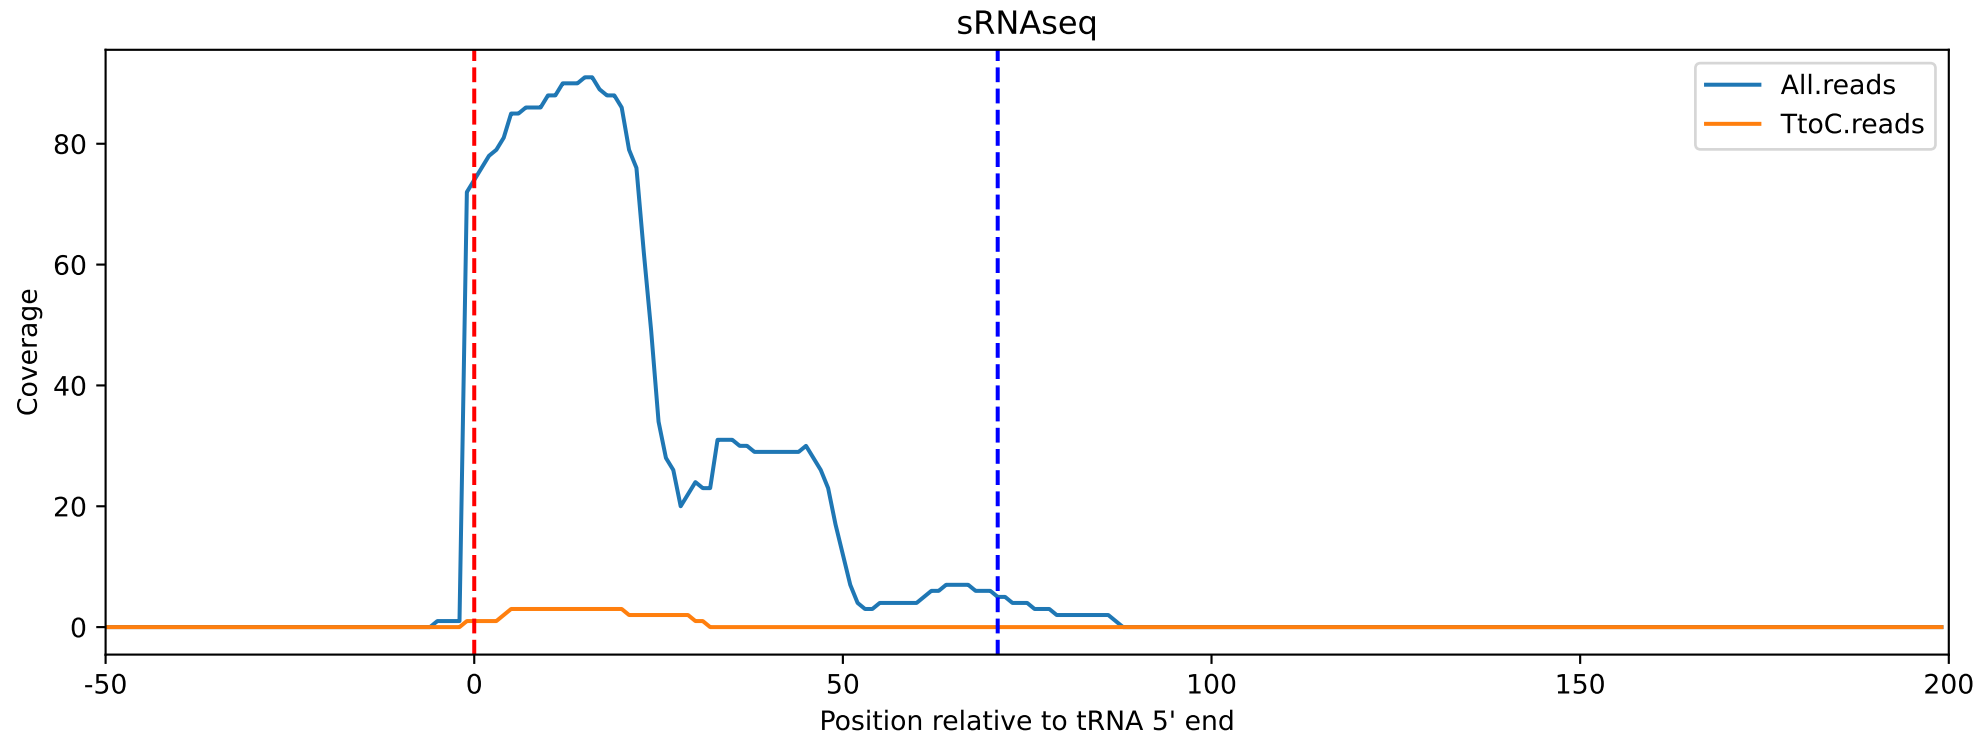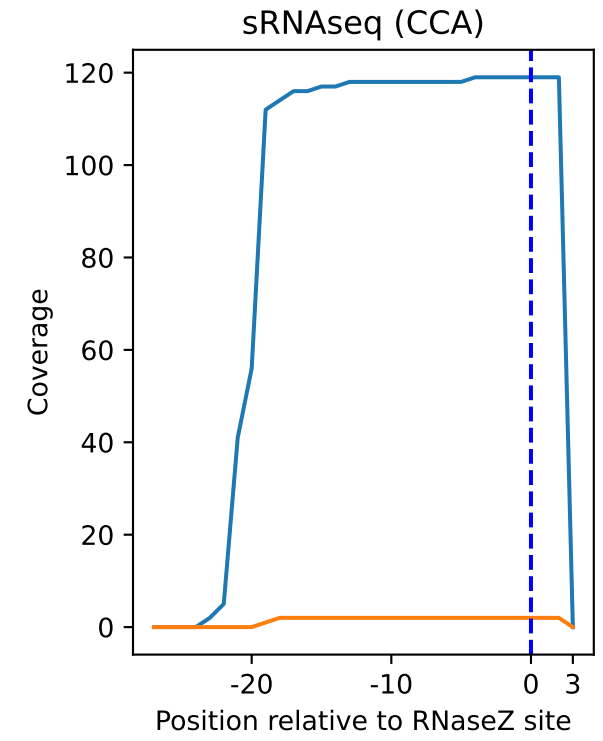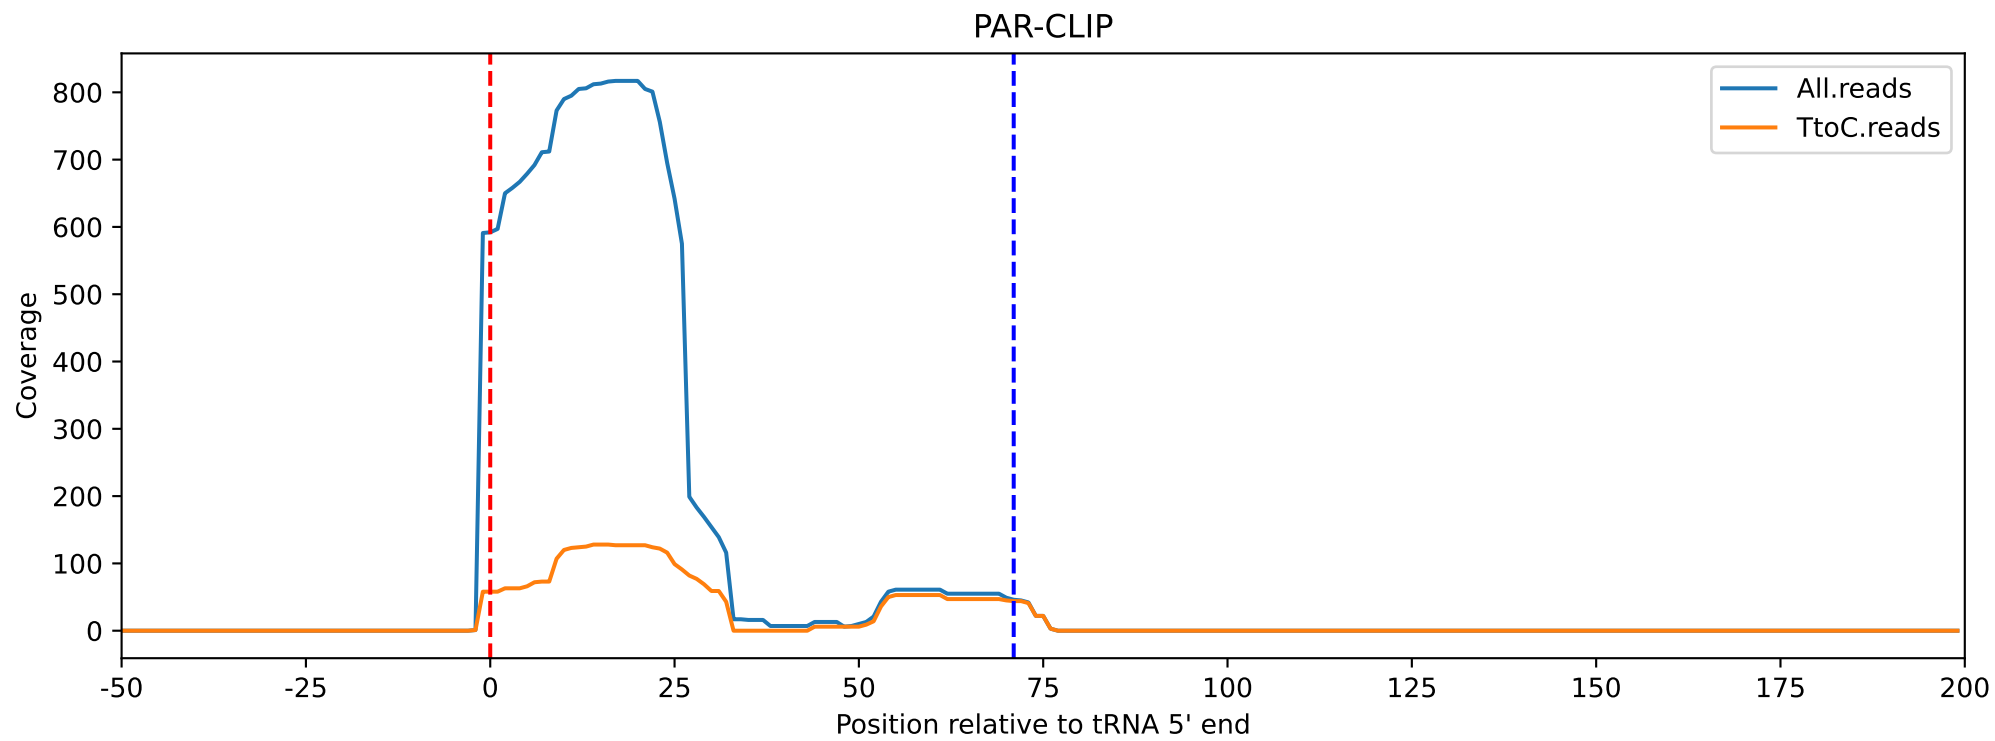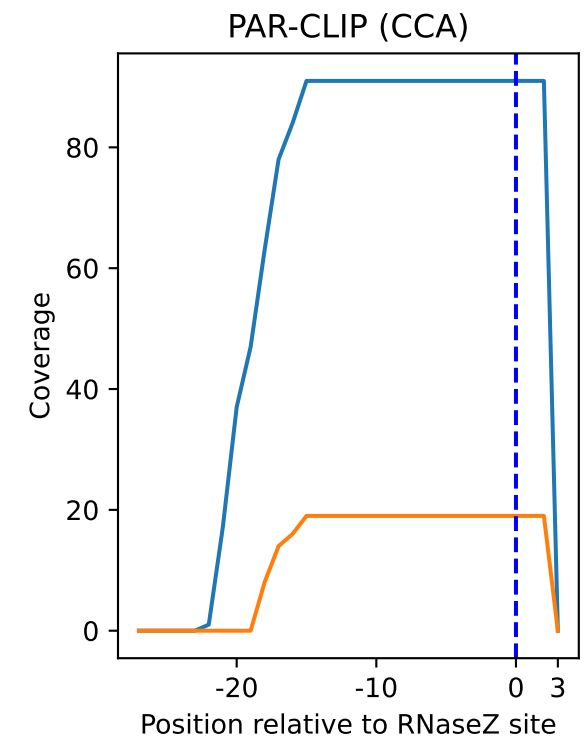

# tRNA-Gly-GCC-2-1

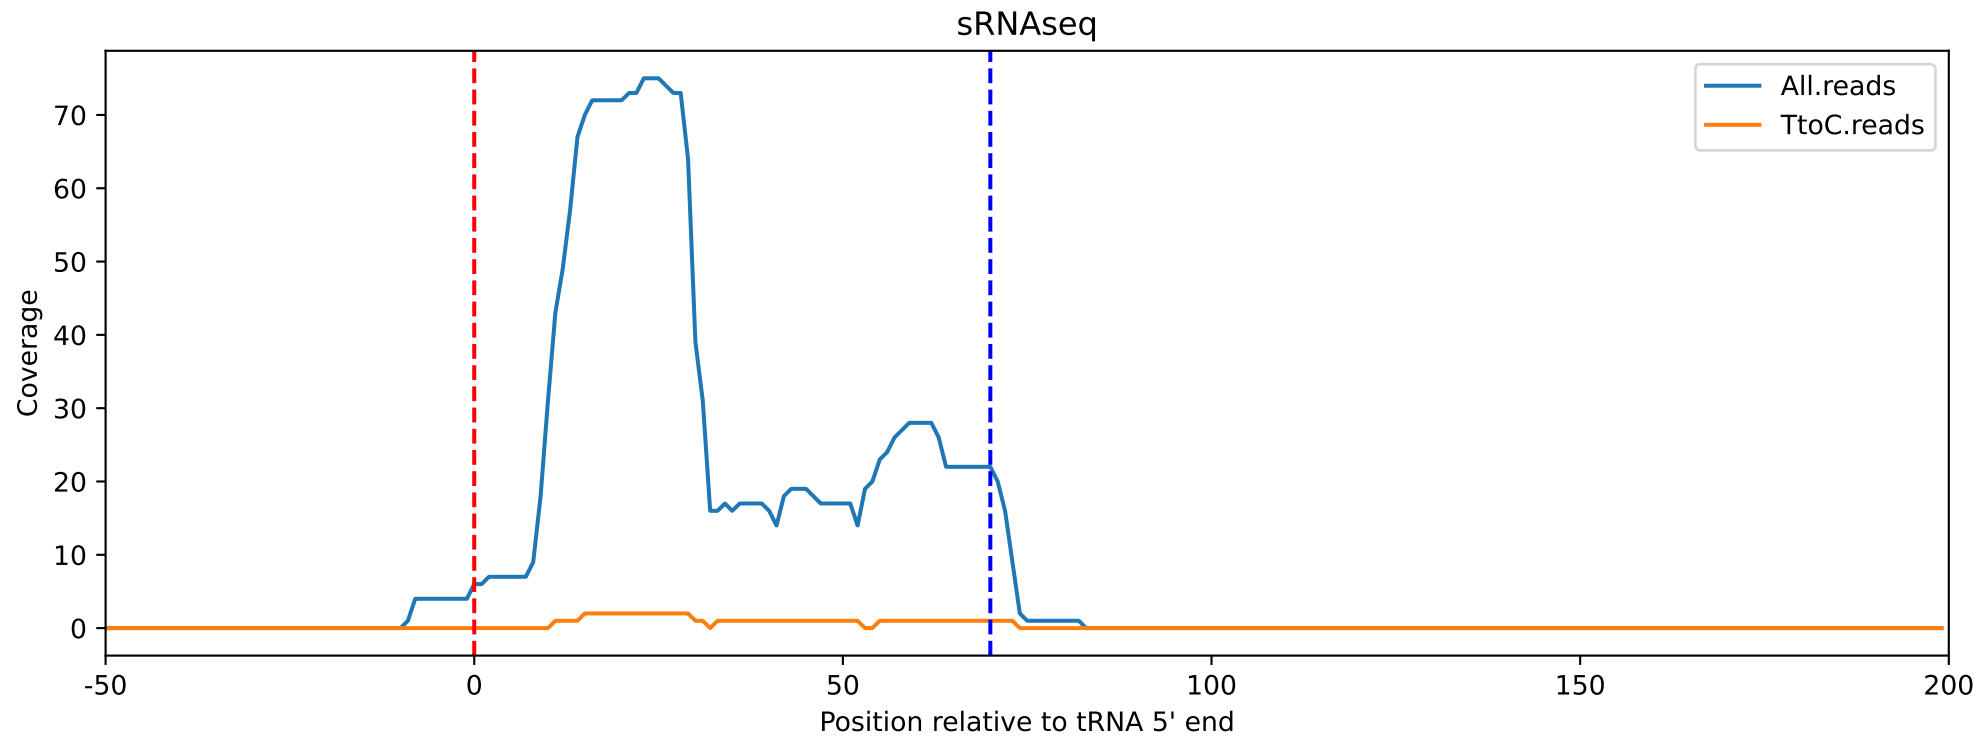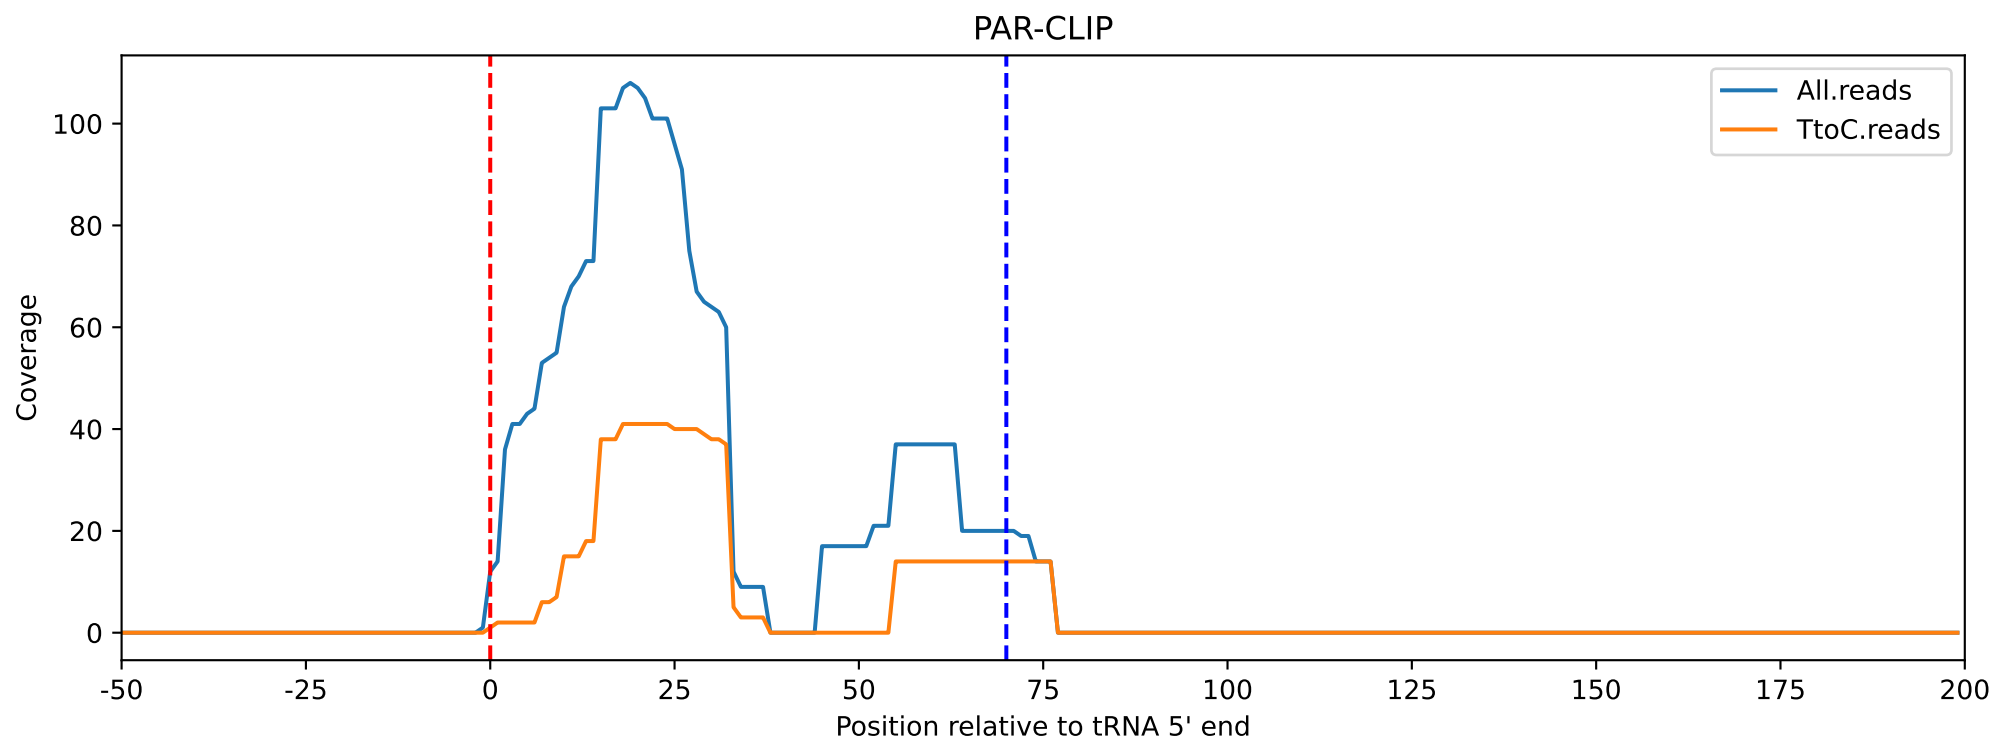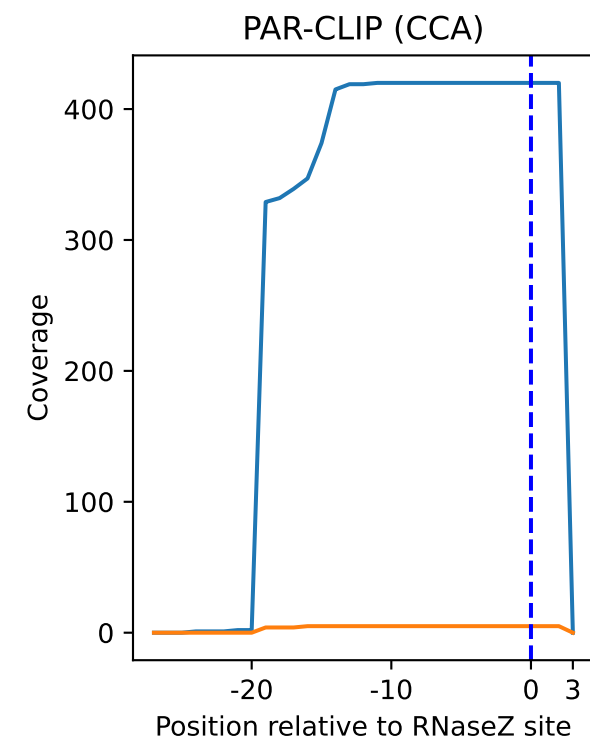

# tRNA-Gly-TCC-1-2

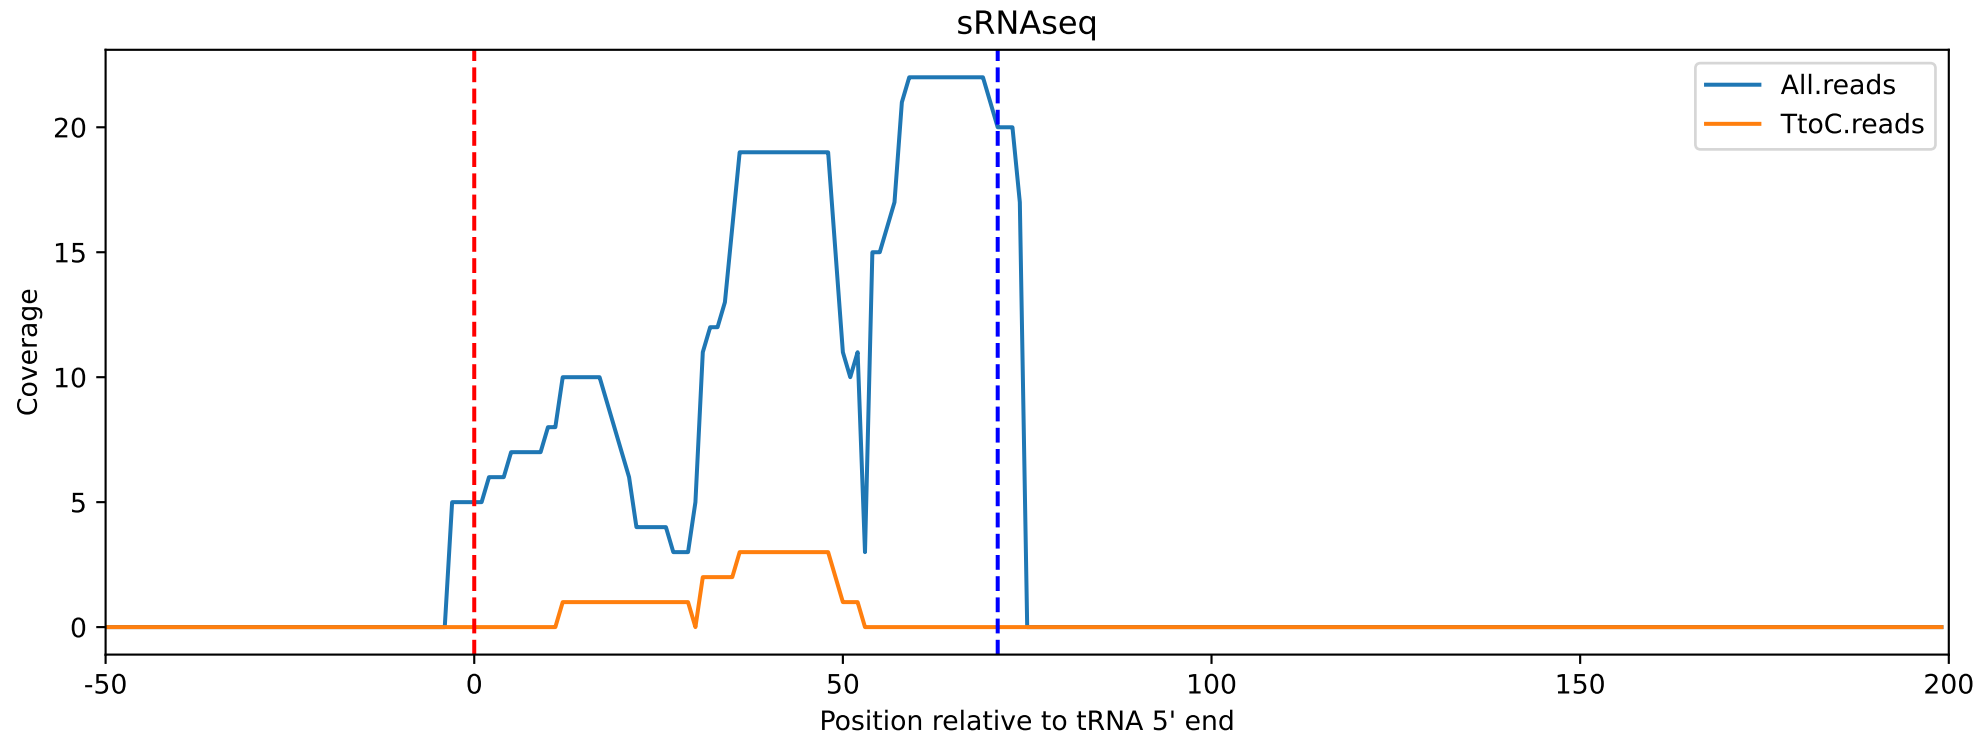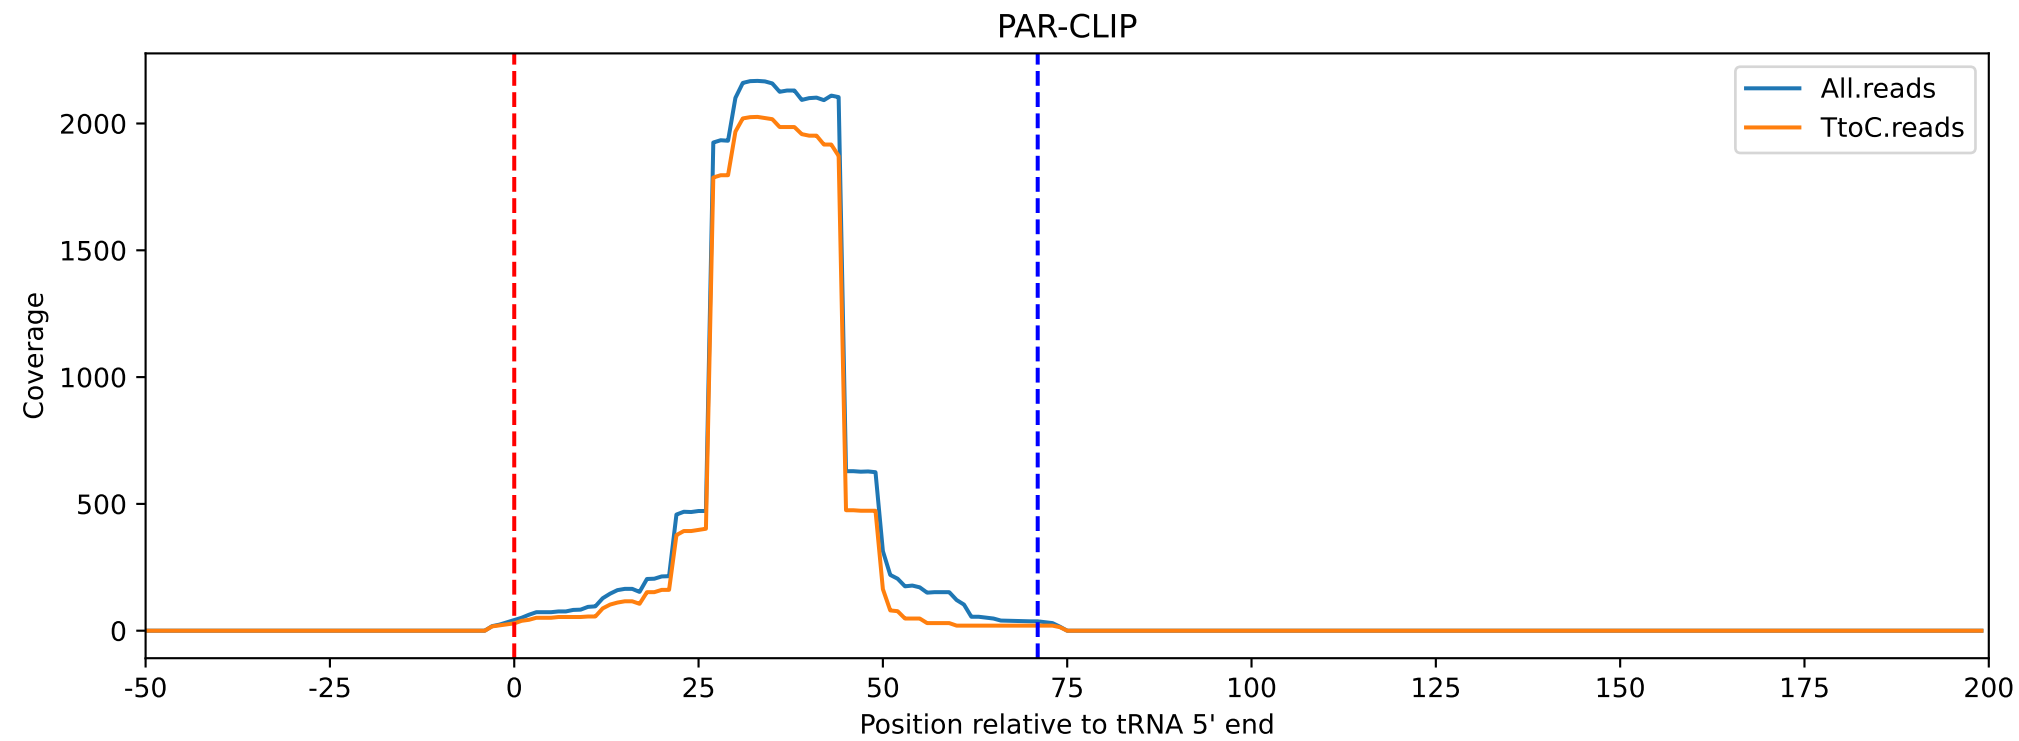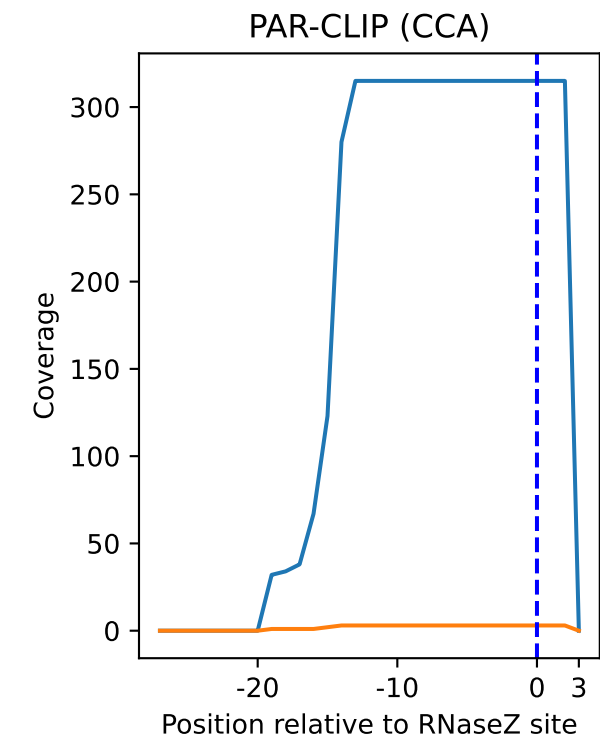

# tRNA-Lys-TTT-2-3

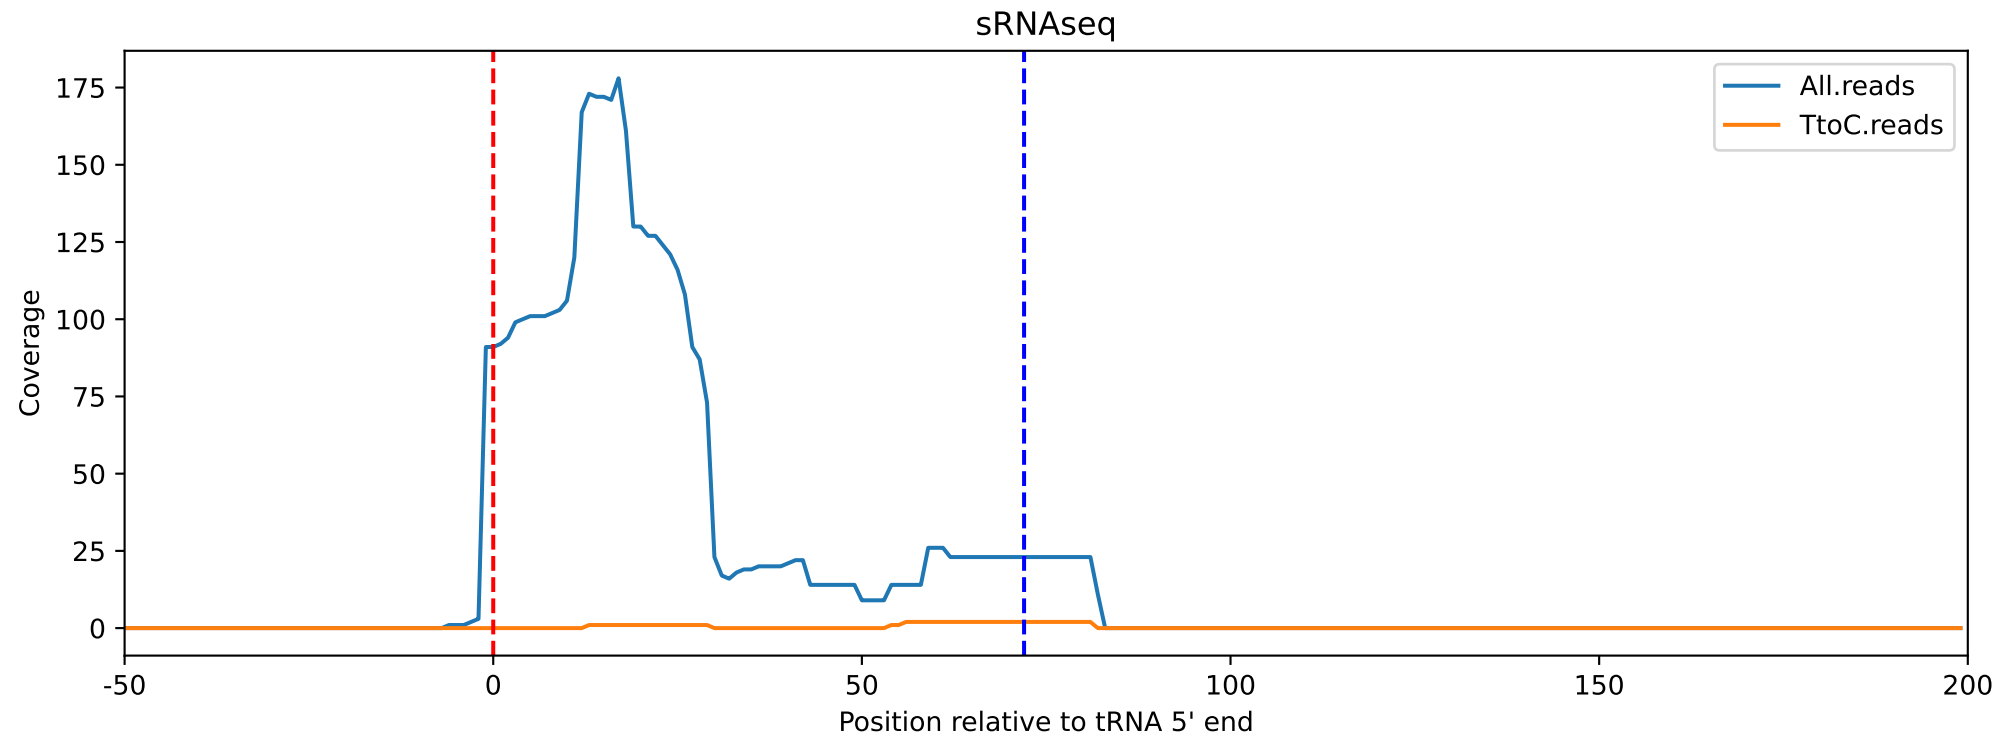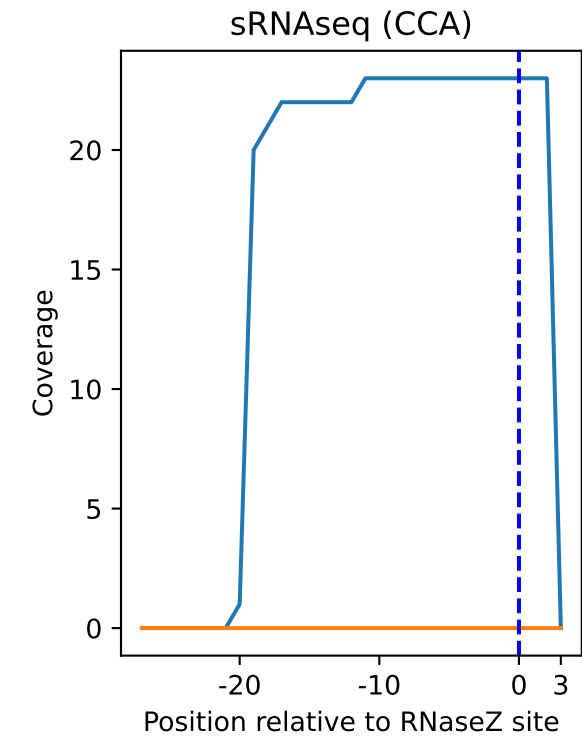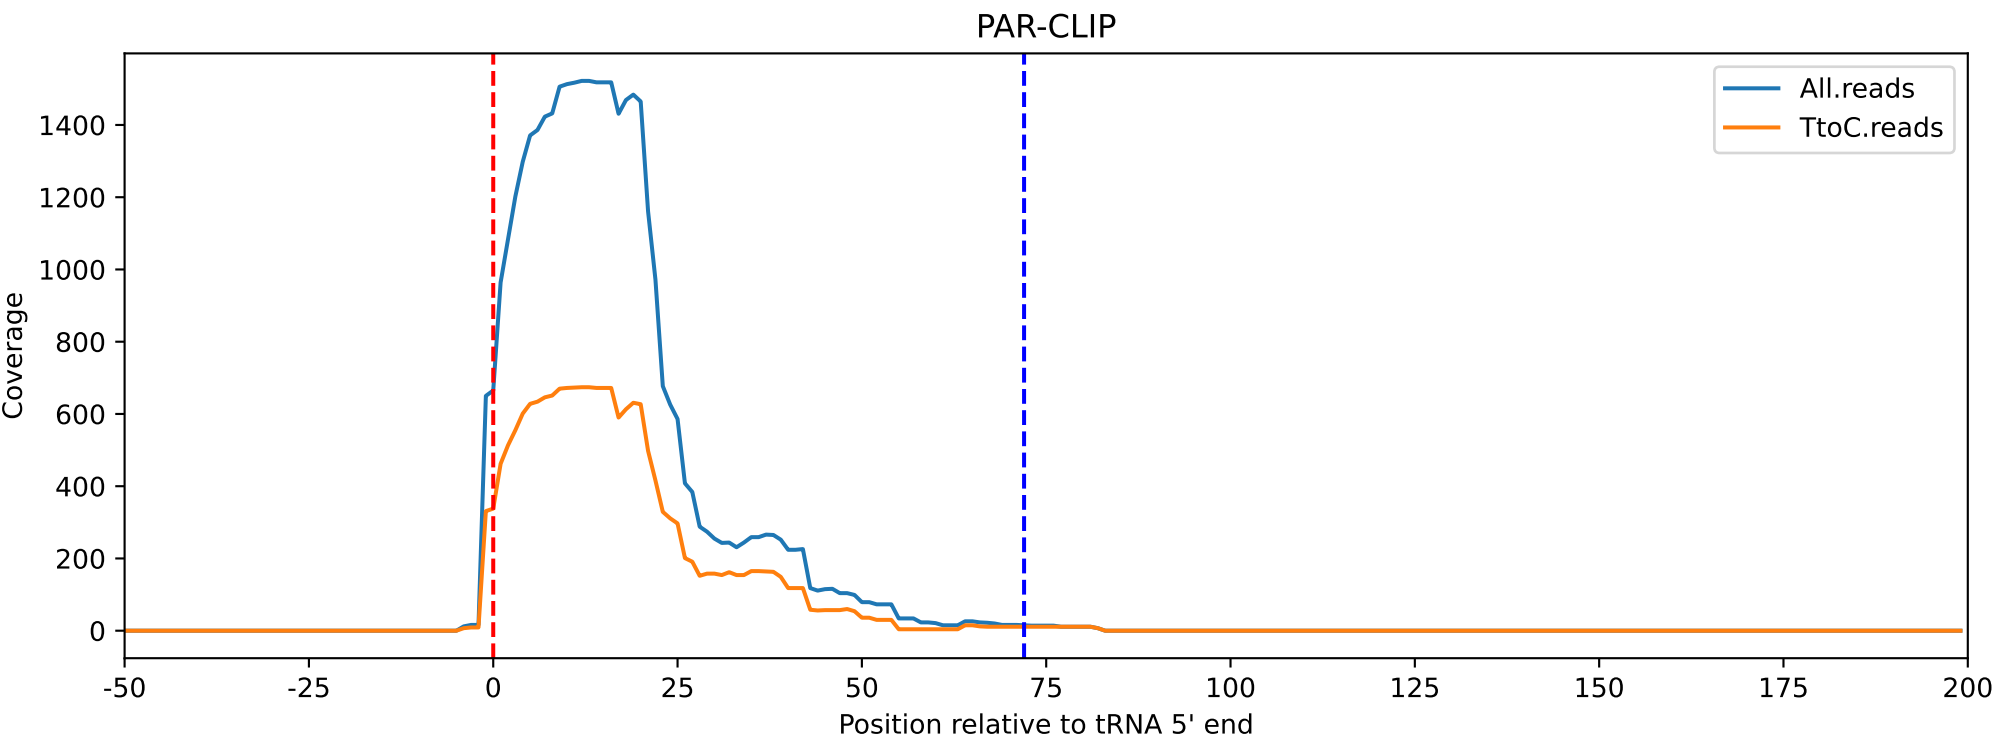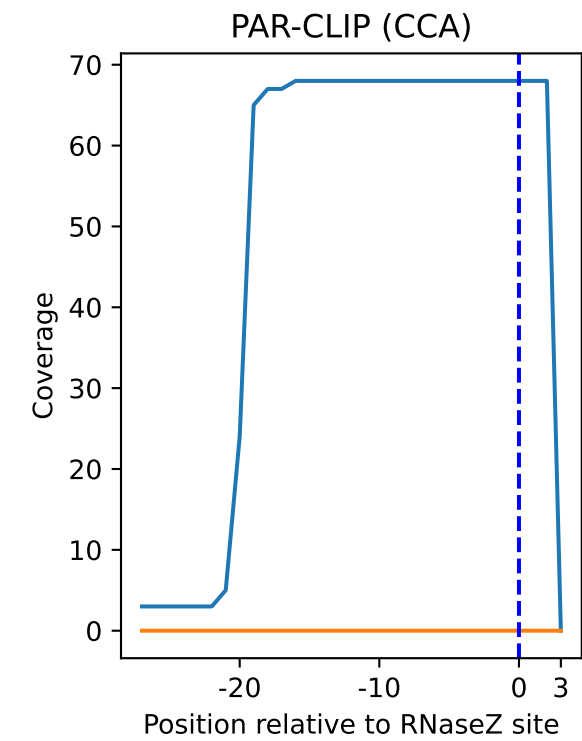

# tRNA-Thr-TGT-2-2

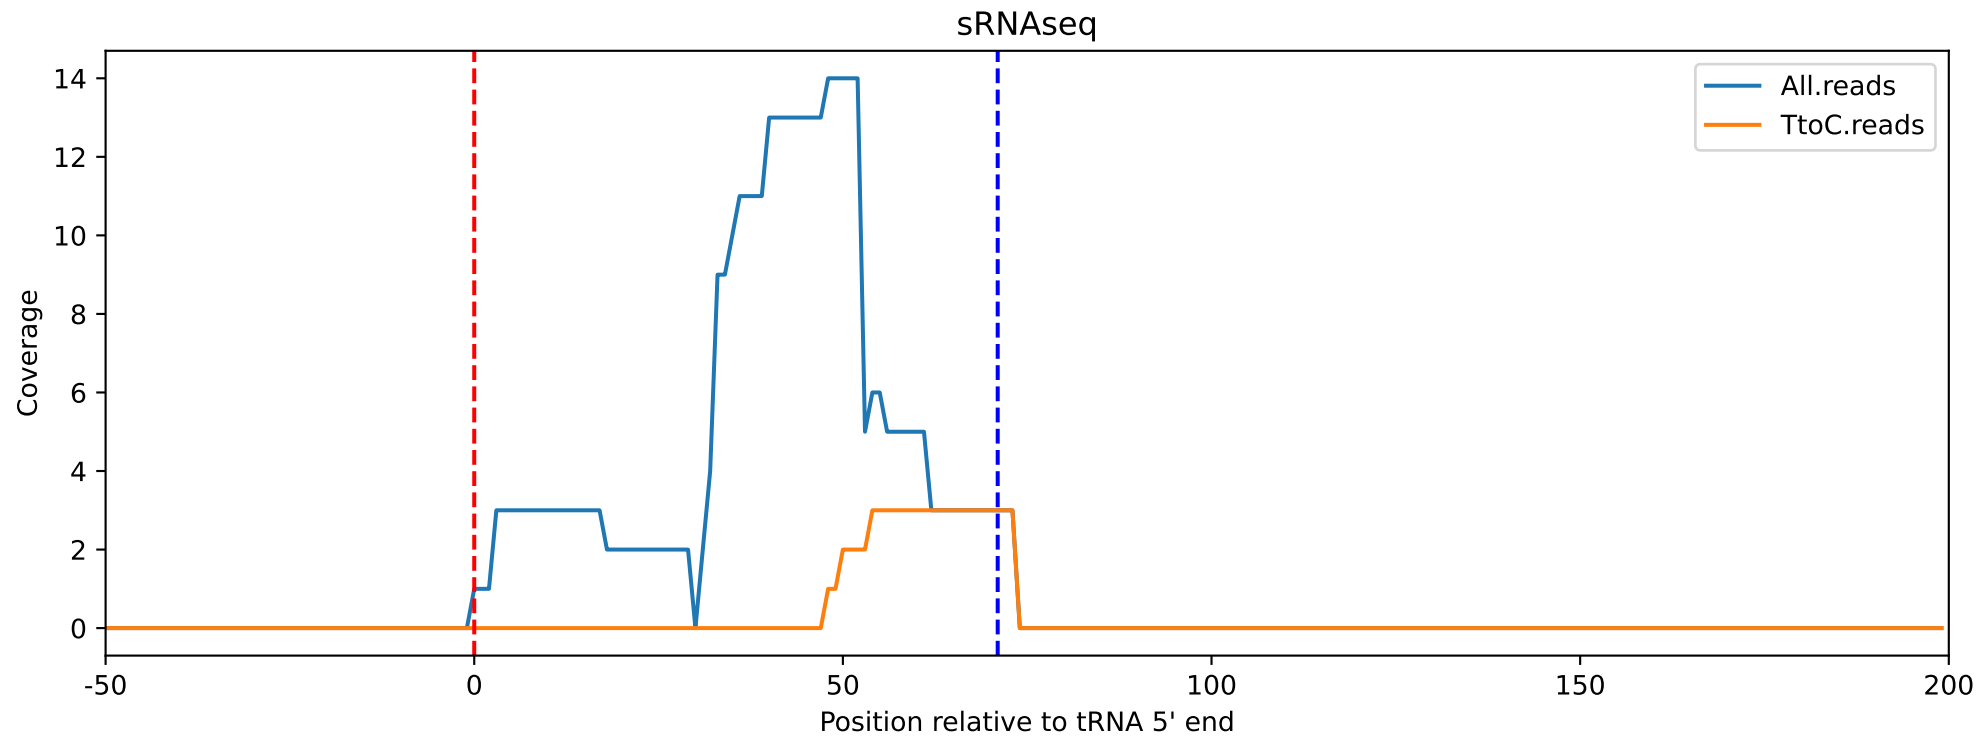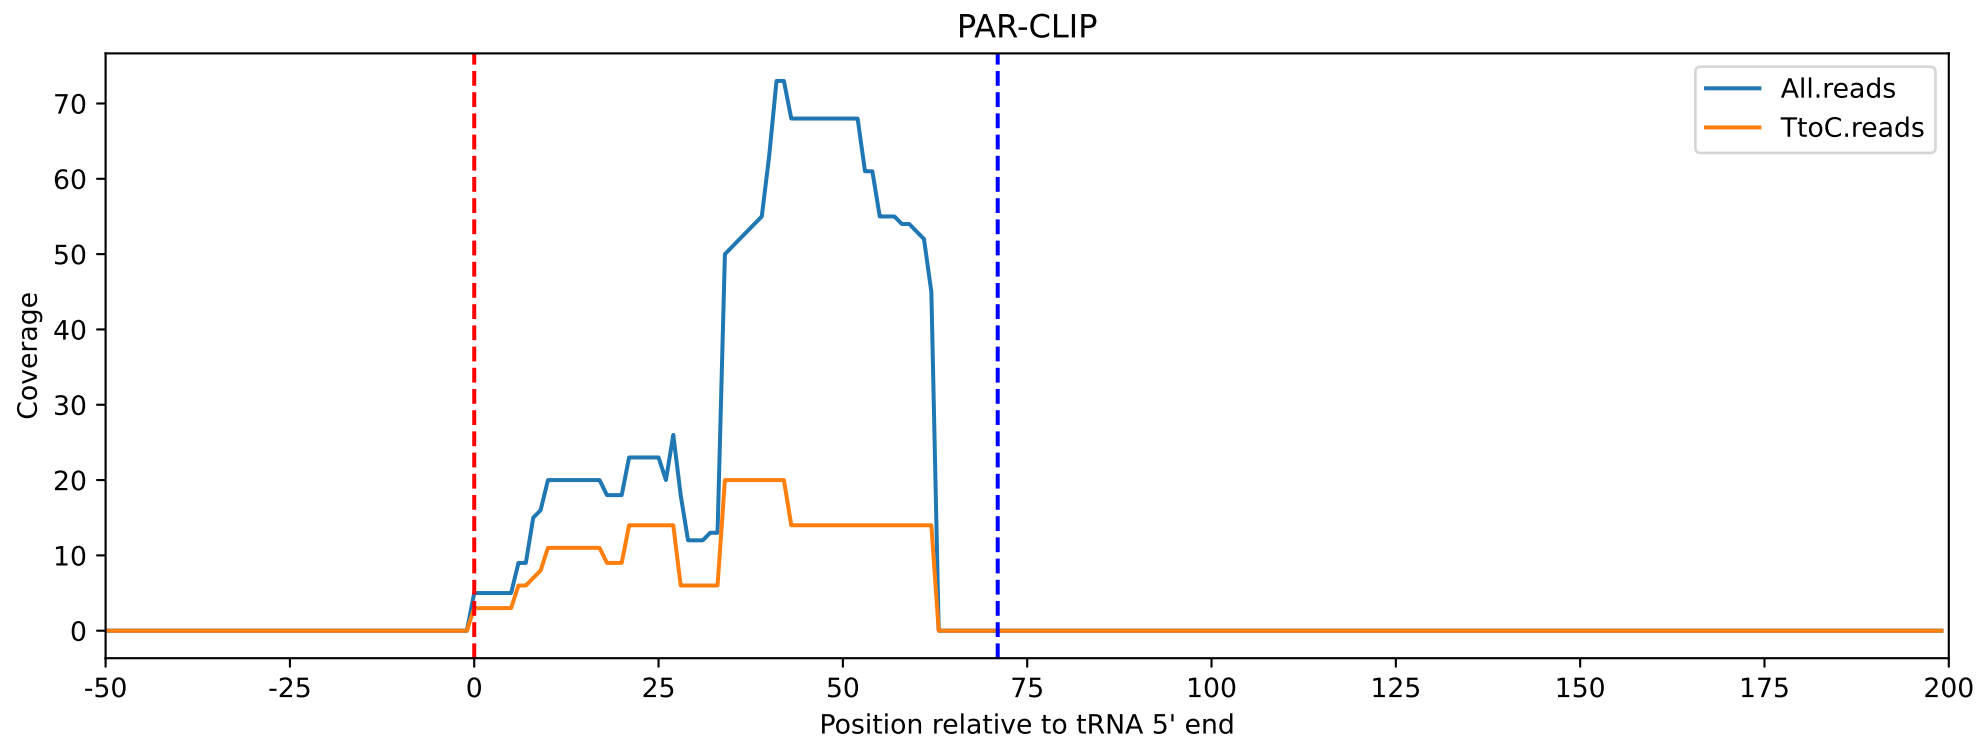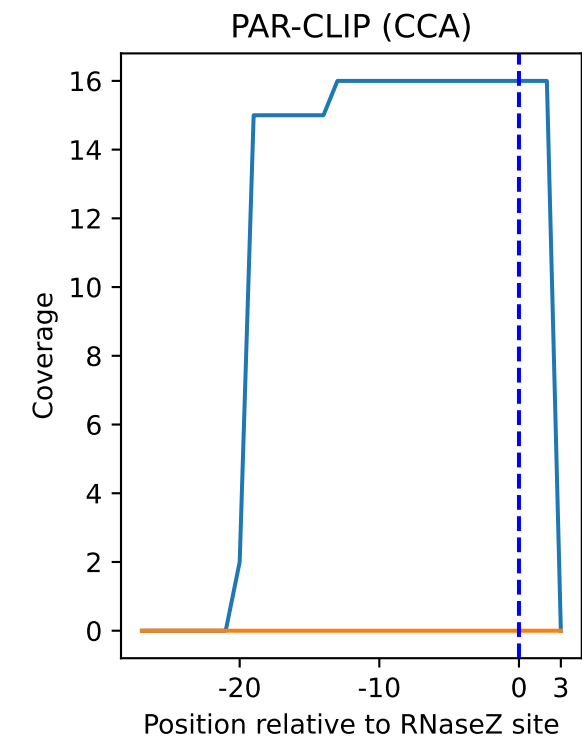

# tRNA-Glu-CTC-3-9

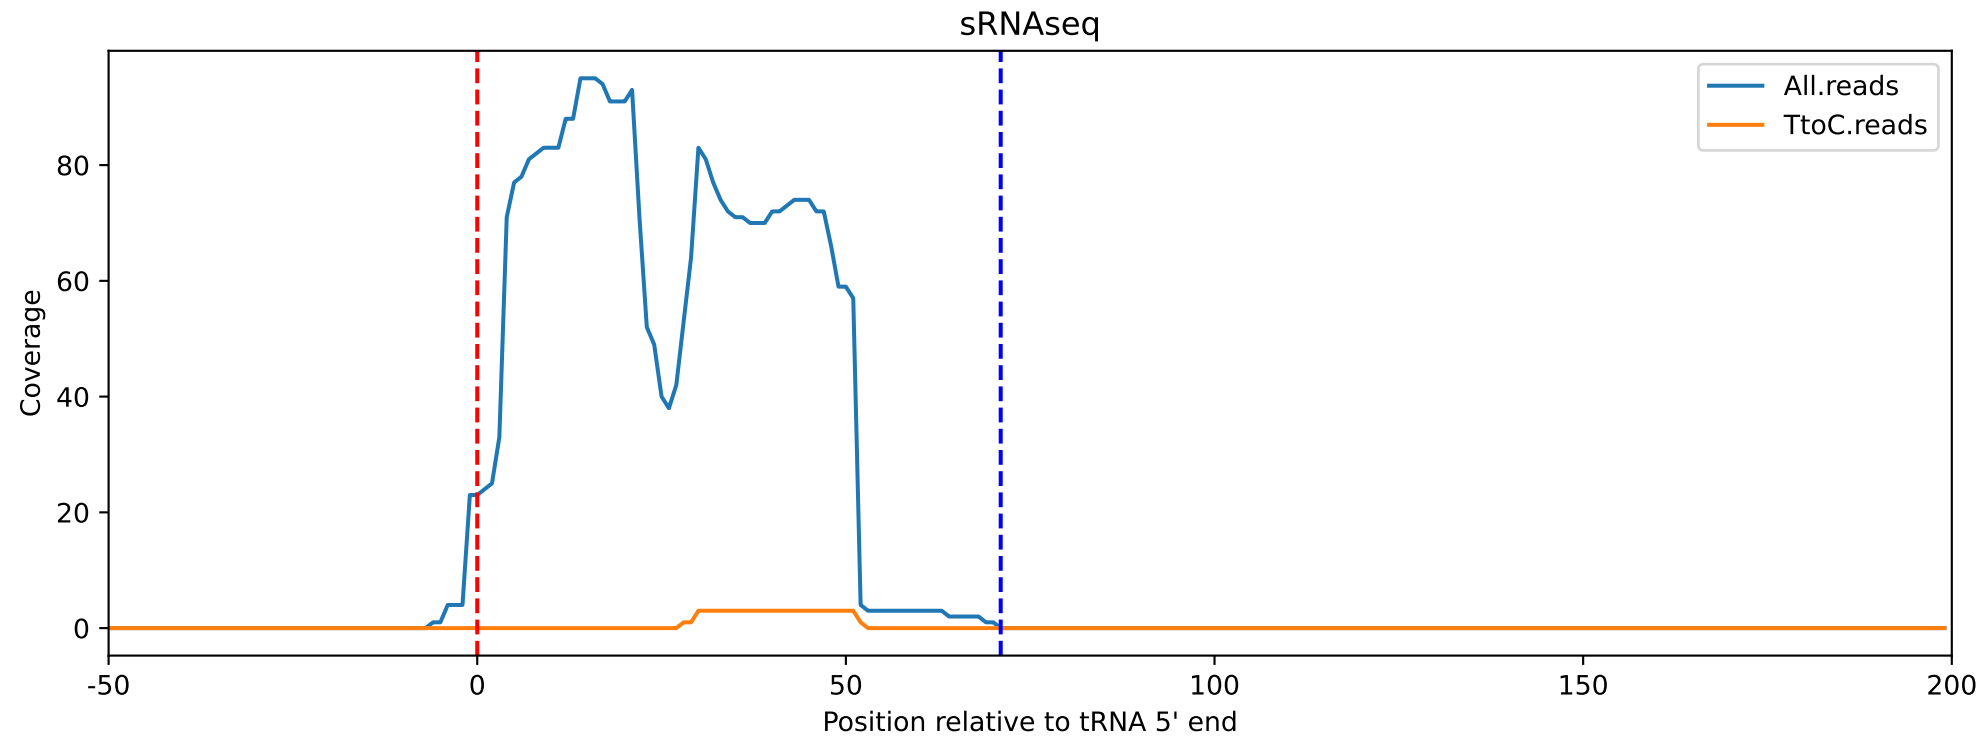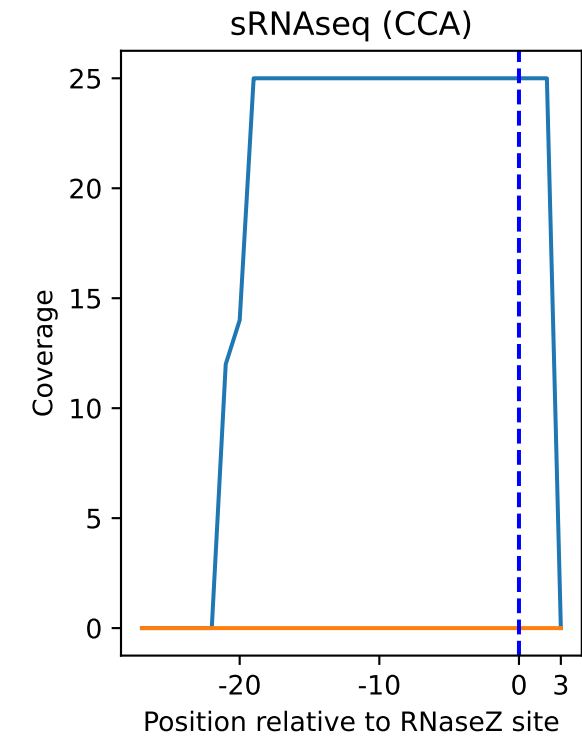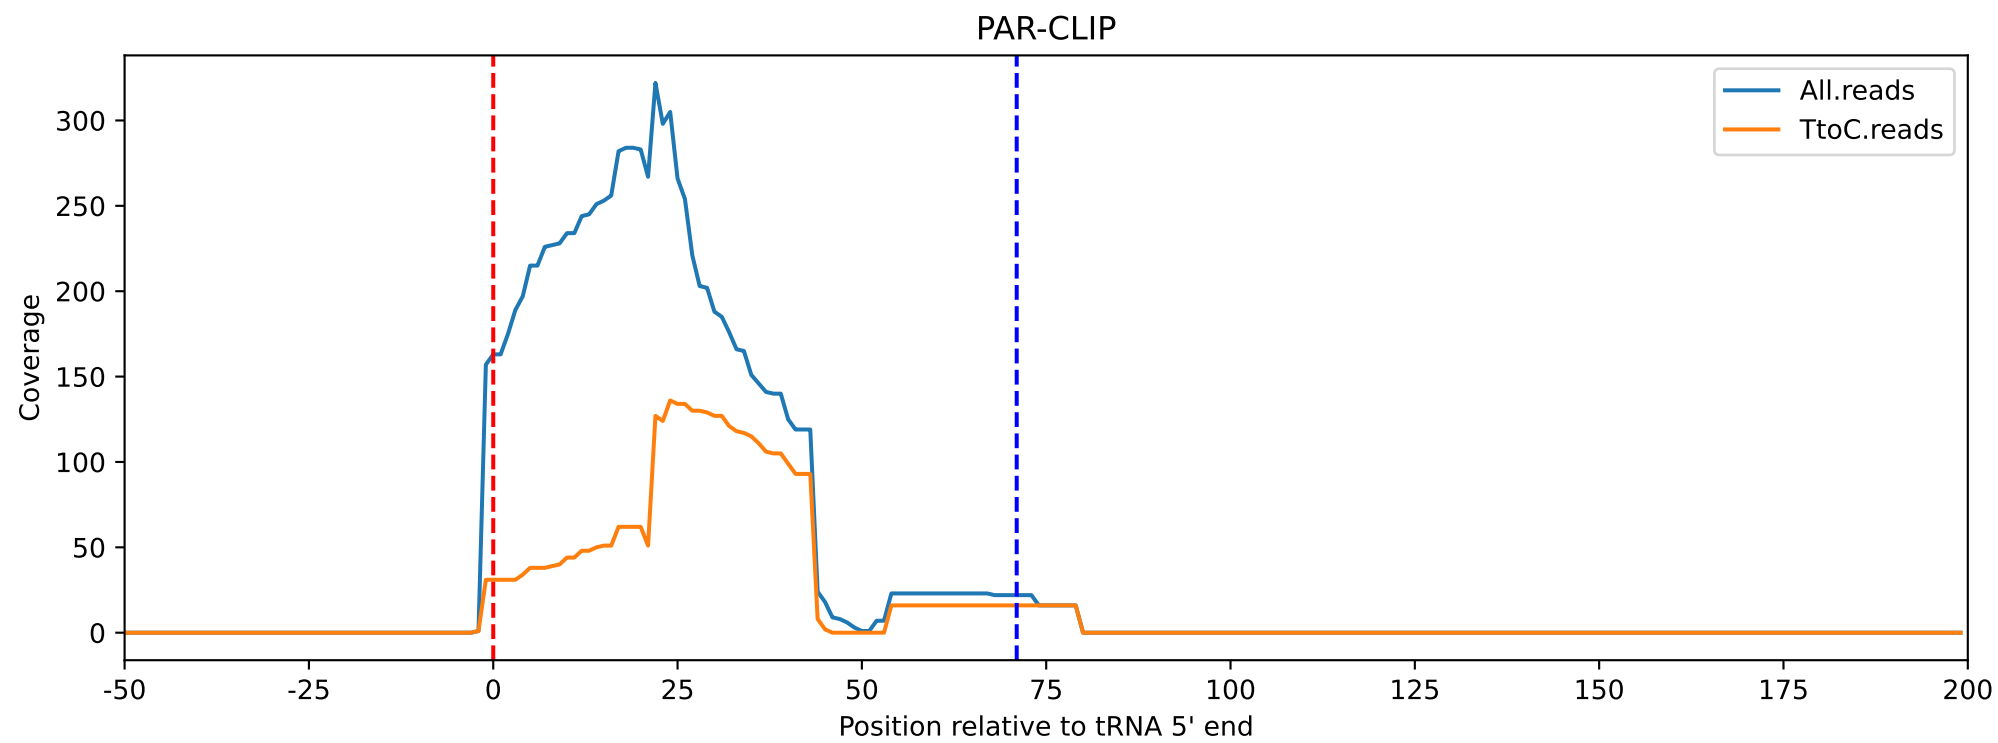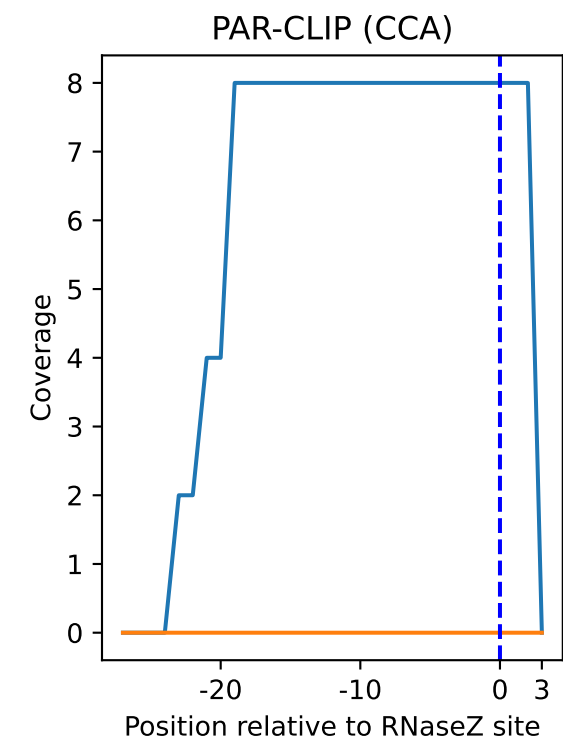

# tRNA-Glu-CTC-3-6

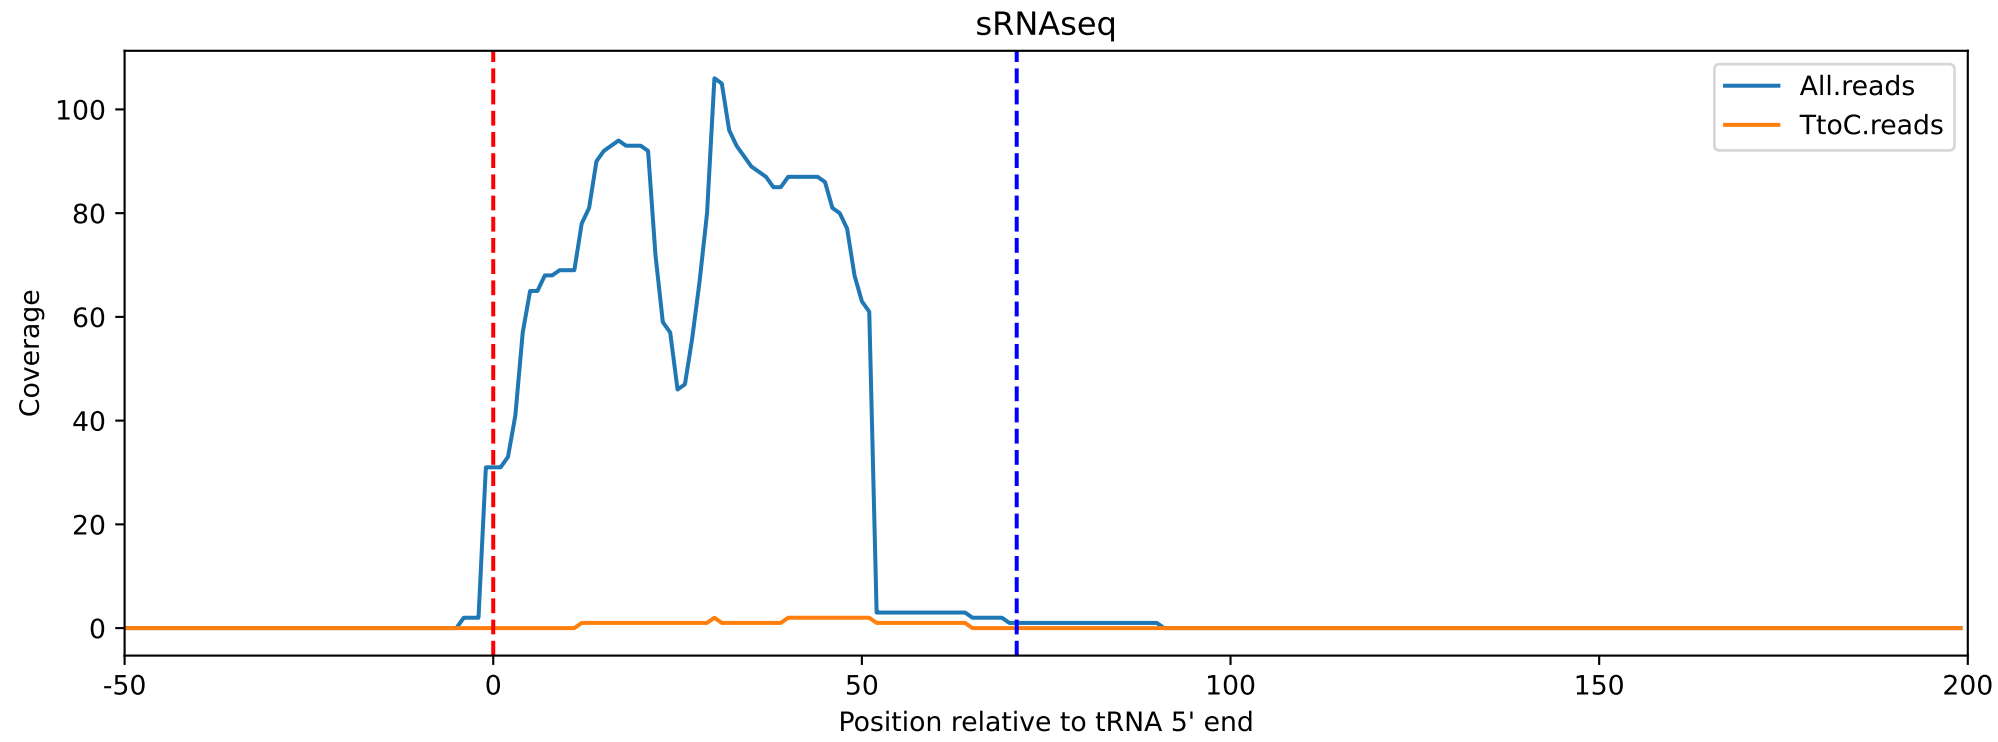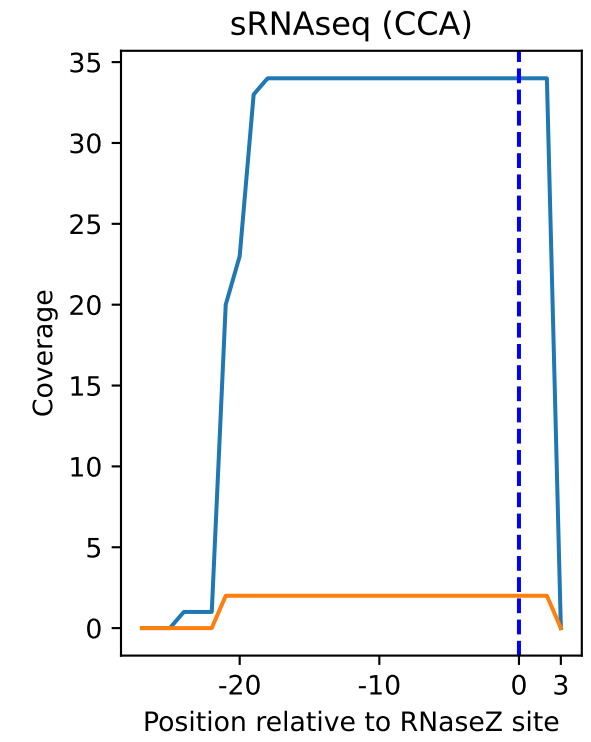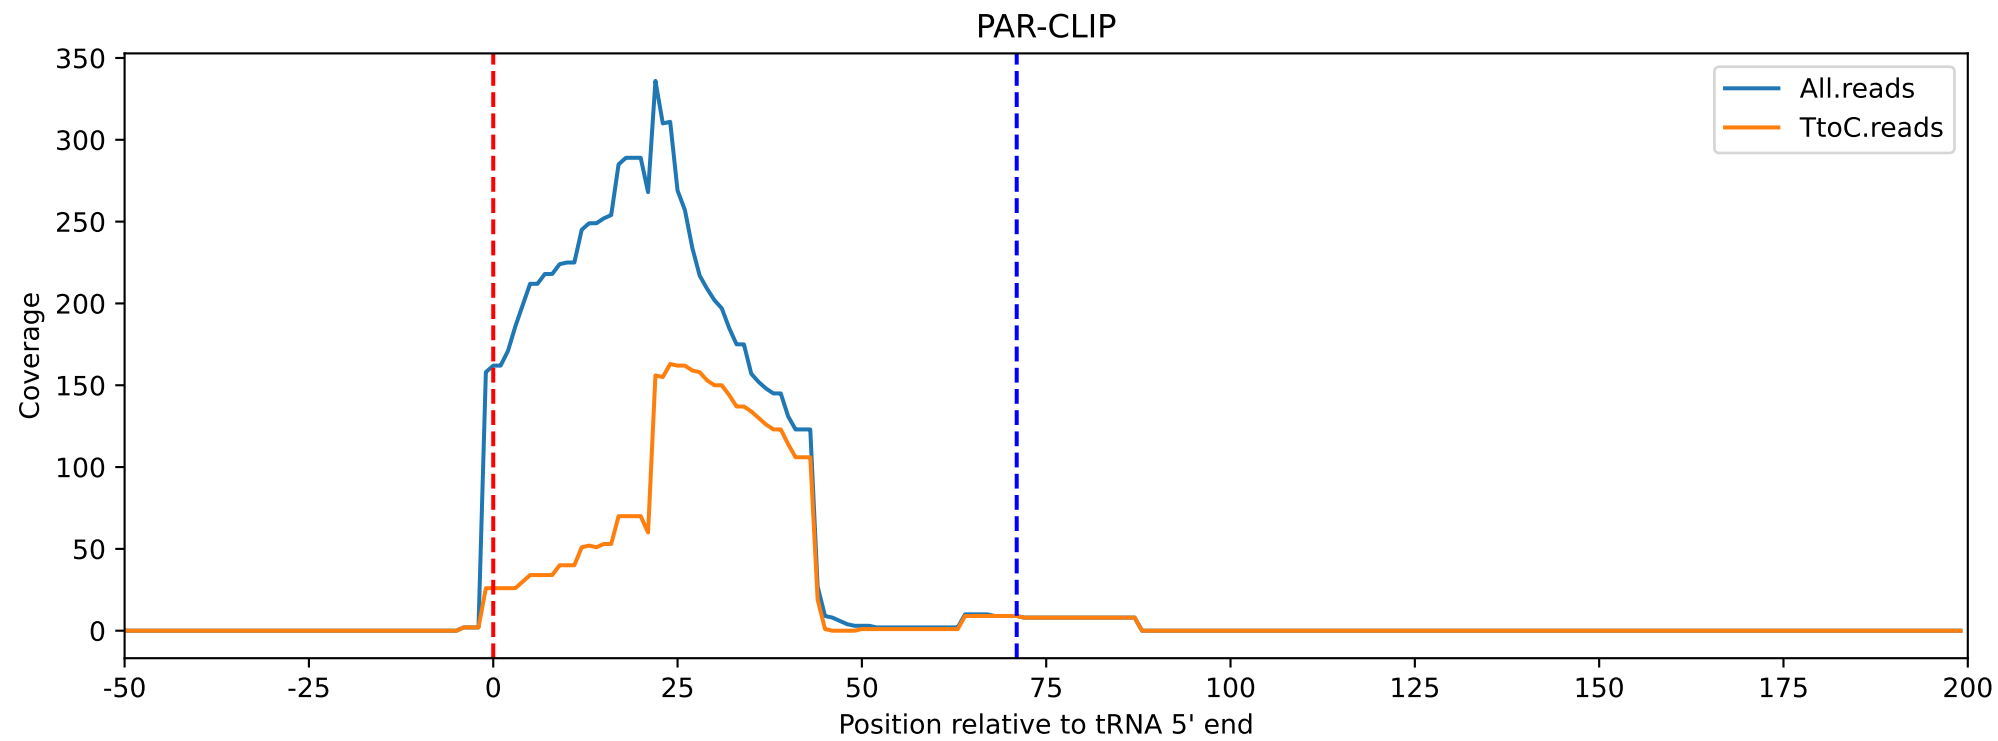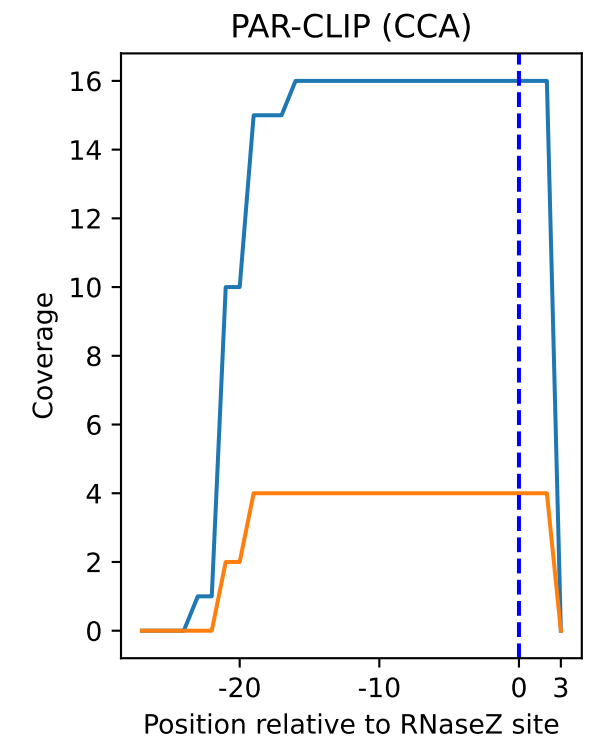



# tRNA-Pro-AGG-1-4

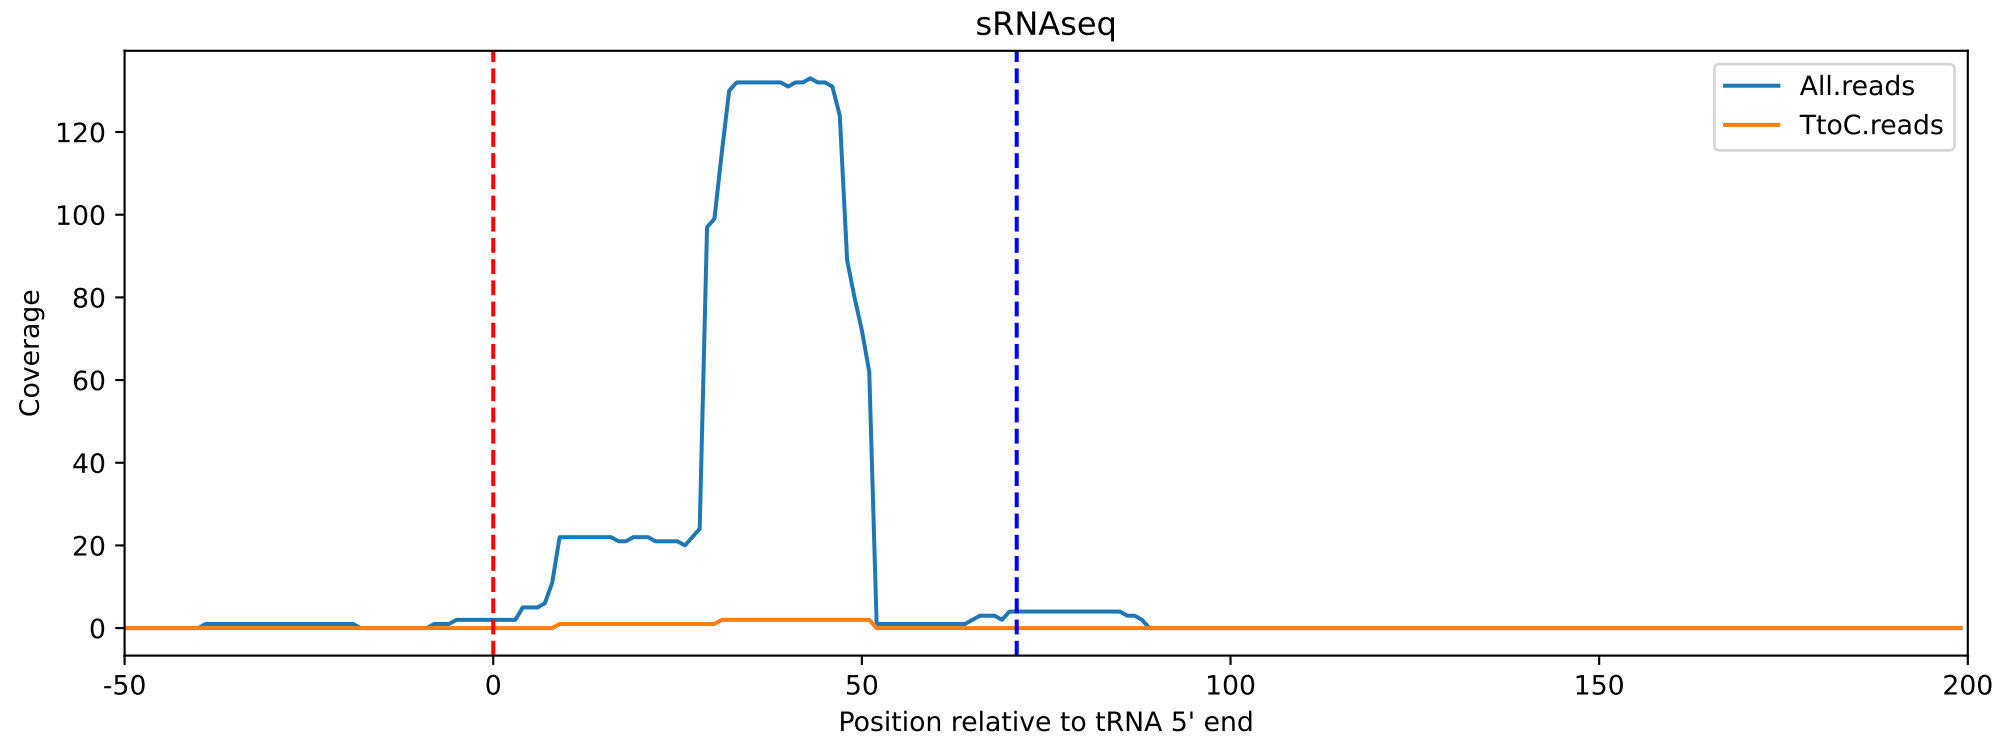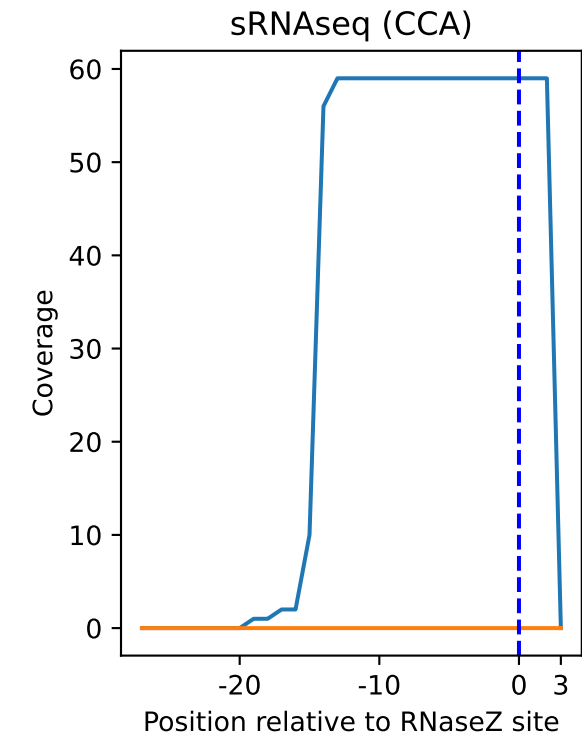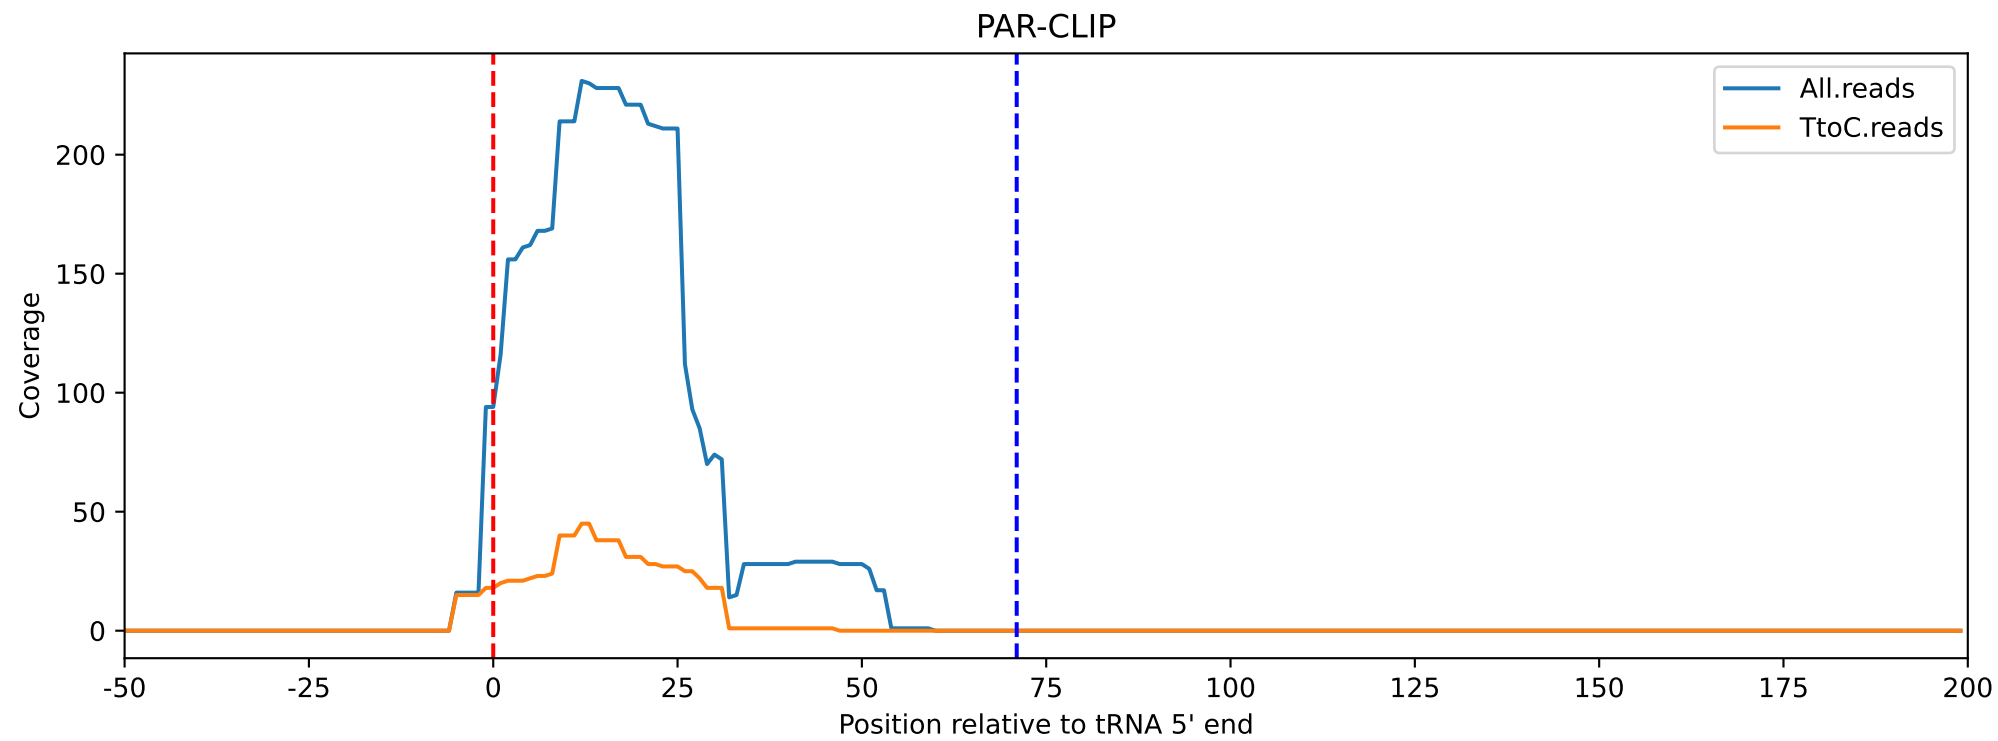

# tRNA-Phe-GAA-1-4

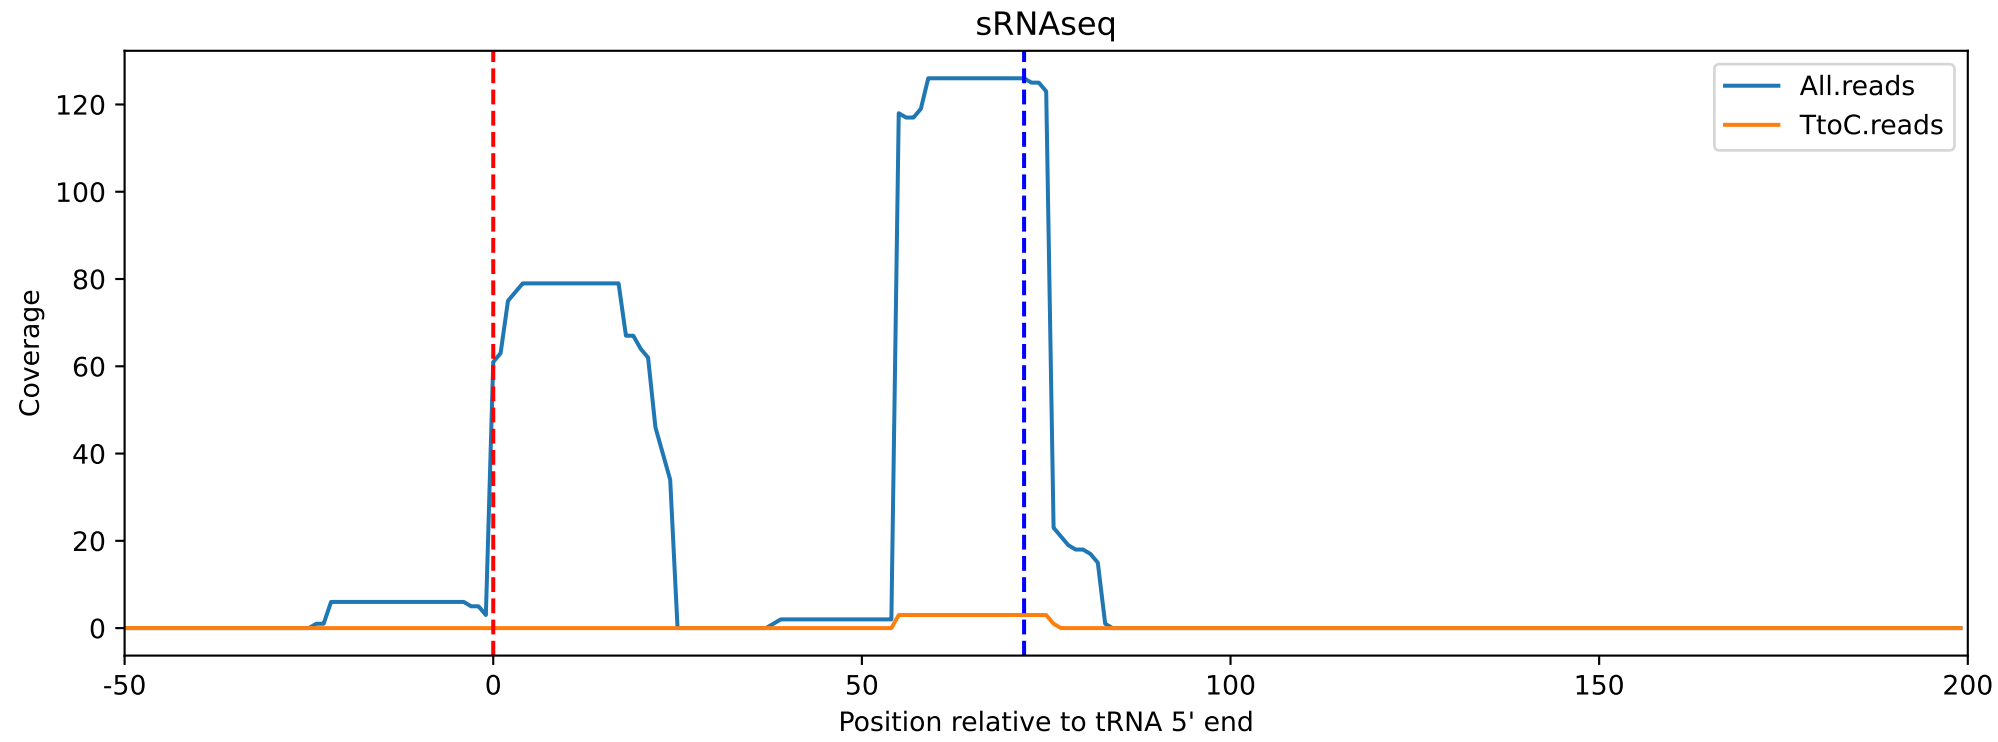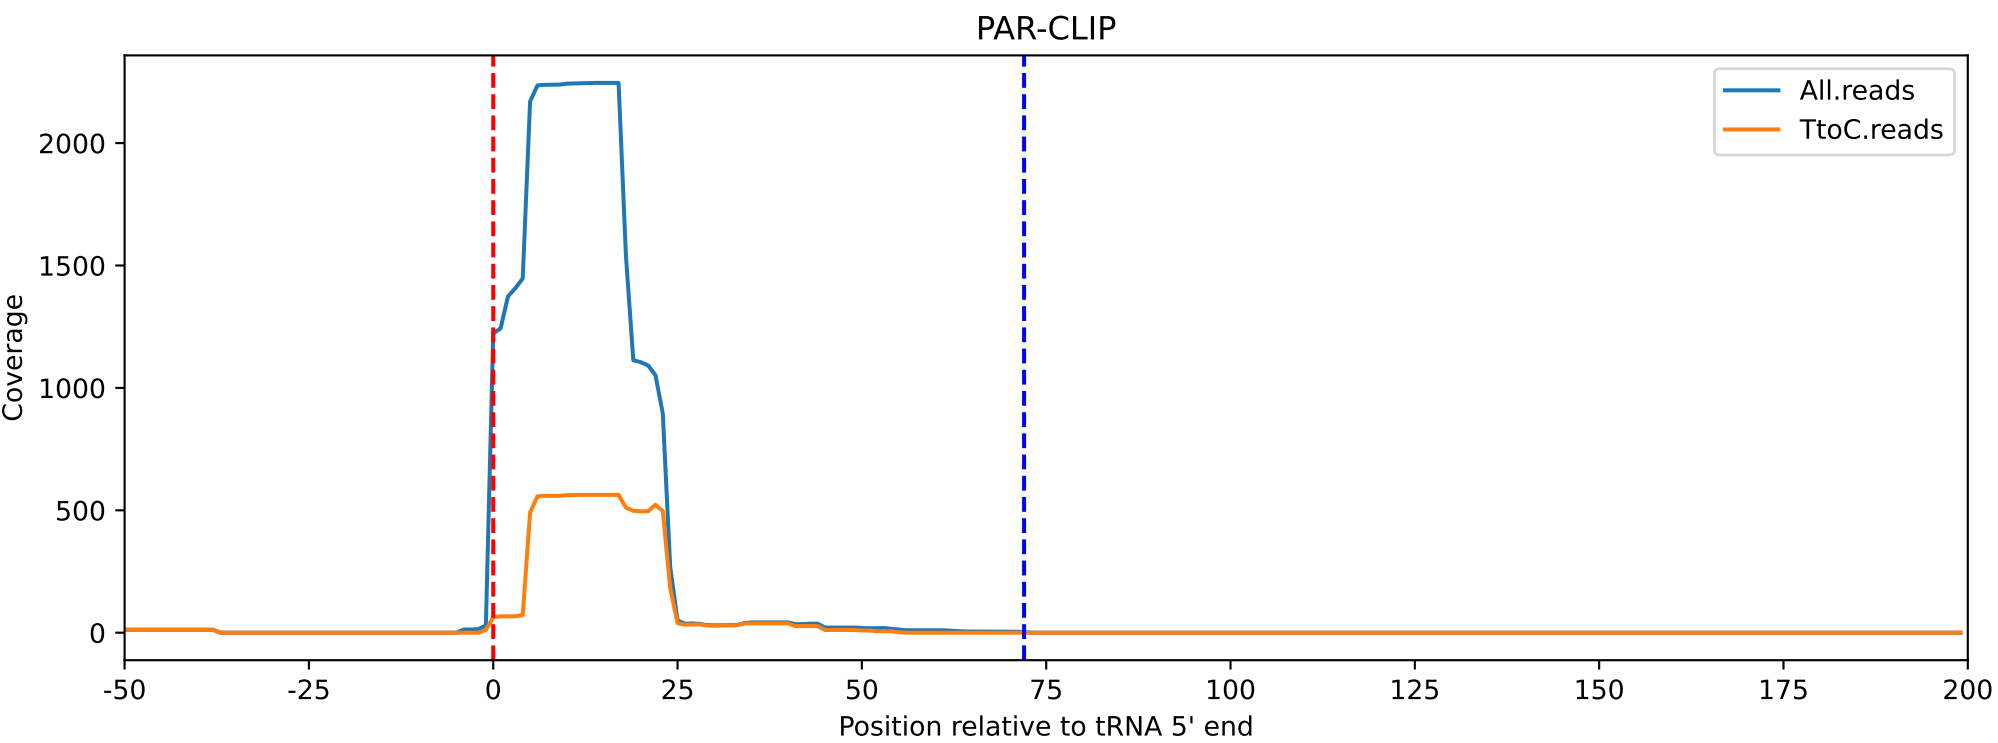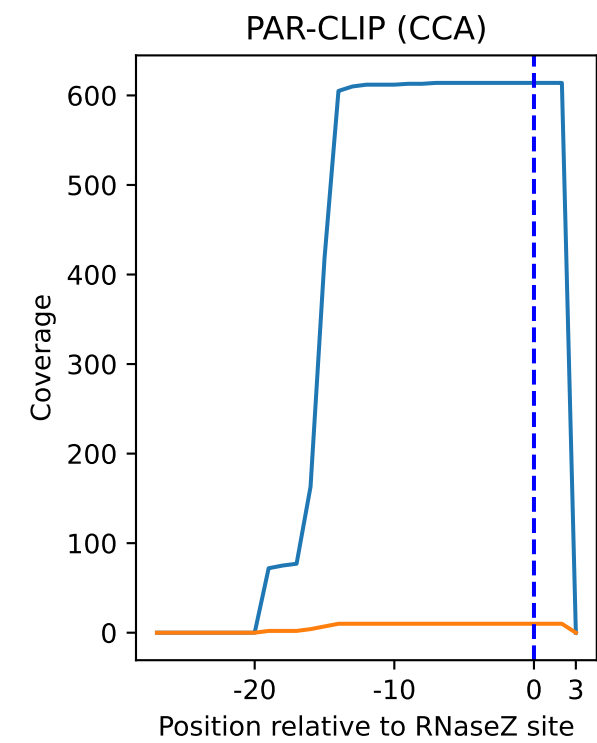

# tRNA-Glu-CTC-3-3

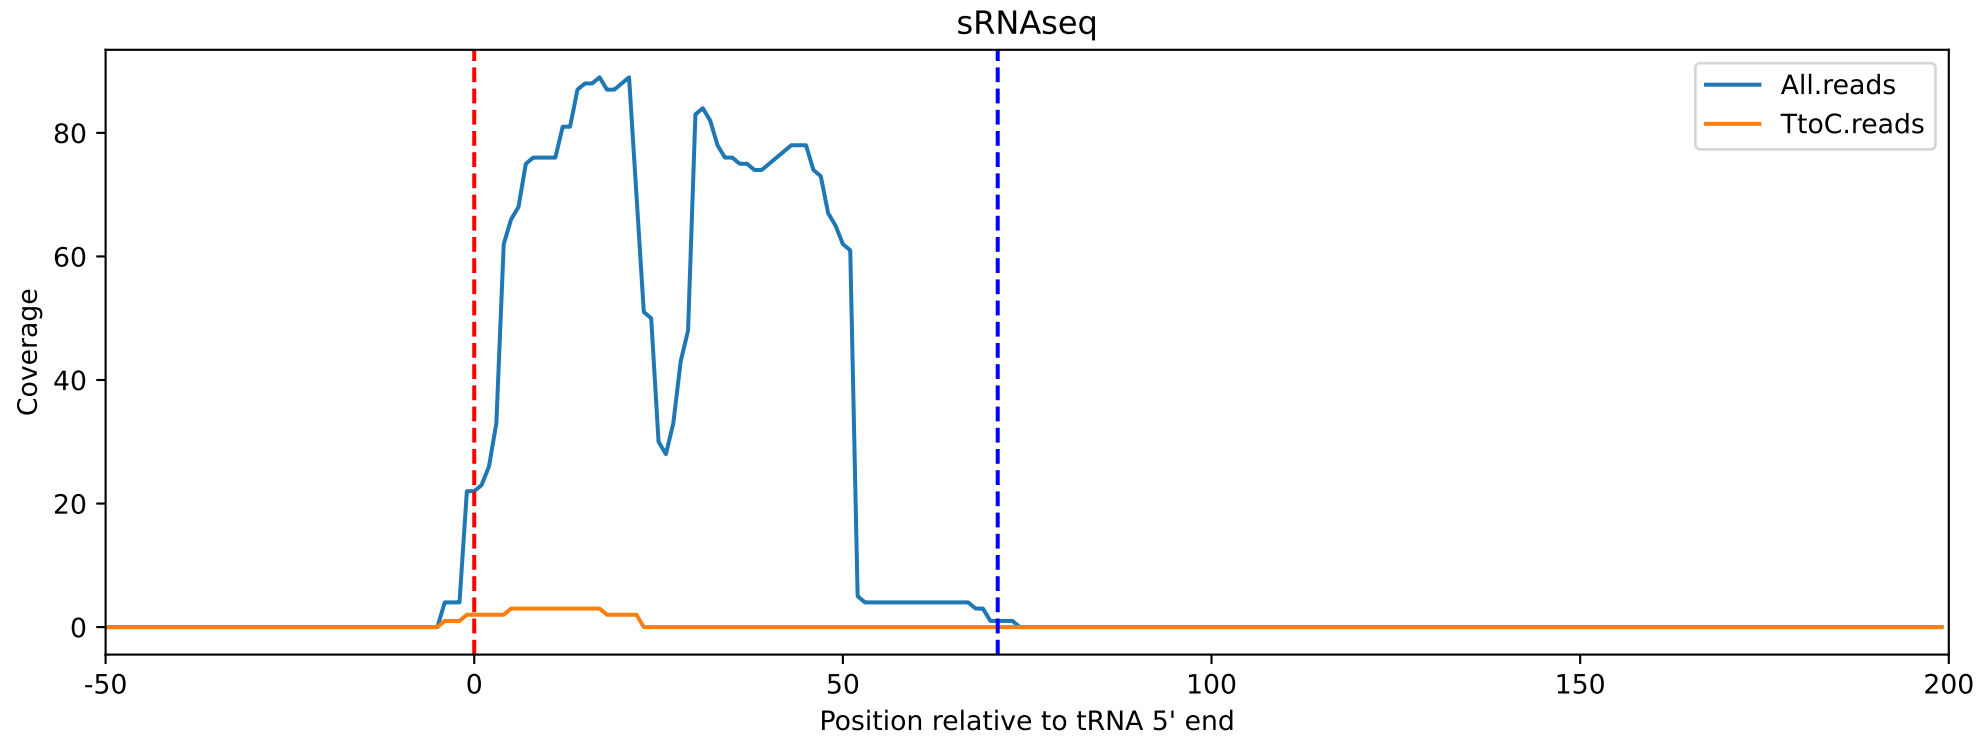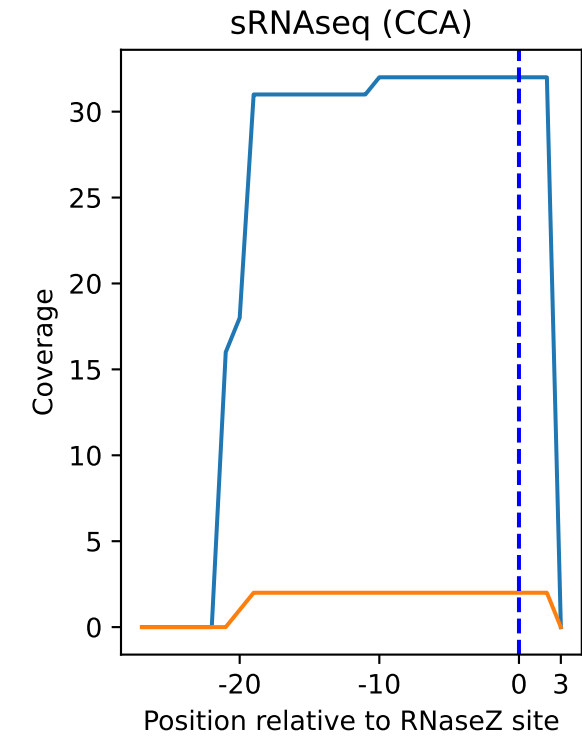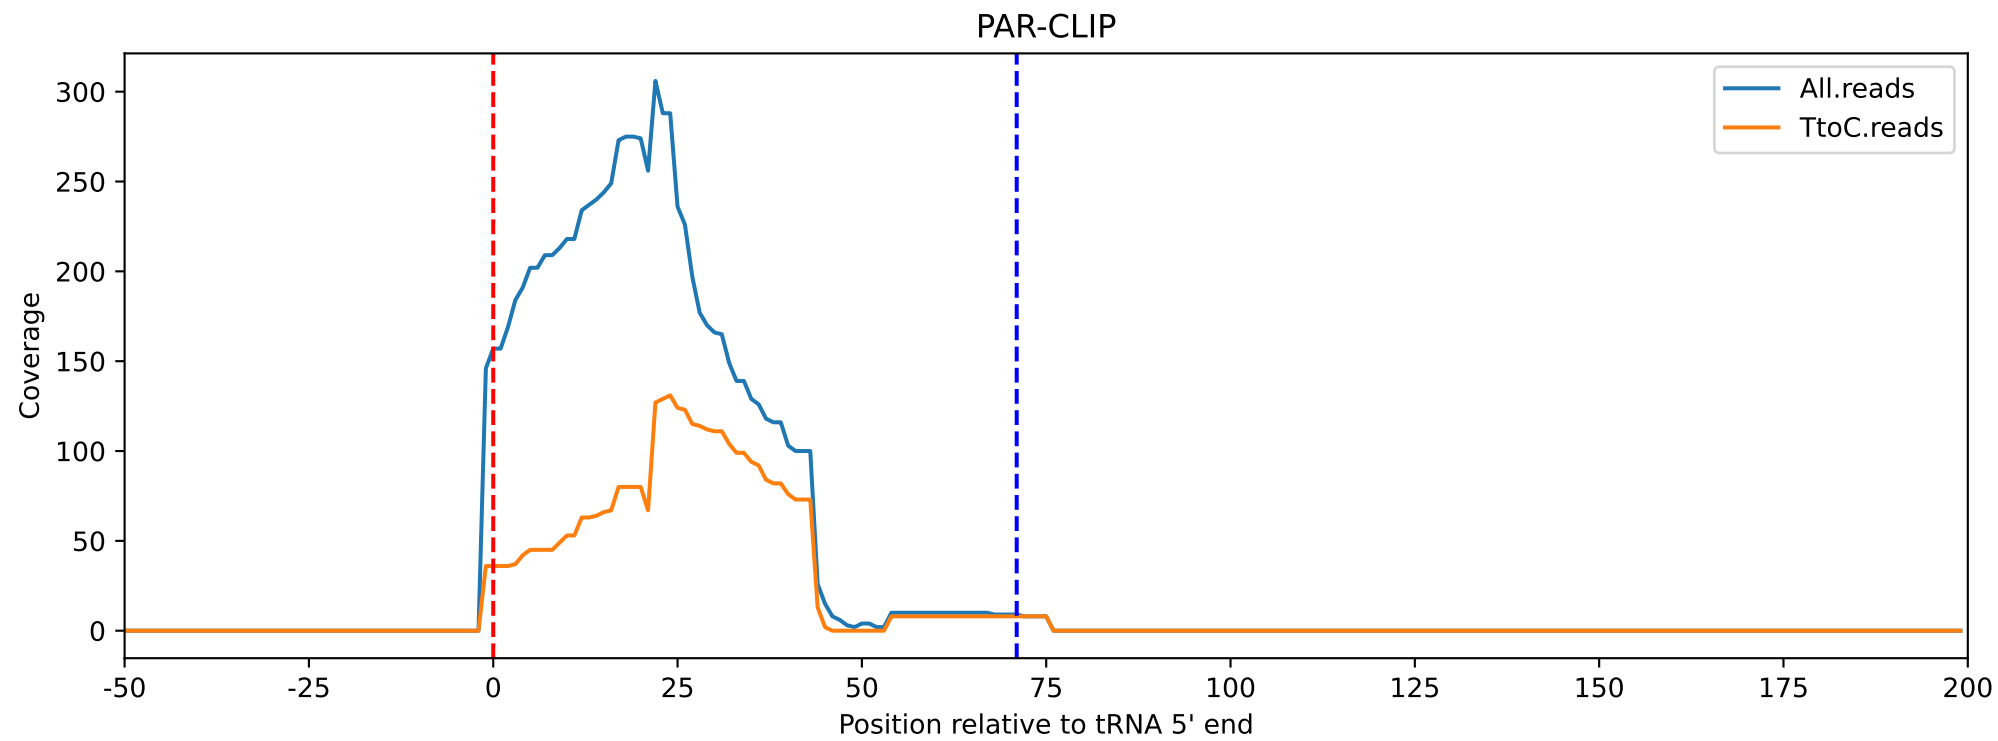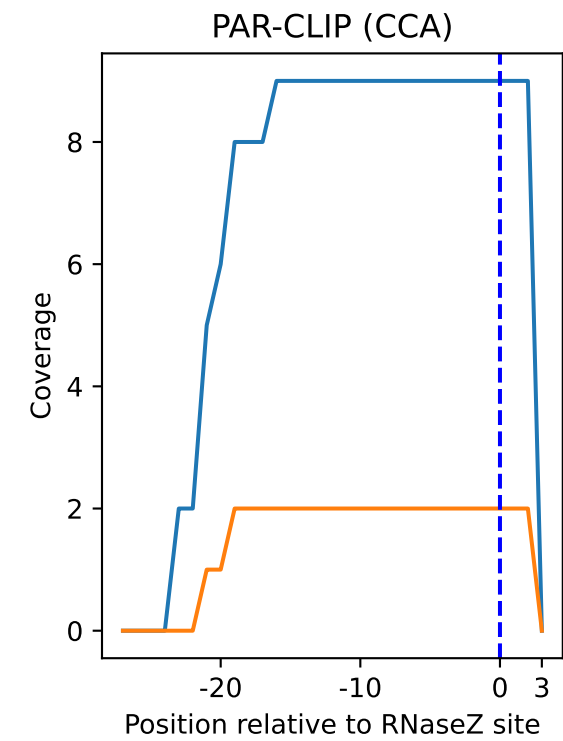

# tRNA-Leu-TAG-1-2

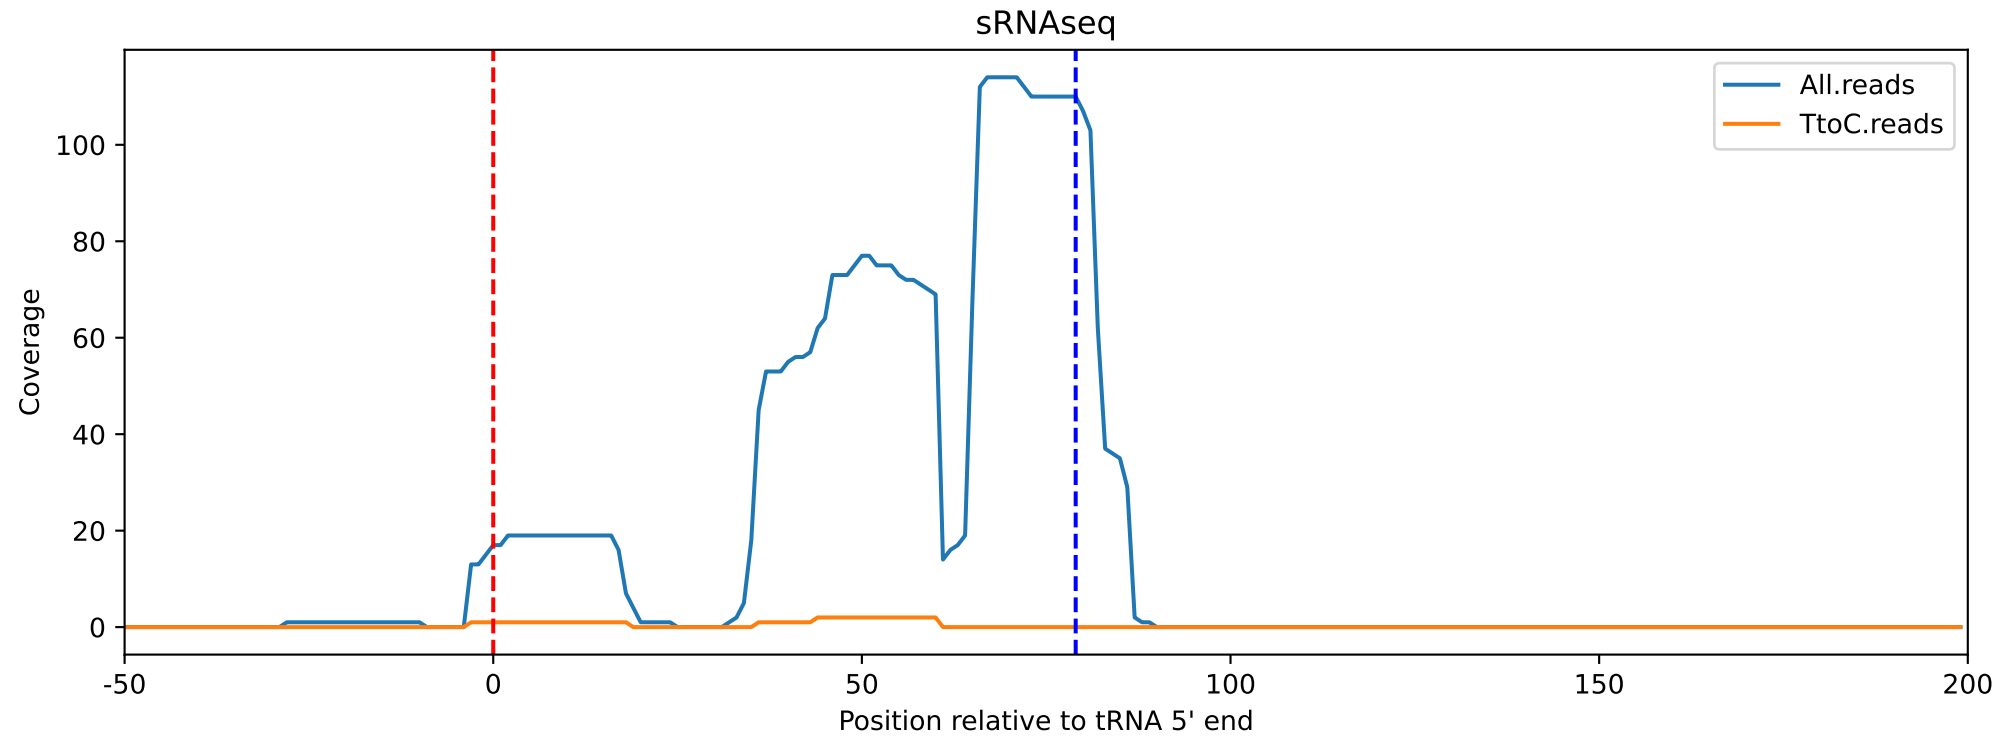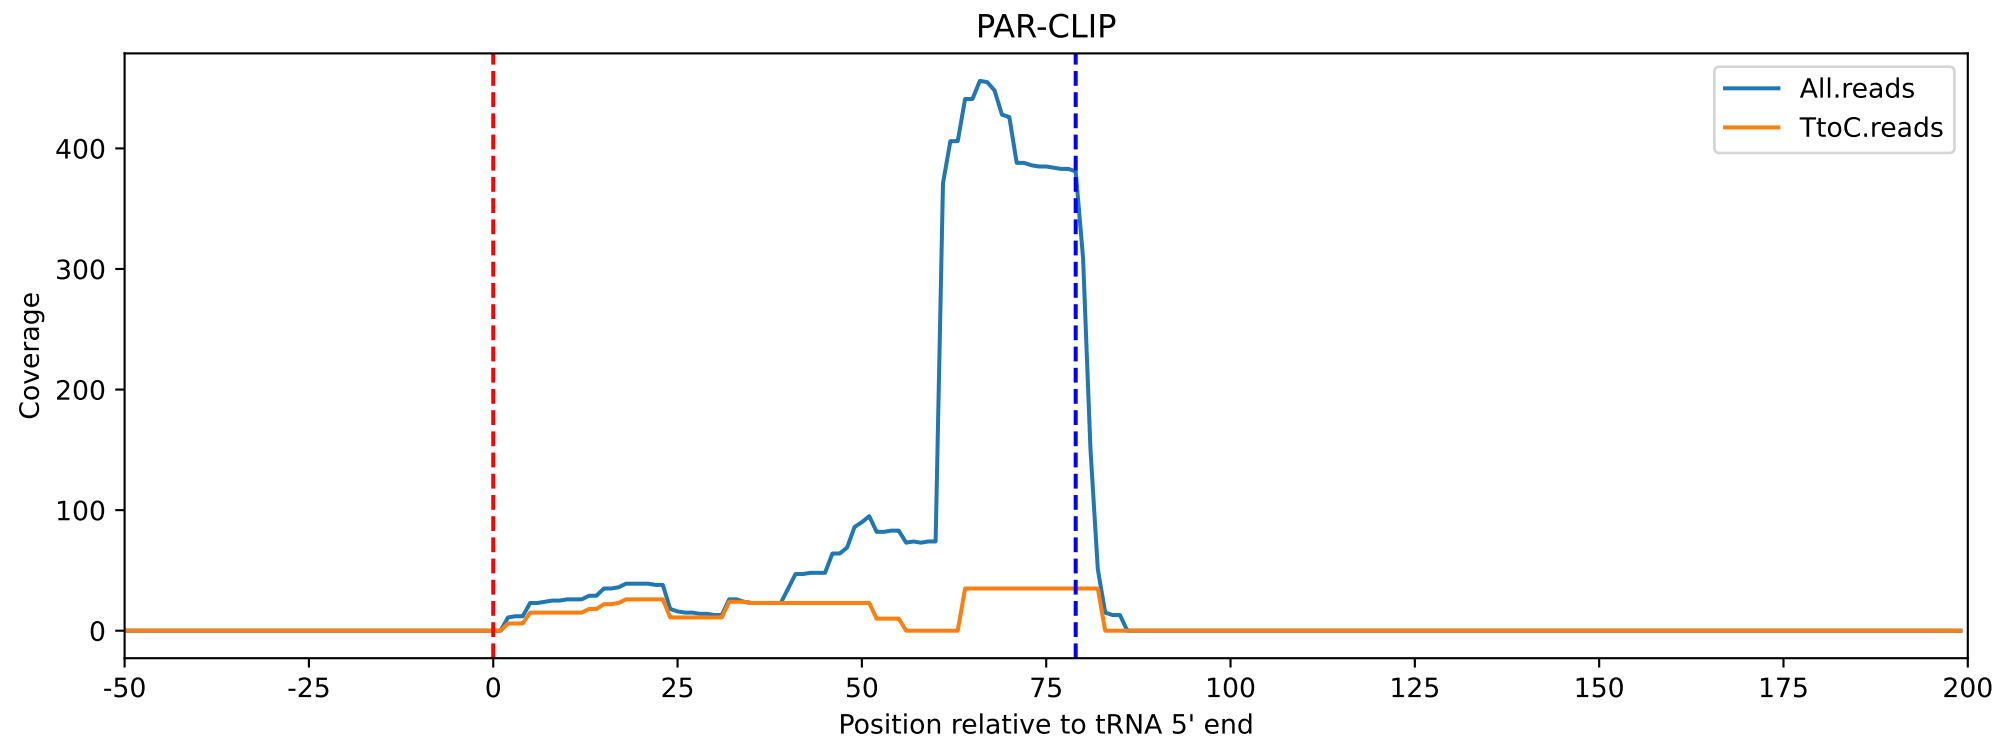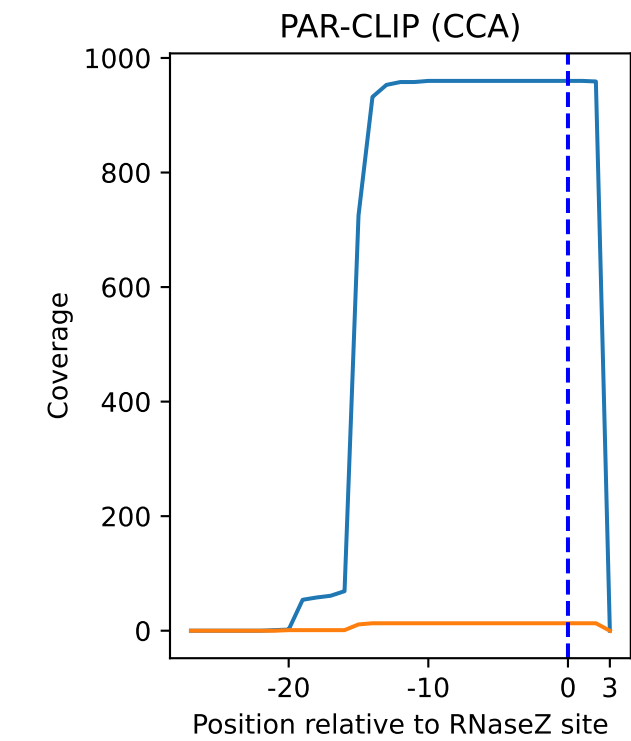

# tRNA-Thr-AGT-1-2

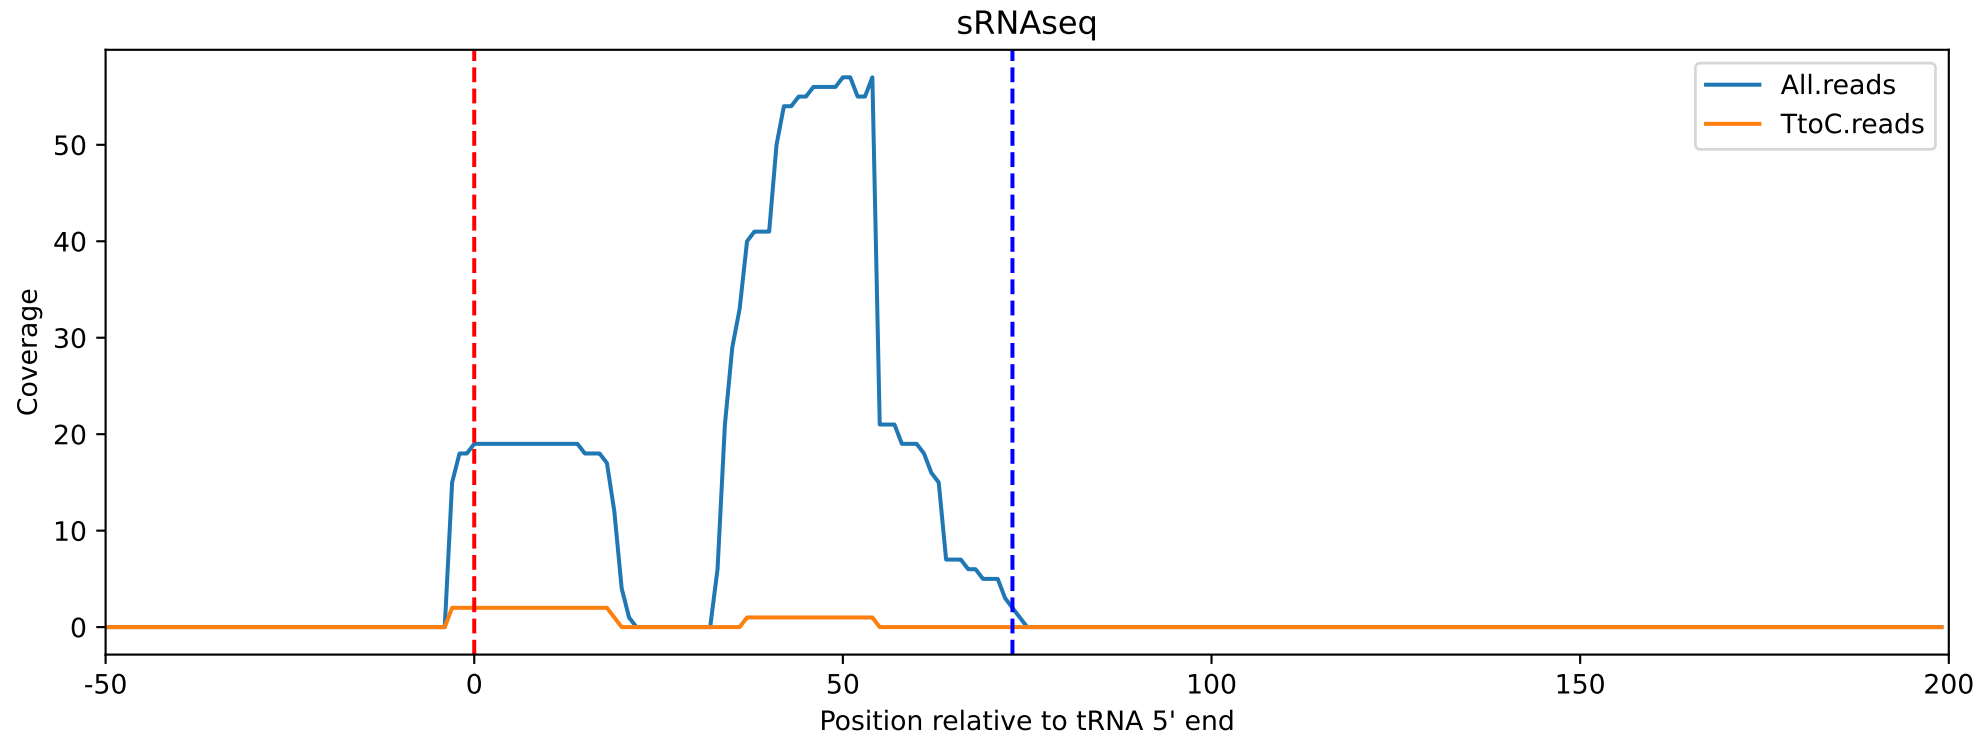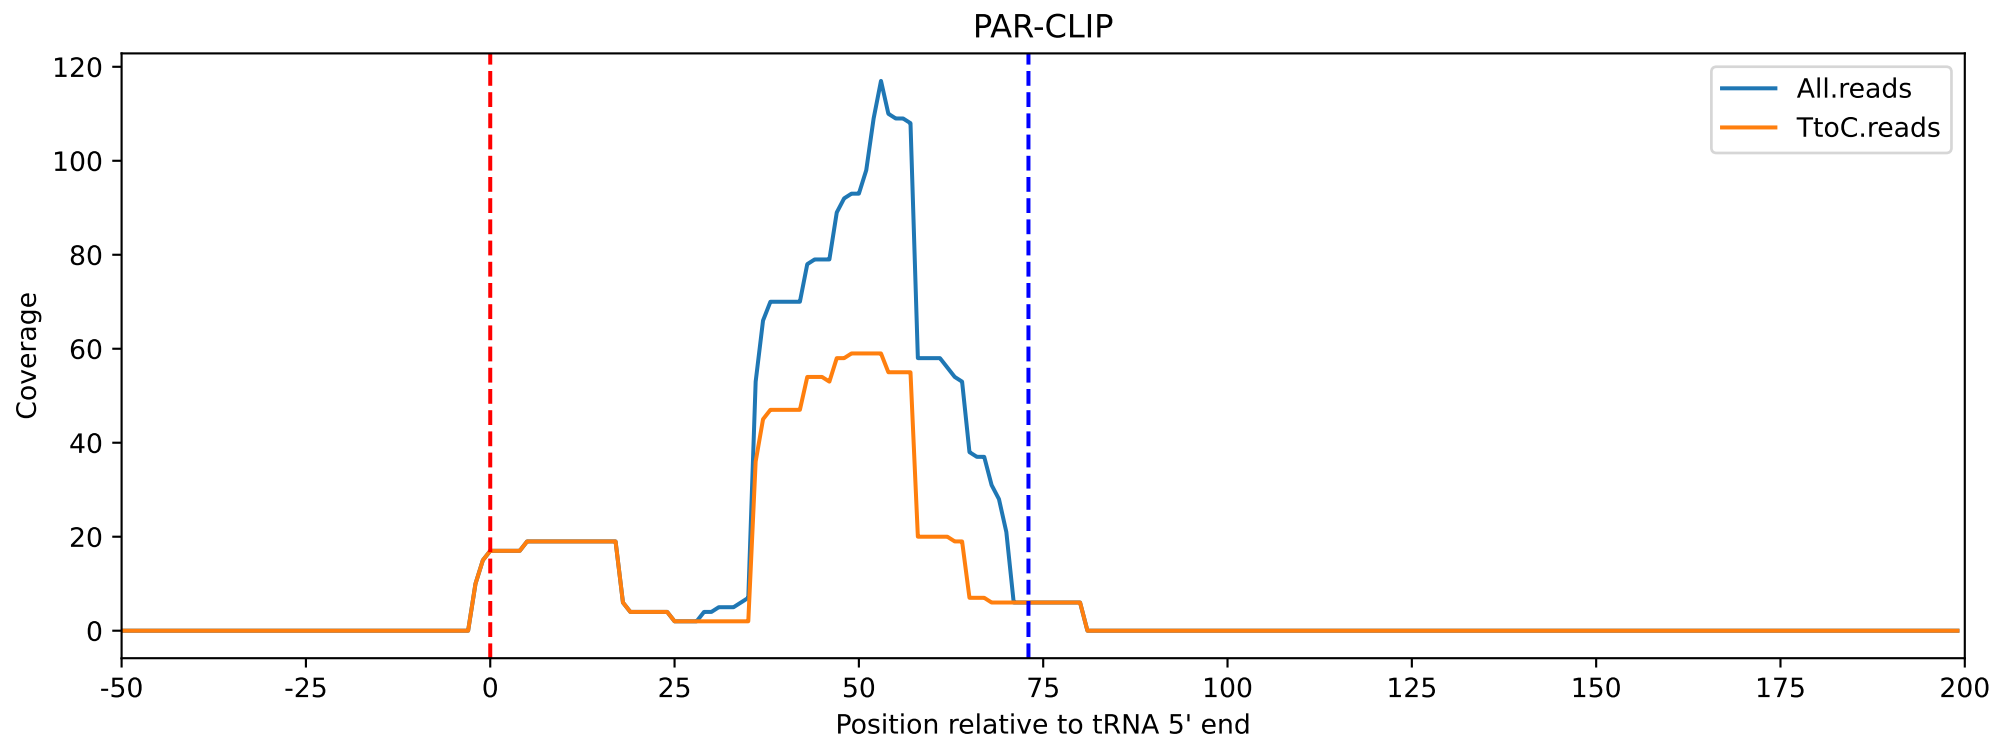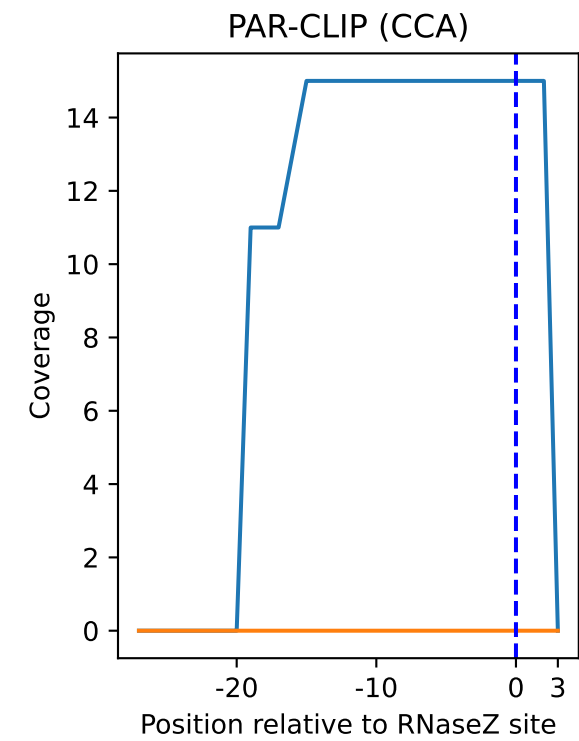

# tRNA-Ala-TGC-1-1

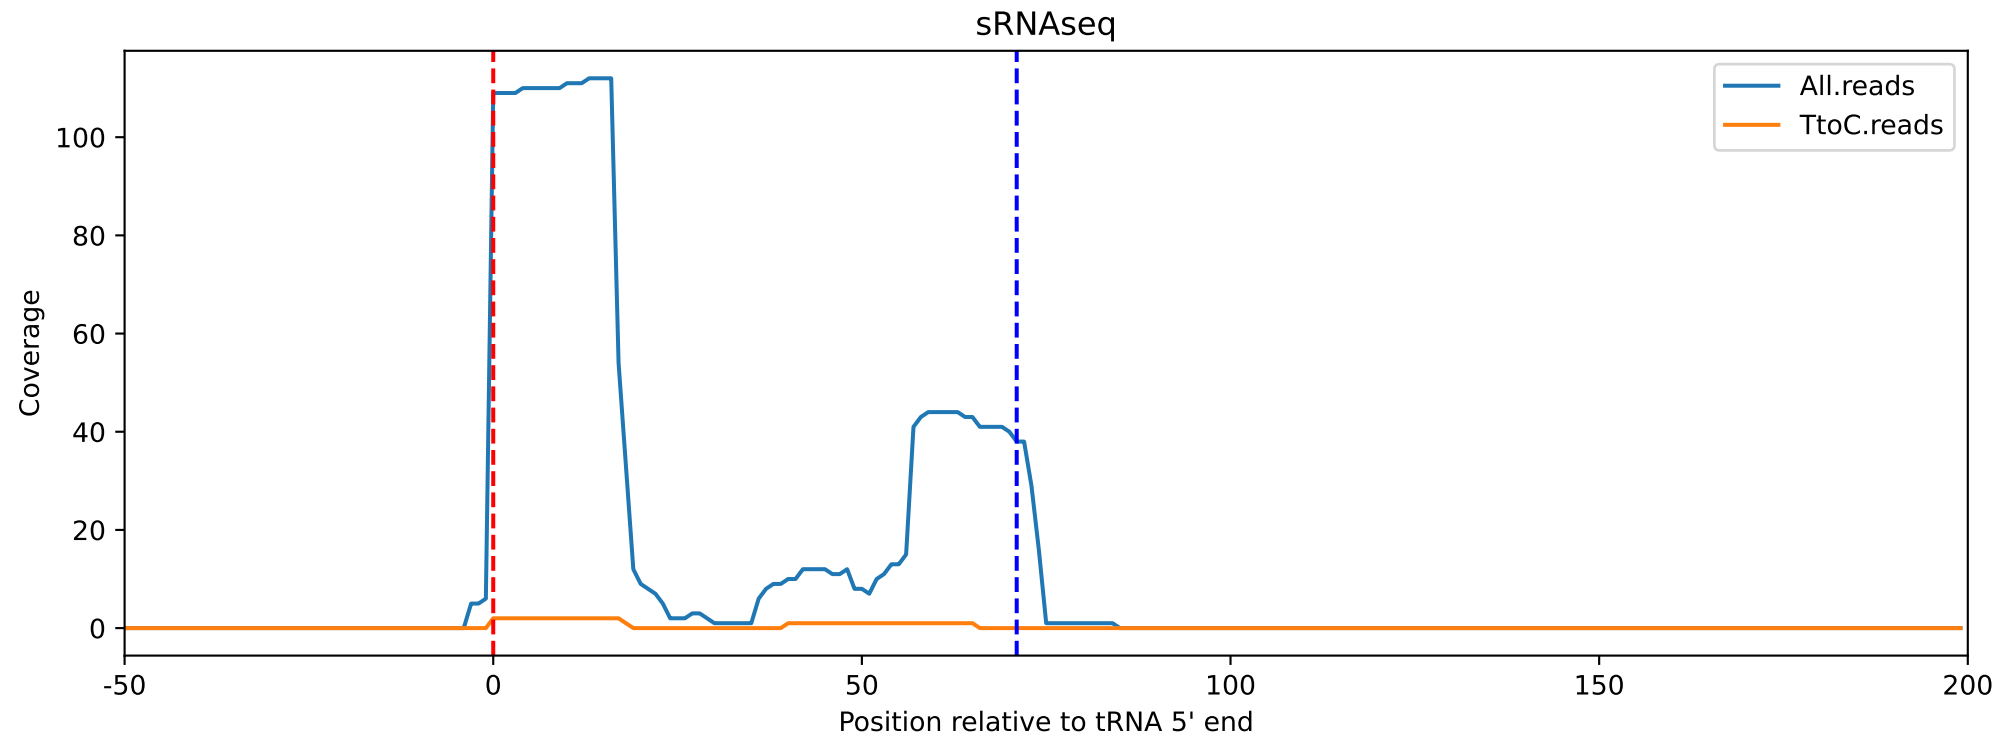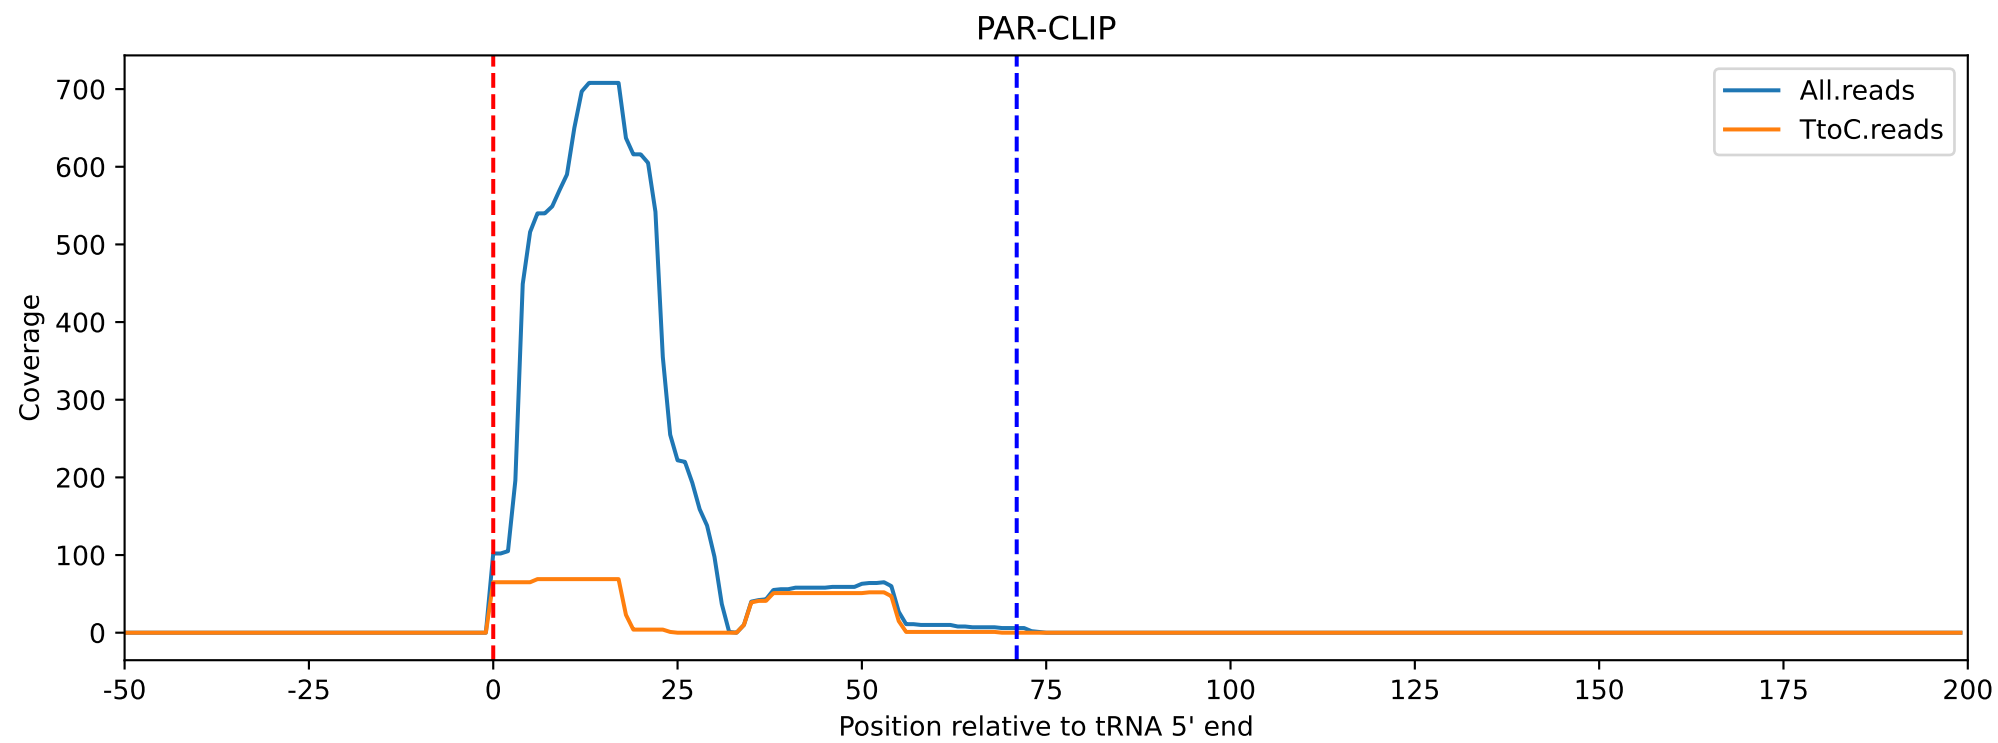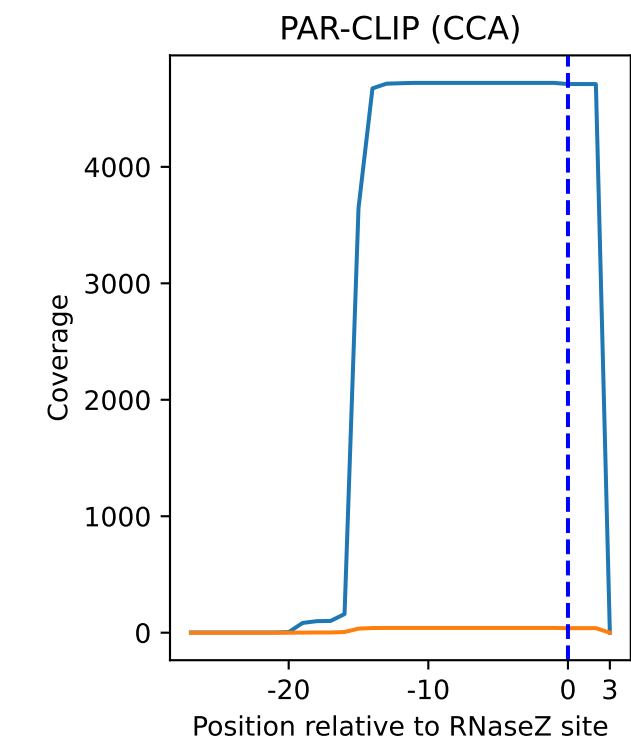

# tRNA-Gln-TTG-1-1

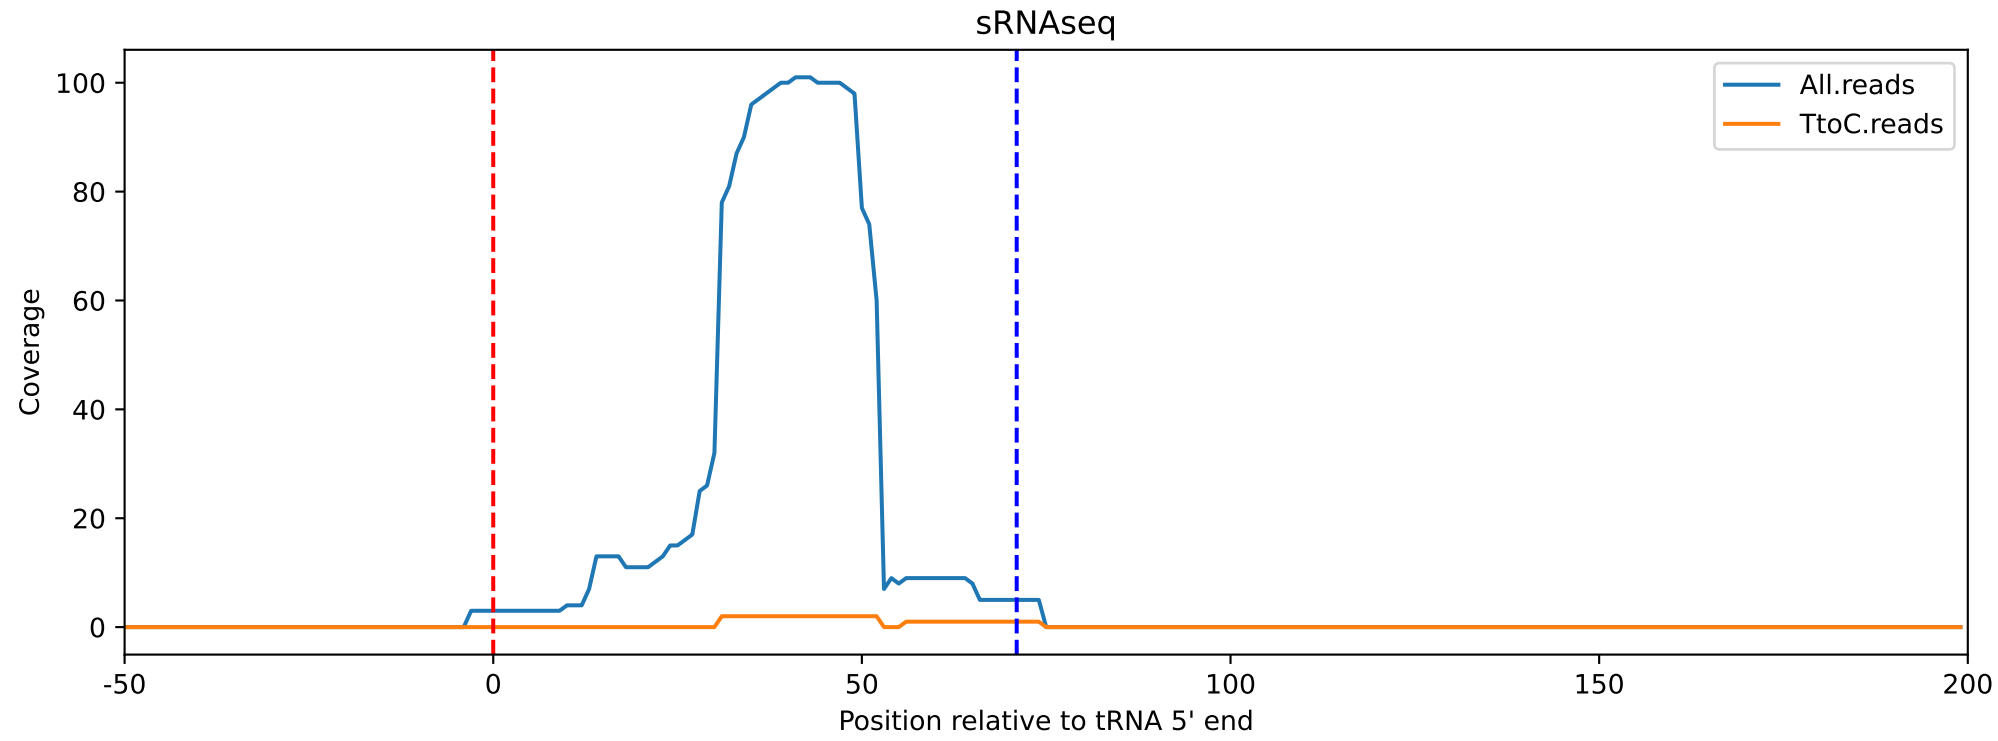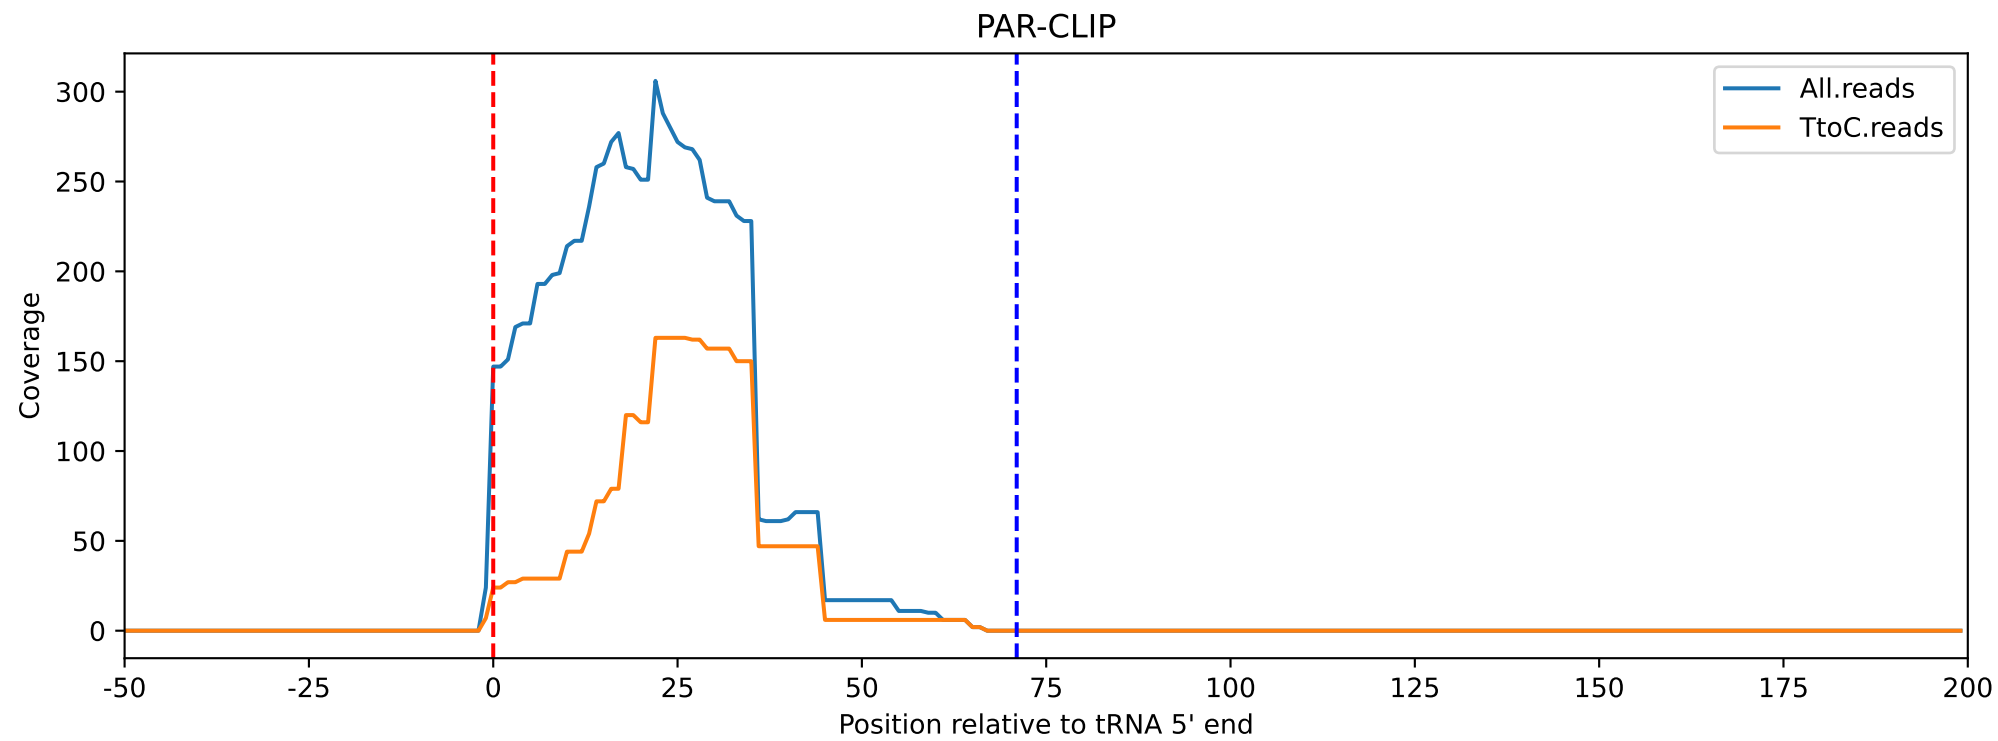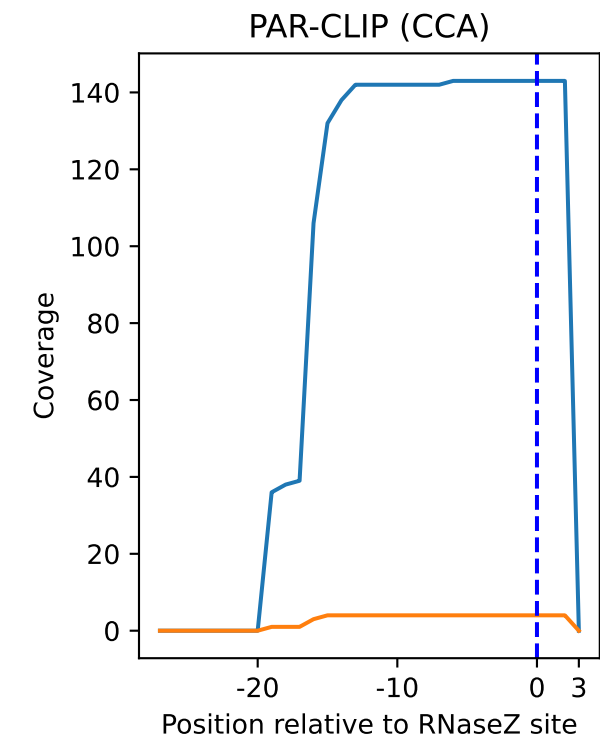

# tRNA-Gly-TCC-2-1

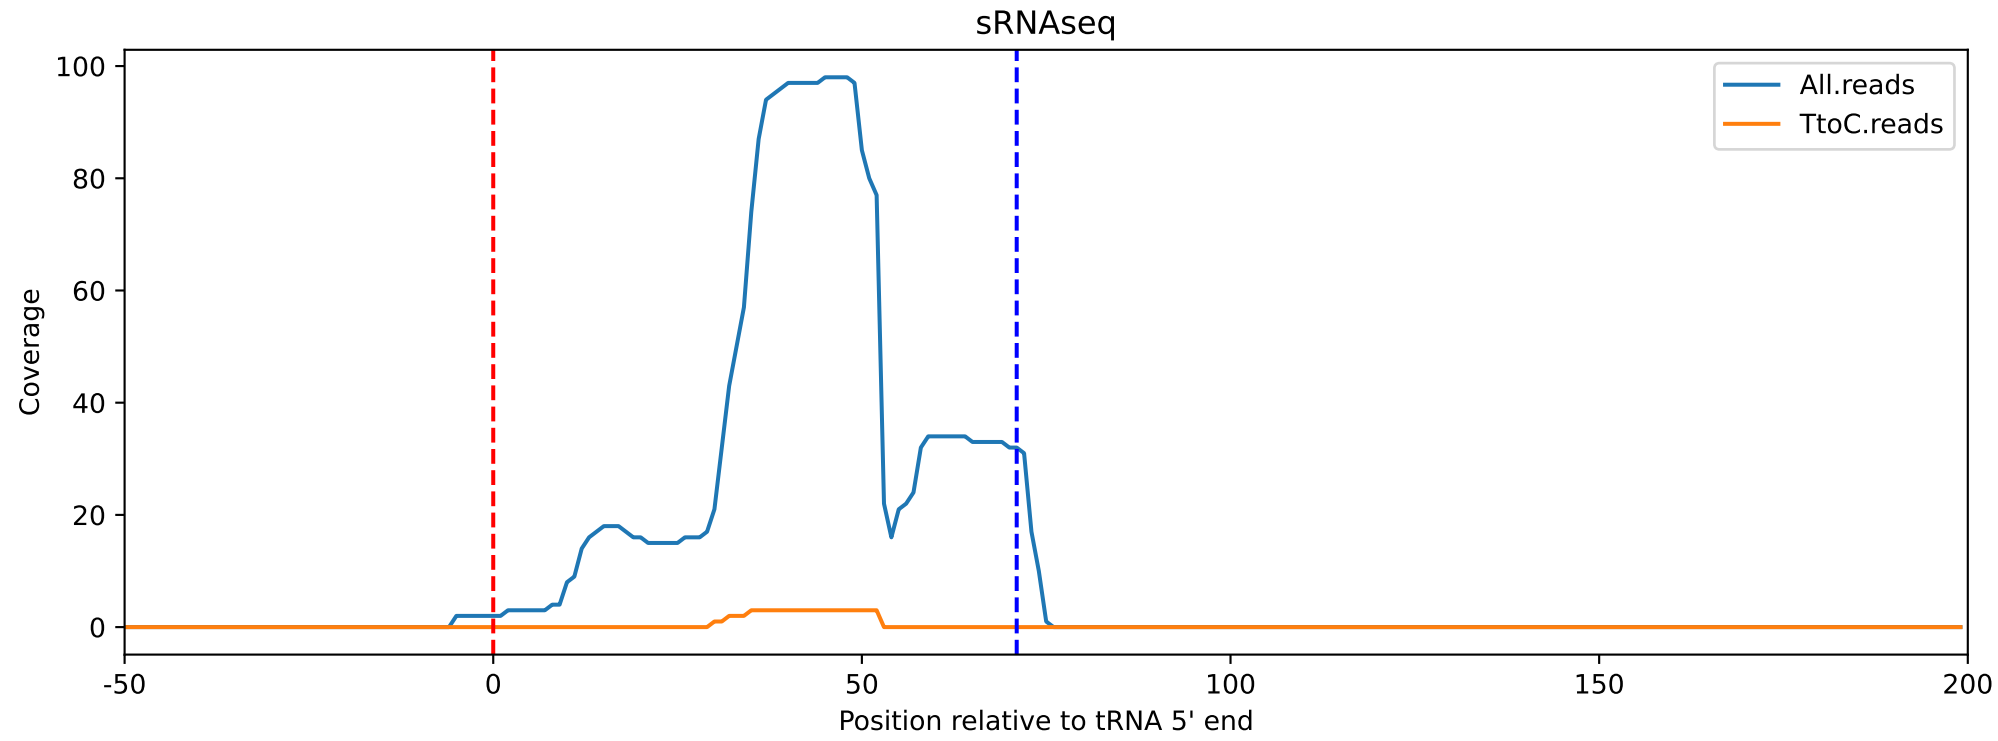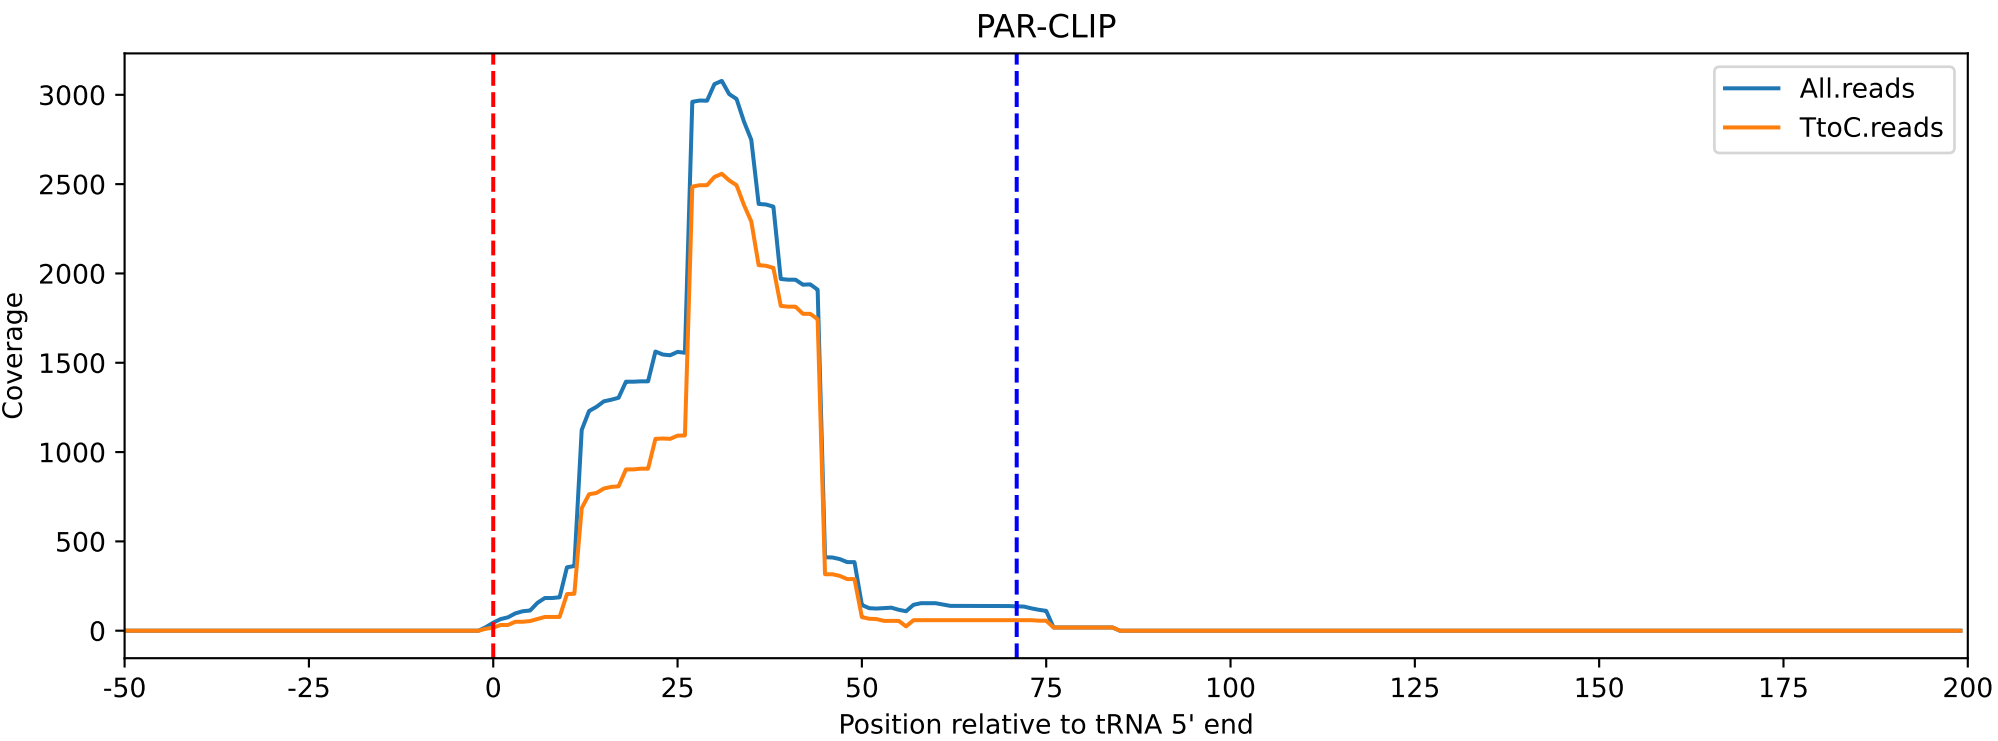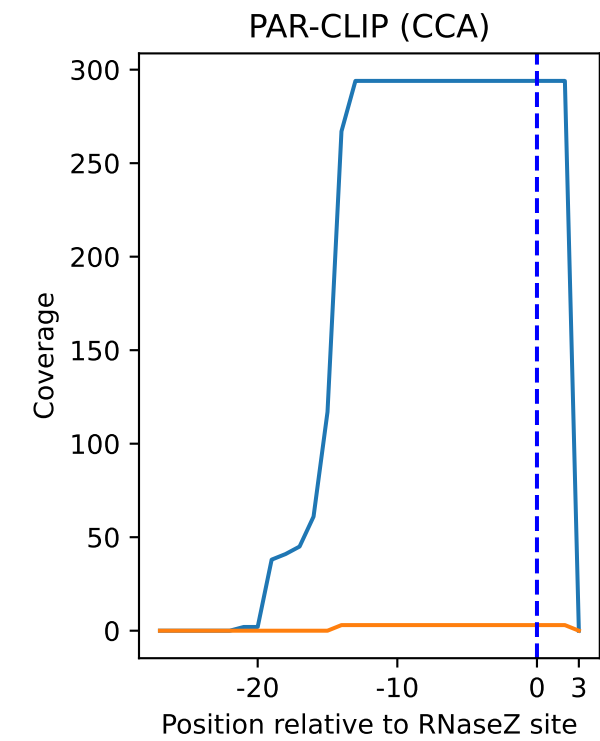



# tRNA-Trp-CCA-2-5

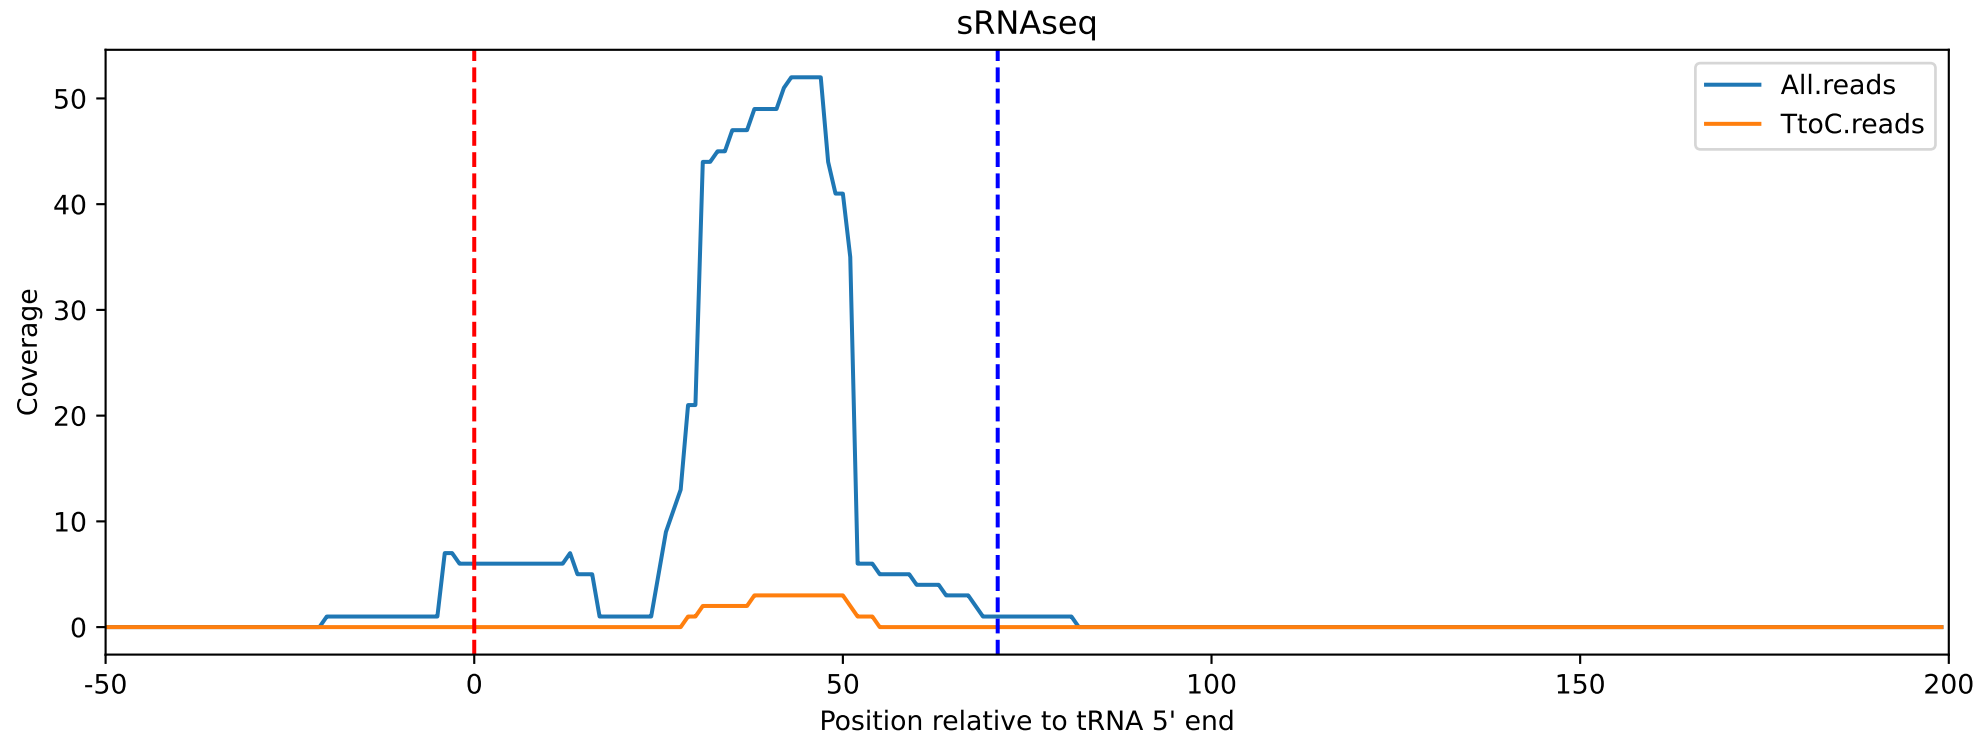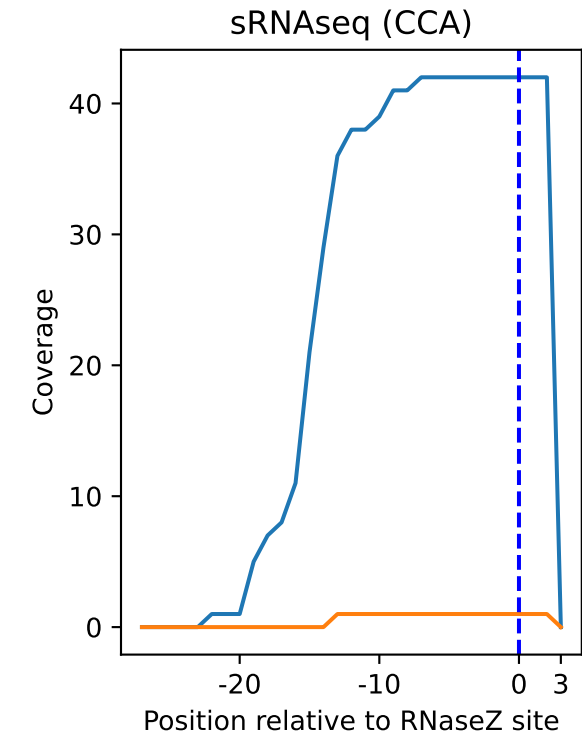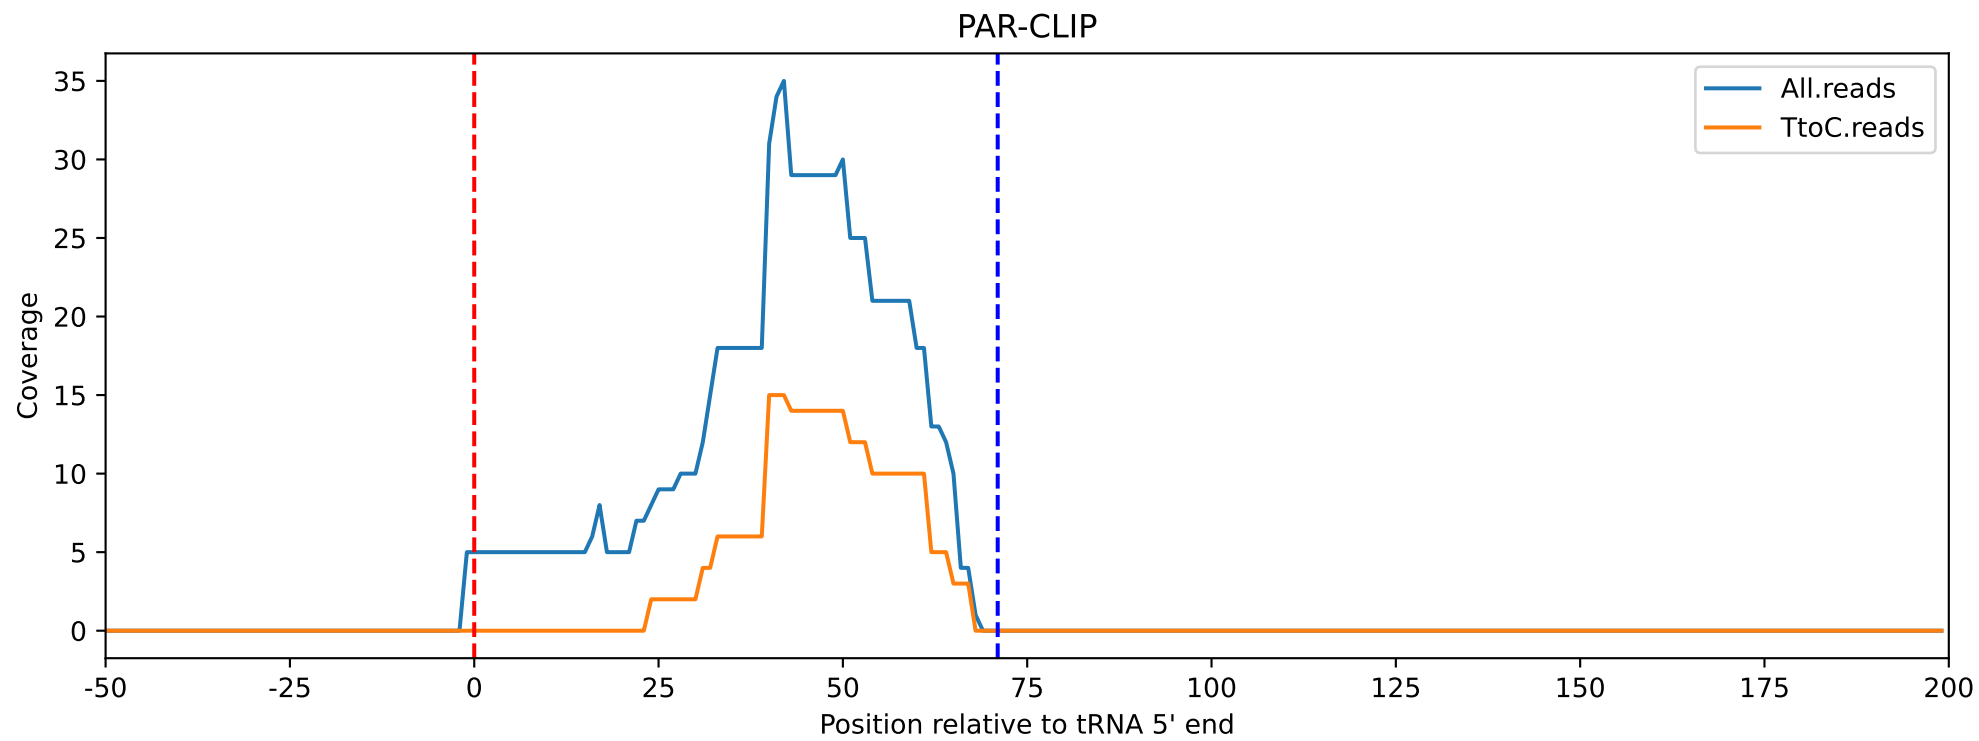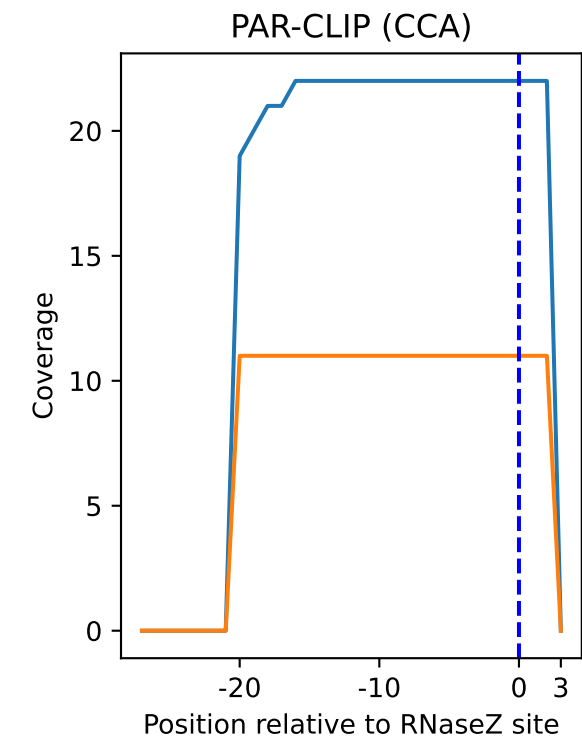

# tRNA-Ile-TAT-1-1

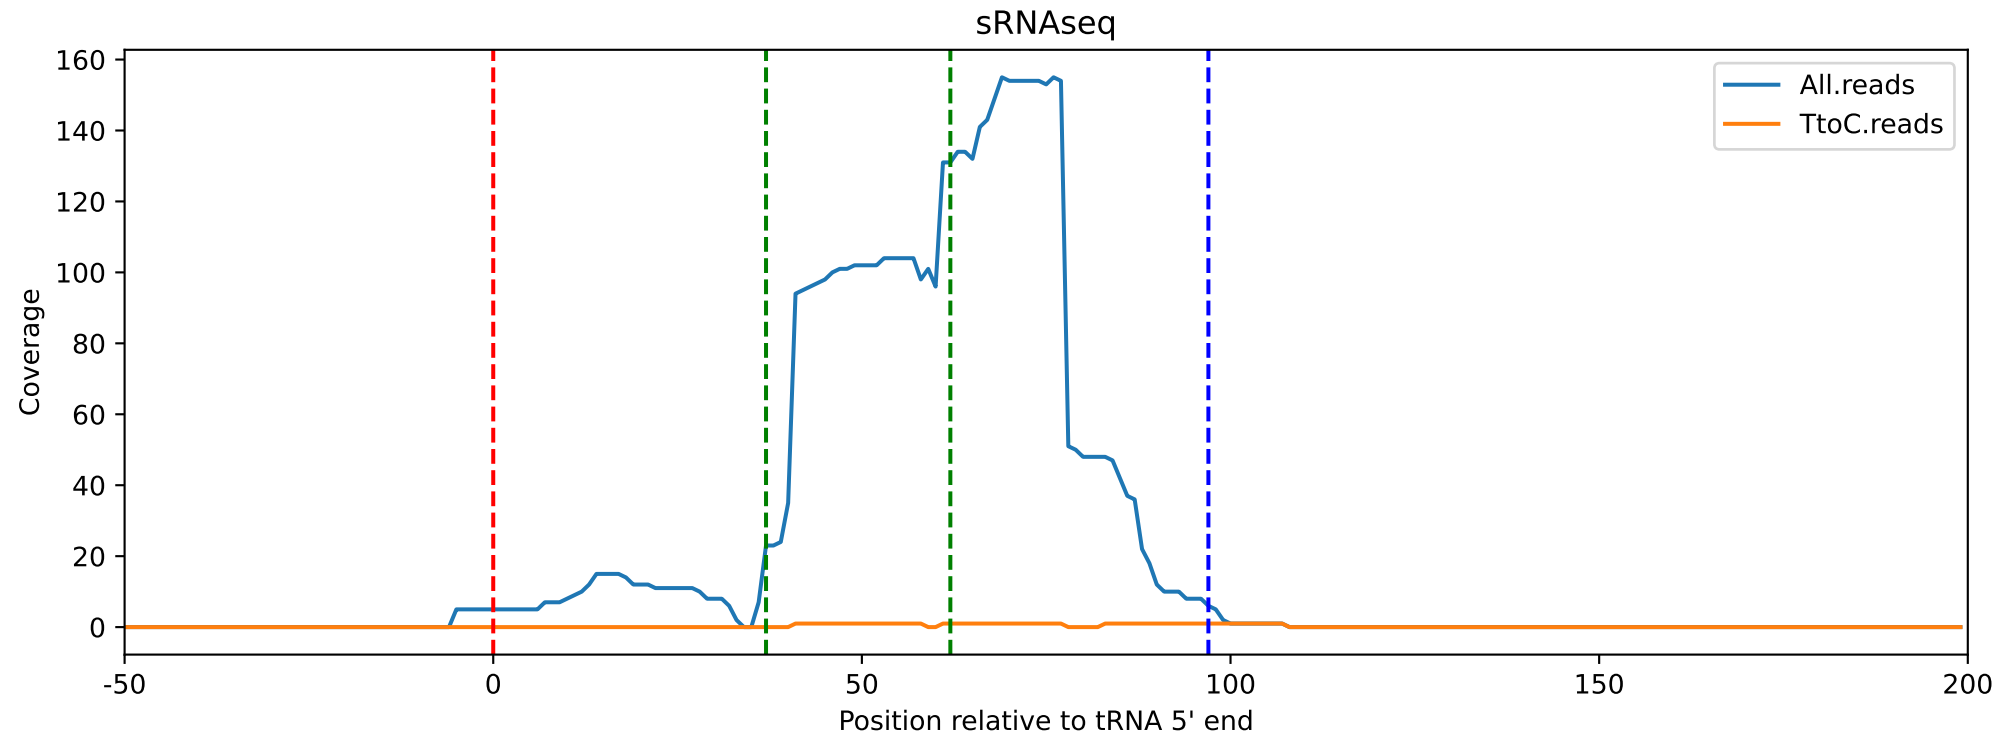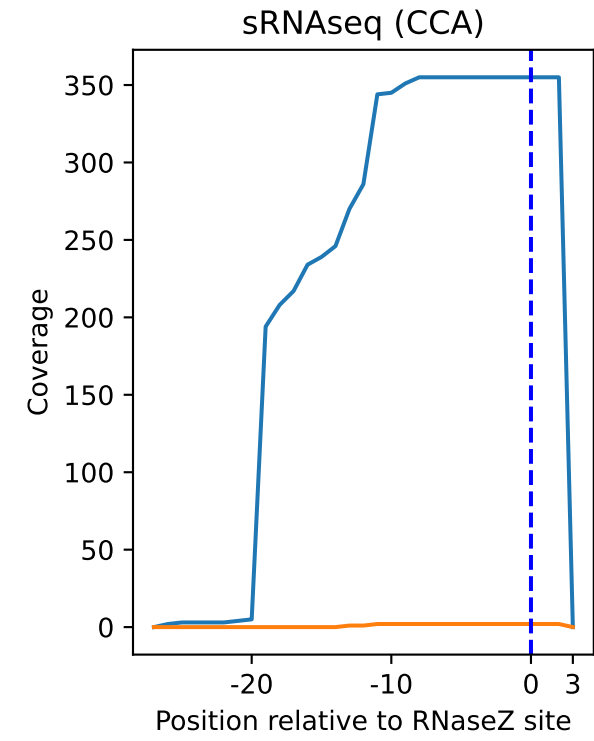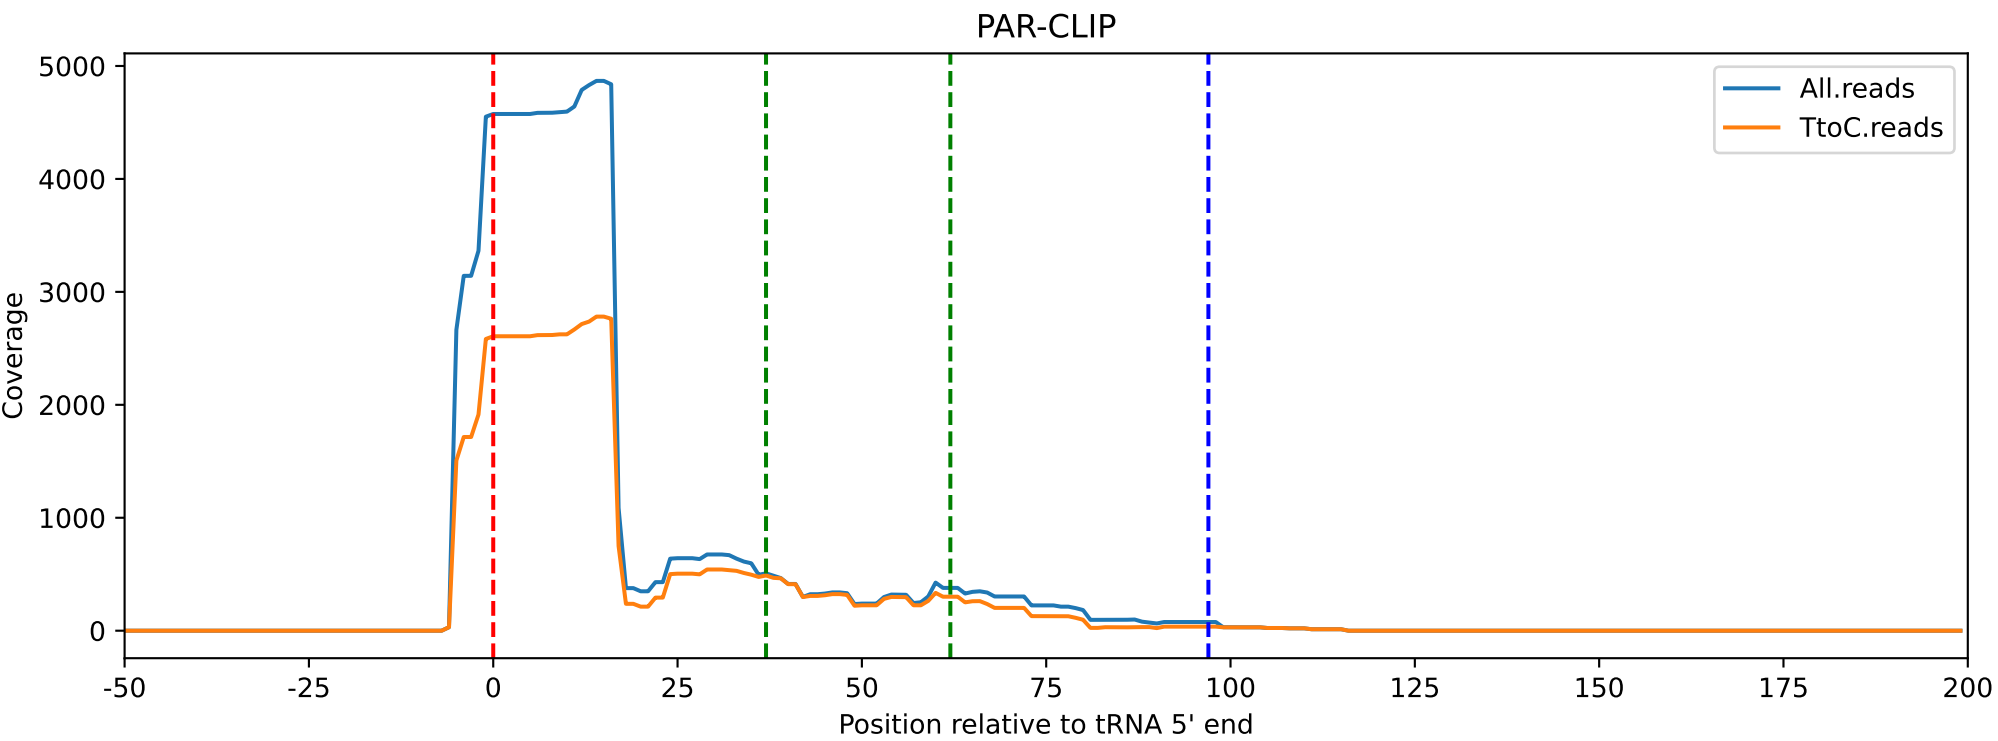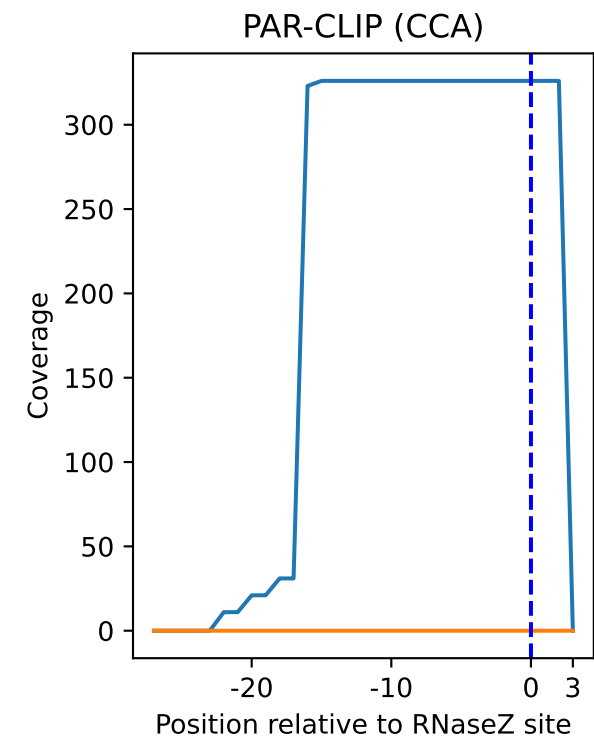

# tRNA-Ala-AGC-2-5

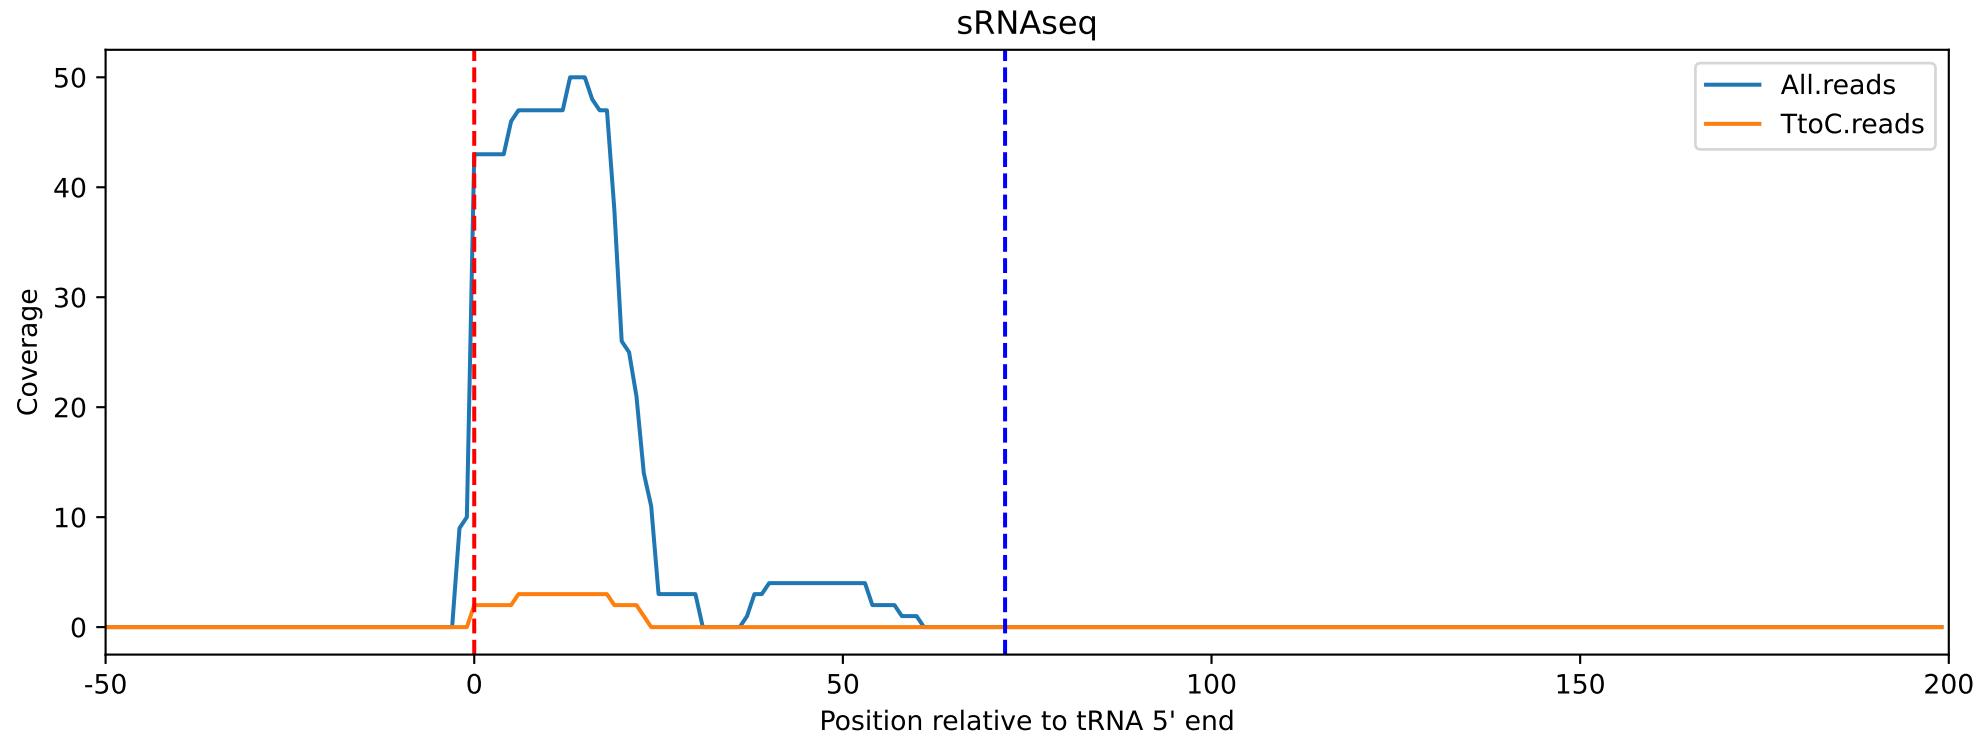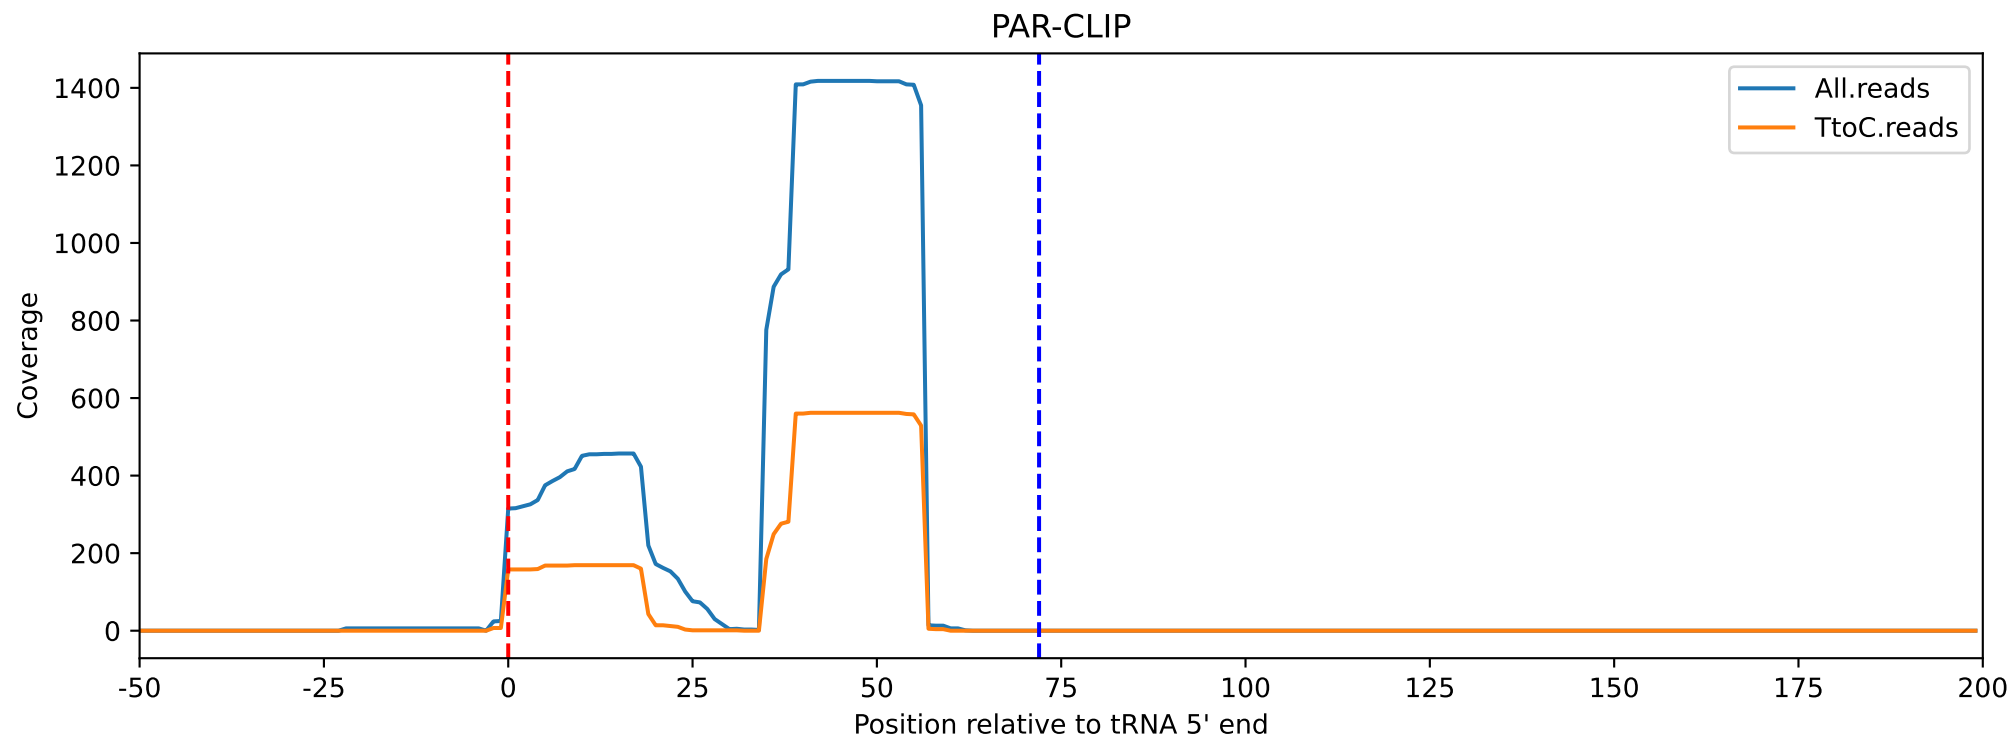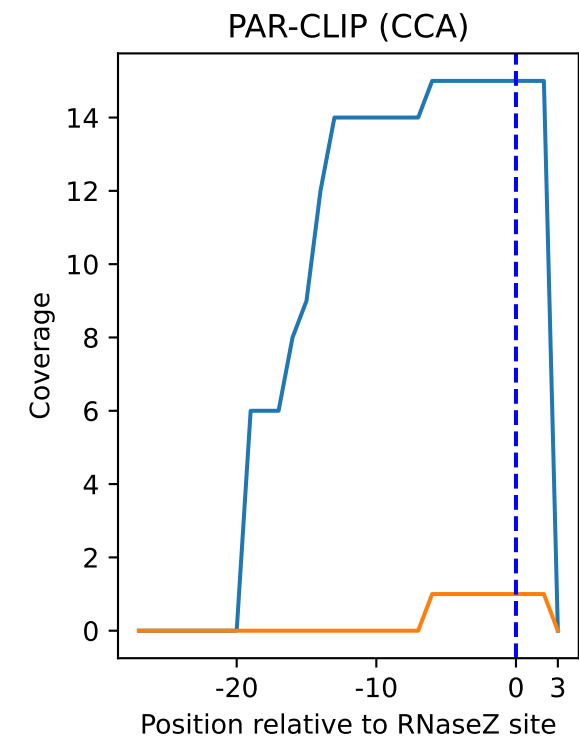

# tRNA-Gly-GCC-1-6

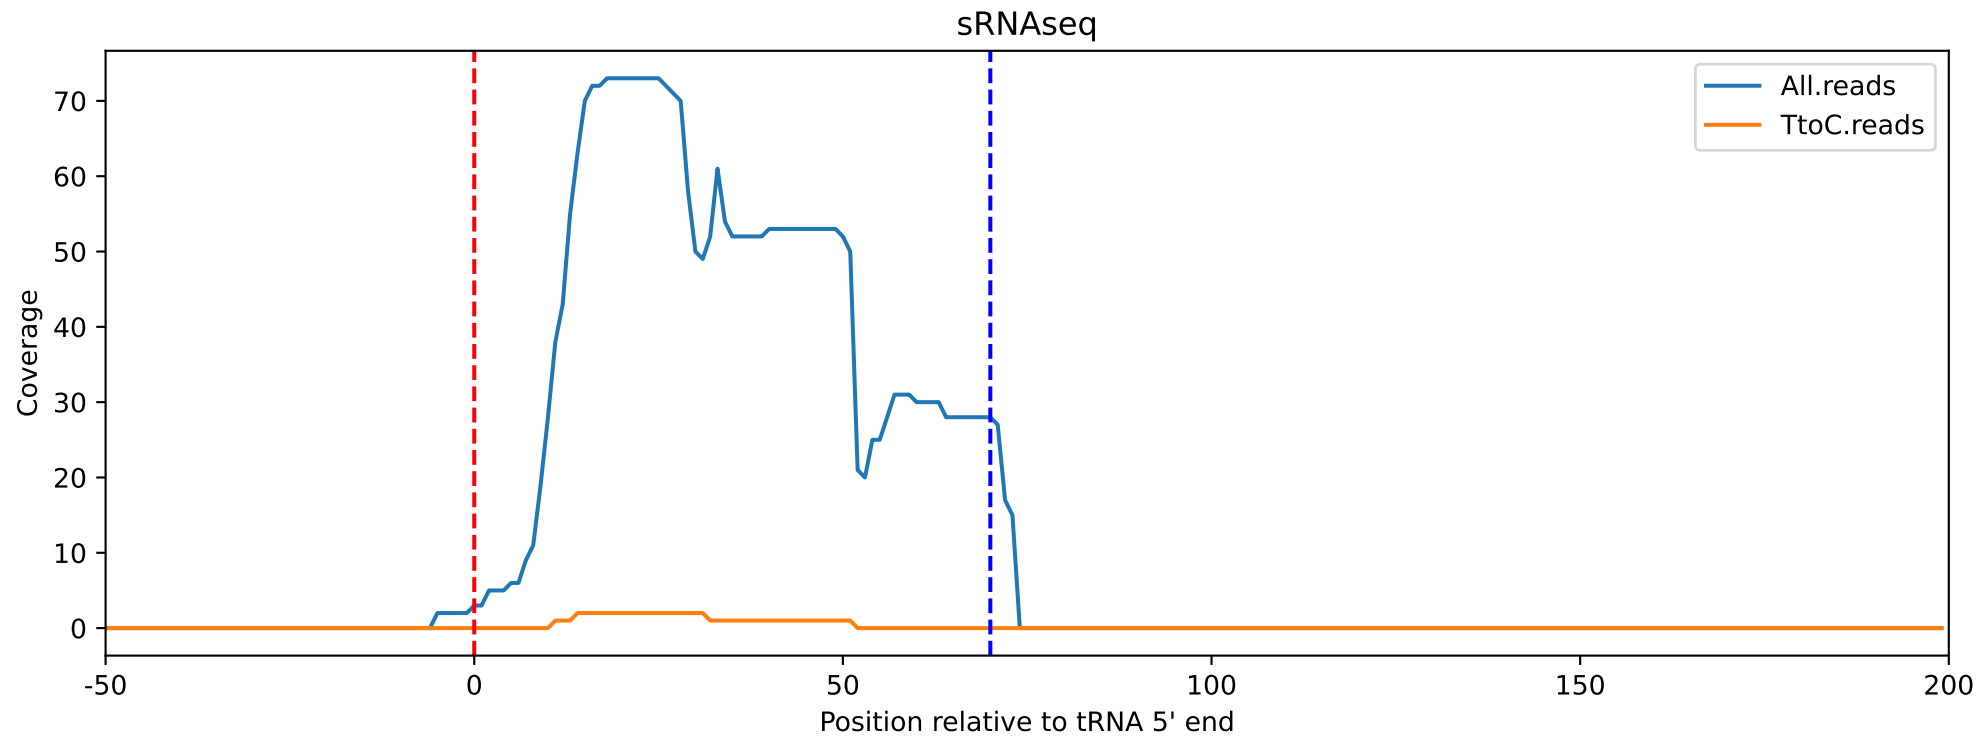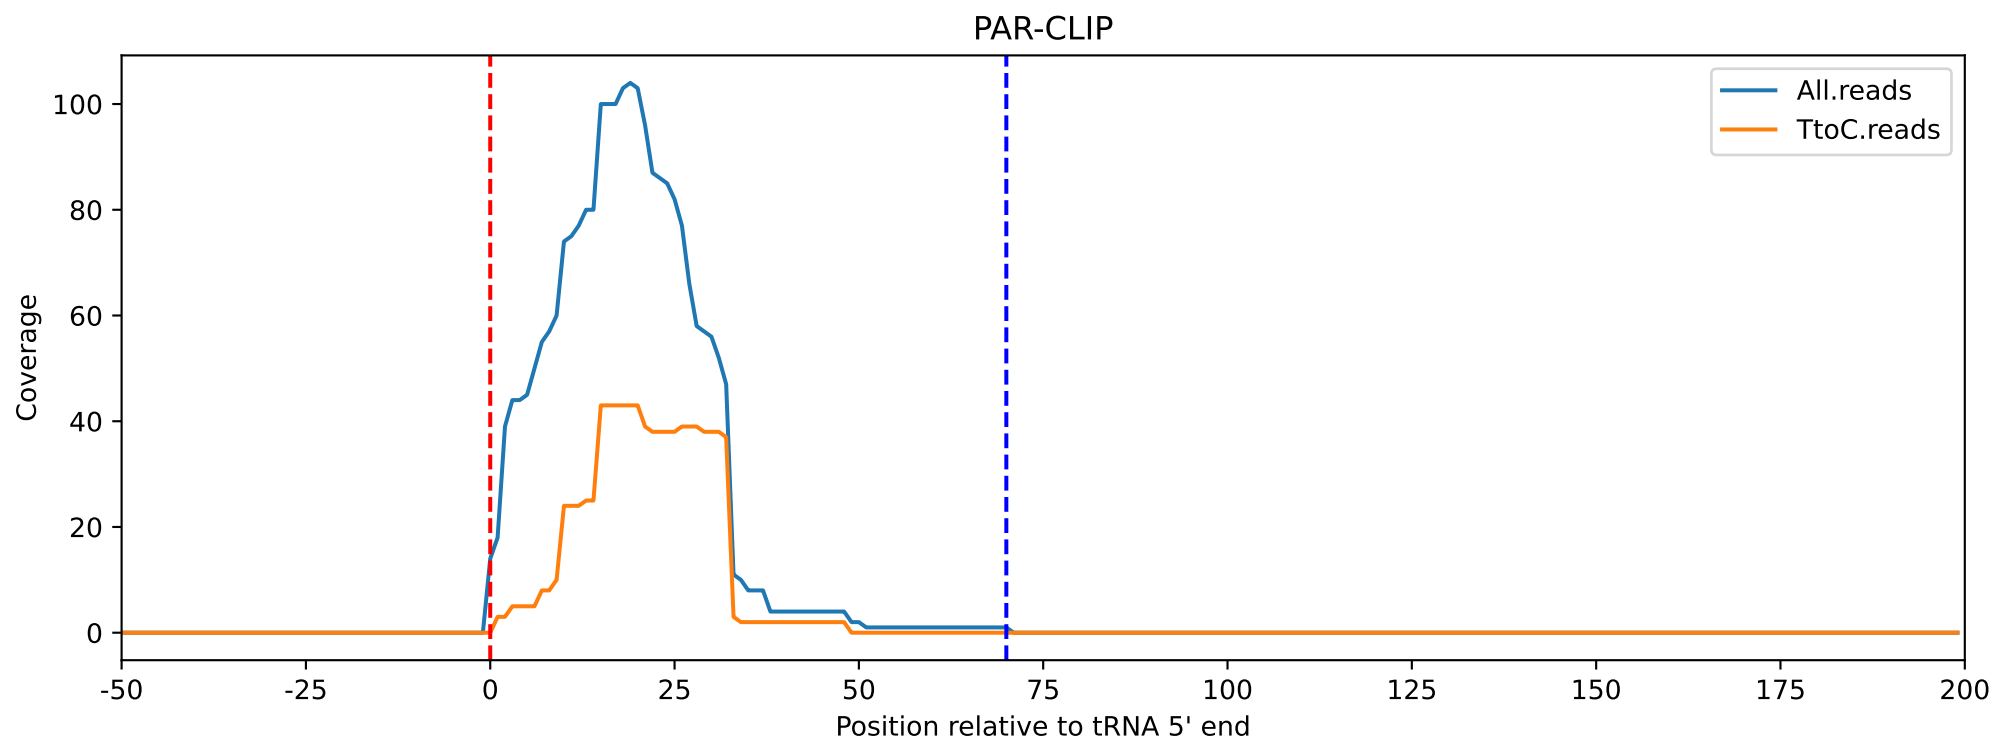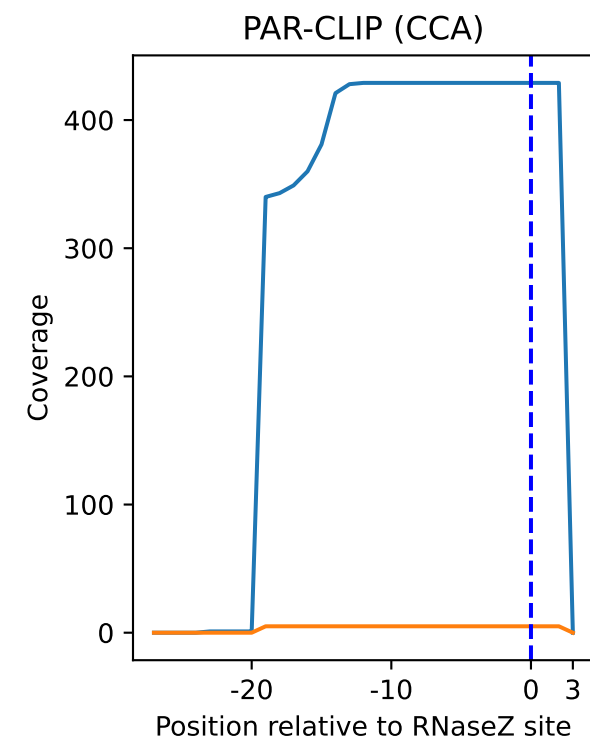

# tRNA-Ala-AGC-2-6

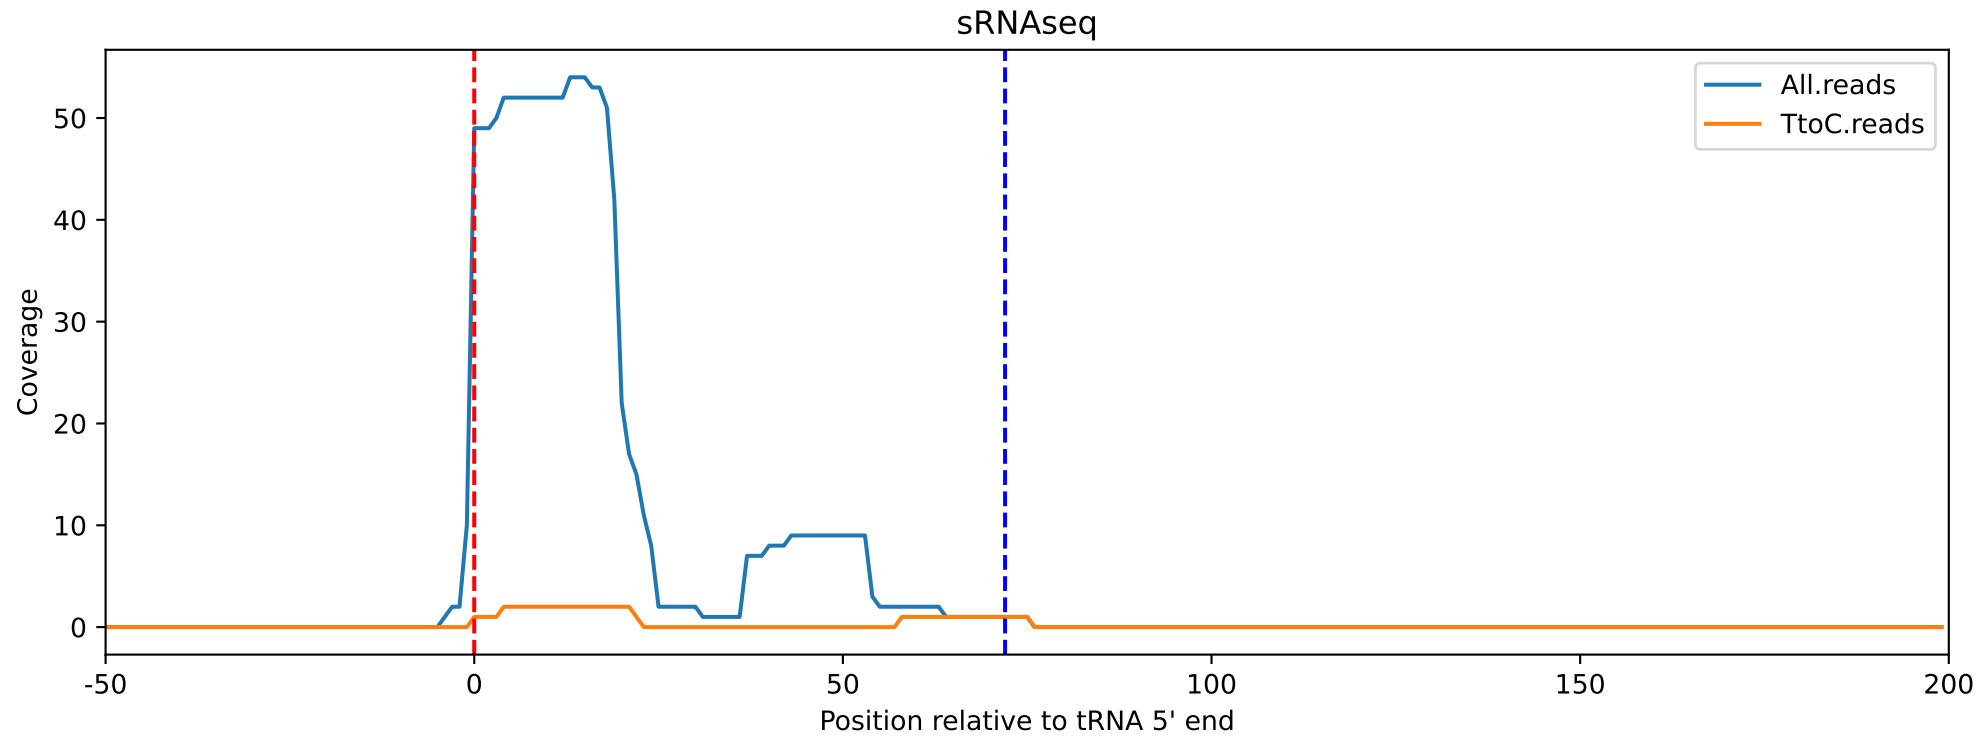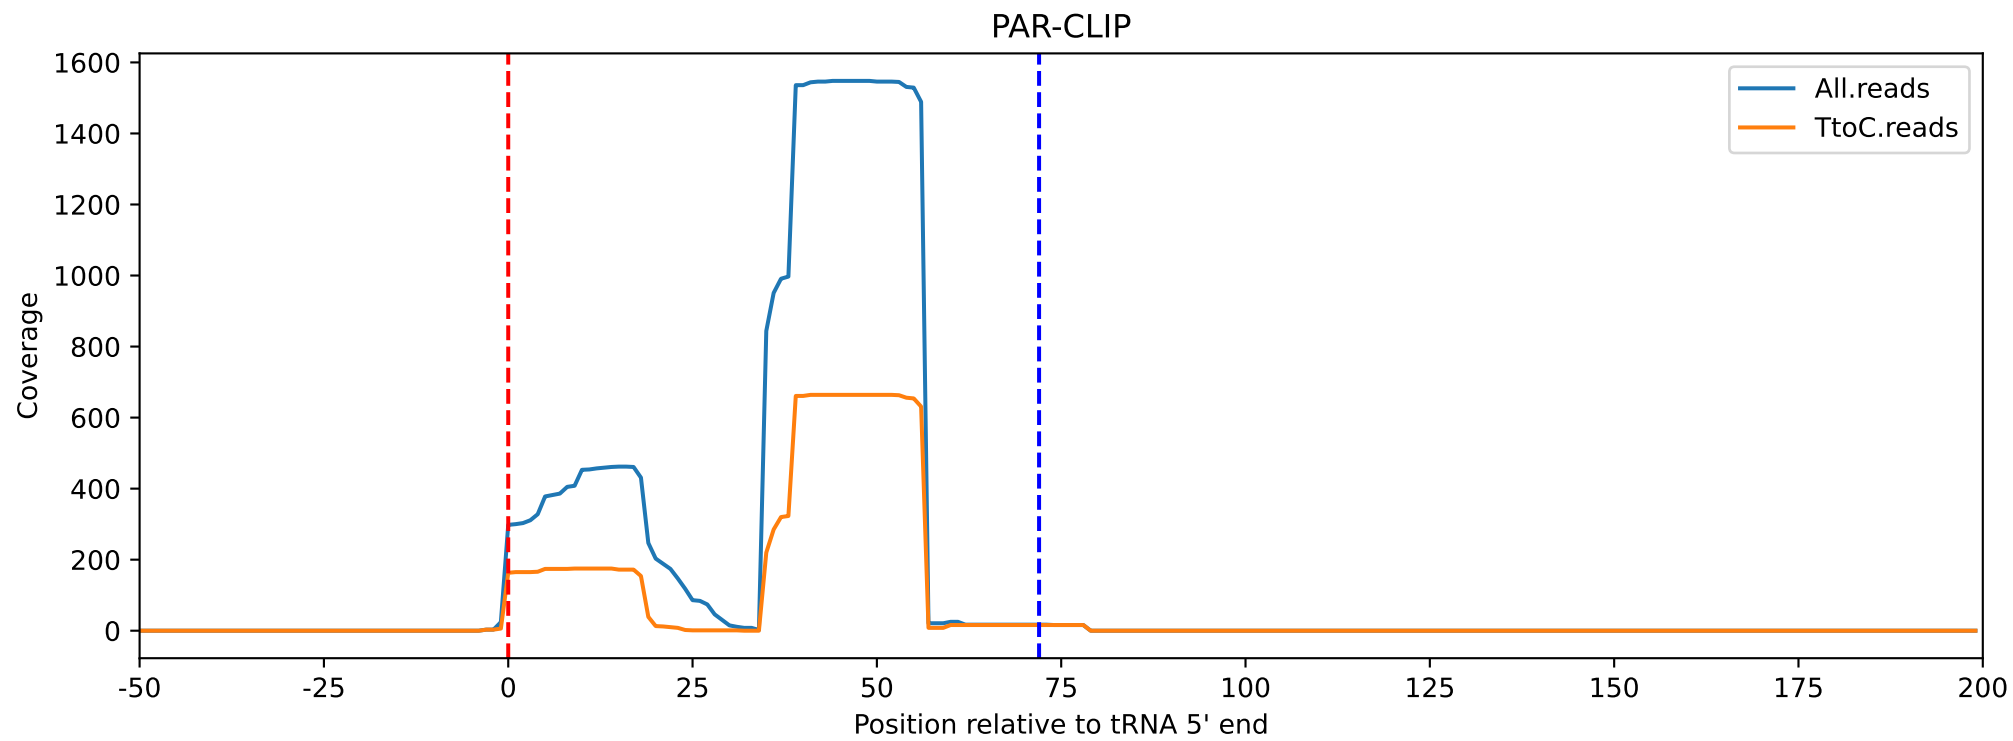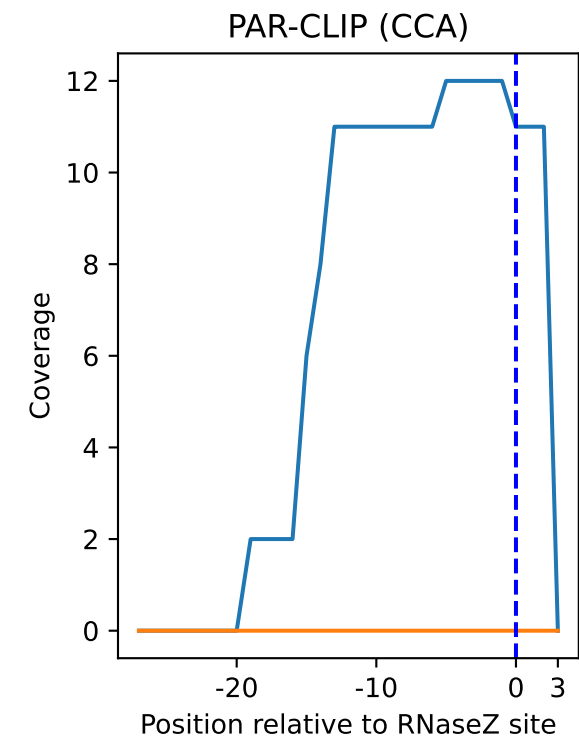

# tRNA-Ala-AGC-1-1

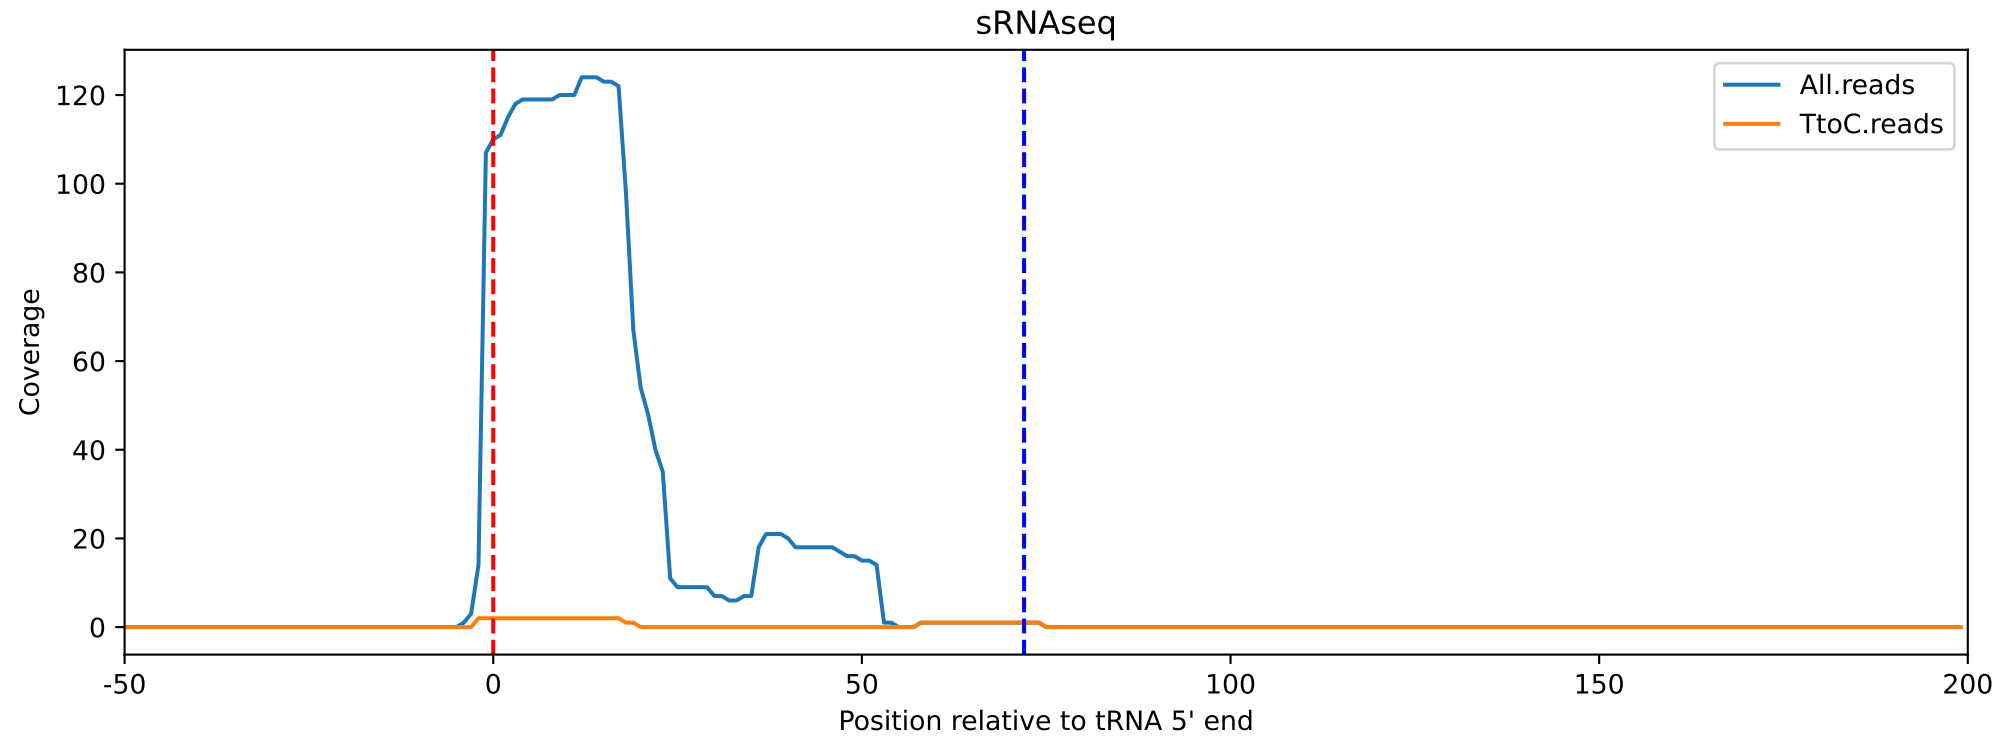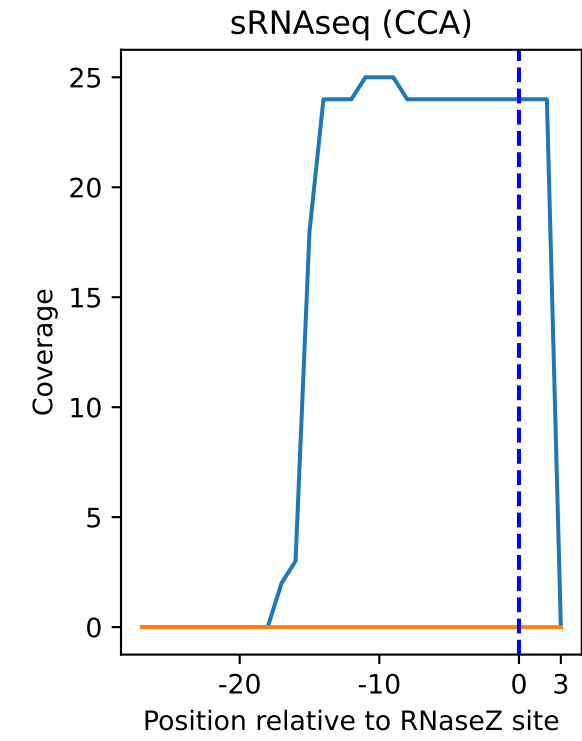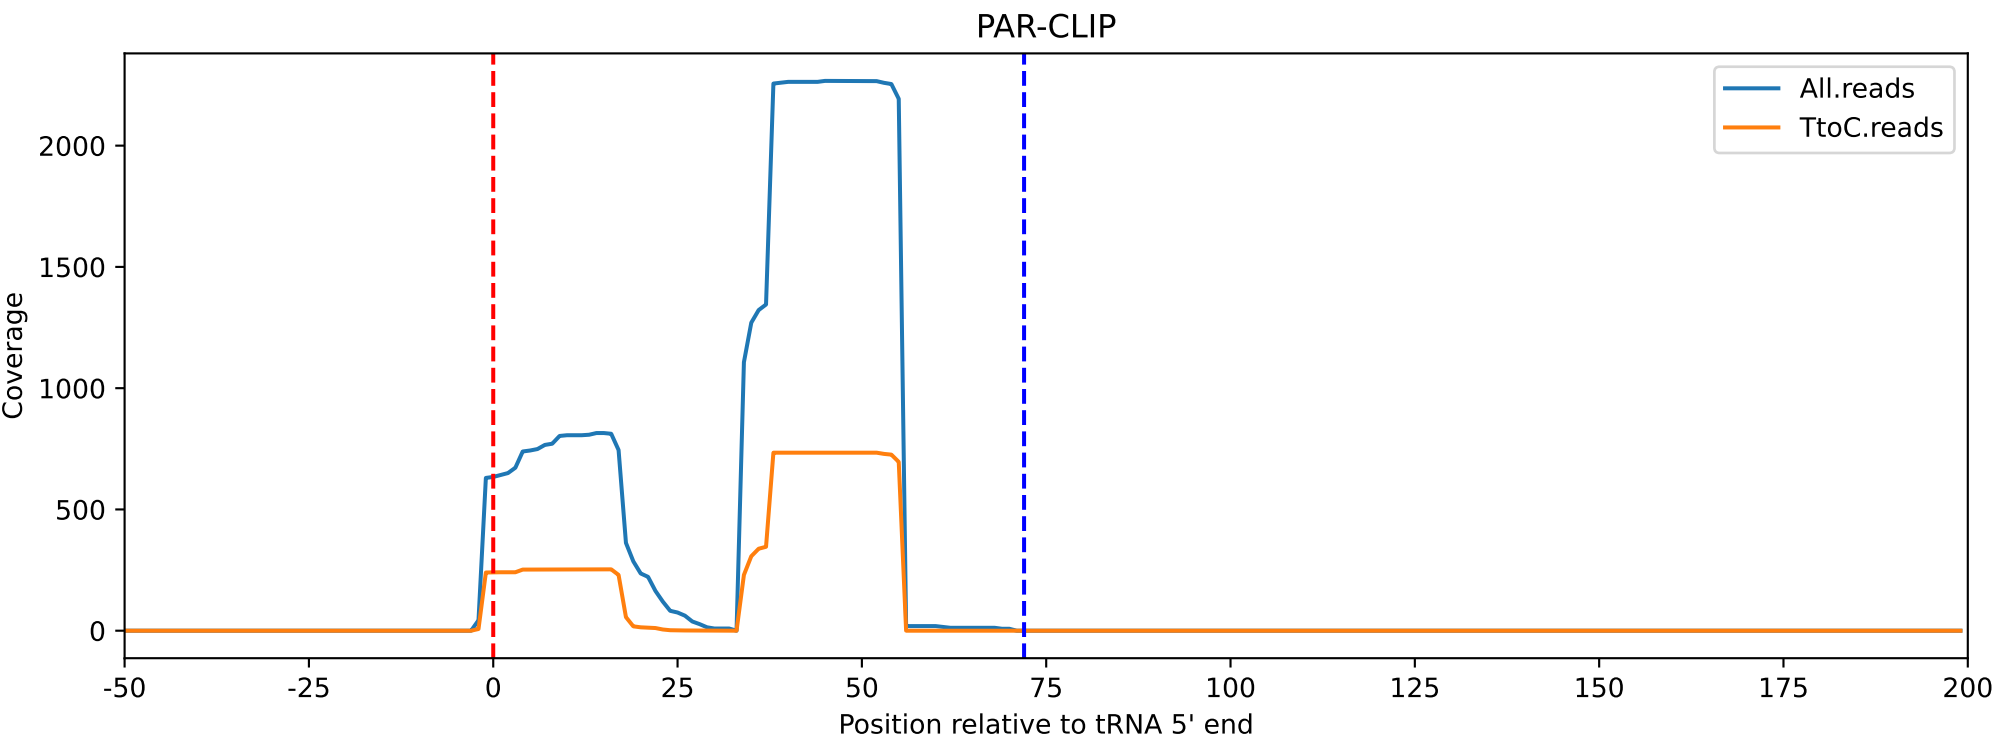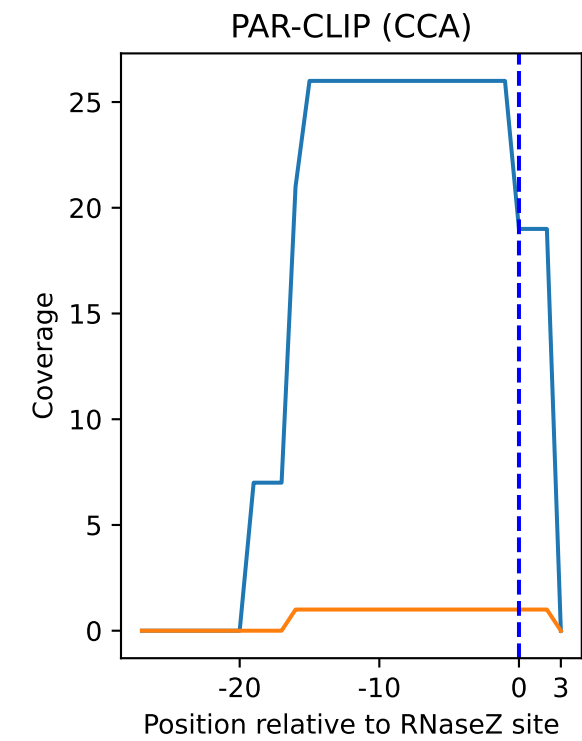

# tRNA-Thr-TGT-2-3

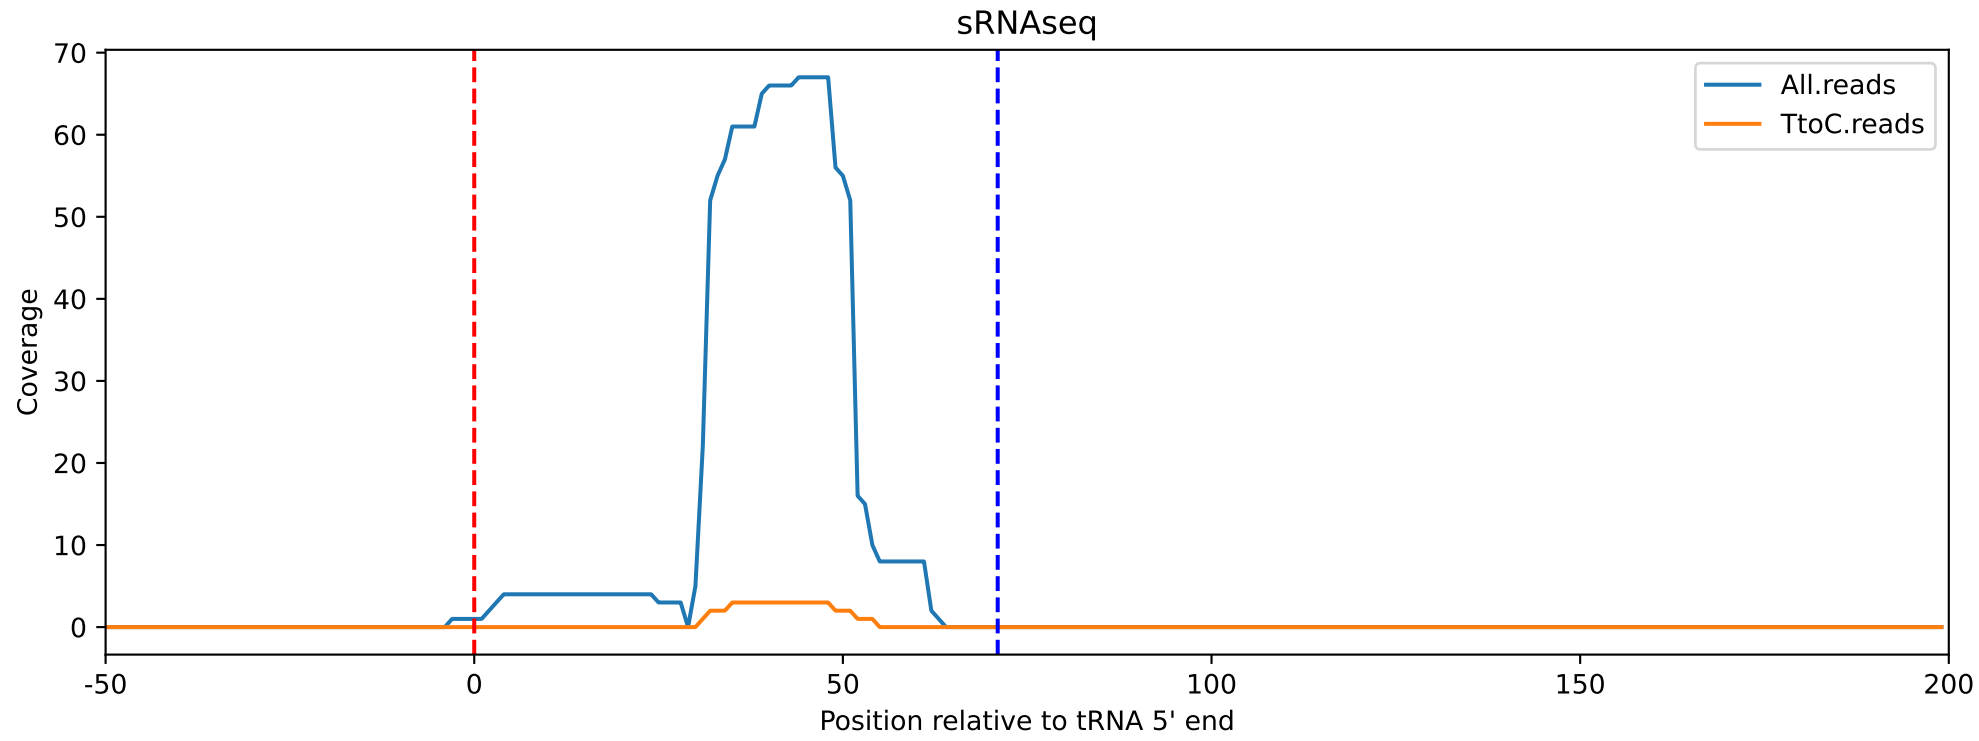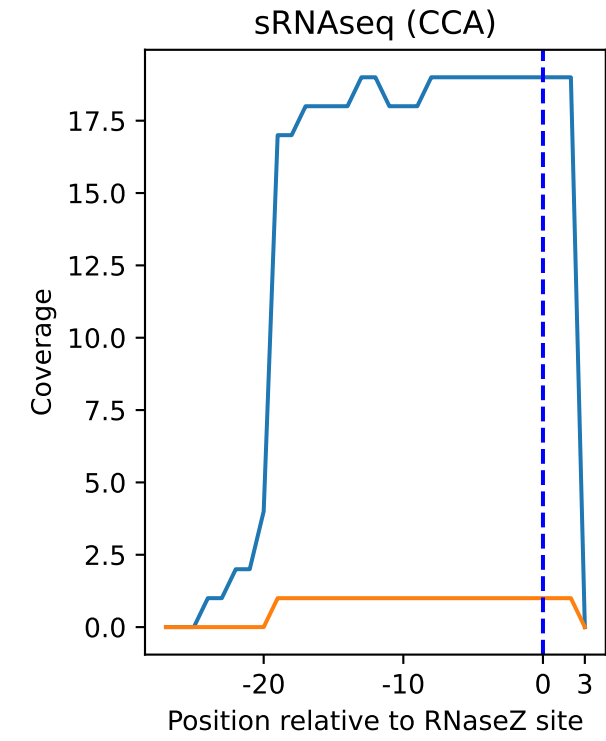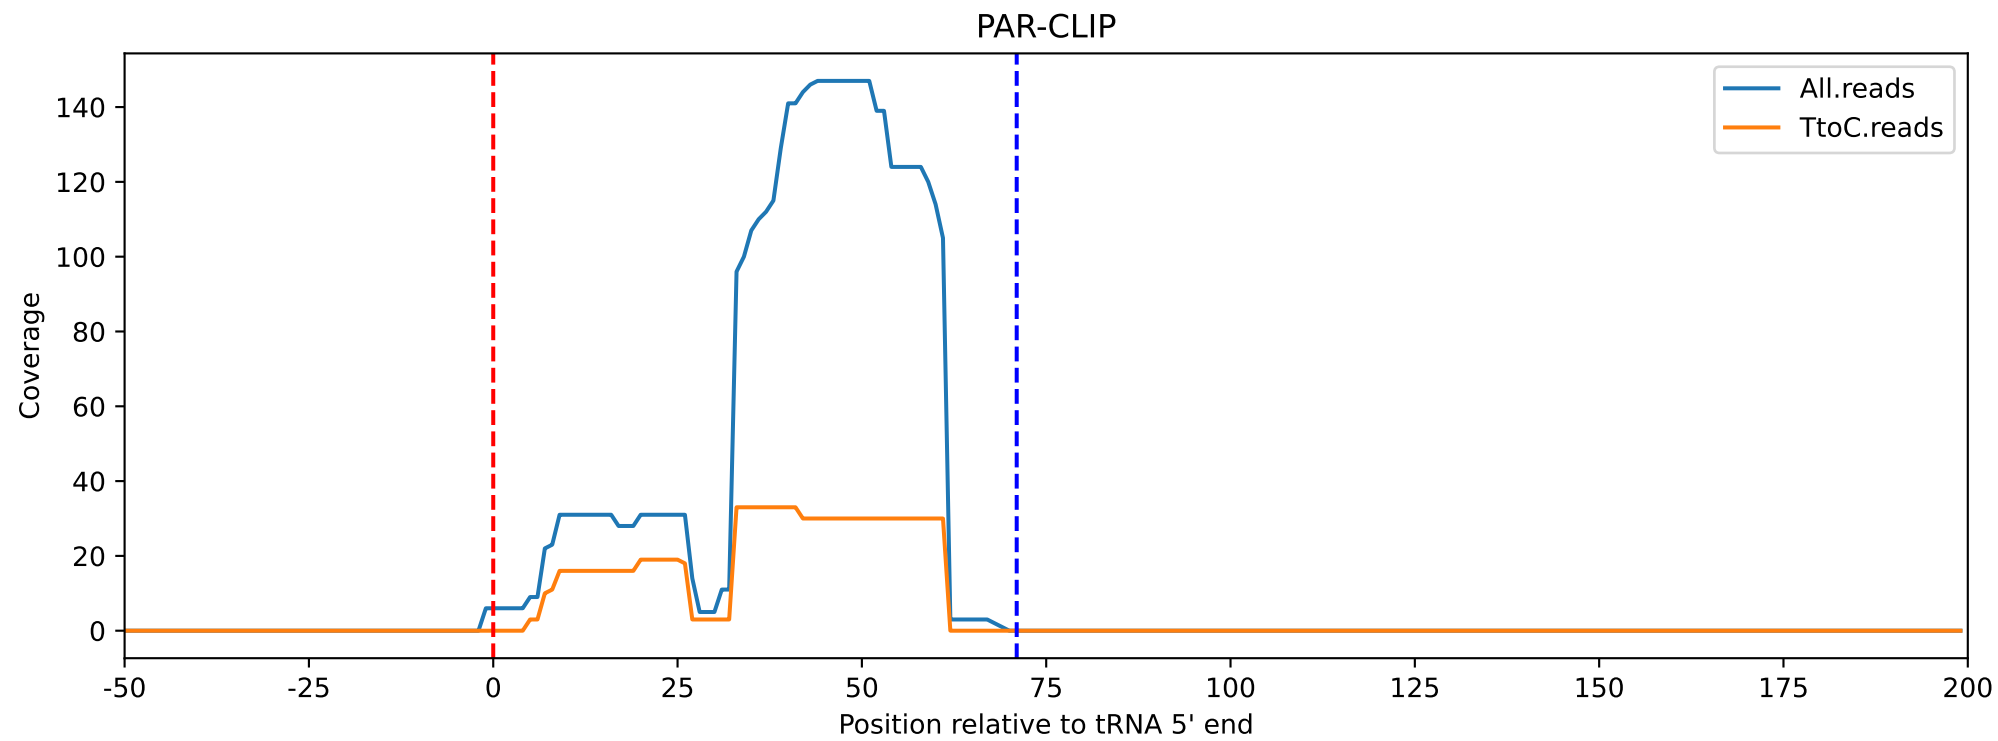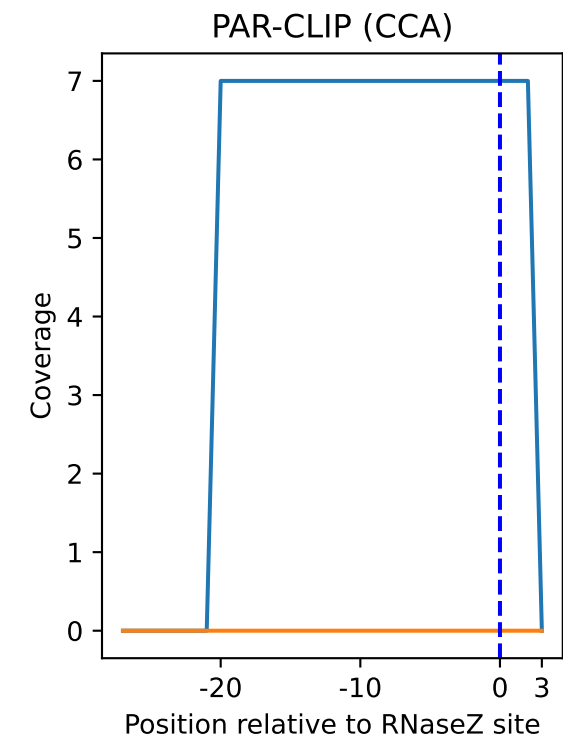

# tRNA-Leu-CAG-1-1

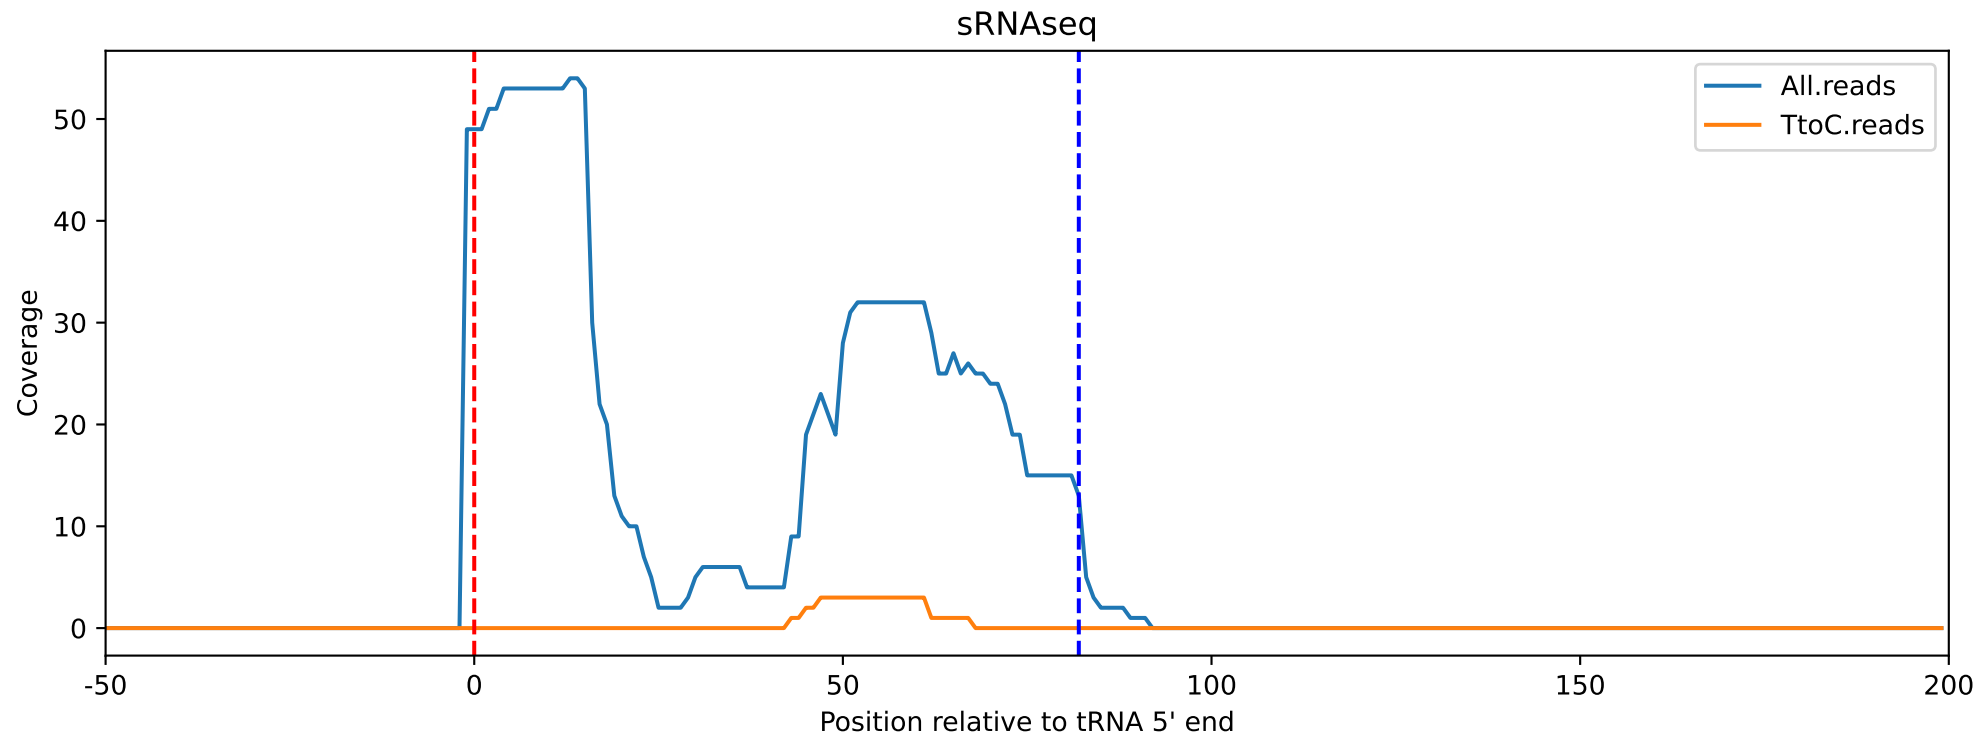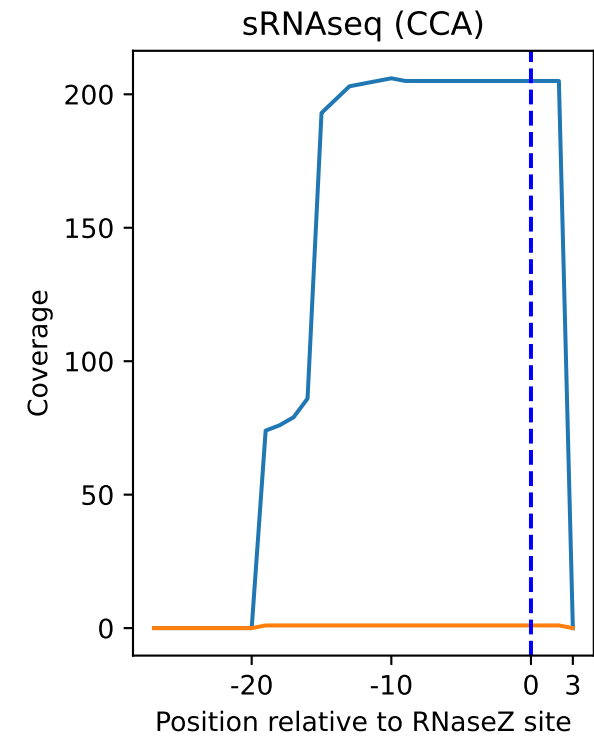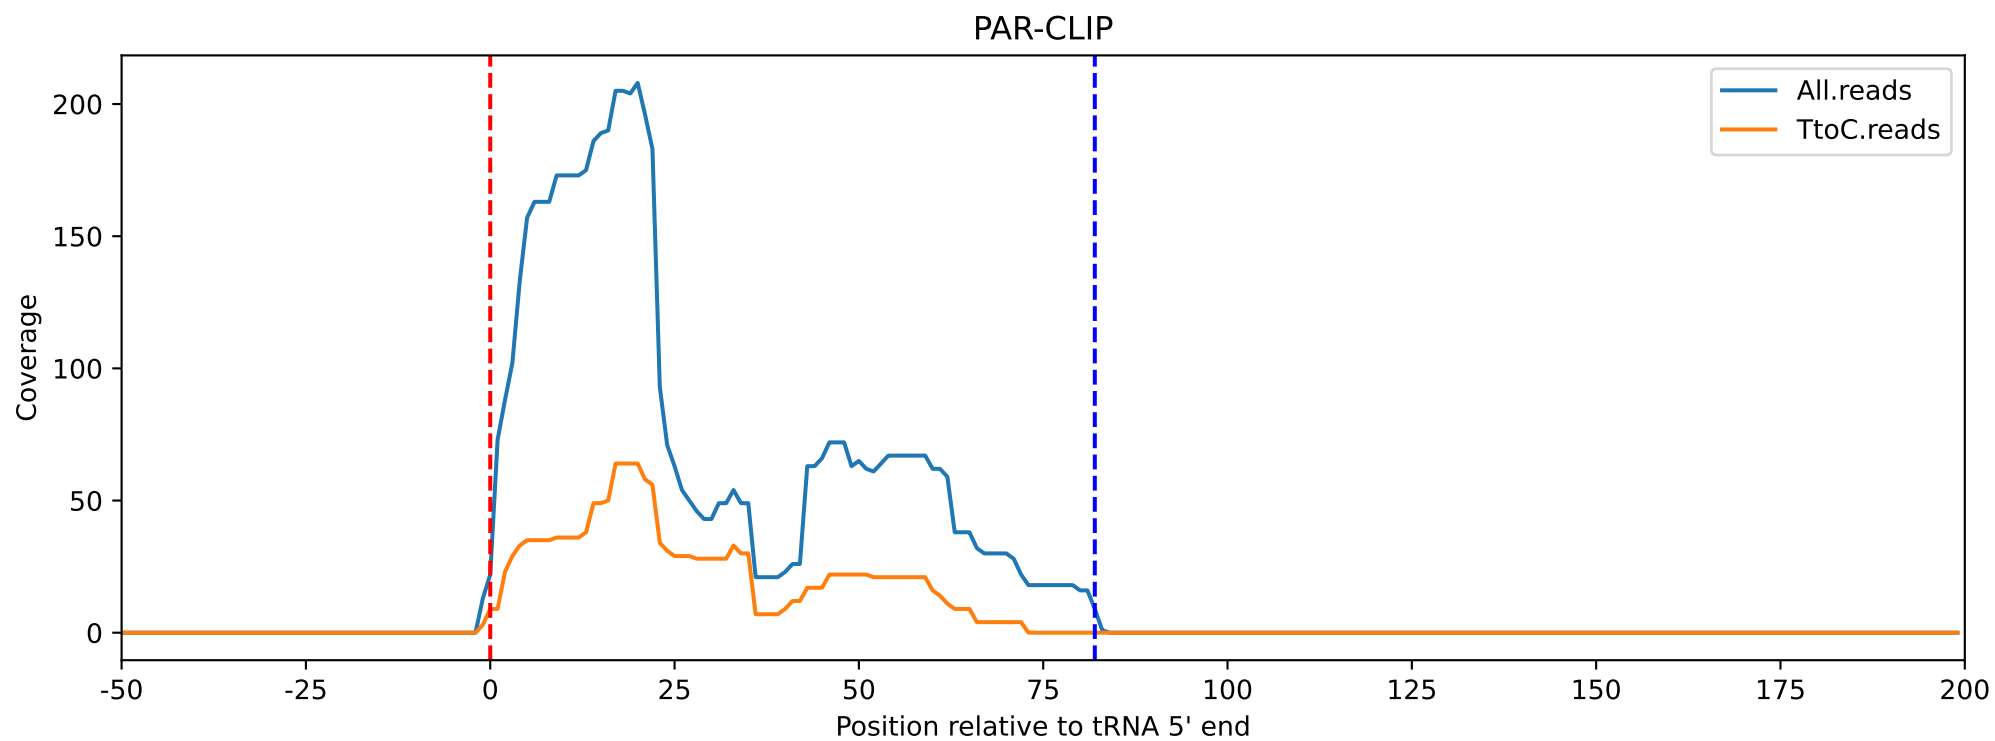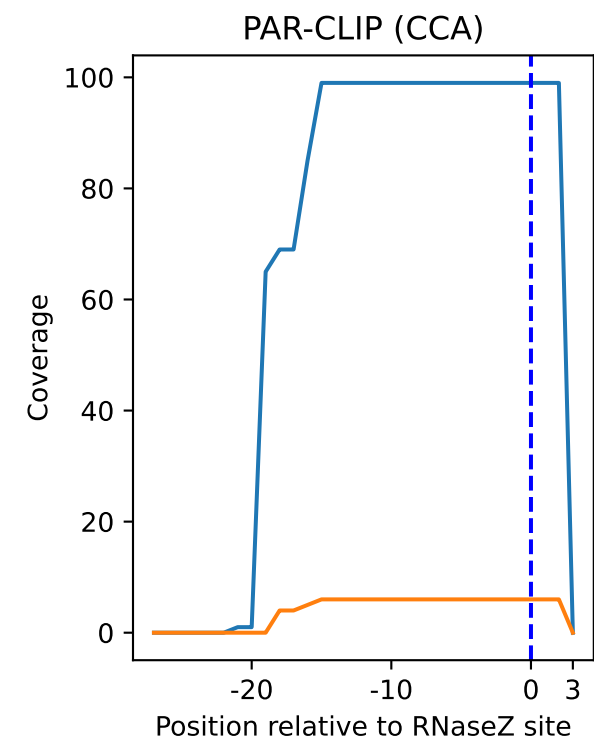



# tRNA-iMet-CAT-2-1

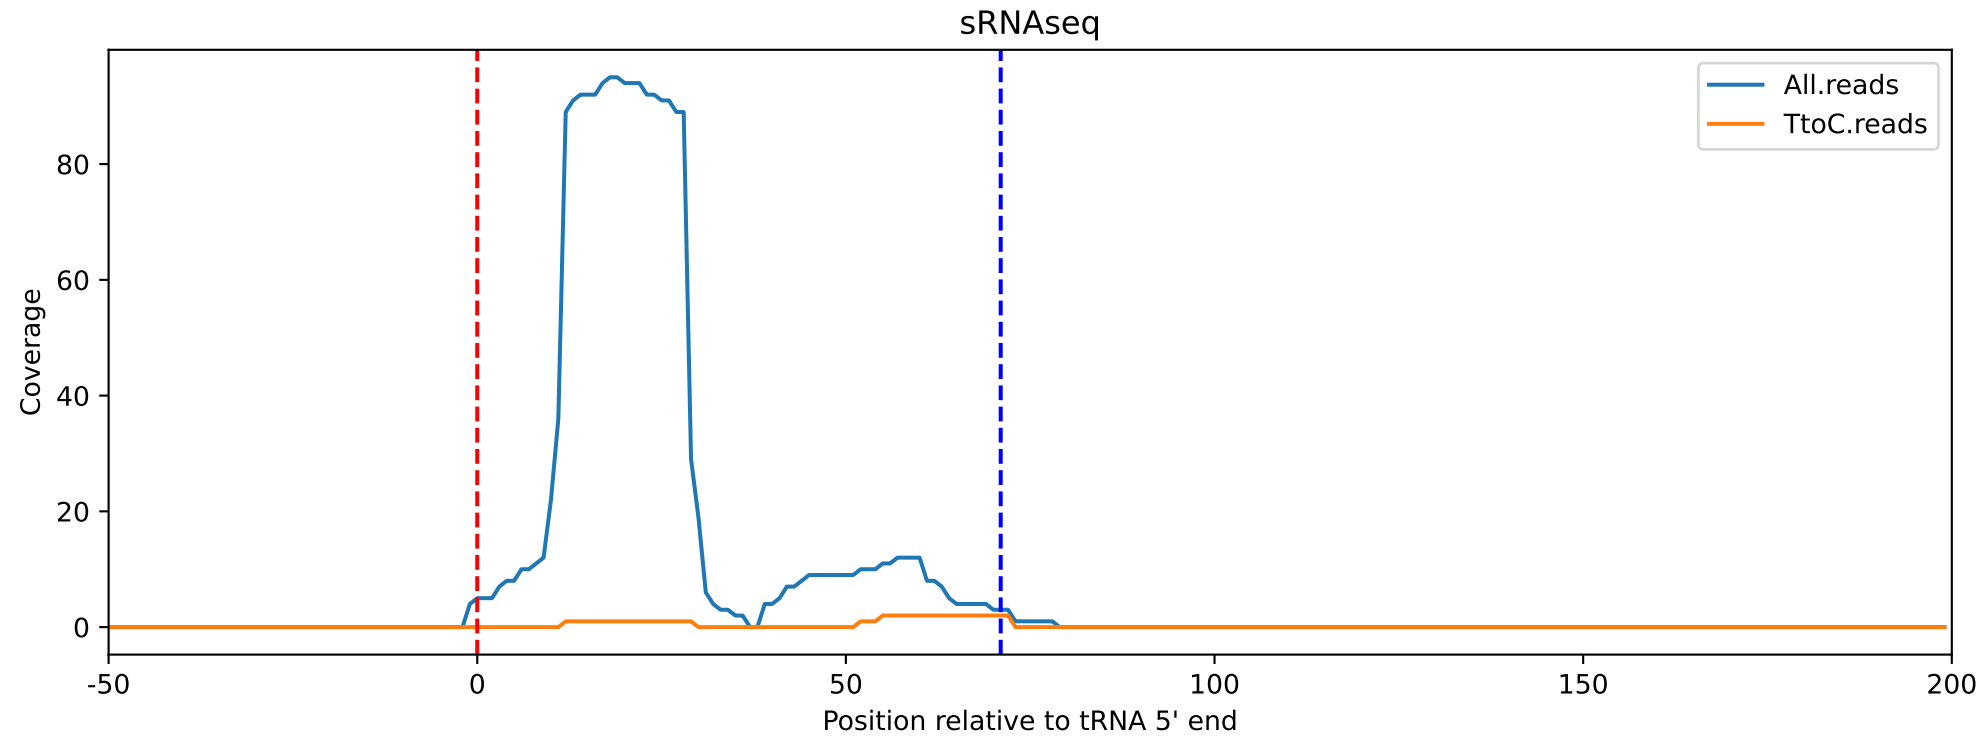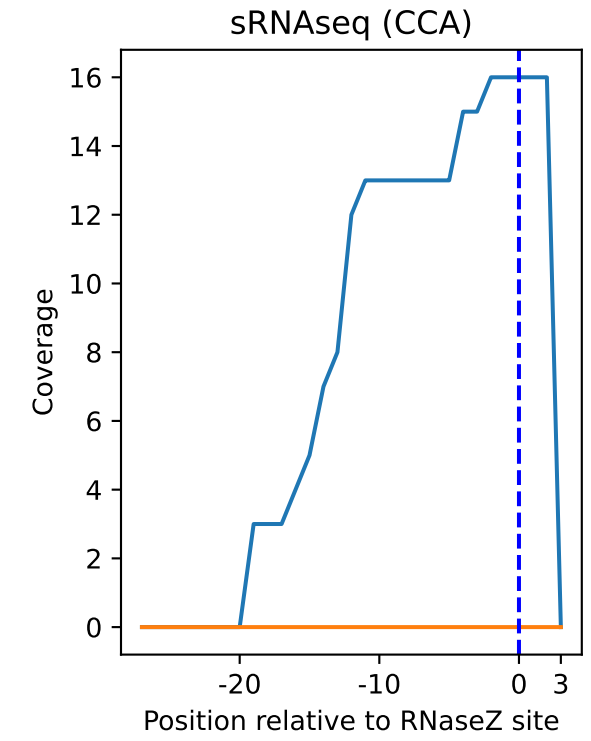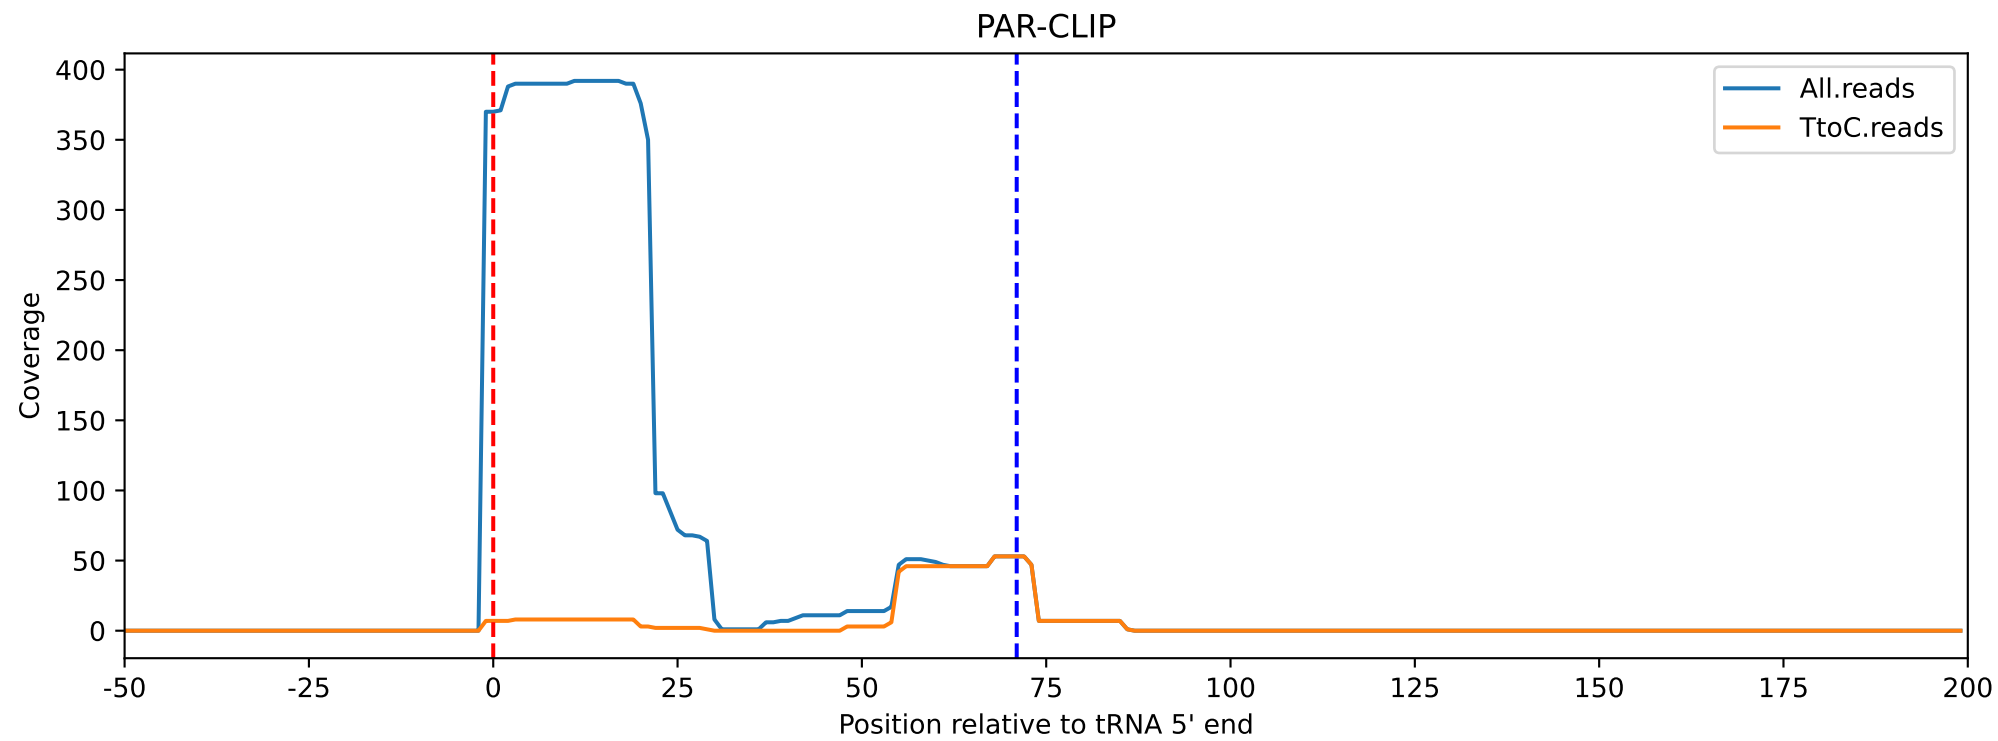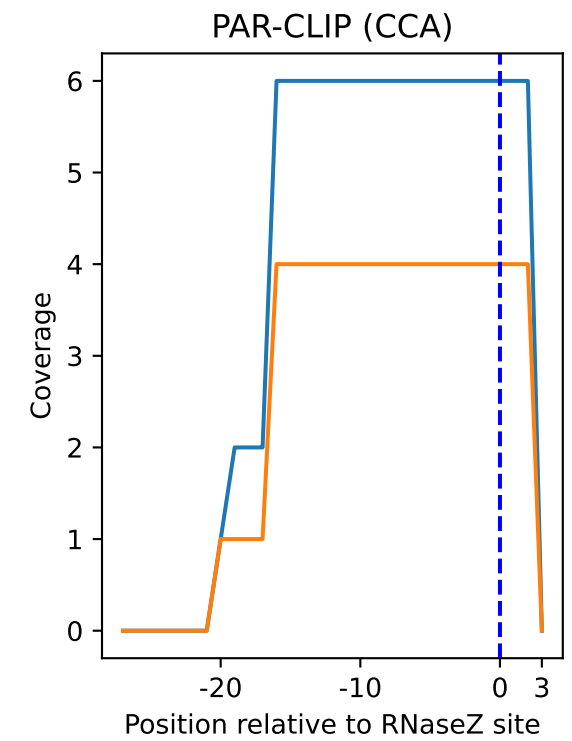

# tRNA-Thr-CGT-1-3

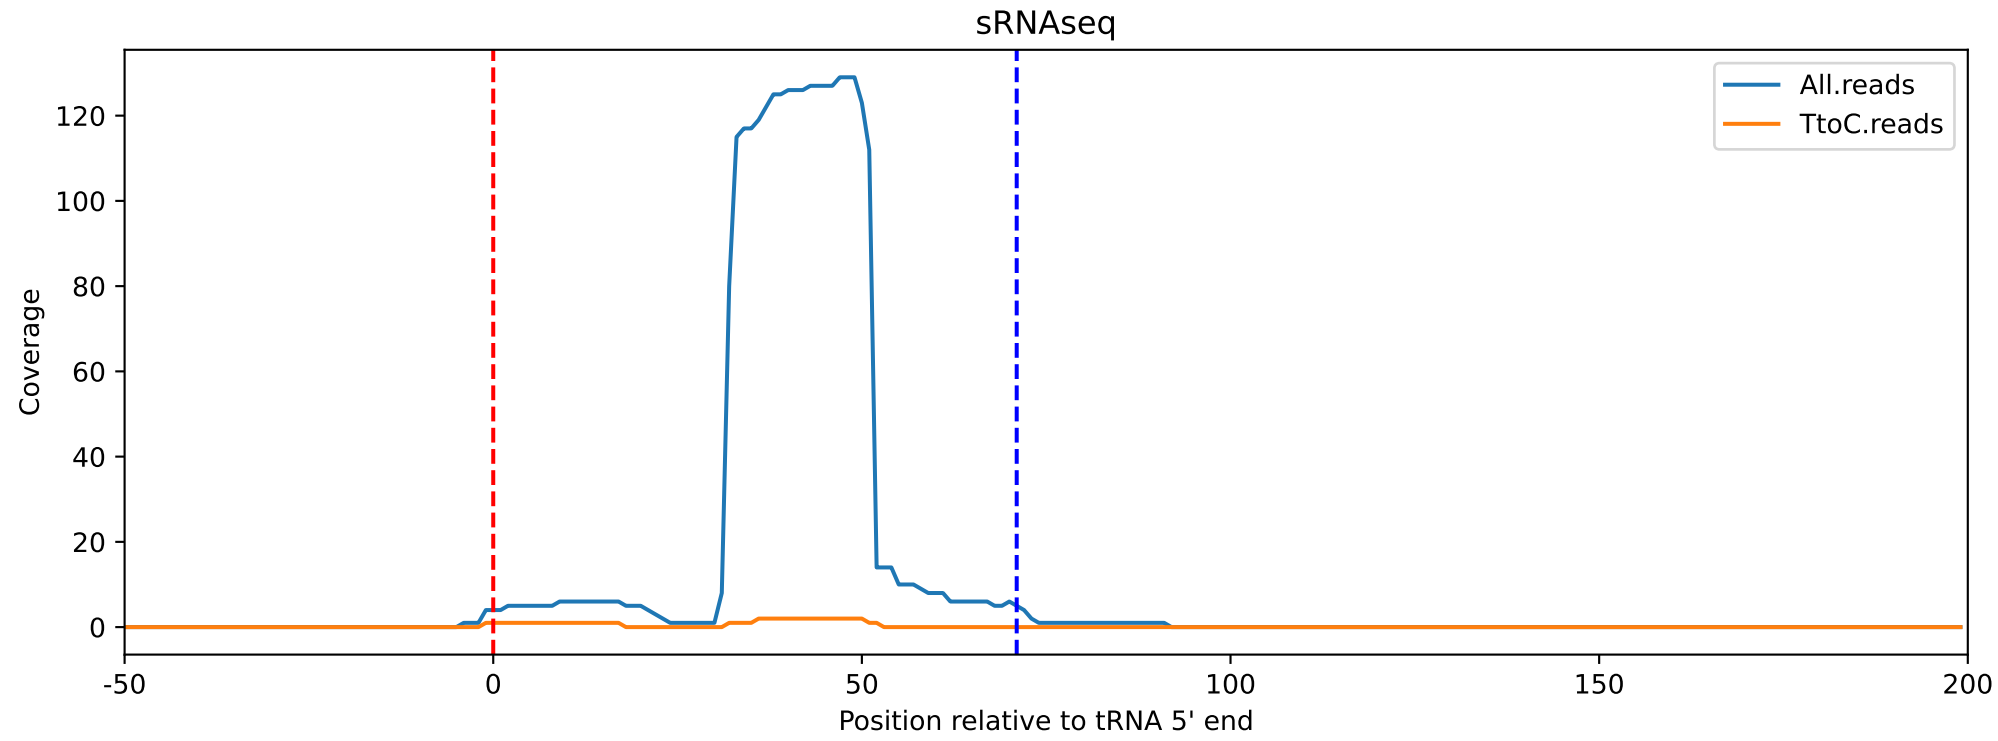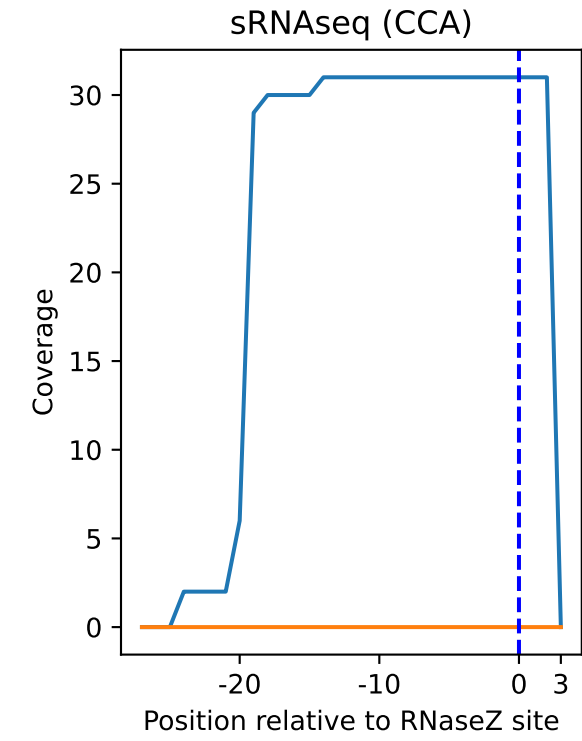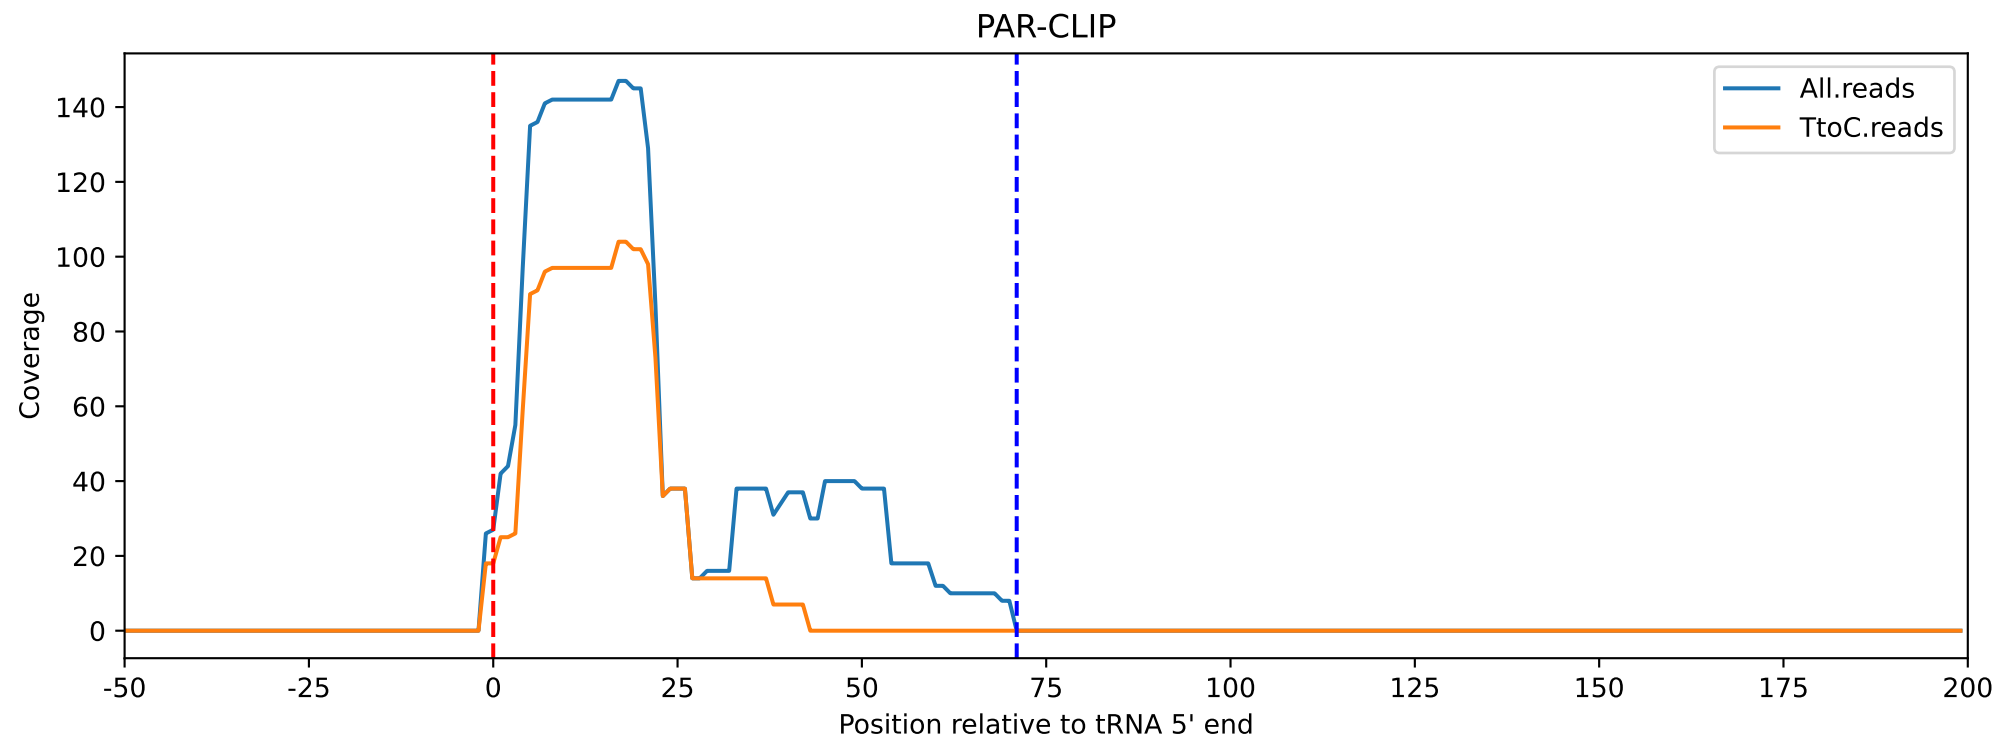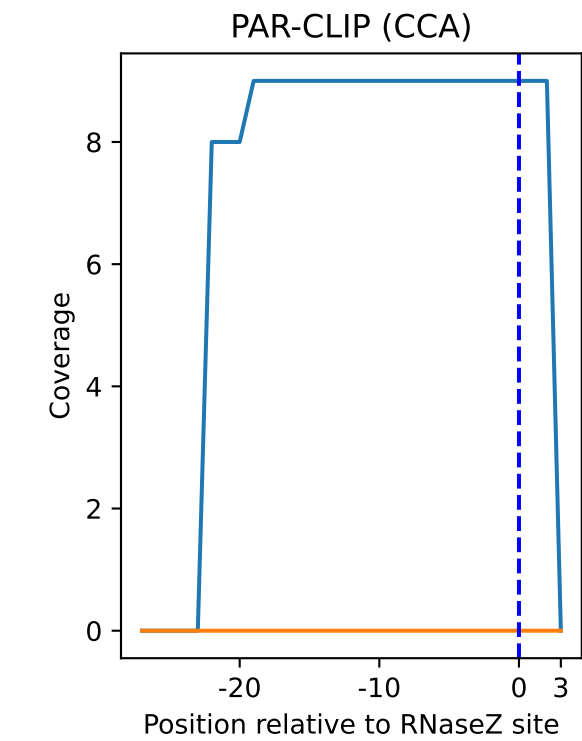

# tRNA-Leu-CAG-1-8

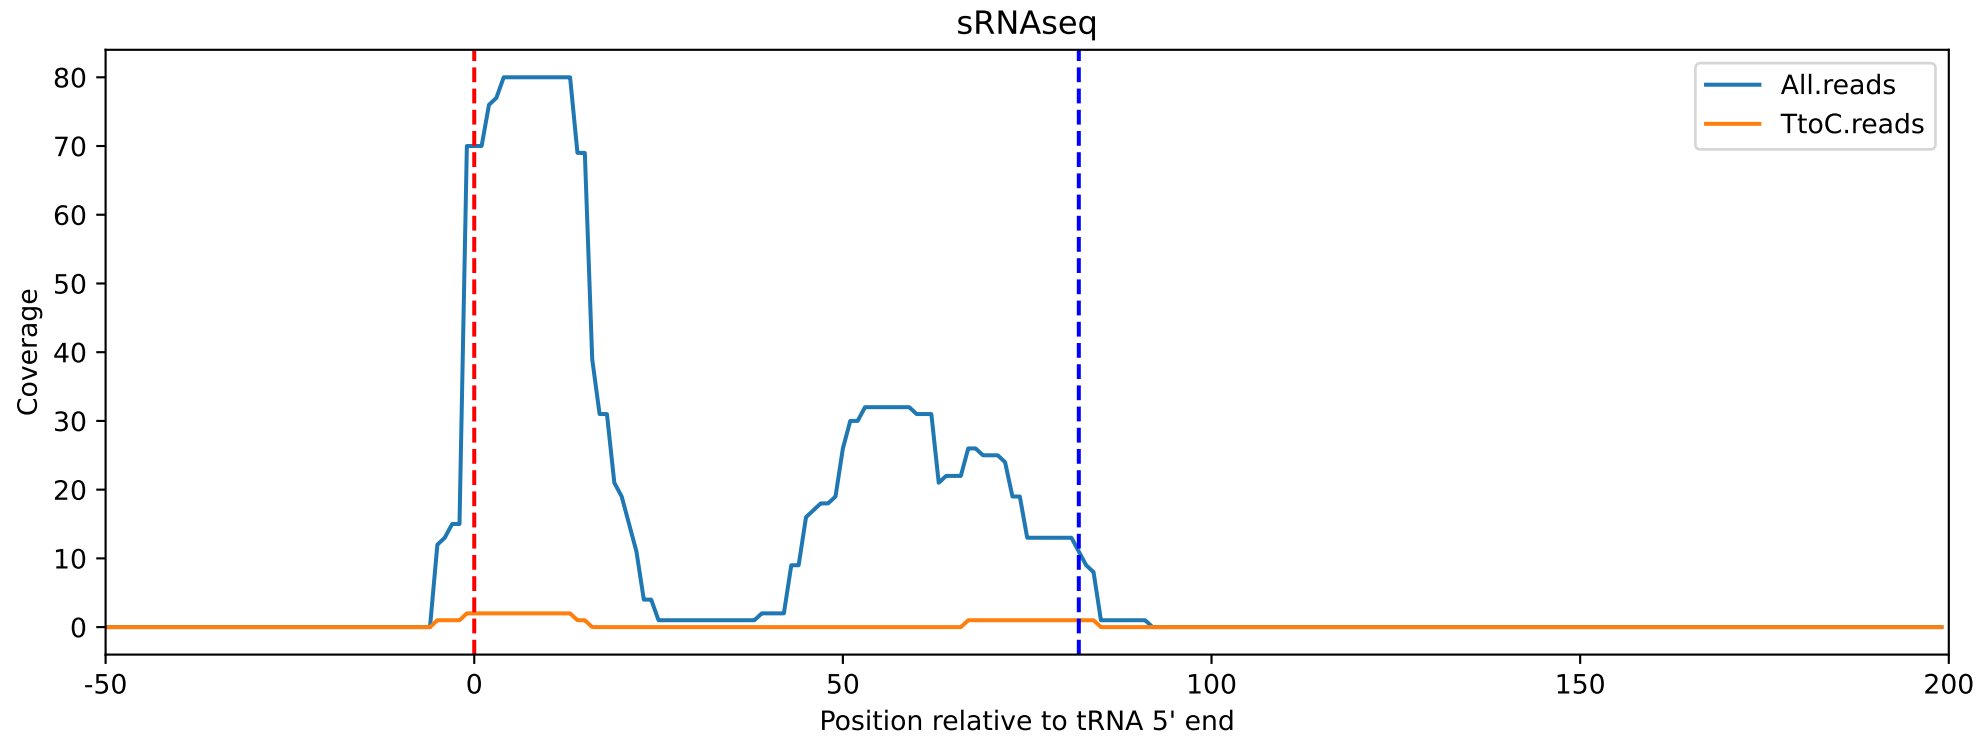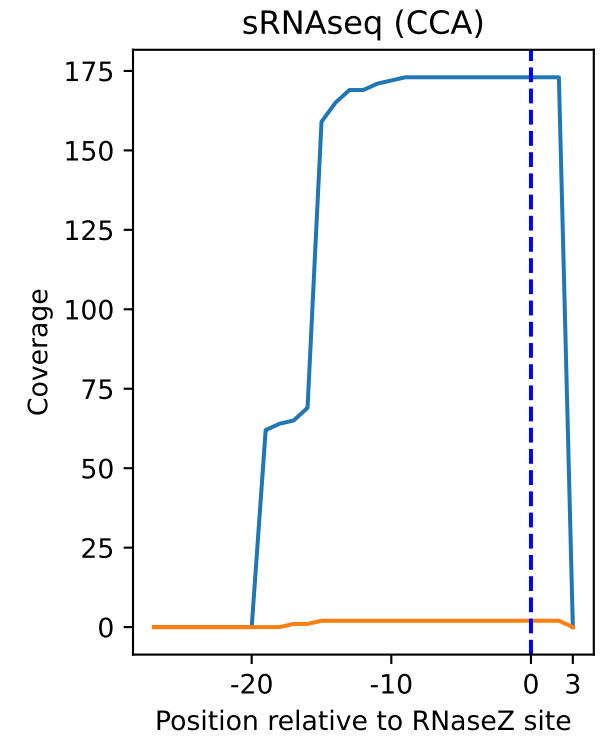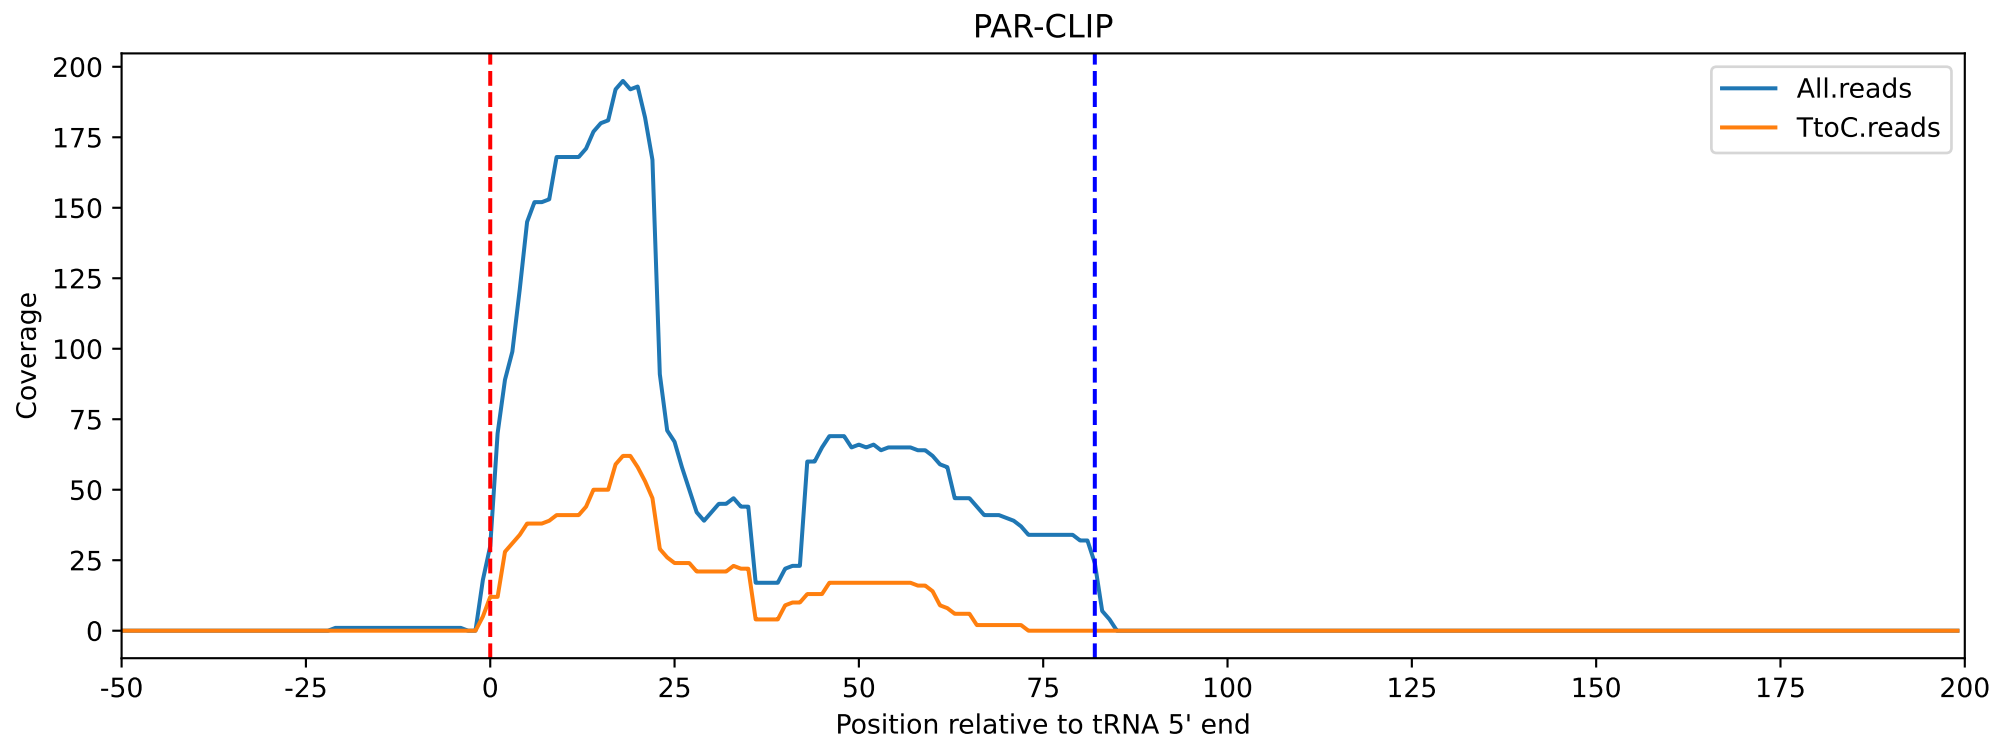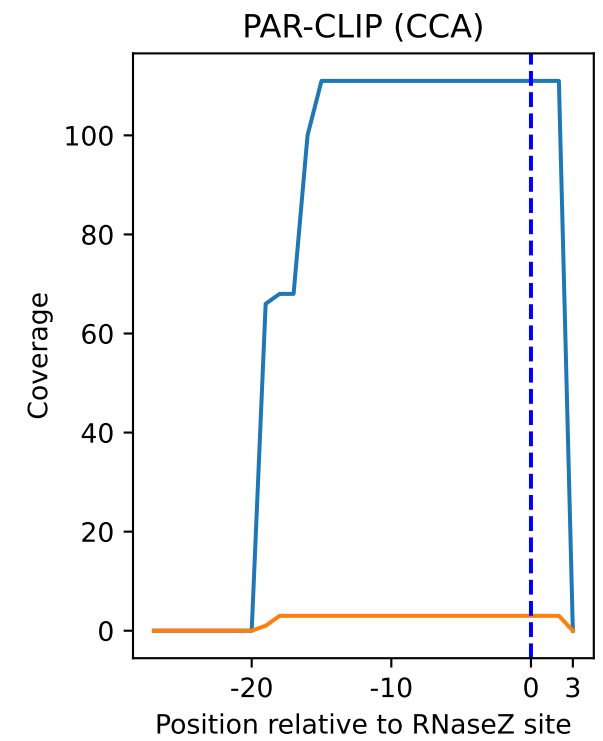

# tRNA-Phe-GAA-1-2

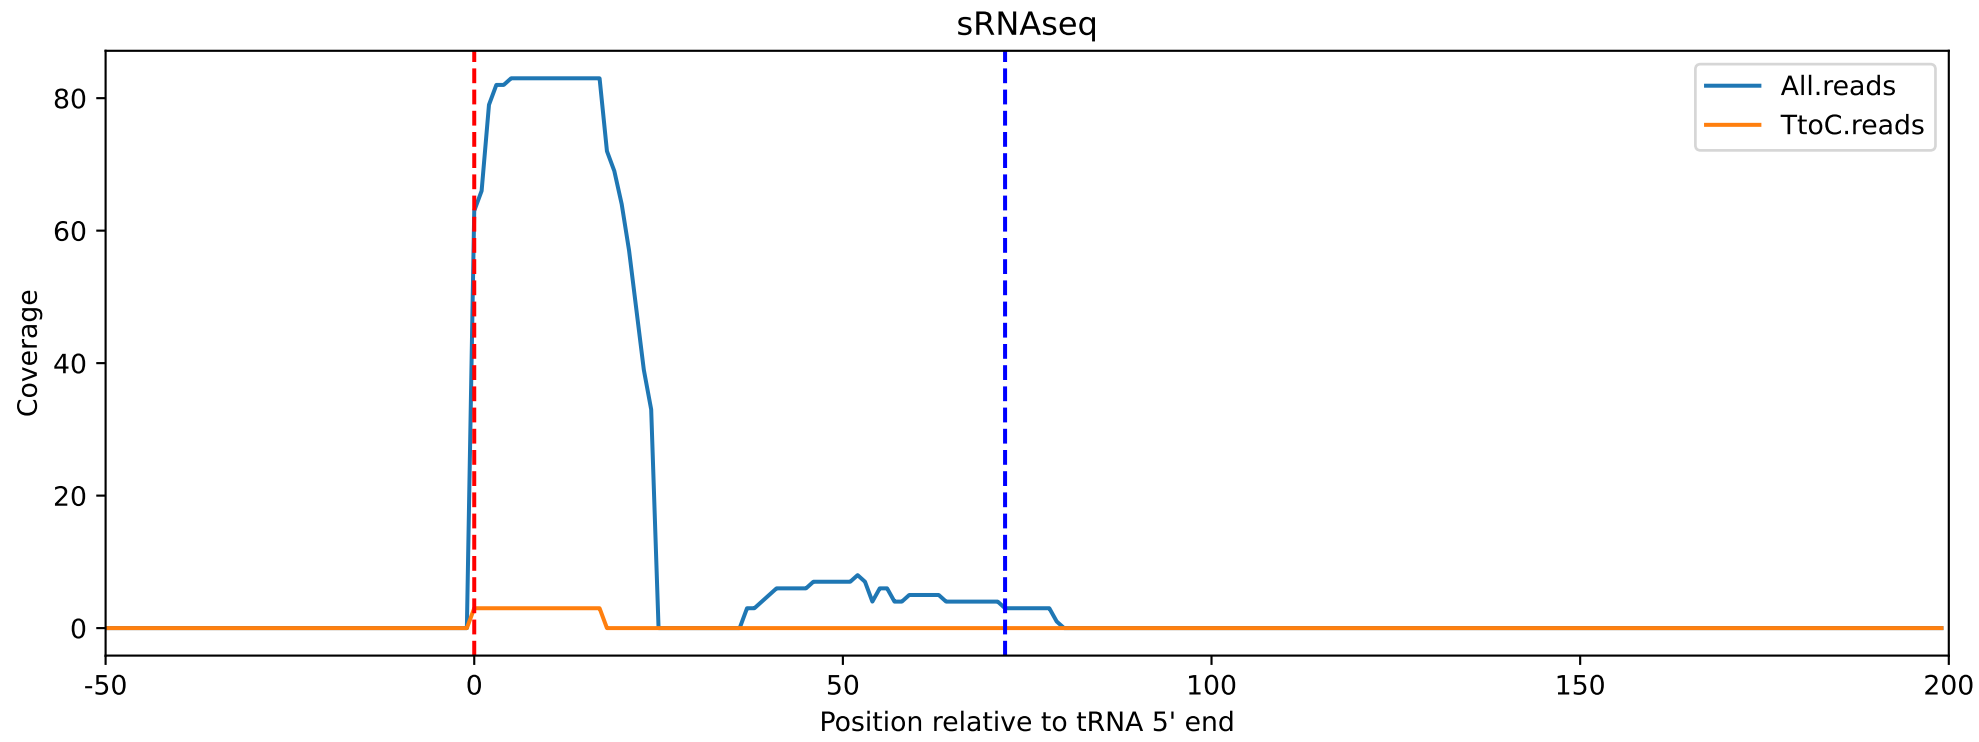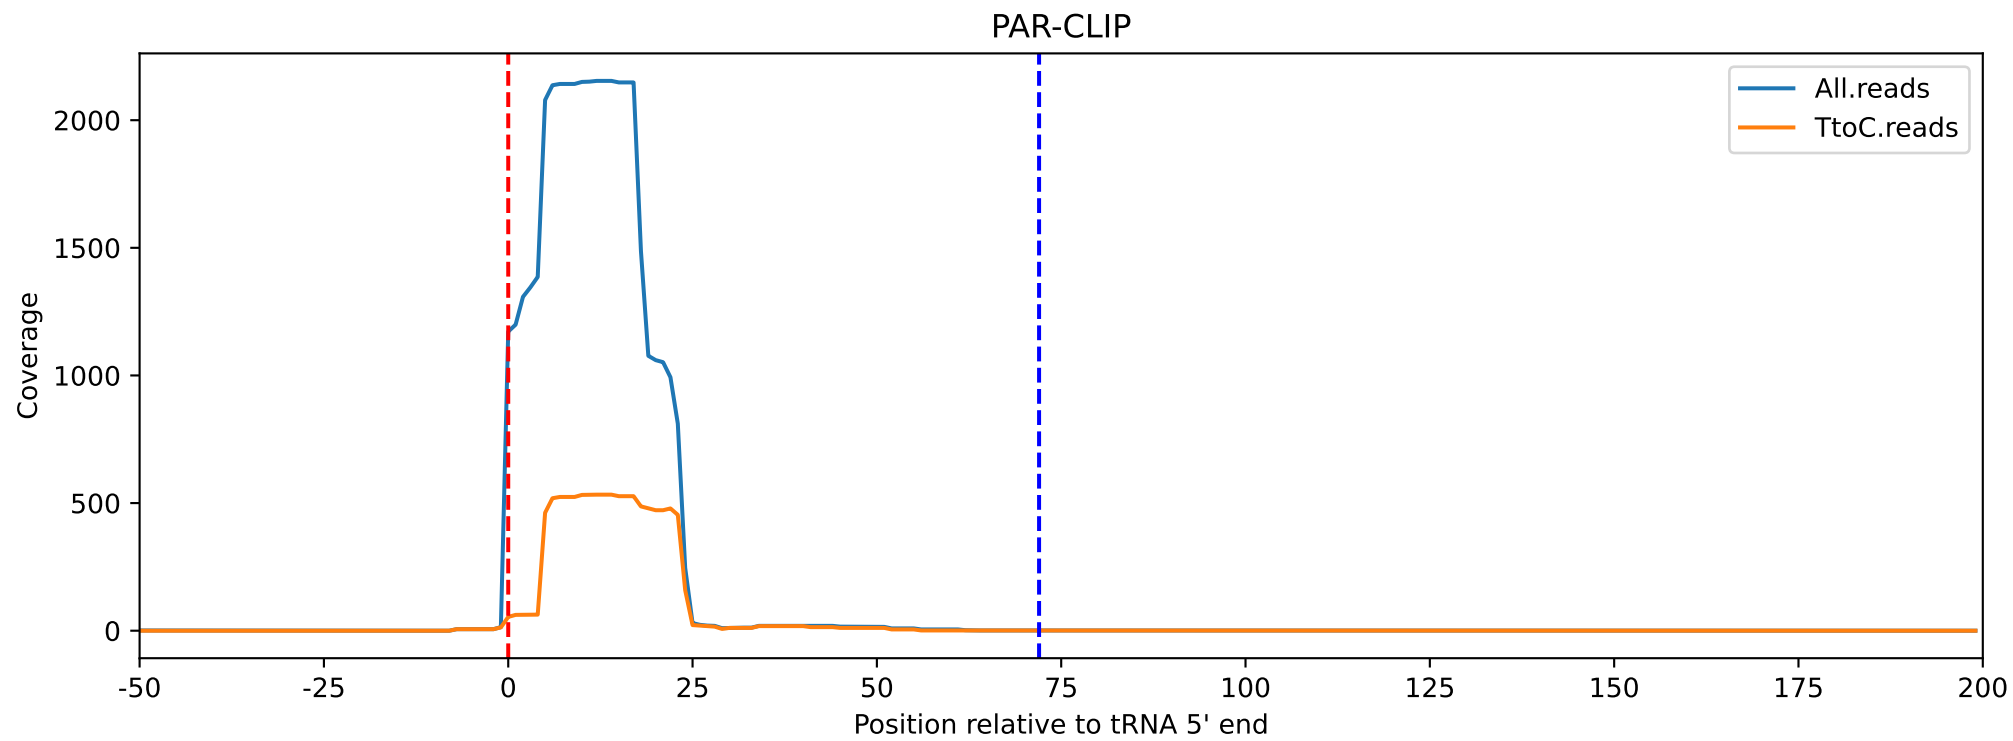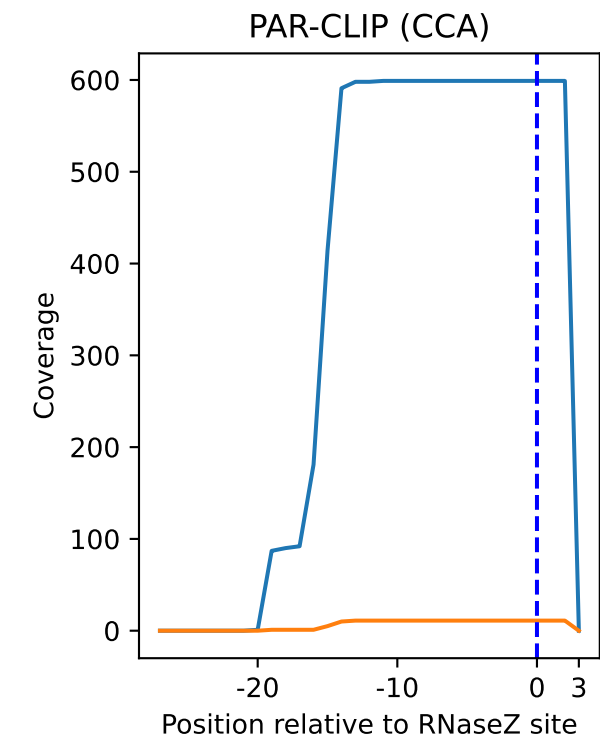

# tRNA-iMet-CAT-1-2

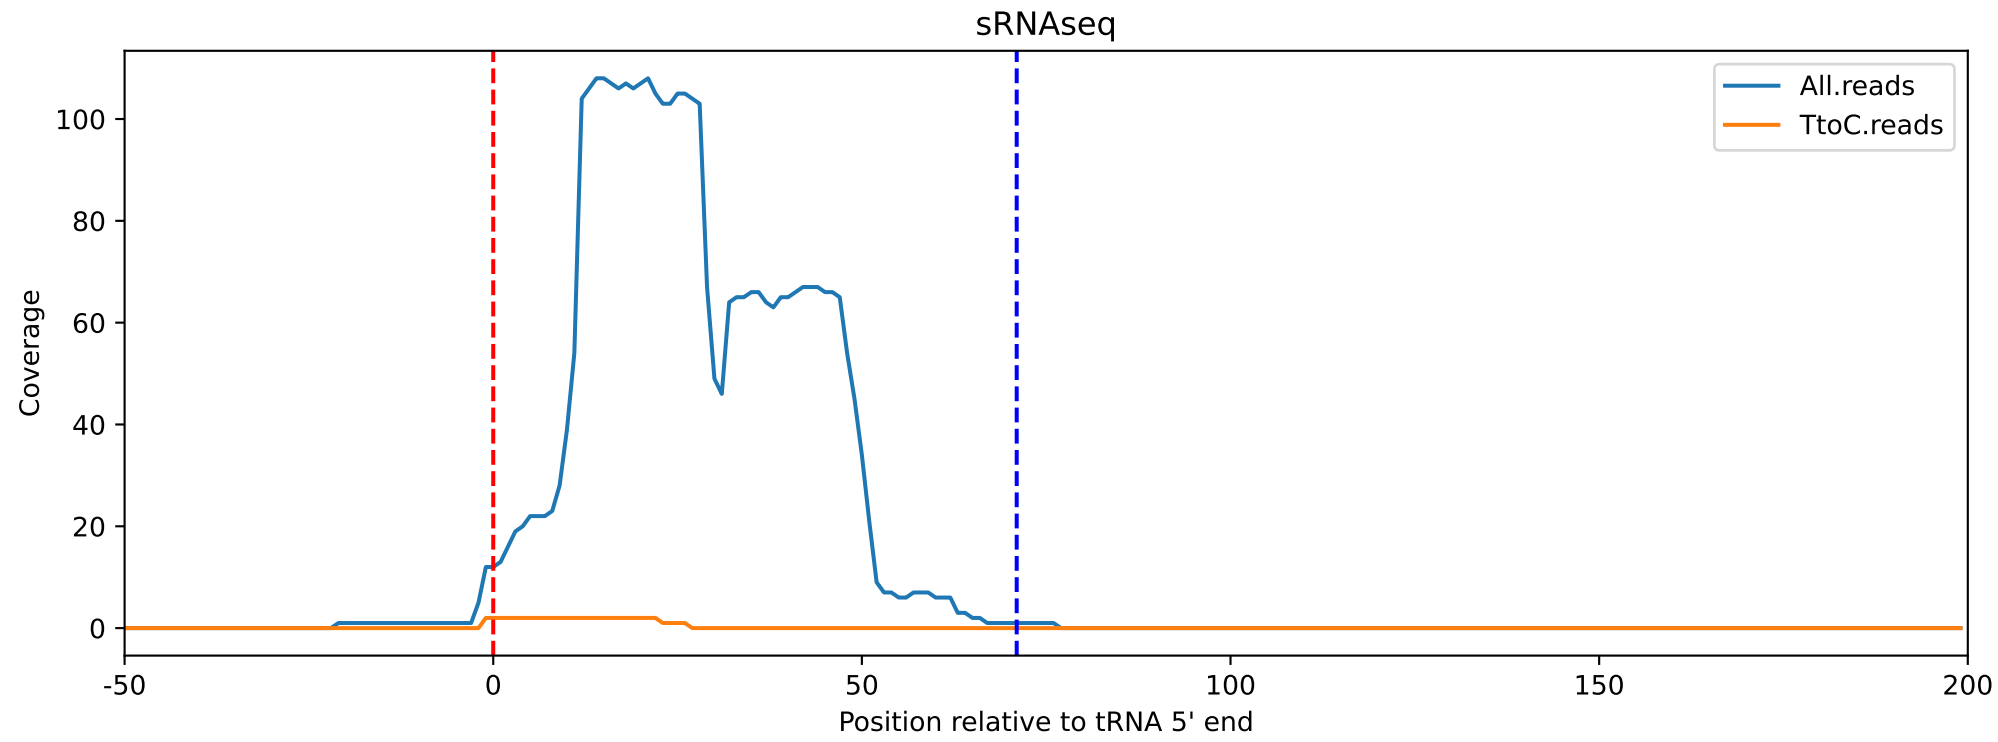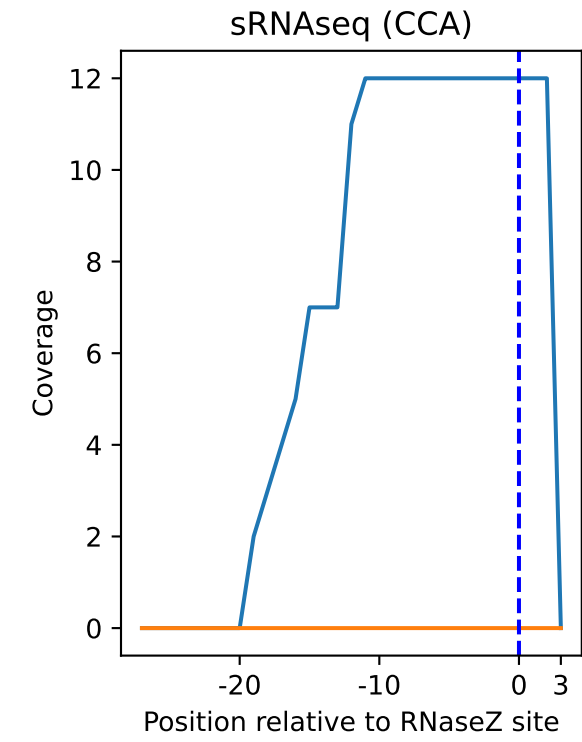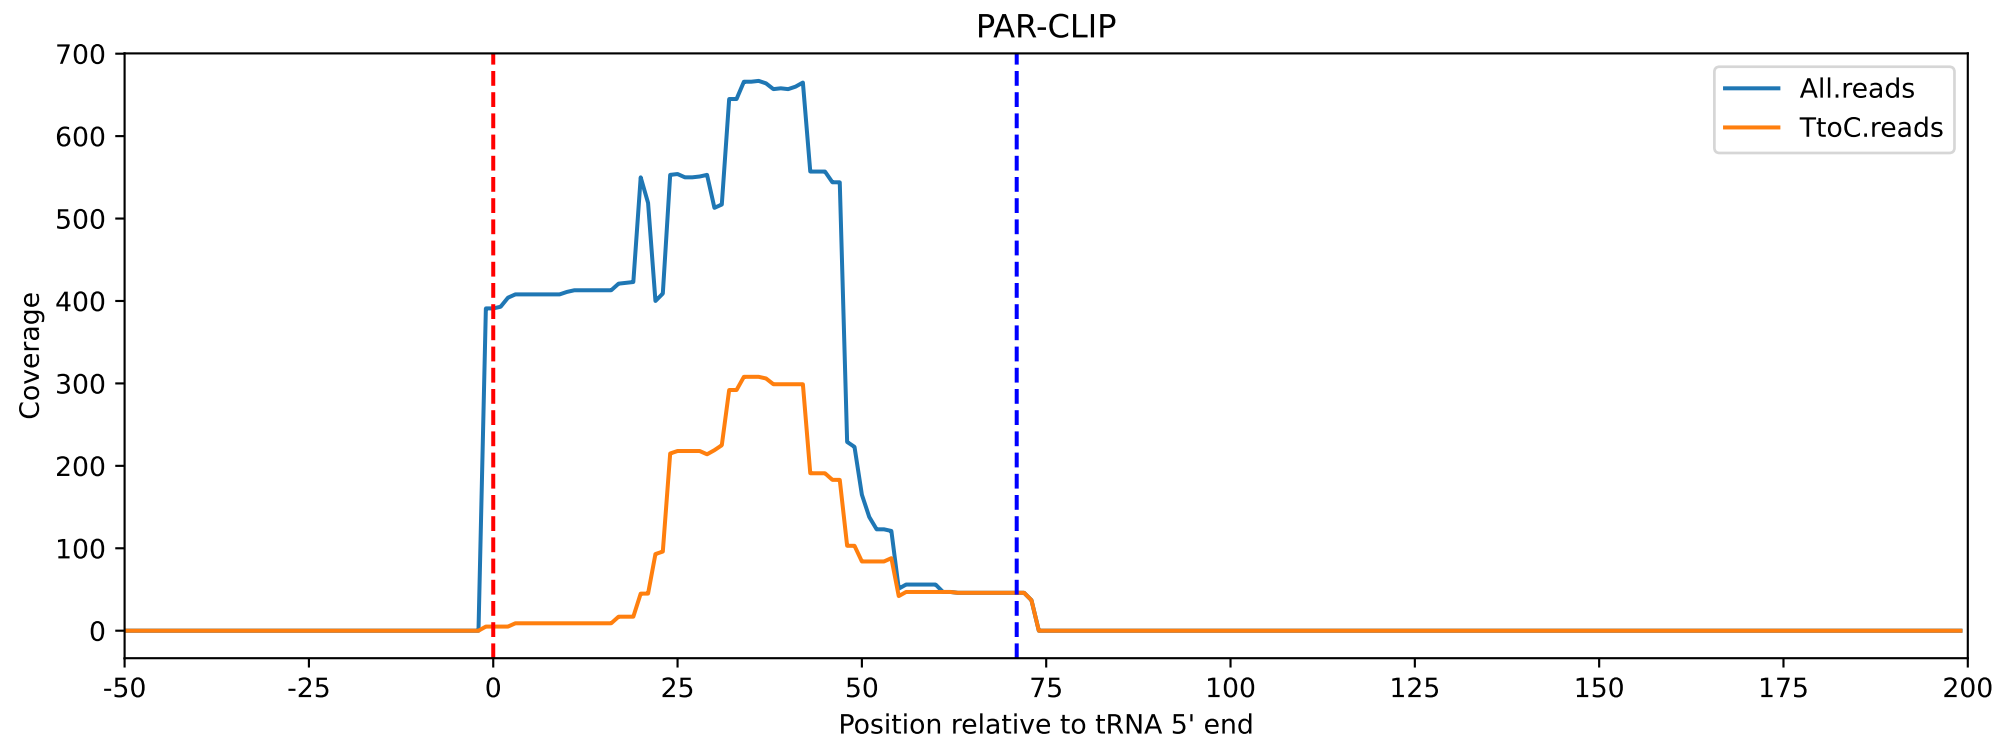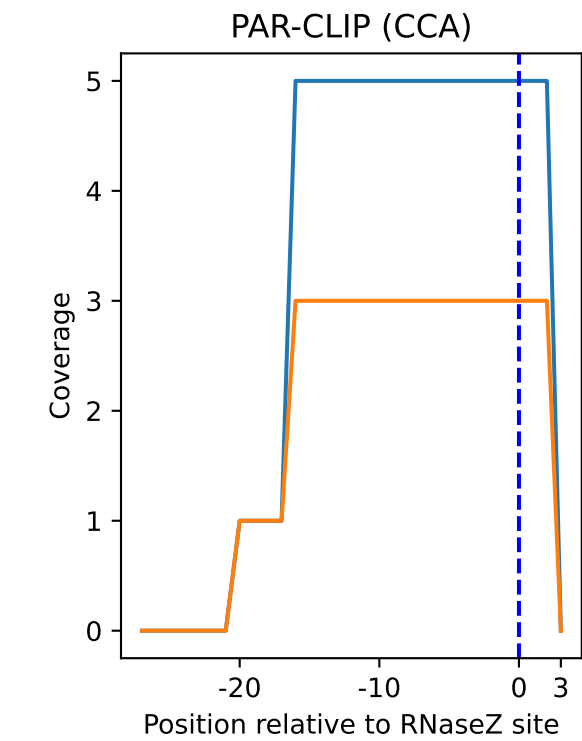

# tRNA-Ile-AAT-1-6

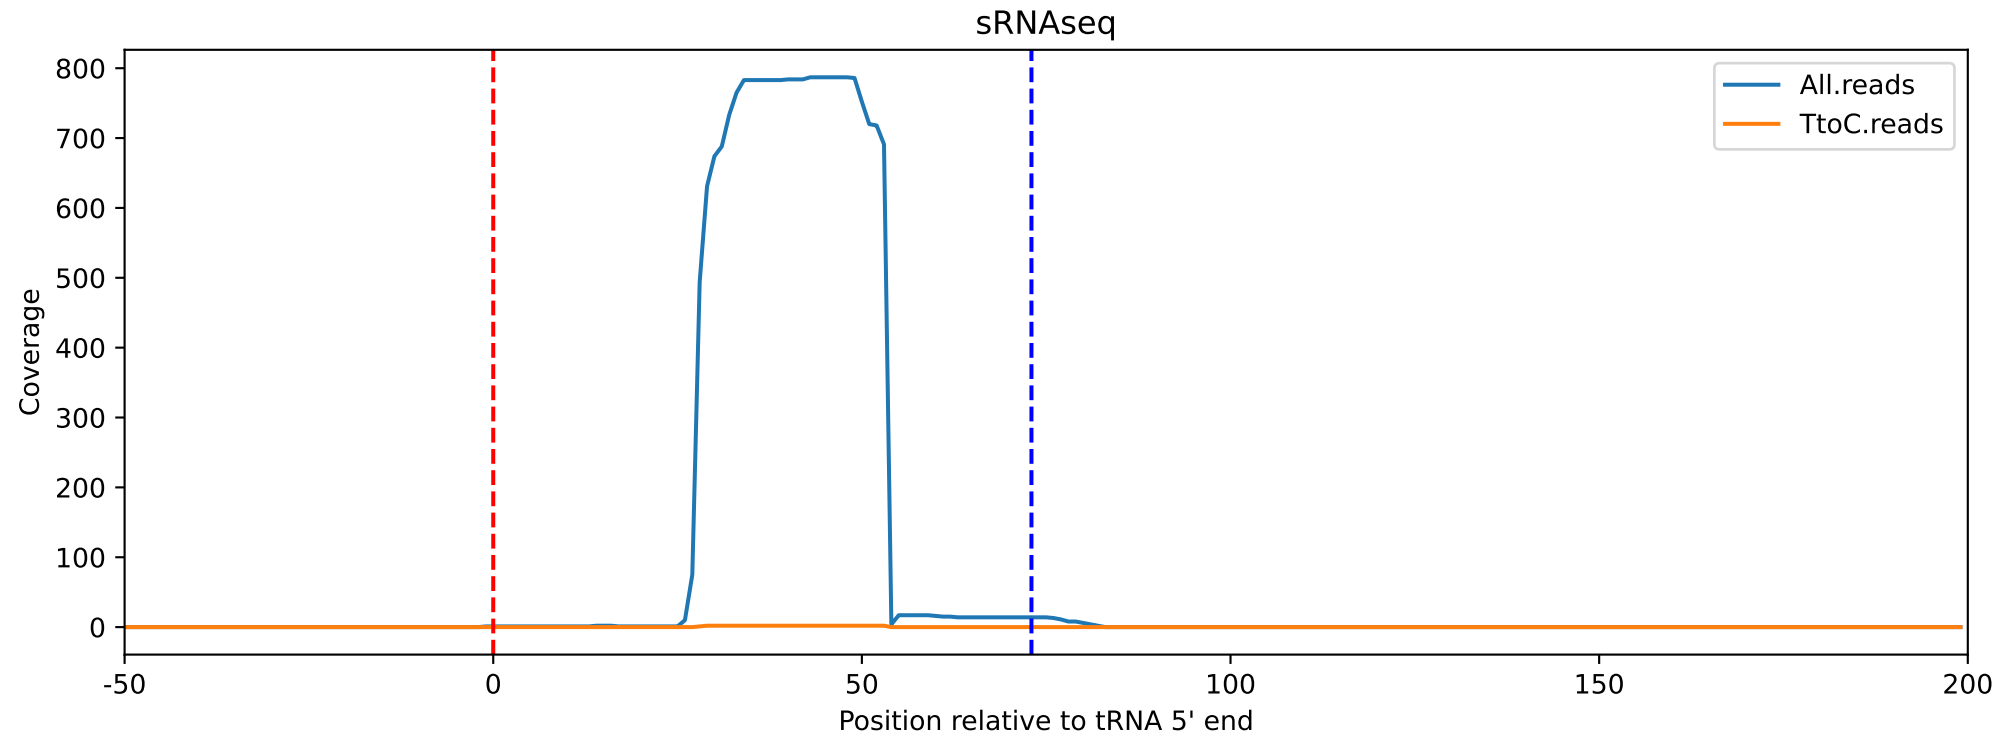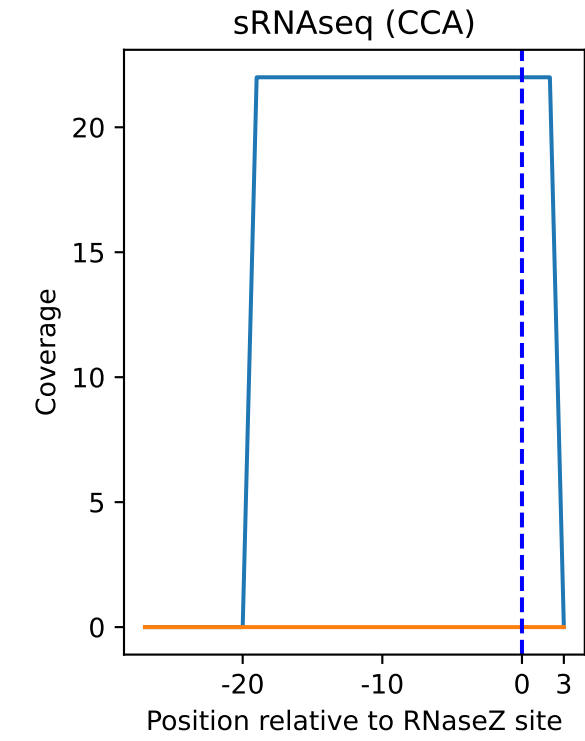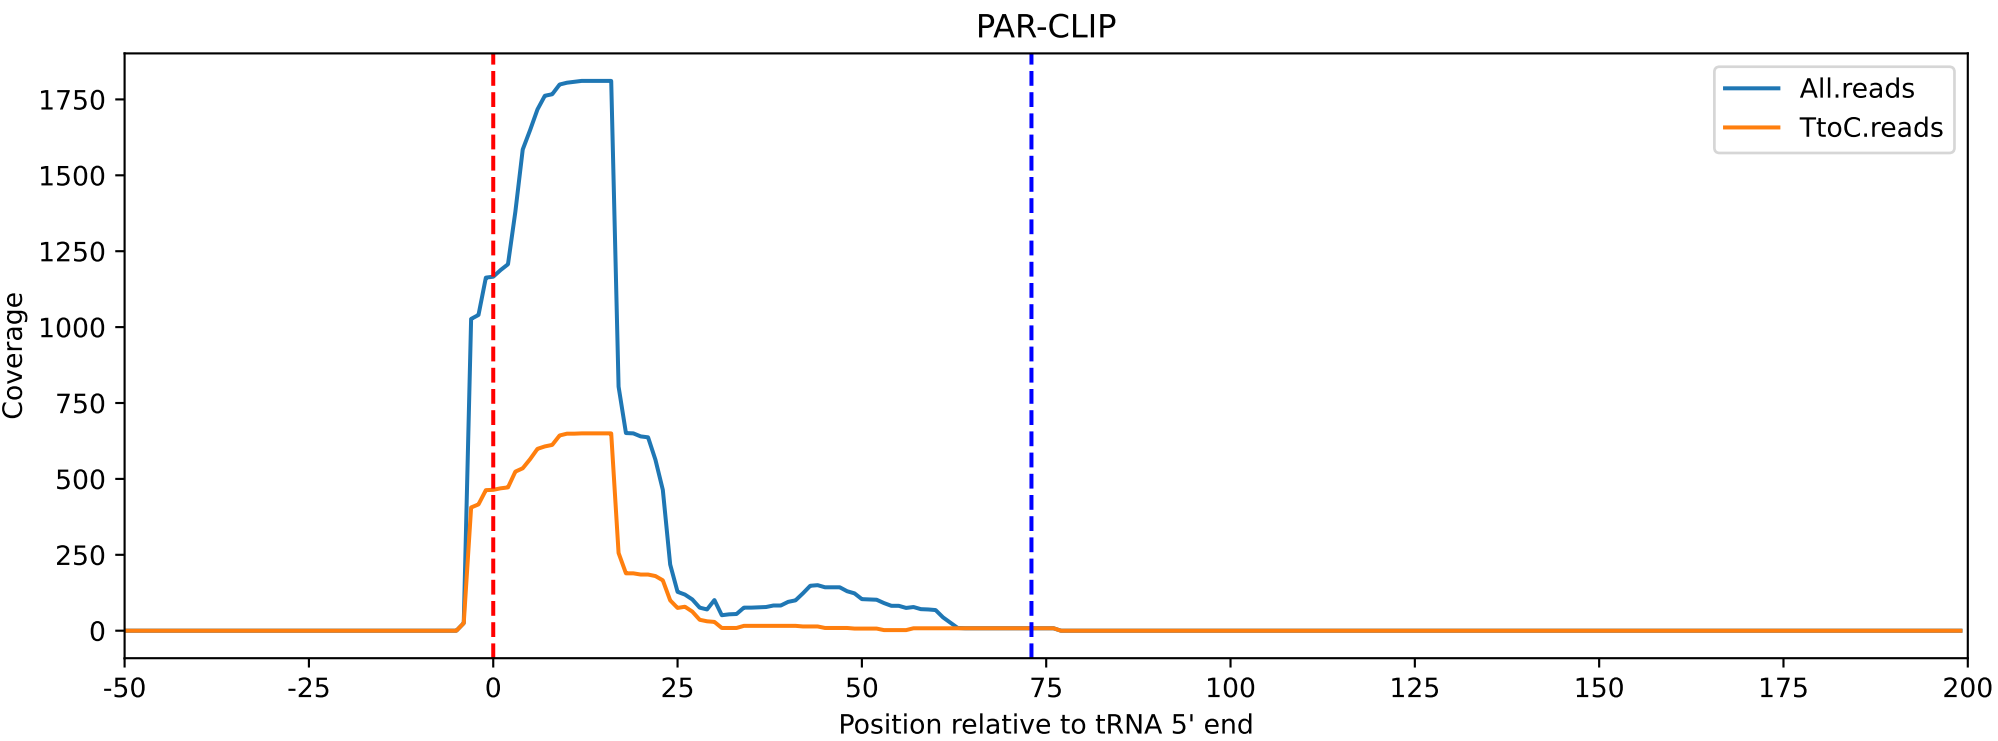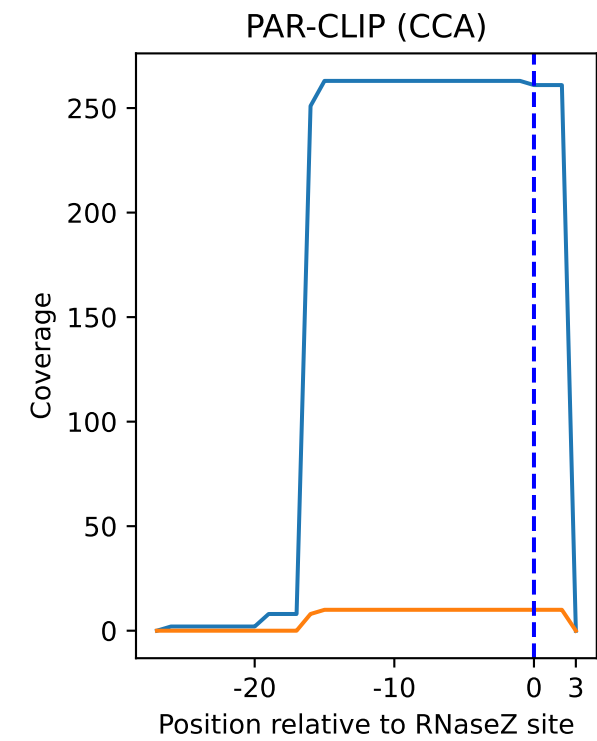

# tRNA-Gly-TCC-1-3

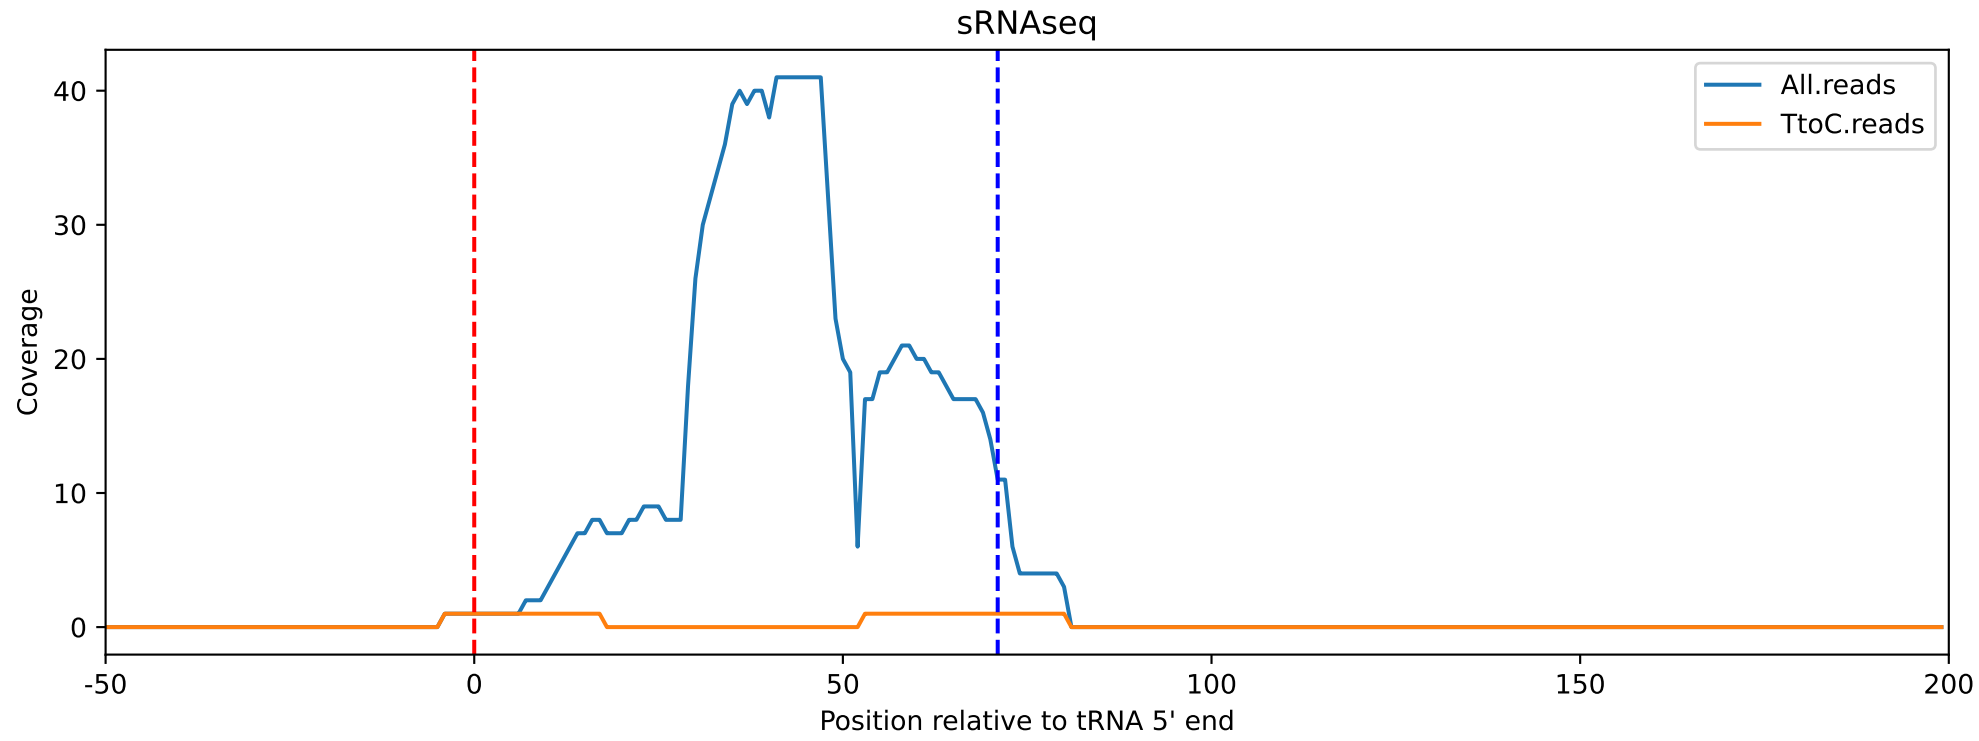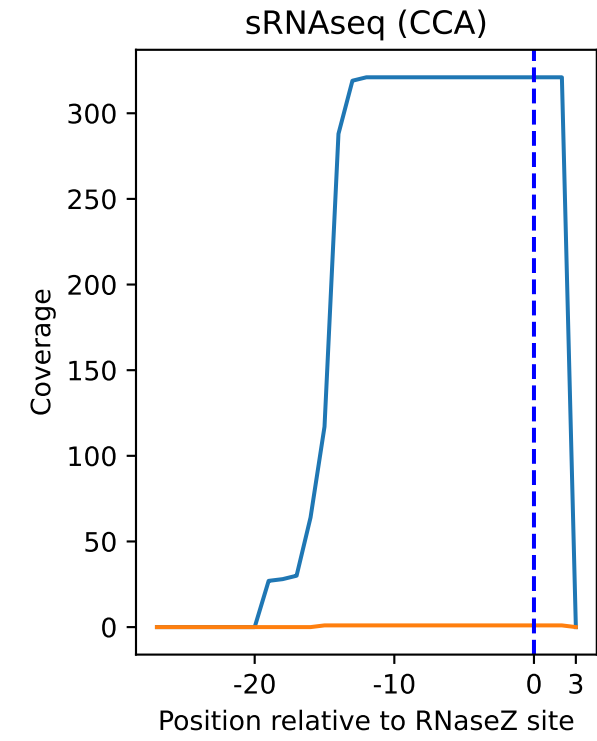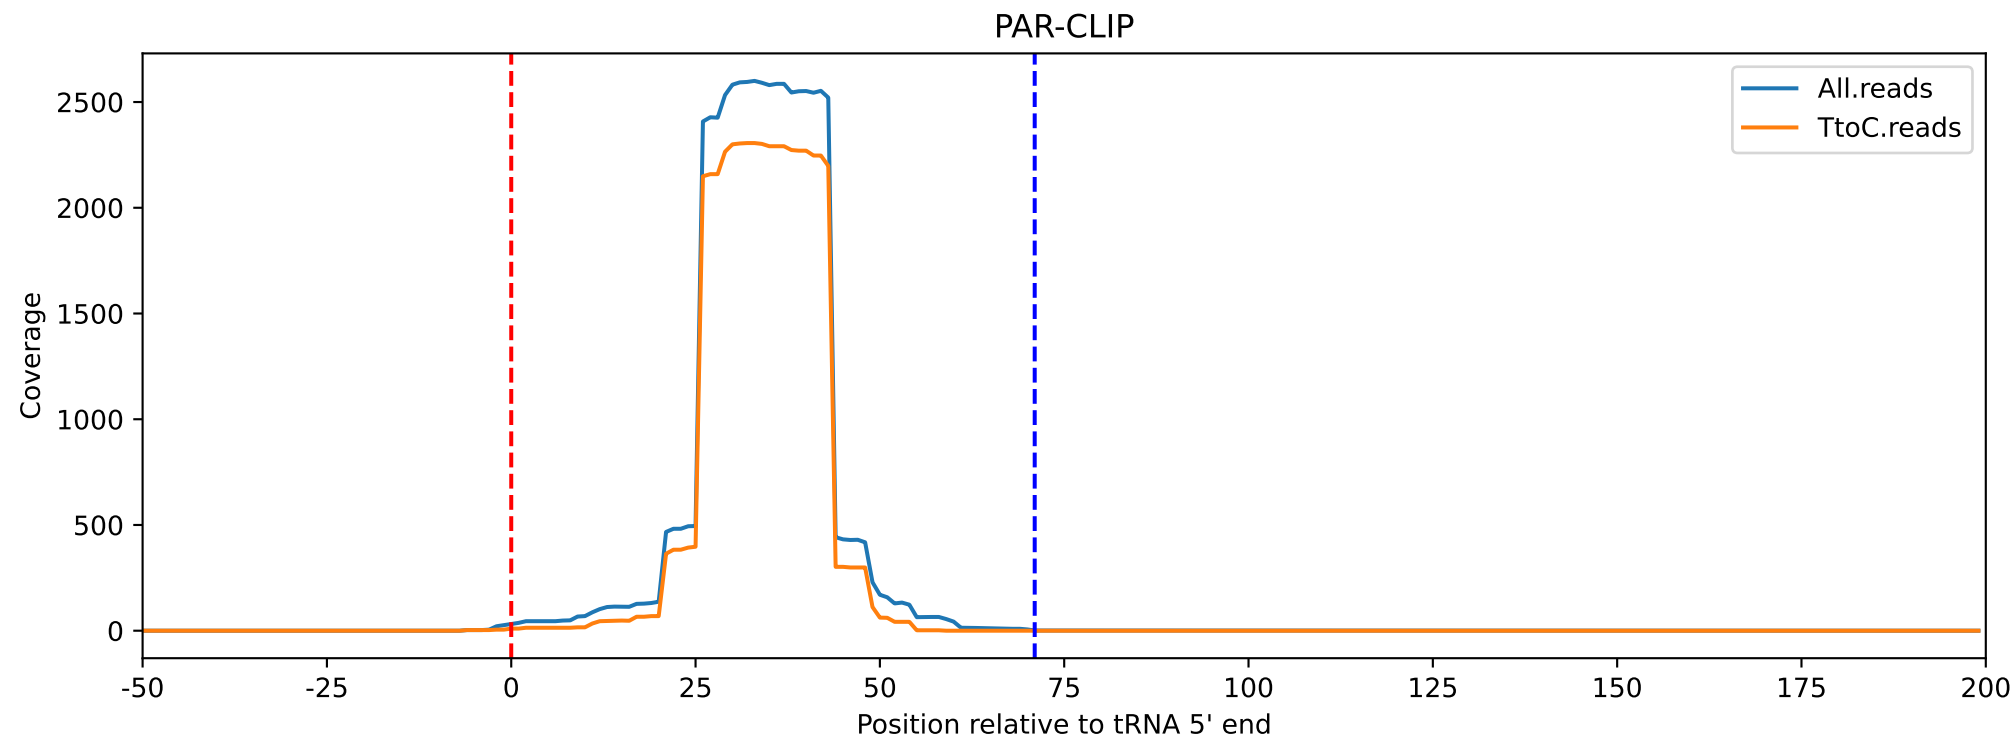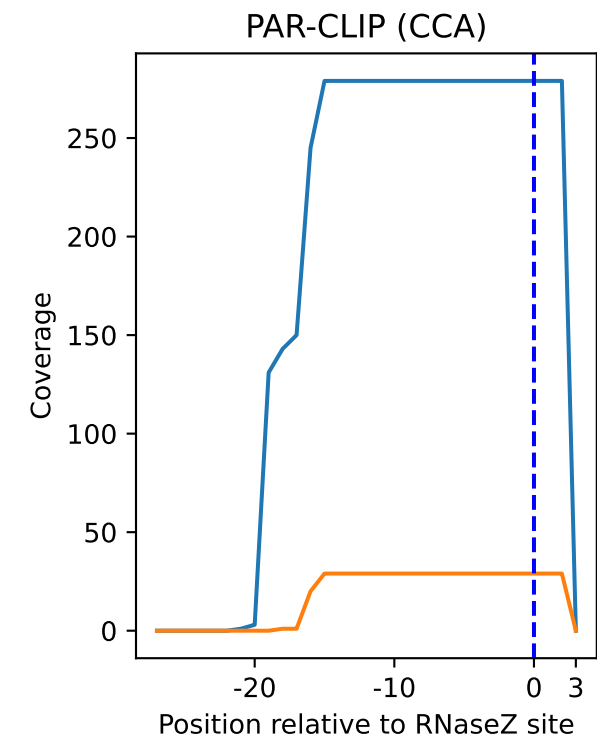

# tRNA-Glu-CTC-3-4

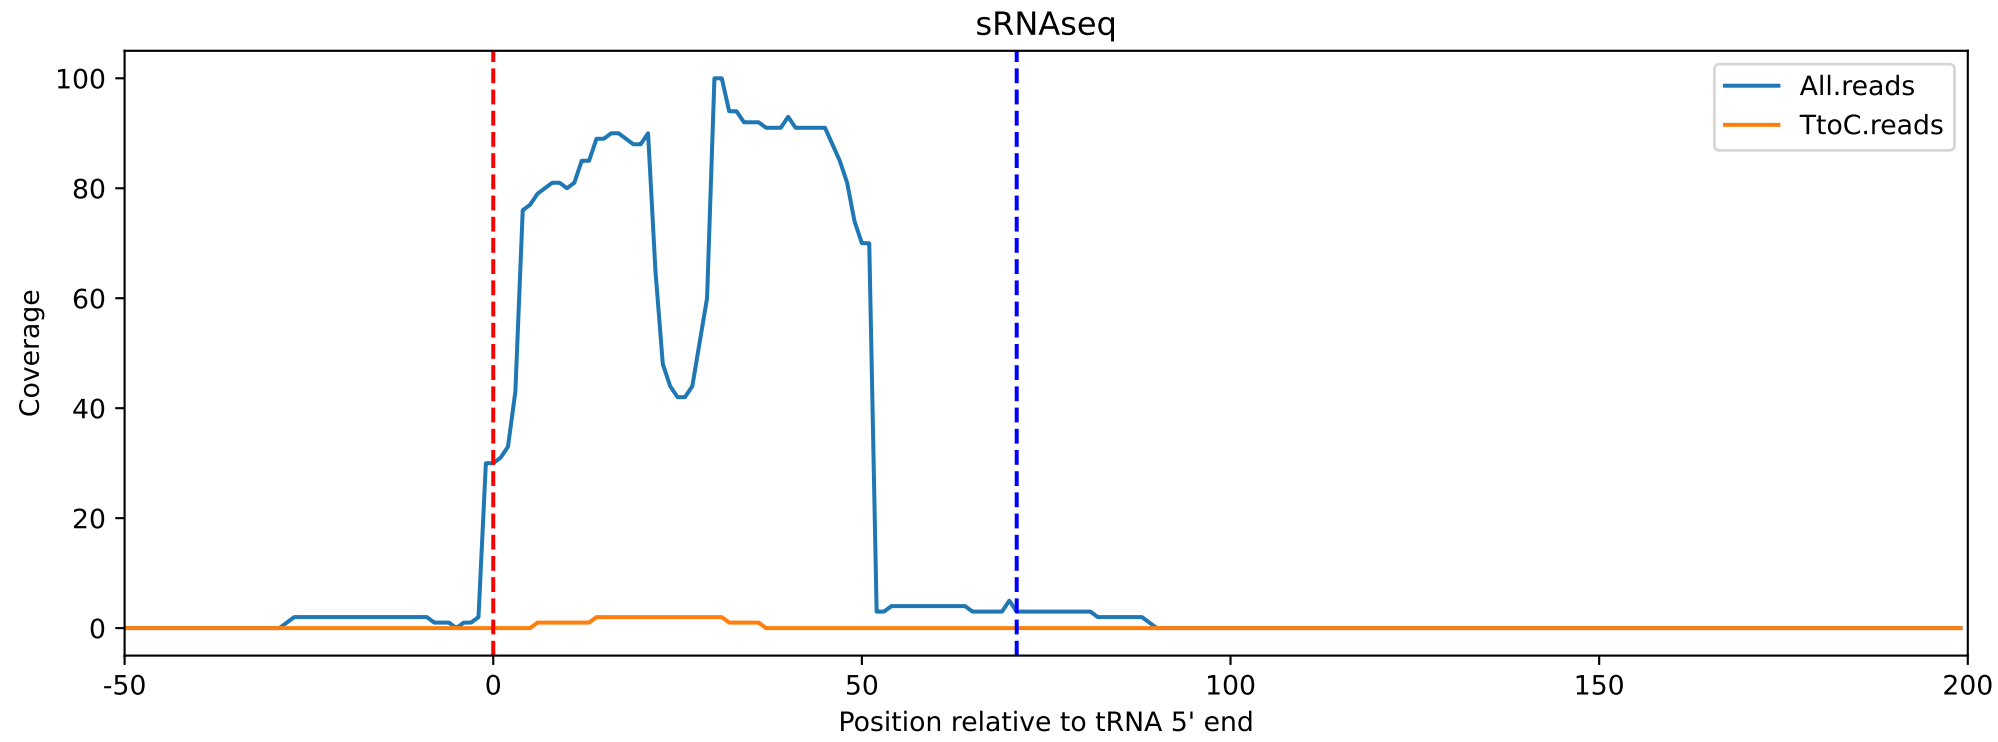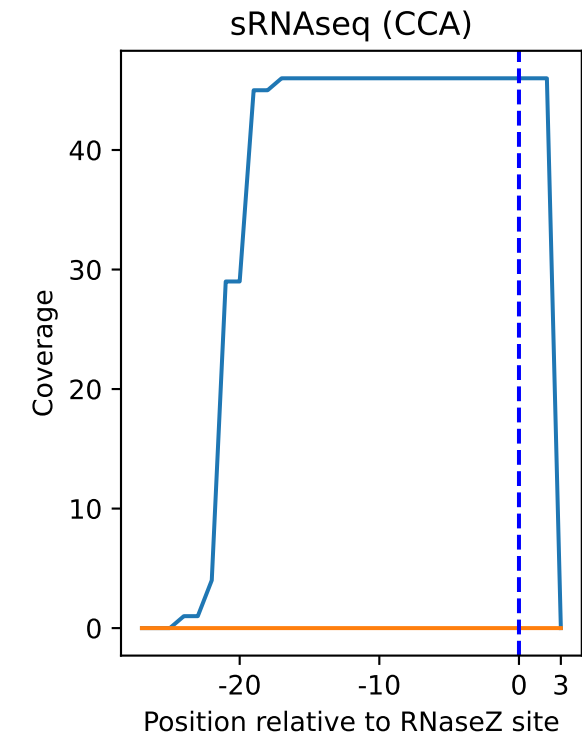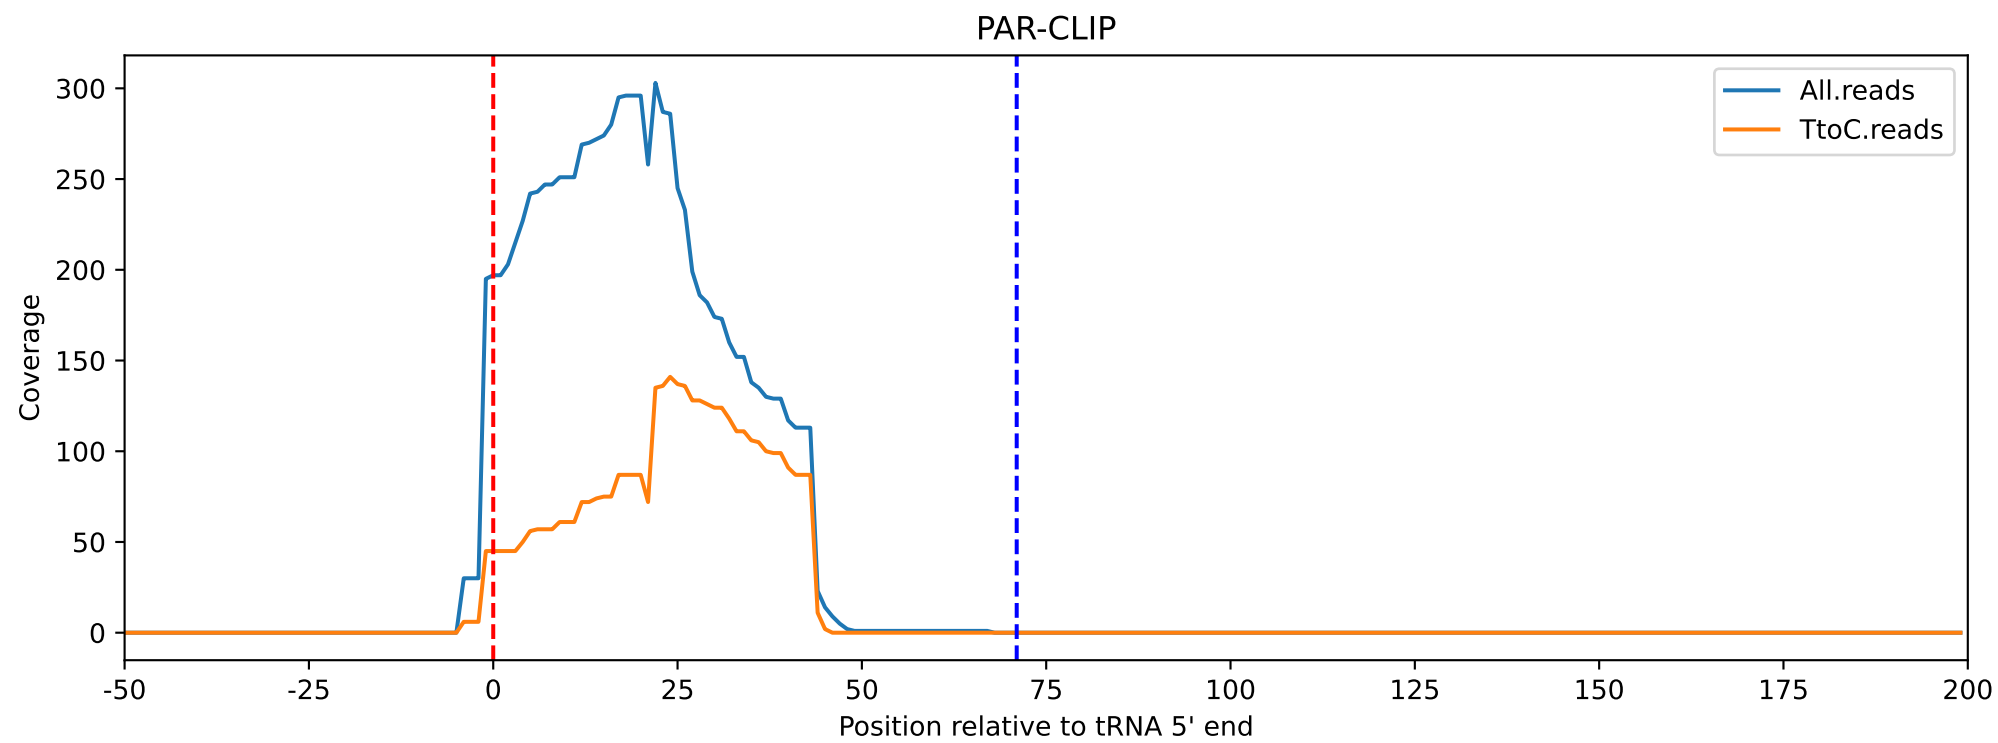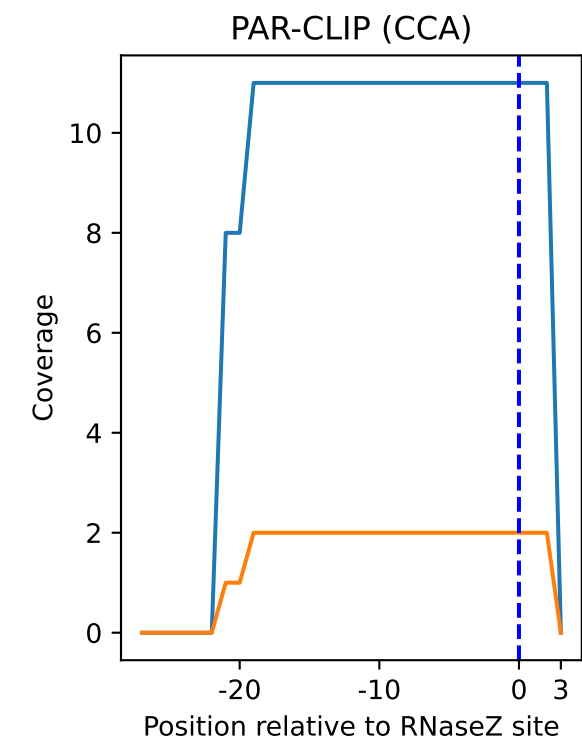



# tRNA-Leu-AAG-1-1

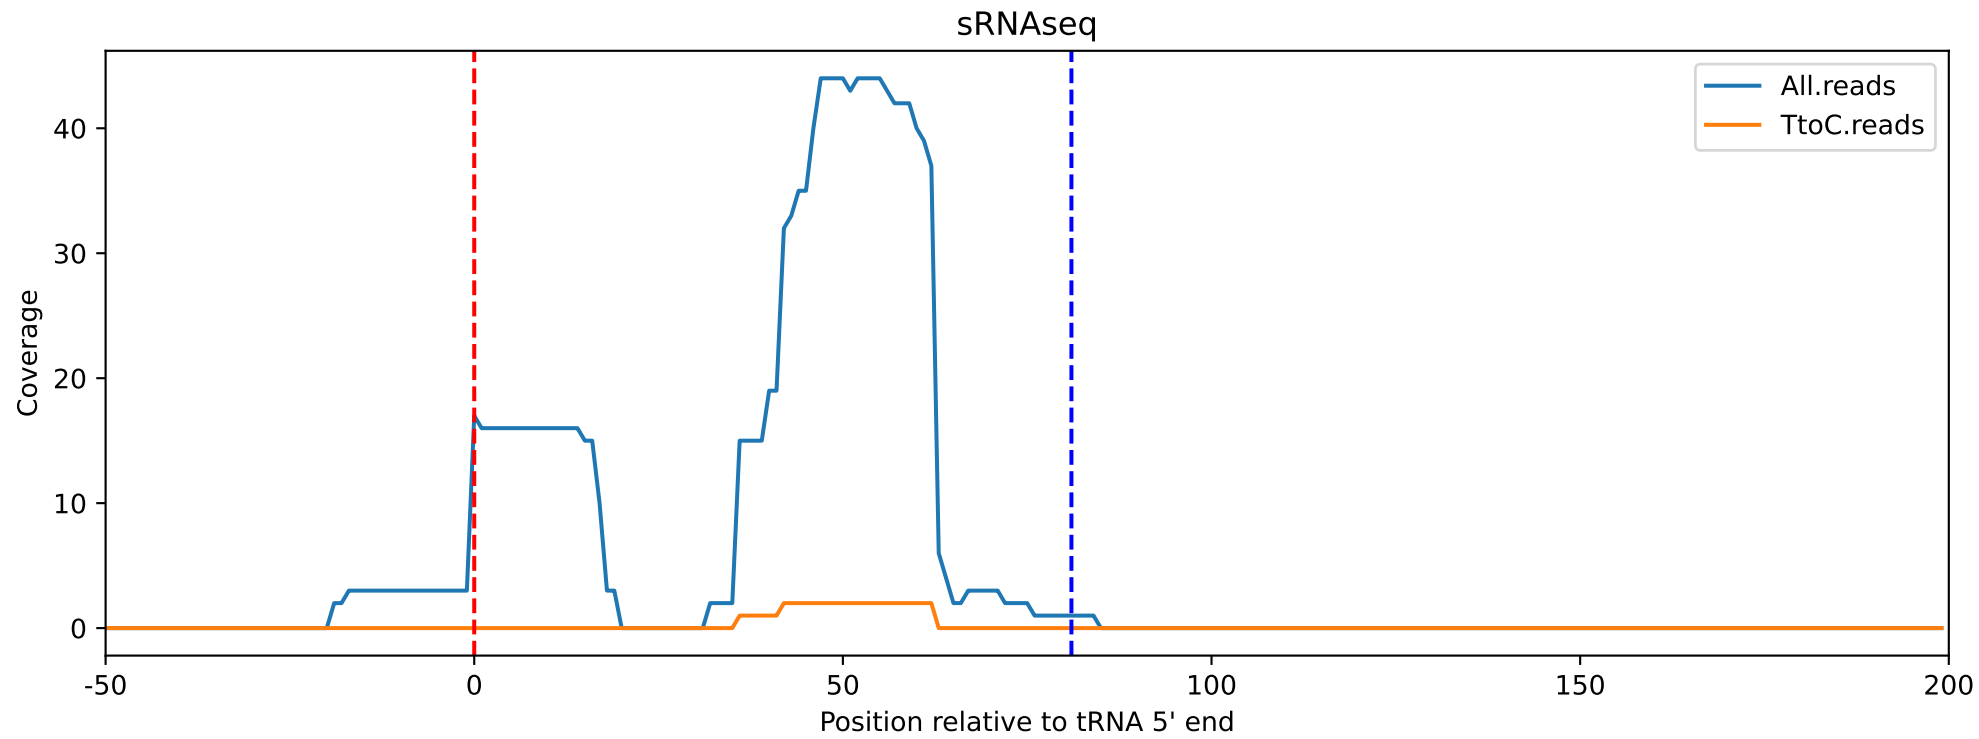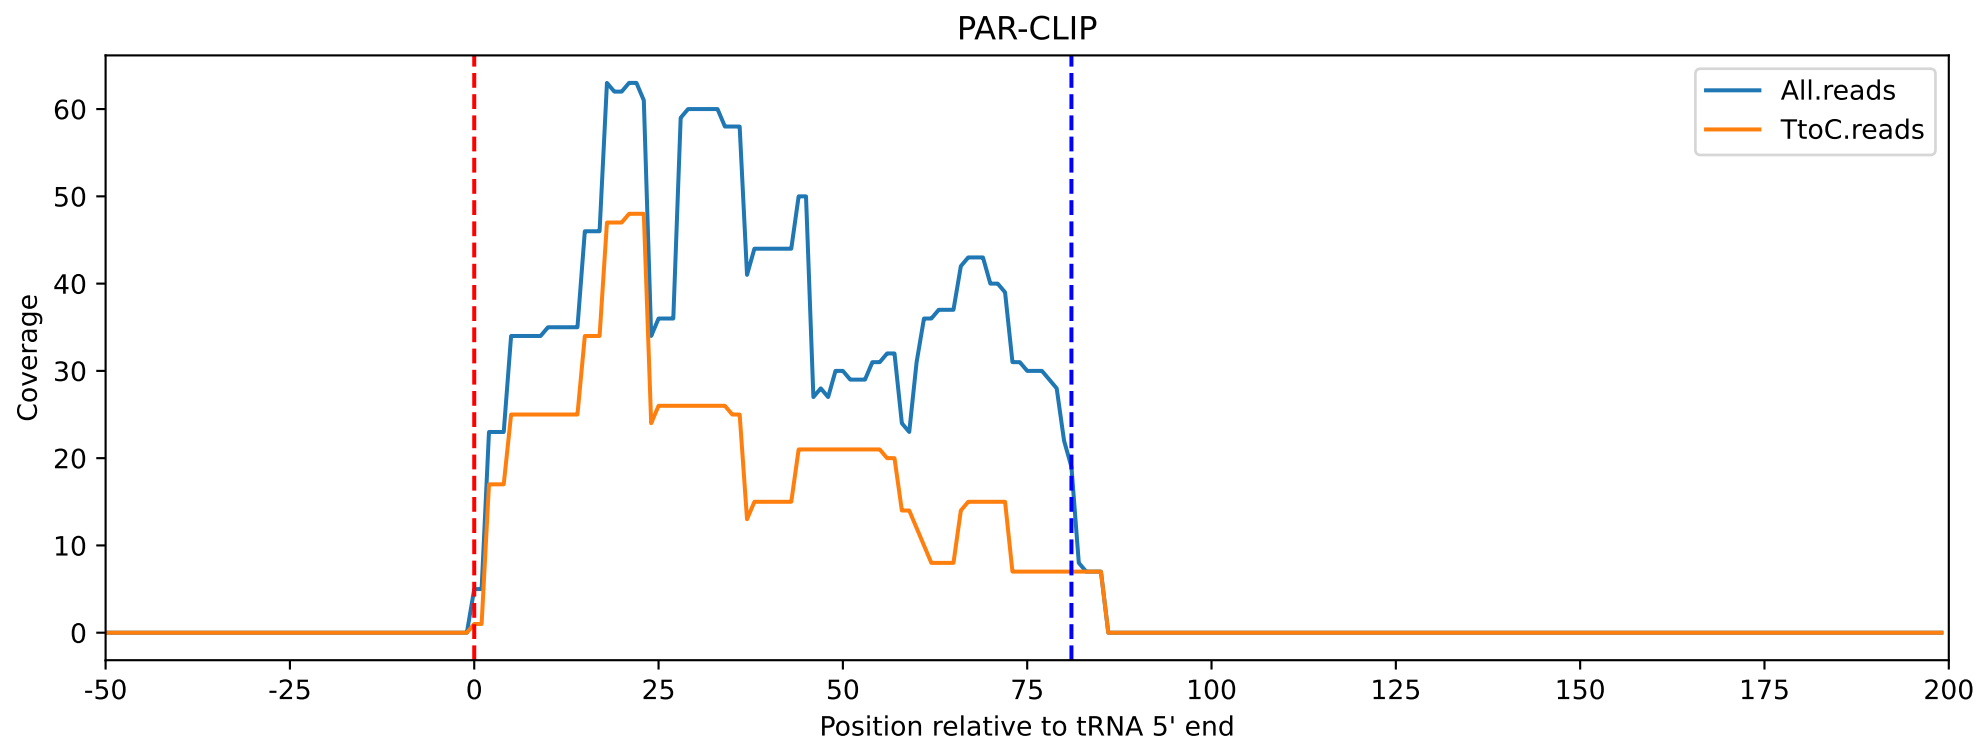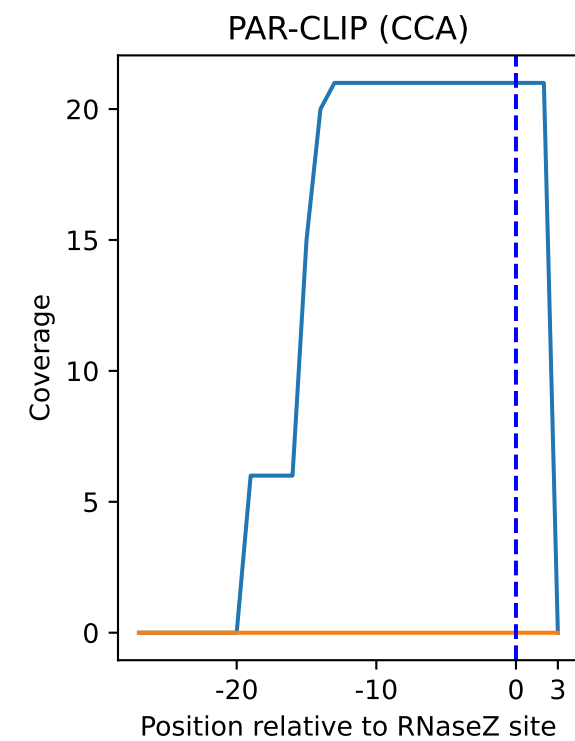

# tRNA-Phe-GAA-1-6

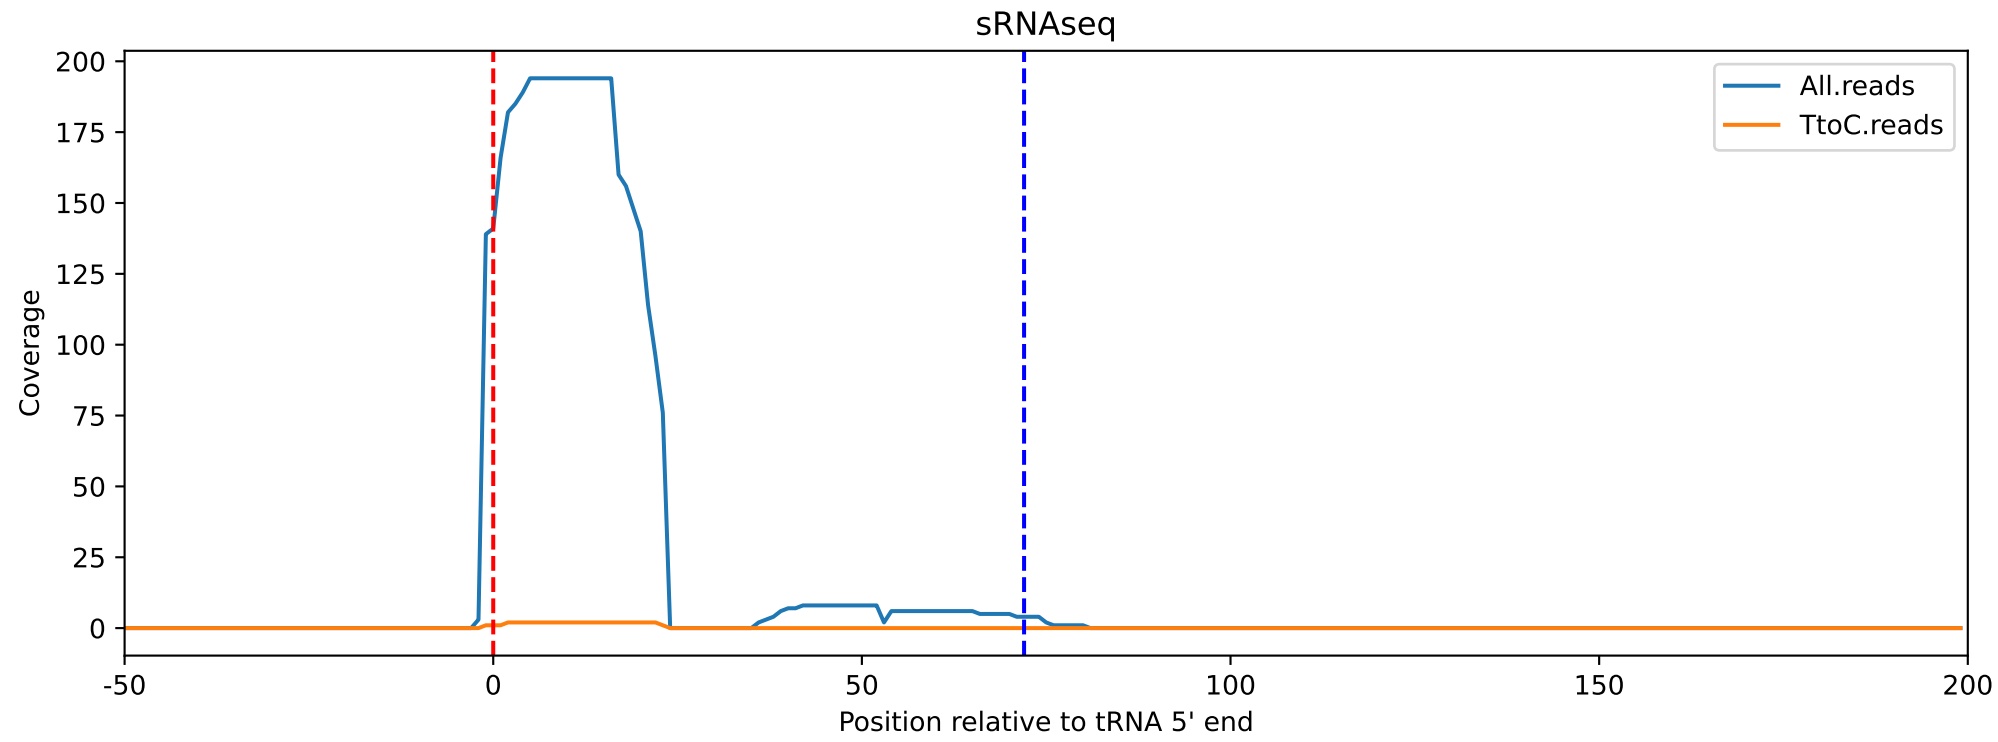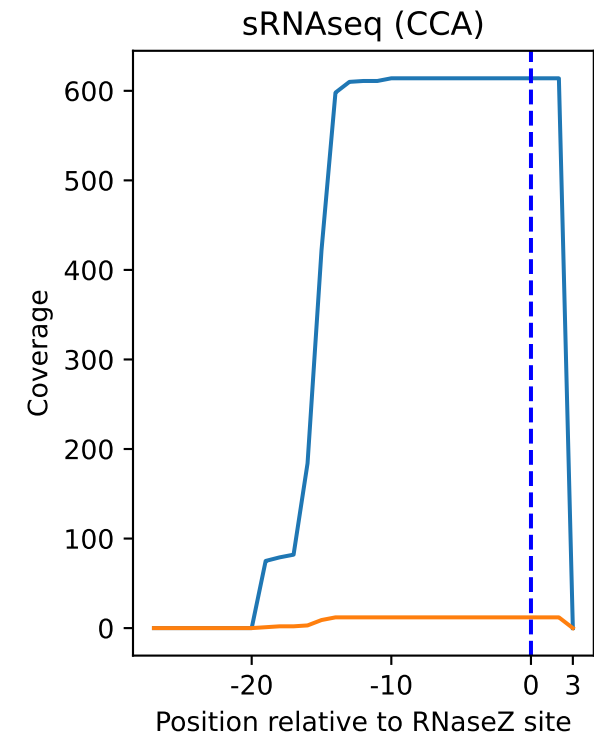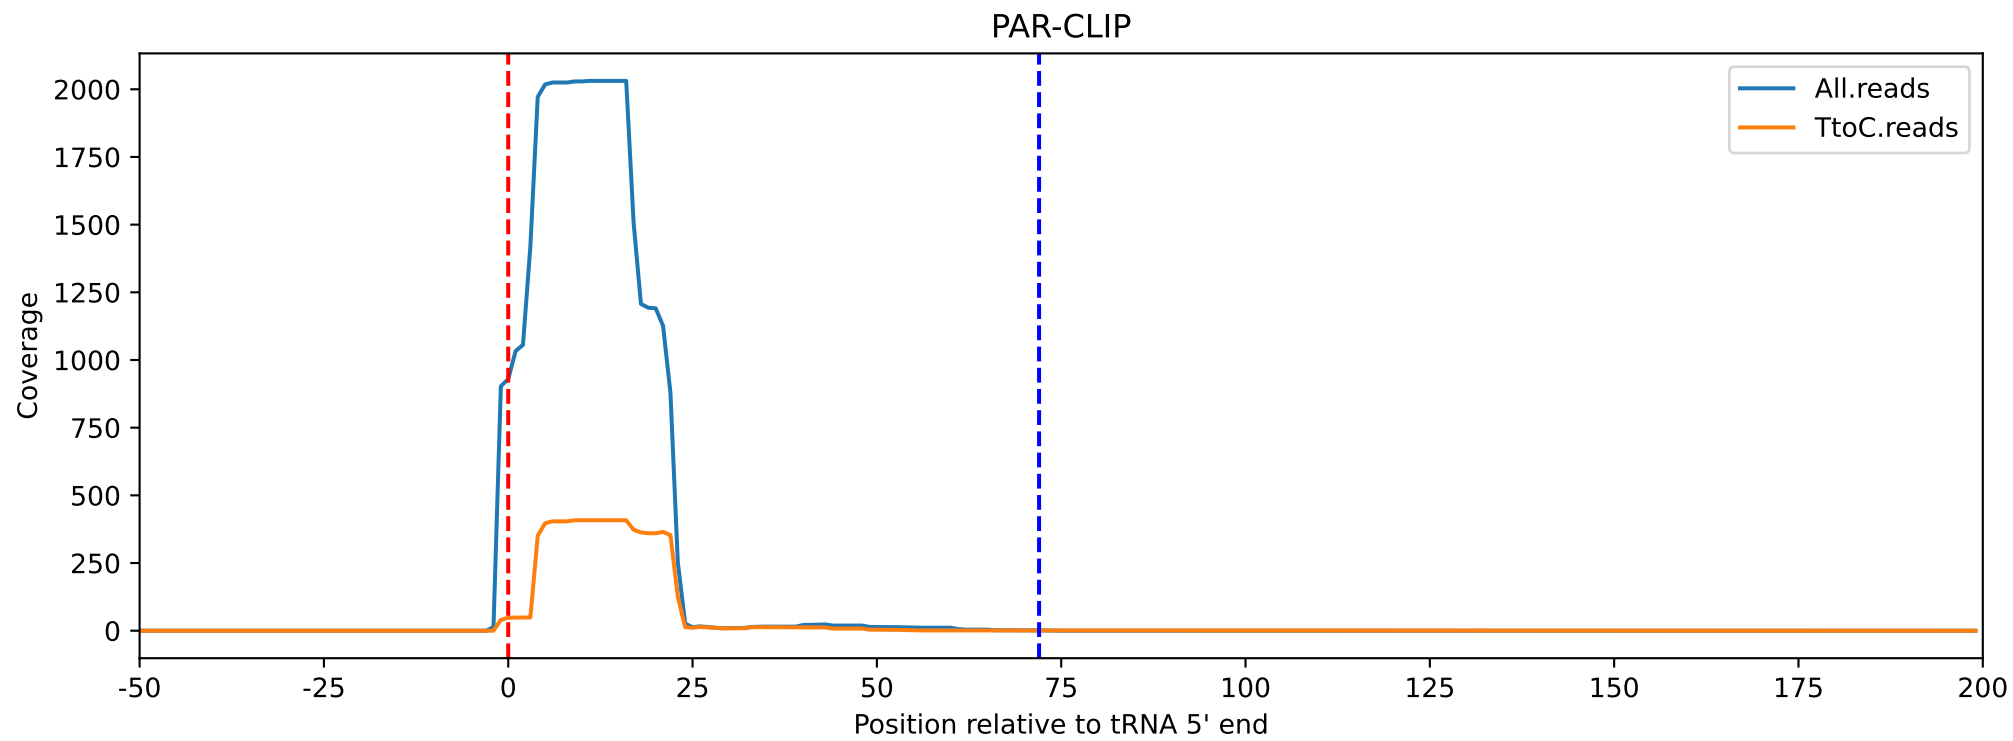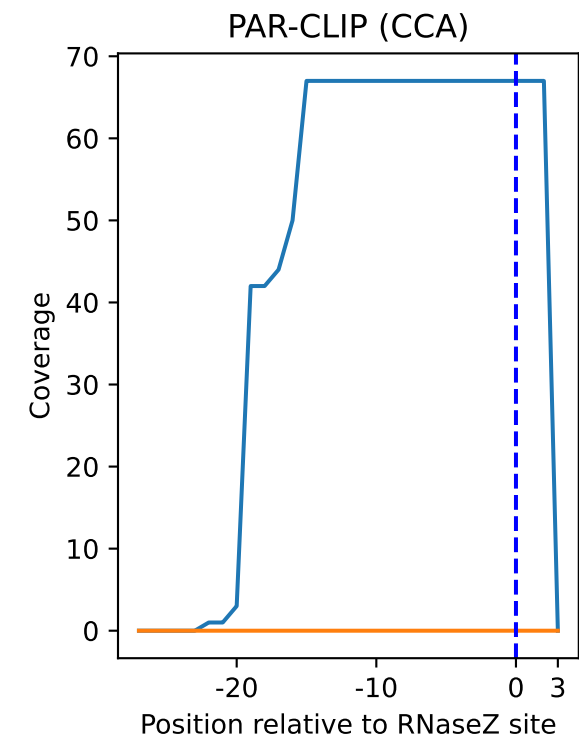

# tRNA-Glu-CTC-3-8

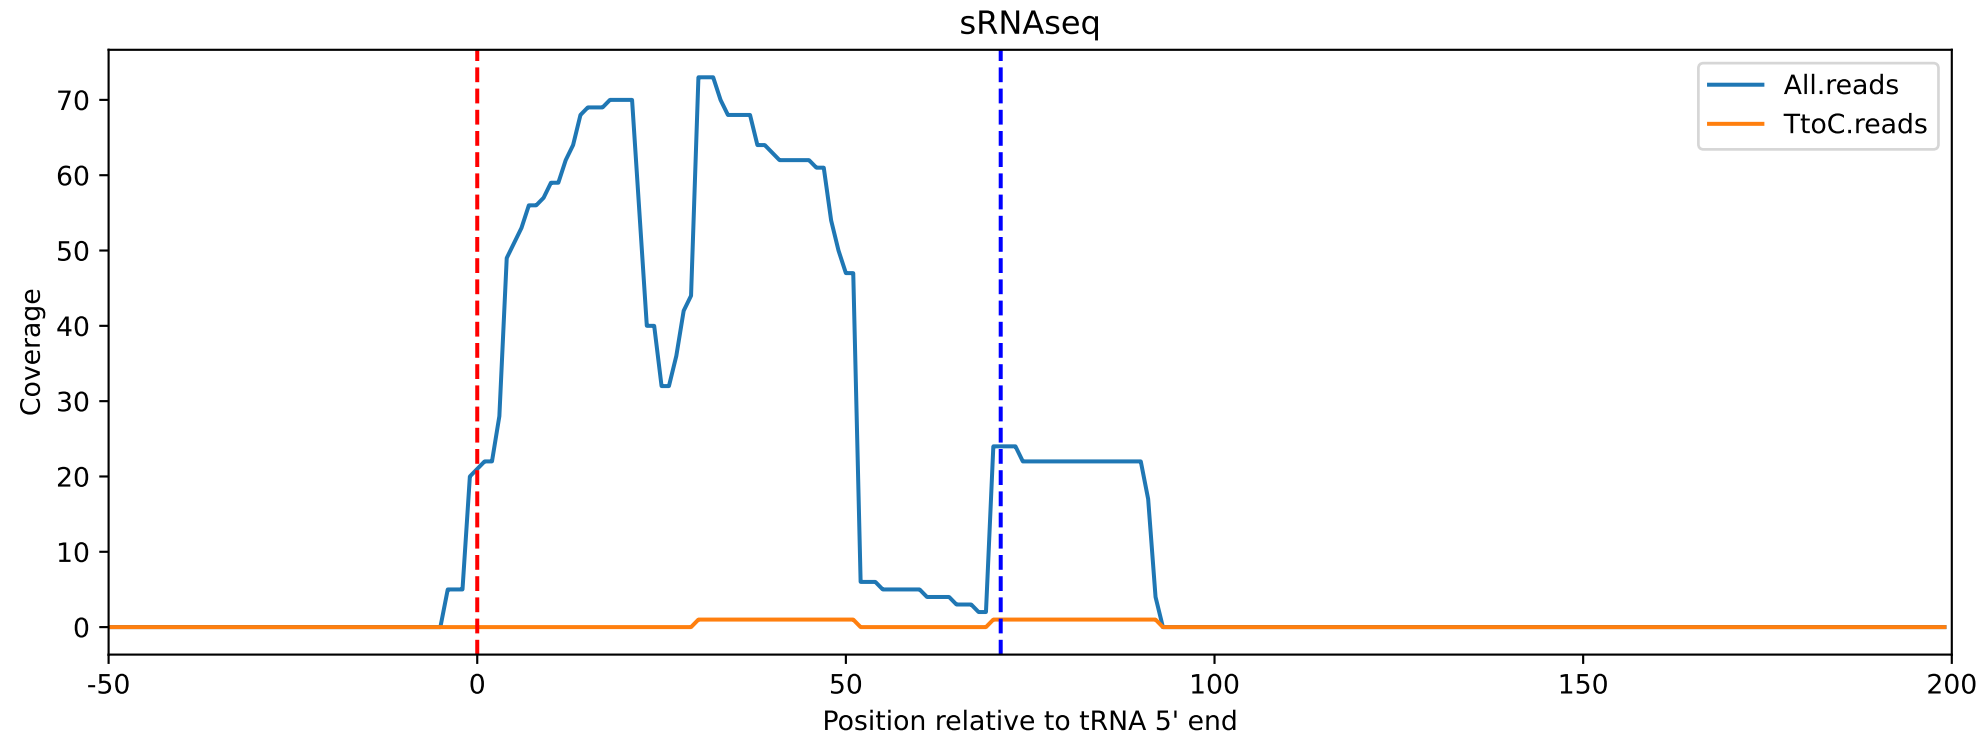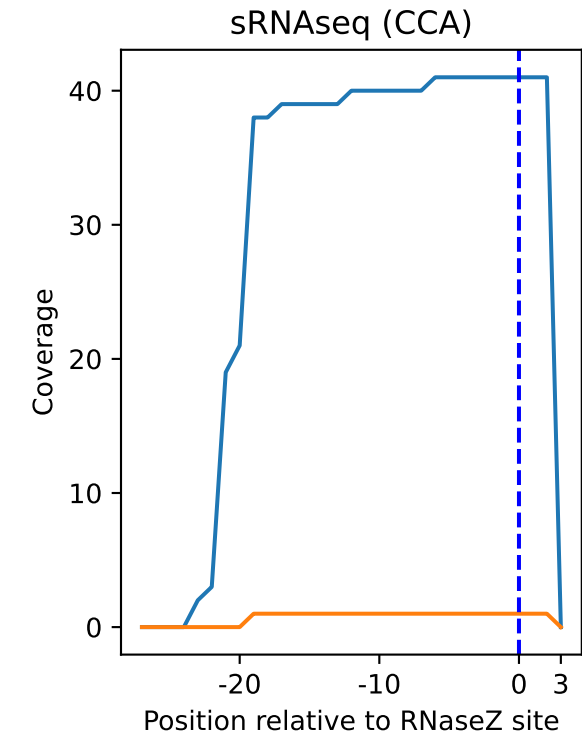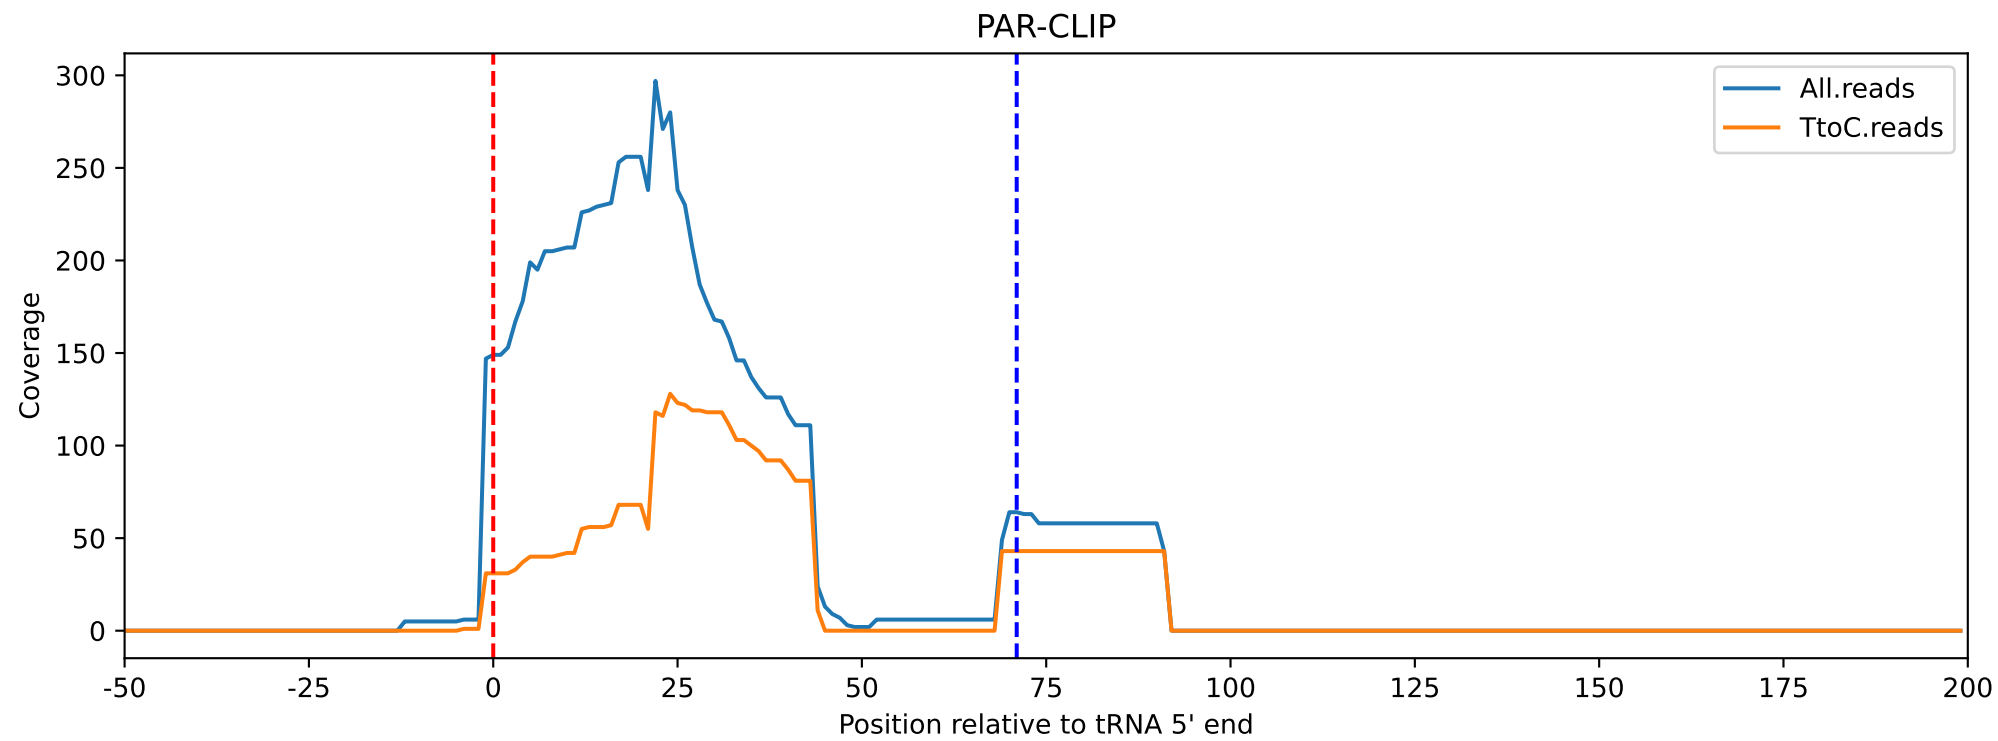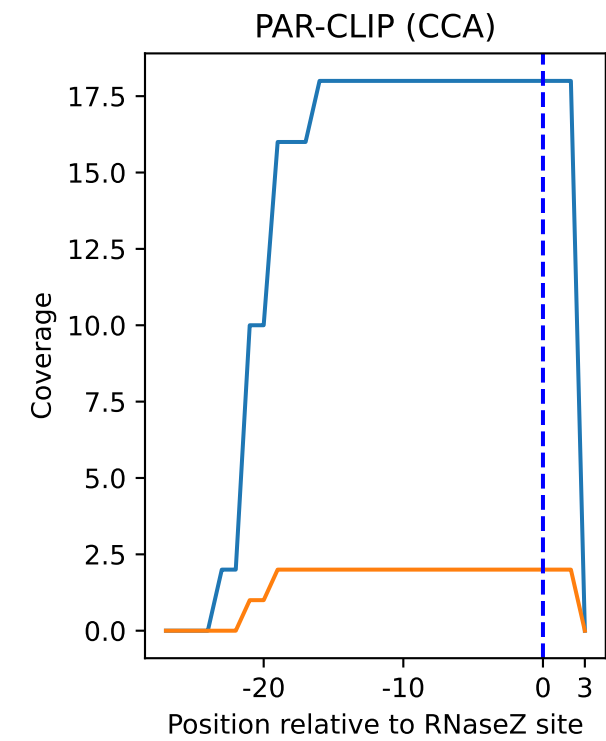

# tRNA-Ala-AGC-2-7

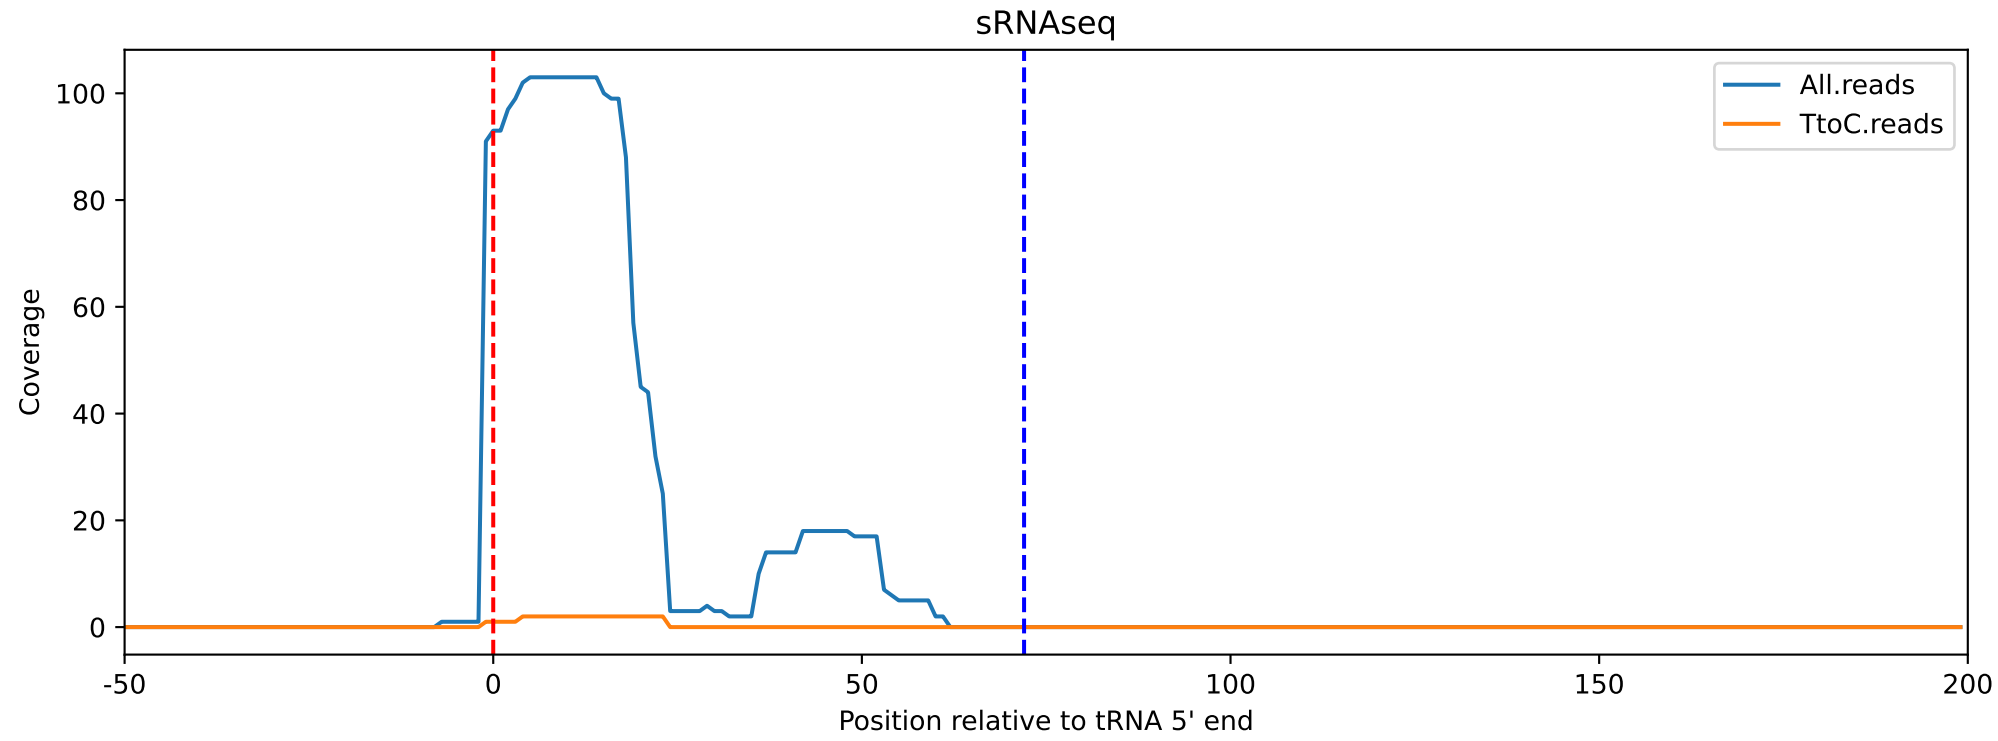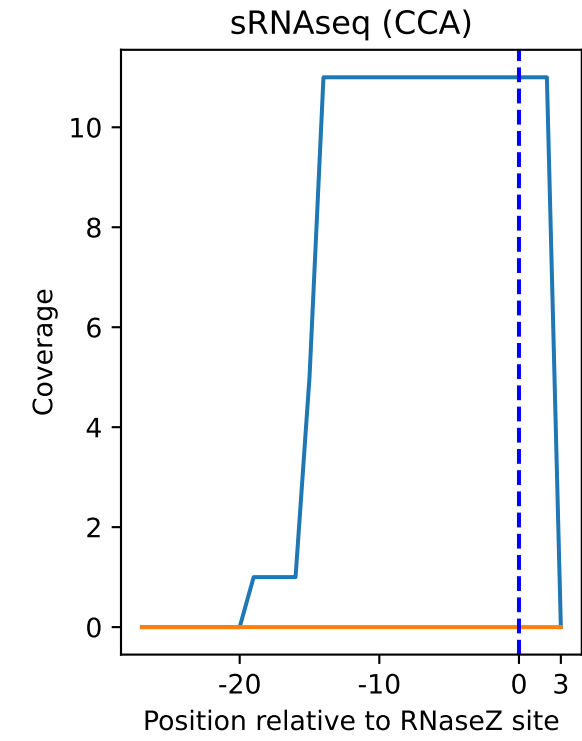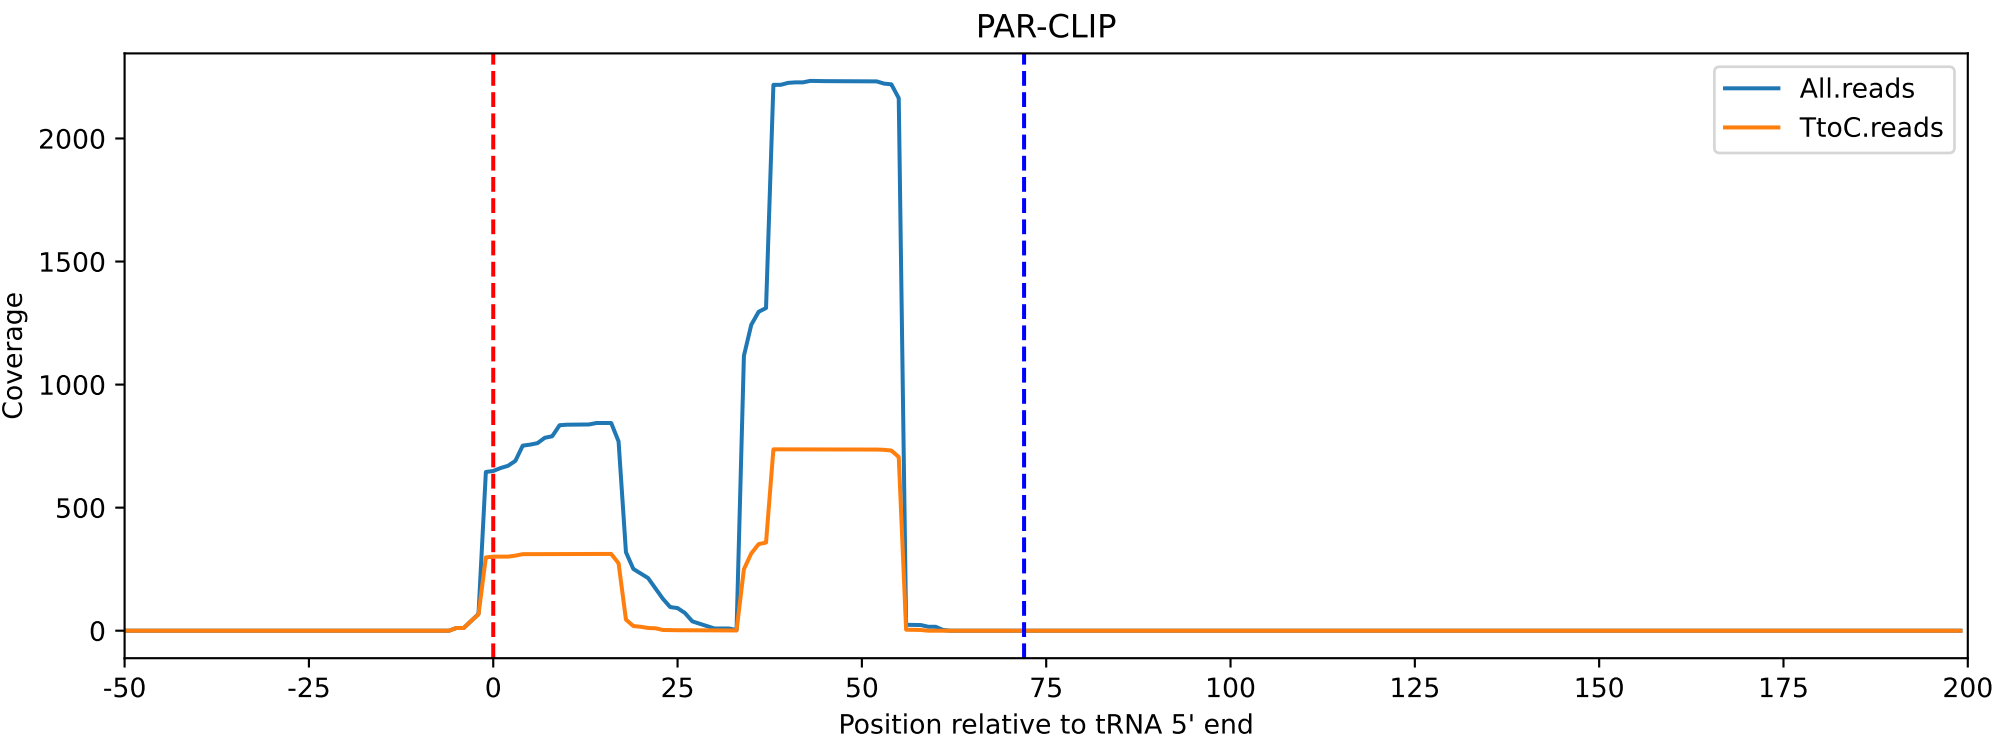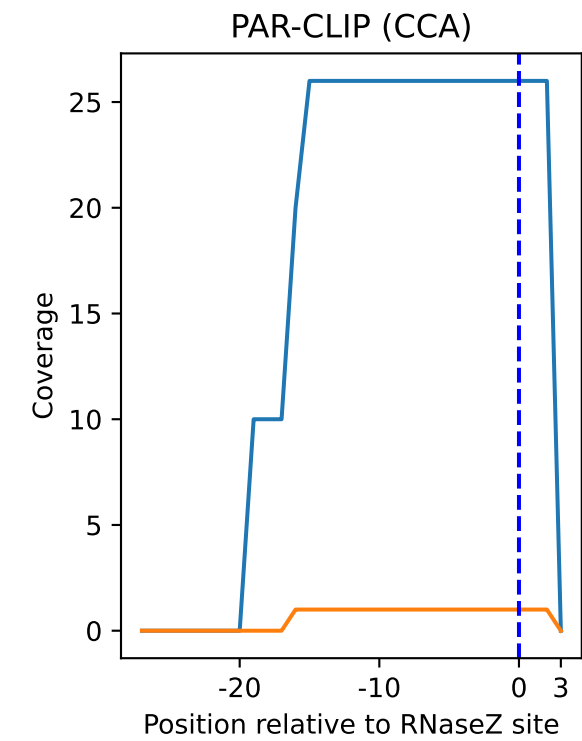

# tRNA-Glu-CTC-3-2

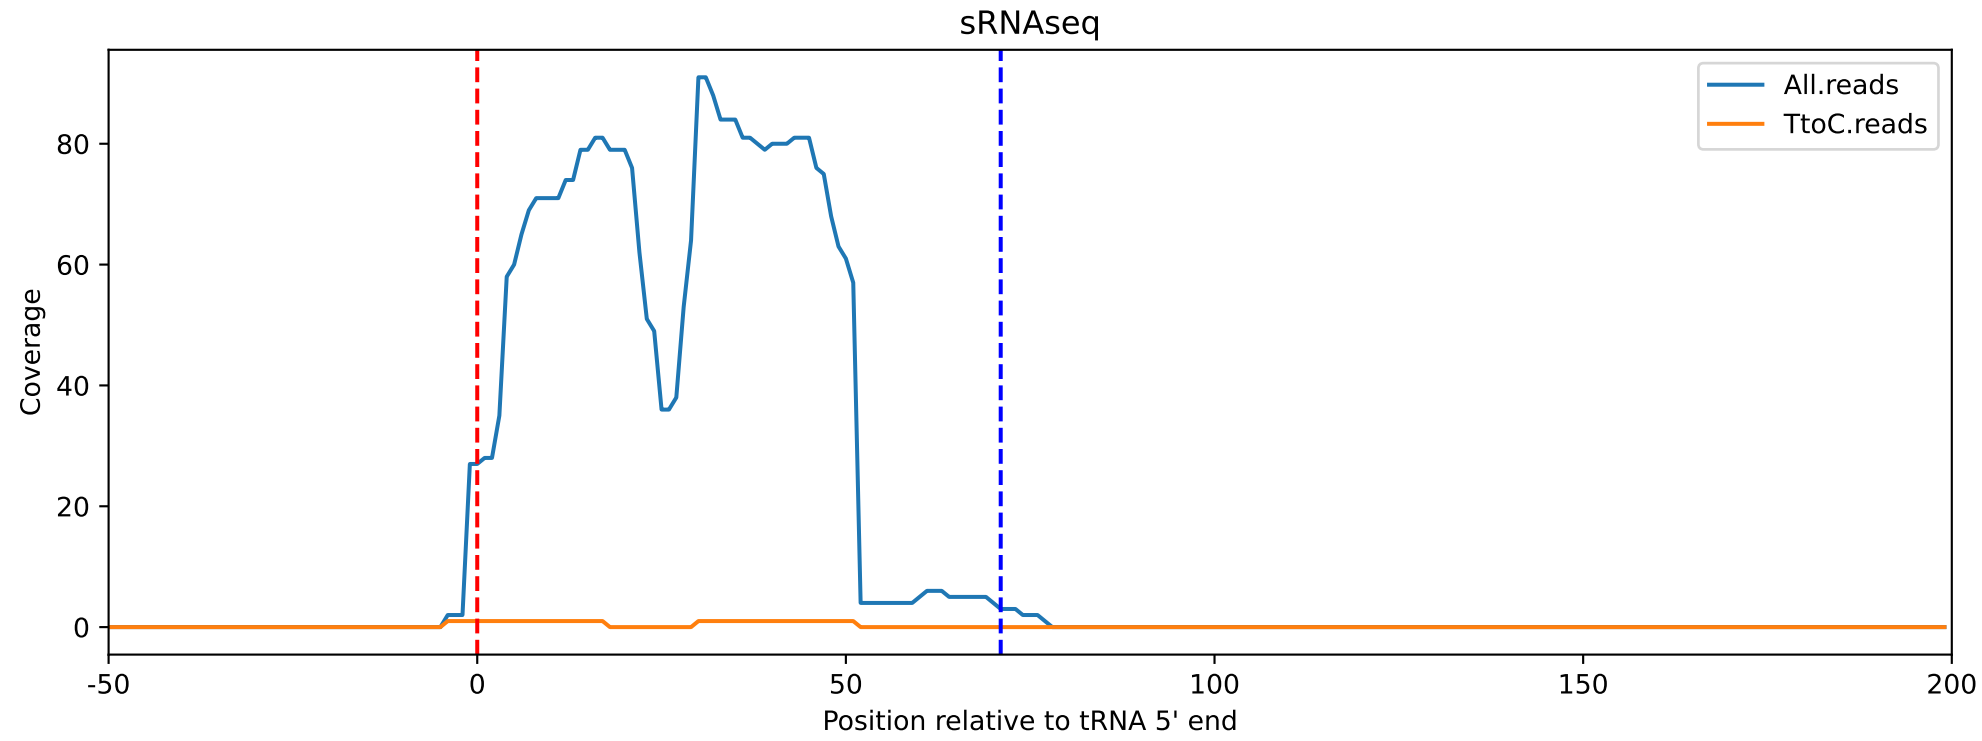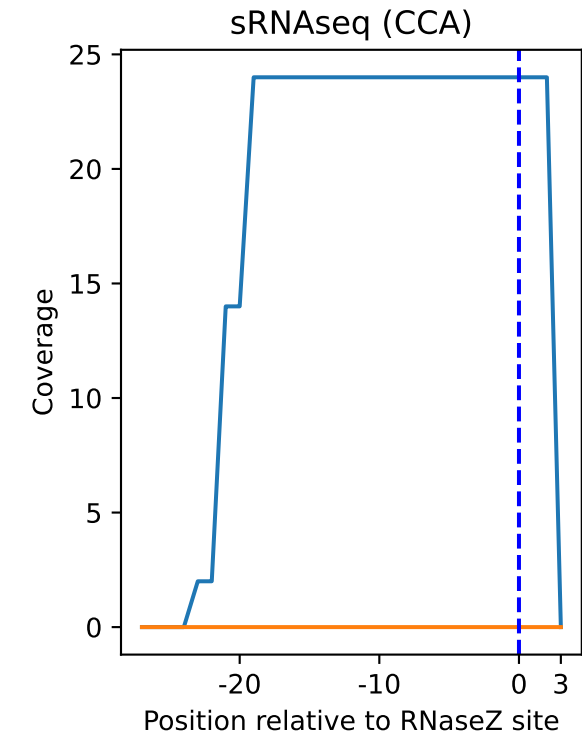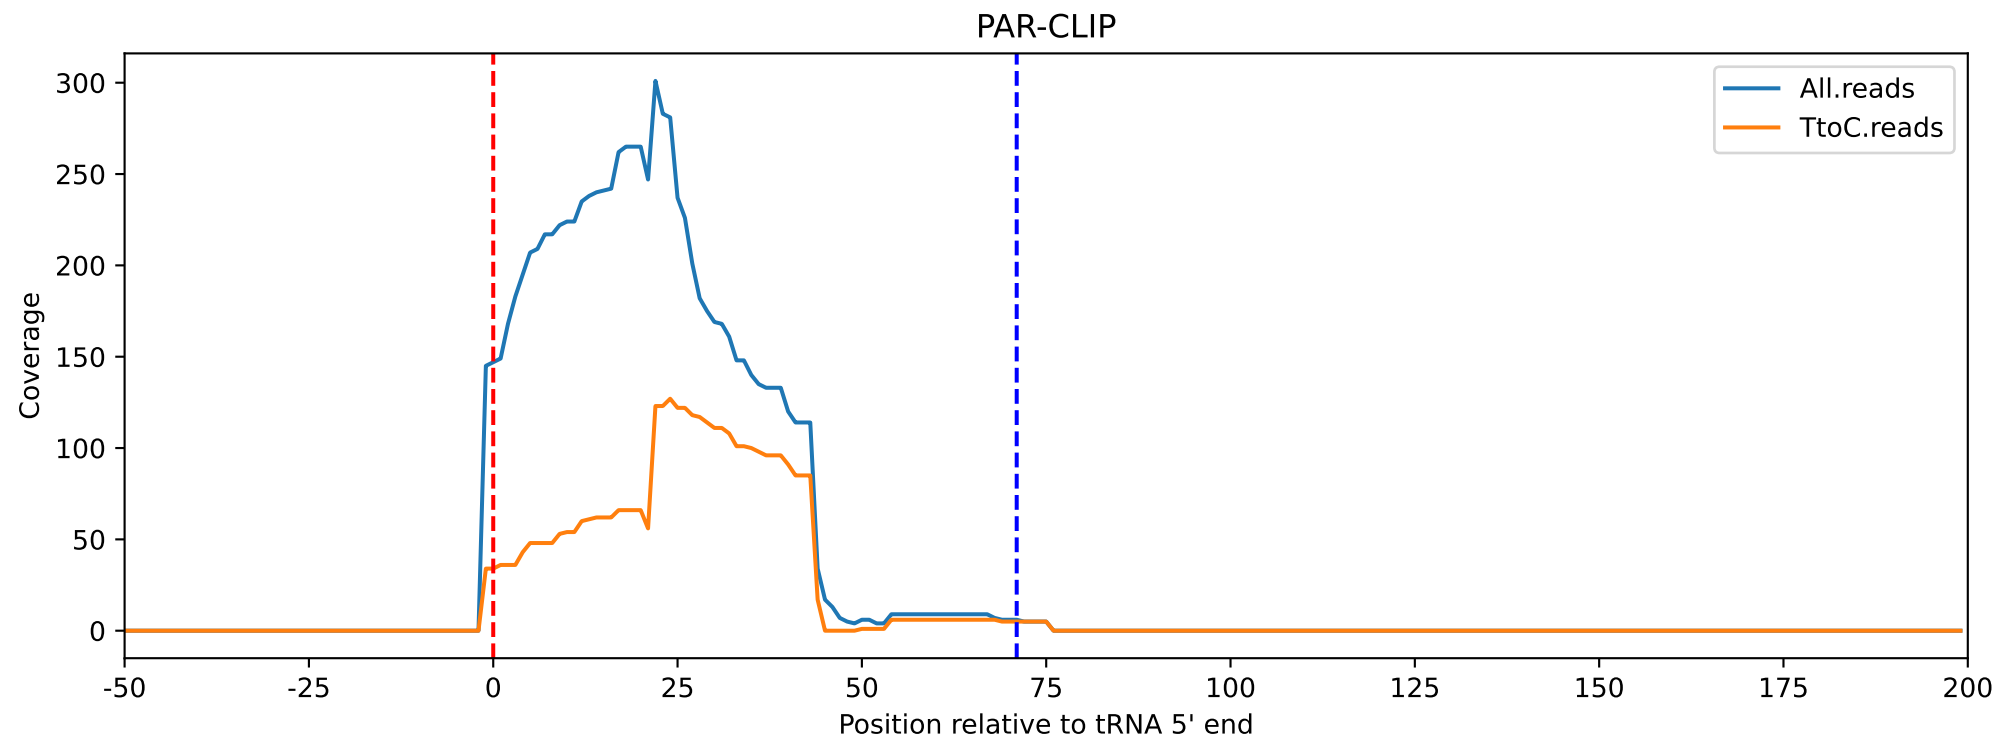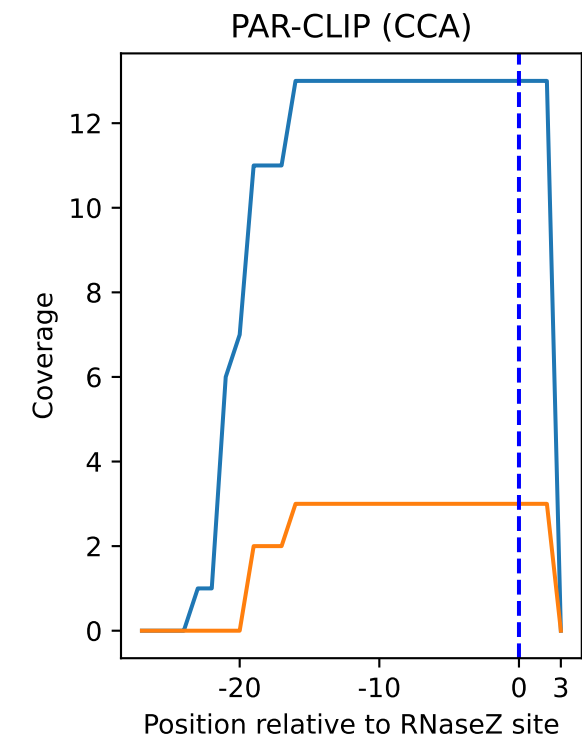

# tRNA-Ser-CGA-1-3

## sRNAseq

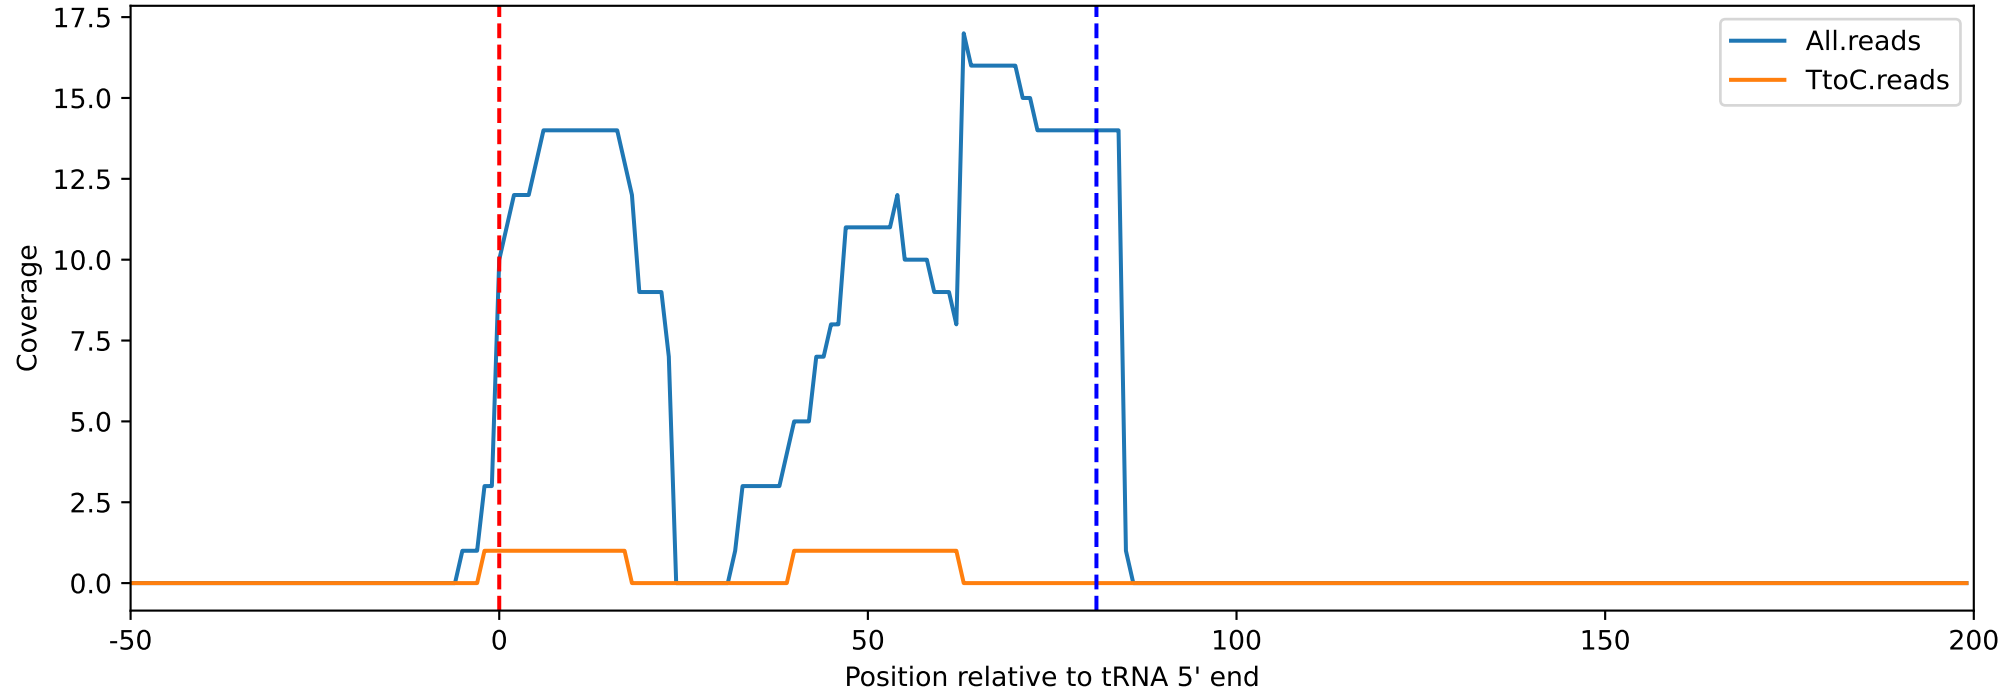

## sRNAseq (CCA)



## PAR-CLIP

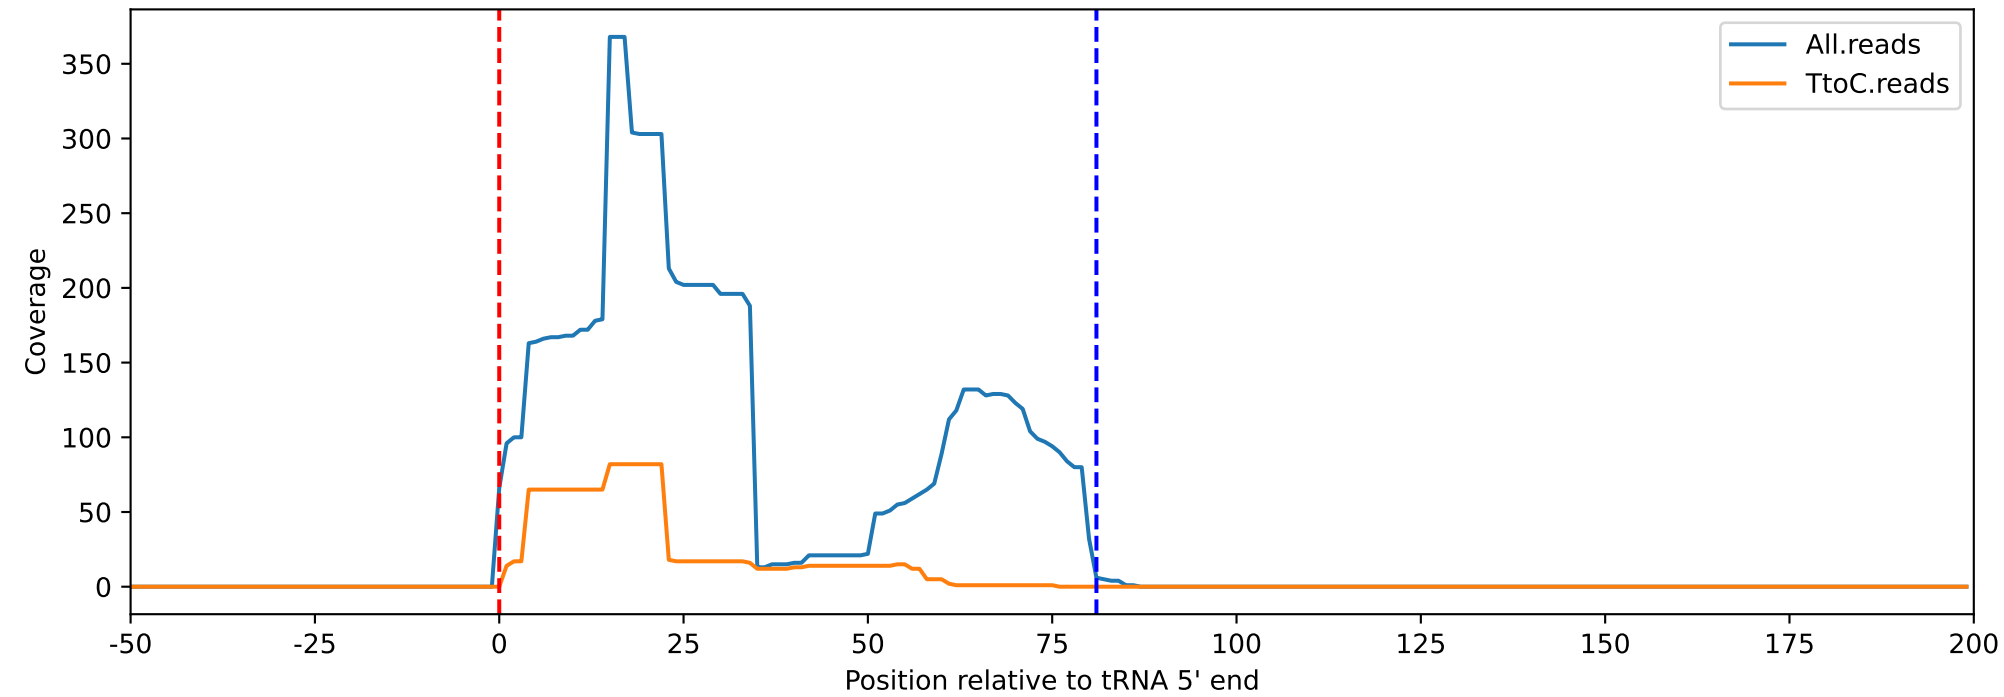

## PAR-CLIP (CCA)

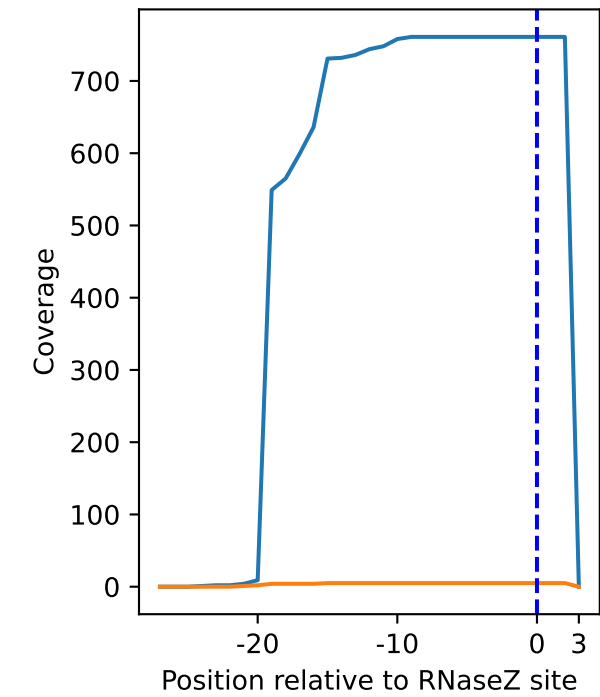

# tRNA-Arg-TCT-1-1

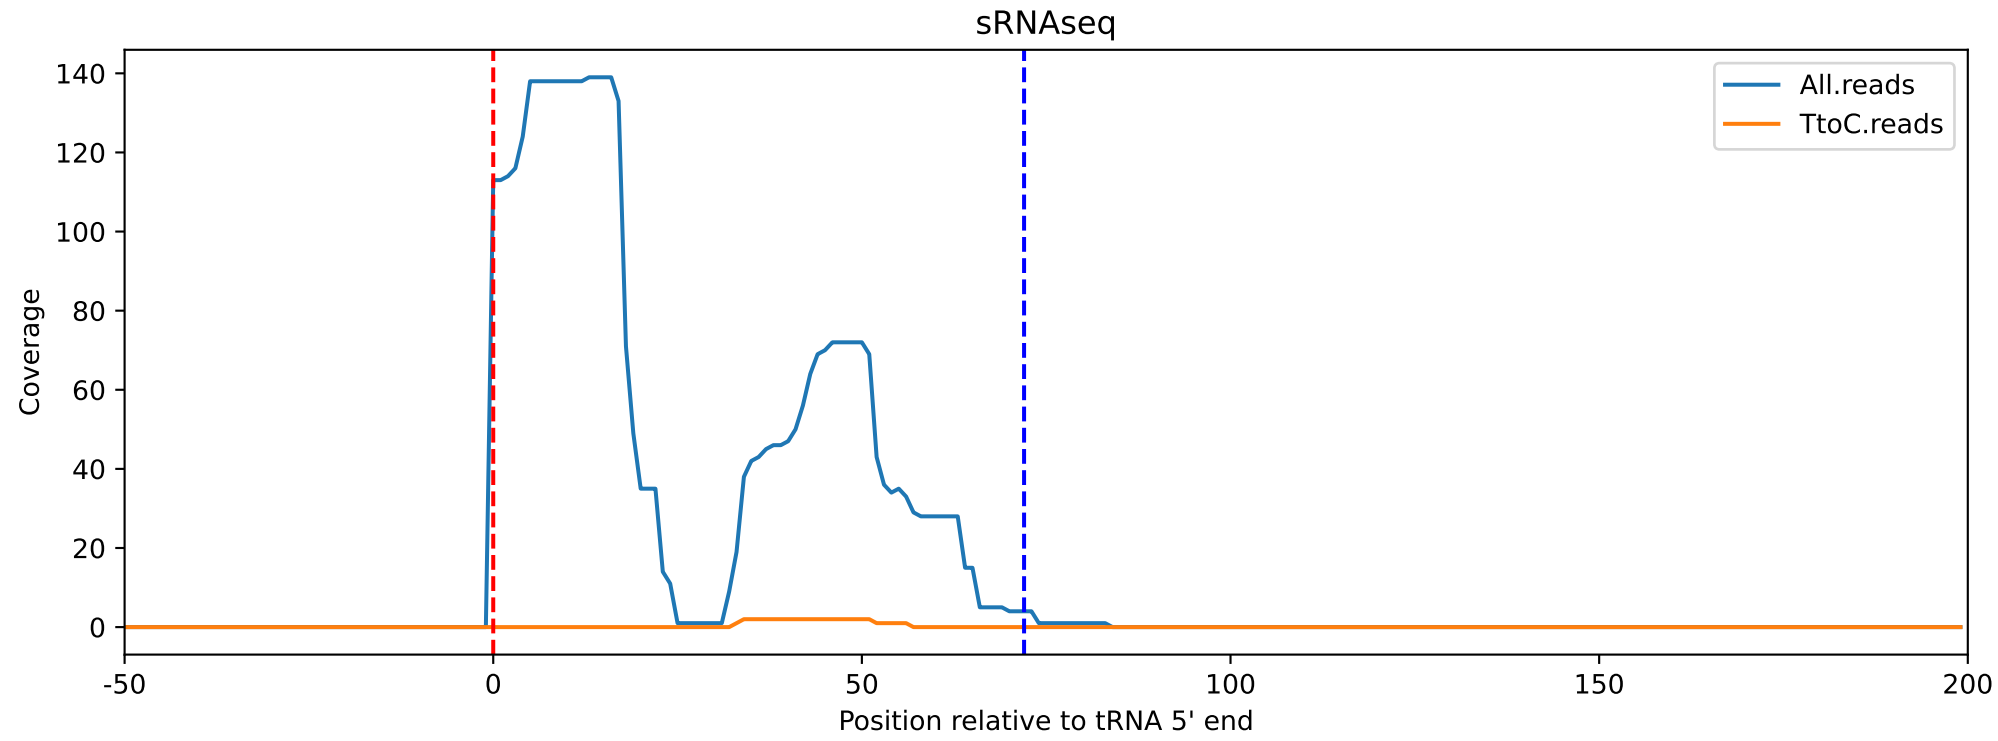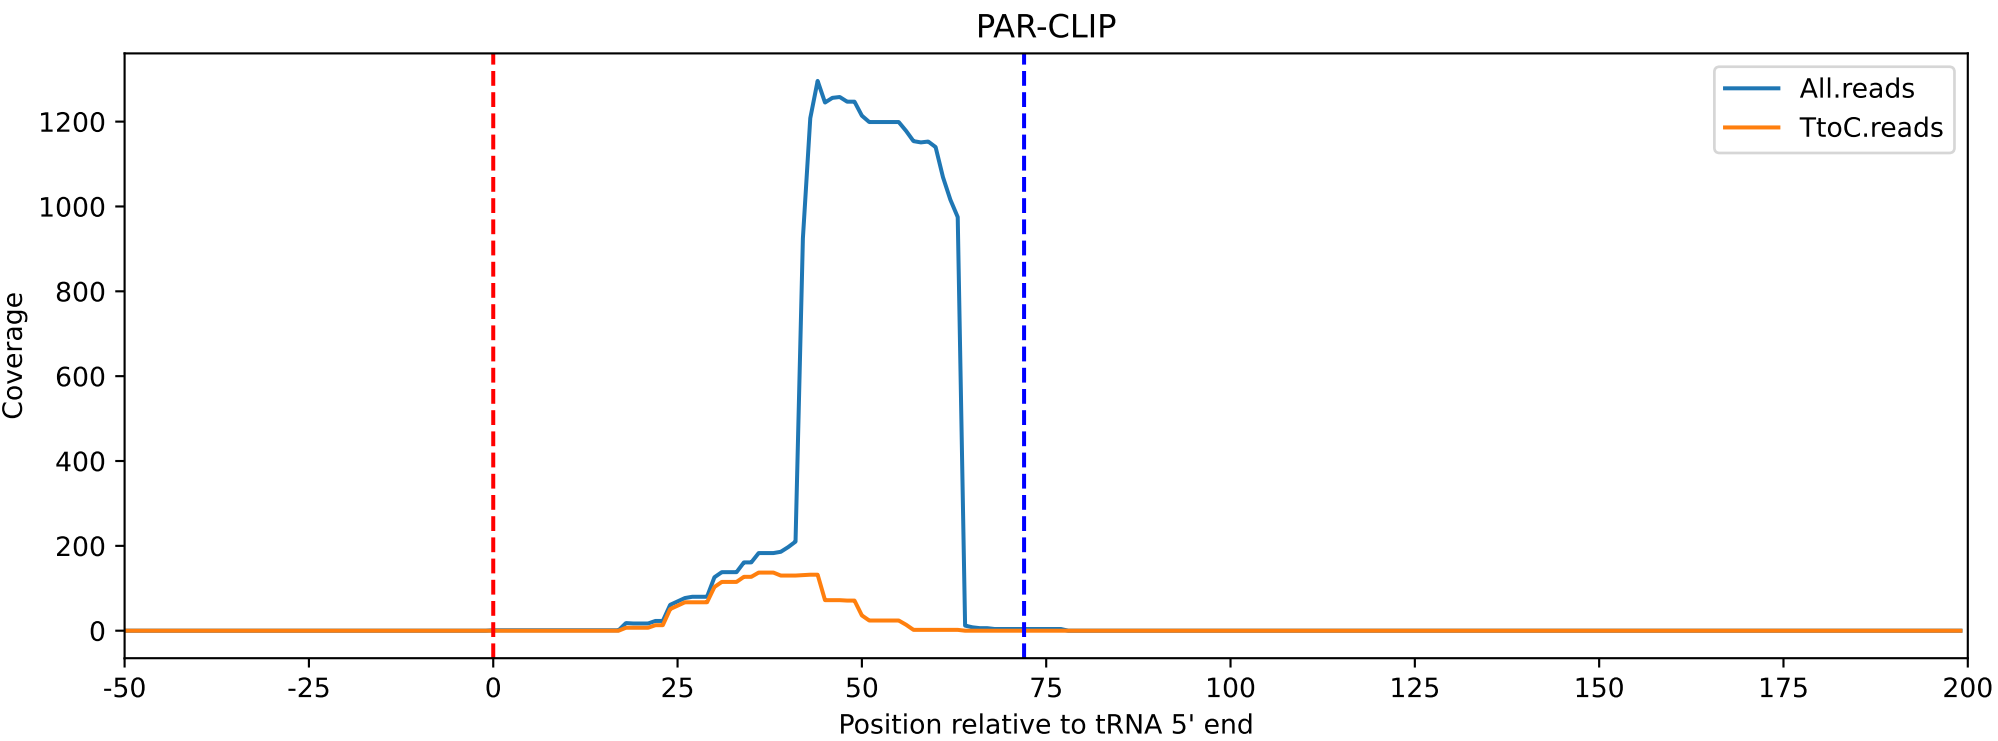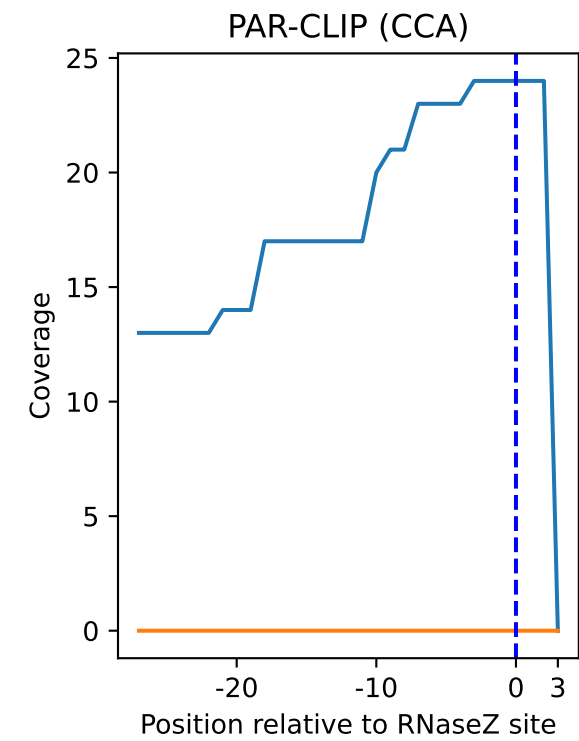

# tRNA-Ile-TAT-1-2

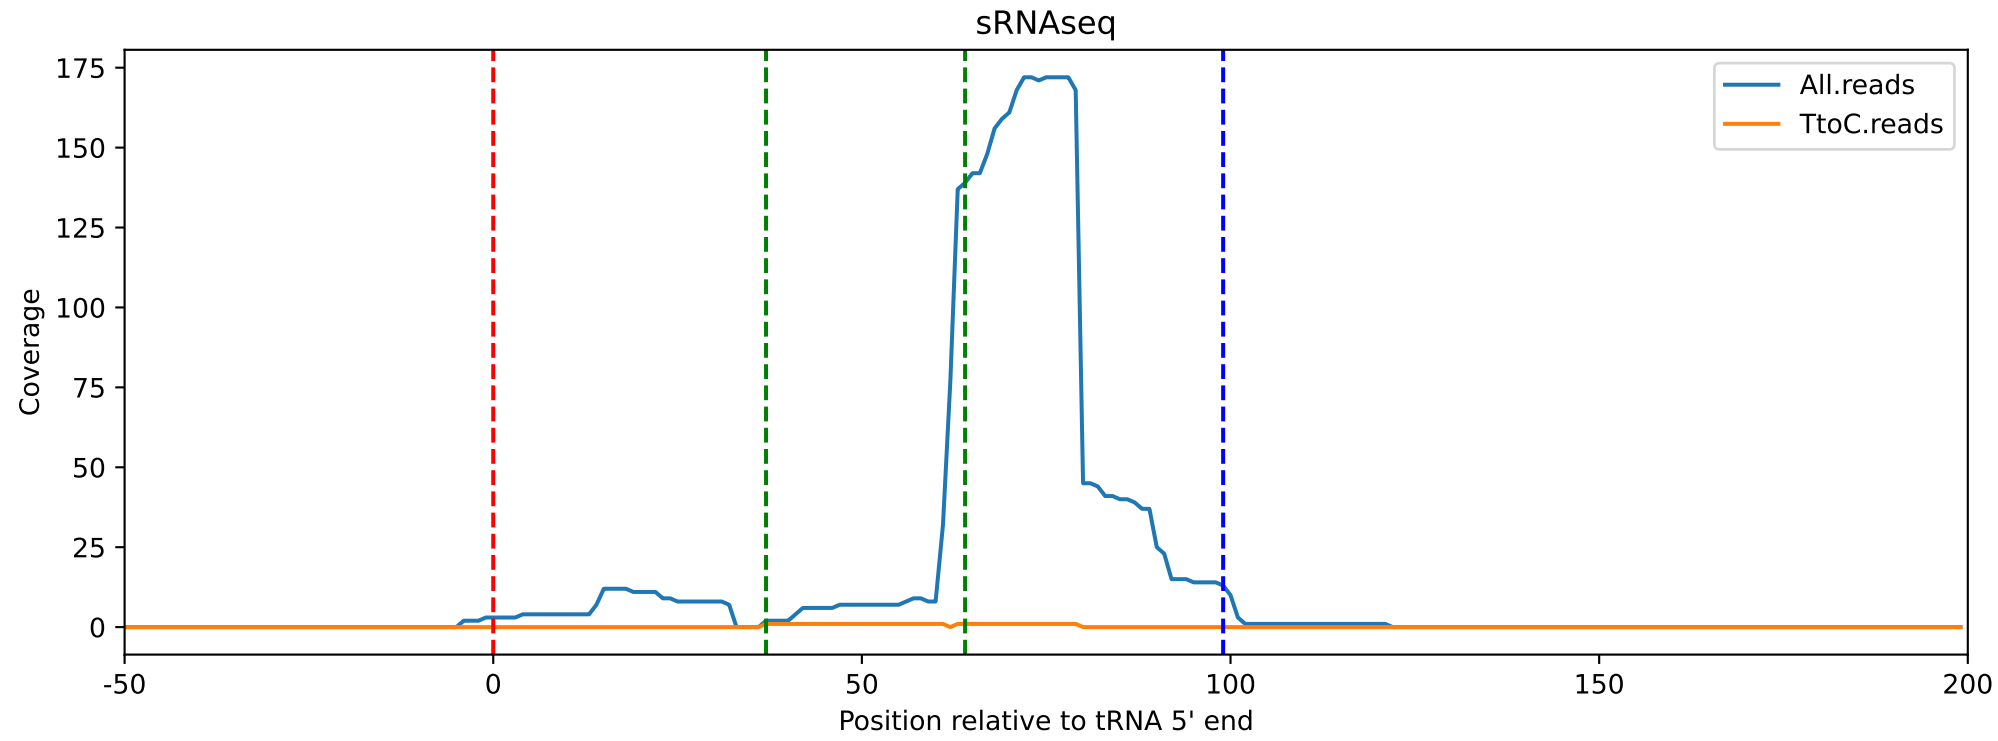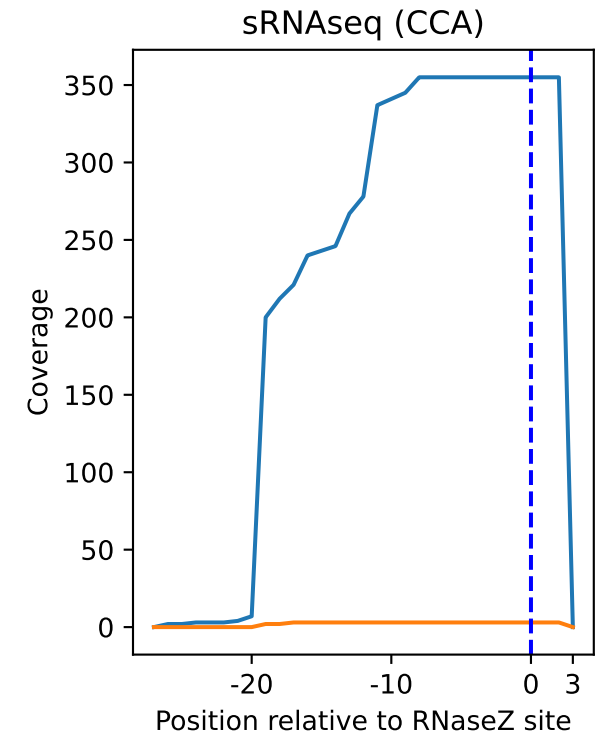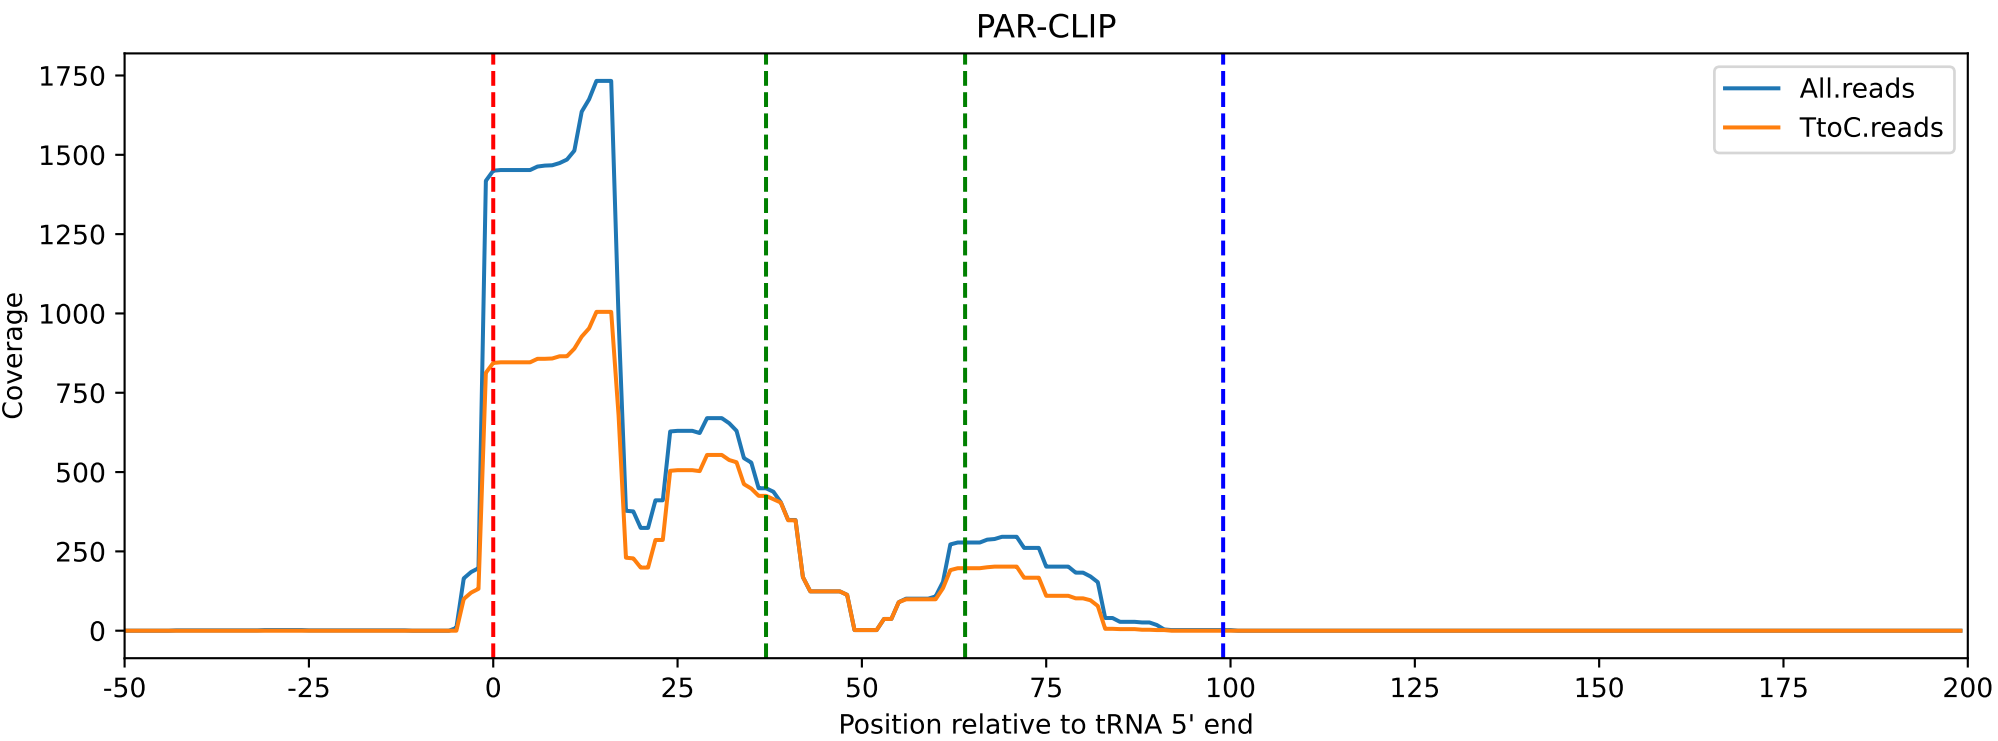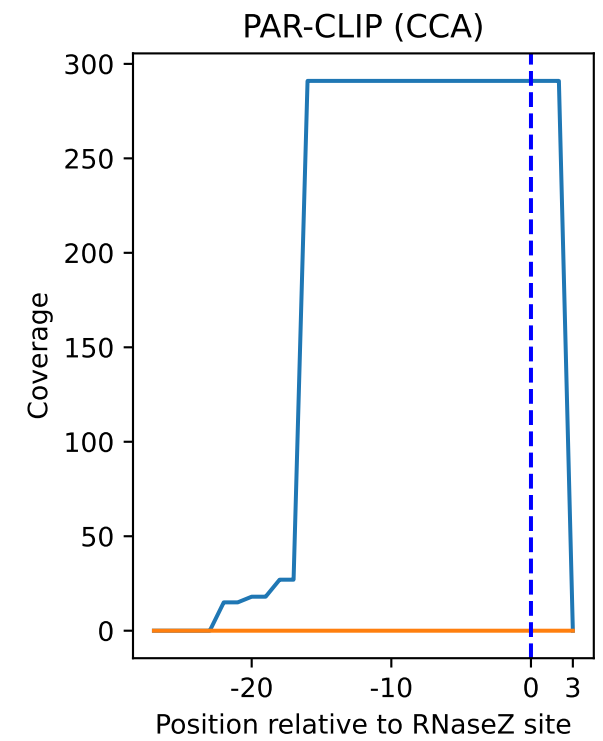



# tRNA-iMet-CAT-1-4

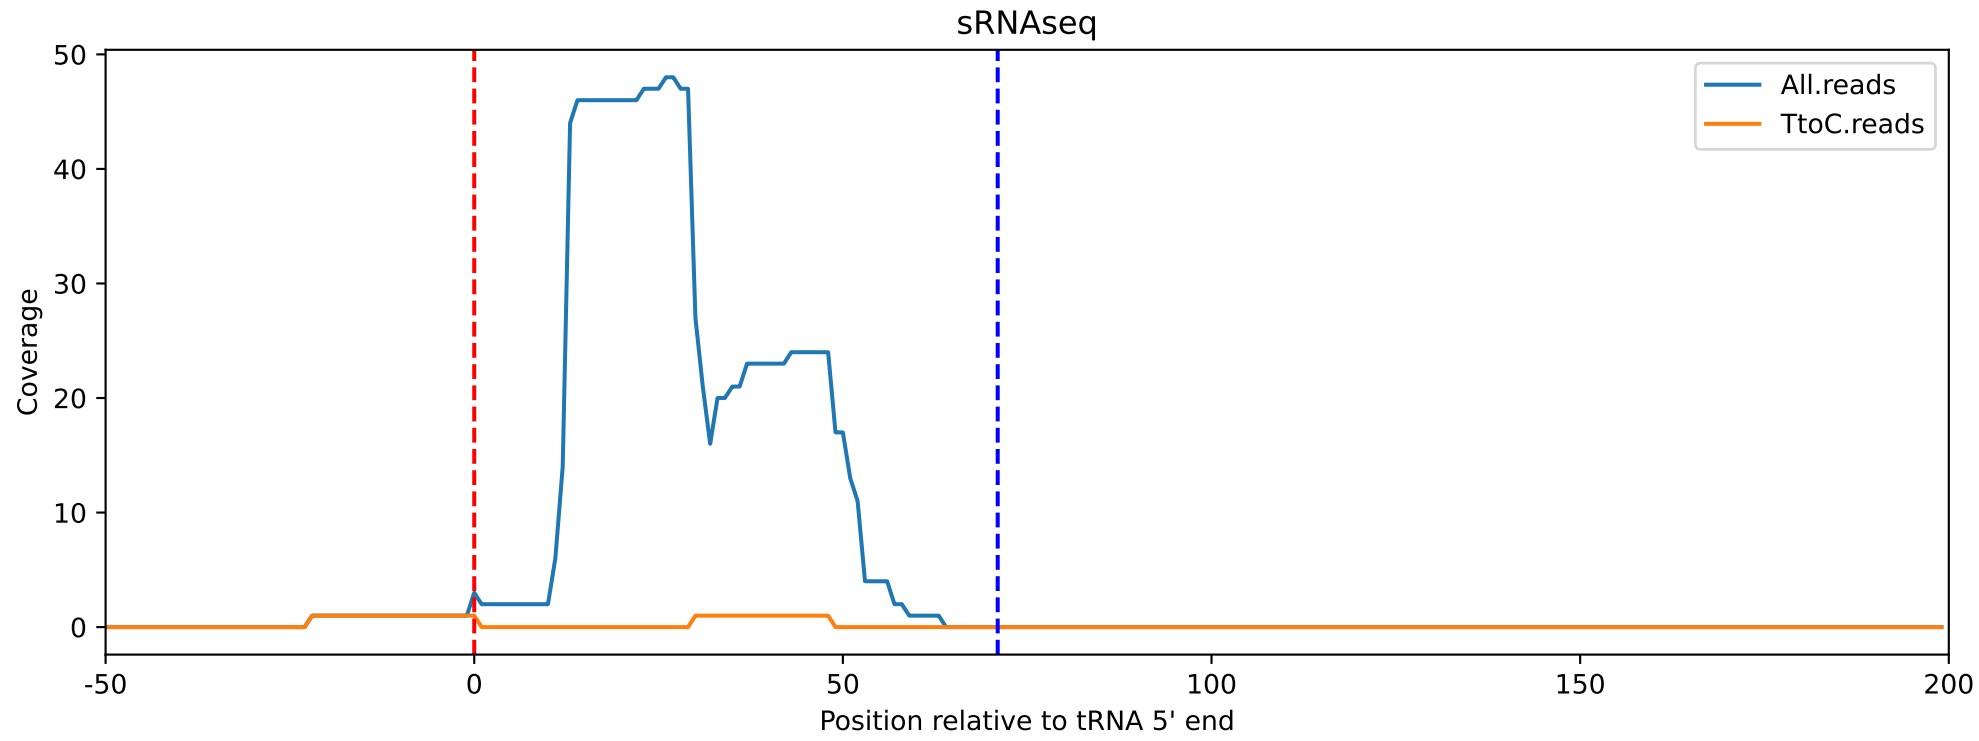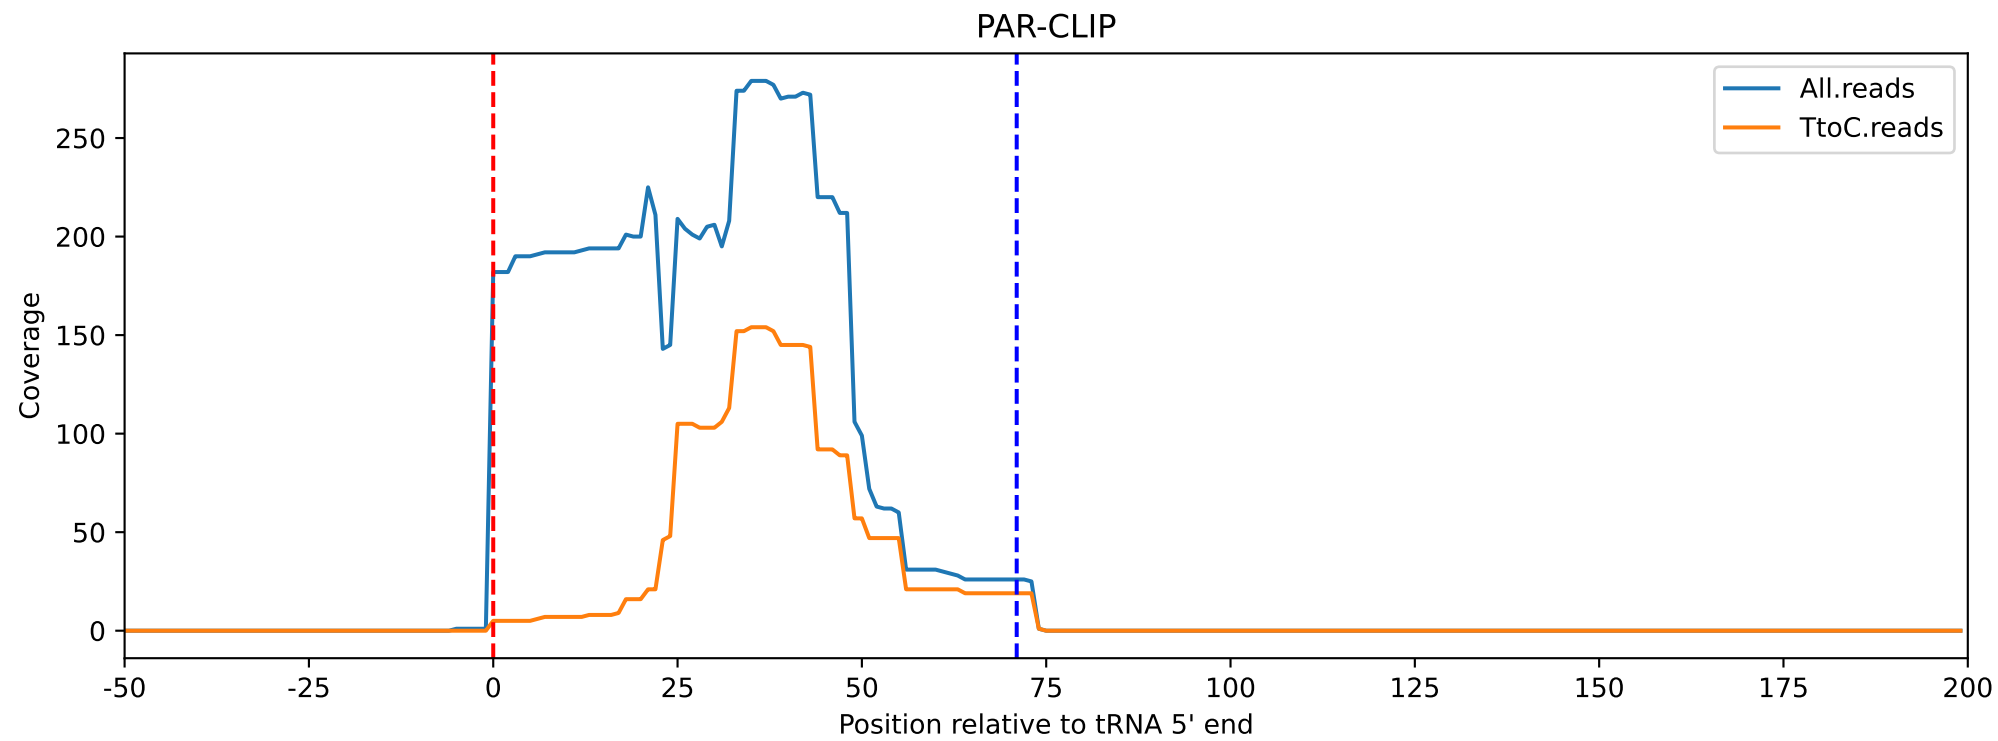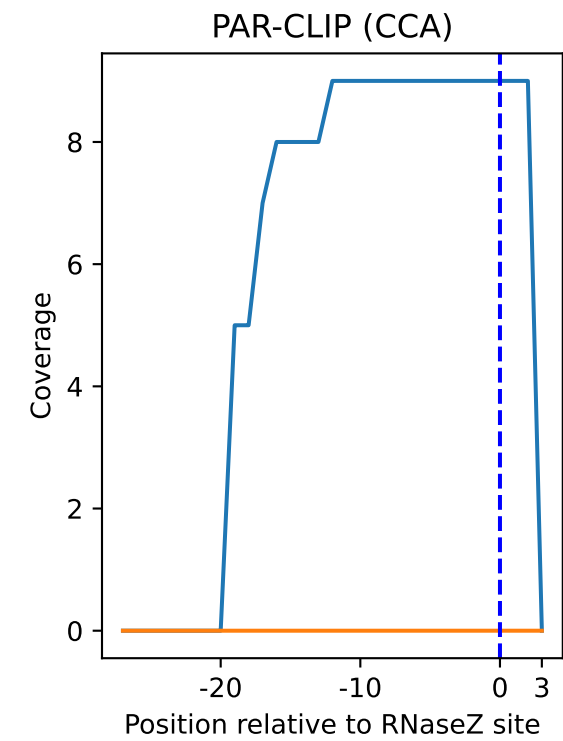

# tRNA-Gln-TTG-1-3

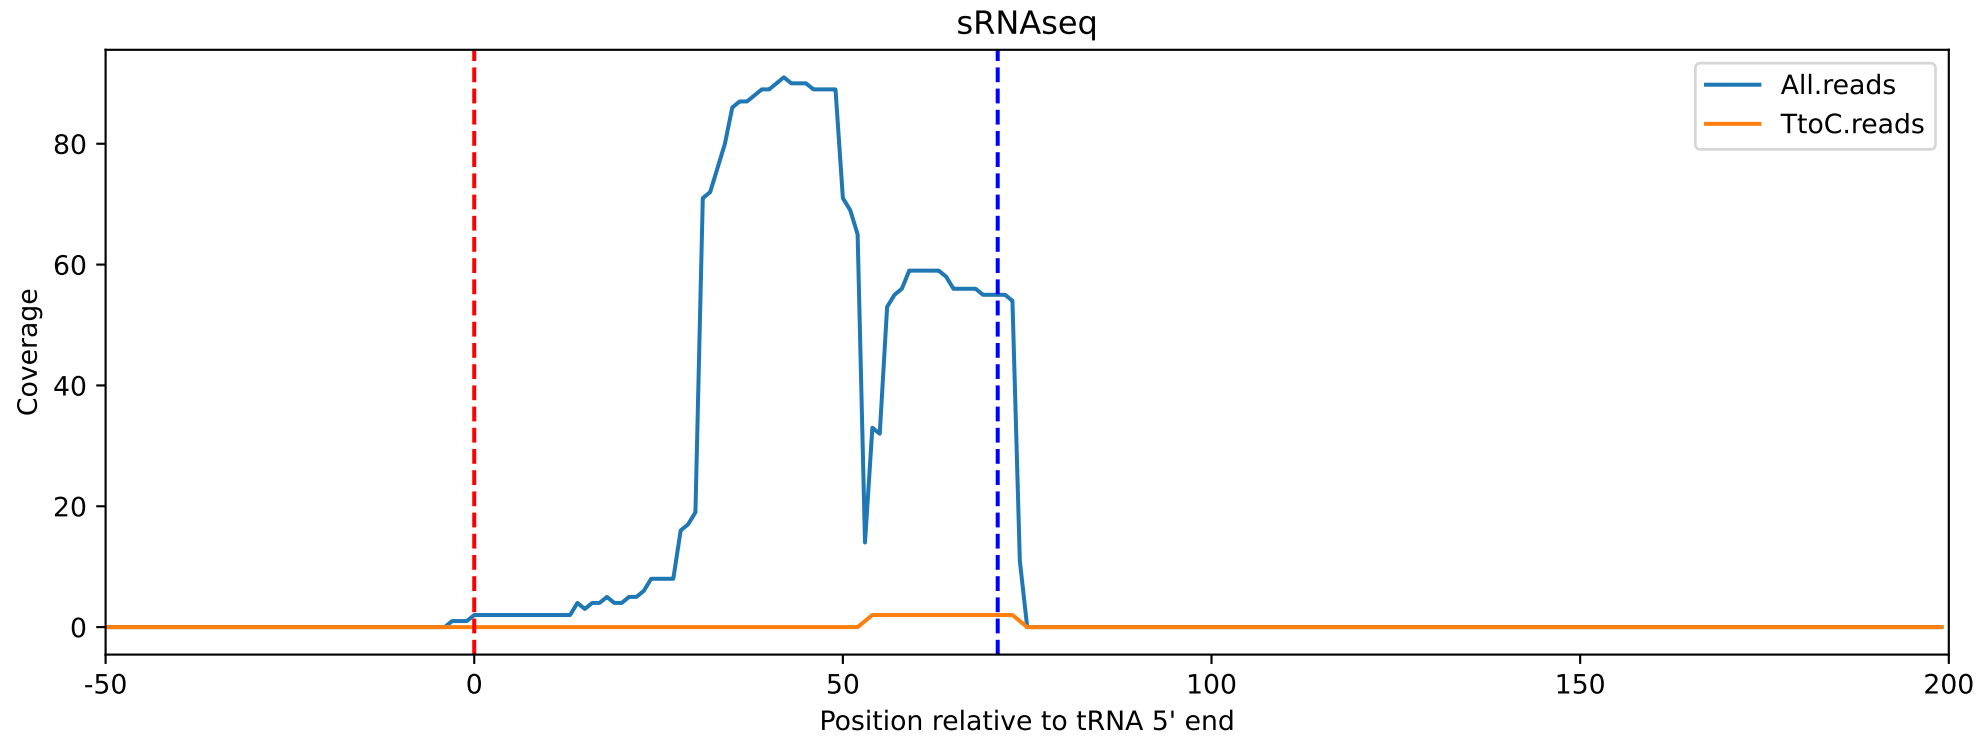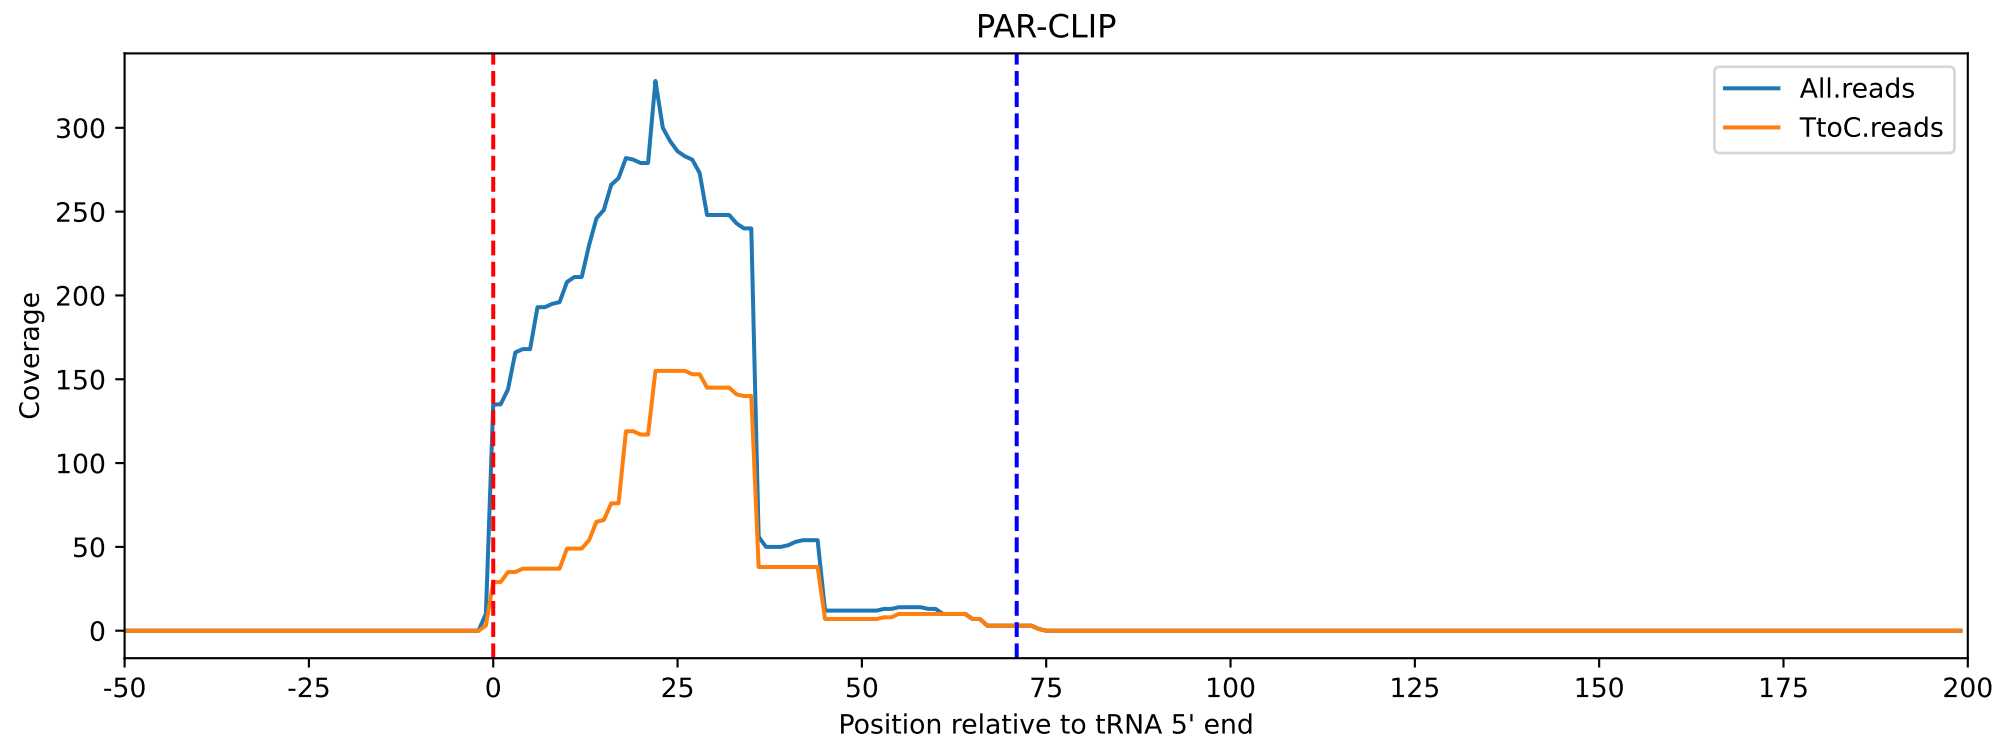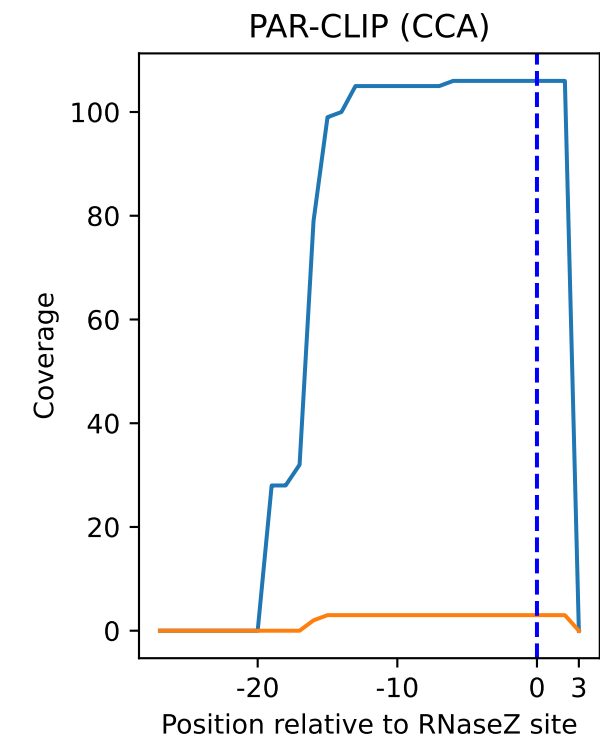

# tRNA-Ser-AGA-2-1

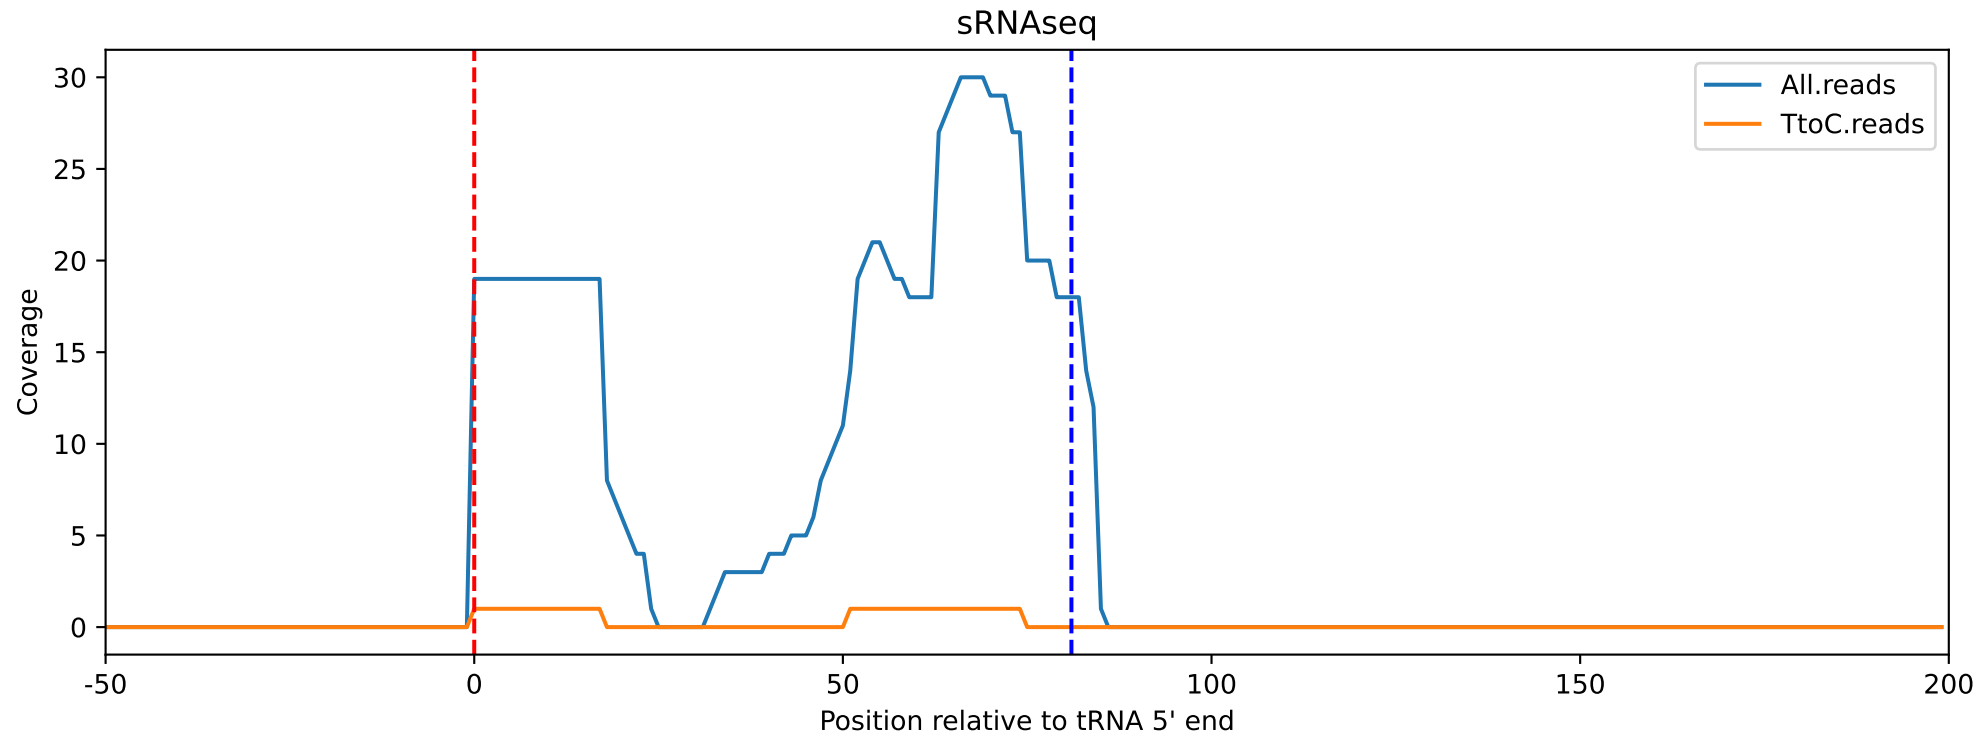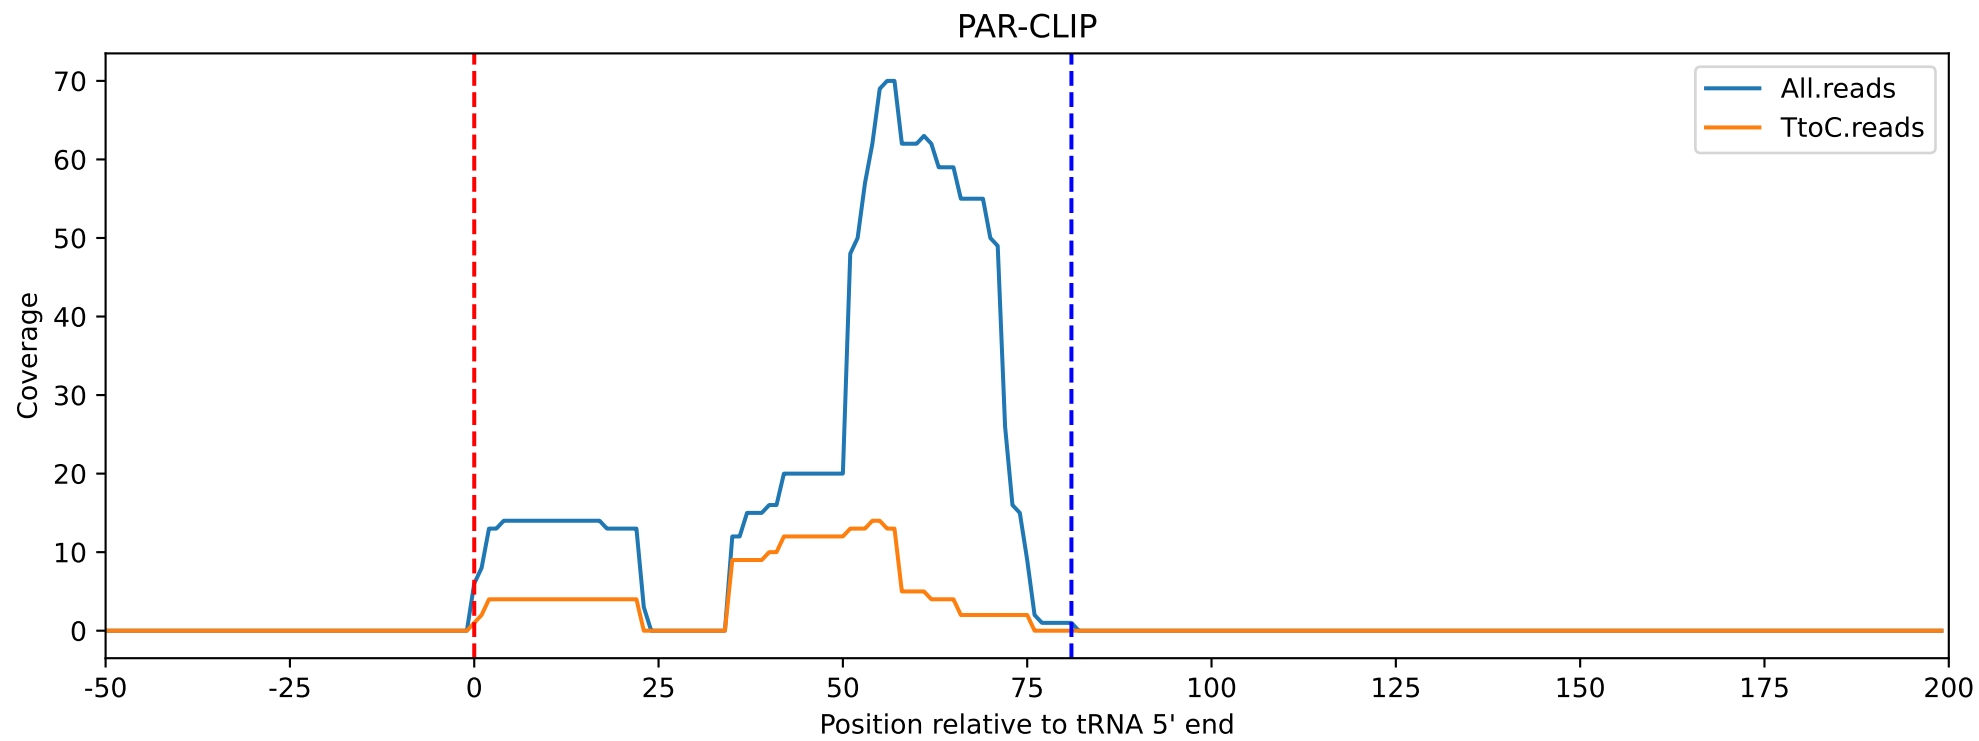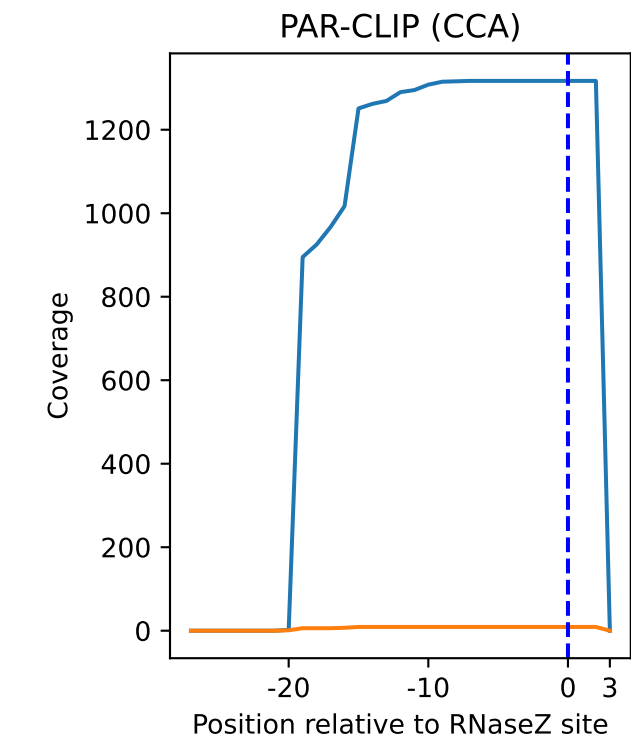

# tRNA-Lys-CTT-1-5

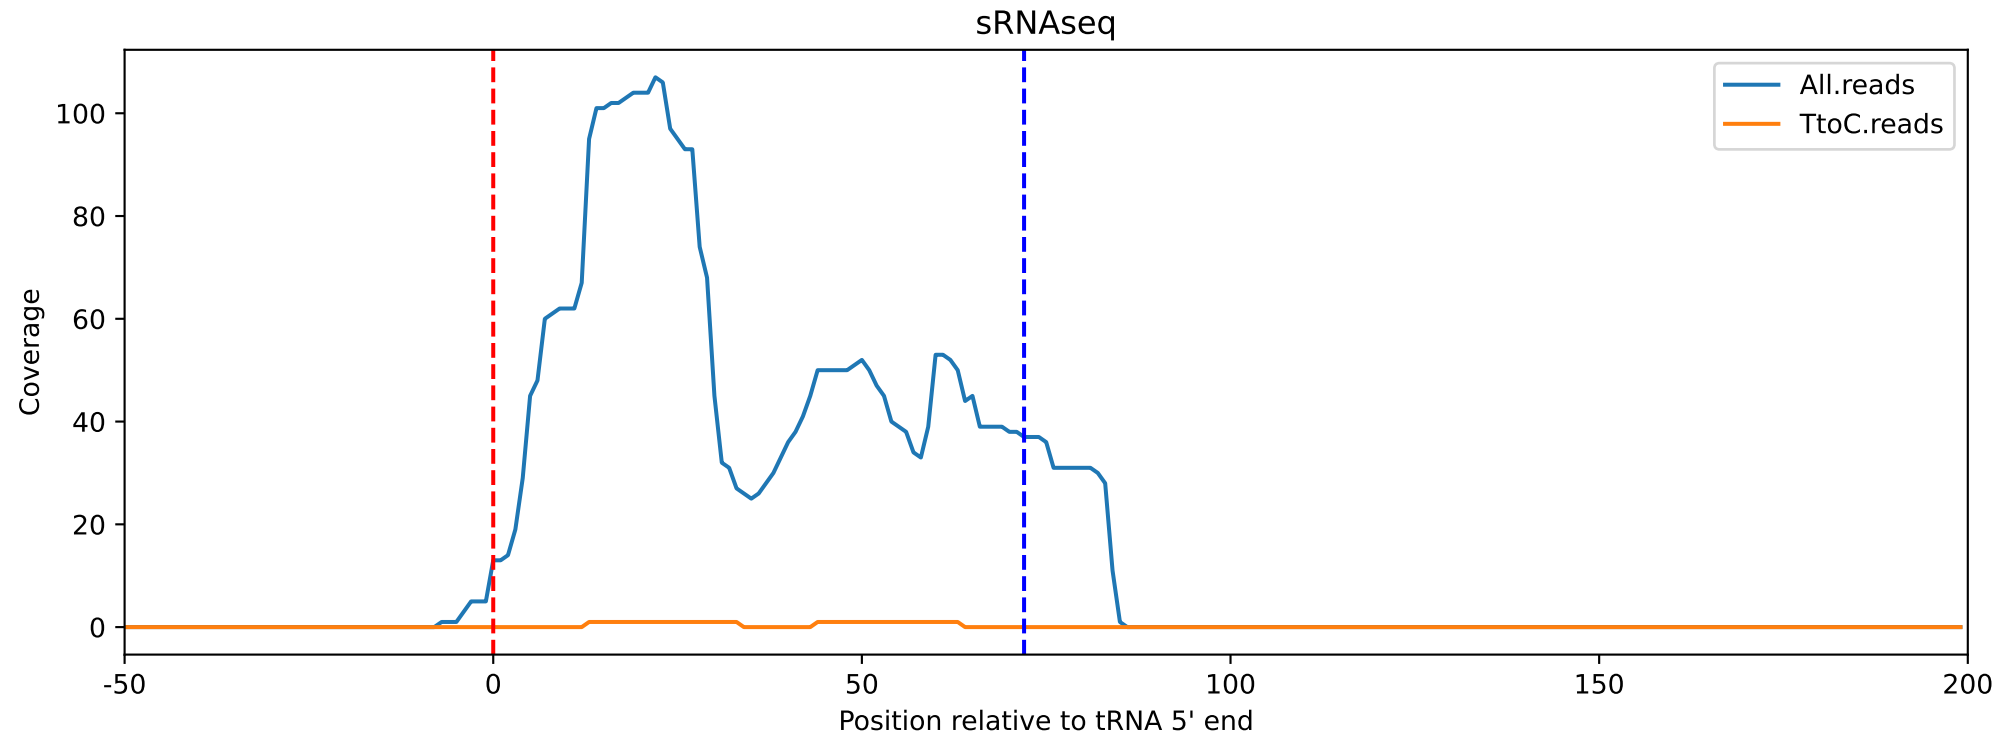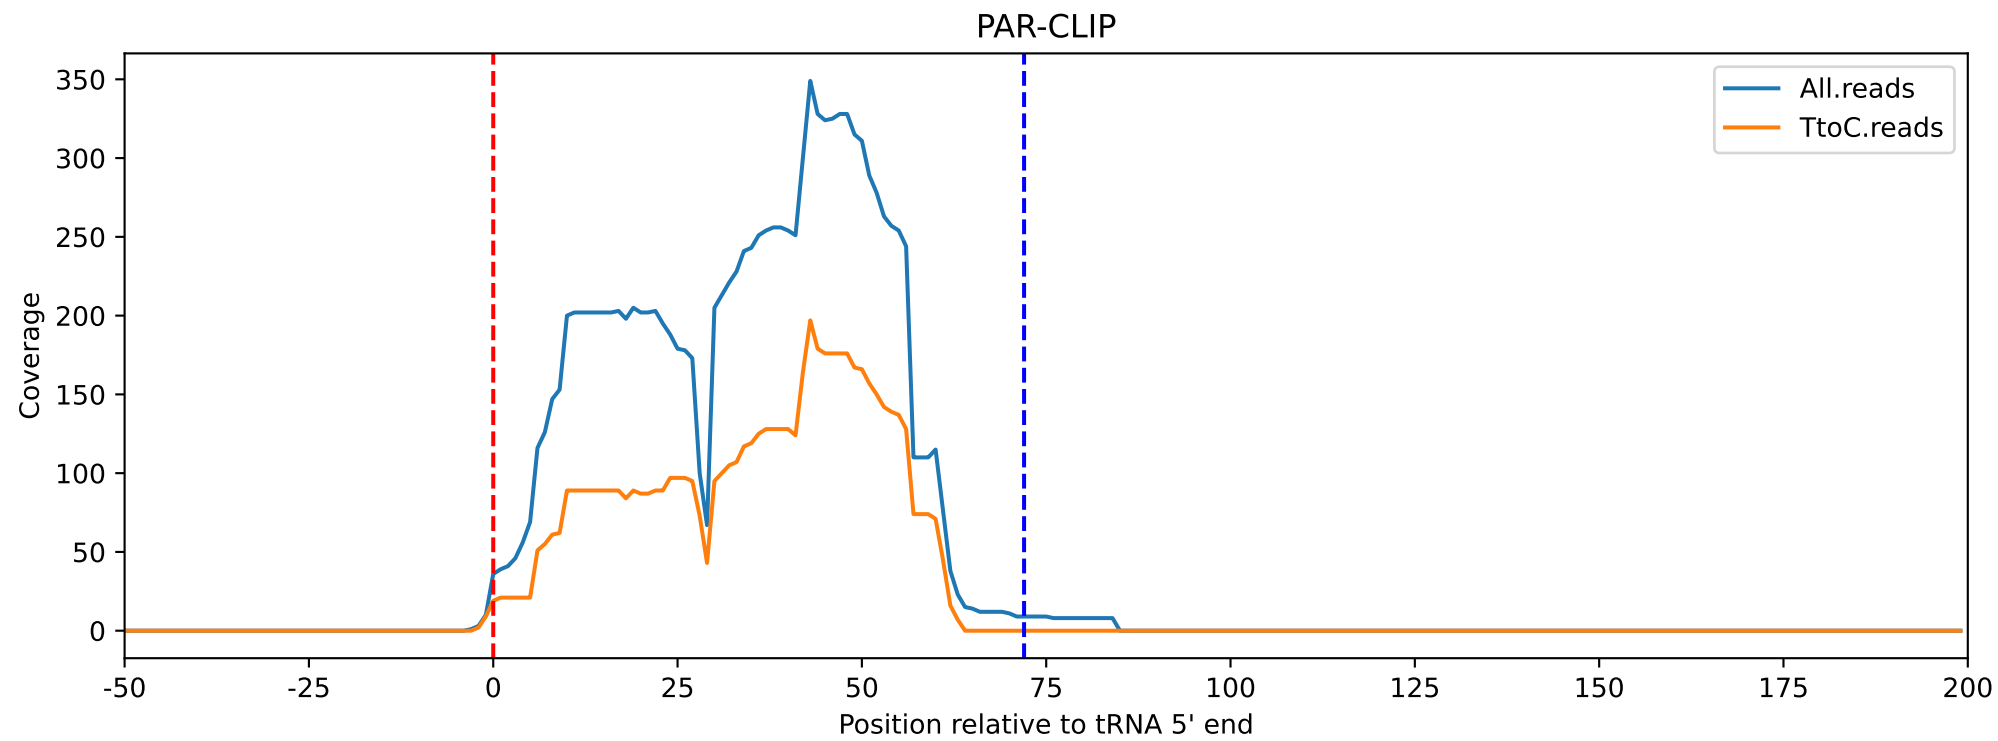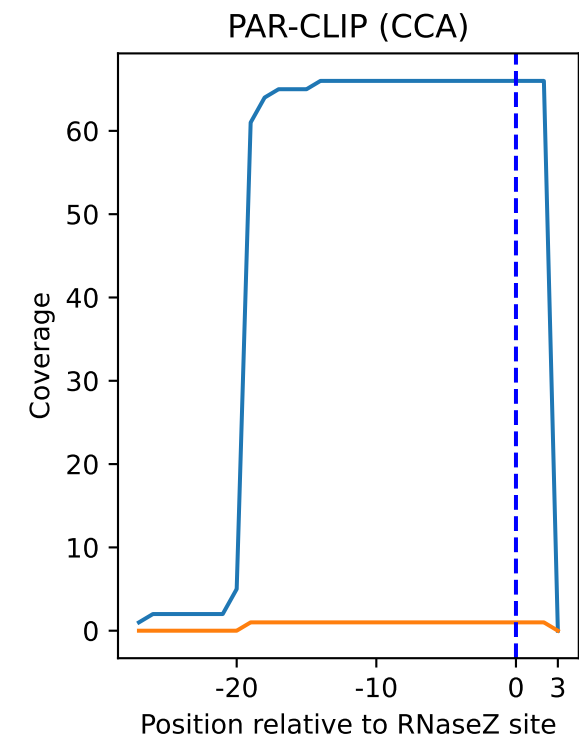

# tRNA-Leu-CAG-1-3

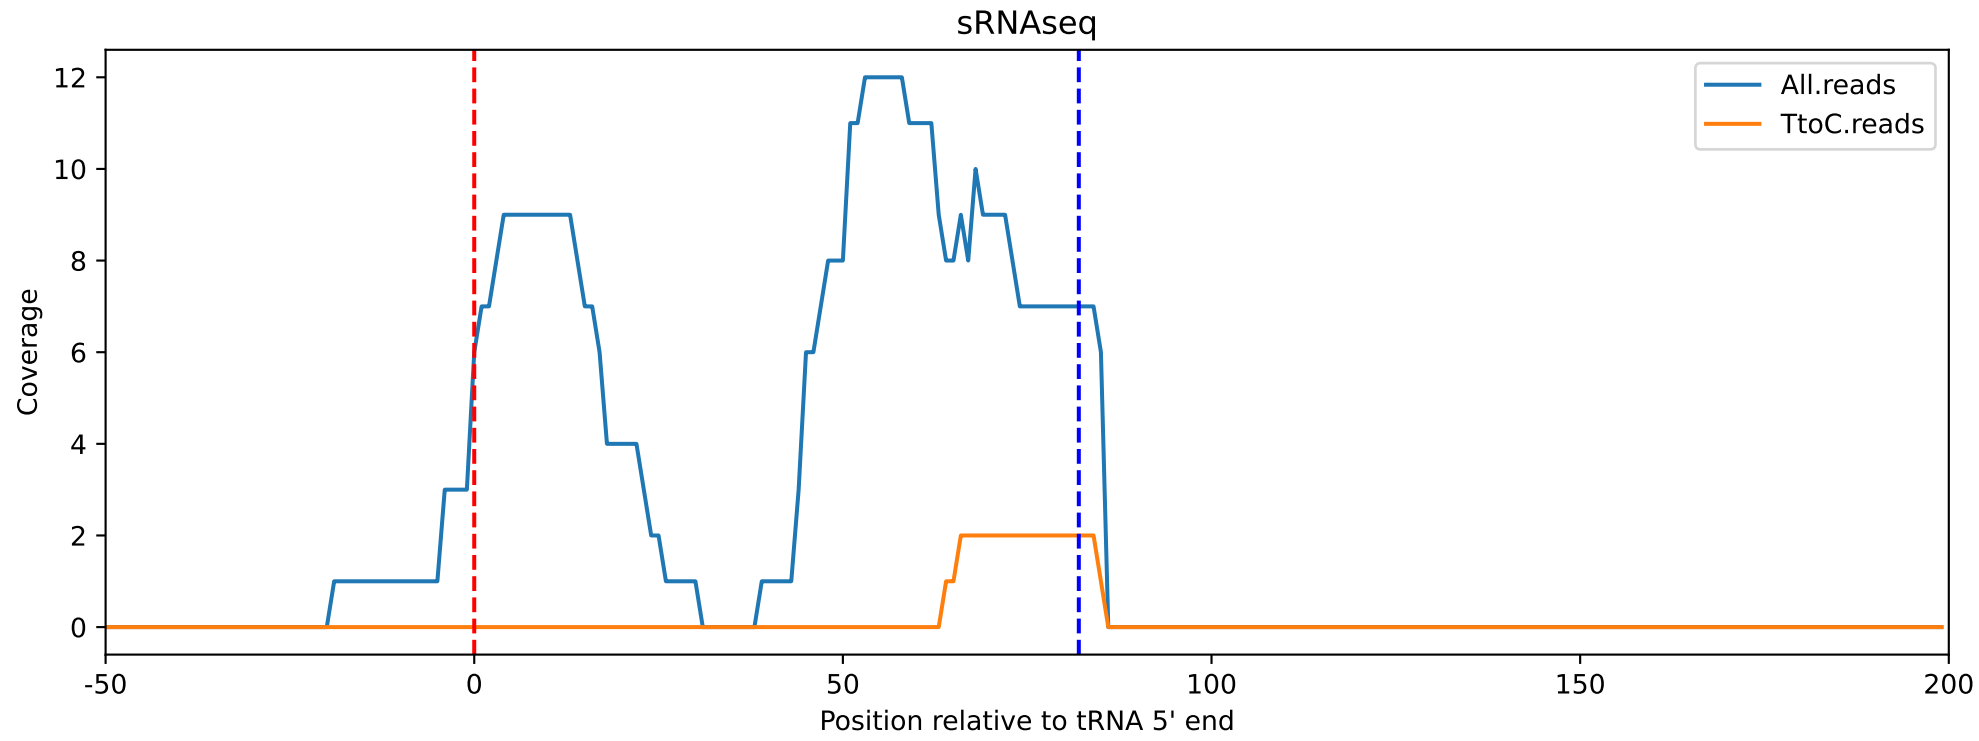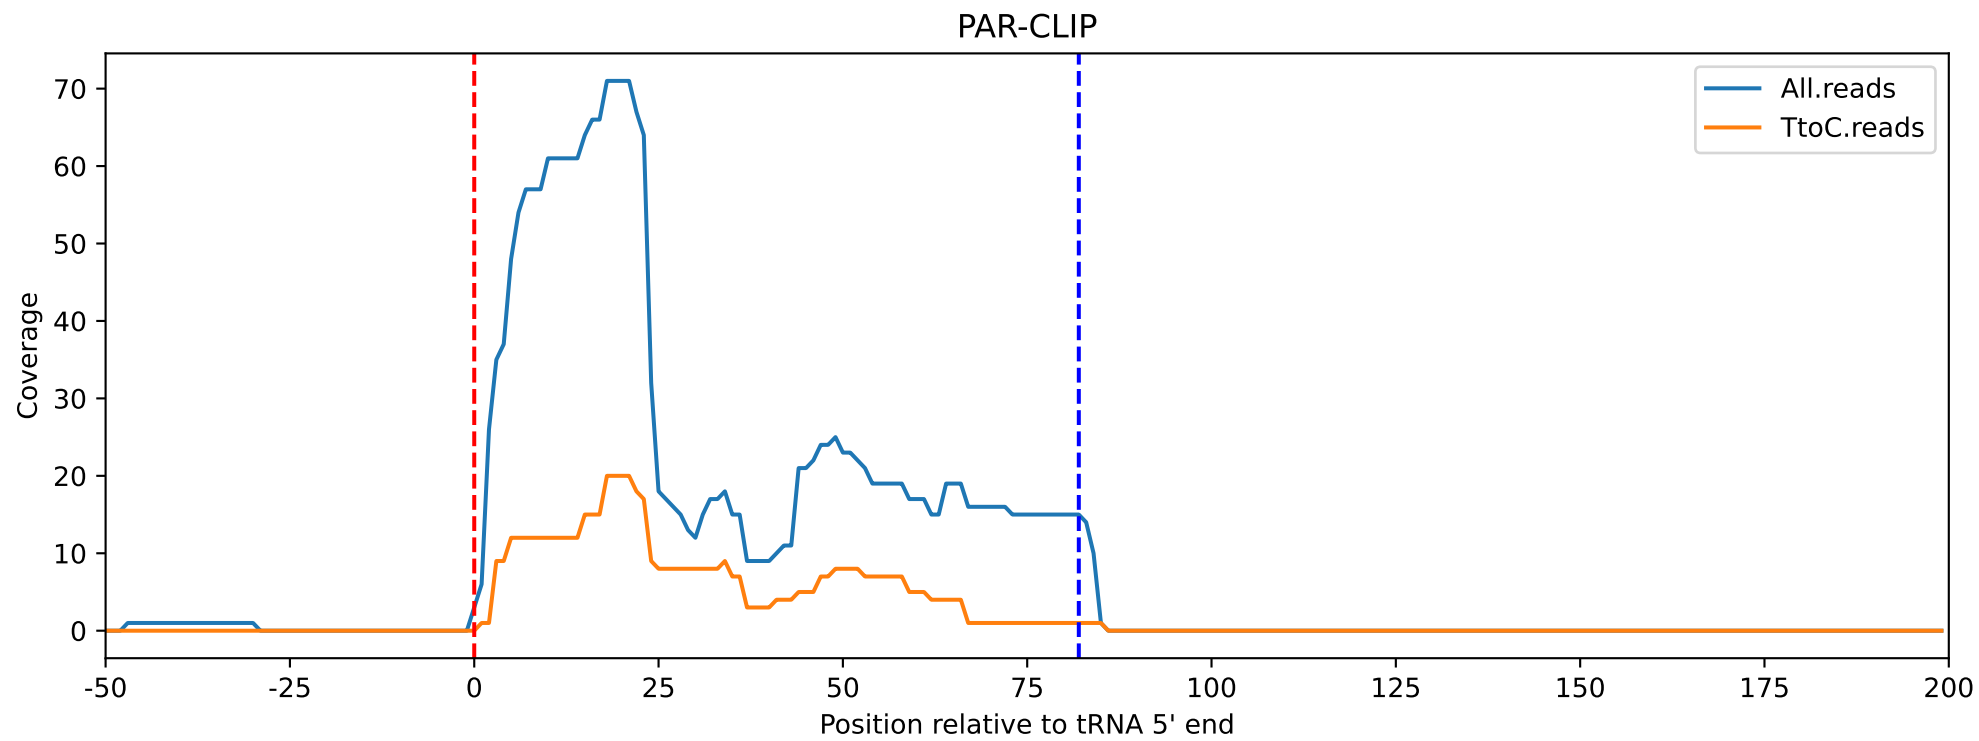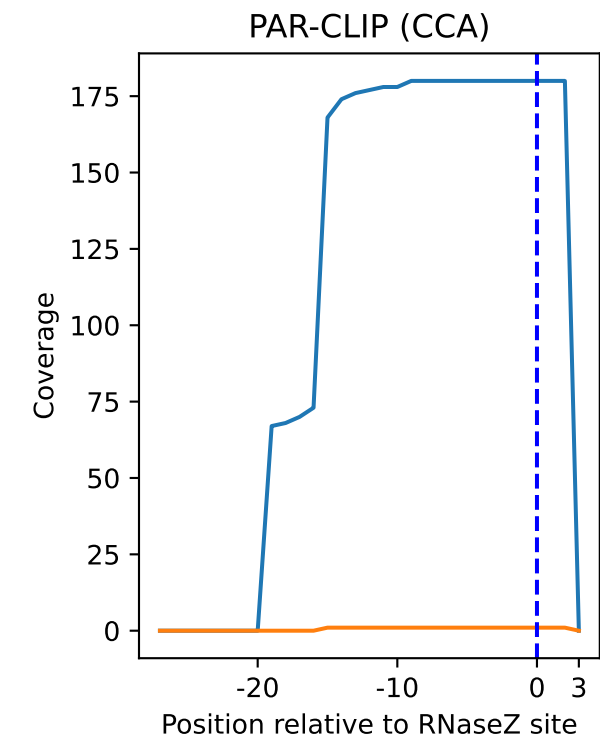

# tRNA-Leu-CAG-1-7

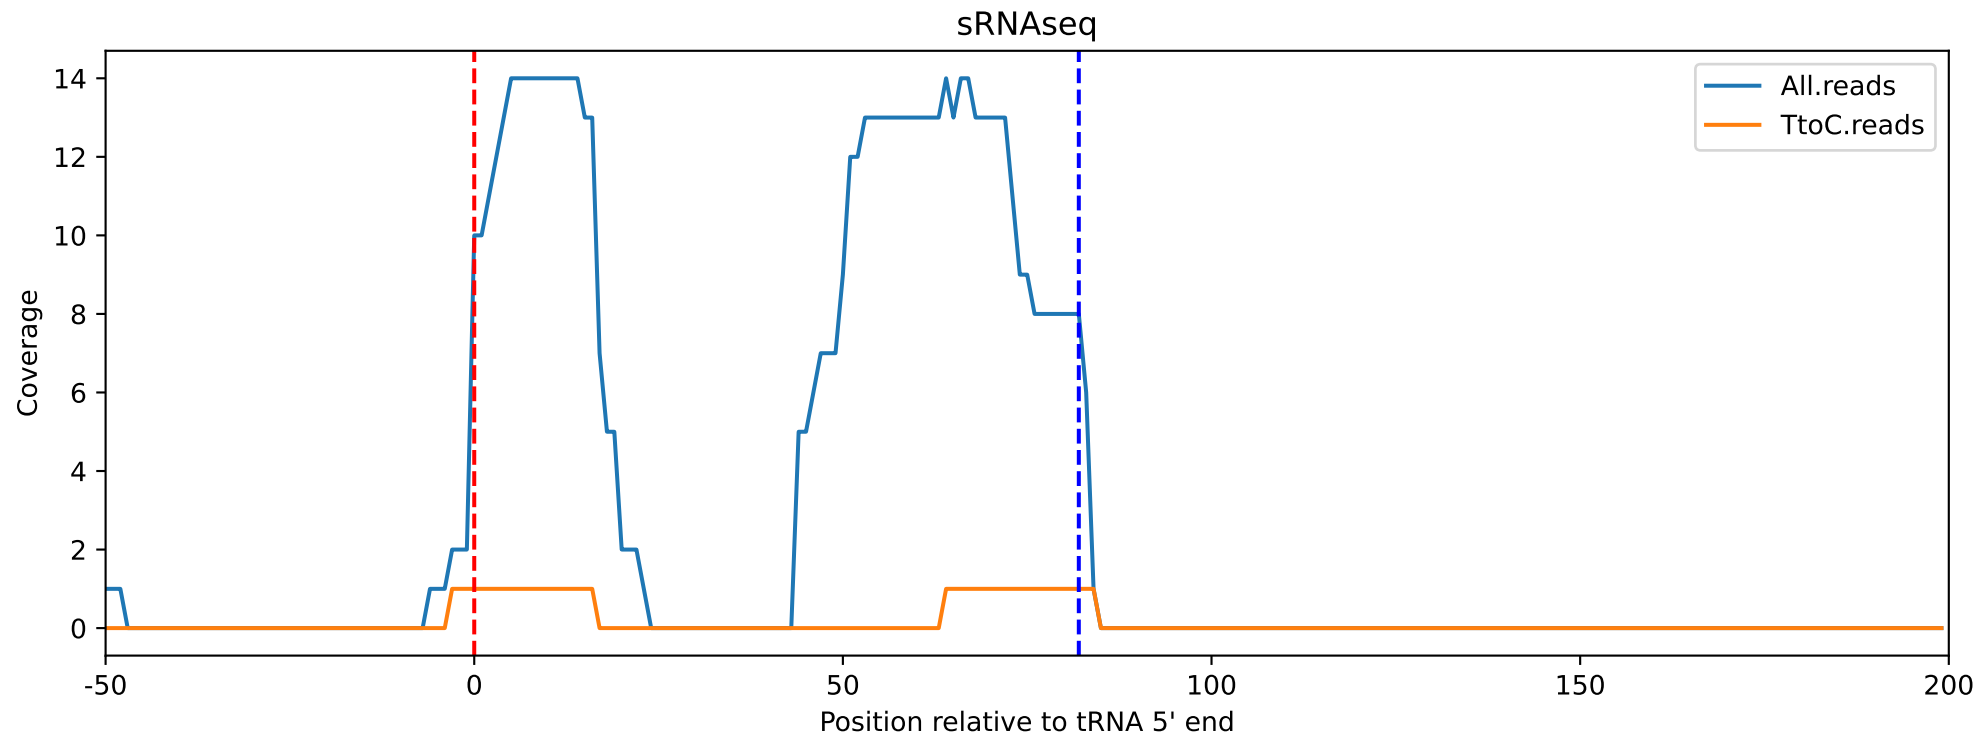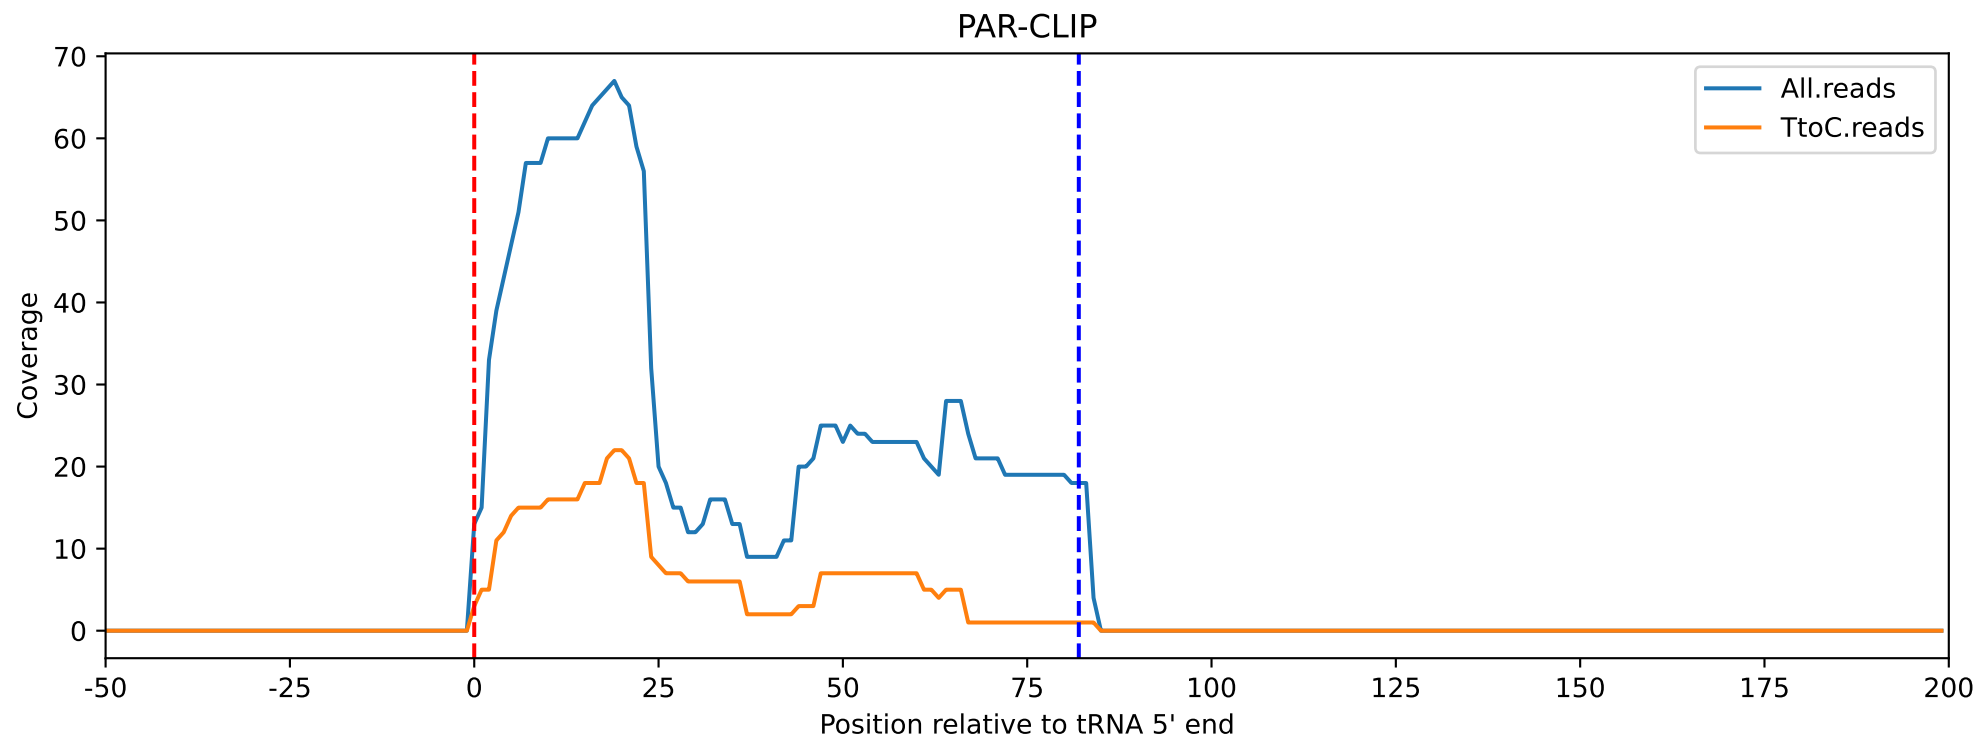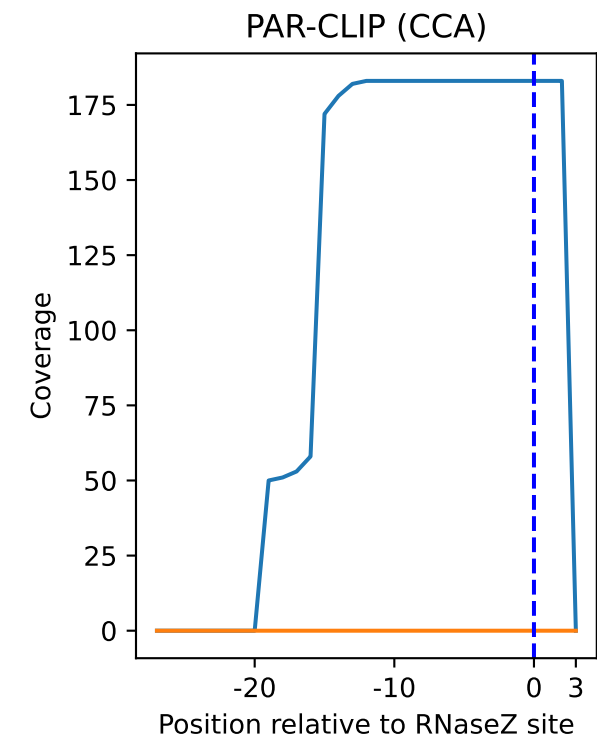

# tRNA-Ala-AGC-2-3

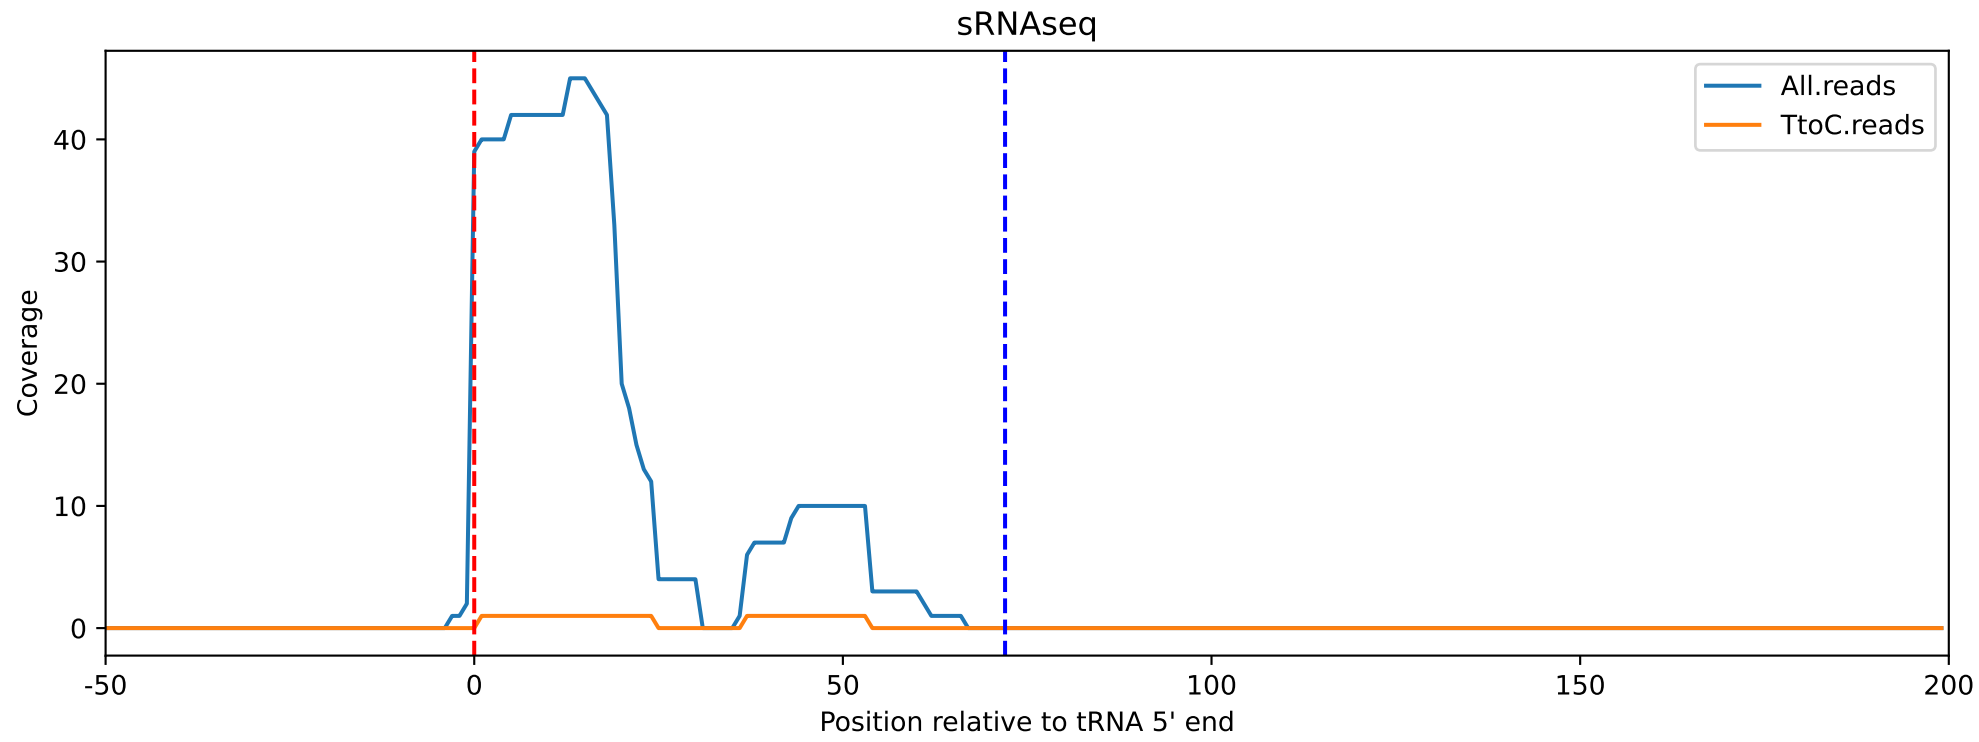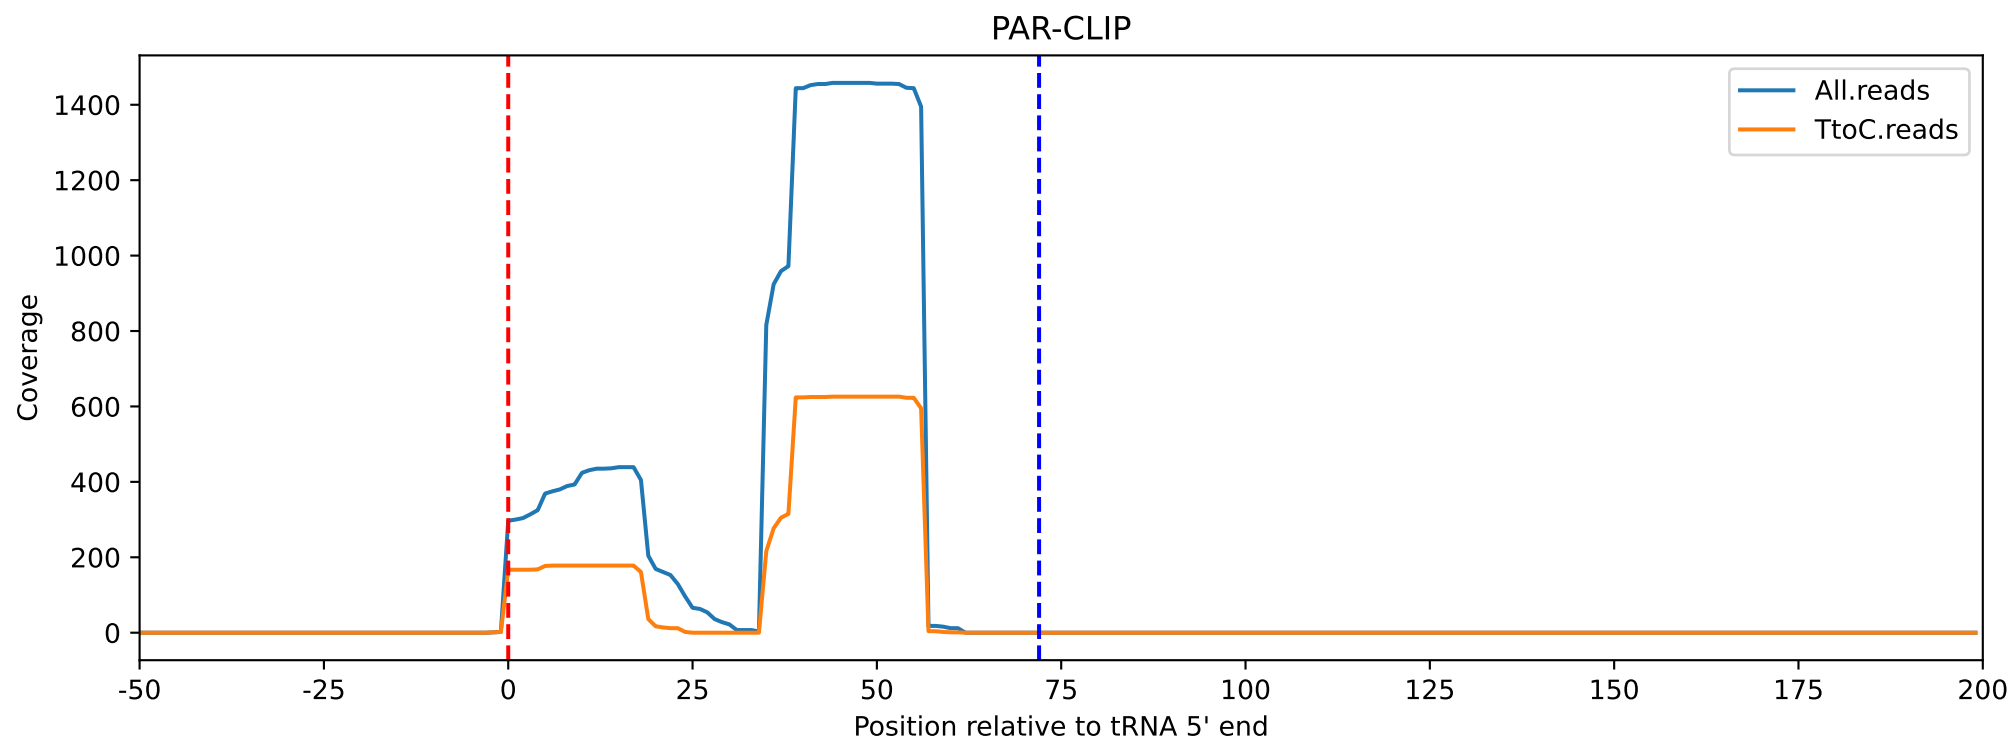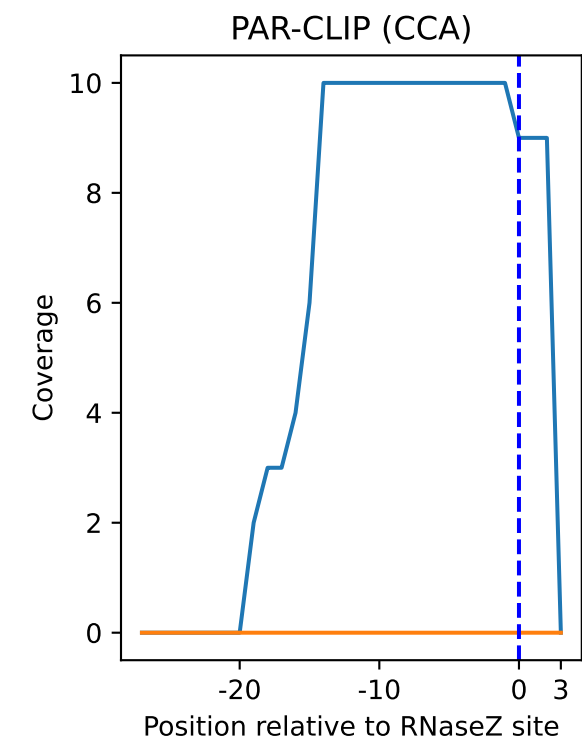

# tRNA-Asp-GTC-1-9

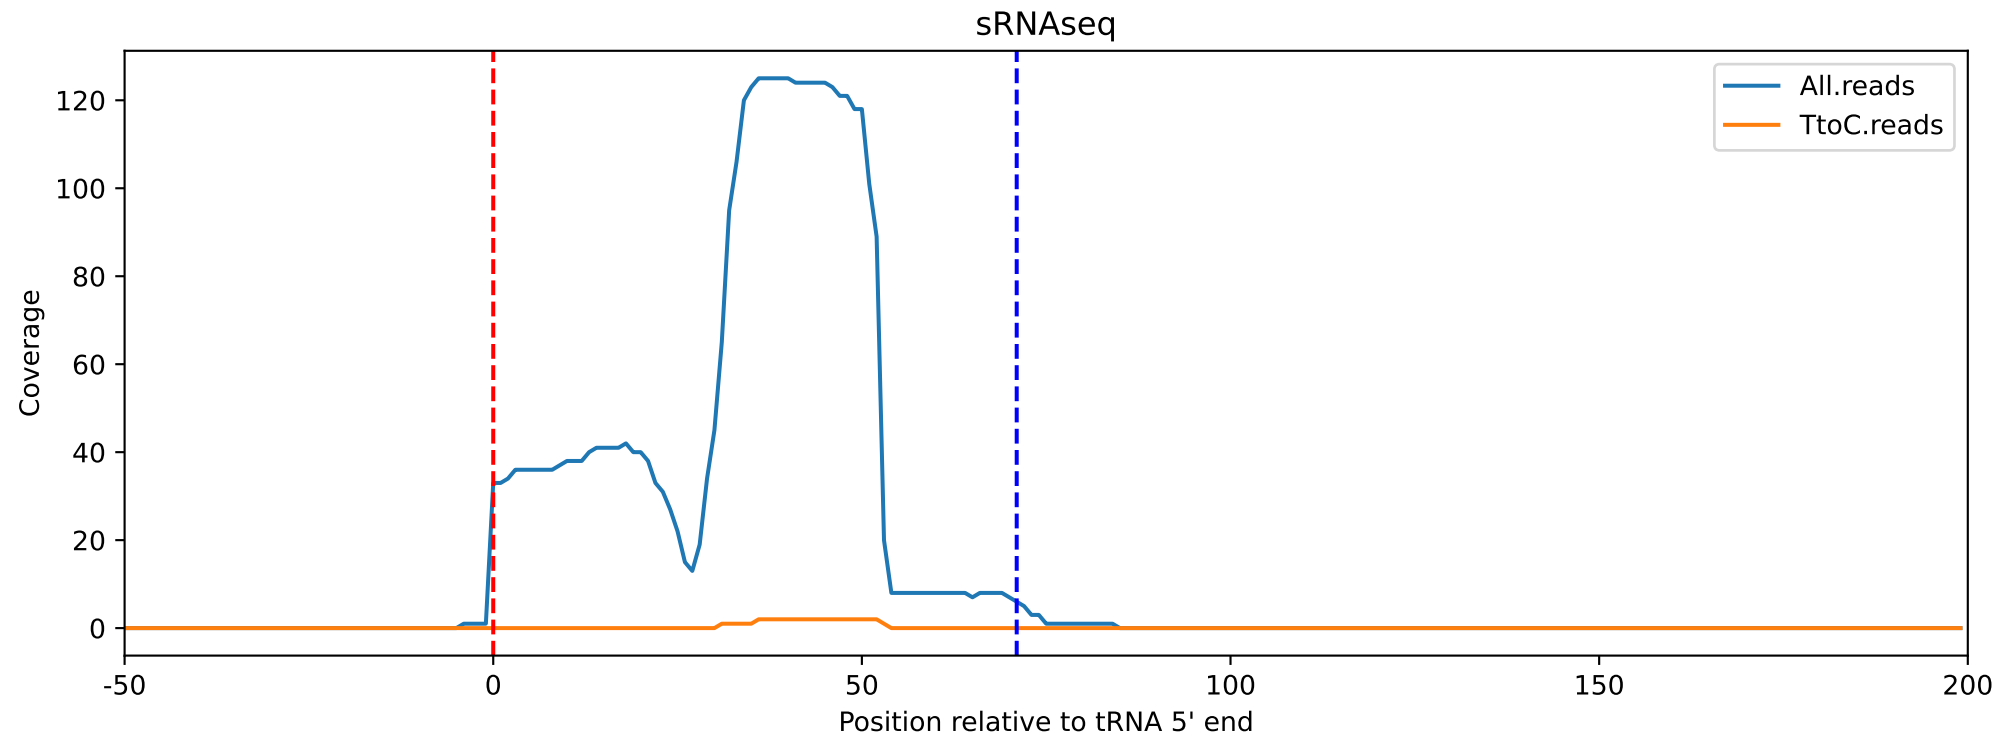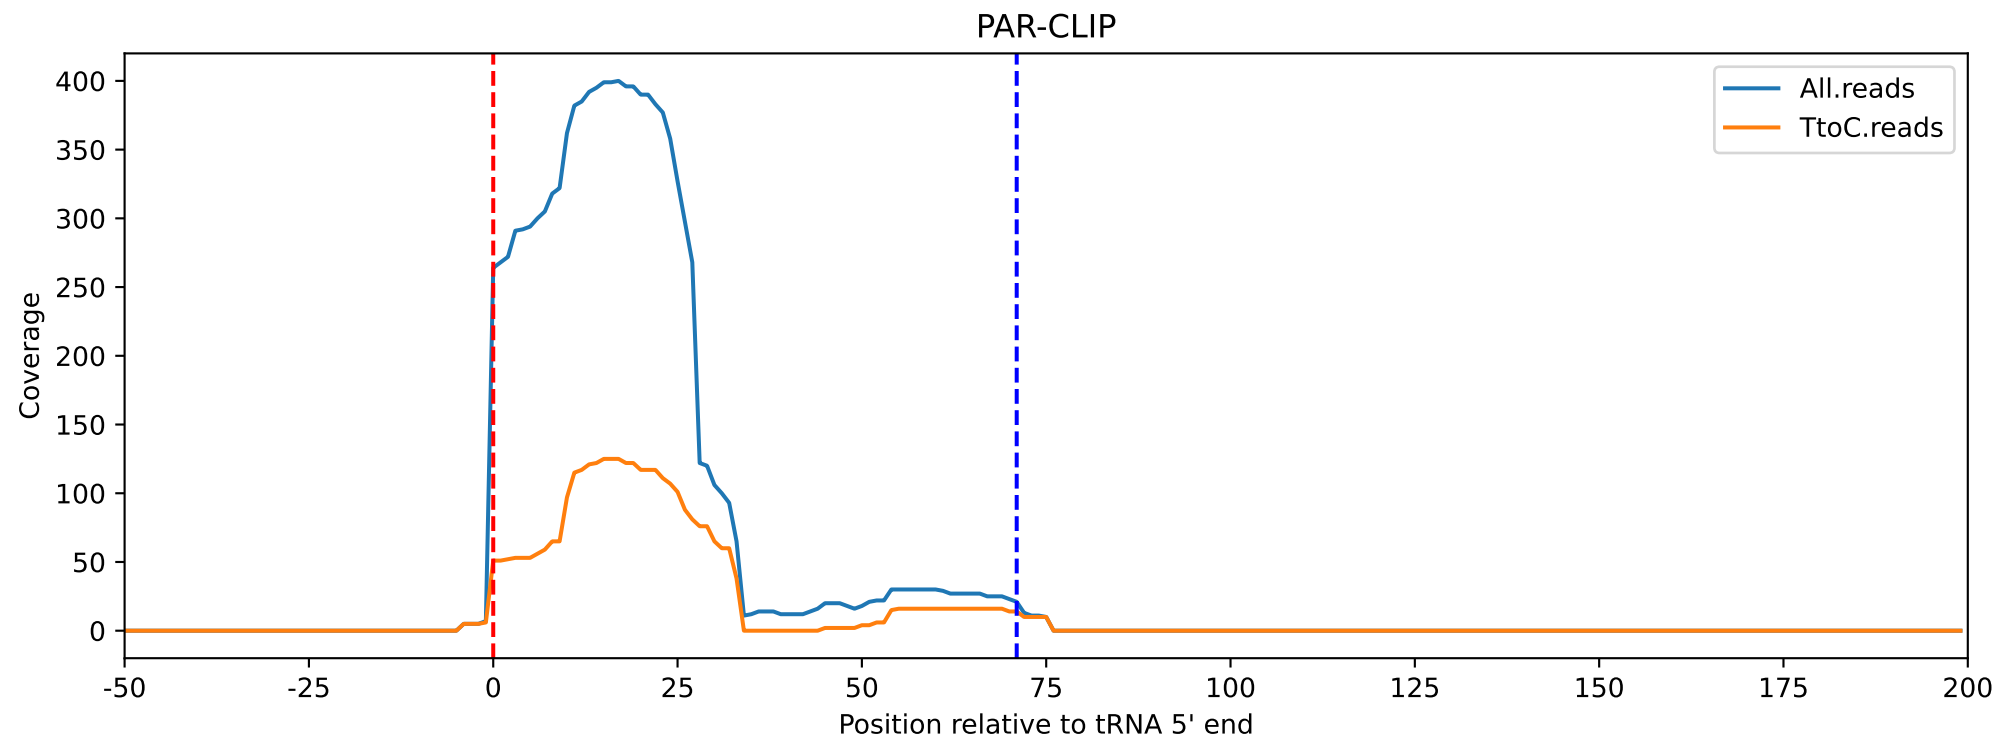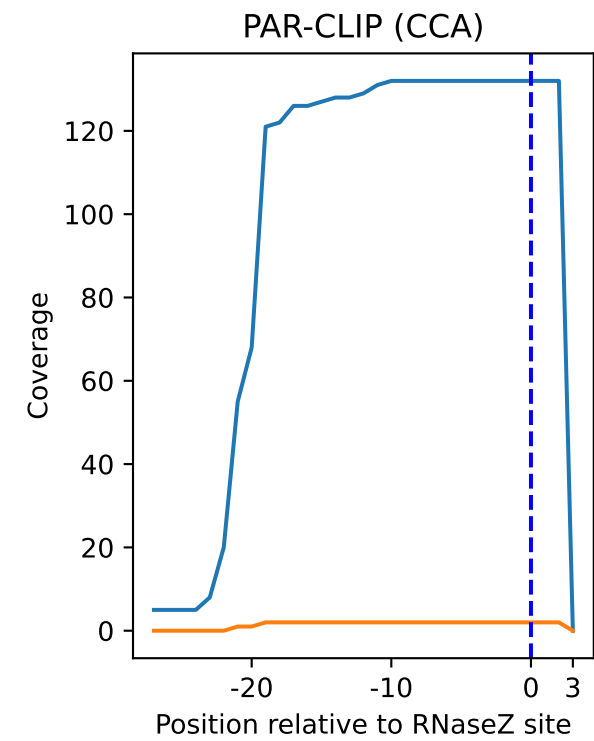



# tRNA-Trp-CCA-2-2

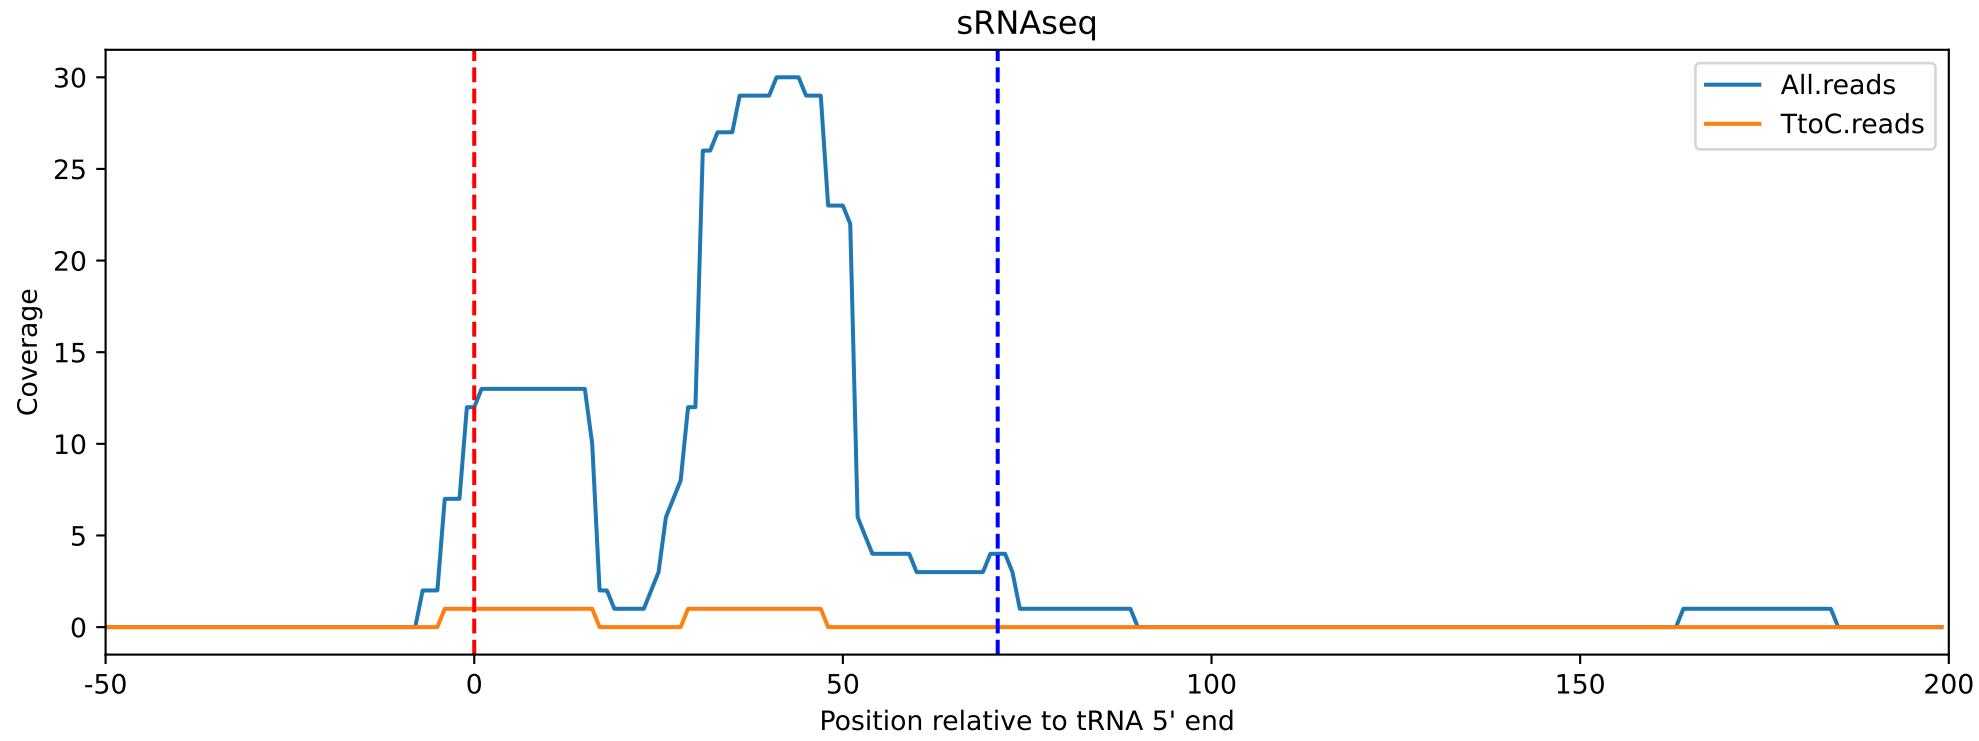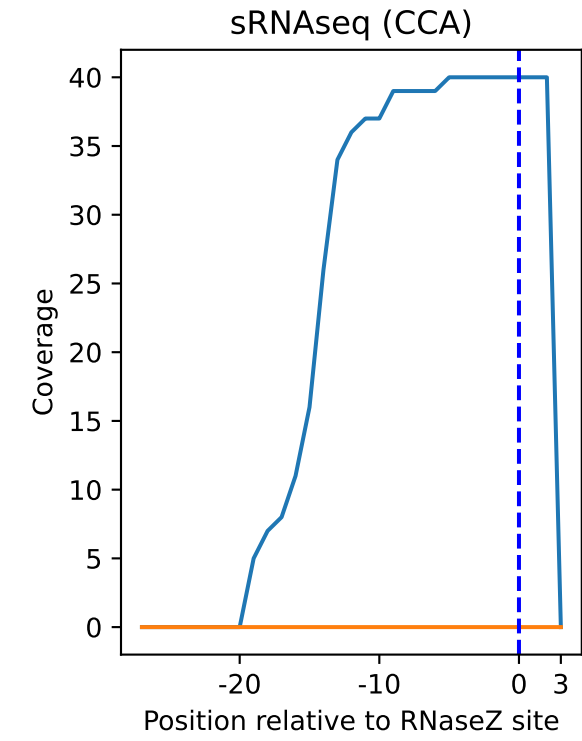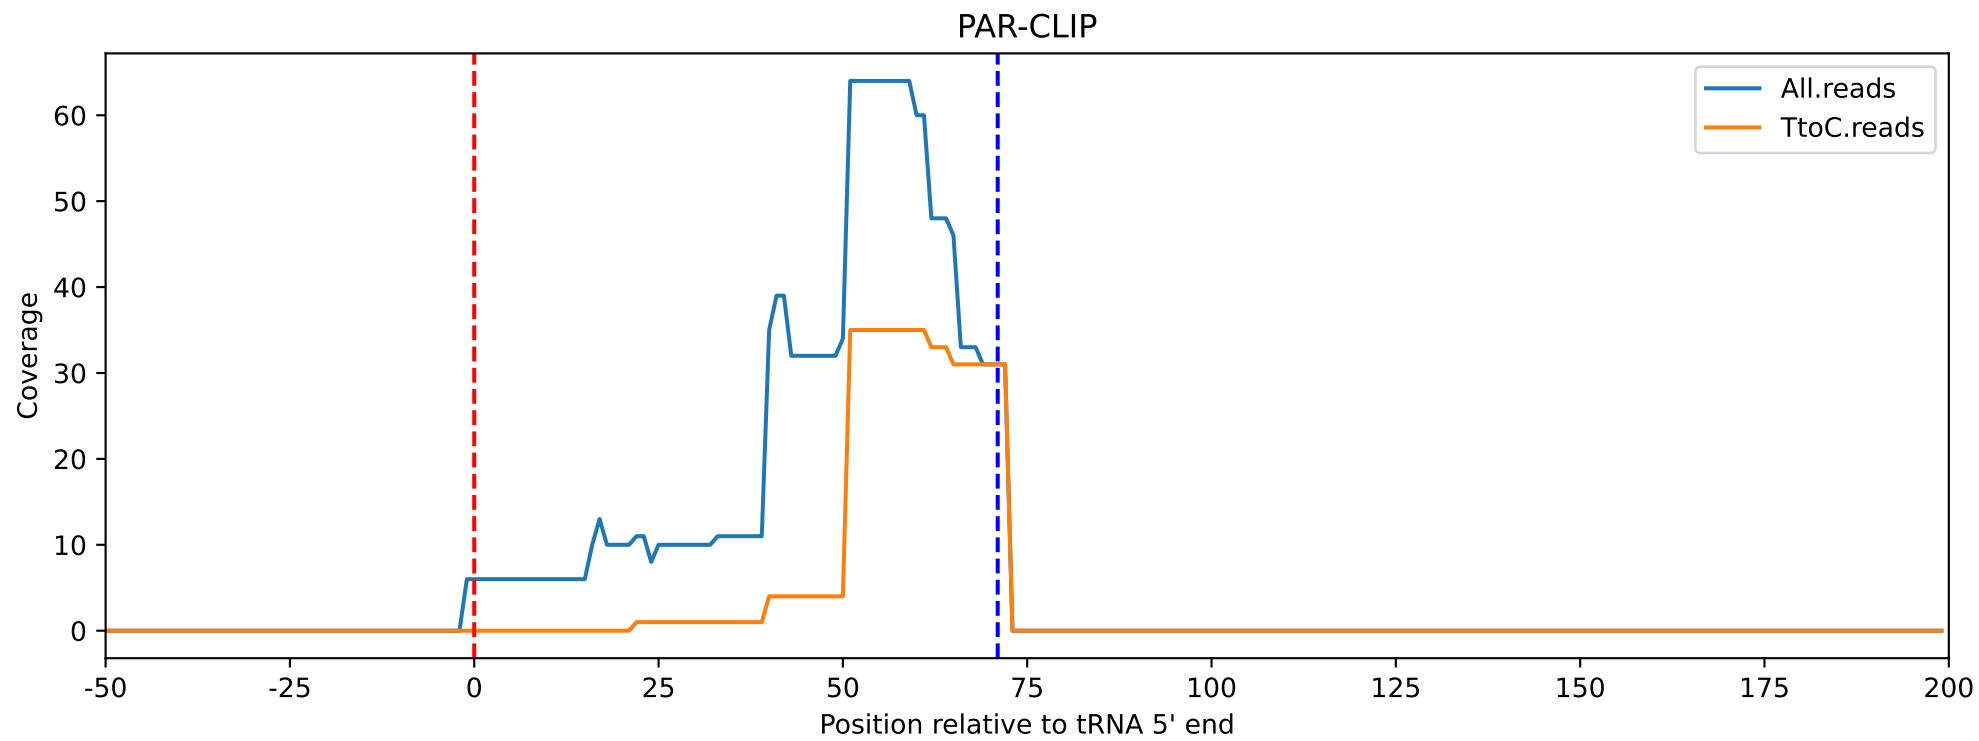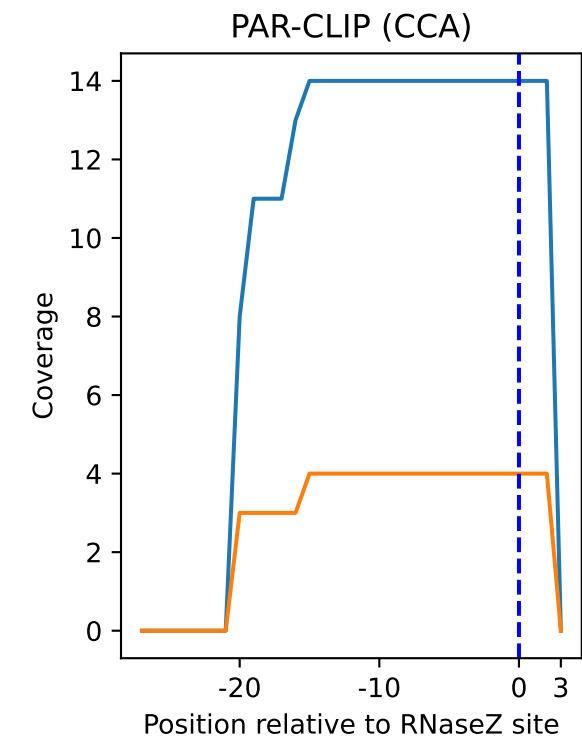

# tRNA-Ser-TGA-1-1

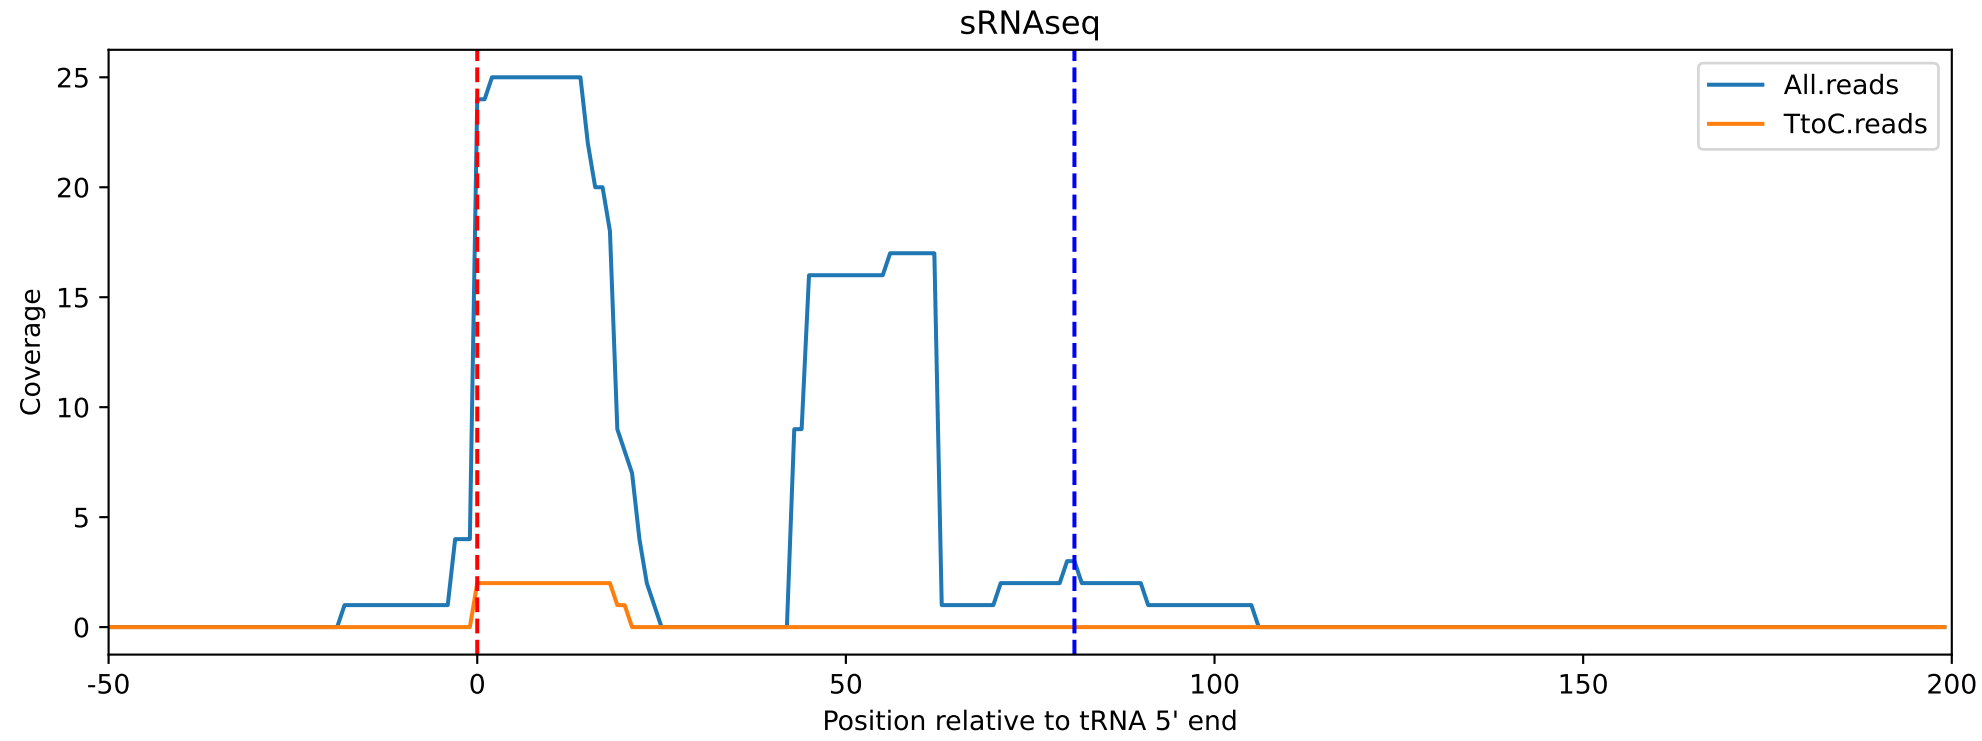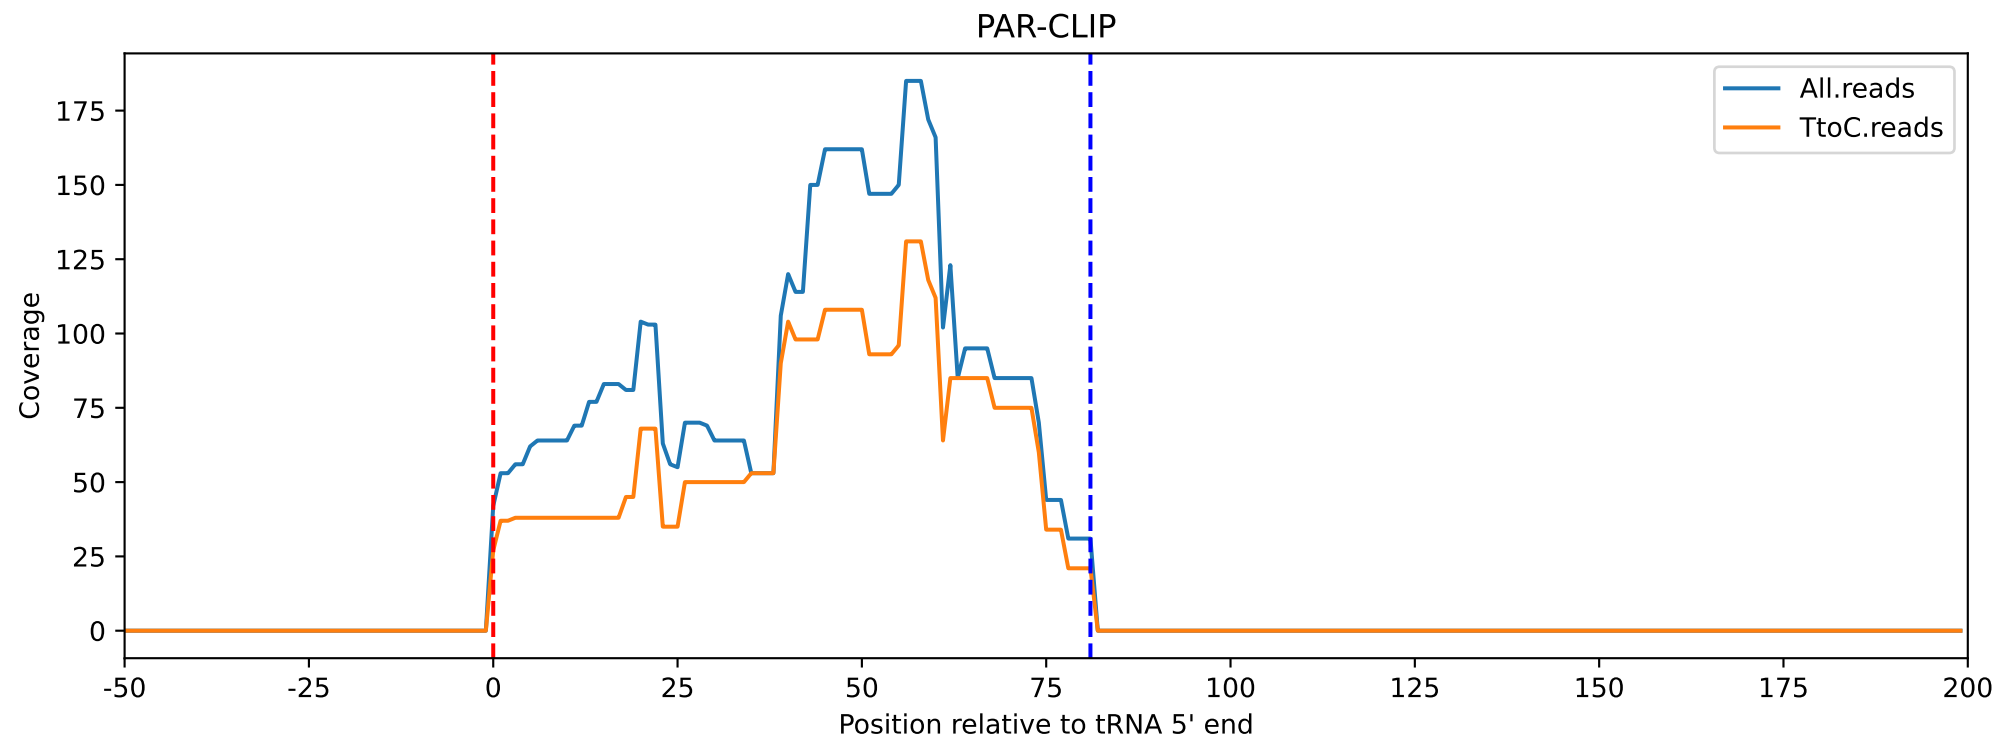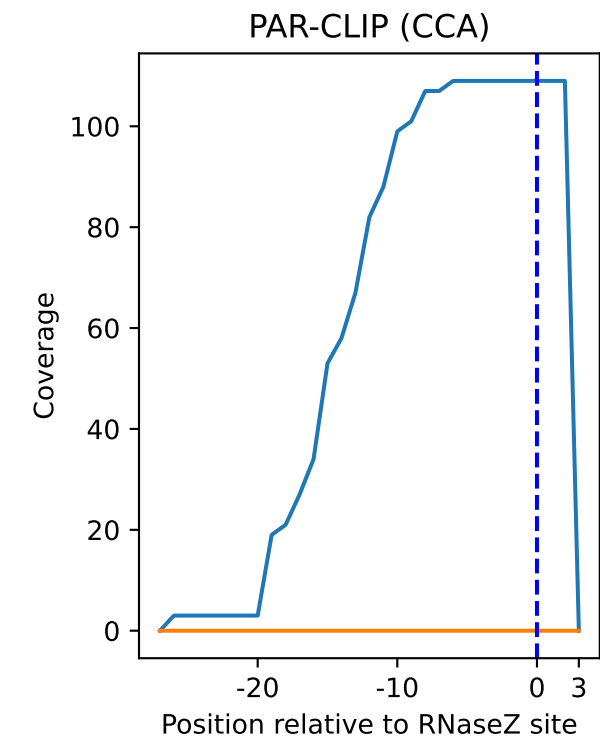

# tRNA-Ala-AGC-2-8

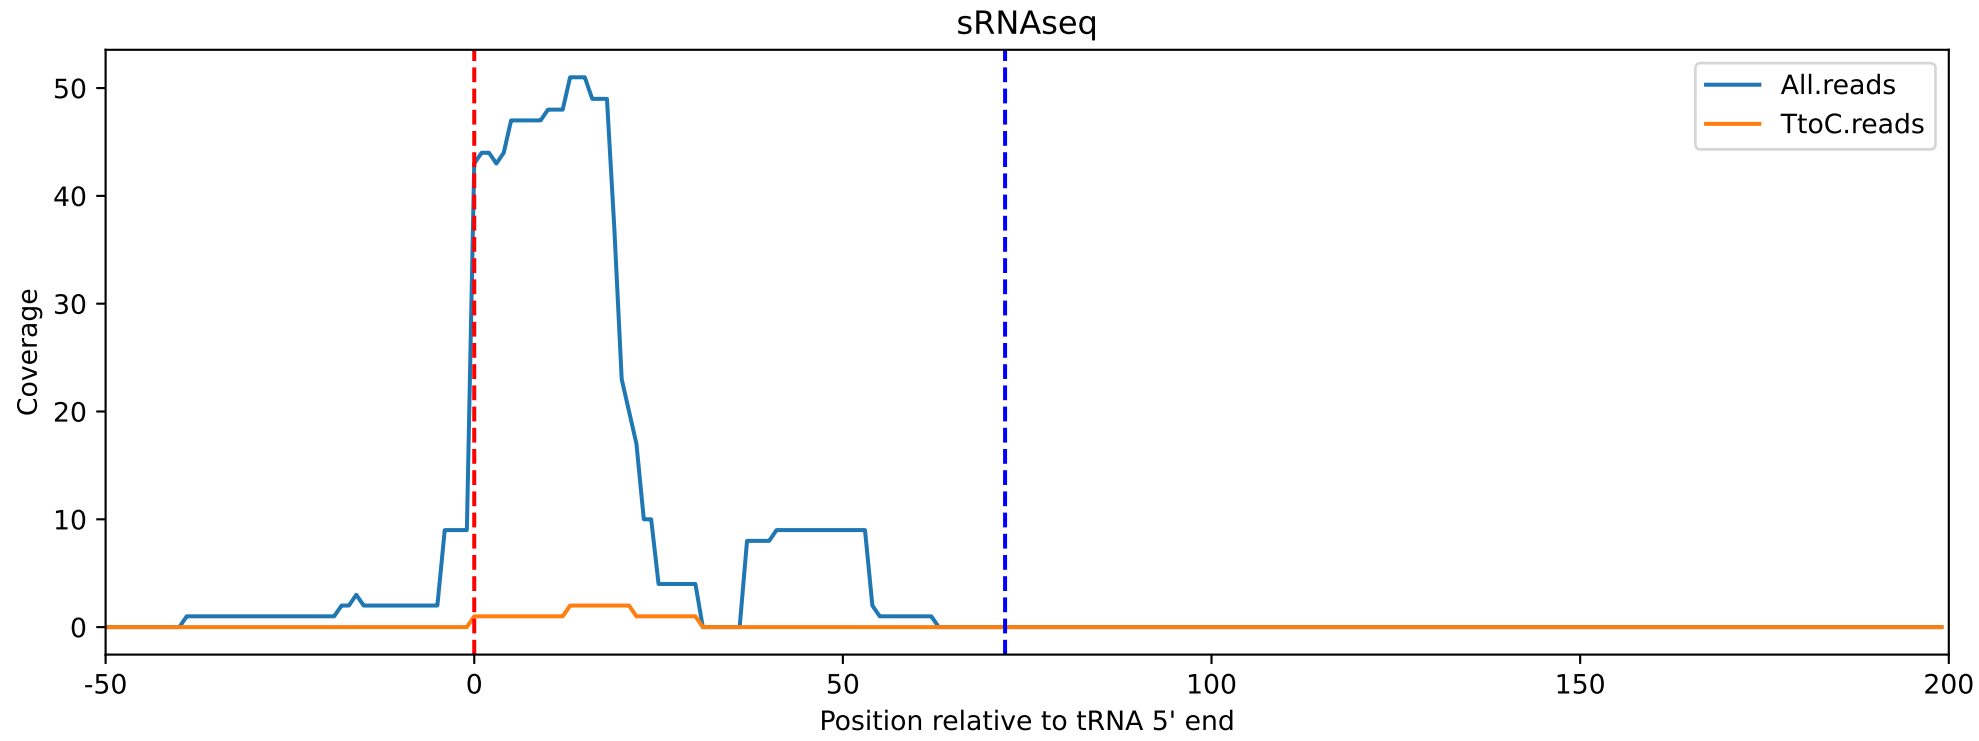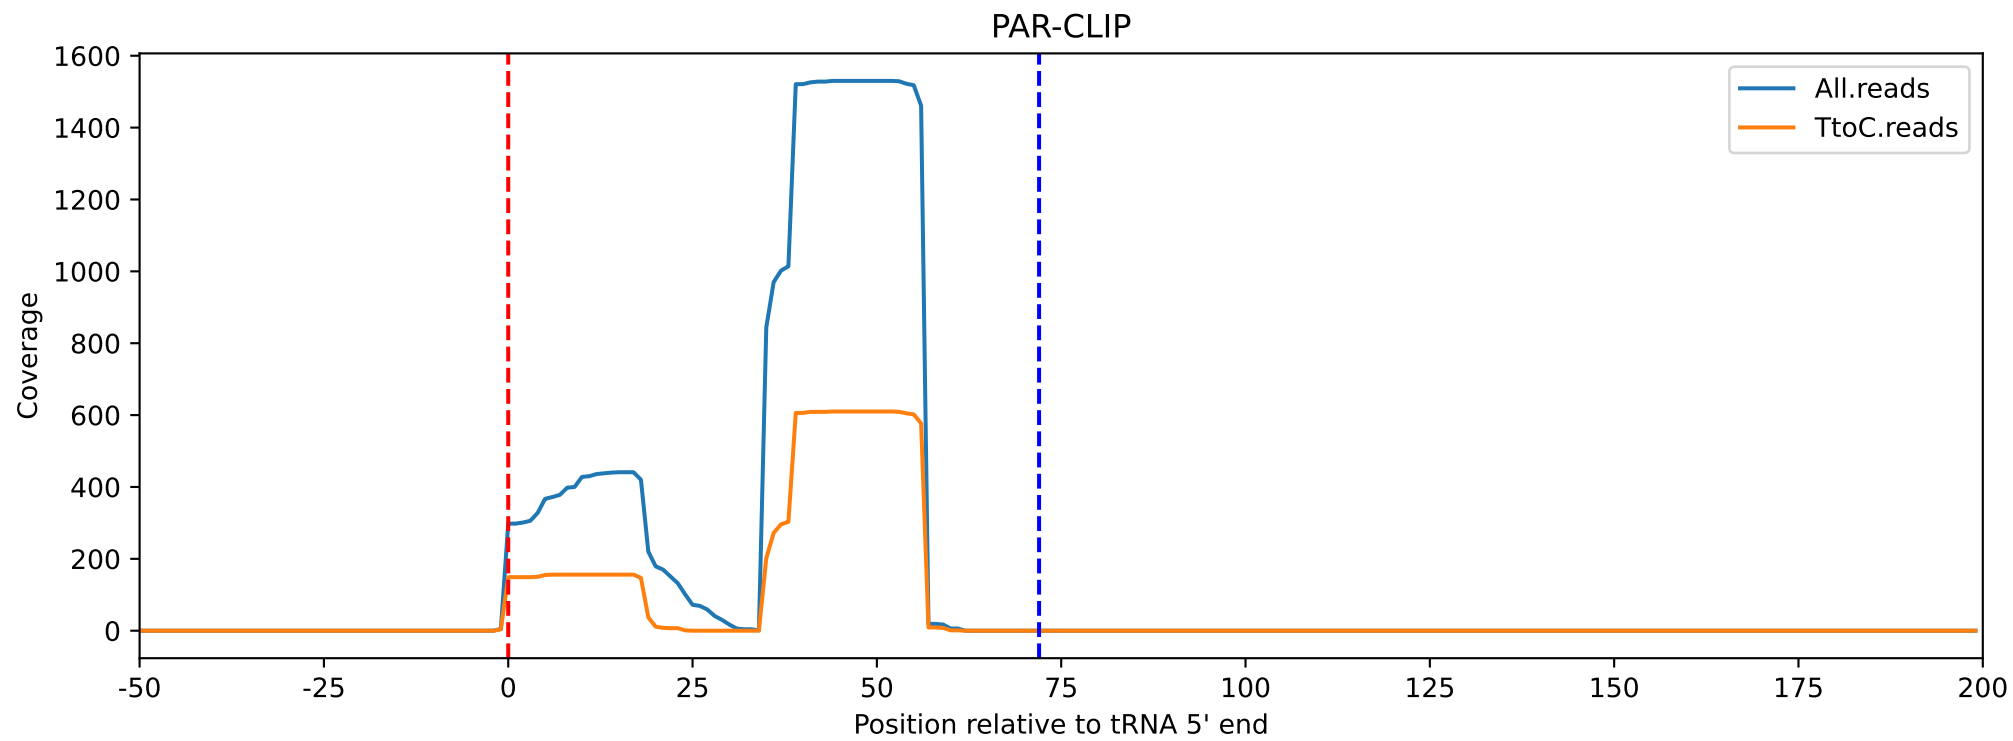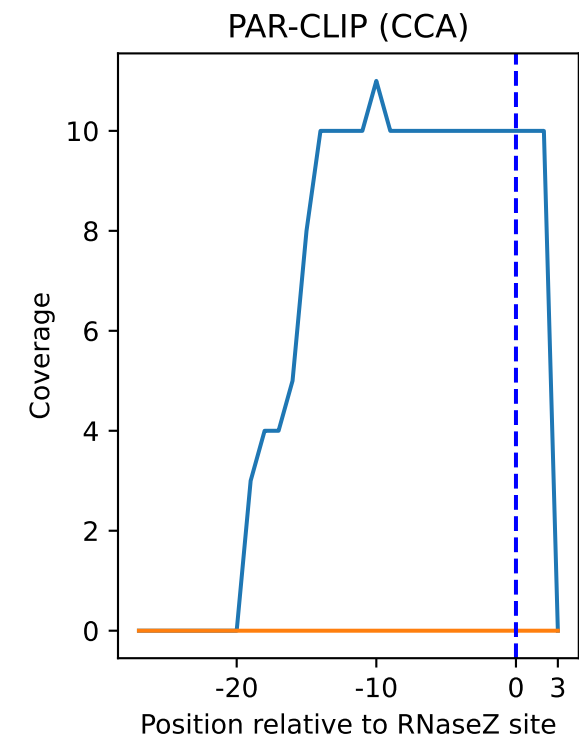

# tRNA-Ser-GCT-2-4

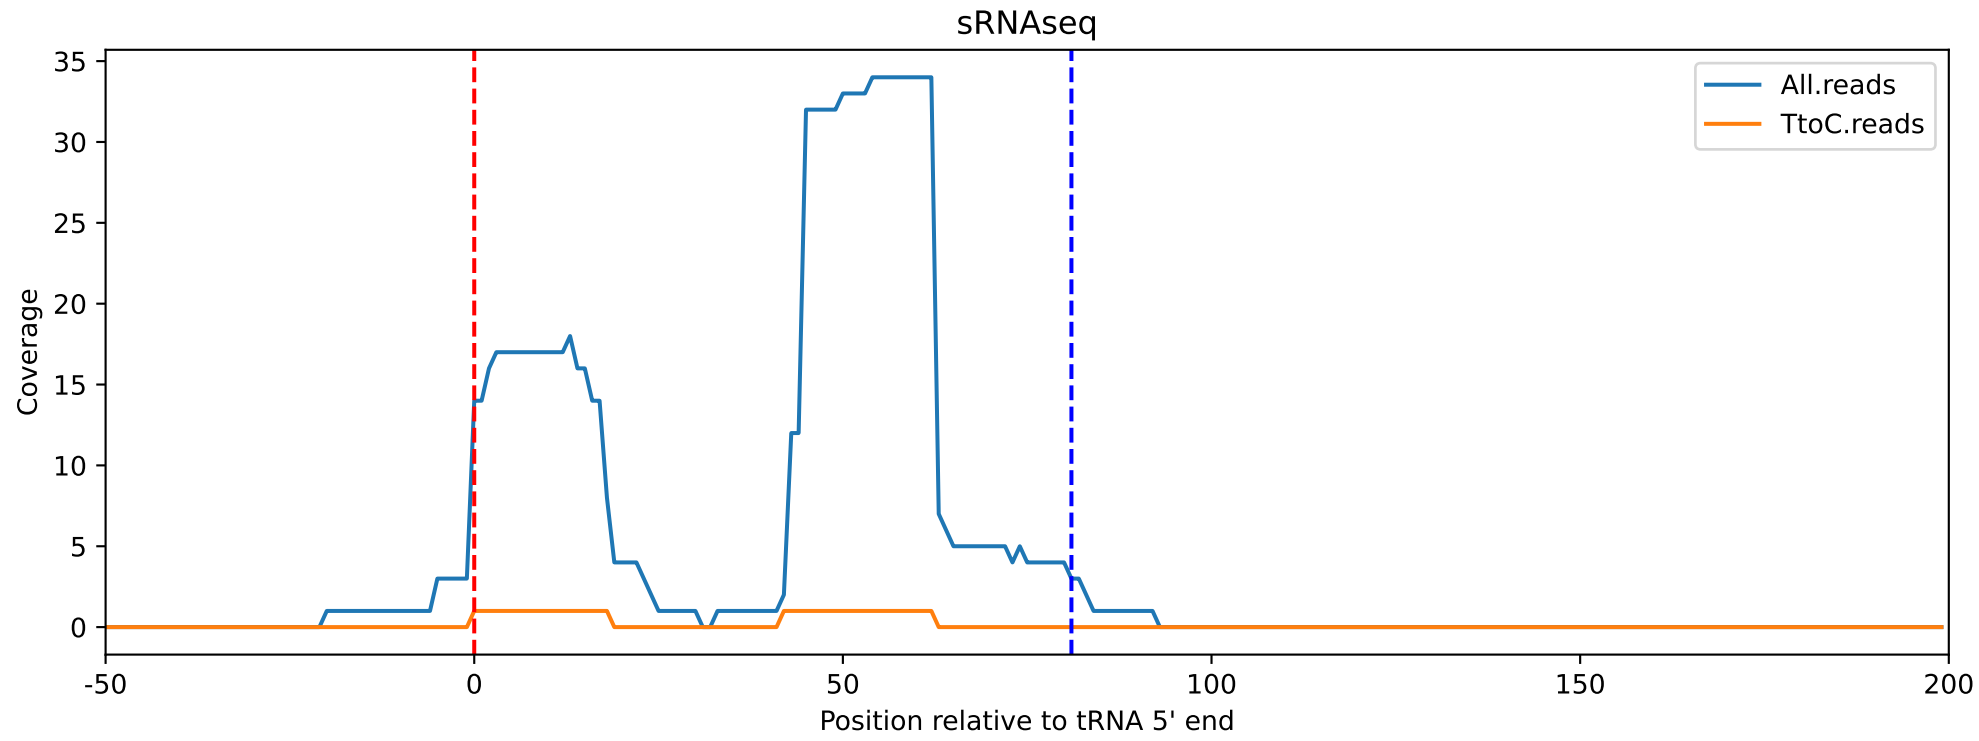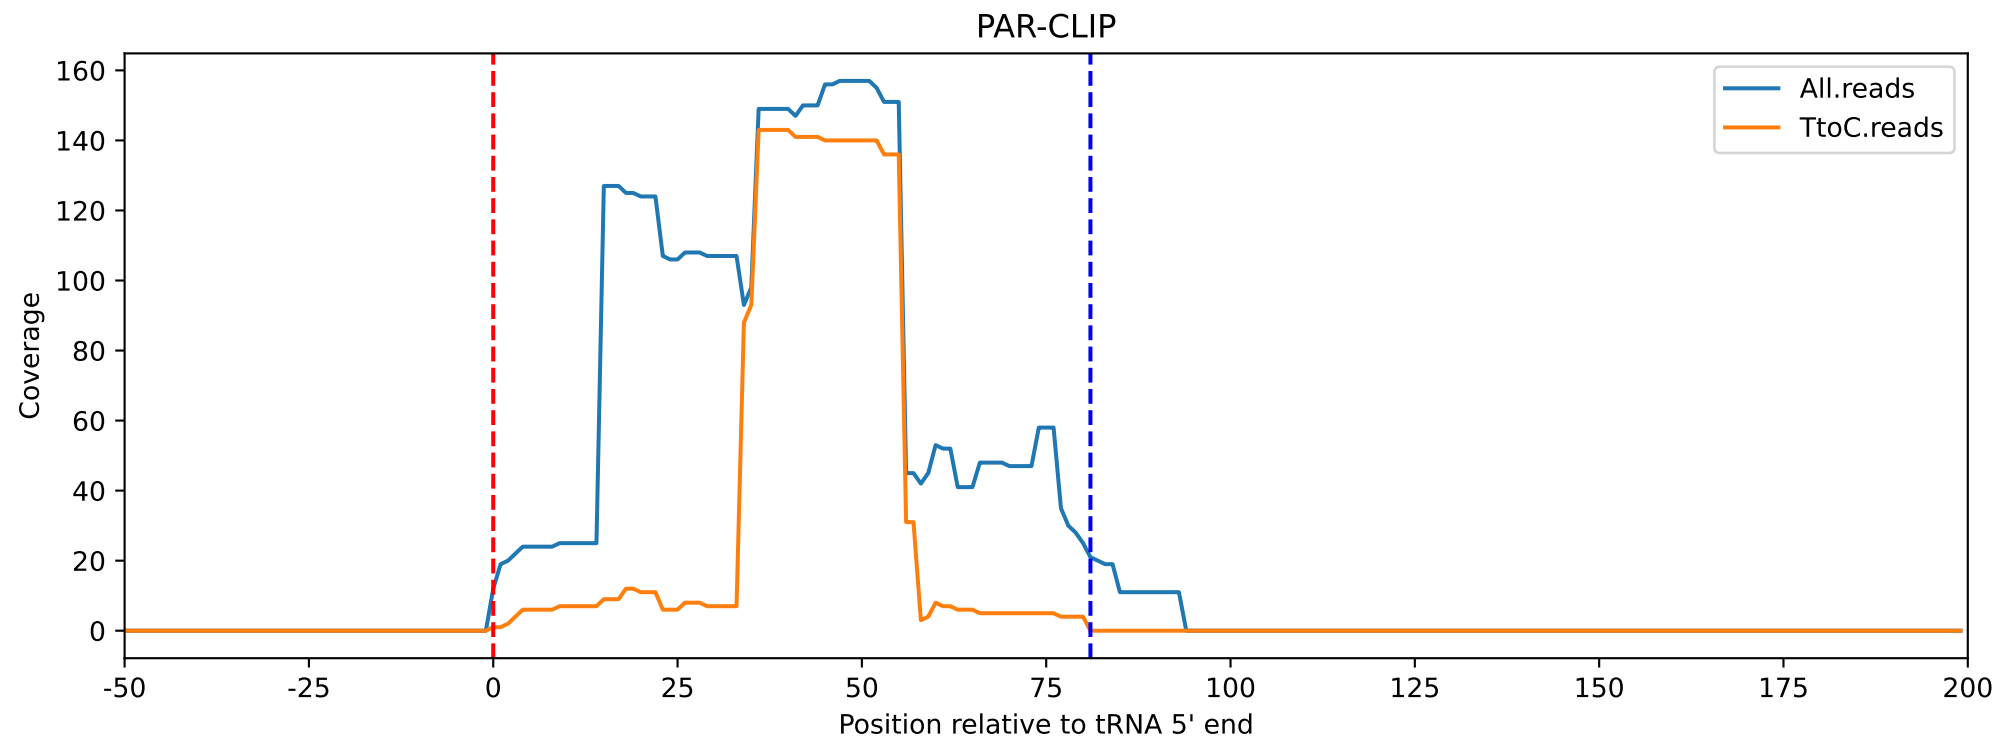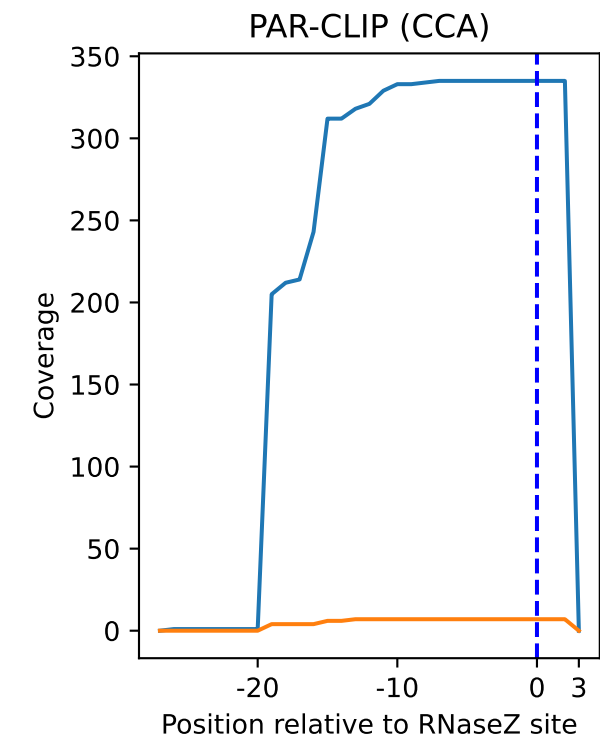

# tRNA-Pro-CGG-1-1

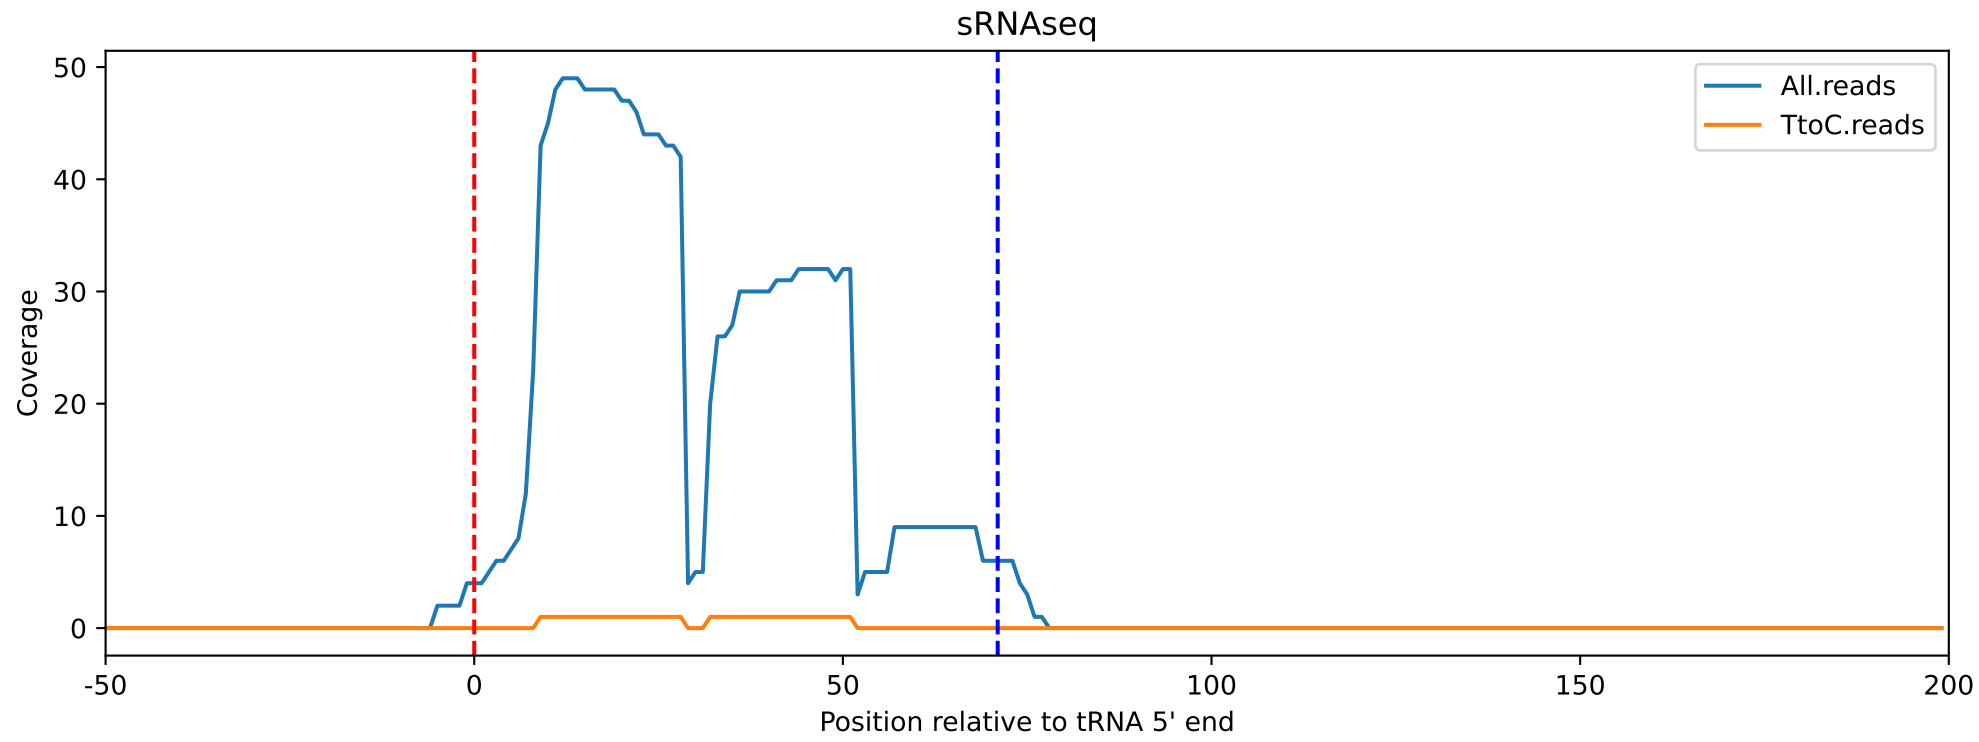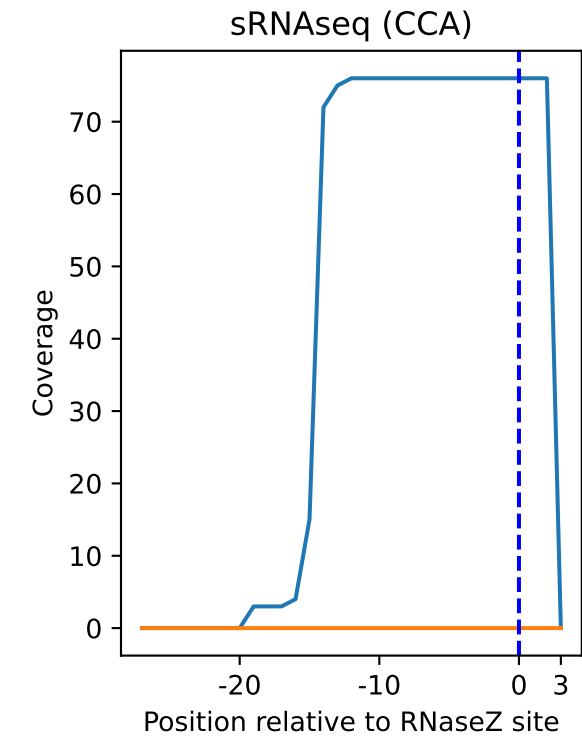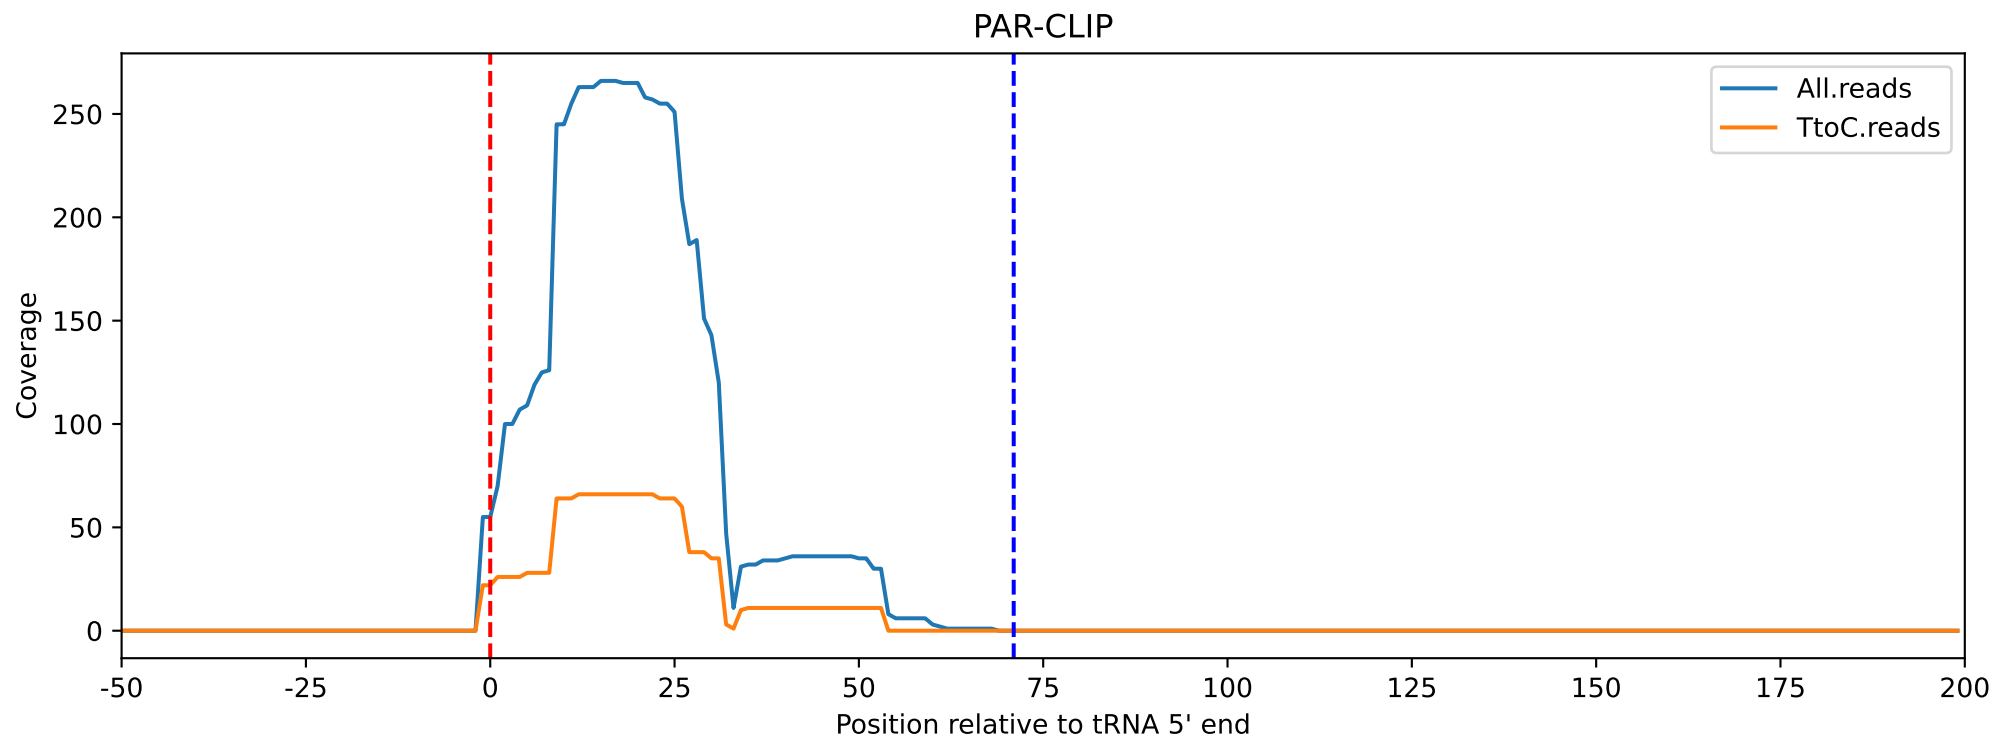

# tRNA-SeC-TCA-1-1

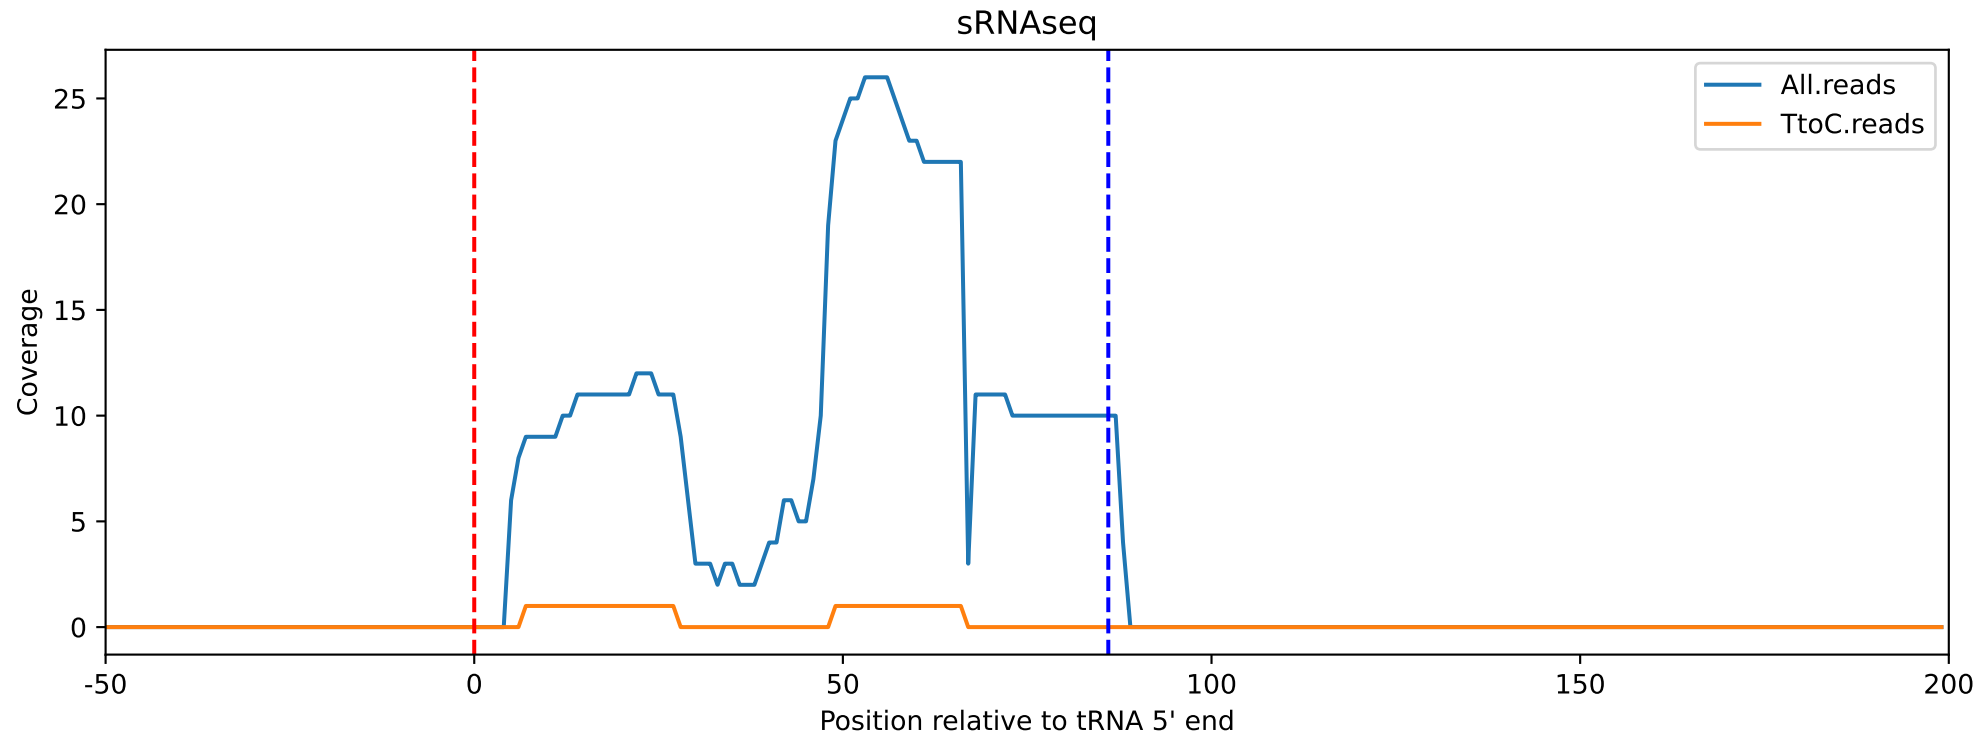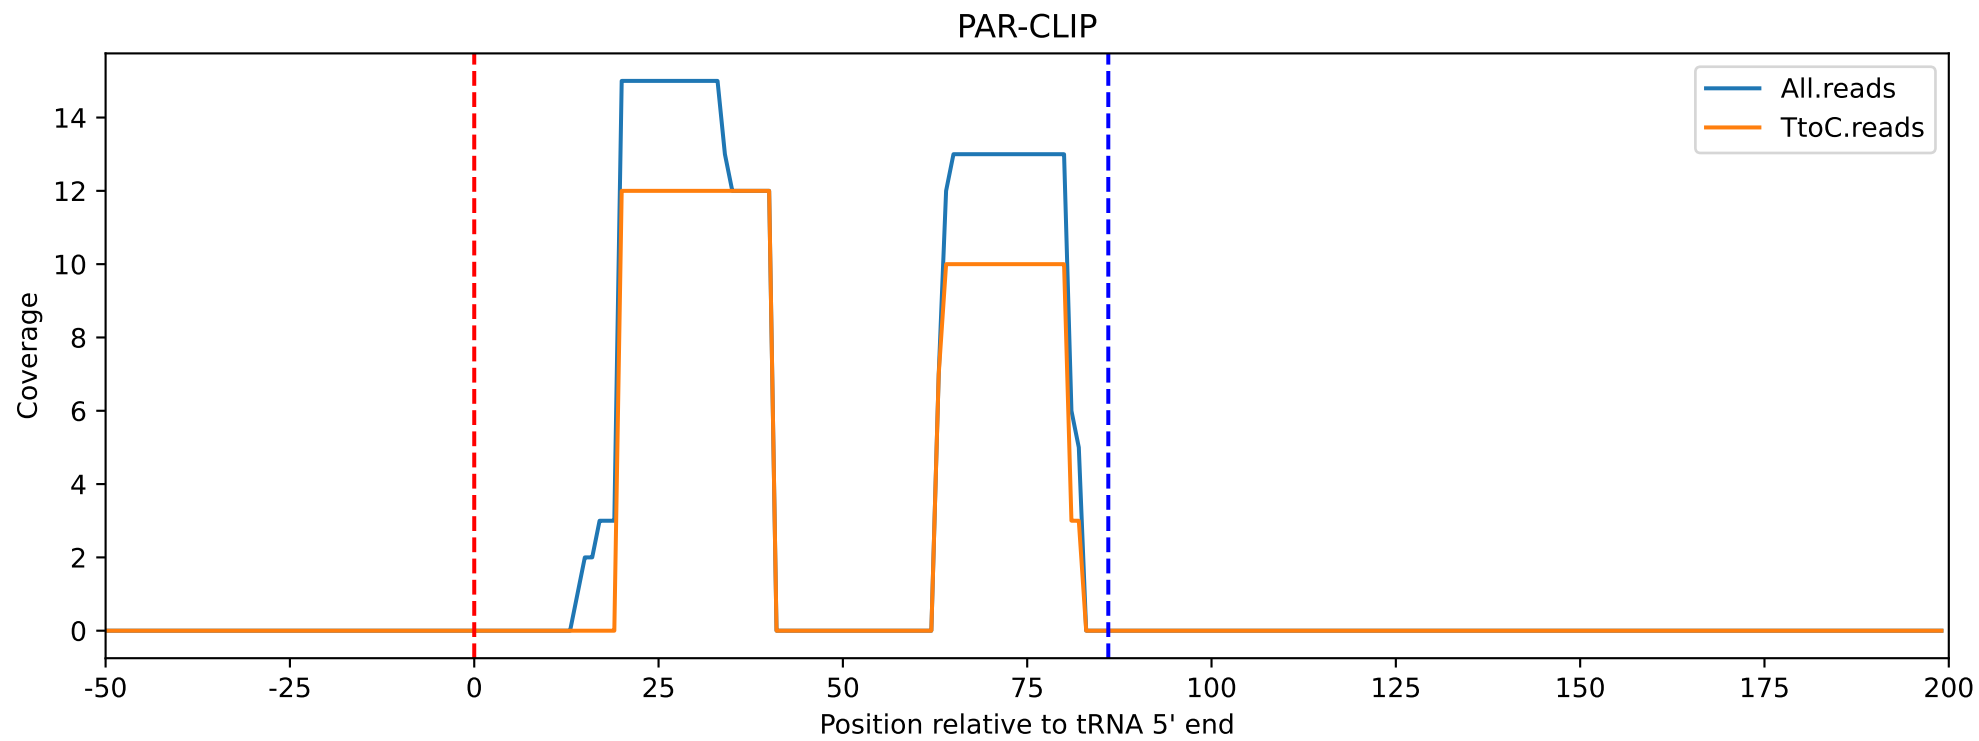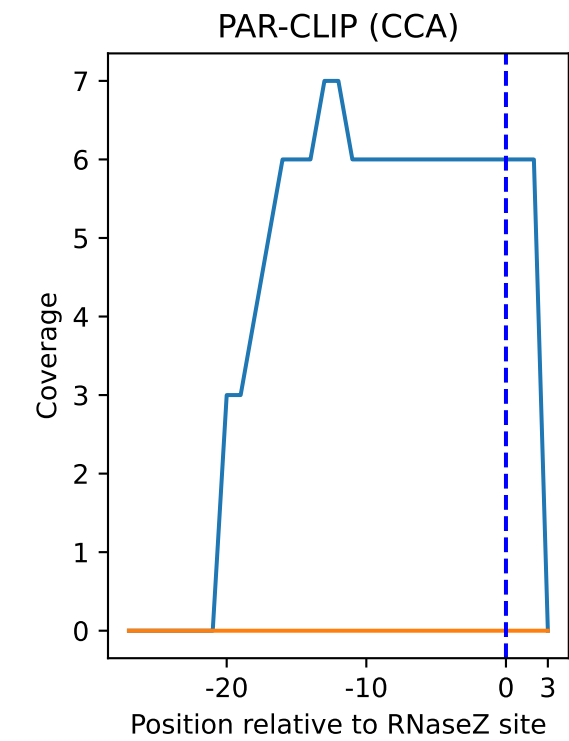

# tRNA-Ala-CGC-1-3

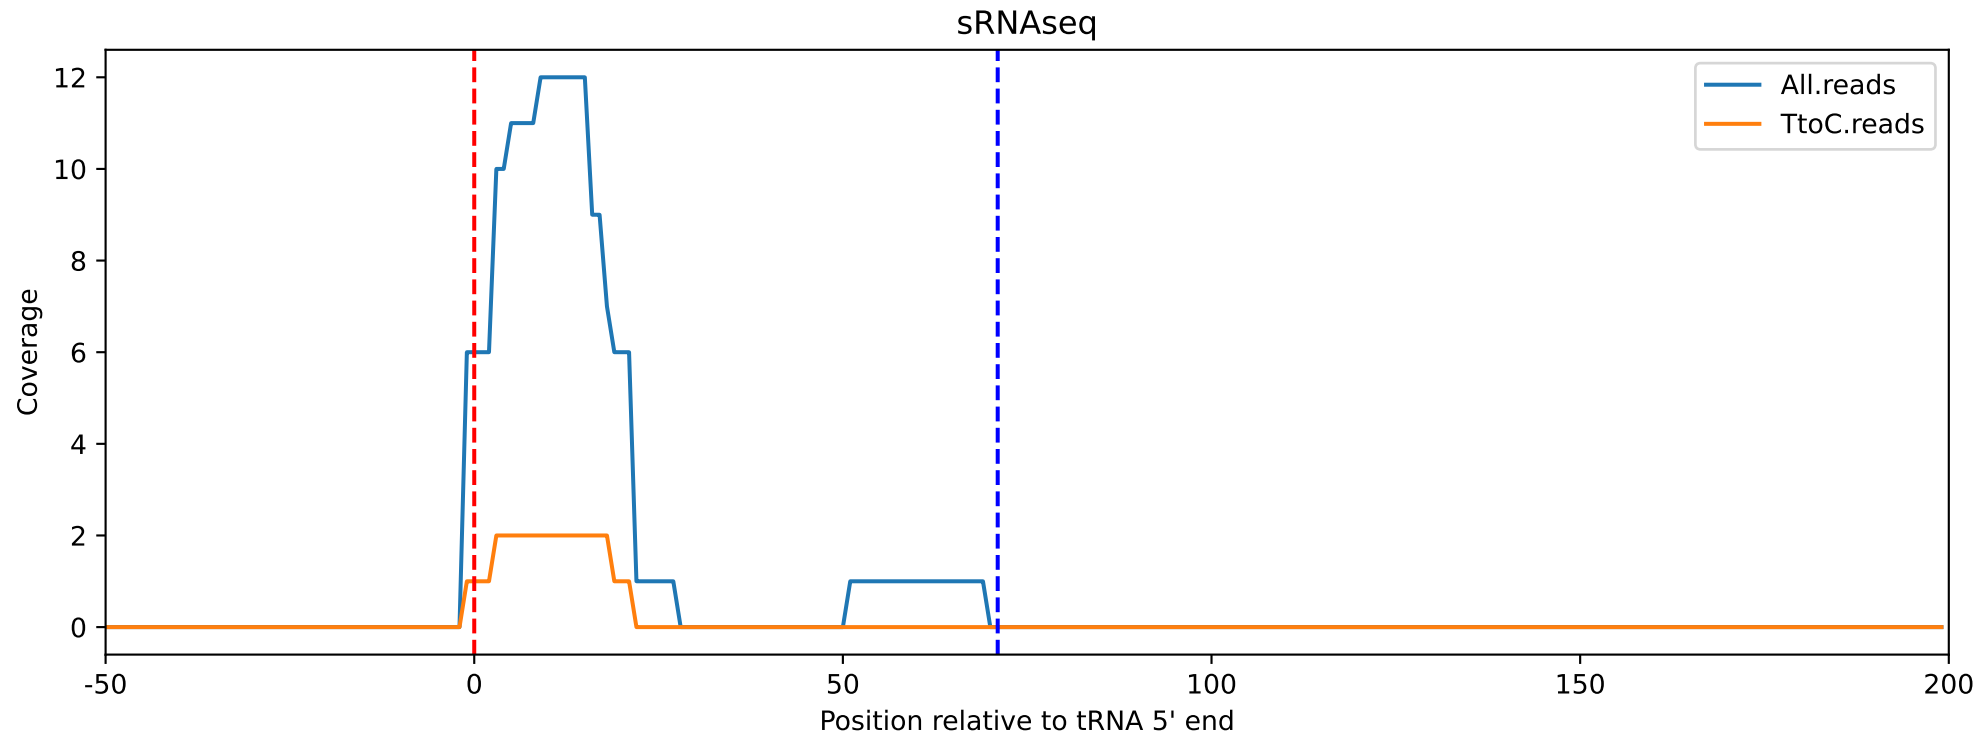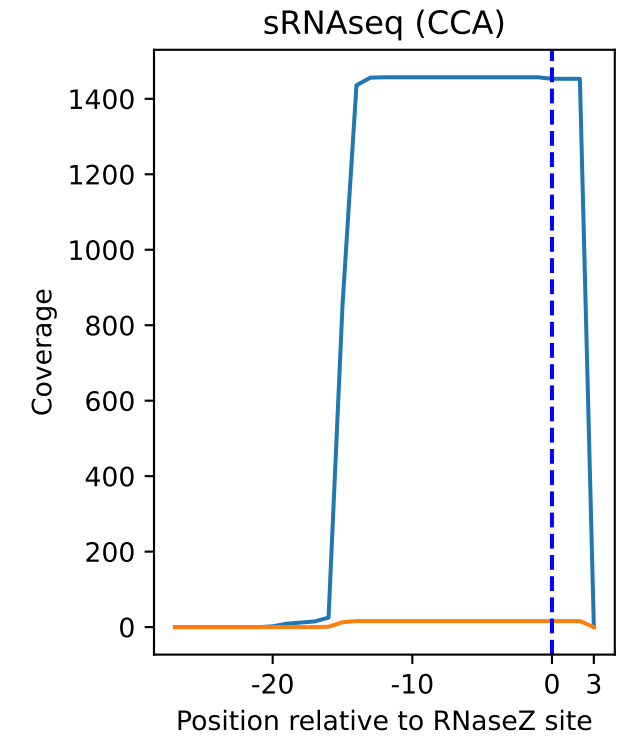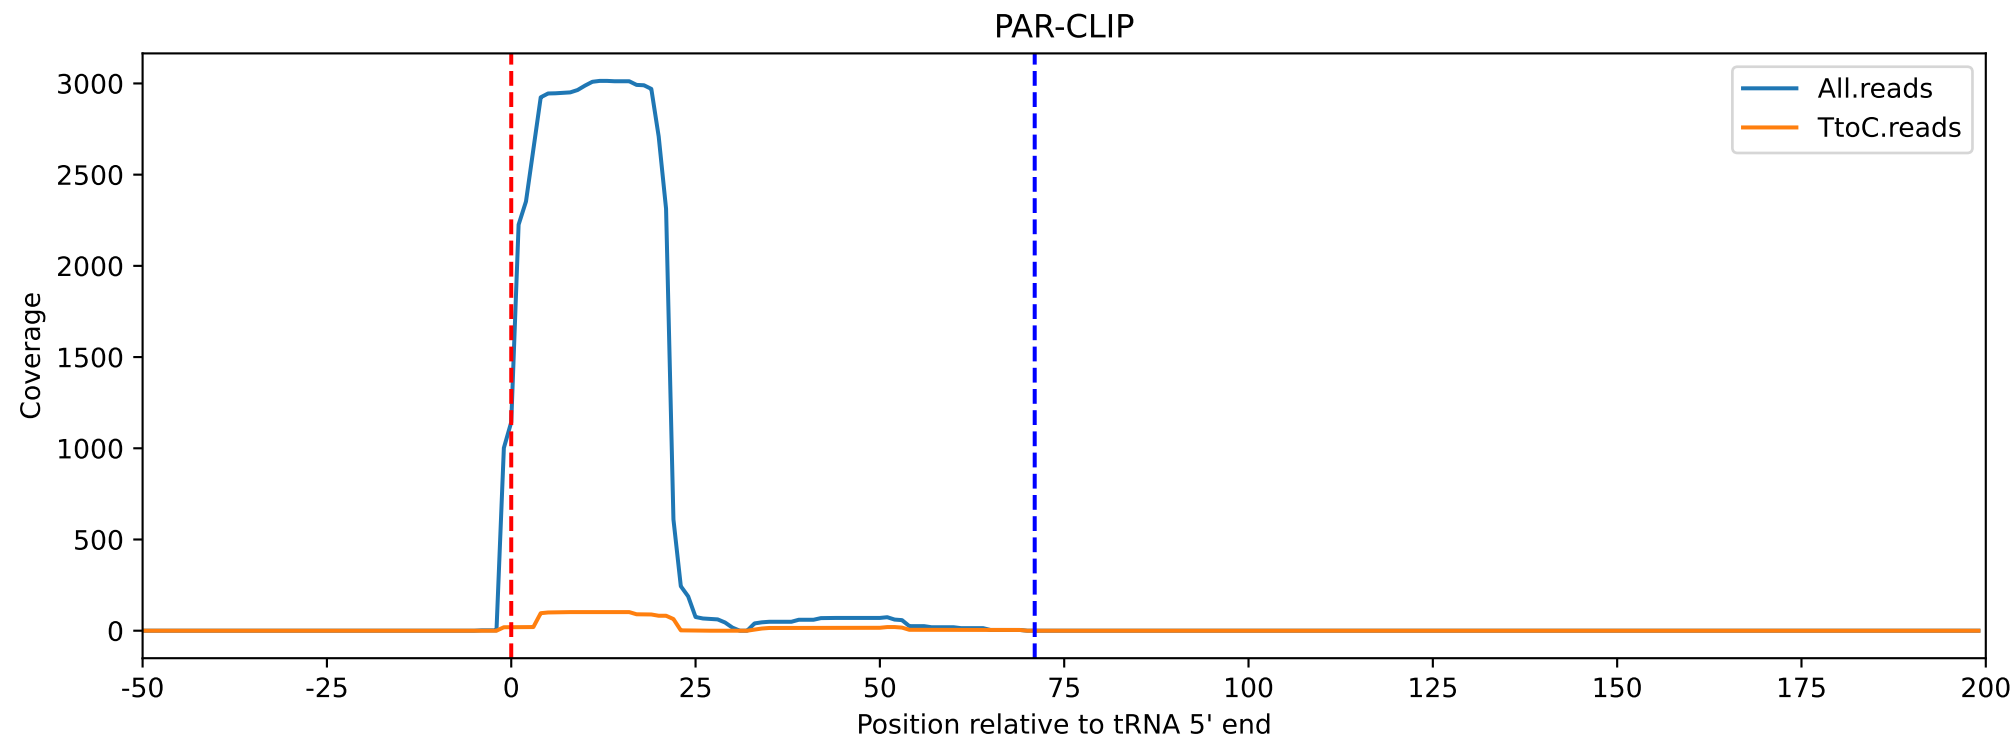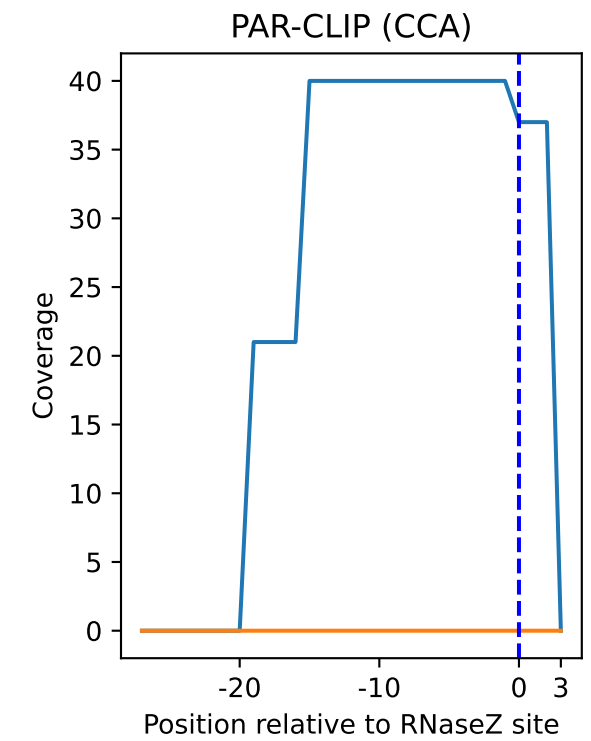

# tRNA-Pro-CGG-2-2

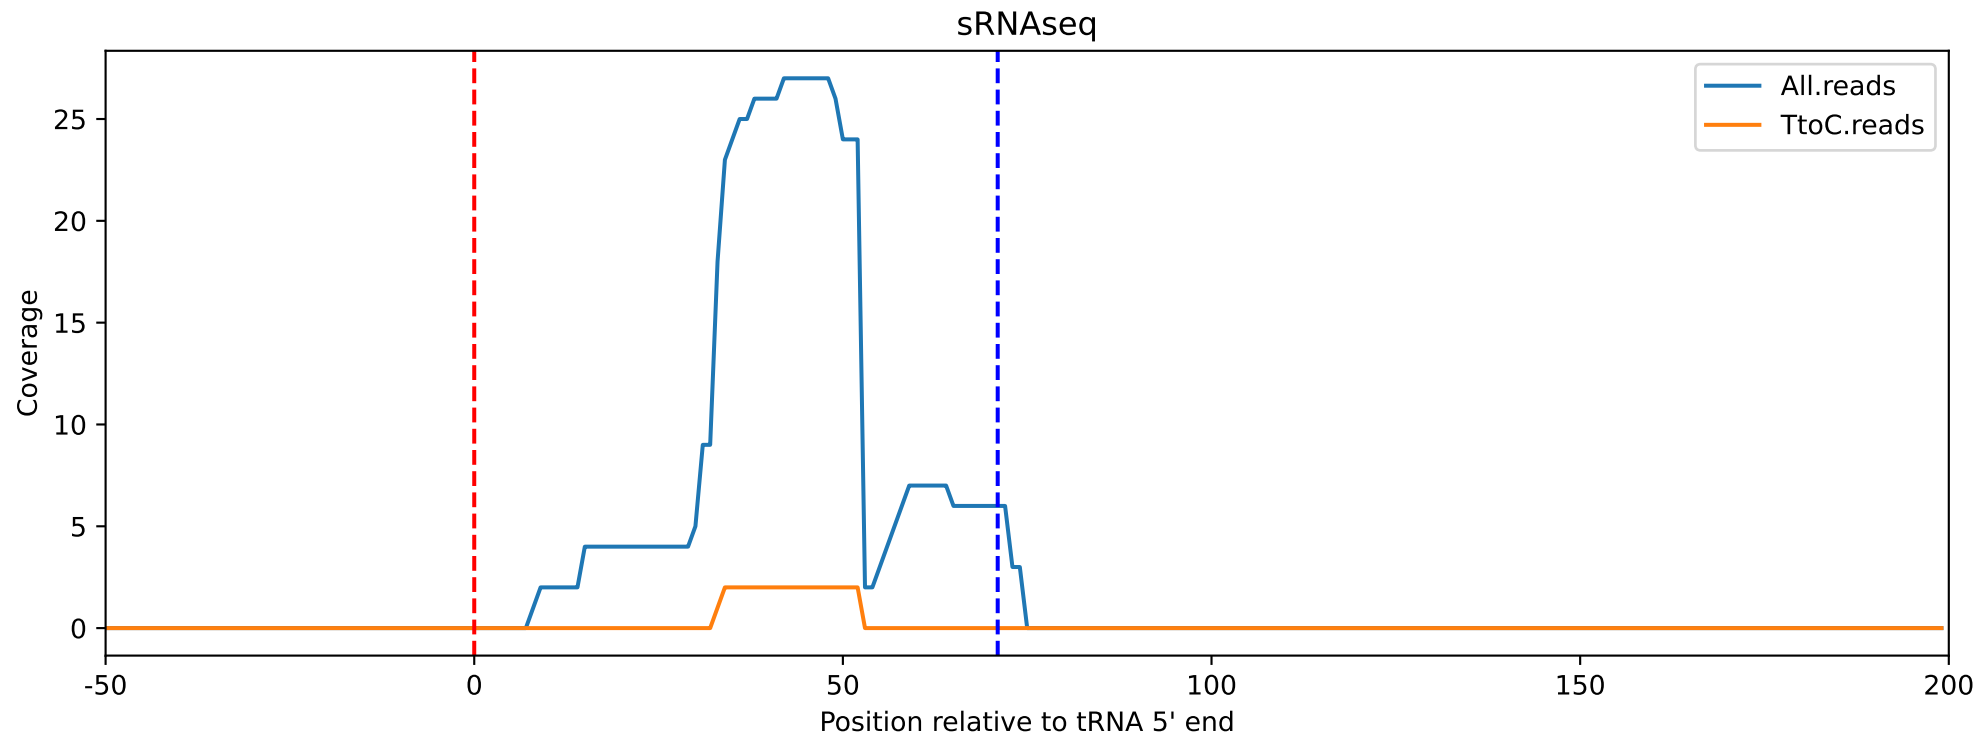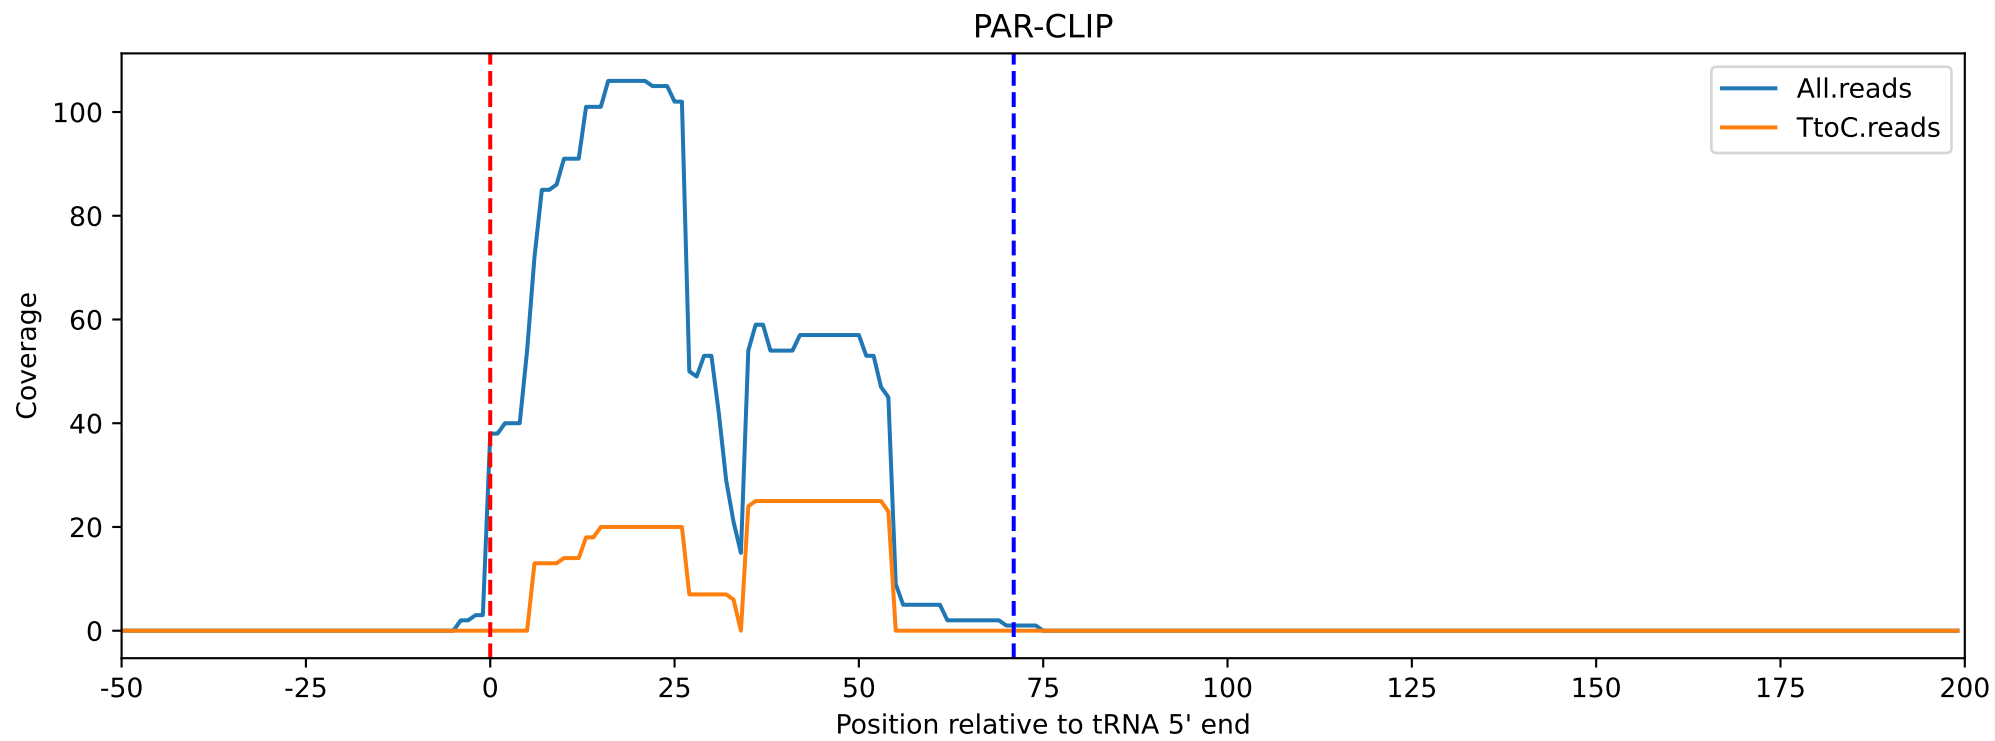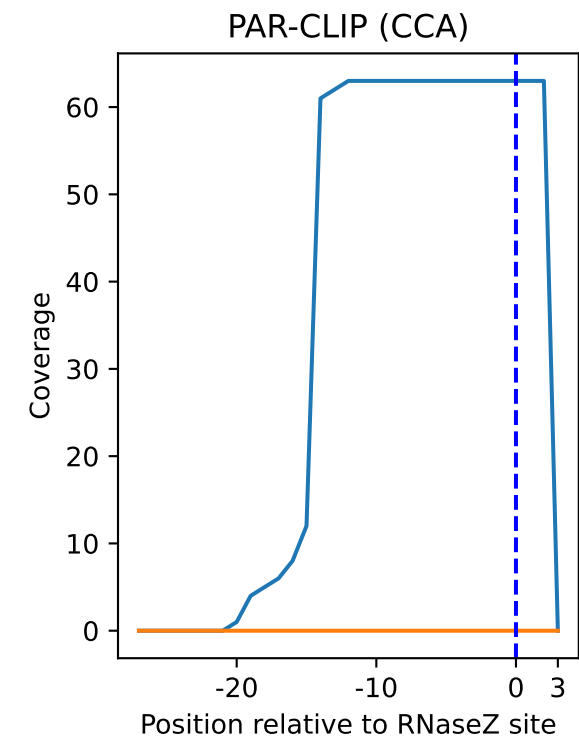



# tRNA-Lys-TTT-2-2

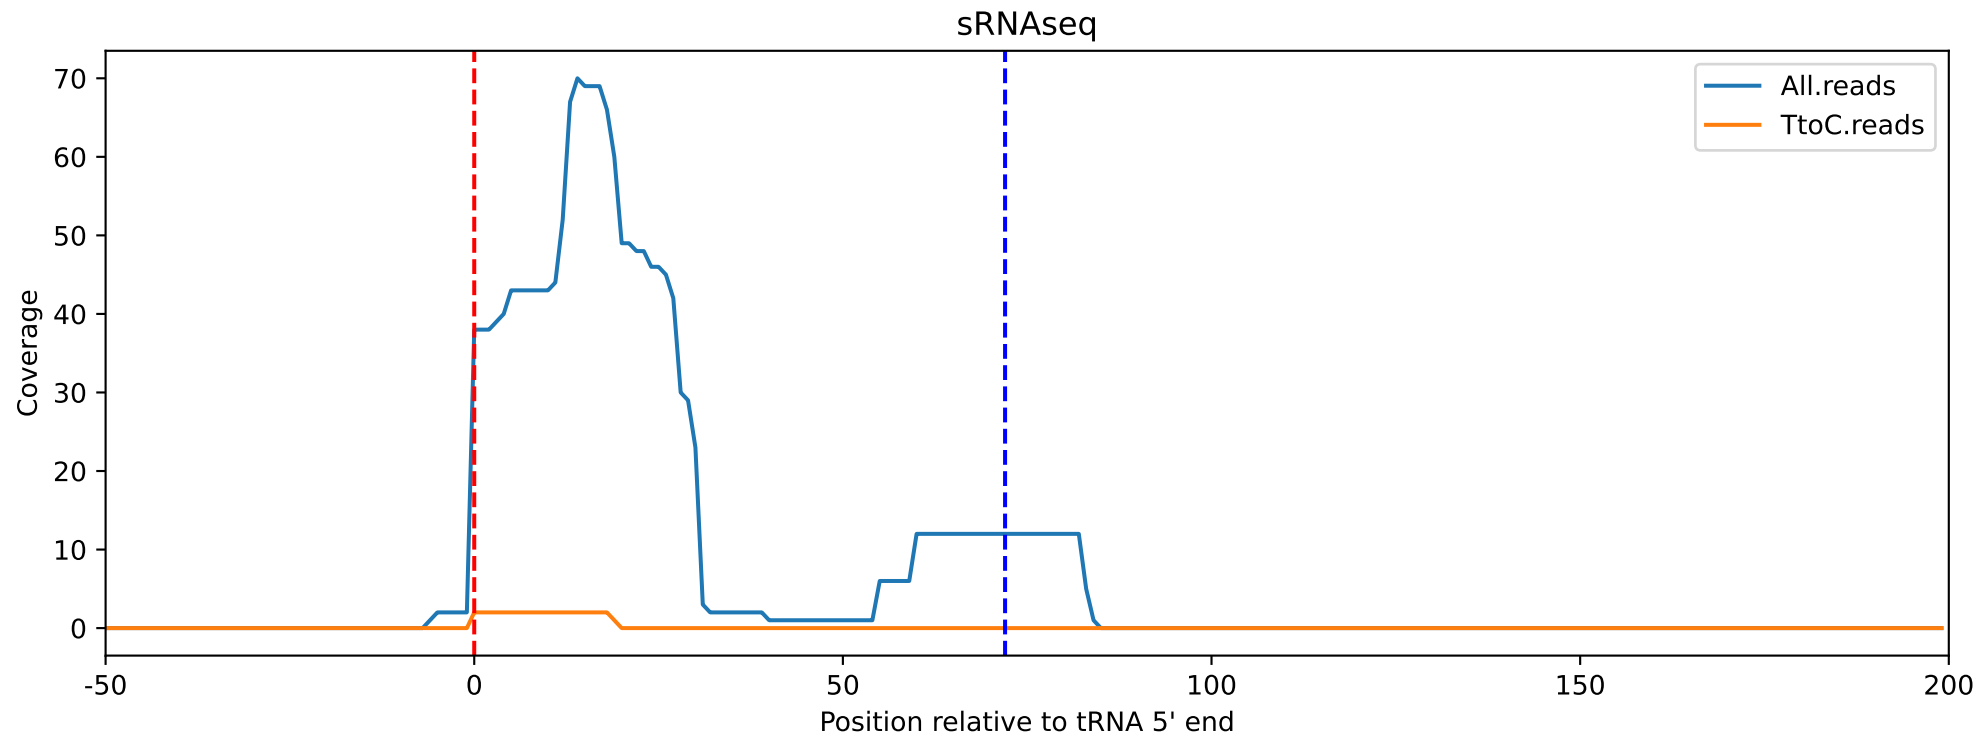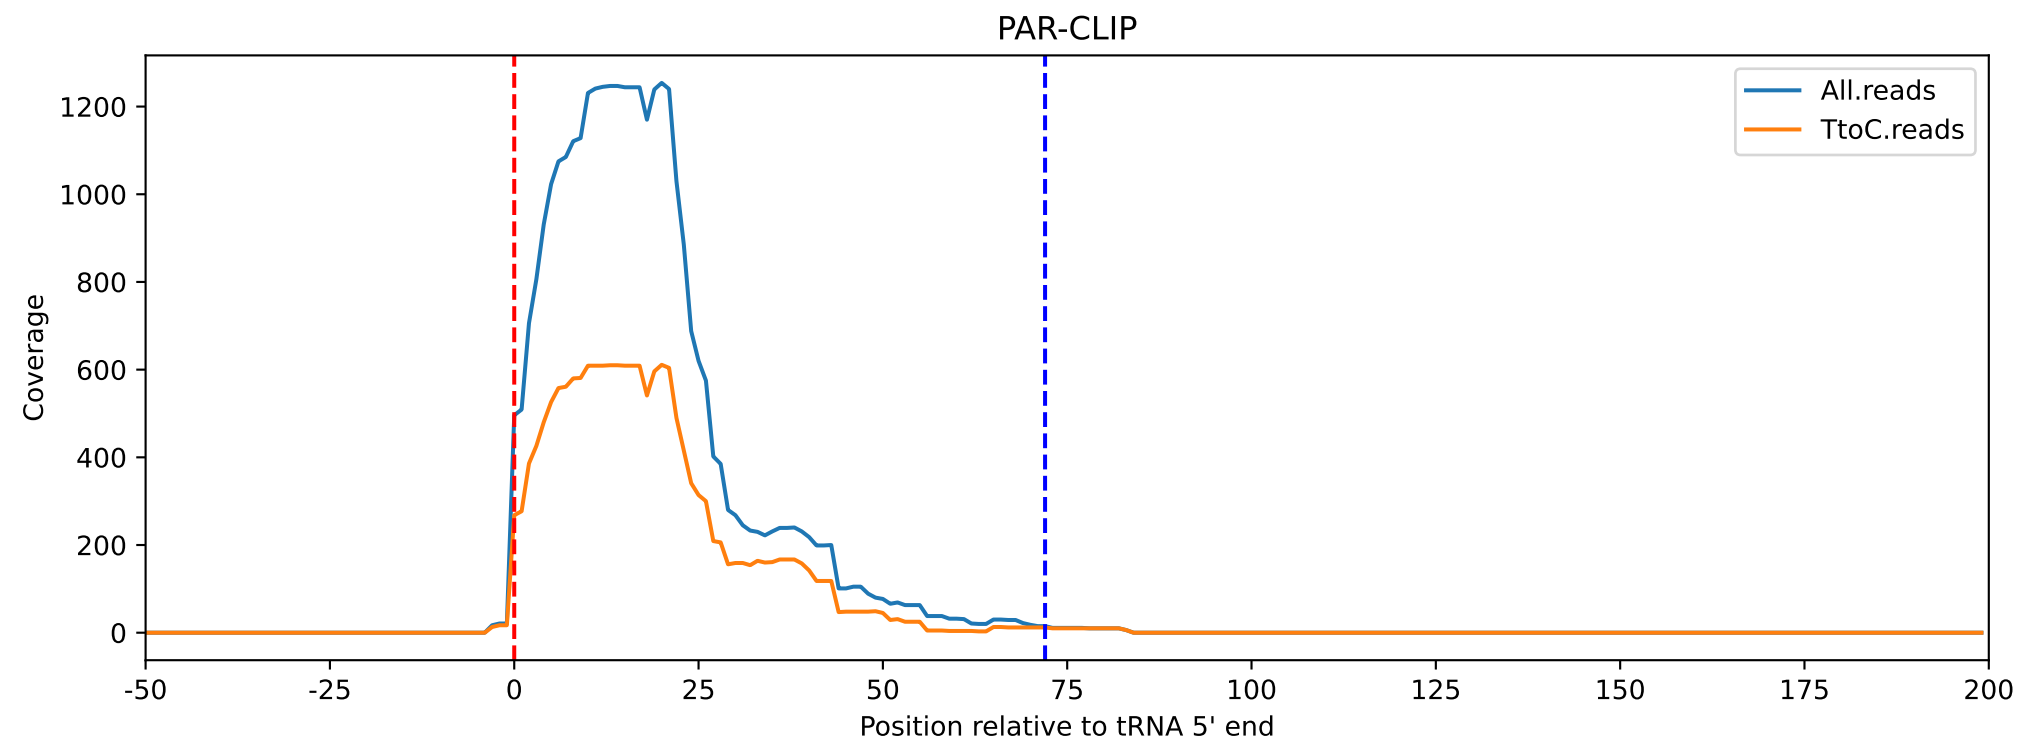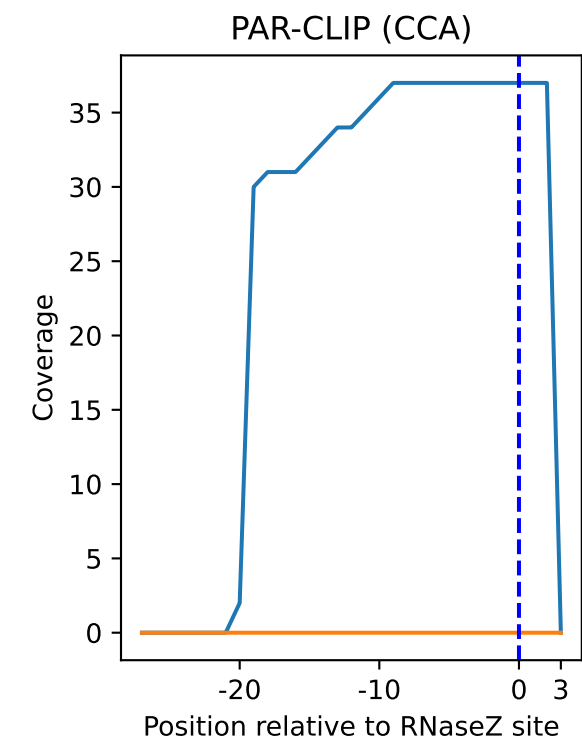

# tRNA-His-GTG-1-5

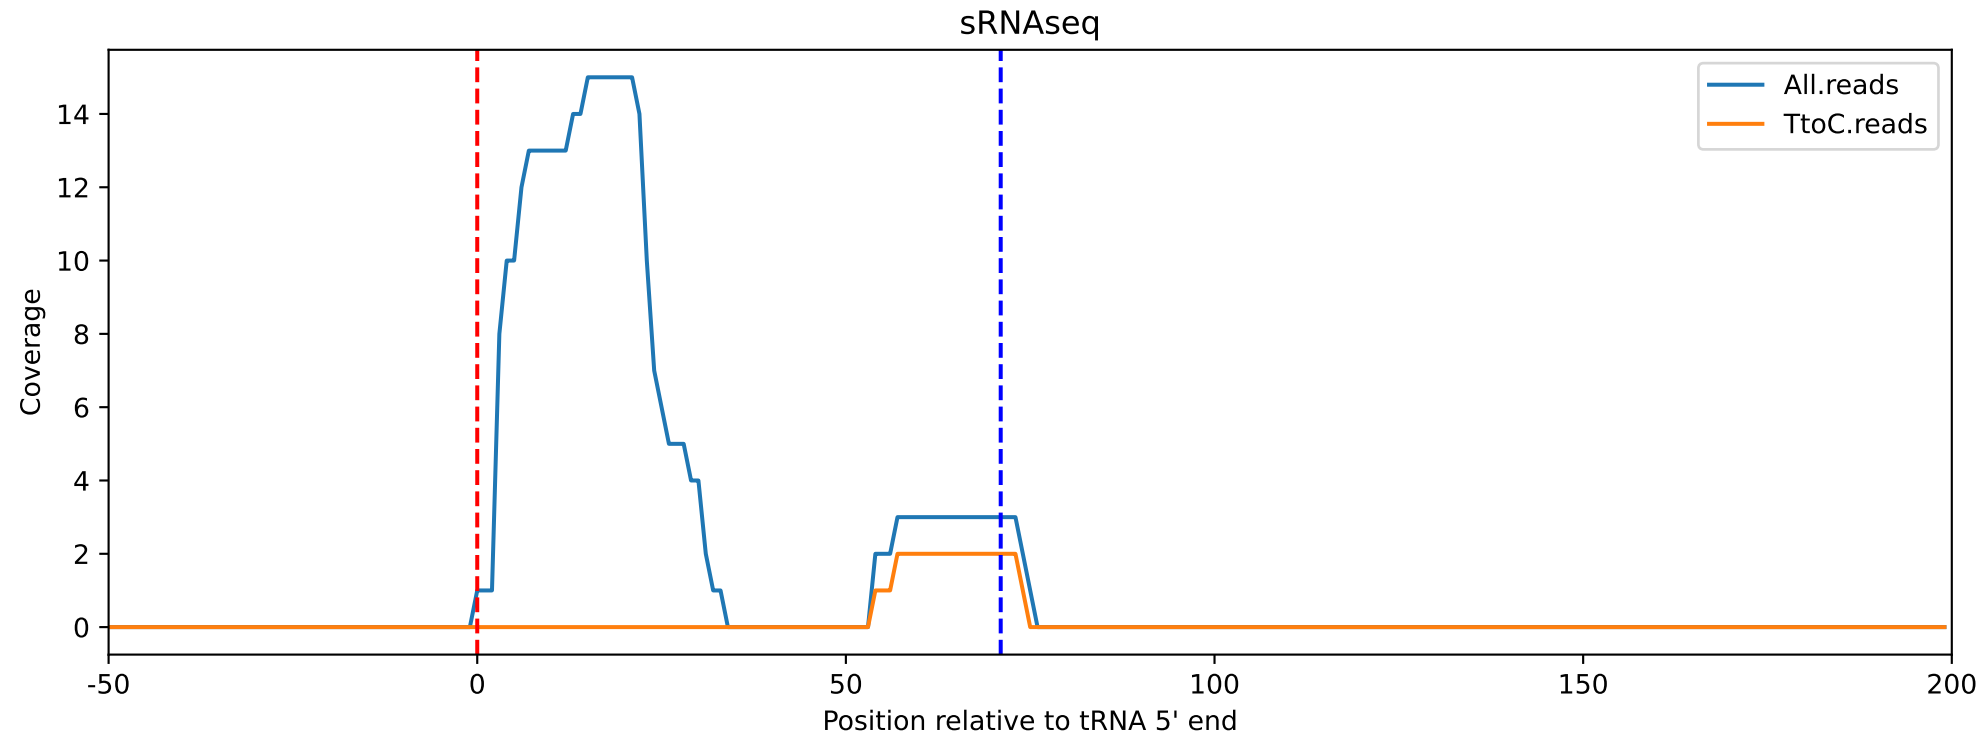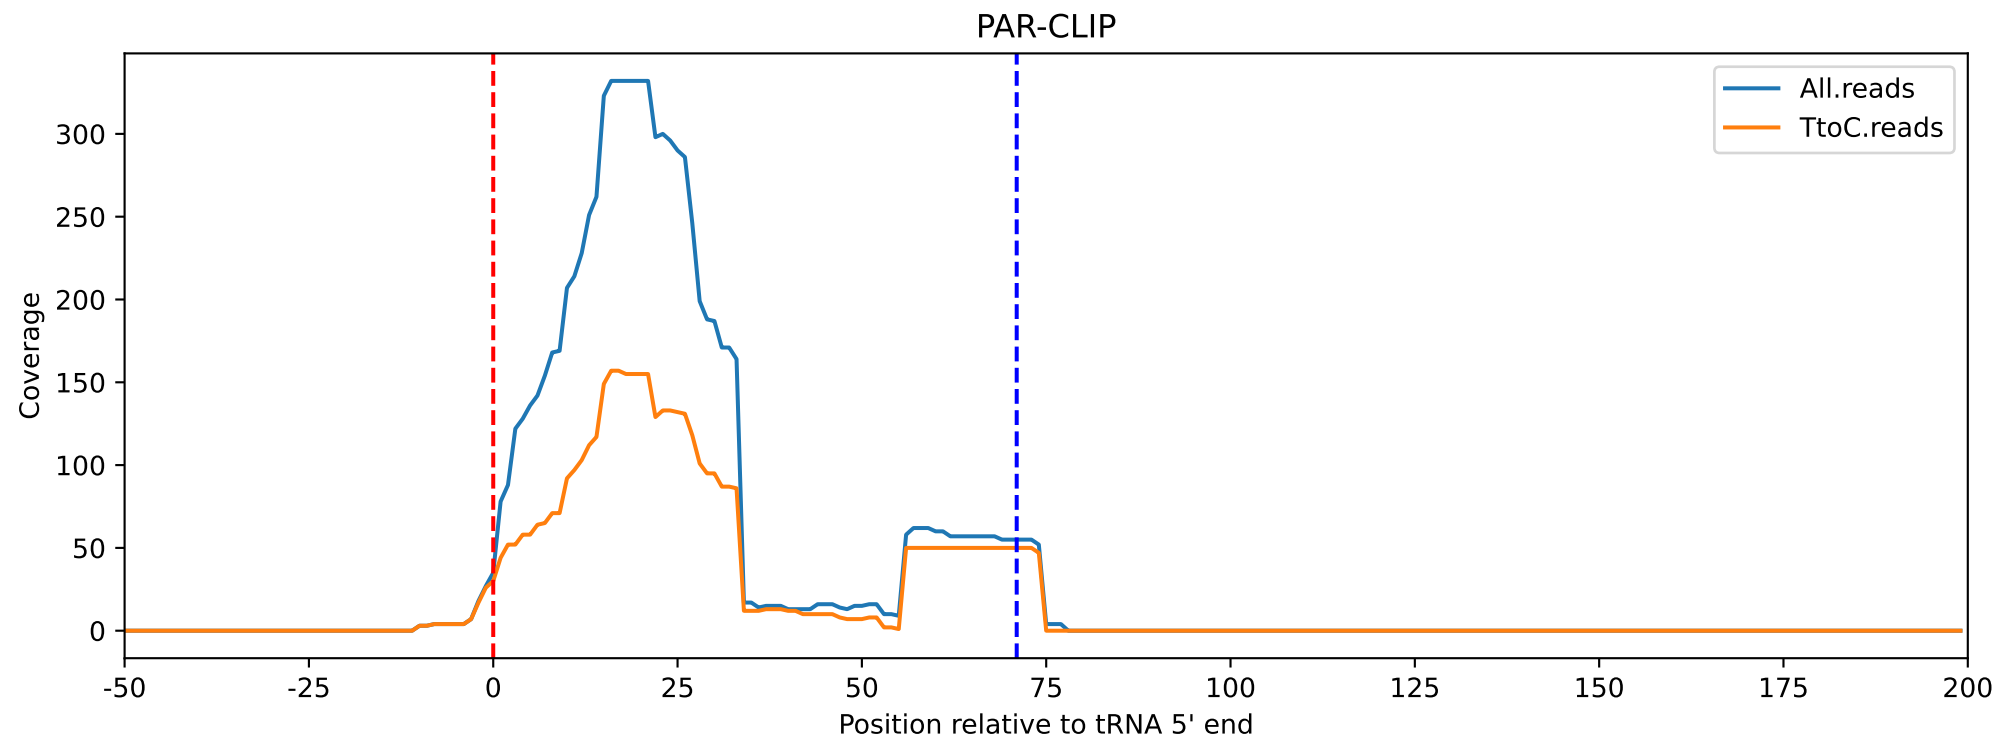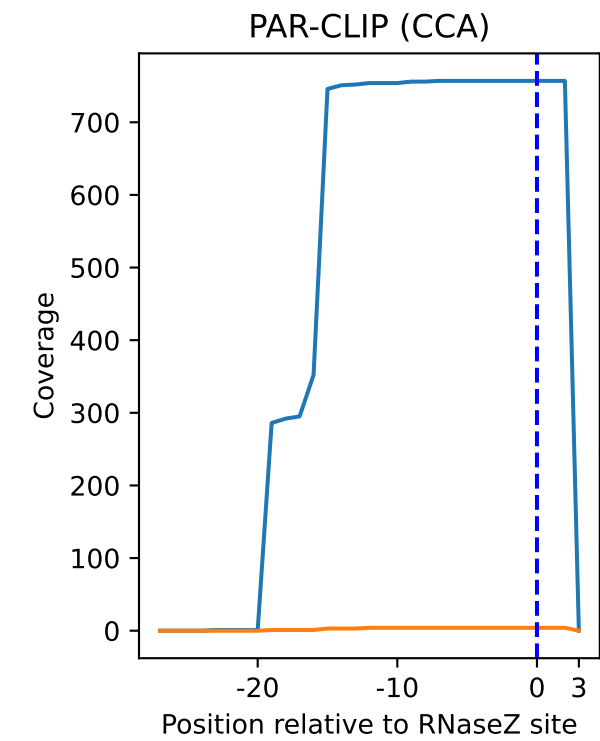

# tRNA-Pro-AGG-1-7

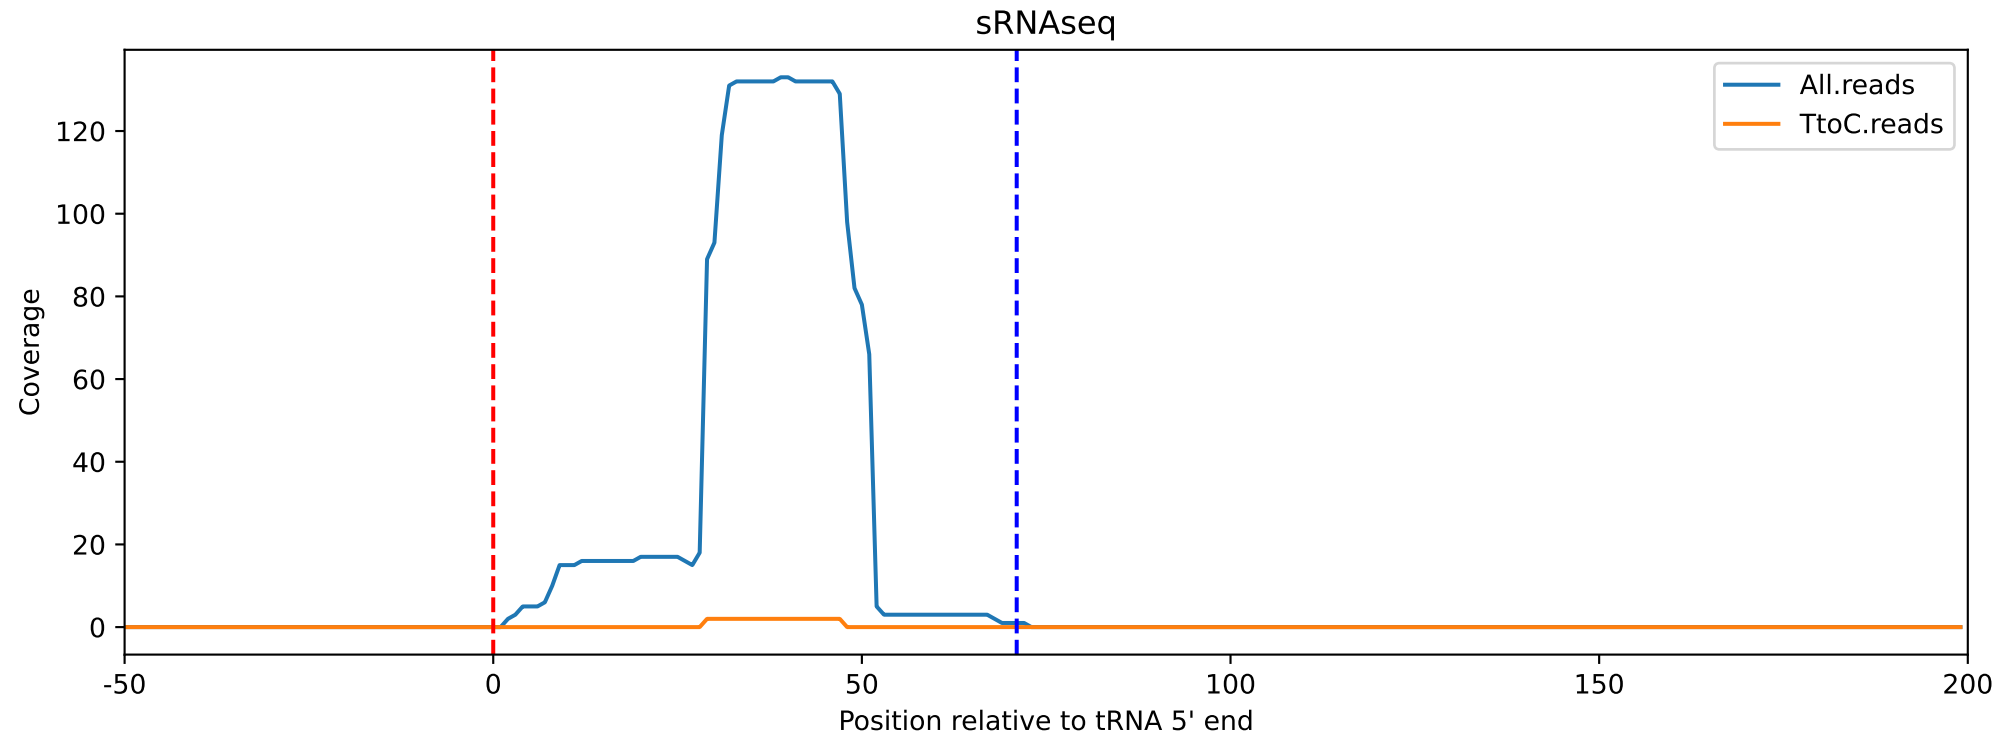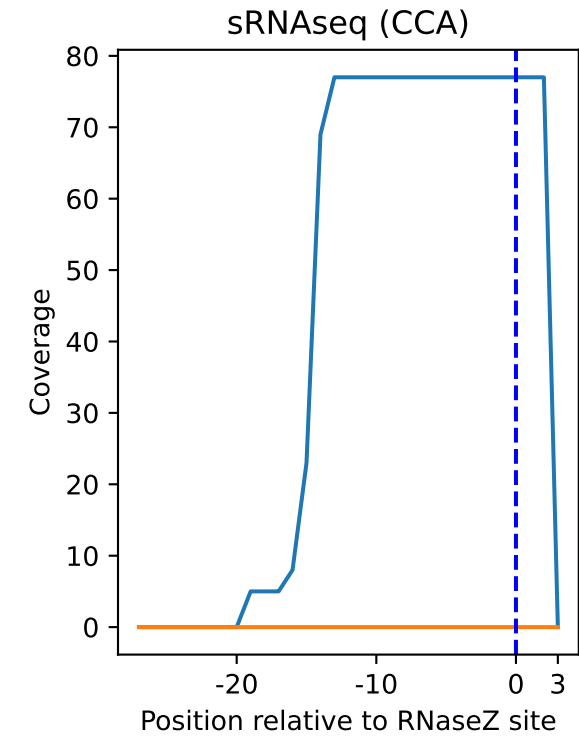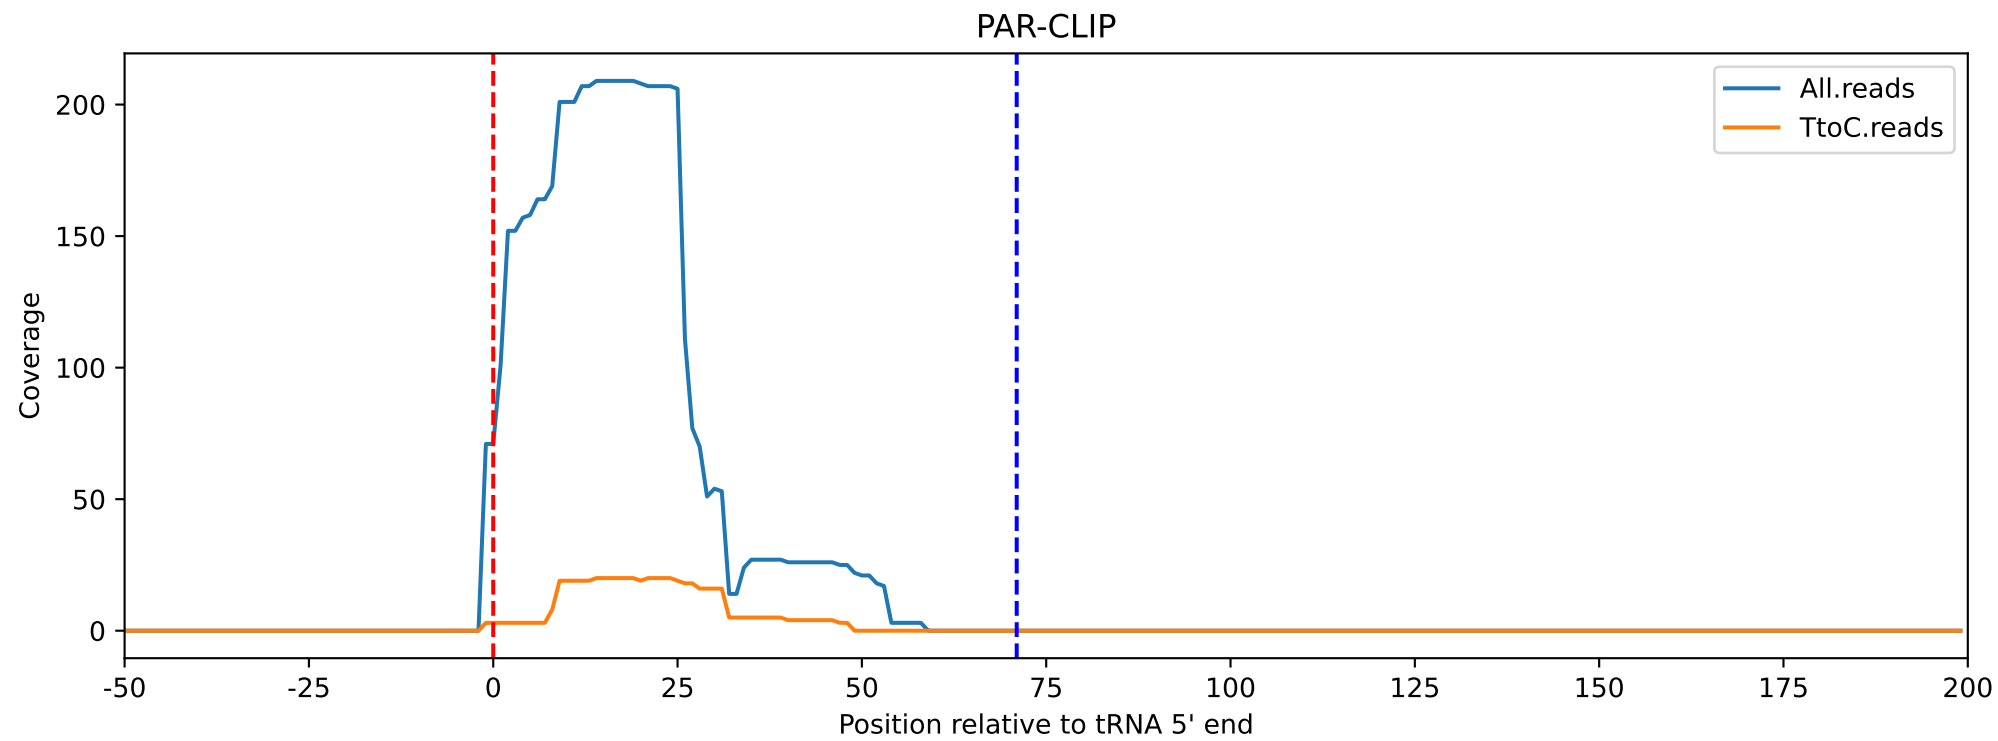

# tRNA-Lys-TTT-2-4

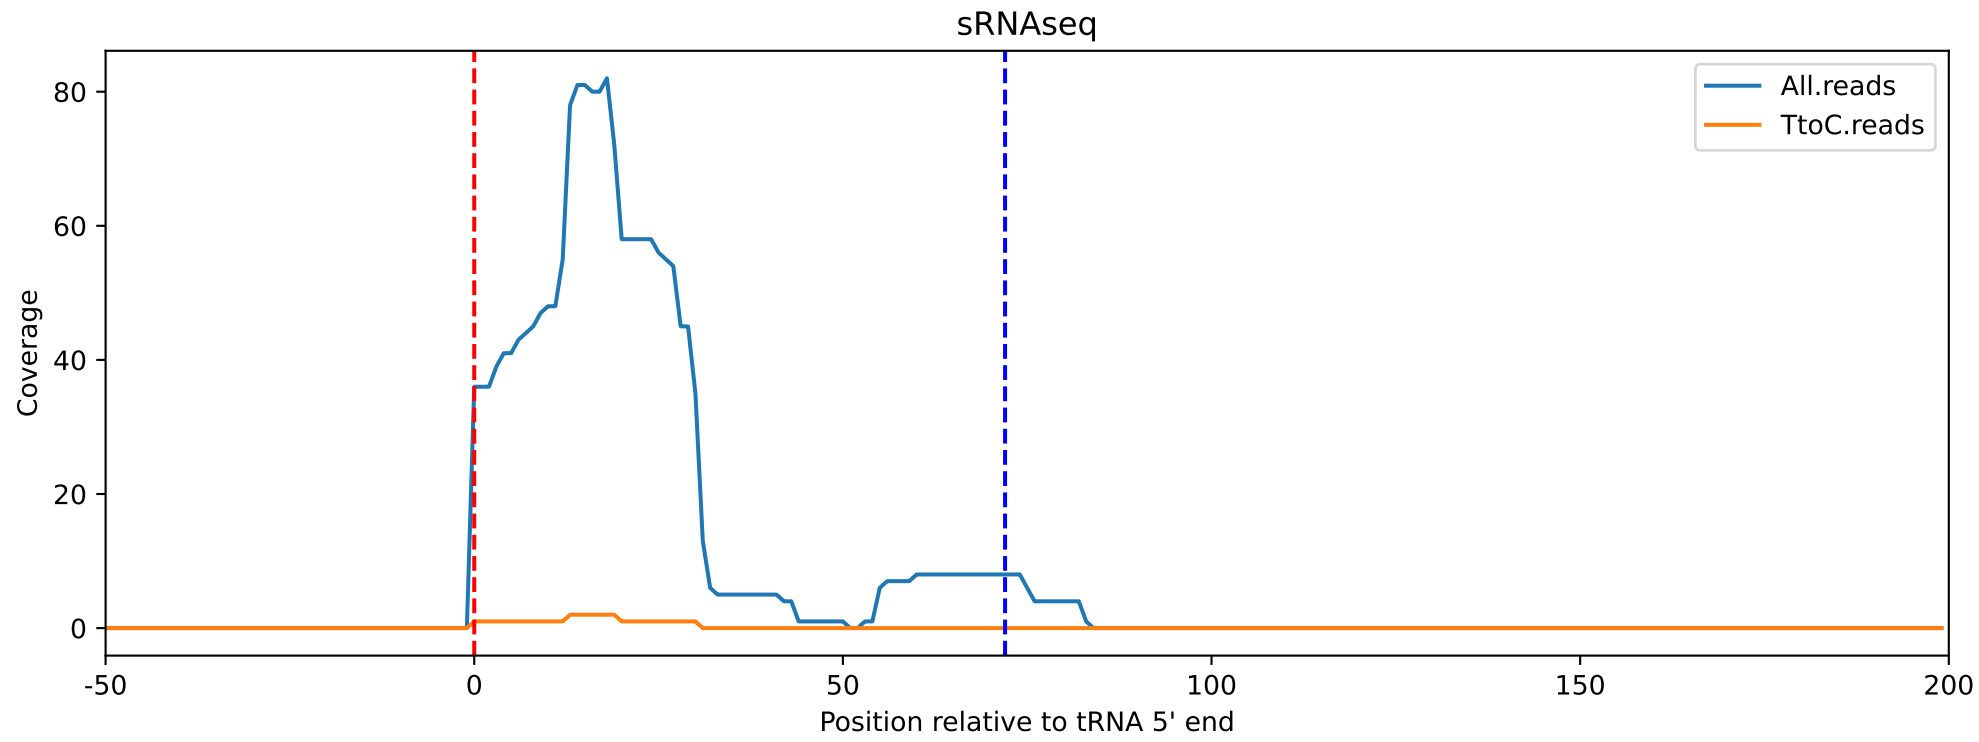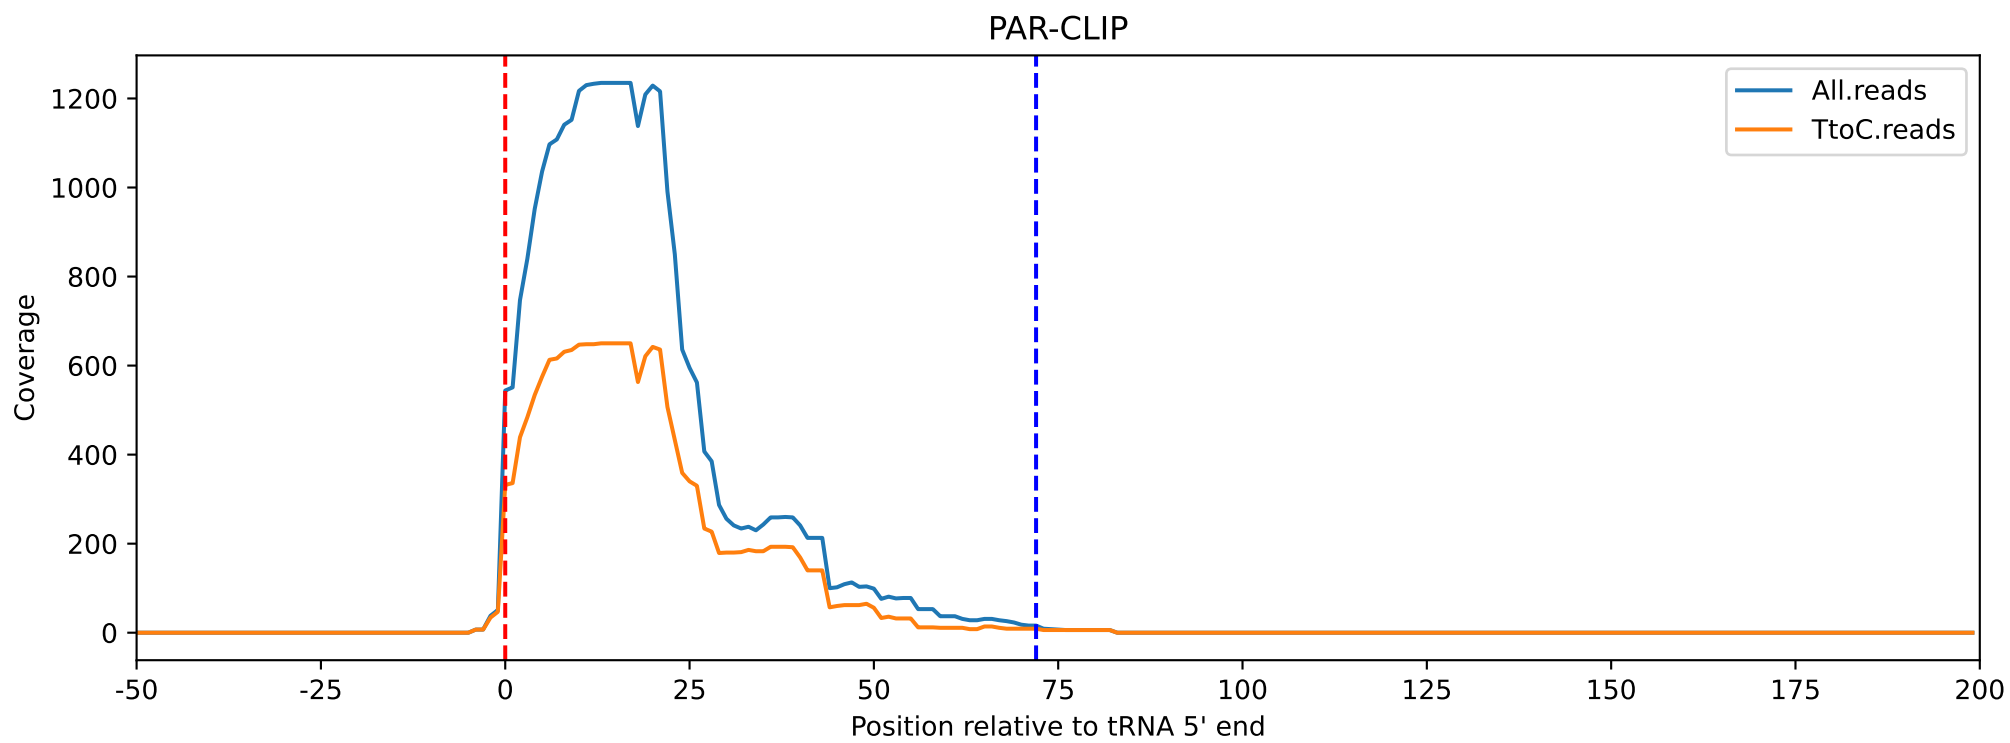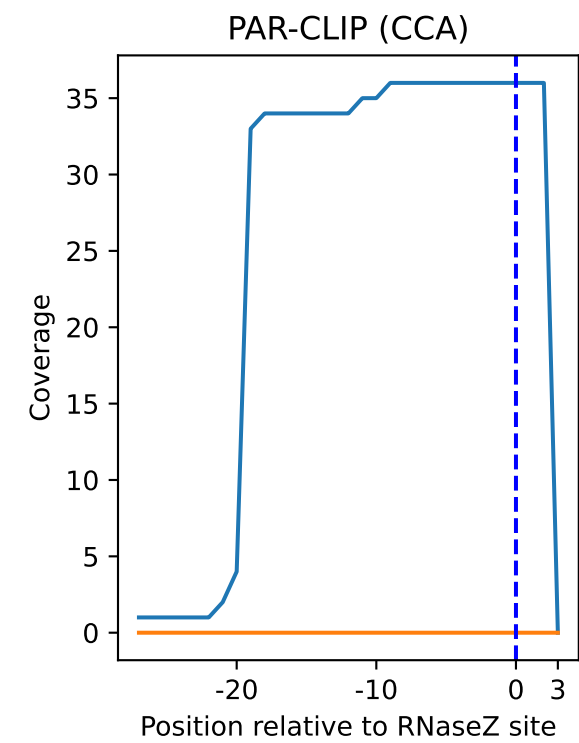

# tRNA-Thr-AGT-1-4

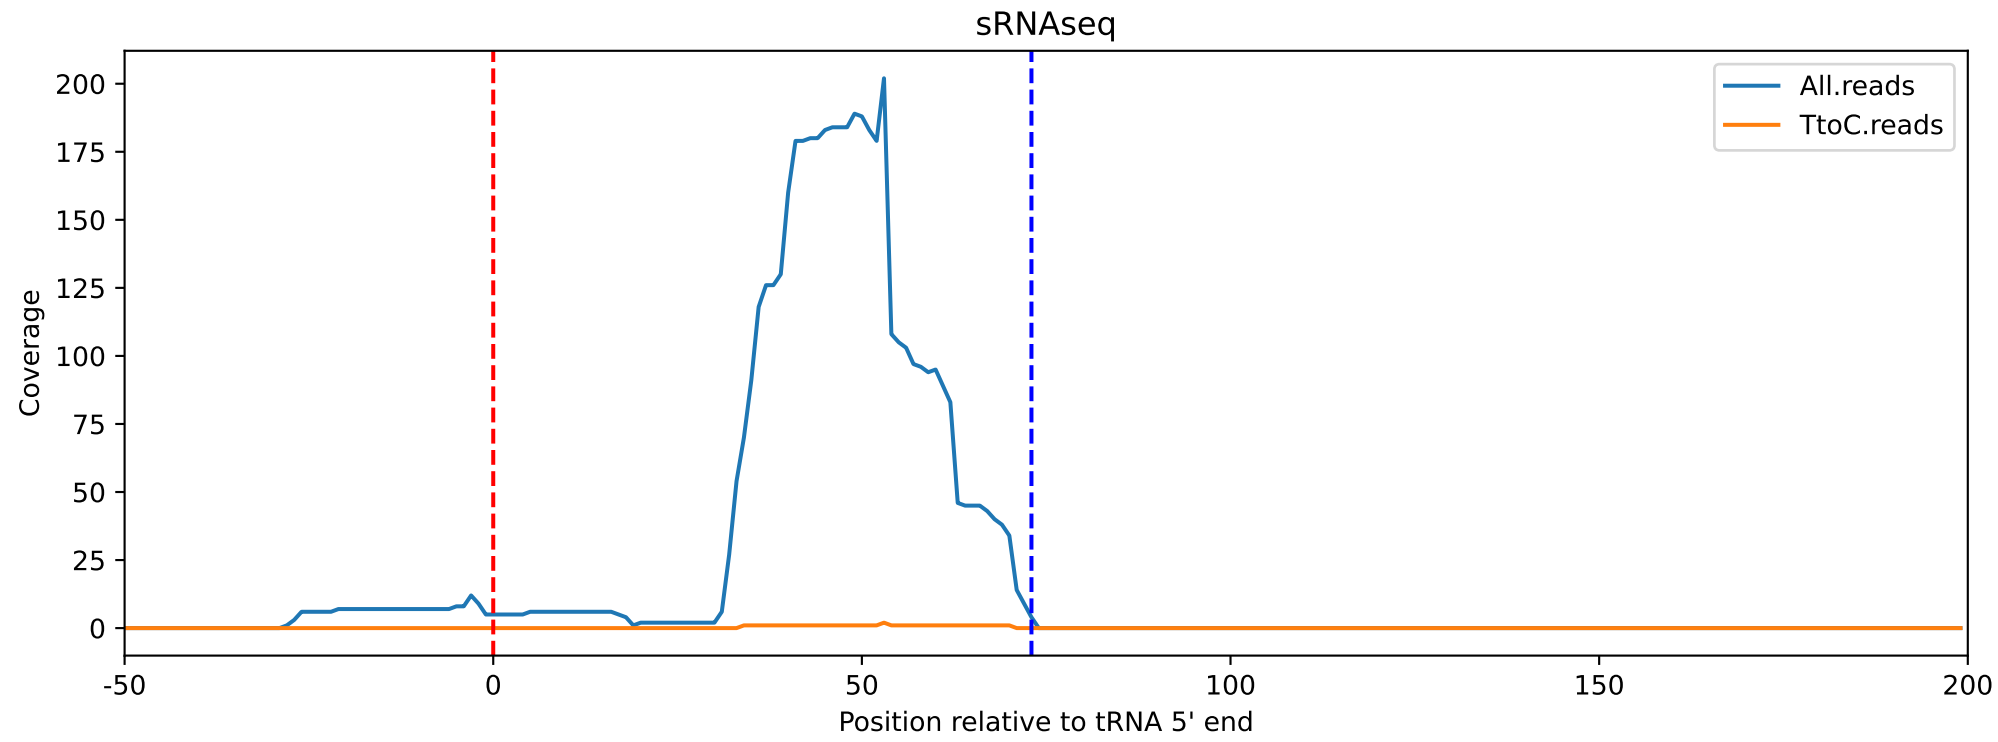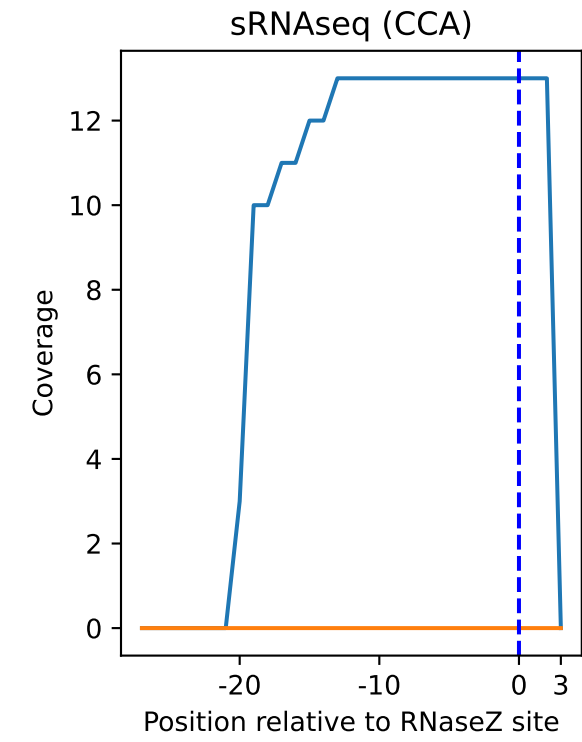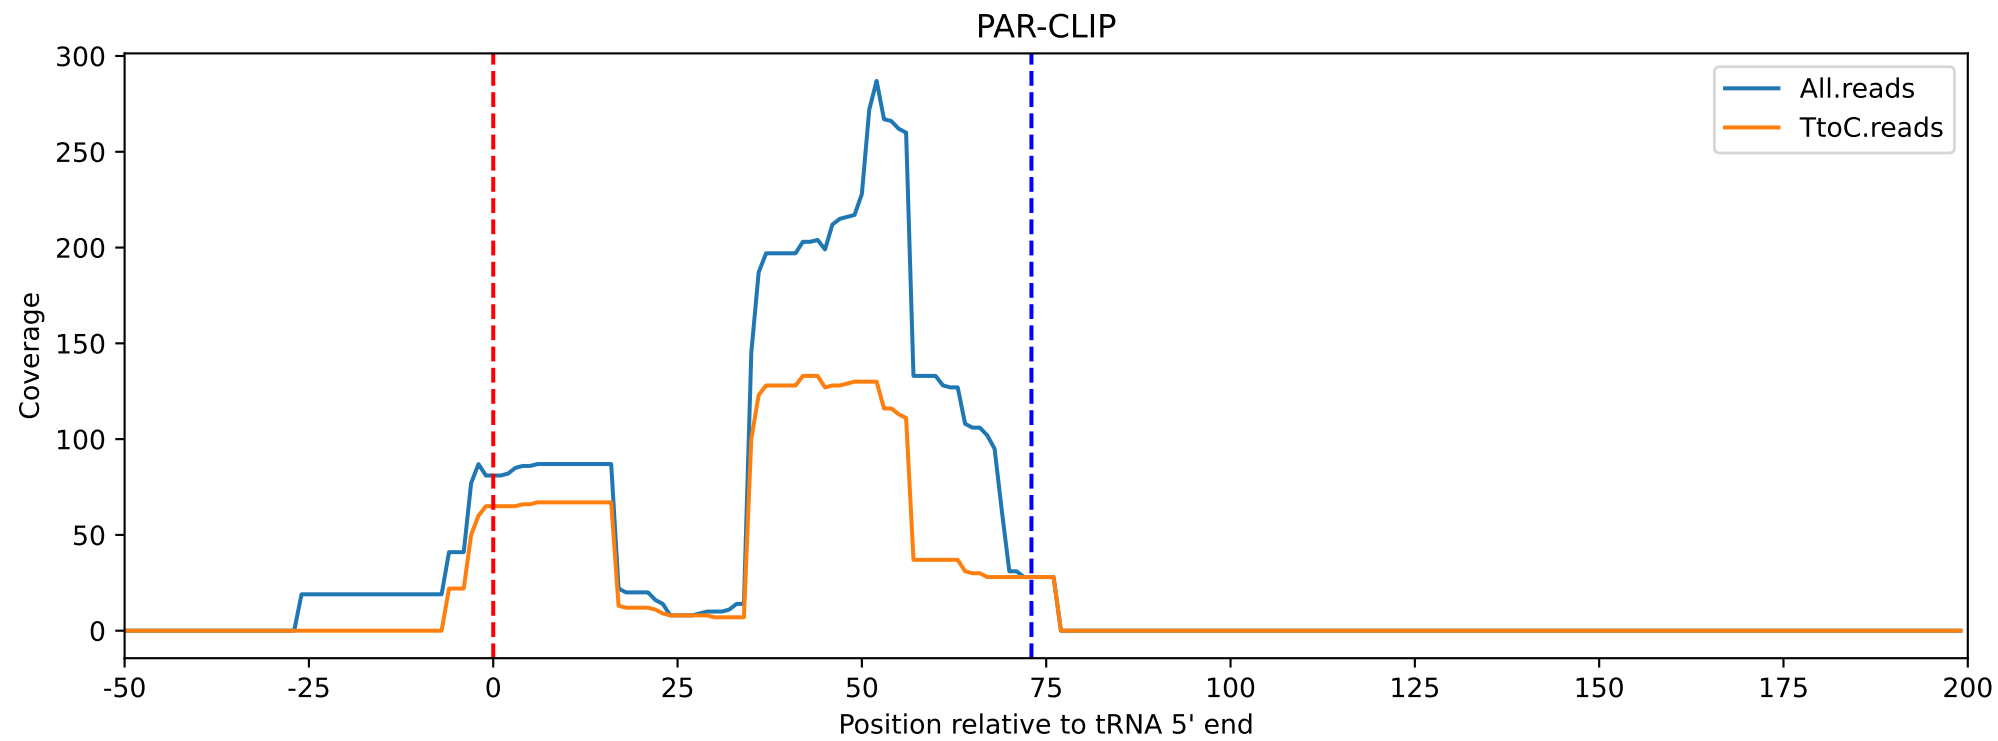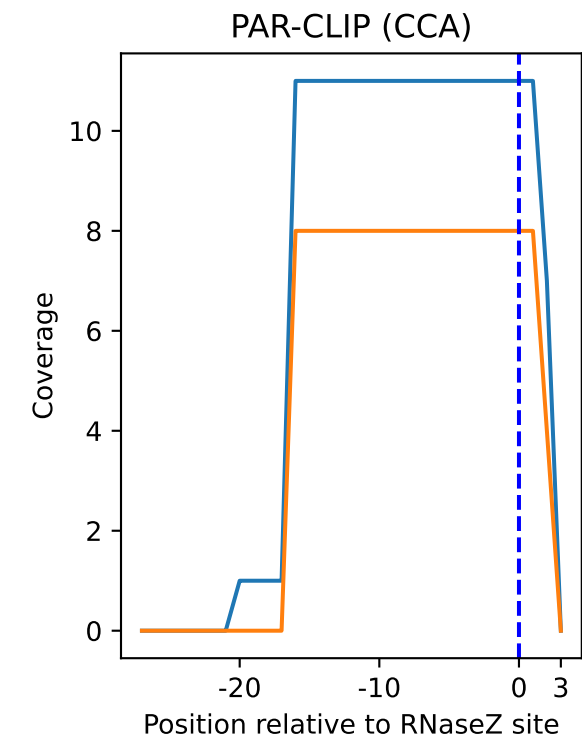

# tRNA-Val-CAC-2-5

## sRNAseq

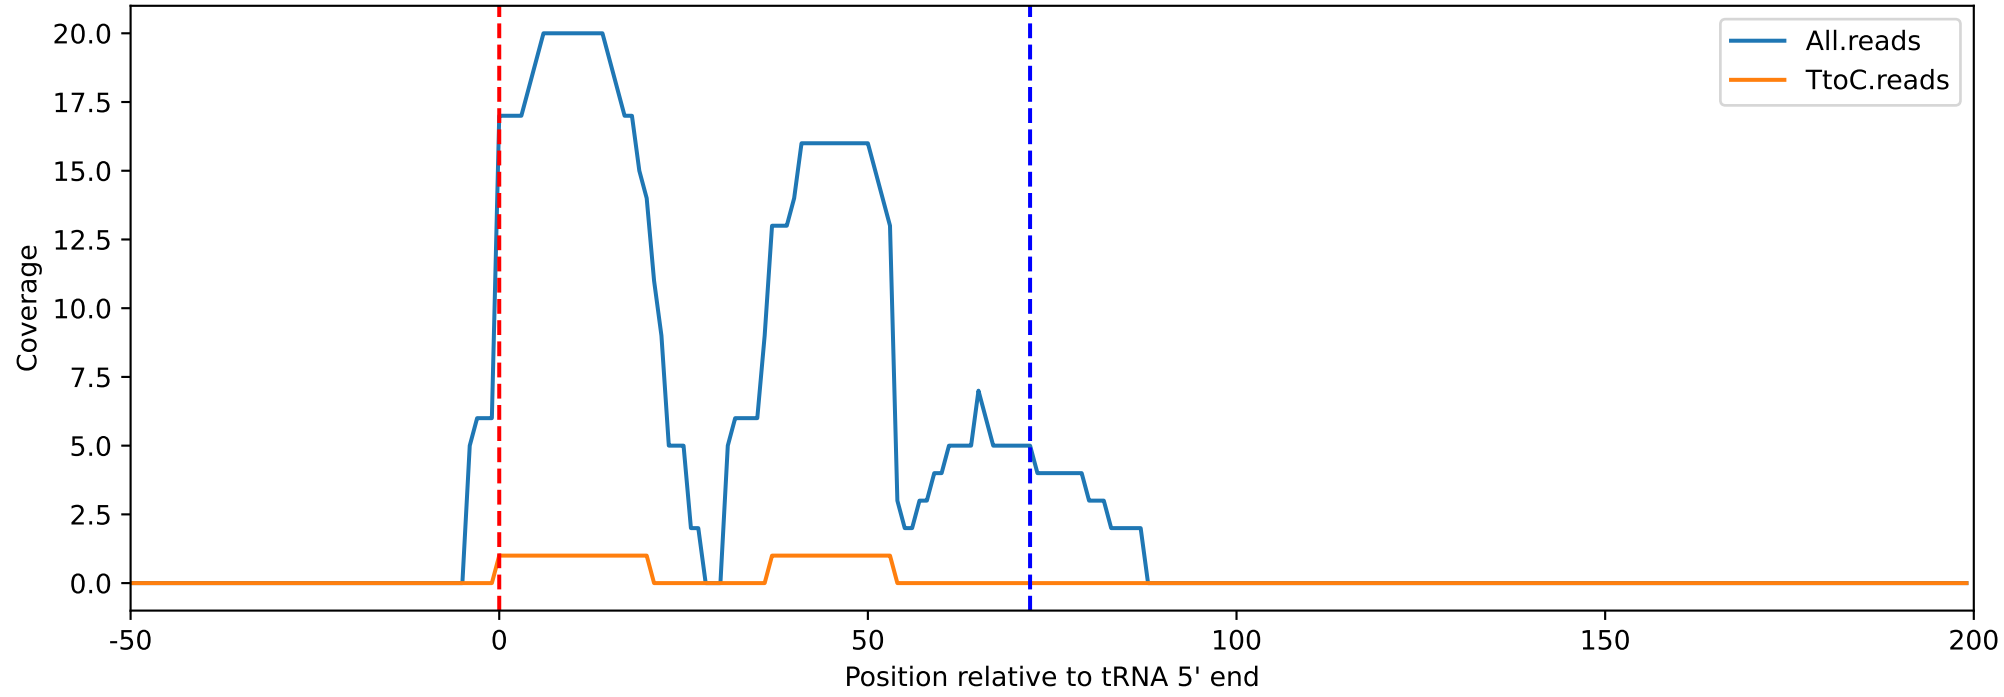

## sRNAseq (CCA)



## PAR-CLIP

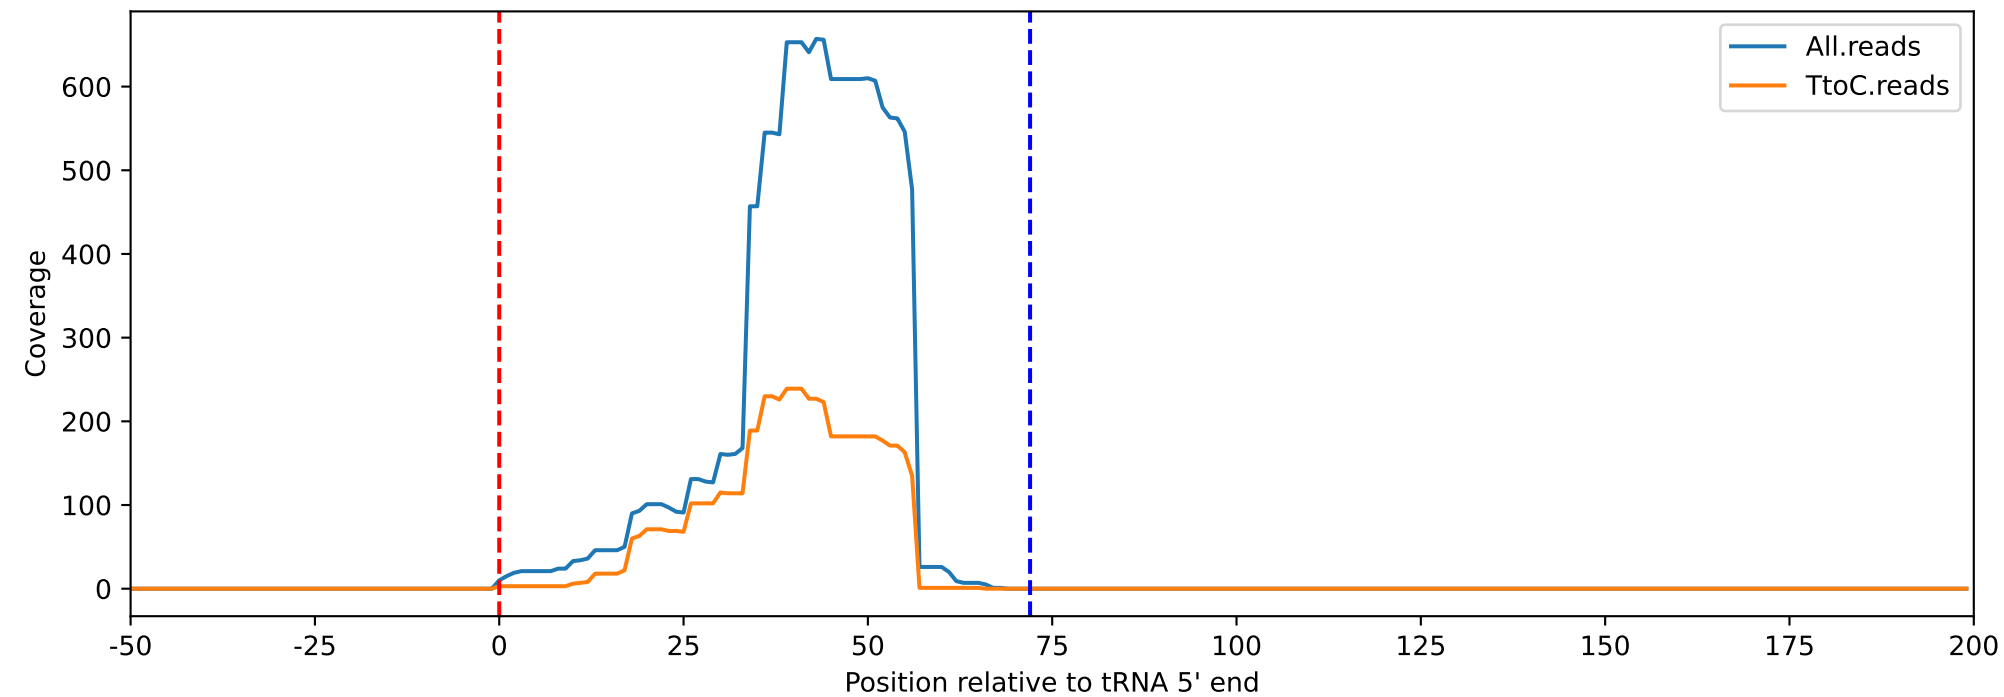

## PAR-CLIP (CCA)

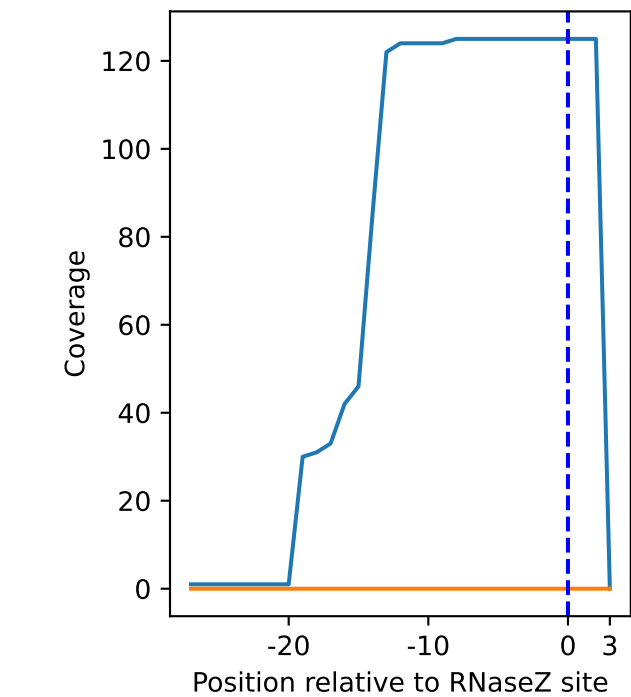

# tRNA-Gly-TCC-2-2

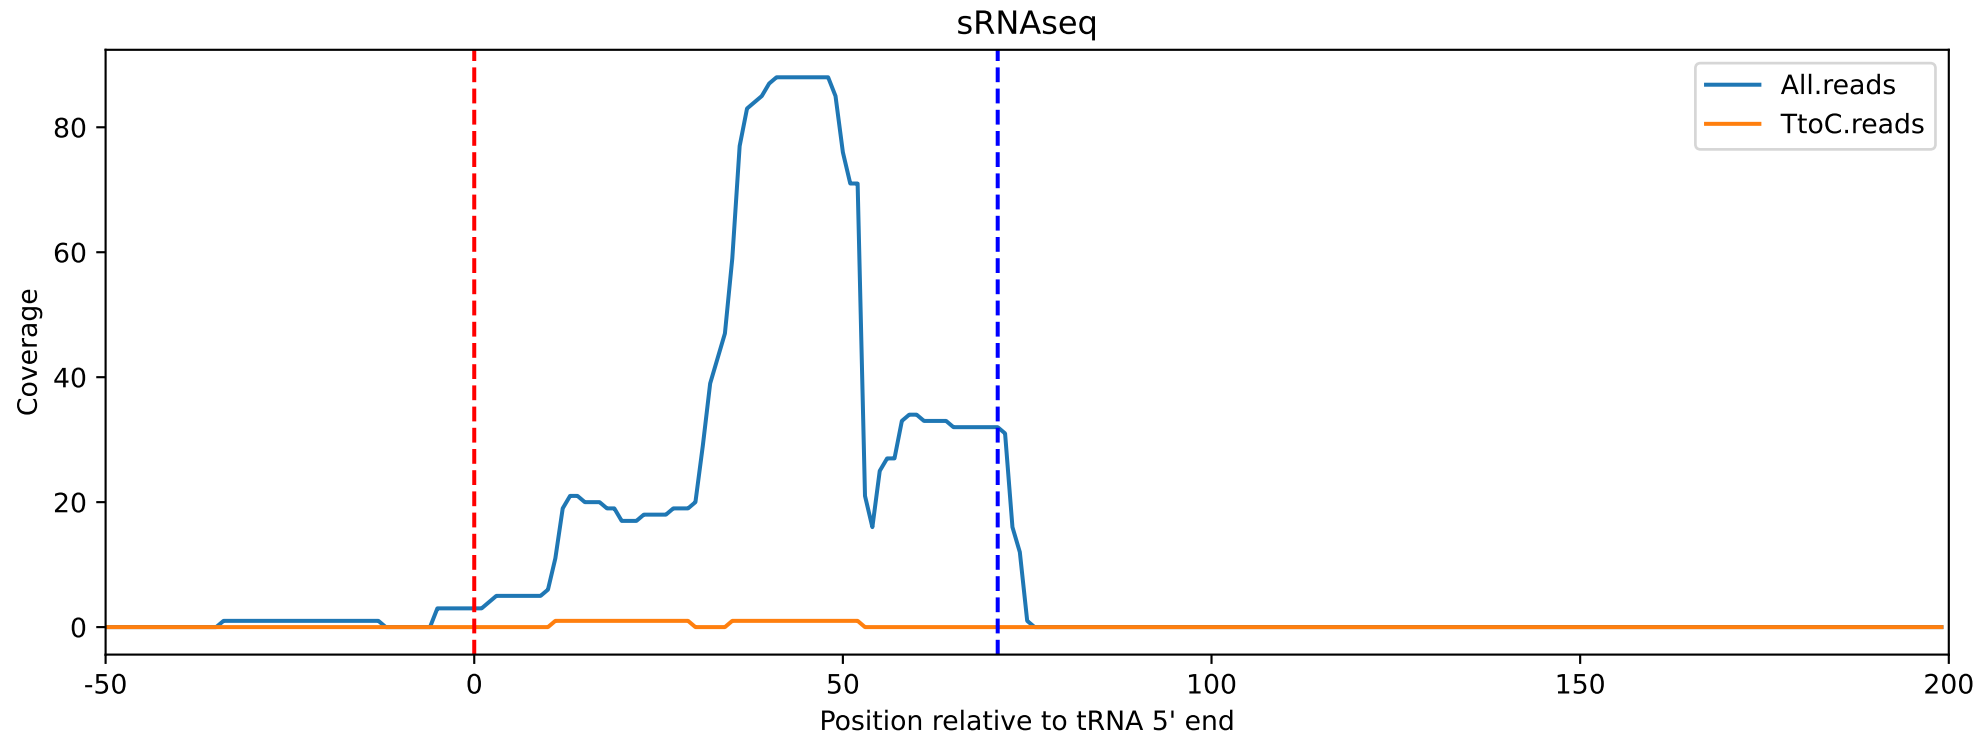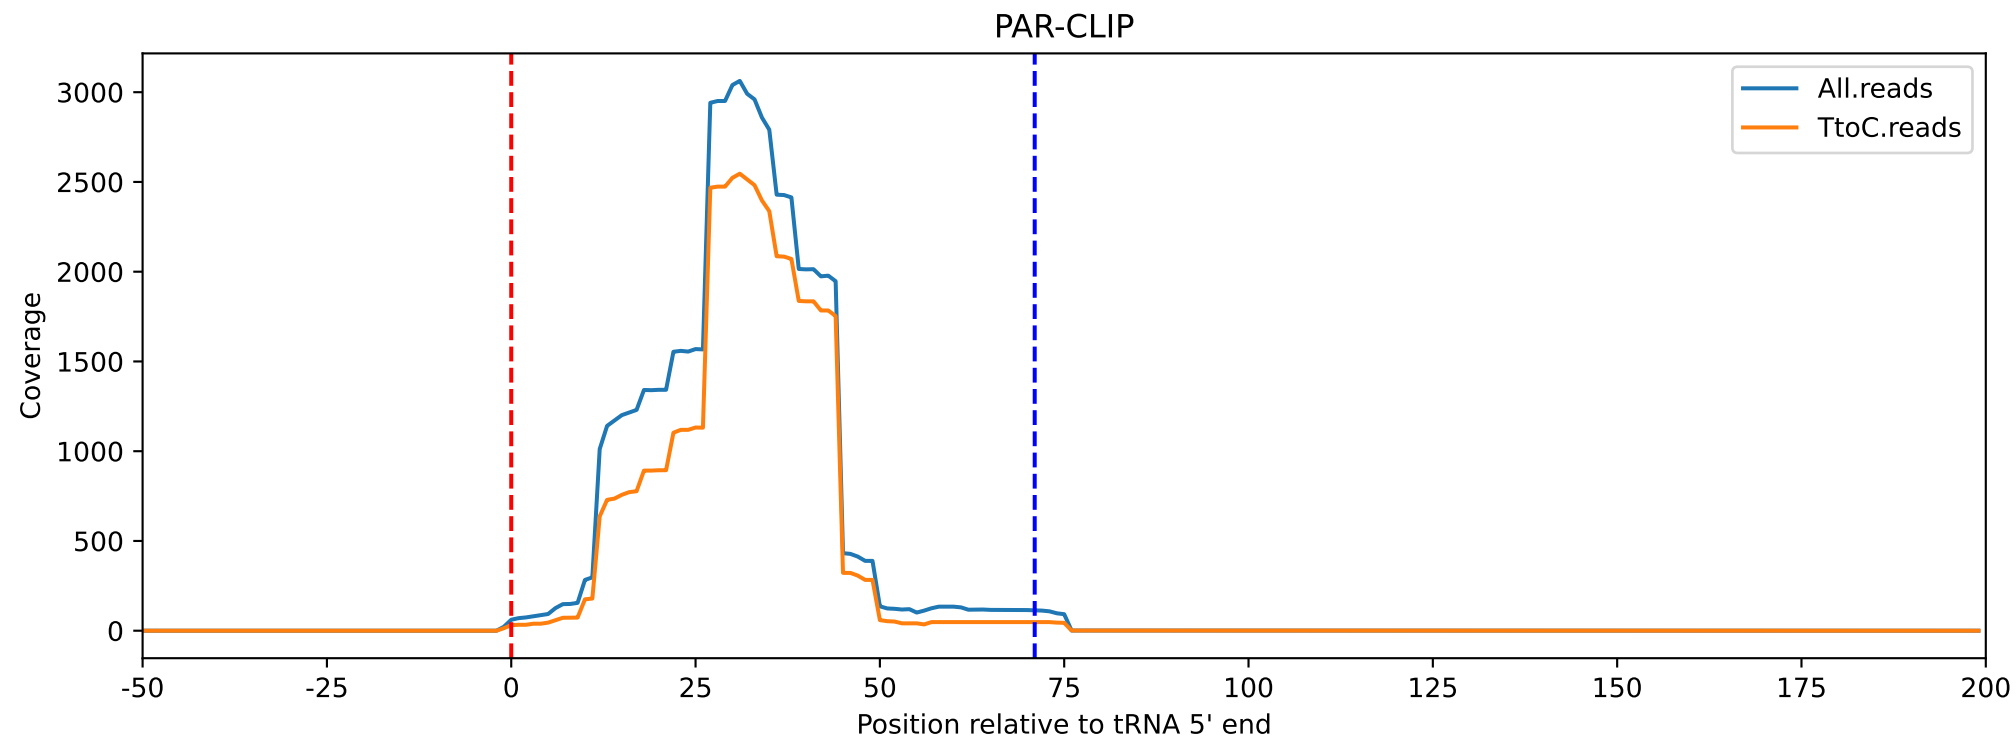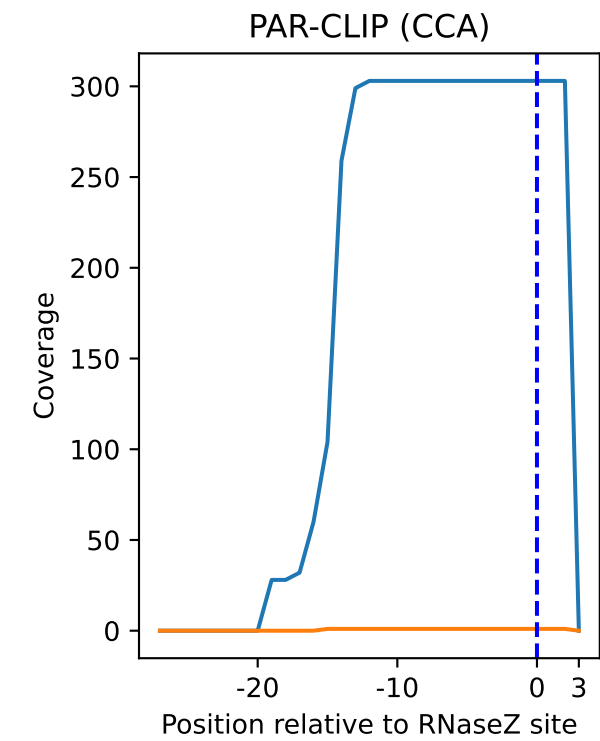

# tRNA-Leu-CAA-2-1

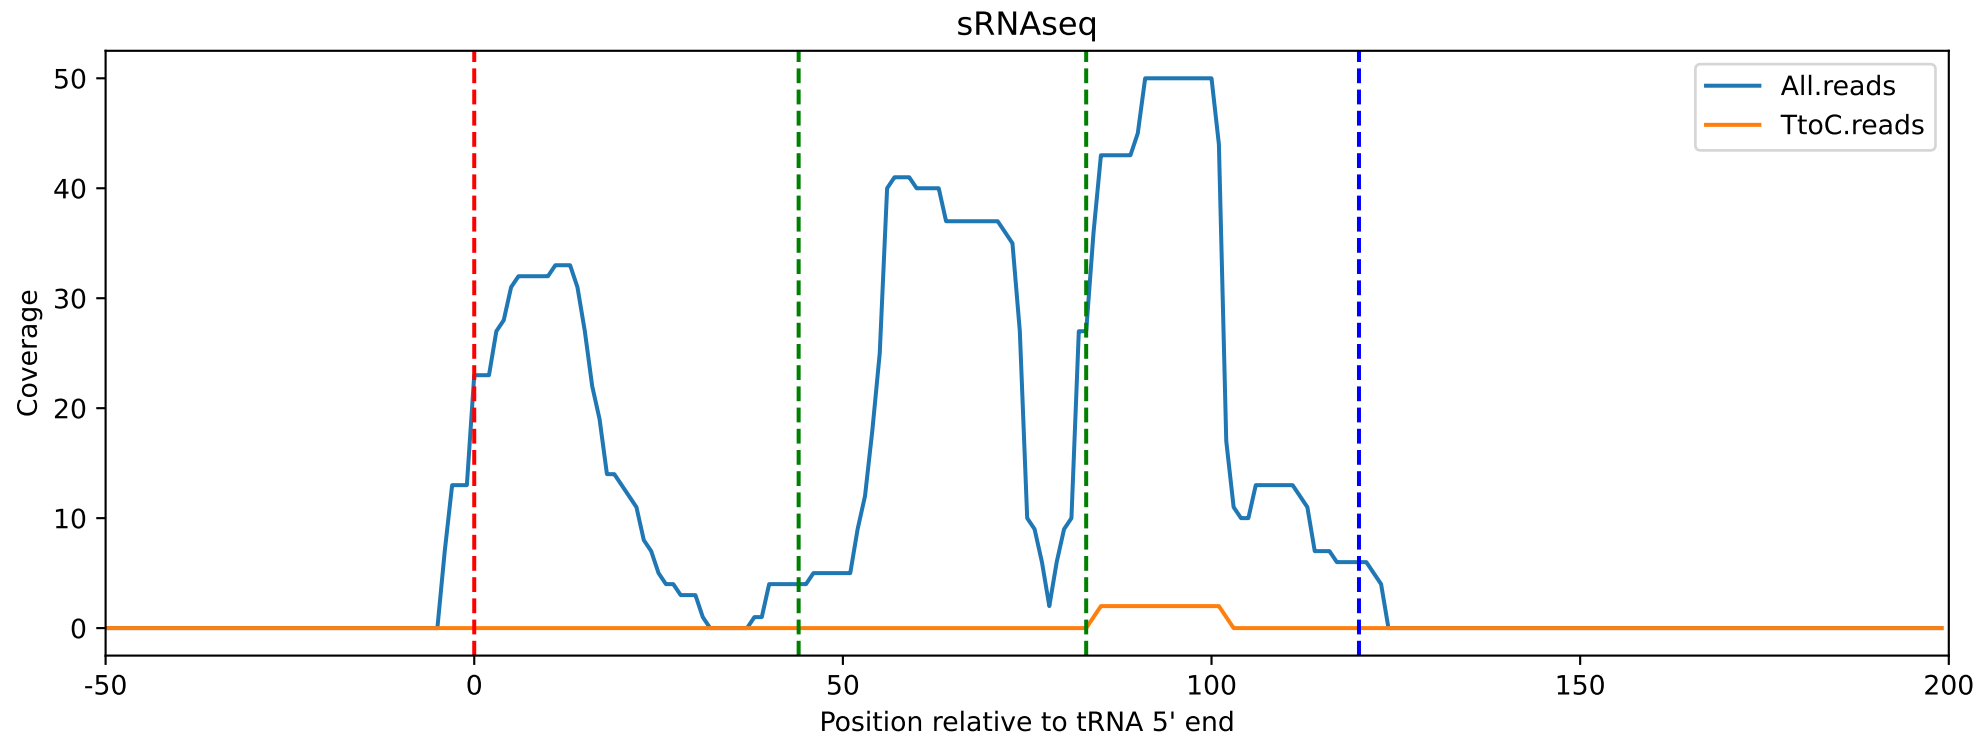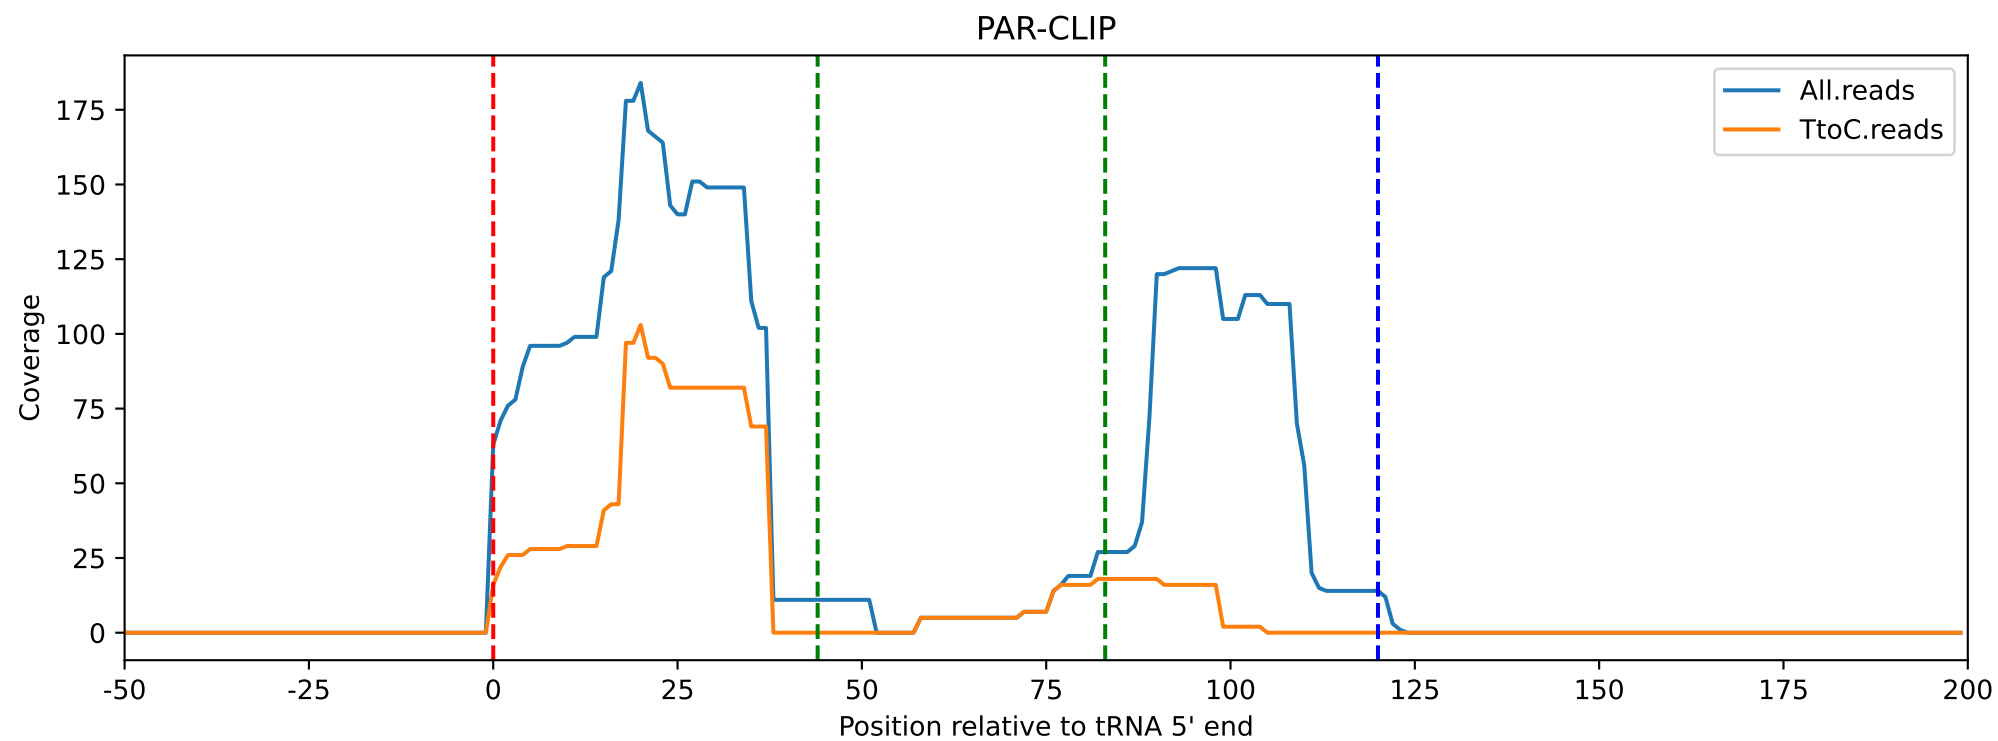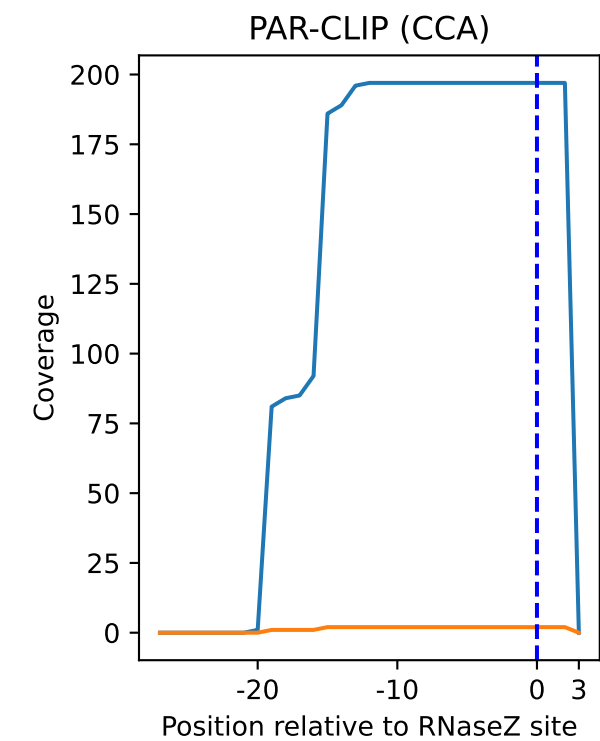



# tRNA-Ala-CGC-1-2

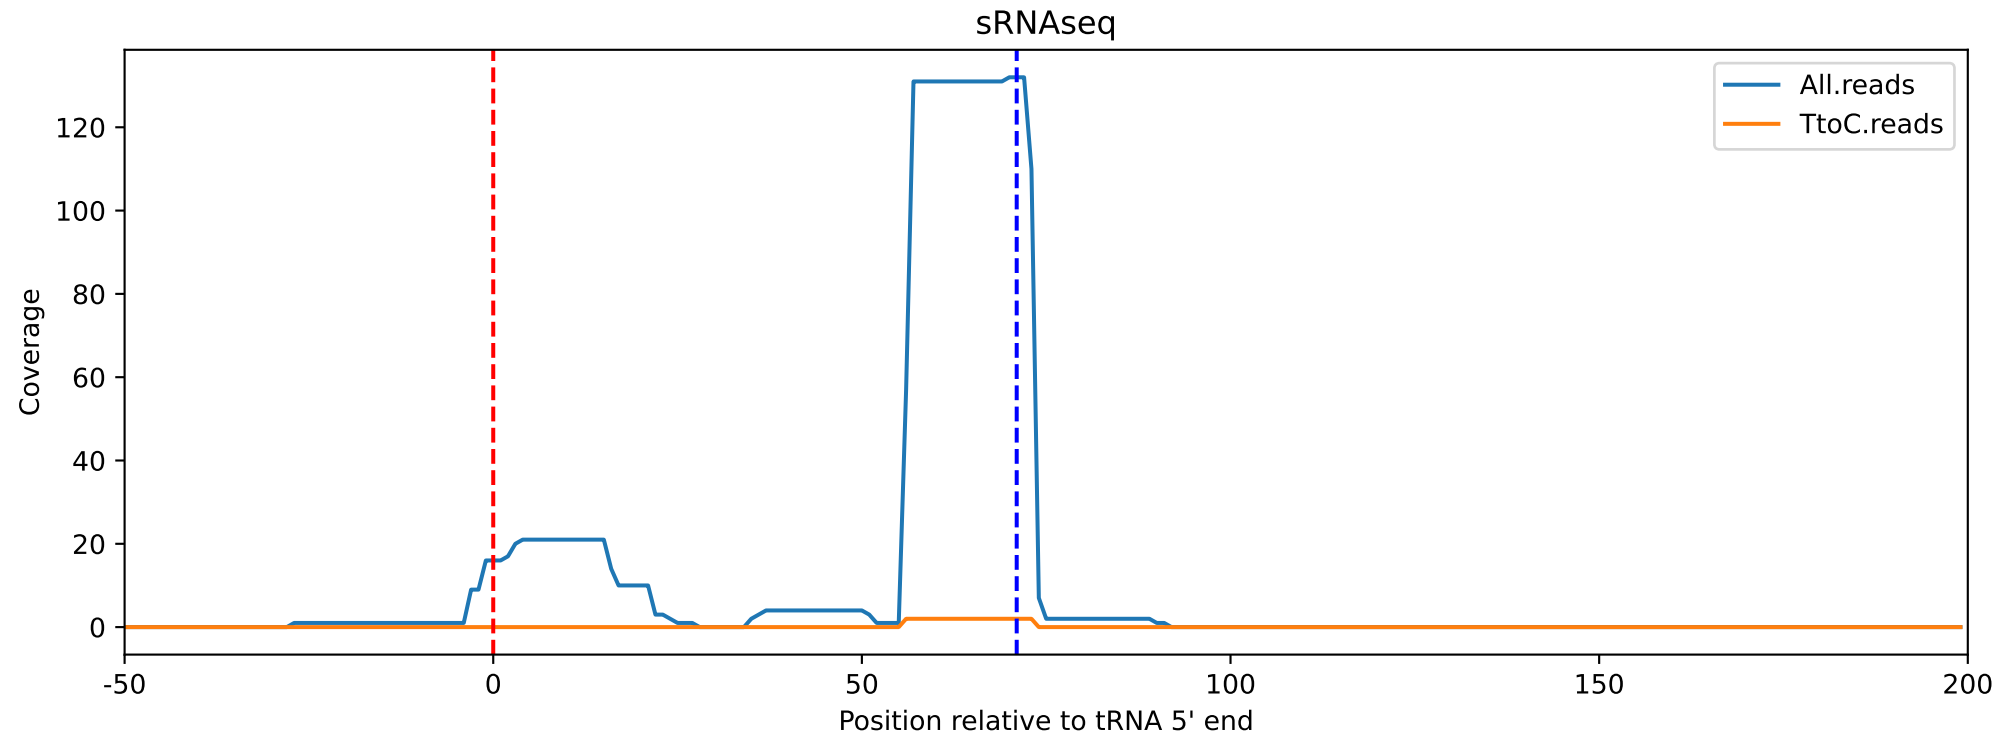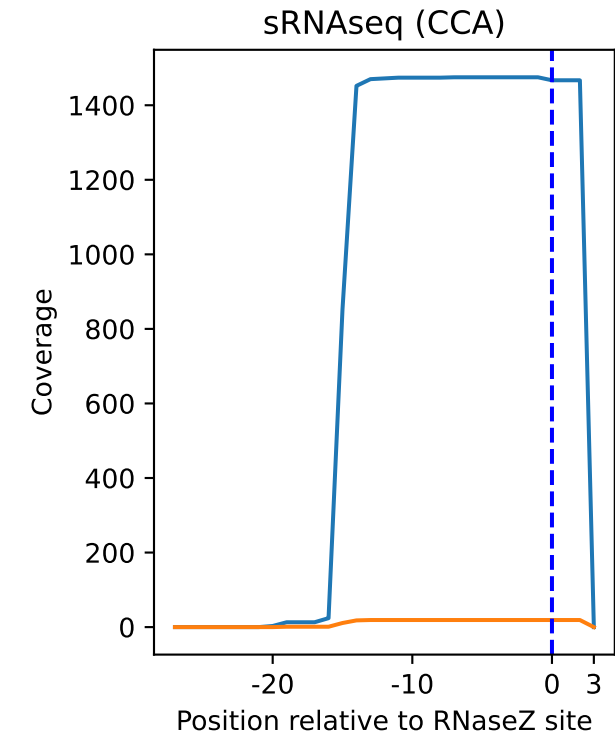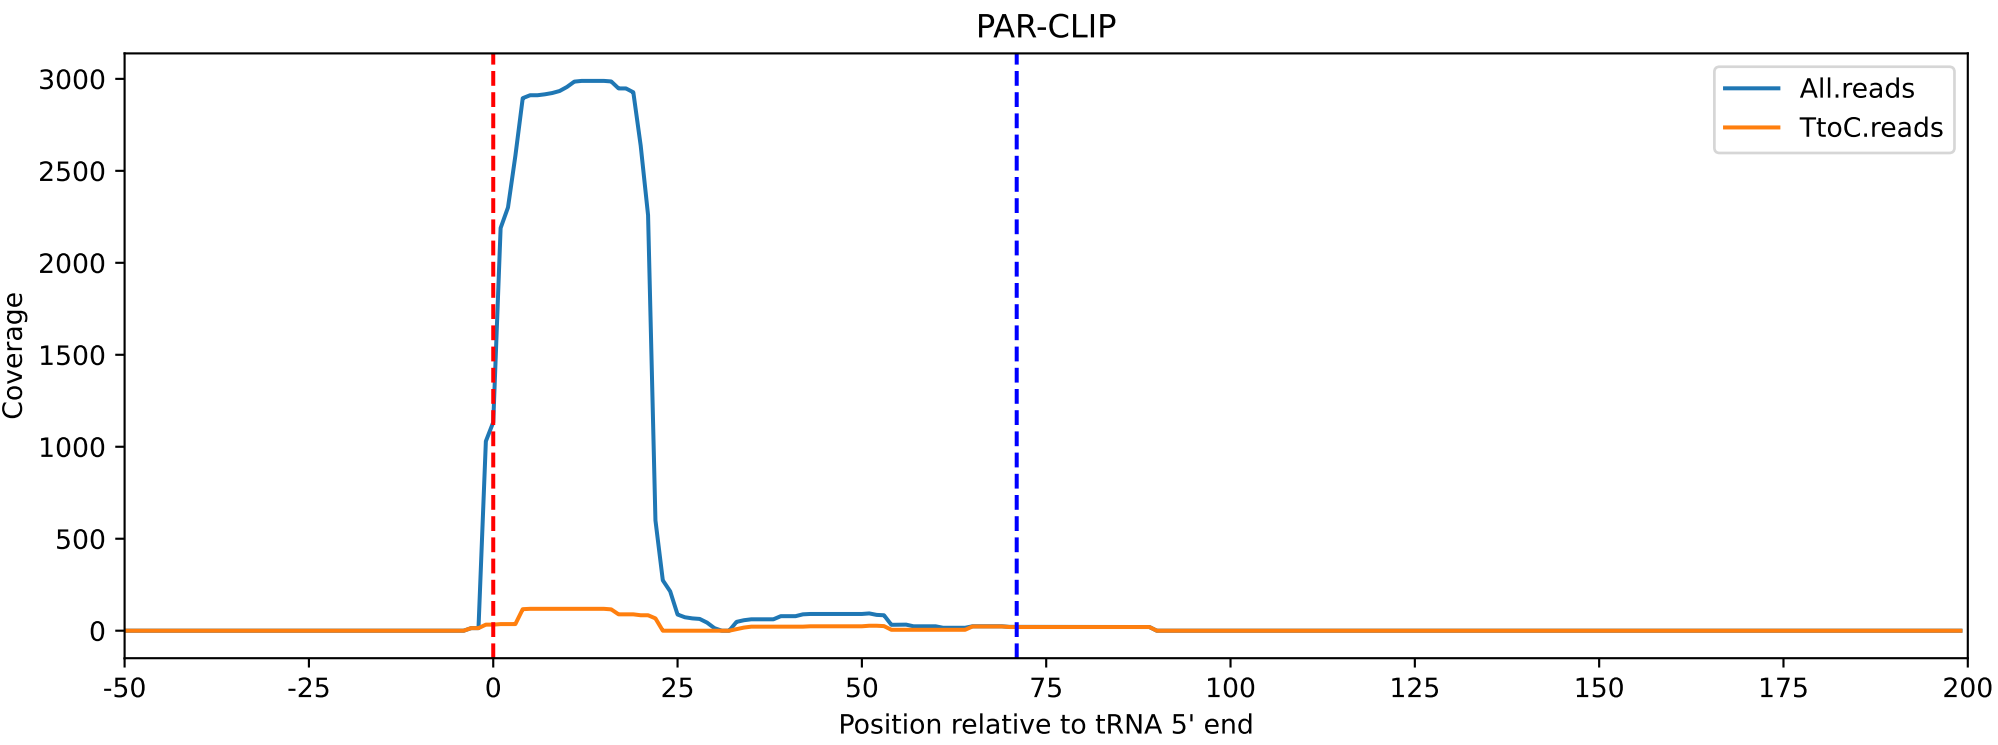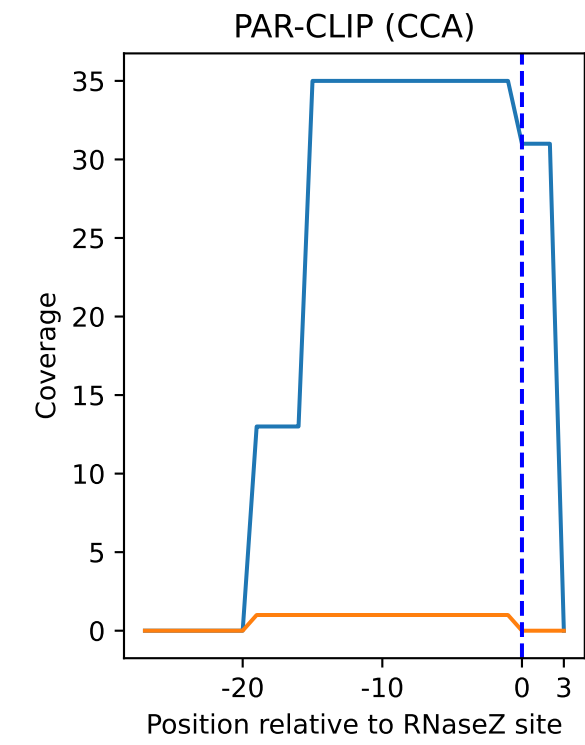

# tRNA-Val-AAC-1-2

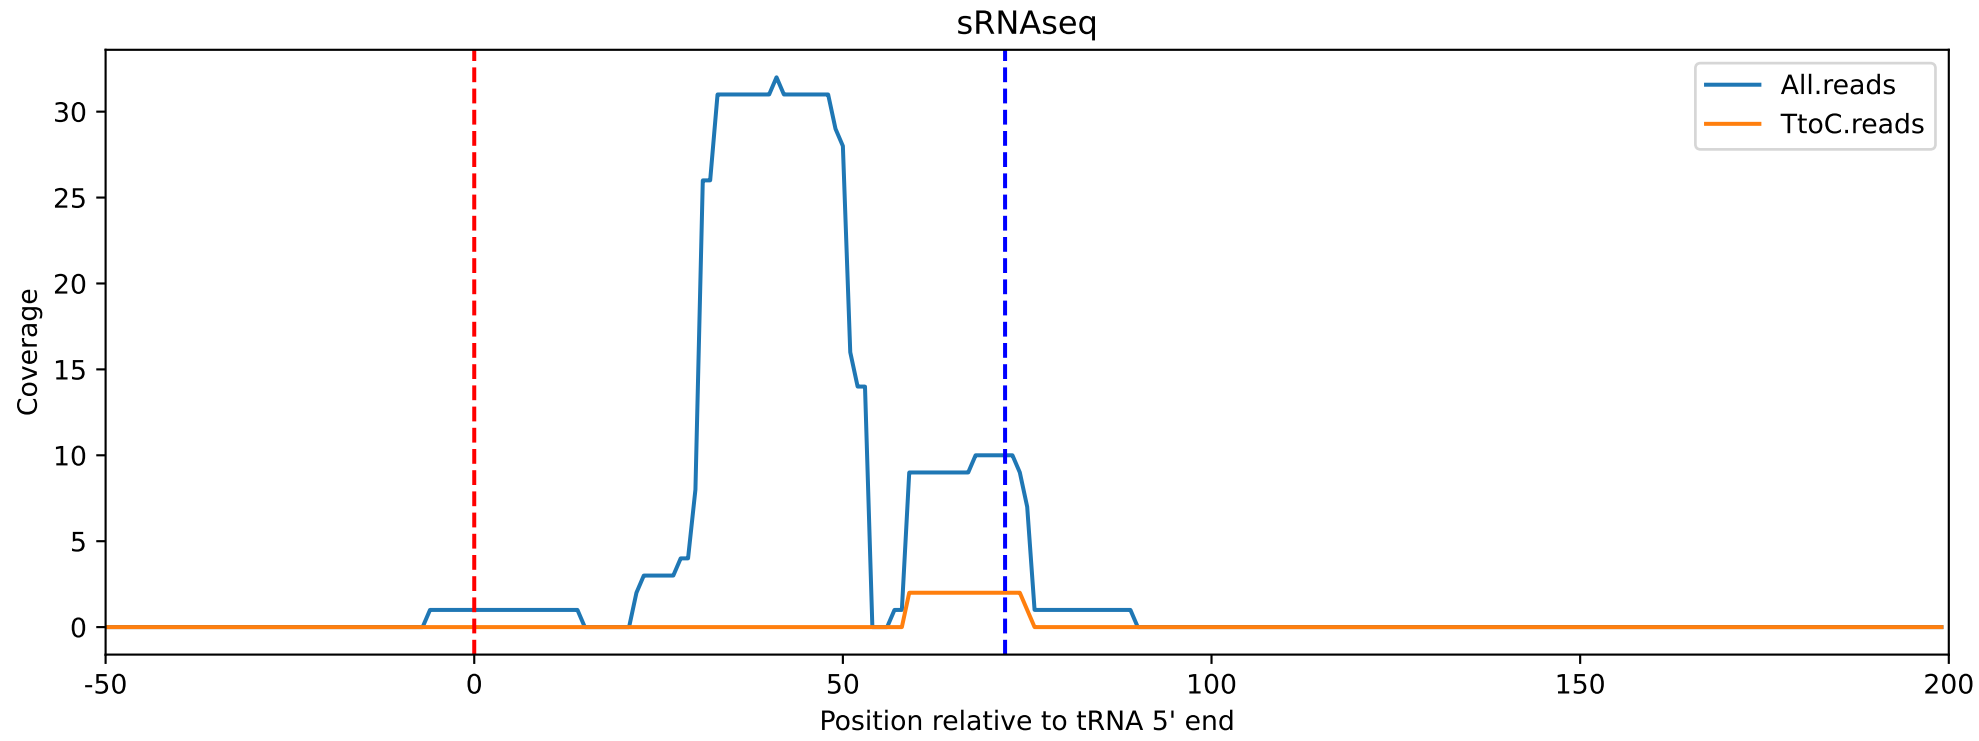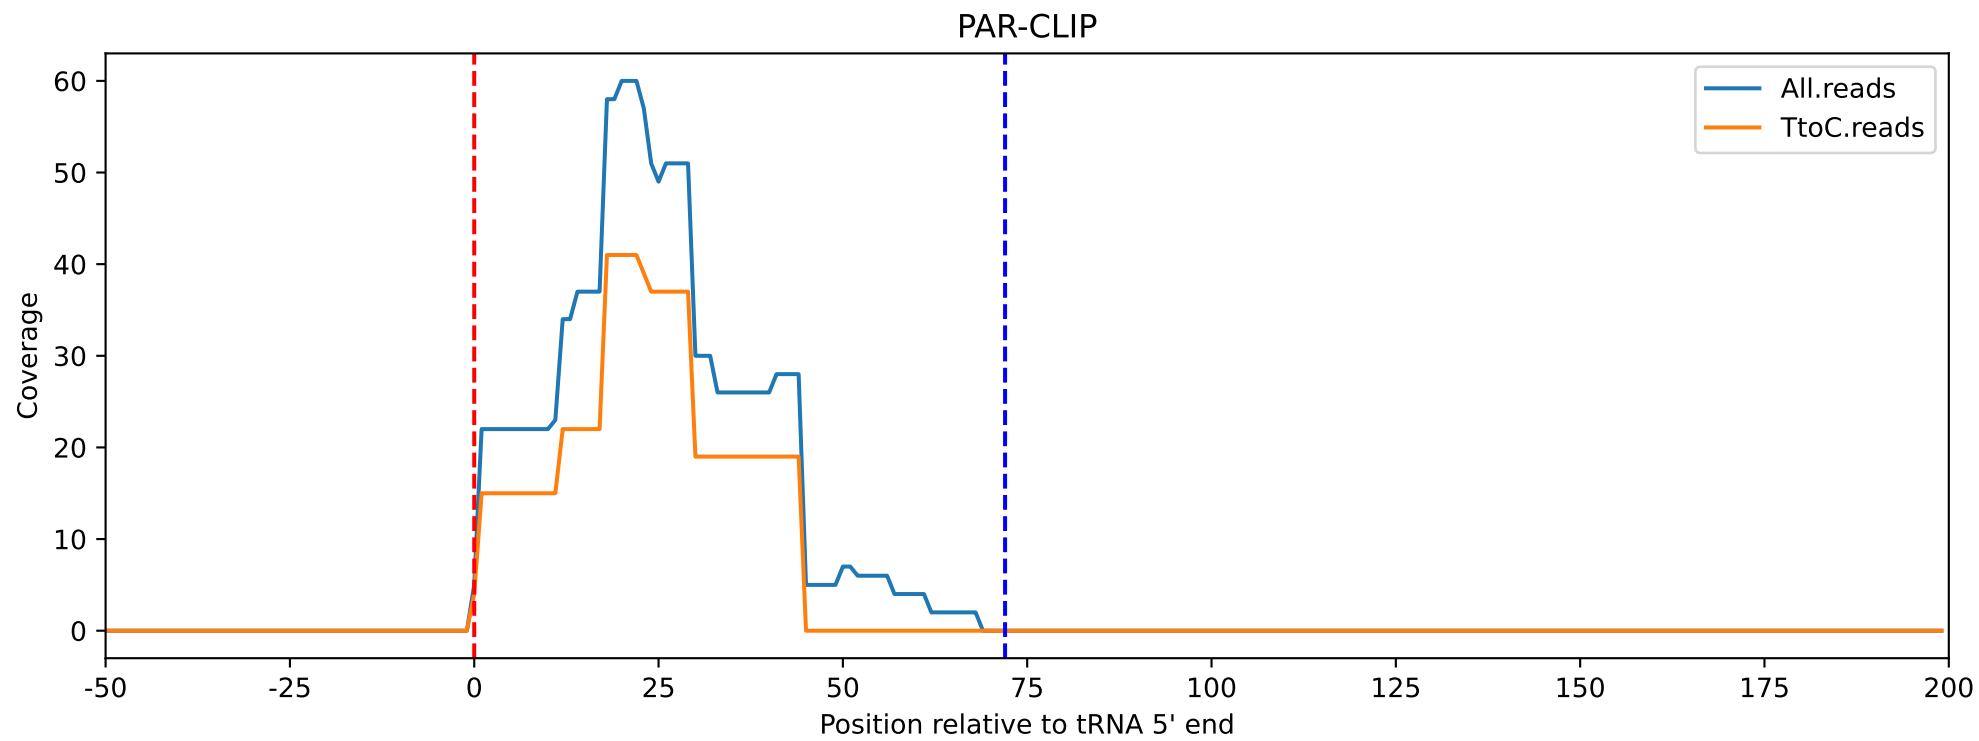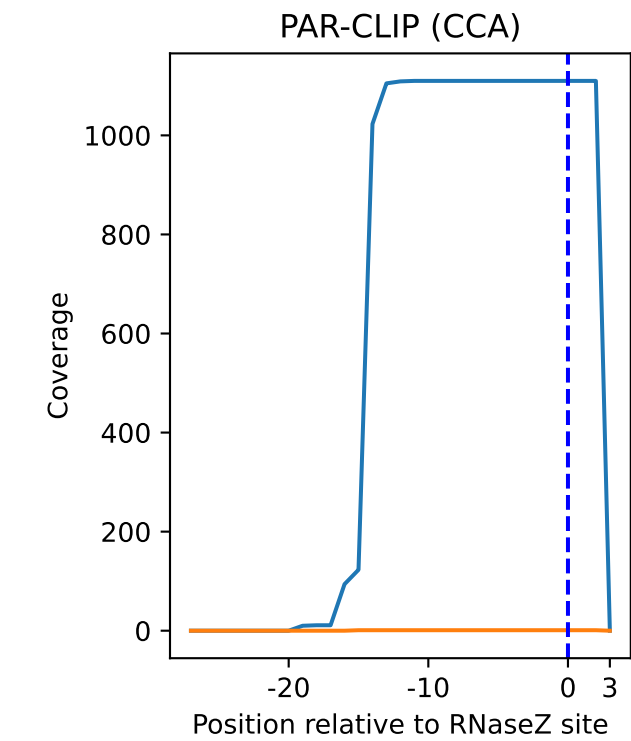

# tRNA-Lys-CTT-1-7

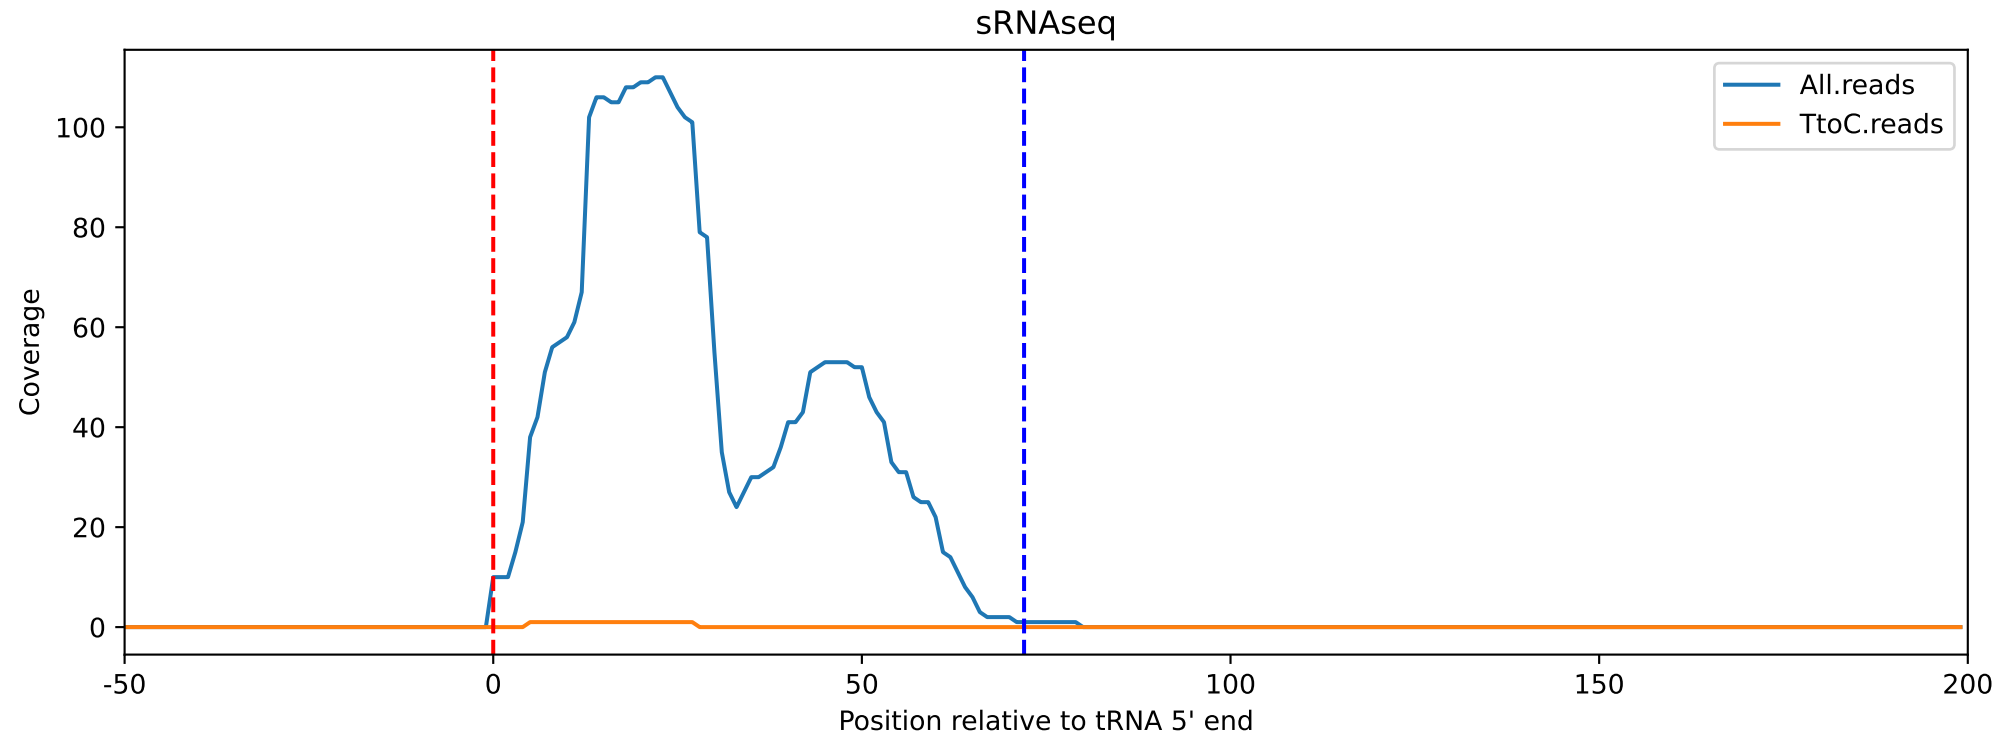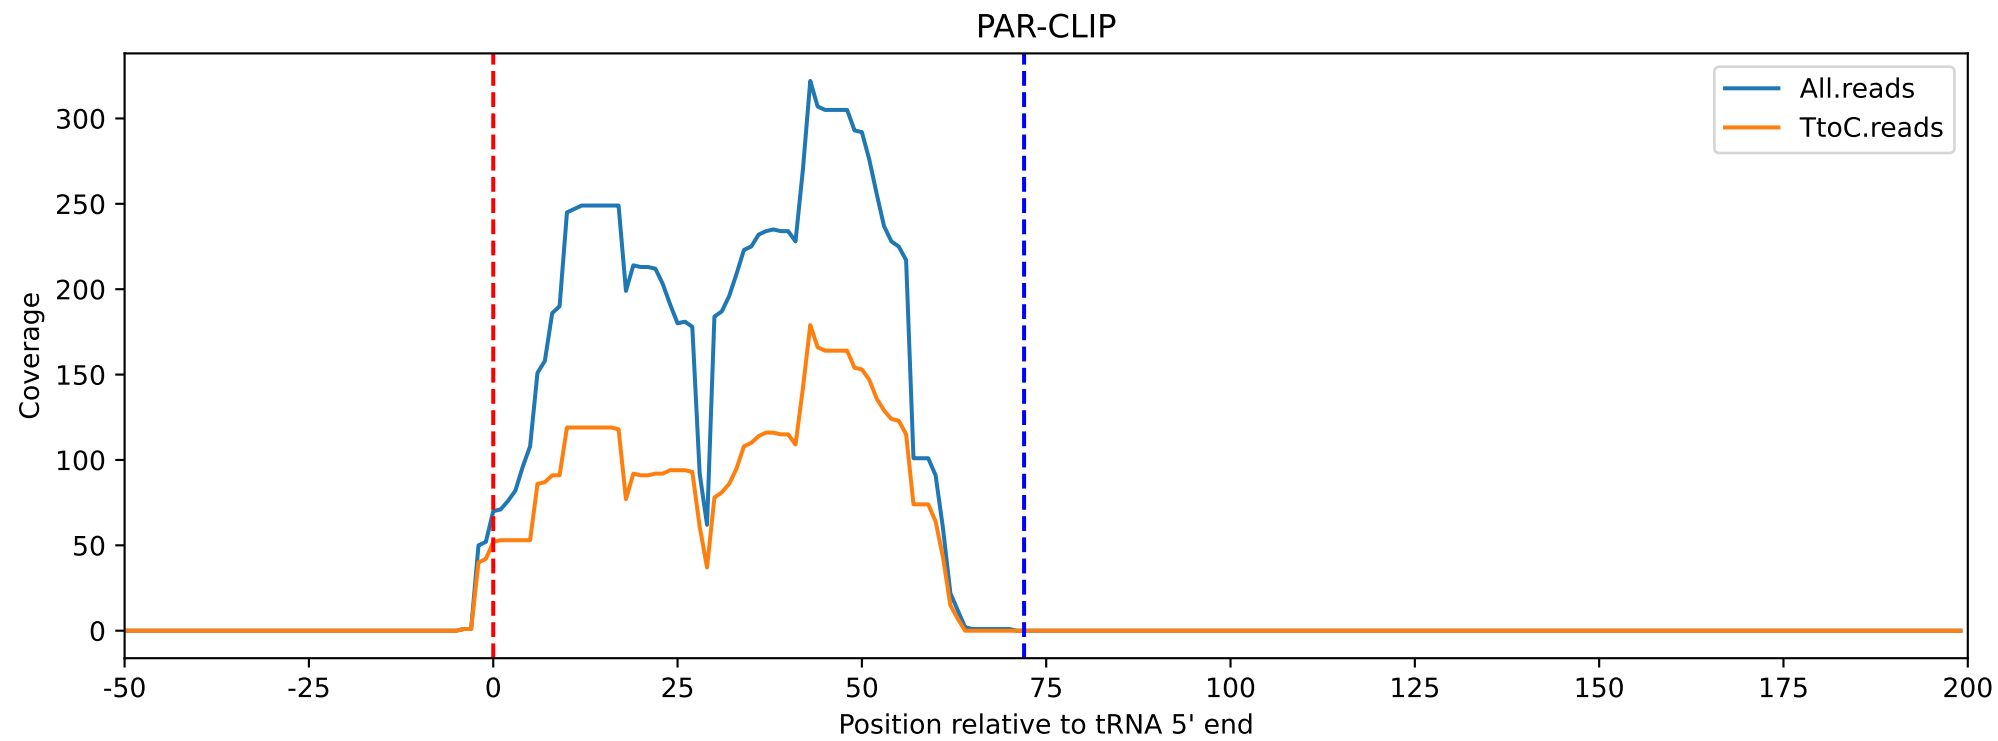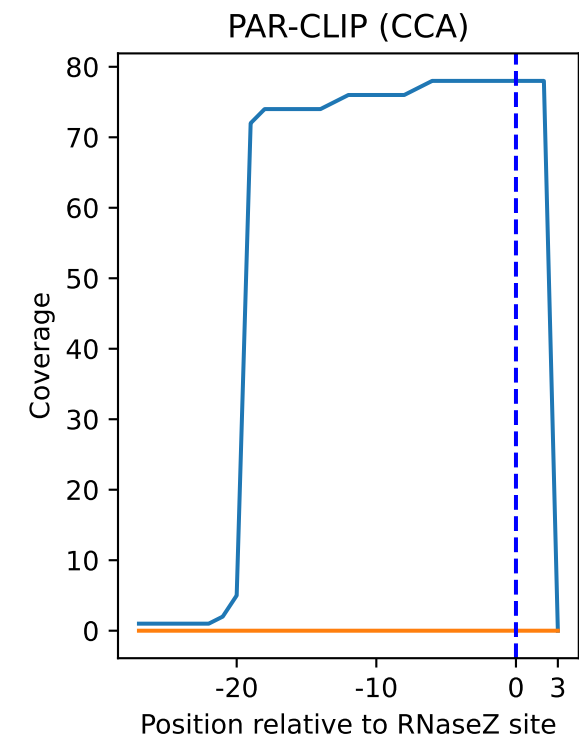

# tRNA-Thr-AGT-2-1

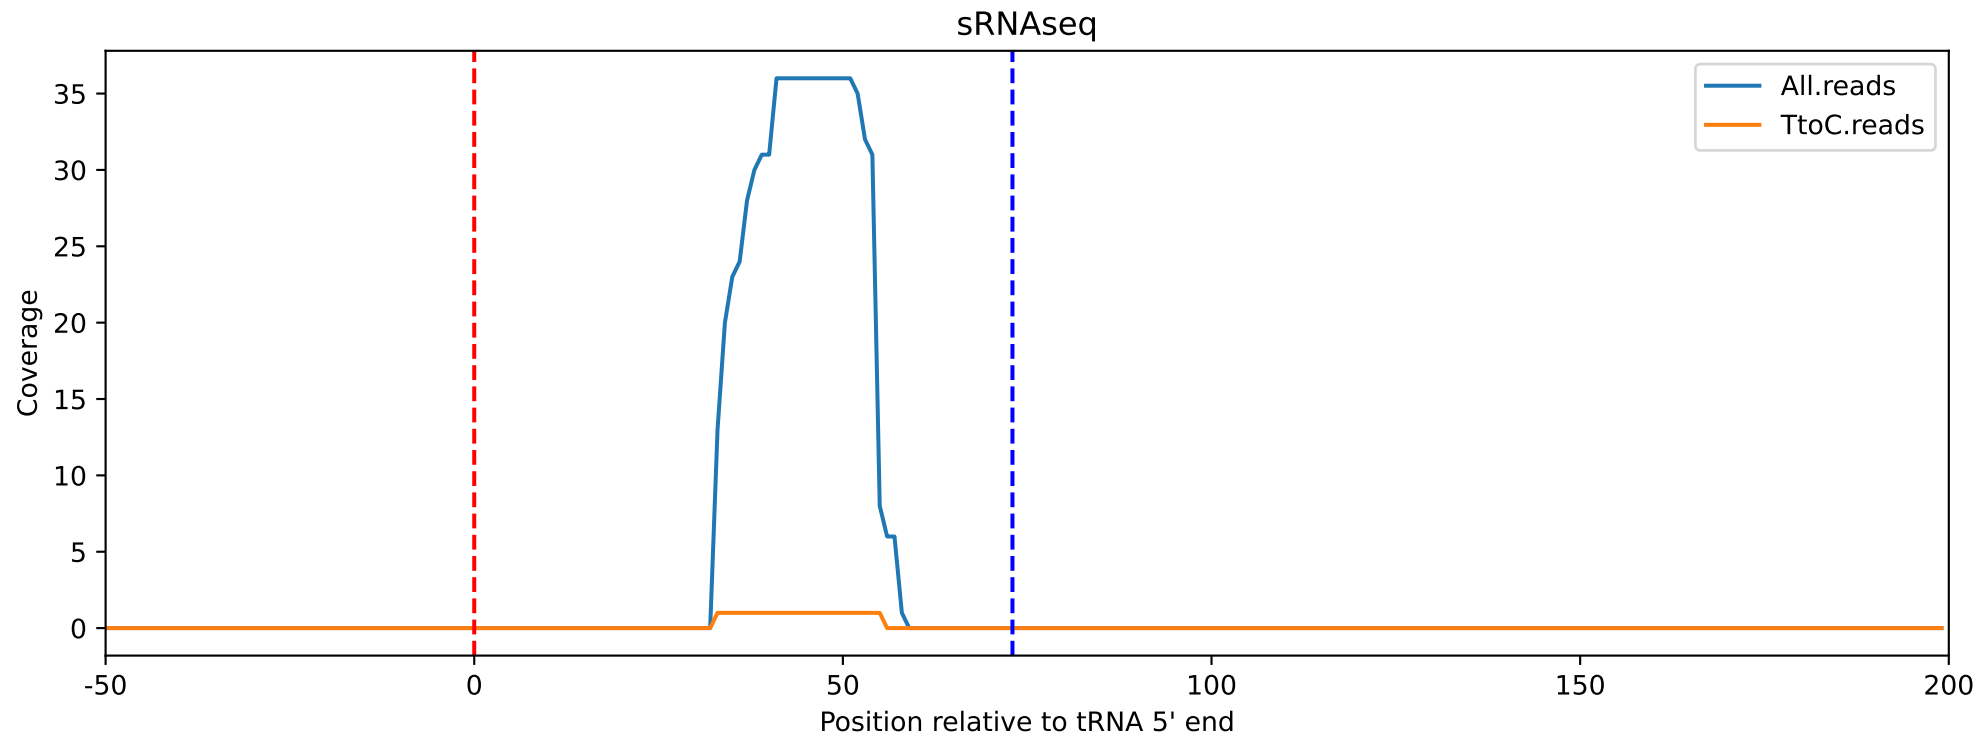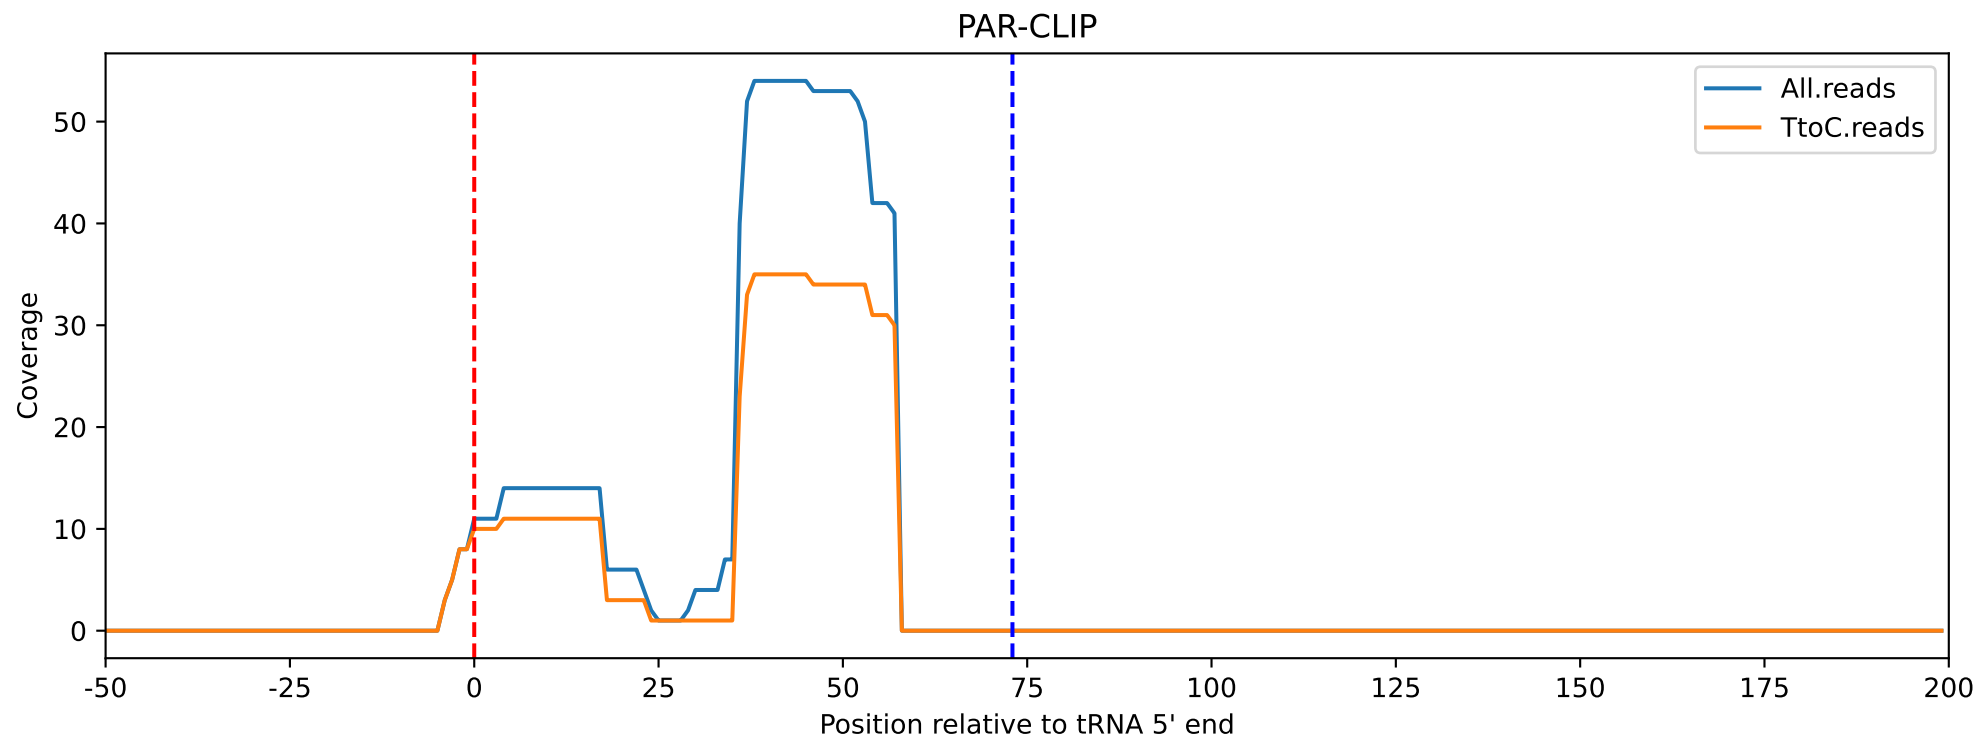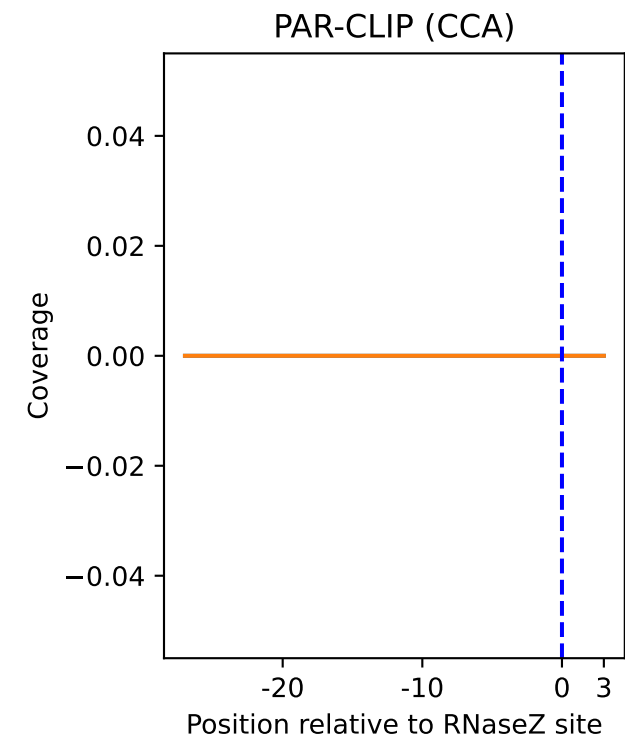

# tRNA-Thr-TGT-2-1

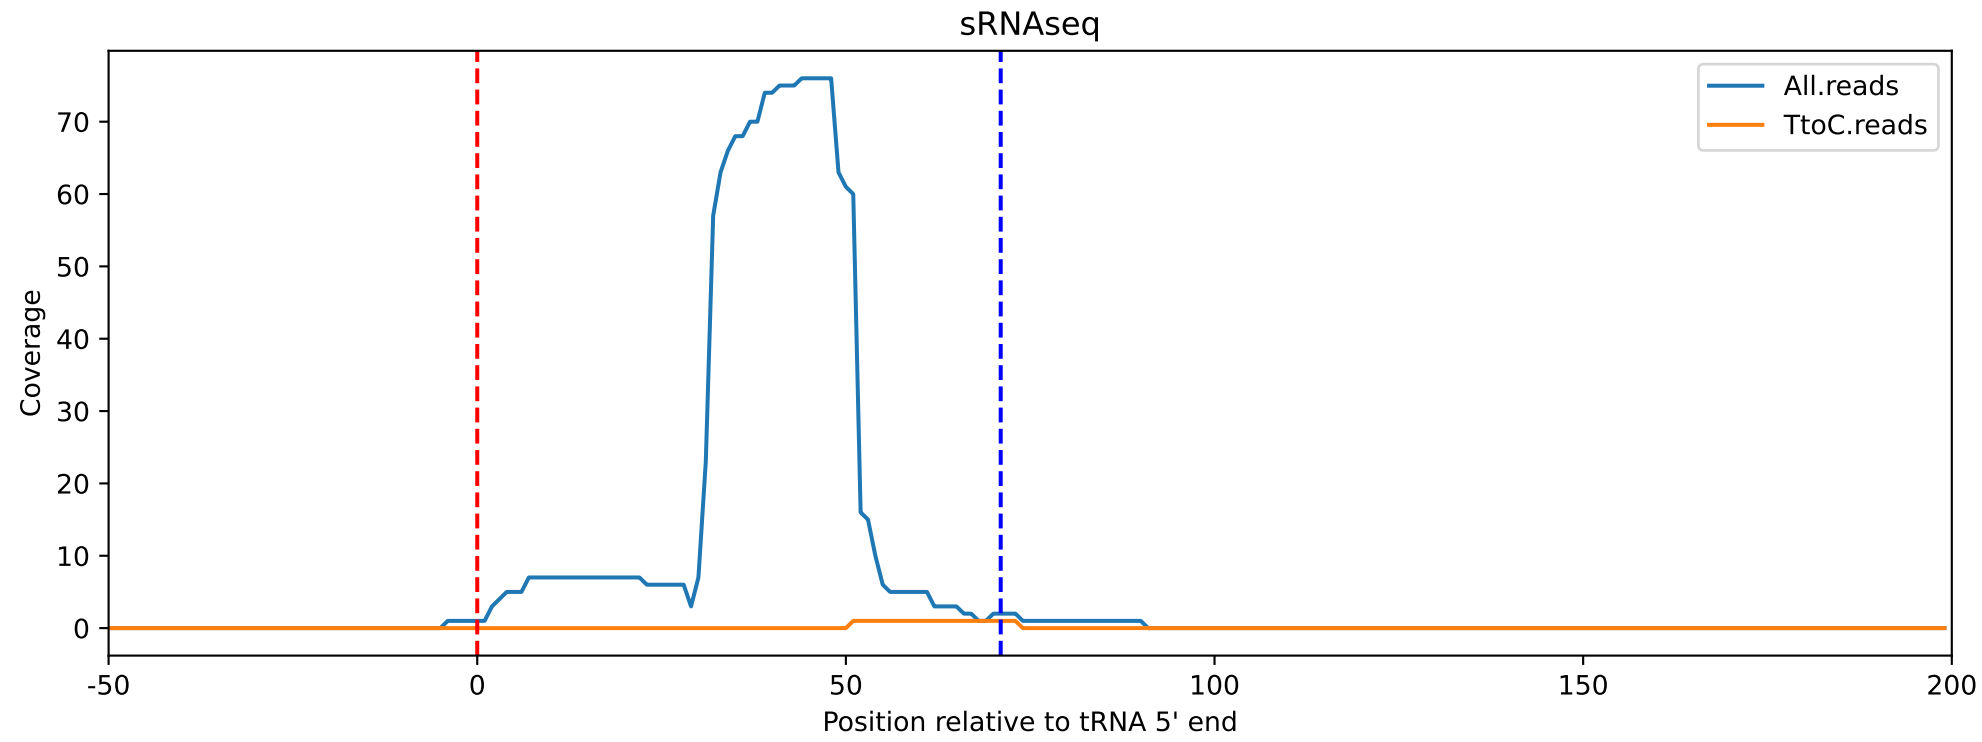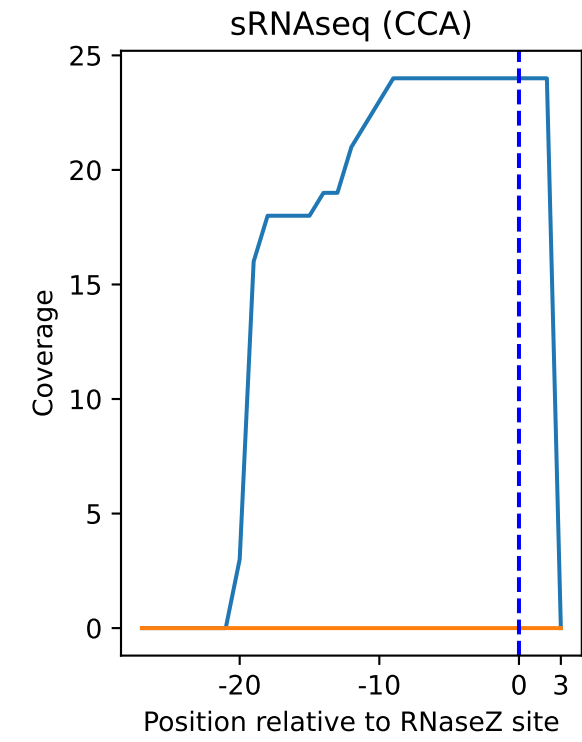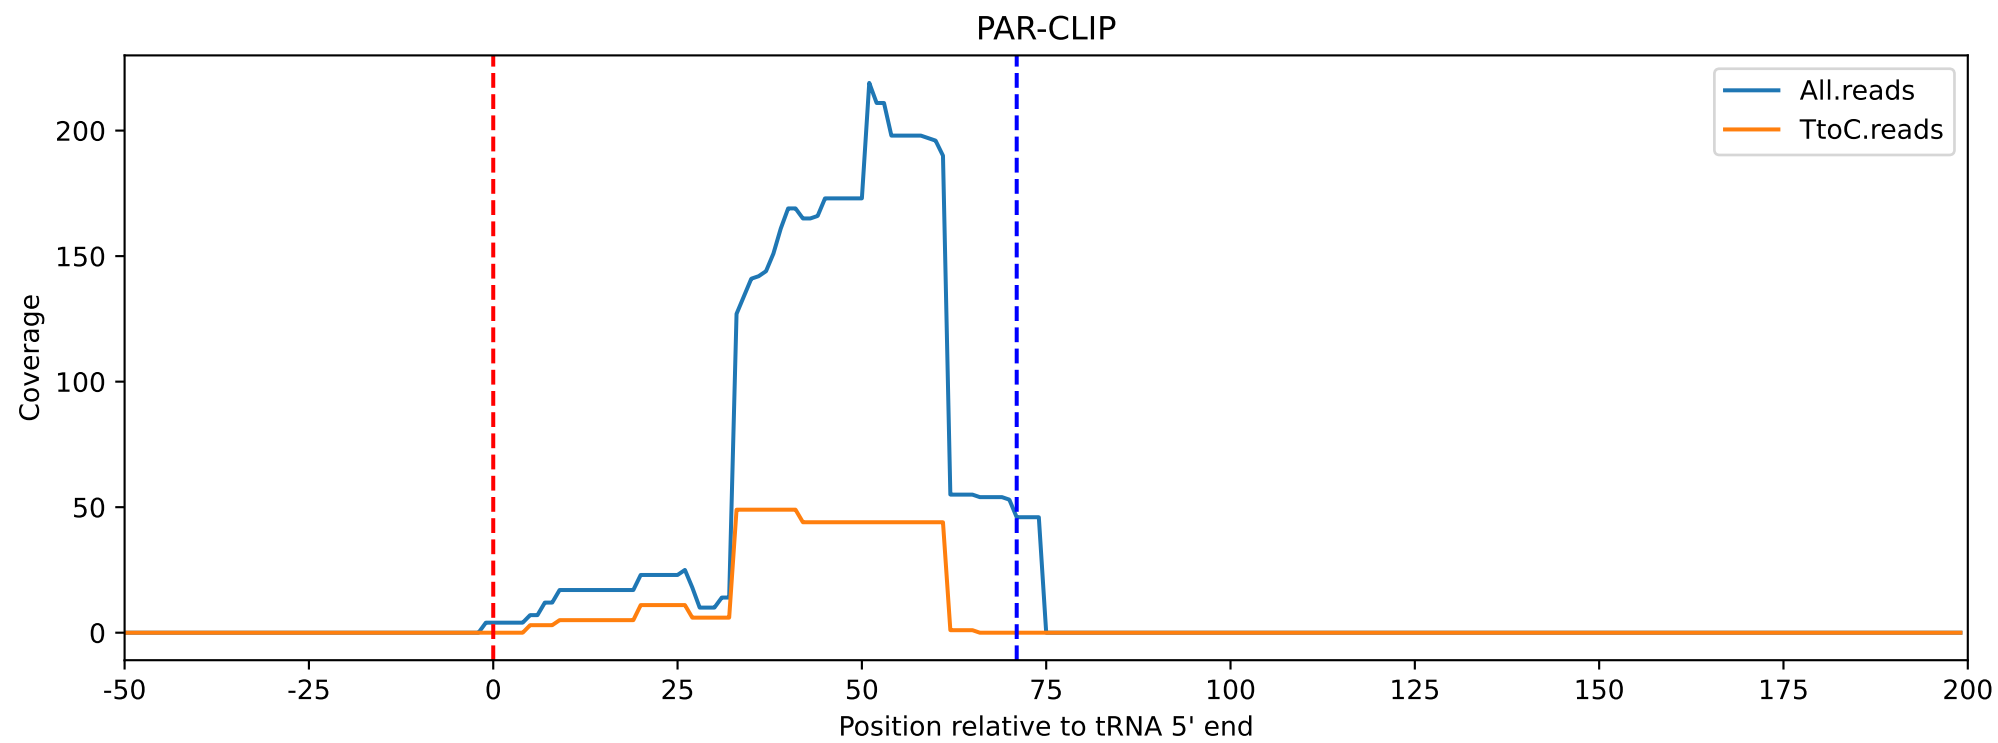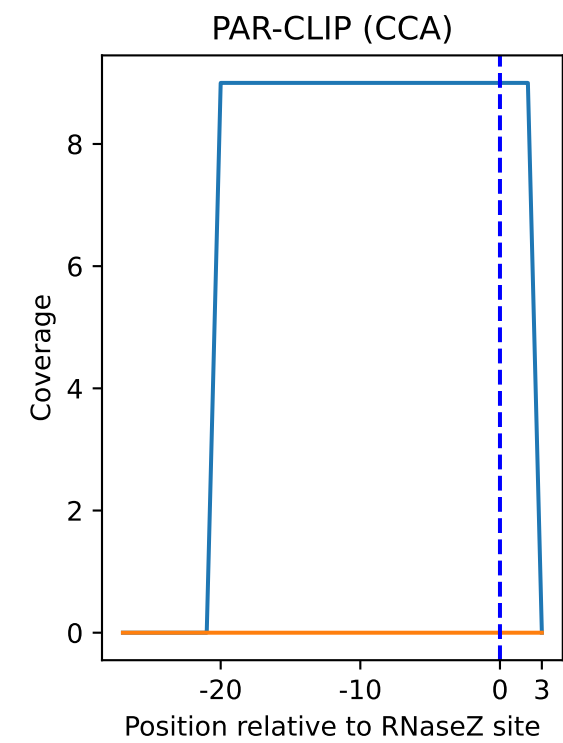

# tRNA-Val-AAC-2-3

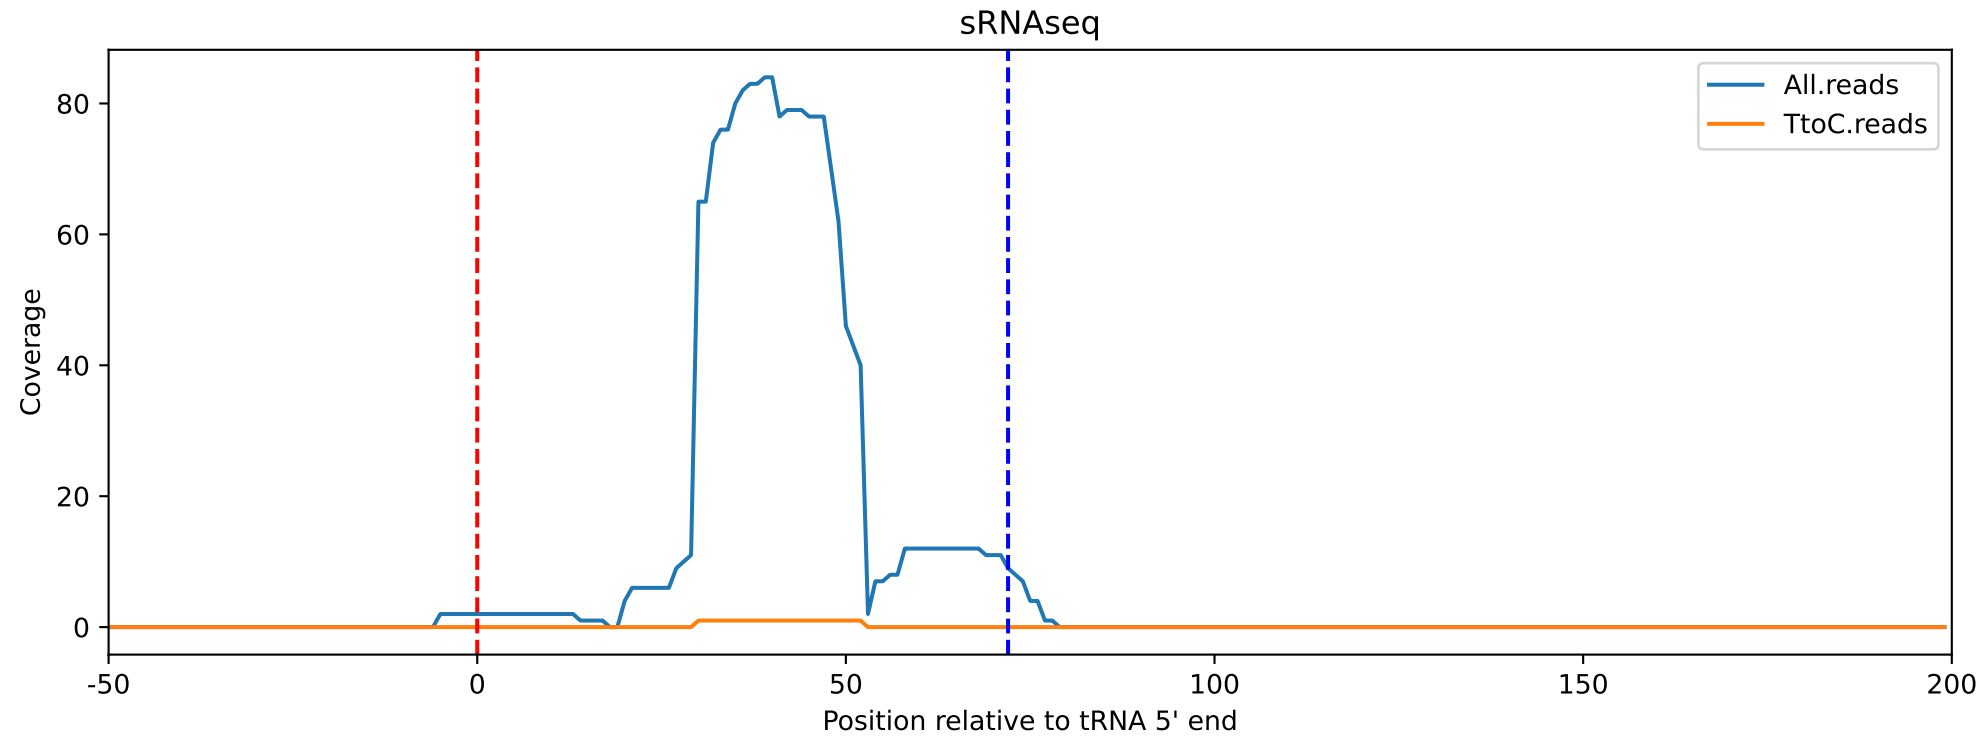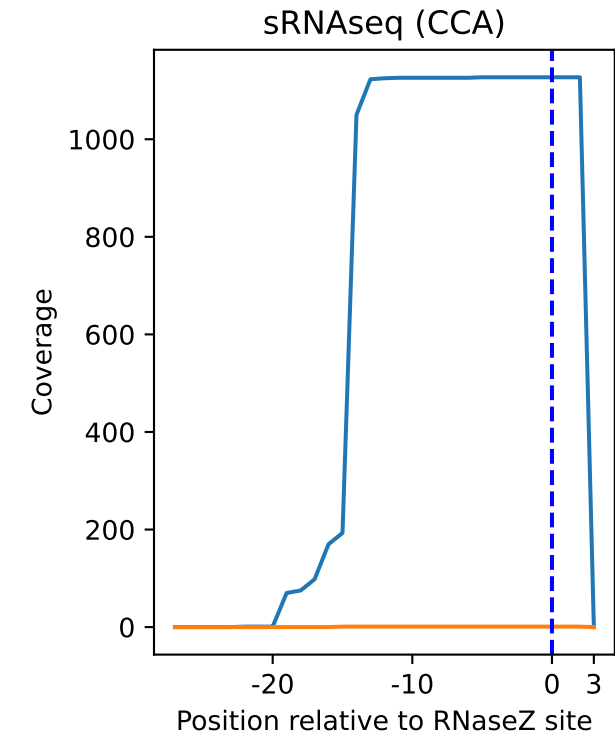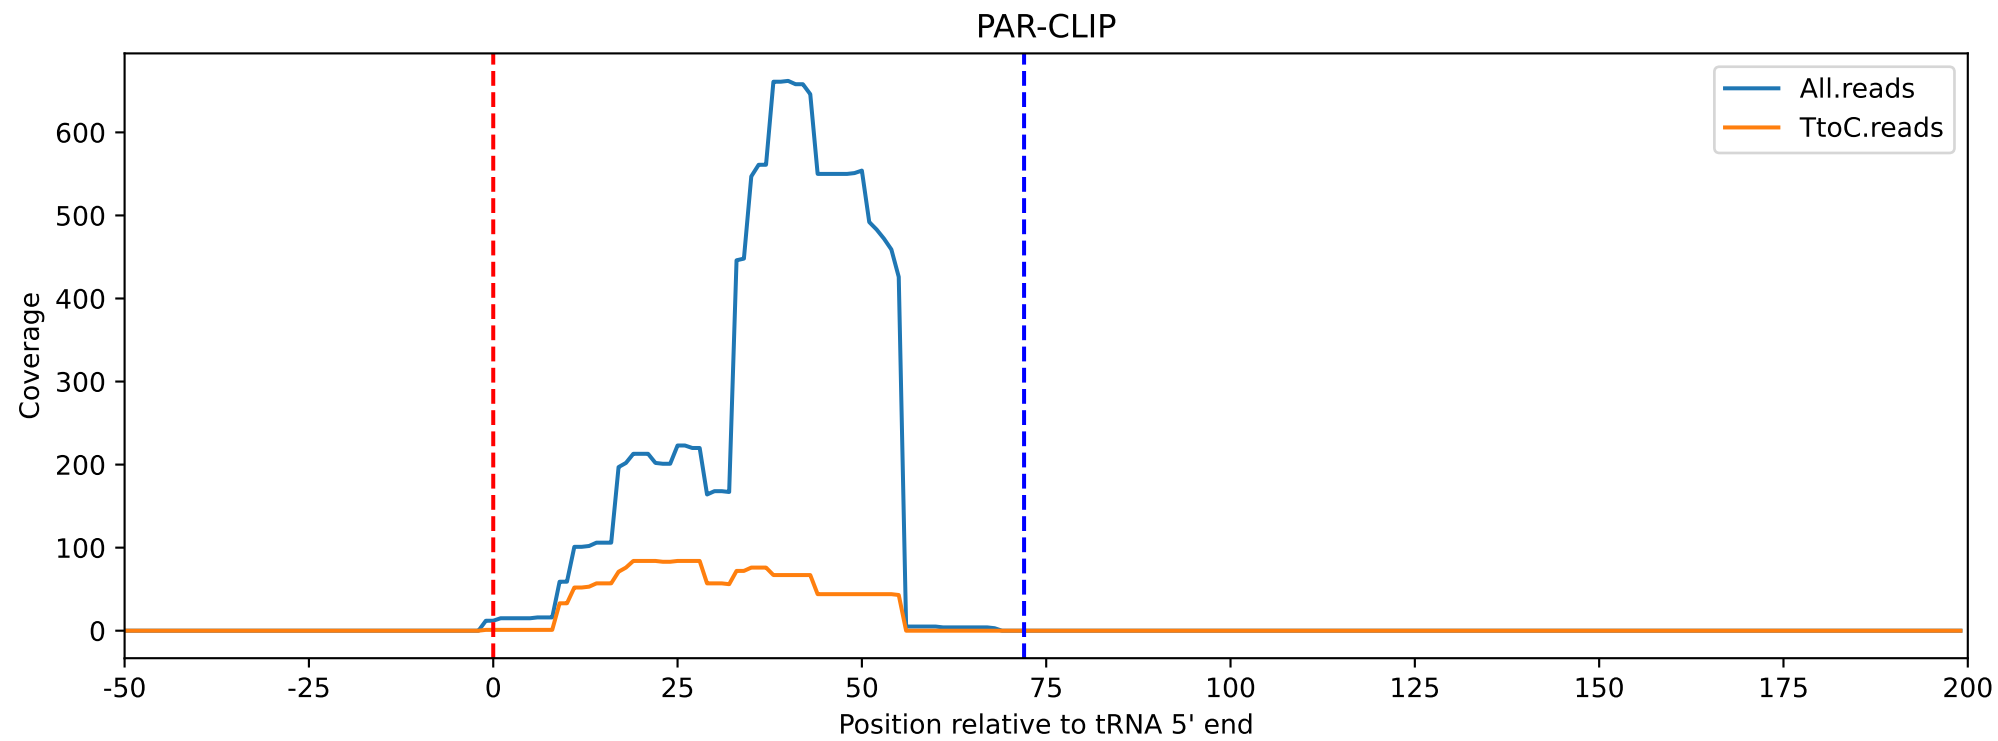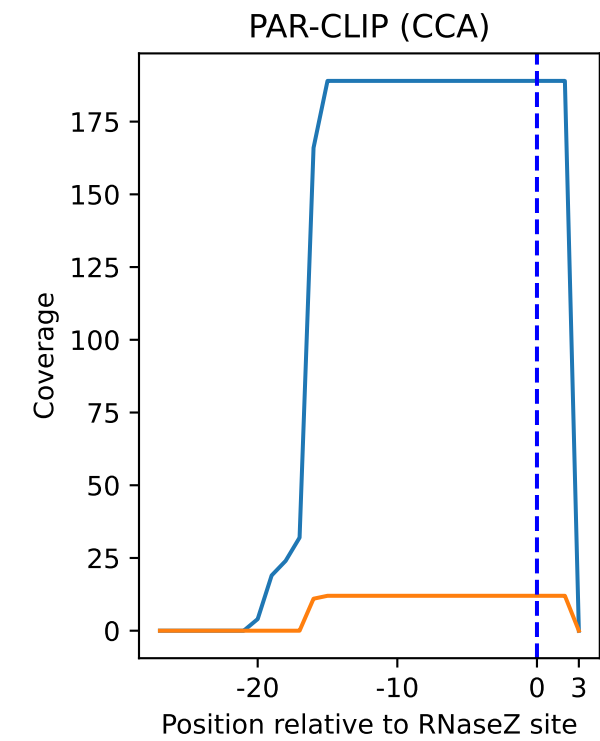

# tRNA-Trp-CCA-2-1

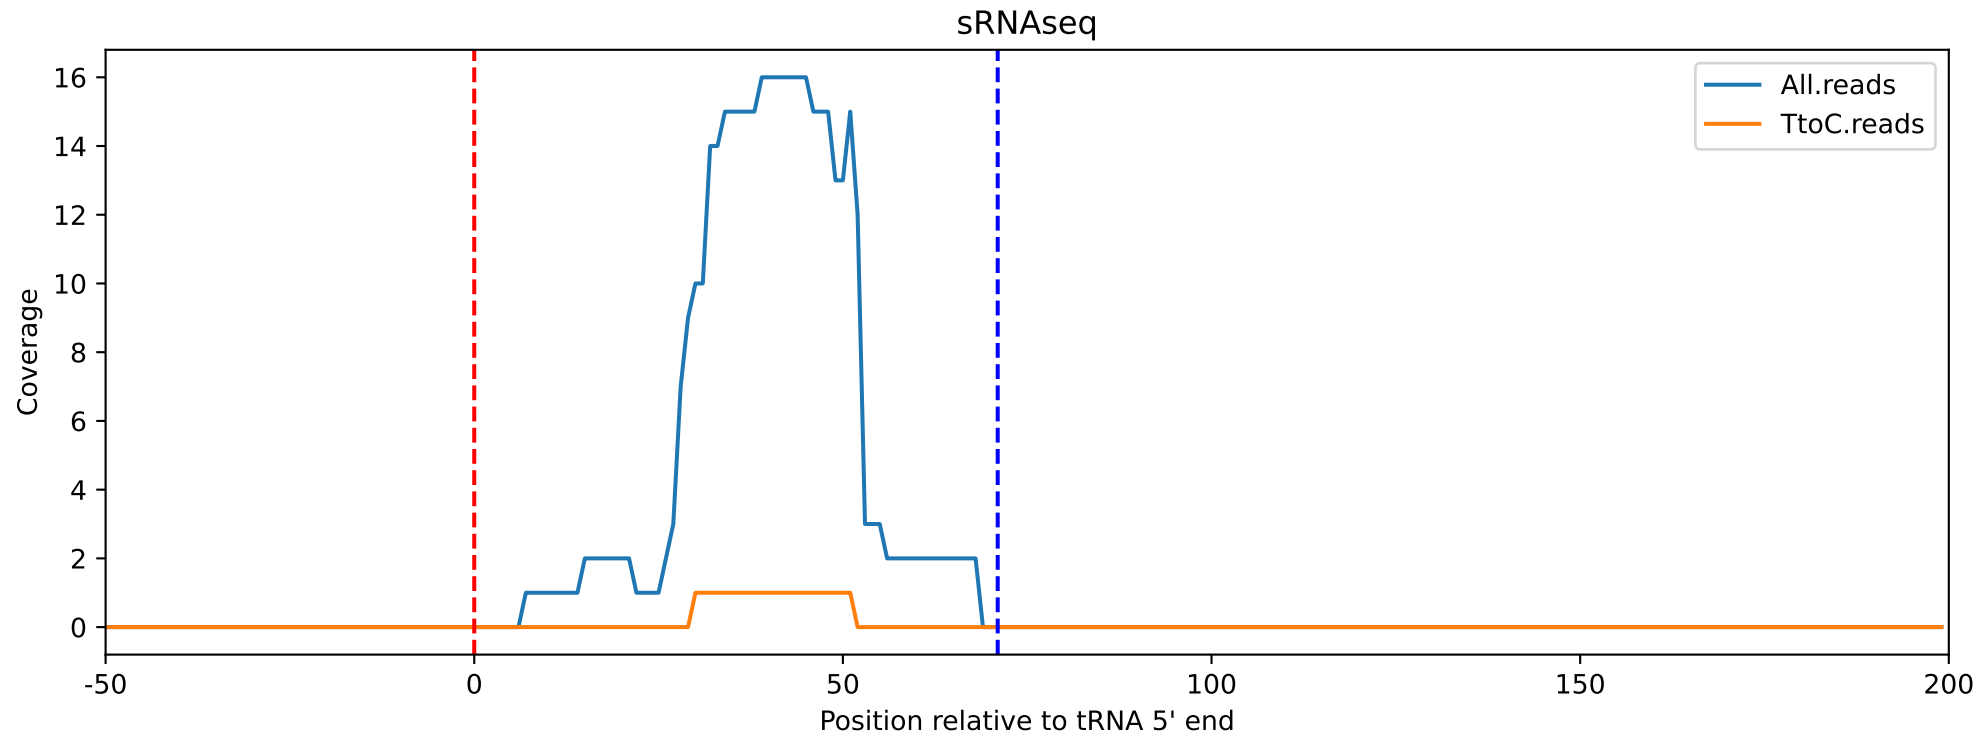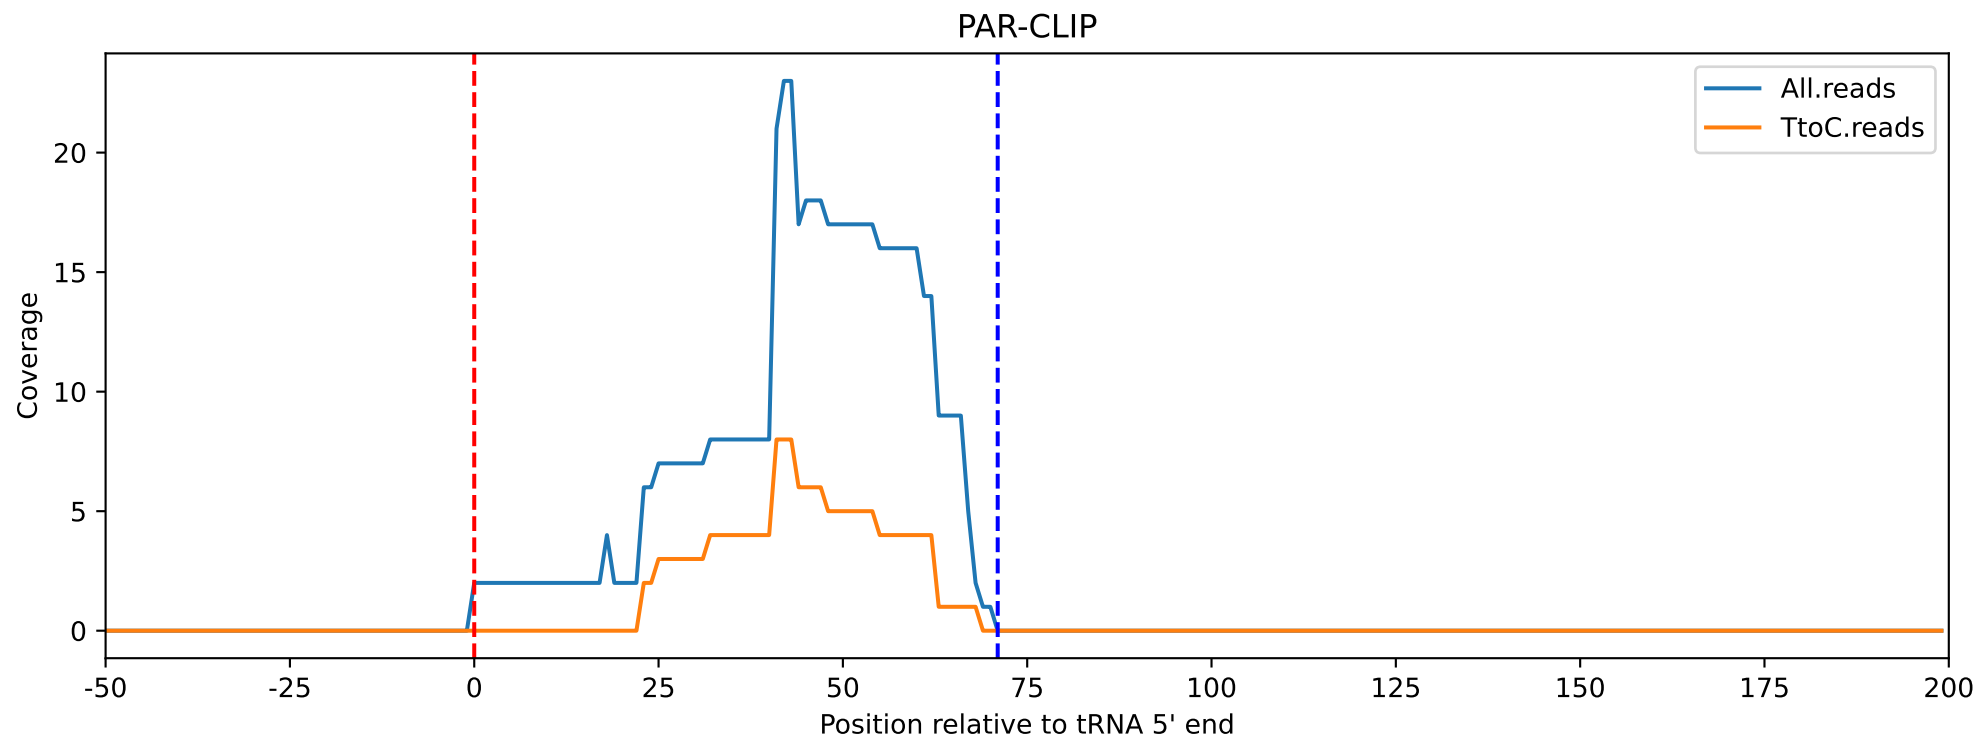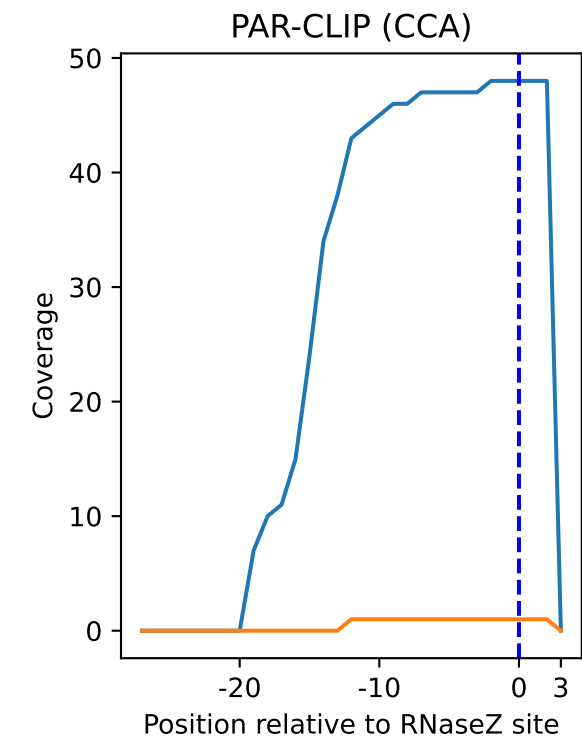

# tRNA-Glu-TTC-1-1

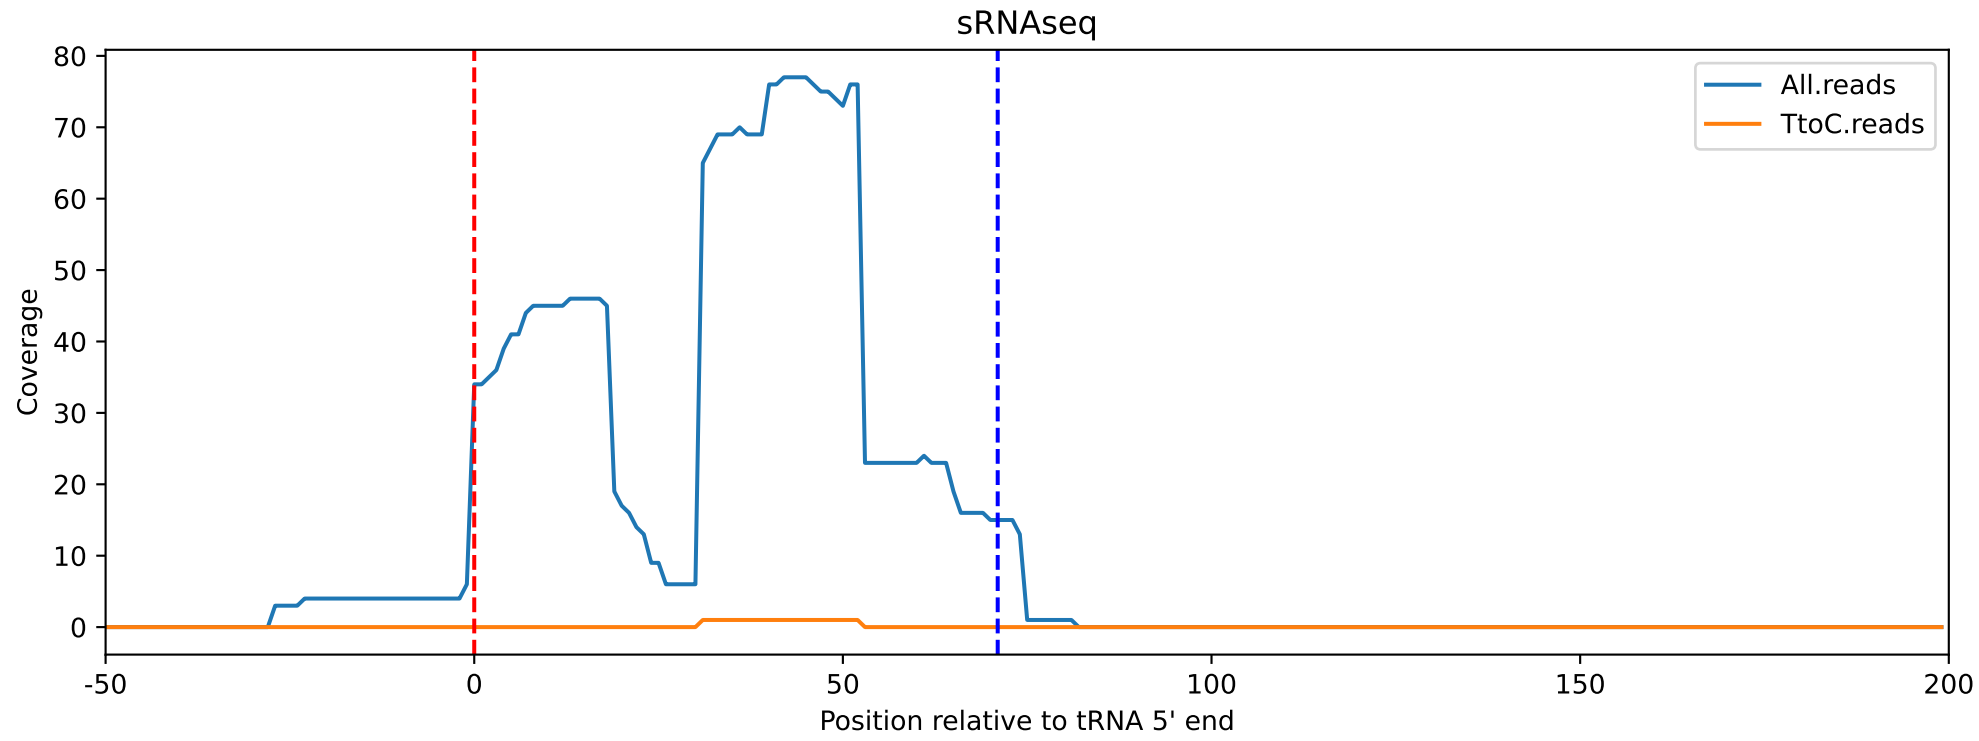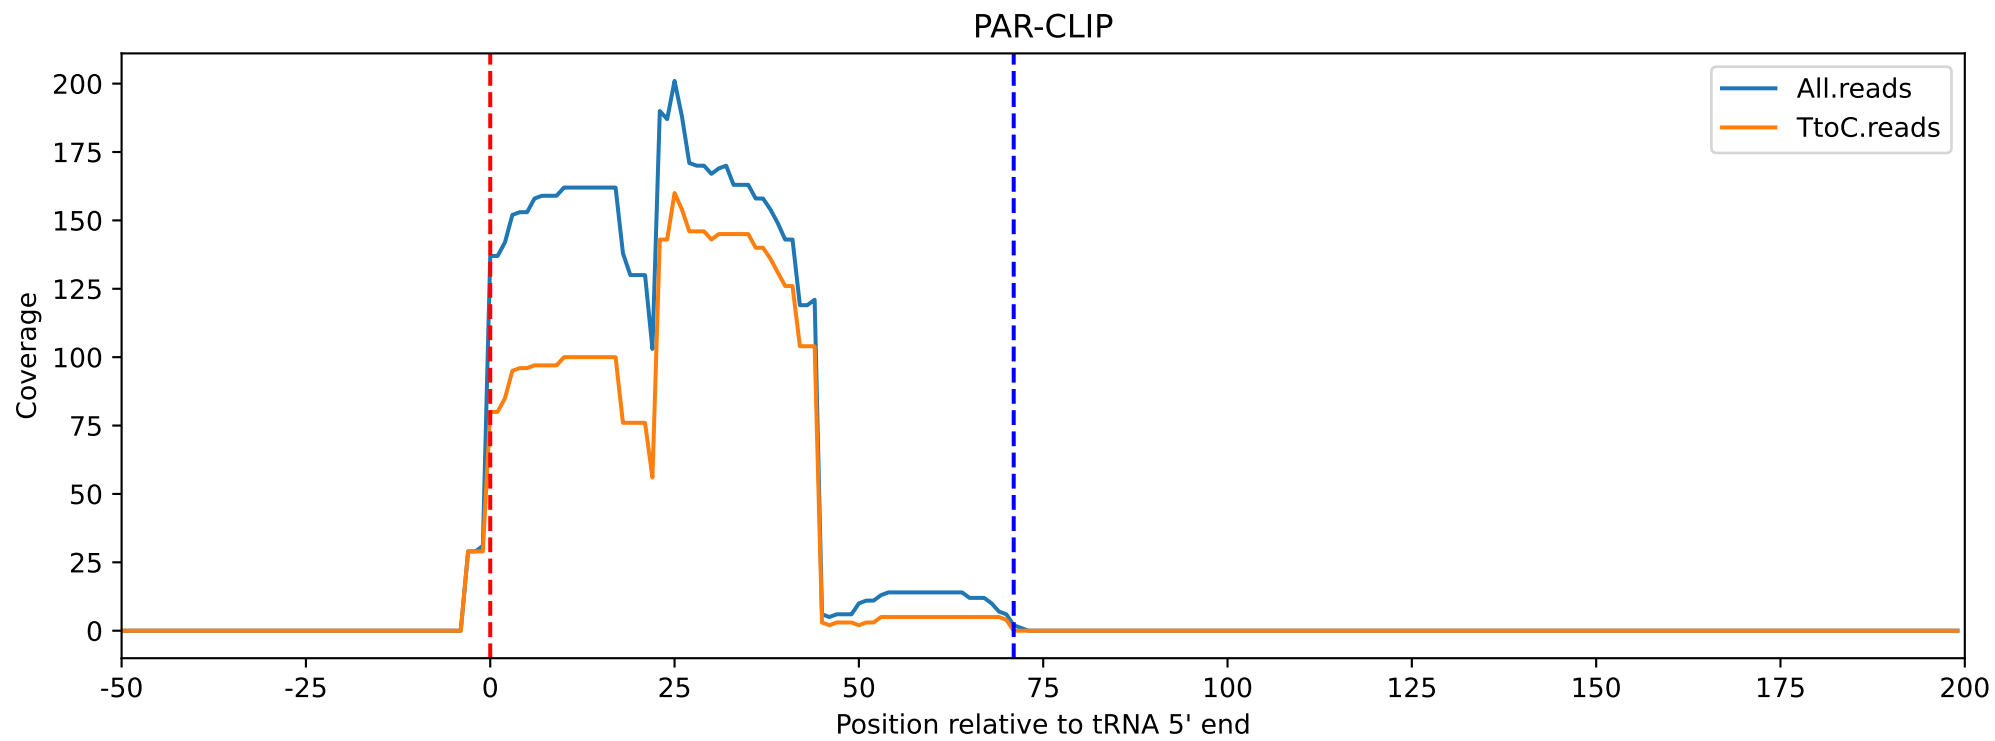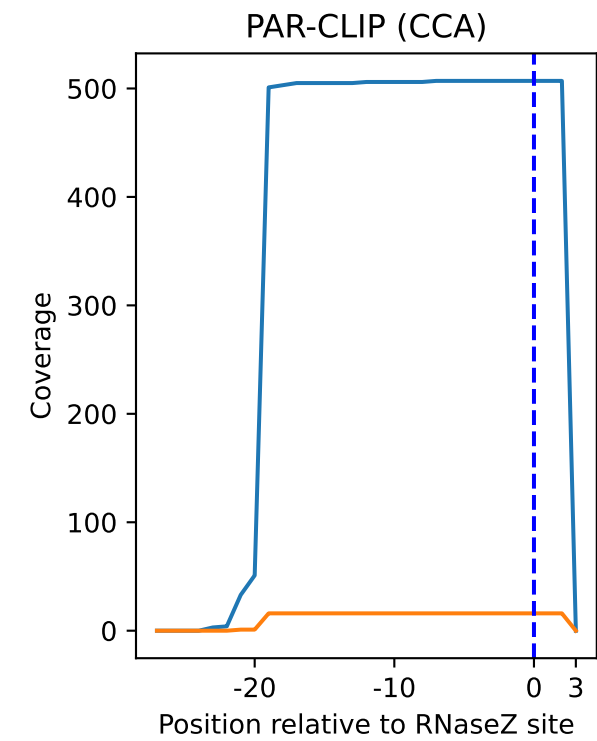



# tRNA-Trp-CCA-2-6

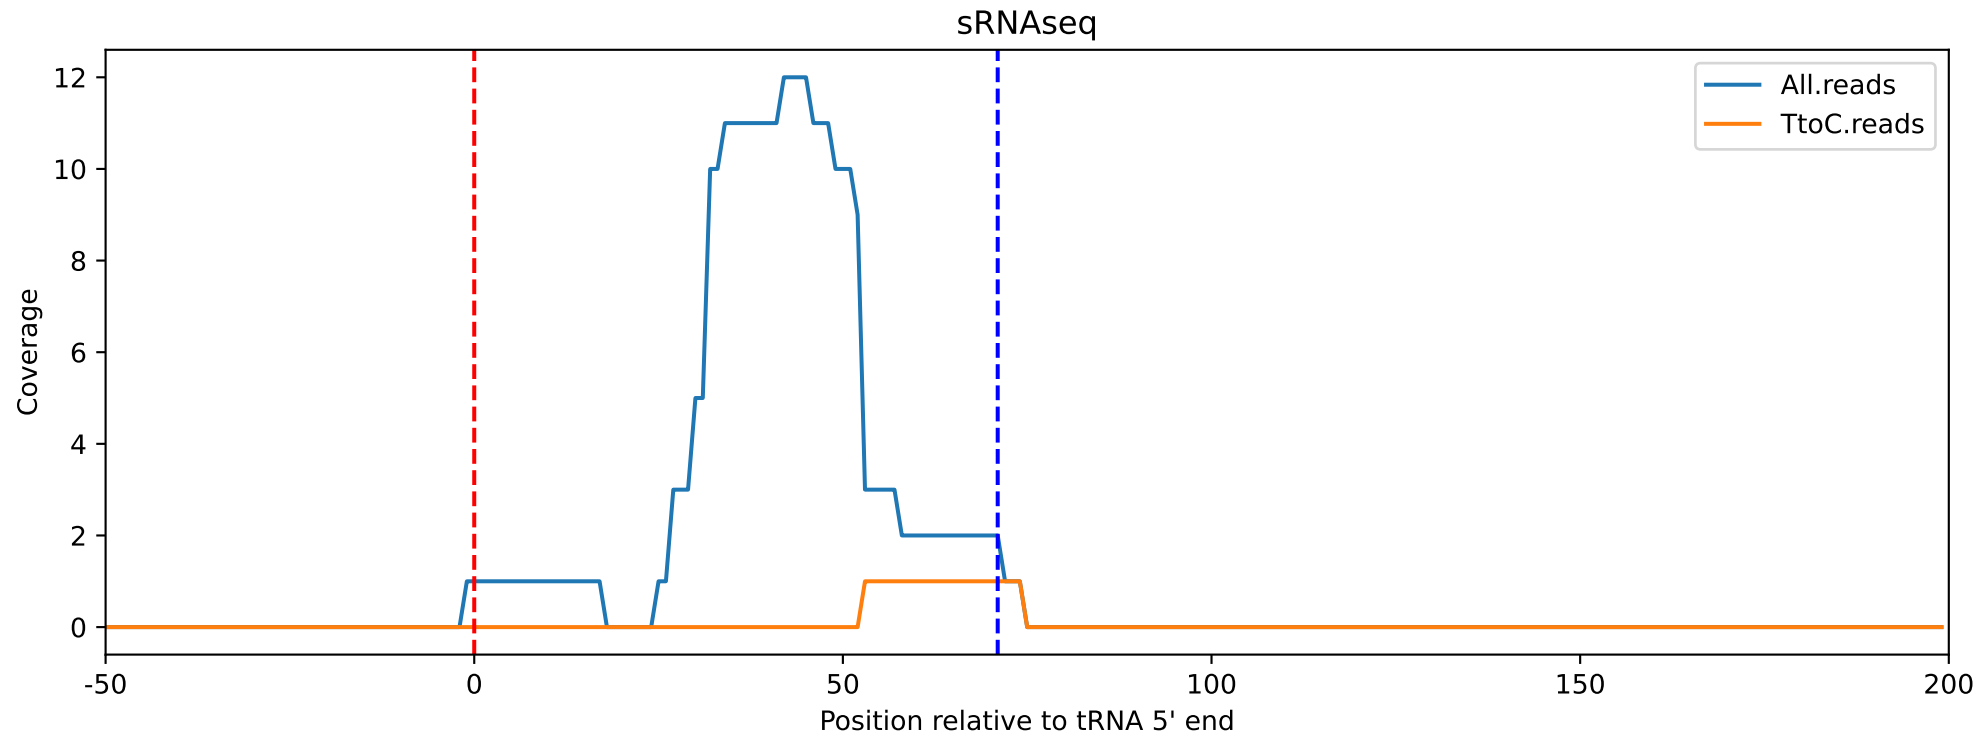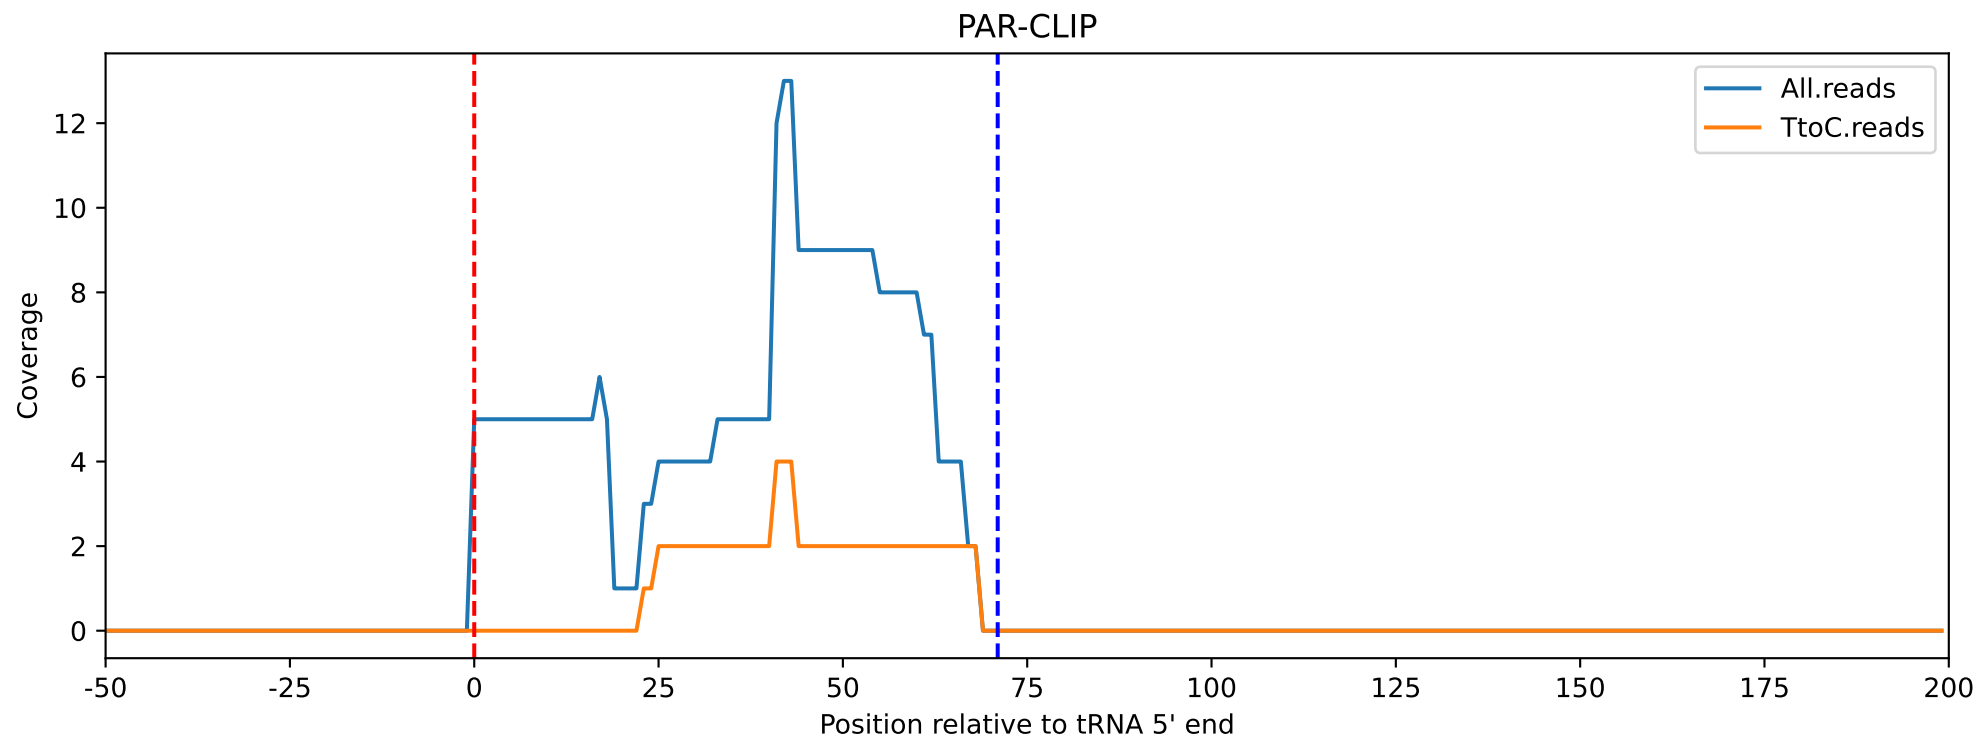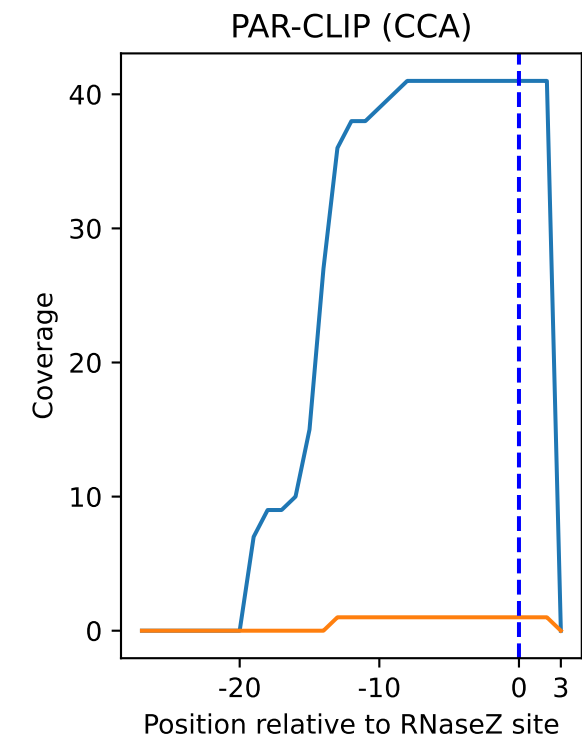

# tRNA-Asp-GTC-1-10

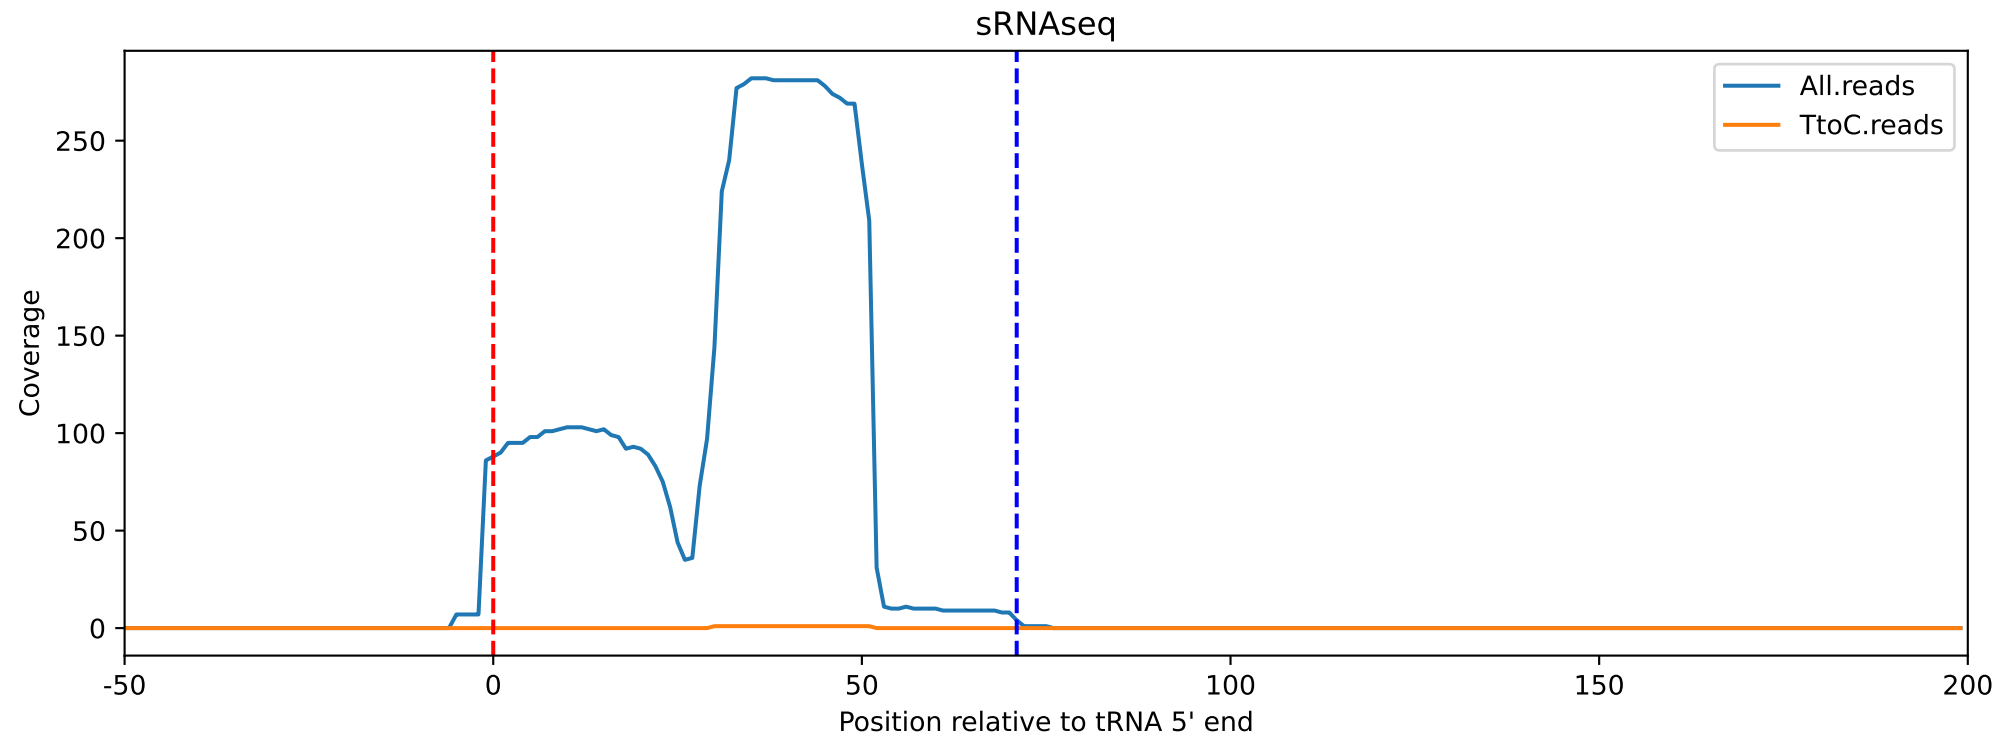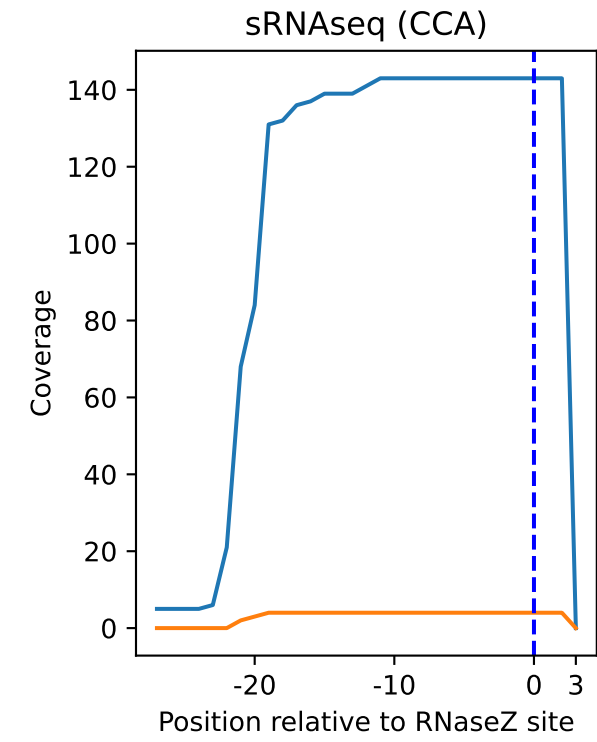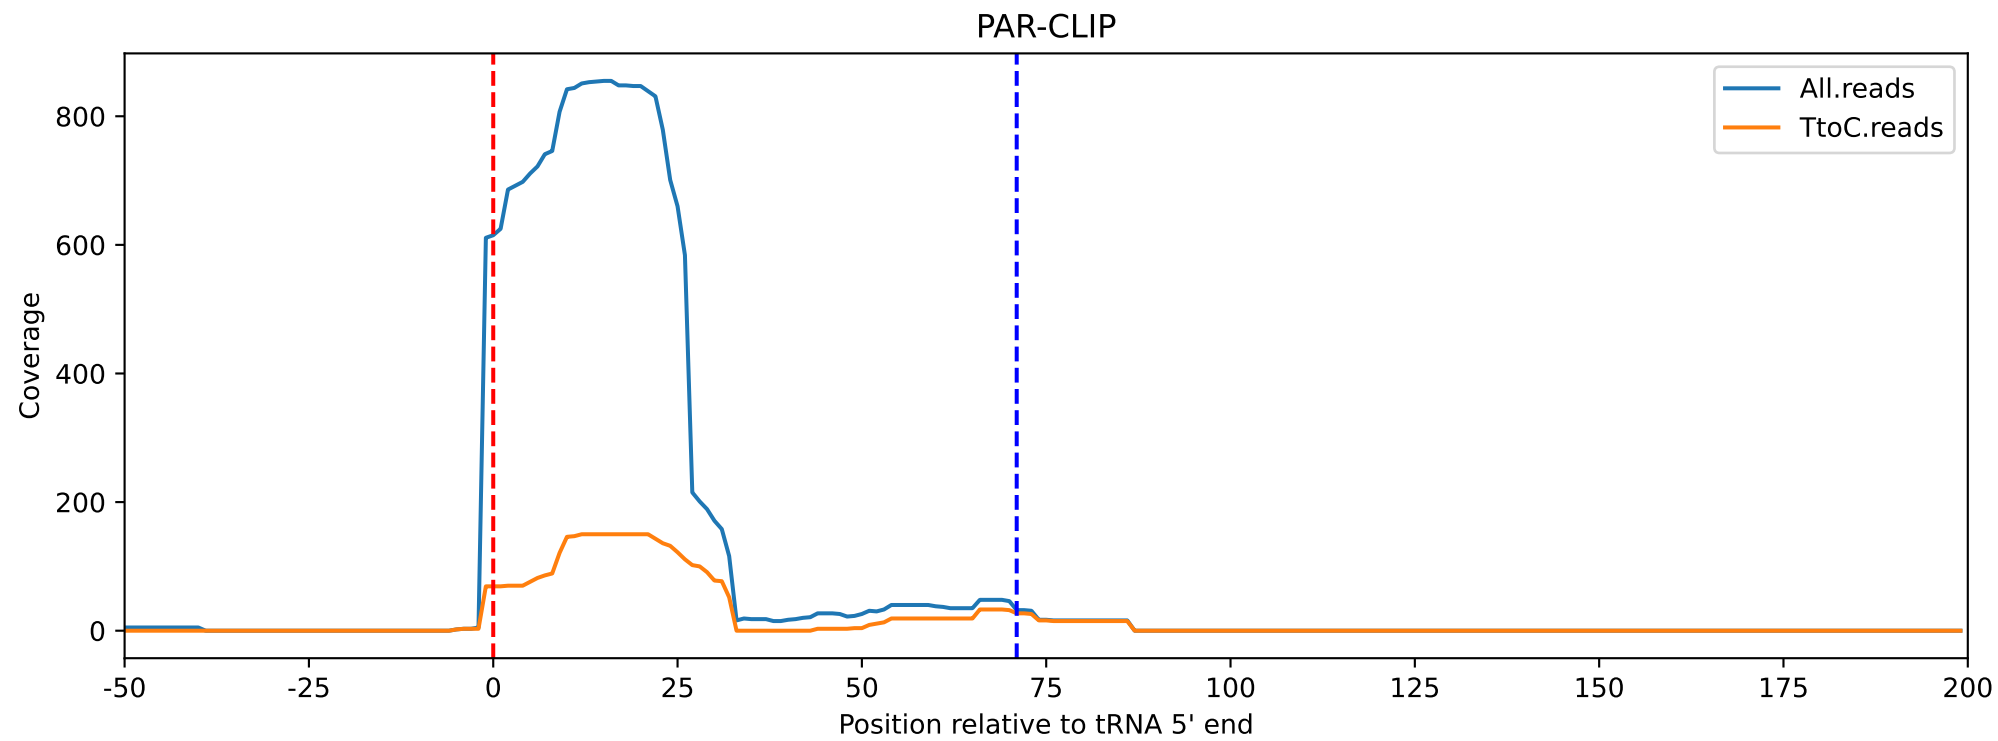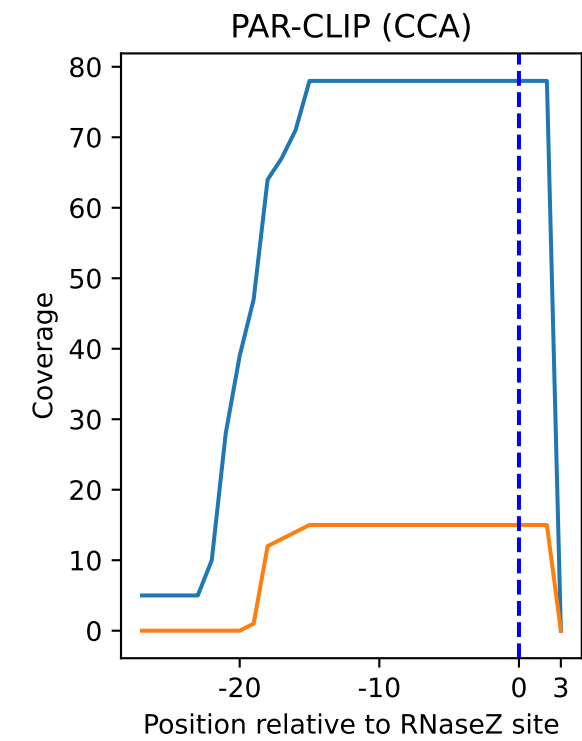

# tRNA-Val-CAC-2-4

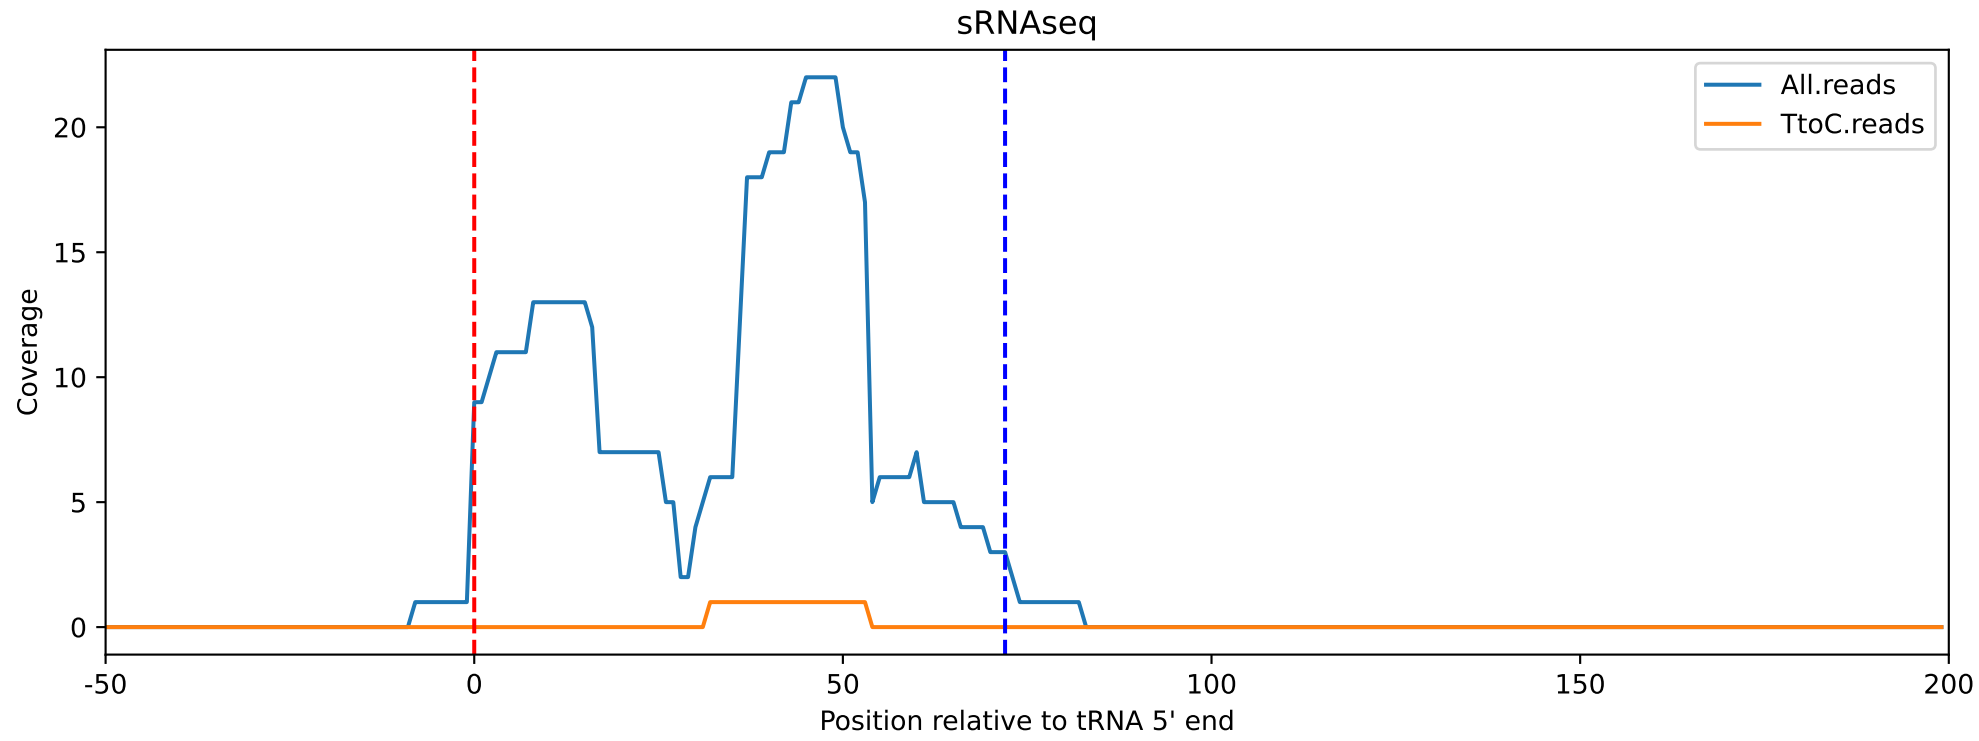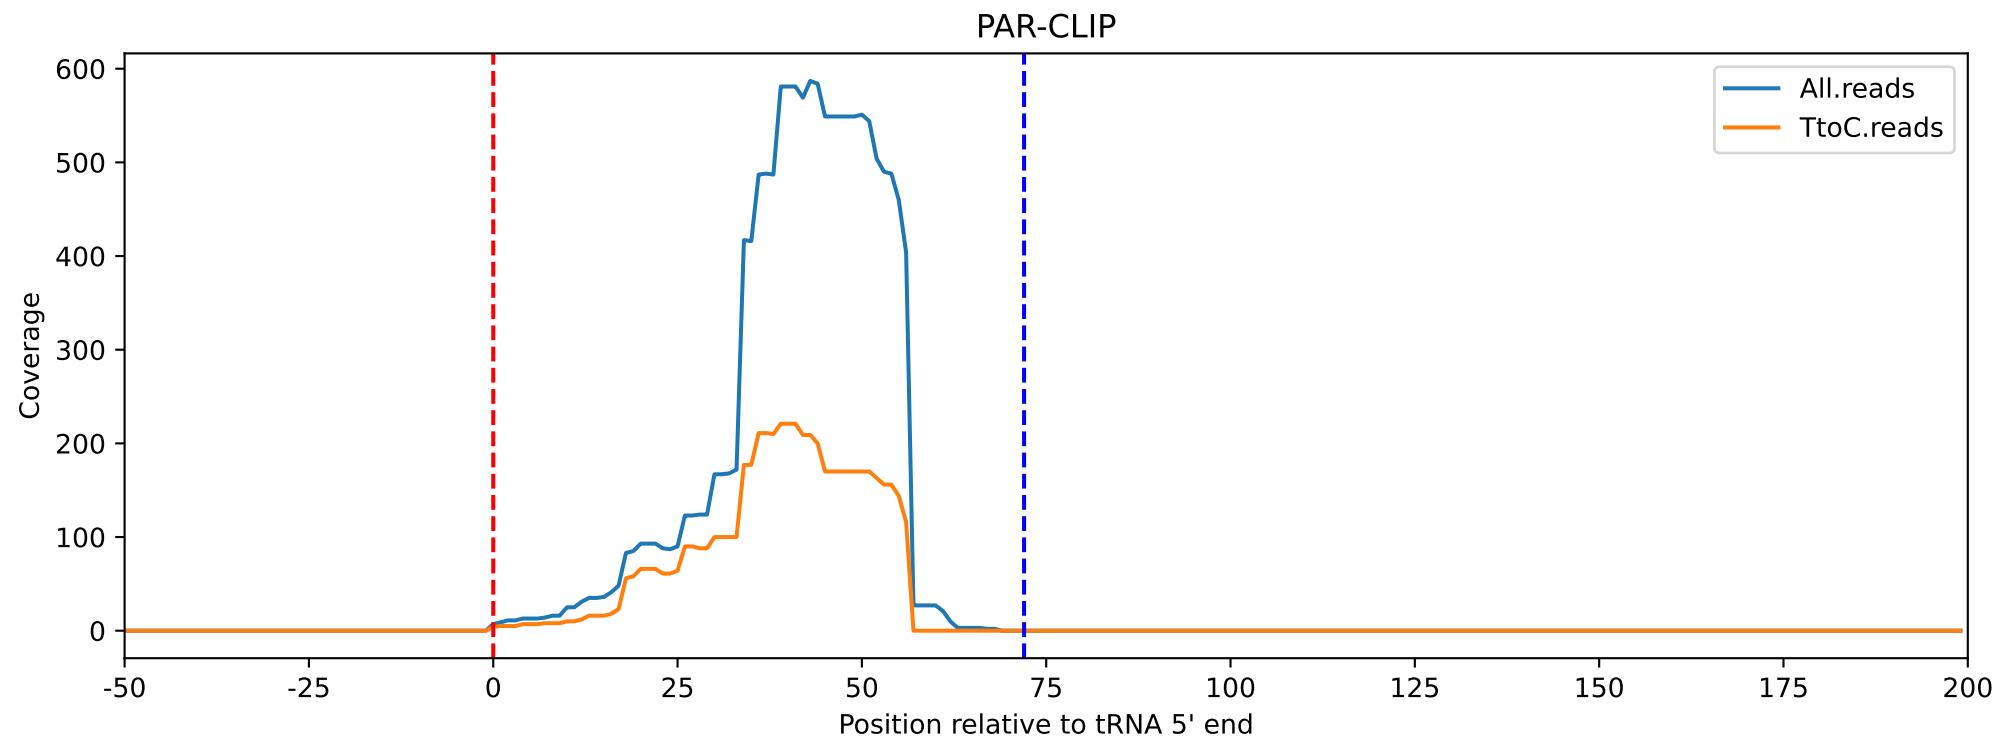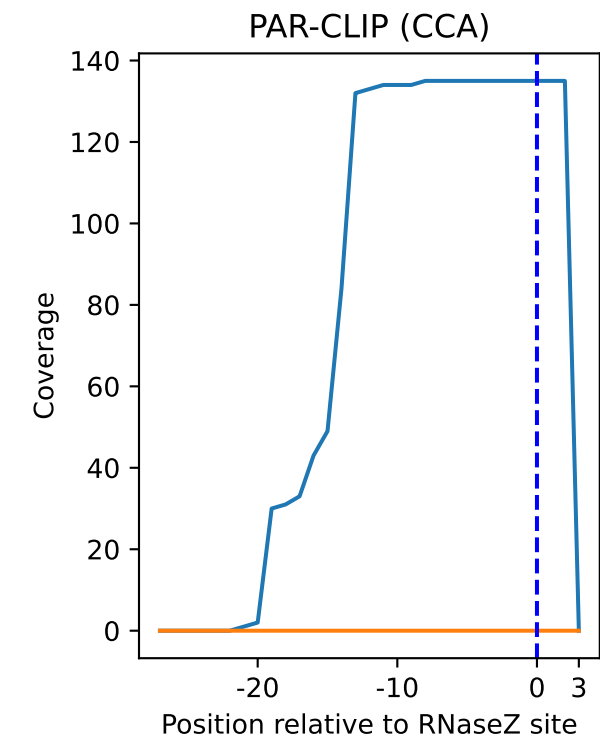

# tRNA-Val-CAC-2-6

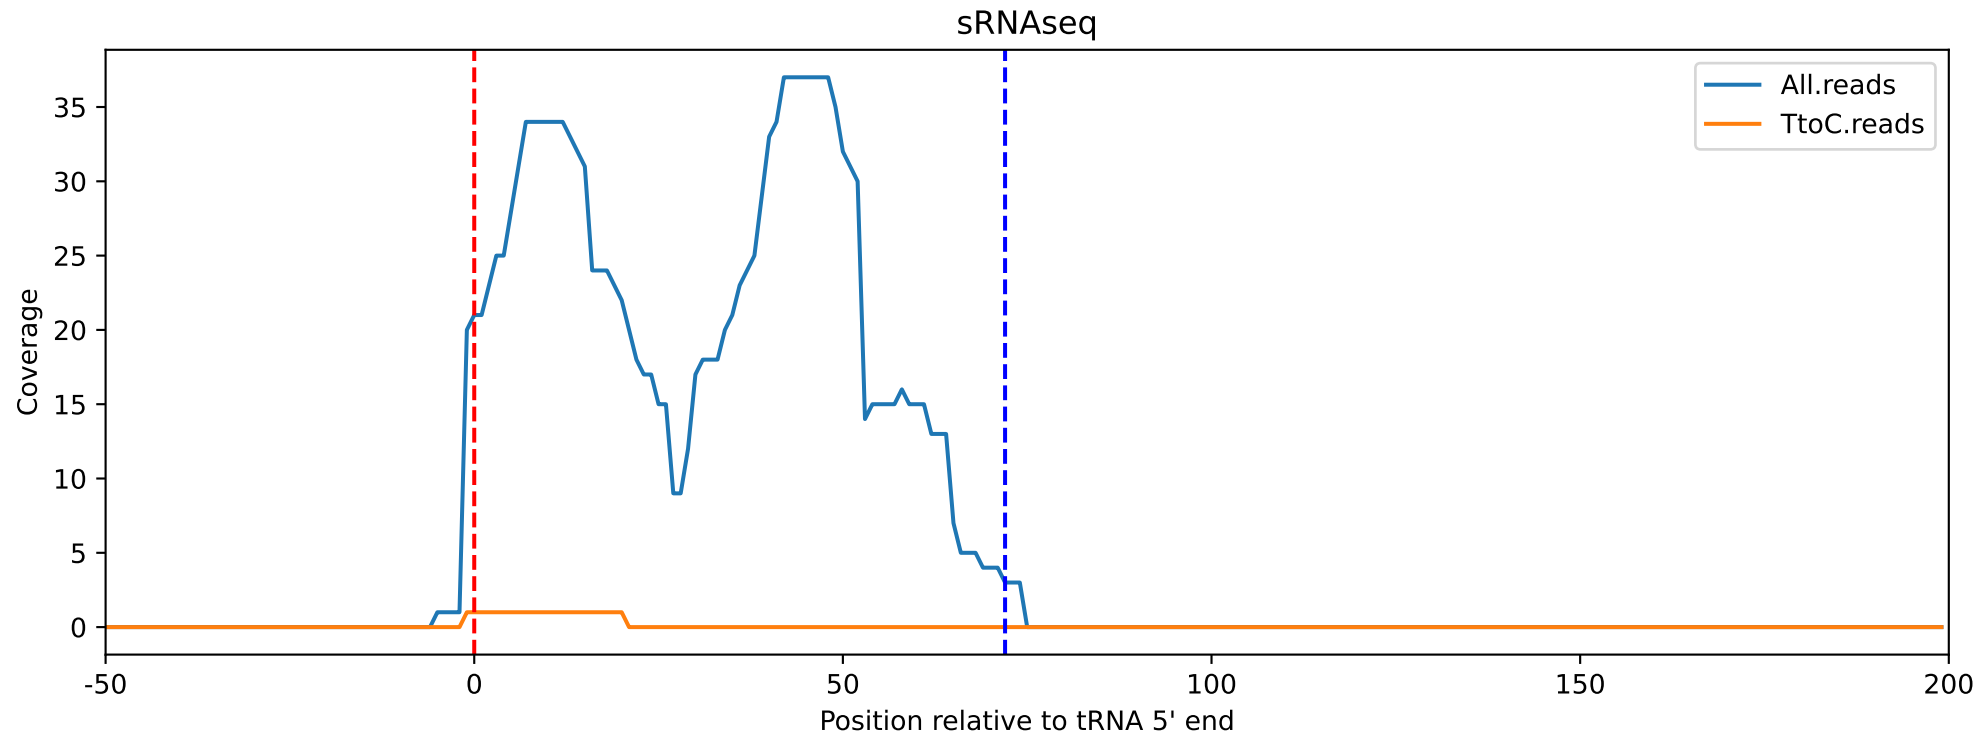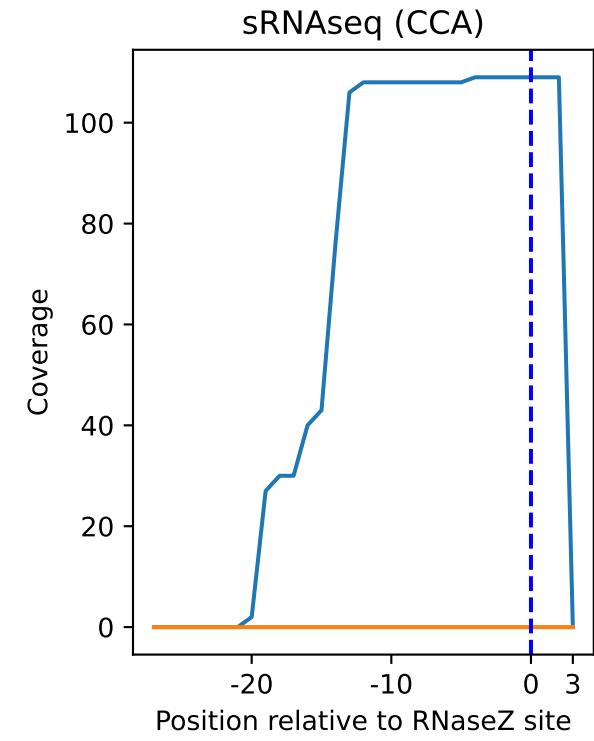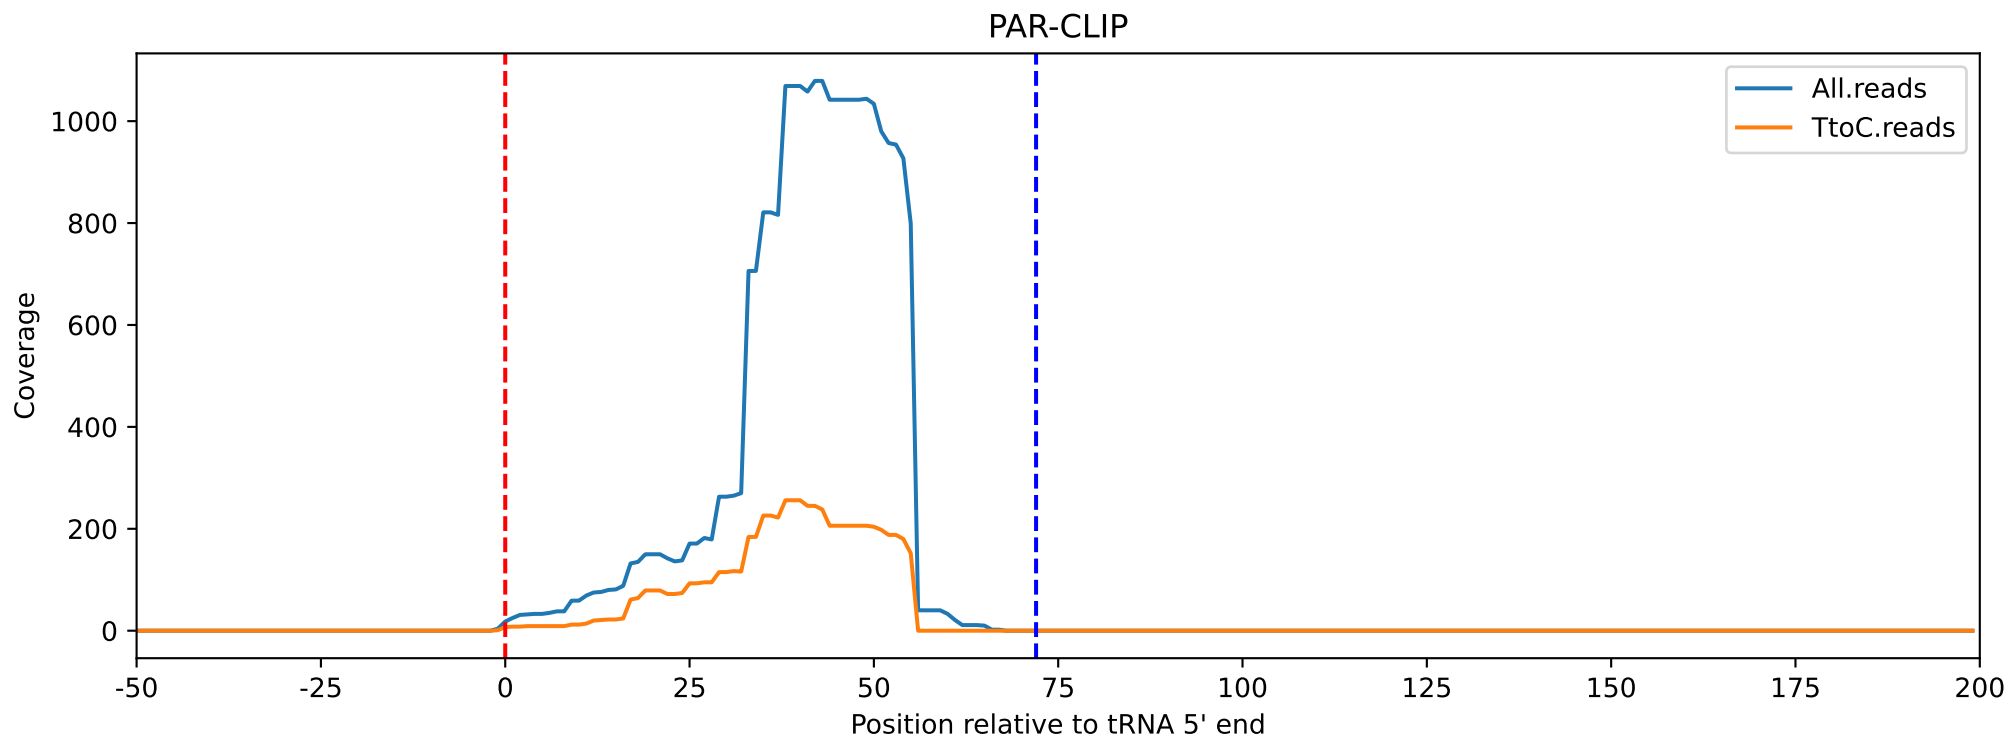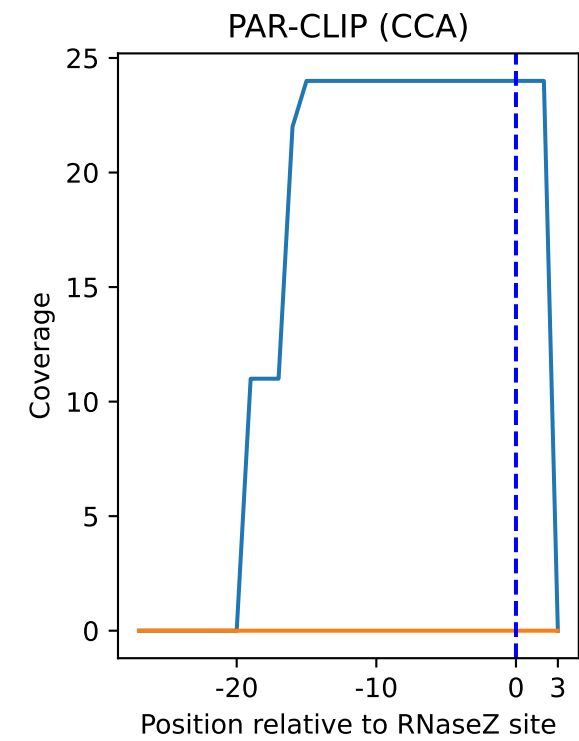

# tRNA-Gln-CTG-4-1

## sRNAseq

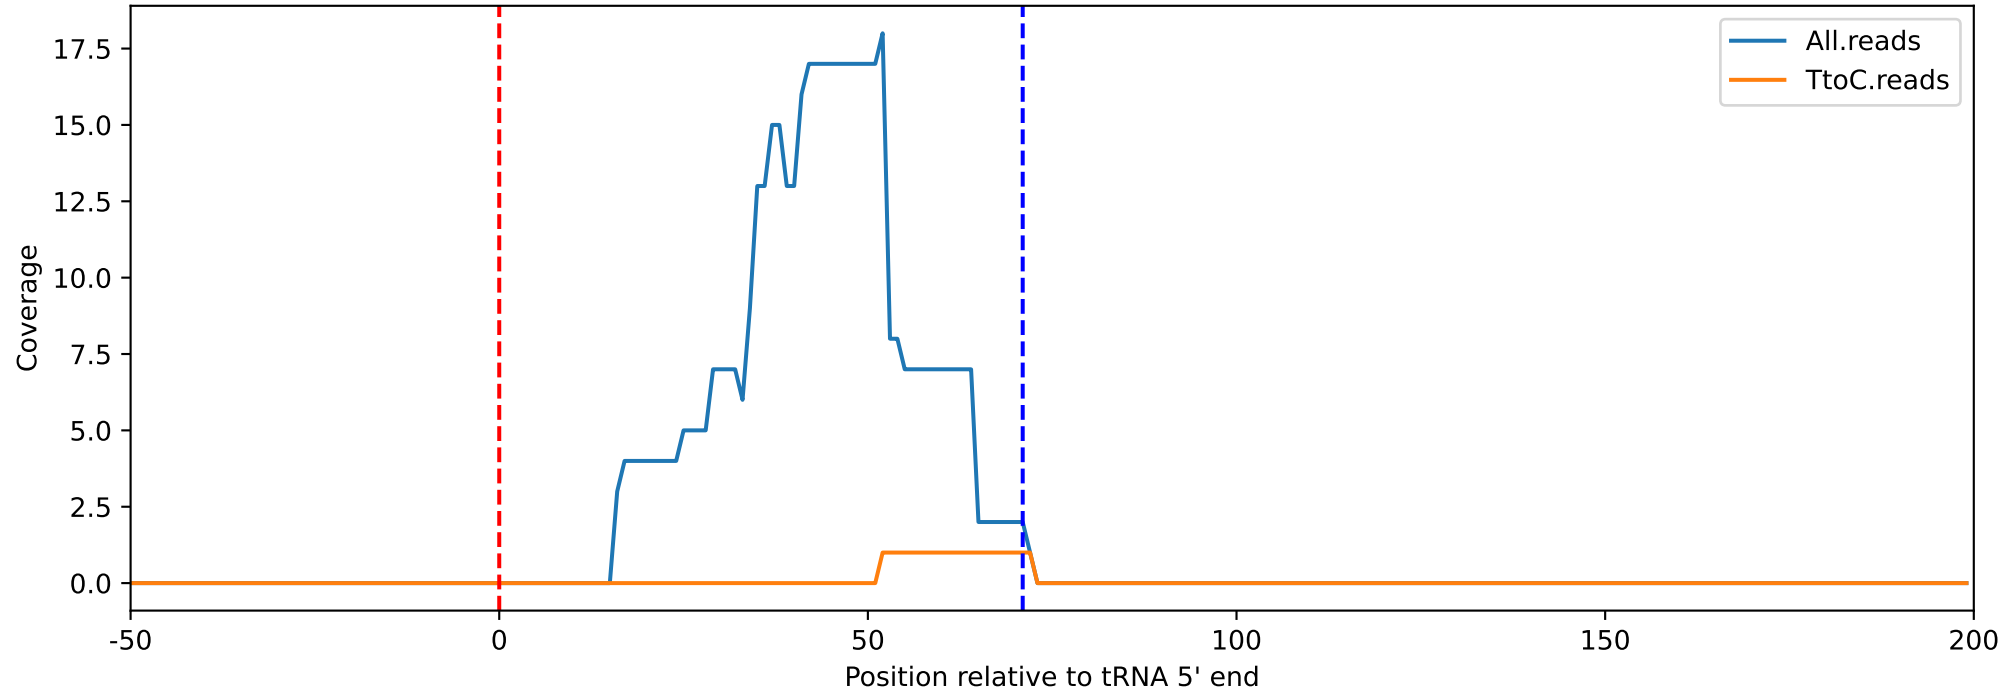

## sRNAseq (CCA)



## PAR-CLIP

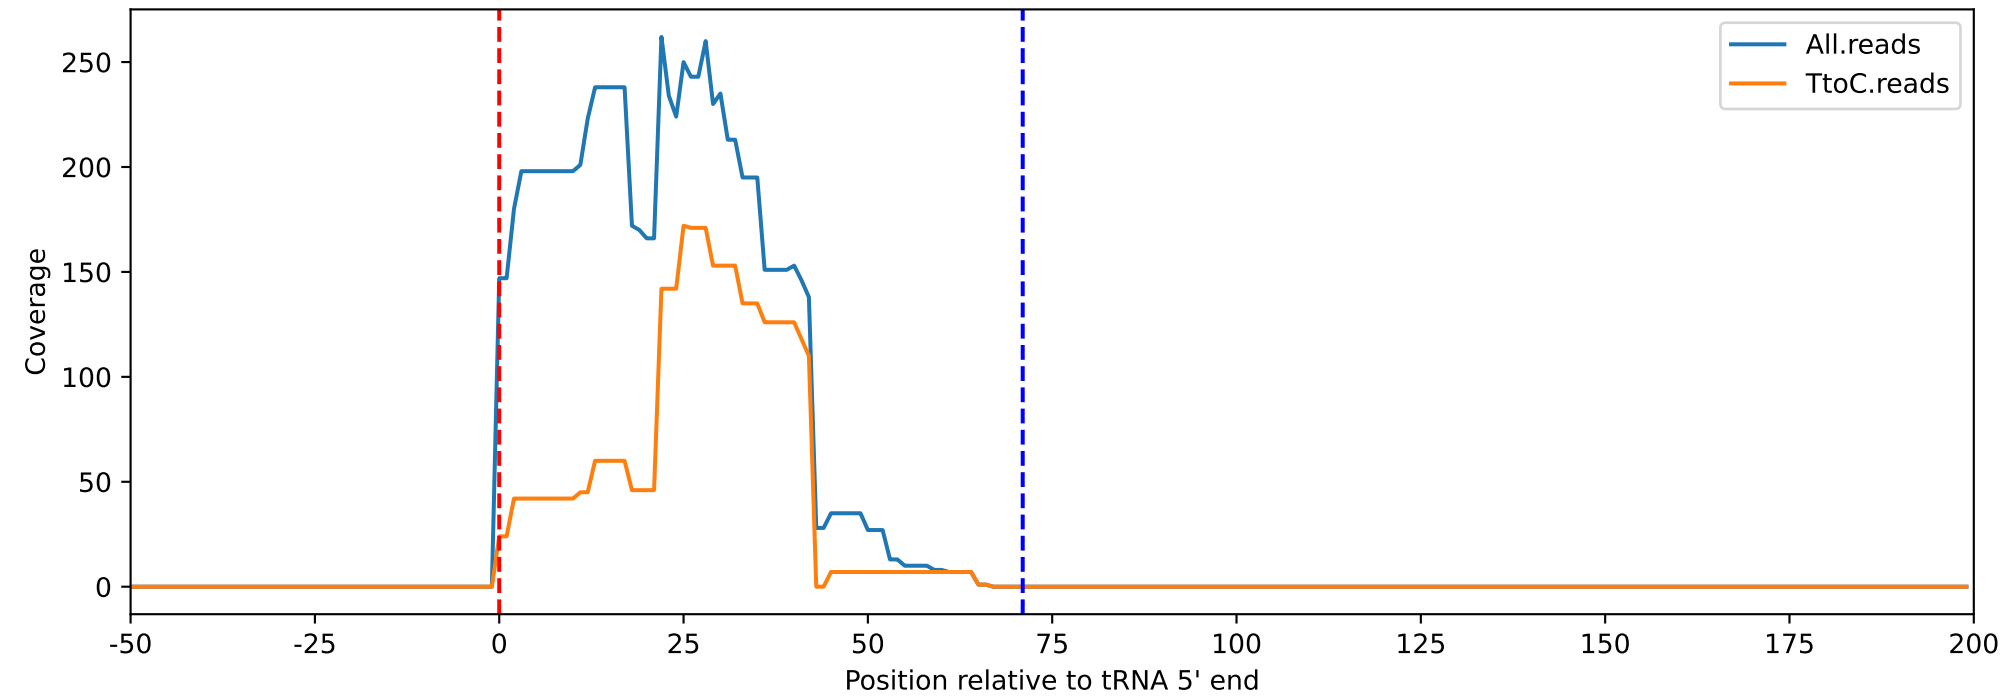

## PAR-CLIP (CCA)

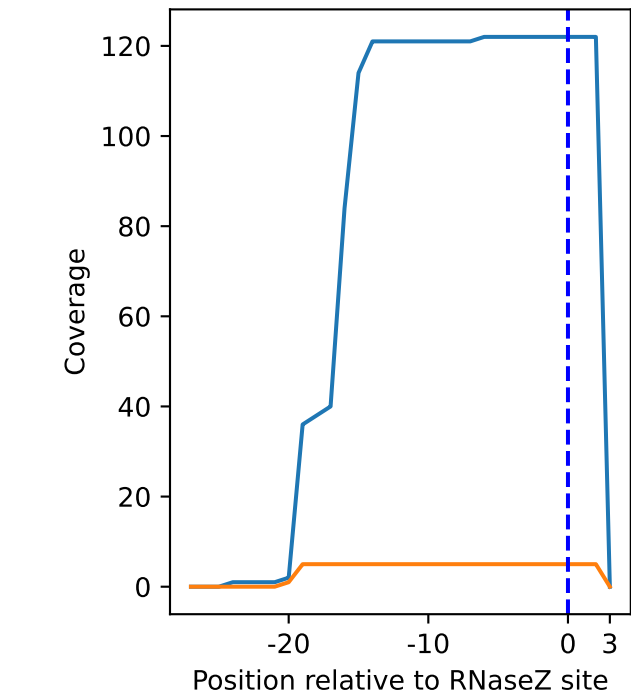

# tRNA-Arg-ACG-1-4

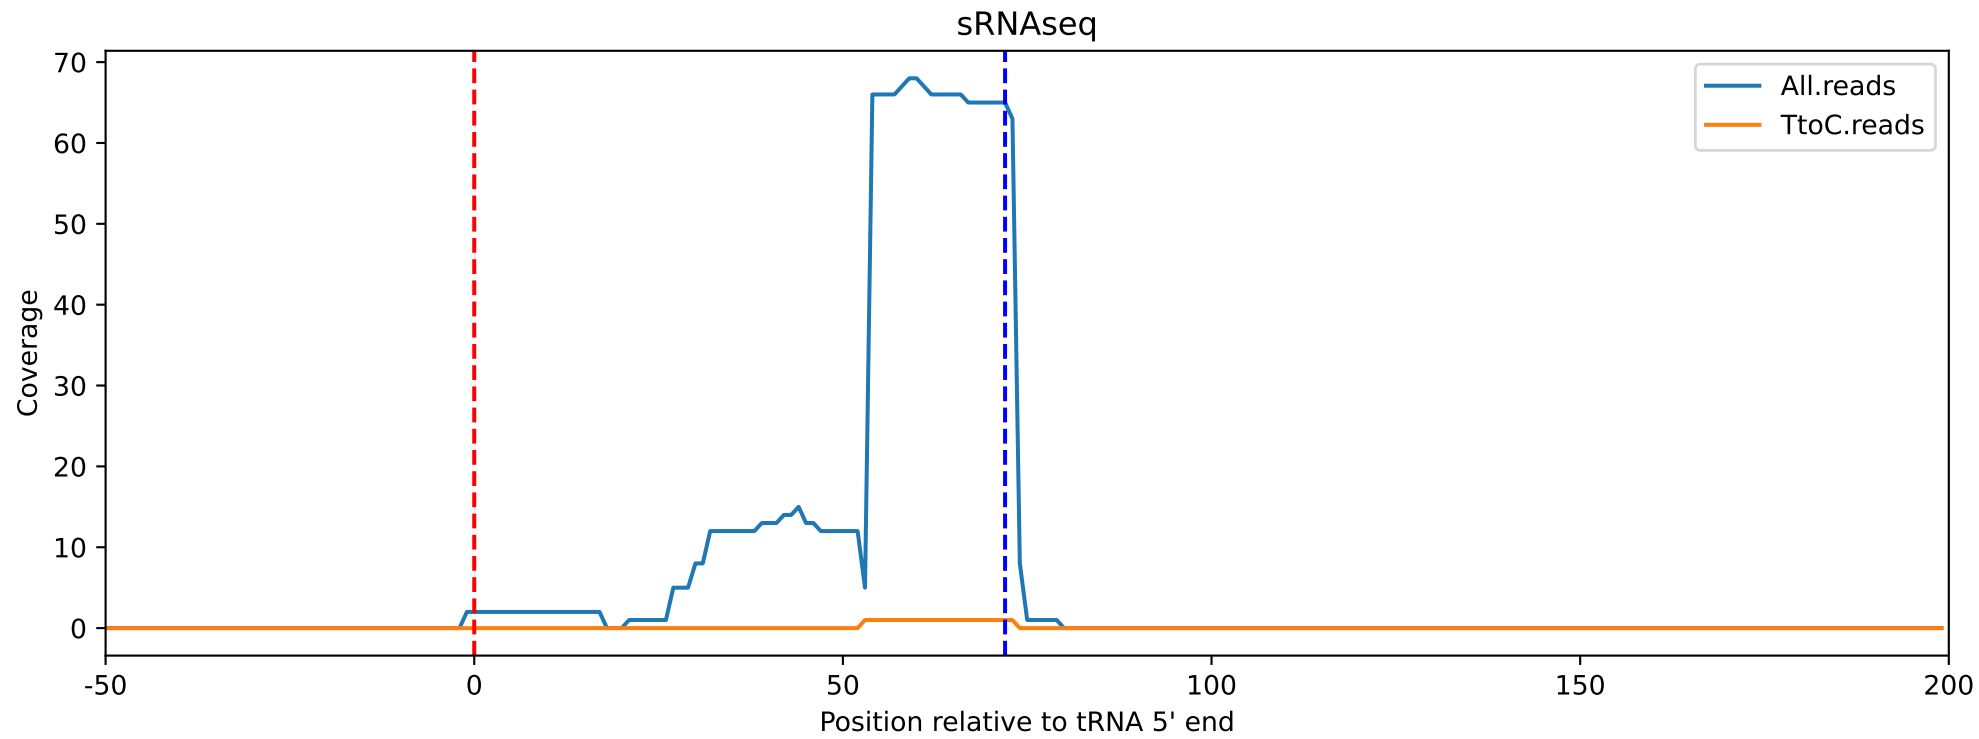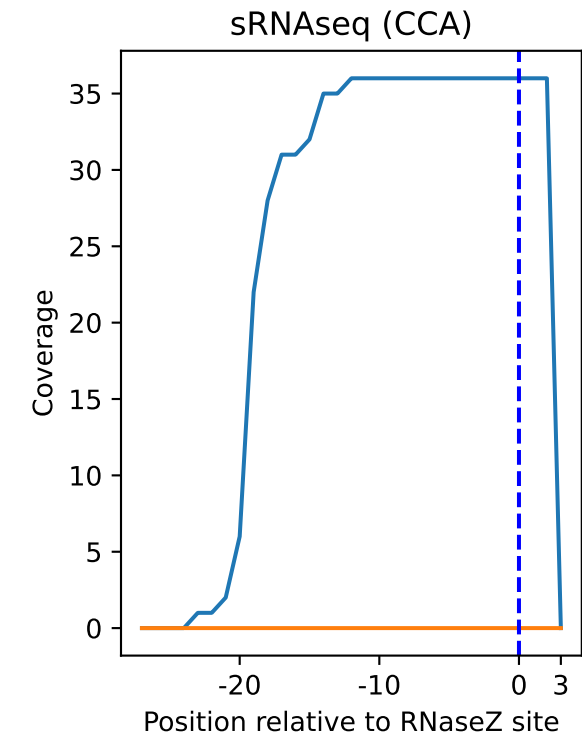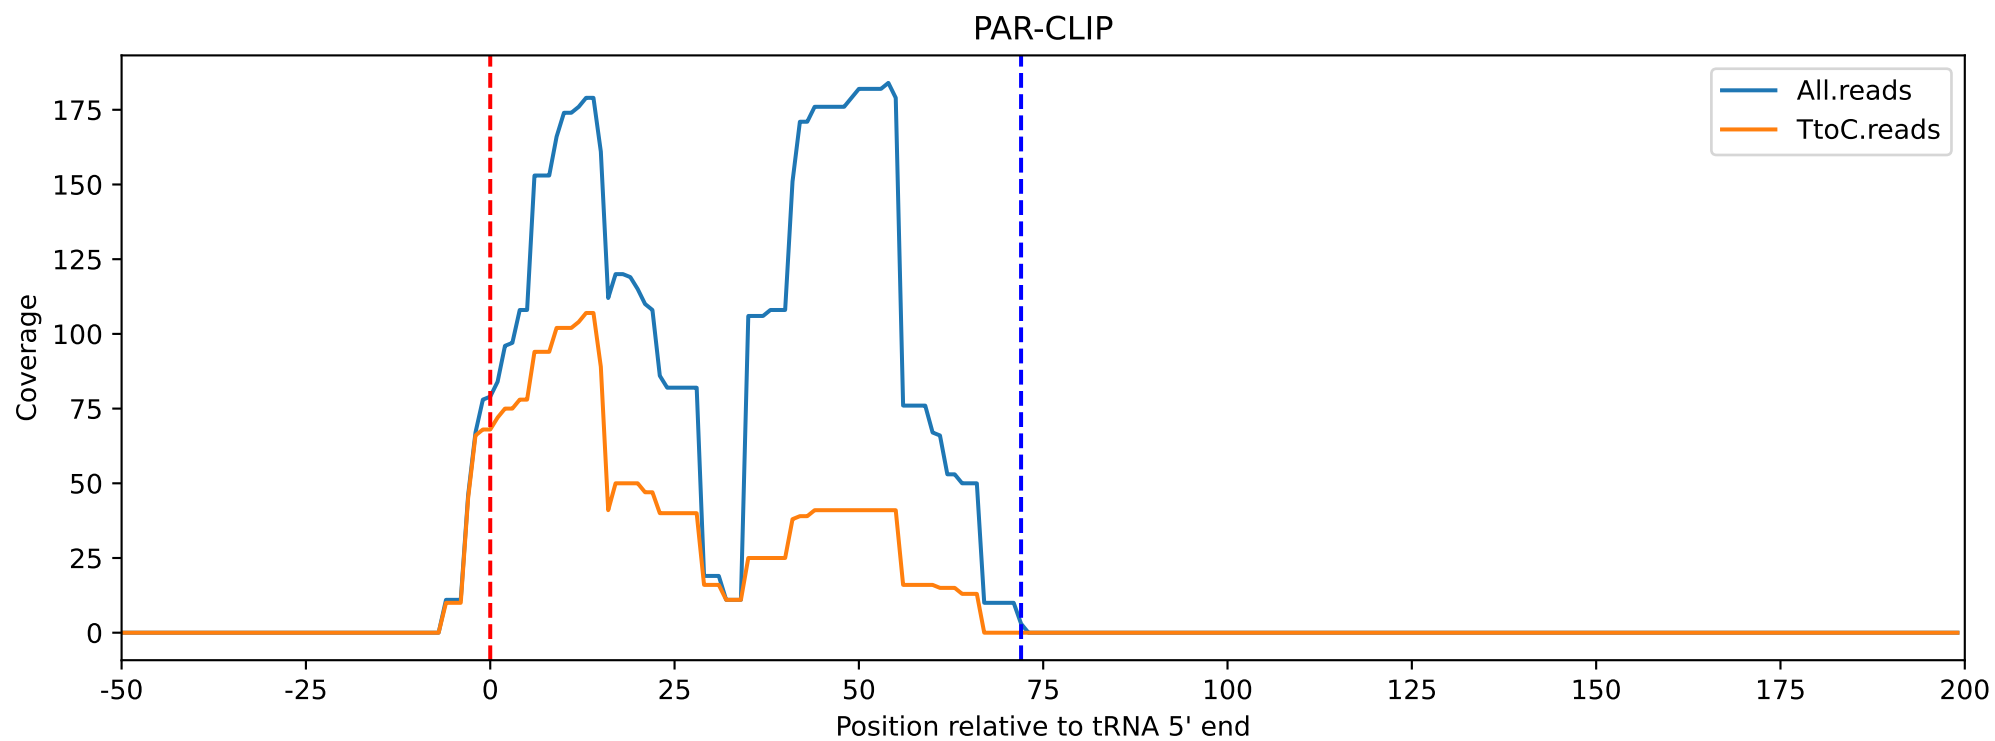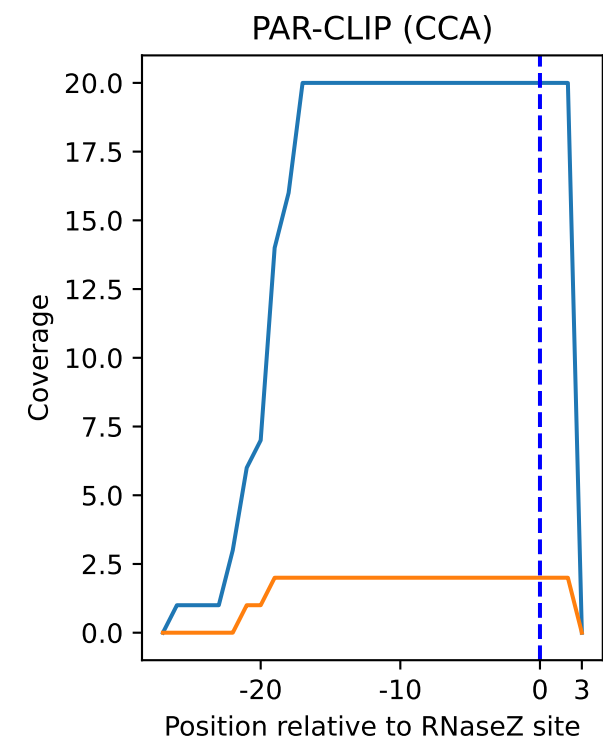

# tRNA-Pro-AGG-1-5

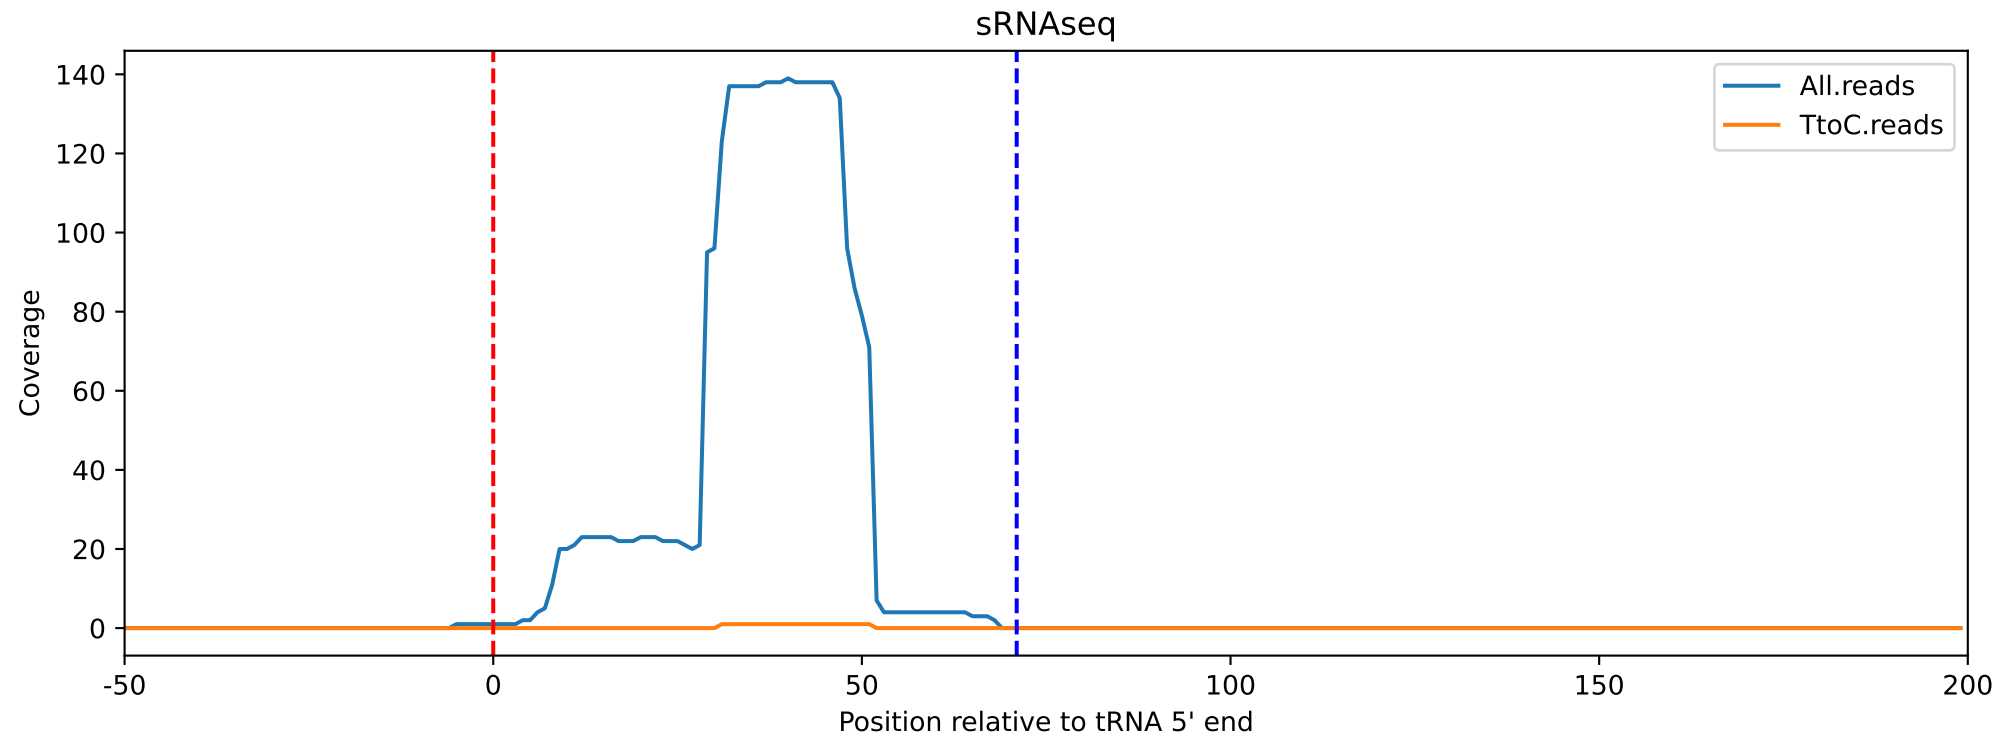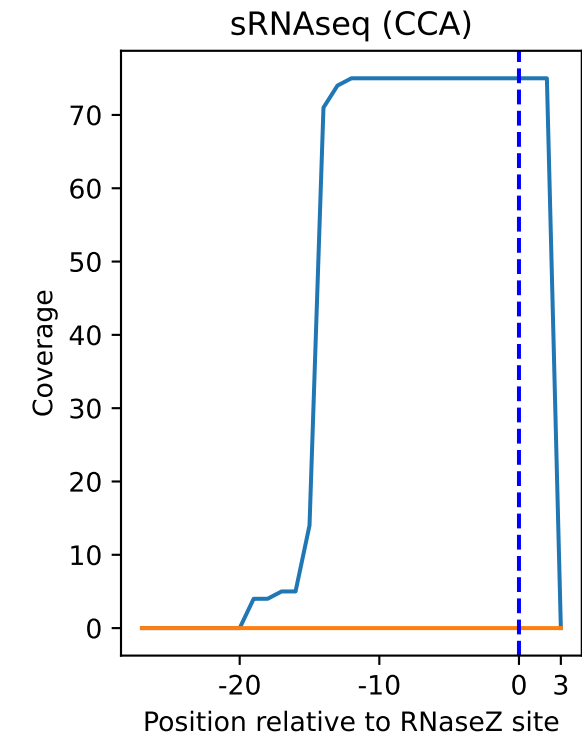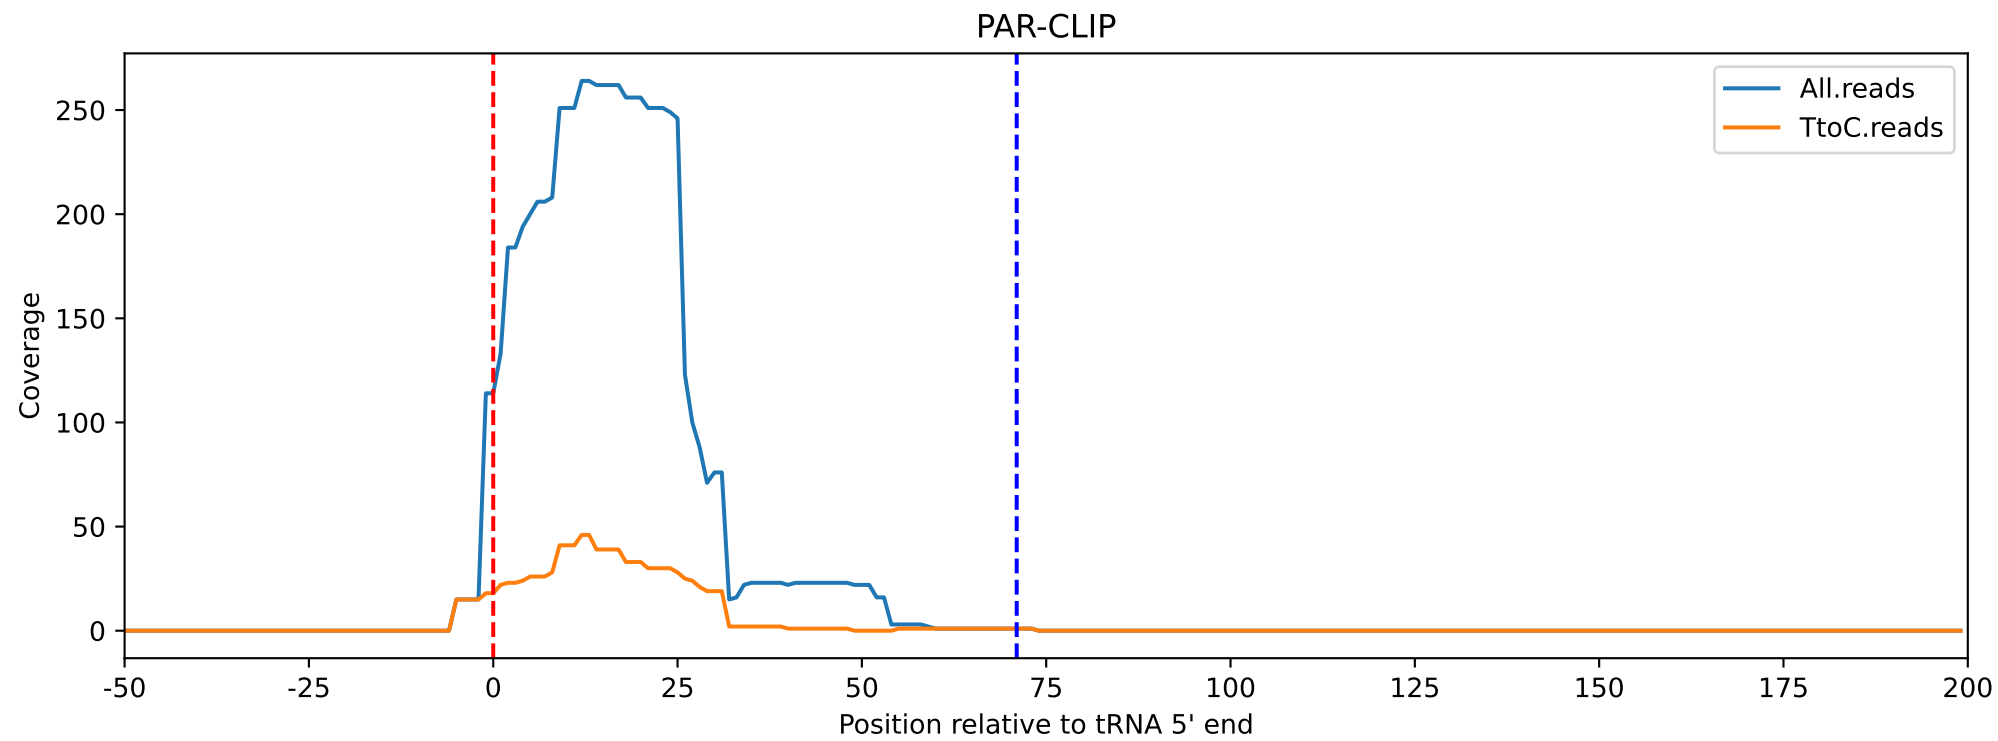

# tRNA-Tyr-GTA-1-6

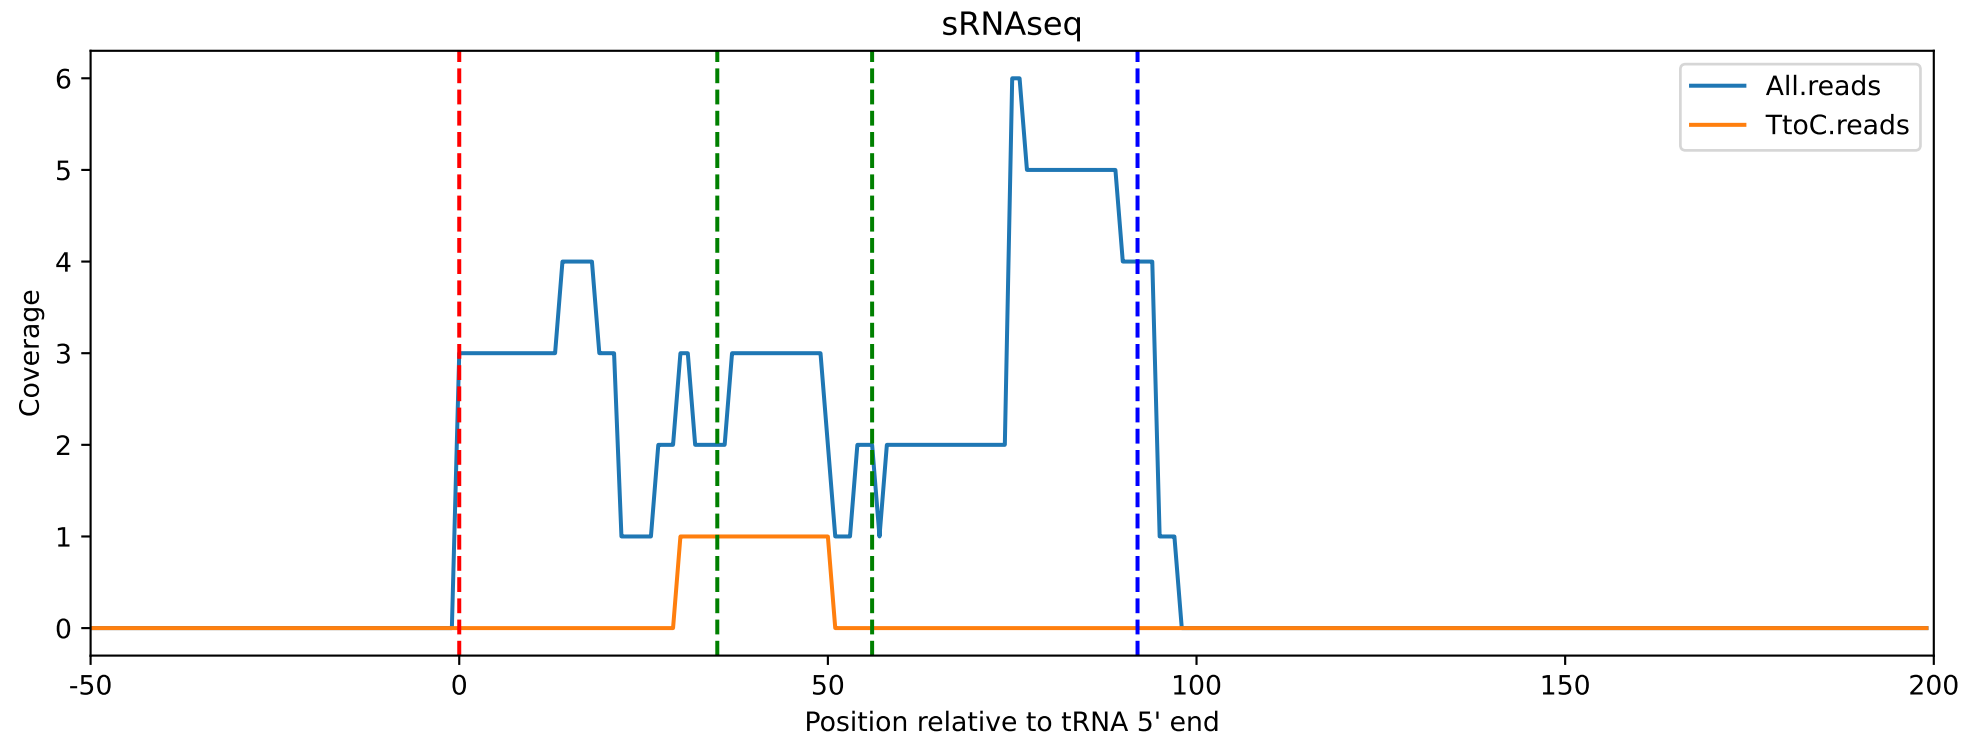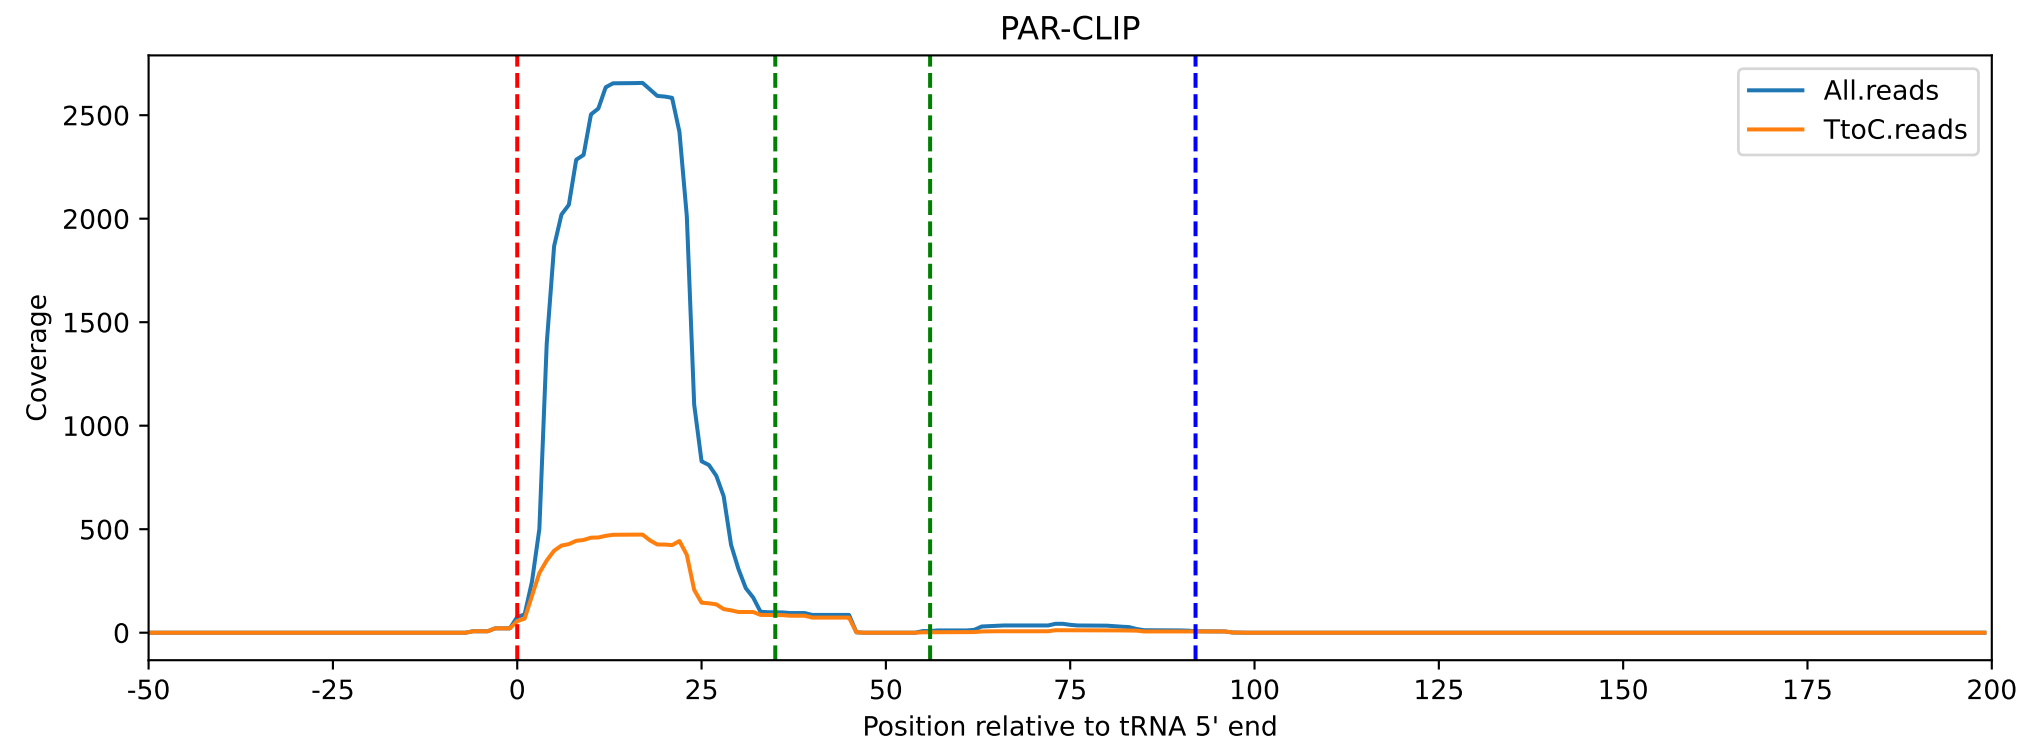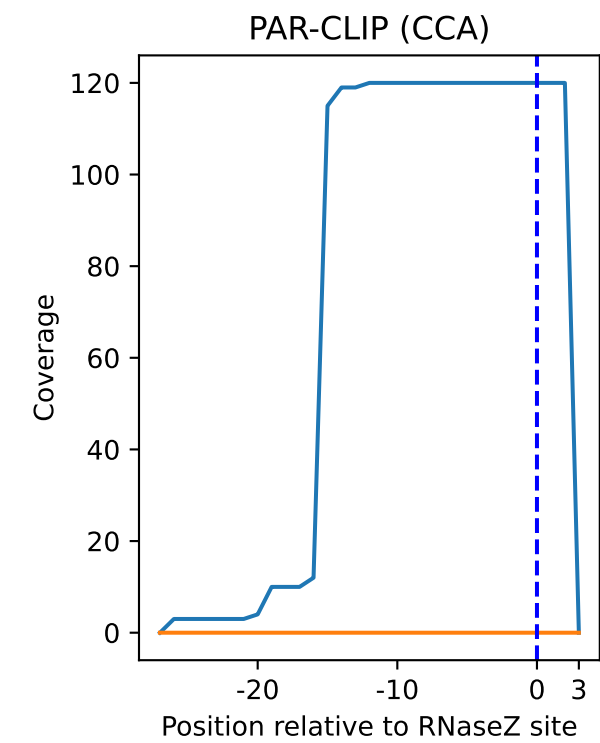



# tRNA-Thr-TGT-1-1

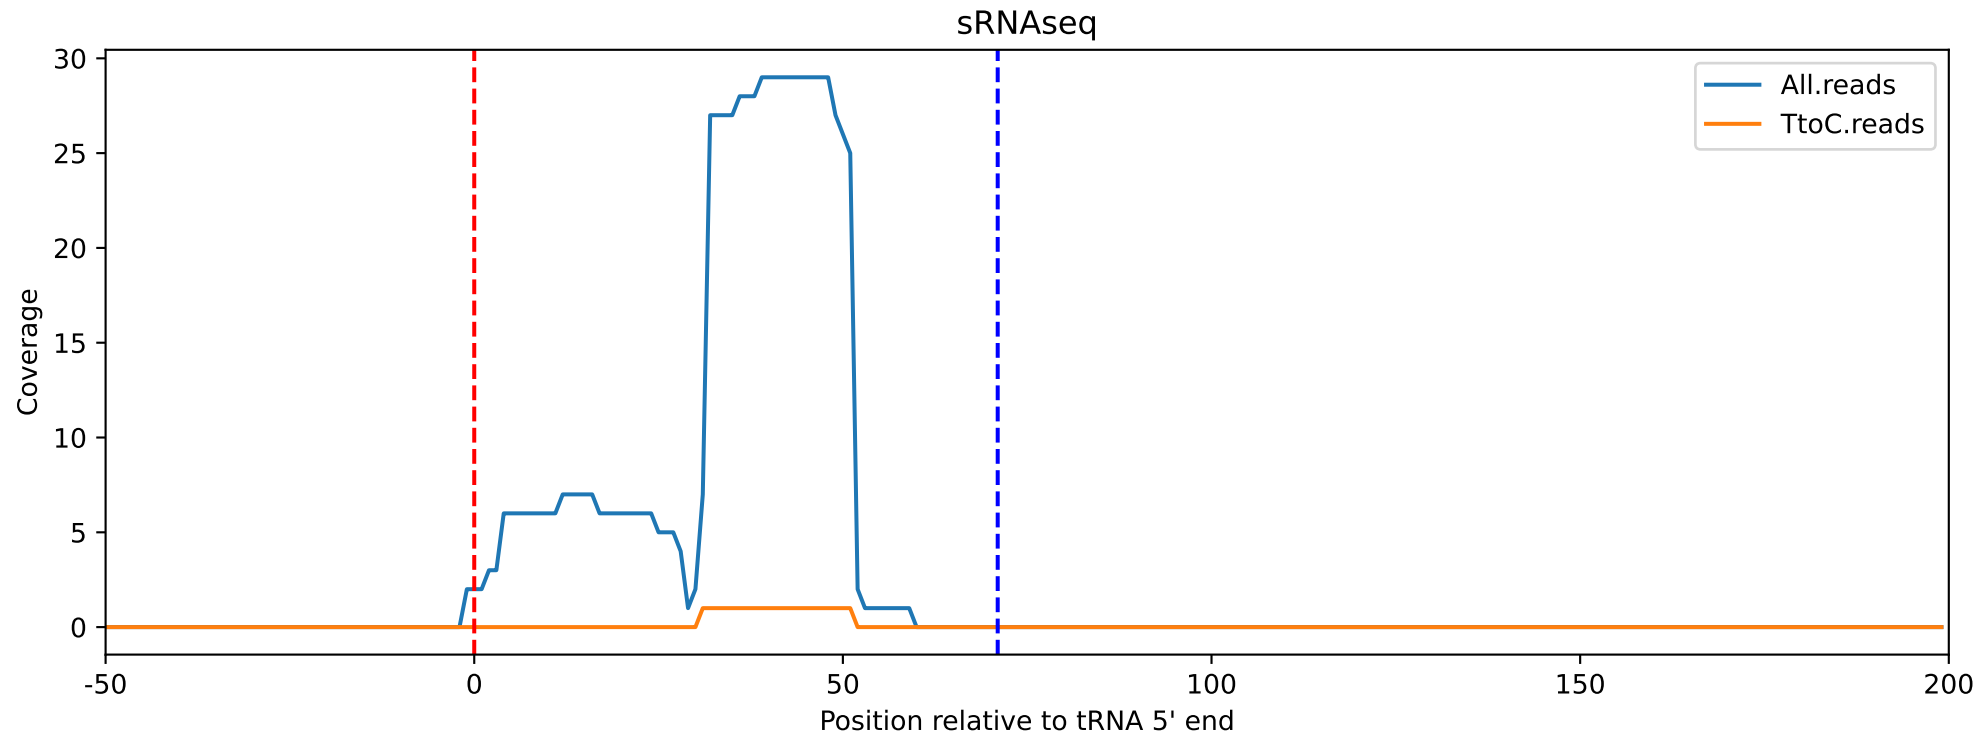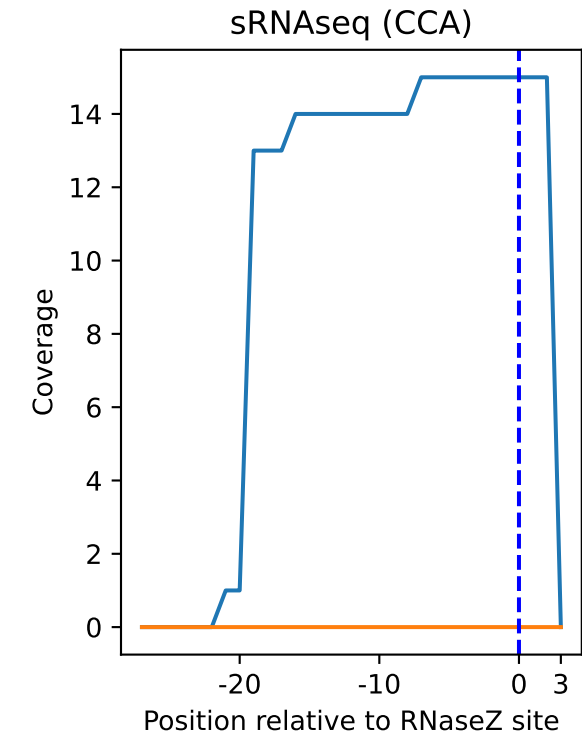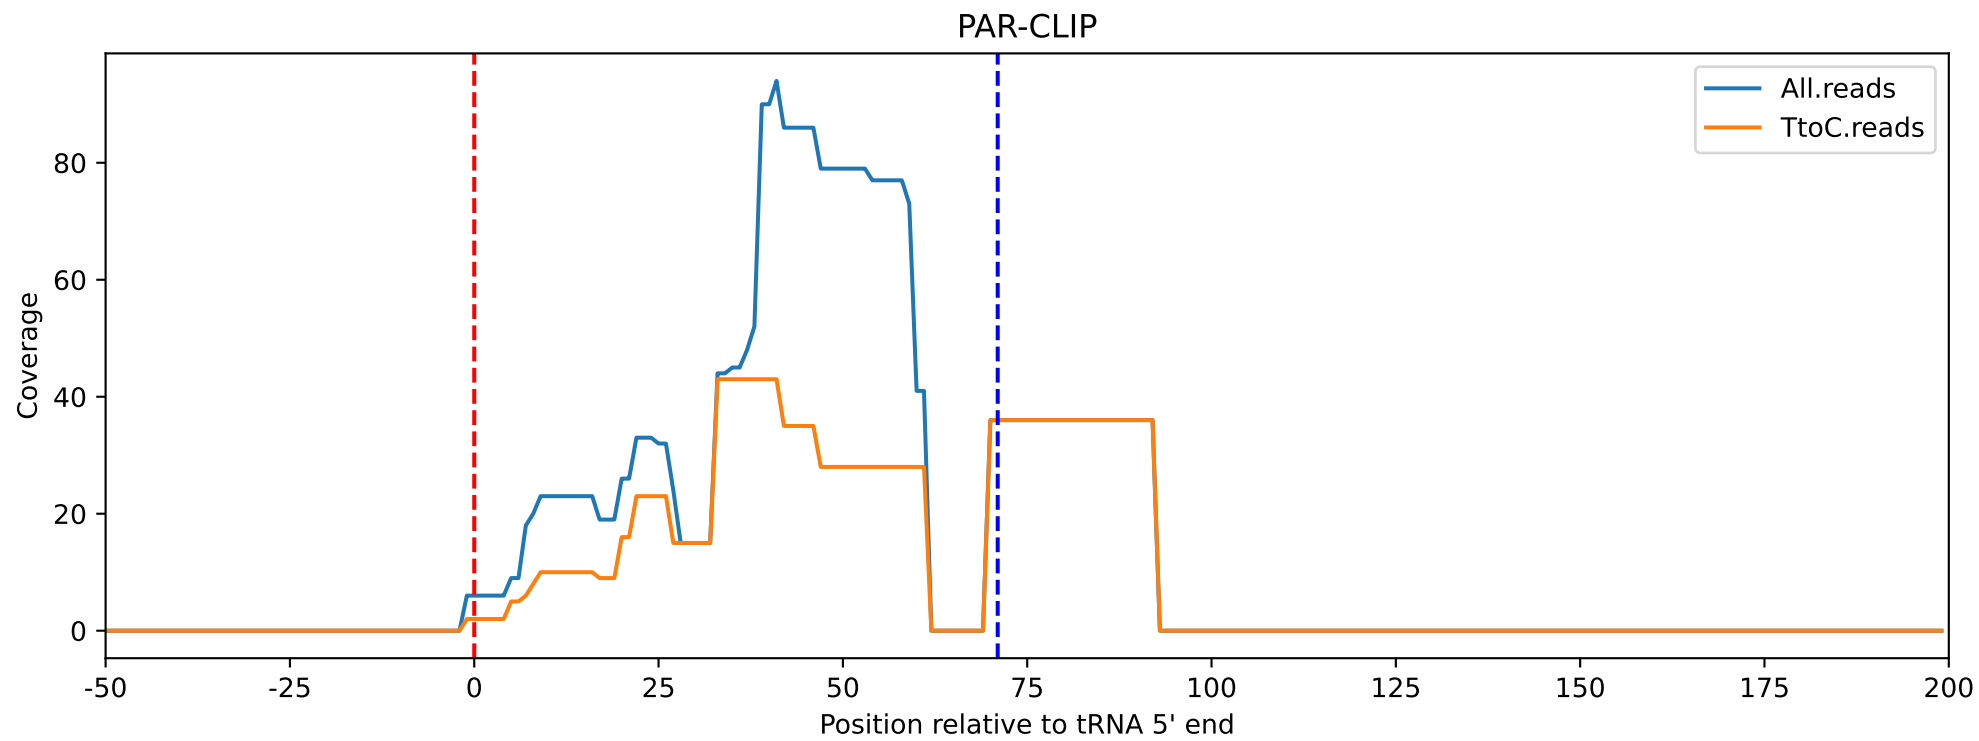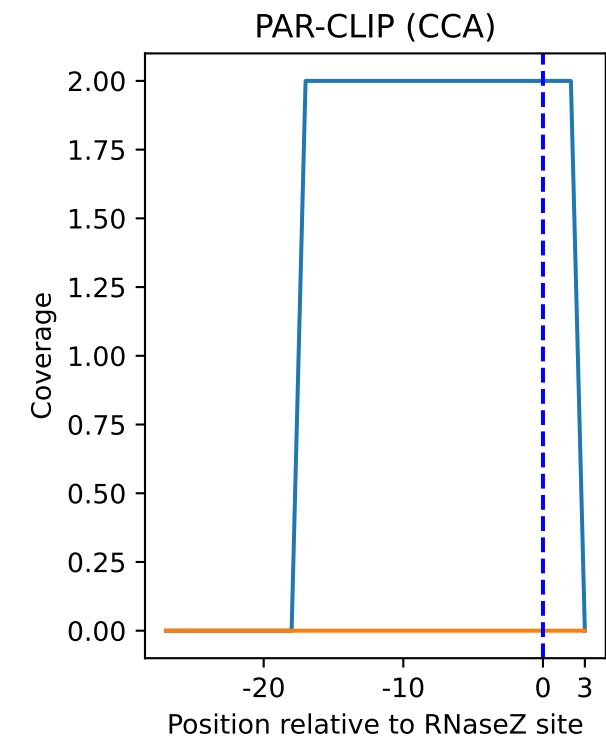

# tRNA-Ala-AGC-2-4

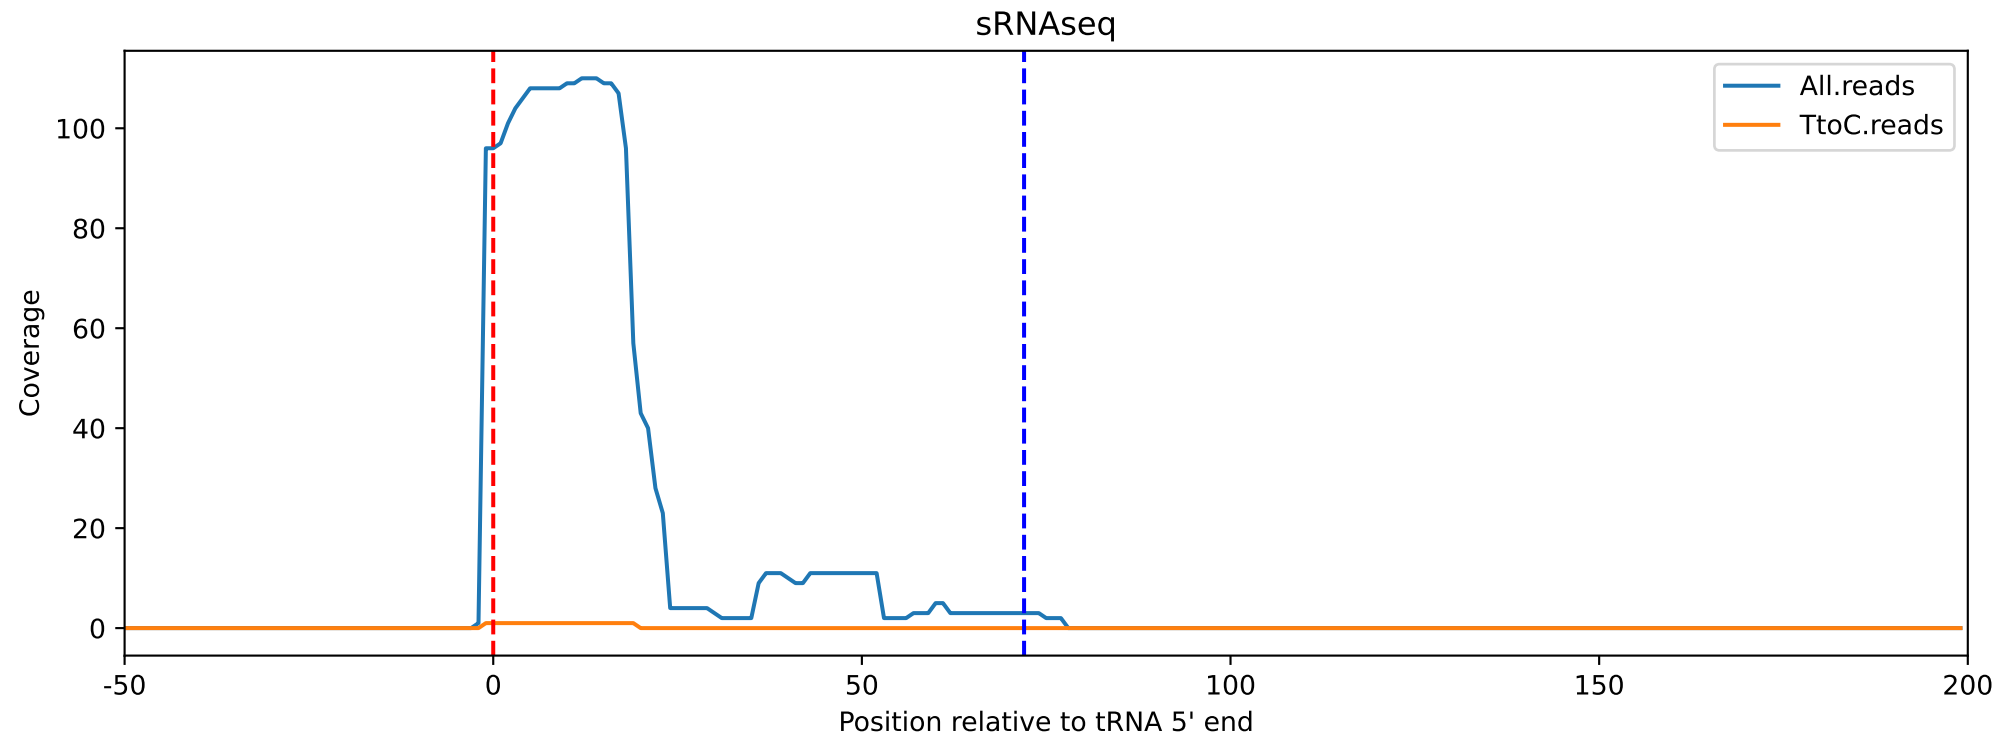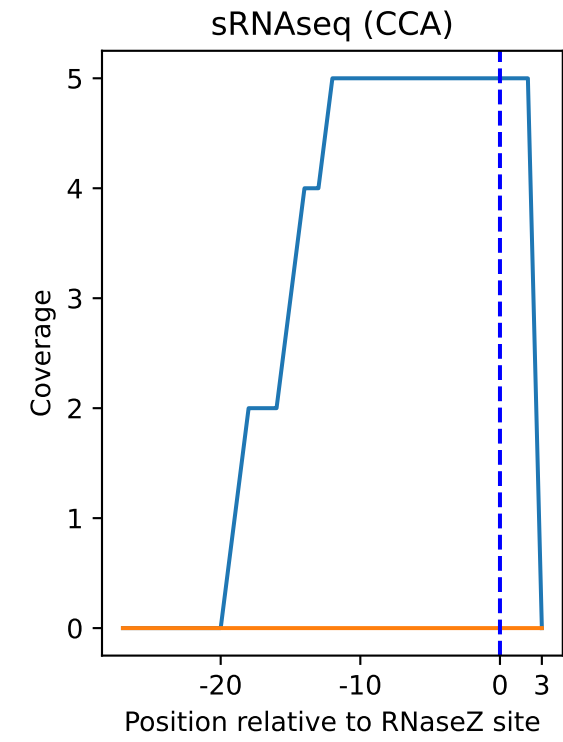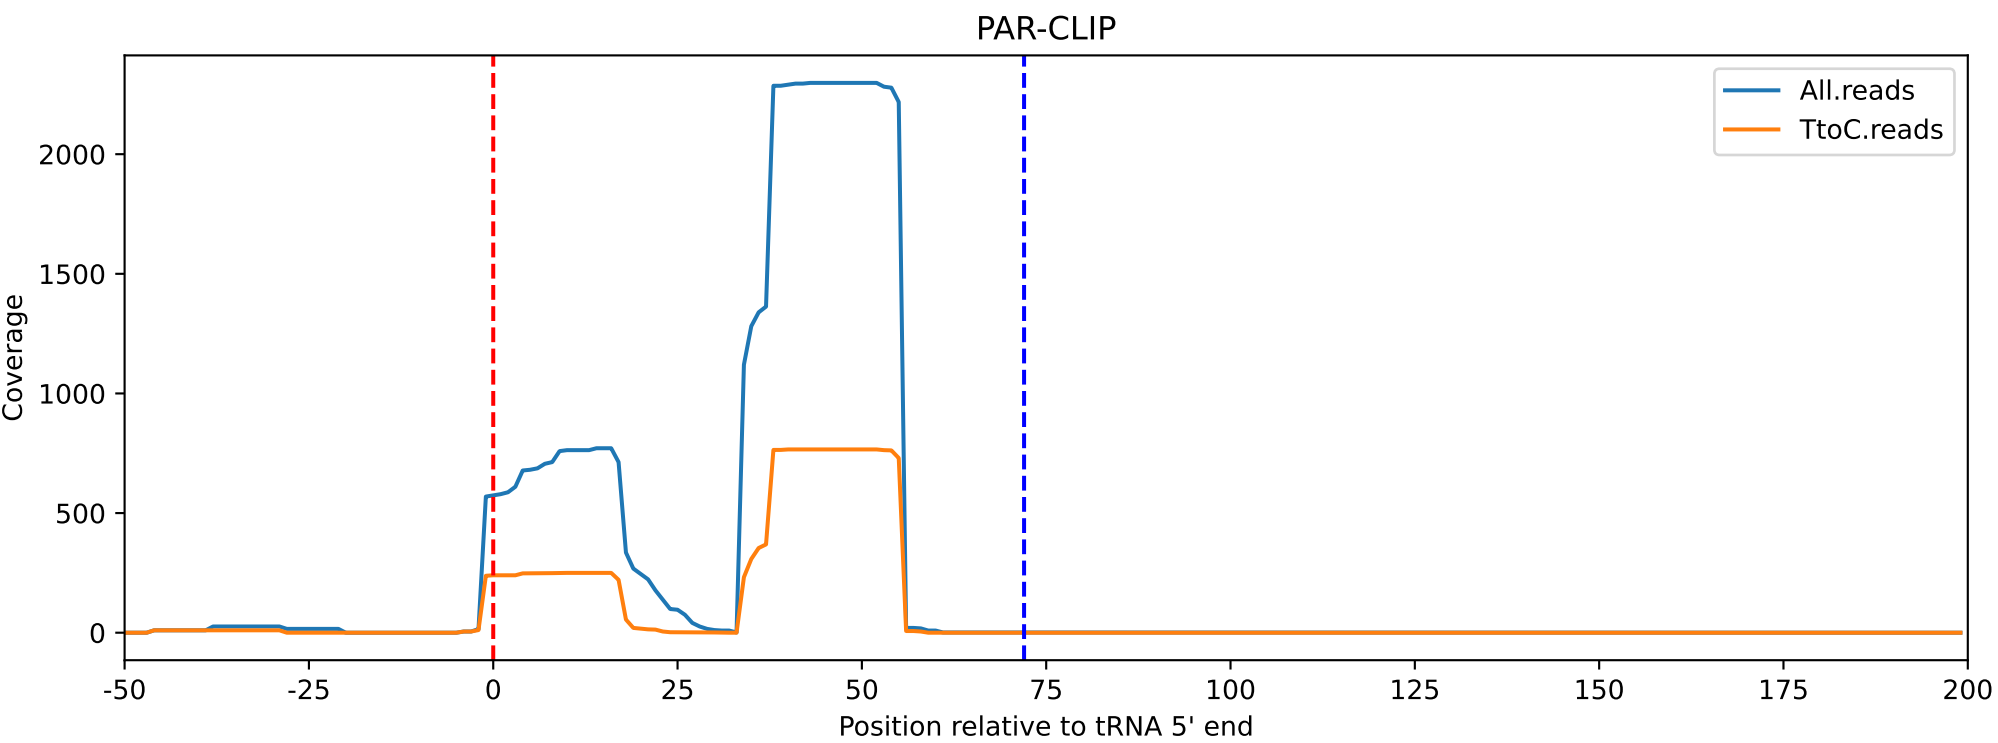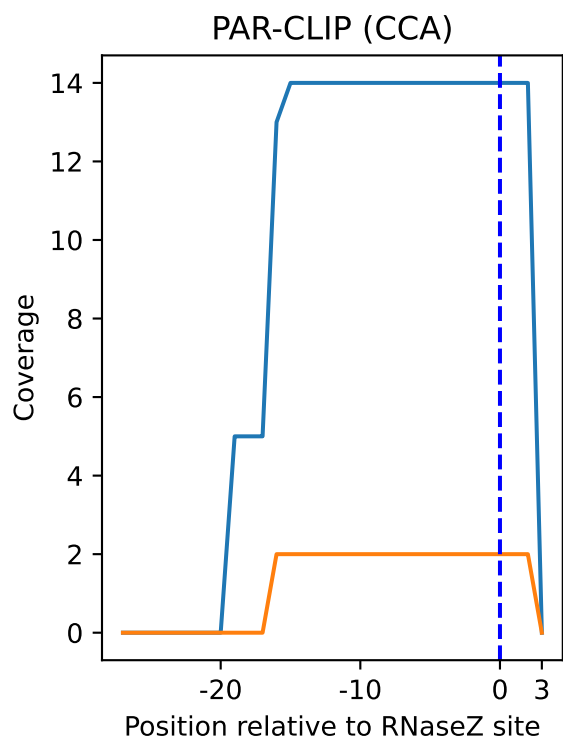

# tRNA-Arg-TCG-1-1

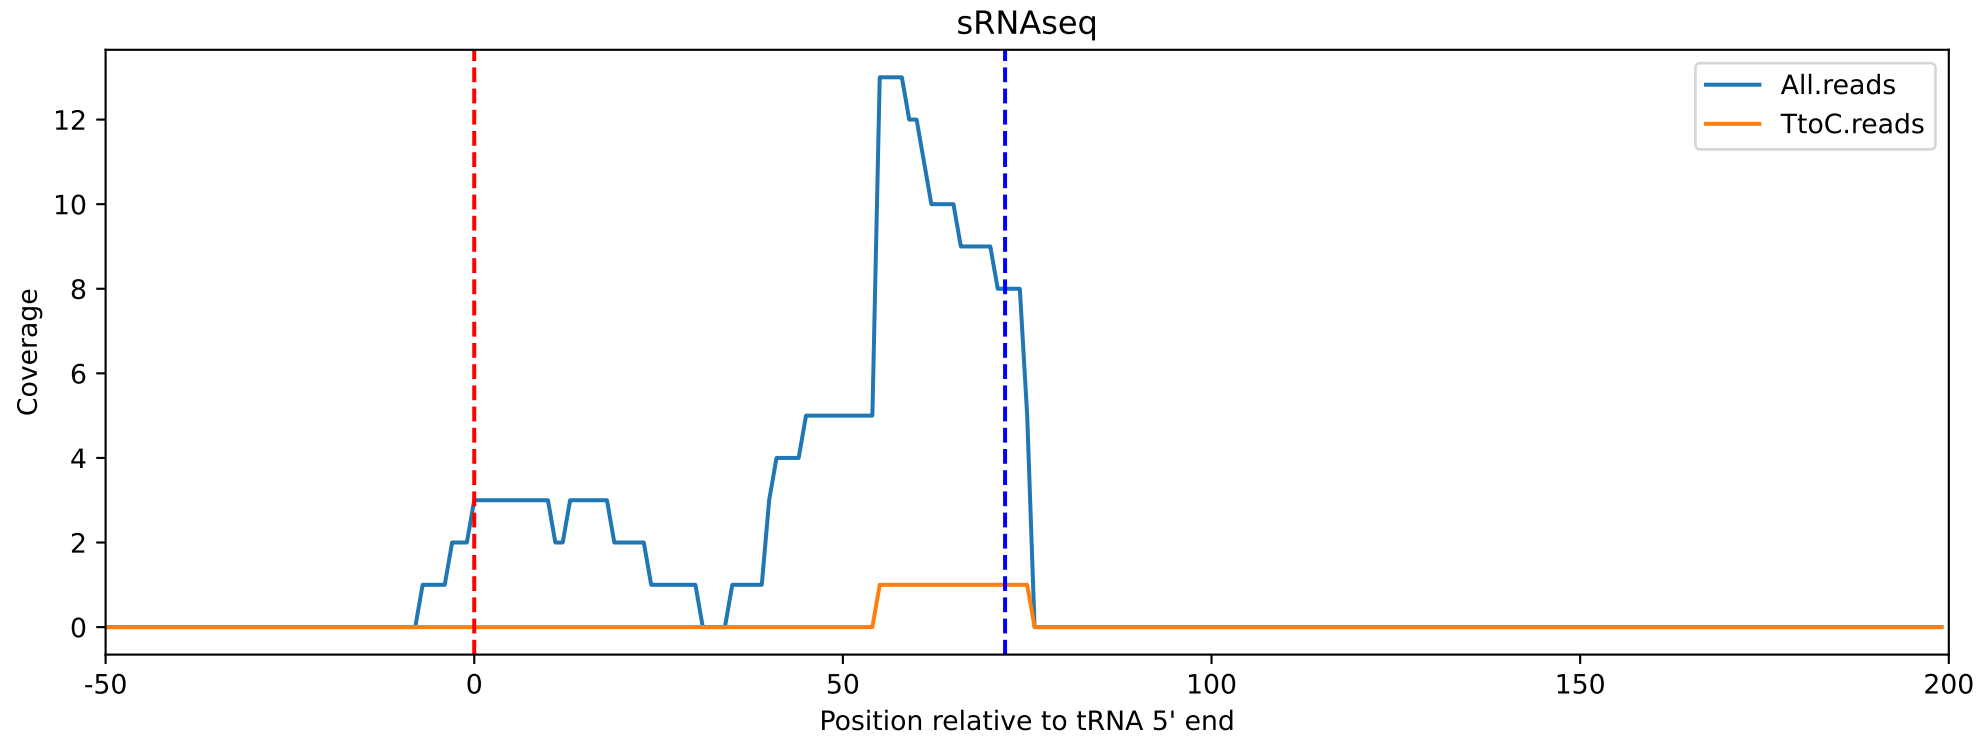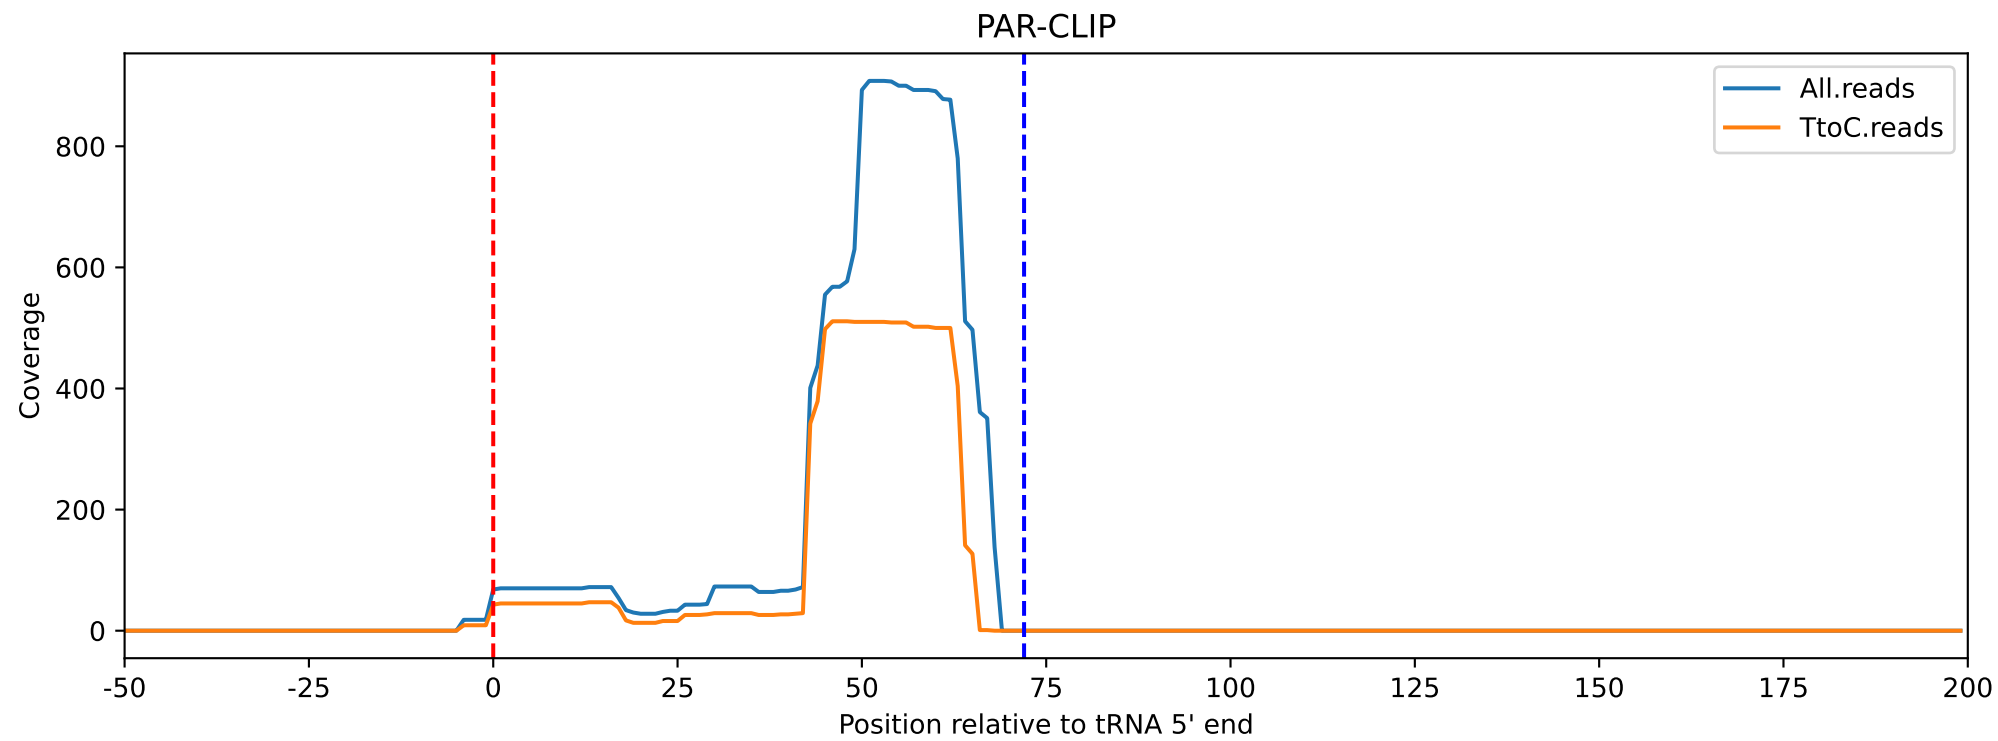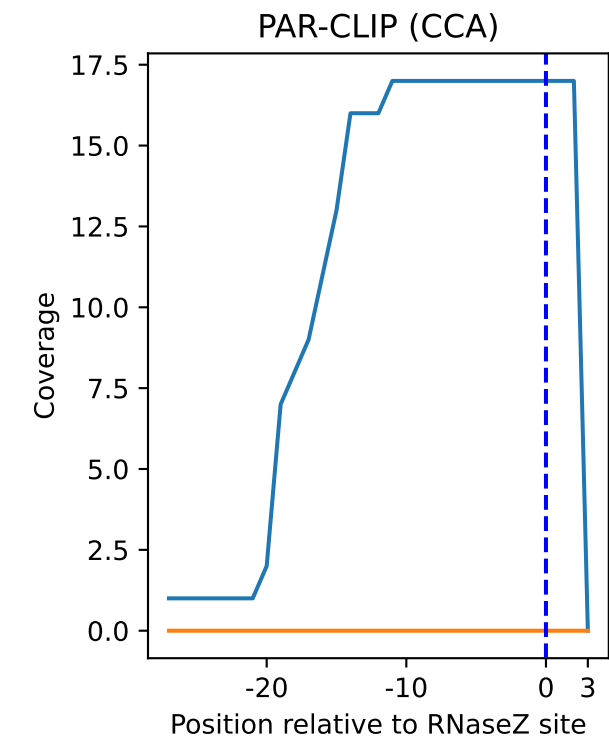

# tRNA-Ala-AGC-2-1

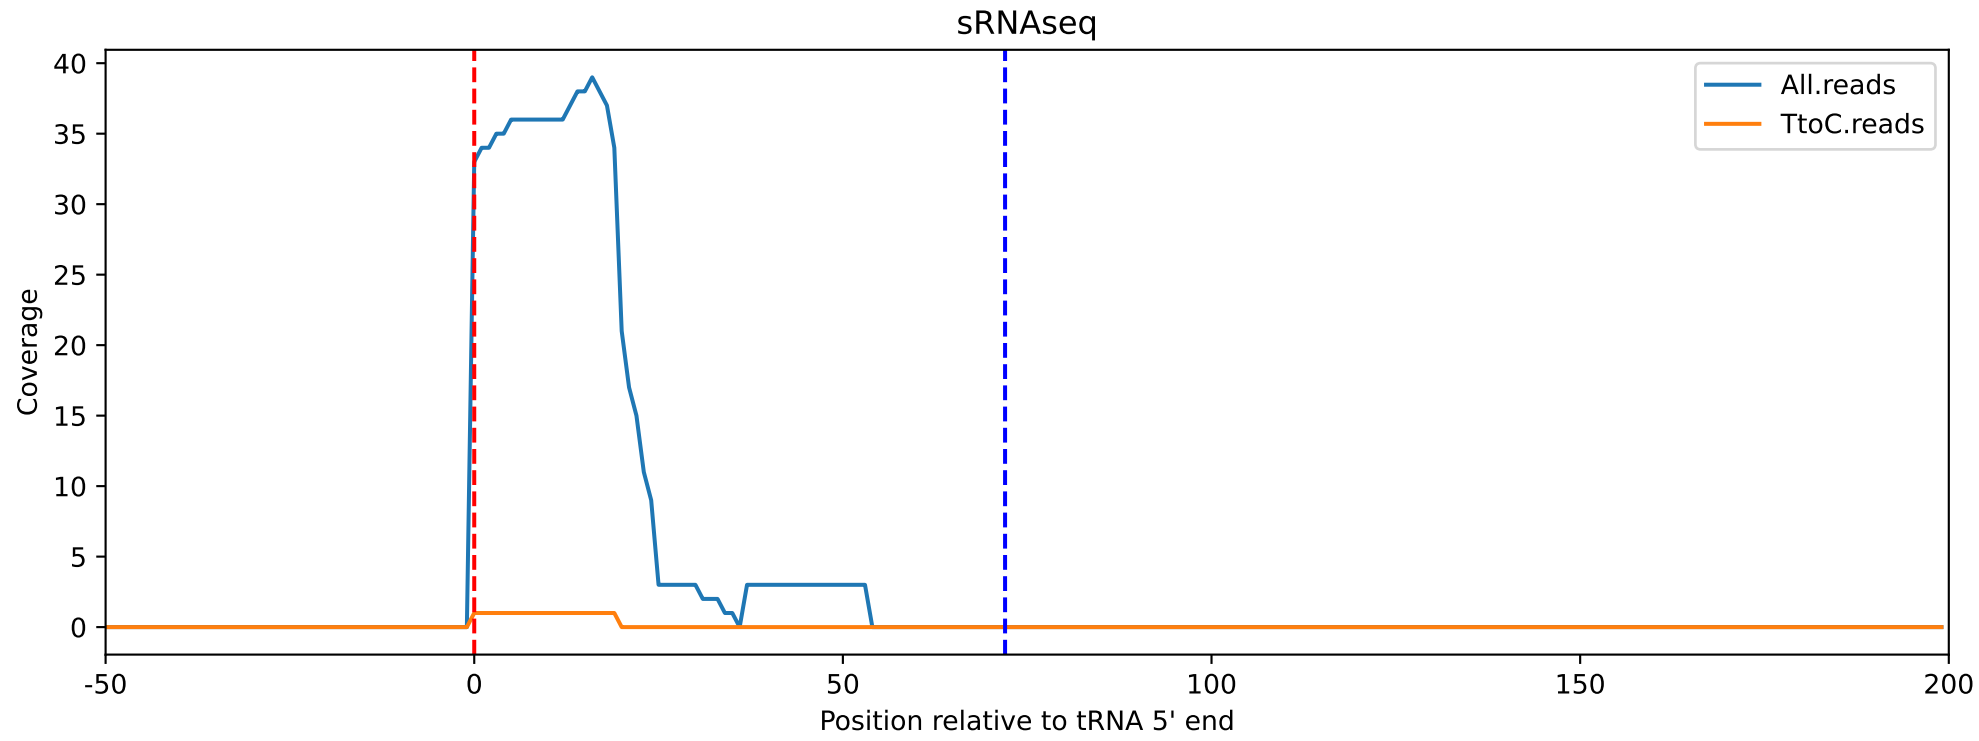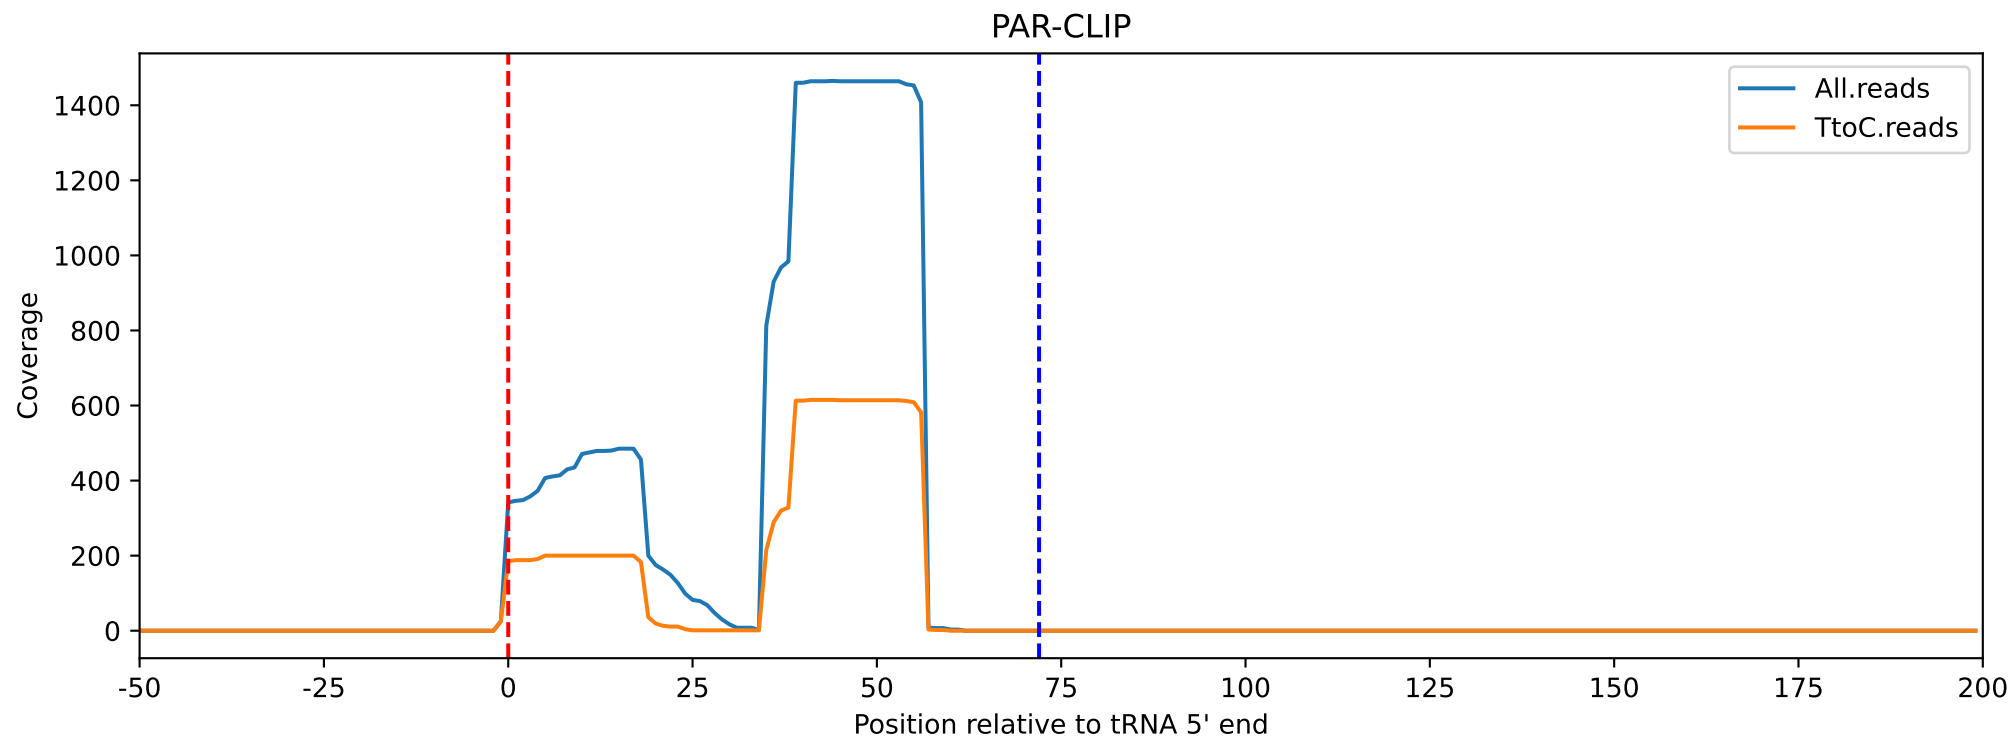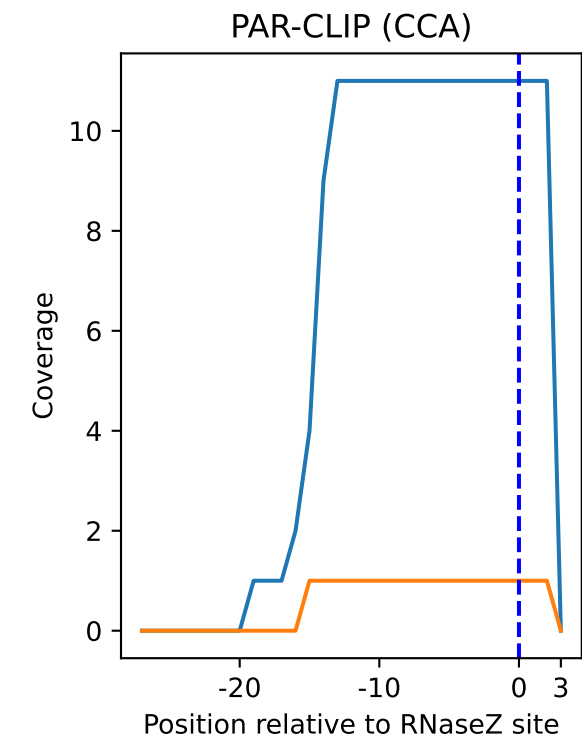

# tRNA-Thr-AGT-1-6

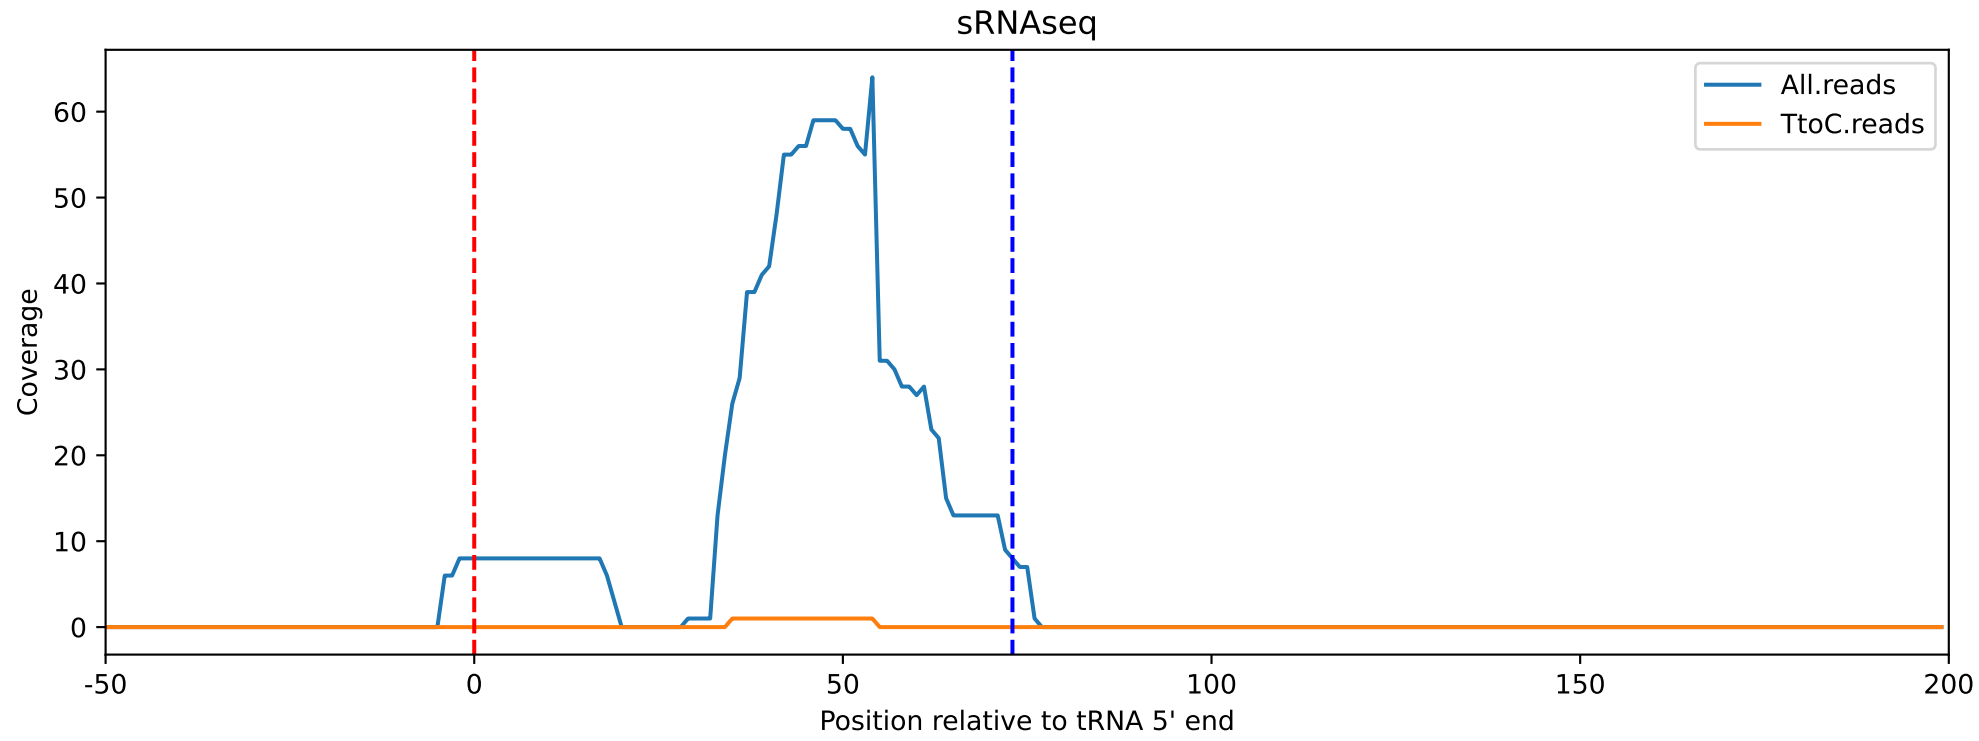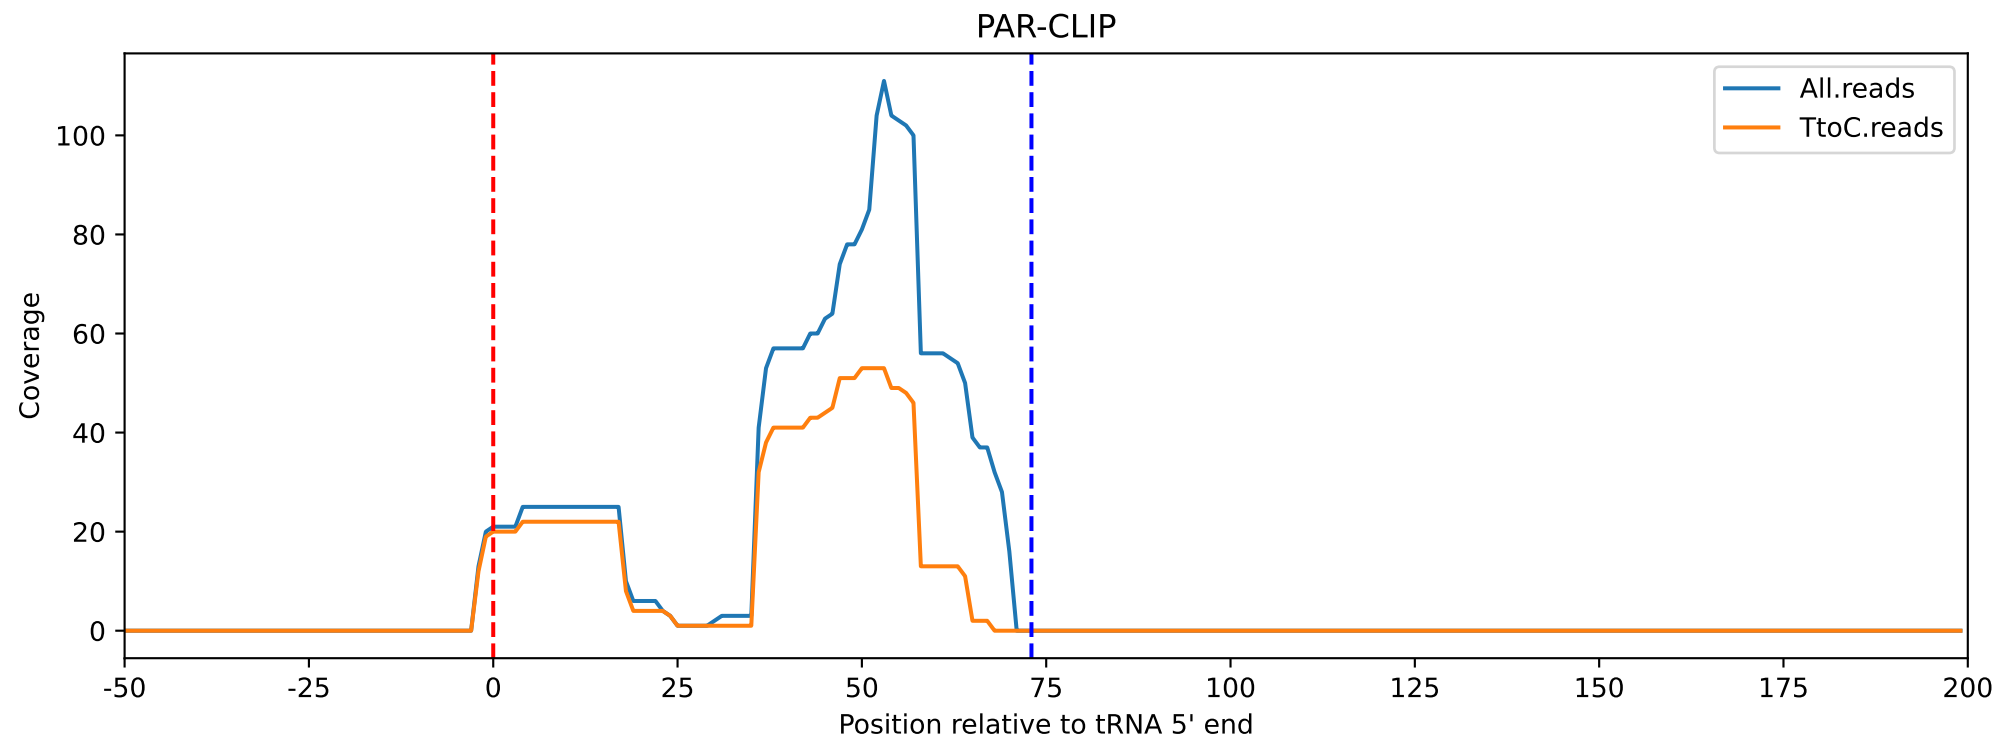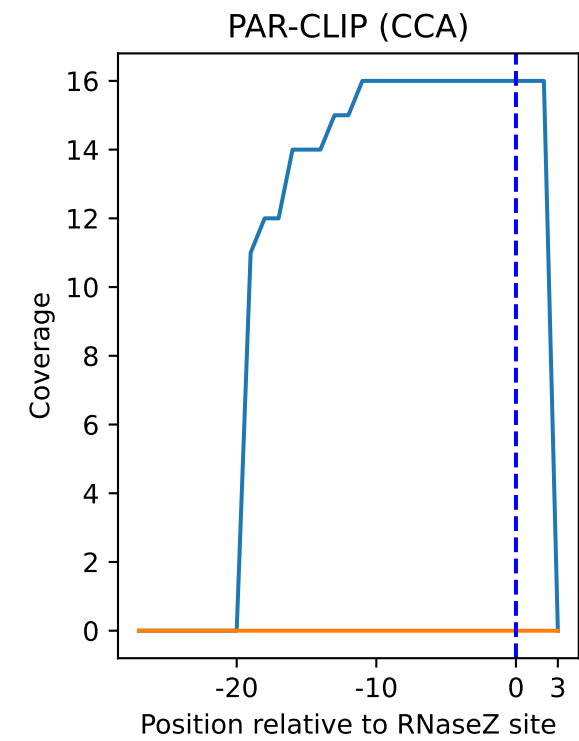

# tRNA-Tyr-GTA-1-2

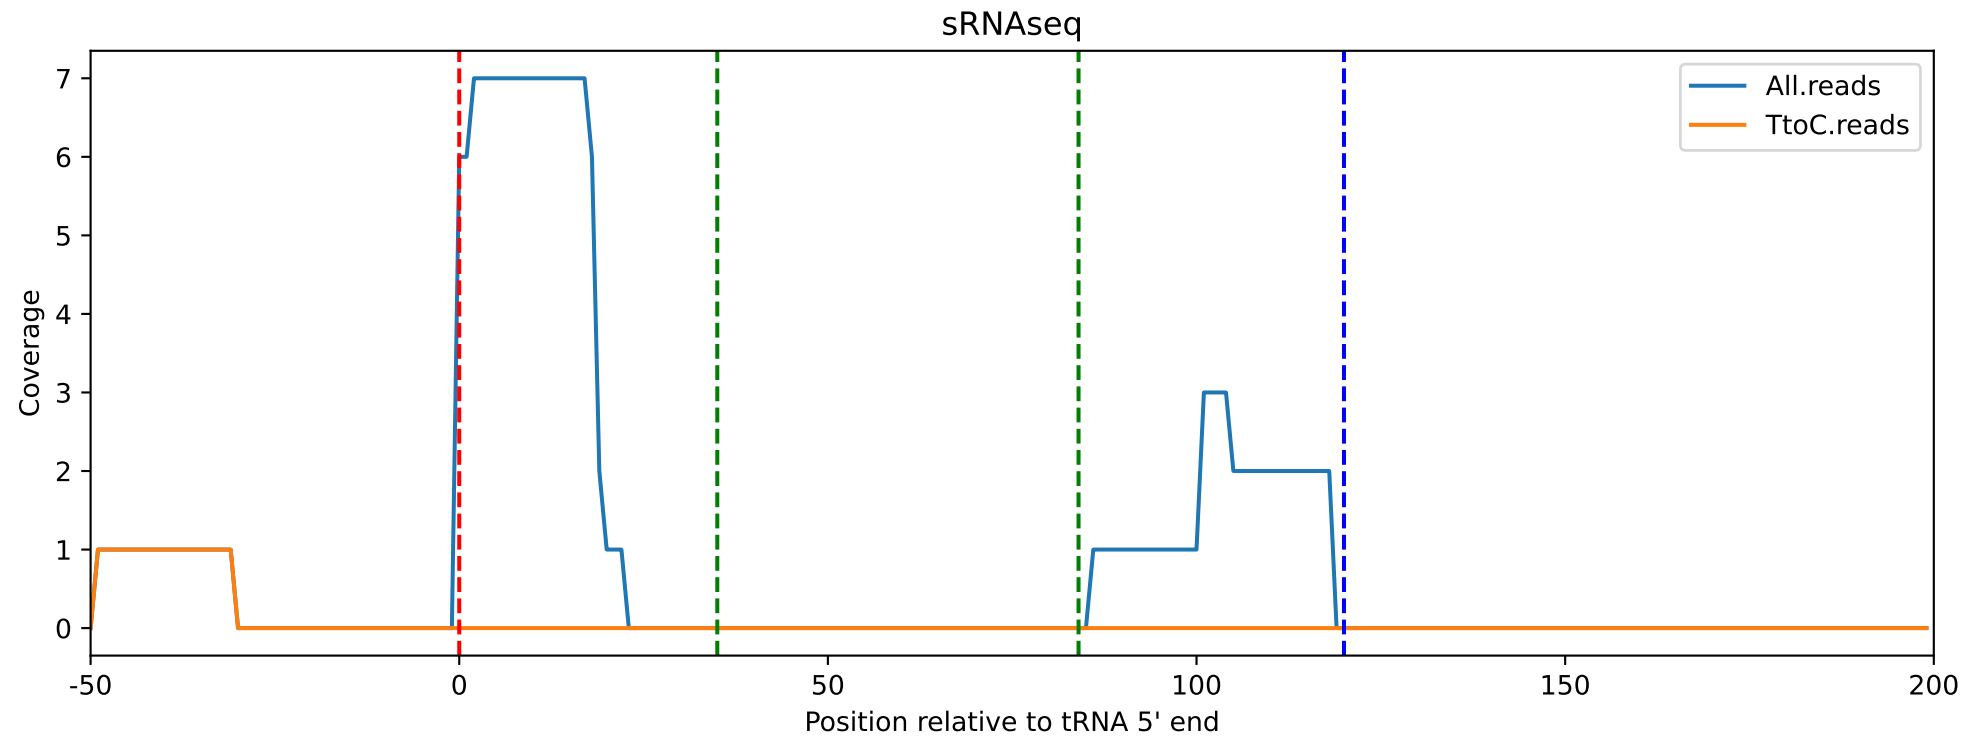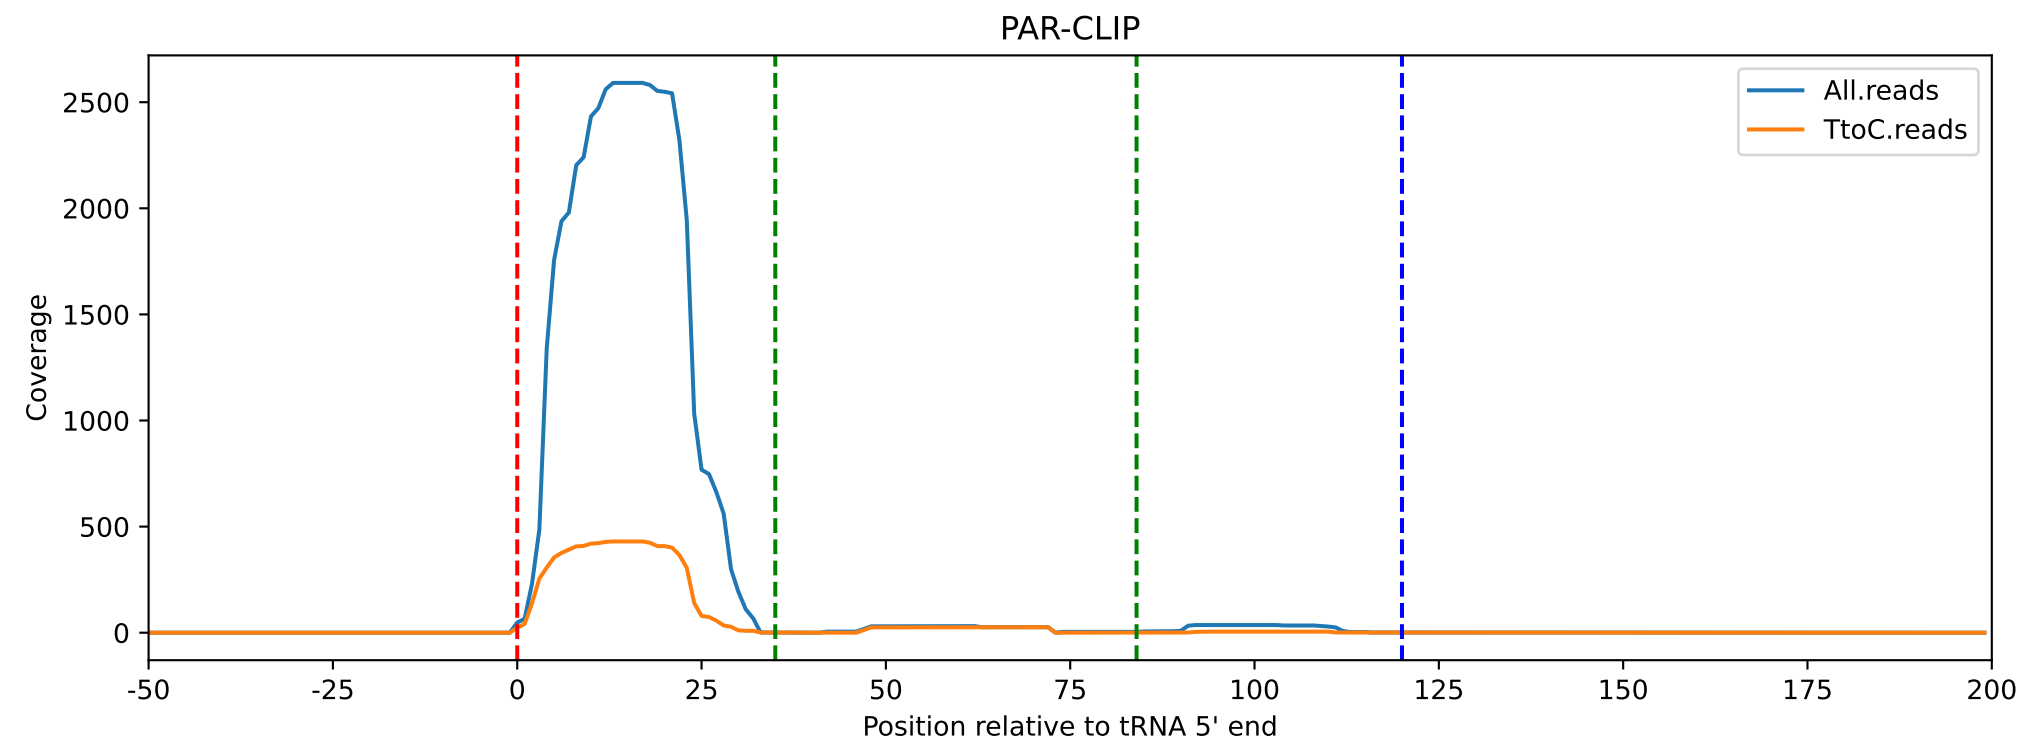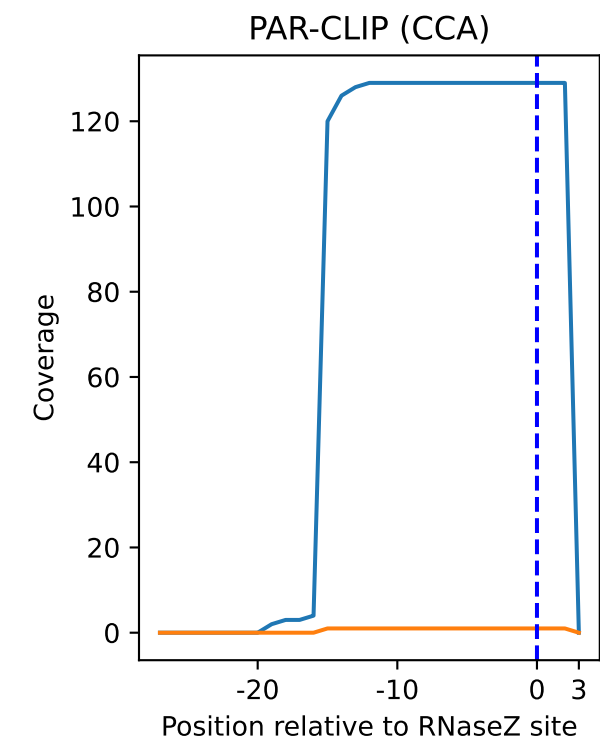

# tRNA-Tyr-GTA-1-9

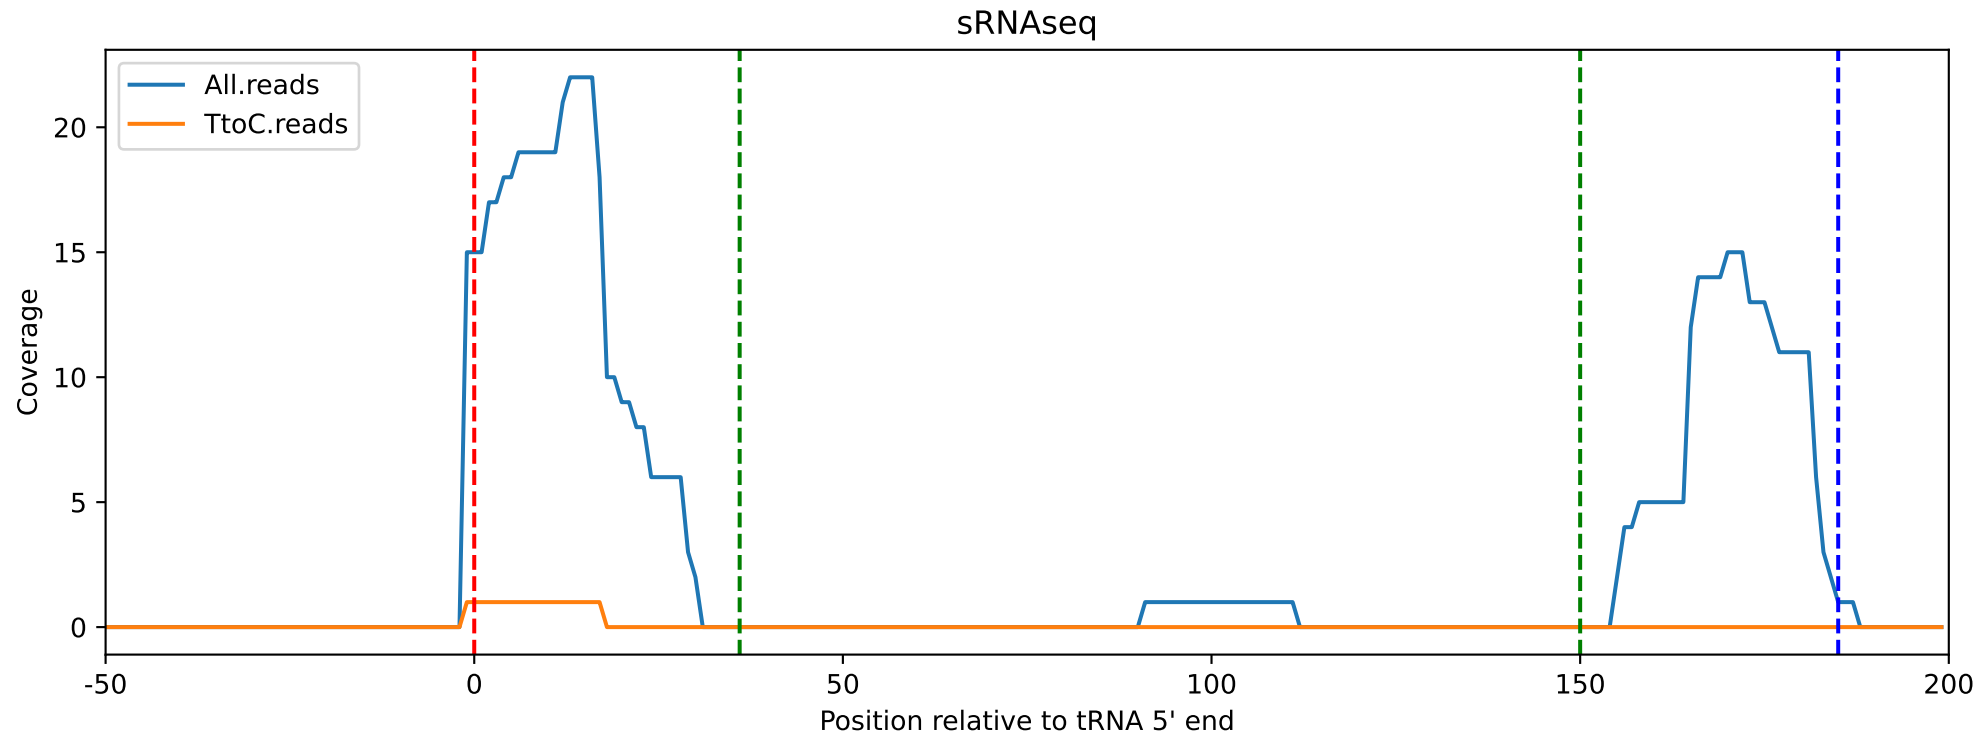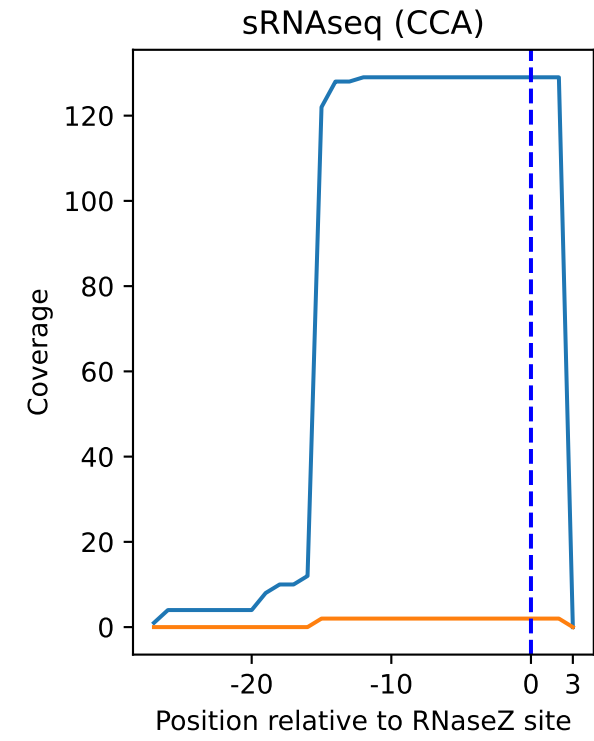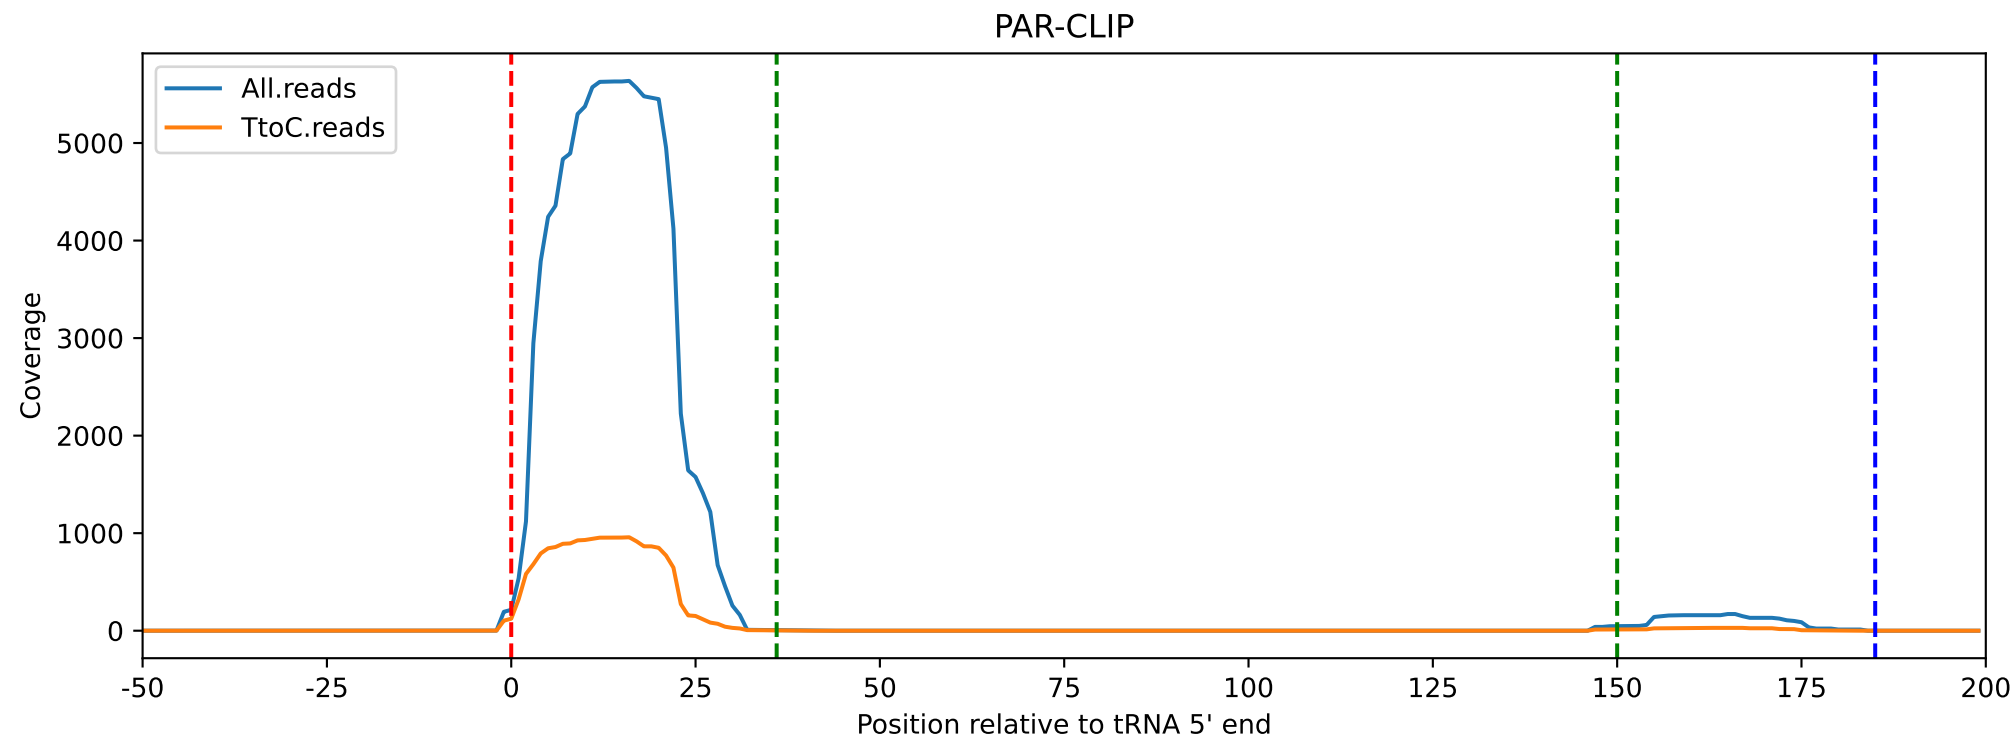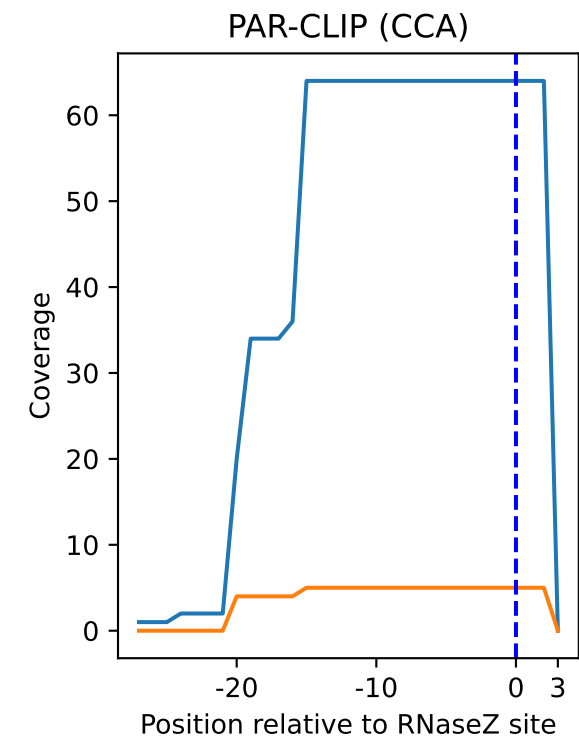

# tRNA-Pro-AGG-1-2

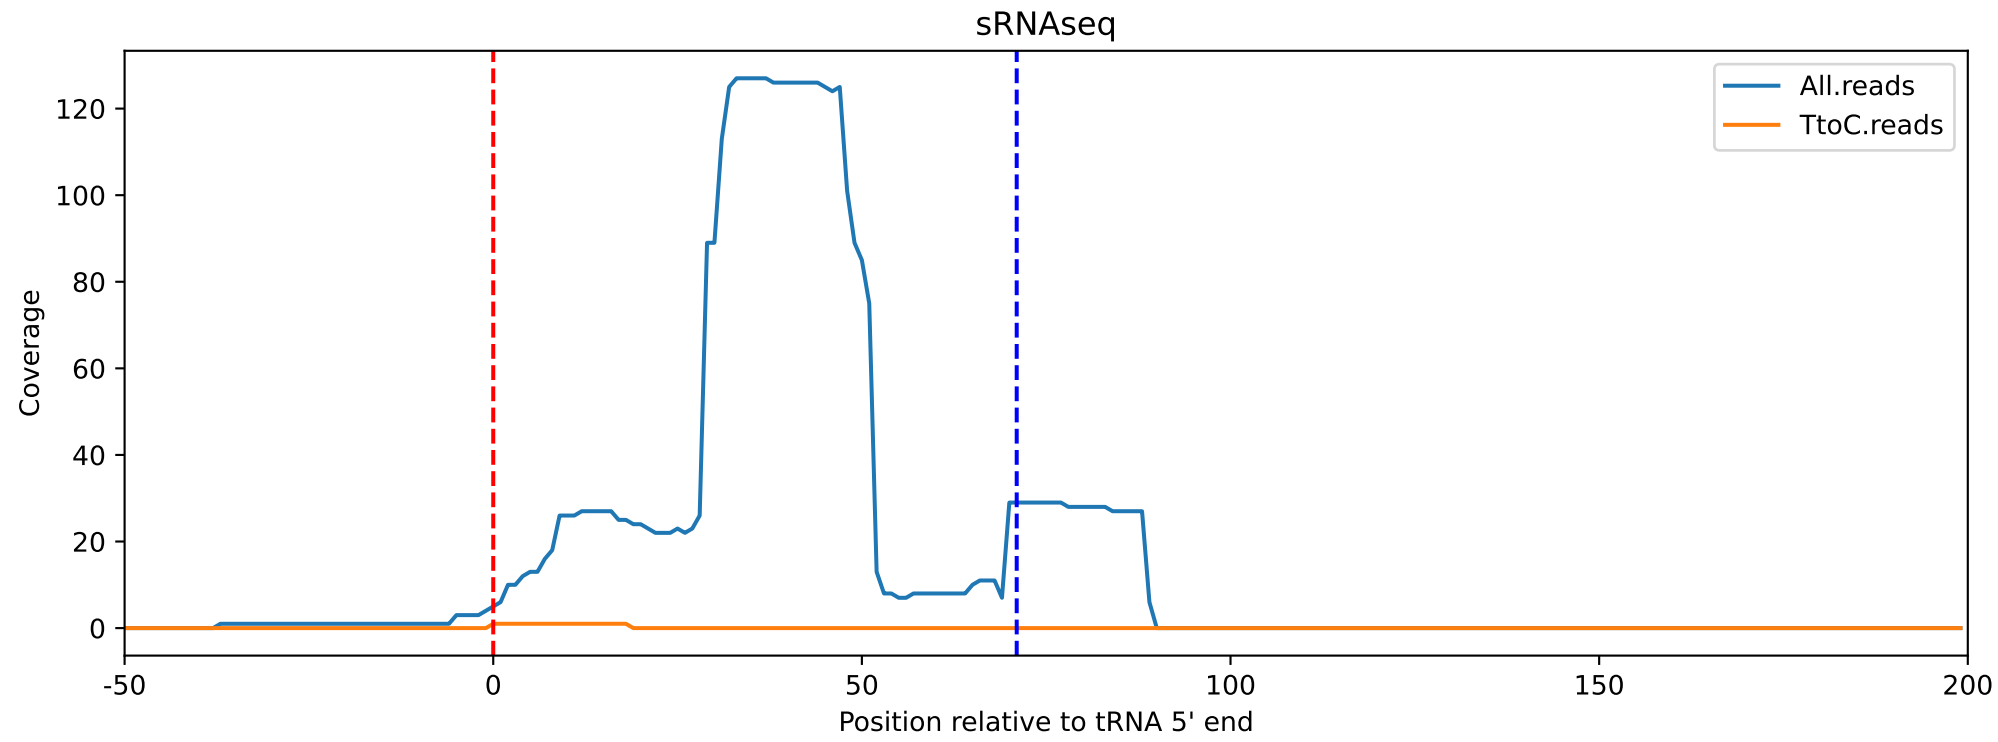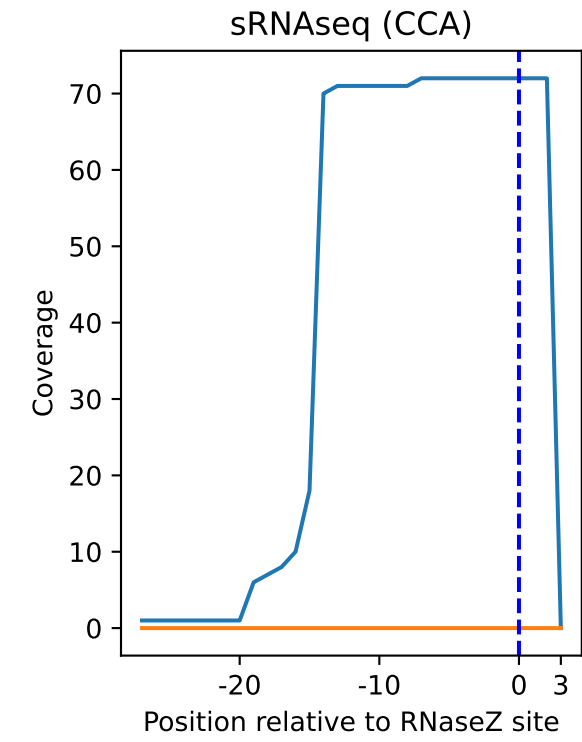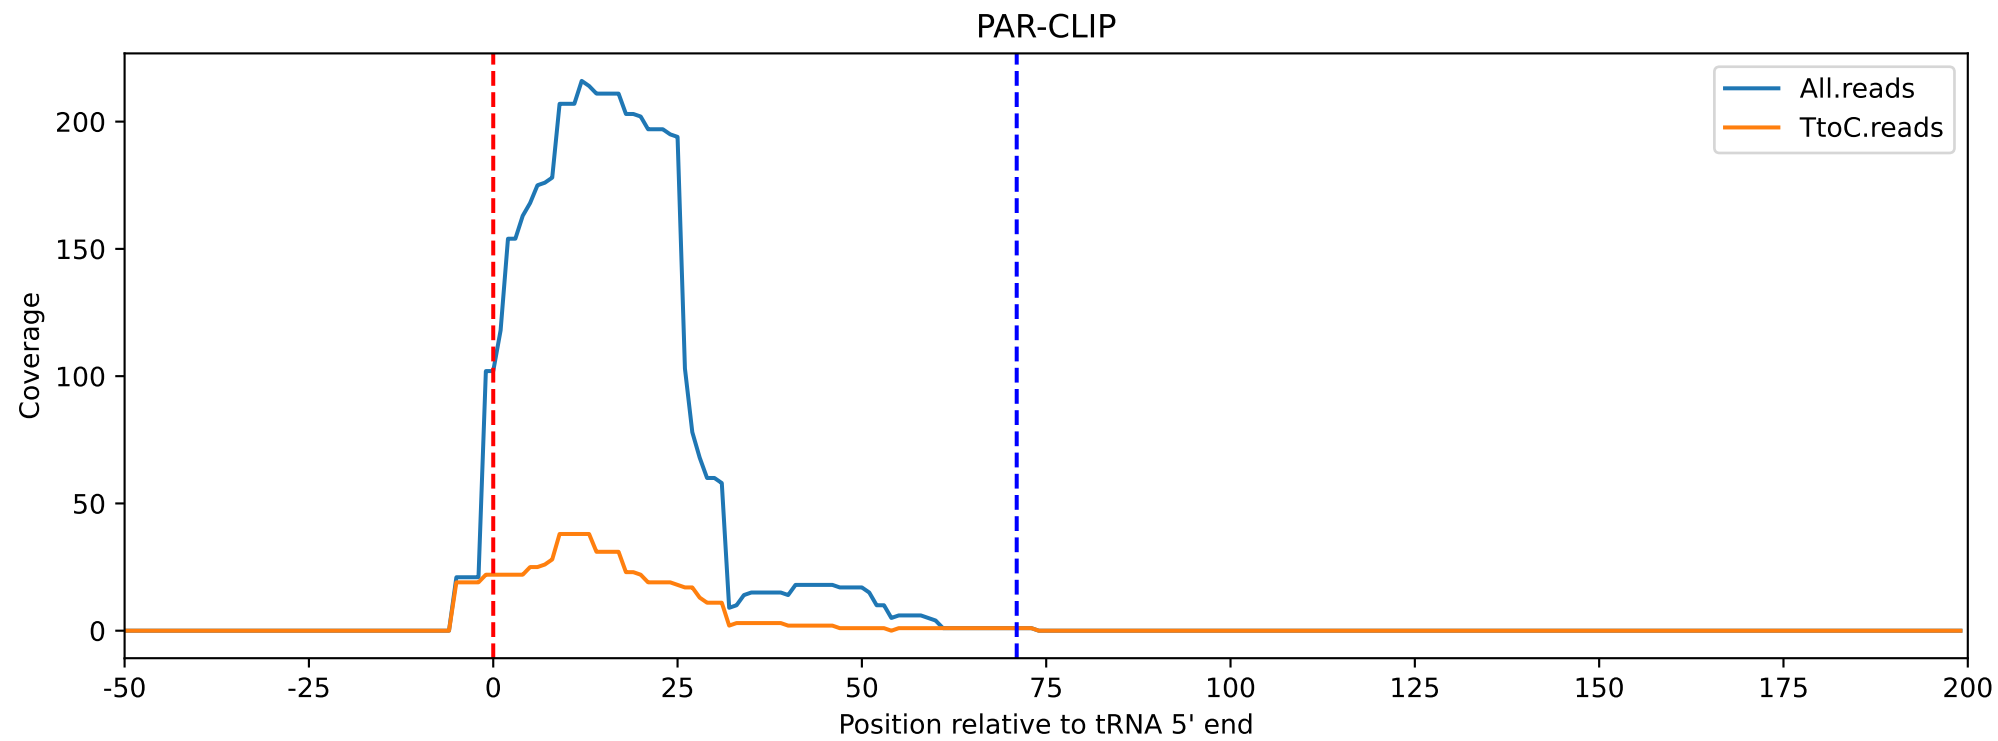



# tRNA-Ser-TGA-2-1

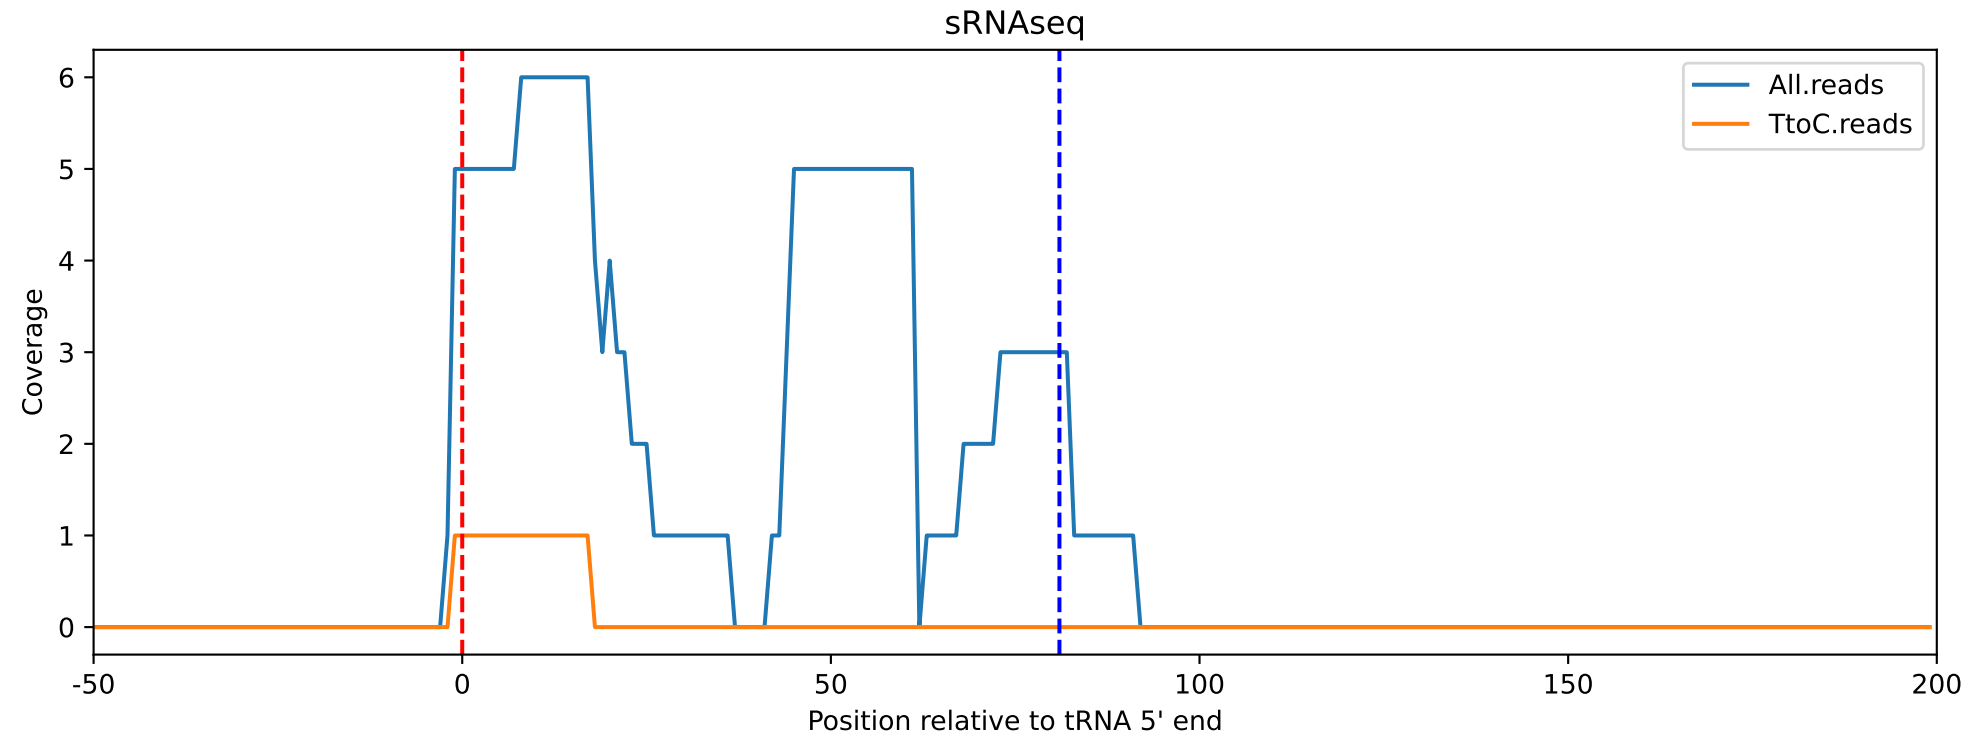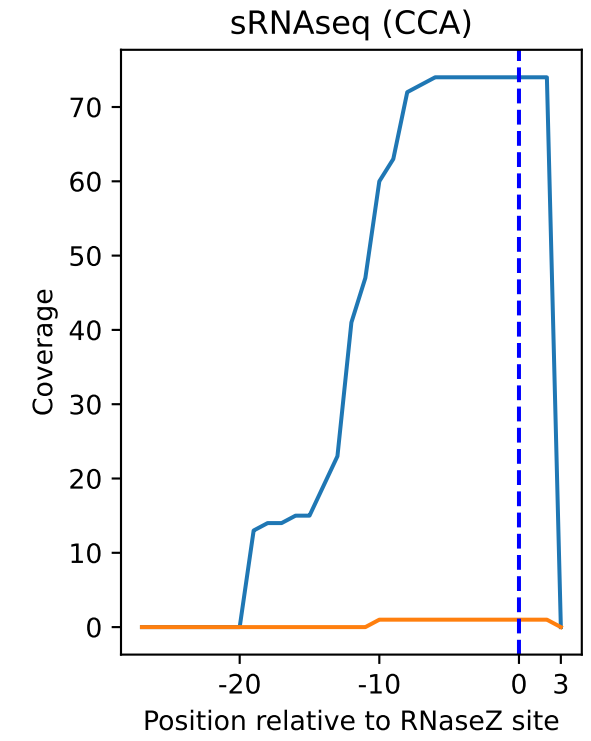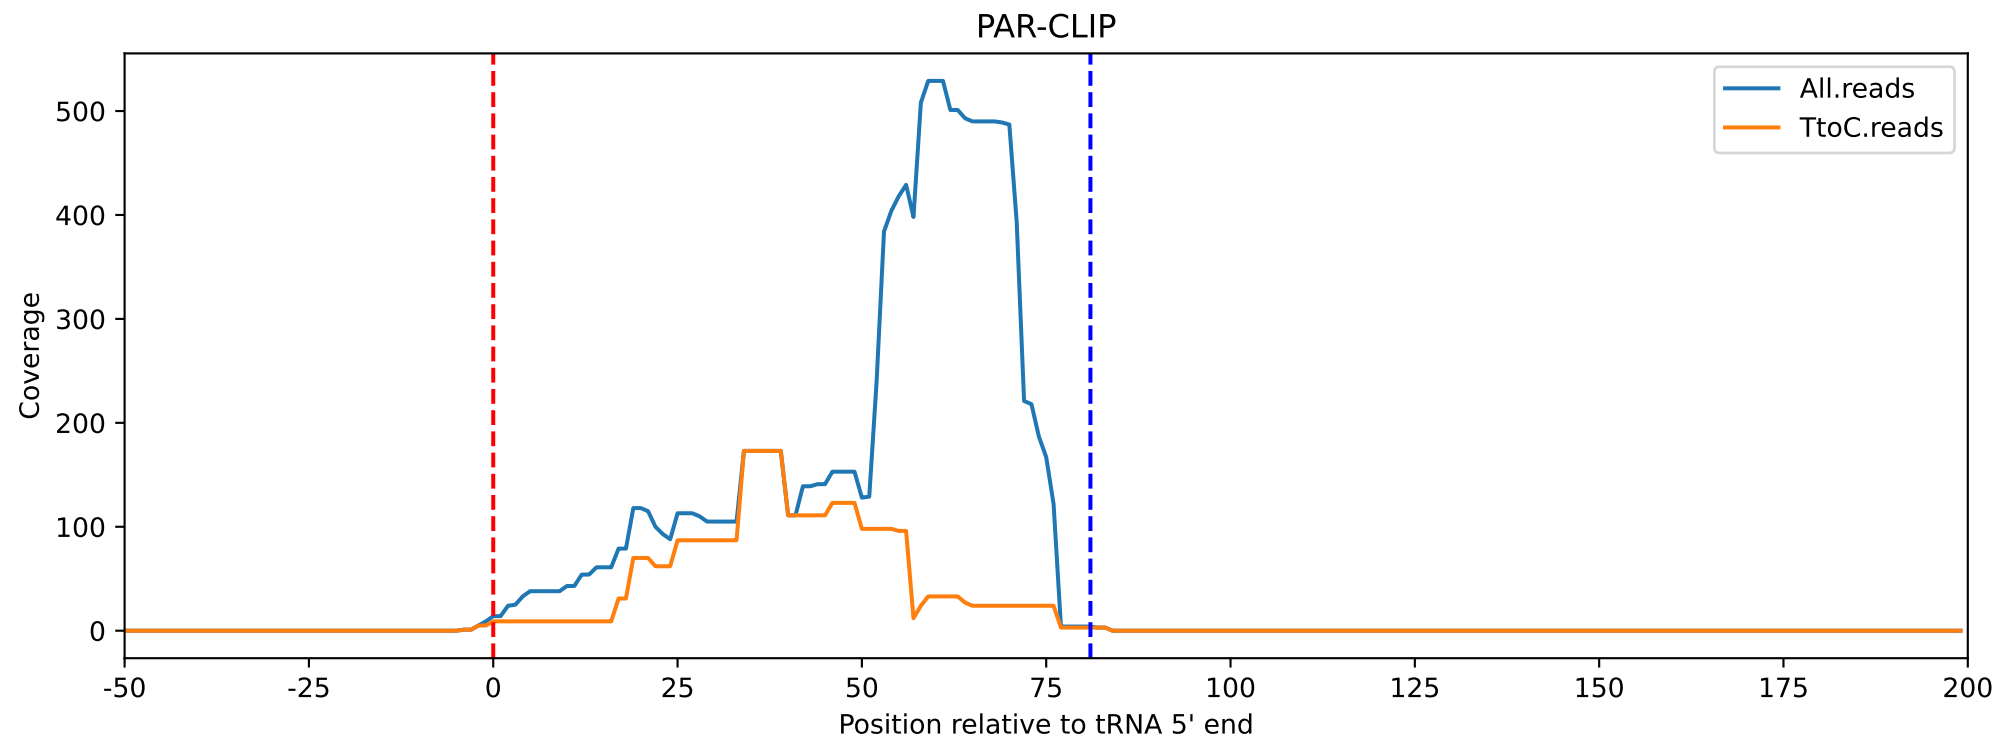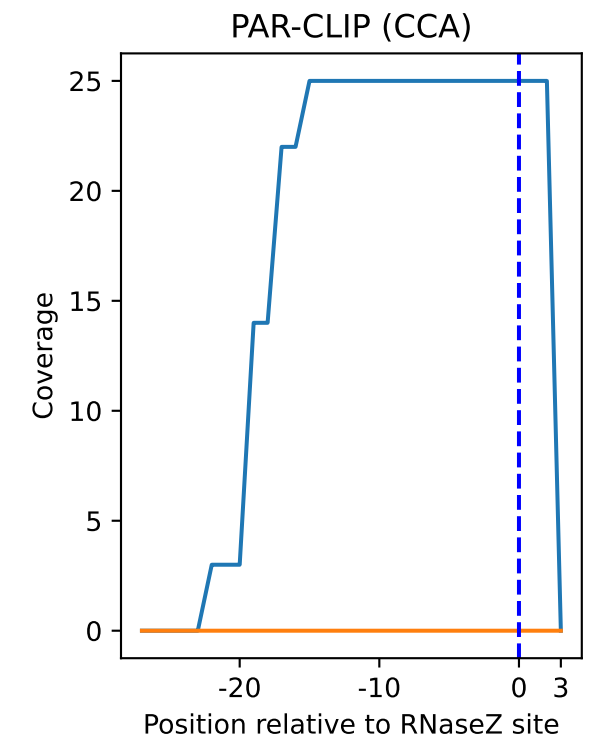

# tRNA-Arg-ACG-1-8

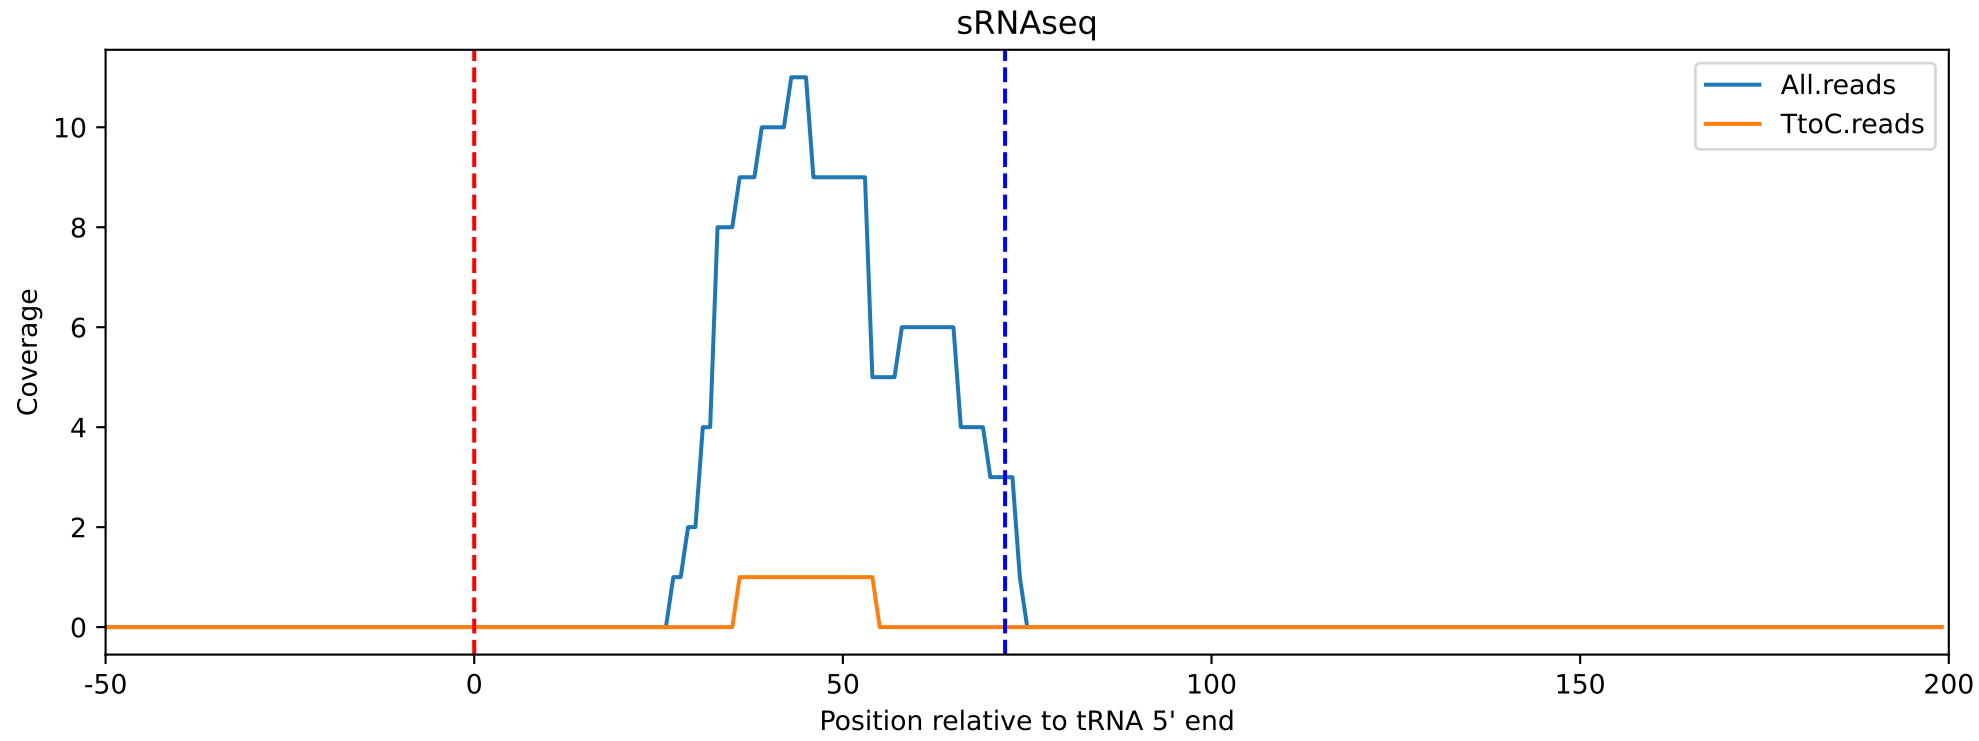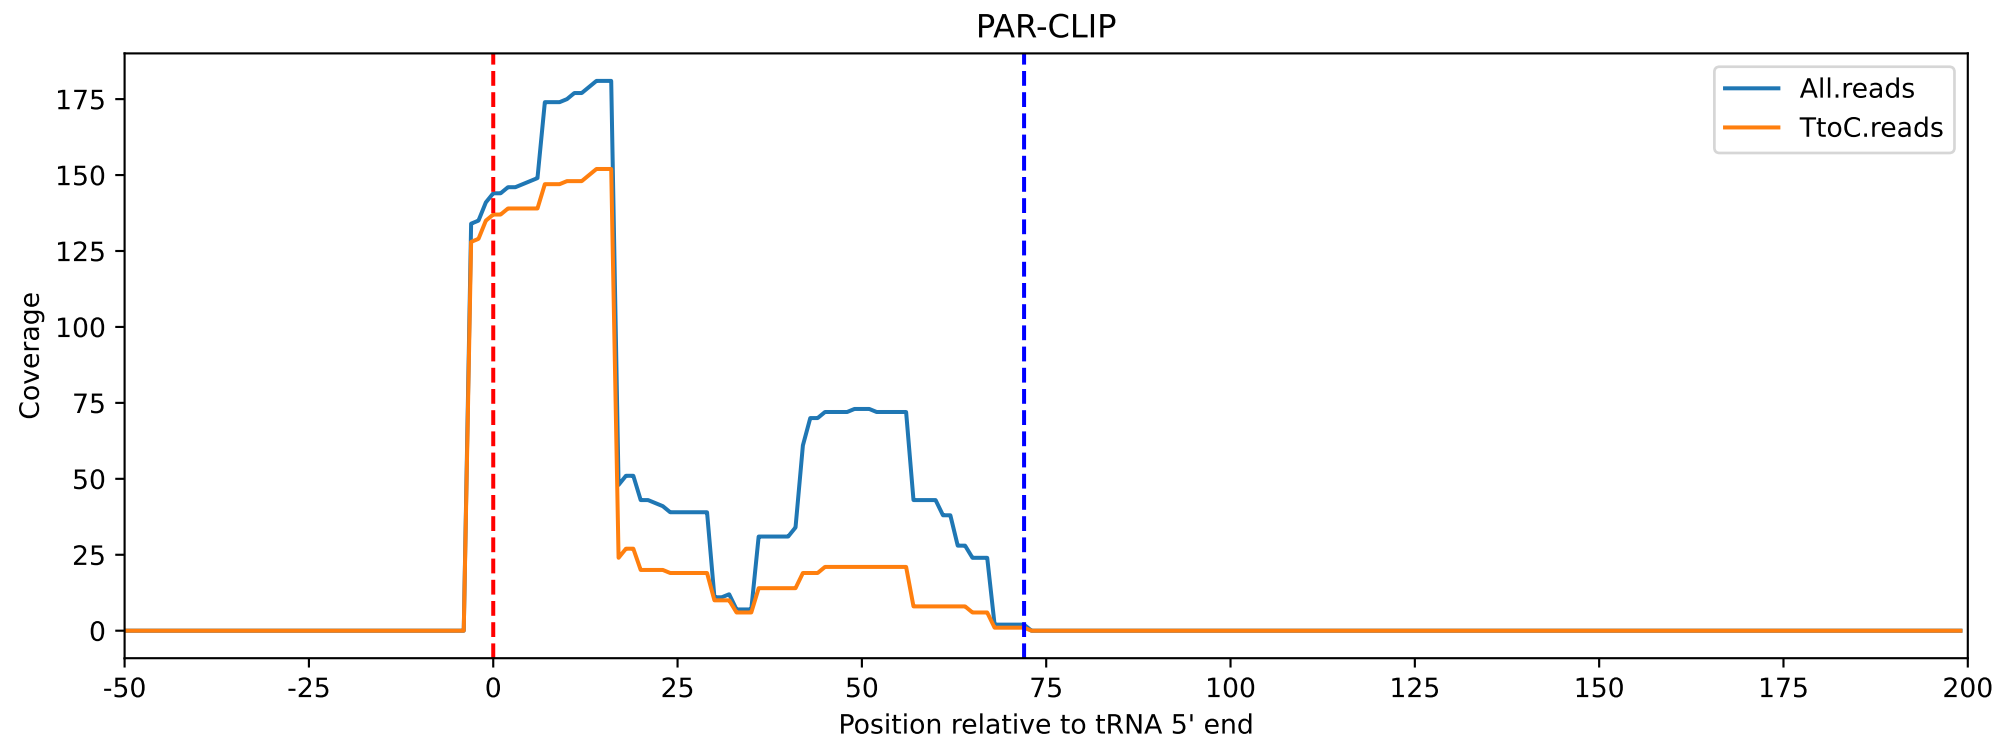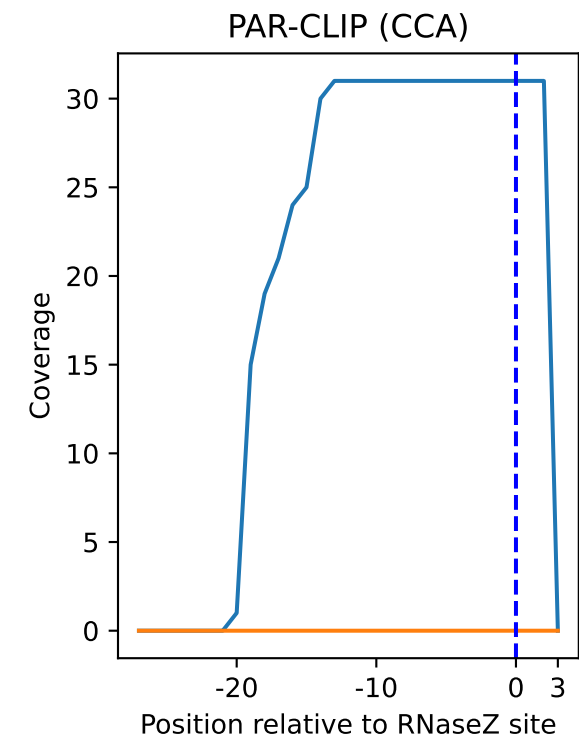

# tRNA-Tyr-GTA-1-4

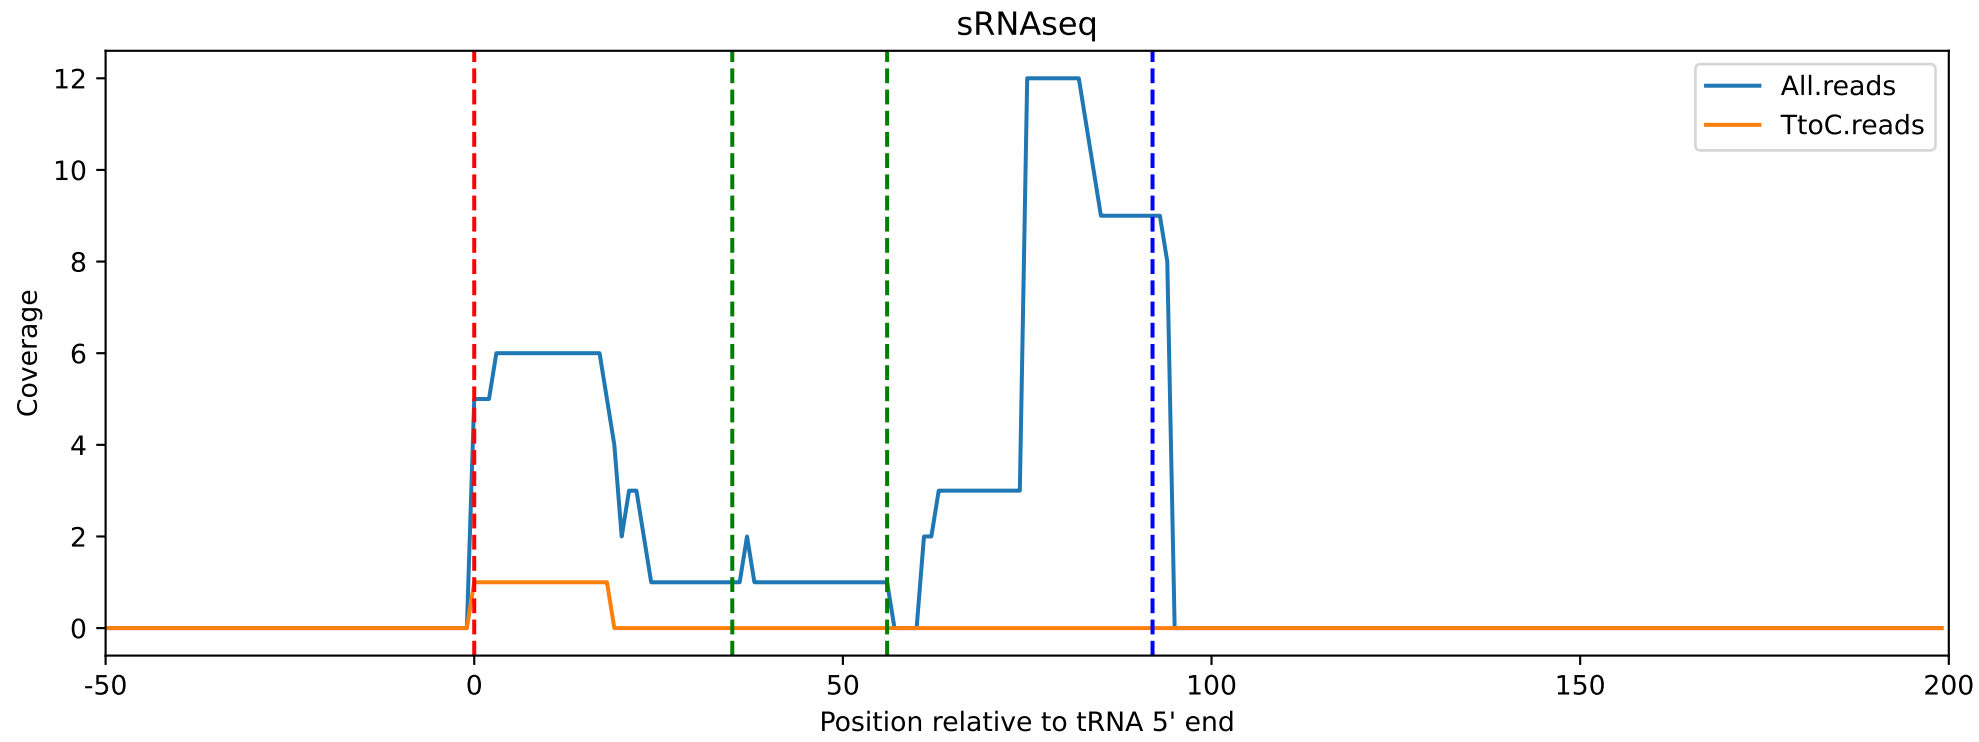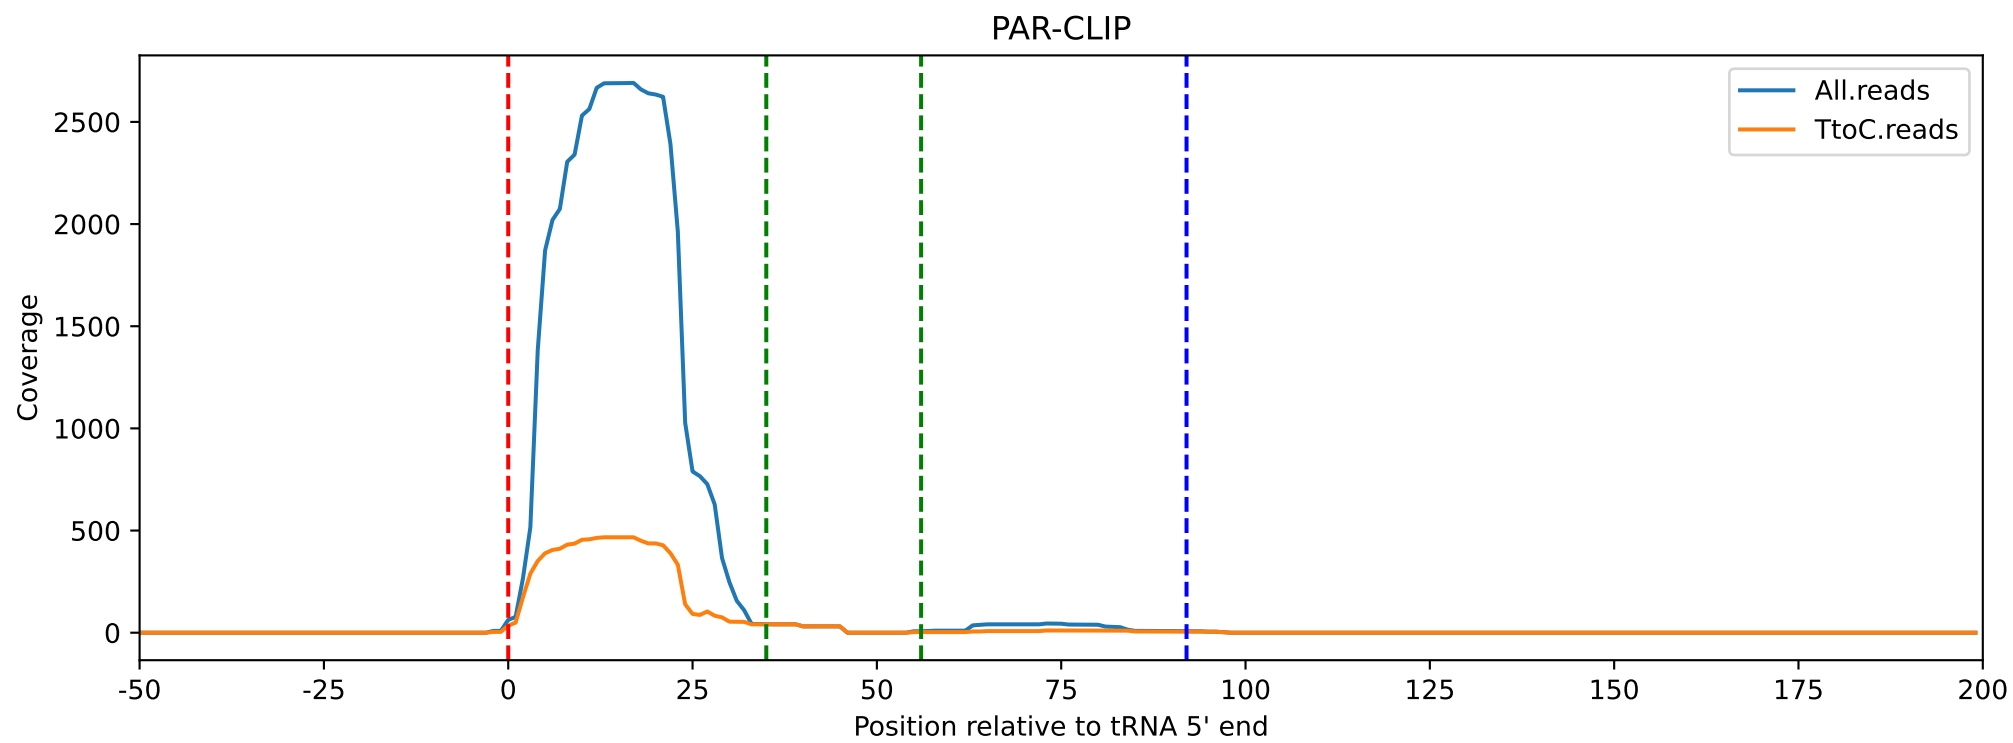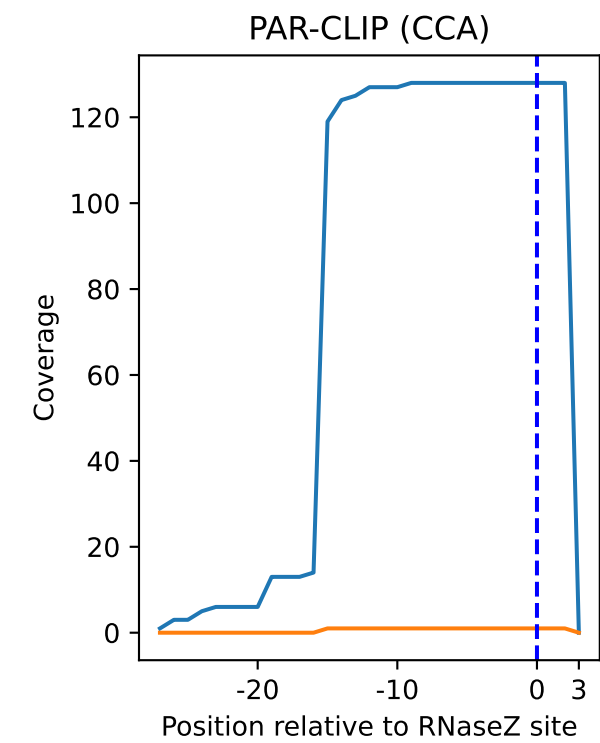

# tRNA-Tyr-GTA-1-3

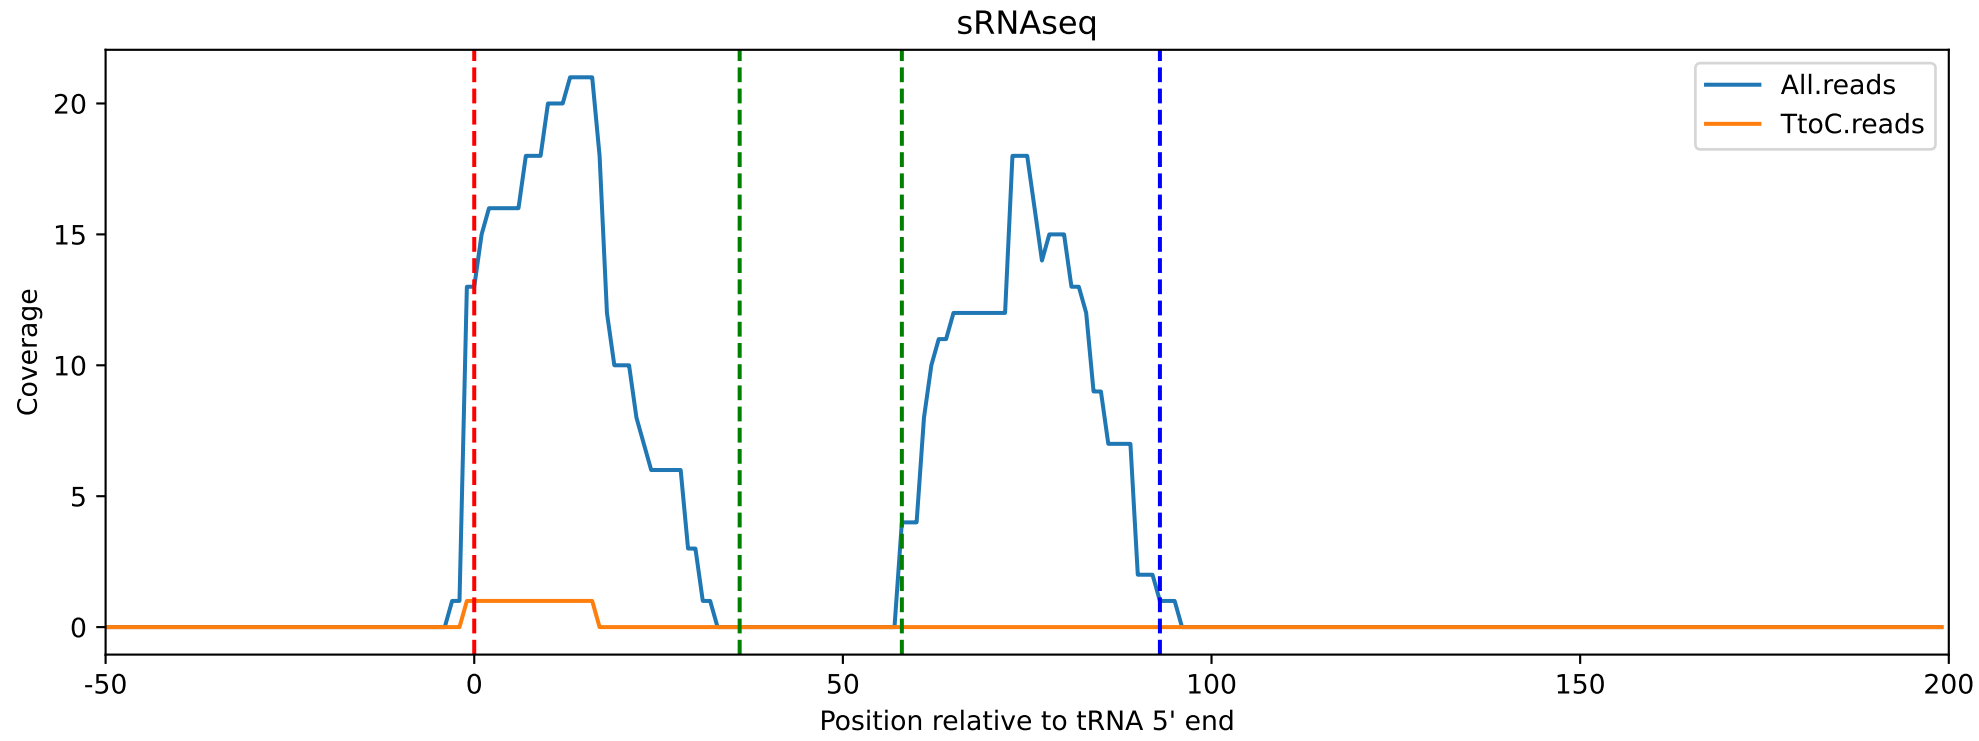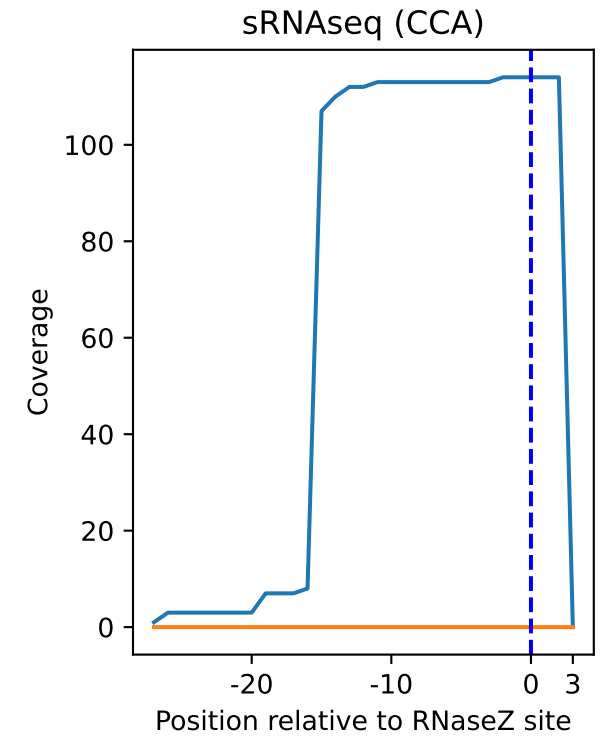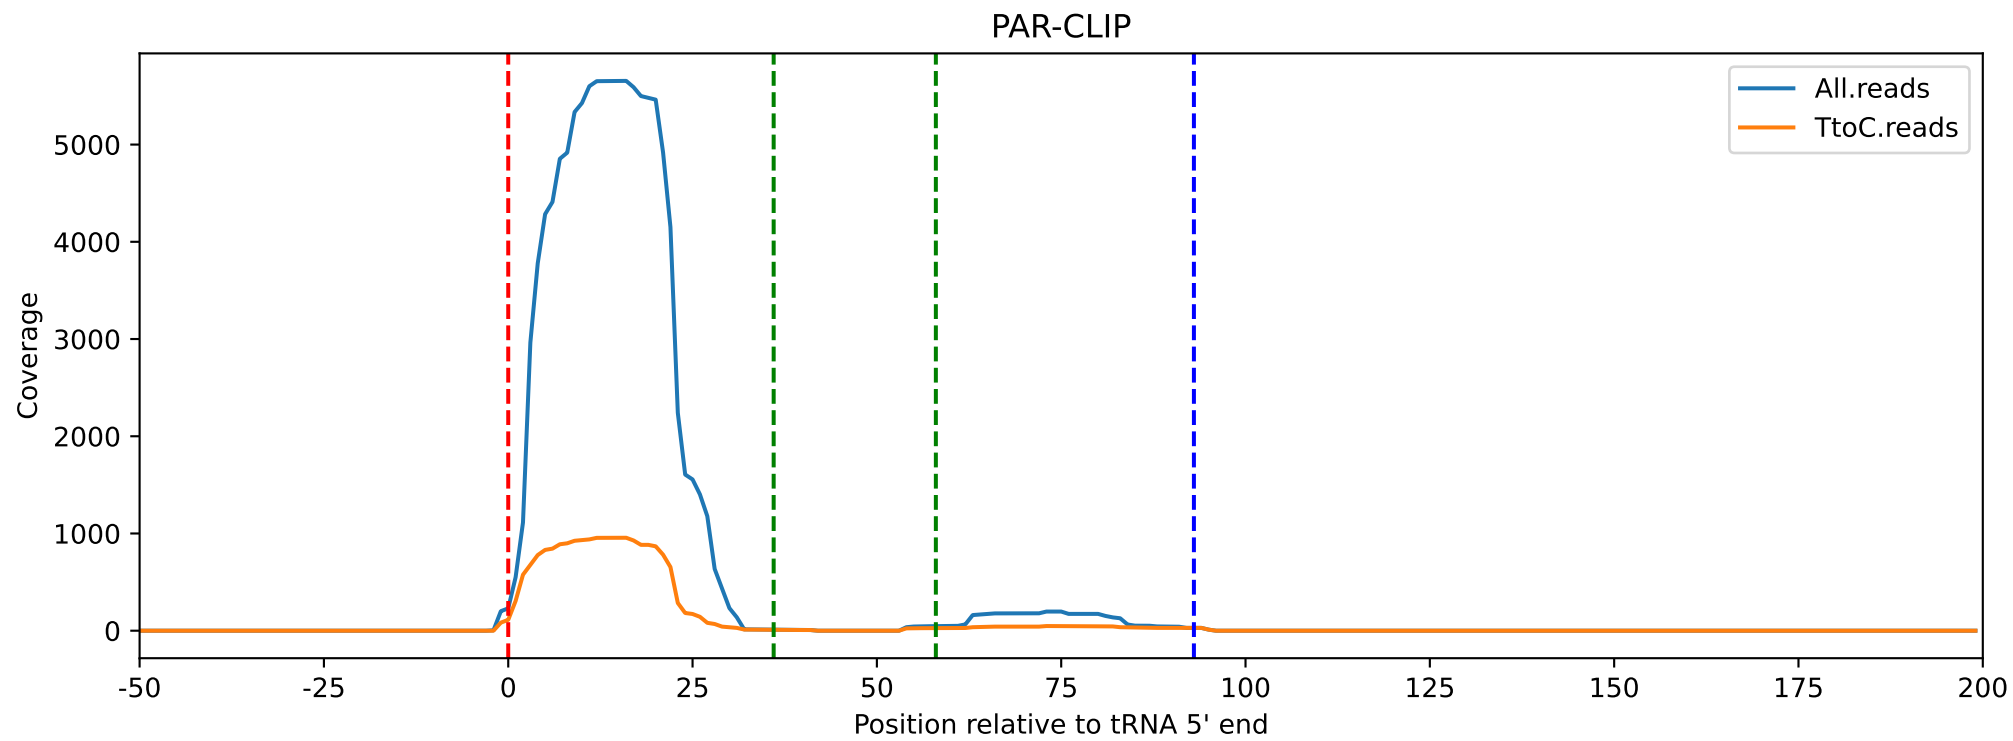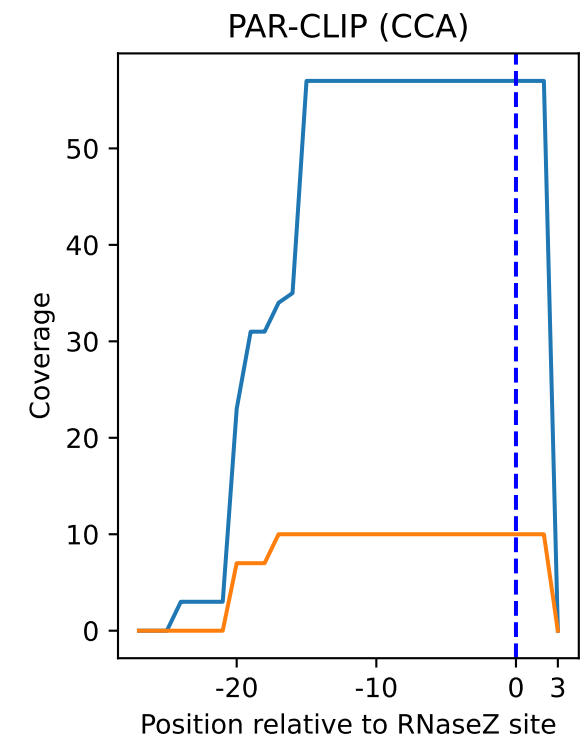

# tRNA-Arg-ACG-1-3

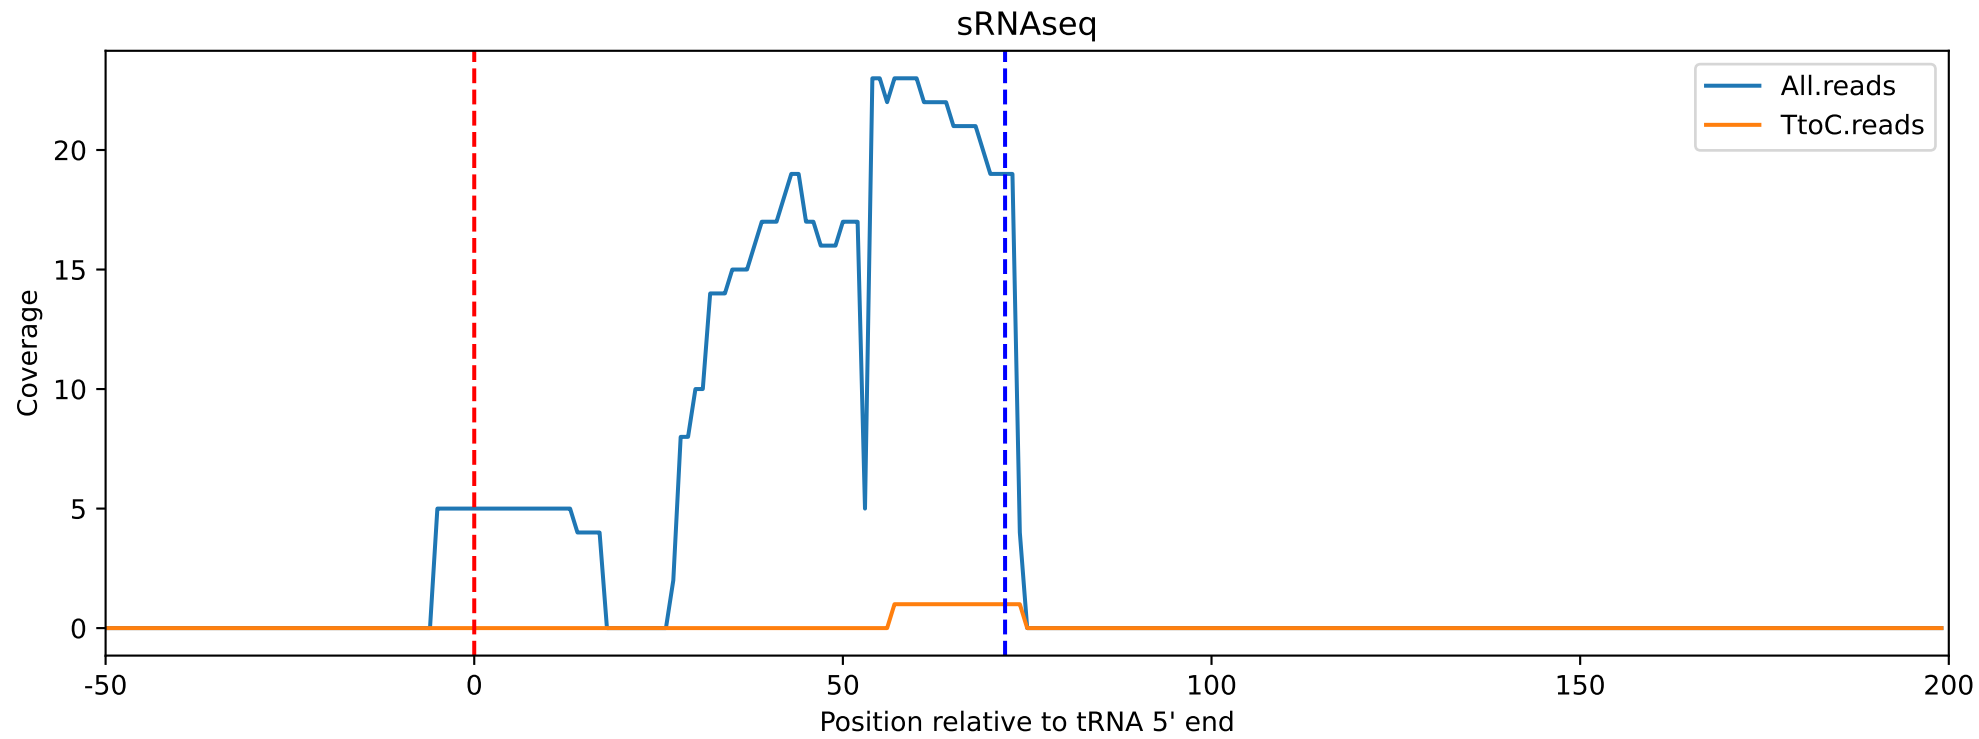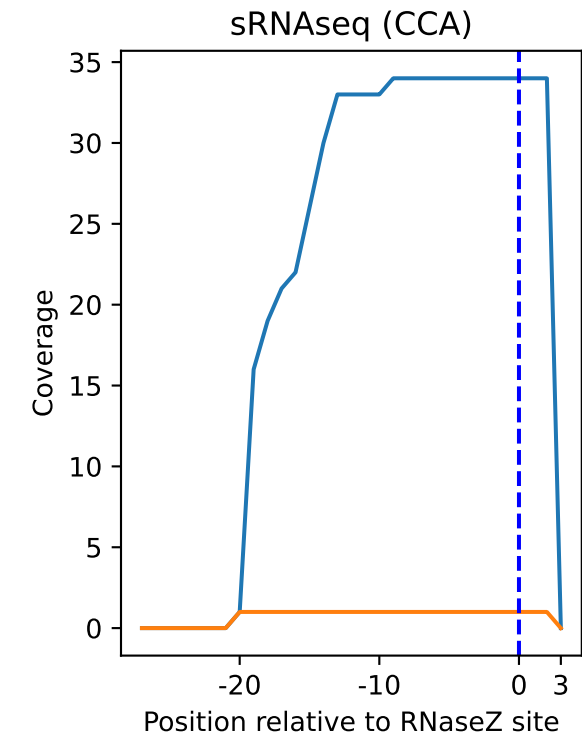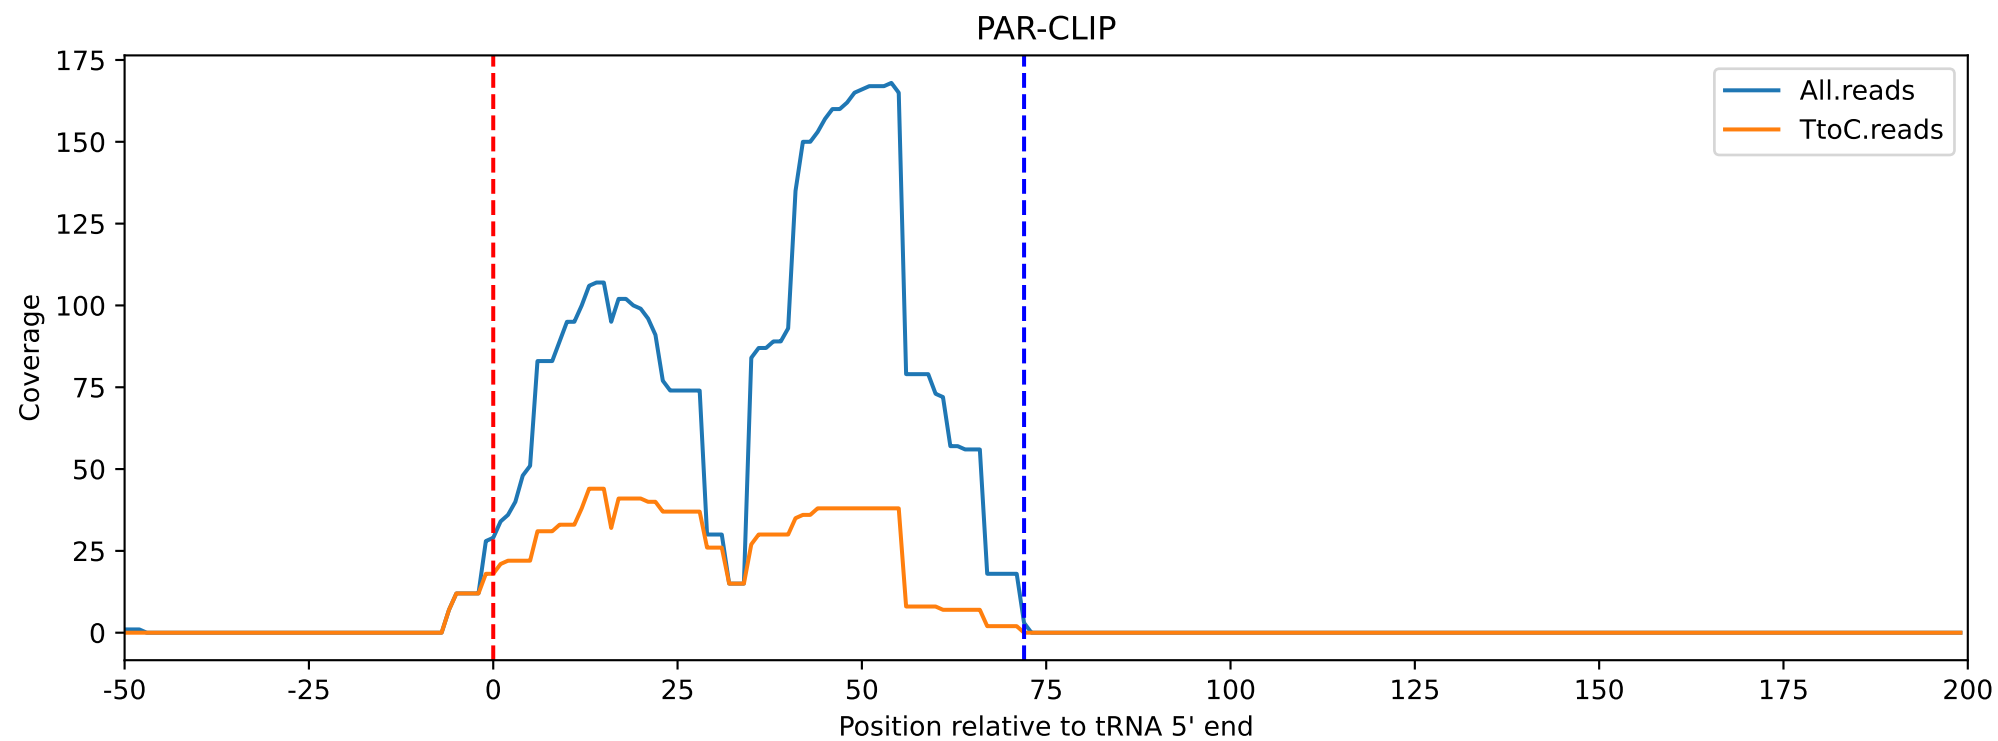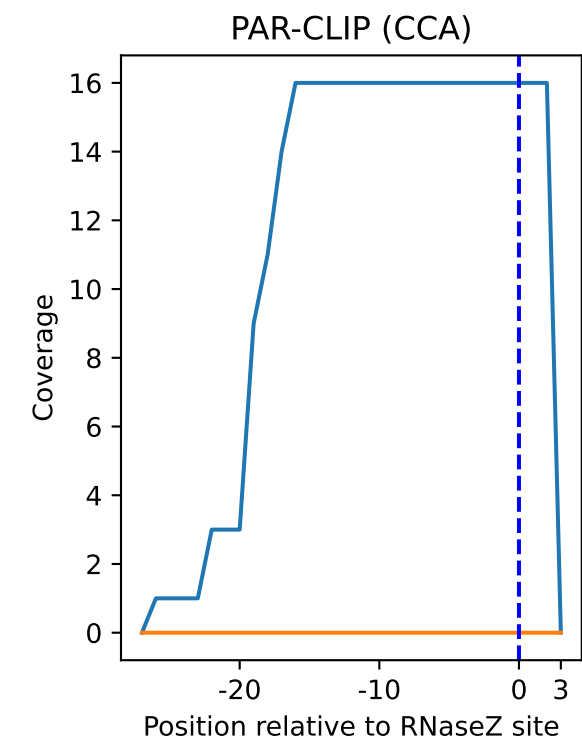

# tRNA-Gln-CTG-1-1

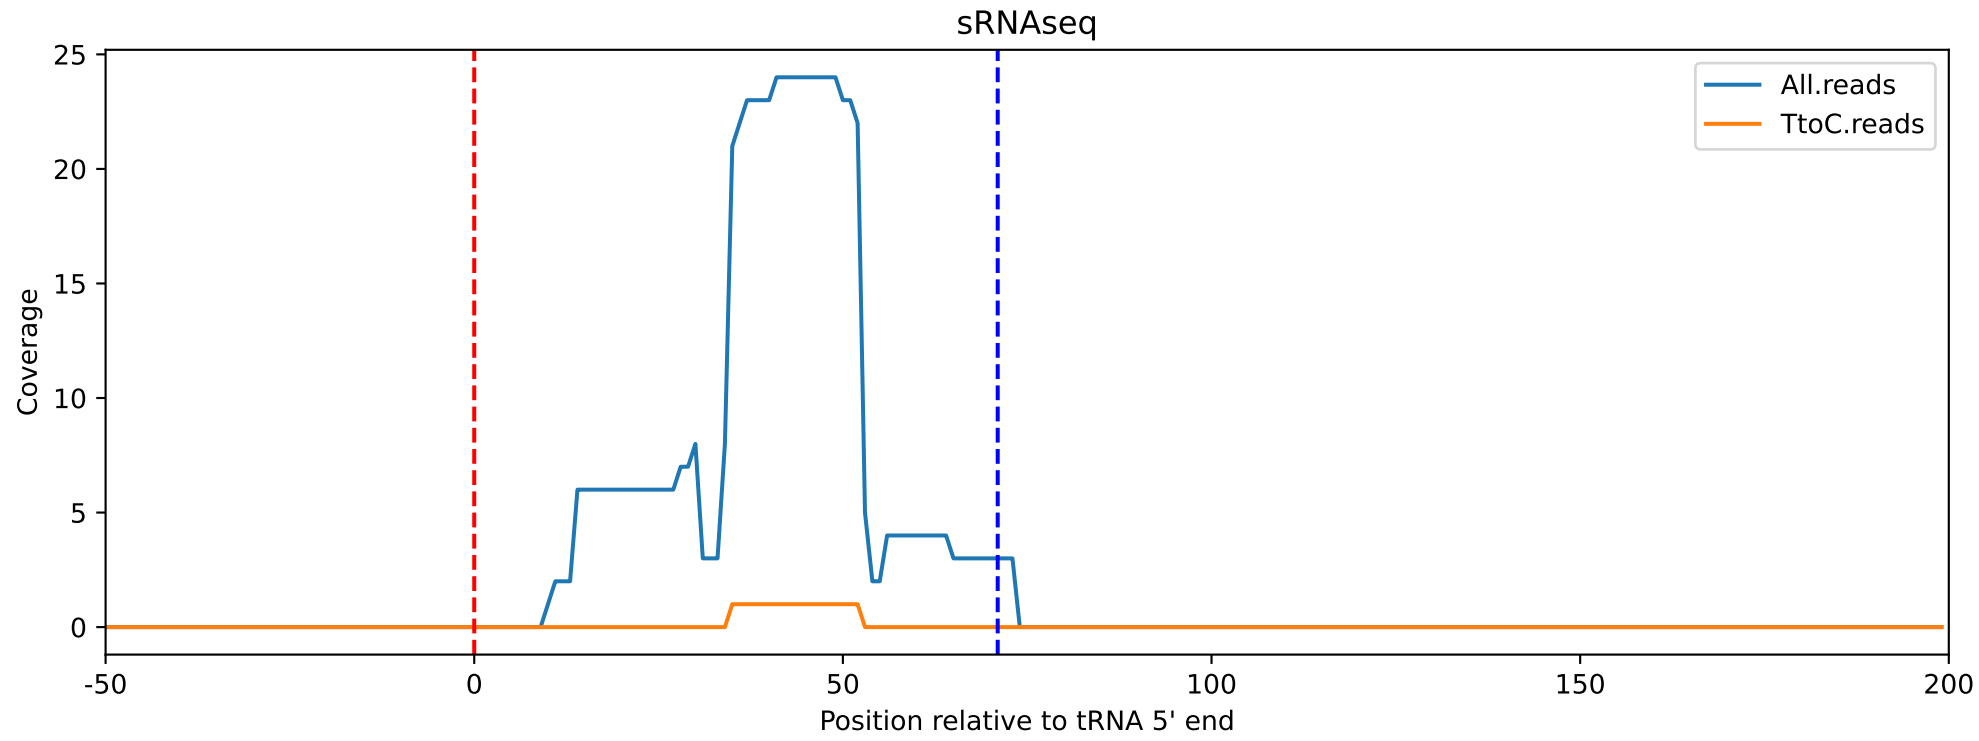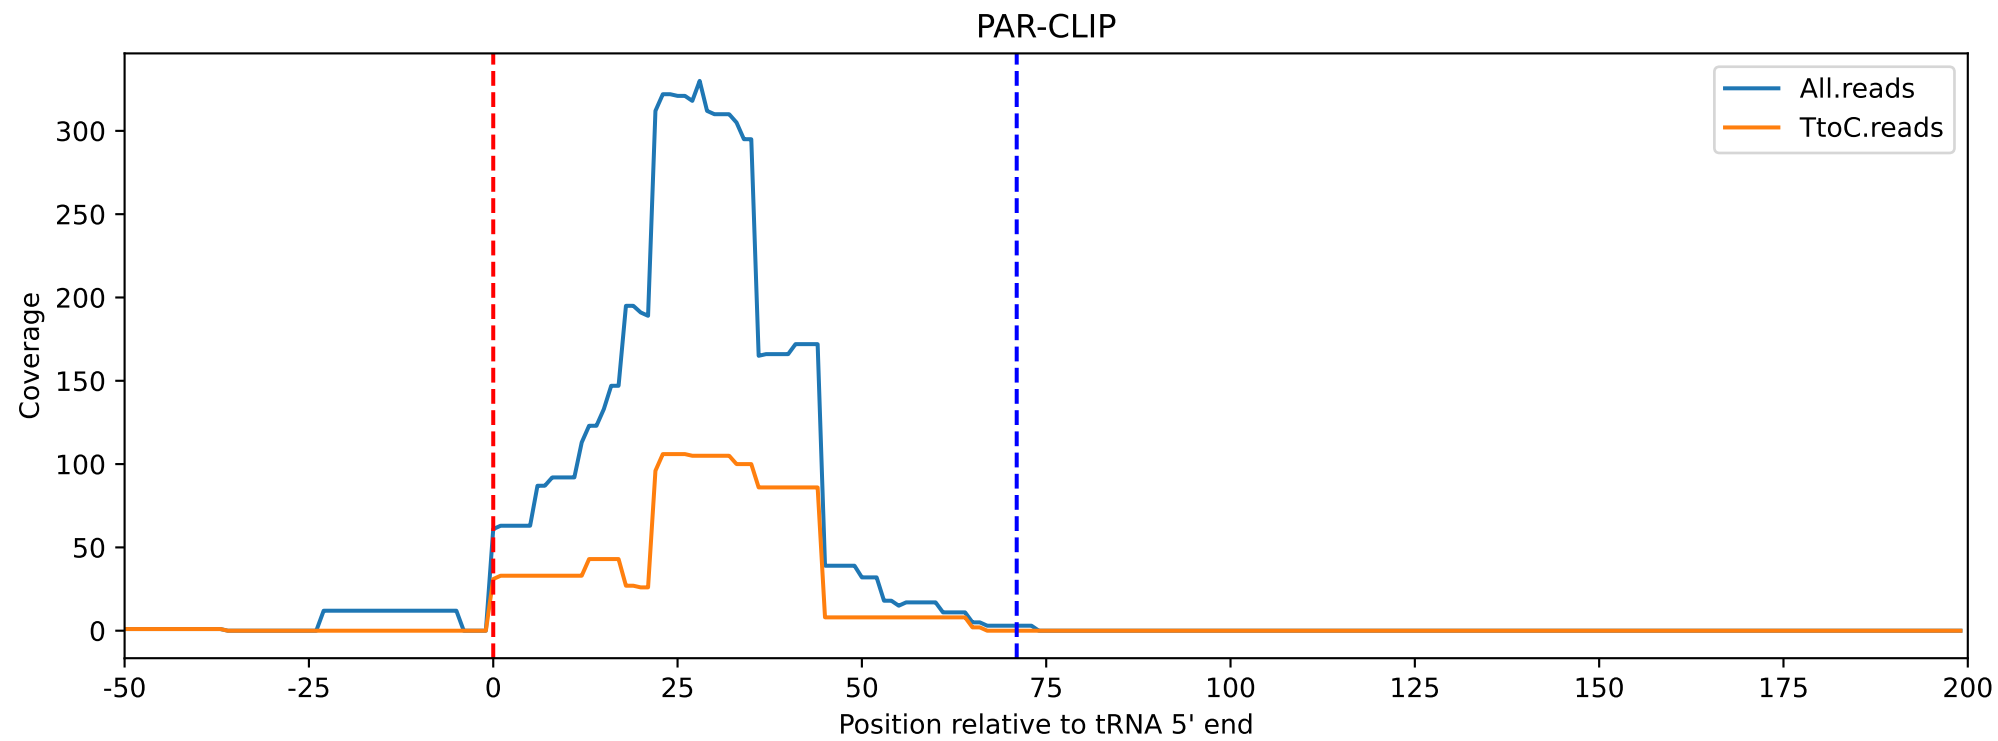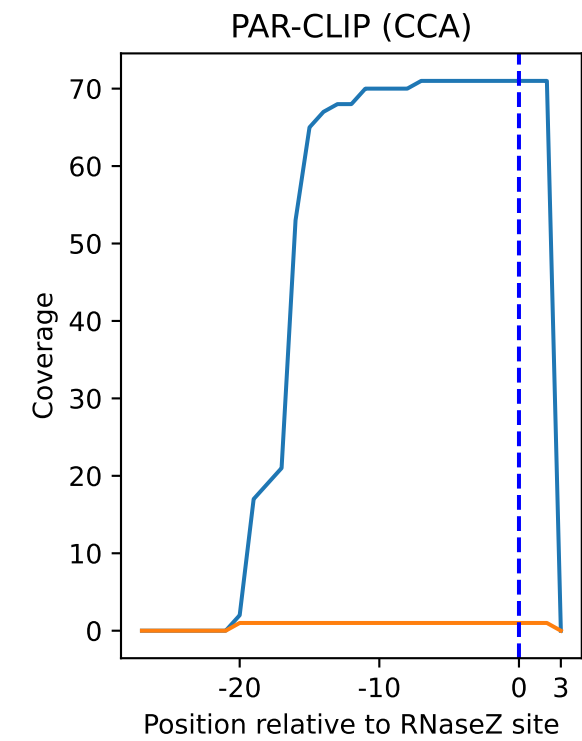

# tRNA-Ser-GCT-2-3

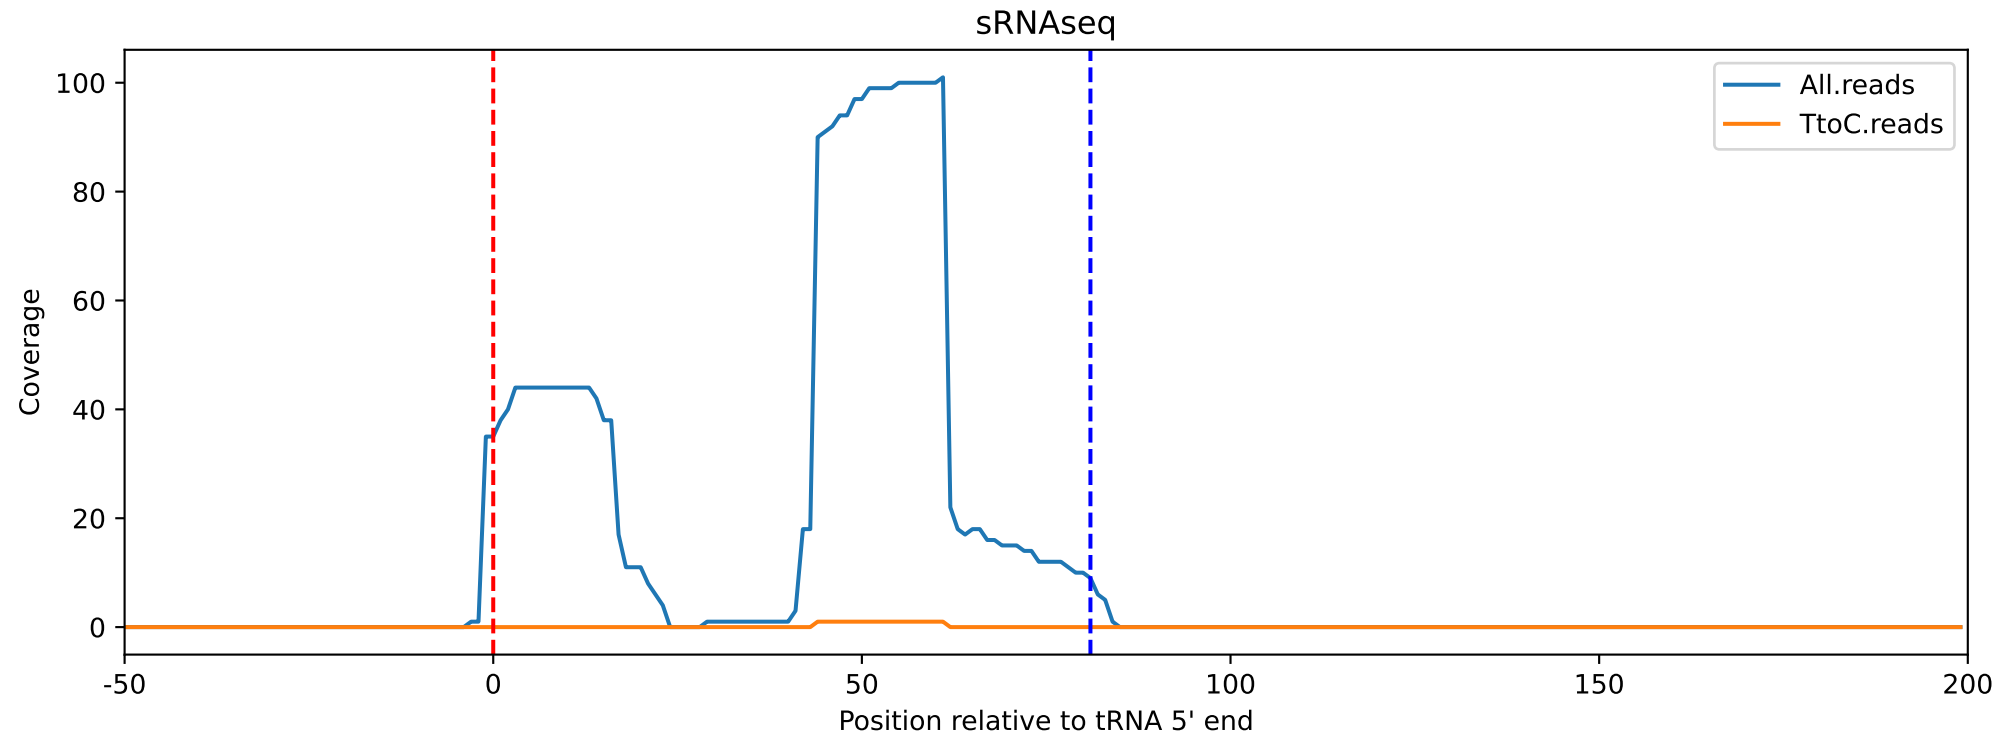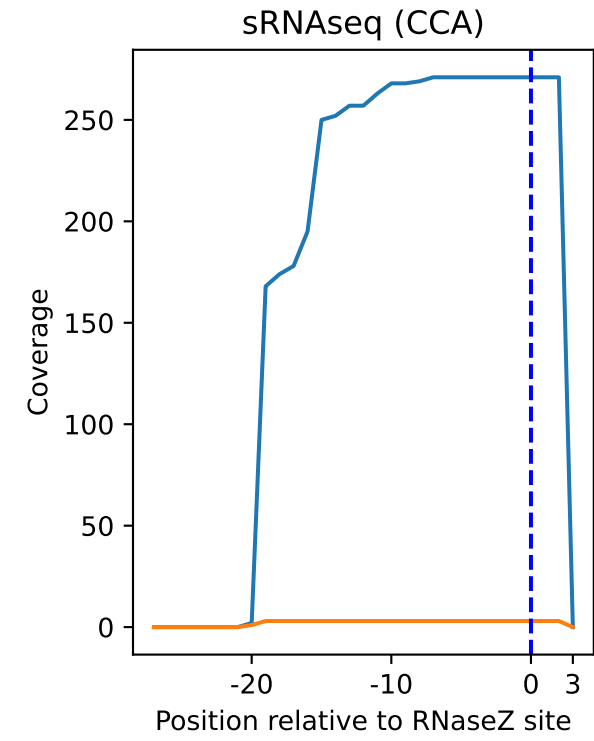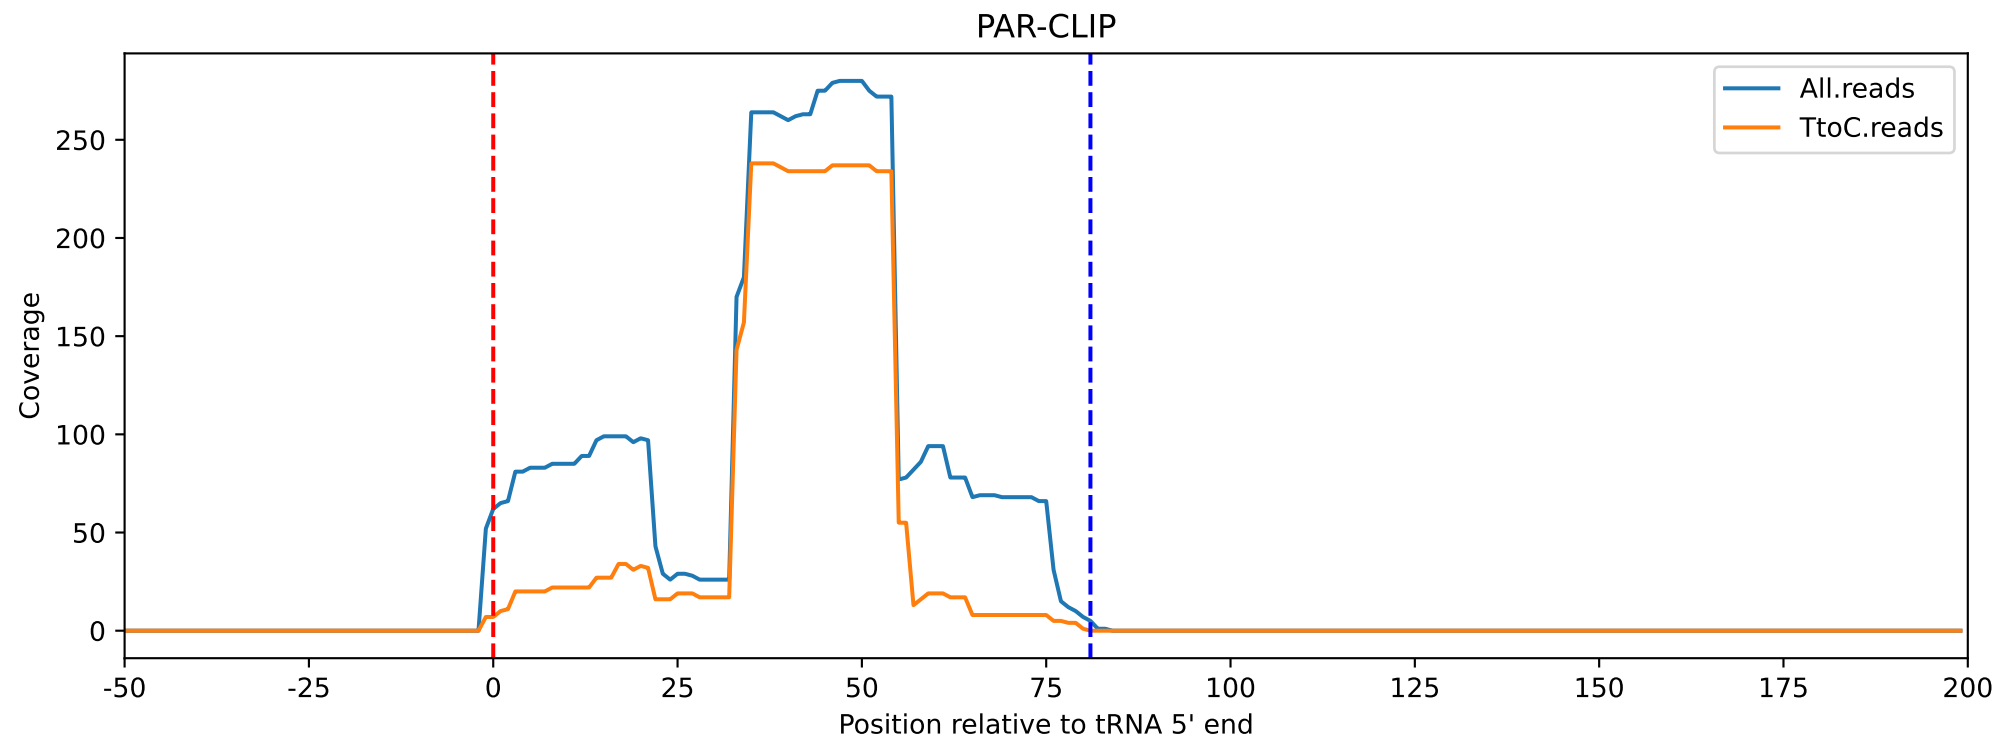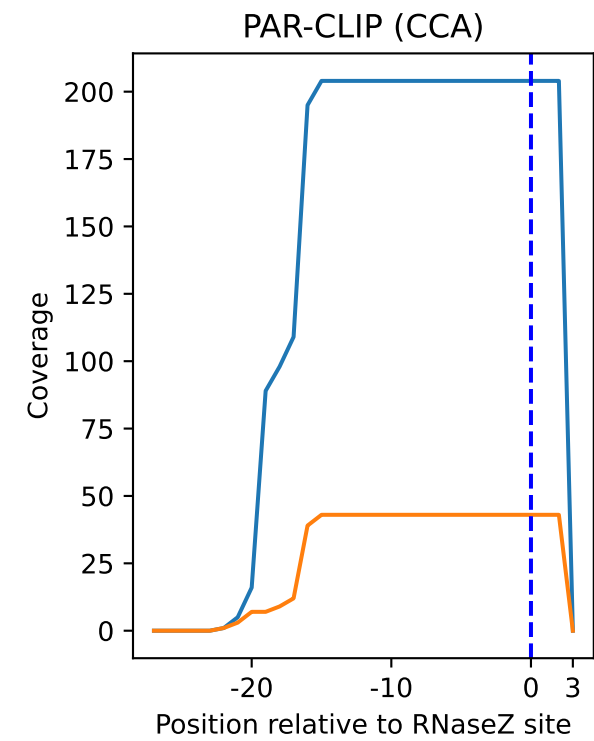

# tRNA-Tyr-GTA-1-1

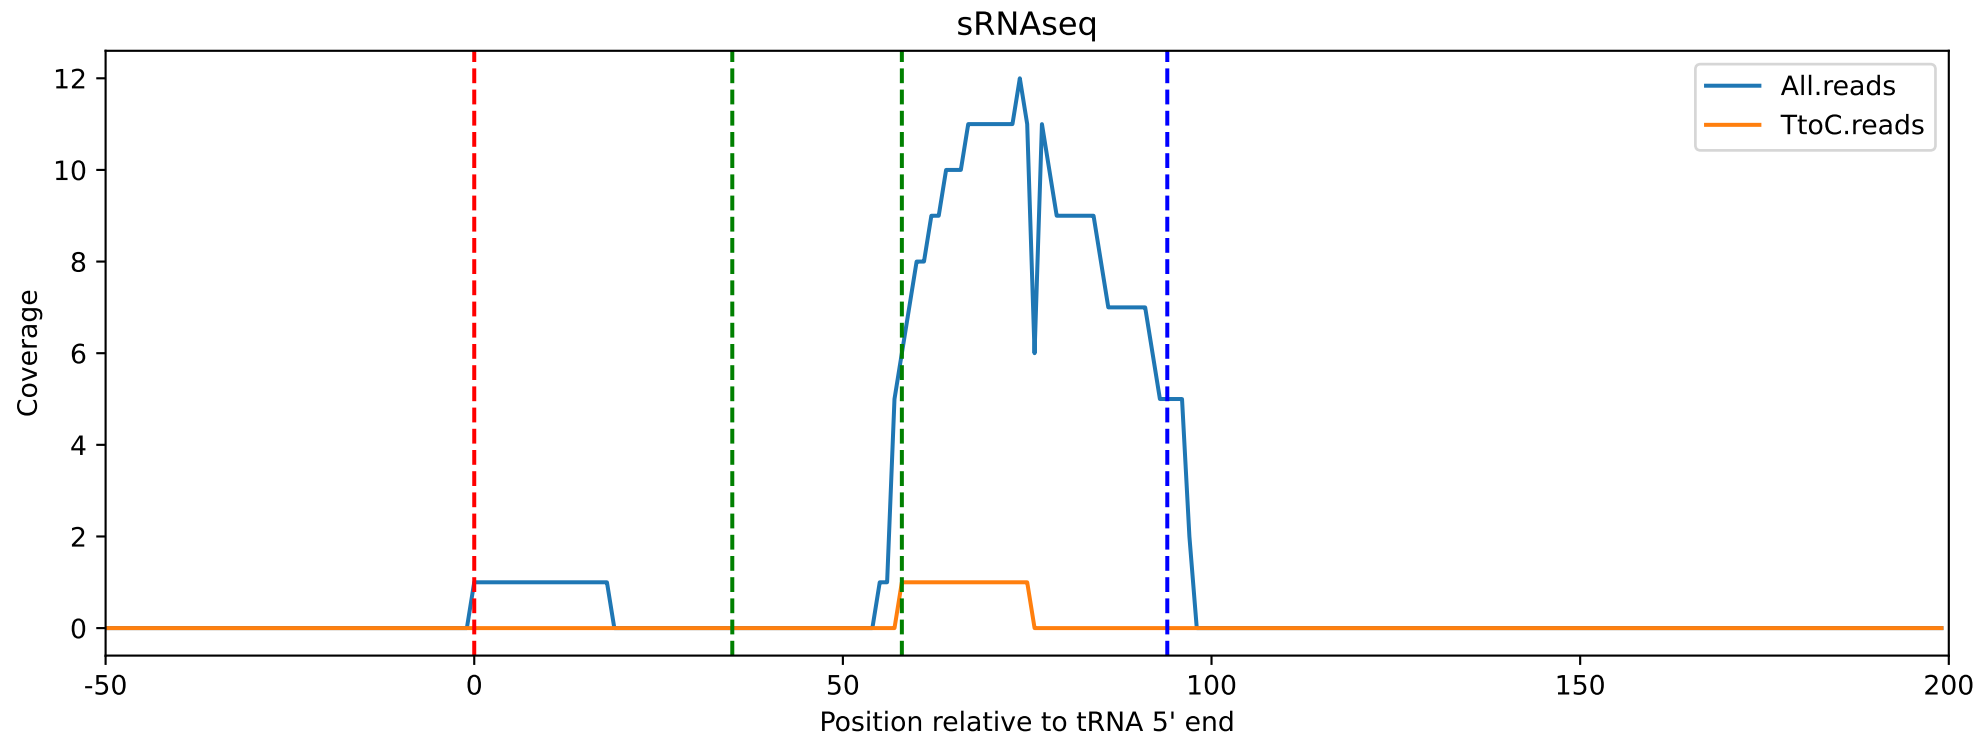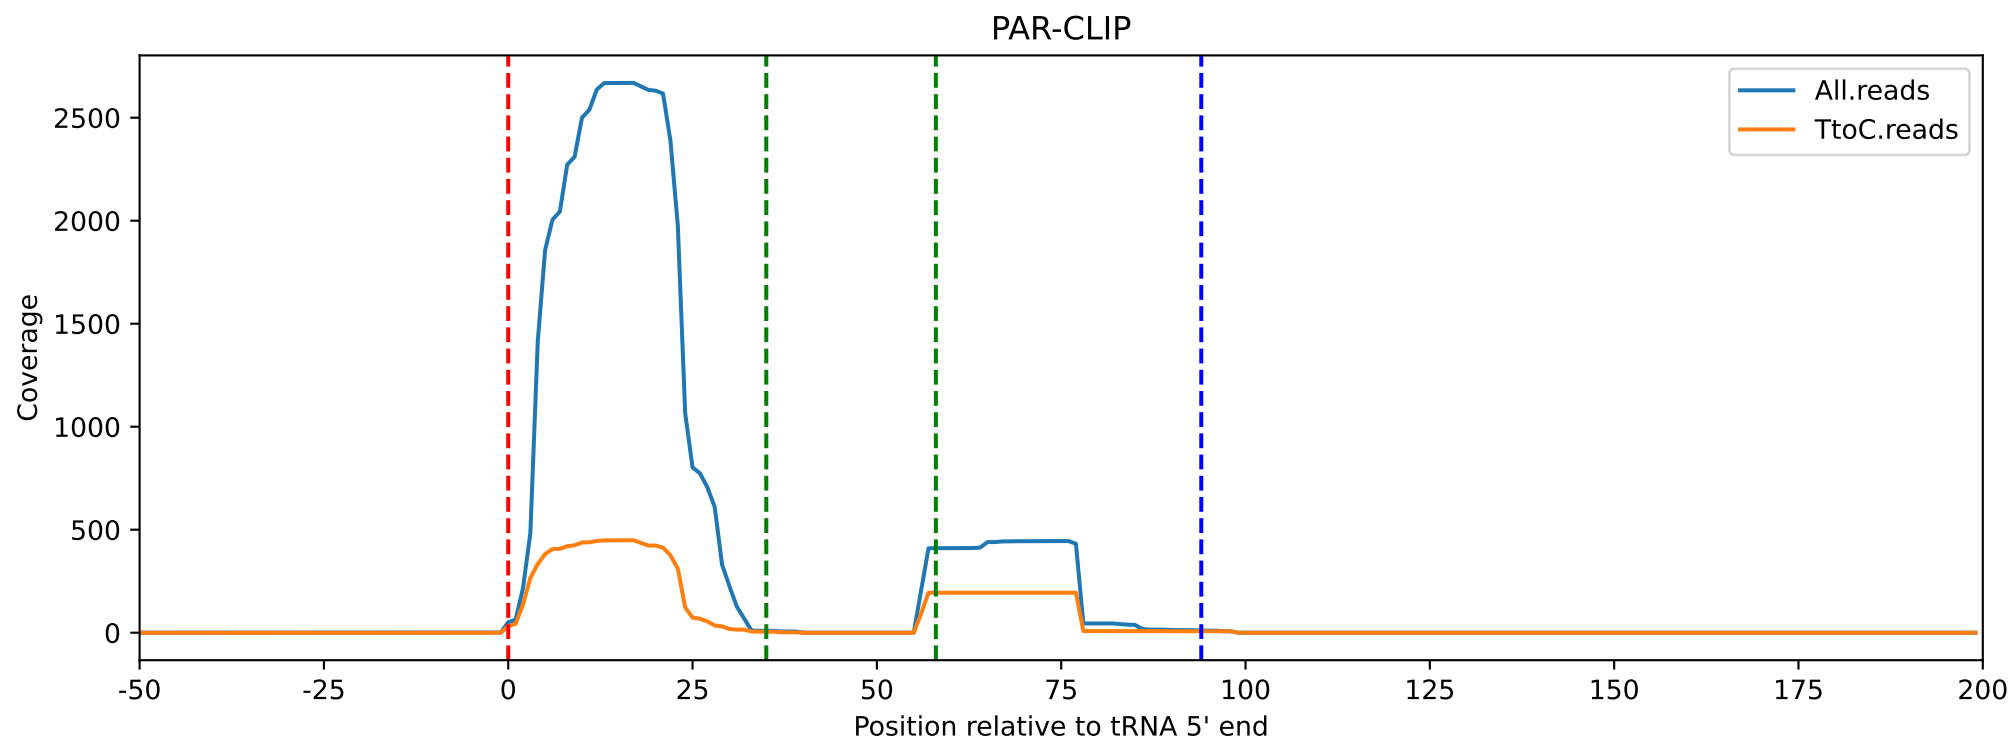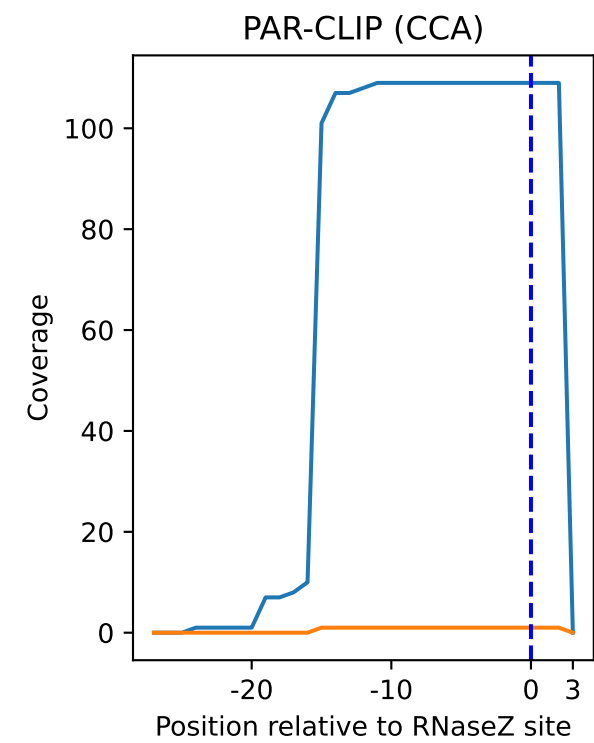



# tRNA-Trp-CCA-1-1

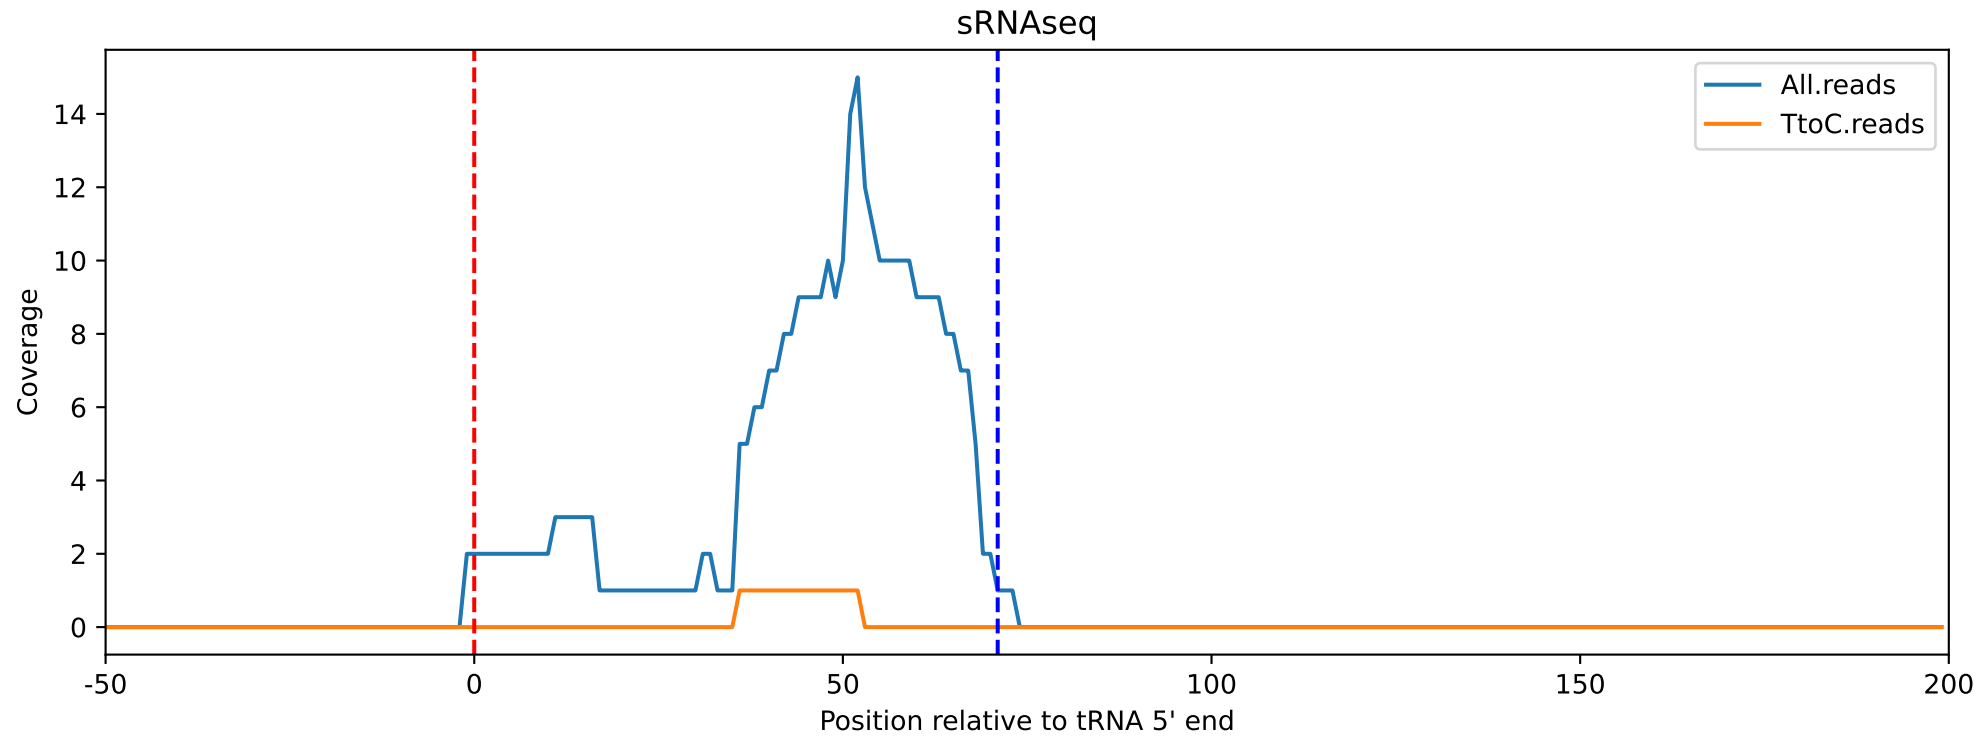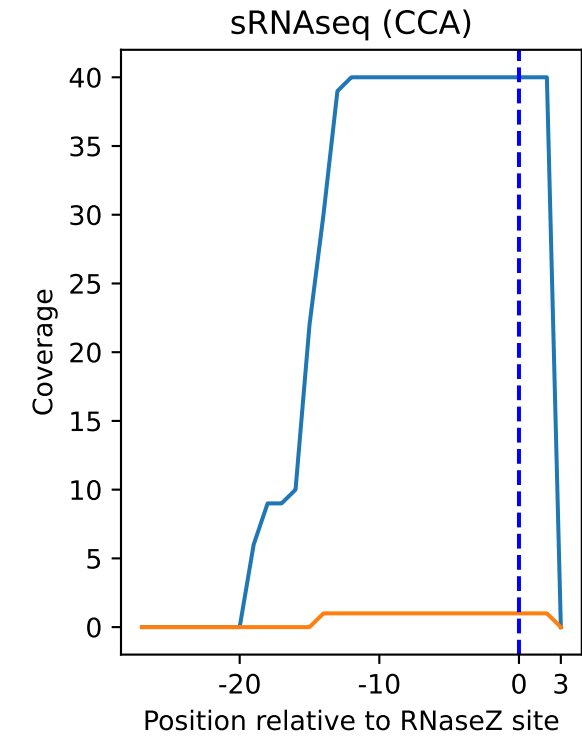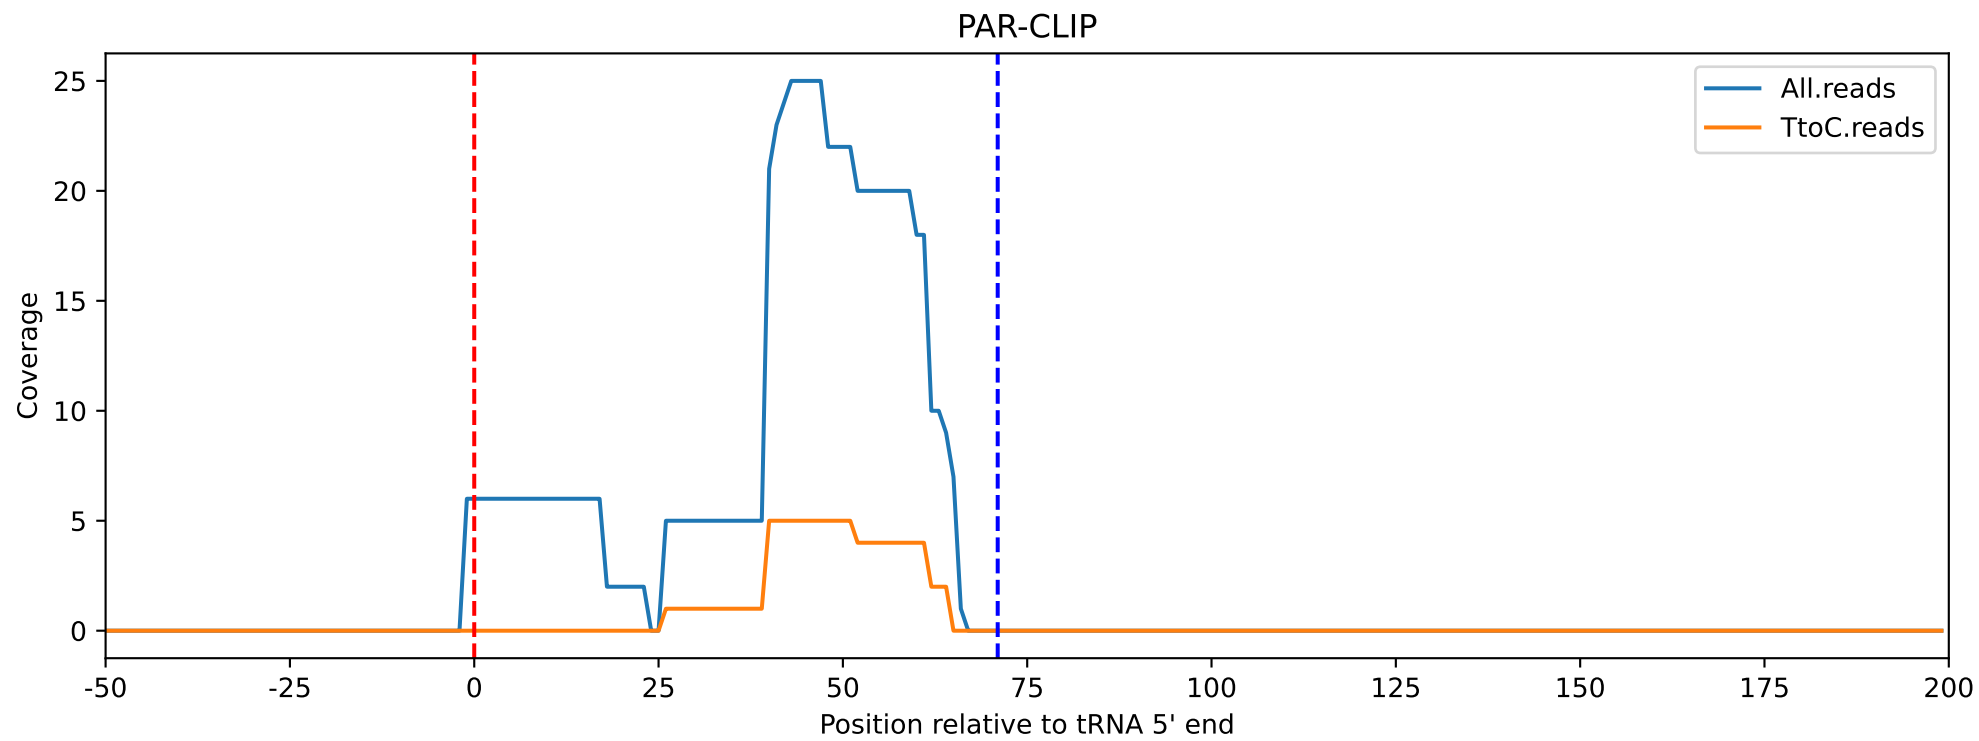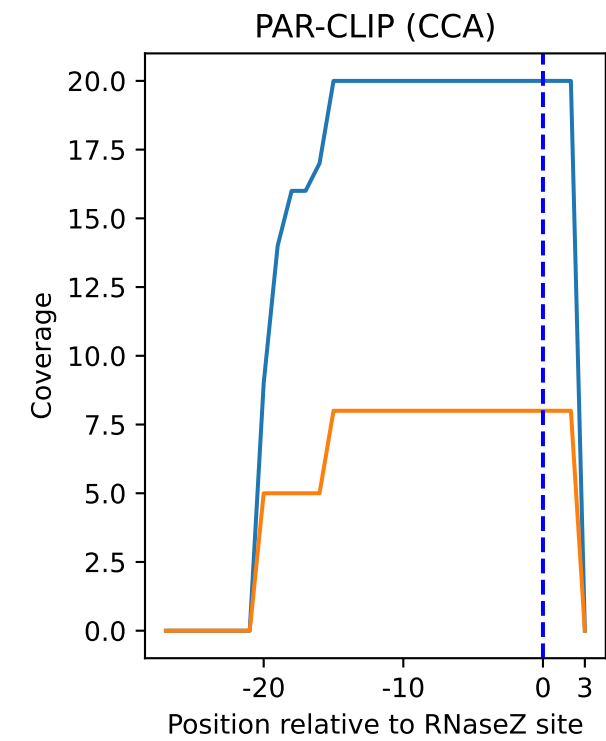

# tRNA-Tyr-GTA-1-8

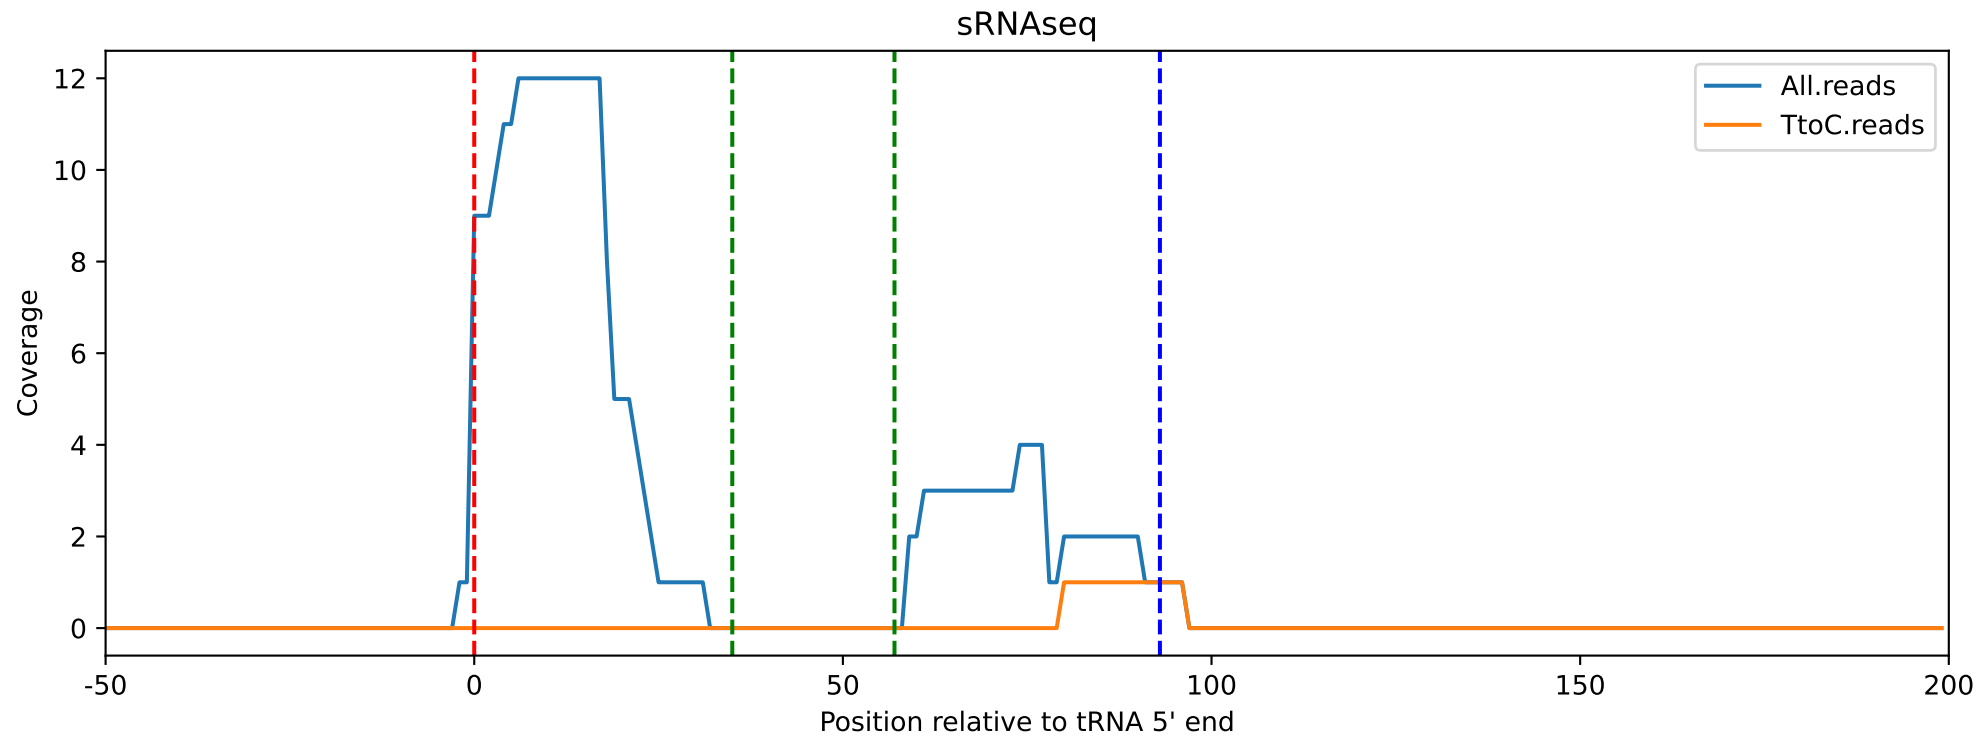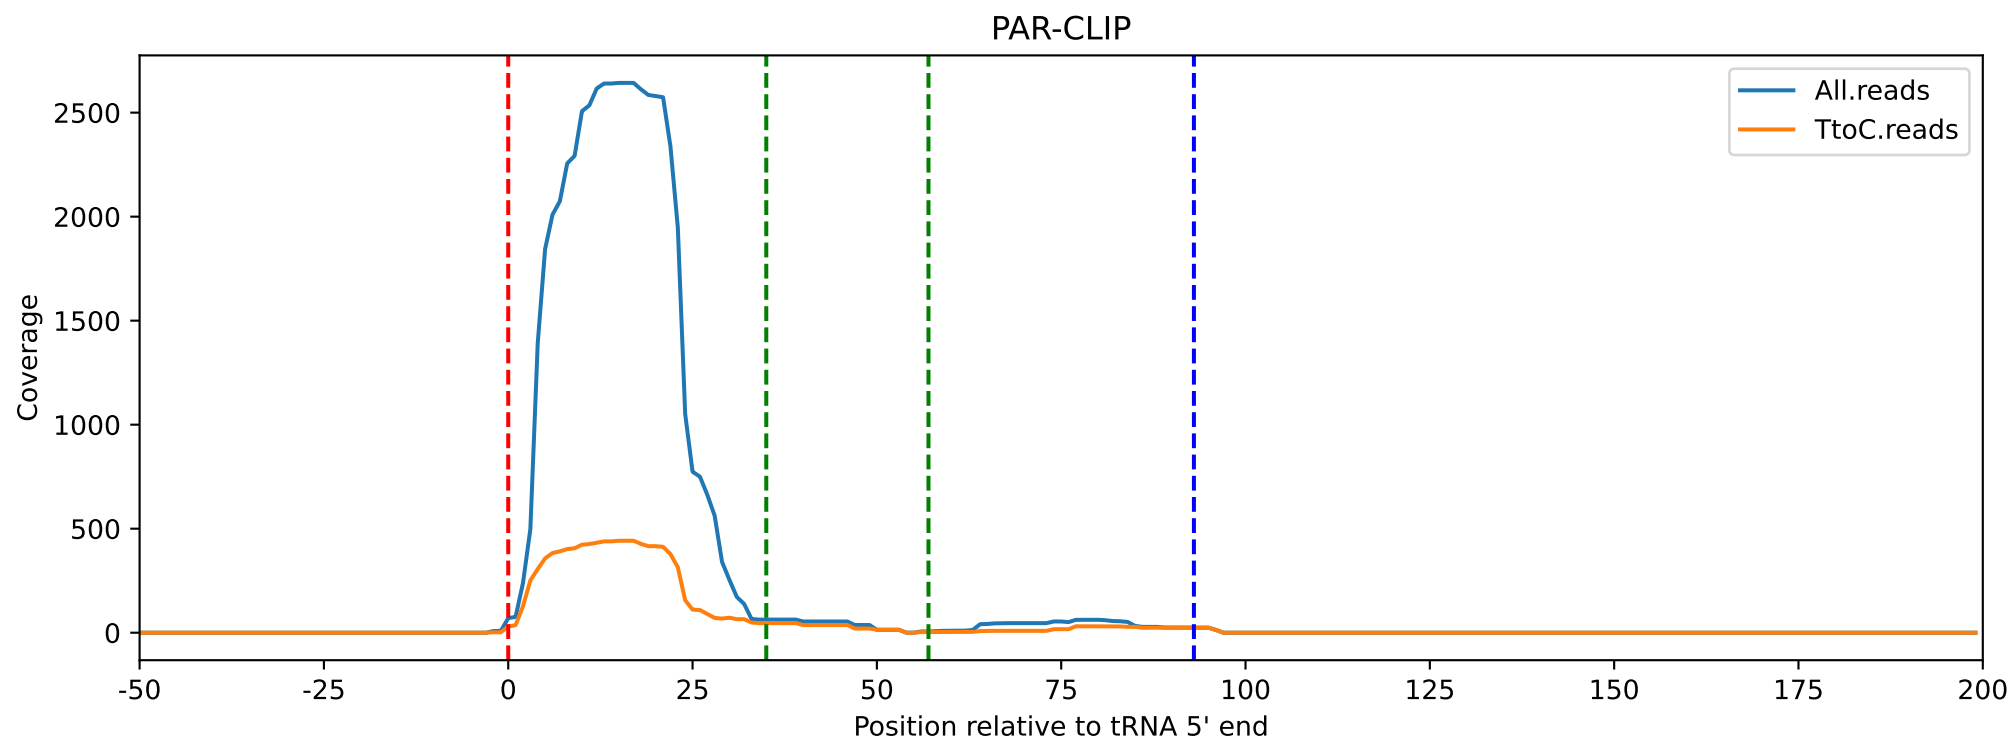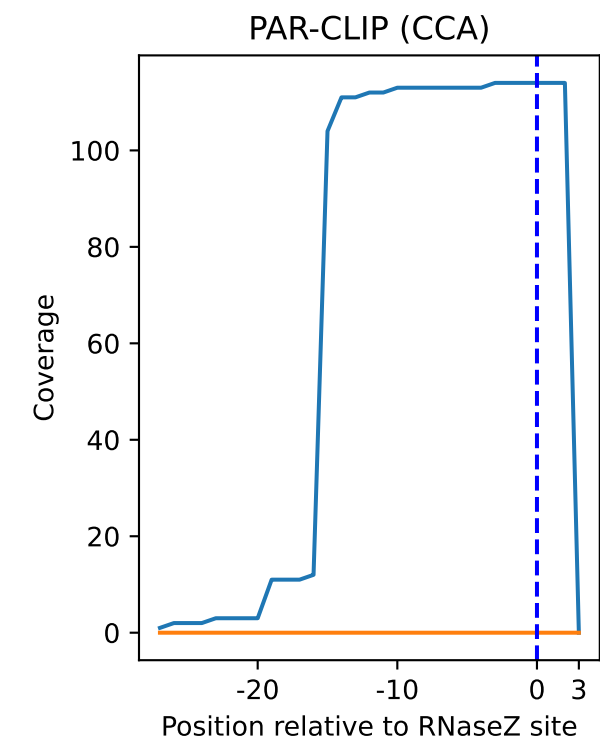

# tRNA-Thr-CGT-1-1

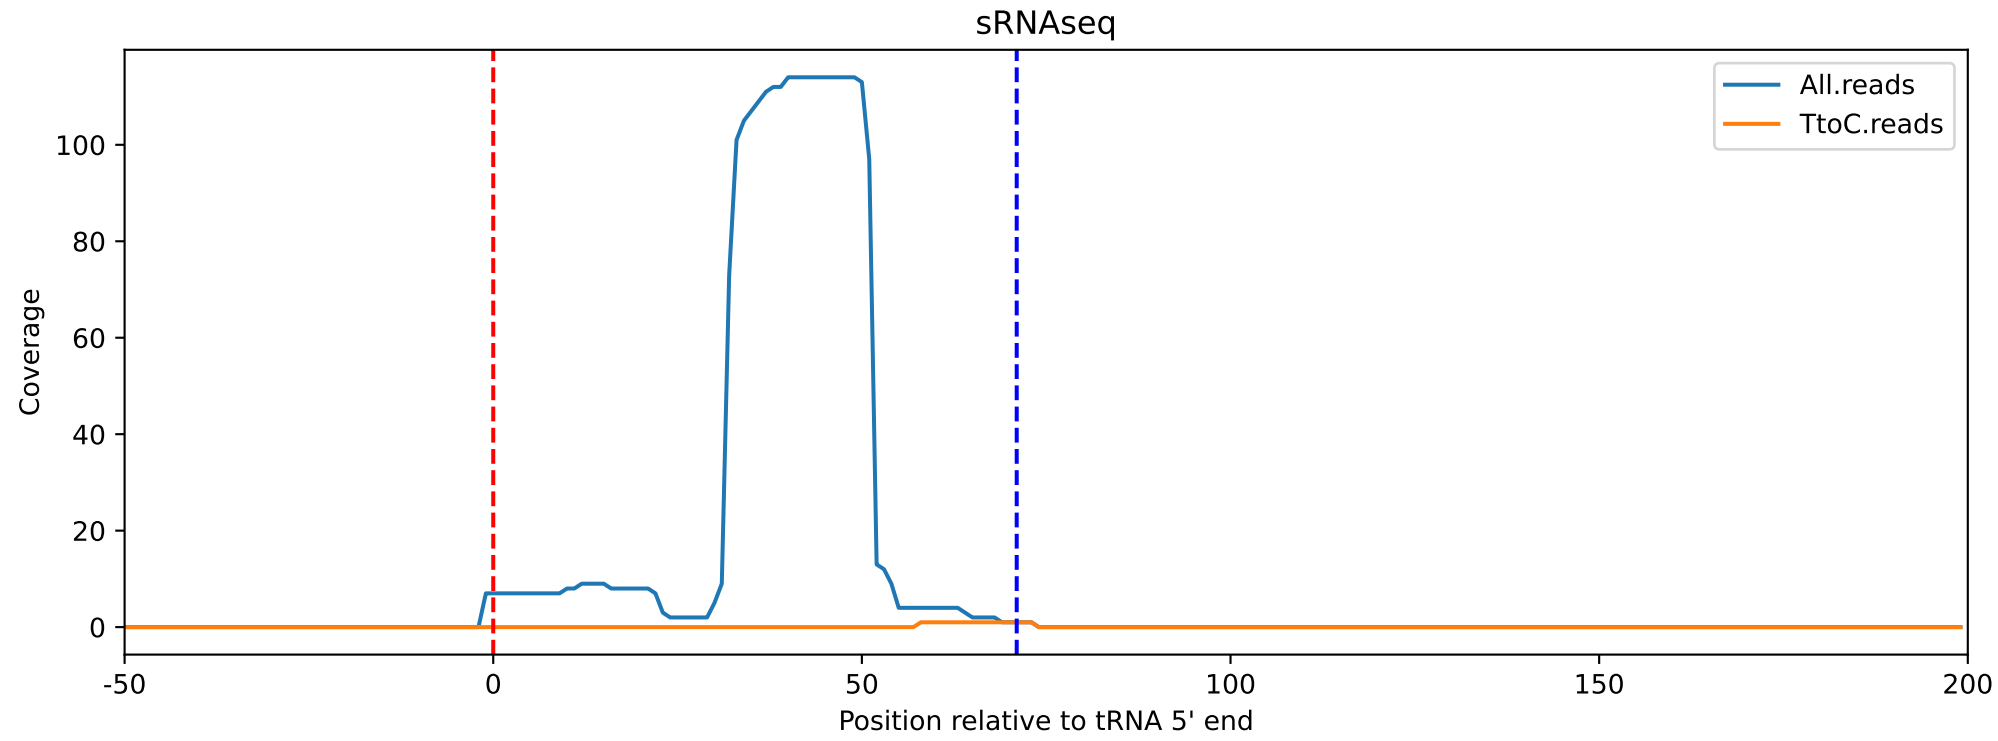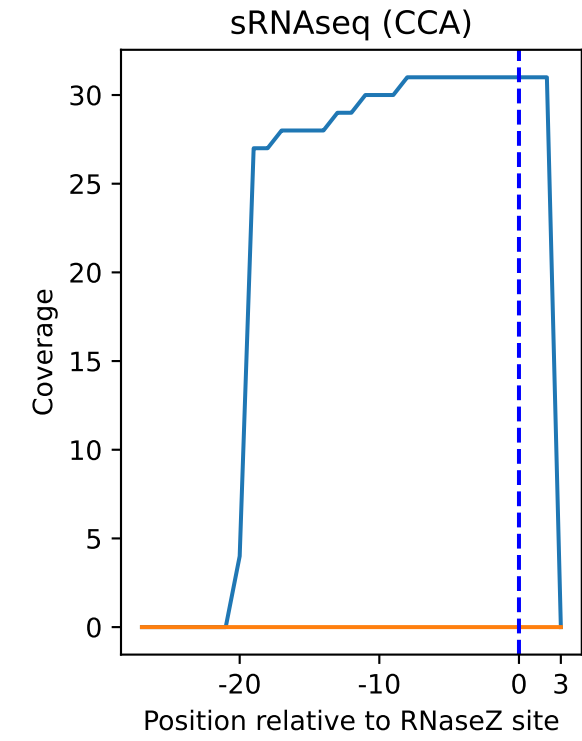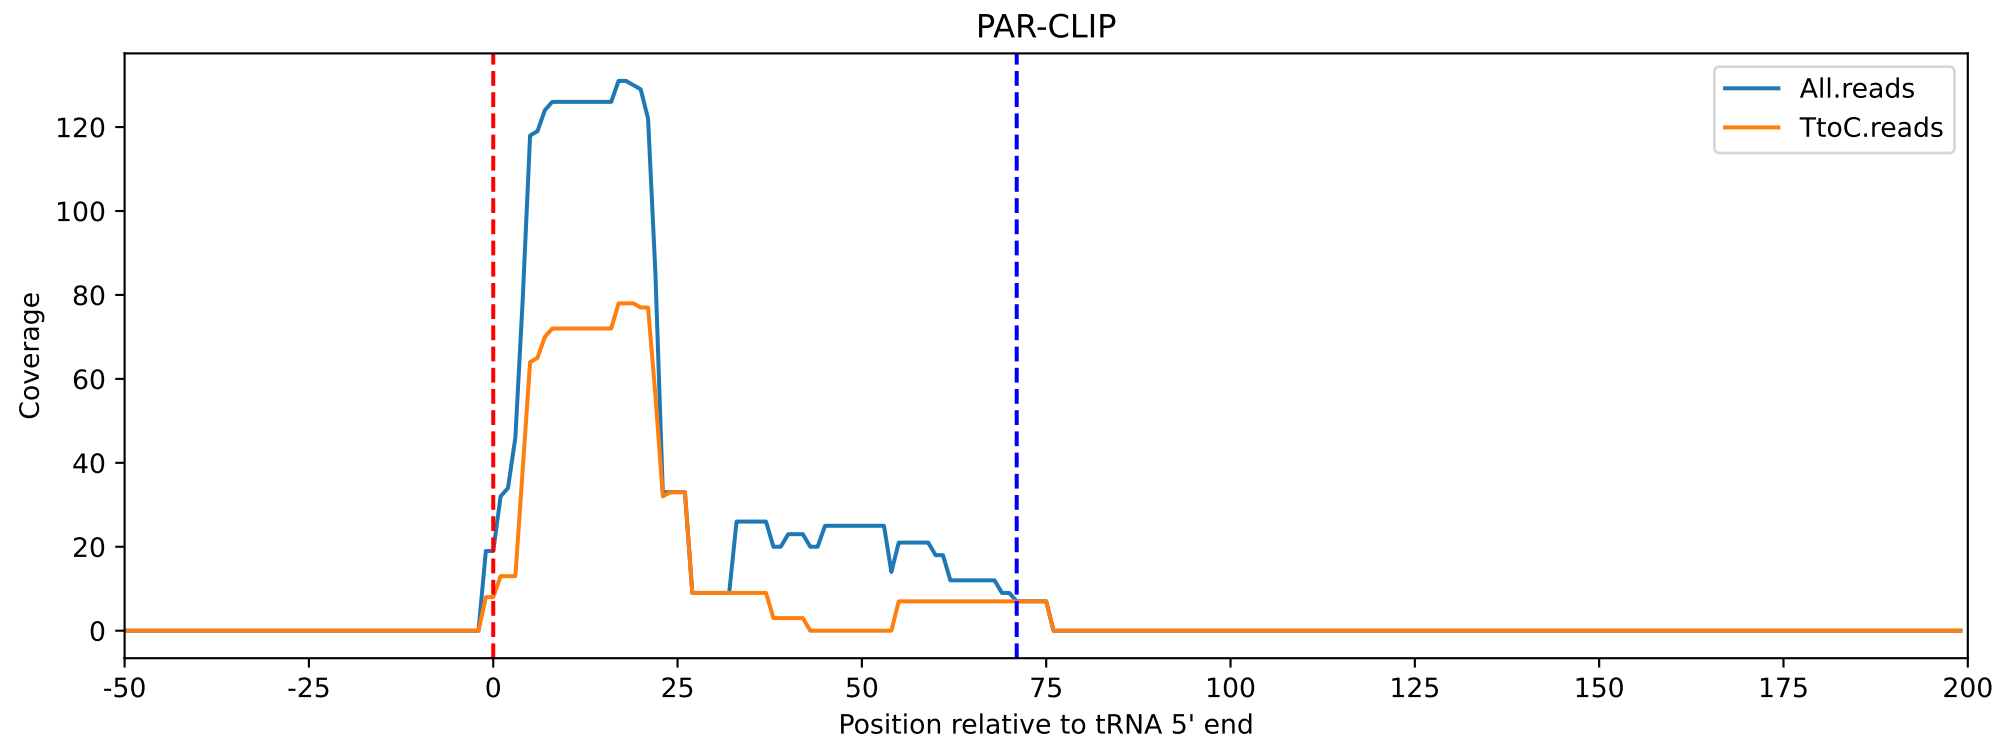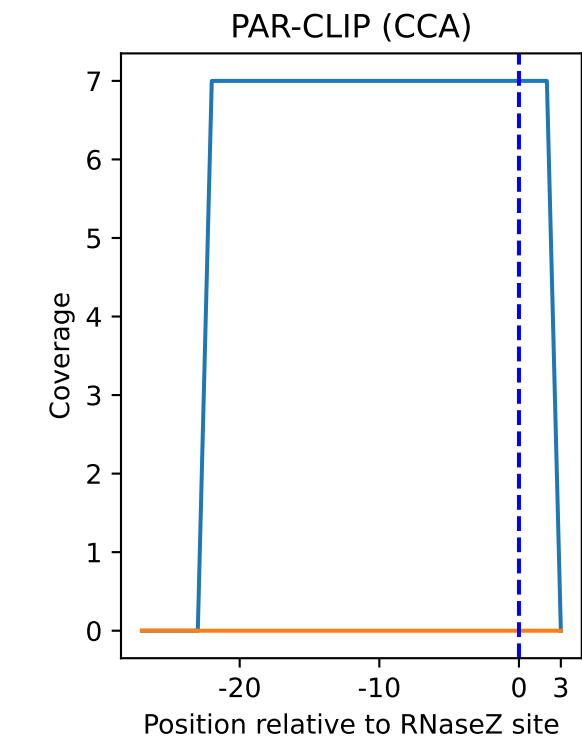

# tRNA-Arg-ACG-1-2

## sRNAseq

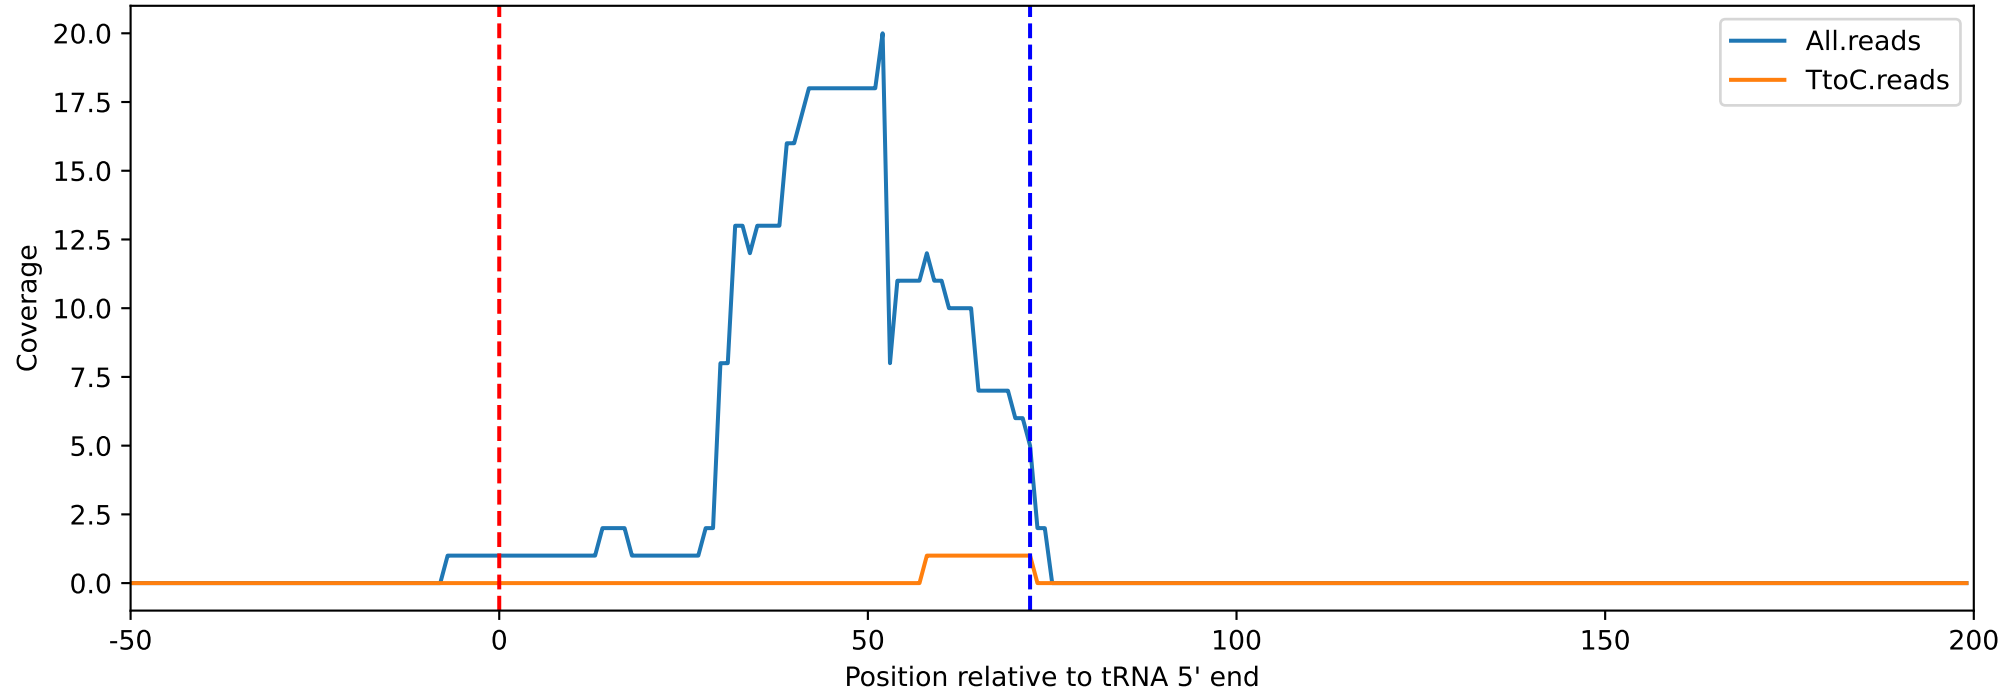

## sRNAseq (CCA)

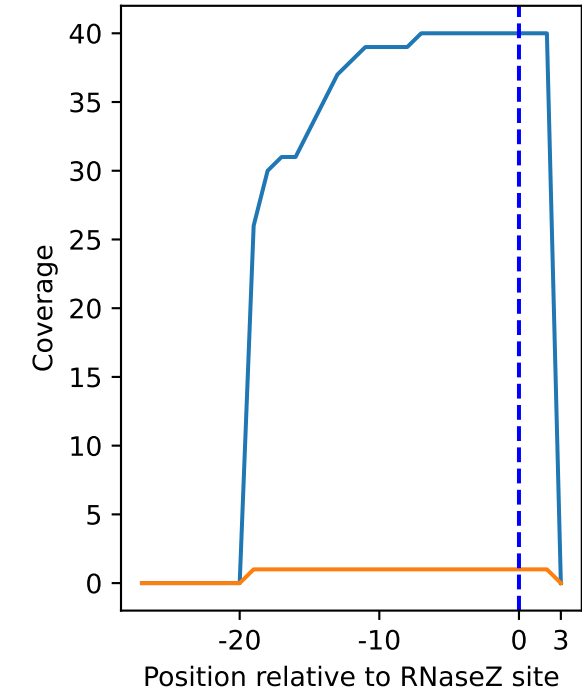

## PAR-CLIP

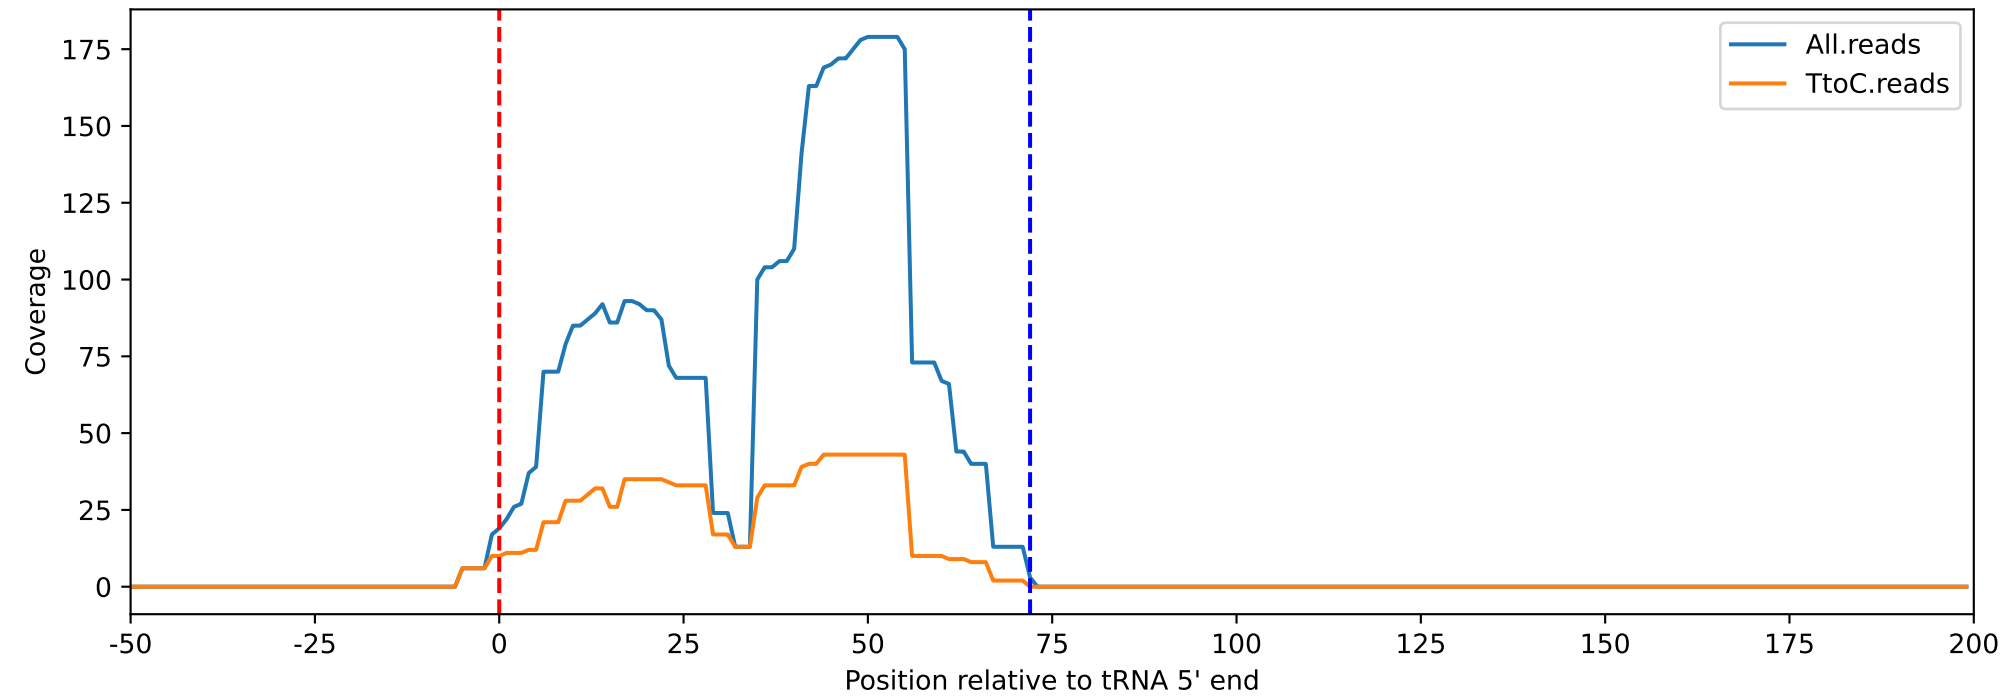

## PAR-CLIP (CCA)

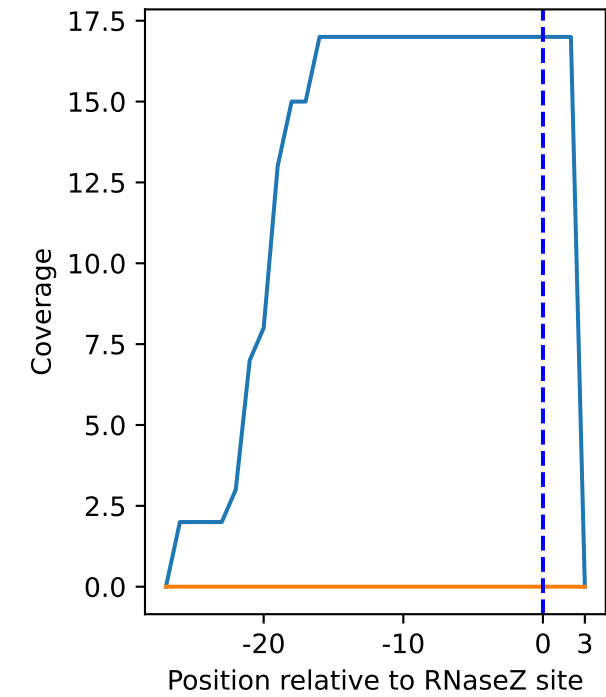

# tRNA-Arg-TCT-2-1

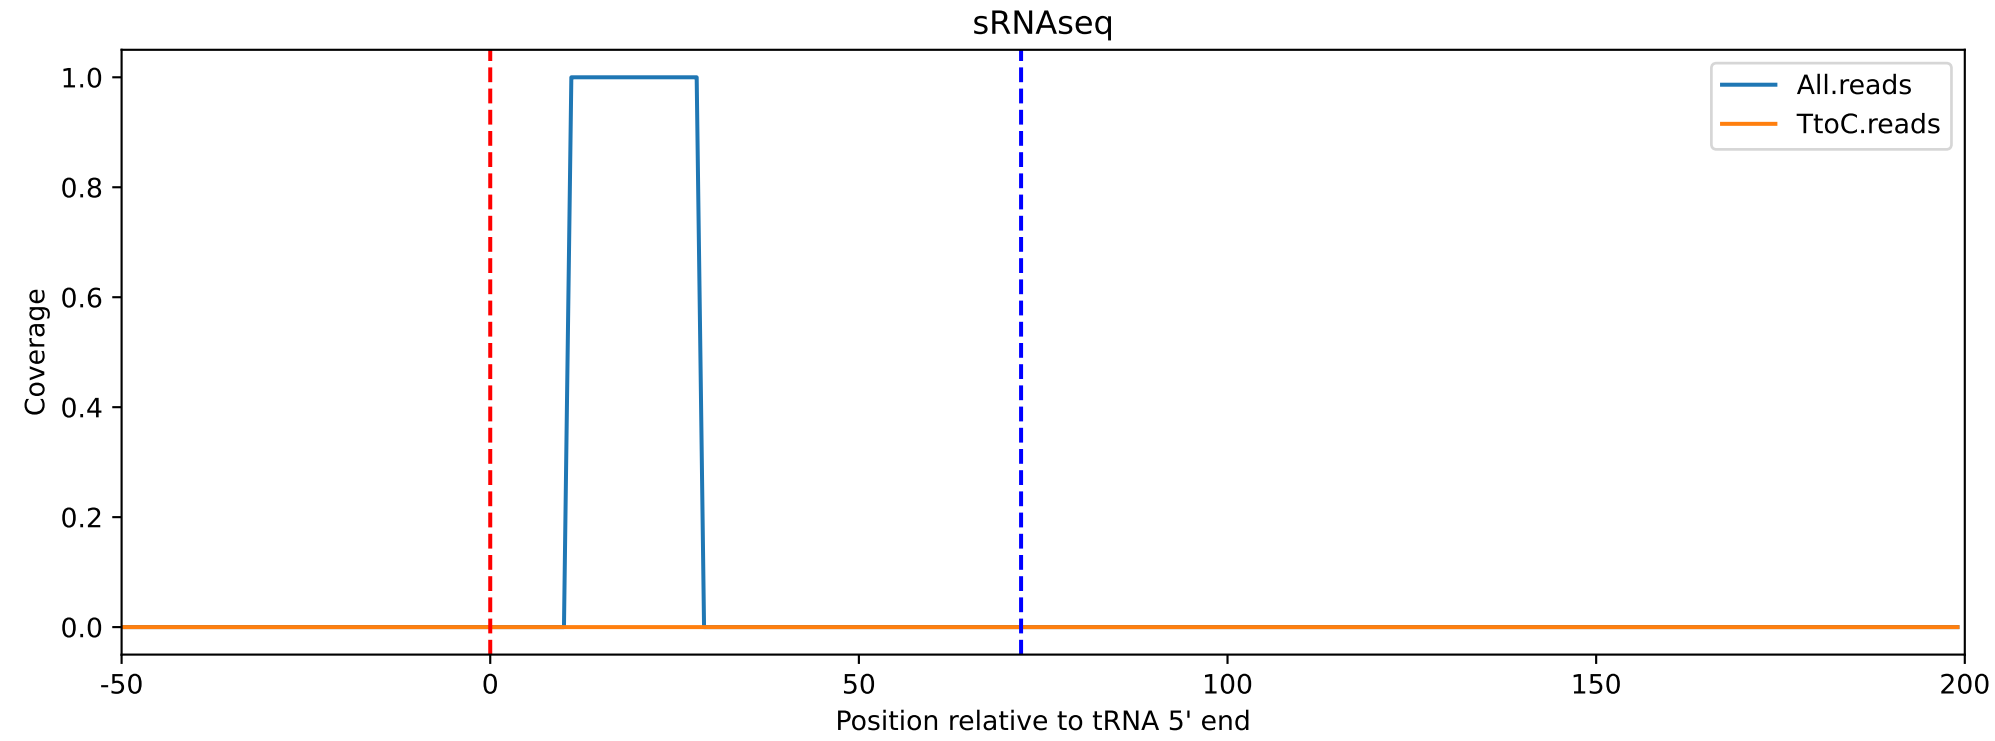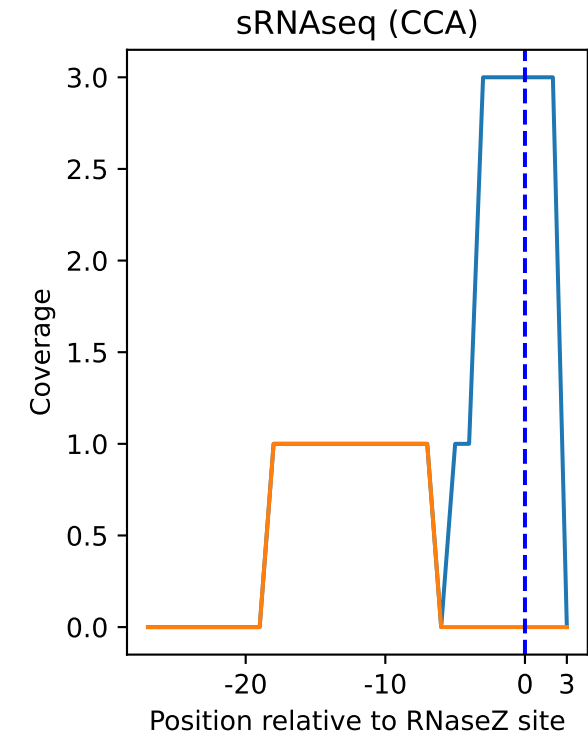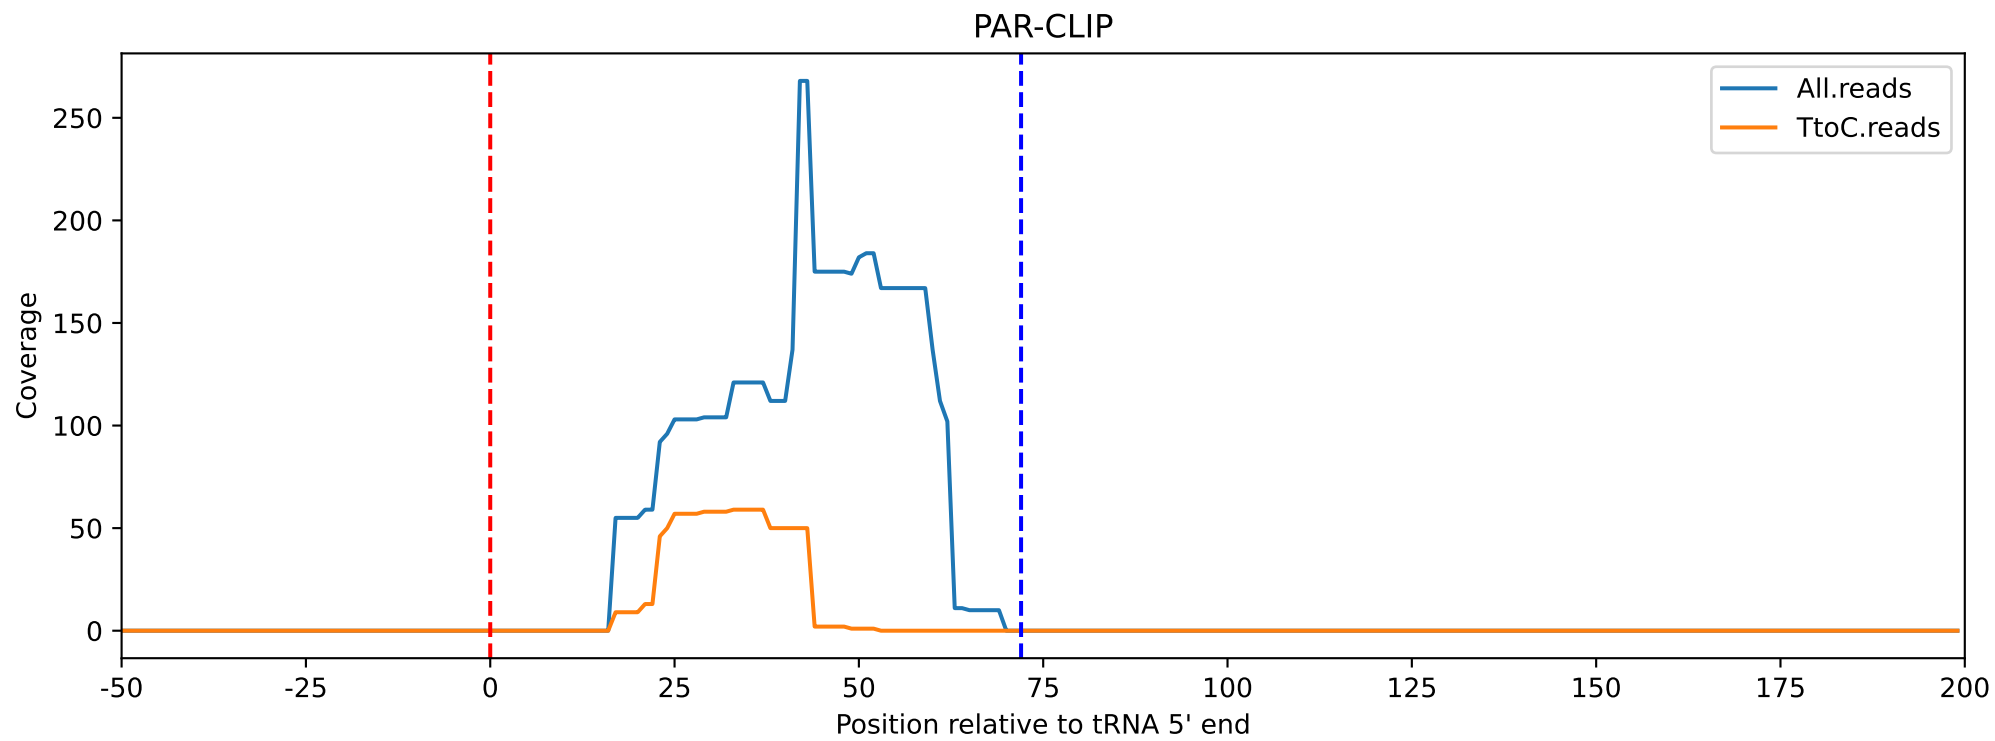

# tRNA-Arg-TCT-3-1

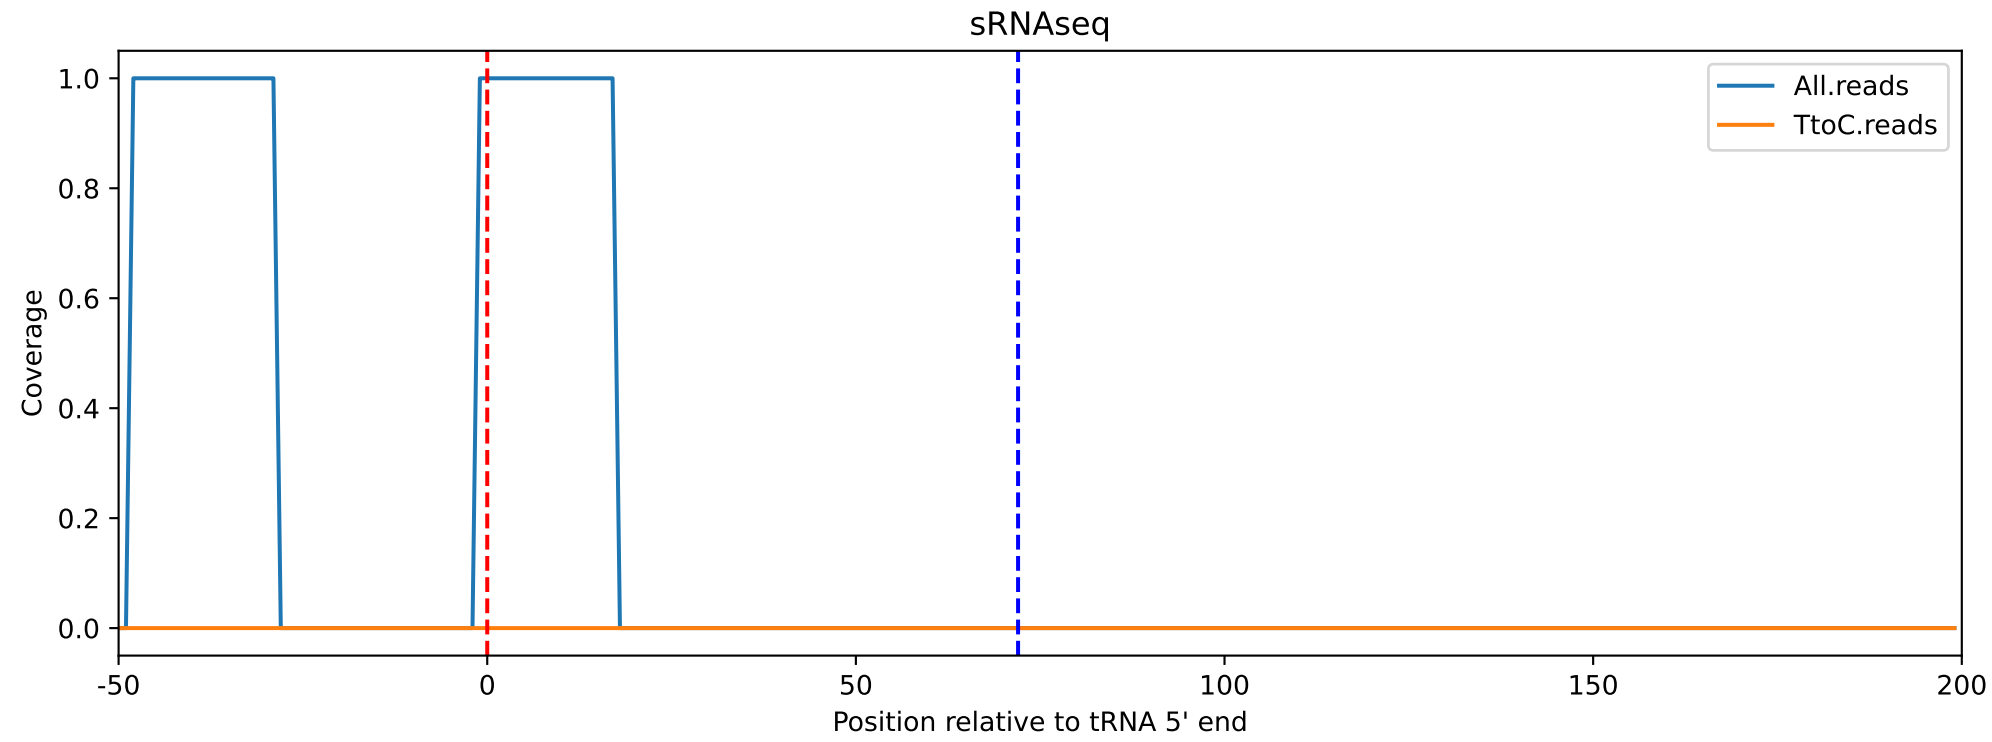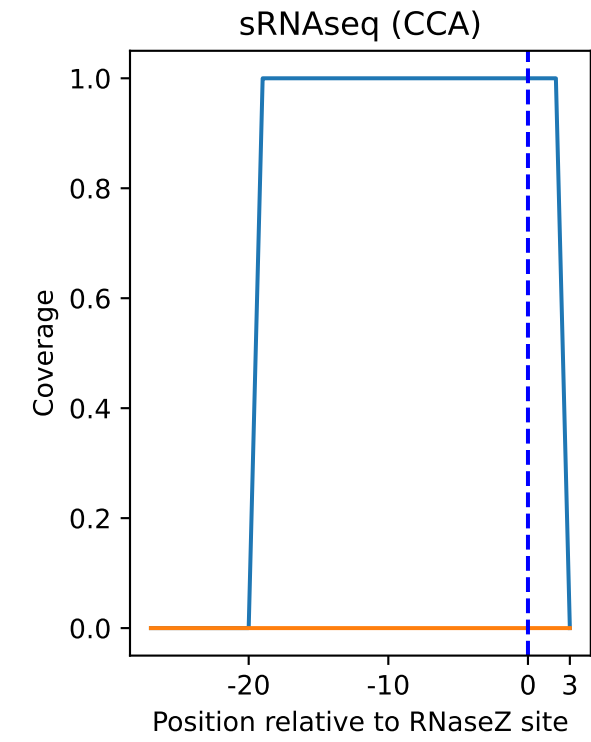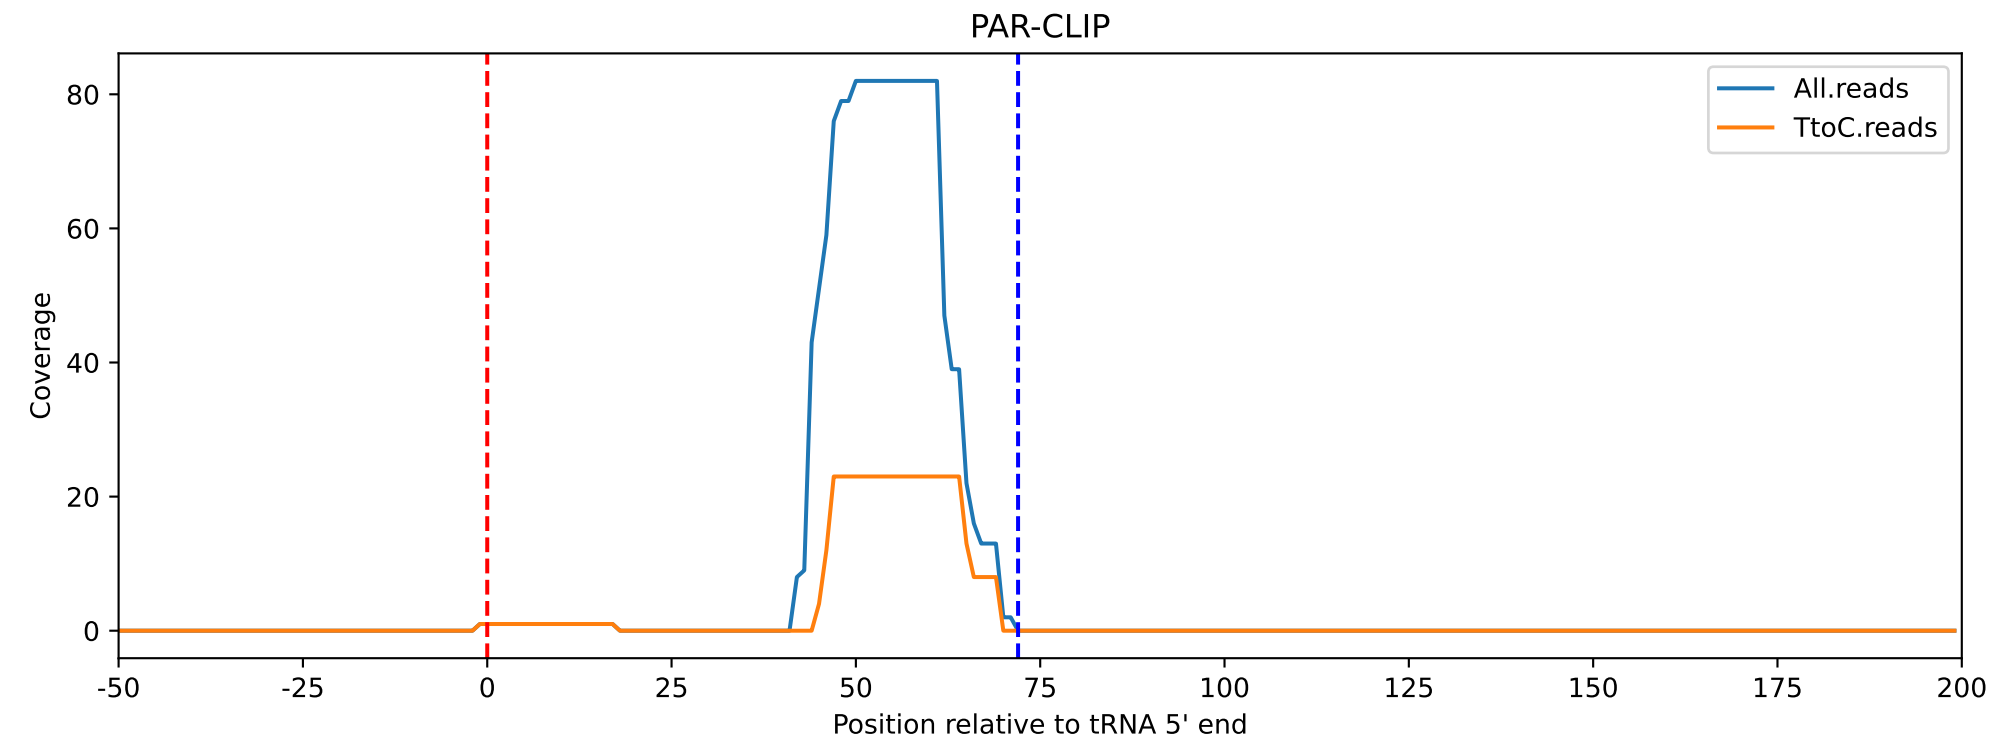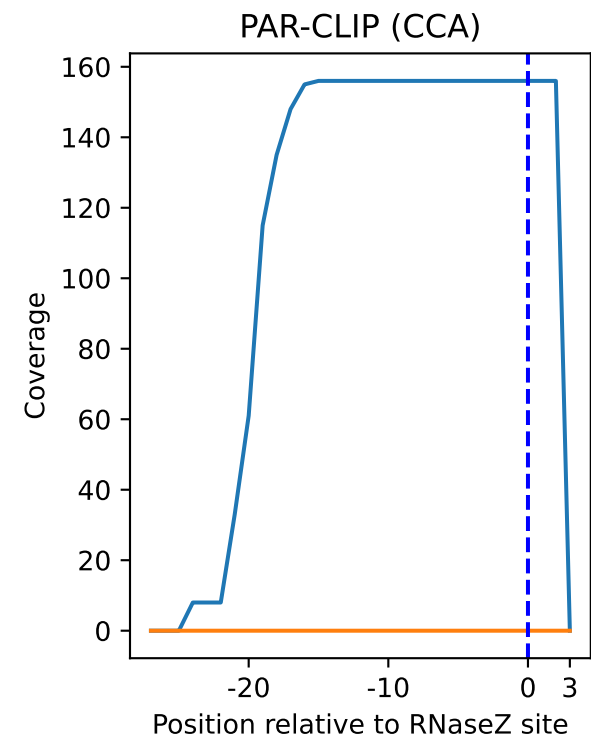

# tRNA-Ser-AGA-2-4

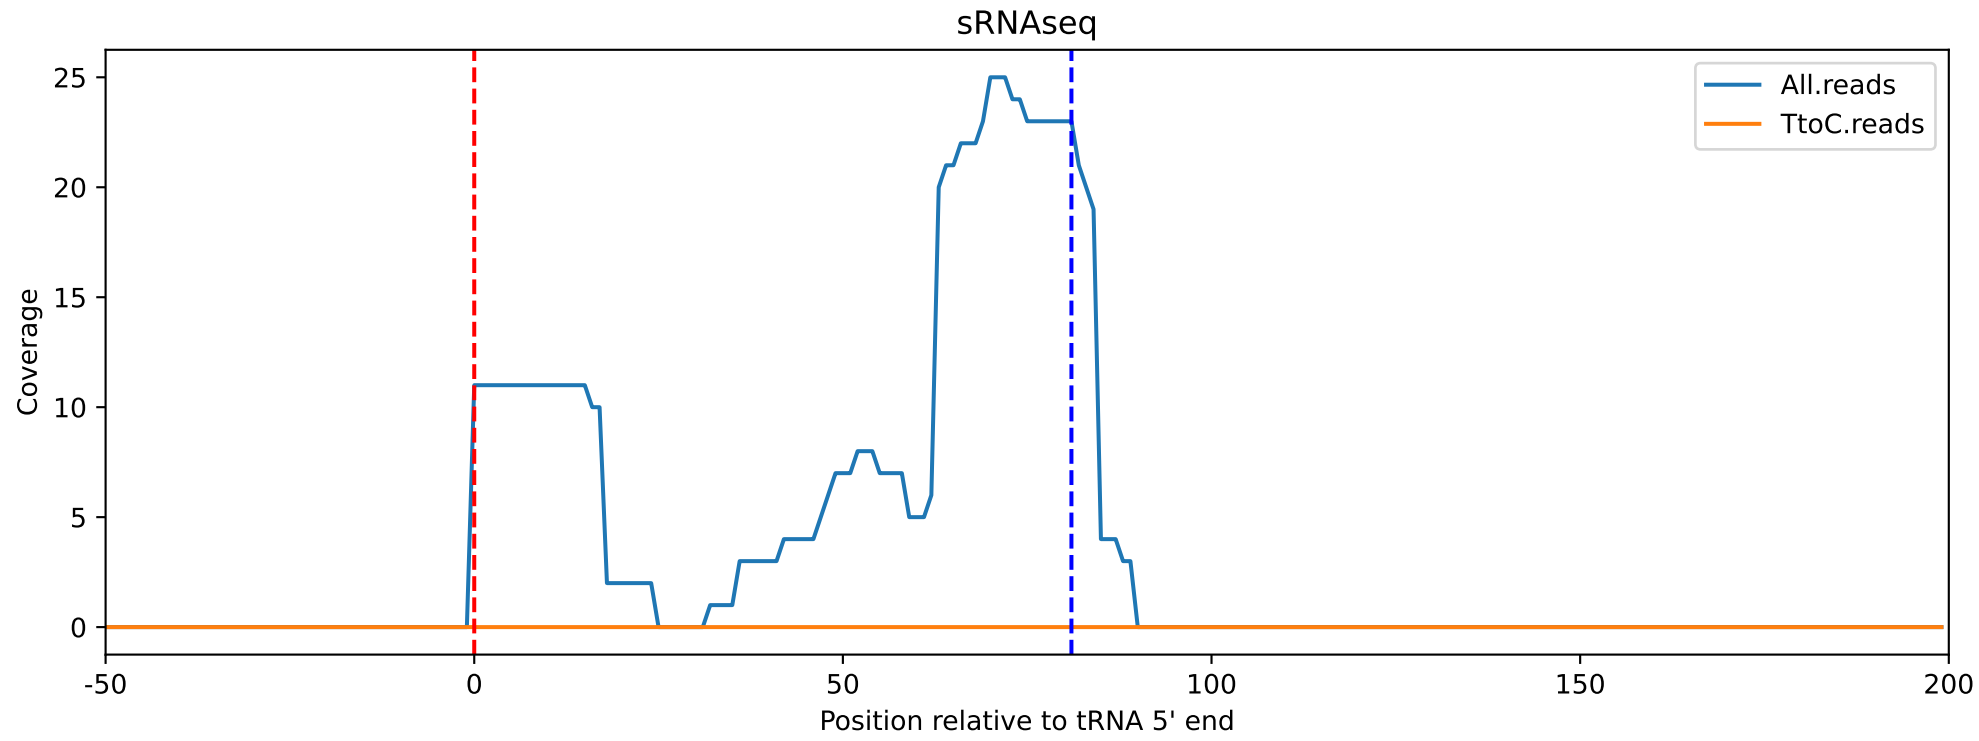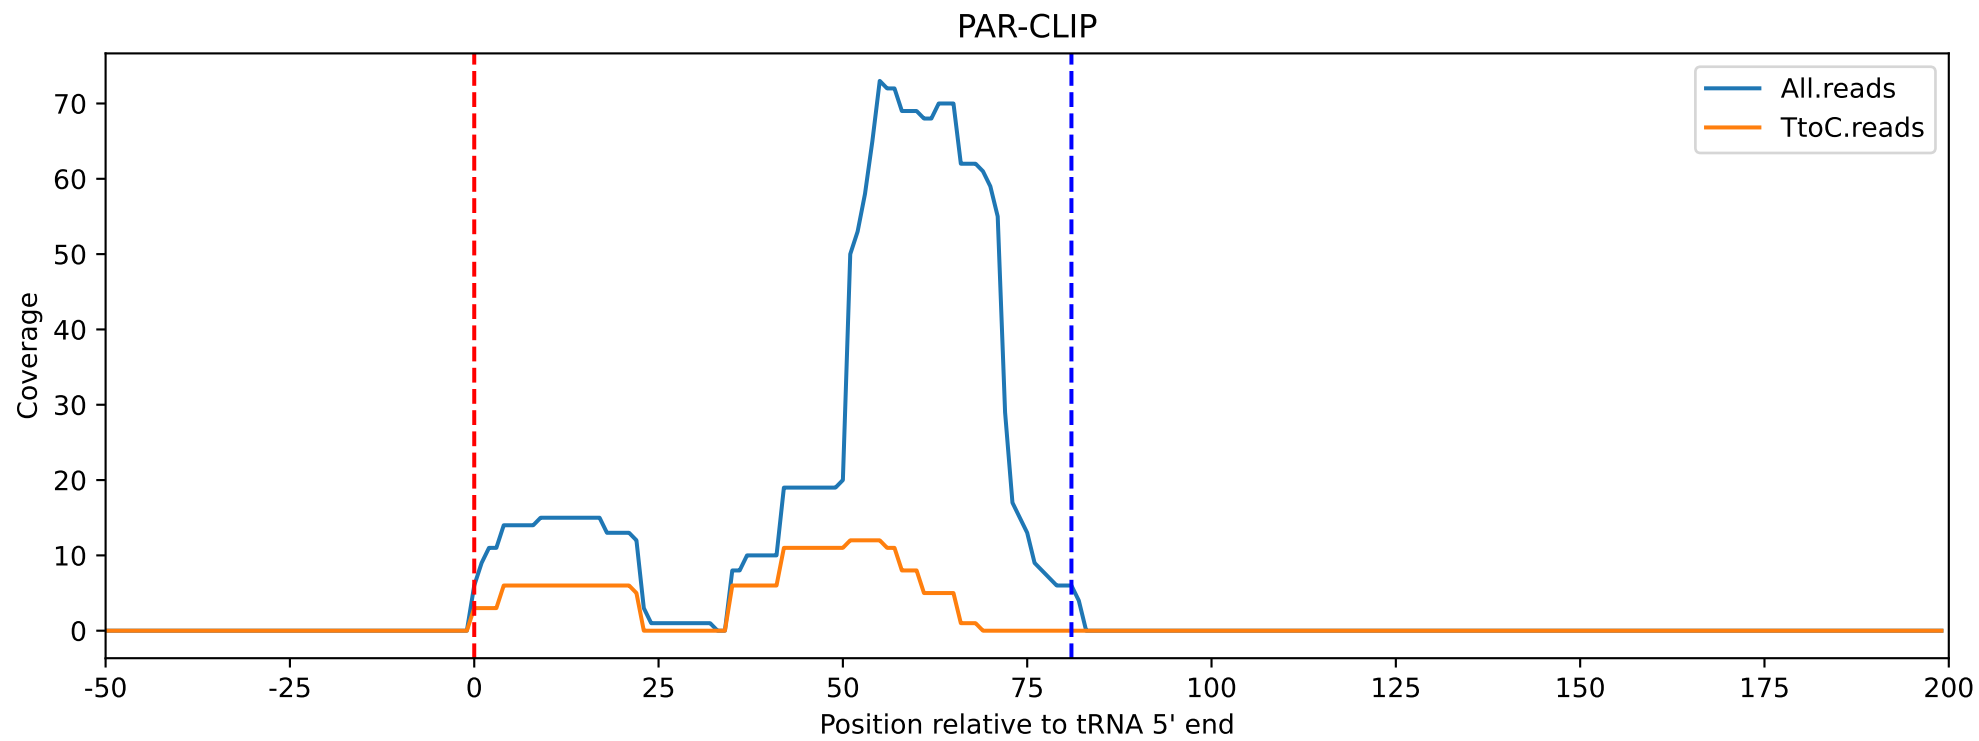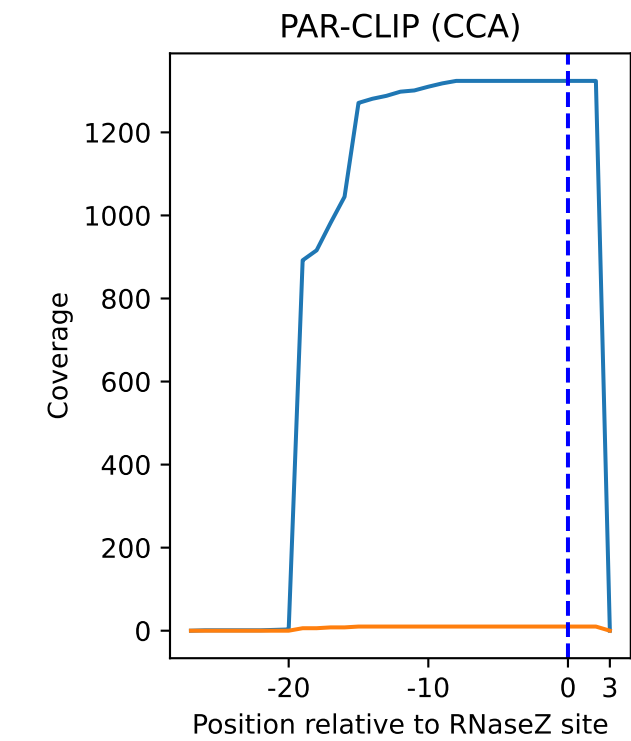

# tRNA-Lys-TTT-1-1

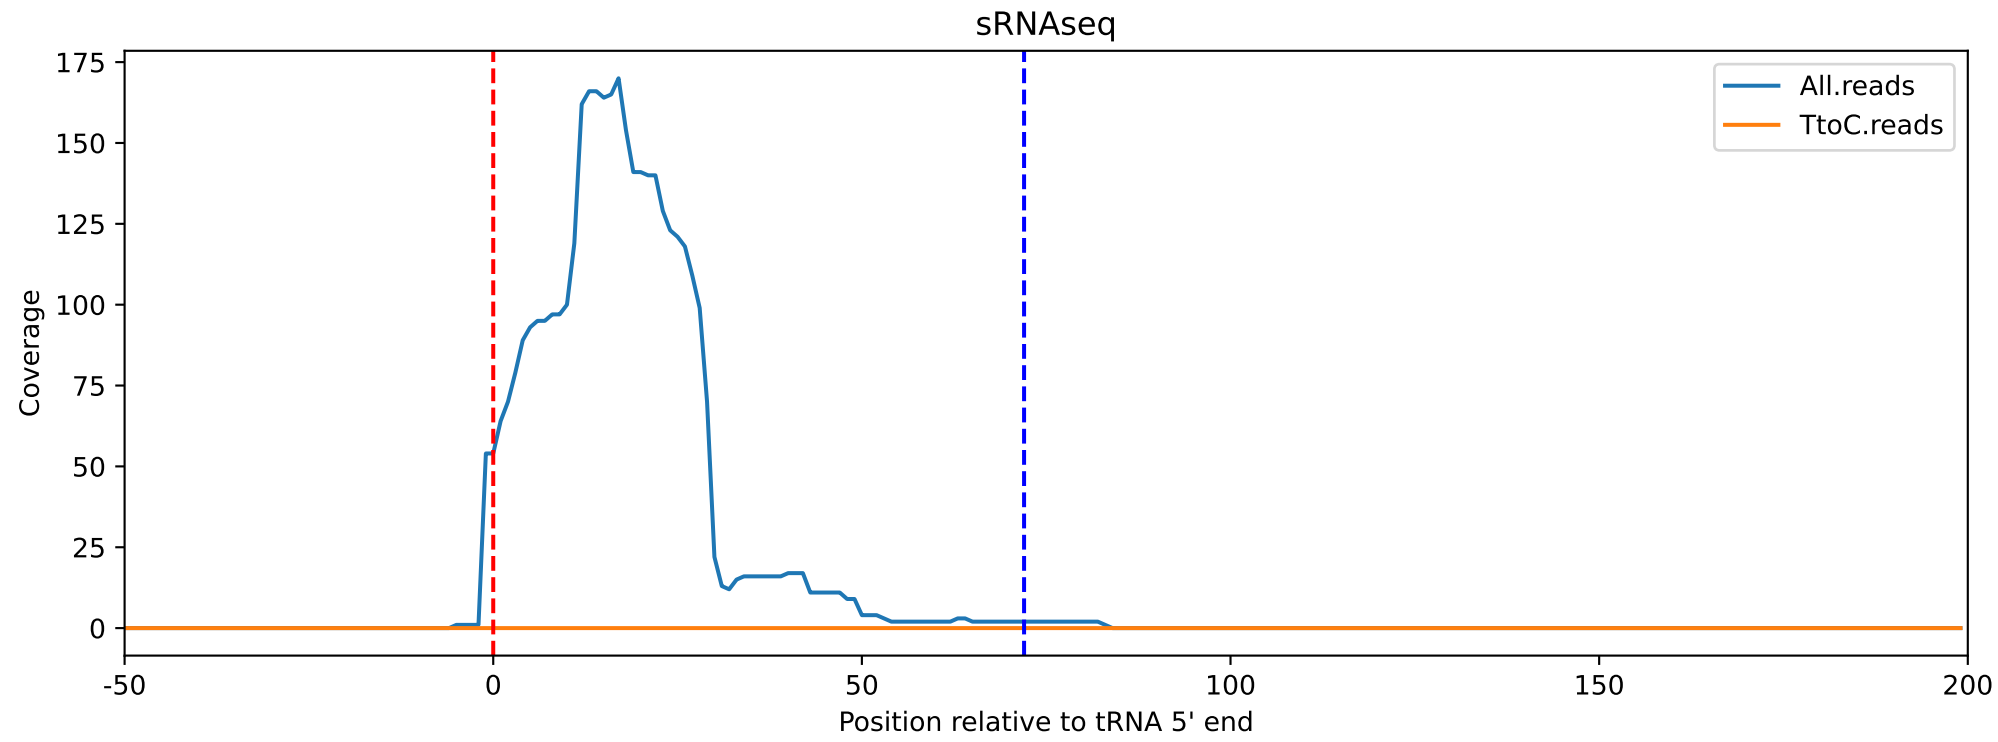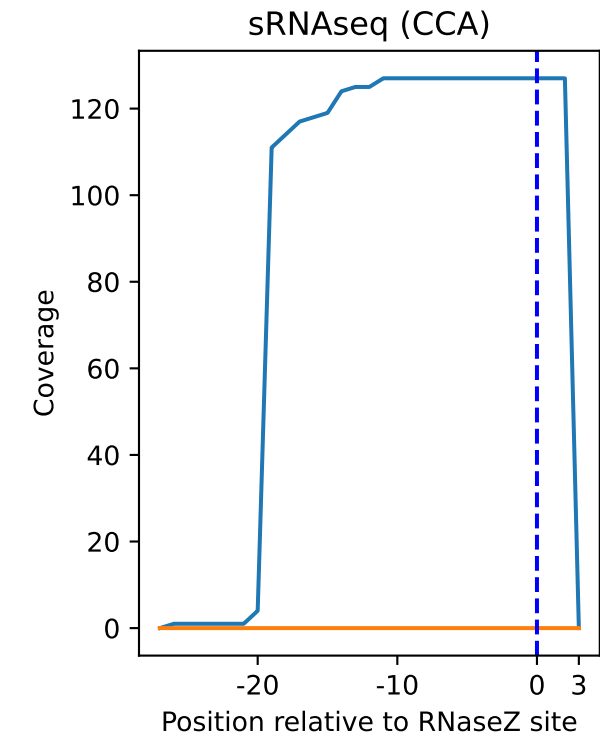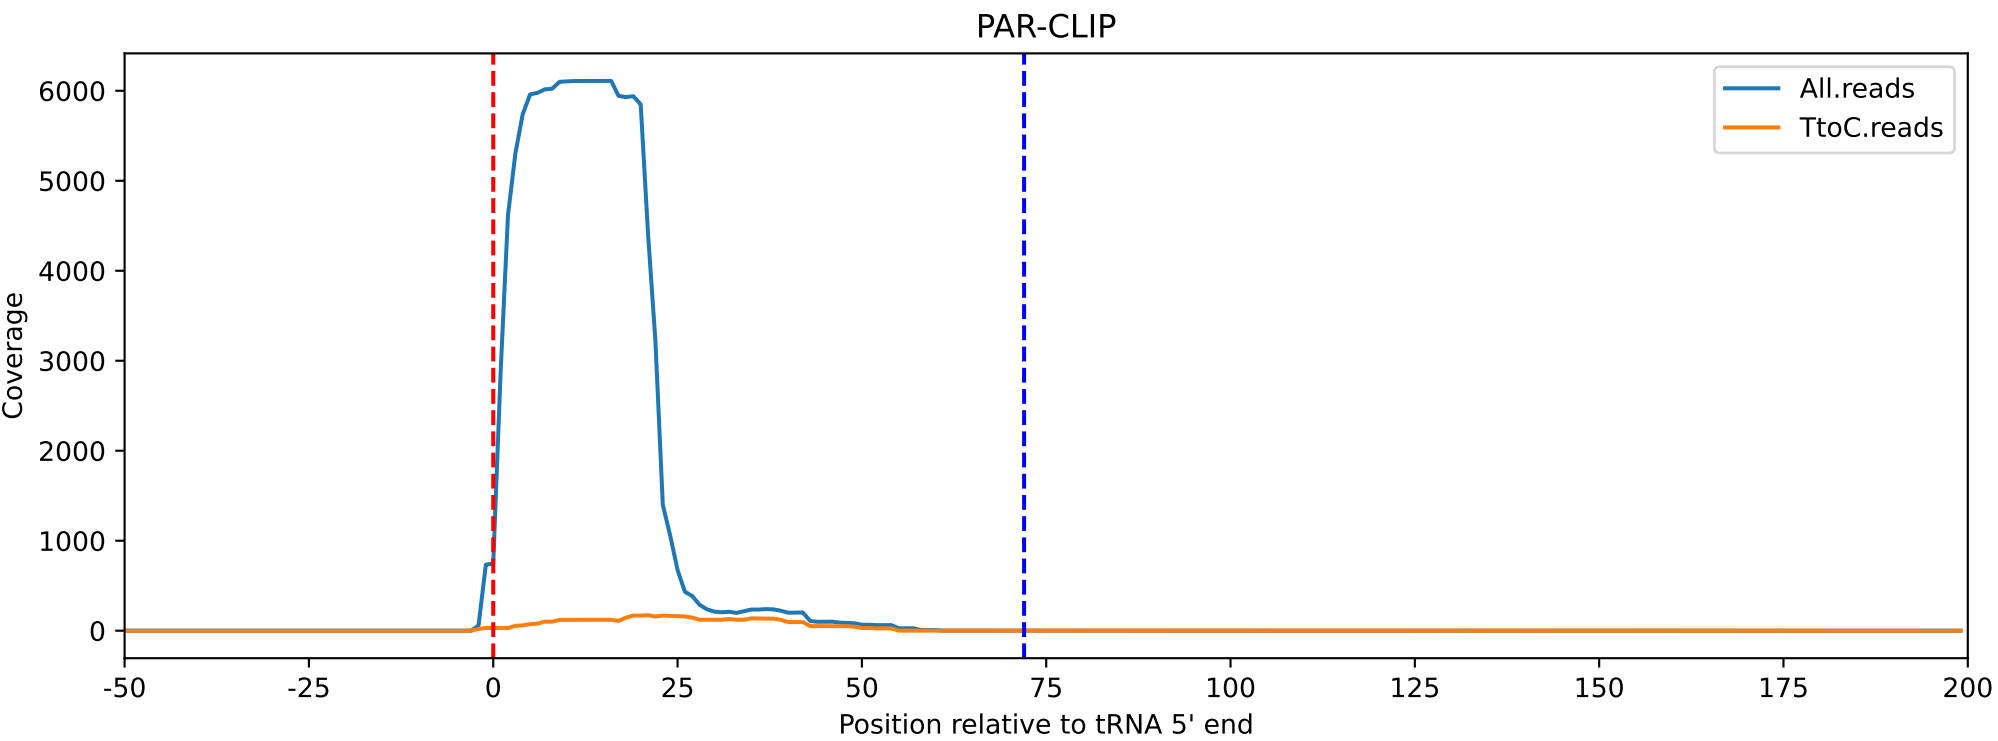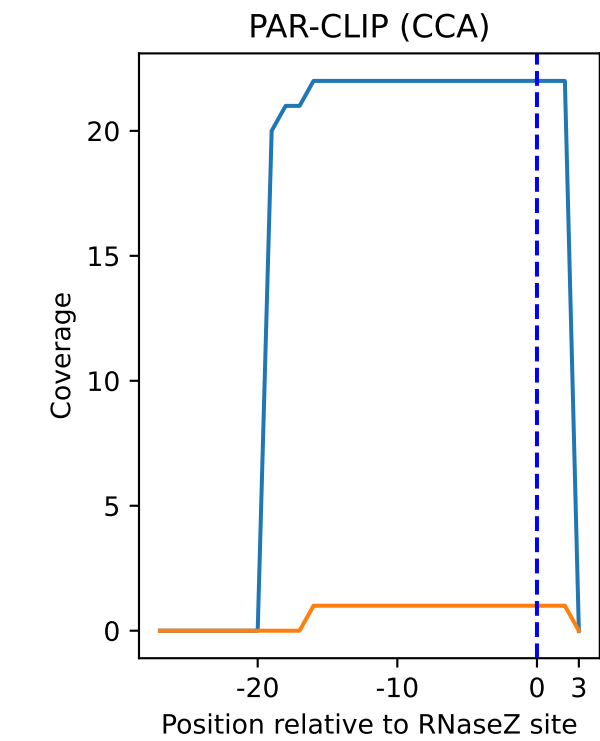



# tRNA-Arg-ACG-1-5

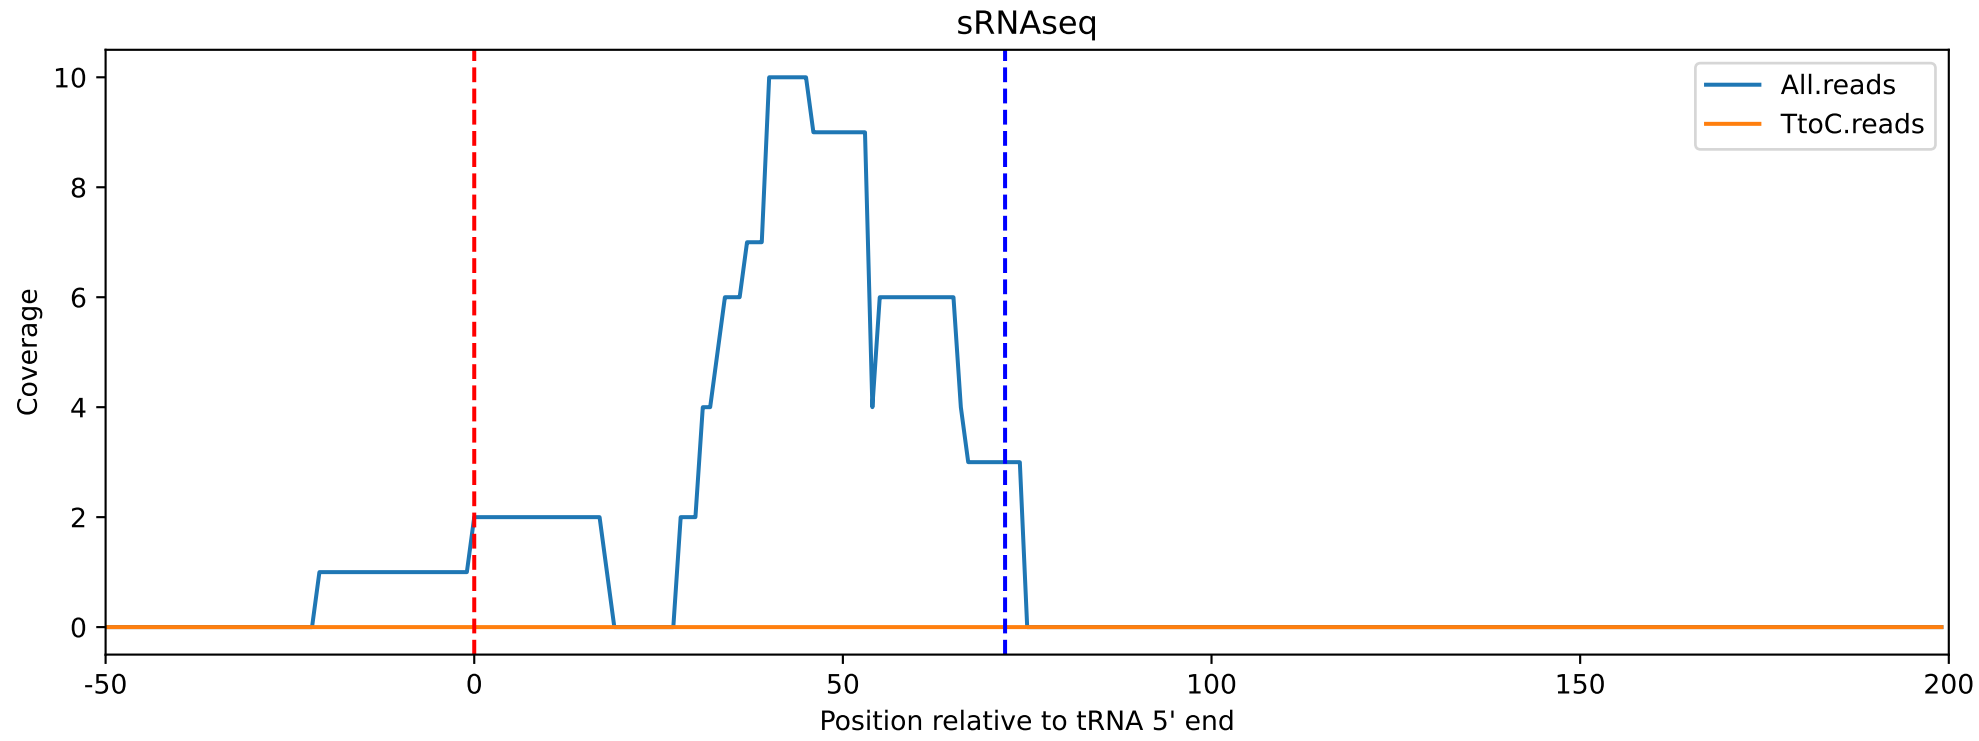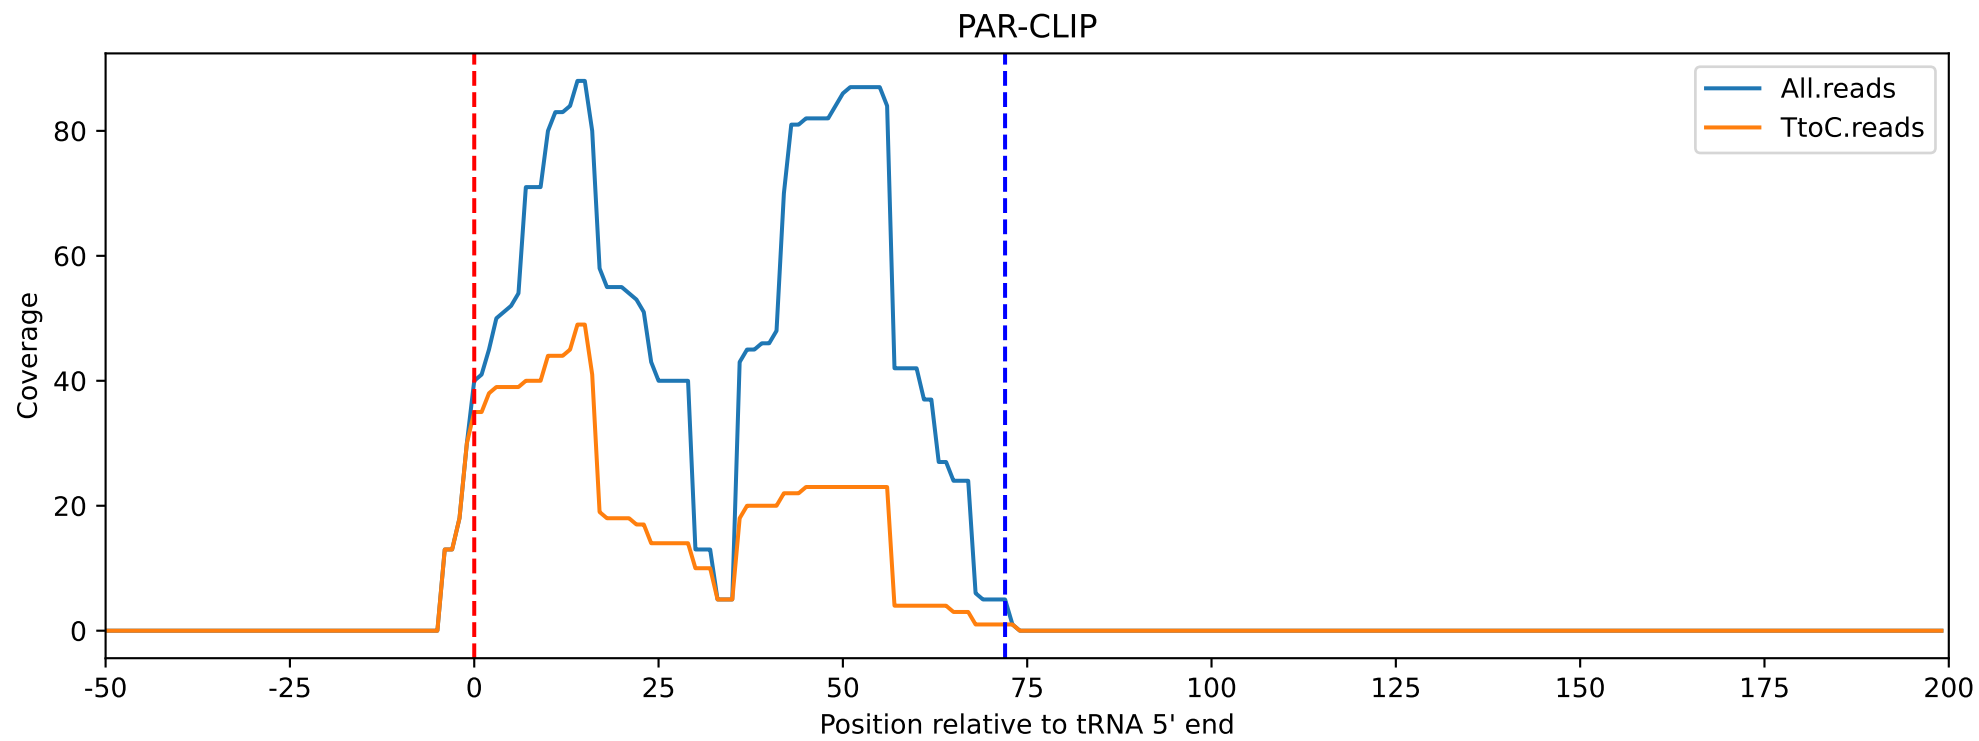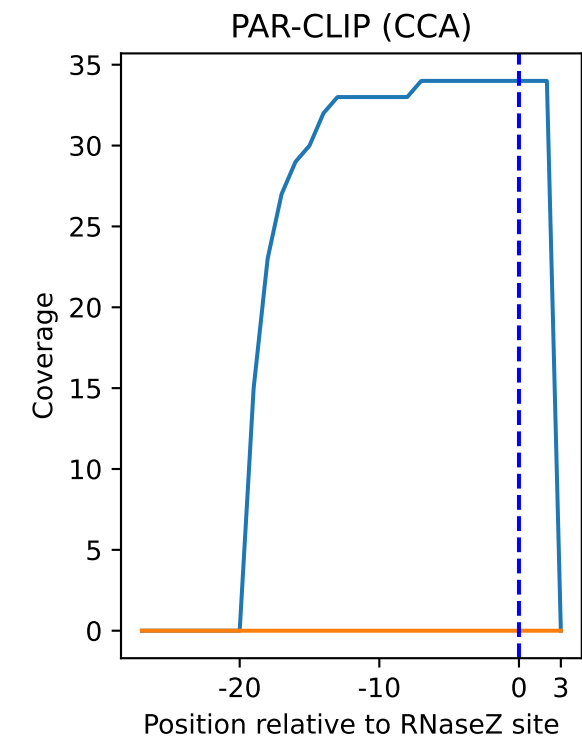

# tRNA-Thr-TGT-2-4

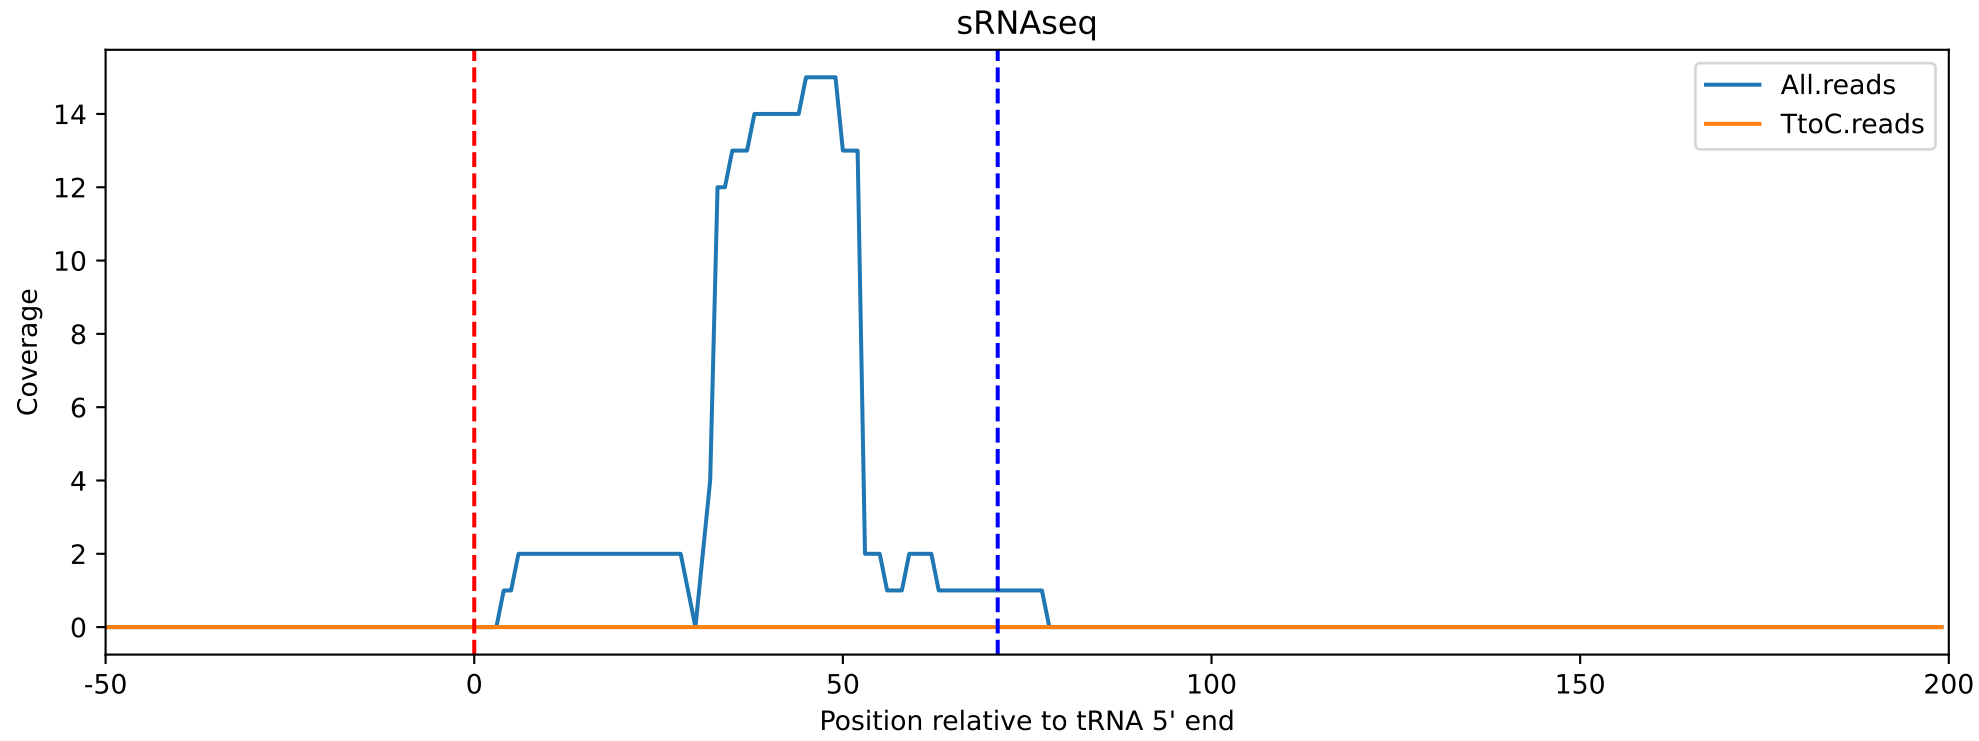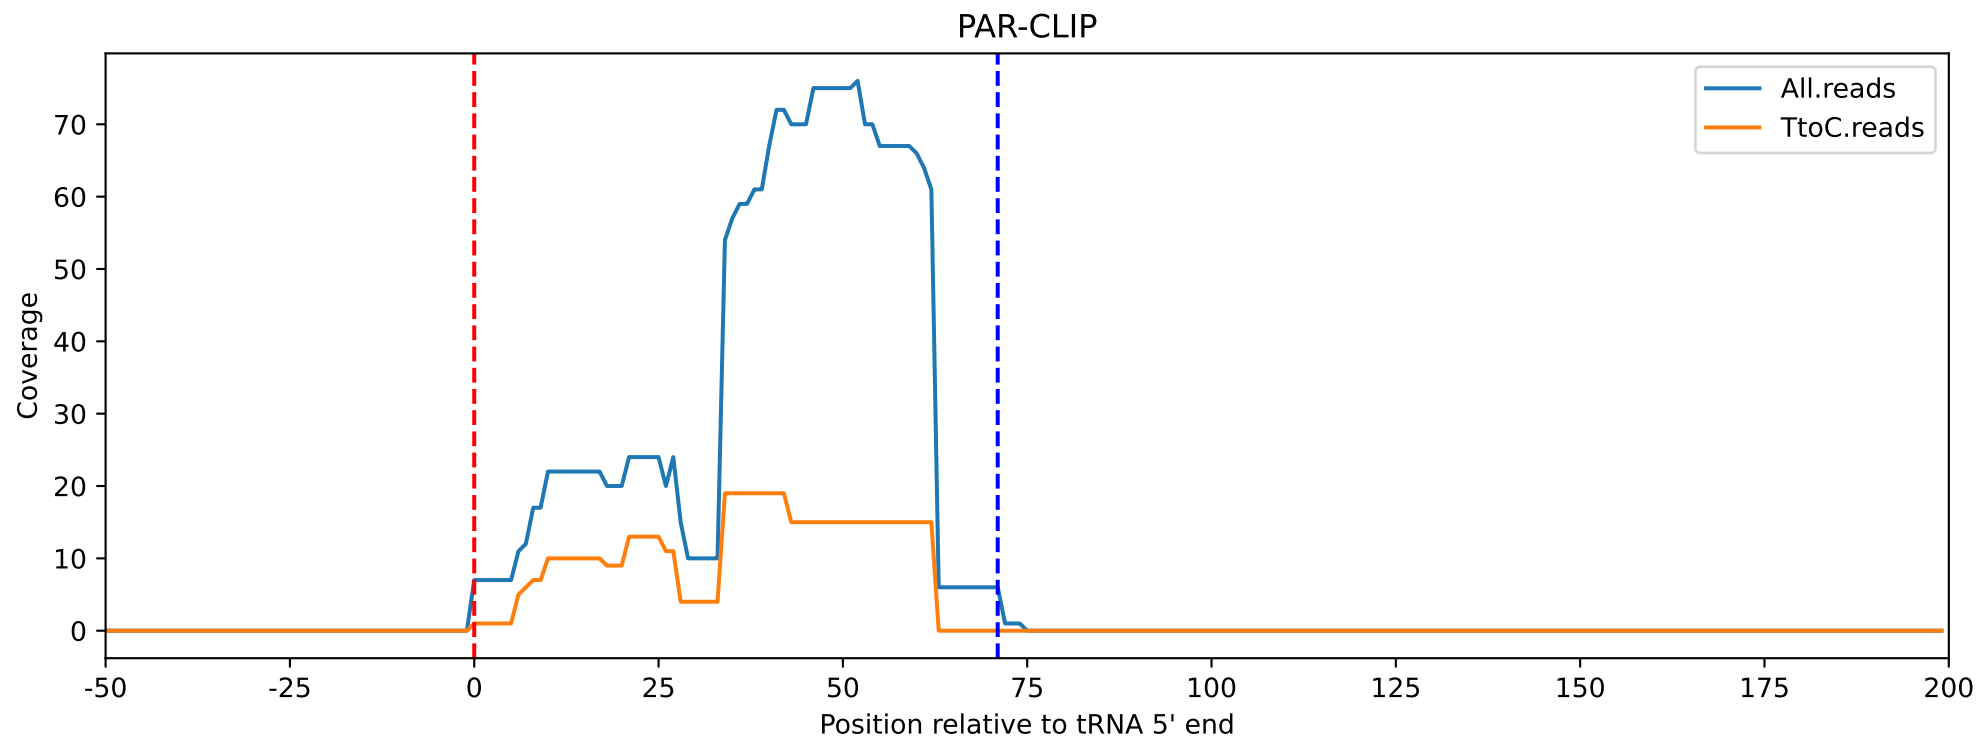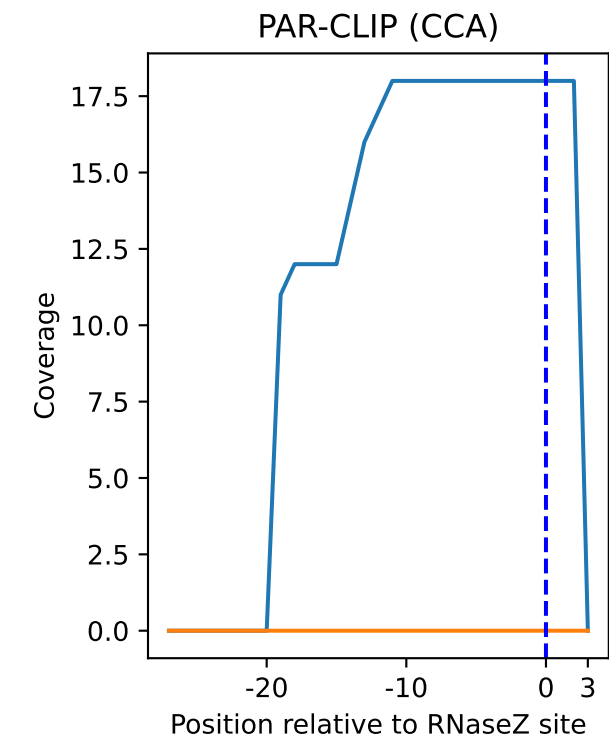

# tRNA-His-GTG-1-1

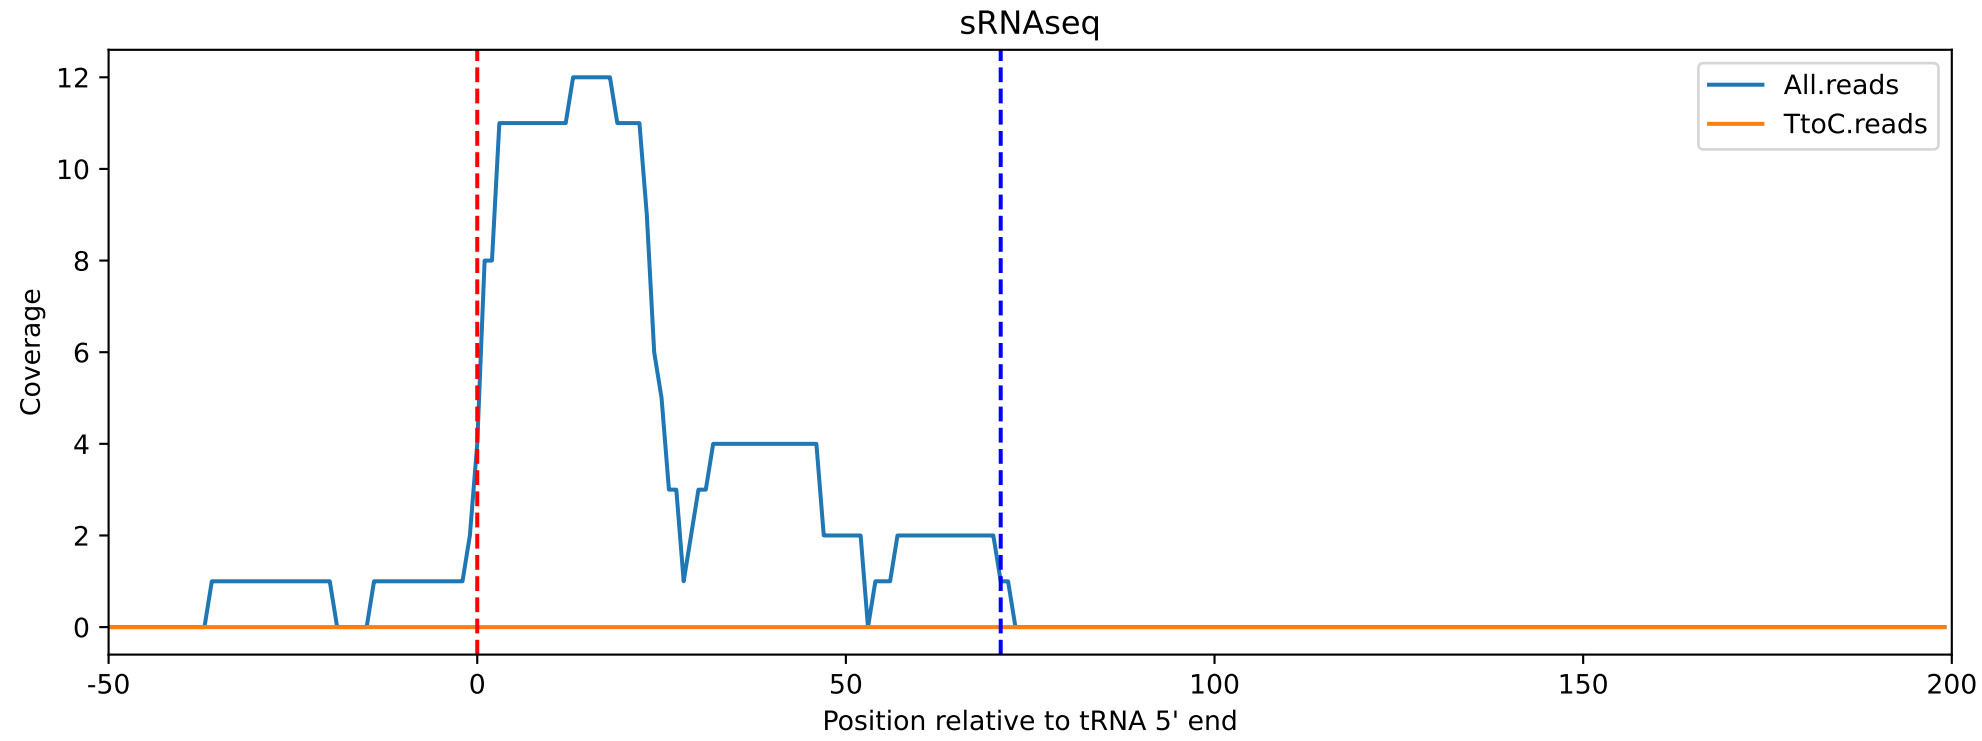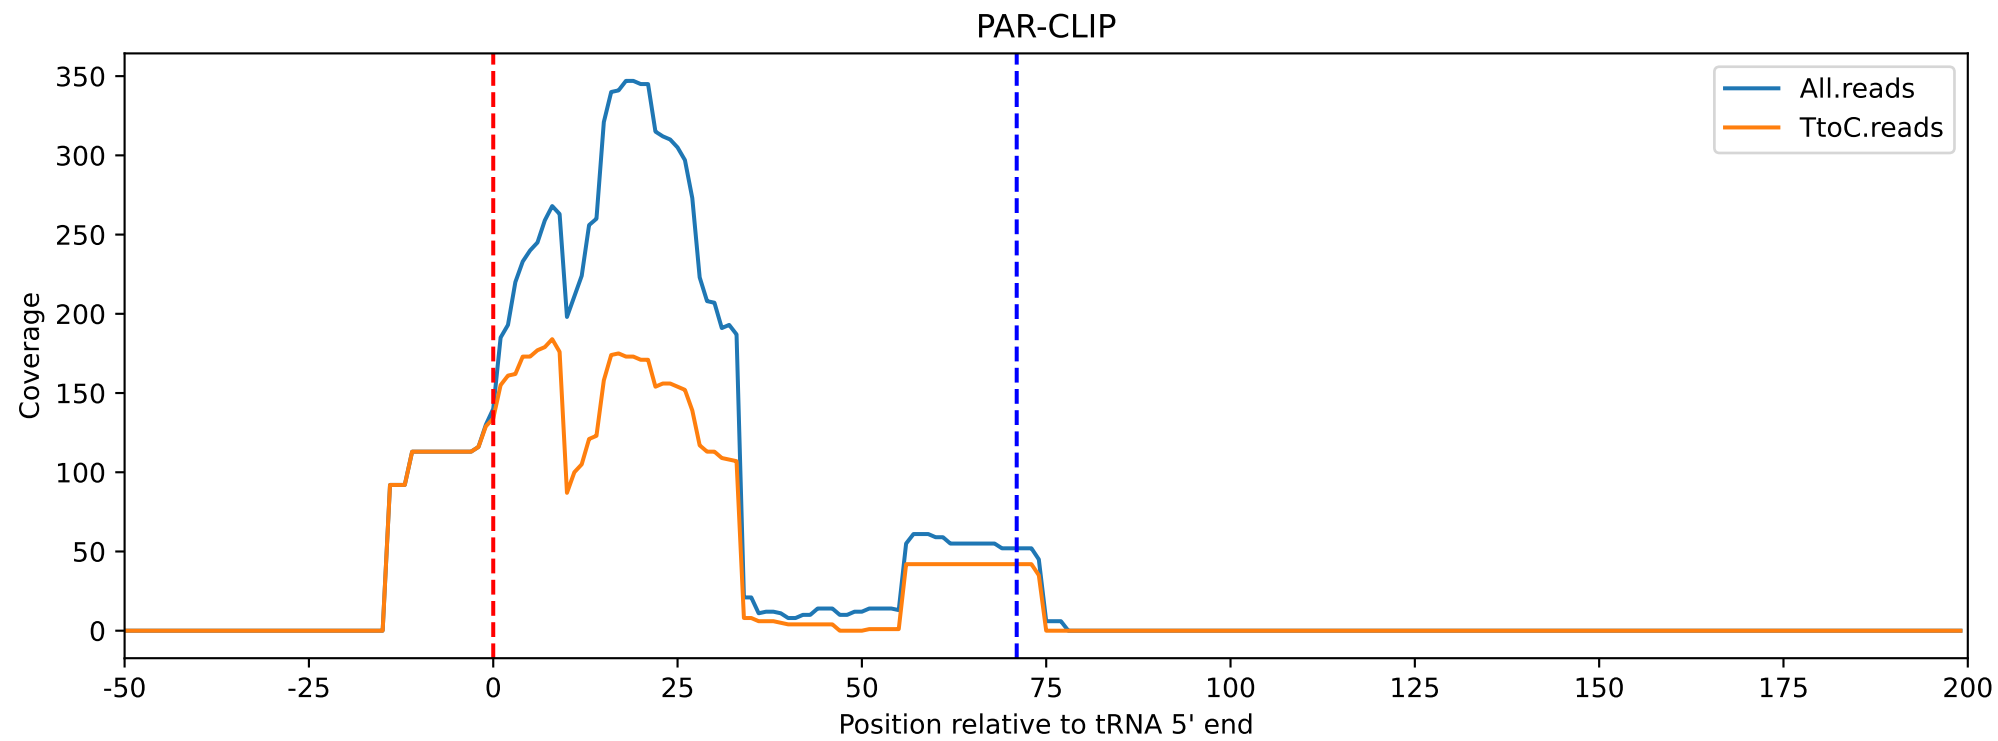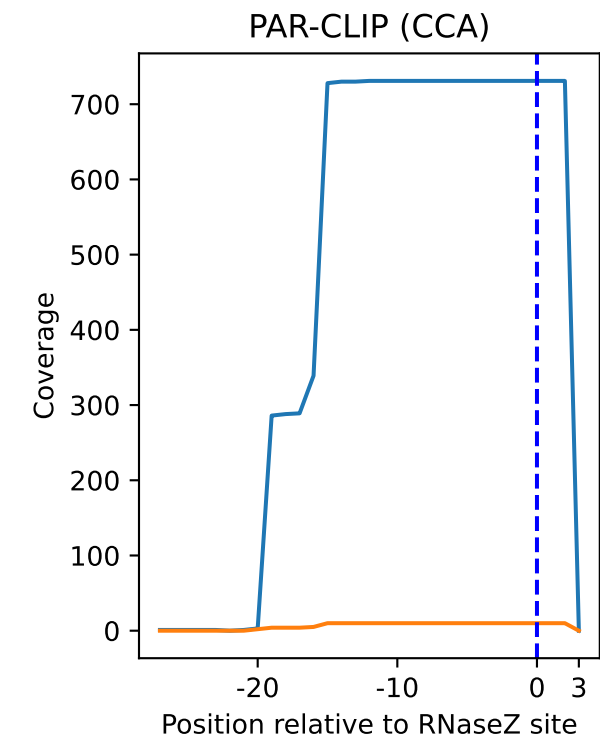

# tRNA-iMet-CAT-1-1

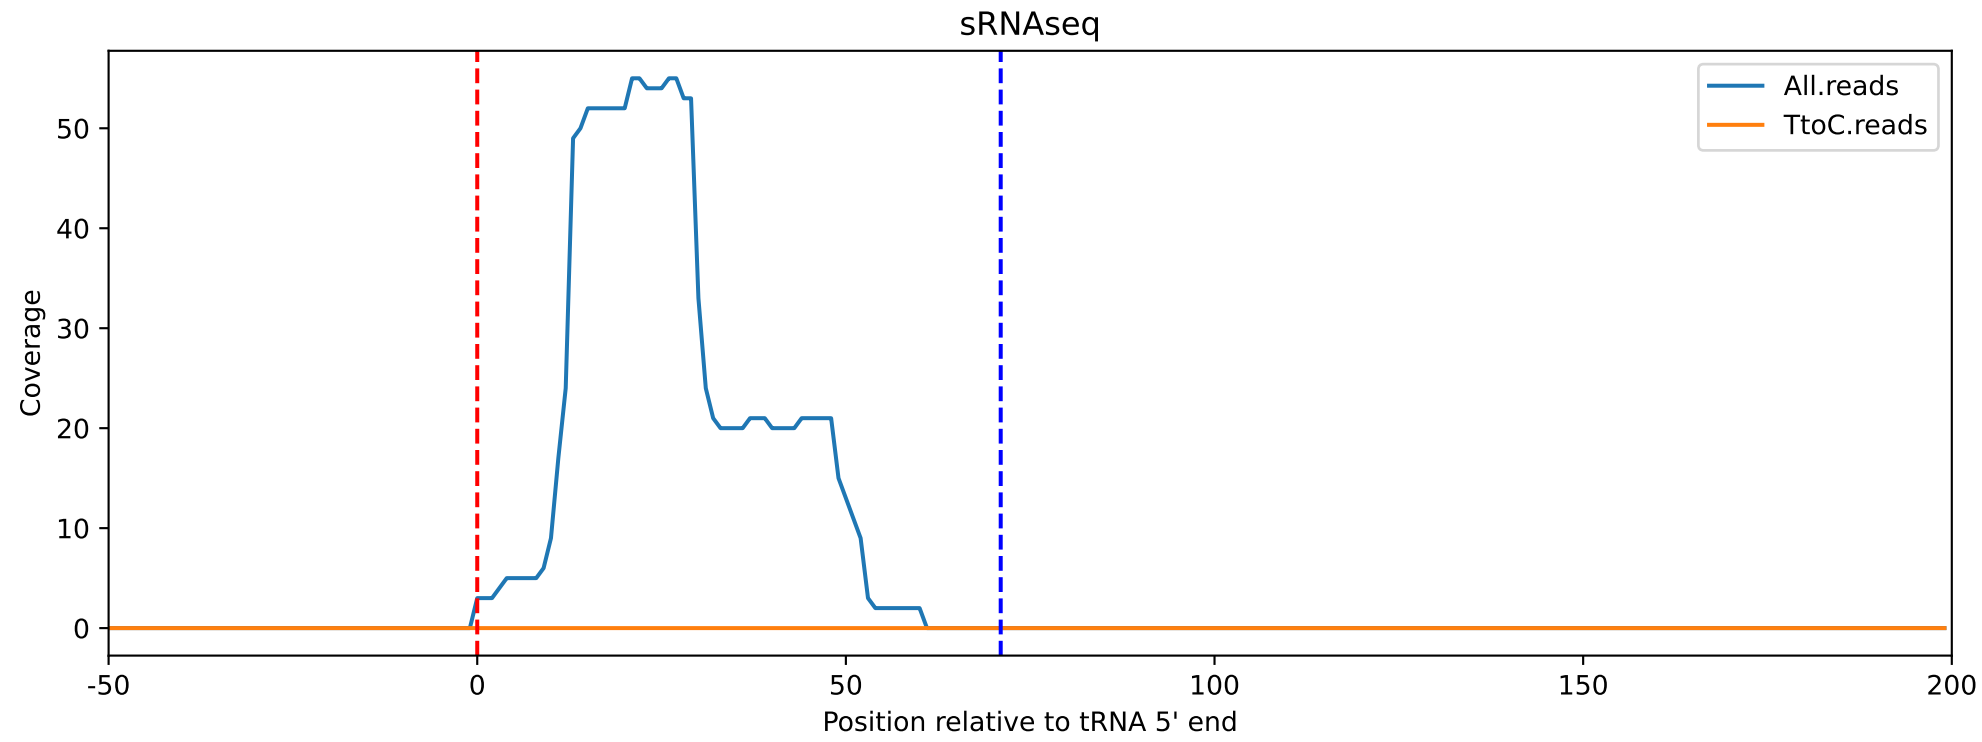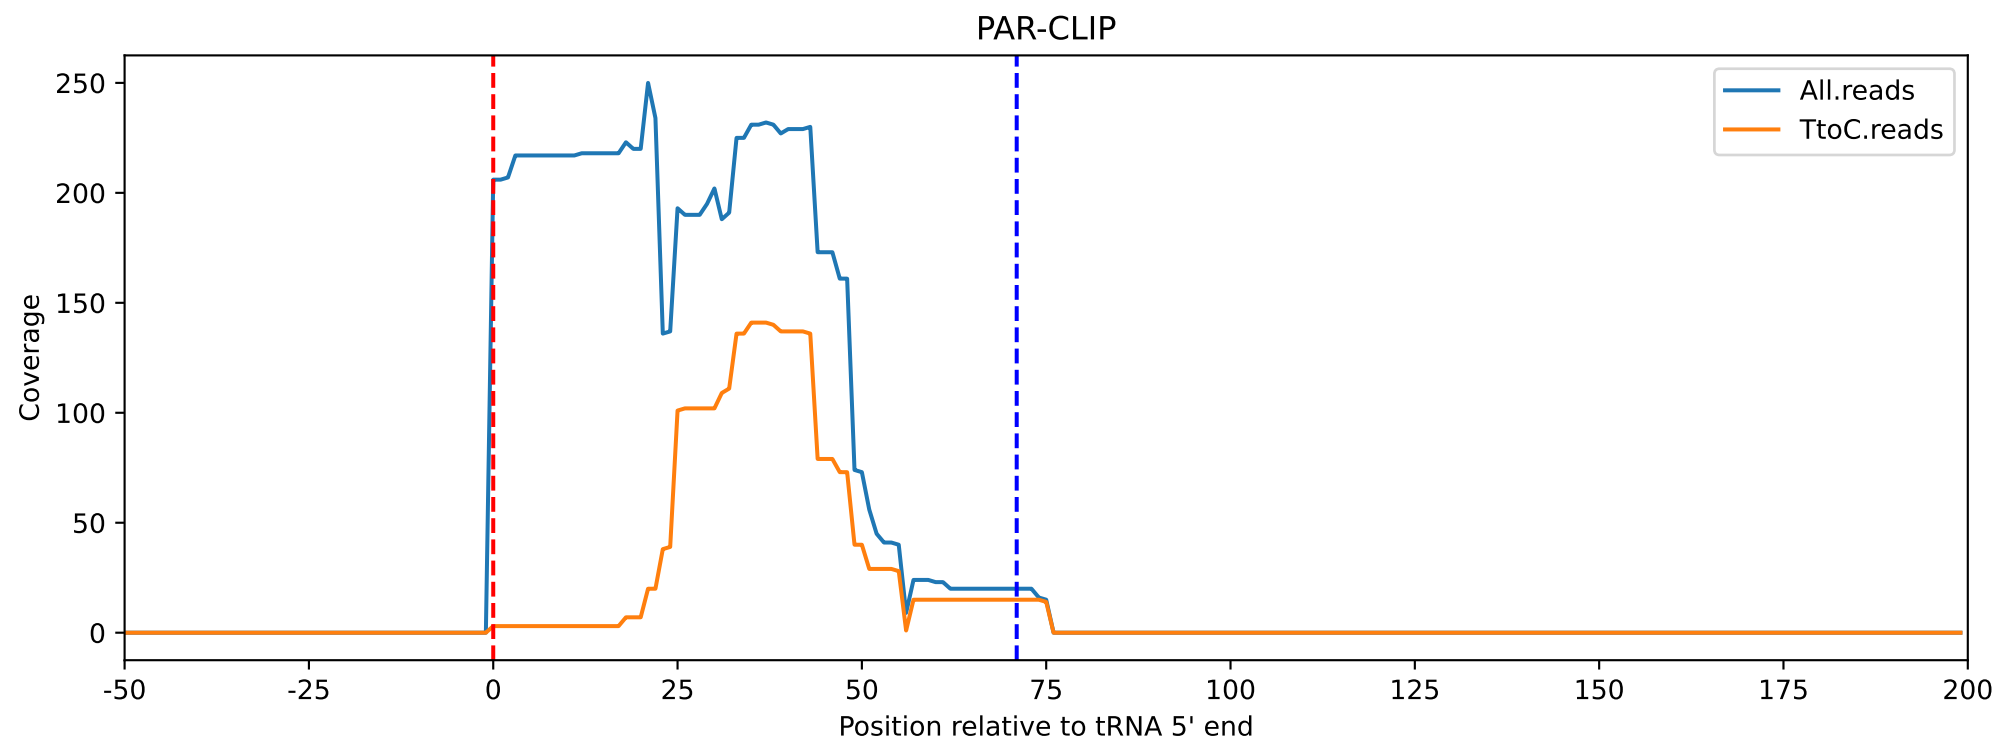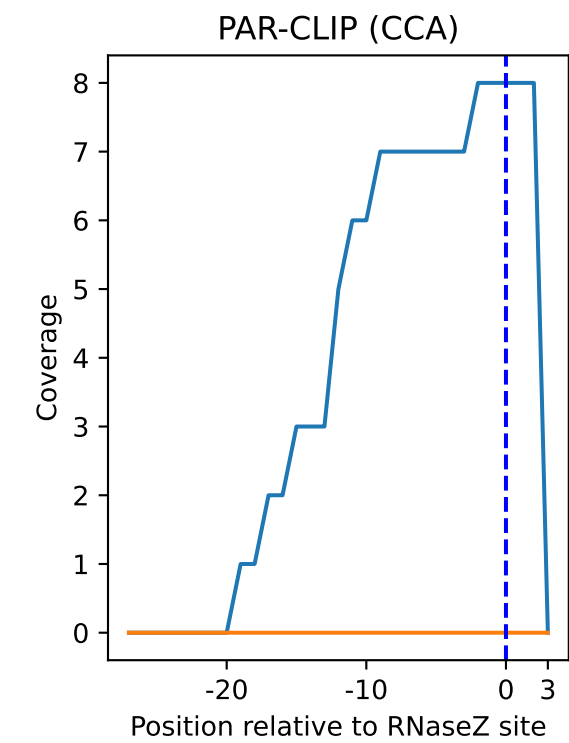

# tRNA-Glu-CTC-5-1

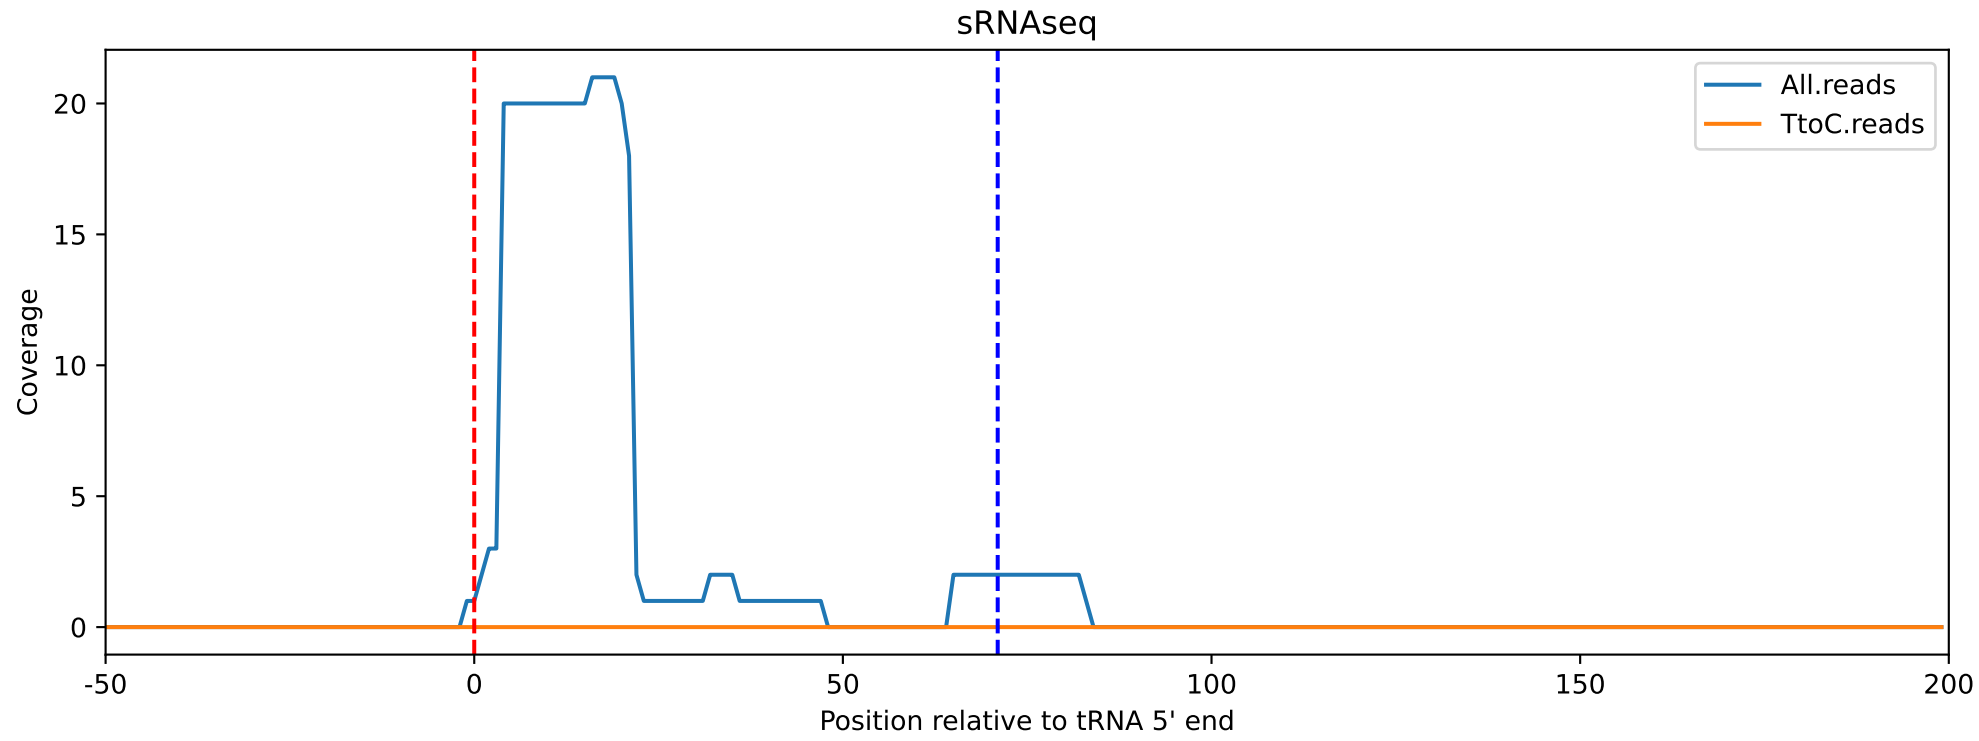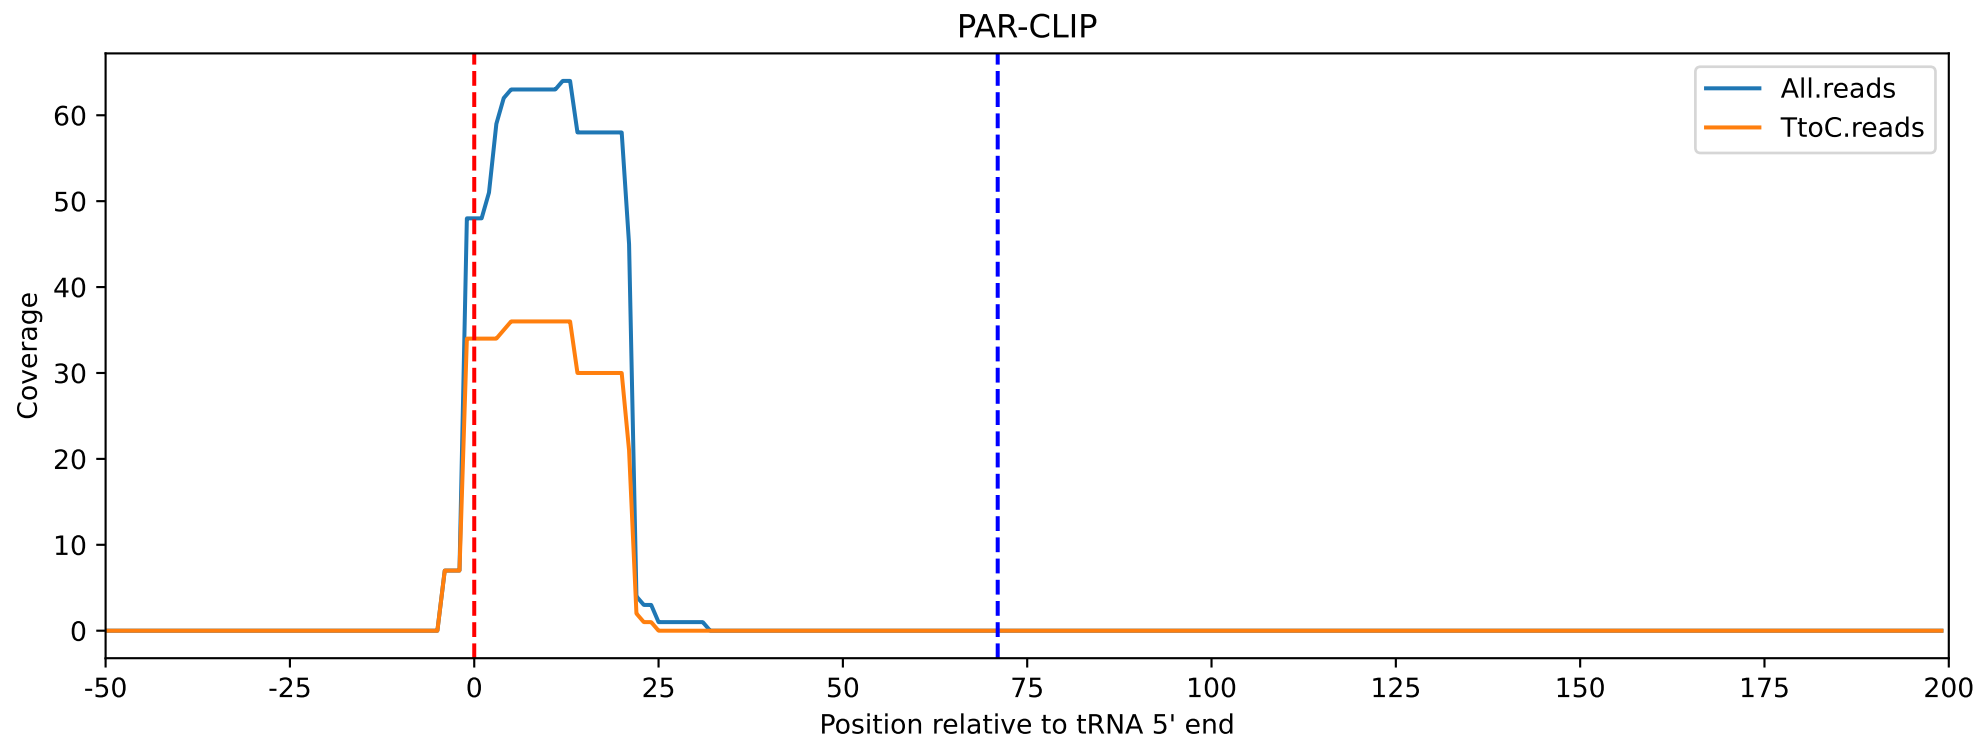

# tRNA-Trp-CCA-1-2

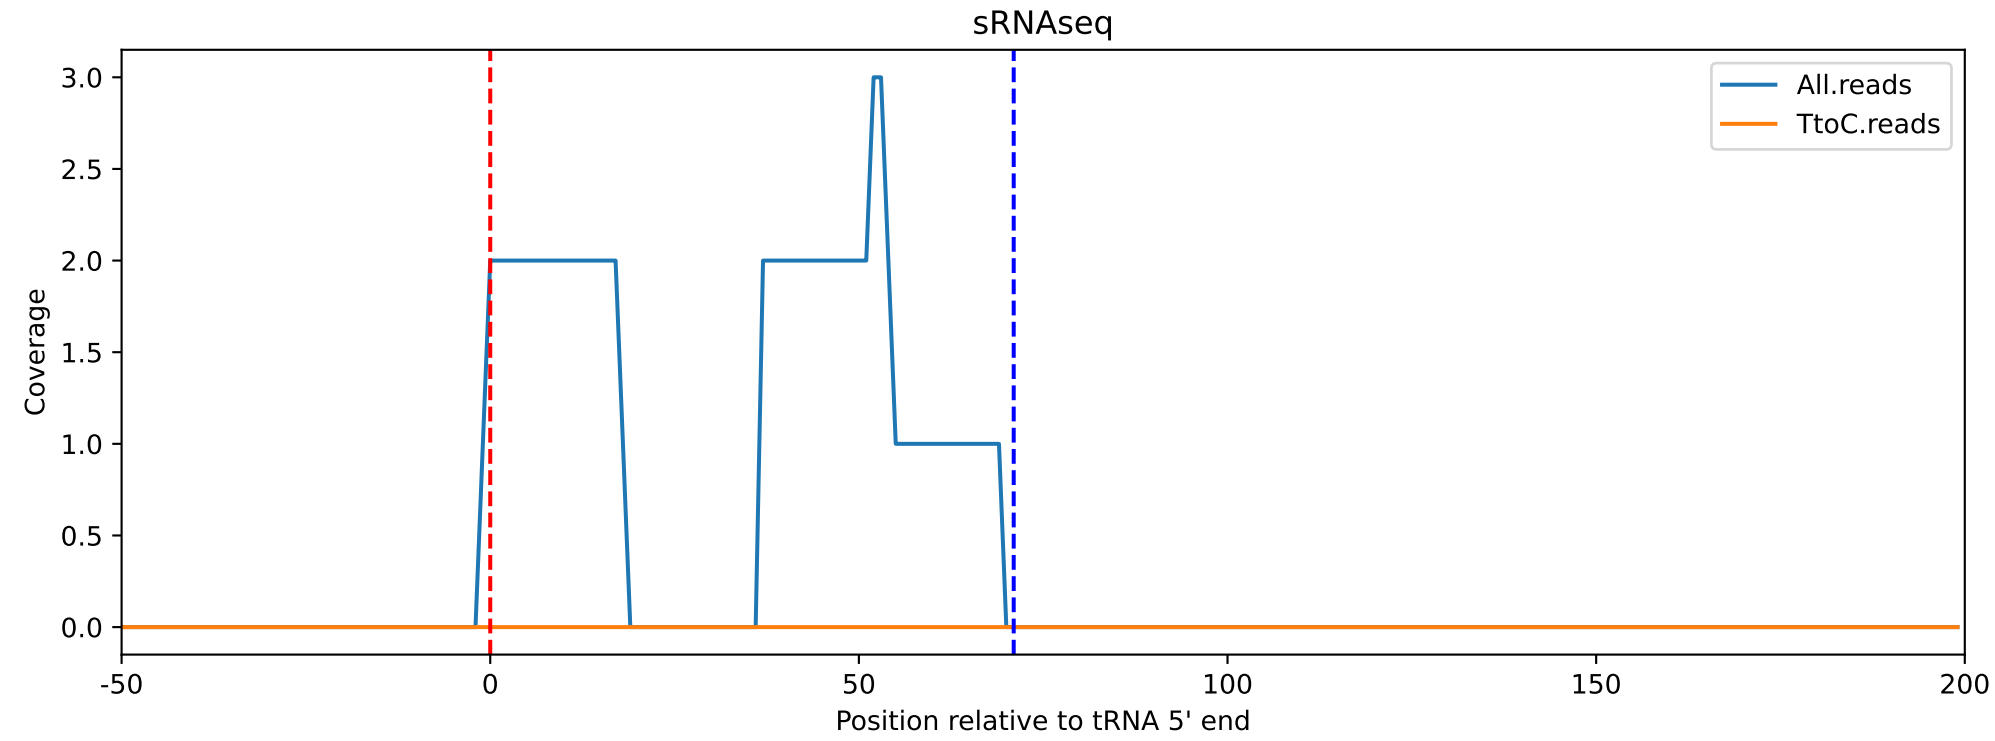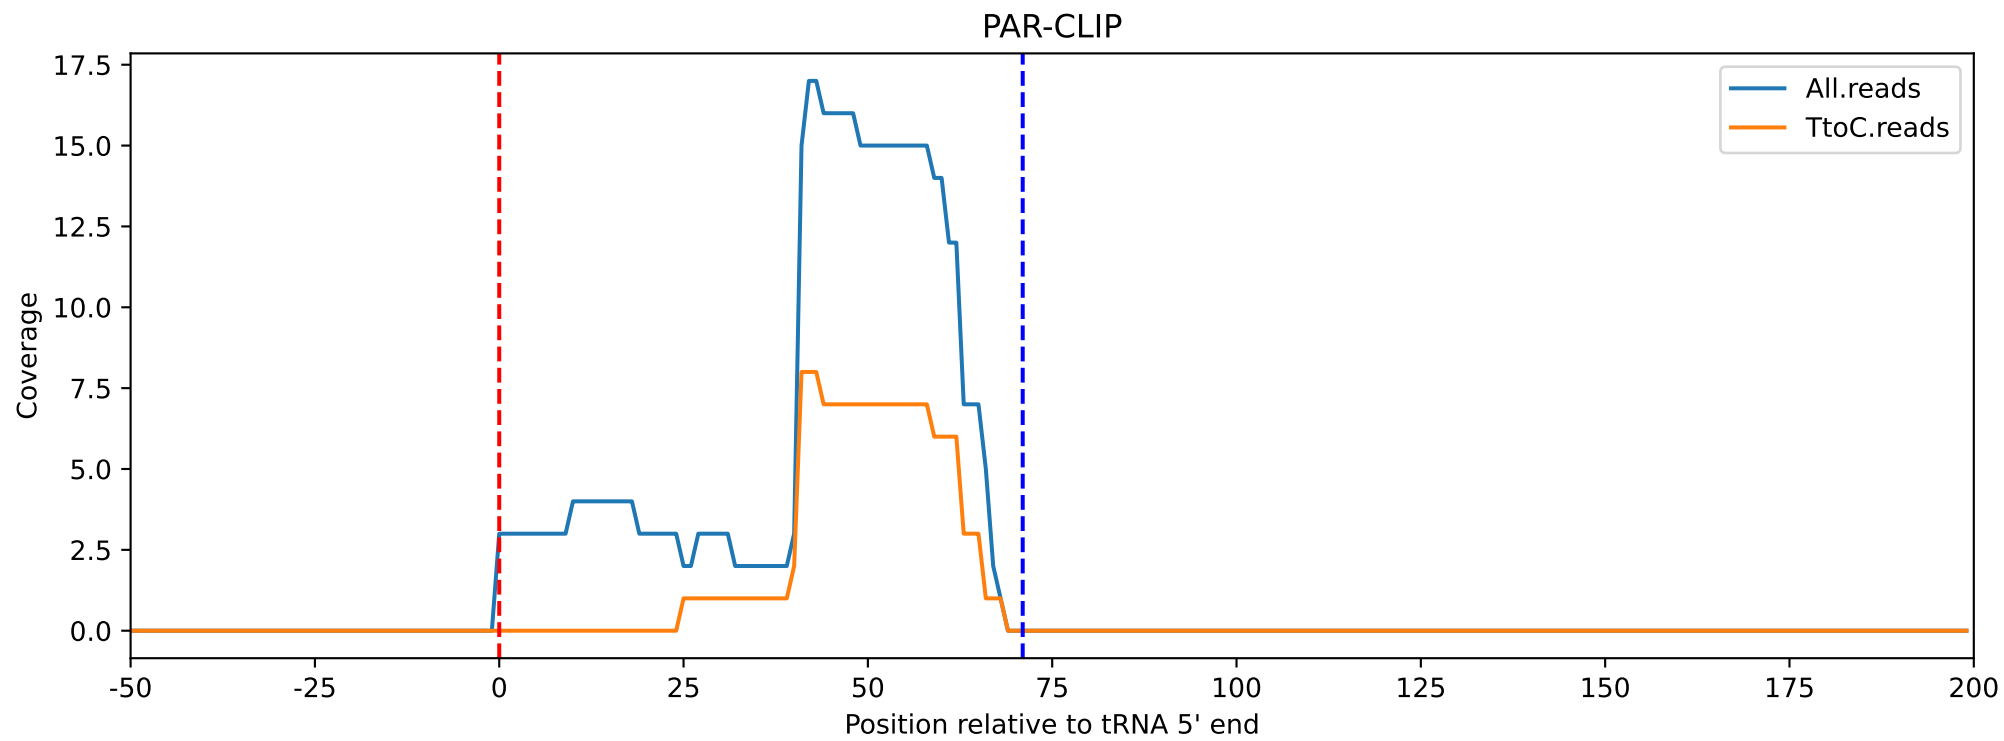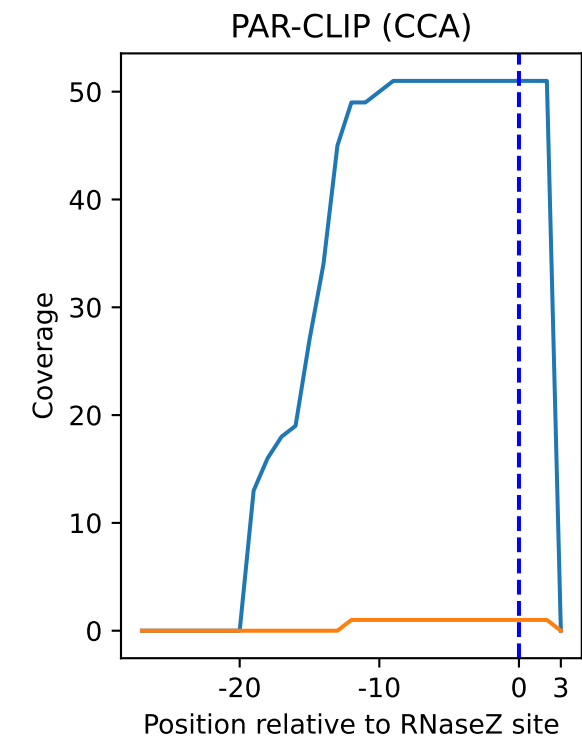

# tRNA-Trp-CCA-2-3

## sRNAseq

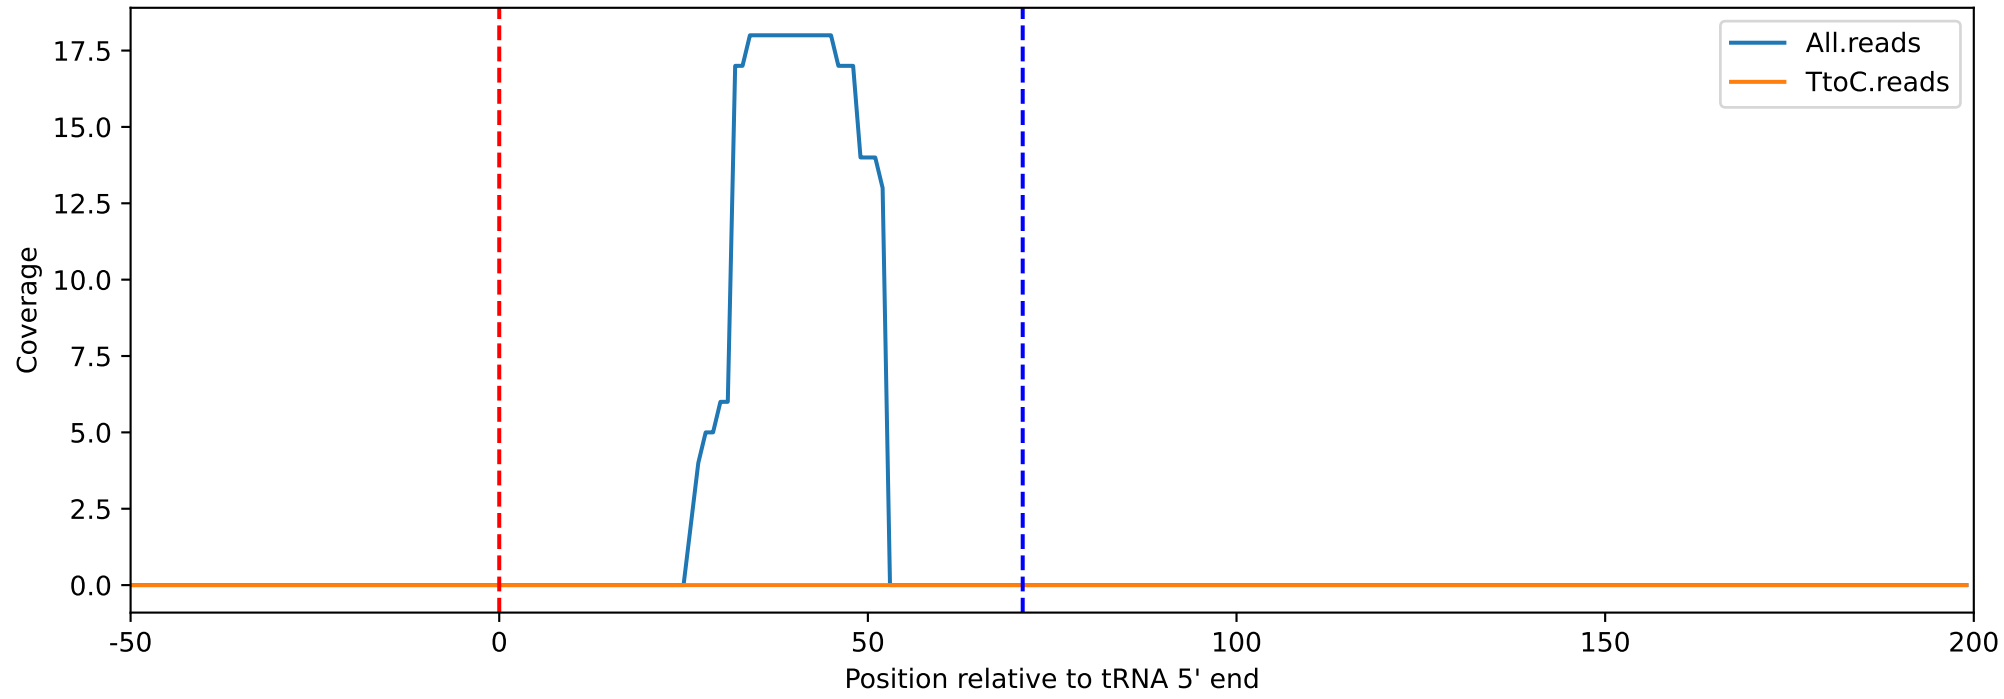

## sRNAseq (CCA)

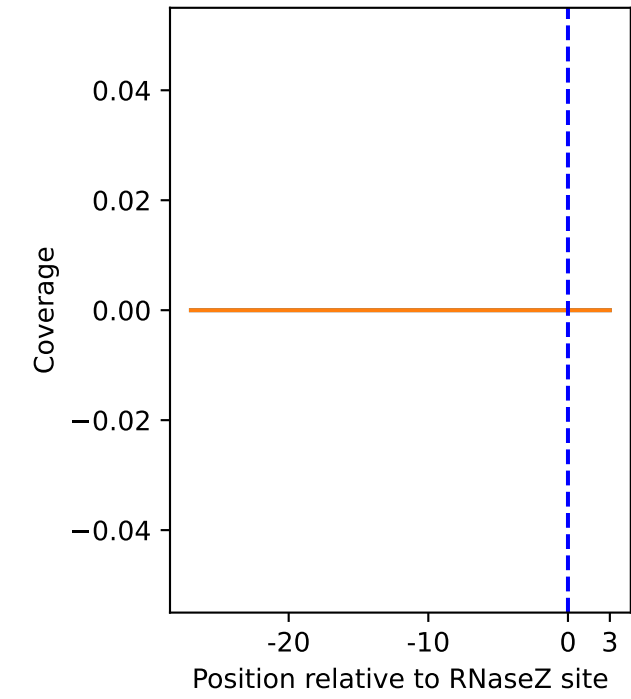

## PAR-CLIP

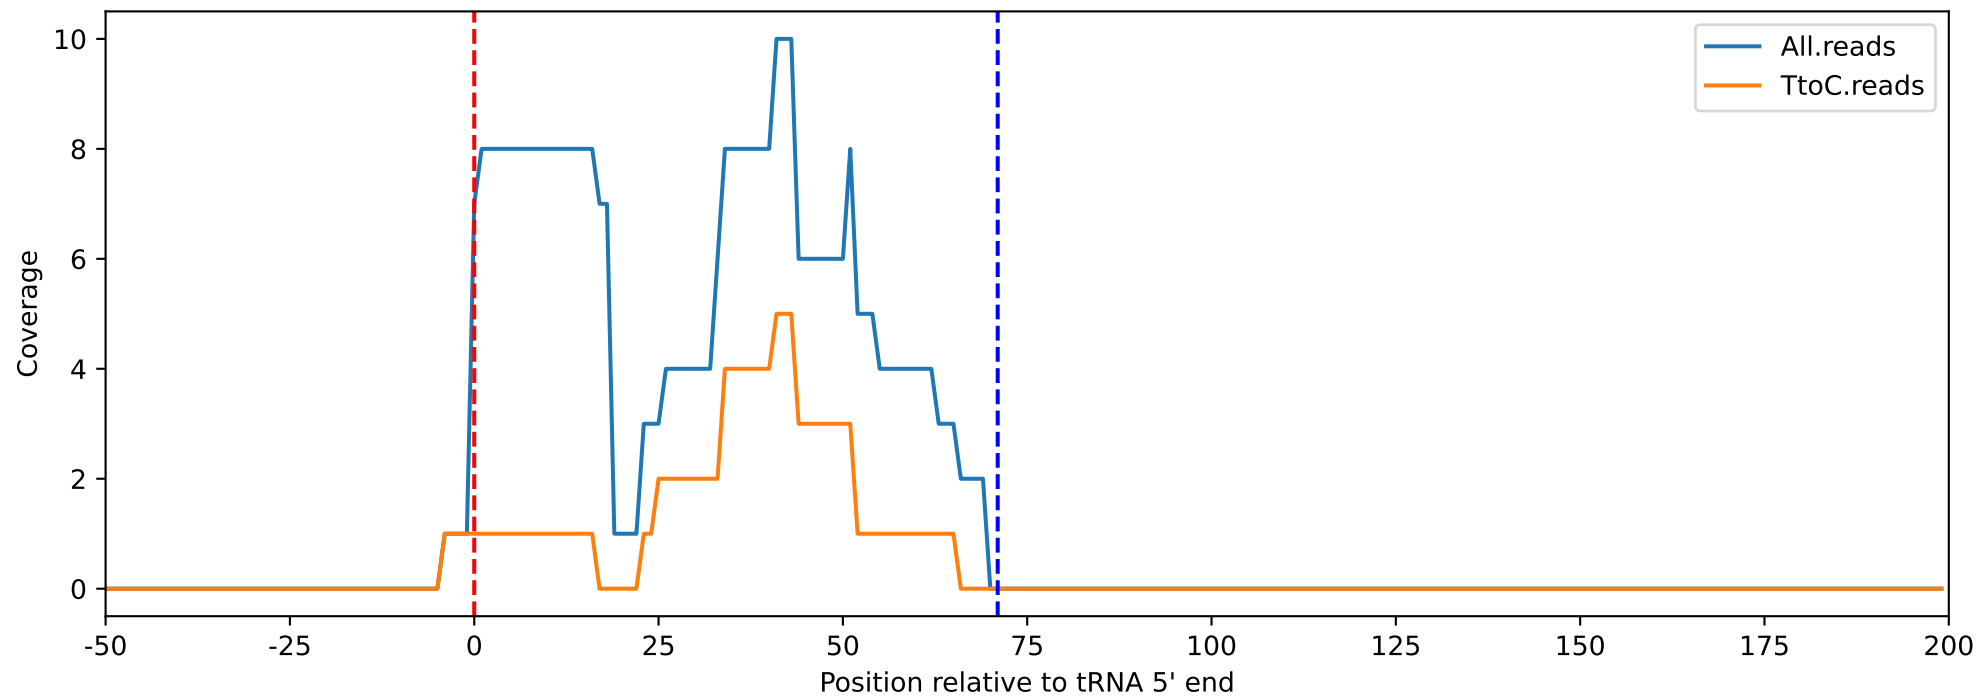

## PAR-CLIP (CCA)

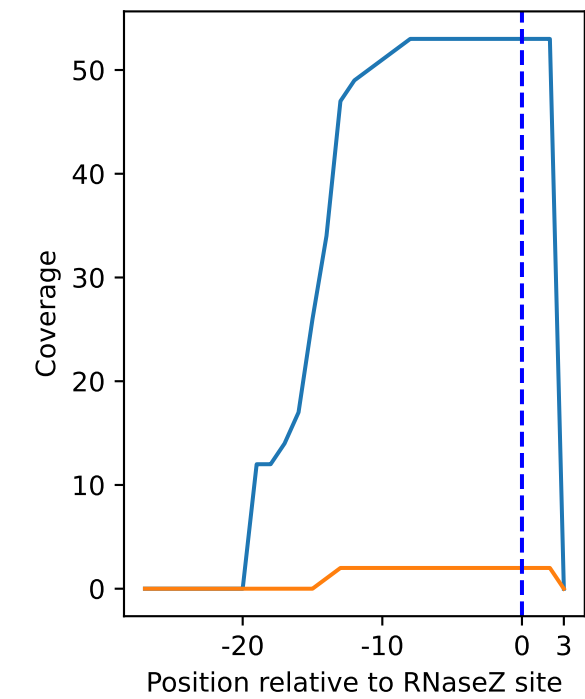

# tRNA-Trp-CCA-2-4

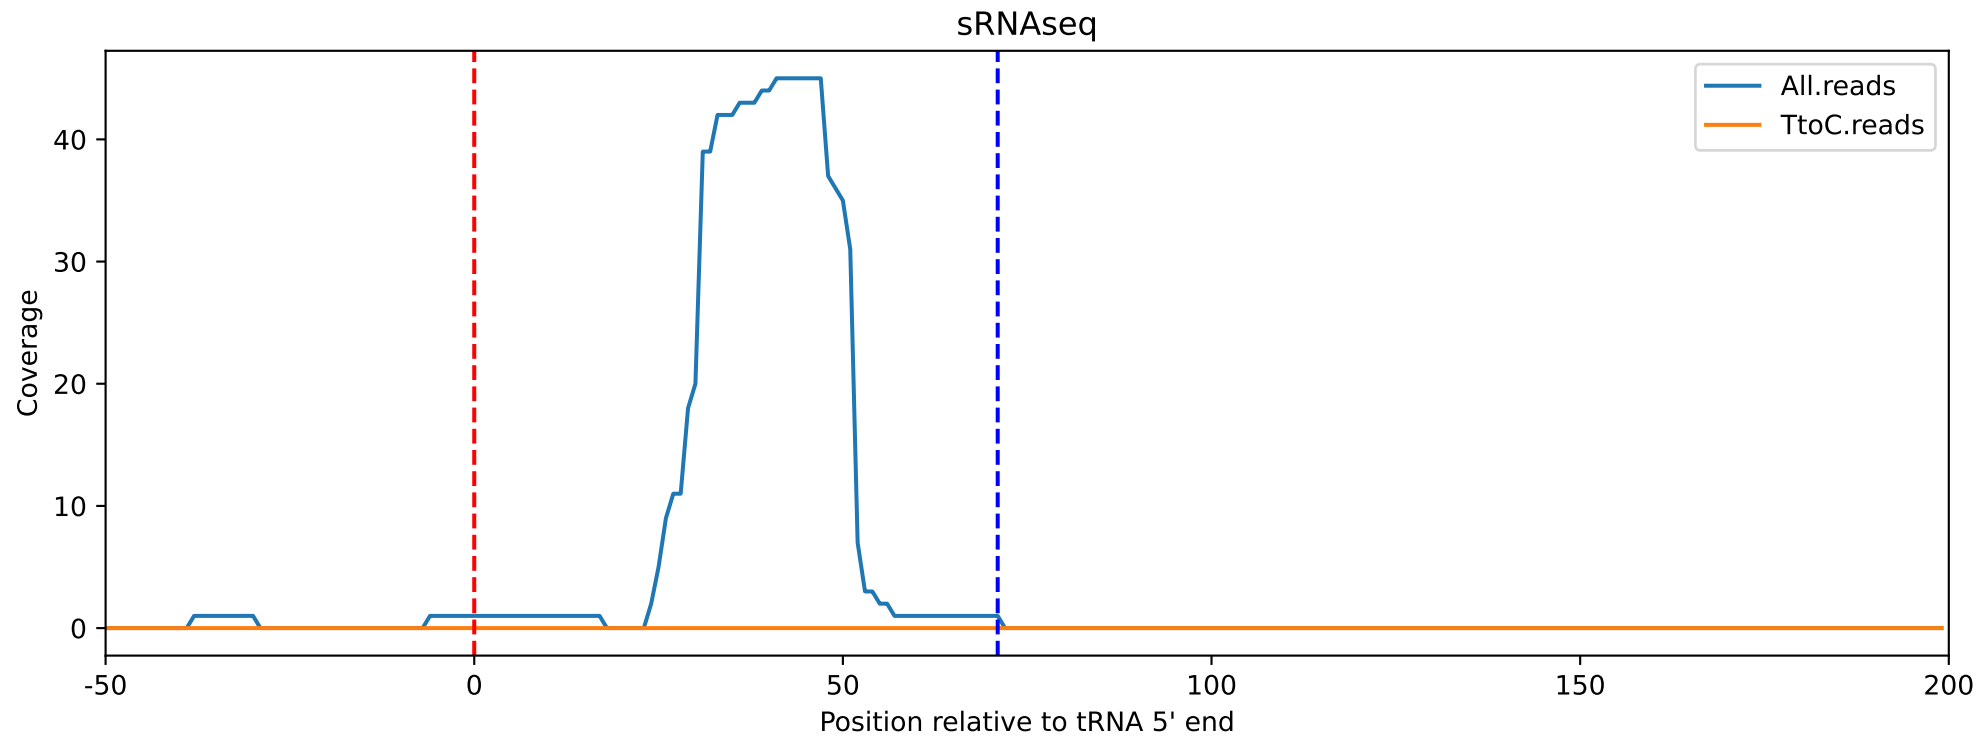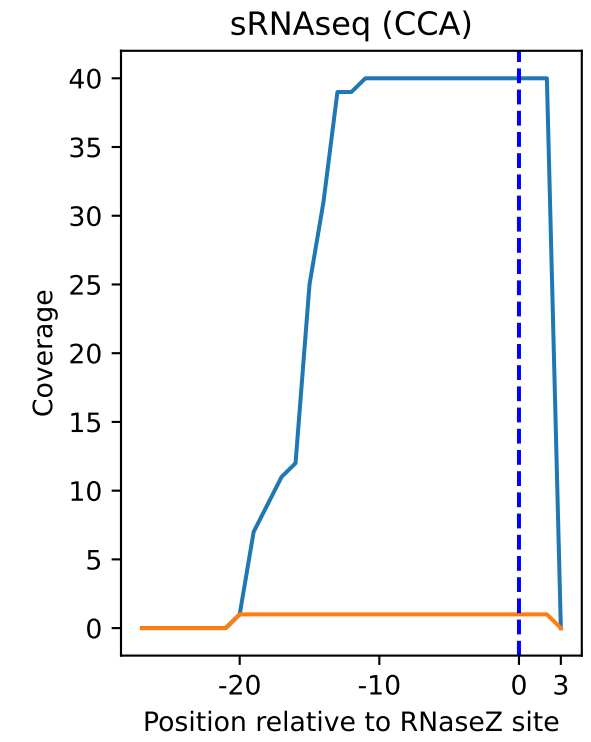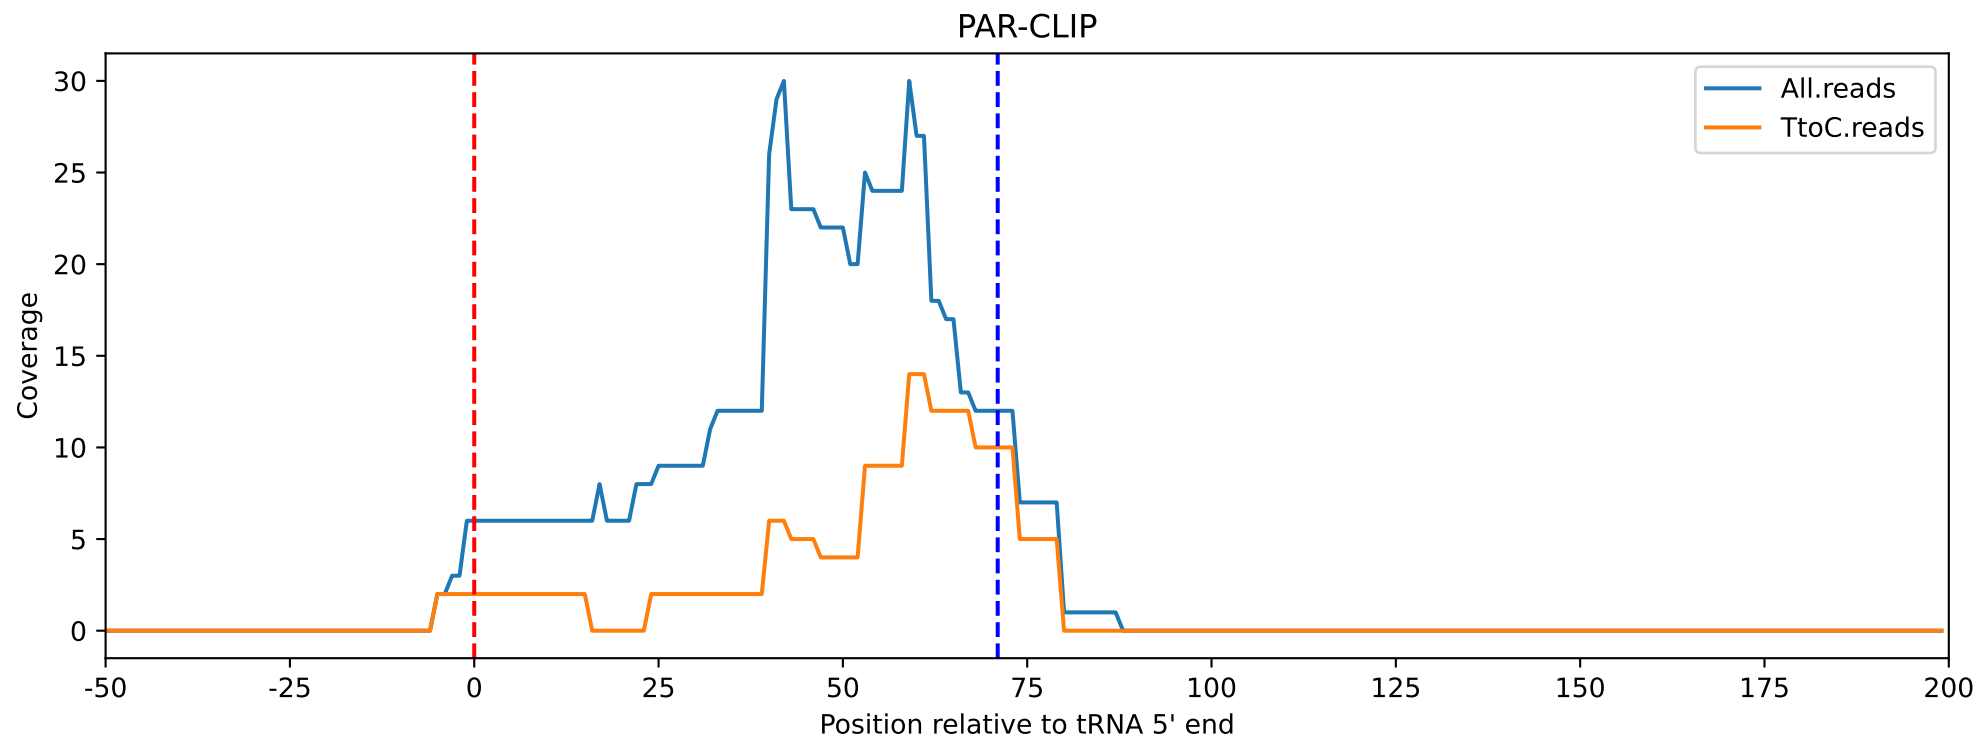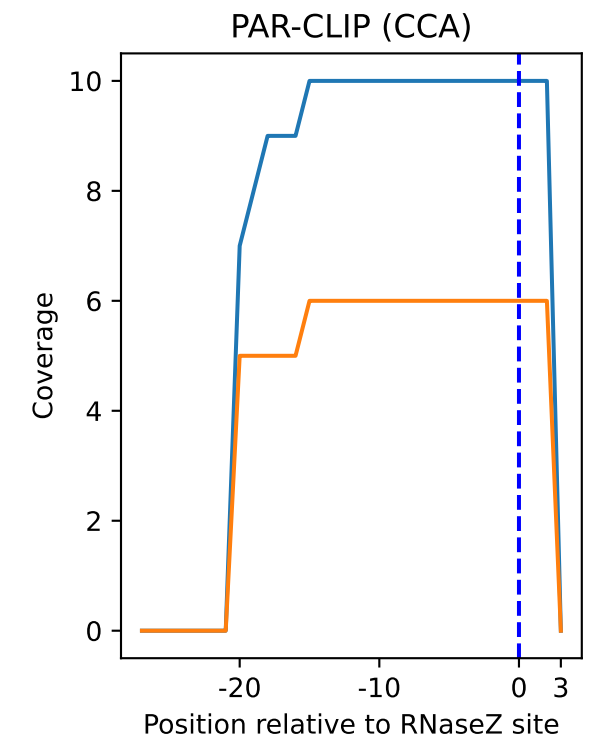



# tRNA-Leu-CAG-1-2

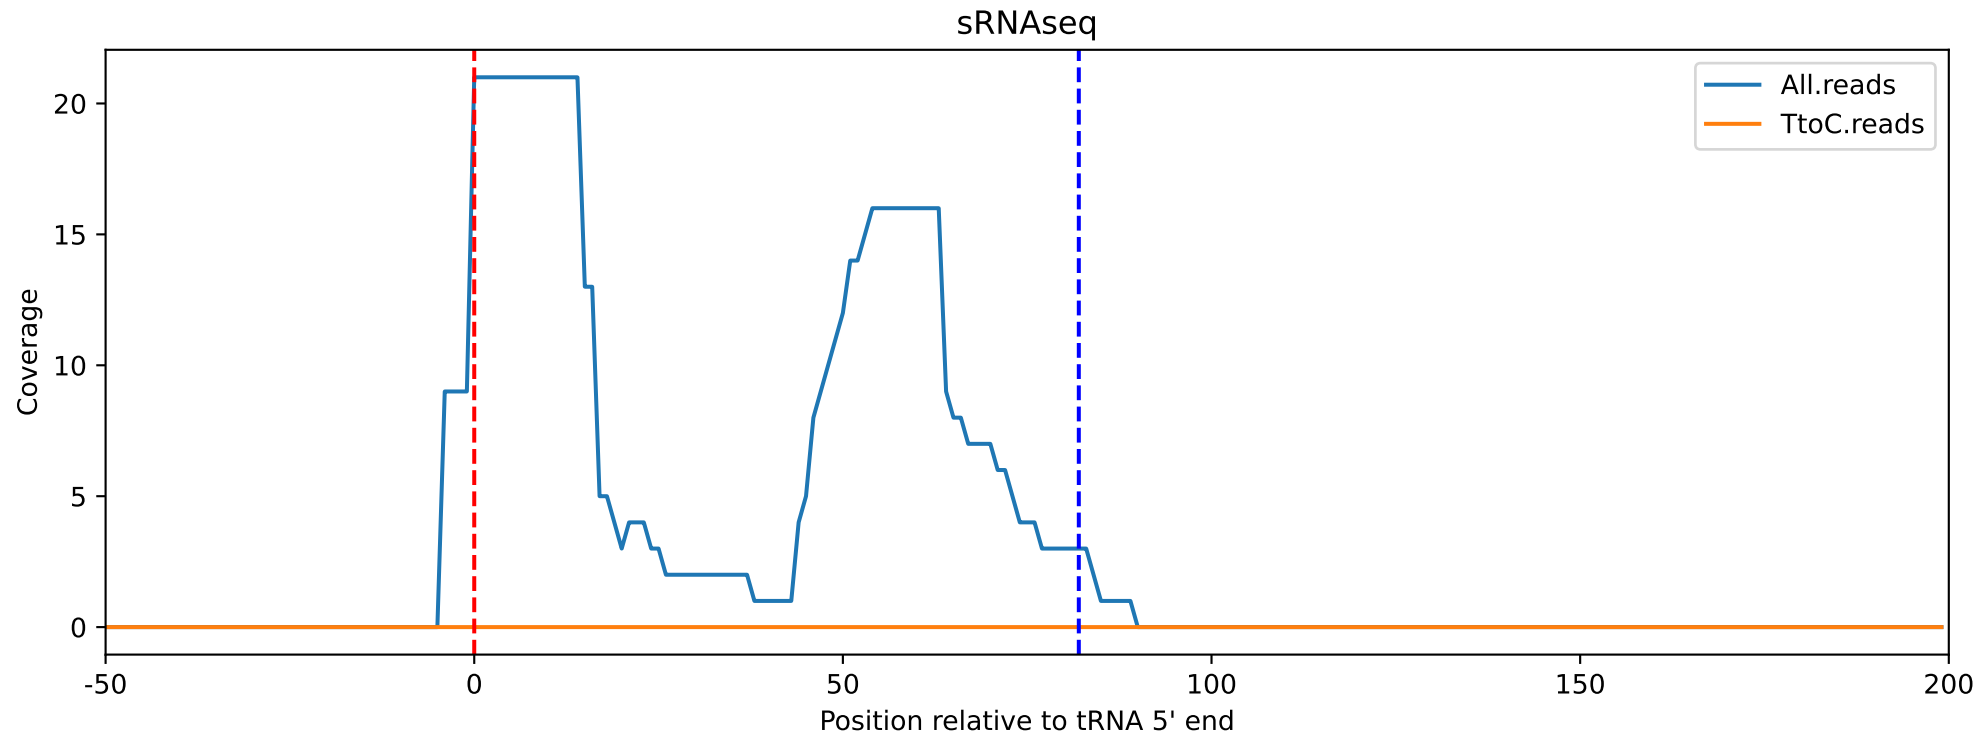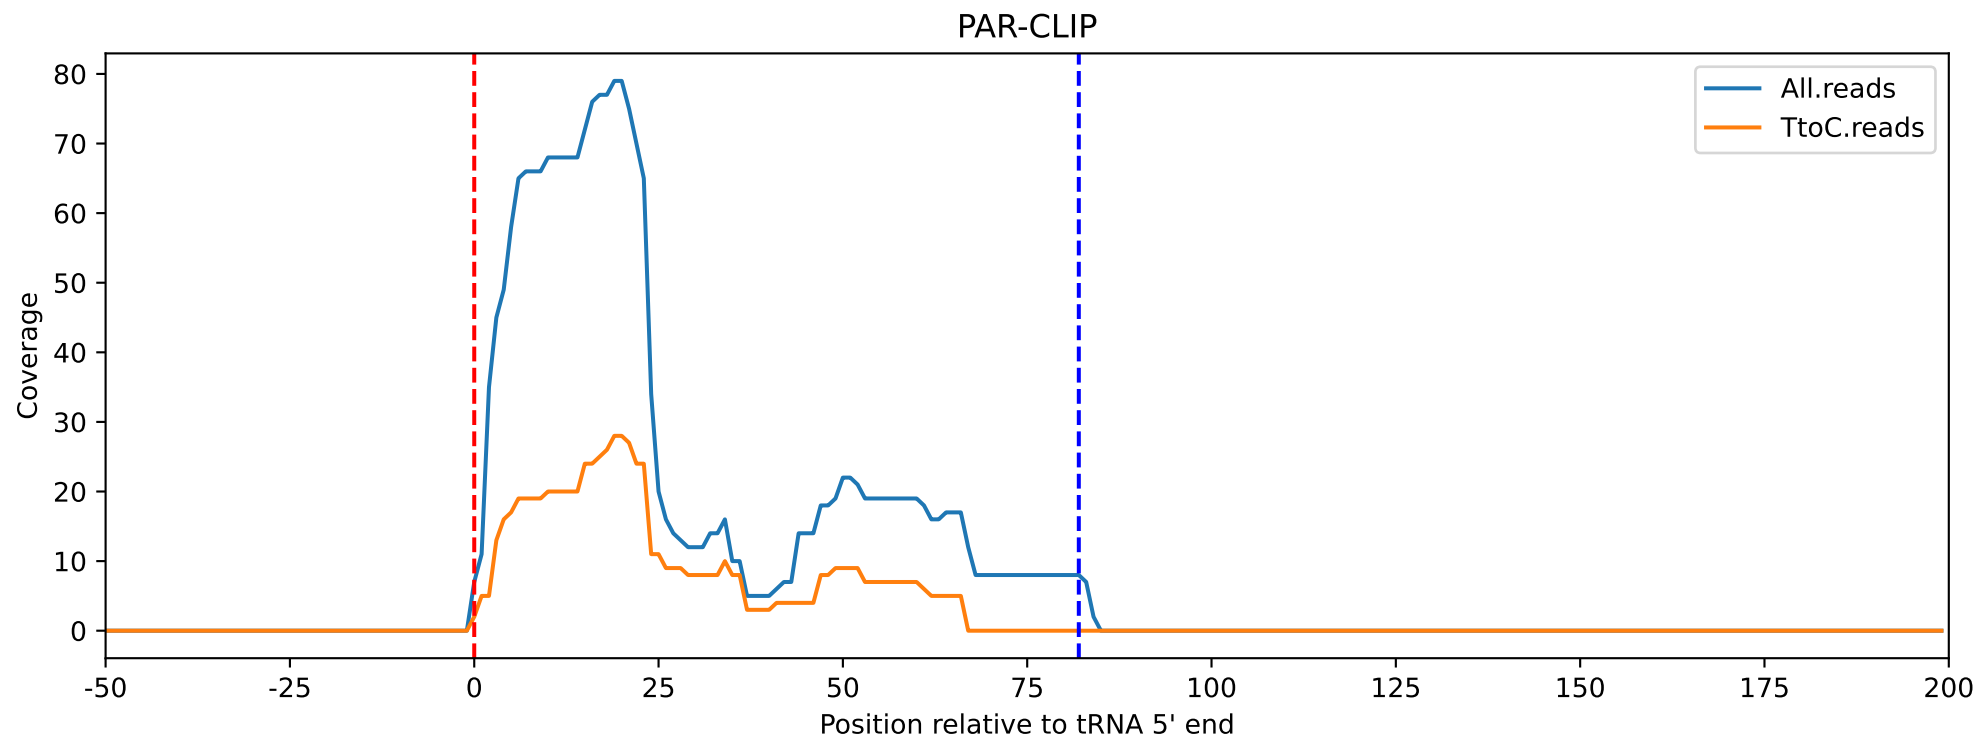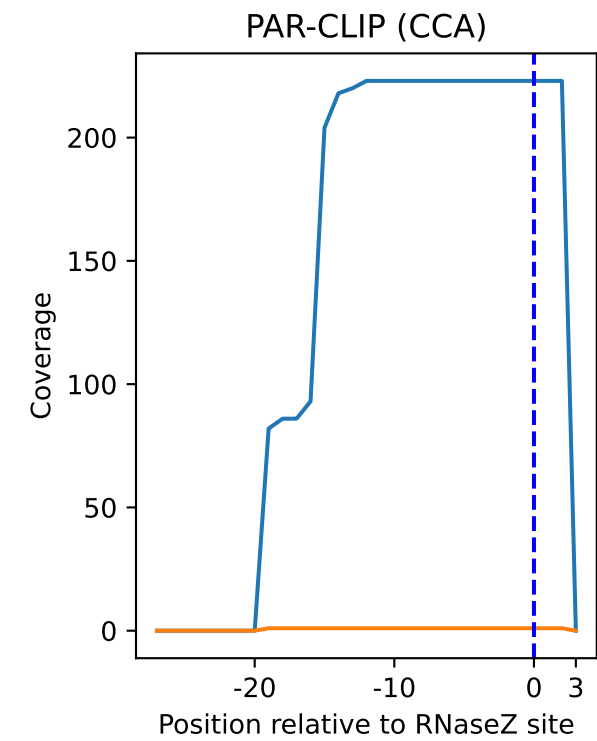

# tRNA-Leu-CAG-1-4

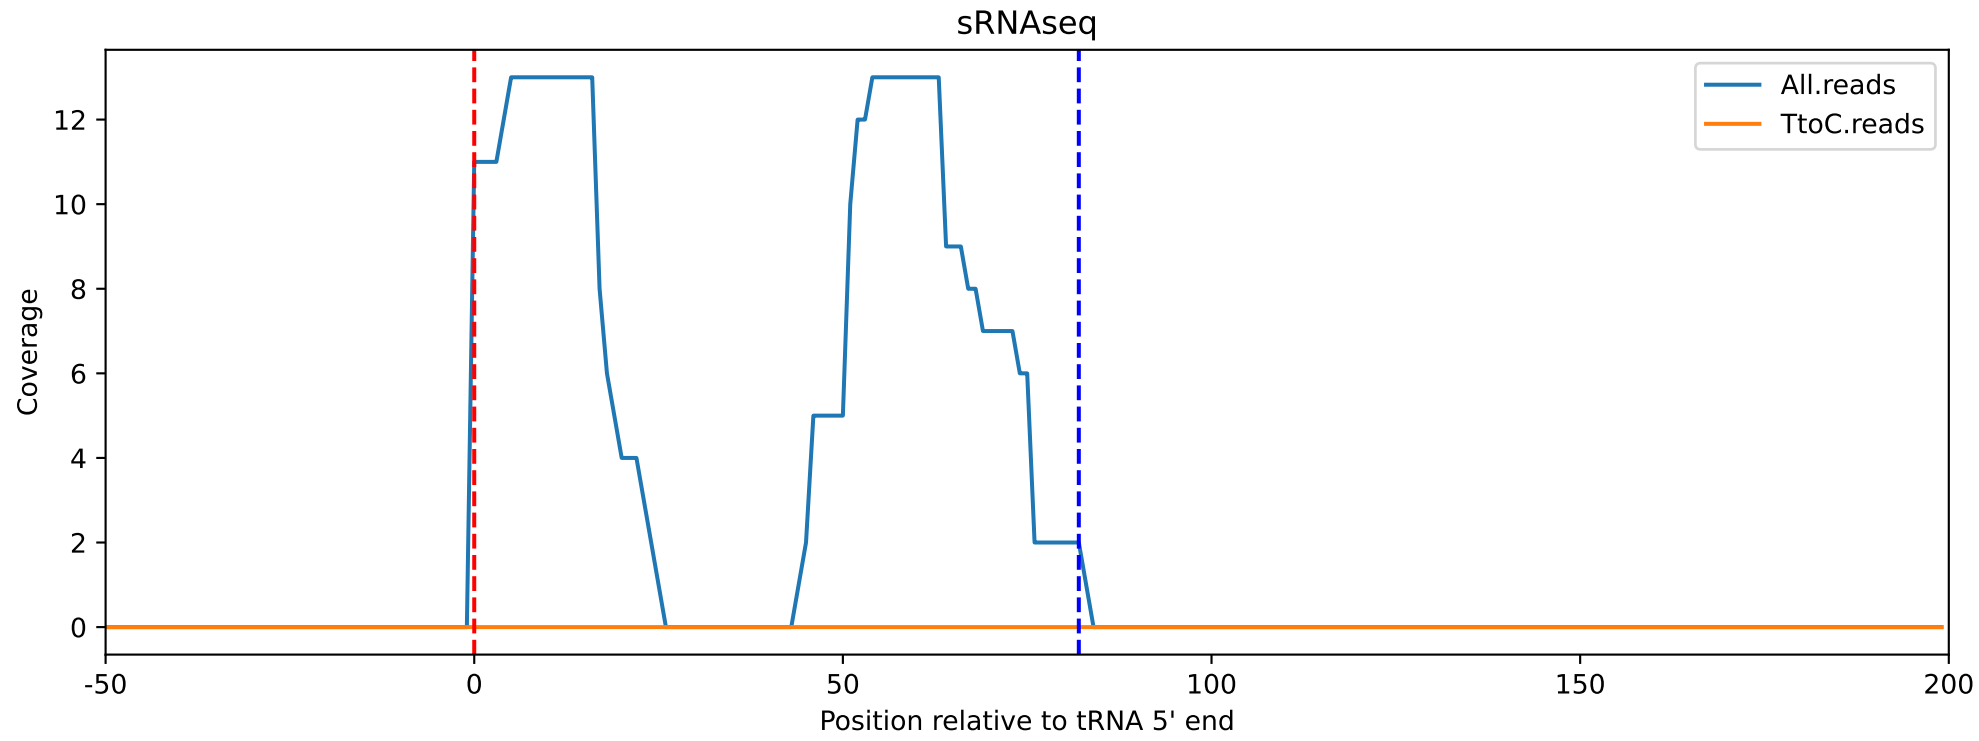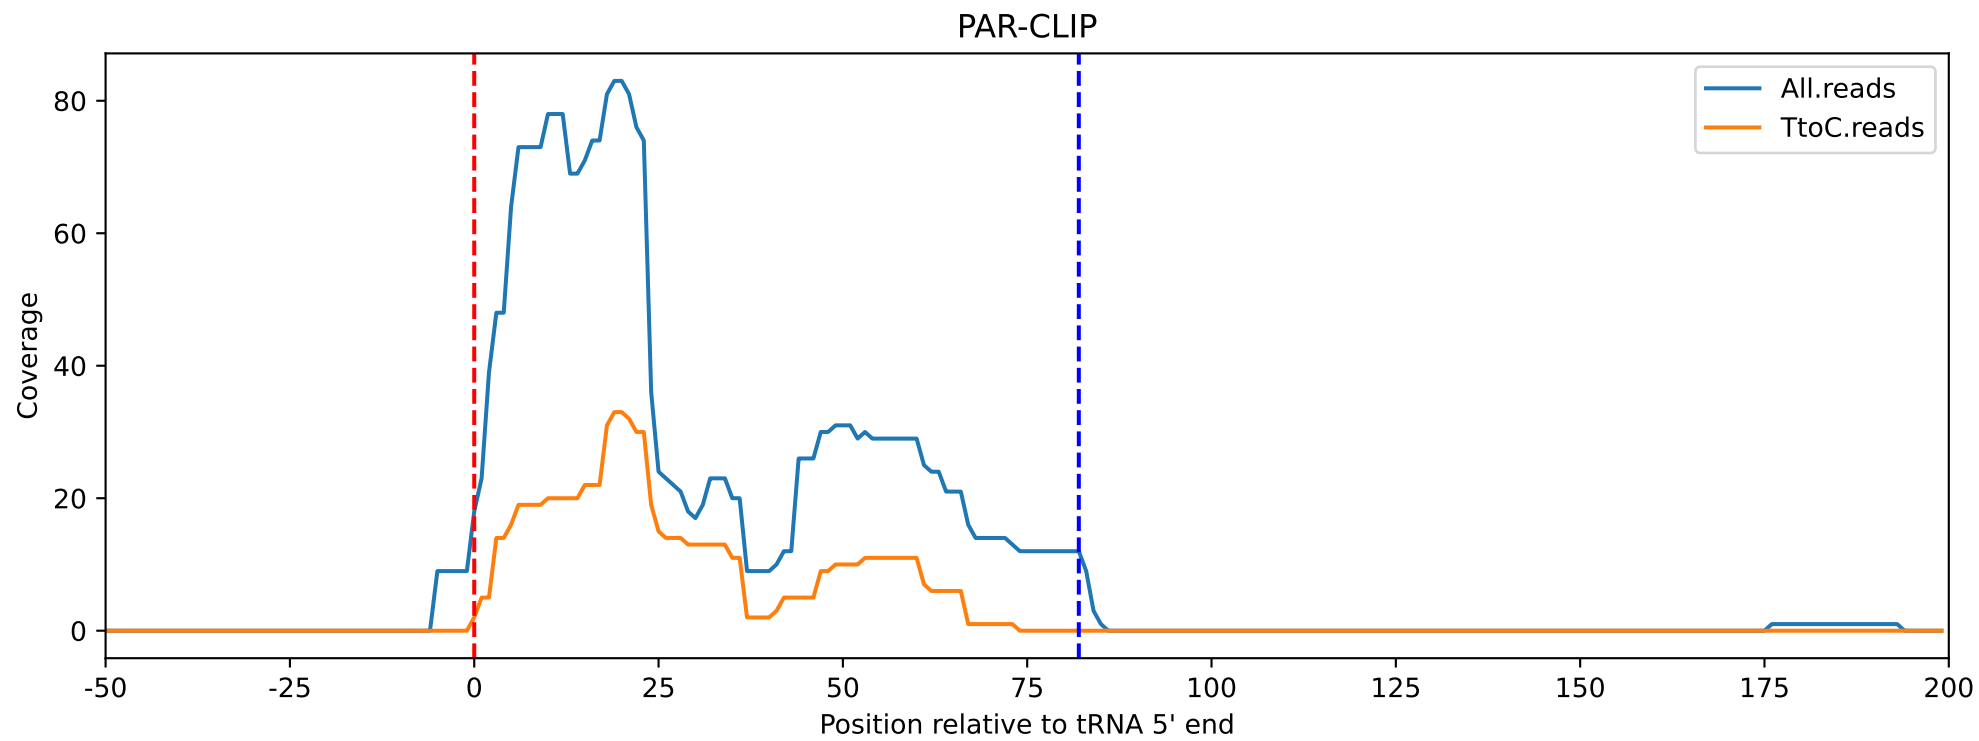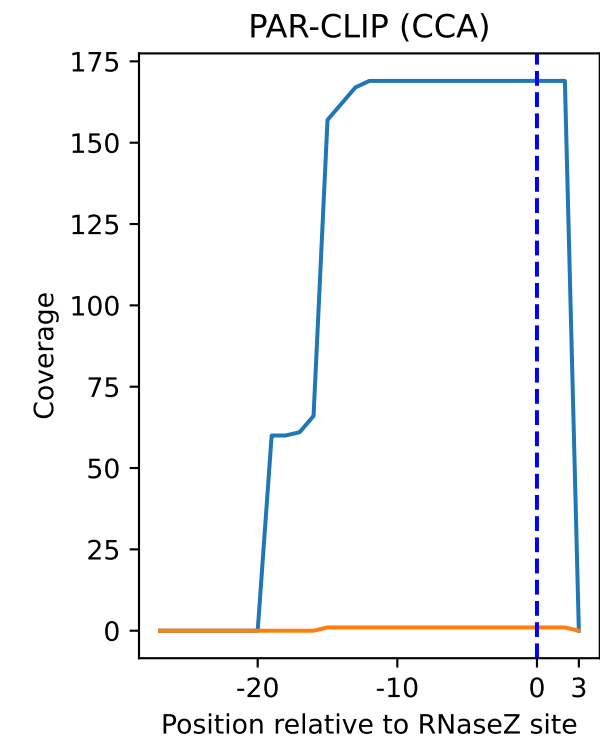

# tRNA-Leu-CAG-1-5

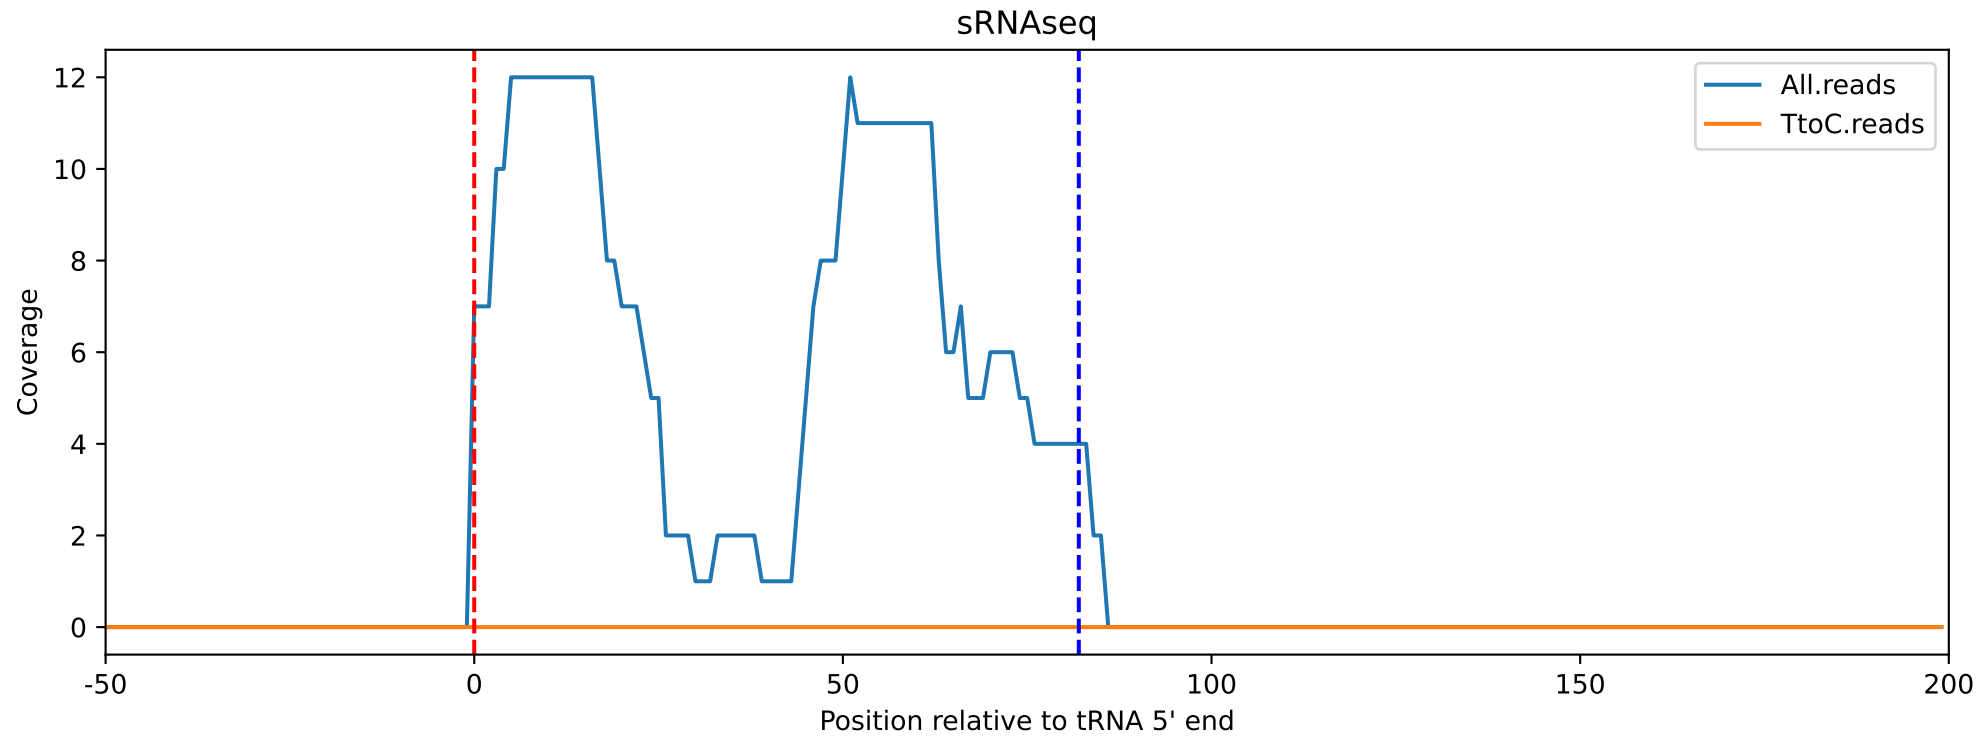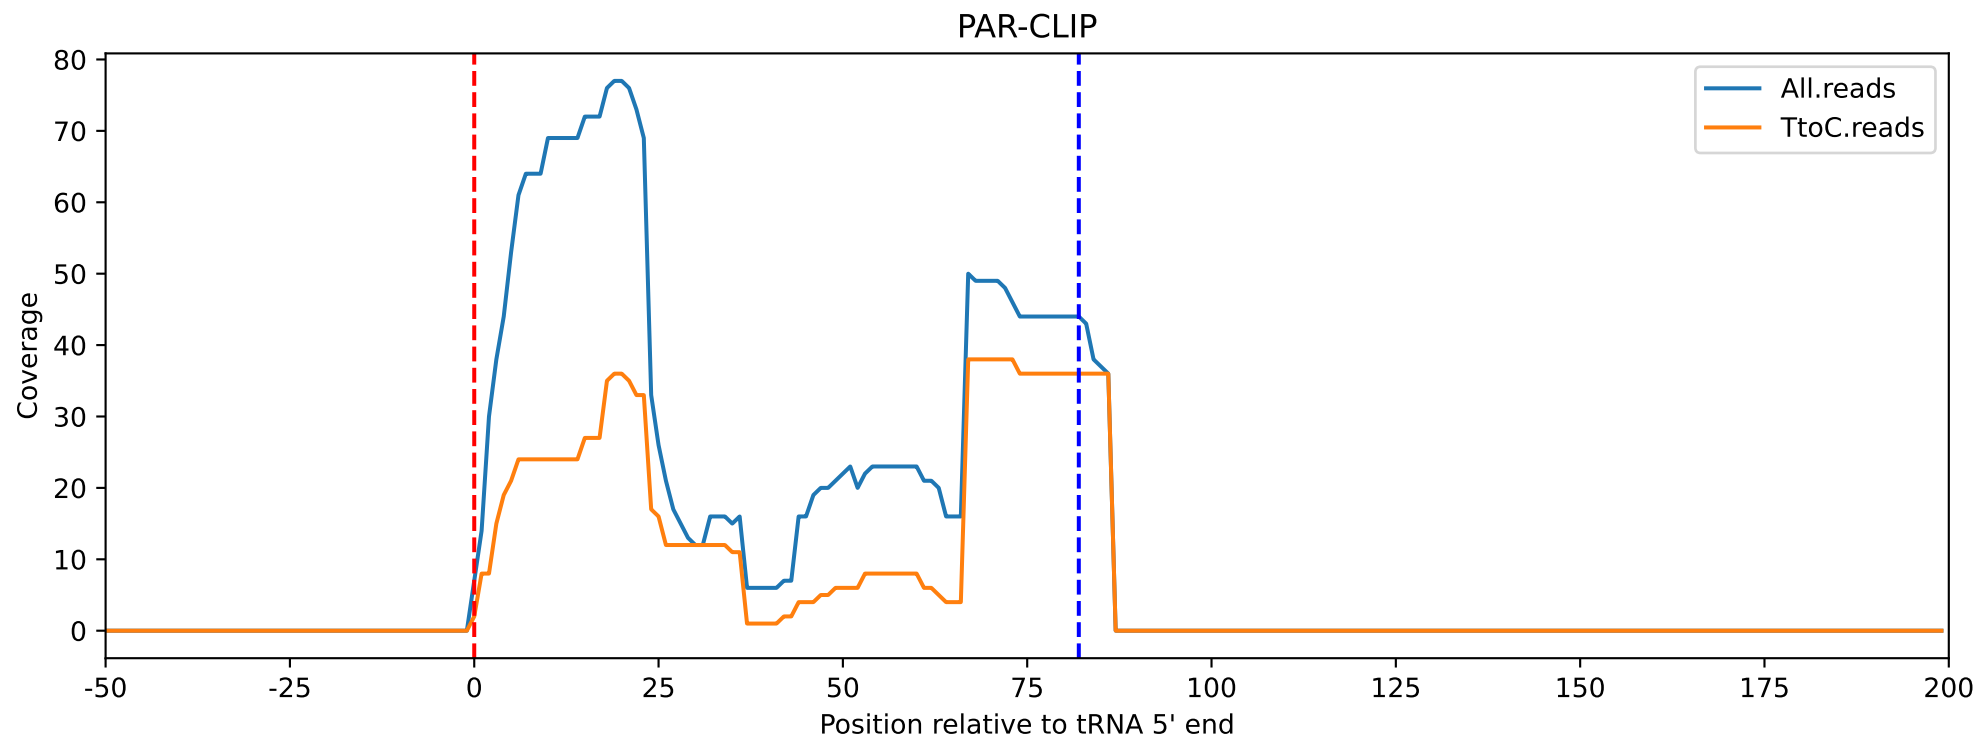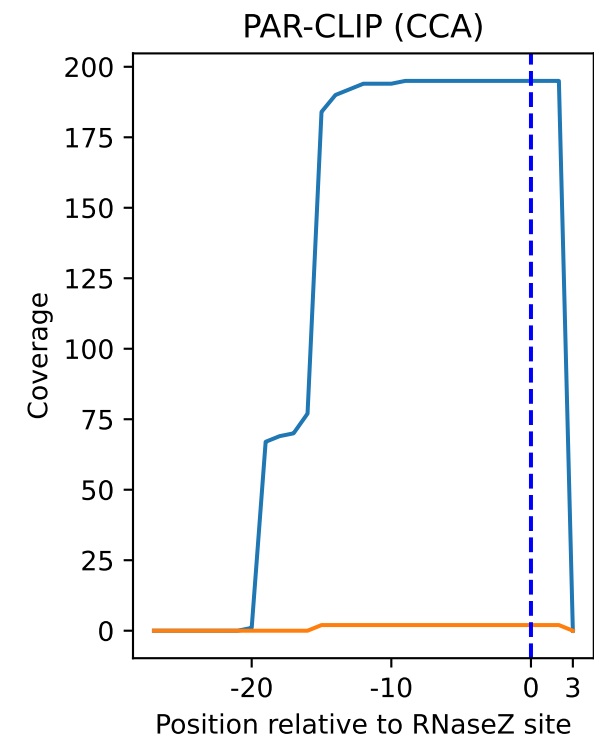

# tRNA-Leu-CAG-1-6

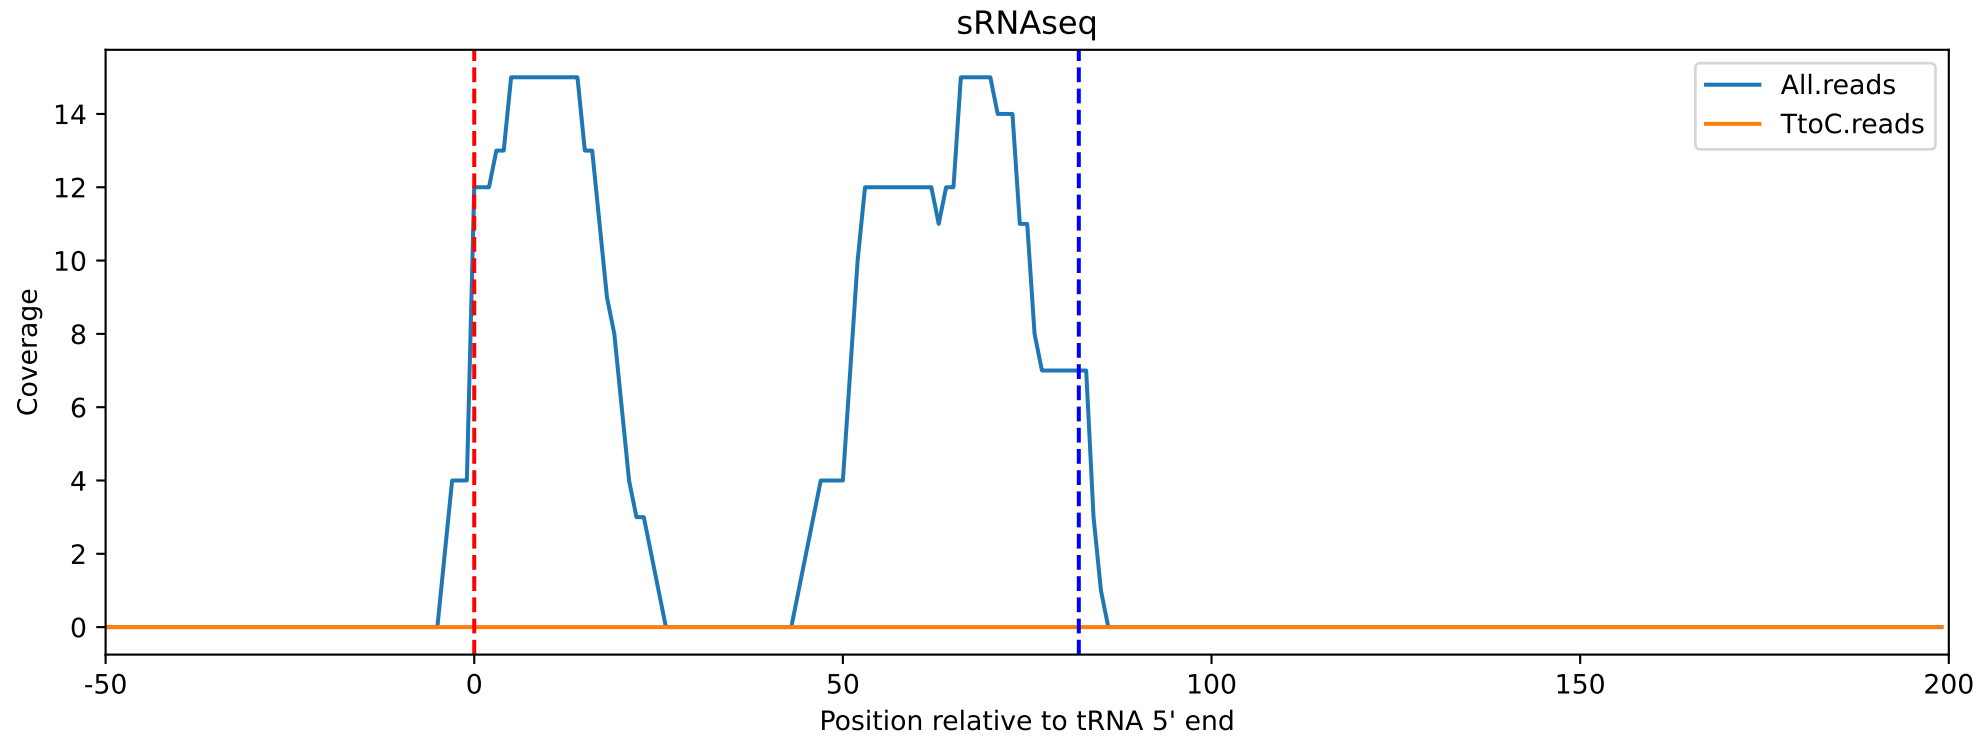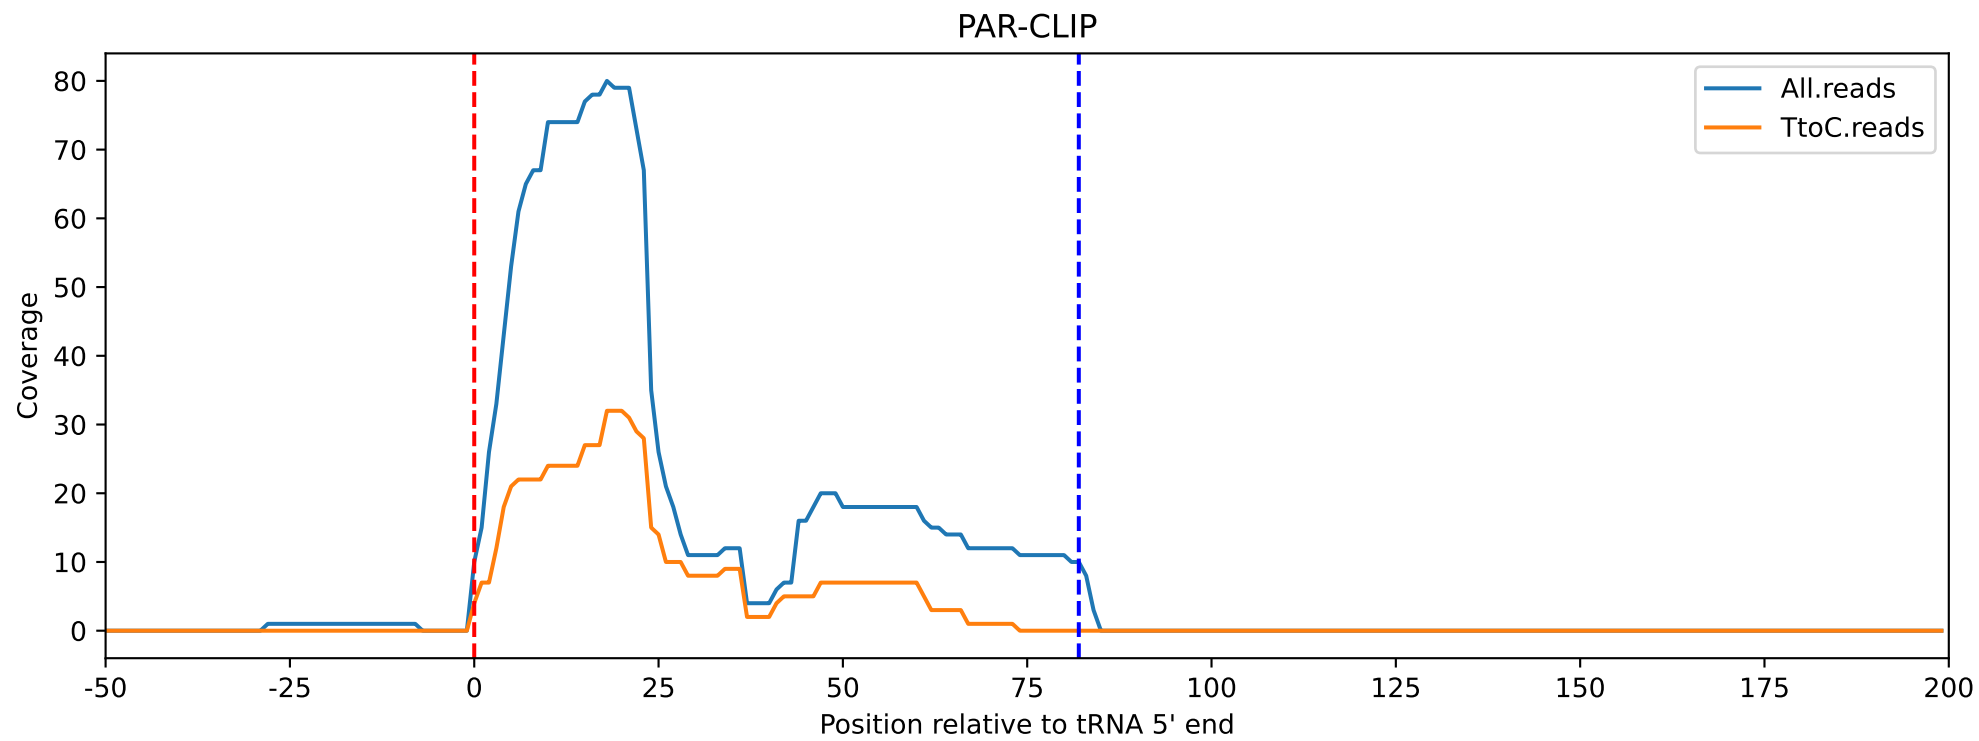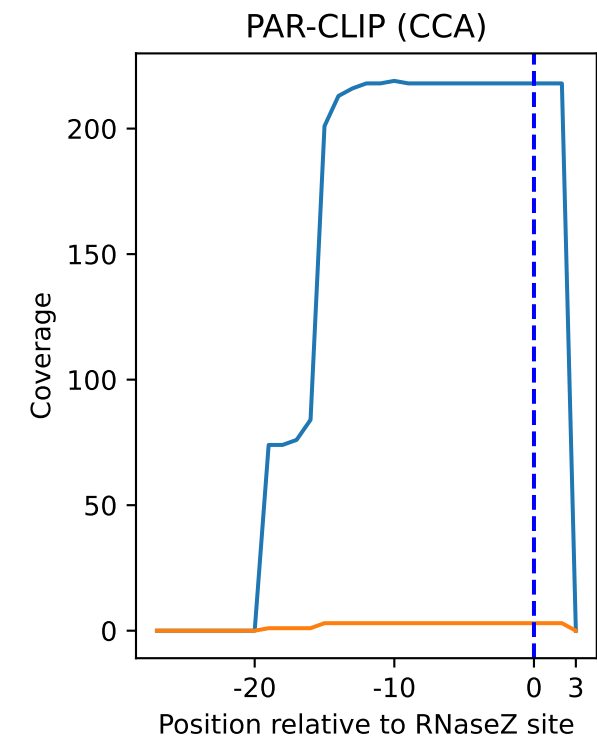

# tRNA-Thr-AGT-3-1

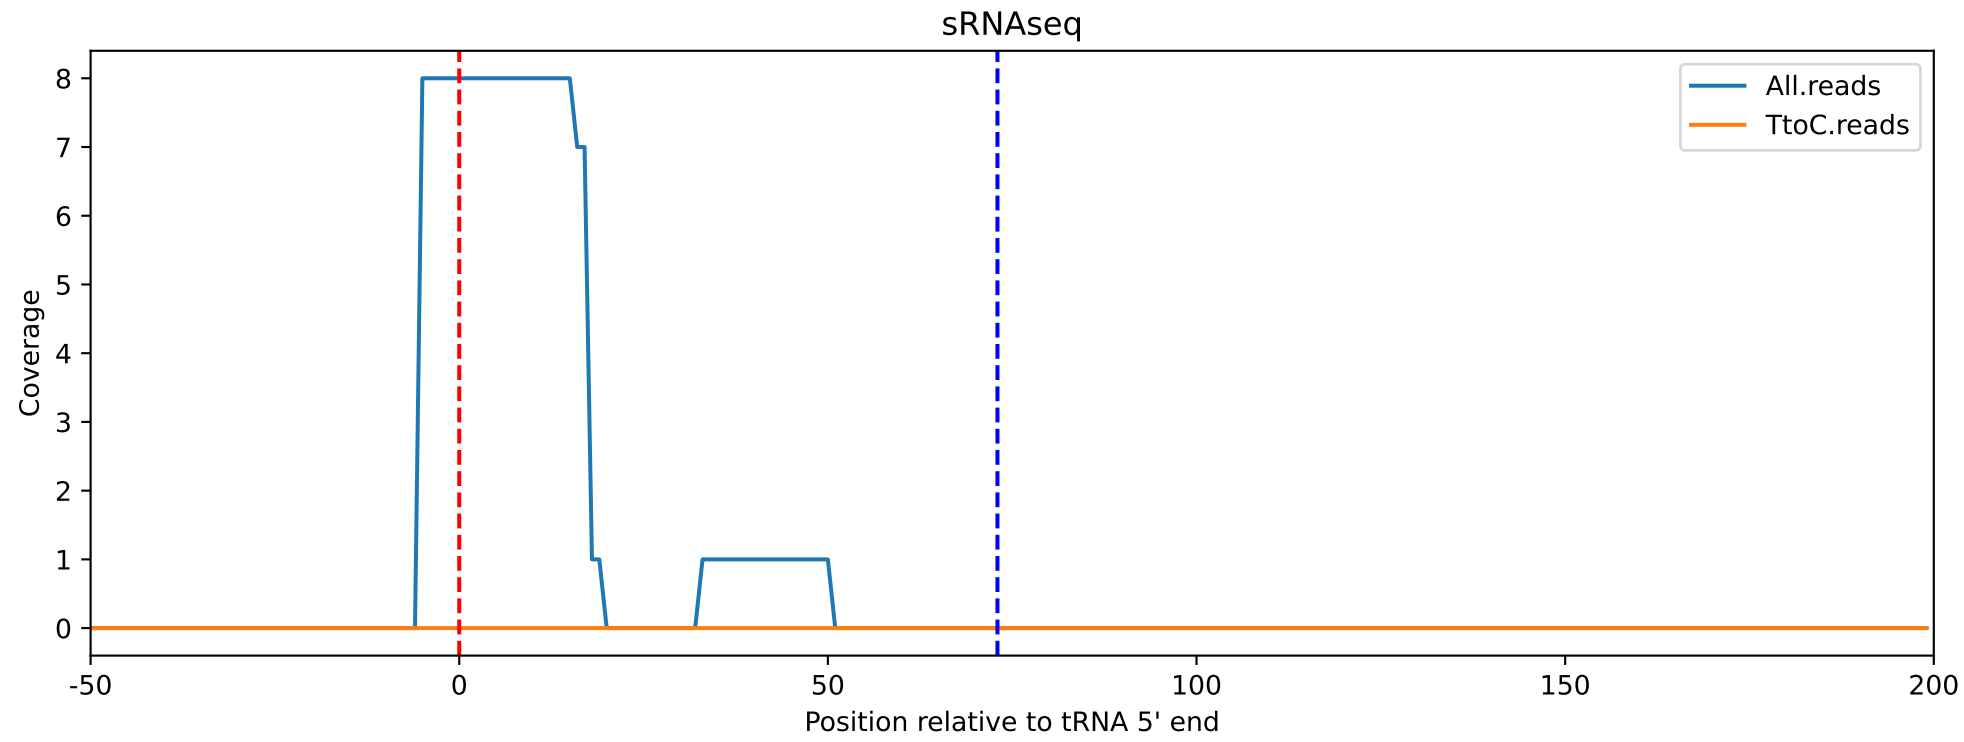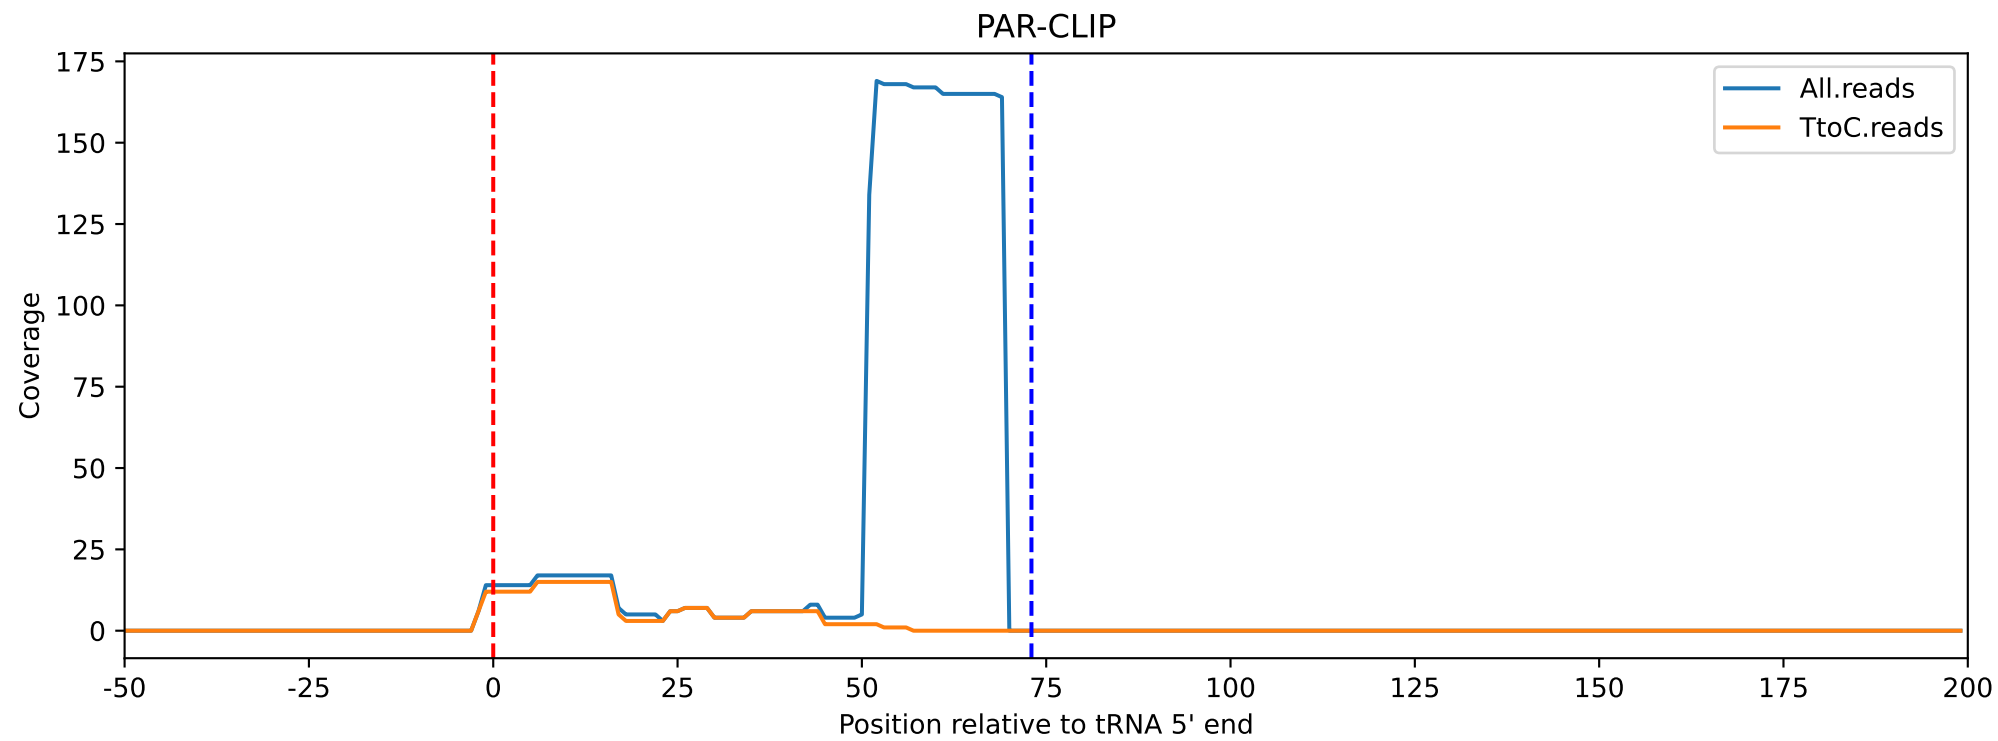

# tRNA-Val-AAC-2-4

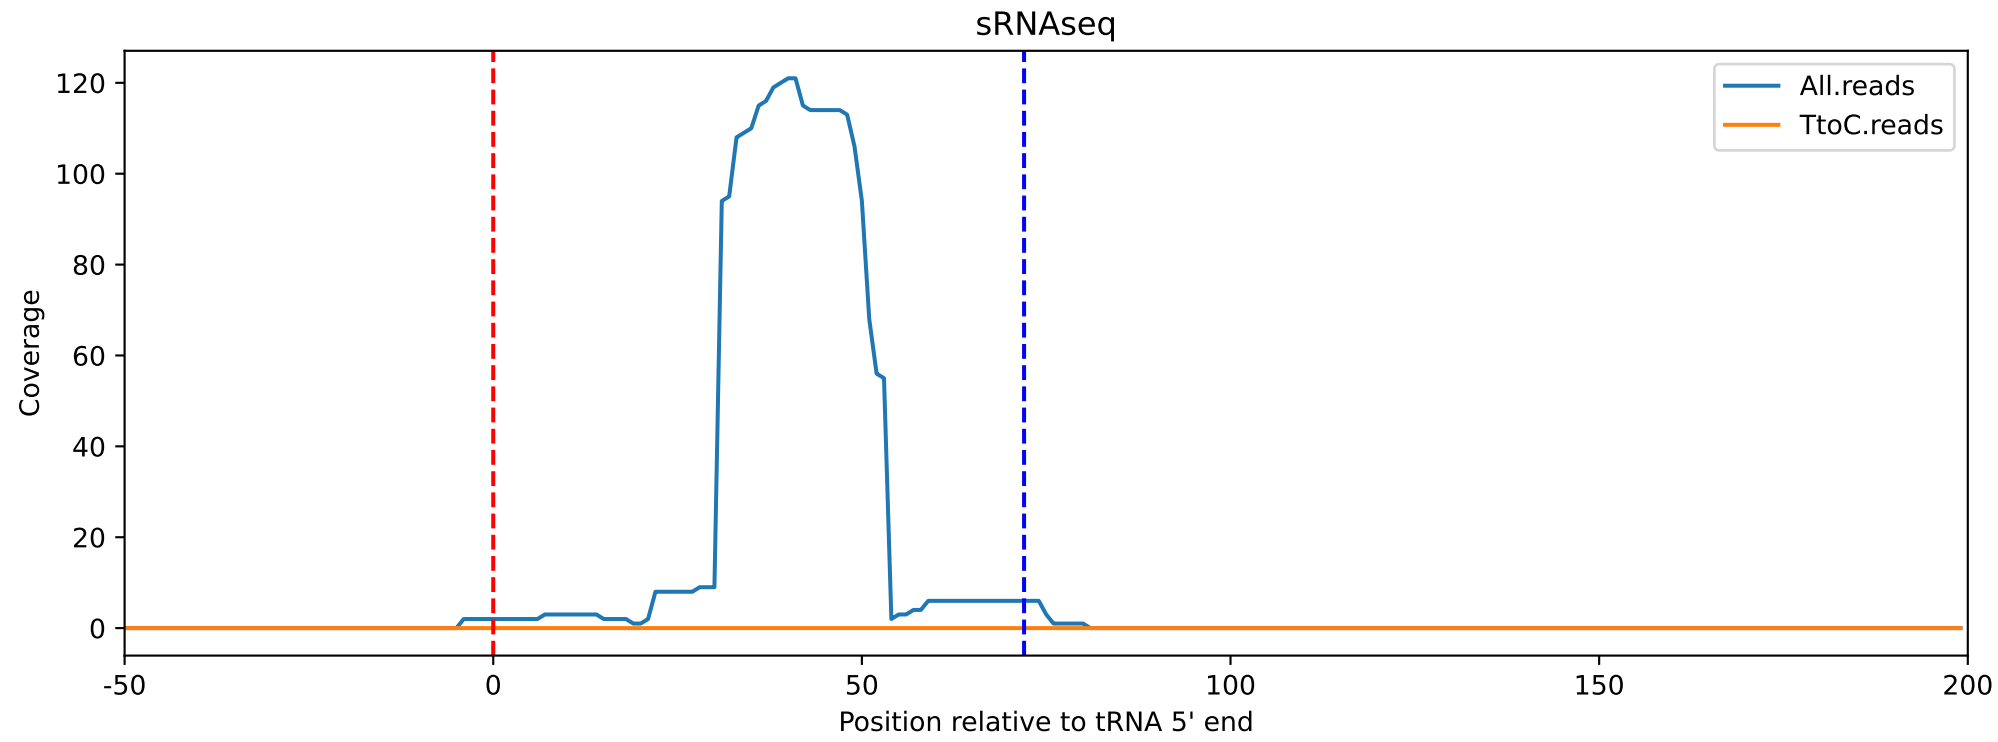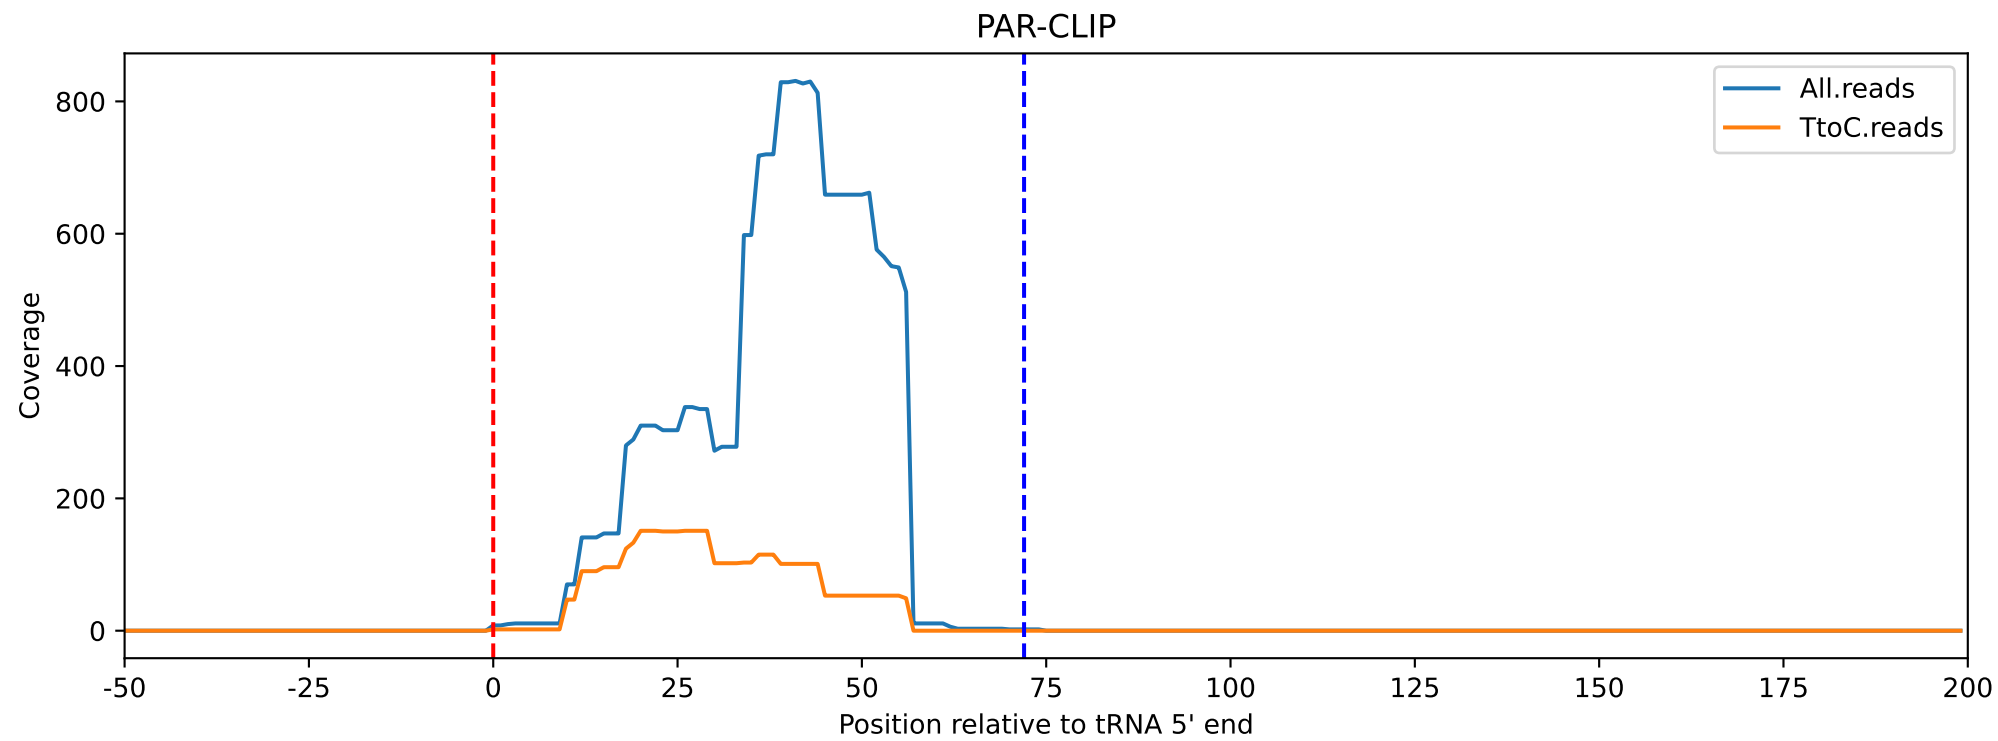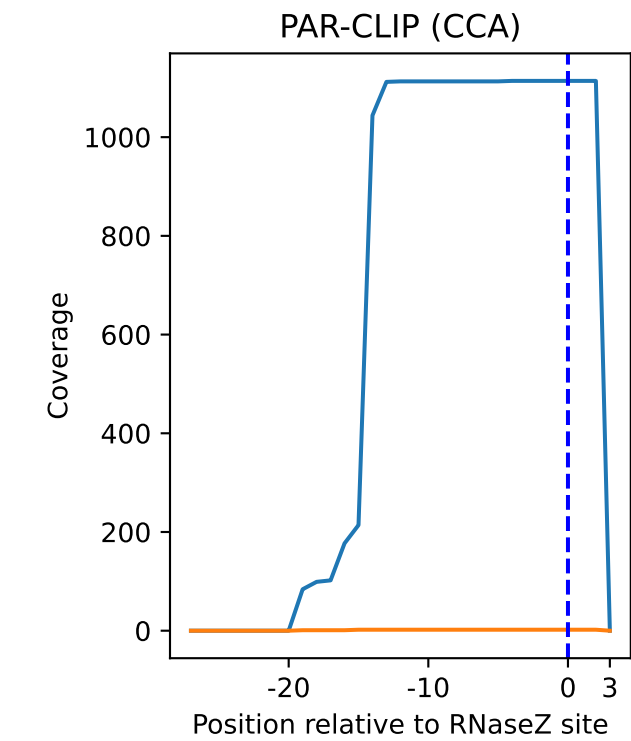

# tRNA-iMet-CAT-1-5

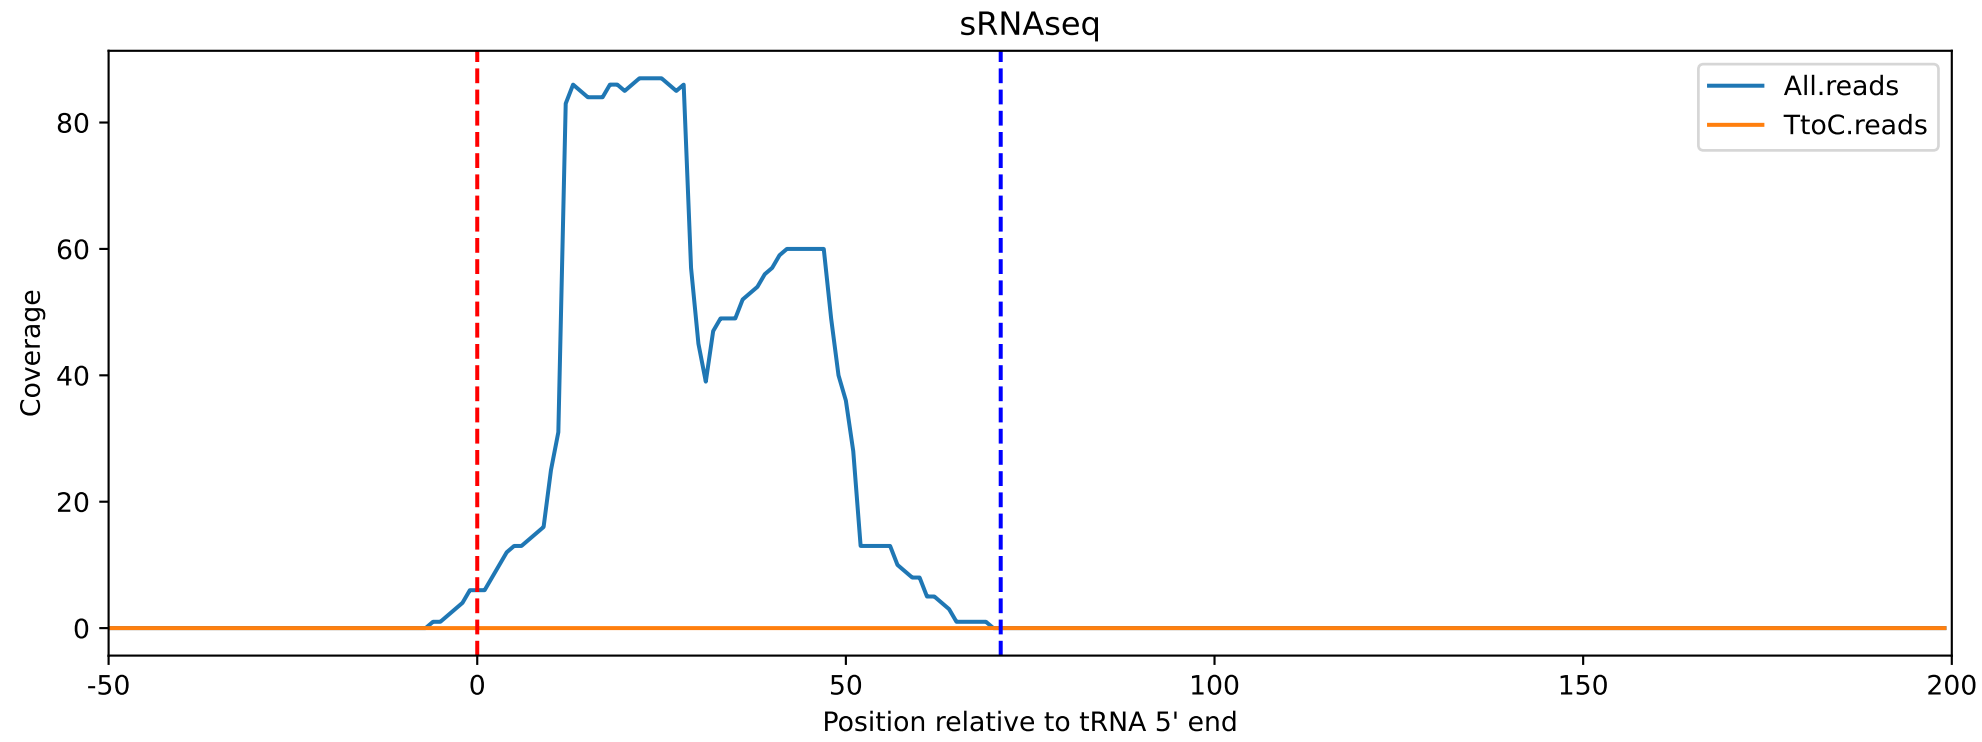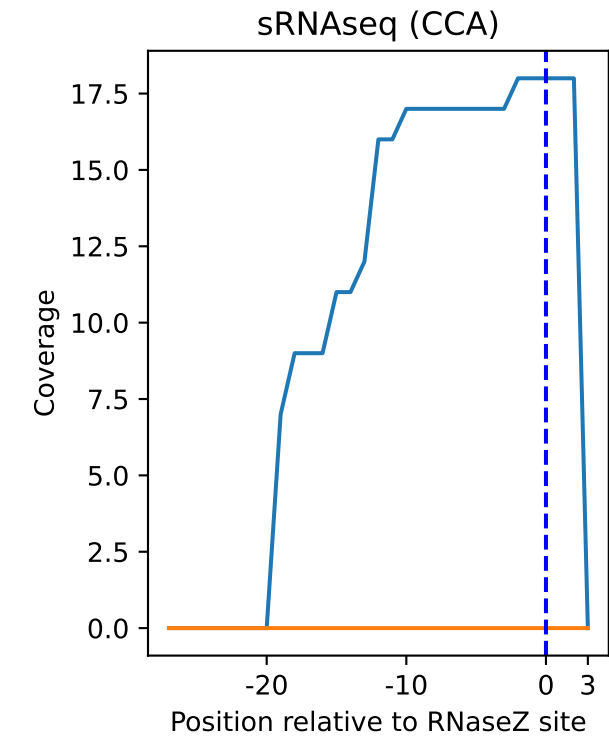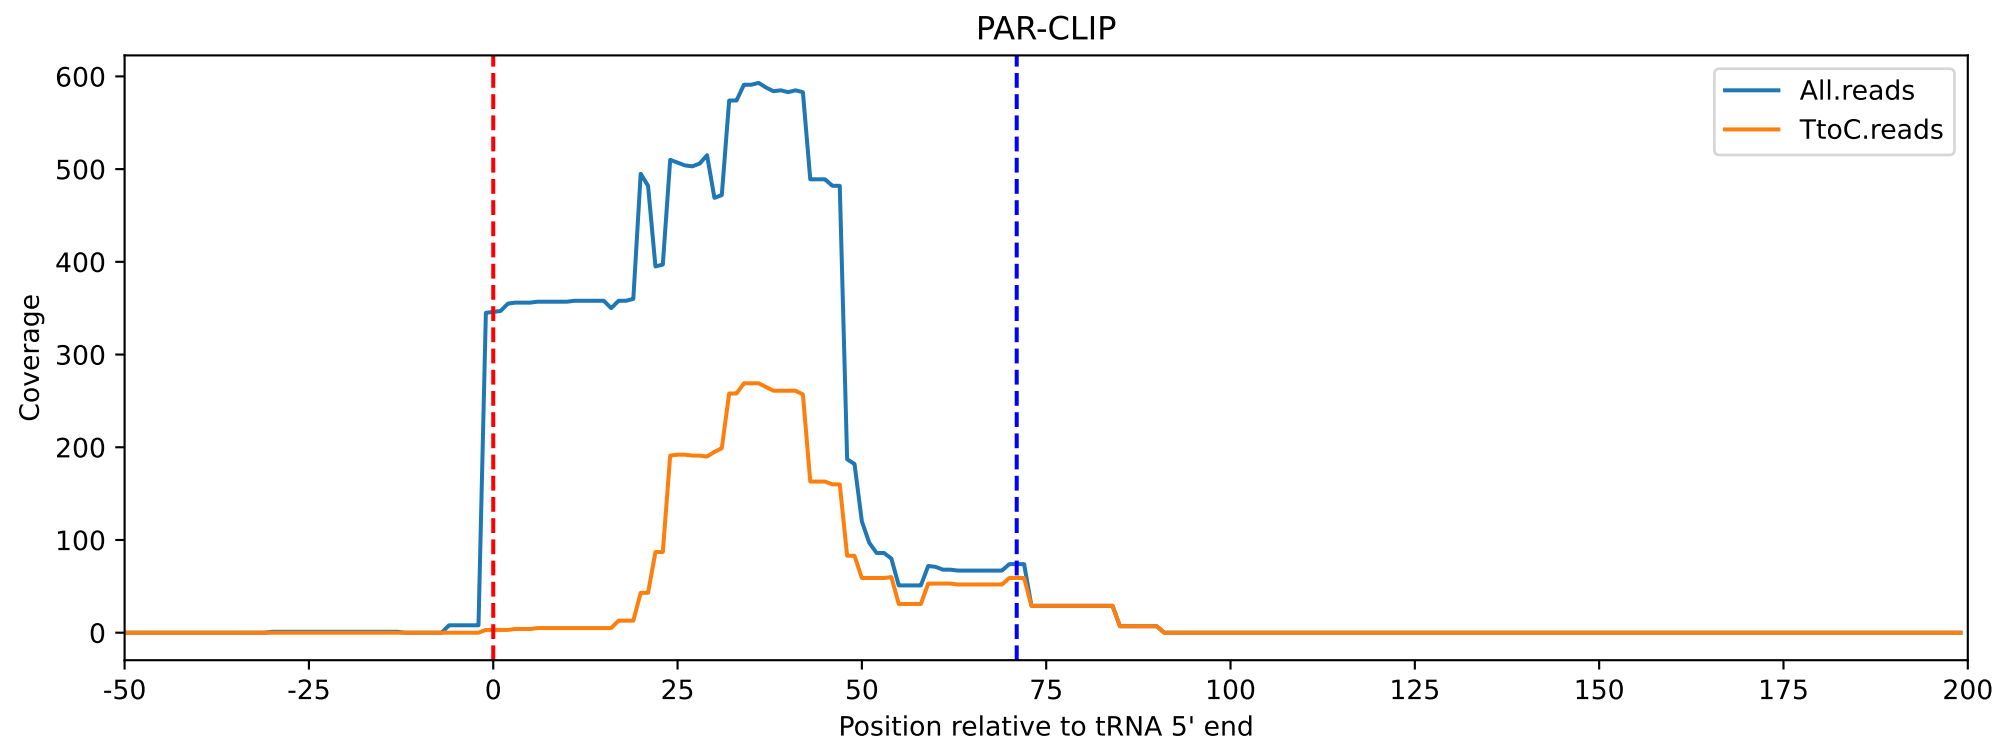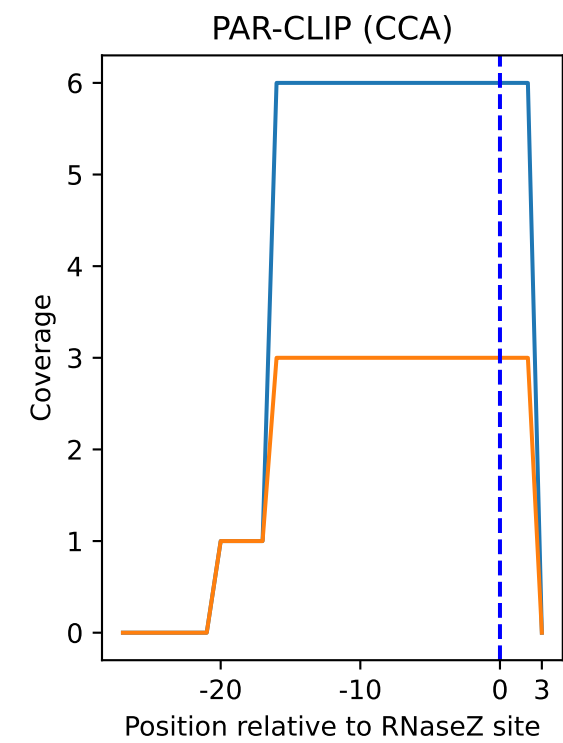

# tRNA-Pro-CGG-2-3

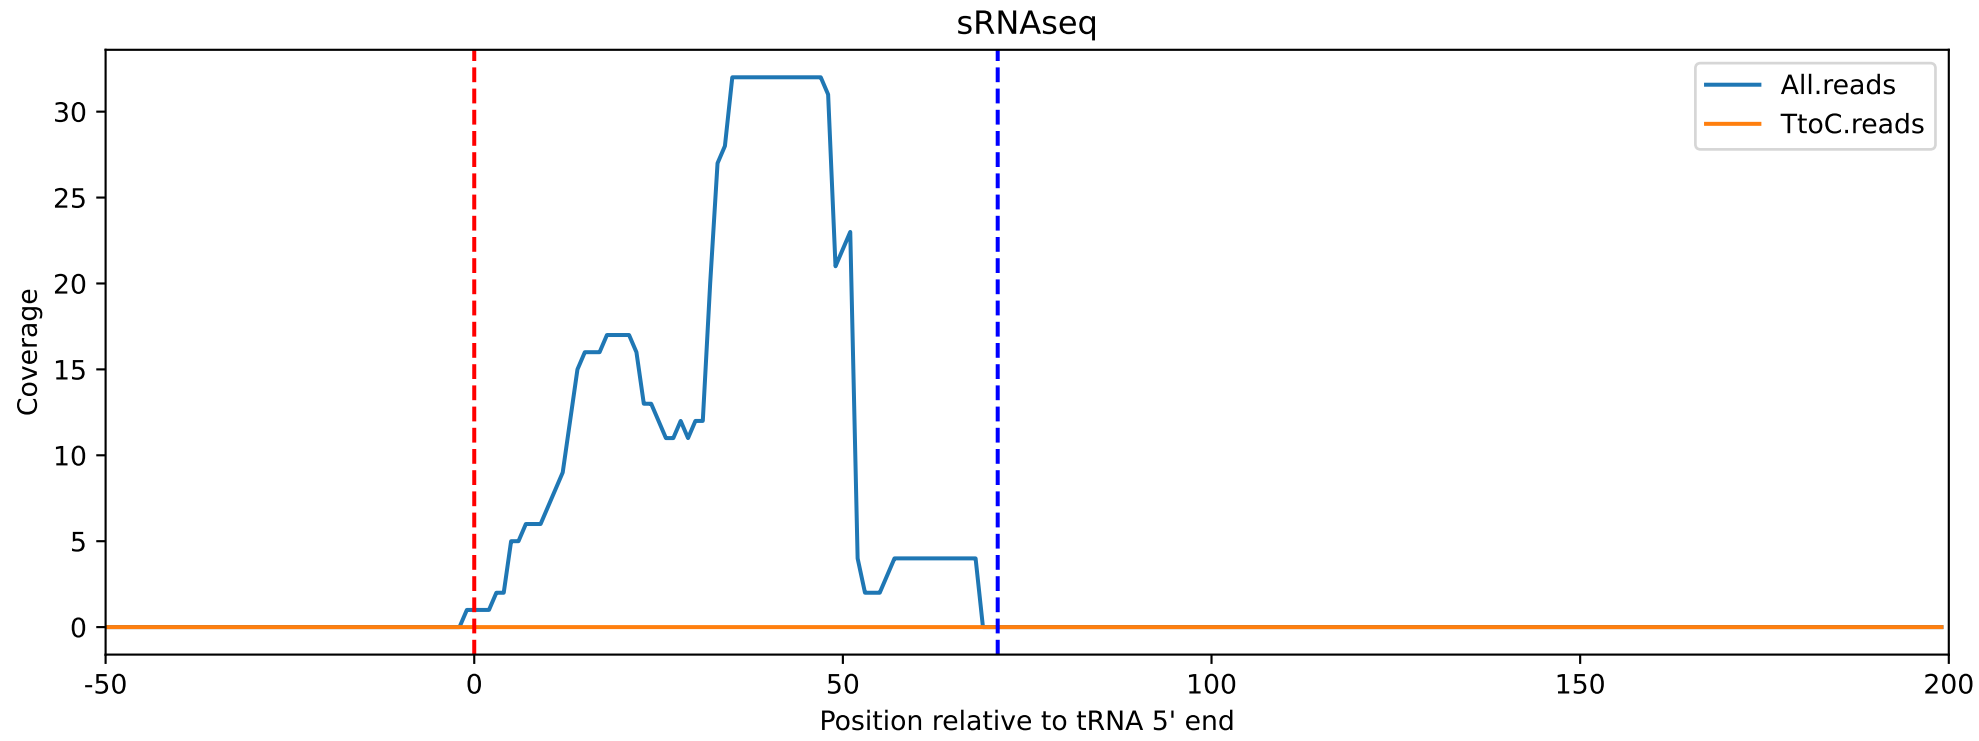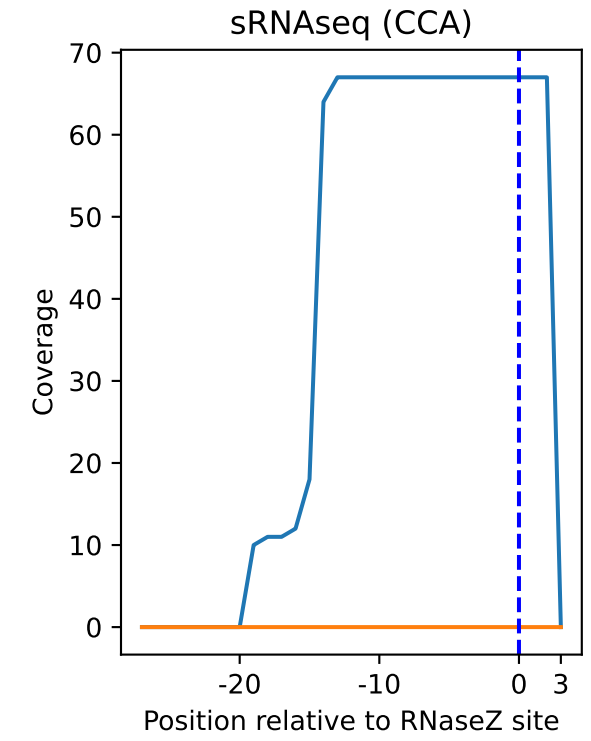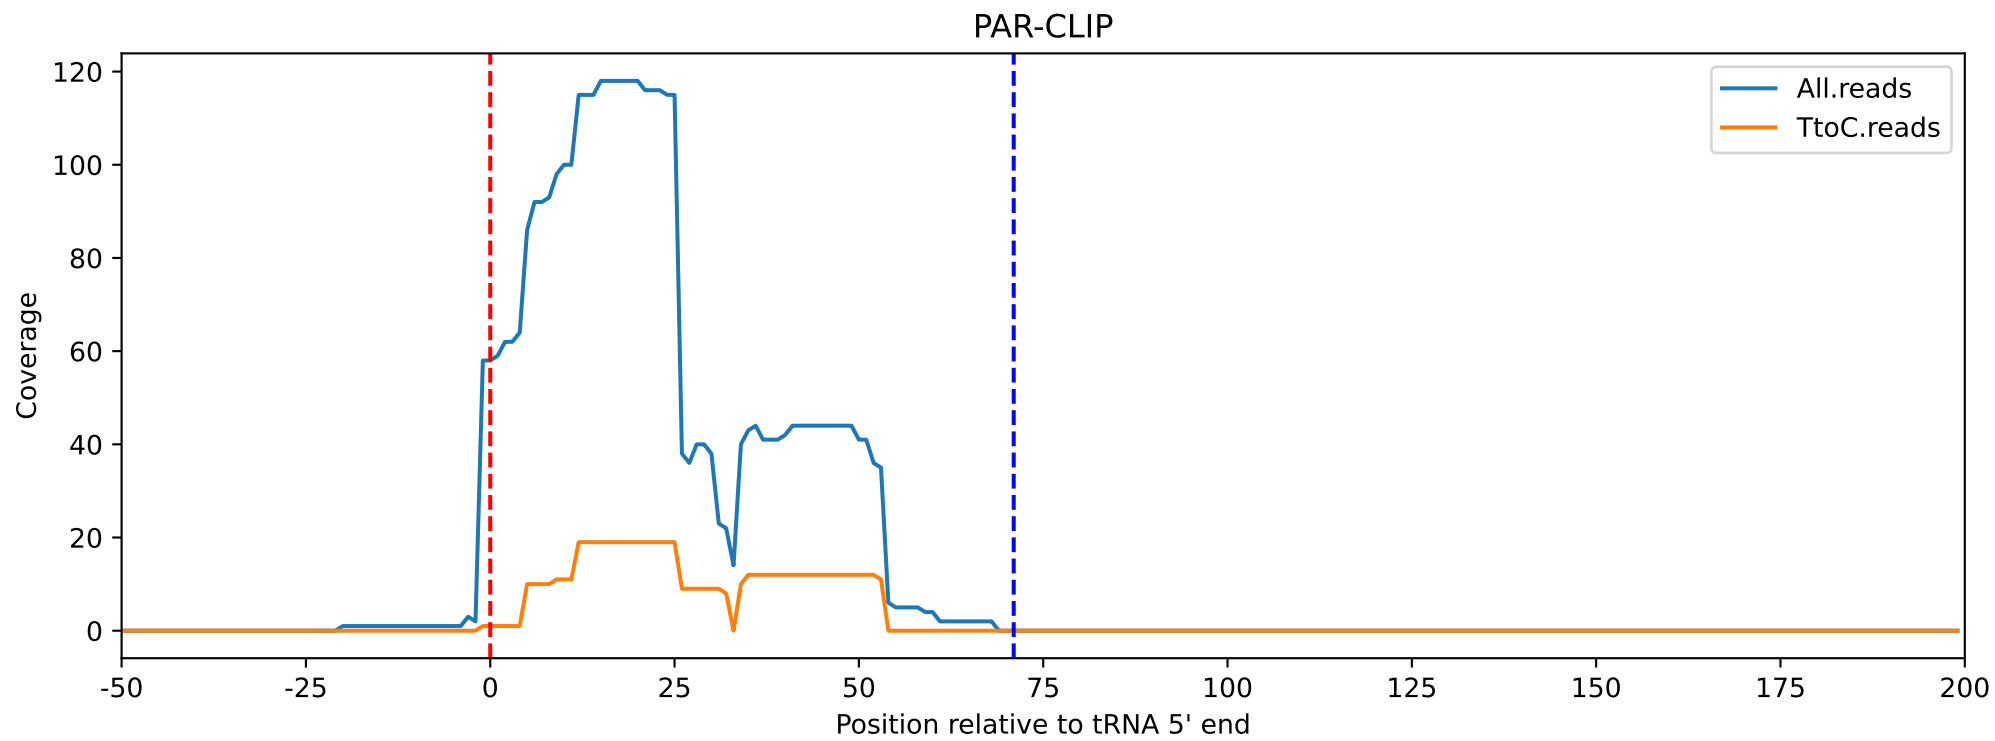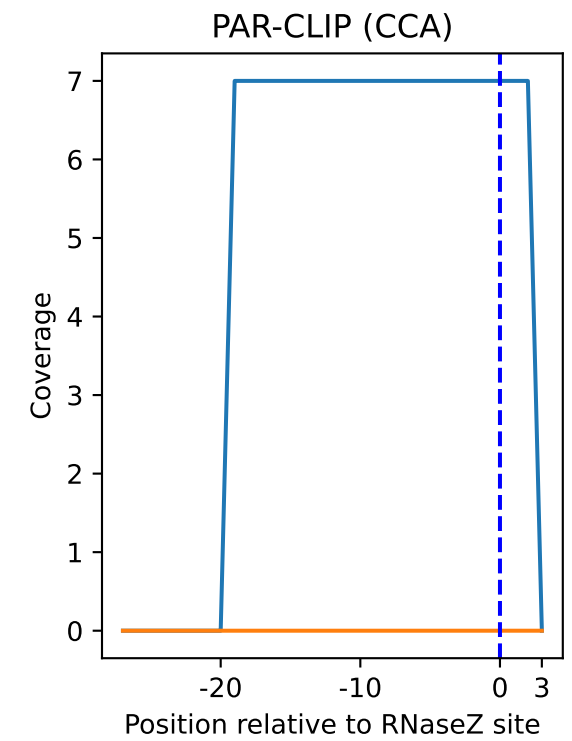



# tRNA-Arg-TCG-4-1

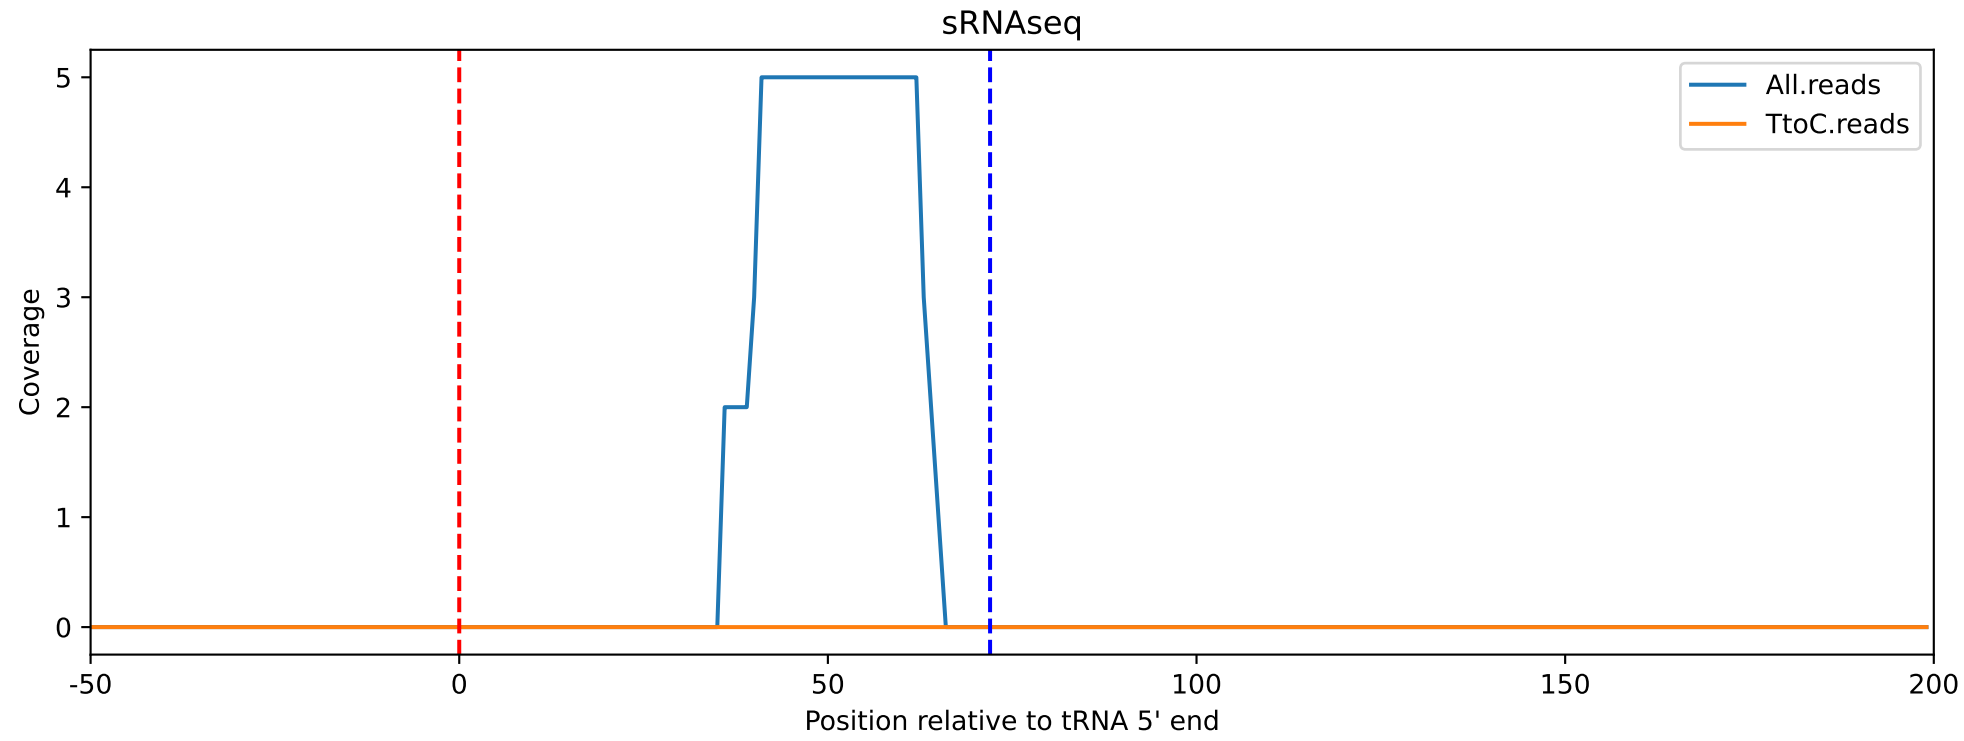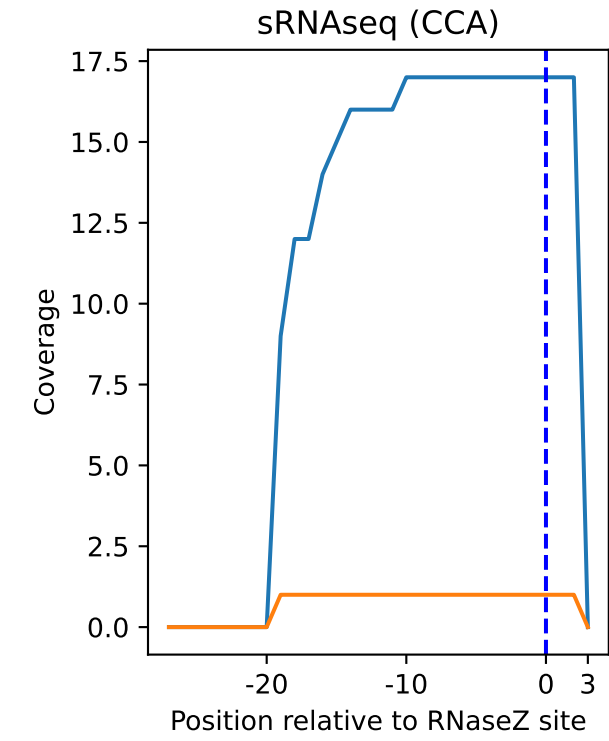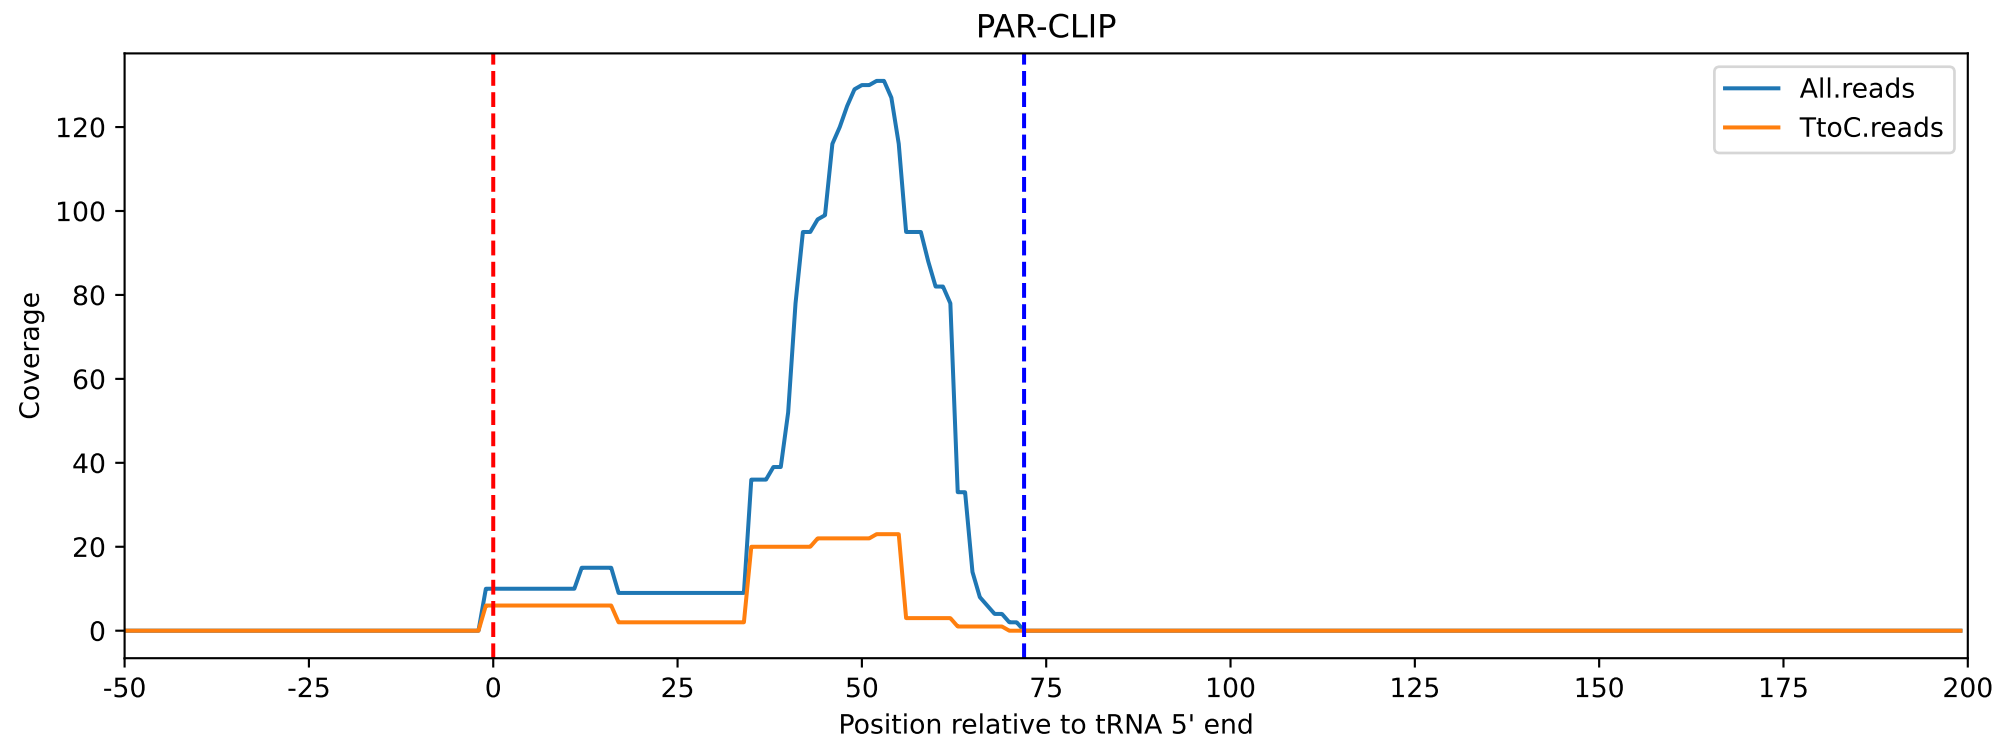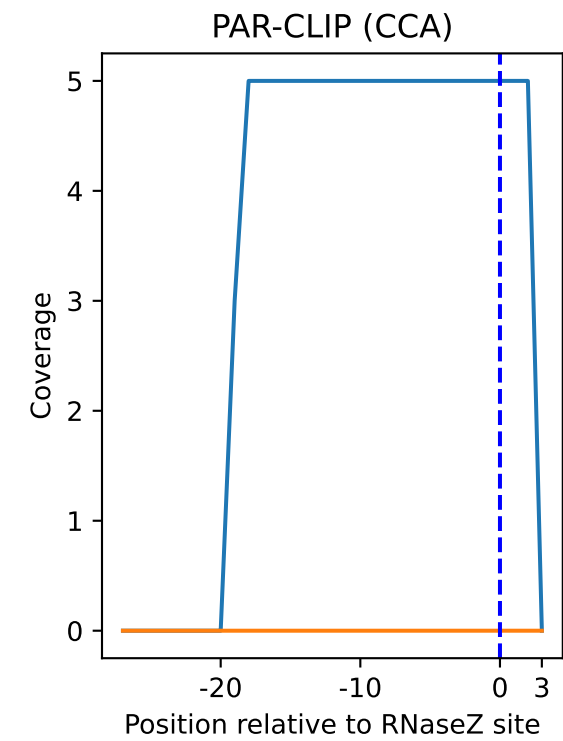

# tRNA-Lys-TTT-2-1

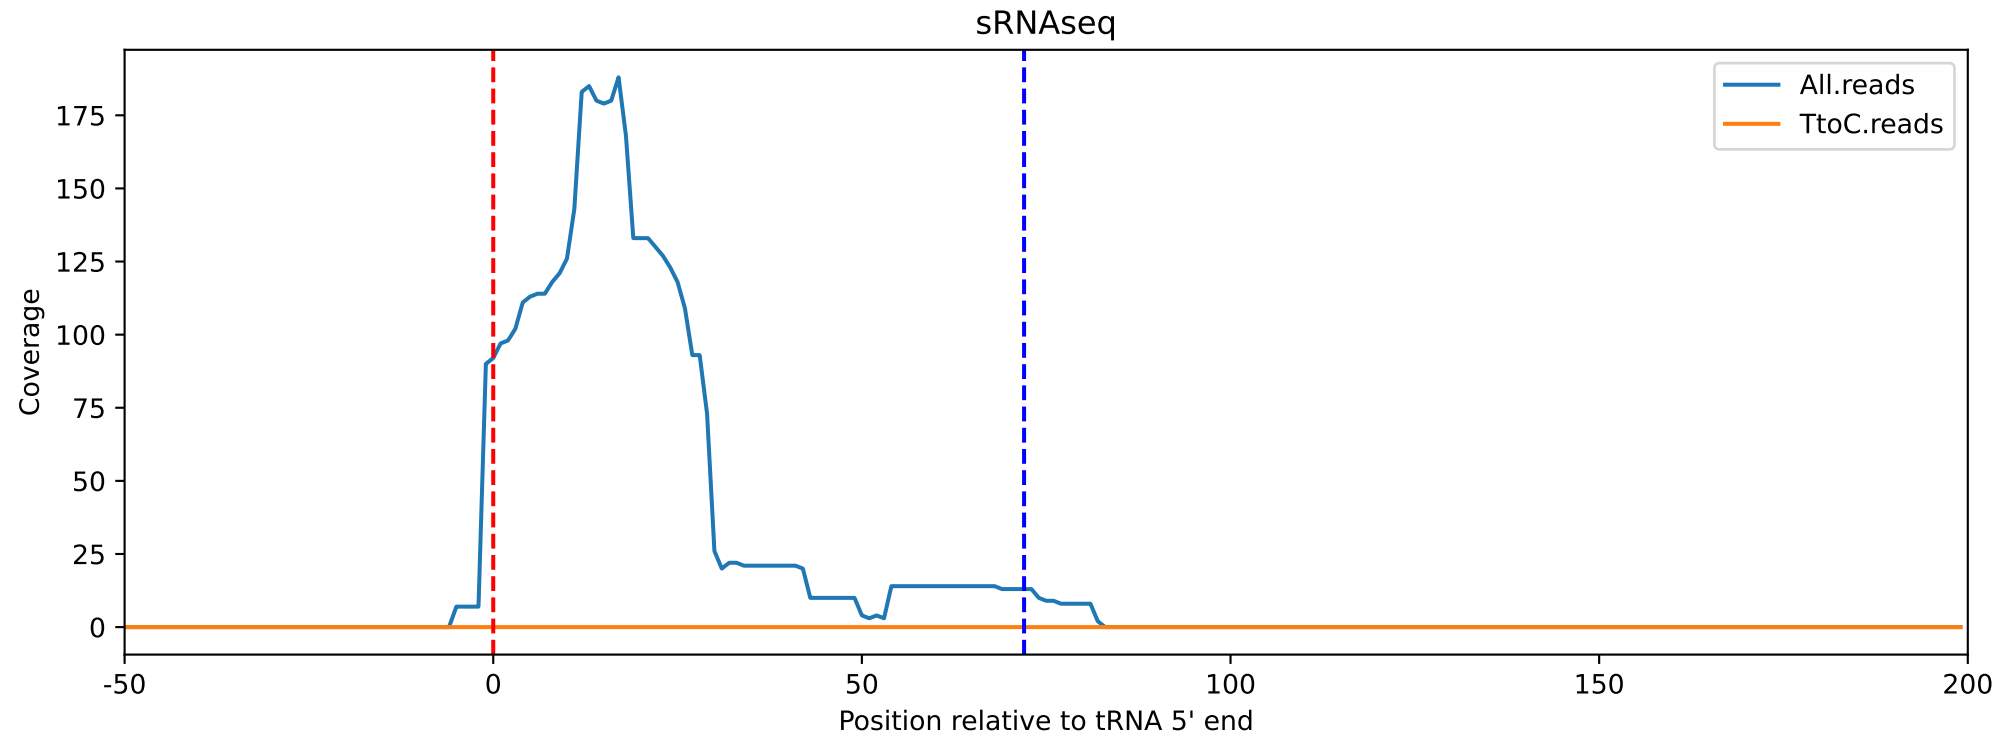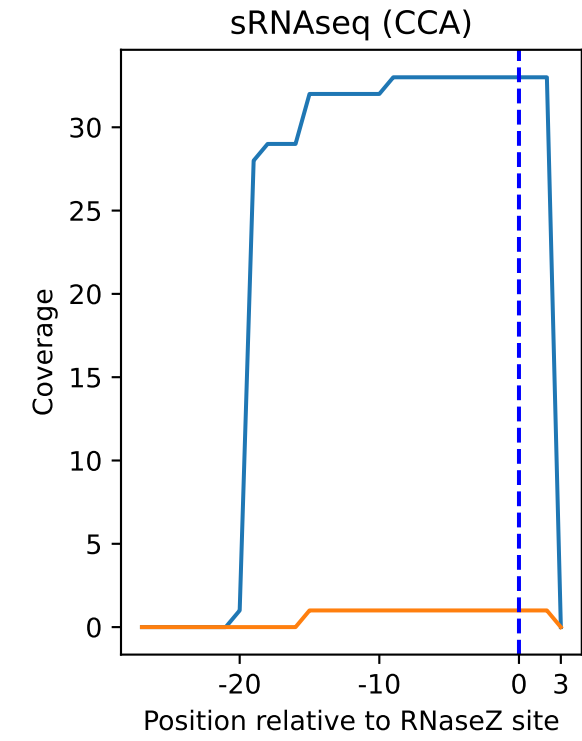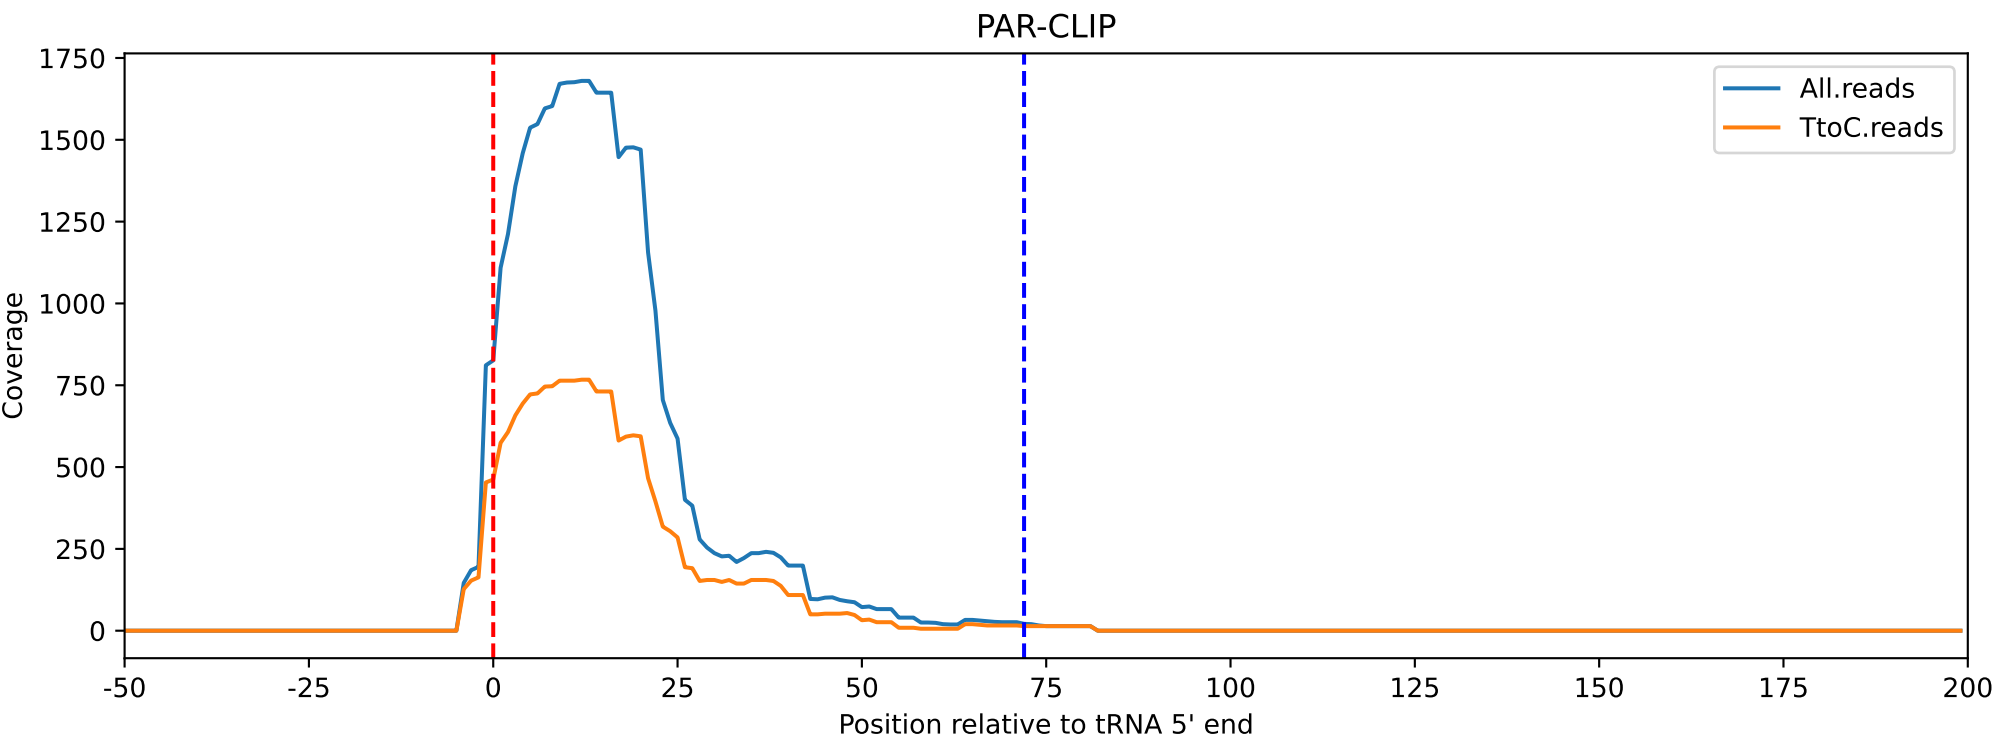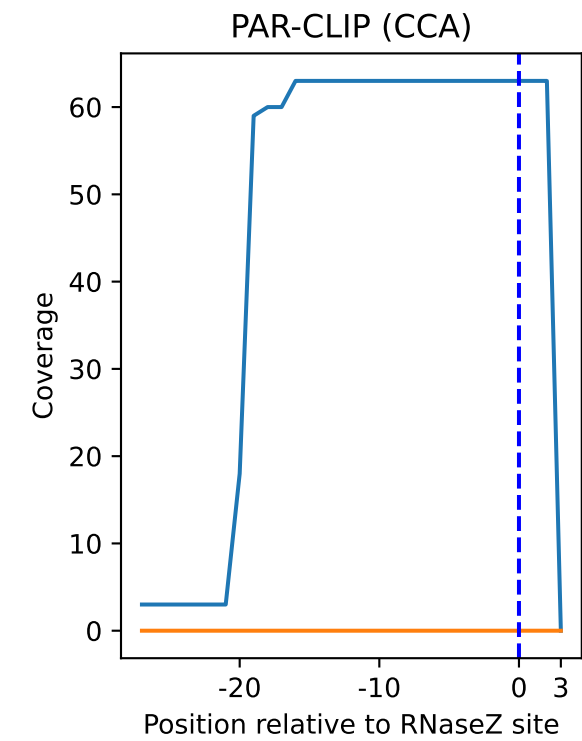

# tRNA-Gly-TCC-1-1

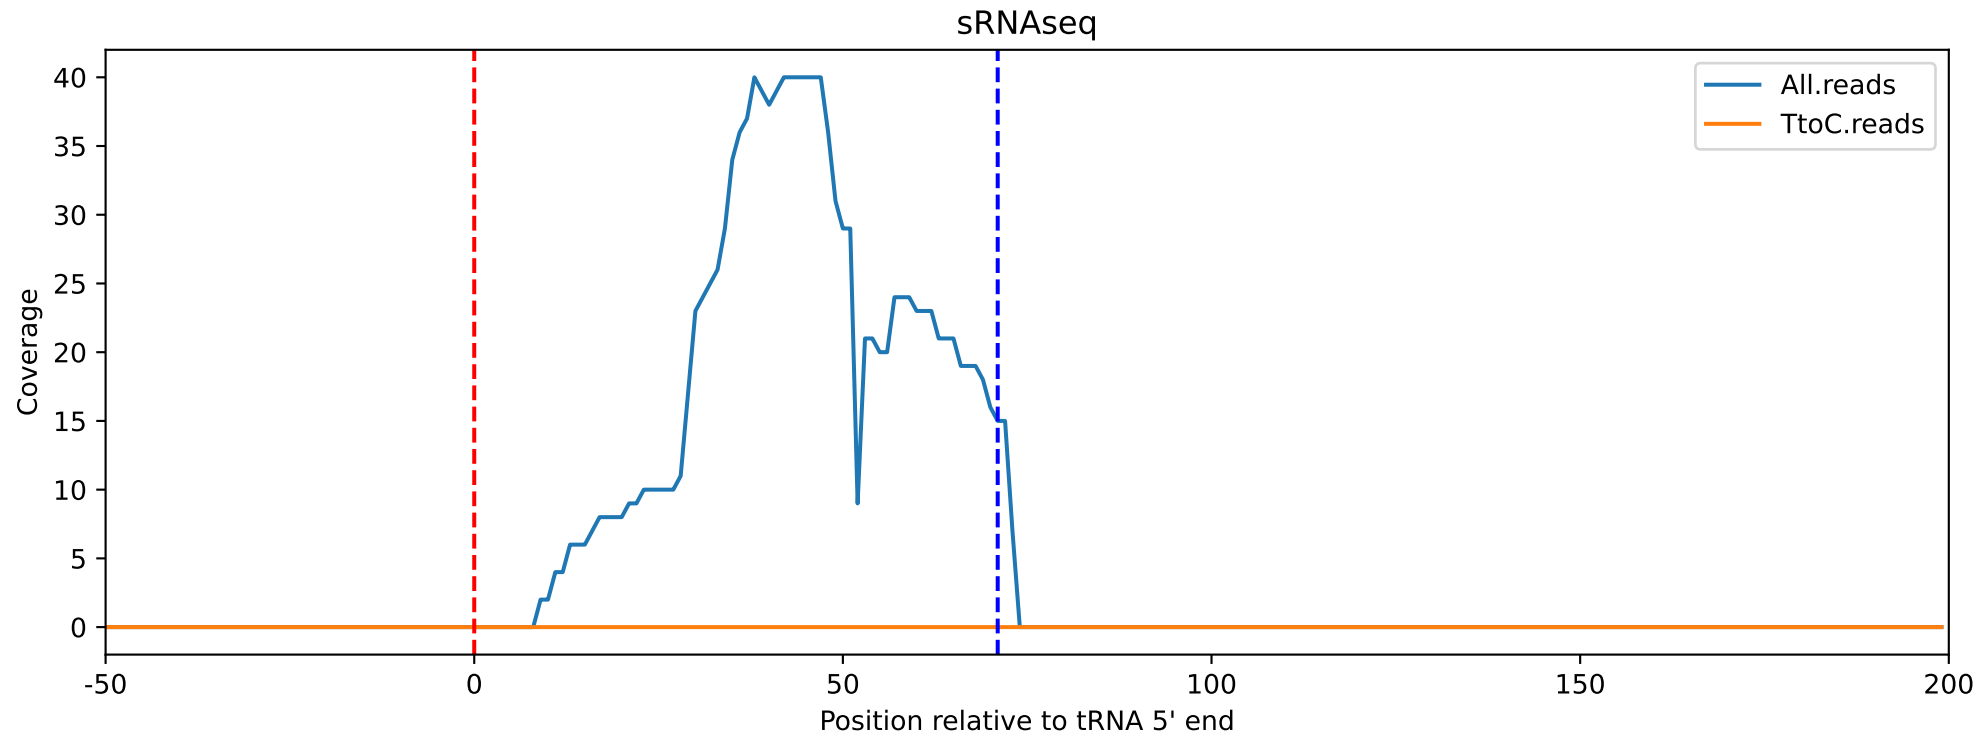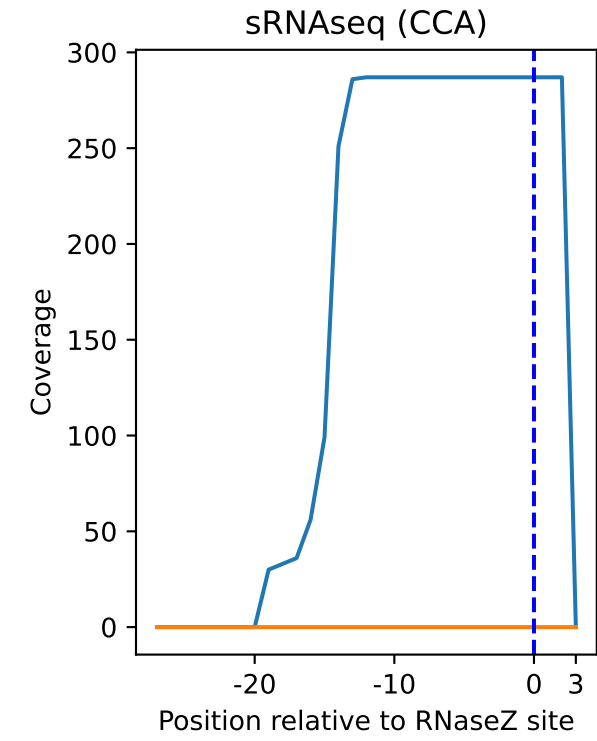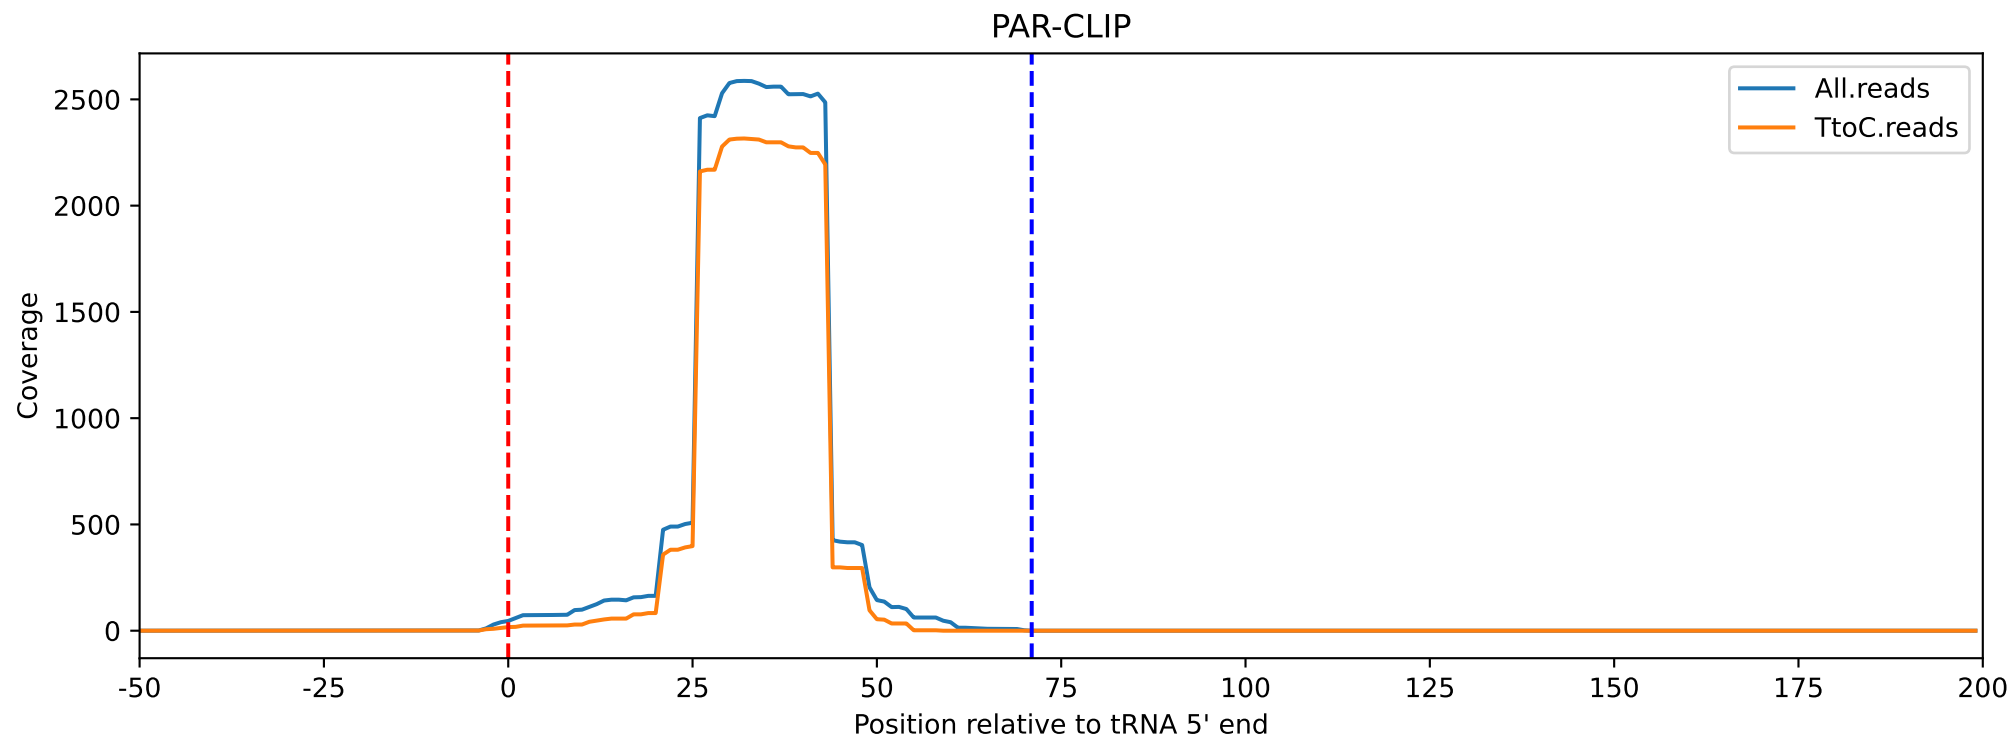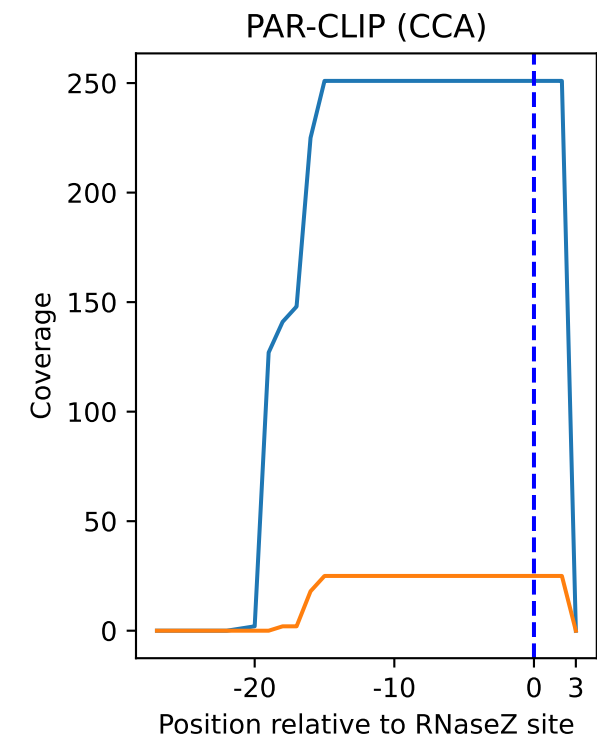

# tRNA-Val-CAC-2-1

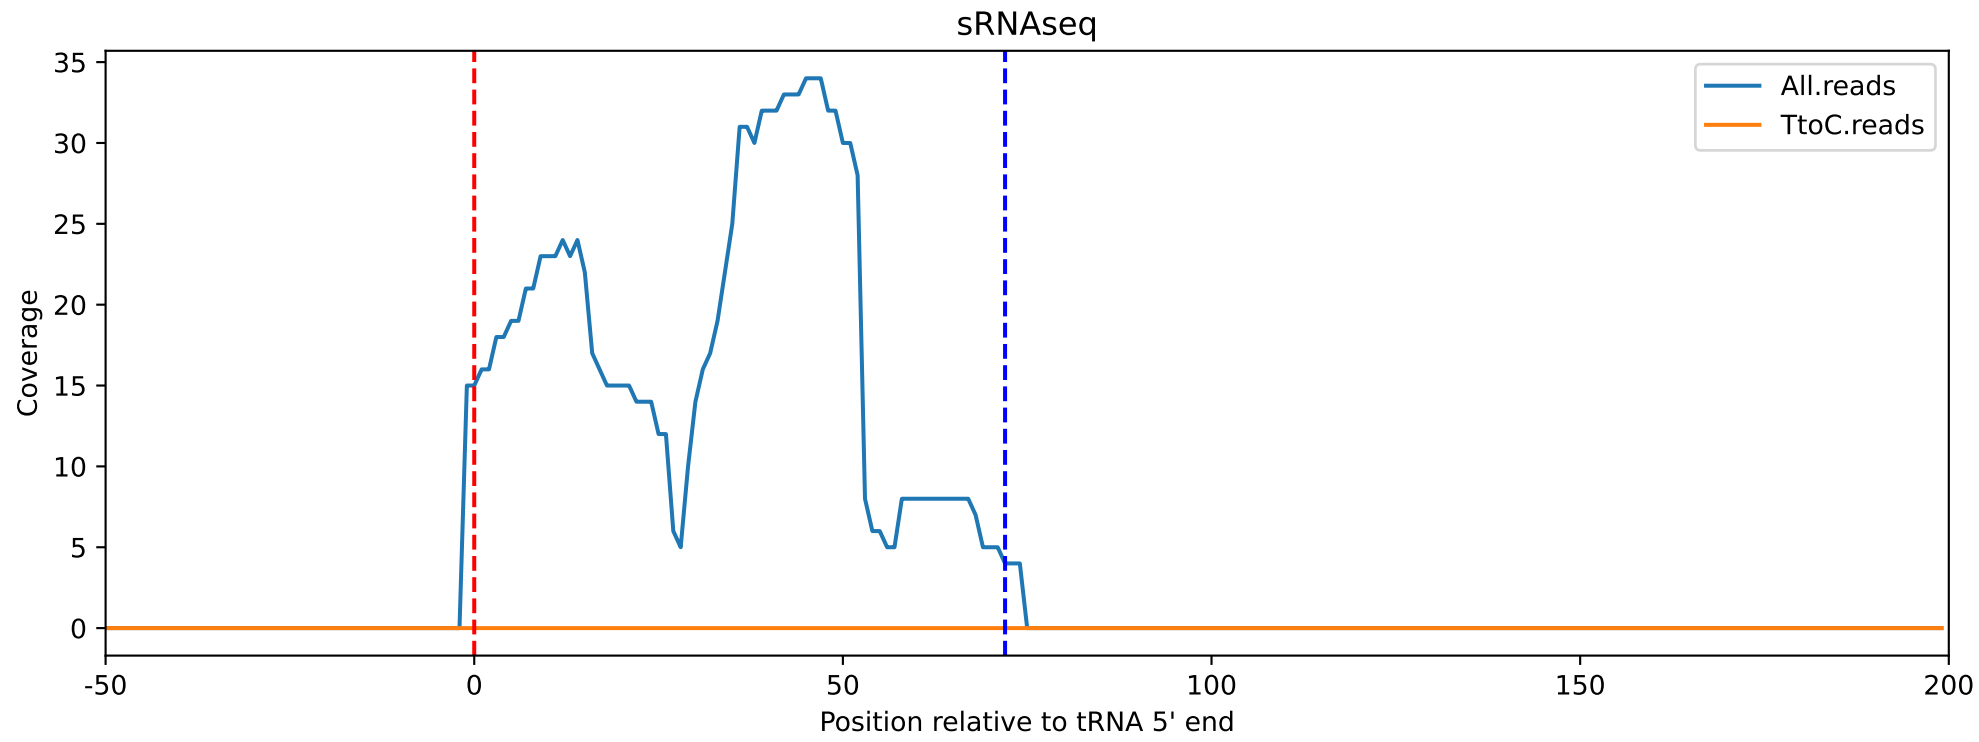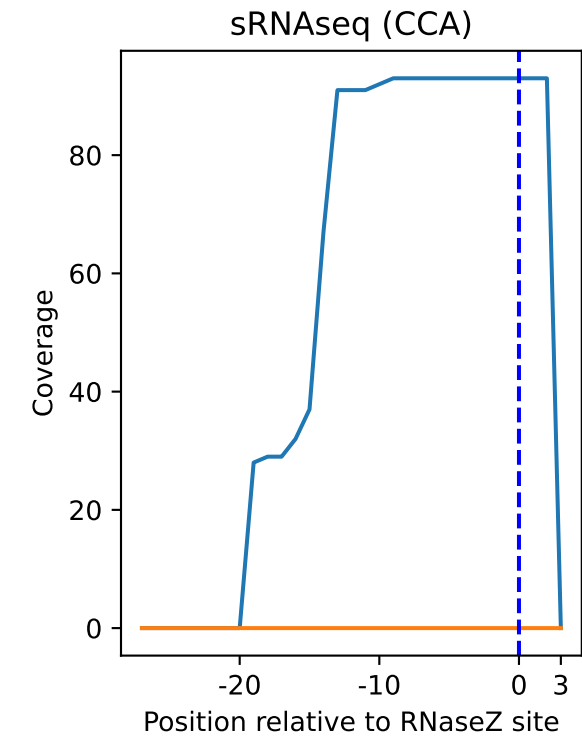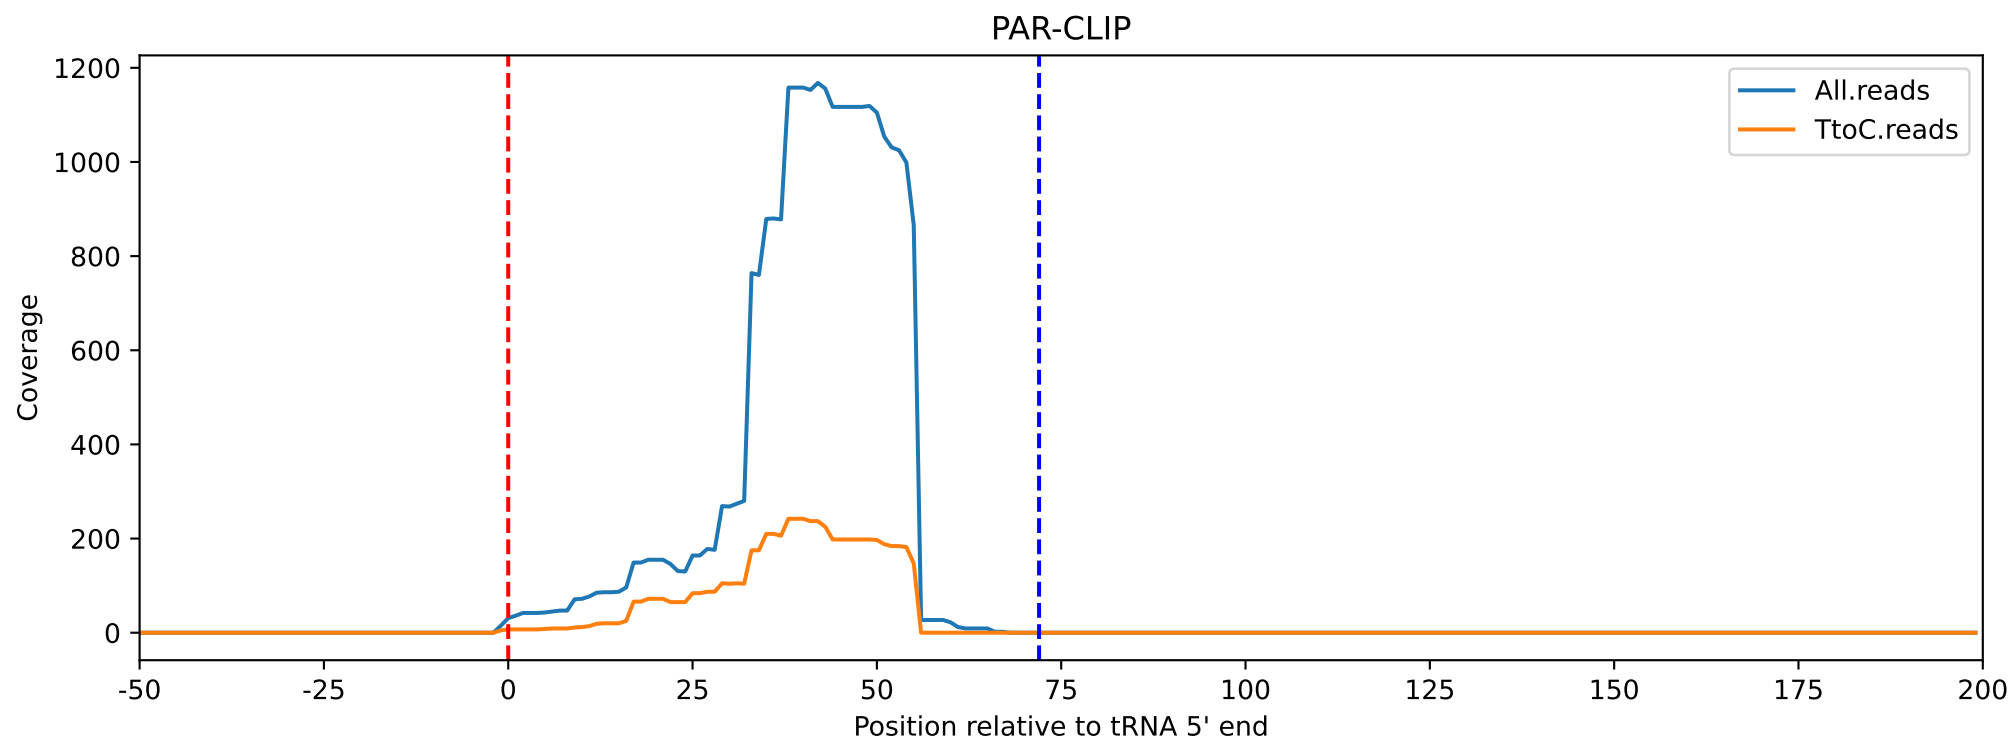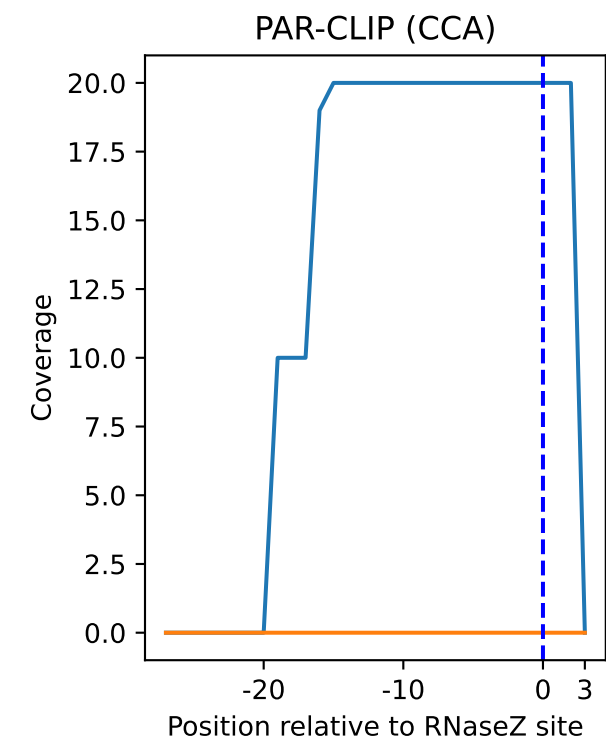

# tRNA-Val-CAC-2-3

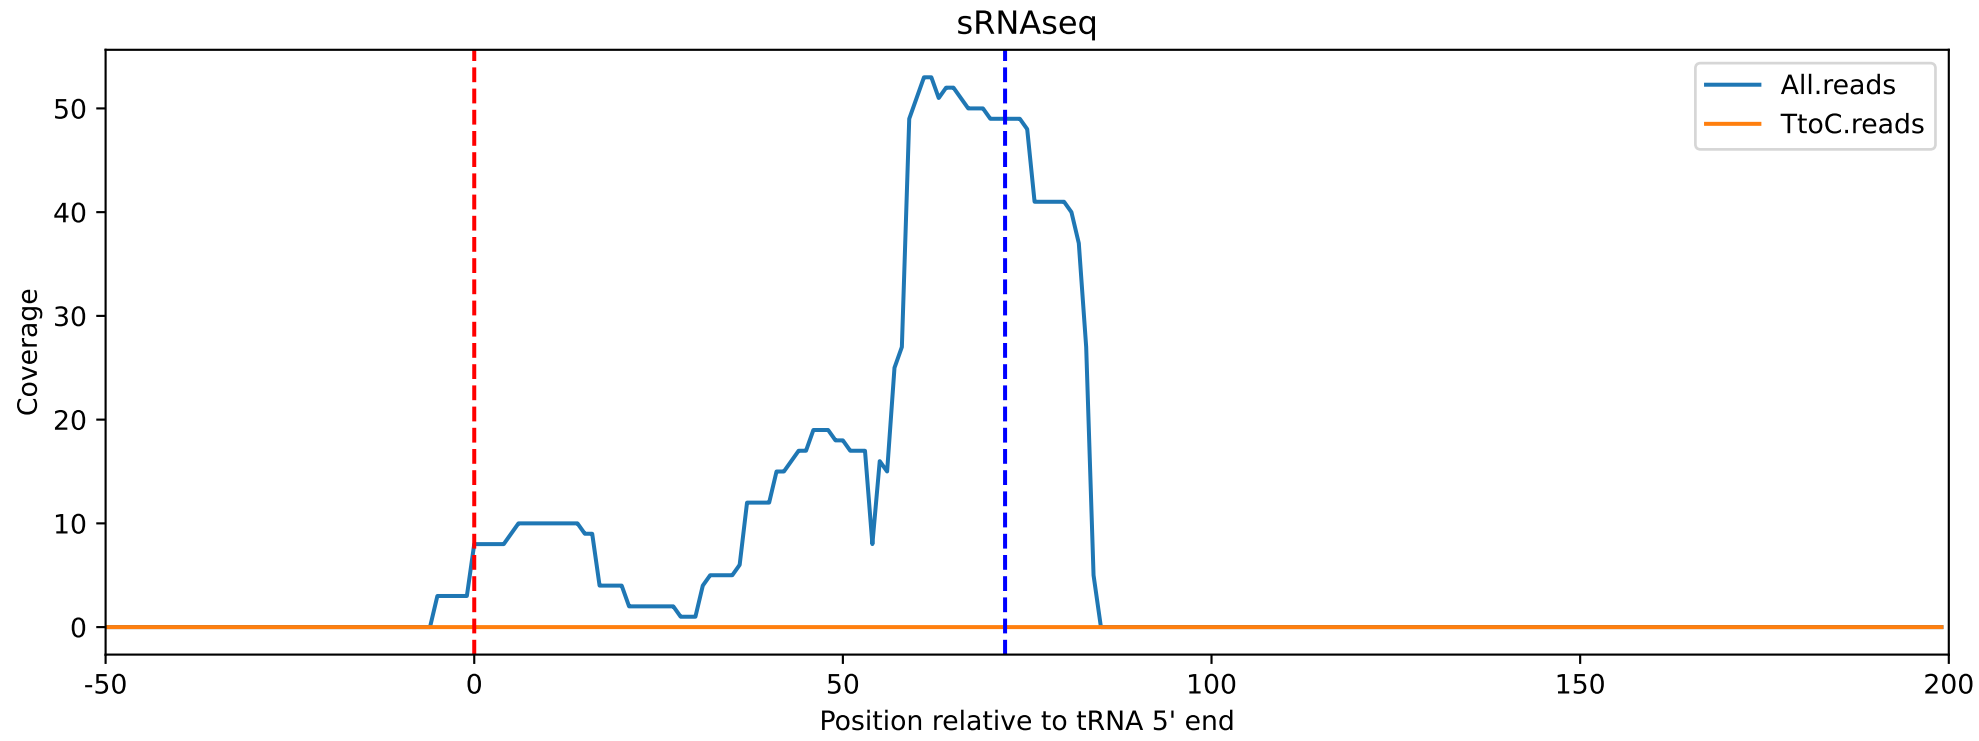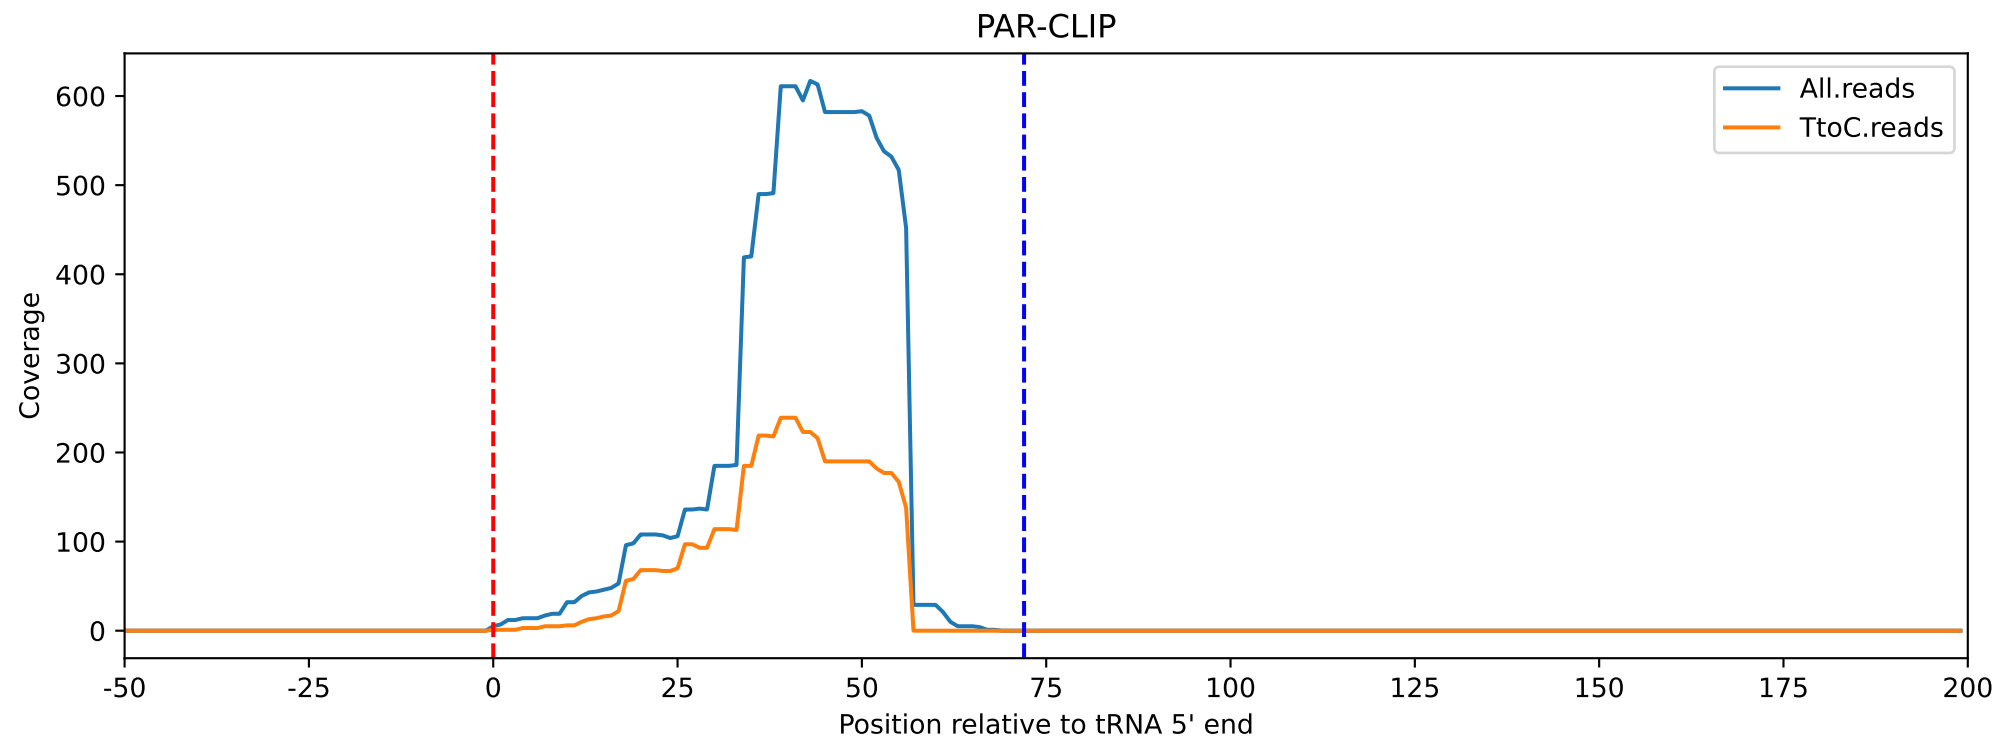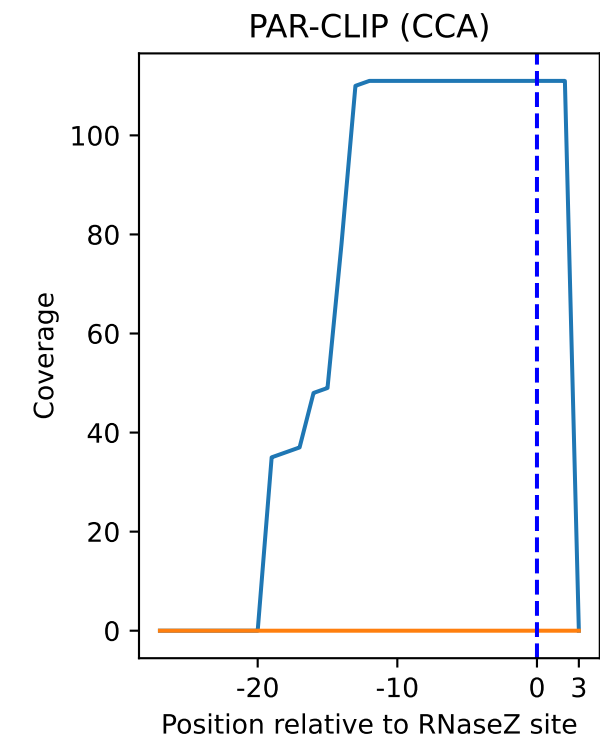

# tRNA-Arg-ACG-1-6

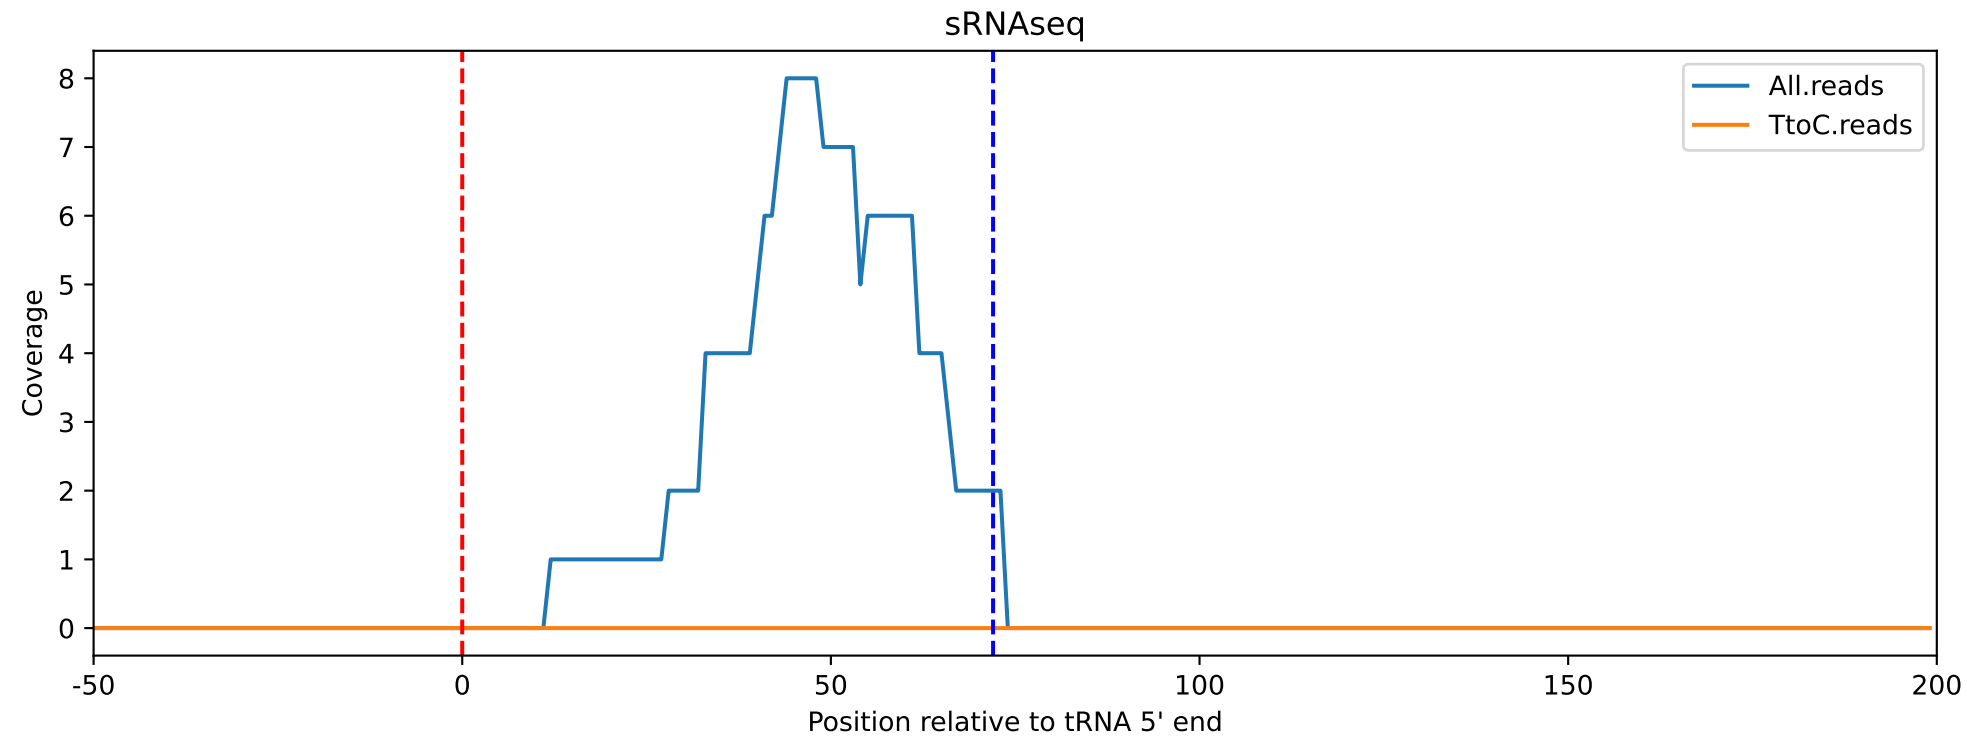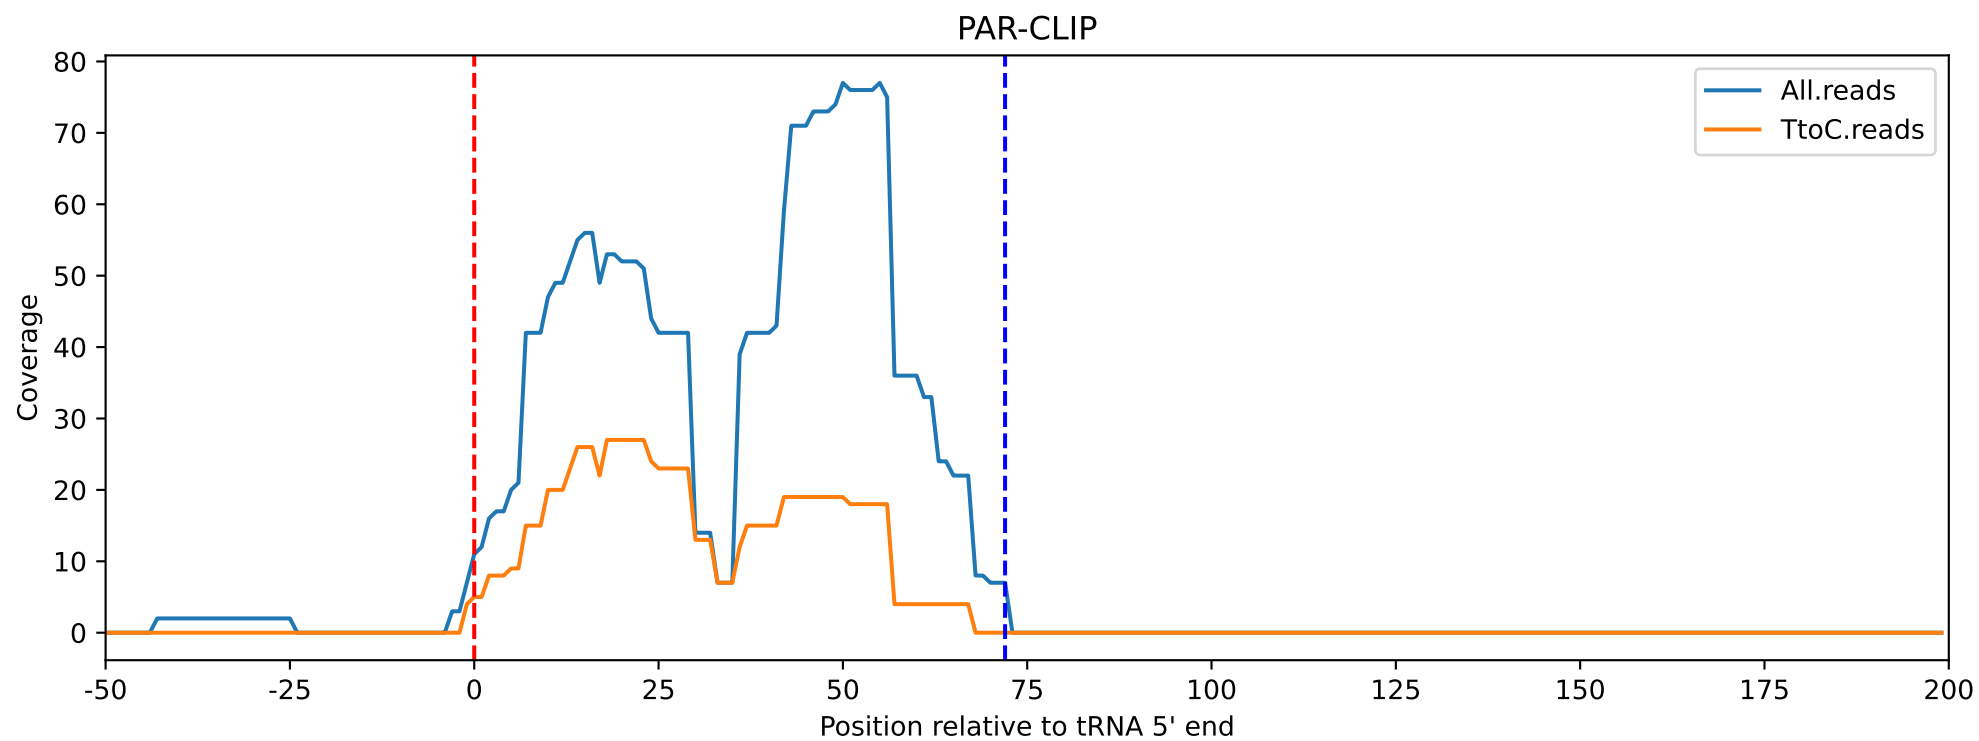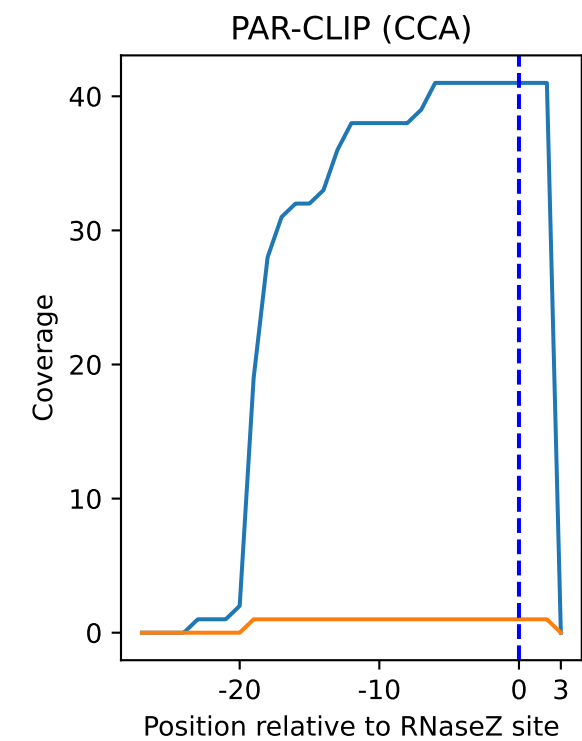

# tRNA-Arg-ACG-1-9

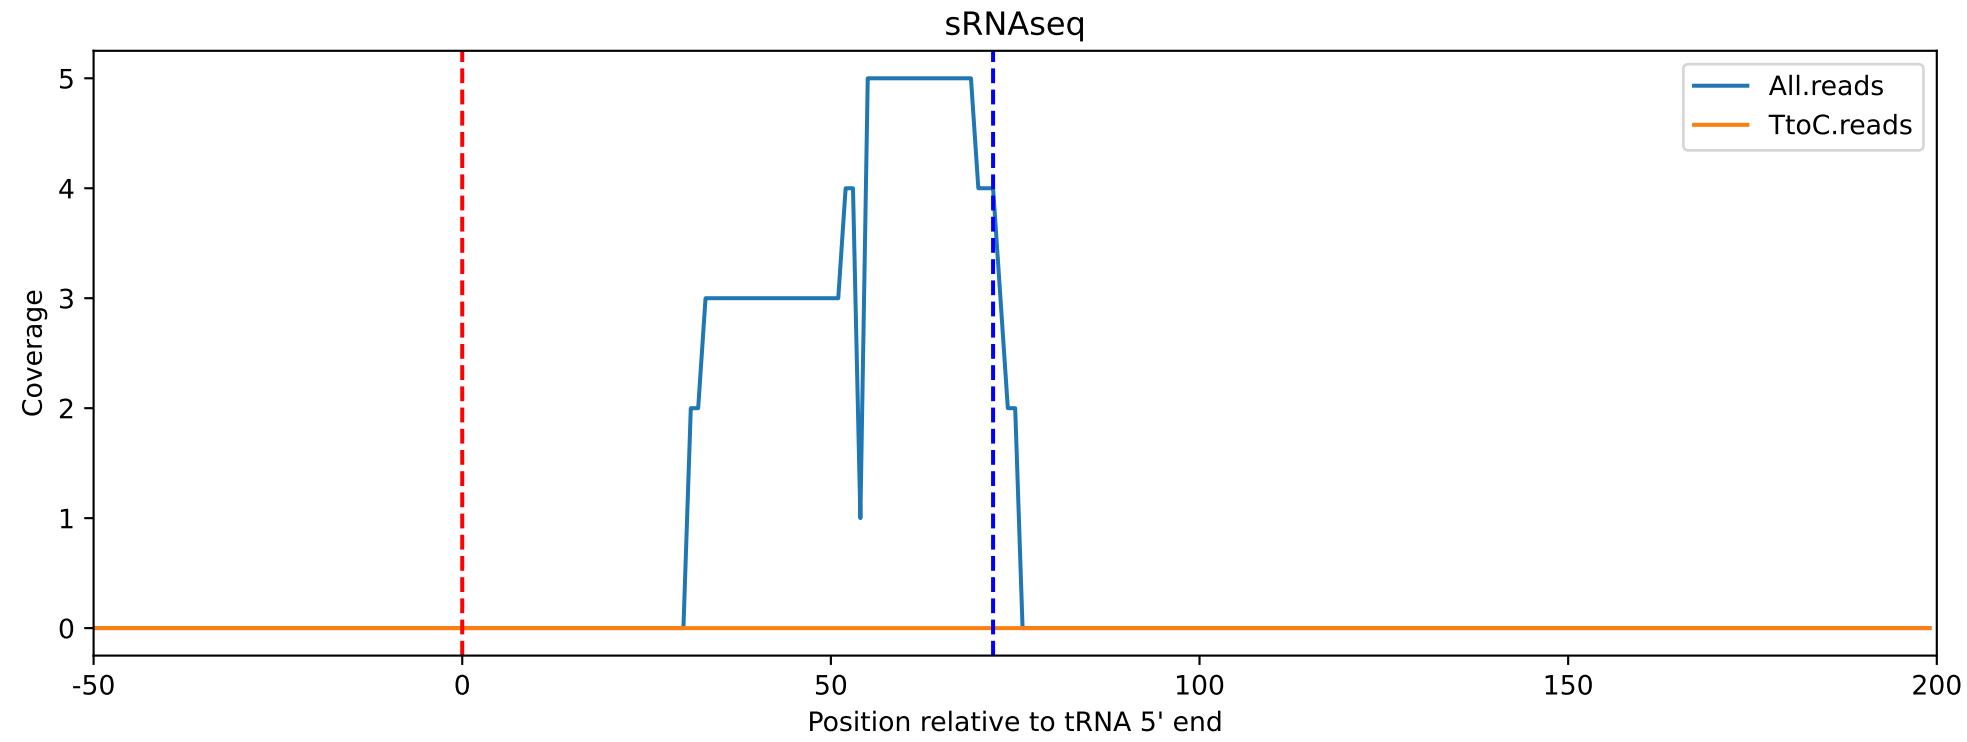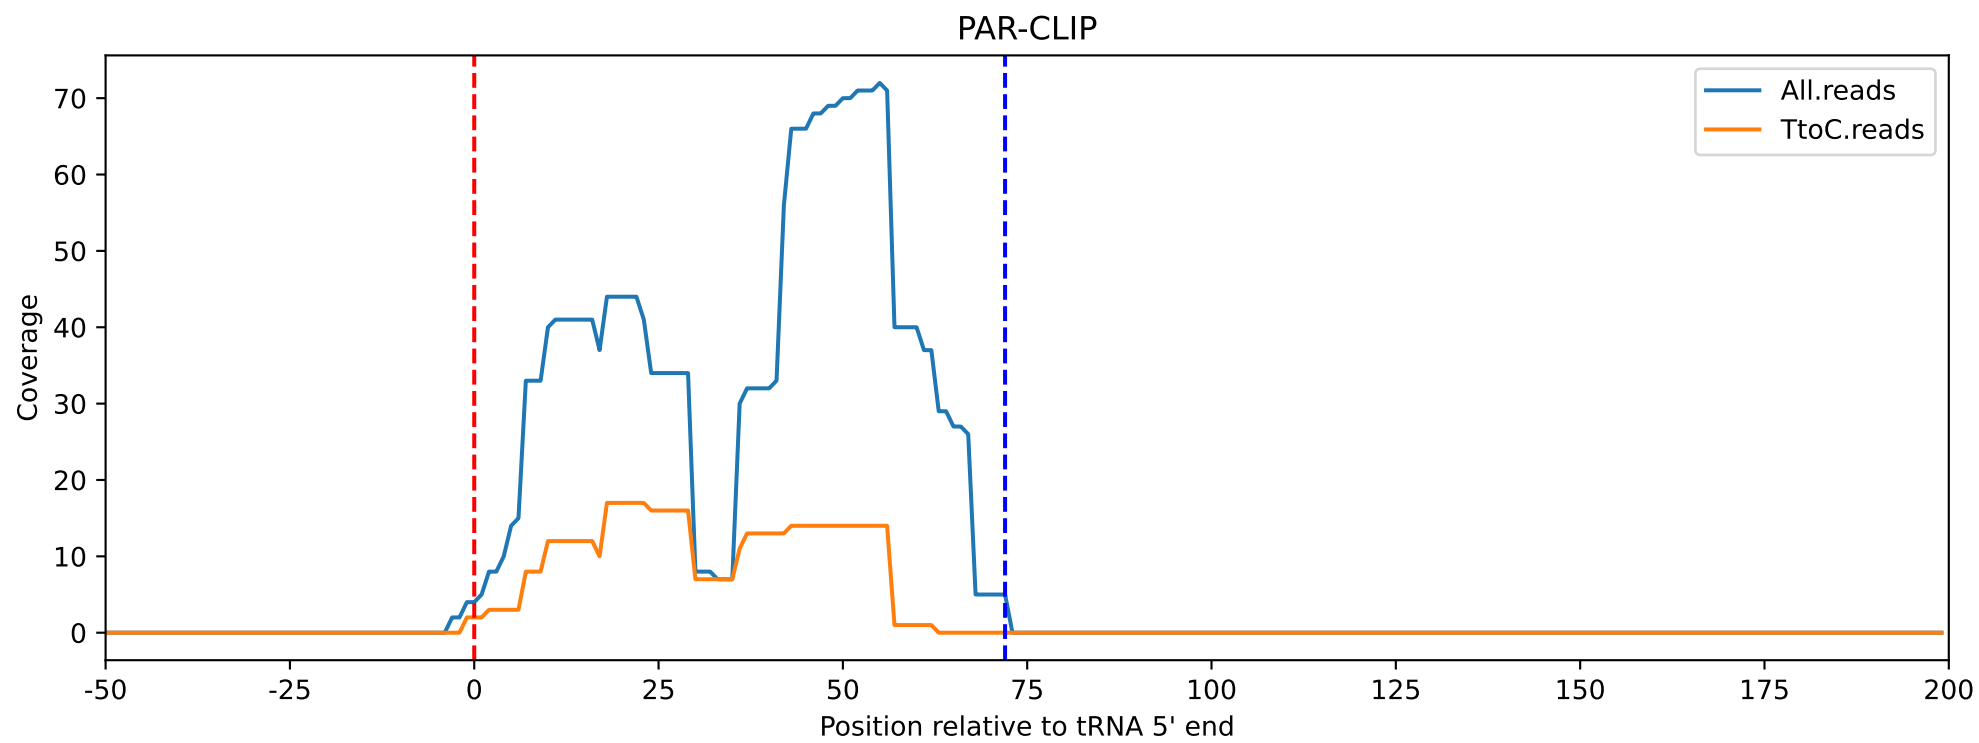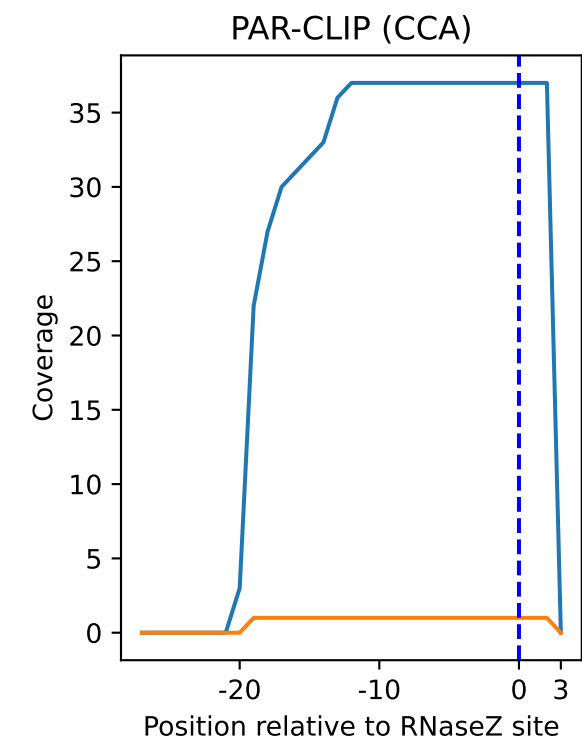

# tRNA-Arg-ACG-1-10

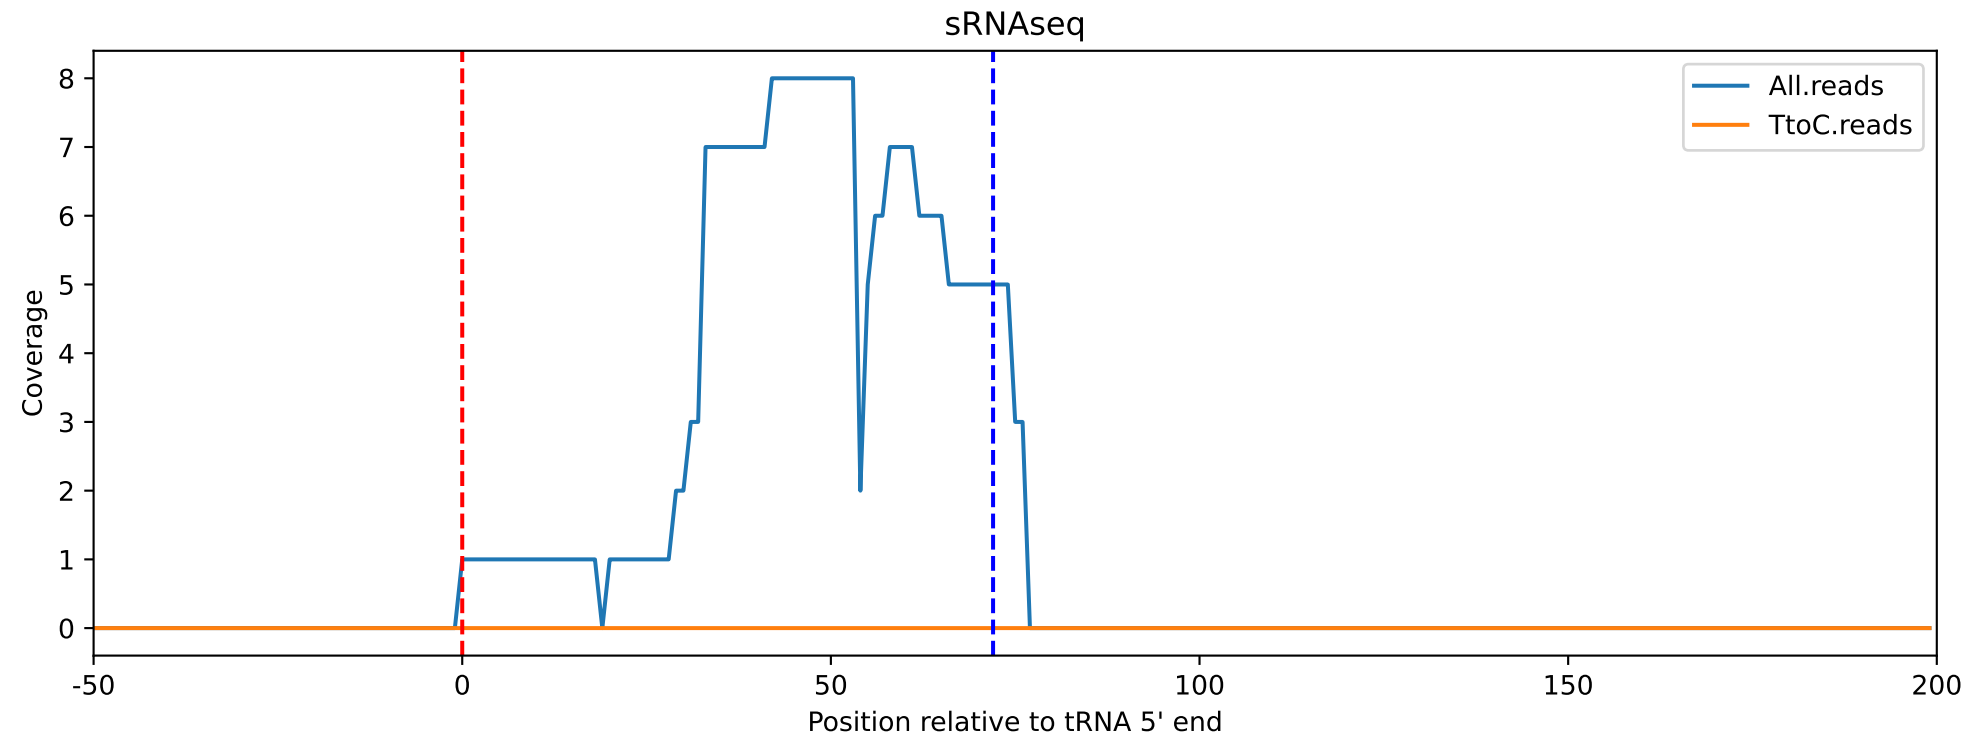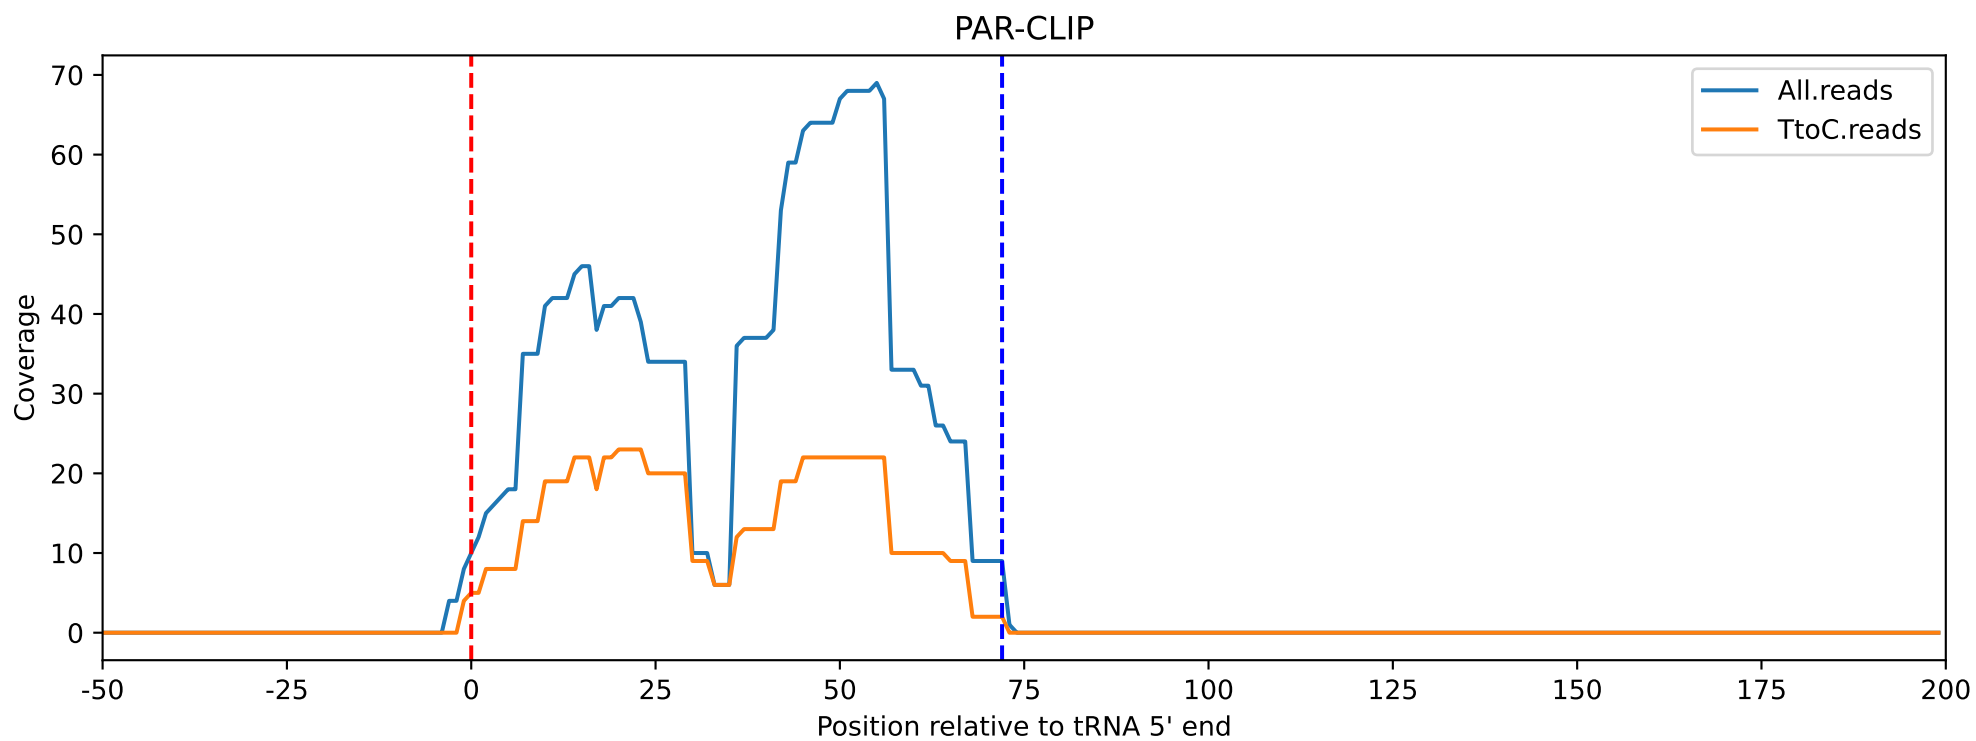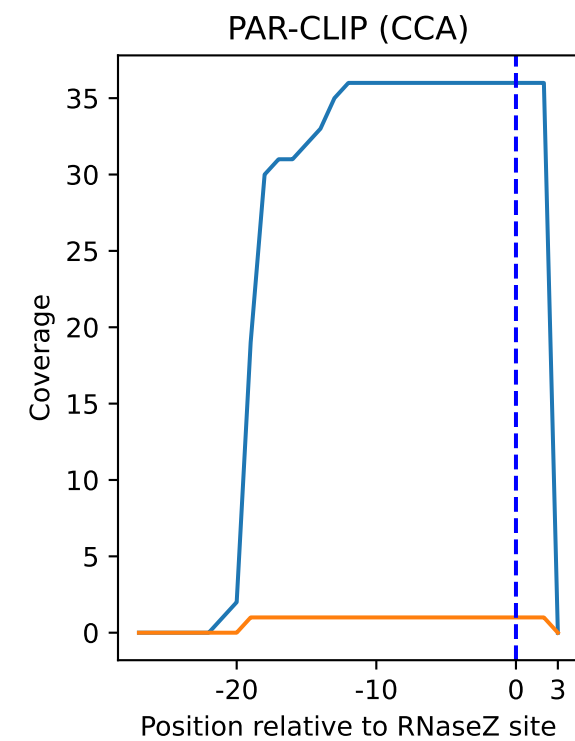



# tRNA-Tyr-GTA-1-5

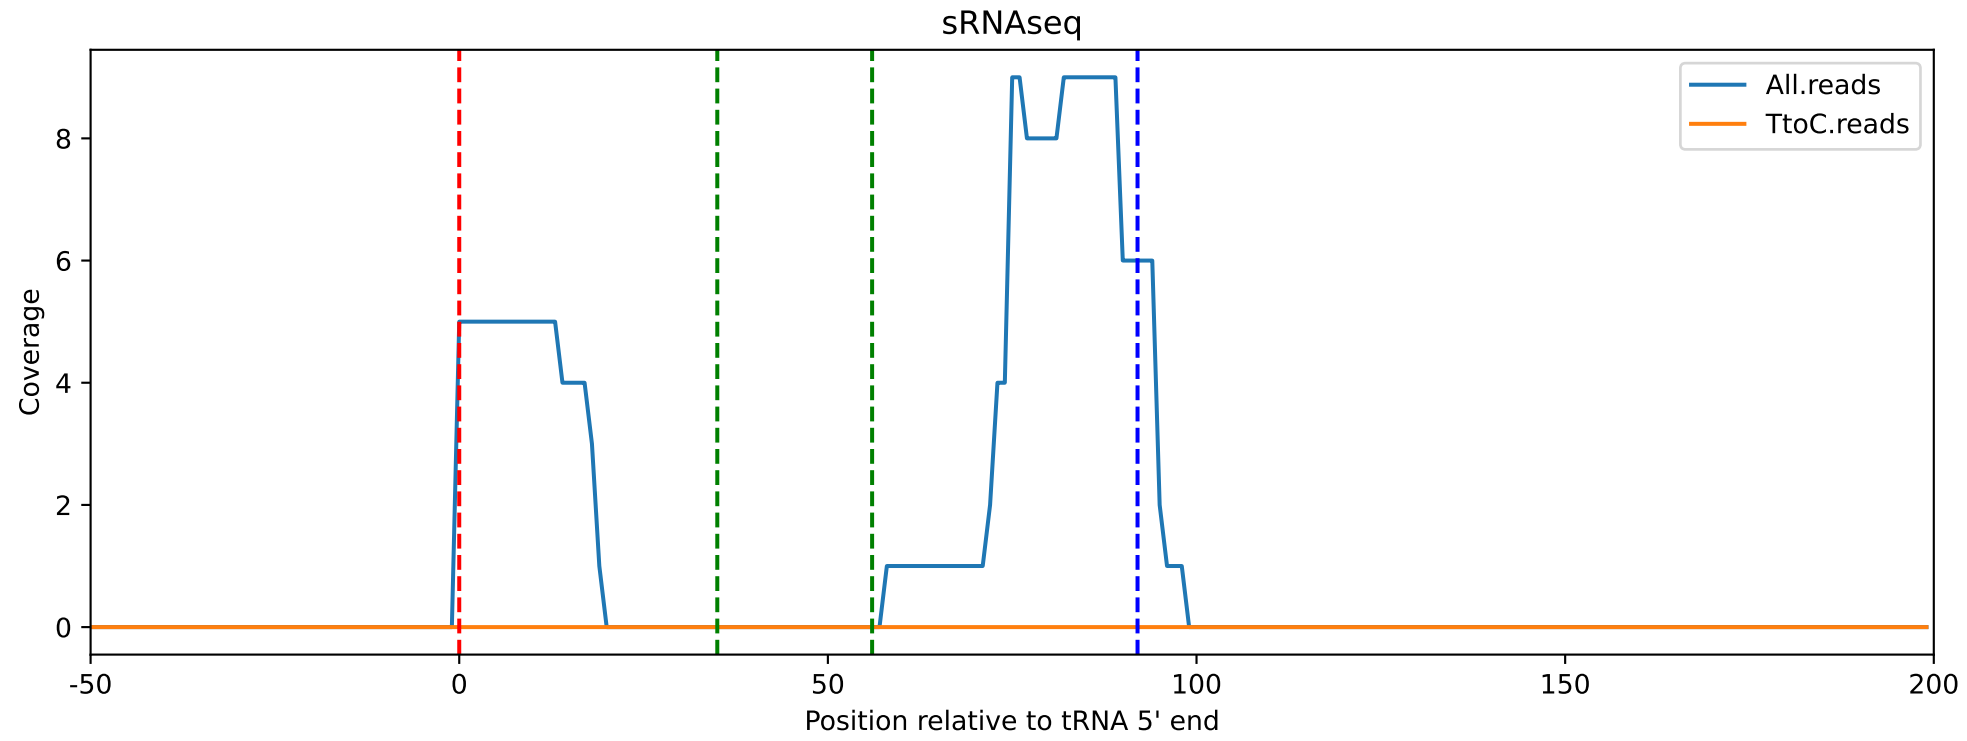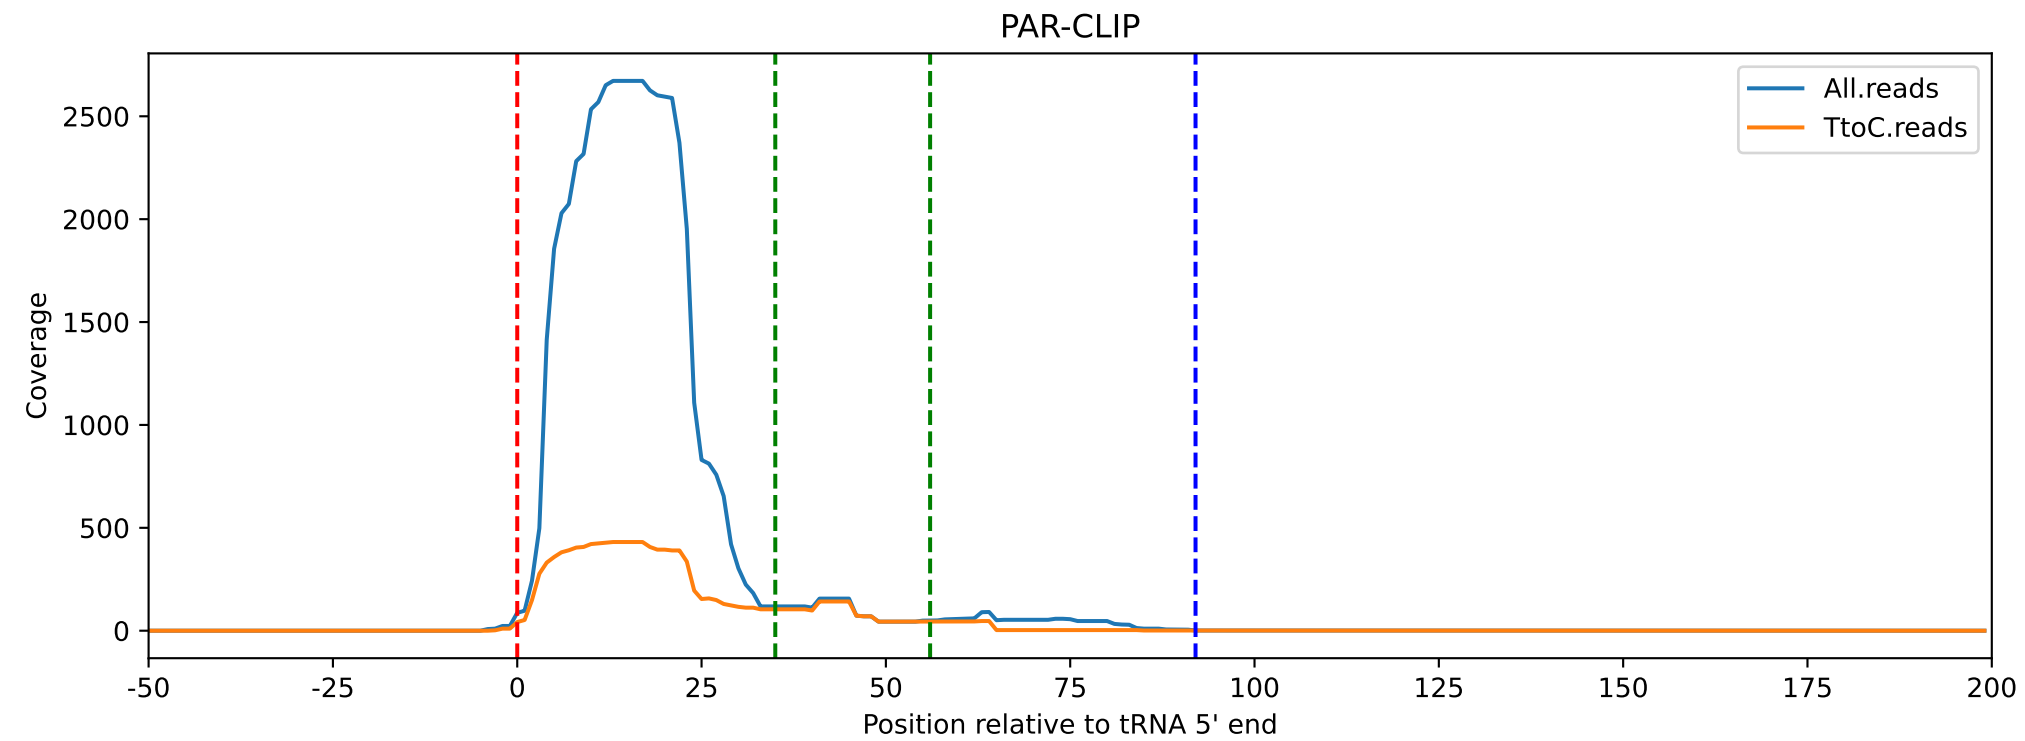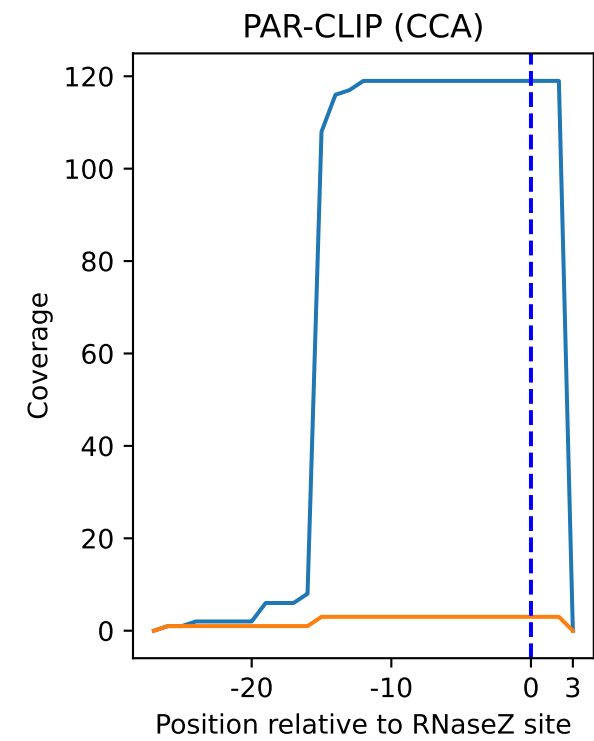

# tRNA-Tyr-GTA-1-7

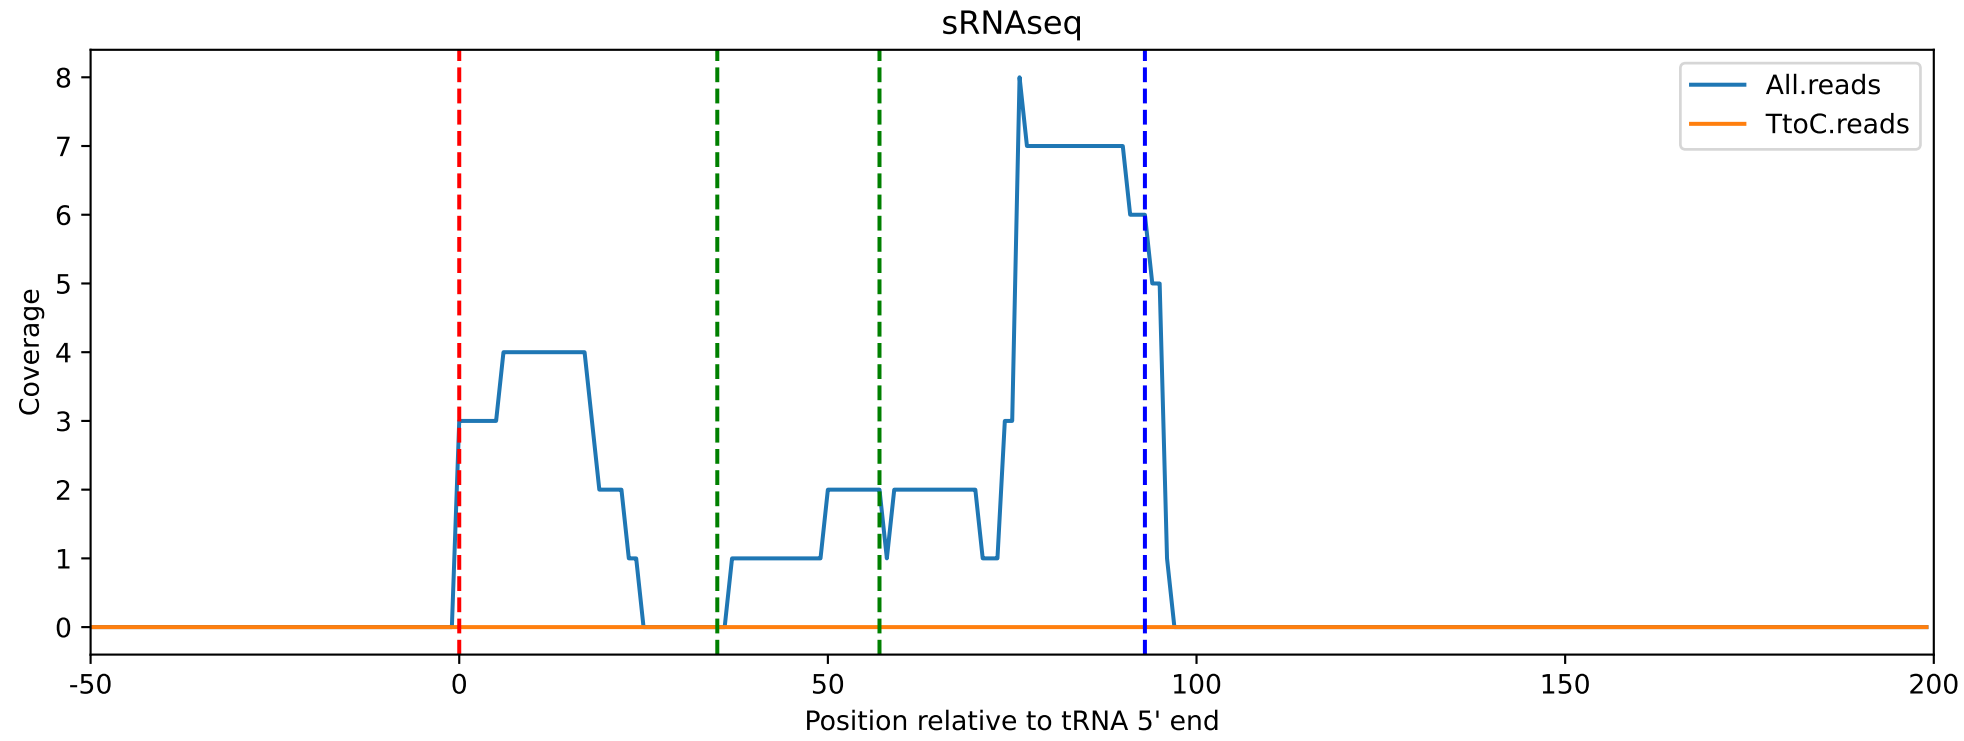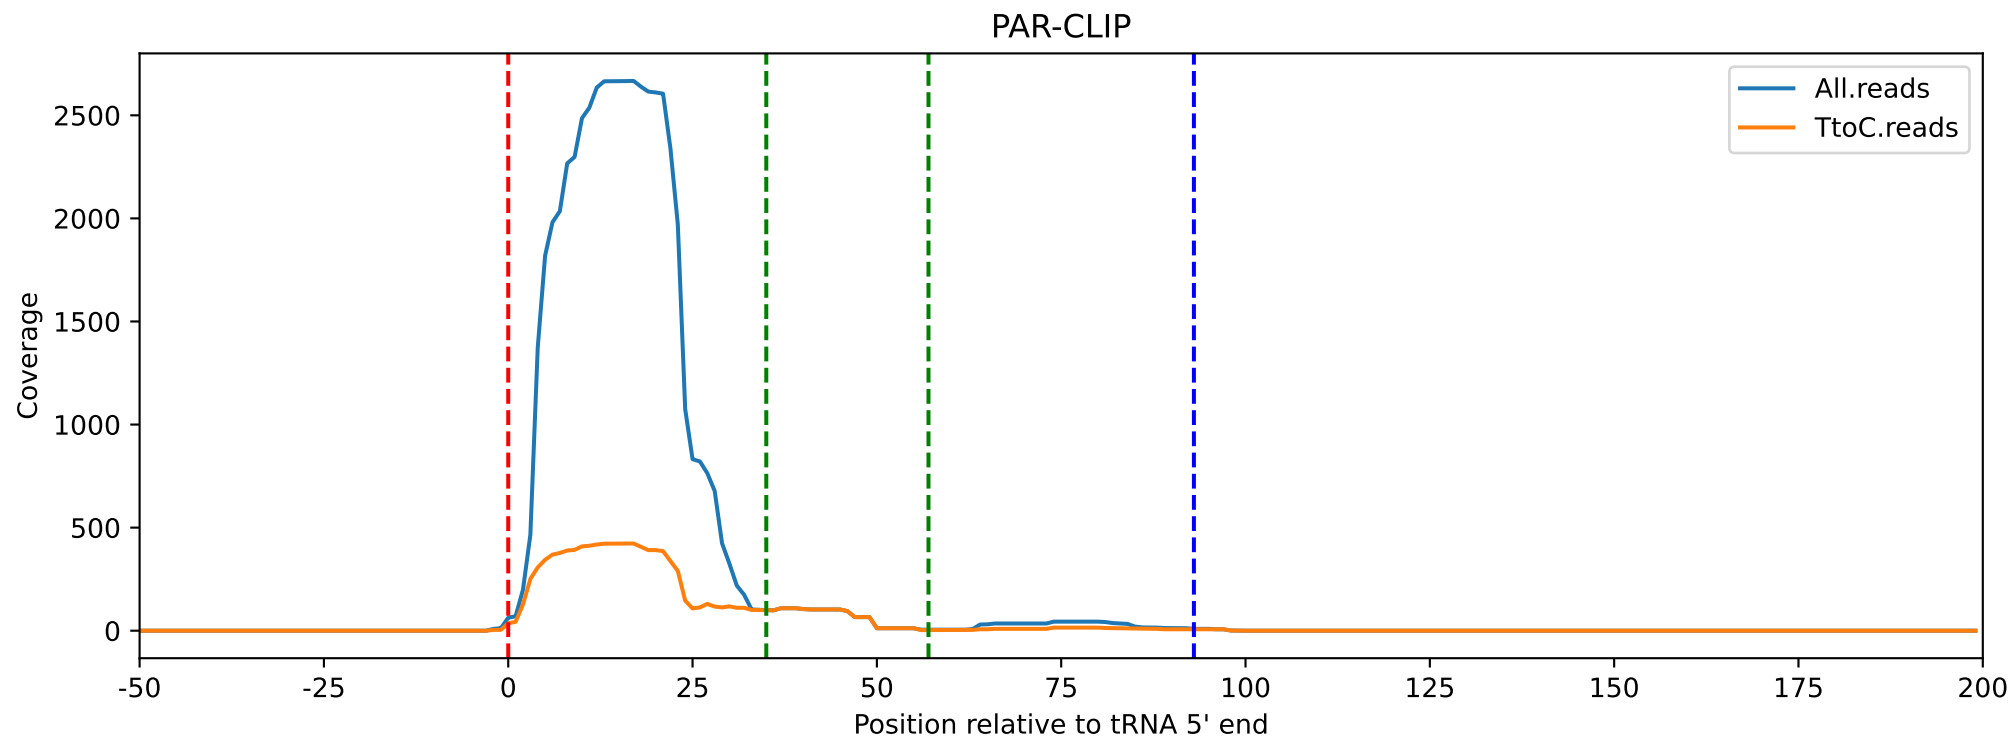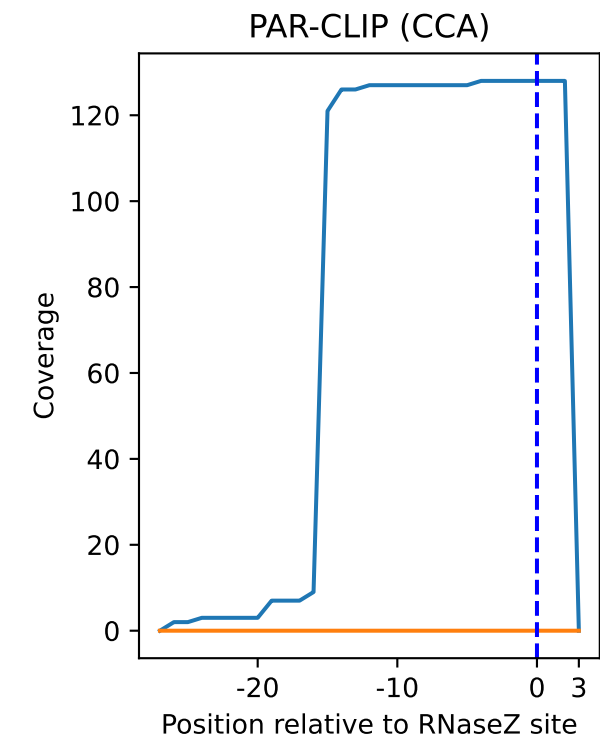

# tRNA-Arg-TCG-2-3

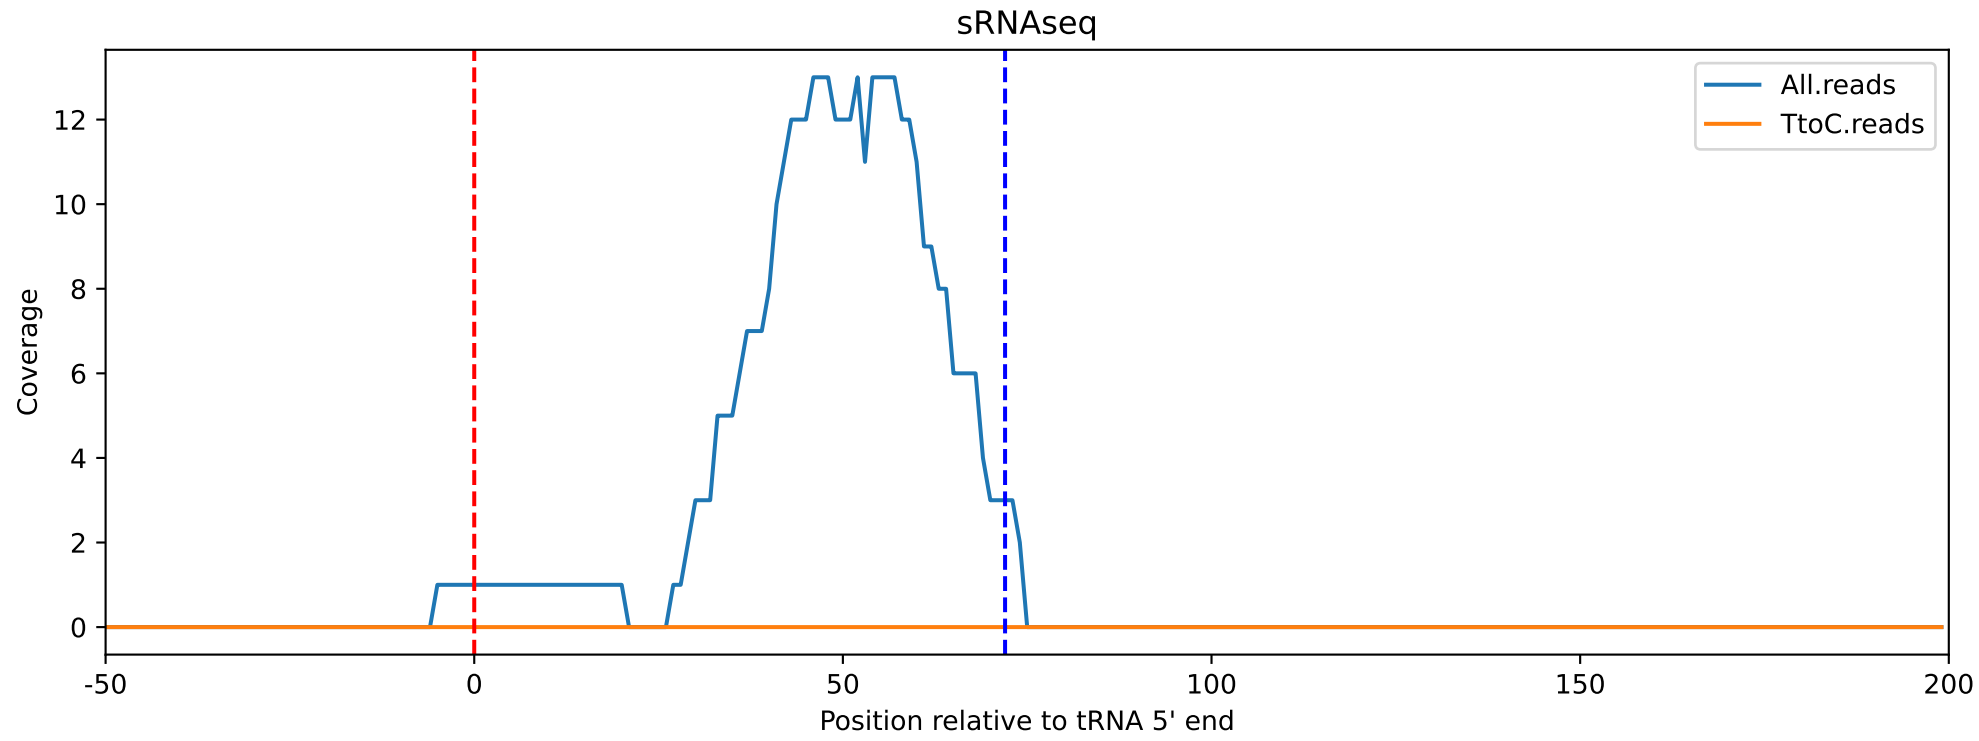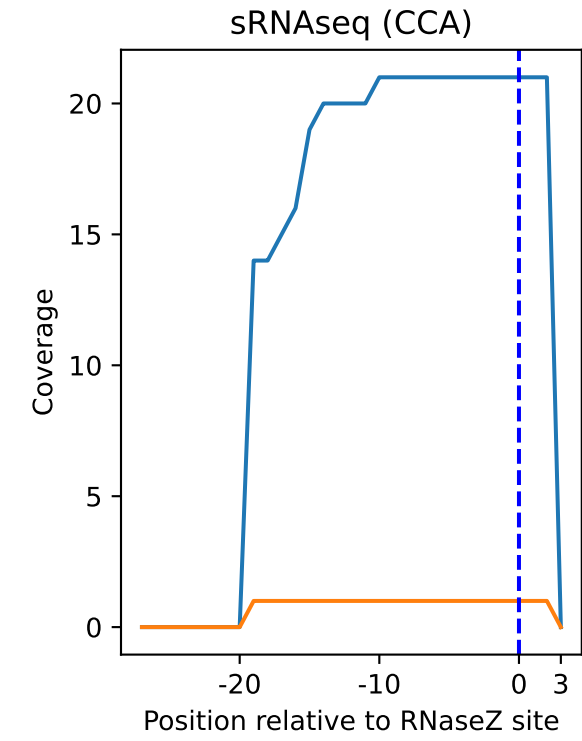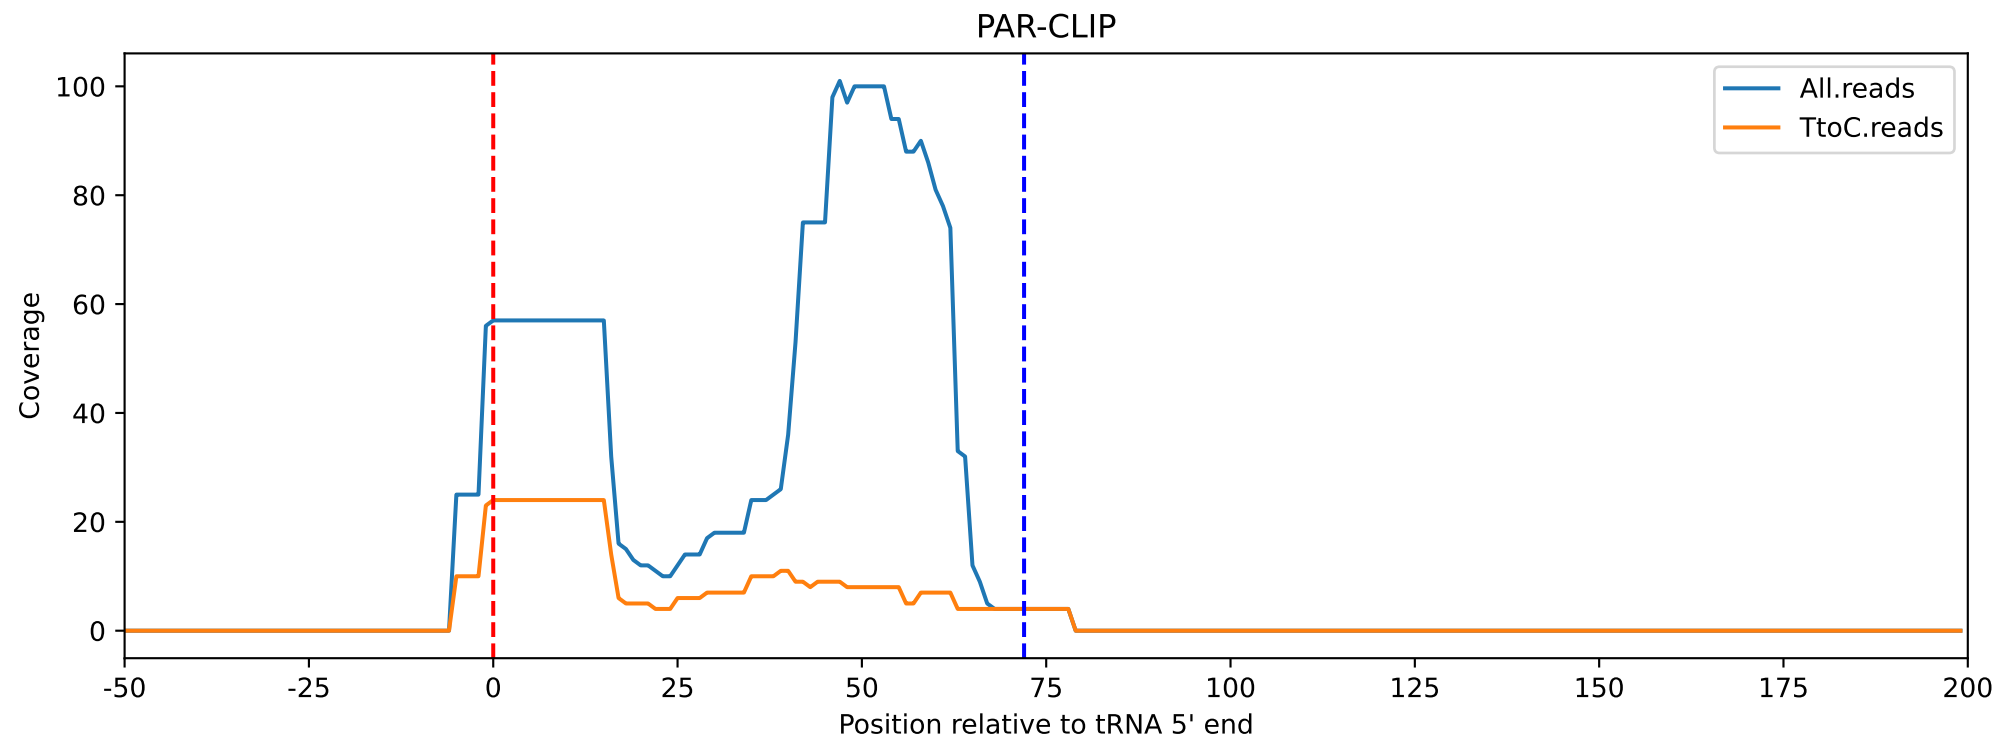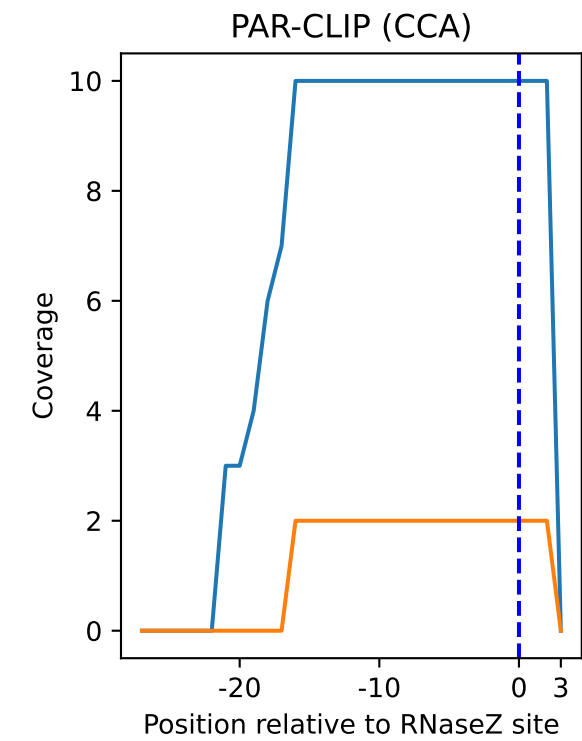

# tRNA-Arg-TCG-2-4

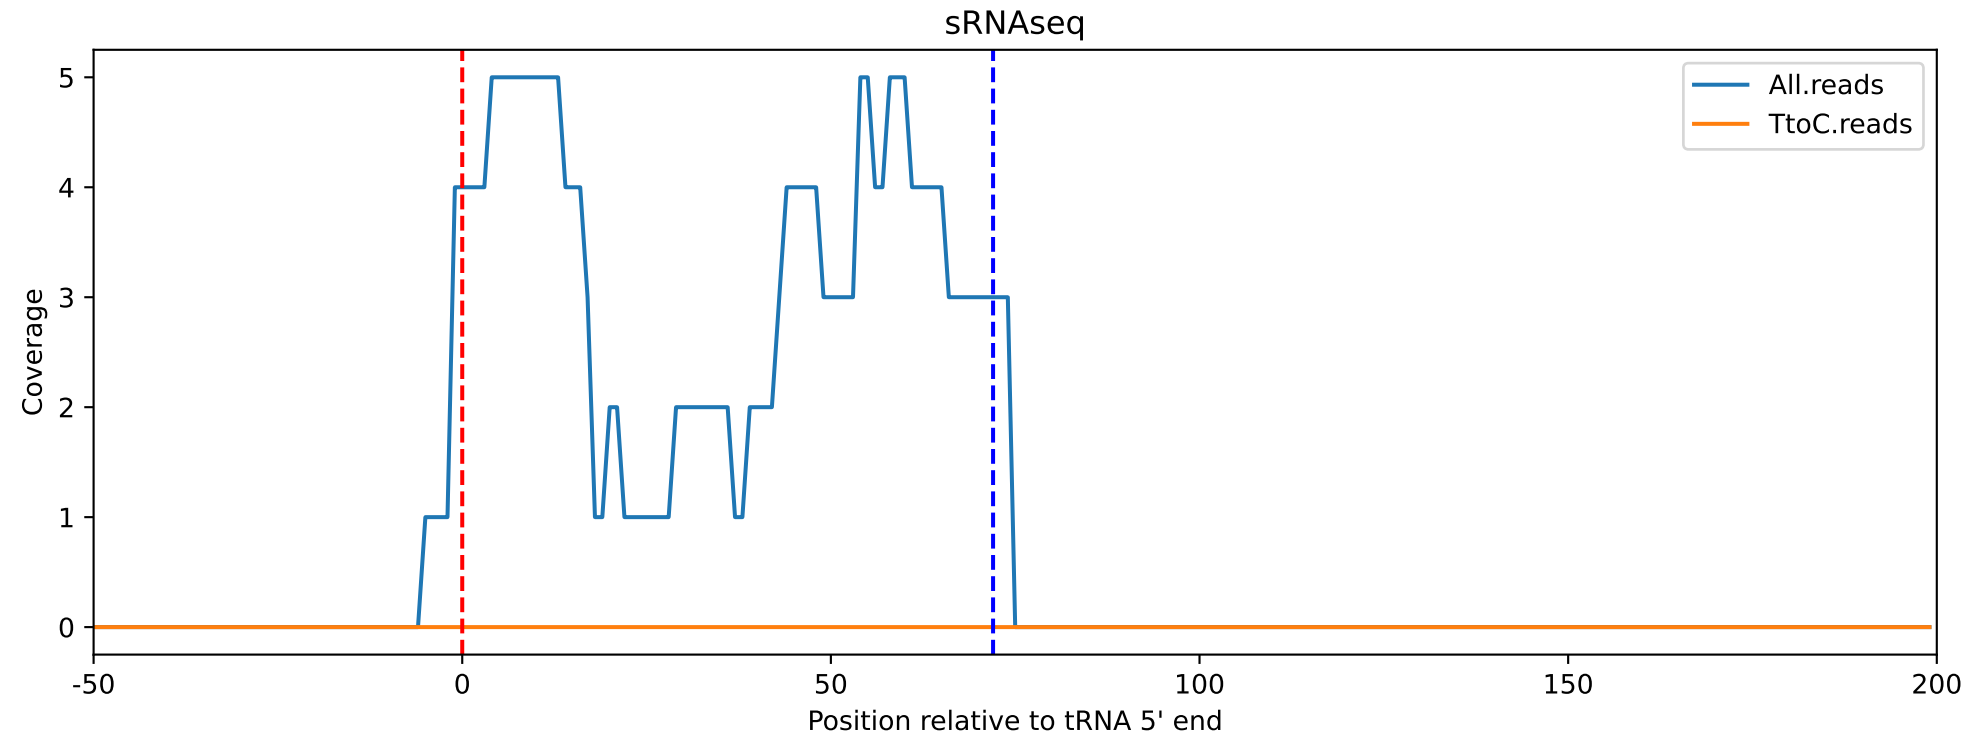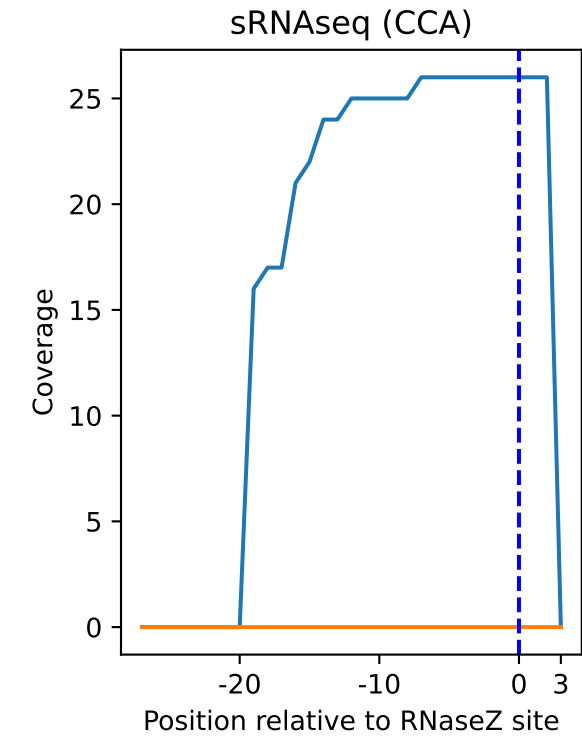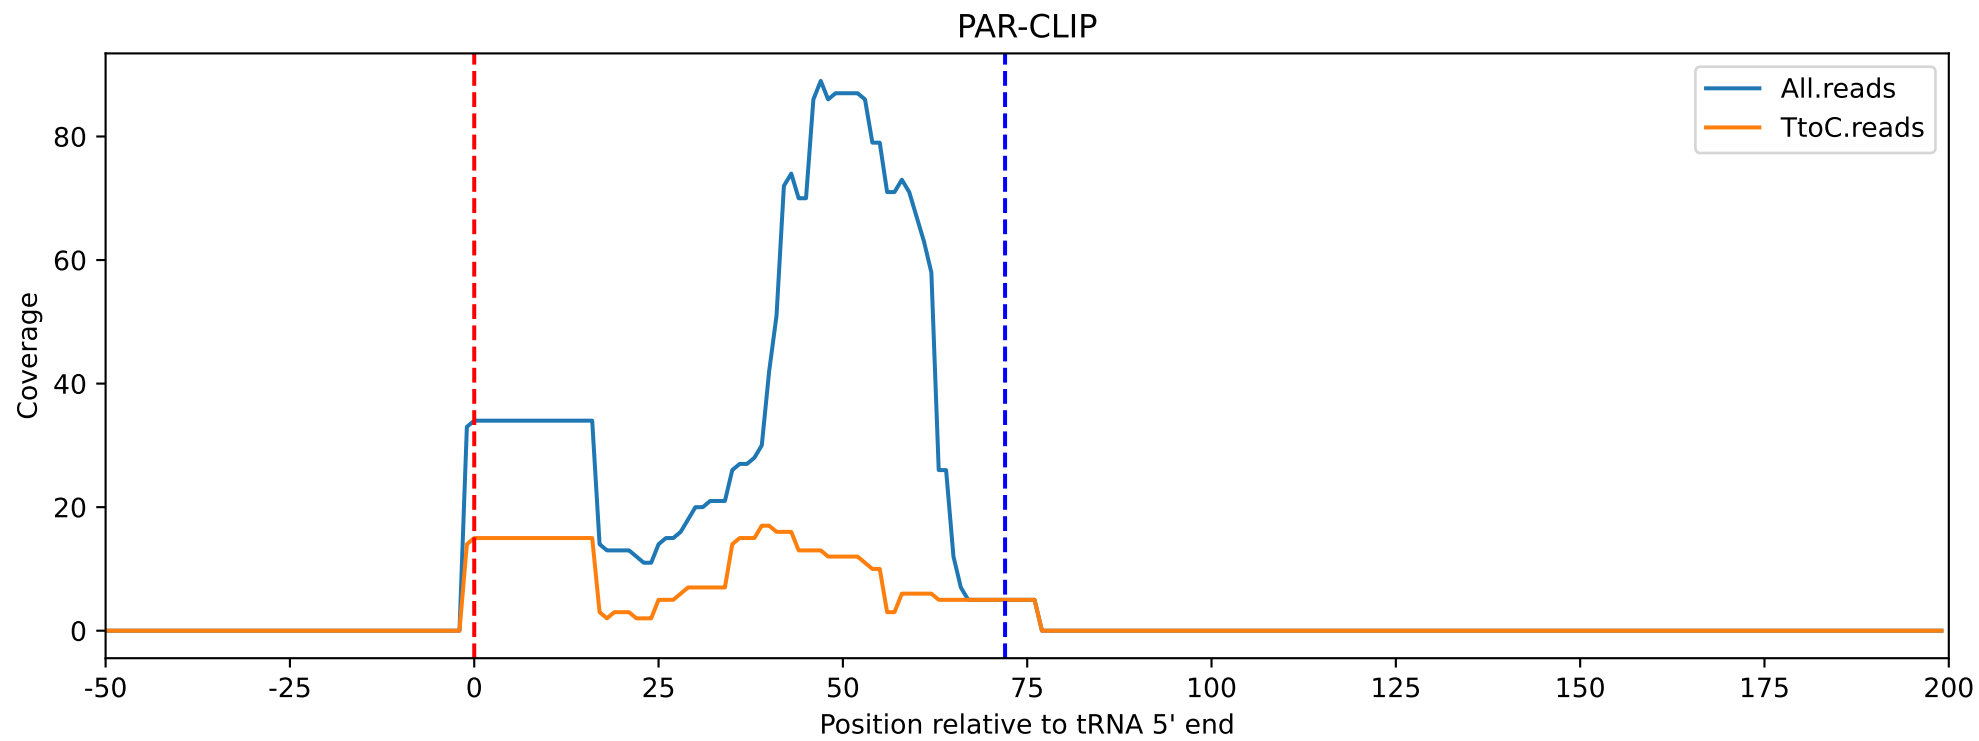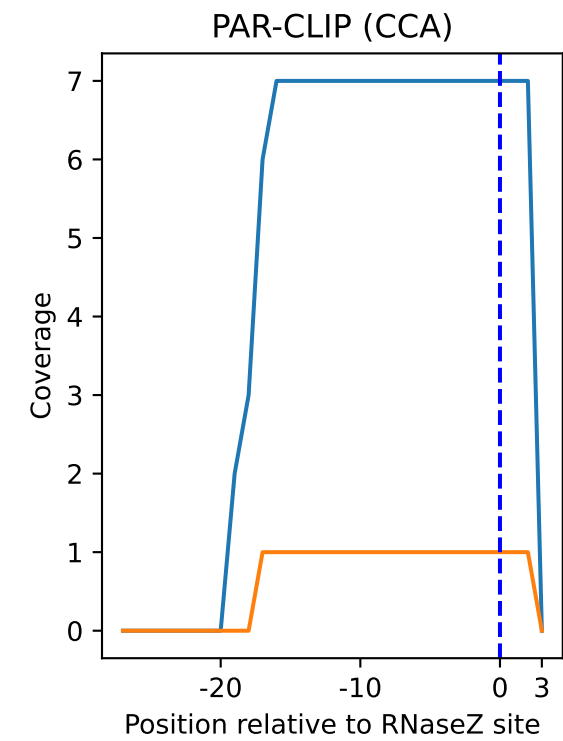

# tRNA-Thr-TGT-2-5

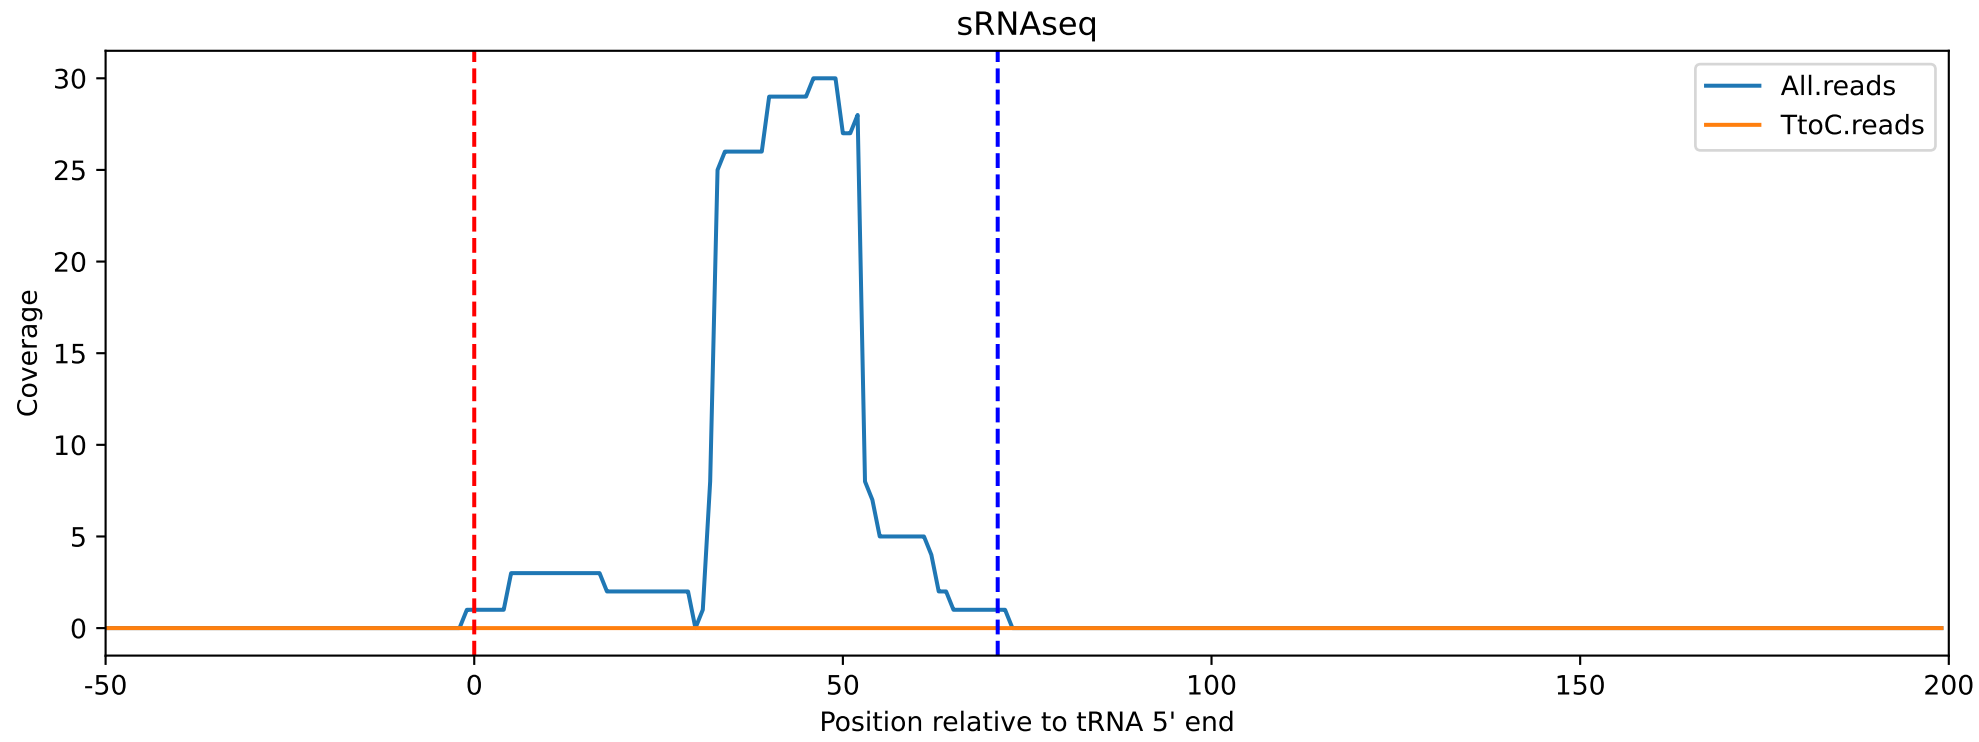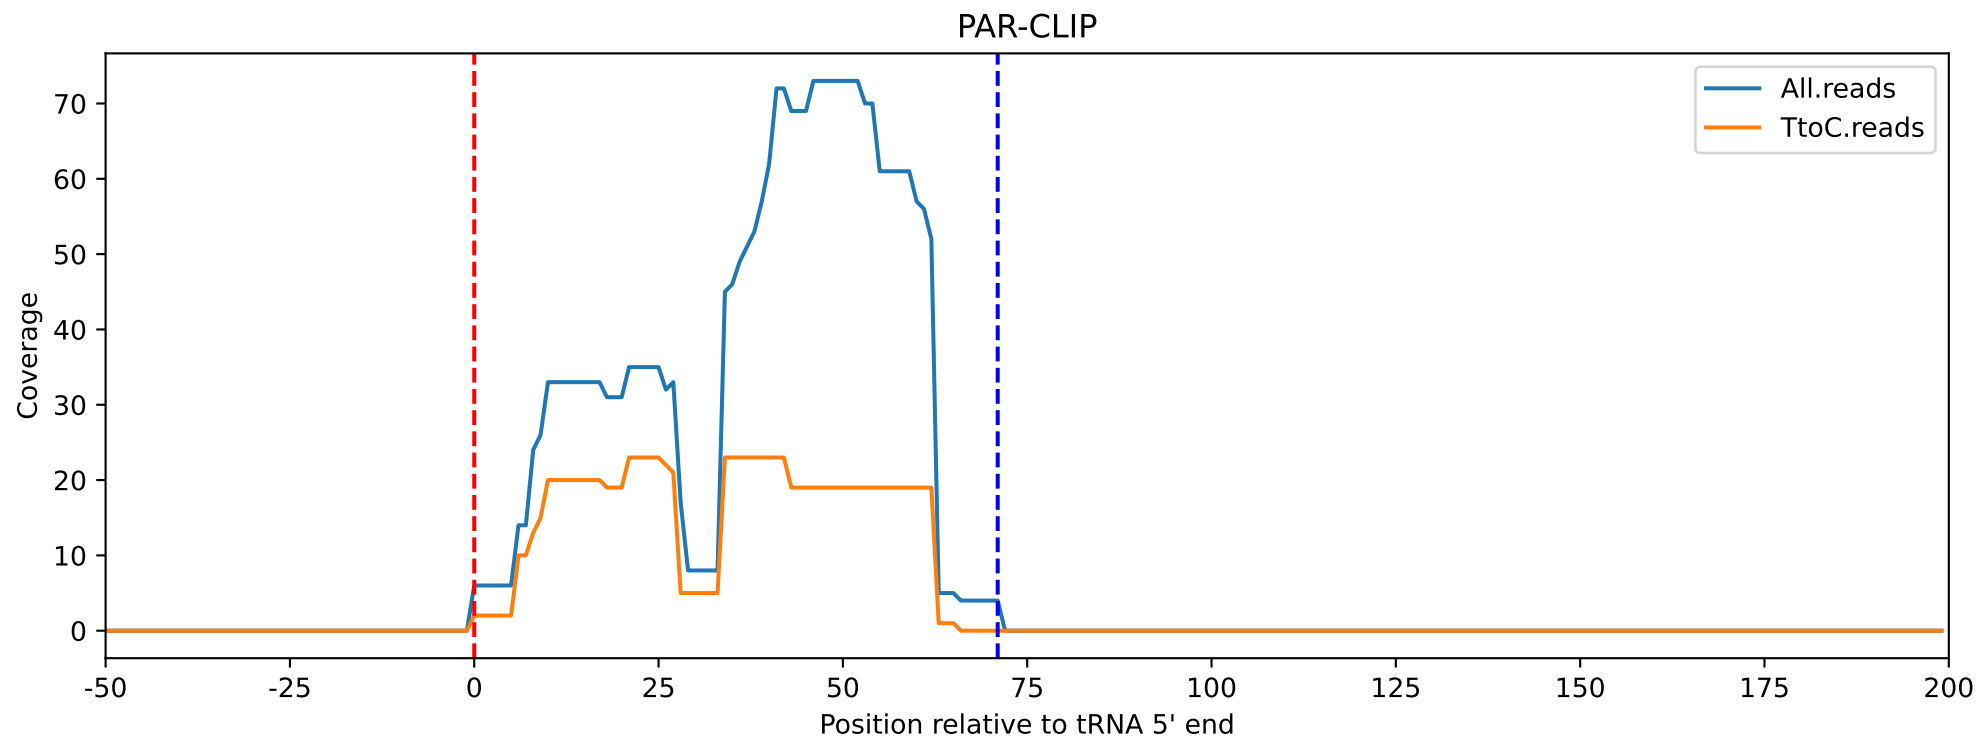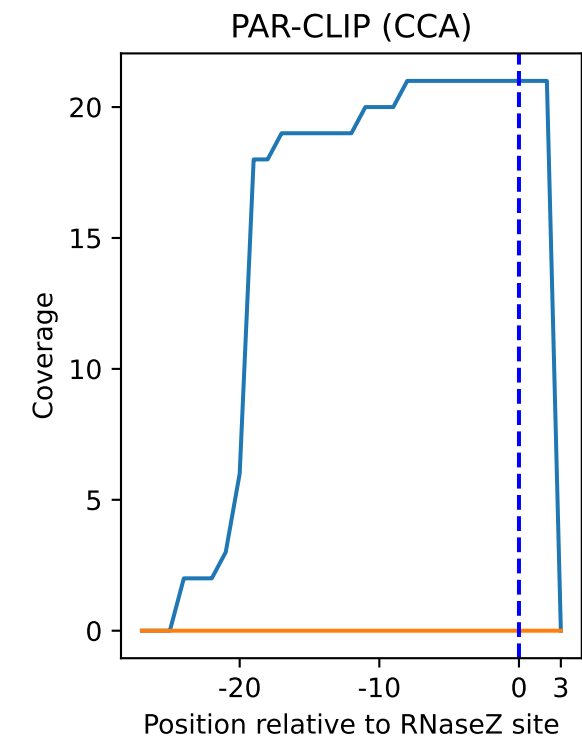

# tRNA-Ser-GCT-2-2

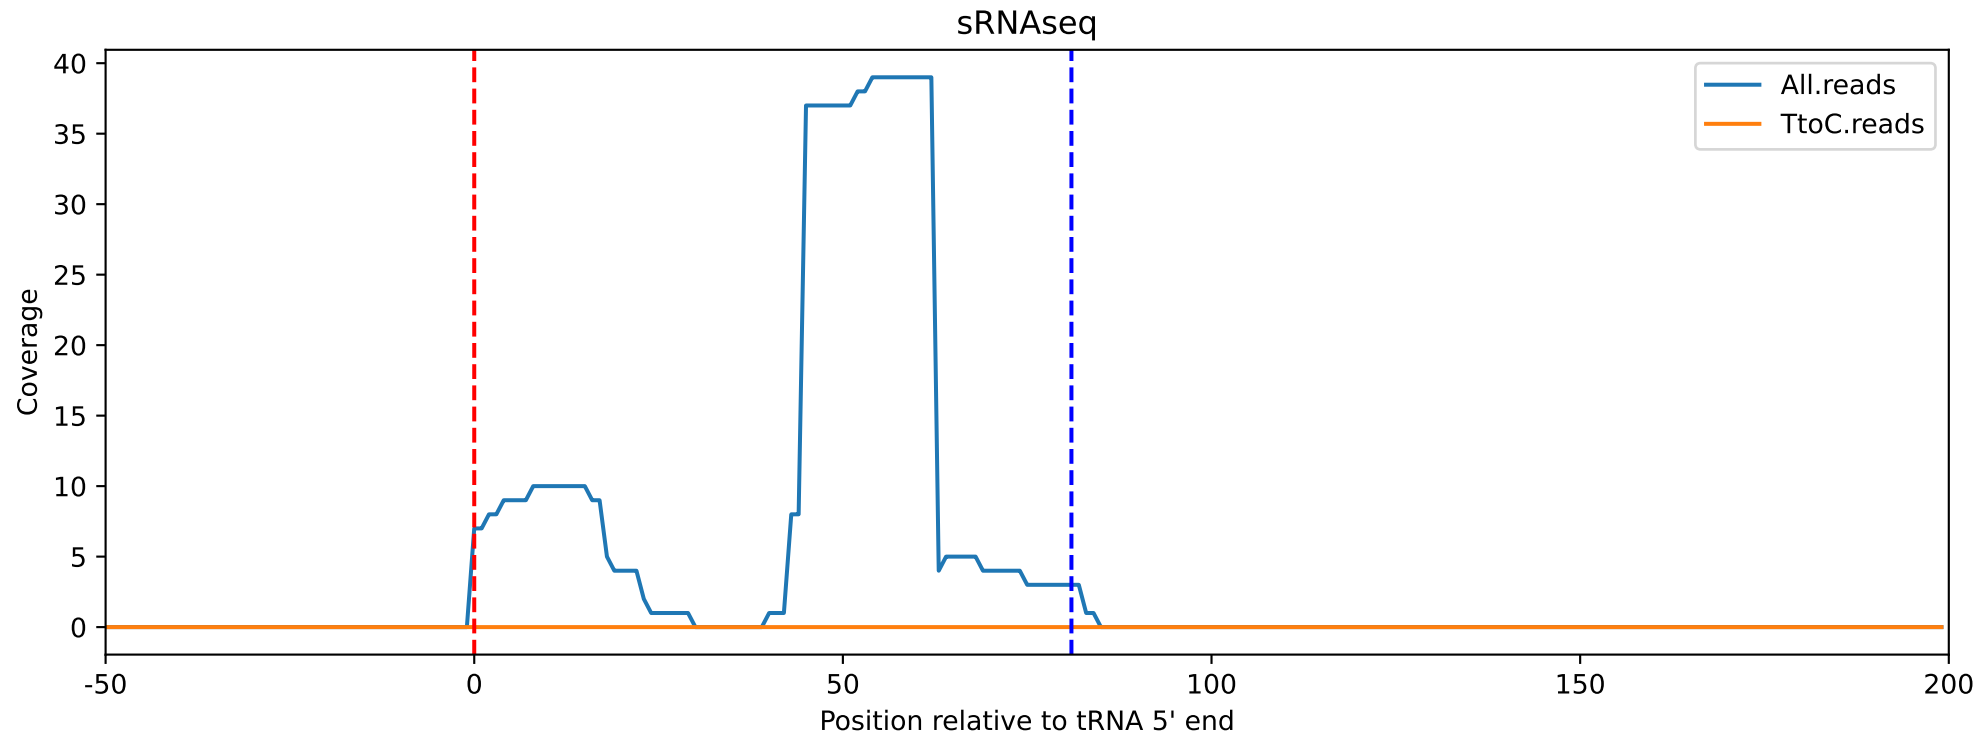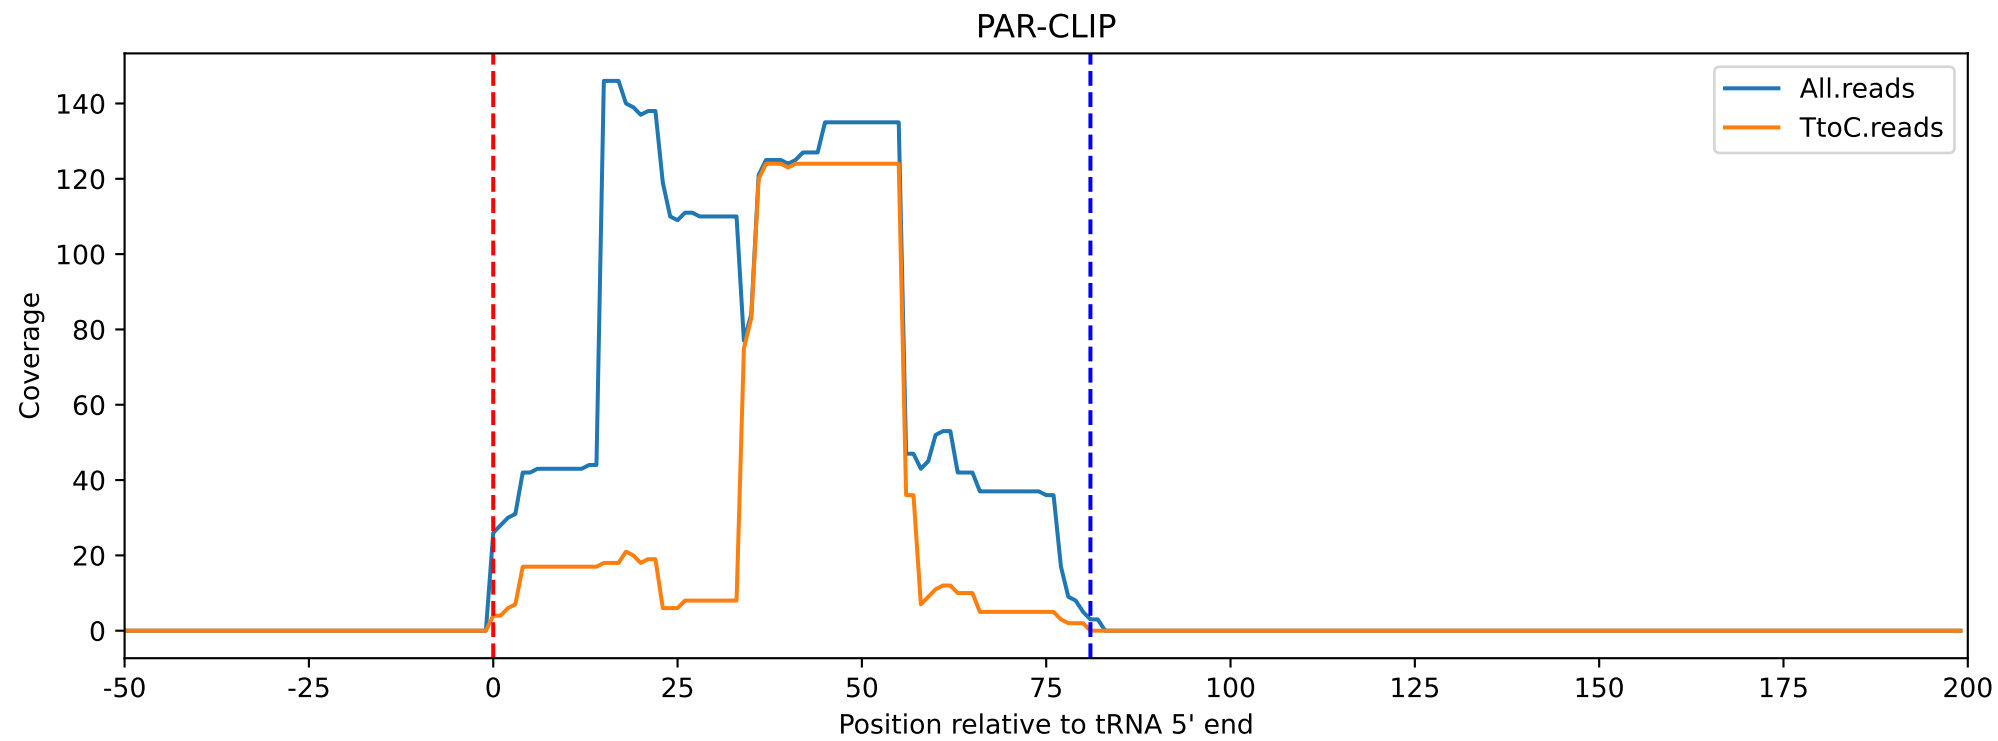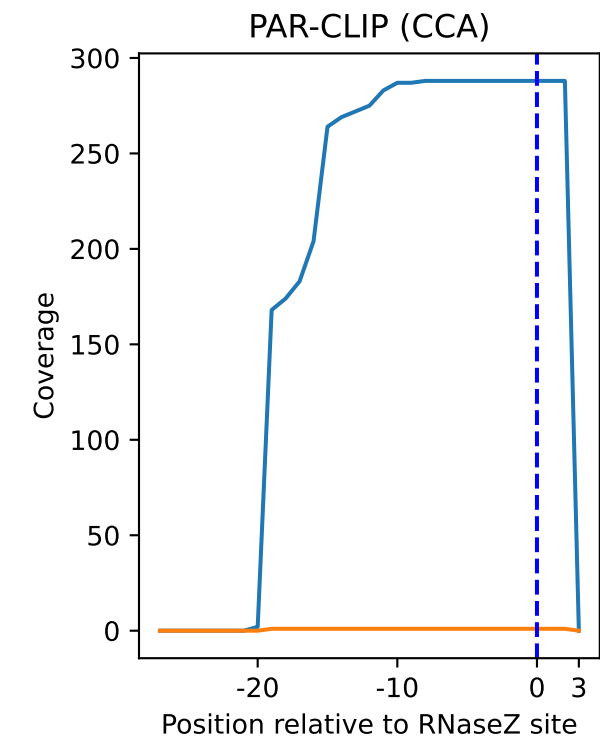

# tRNA-Thr-AGT-1-3

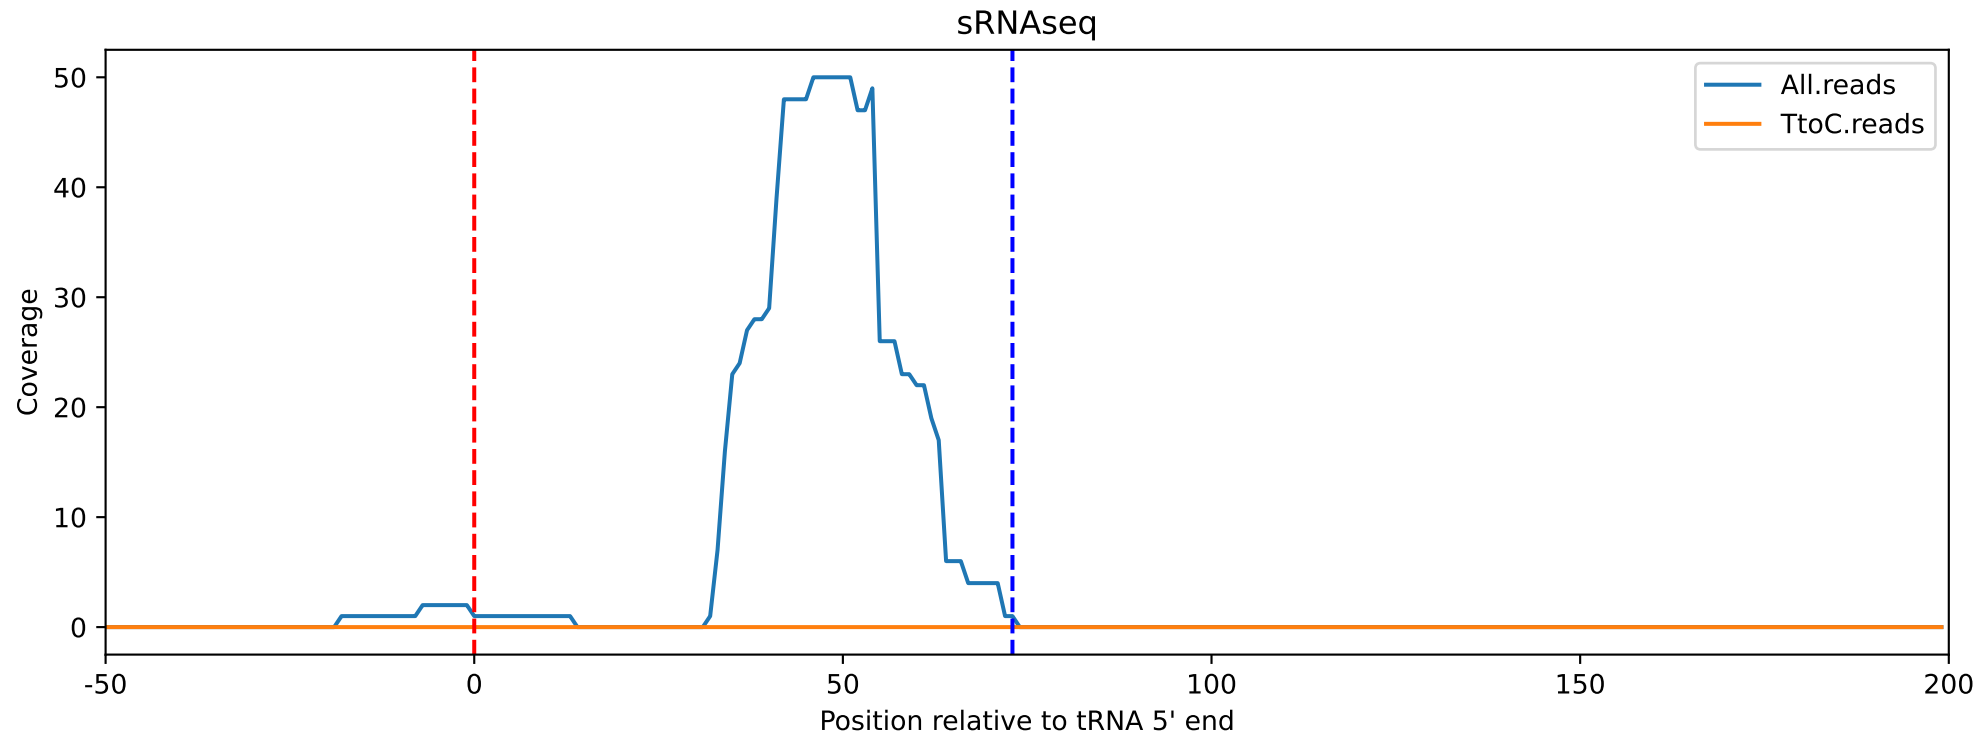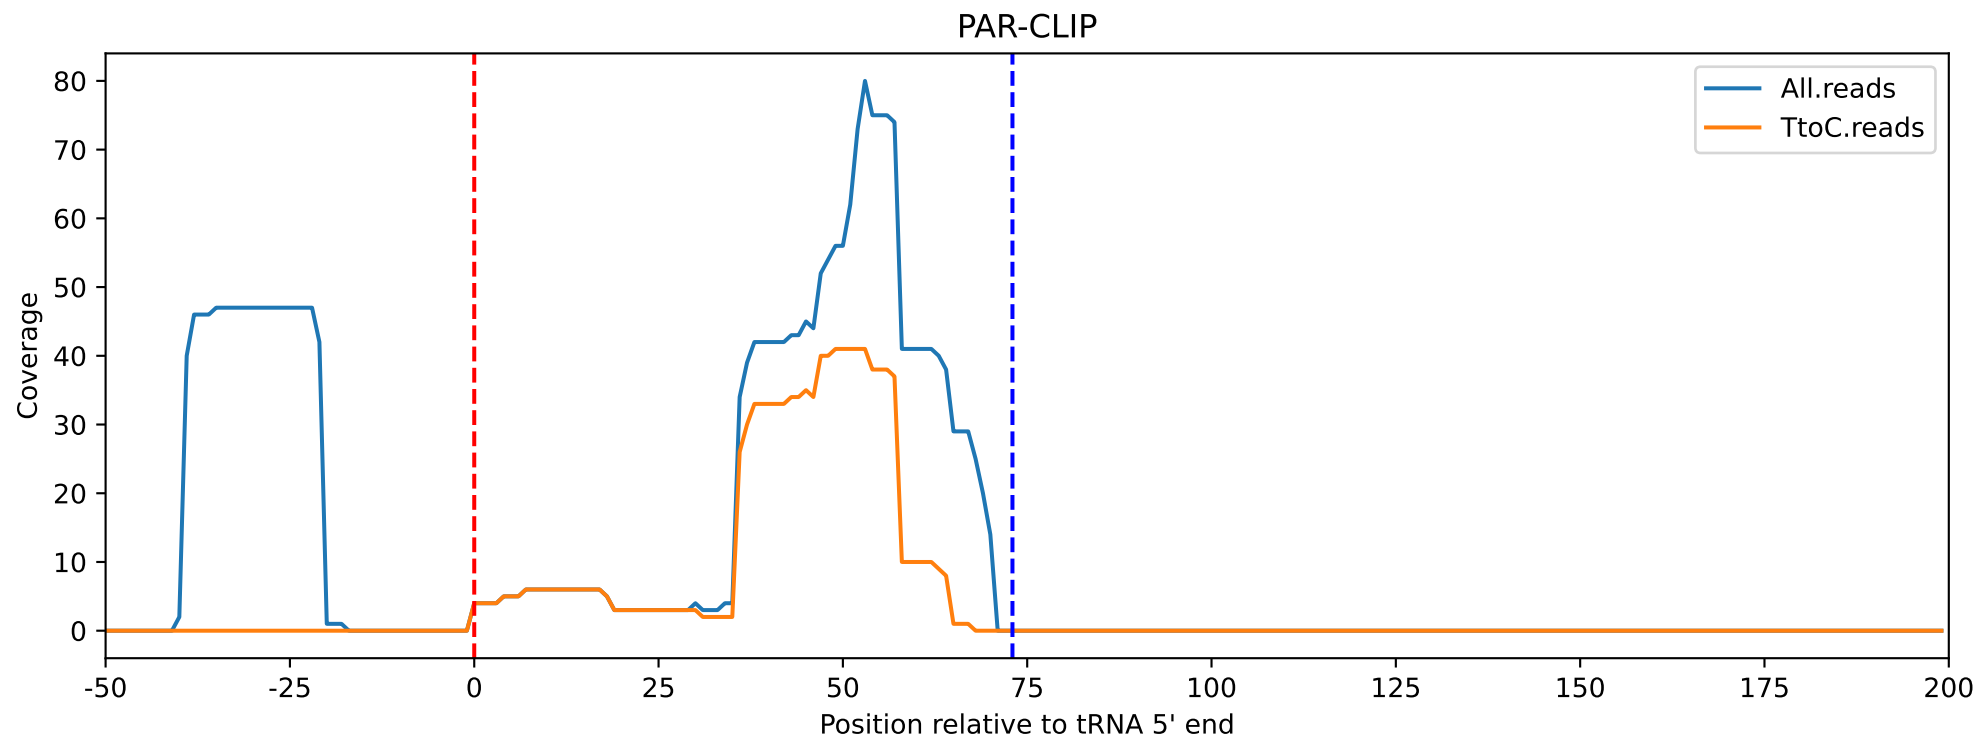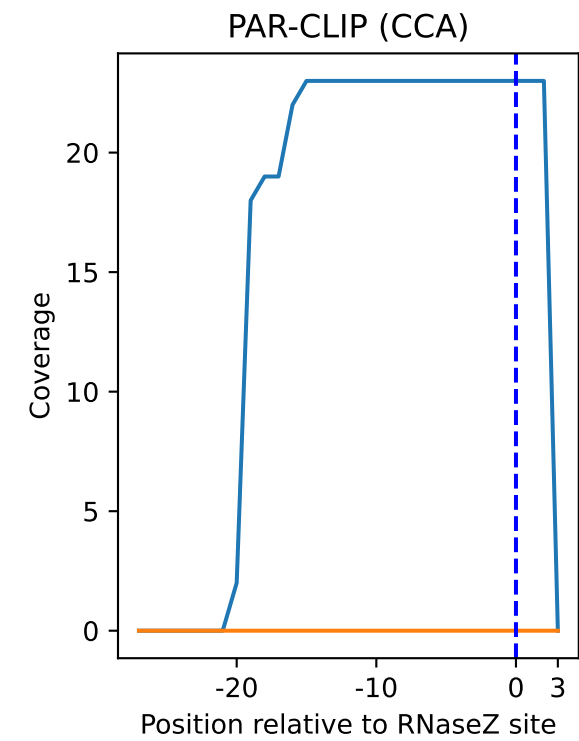

# tRNA-Val-CAC-1-1

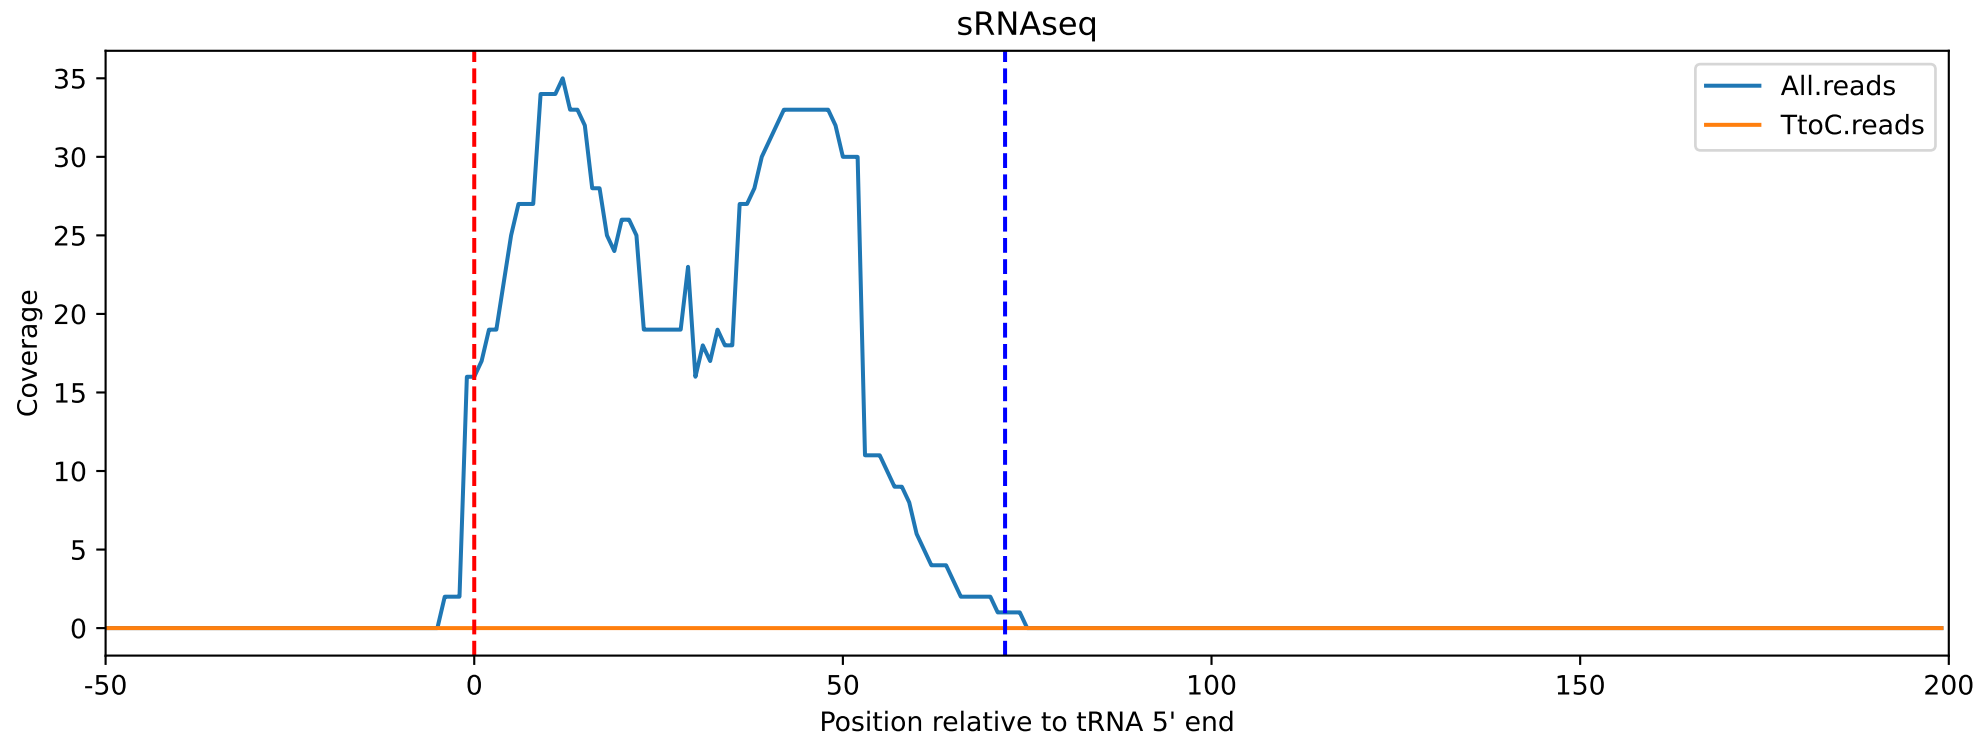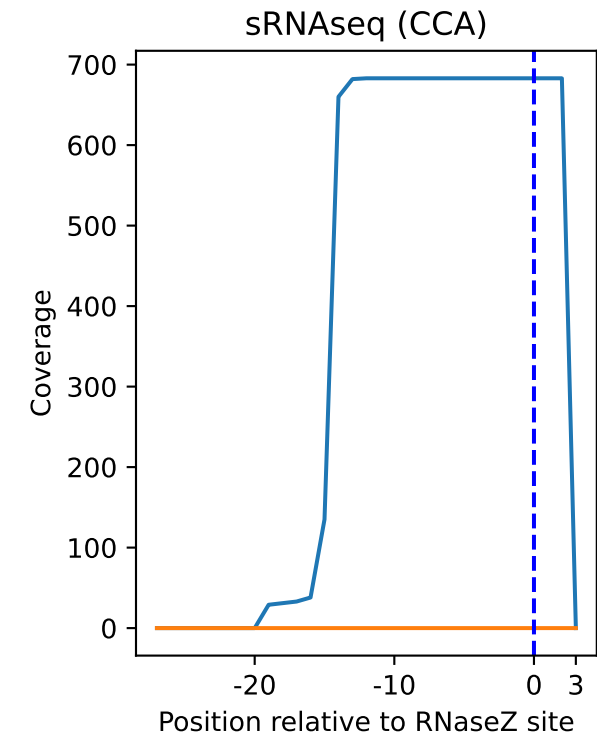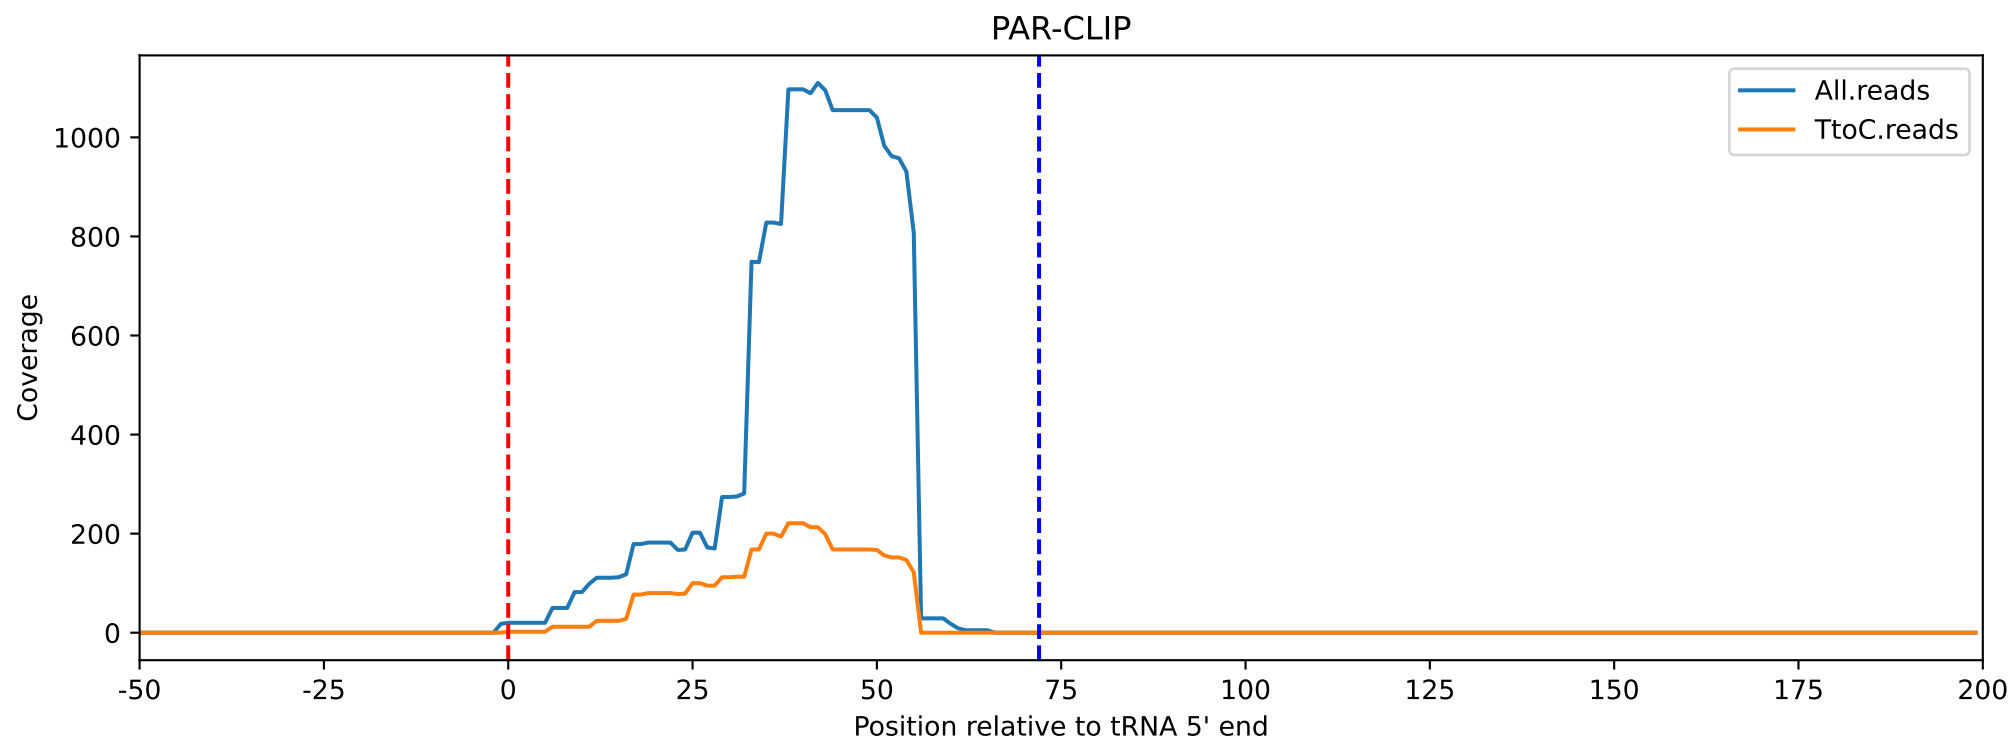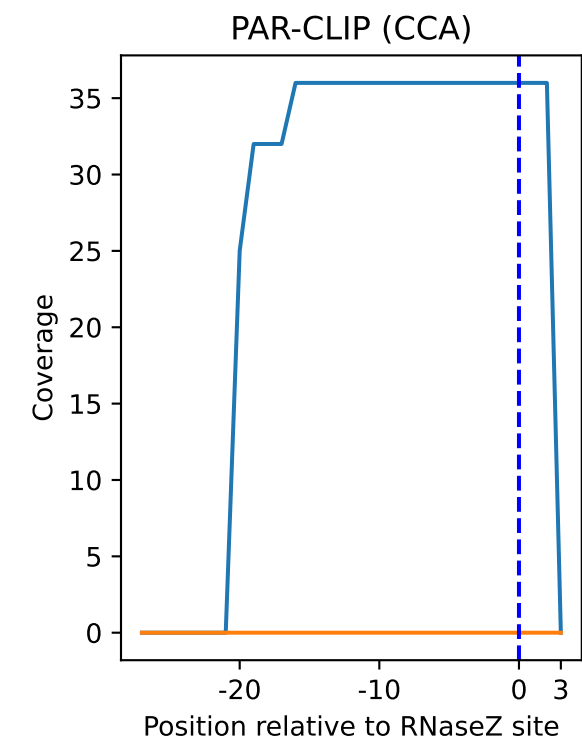



# tRNA-Ala-AGC-2-2

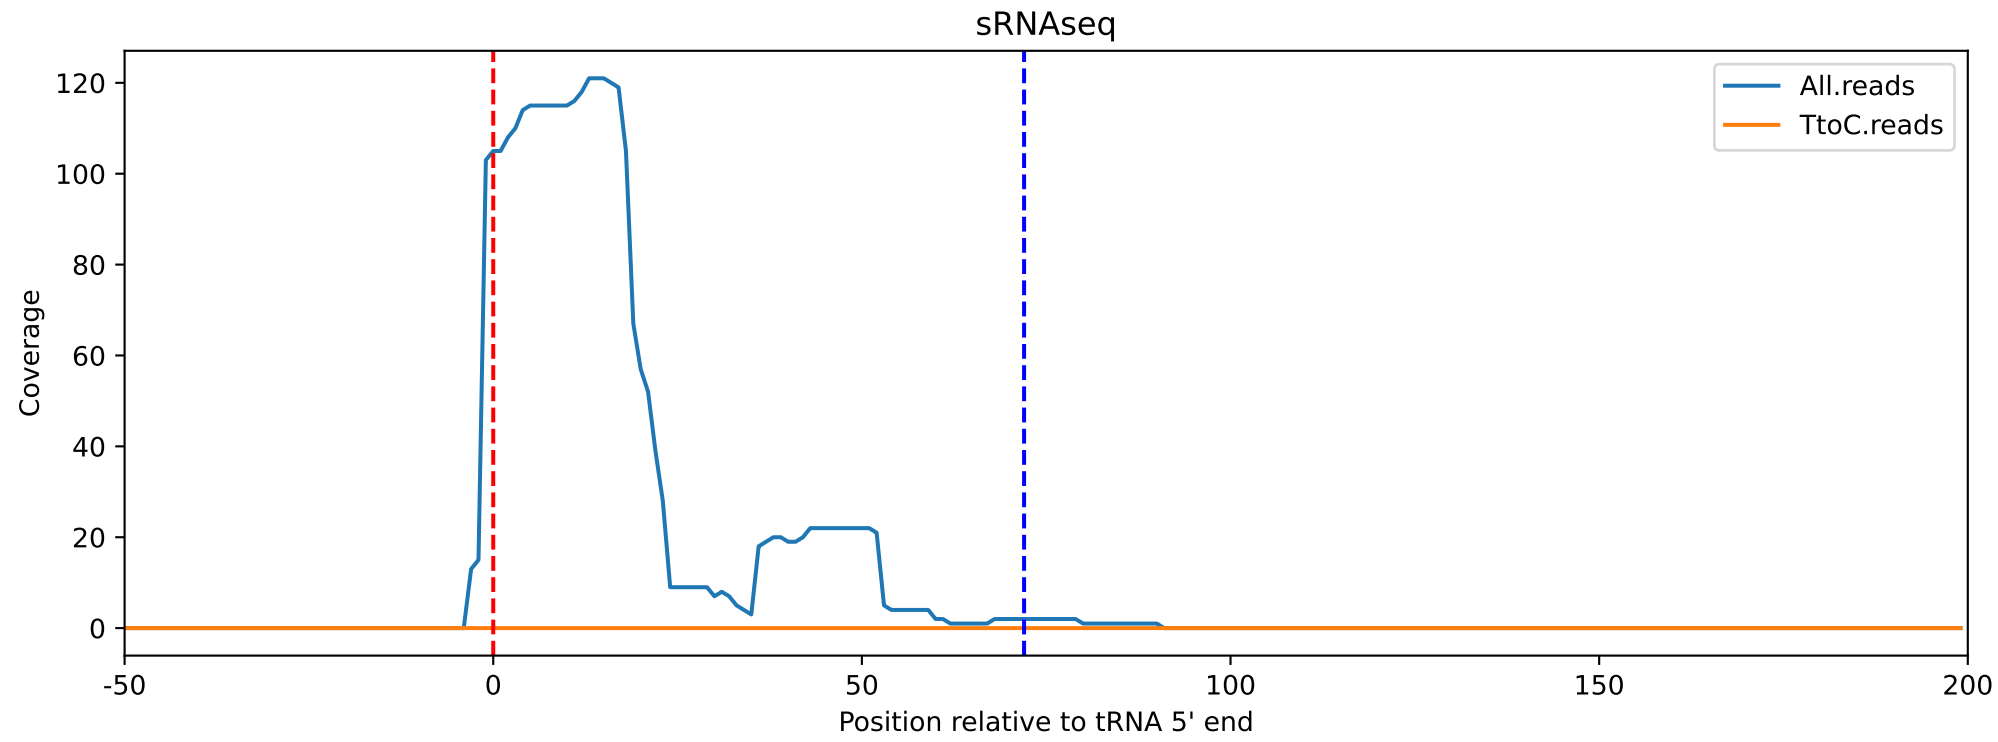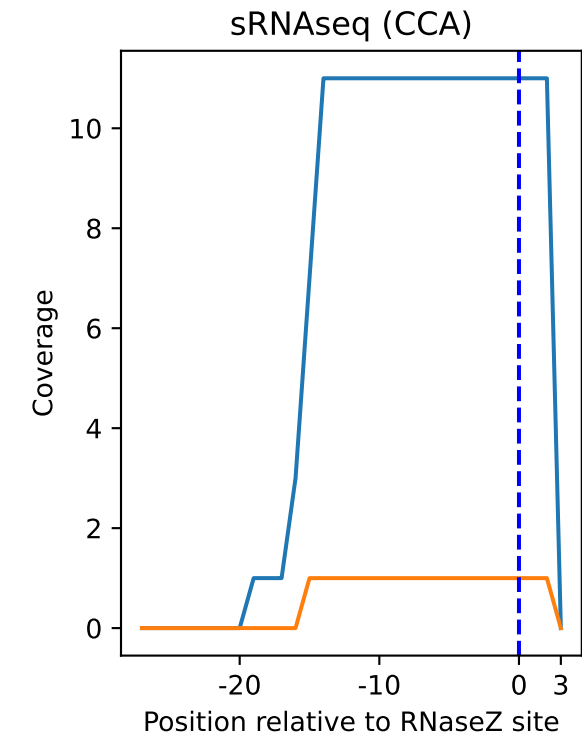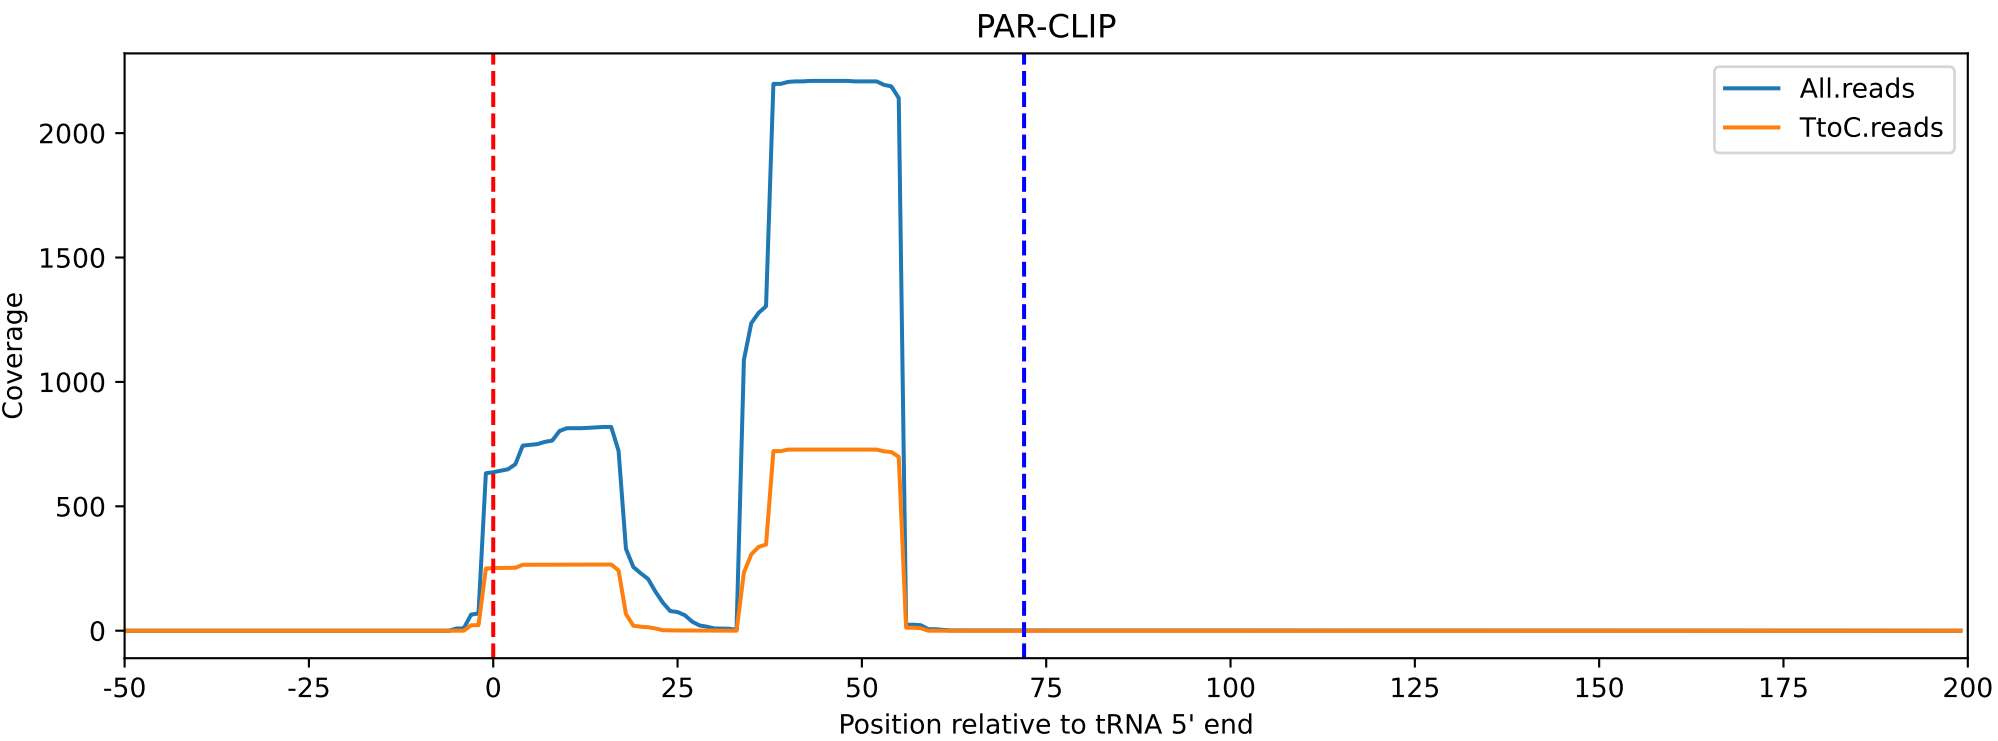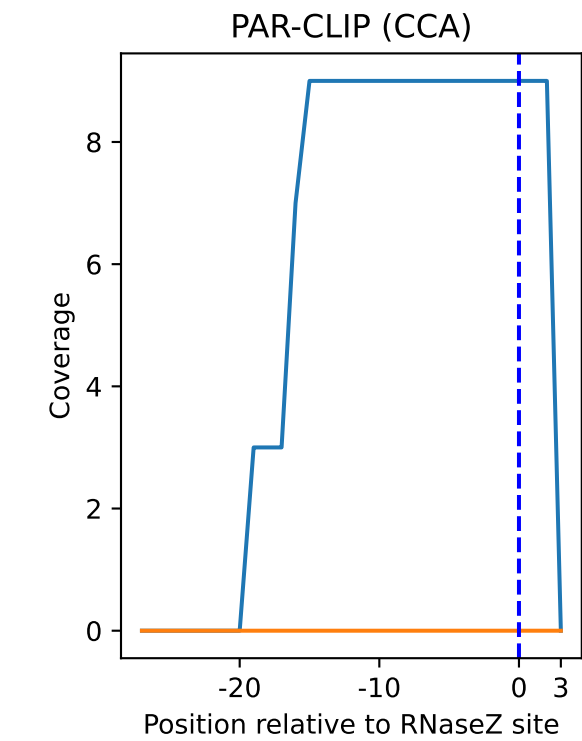

# tRNA-Ala-AGC-2-9

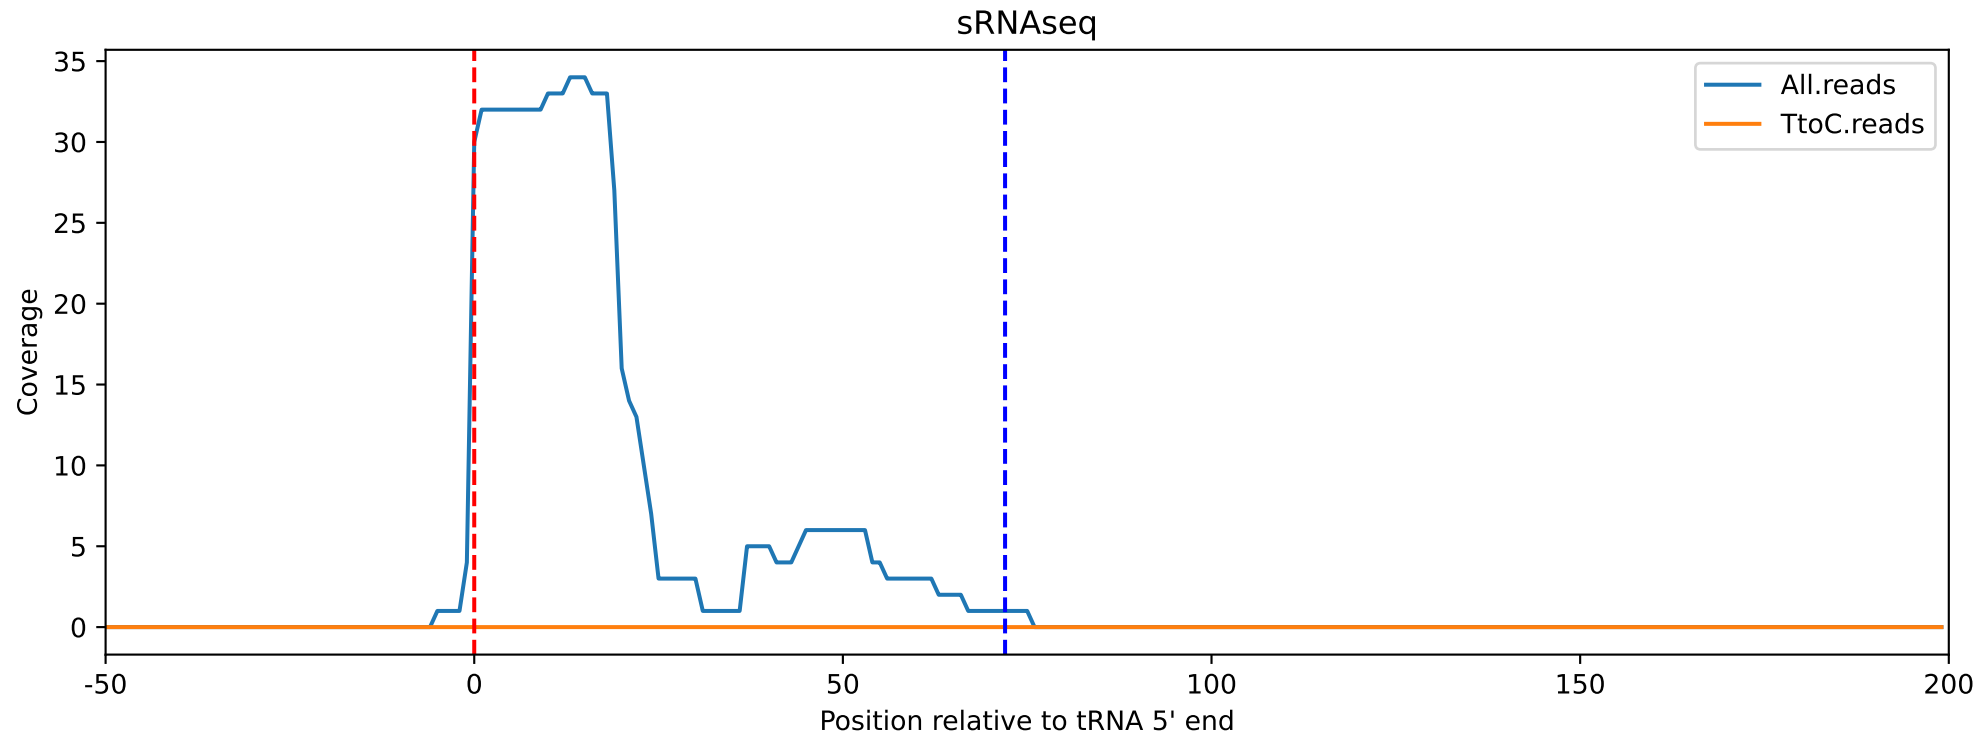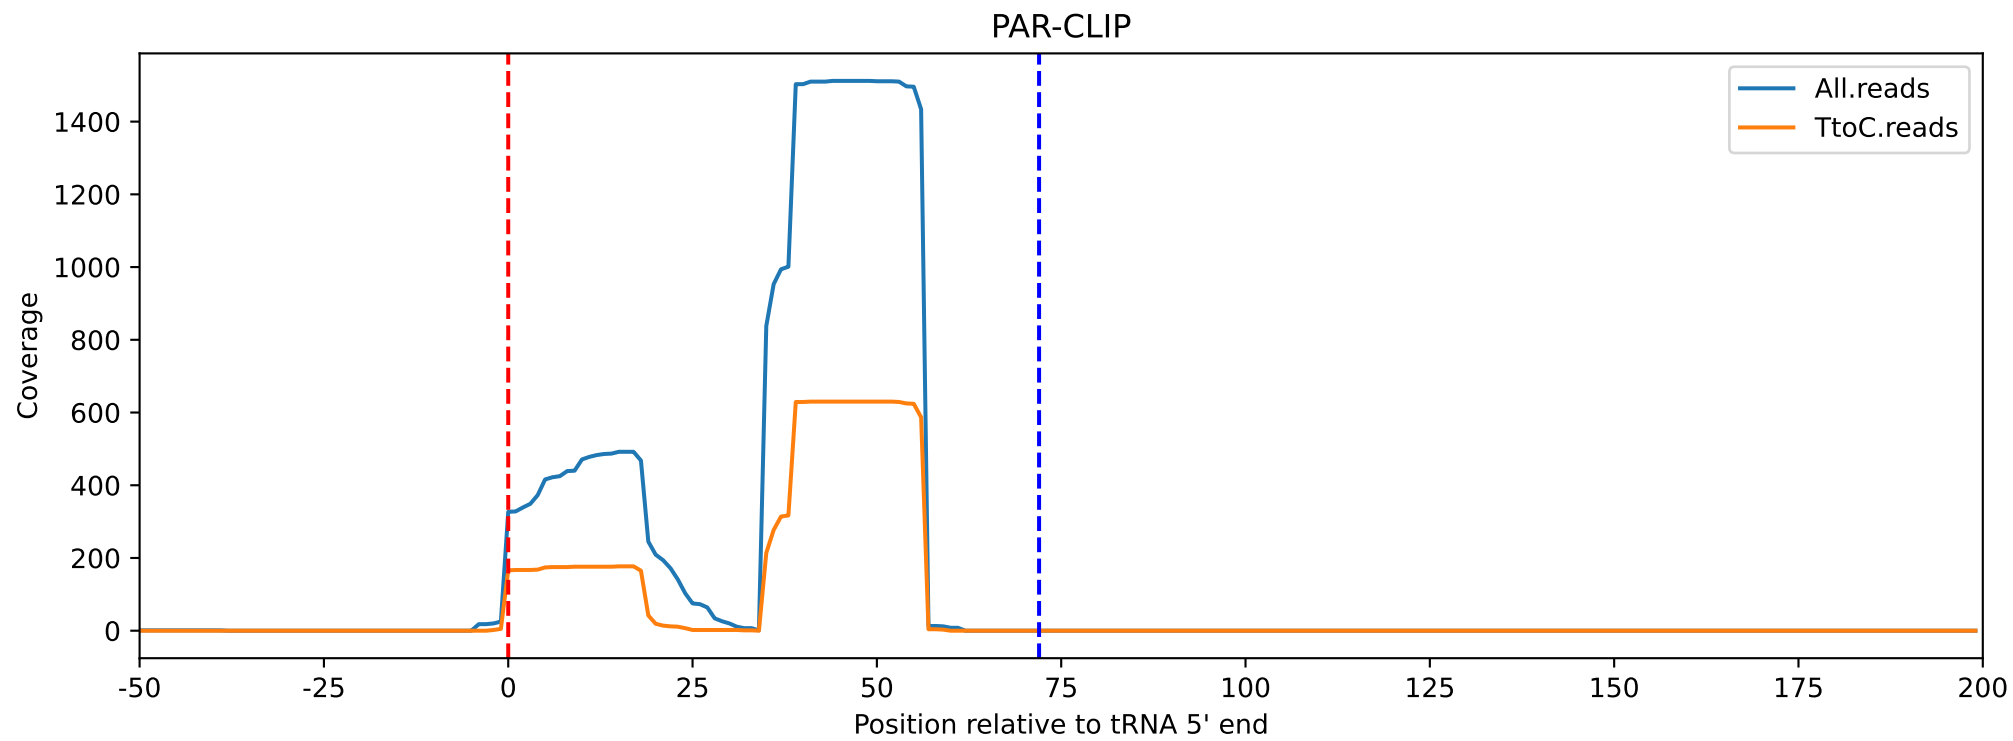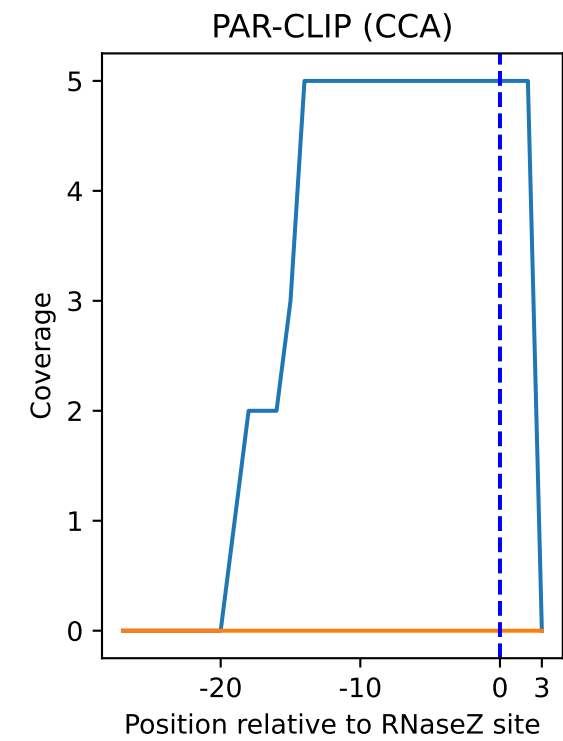

# tRNA-Leu-TAG-1-1

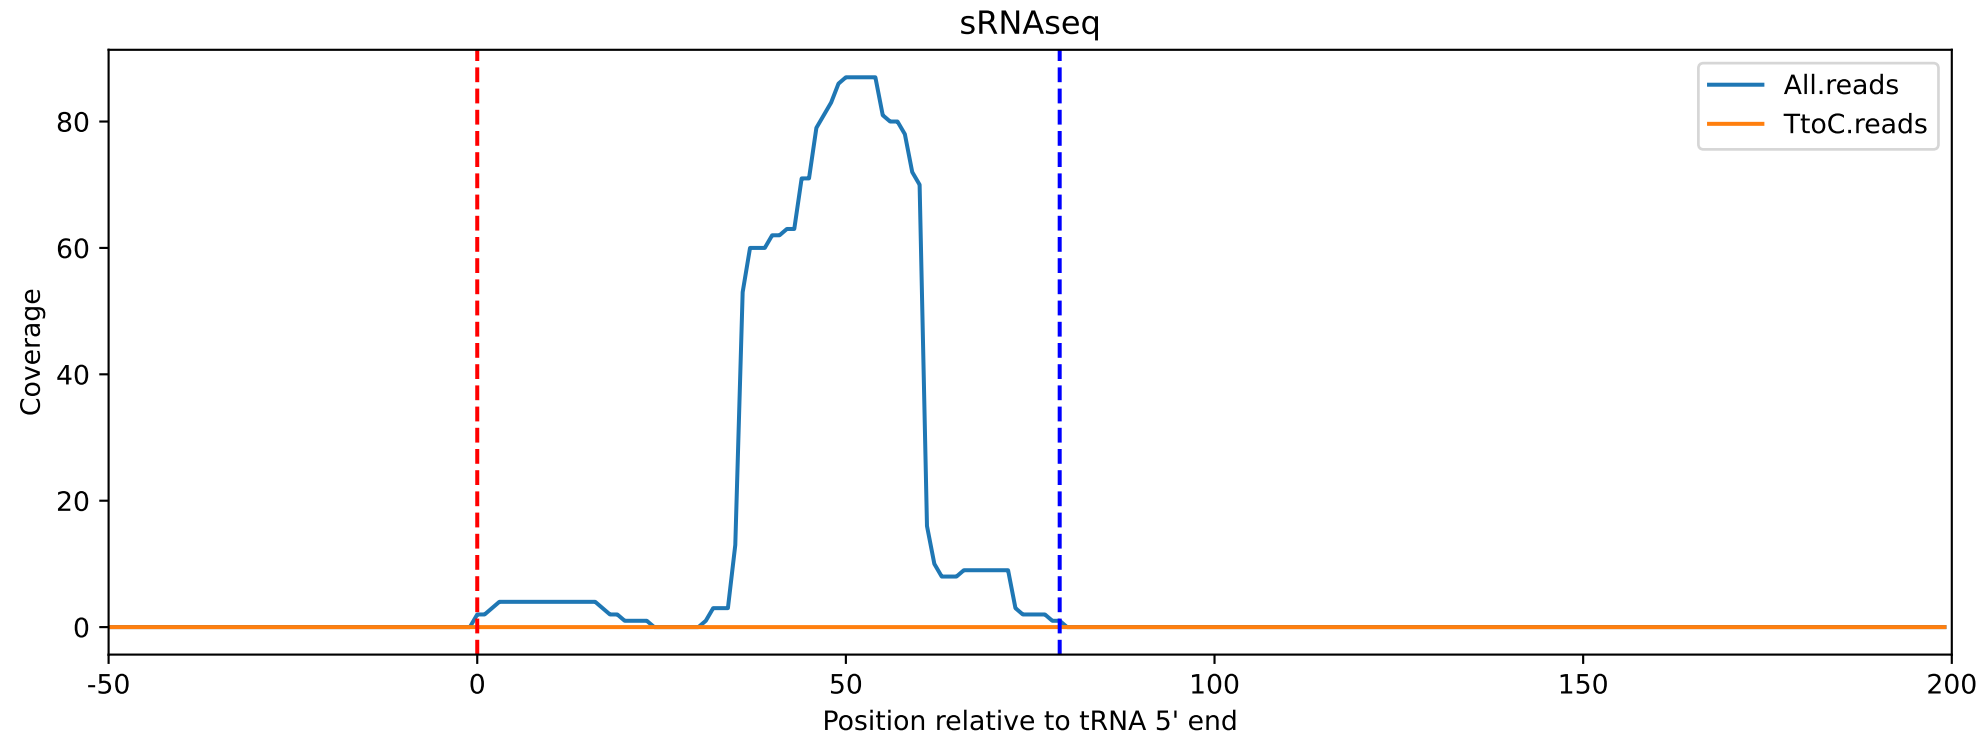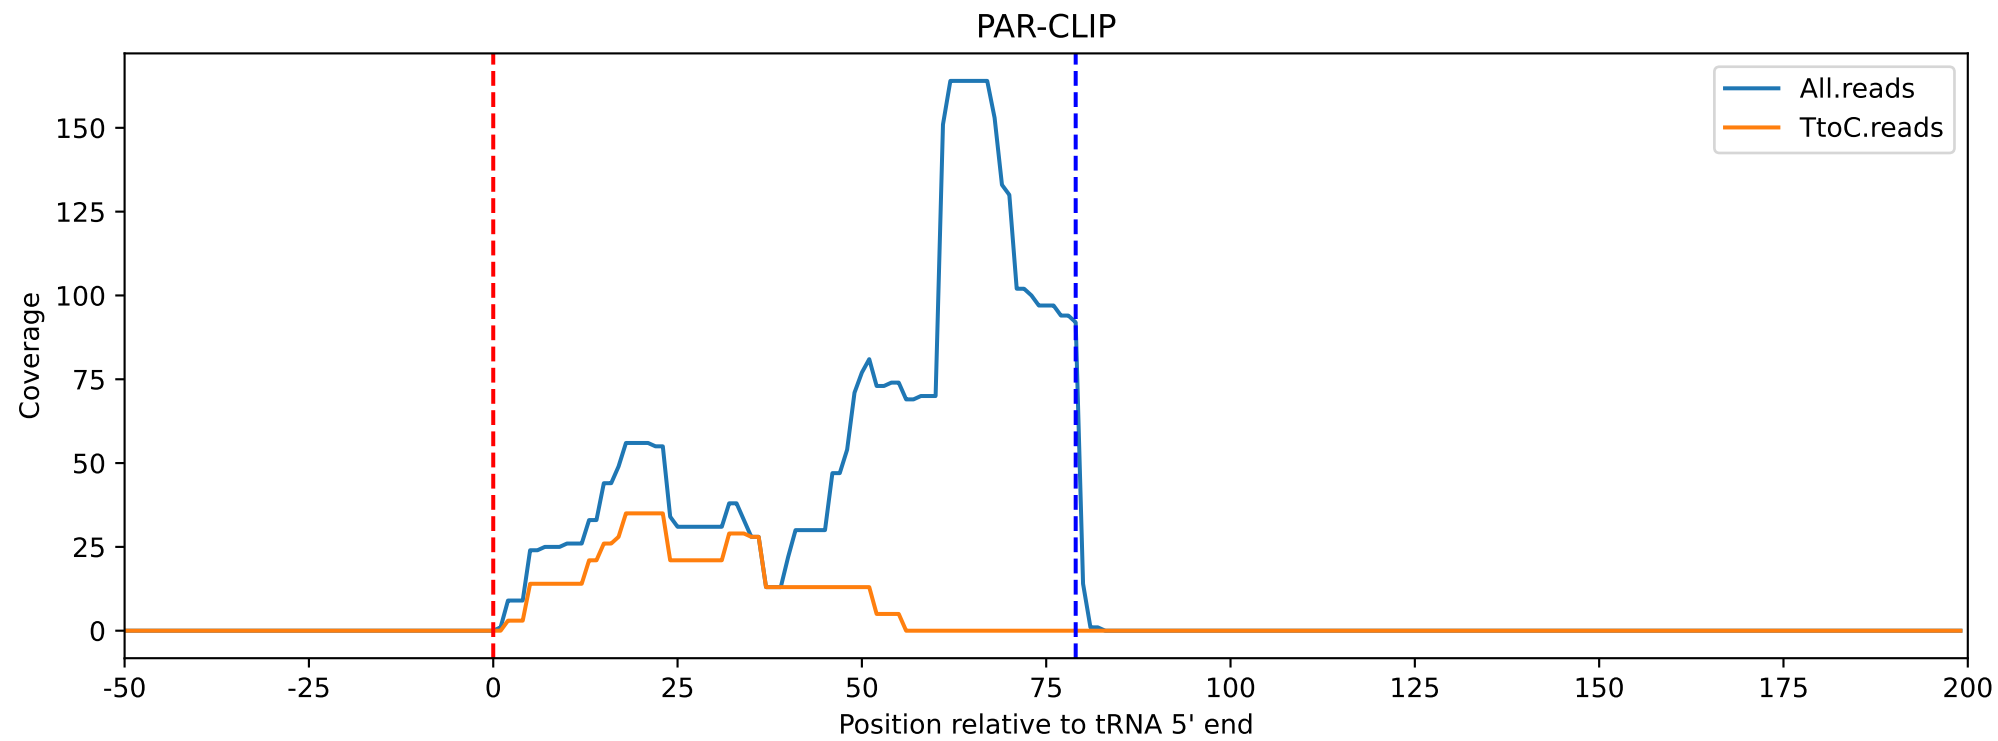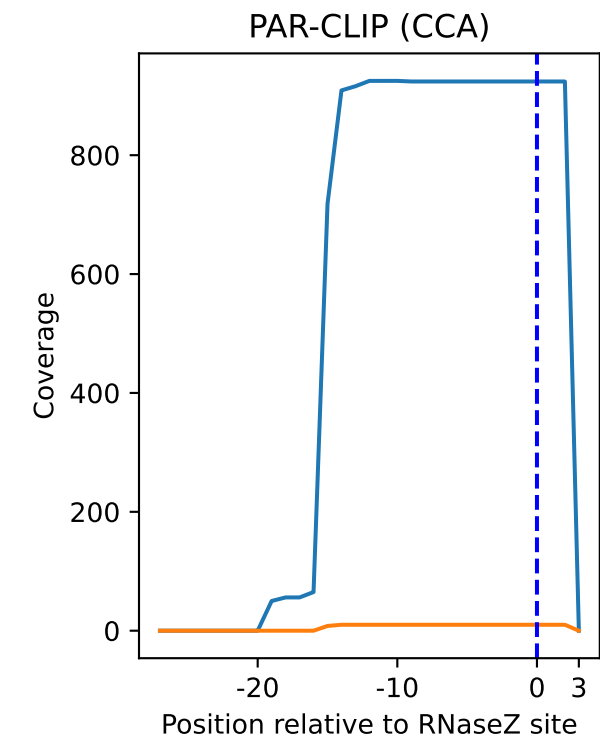

# tRNA-Pro-CGG-3-1

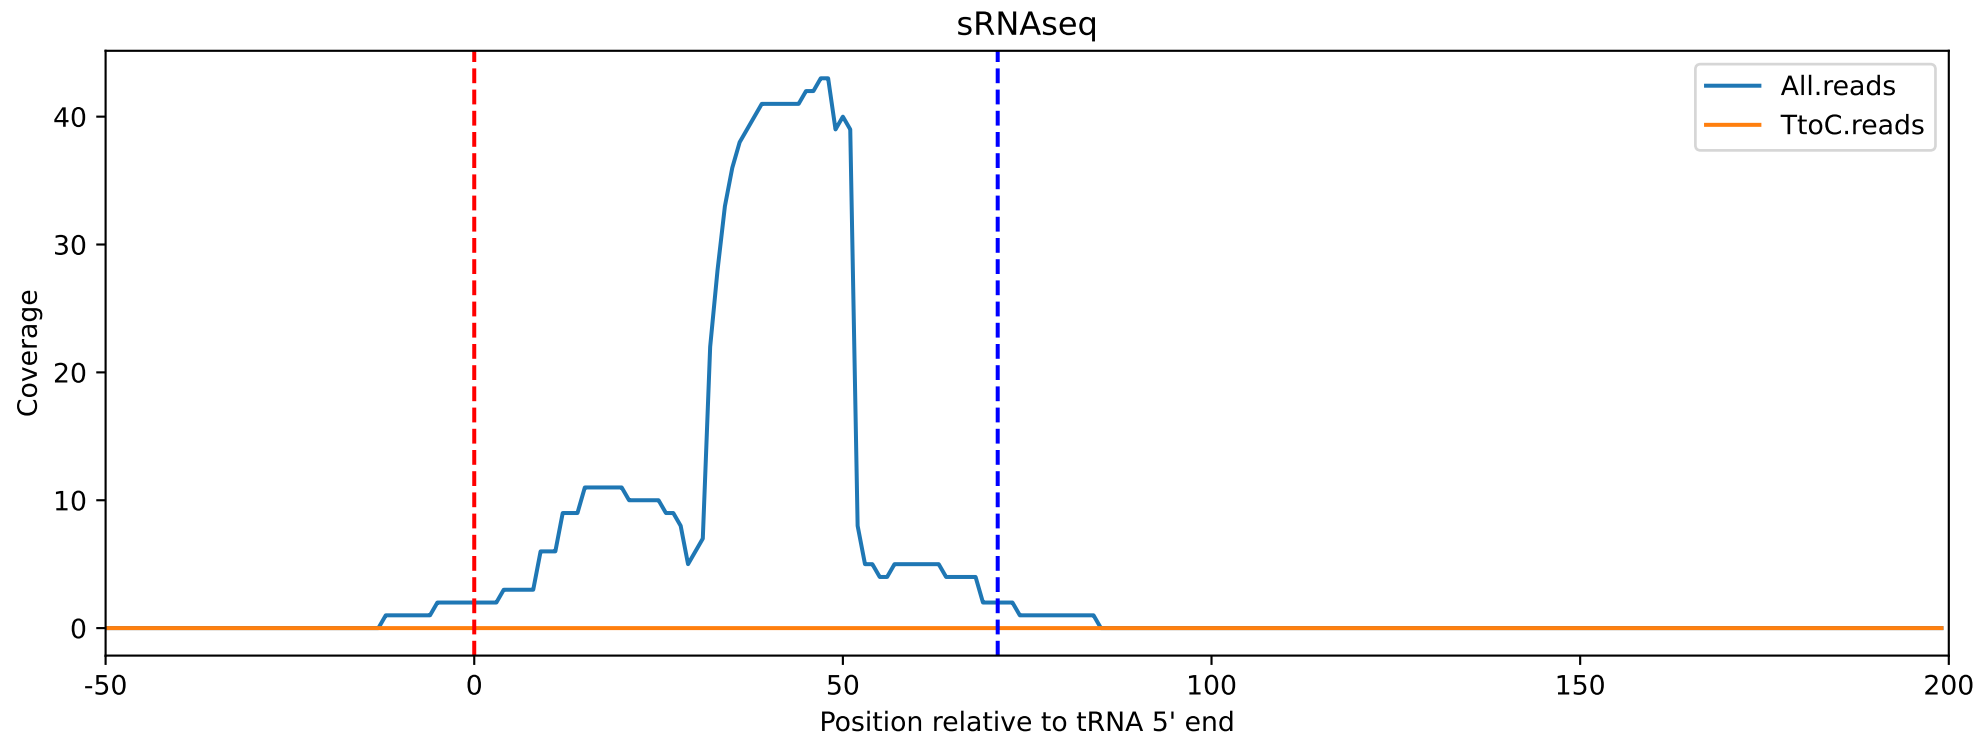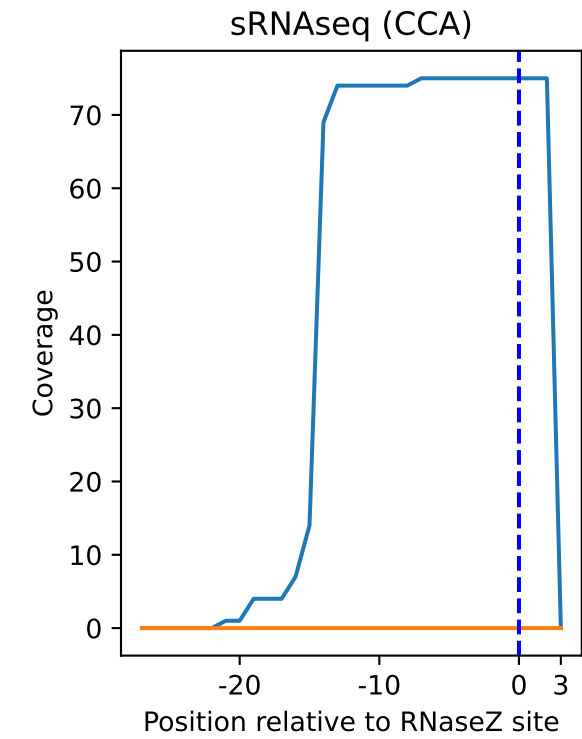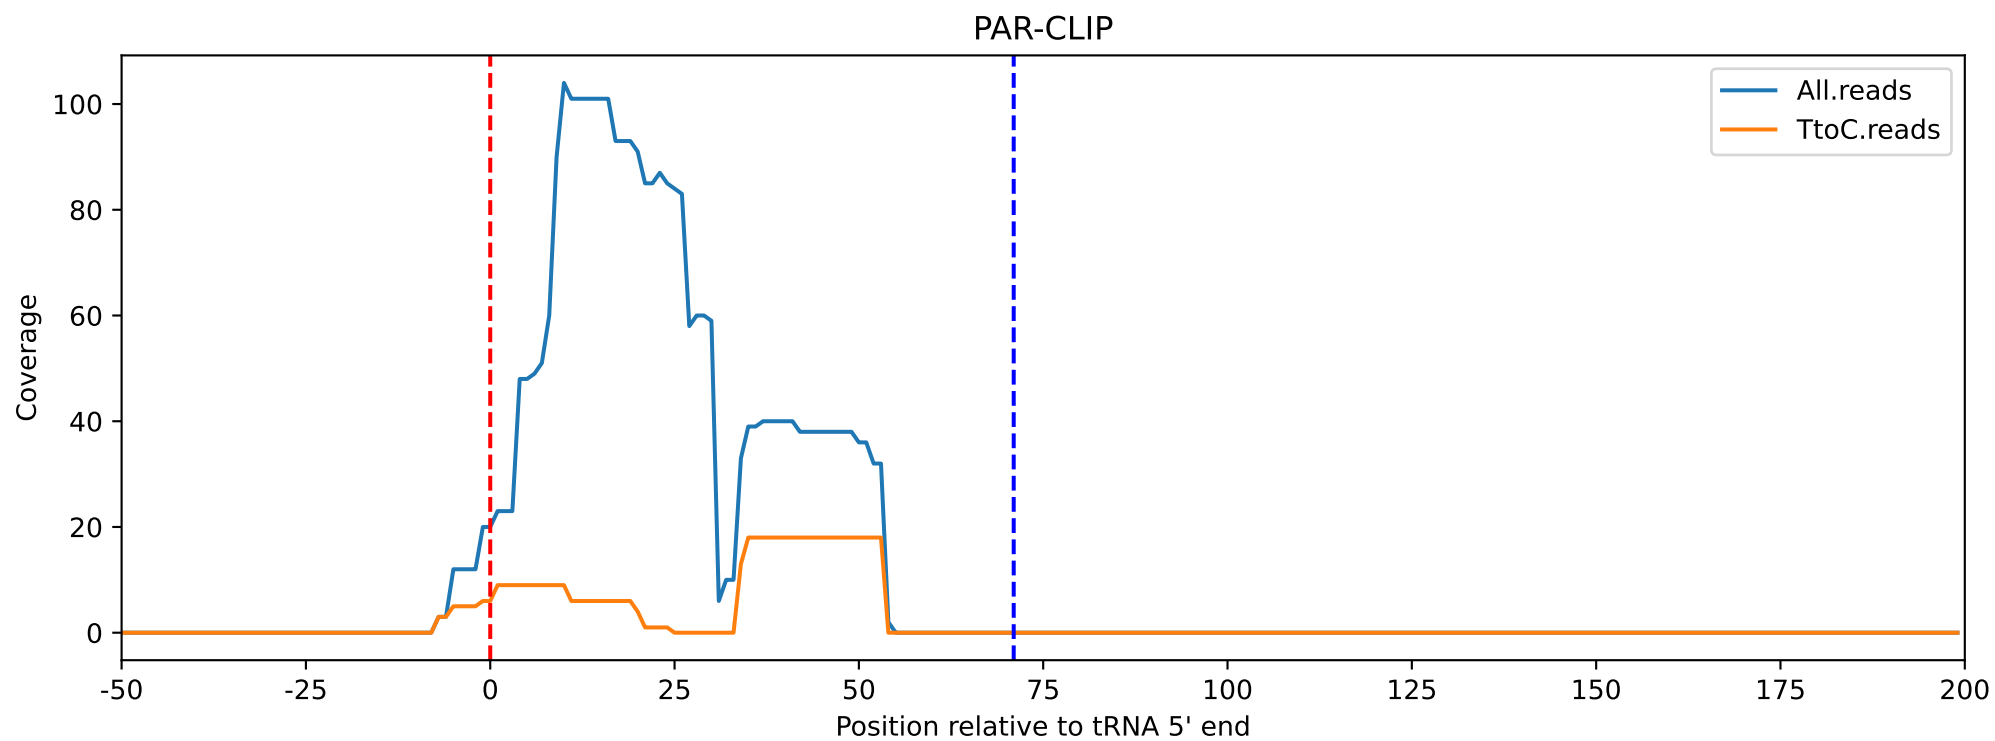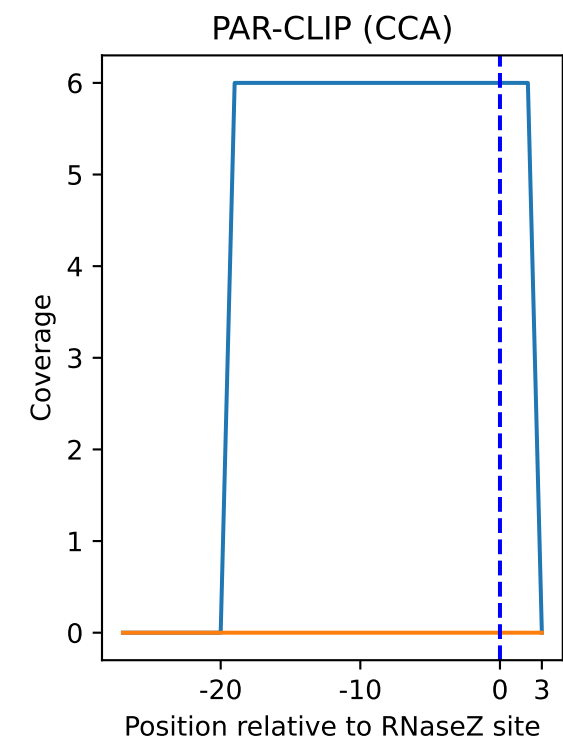

# tRNA-Glu-CTC-6-1

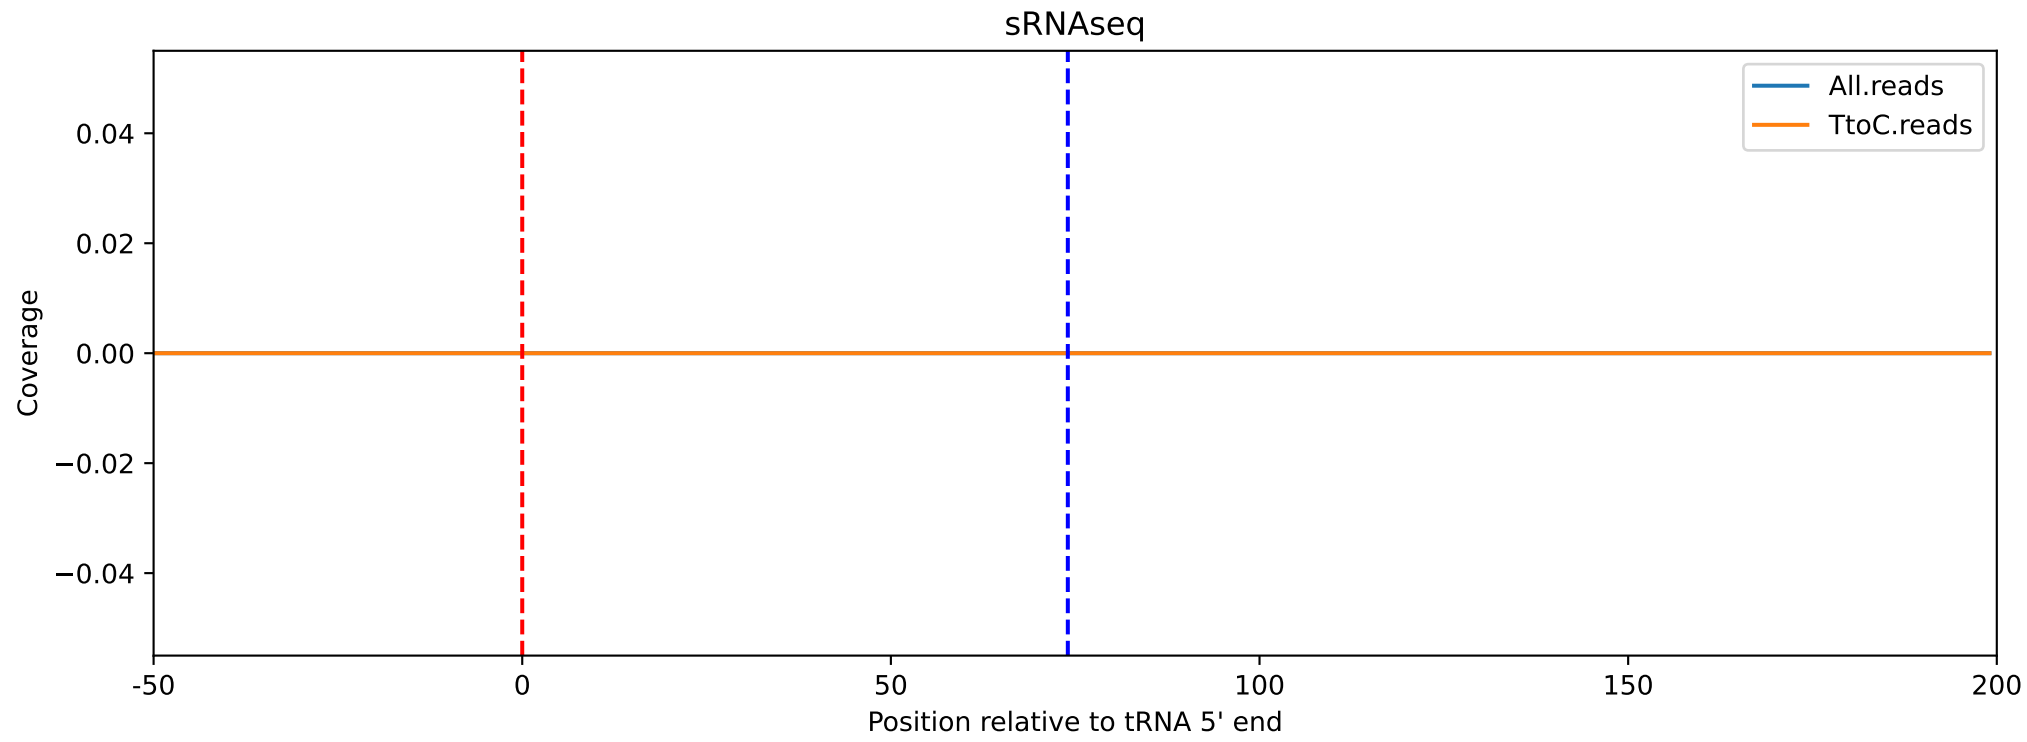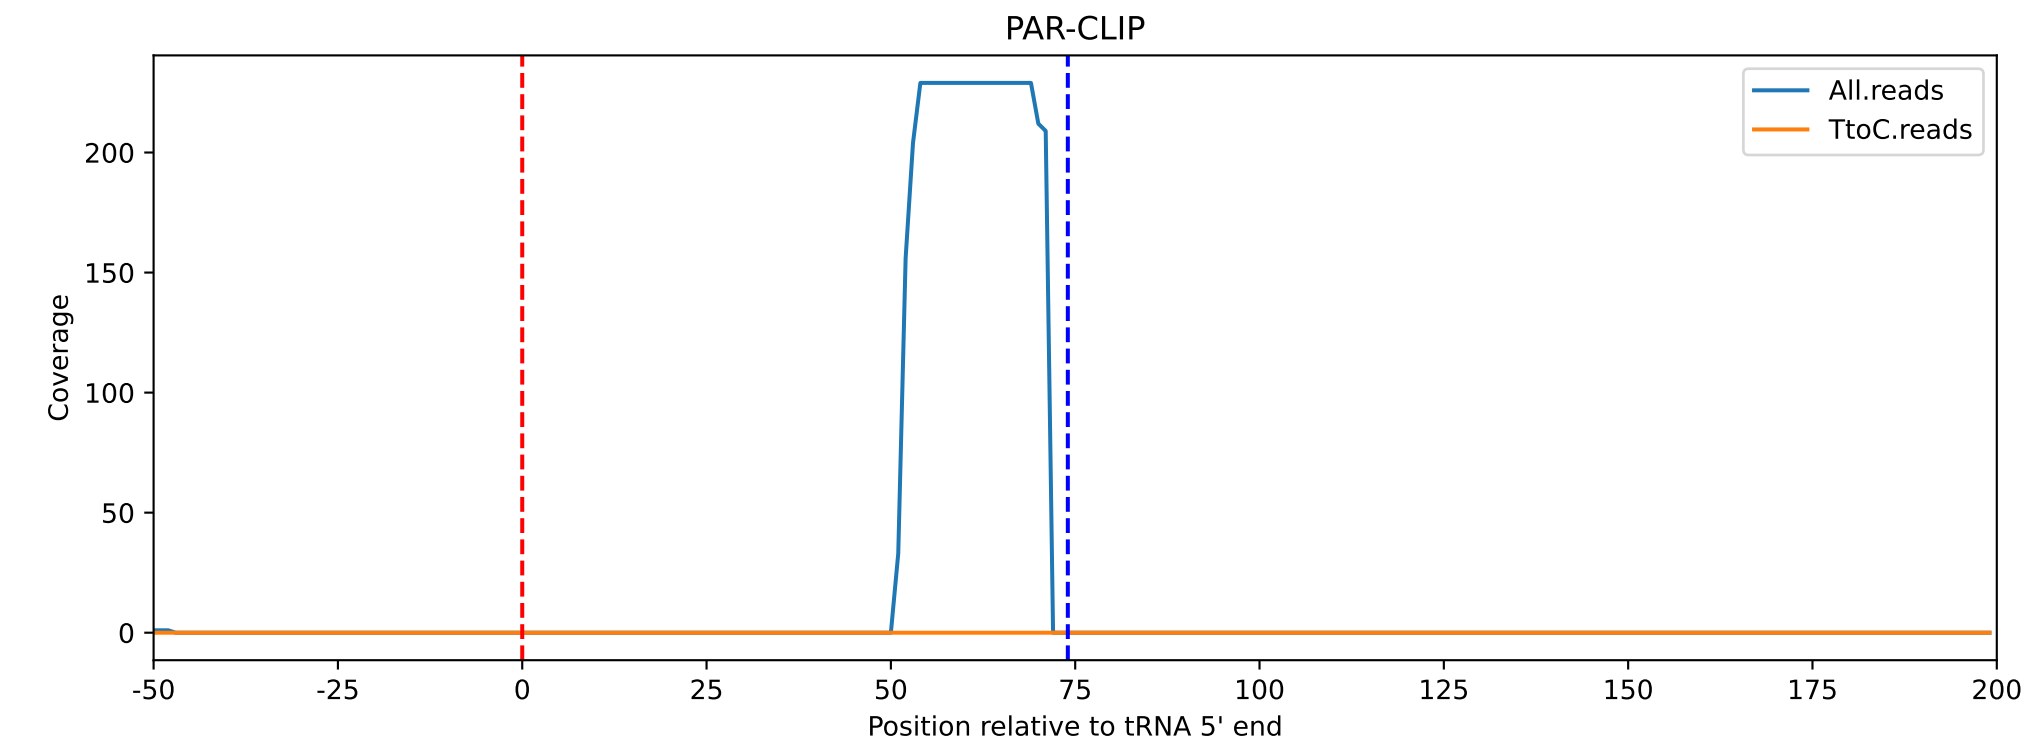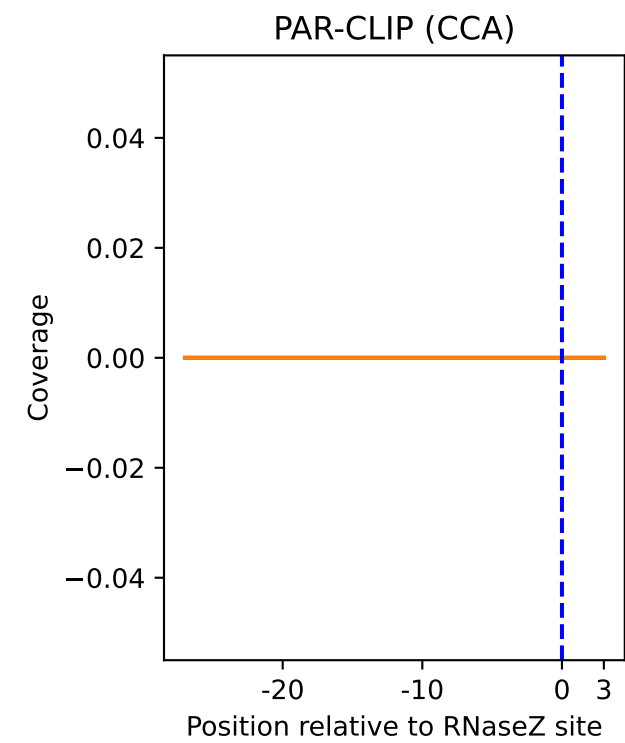

# tRNA-Arg-TCG-2-1

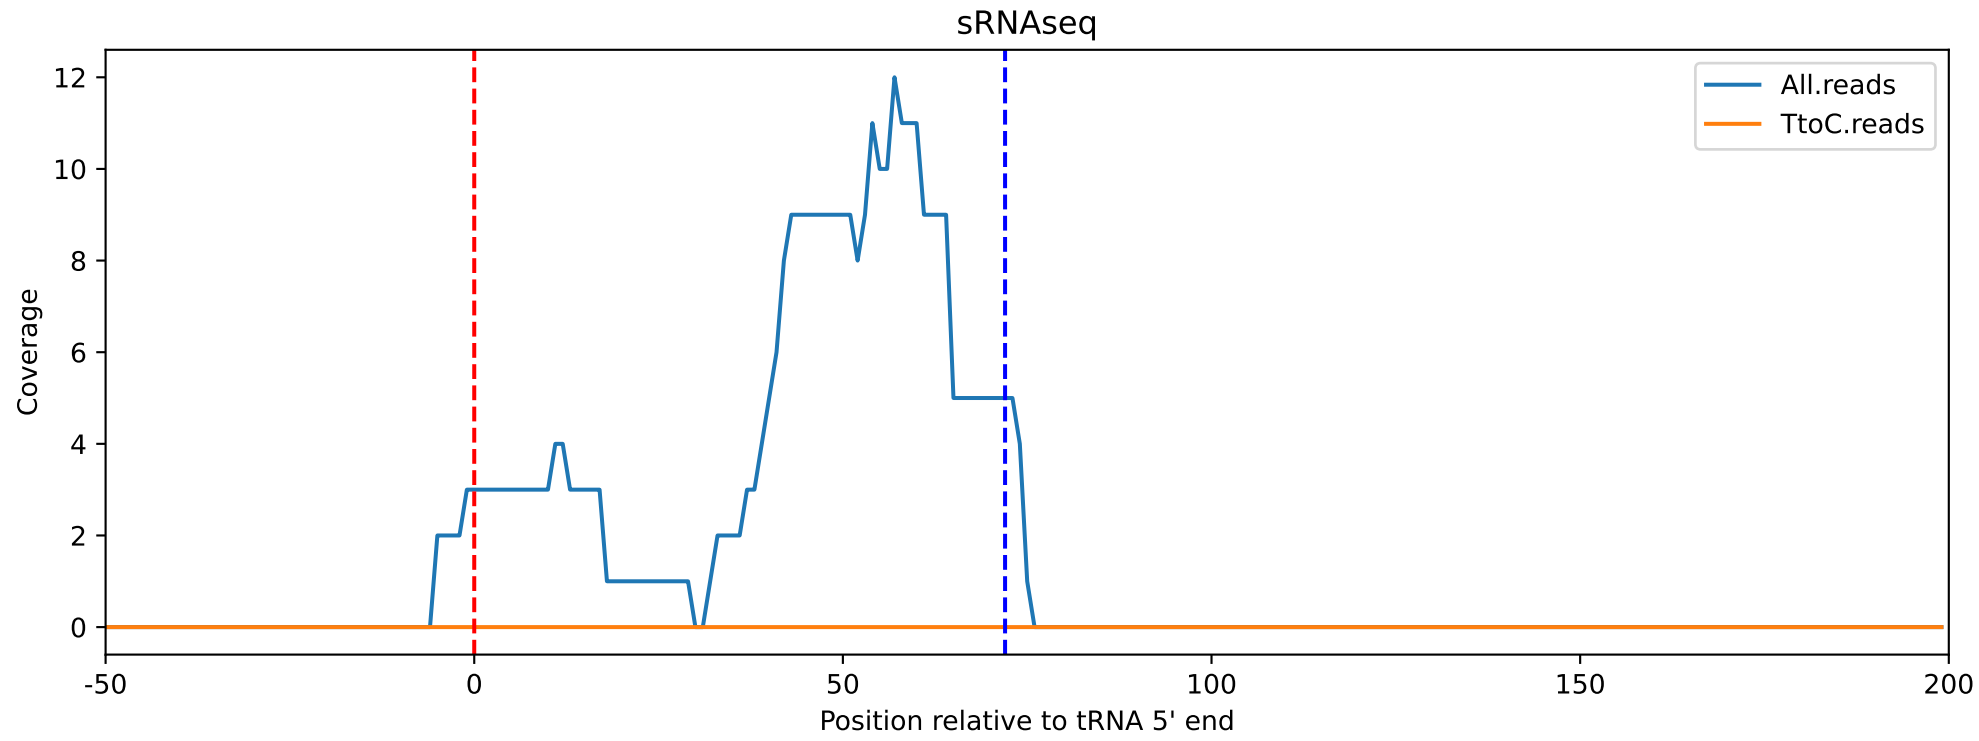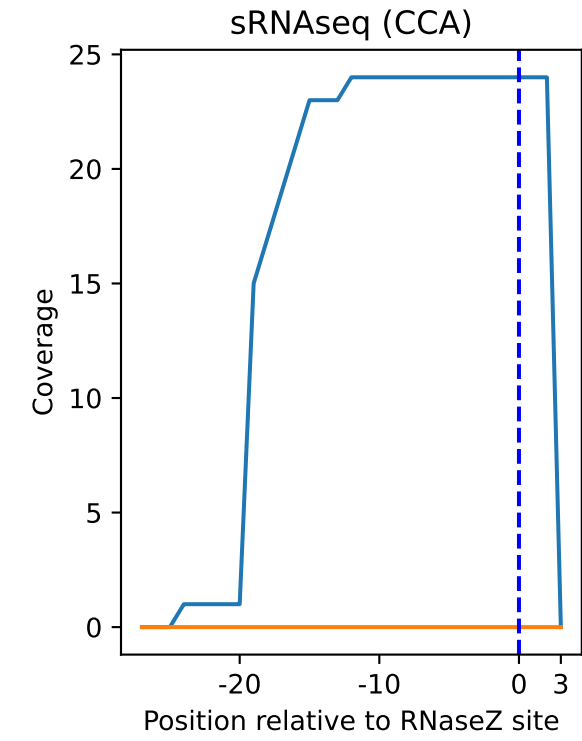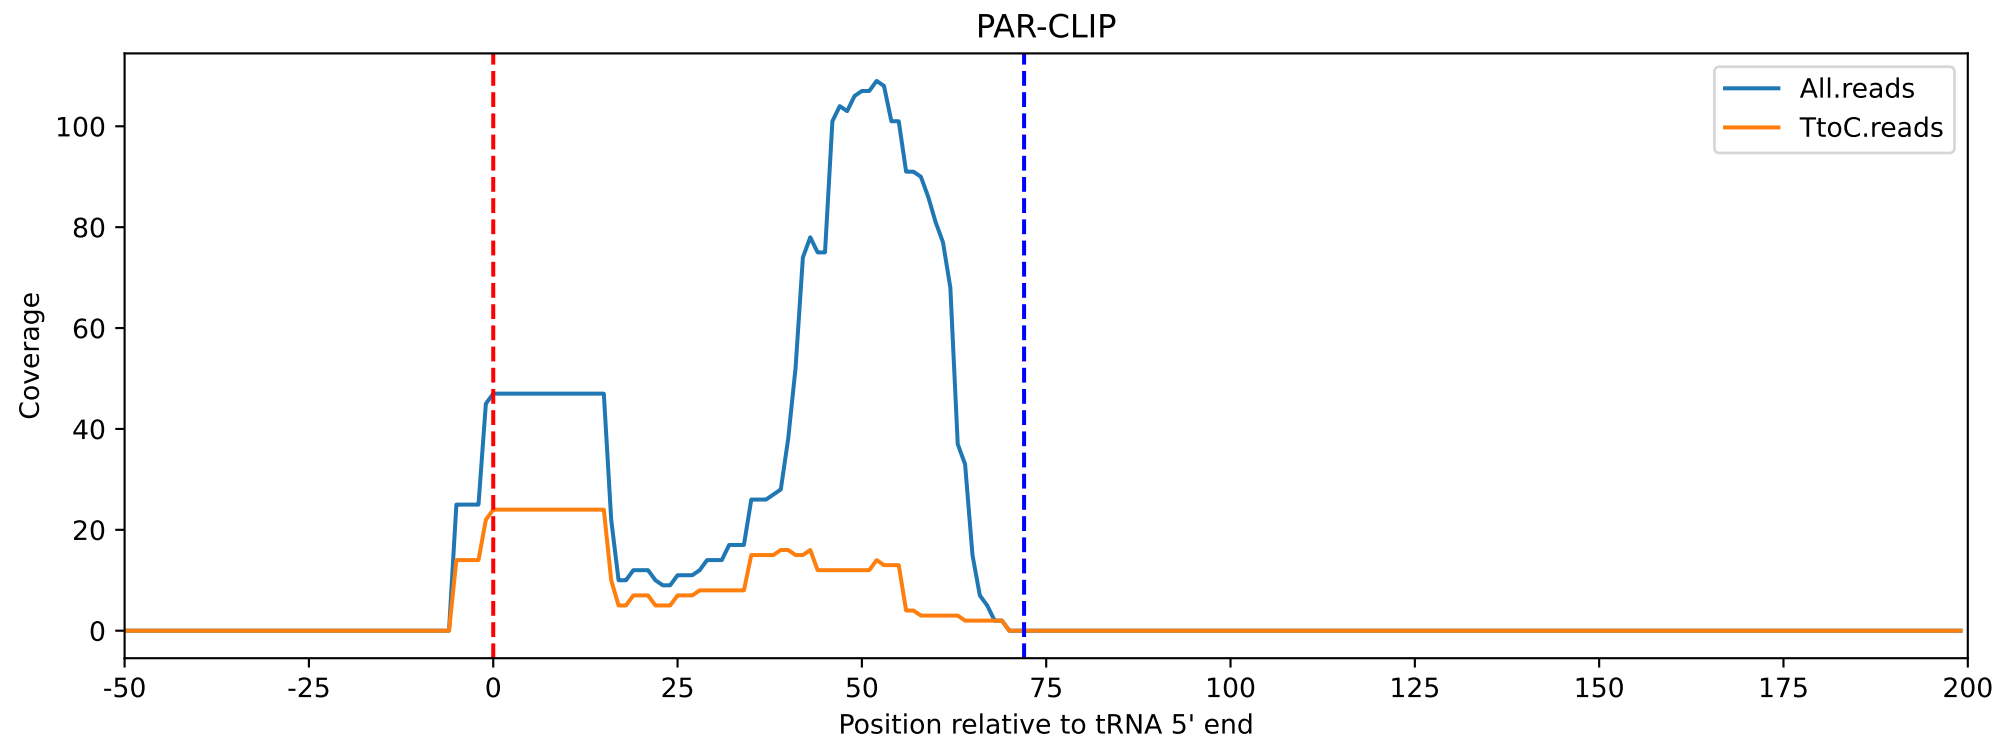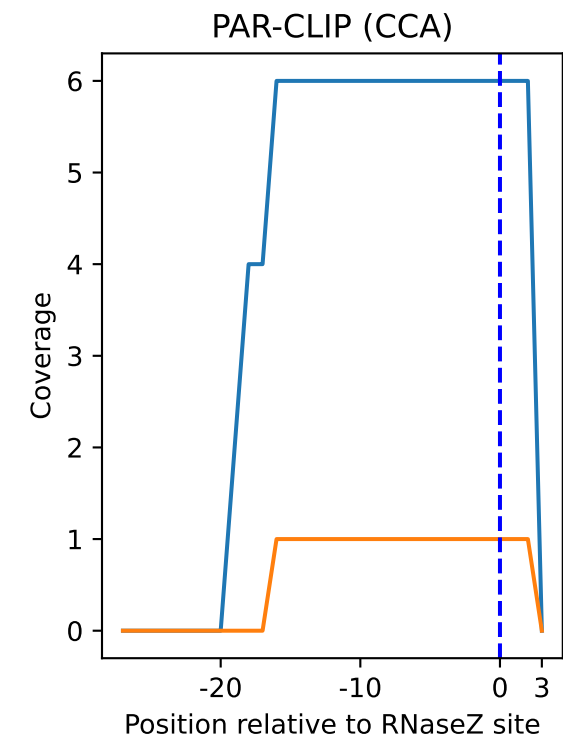

# tRNA-Ser-CGA-1-1

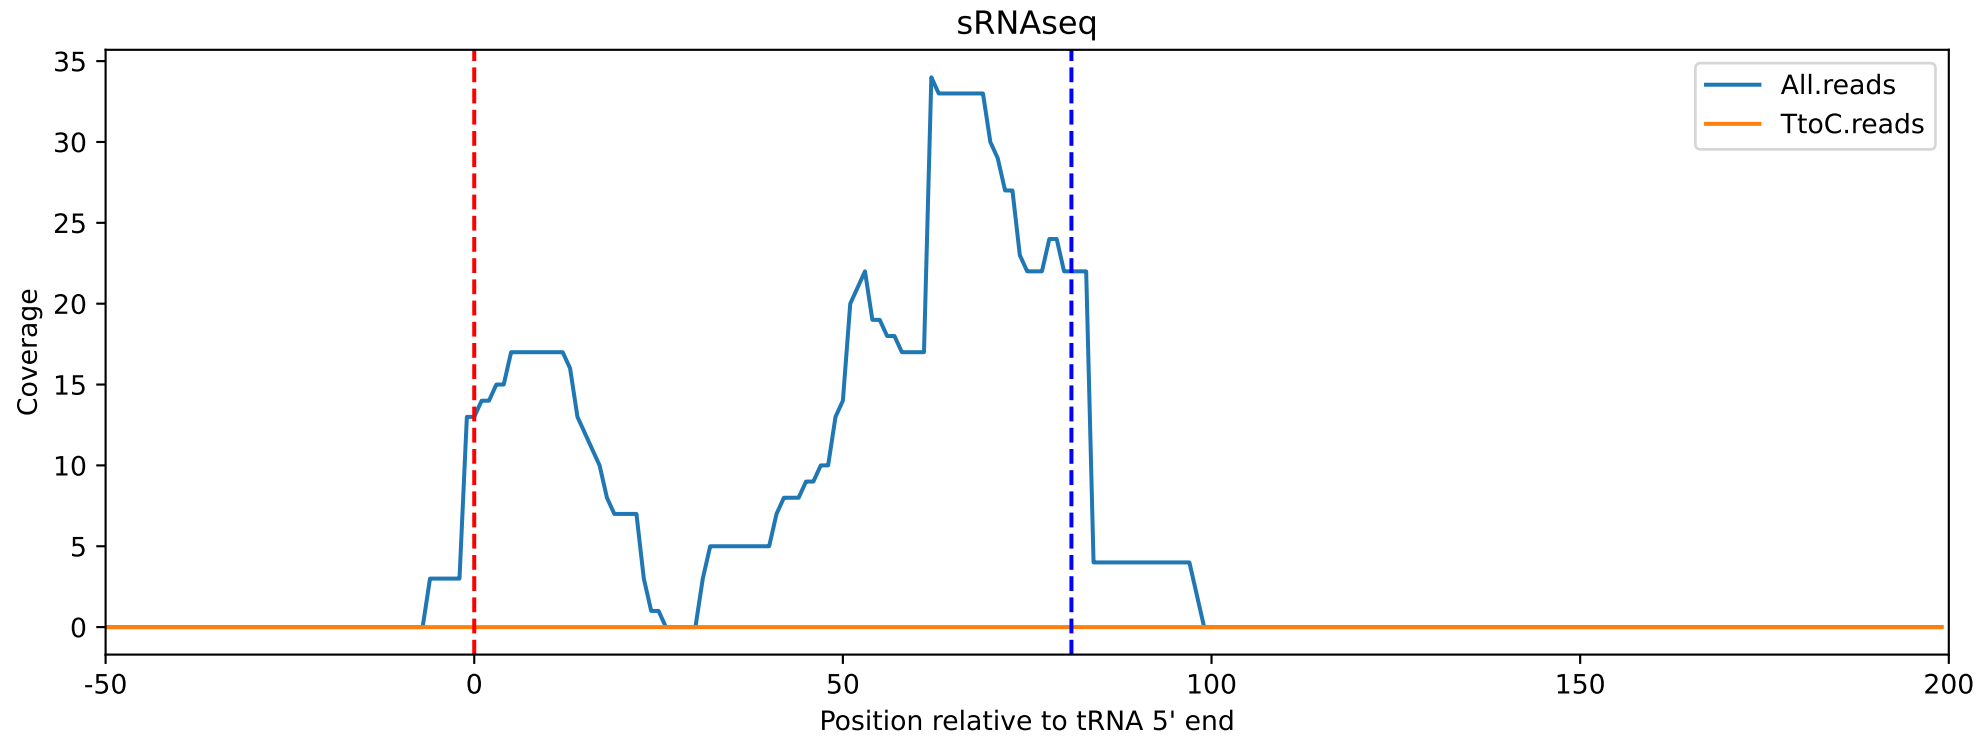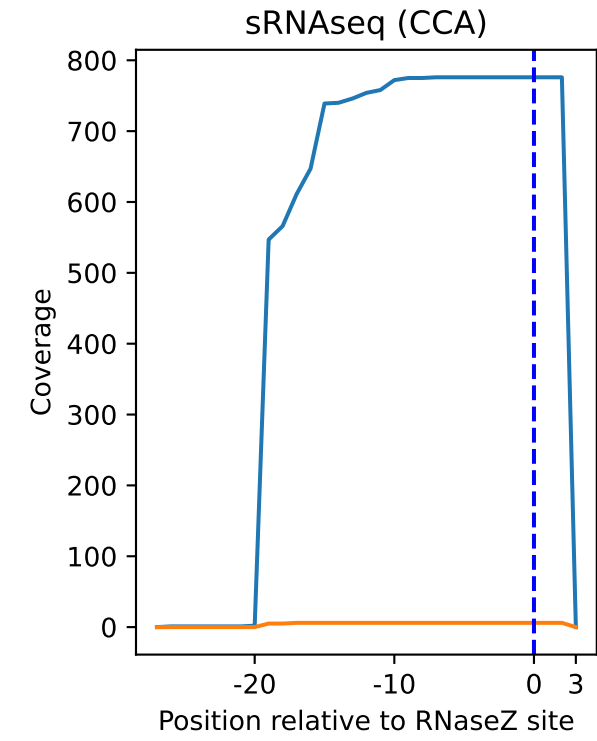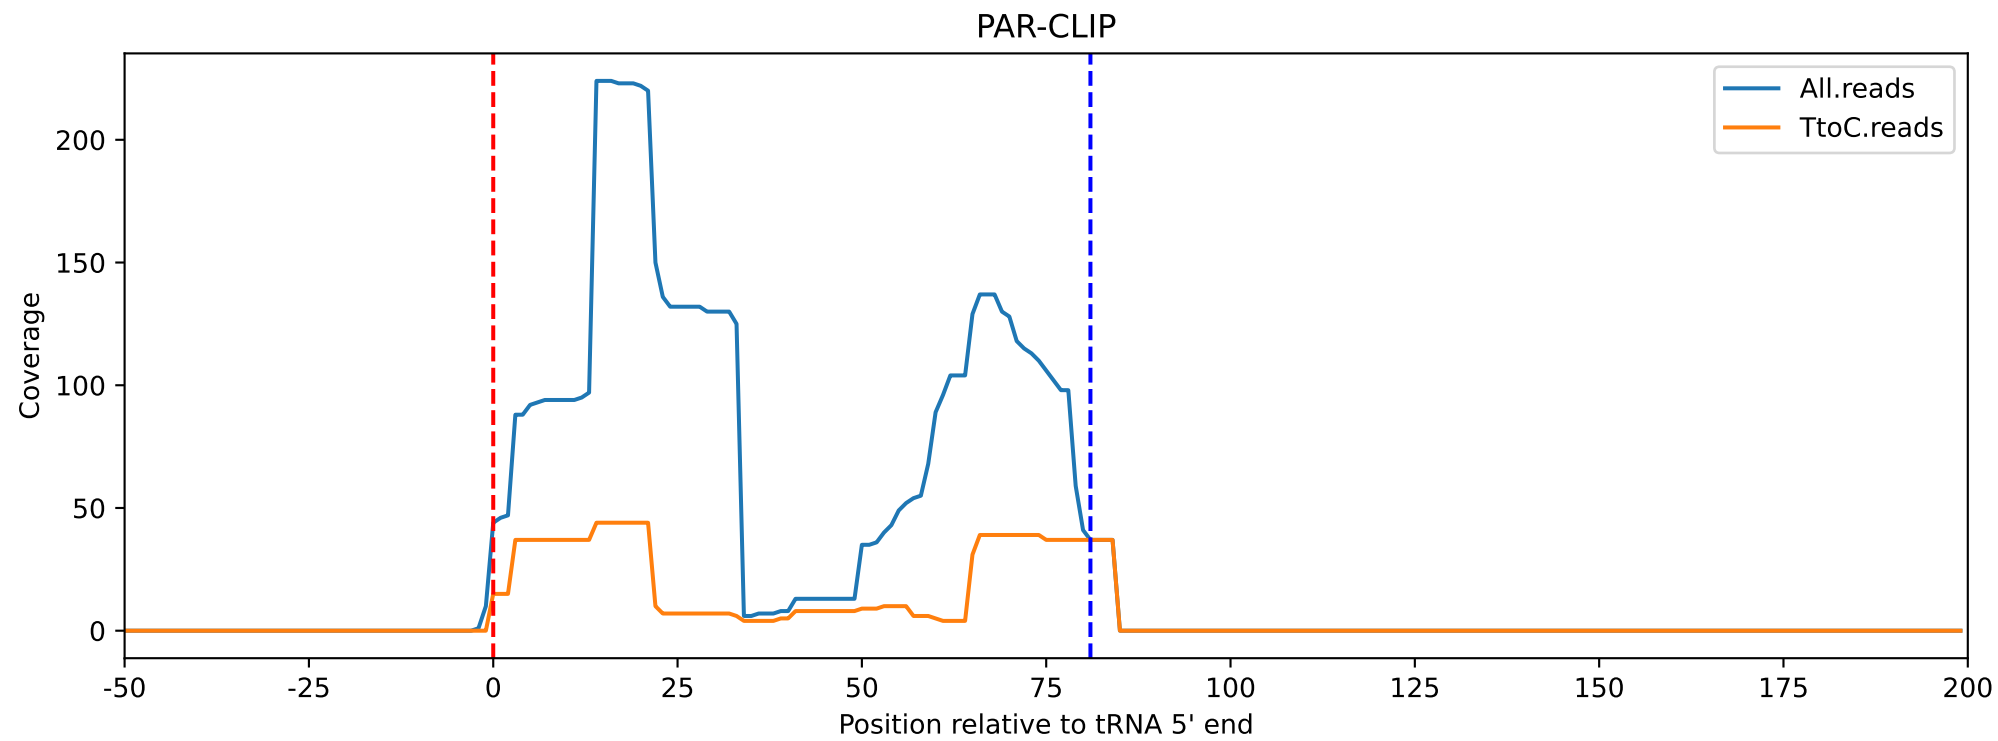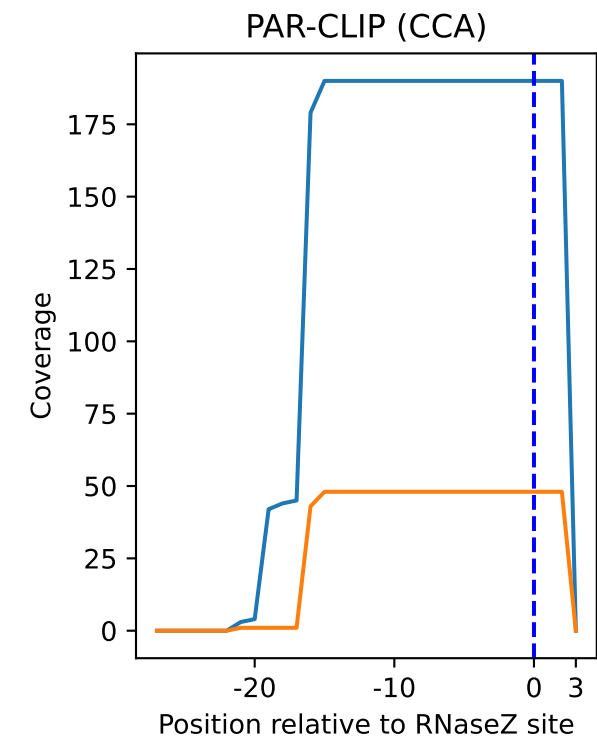

# tRNA-Ser-CGA-1-2

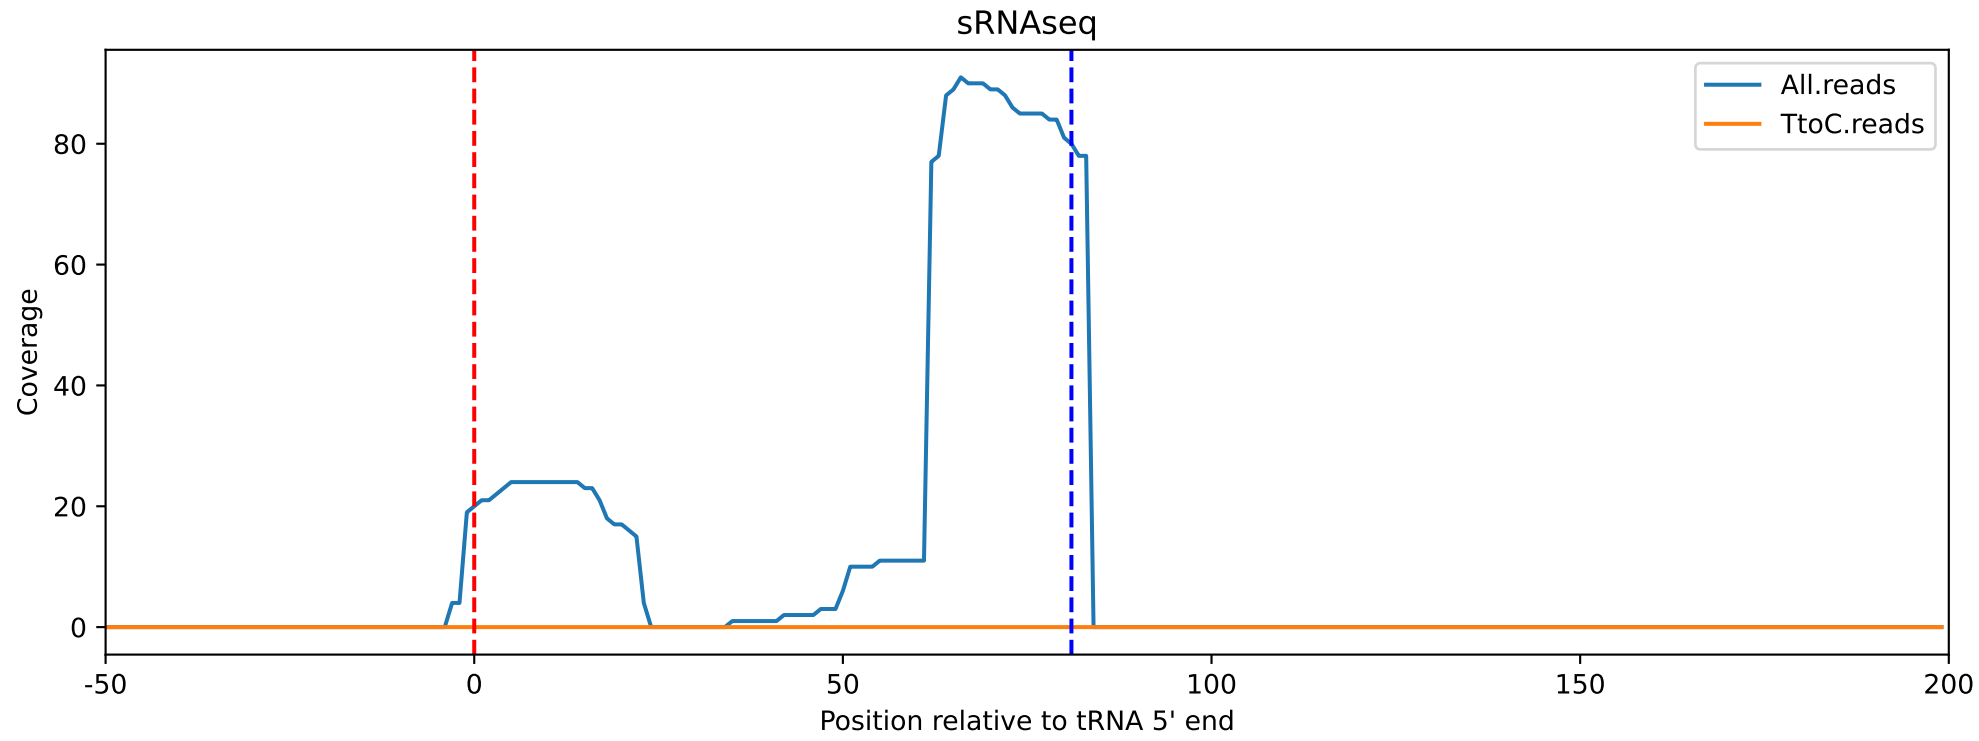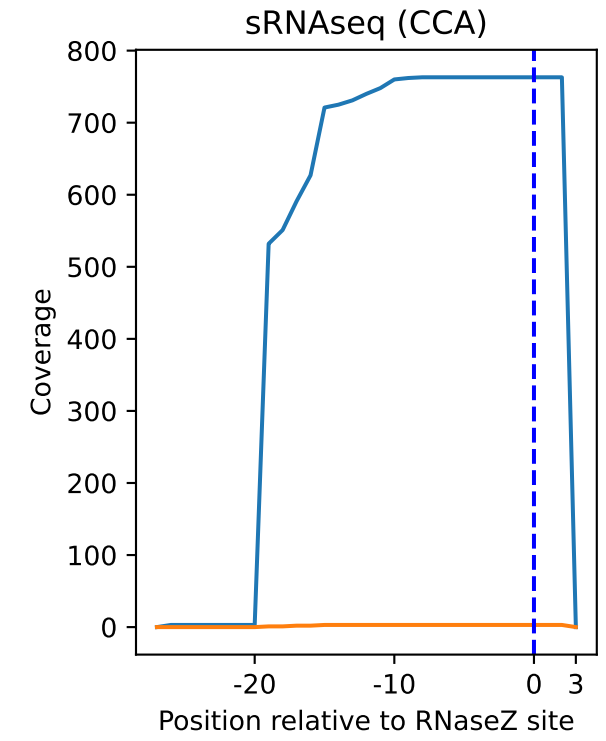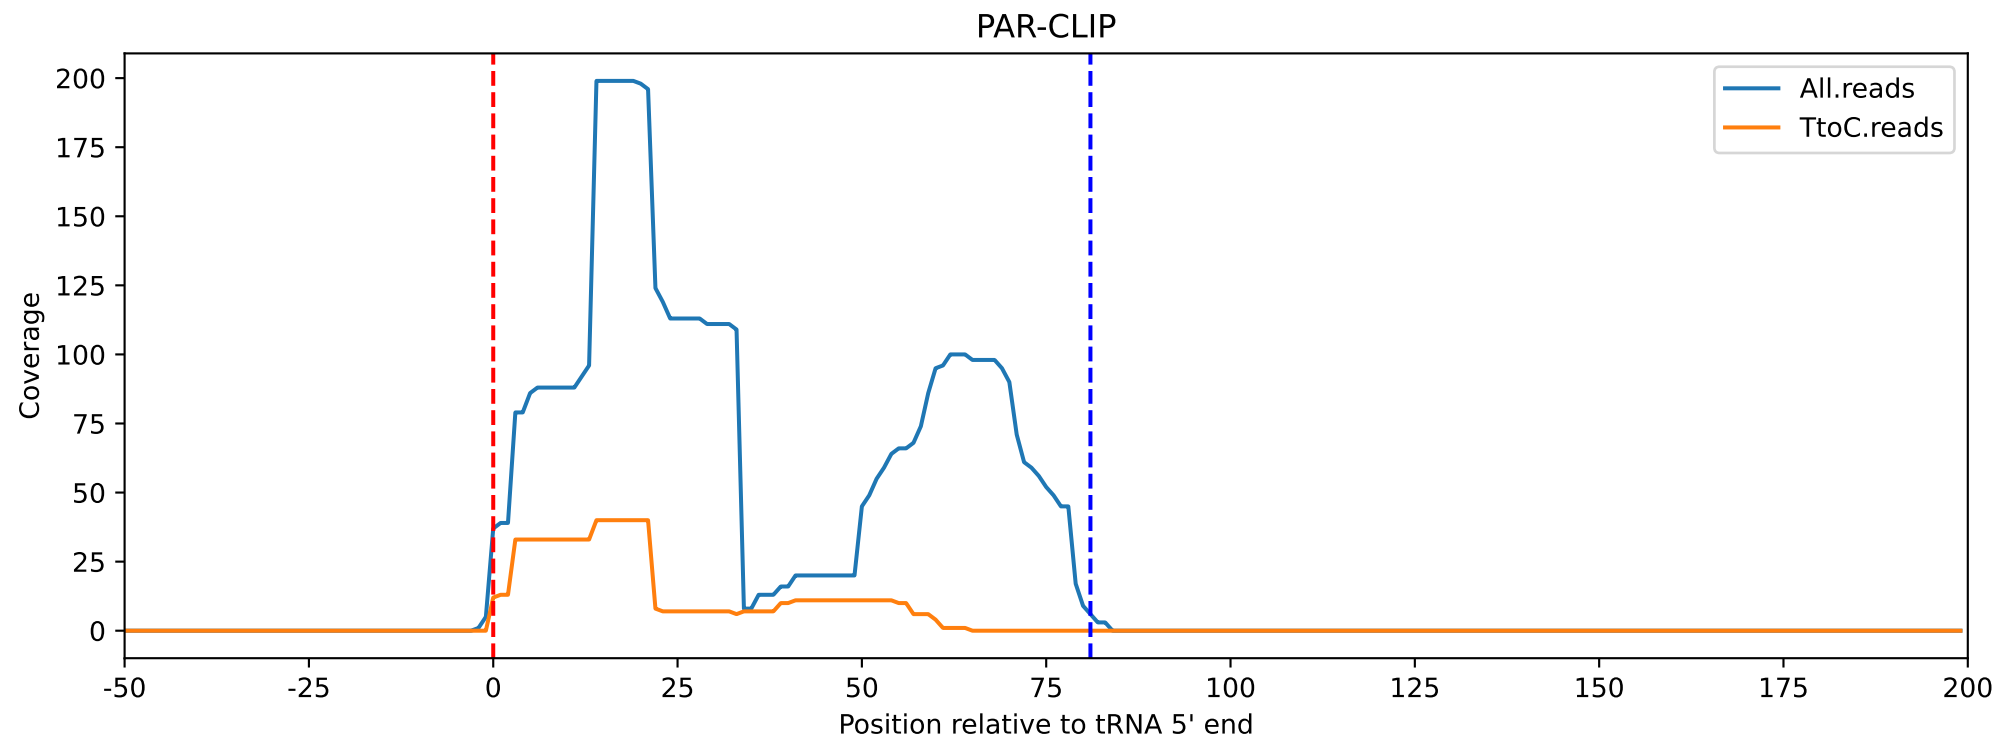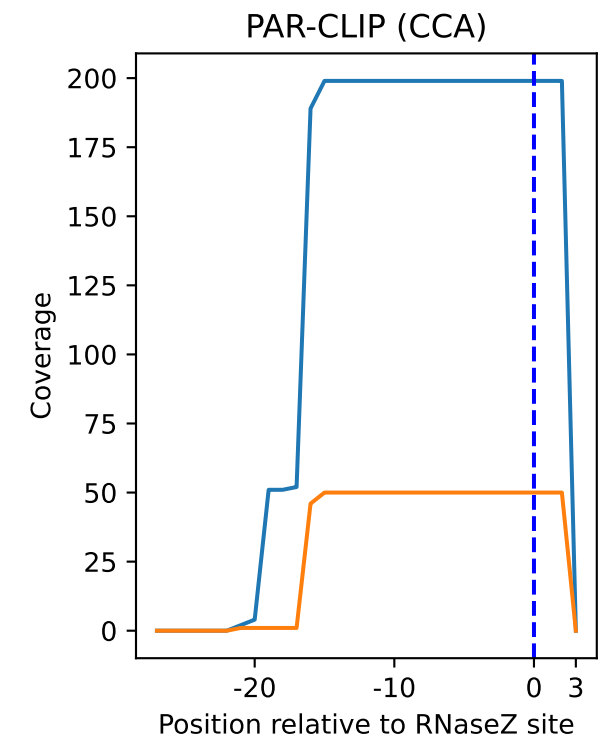



# tRNA-Arg-TCG-3-1

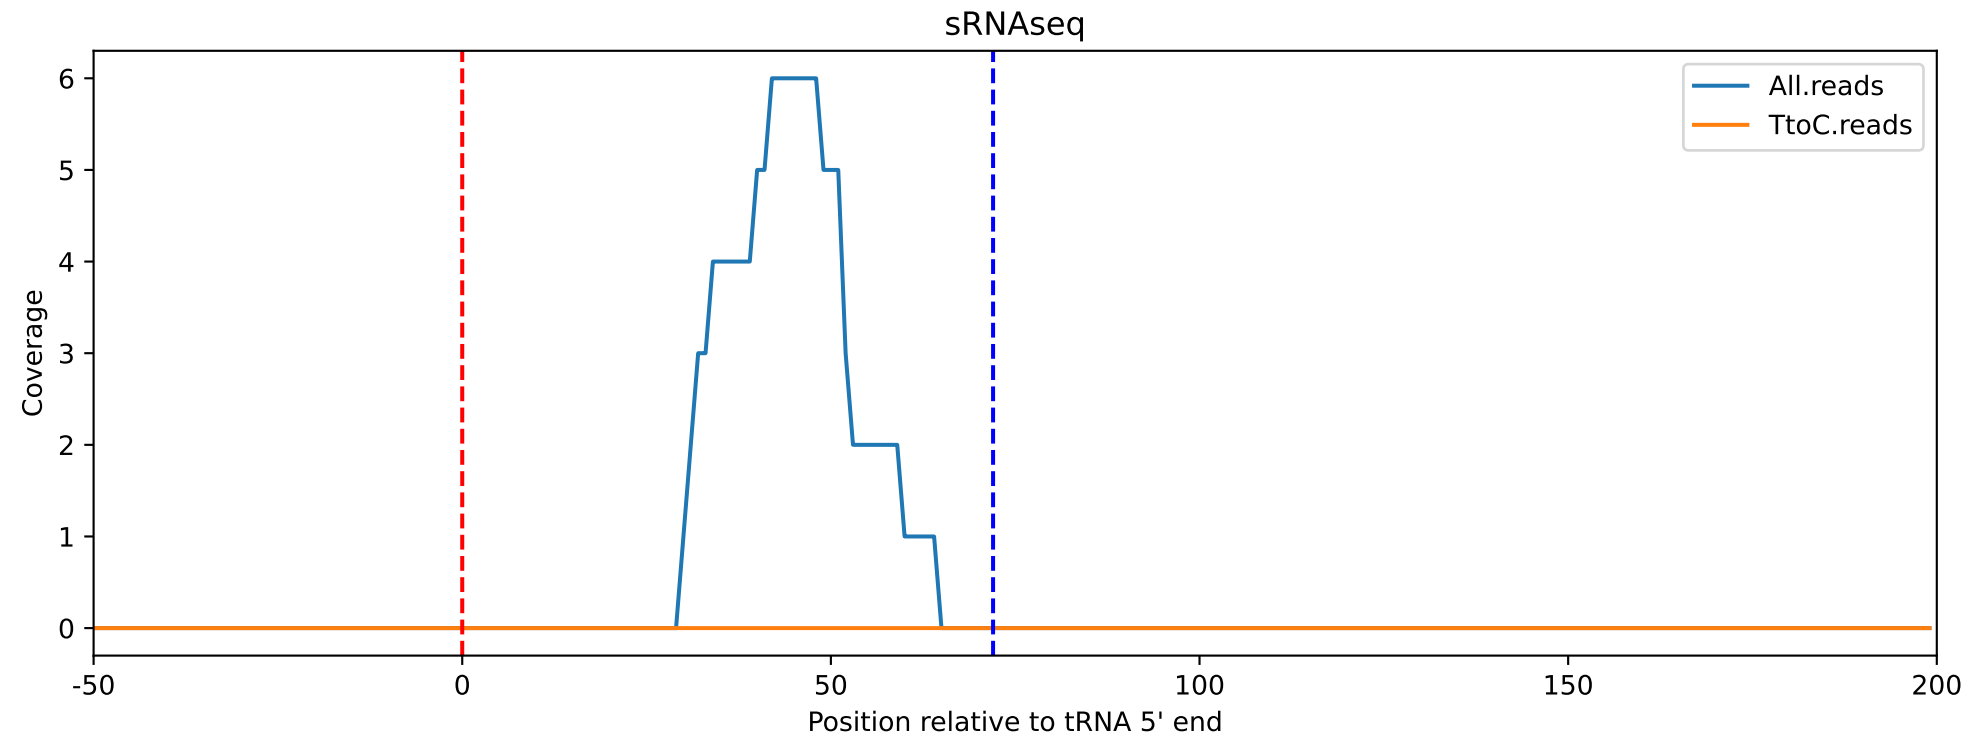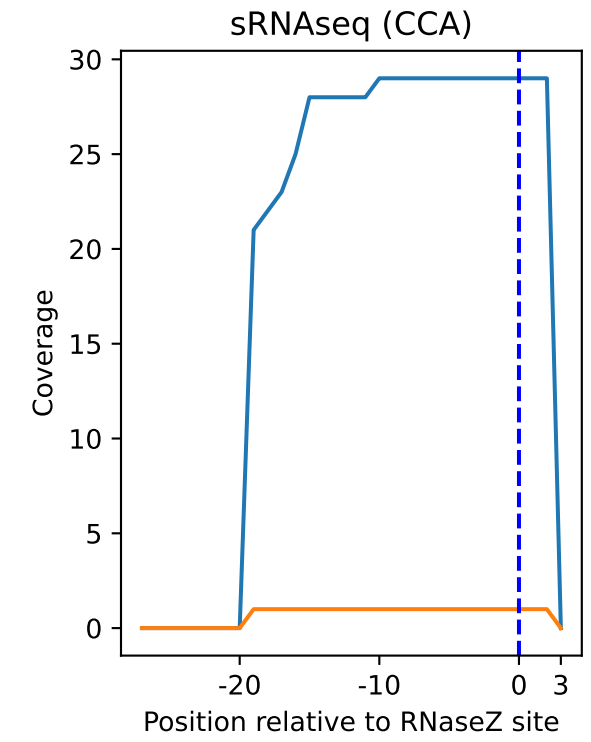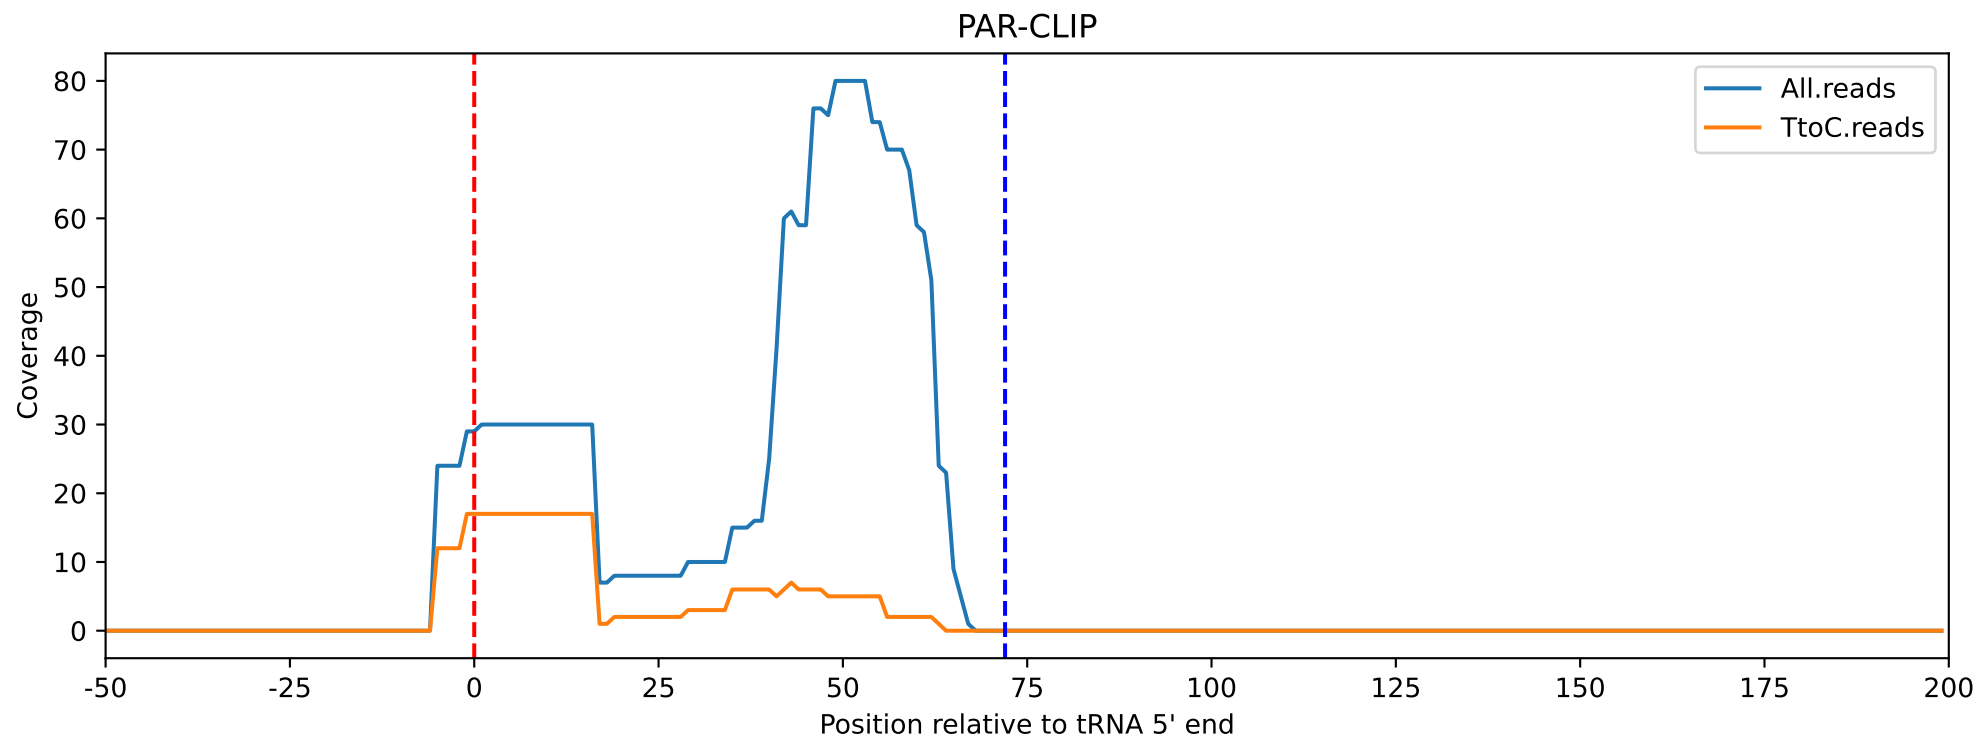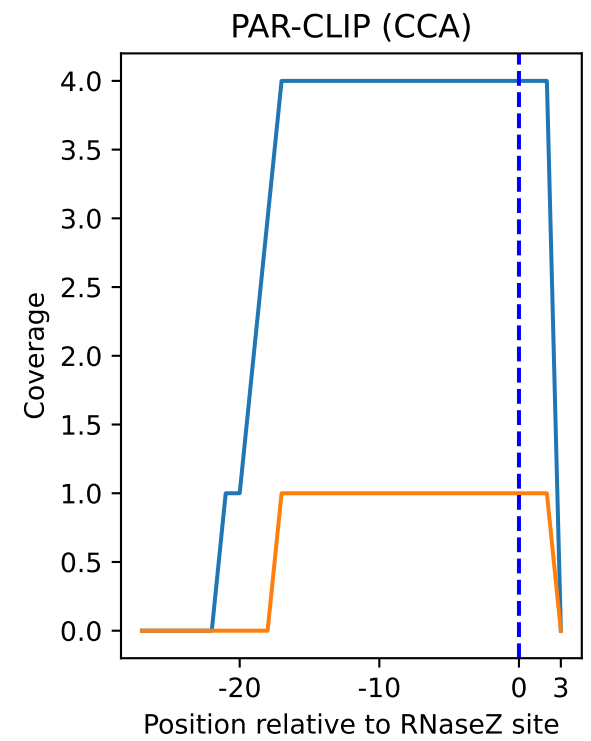

# tRNA-Arg-TCG-3-2

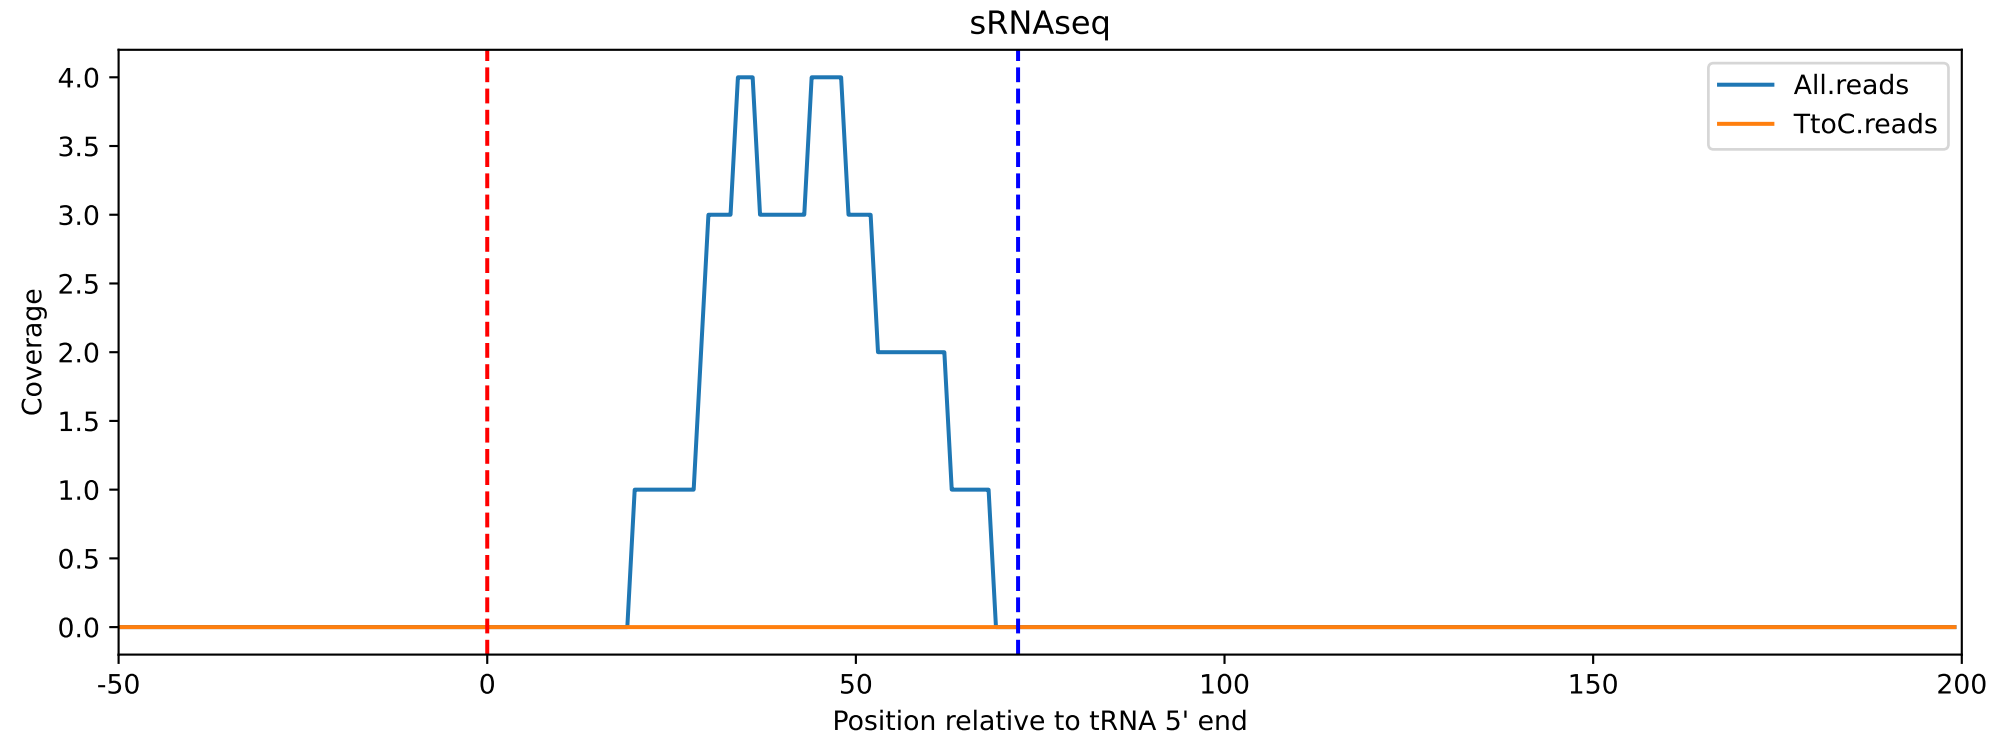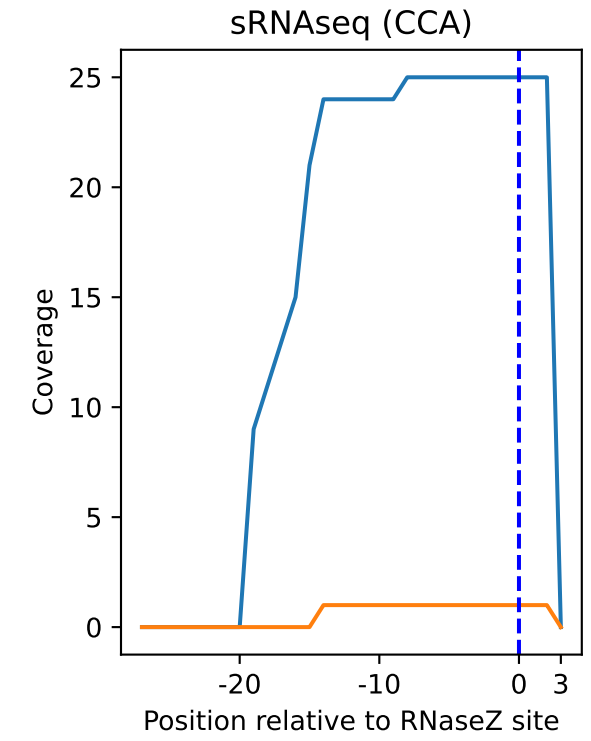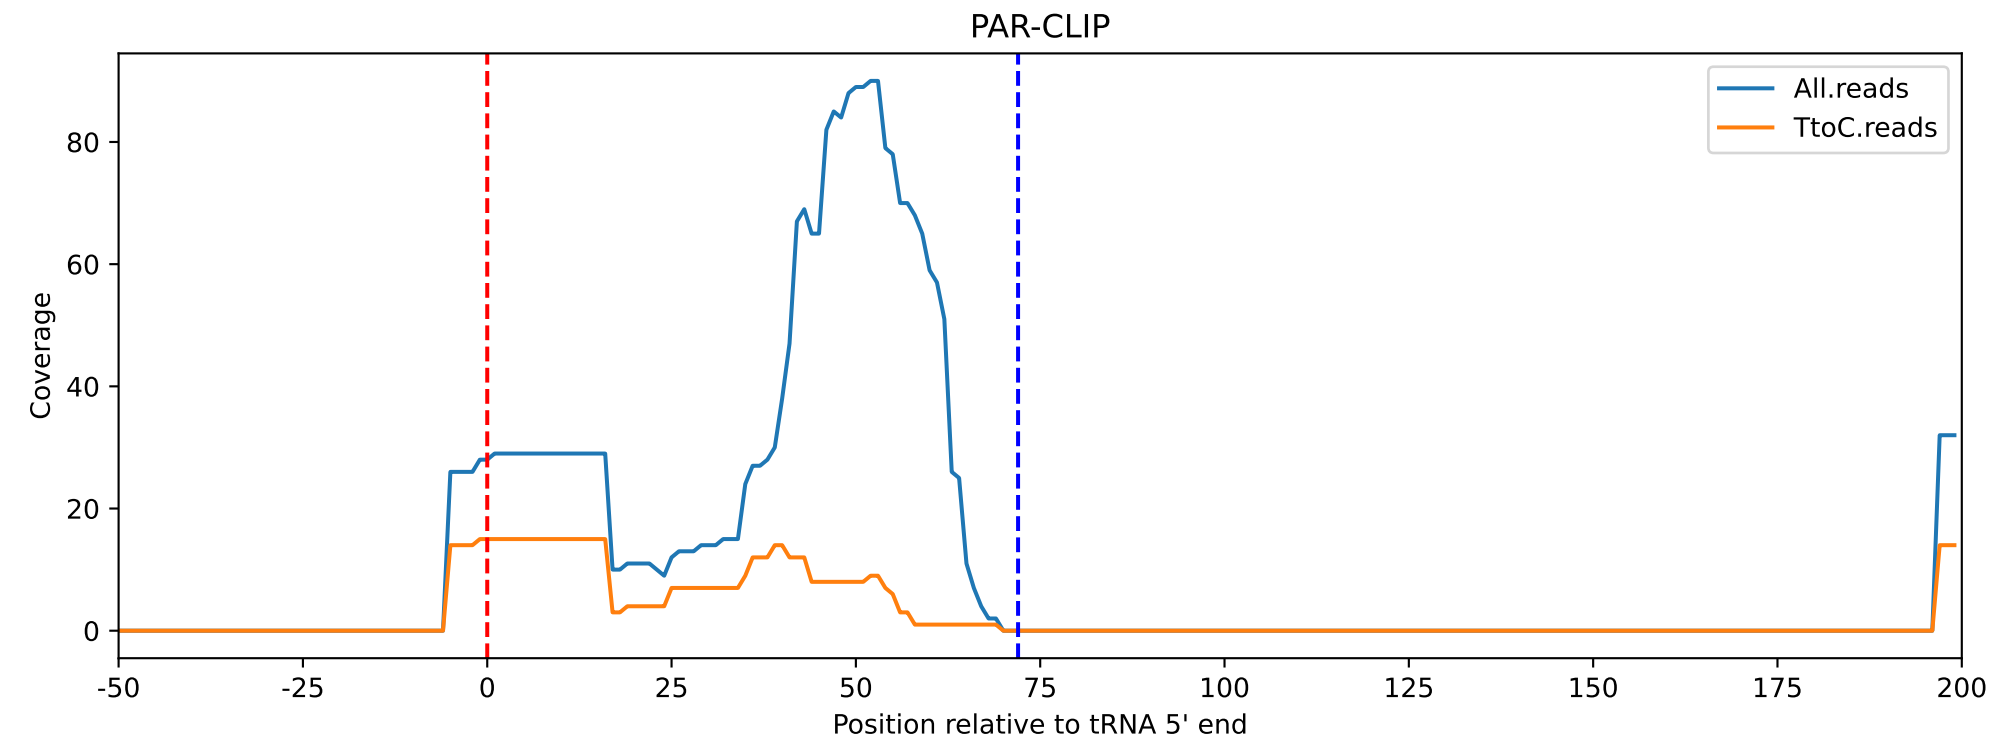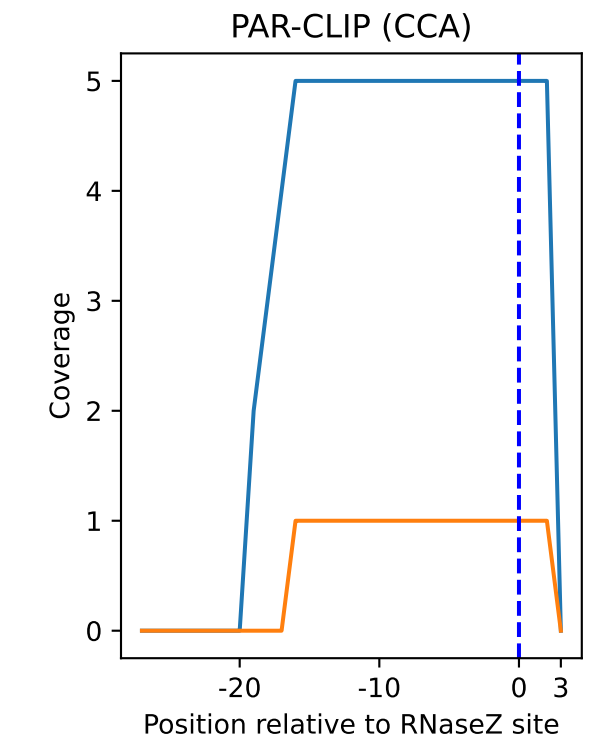

# tRNA-Arg-TCG-3-3

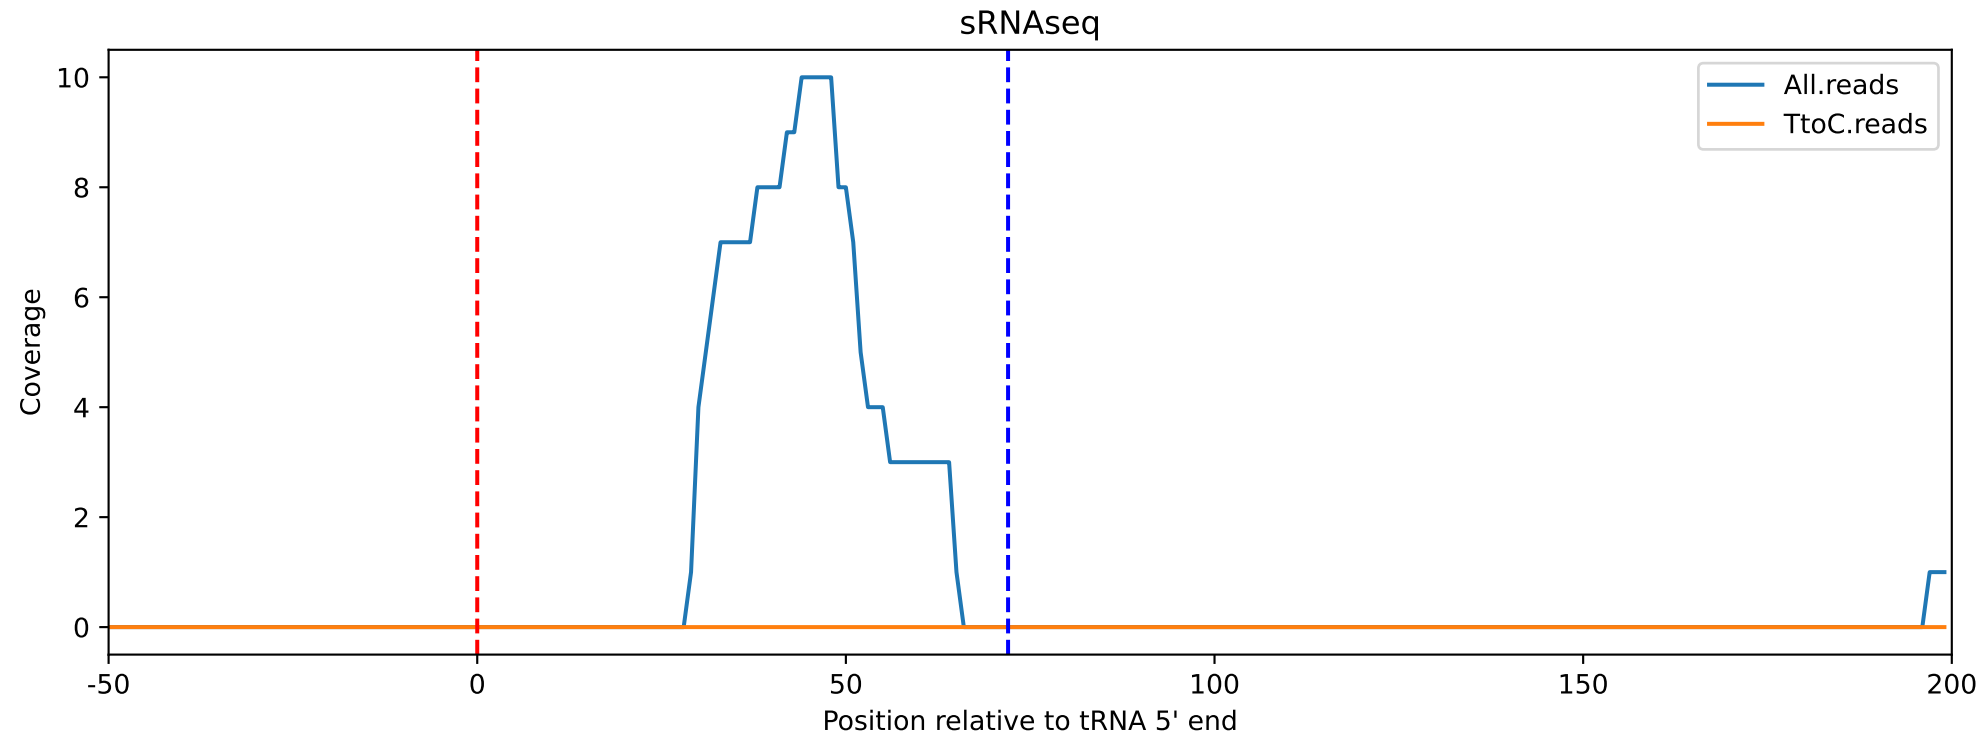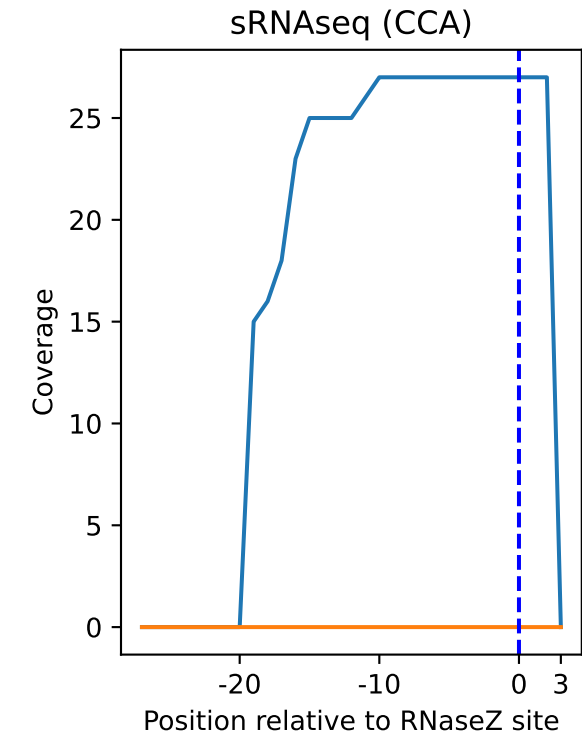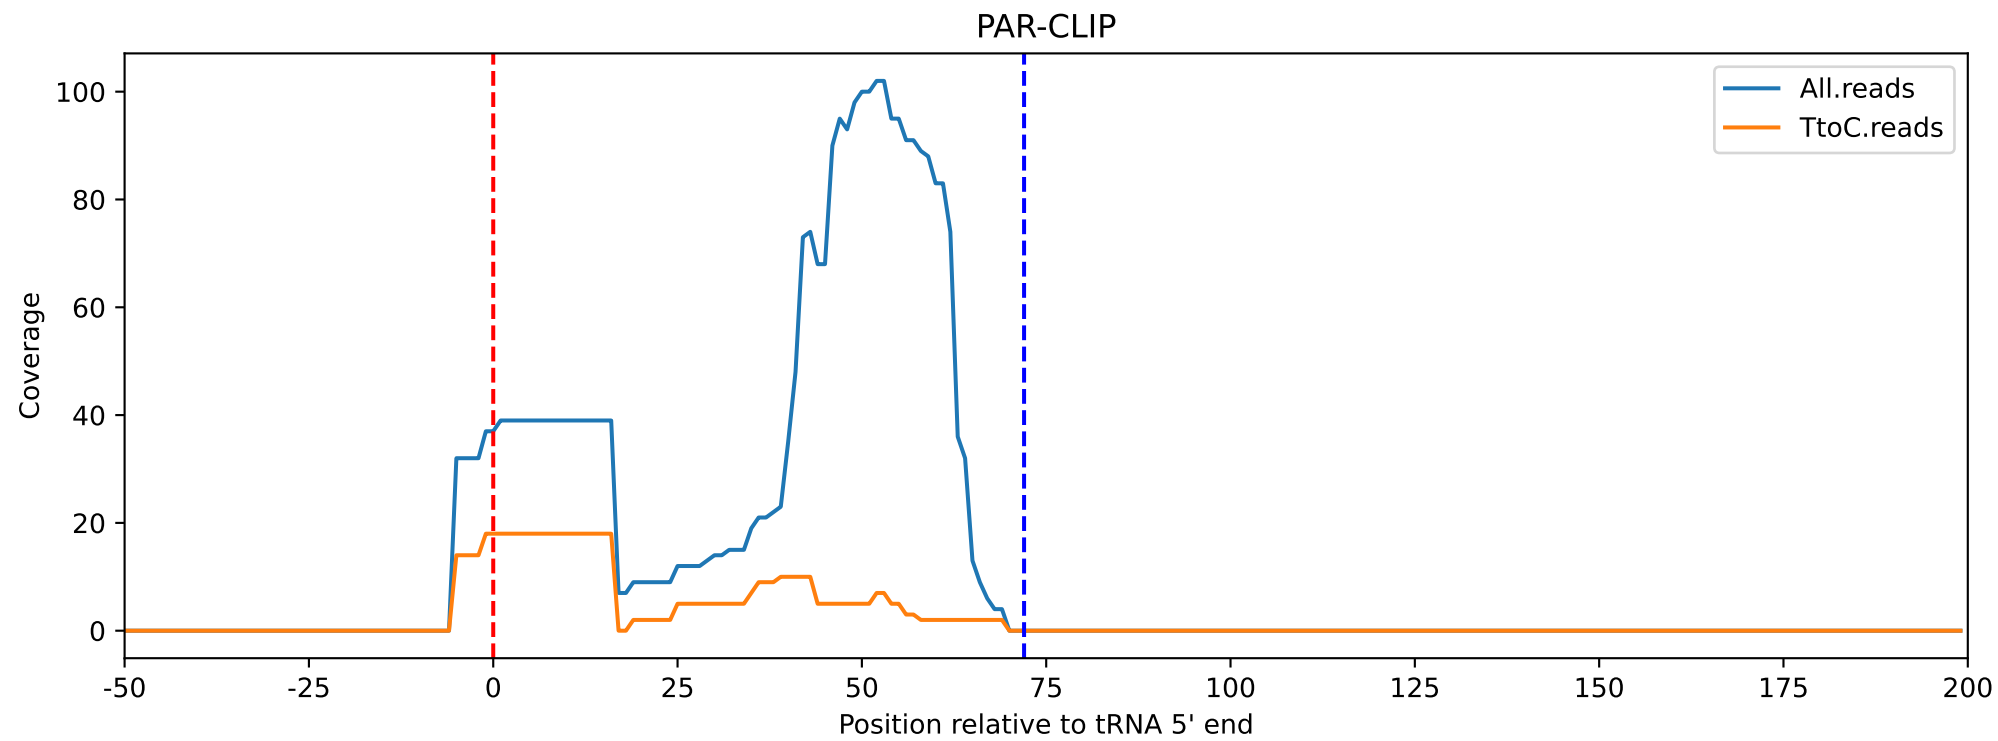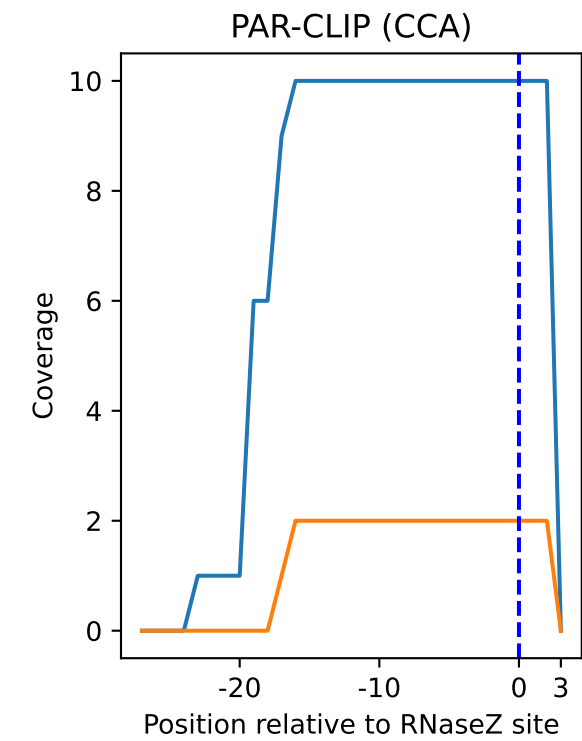

# tRNA-Arg-TCG-3-4

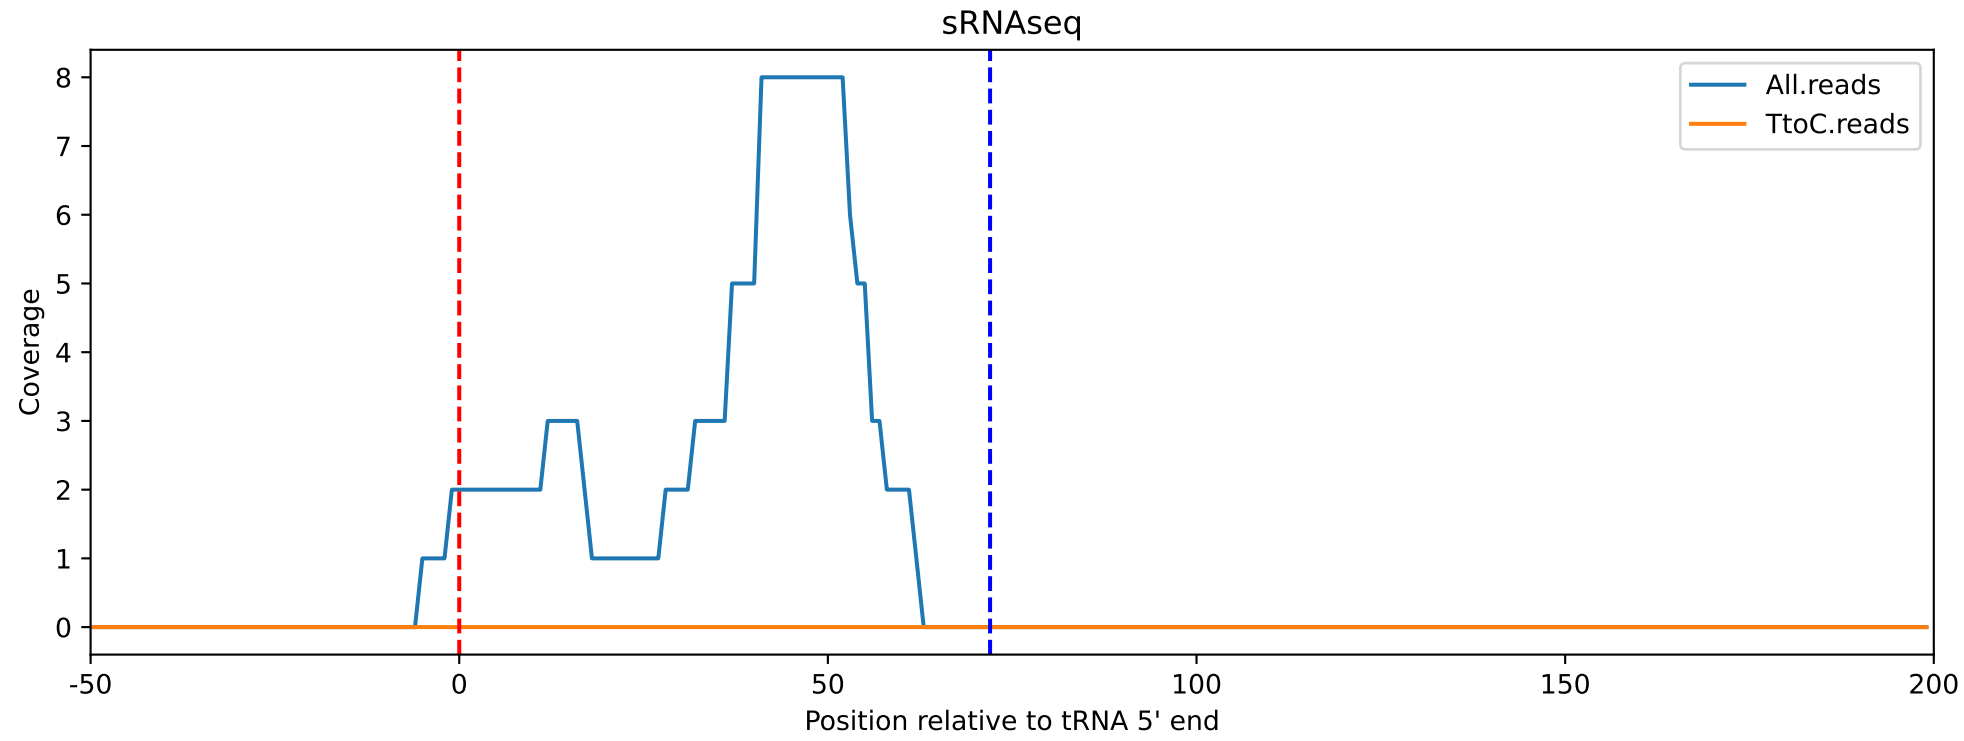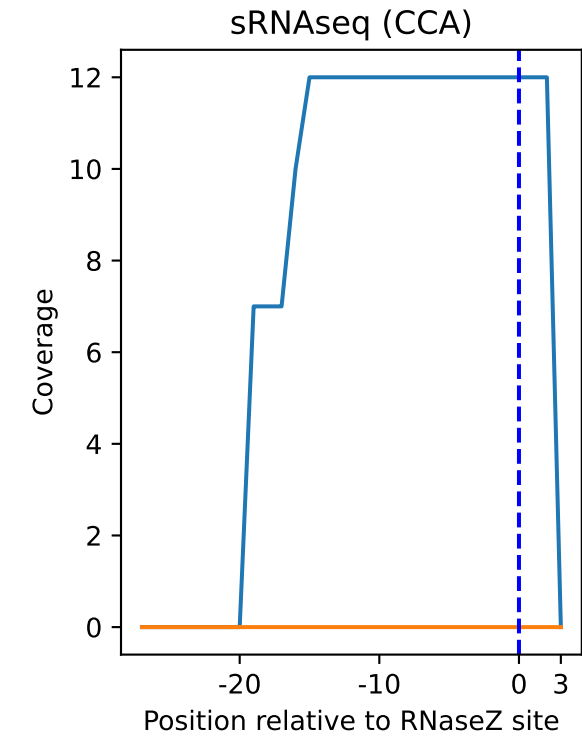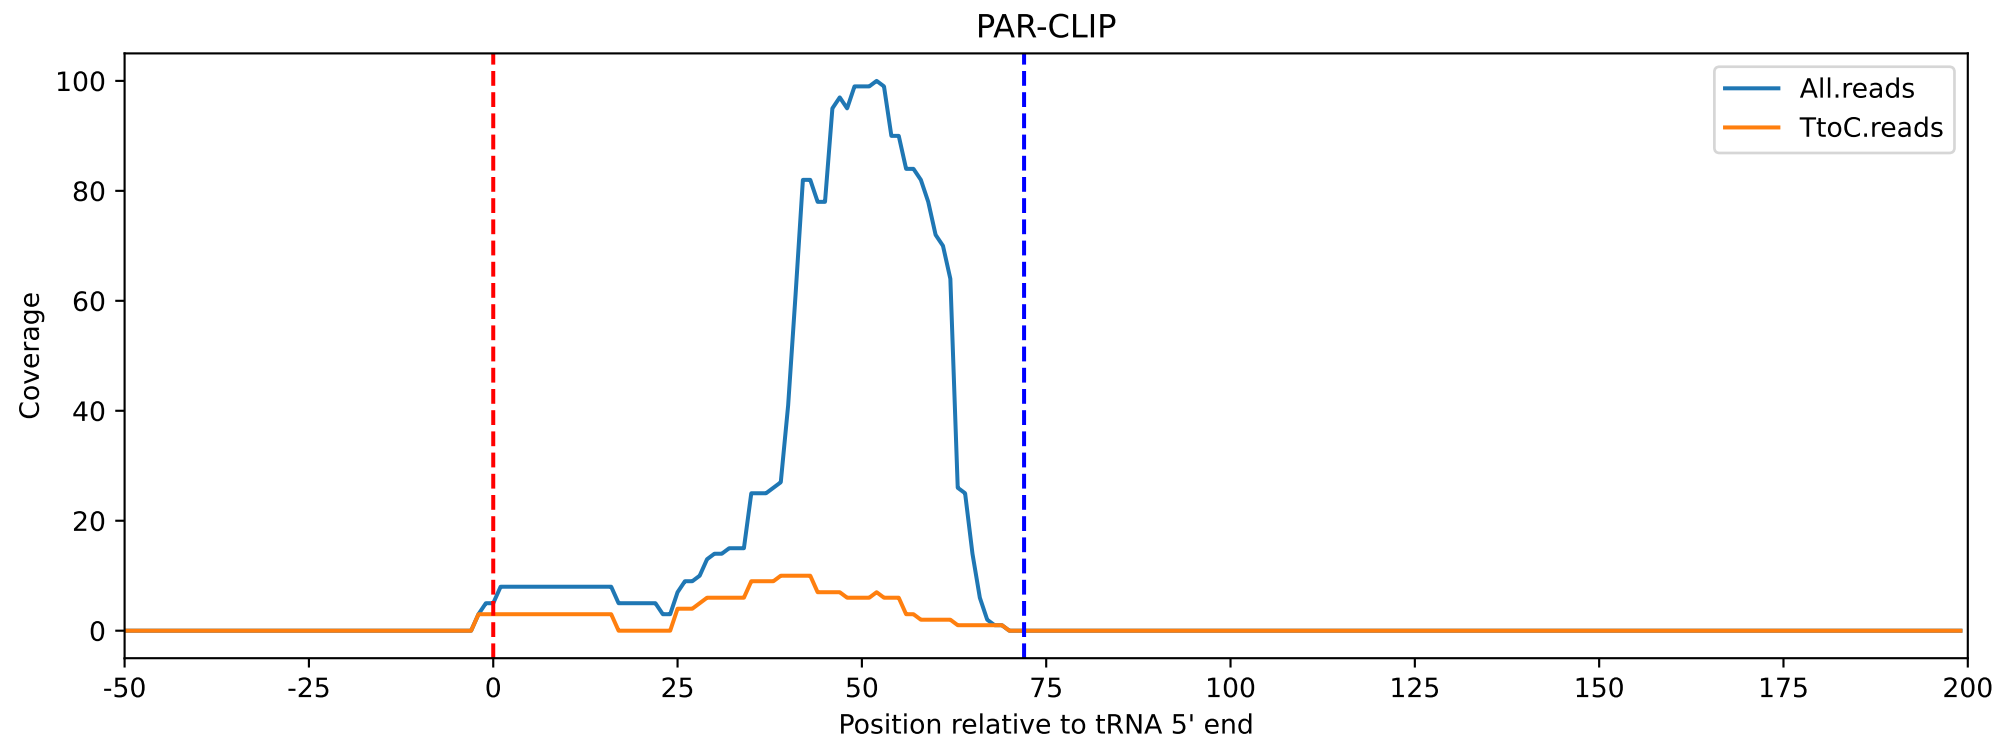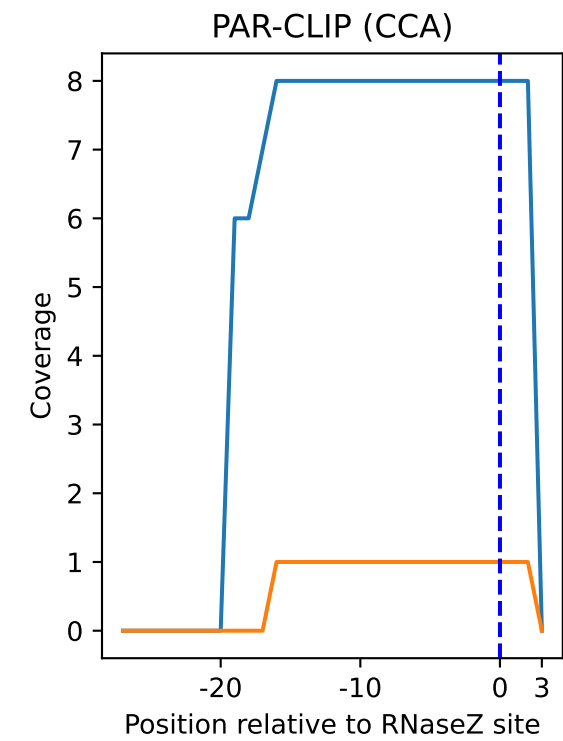

# tRNA-Pro-CGG-2-1

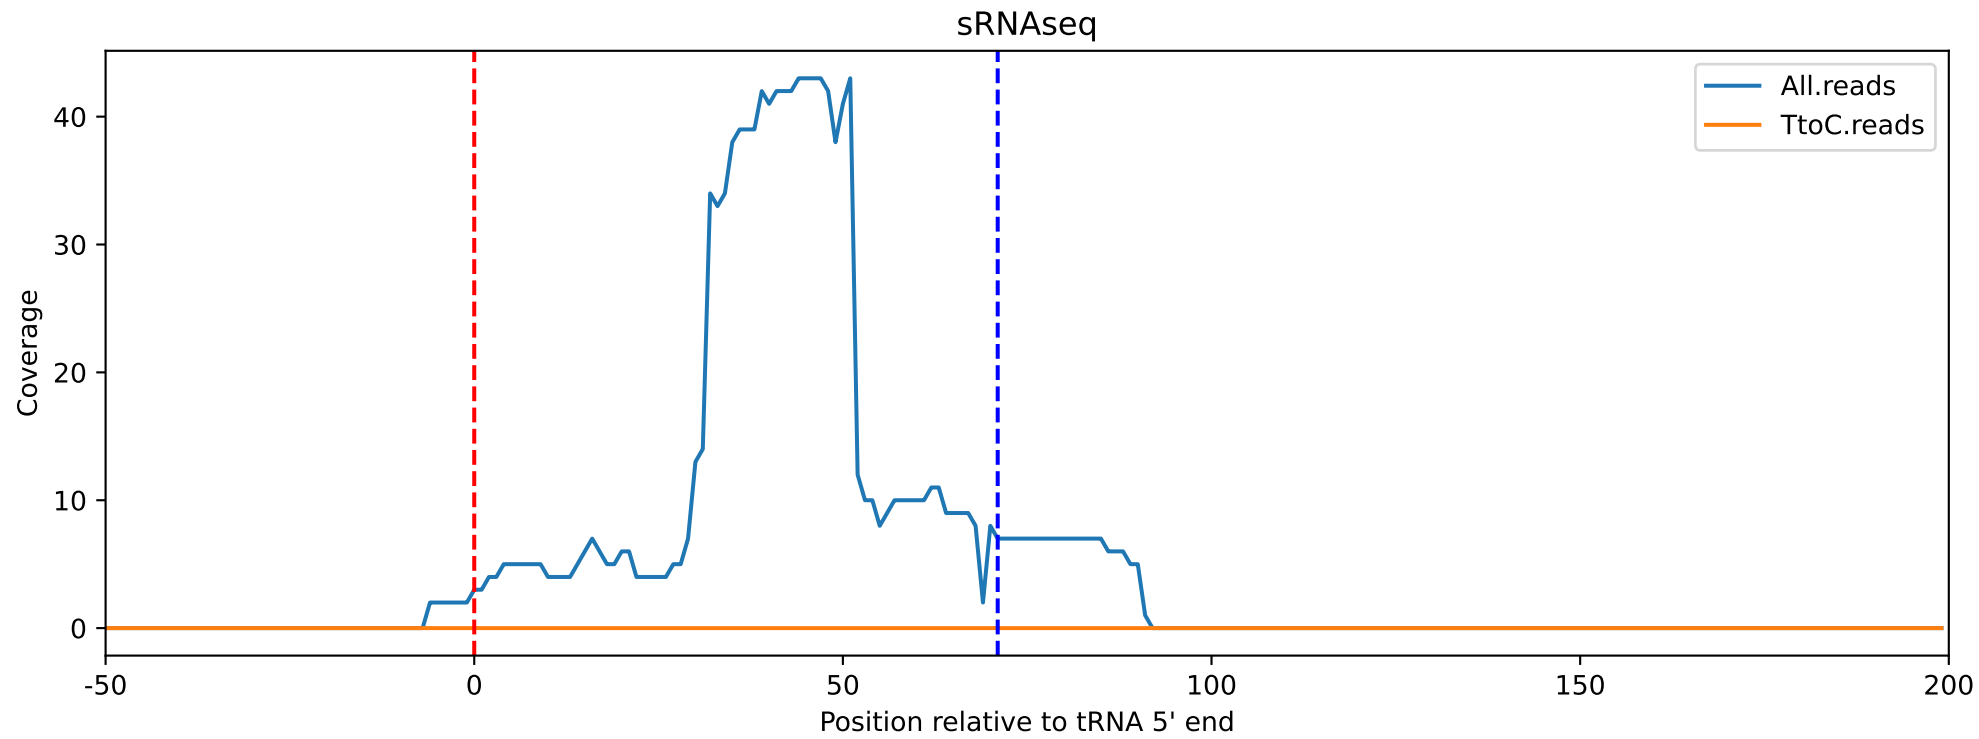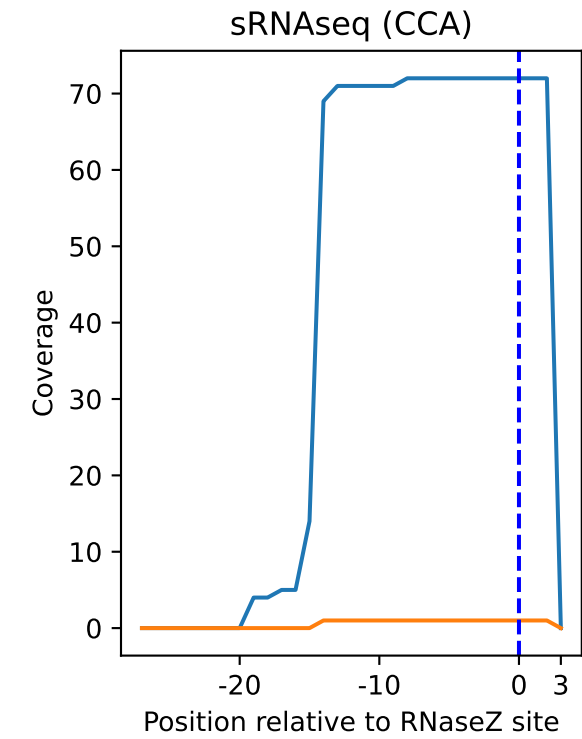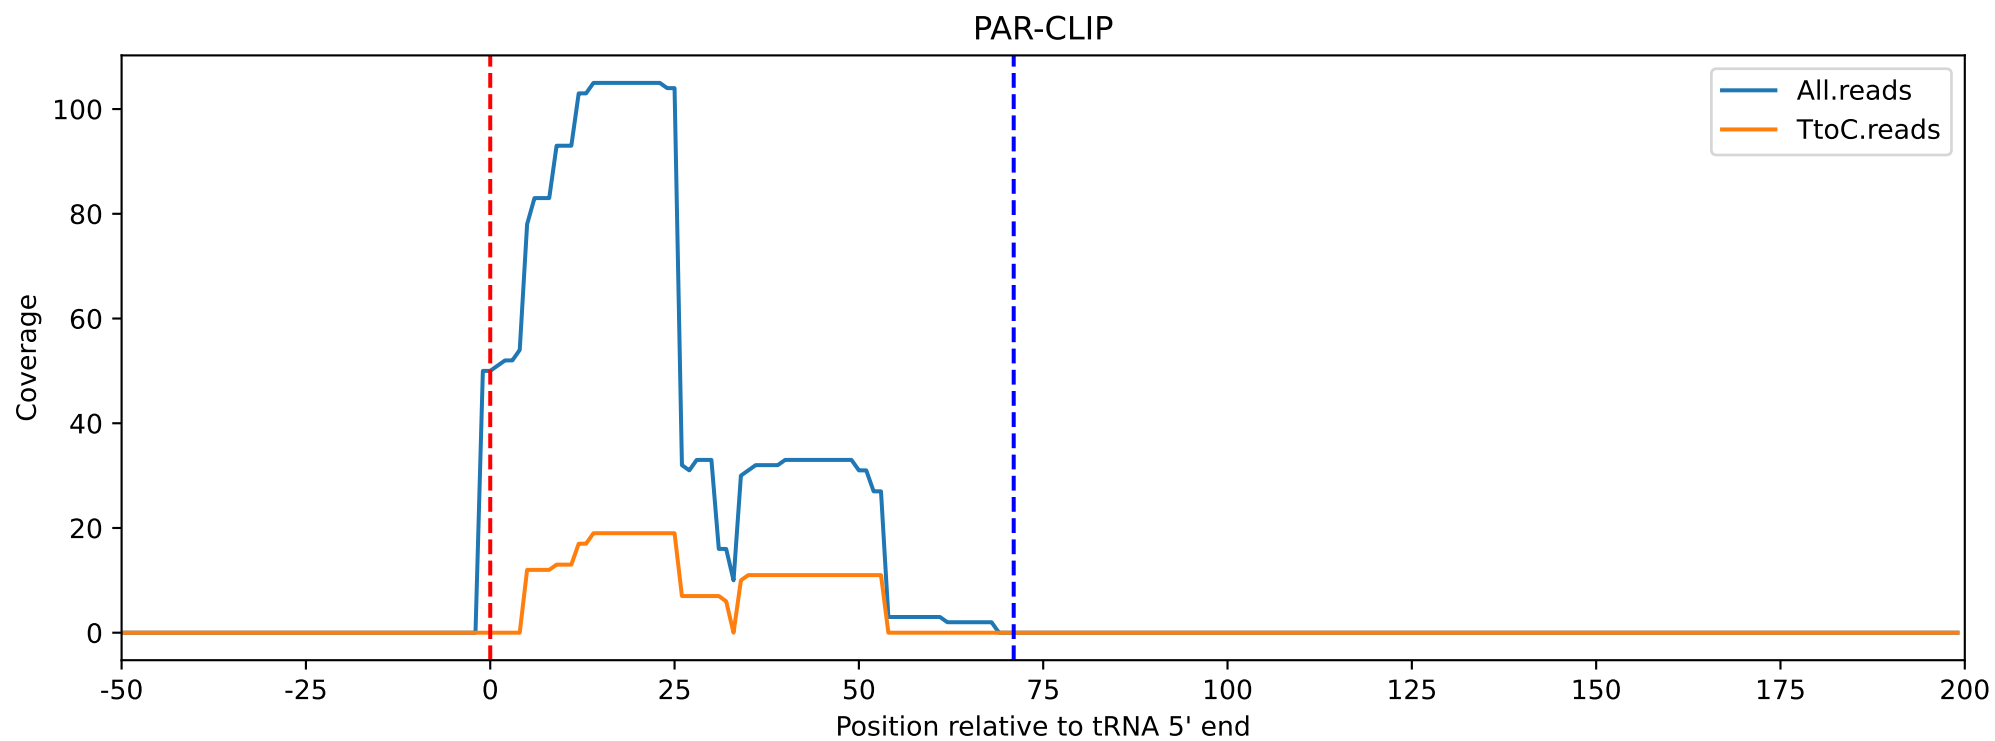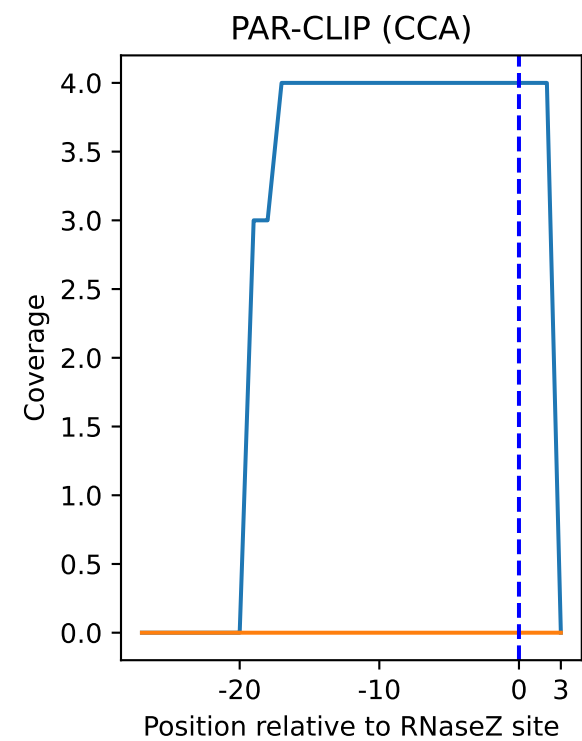

# tRNA-Arg-TCG-2-2

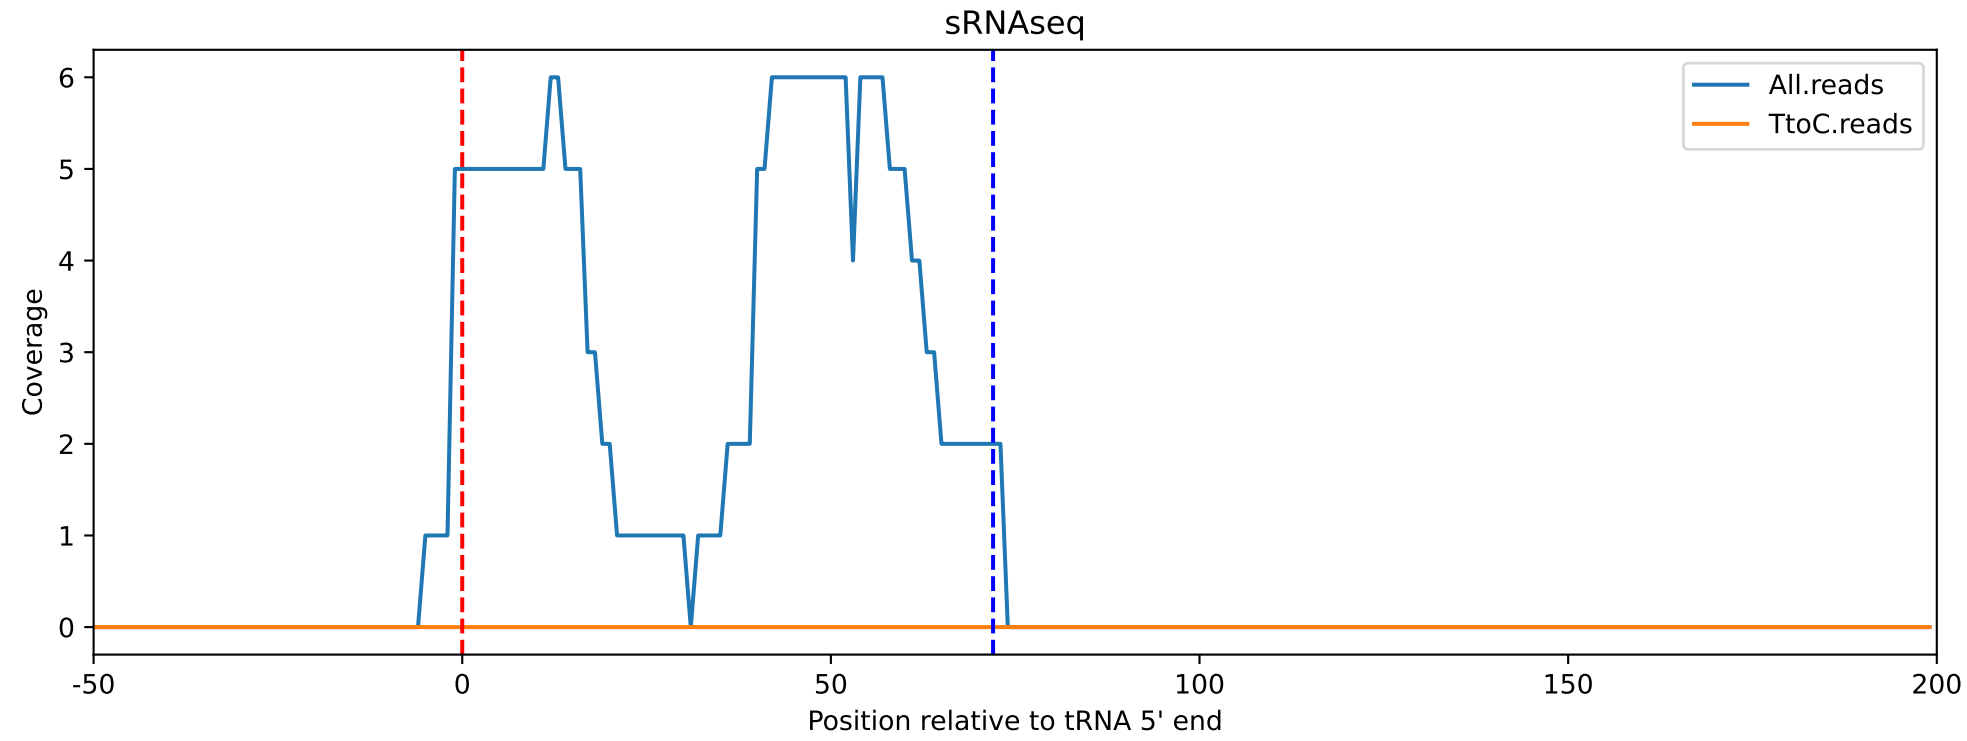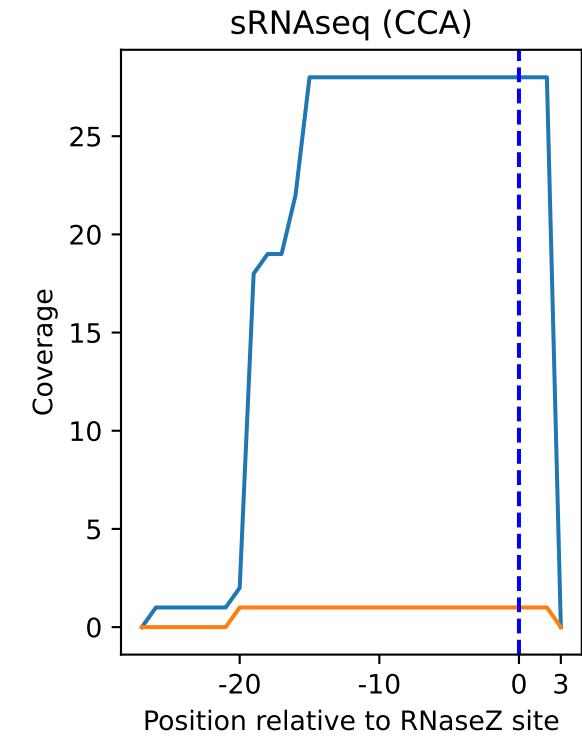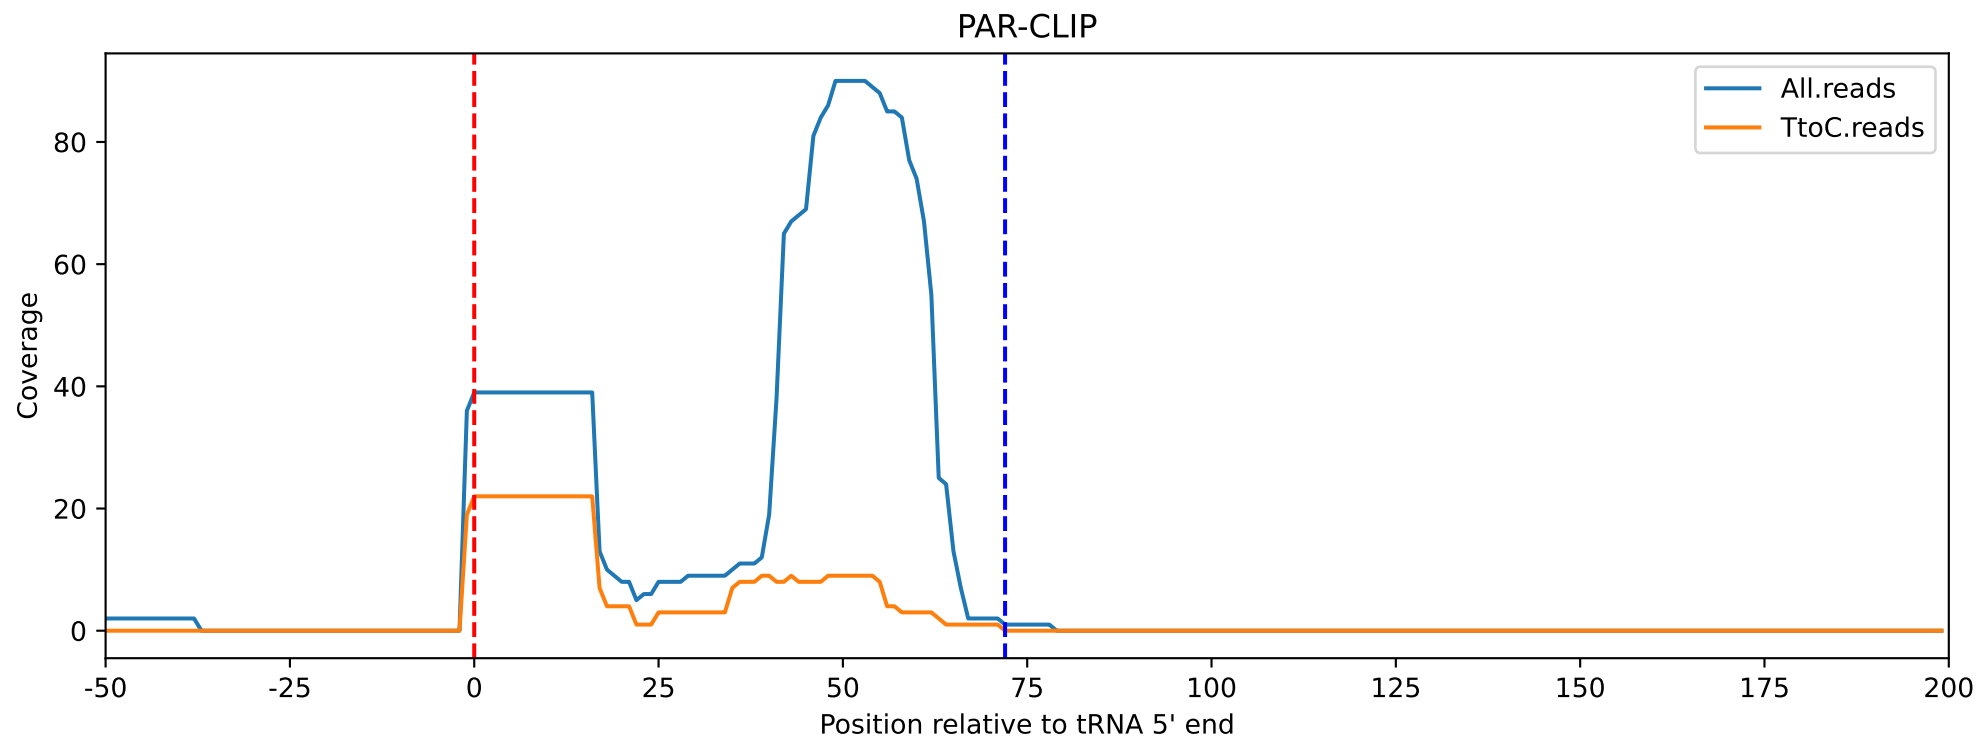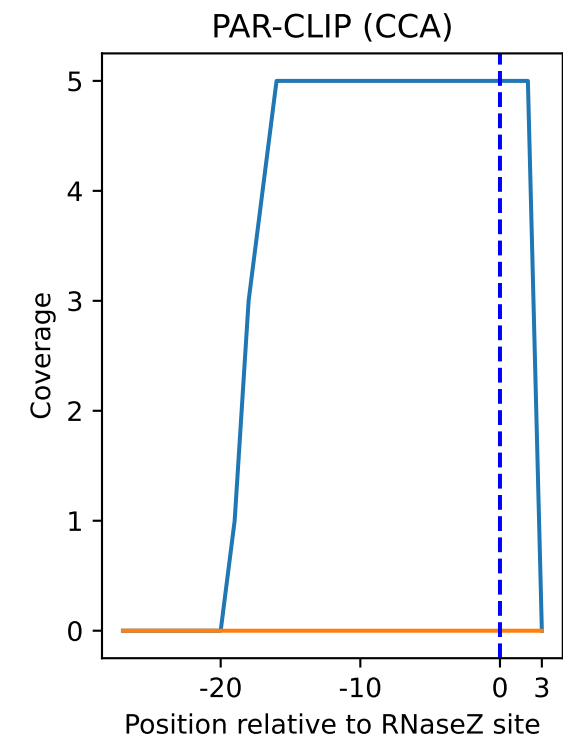

# tRNA-Tyr-GTA-2-1

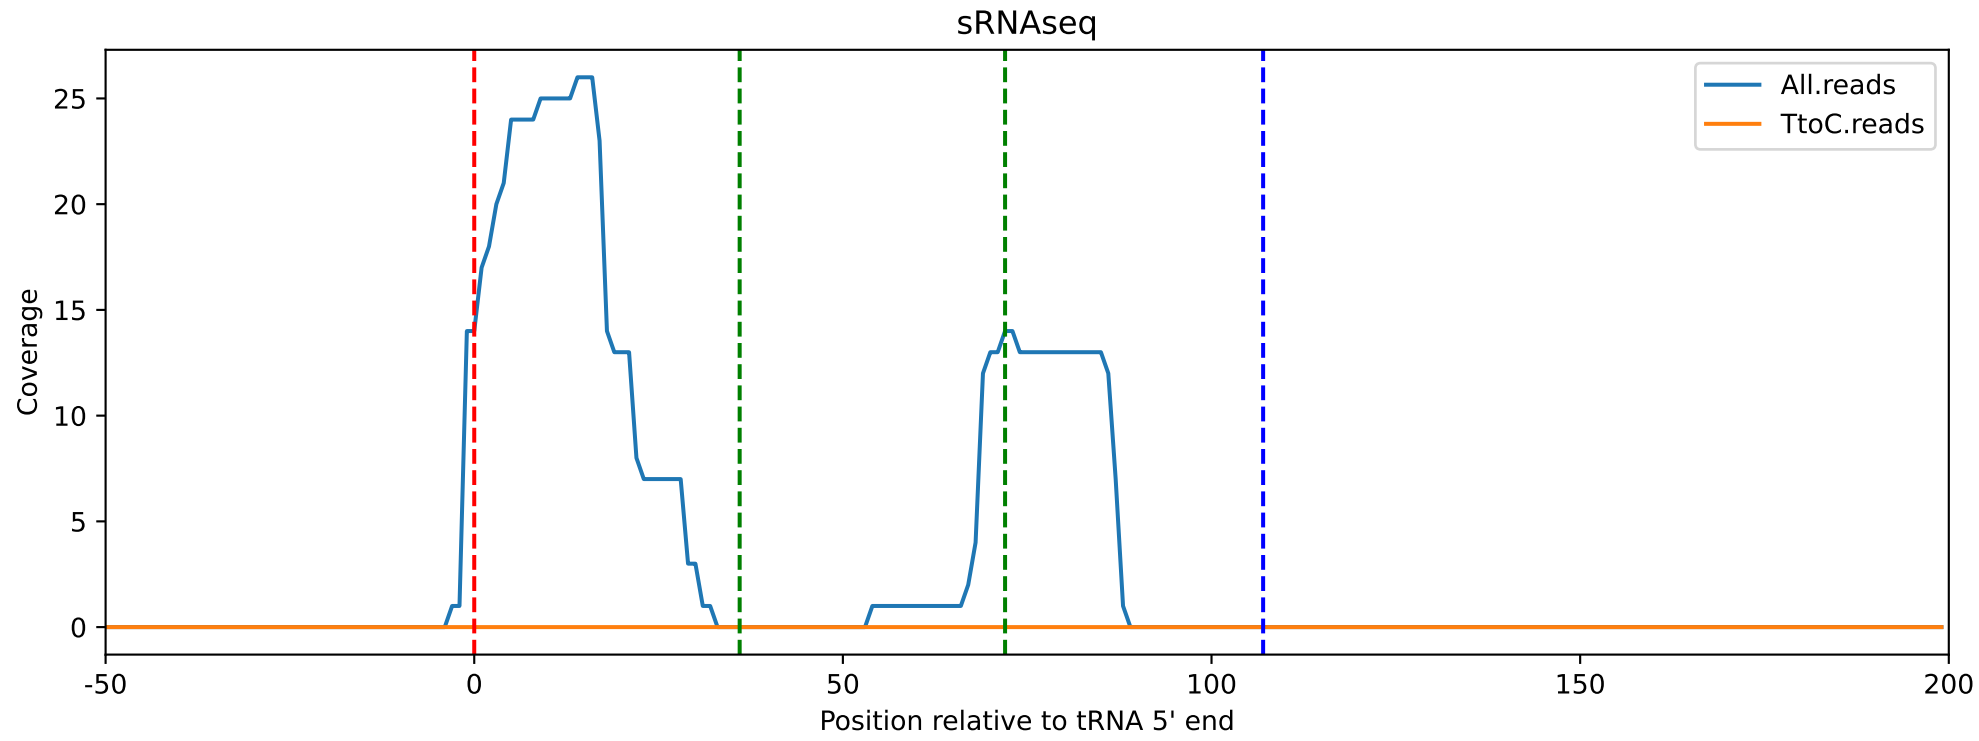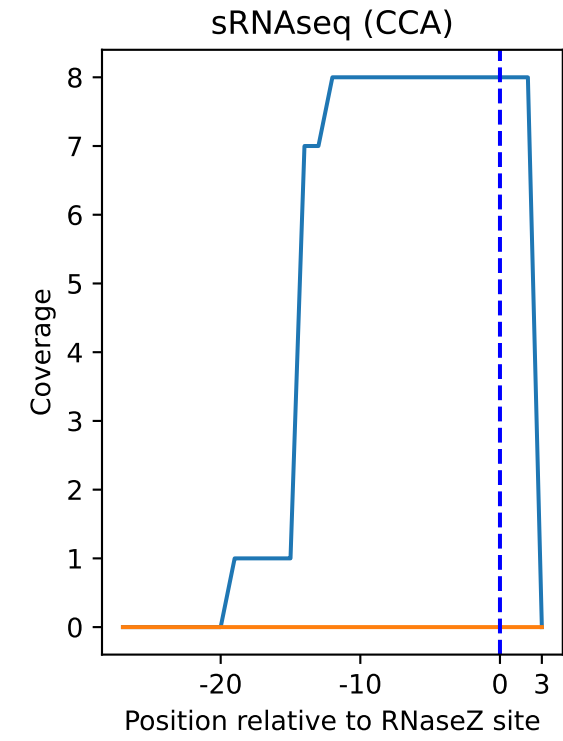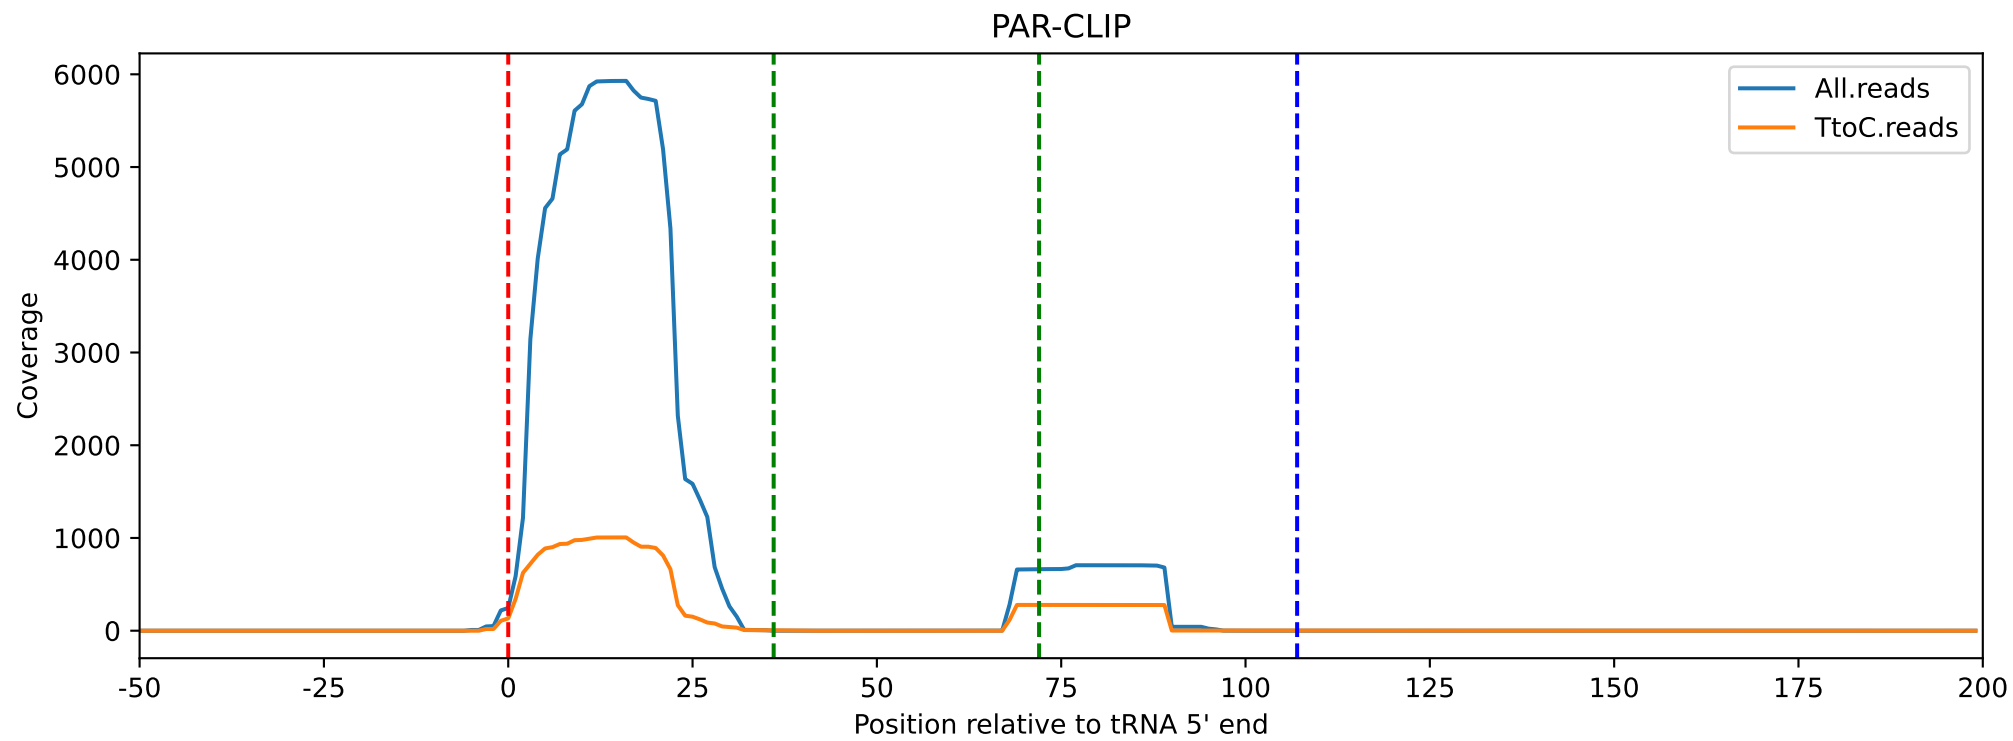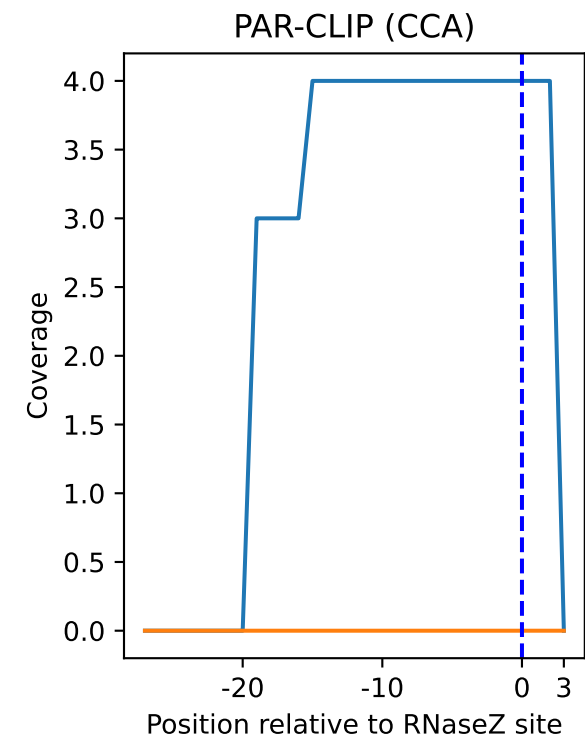

Supplement: mmc3.pdf [file mmc3.pdf]
